# Supplementary material
Source: publisher figshare collection journal article supplement (https://rs.figshare.com/ndownloader/files/37464464)
Supplement: Supplementary file 1 [file 37464464]

**README:** list of the archives found as supplementary information.

### **1.- Root directory:**

1a.- This README file

1b.- Ordered\_Nanoporous\_Metals\_Supp\_Information.docx: The file has 14 sections and two additional sections for describing metadynamics codes.

List of sections:

Section S1. EAM Potentials

Section S2. Lattice energy and cell parameter time dependence for Pt-CRI-ST3

Section S3. NVT stability of Ni-CRI-ST3 ONM

Section S4. Metadynamics simulations

Code S1: Plumed code used in the MetaD simulation

Code S2: Reweighting and calculating the histograms

Section S5.- Calculation of the thermal expansion coefficient,  $\alpha$ , and the specific heat,  $C_p$ .

Section S6.- Calculation of mean-squared displacements of methanol and water Ag-CRI ST3 ONM

Section S7.- List of stable ONMs structures designed in this work

Section S8.- Views of stable ONMs structures

Section S9.- Energy per atom vs density for Ni and Pt ONMs with alternative potentials

Section S10.- Porosities of stable ONMs

Section S11.- Empirical formula for calculating the critical PLD of stable ONMs

Section S12.- Porosities and stabilities of template MOFs and ST solids

Section S13.- Distribution of adsorption enthalpies and transport of benzene and xylene isomers

Section S14.- References

### **2.- ONMs\_Crystal\_Structures directory**

Cif files of our predicted ONMs:

2.1. ONM\_from\_MOF\_IRMOF16.cif

2.2. ONM\_from\_MOF\_NDC-MIL101.cif

2.3. ONM\_from\_MOF\_PCN6P.cif

2.4. ONM\_from\_ST\_CRI-ST3.cif

2.5. ONM\_from\_ST\_CRI-ST4.cif

2.6. ONM\_from\_ST\_SOD-ST3.cif

2.7. ONM\_from\_ST\_SOD-ST4.cif

### **3.- ONMs\_EAM\_Potential\_files directory**

EAM files:

3.1. EAM\_Ag.Sheng.lammps.eam

3.2. EAM\_Au.Sheng.lammps.eam

3.3. EAM\_Ni.OrtizRoldan.eam

3.4. EAM\_Ni.Sheng.lammps.eam

3.5. EAM\_Pd.Sheng.lammps.eam

3.6. EAM\_Pt.Johnson.lammps.eam

3.7. EAM\_Pt.Sheng.lammps.eam

### **4.- Xylenes\_Ag\_CRIST3\_Diffusion directory**

RASPA files to run MD simulations of ortho, meta and paraxylene in Ag\_CRISTobalite ONM:

4.1. 1a\_ag\_CRIST3\_ortho\_xylene\_jalkanen

4.2. 1b\_ag\_CRIST3\_meta\_xylene\_jalkanen

4.3. 1c\_ag\_CRIST3\_para\_xylene\_jalkanen
