# Supplementary material
Source: publisher figshare collection journal article supplement (https://rs.figshare.com/ndownloader/files/37464464)
Supplement: Supplementary file 2 [file 37464464]

Archive with 47 entries (34 files):
- Ordered_Nanoporous_Metals_SI/
- Ordered_Nanoporous_Metals_SI/ONMs_Crystal_Structures/
- Ordered_Nanoporous_Metals_SI/ONMs_Crystal_Structures/ONM_from_MOF_IRMOF16.cif
- Ordered_Nanoporous_Metals_SI/ONMs_Crystal_Structures/ONM_from_MOF_NDC-MIL101.cif
- Ordered_Nanoporous_Metals_SI/ONMs_Crystal_Structures/ONM_from_MOF_PCN6P.cif
- Ordered_Nanoporous_Metals_SI/ONMs_Crystal_Structures/ONM_from_ST_CRI-ST3.cif
- Ordered_Nanoporous_Metals_SI/ONMs_Crystal_Structures/ONM_from_ST_CRI-ST4.cif
- Ordered_Nanoporous_Metals_SI/ONMs_Crystal_Structures/ONM_from_ST_SOD-ST3.cif
- Ordered_Nanoporous_Metals_SI/ONMs_Crystal_Structures/ONM_from_ST_SOD-ST4.cif
- Ordered_Nanoporous_Metals_SI/ONMs_EAM_Potential_files/
- Ordered_Nanoporous_Metals_SI/ONMs_EAM_Potential_files/EAM_Ag.Sheng.lammps.eam
- Ordered_Nanoporous_Metals_SI/ONMs_EAM_Potential_files/EAM_Au.Sheng.lammps.eam
- Ordered_Nanoporous_Metals_SI/ONMs_EAM_Potential_files/EAM_Ni.OrtizRoldan.eam
- Ordered_Nanoporous_Metals_SI/ONMs_EAM_Potential_files/EAM_Ni.Sheng.lammps.eam
- Ordered_Nanoporous_Metals_SI/ONMs_EAM_Potential_files/EAM_Pd.Sheng.lammps.eam
- Ordered_Nanoporous_Metals_SI/ONMs_EAM_Potential_files/EAM_Pt.Johnson.lammps.eam
- Ordered_Nanoporous_Metals_SI/ONMs_EAM_Potential_files/EAM_Pt.Sheng.lammps.eam
- Ordered_Nanoporous_Metals_SI/Ordered_Nanoporous_Metals_Supp_Information.pdf
- Ordered_Nanoporous_Metals_SI/README_Supplementary_Information_Index_Ordered_Nanoporous_Metals_OrtizRoldan.pdf
- Ordered_Nanoporous_Metals_SI/Xylenes_Ag_CRIst3_Diffusion/
- Ordered_Nanoporous_Metals_SI/Xylenes_Ag_CRIst3_Diffusion/1a_ag_CRIst3_orthoxylene_jalkanen/
- Ordered_Nanoporous_Metals_SI/Xylenes_Ag_CRIst3_Diffusion/1a_ag_CRIst3_orthoxylene_jalkanen/0deposit/
- Ordered_Nanoporous_Metals_SI/Xylenes_Ag_CRIst3_Diffusion/1a_ag_CRIst3_orthoxylene_jalkanen/0deposit/Ag.Sheng.lammps.eam
- Ordered_Nanoporous_Metals_SI/Xylenes_Ag_CRIst3_Diffusion/1a_ag_CRIst3_orthoxylene_jalkanen/0deposit/cri_st3_ag_foam.data
- Ordered_Nanoporous_Metals_SI/Xylenes_Ag_CRIst3_Diffusion/1a_ag_CRIst3_orthoxylene_jalkanen/0deposit/in.lmp
- Ordered_Nanoporous_Metals_SI/Xylenes_Ag_CRIst3_Diffusion/1a_ag_CRIst3_orthoxylene_jalkanen/0deposit/molecule.o-xylene
- Ordered_Nanoporous_Metals_SI/Xylenes_Ag_CRIst3_Diffusion/1a_ag_CRIst3_orthoxylene_jalkanen/1min_nvt_npt/
- Ordered_Nanoporous_Metals_SI/Xylenes_Ag_CRIst3_Diffusion/1a_ag_CRIst3_orthoxylene_jalkanen/1min_nvt_npt/Ag.Sheng.lammps.eam
- Ordered_Nanoporous_Metals_SI/Xylenes_Ag_CRIst3_Diffusion/1a_ag_CRIst3_orthoxylene_jalkanen/1min_nvt_npt/in.lmp
- Ordered_Nanoporous_Metals_SI/Xylenes_Ag_CRIst3_Diffusion/1b_ag_CRIst3_metaxylene_jalkanen/
- Ordered_Nanoporous_Metals_SI/Xylenes_Ag_CRIst3_Diffusion/1b_ag_CRIst3_metaxylene_jalkanen/0deposit/
- Ordered_Nanoporous_Metals_SI/Xylenes_Ag_CRIst3_Diffusion/1b_ag_CRIst3_metaxylene_jalkanen/0deposit/Ag.Sheng.lammps.eam
- Ordered_Nanoporous_Metals_SI/Xylenes_Ag_CRIst3_Diffusion/1b_ag_CRIst3_metaxylene_jalkanen/0deposit/cri_st3_ag_foam.data
- Ordered_Nanoporous_Metals_SI/Xylenes_Ag_CRIst3_Diffusion/1b_ag_CRIst3_metaxylene_jalkanen/0deposit/in.lmp
- Ordered_Nanoporous_Metals_SI/Xylenes_Ag_CRIst3_Diffusion/1b_ag_CRIst3_metaxylene_jalkanen/0deposit/molecule.metaxylene
- Ordered_Nanoporous_Metals_SI/Xylenes_Ag_CRIst3_Diffusion/1b_ag_CRIst3_metaxylene_jalkanen/1min_nvt_npt/
- Ordered_Nanoporous_Metals_SI/Xylenes_Ag_CRIst3_Diffusion/1b_ag_CRIst3_metaxylene_jalkanen/1min_nvt_npt/Ag.Sheng.lammps.eam
- Ordered_Nanoporous_Metals_SI/Xylenes_Ag_CRIst3_Diffusion/1b_ag_CRIst3_metaxylene_jalkanen/1min_nvt_npt/in.lmp
- Ordered_Nanoporous_Metals_SI/Xylenes_Ag_CRIst3_Diffusion/1c_ag_CRIst3_paraxylene_jalkanen/
- Ordered_Nanoporous_Metals_SI/Xylenes_Ag_CRIst3_Diffusion/1c_ag_CRIst3_paraxylene_jalkanen/0deposit/
- Ordered_Nanoporous_Metals_SI/Xylenes_Ag_CRIst3_Diffusion/1c_ag_CRIst3_paraxylene_jalkanen/0deposit/Ag.Sheng.lammps.eam
- Ordered_Nanoporous_Metals_SI/Xylenes_Ag_CRIst3_Diffusion/1c_ag_CRIst3_paraxylene_jalkanen/0deposit/cri_st3_ag_foam.data
- Ordered_Nanoporous_Metals_SI/Xylenes_Ag_CRIst3_Diffusion/1c_ag_CRIst3_paraxylene_jalkanen/0deposit/in.lmp
- Ordered_Nanoporous_Metals_SI/Xylenes_Ag_CRIst3_Diffusion/1c_ag_CRIst3_paraxylene_jalkanen/0deposit/molecule.paraxylene
- Ordered_Nanoporous_Metals_SI/Xylenes_Ag_CRIst3_Diffusion/1c_ag_CRIst3_paraxylene_jalkanen/1min_nvt_npt/
- Ordered_Nanoporous_Metals_SI/Xylenes_Ag_CRIst3_Diffusion/1c_ag_CRIst3_paraxylene_jalkanen/1min_nvt_npt/Ag.Sheng.lammps.eam
- Ordered_Nanoporous_Metals_SI/Xylenes_Ag_CRIst3_Diffusion/1c_ag_CRIst3_paraxylene_jalkanen/1min_nvt_npt/in.lmp
