# Supplementary material
Source: publisher figshare collection journal article supplement (https://rs.figshare.com/ndownloader/files/37464464)
Supplement: Supplementary file 2 [file 37464464 › Ordered_Nanoporous_Metals_SI/ONMs_Crystal_Structures/ONM_from_MOF_IRMOF16.cif]

data_block_1
#***********************************************************************************************
#
# On use of this cif file, please acknowledge citation to: 
#
# Understanding the stability and structural properties of Ordered Nanoporous Metals towards their rational synthesis
# Jose M. Ortiz-Roldan, Salvador R. G. Balestra, Rocio Bueno-Perez, Sof�a Calero,
# Elena Garcia-Perez, C. Richard A. Catlow, A. Rabdel Ruiz-Salvador, Said Hamad
# Proc. R Soc. A 2022
#
# Contact emails: : said@upo.es, rruisal@upo.es, c.r.a.catlow@ucl.ac.uk
#
#***********************************************************************************************

_audit_creation_date         'Tue March 22 2022'
_audit_creation_method       'generated by GDIS v0.90'


_cell_length_a             84.7175
_cell_length_b             84.7588
_cell_length_c             84.7177
_cell_angle_alpha          90.00
_cell_angle_beta           90.00
_cell_angle_gamma          90.00


_symmetry_space_group_name_H-M   'P 1'
_symmetry_Int_Tables_number       1


loop_
_atom_site_label
_atom_site_fract_x
_atom_site_fract_y
_atom_site_fract_z
Pt    0.0757    0.1648    0.0987
Pt    0.0760    0.1676    0.0541
Pt    0.0761    0.0775    0.1000
Pt    0.2572    0.2101    0.1004
Pt    0.2570    0.2333    0.0306
Pt    0.0766    0.0778    0.0556
Pt    0.2559    0.0542    0.1225
Pt    0.0785    0.0318    0.1002
Pt    0.1670    0.2330    0.0800
Pt    0.0759    0.0322    0.0533
Pt    0.0757    0.0076    0.1206
Pt    0.1003    0.0090    0.0556
Pt    0.2569    0.2338    0.0769
Pt    0.1654    0.2332    0.0293
Pt    0.0529    0.2335    0.0075
Pt    0.0296    0.0089    0.0310
Pt    0.0284    0.2075    0.1018
Pt    0.0081    0.2561    0.0306
Pt    0.0306    0.2098    0.0545
Pt    0.0285    0.1634    0.0559
Pt    0.0521    0.0539    0.0553
Pt    0.0538    0.0542    0.1004
Pt    0.0298    0.1199    0.0554
Pt    0.0526    0.0983    0.0545
Pt    0.0286    0.0764    0.1005
Pt    0.0534    0.1425    0.0546
Pt    0.0292    0.0770    0.0553
Pt    0.0523    0.1880    0.0557
Pt    0.0535    0.1872    0.1002
Pt    0.0313    0.0300    0.0975
Pt    0.0536    0.2337    0.0542
Pt    0.0530    0.2326    0.0979
Pt    0.1670    0.2116    0.0545
Pt    0.0294    0.0315    0.0539
Pt    0.1215    0.0080    0.0312
Pt    0.0991    0.0547    0.0536
Pt    0.1666    0.1872    0.0750
Pt    0.0998    0.1861    0.0534
Pt    0.0984    0.1885    0.0998
Pt    0.1674    0.1880    0.0309
Pt    0.0991    0.2339    0.0538
Pt    0.1645    0.0758    0.0985
Pt    0.1602    0.0811    0.0504
Pt    0.2107    0.2118    0.0076
Pt    0.1451    0.0537    0.0563
Pt    0.1454    0.1869    0.0537
Pt    0.1656    0.0988    0.0759
Pt    0.1440    0.2329    0.0545
Pt    0.1436    0.2556    0.0325
Pt    0.1673    0.0303    0.0524
Pt    0.1658    0.0534    0.0786
Pt    0.1656    0.0542    0.0311
Pt    0.1893    0.0537    0.0529
Pt    0.1885    0.0548    0.0988
Pt    0.0299    0.0760    0.0087
Pt    0.1873    0.1009    0.0524
Pt    0.1873    0.0978    0.0993
Pt    0.0762    0.2099    0.0535
Pt    0.1883    0.1430    0.0545
Pt    0.0775    0.2106    0.1012
Pt    0.1884    0.1860    0.0530
Pt    0.1873    0.1881    0.0995
Pt    0.1227    0.2328    0.0762
Pt    0.1884    0.2349    0.0516
Pt    0.1890    0.2356    0.0998
Pt    0.0309    0.0071    0.0752
Pt    0.0772    0.1212    0.0549
Pt    0.1219    0.2103    0.0534
Pt    0.2099    0.2351    0.1232
Pt    0.2353    0.0549    0.0538
Pt    0.2334    0.0544    0.0984
Pt    0.2114    0.2329    0.0780
Pt    0.2351    0.0993    0.0537
Pt    0.2111    0.2331    0.0298
Pt    0.2350    0.1438    0.0543
Pt    0.2108    0.1870    0.1212
Pt    0.2351    0.1880    0.0551
Pt    0.2342    0.1859    0.1006
Pt    0.2099    0.1870    0.0765
Pt    0.2333    0.2323    0.0544
Pt    0.2334    0.2332    0.0987
Pt    0.1673    0.0780    0.0088
Pt    0.0771    0.0771    0.0081
Pt    0.2111    0.1878    0.0287
Pt    0.2095    0.2110    0.1006
Pt    0.2112    0.2094    0.0553
Pt    0.2111    0.1425    0.0776
Pt    0.2108    0.1649    0.0534
Pt    0.2120    0.1434    0.0323
Pt    0.2112    0.1209    0.0545
Pt    0.2120    0.1019    0.0771
Pt    0.2112    0.0777    0.0994
Pt    0.2112    0.0778    0.0524
Pt    0.2112    0.1006    0.0305
Pt    0.2106    0.0322    0.0992
Pt    0.2124    0.0314    0.0524
Pt    0.0534    0.0324    0.0325
Pt    0.0535    0.0293    0.0754
Pt    0.0552    0.0301    0.1204
Pt    0.0517    0.0759    0.0310
Pt    0.0540    0.0754    0.0778
Pt    0.0525    0.0769    0.1211
Pt    0.0543    0.1222    0.0313
Pt    0.0526    0.1216    0.0766
Pt    0.0541    0.1655    0.0304
Pt    0.0525    0.1638    0.0774
Pt    0.0529    0.2113    0.0308
Pt    0.0535    0.2101    0.0784
Pt    0.0542    0.2097    0.1214
Pt    0.2109    0.1652    0.0077
Pt    0.1016    0.0549    0.0092
Pt    0.1896    0.2563    0.0755
Pt    0.0992    0.0314    0.0317
Pt    0.0991    0.0327    0.0765
Pt    0.1005    0.0774    0.0310
Pt    0.0990    0.0785    0.0774
Pt    0.0988    0.1649    0.0767
Pt    0.1000    0.2097    0.0305
Pt    0.0997    0.2098    0.0760
Pt    0.1670    0.0300    0.0082
Pt    0.1674    0.0082    0.0746
Pt    0.1450    0.0303    0.0313
Pt    0.1436    0.0772    0.0771
Pt    0.1441    0.2078    0.0298
Pt    0.1457    0.2092    0.0783
Pt    0.0553    0.0079    0.0532
Pt    0.0304    0.2562    0.0989
Pt    0.1901    0.0311    0.0292
Pt    0.1893    0.0313    0.0761
Pt    0.1866    0.0301    0.1199
Pt    0.1878    0.0773    0.0321
Pt    0.1885    0.0783    0.0742
Pt    0.1864    0.0750    0.1220
Pt    0.1860    0.1222    0.0318
Pt    0.1880    0.1212    0.0782
Pt    0.1867    0.1656    0.0295
Pt    0.1885    0.1651    0.0762
Pt    0.1883    0.2104    0.0315
Pt    0.1881    0.2108    0.0773
Pt    0.1887    0.2122    0.1221
Pt    0.1226    0.2317    0.0302
Pt    0.1218    0.1879    0.0751
Pt    0.2349    0.0309    0.0308
Pt    0.2329    0.0291    0.0766
Pt    0.2345    0.0314    0.1216
Pt    0.2344    0.0785    0.0306
Pt    0.2336    0.0780    0.0763
Pt    0.2351    0.0774    0.1213
Pt    0.2346    0.1236    0.0318
Pt    0.2338    0.1658    0.0308
Pt    0.2342    0.1652    0.0775
Pt    0.2350    0.2108    0.0299
Pt    0.2335    0.2083    0.0775
Pt    0.2354    0.2110    0.1226
Pt    0.1220    0.0560    0.0781
Pt    0.1243    0.0547    0.0323
Pt    0.2117    0.0540    0.0295
Pt    0.2118    0.0544    0.1218
Pt    0.1221    0.0779    0.0551
Pt    0.1225    0.0321    0.0542
Pt    0.0294    0.0535    0.0314
Pt    0.0297    0.0540    0.0785
Pt    0.0301    0.0512    0.1217
Pt    0.0302    0.0996    0.0320
Pt    0.0311    0.0984    0.0792
Pt    0.0301    0.1428    0.0324
Pt    0.0278    0.1413    0.0794
Pt    0.0316    0.1874    0.0323
Pt    0.0307    0.1867    0.0790
Pt    0.0305    0.2338    0.0305
Pt    0.0295    0.2320    0.0769
Pt    0.0301    0.2321    0.1205
Pt    0.2118    0.0544    0.0762
Pt    0.0305    0.1205    0.0089
Pt    0.0538    0.2559    0.0778
Pt    0.0767    0.0559    0.0308
Pt    0.0768    0.0536    0.0786
Pt    0.0763    0.0545    0.1218
Pt    0.0769    0.0987    0.0328
Pt    0.0757    0.0989    0.0768
Pt    0.0799    0.1438    0.0333
Pt    0.0762    0.1441    0.0759
Pt    0.0772    0.1888    0.0285
Pt    0.0763    0.1871    0.0773
Pt    0.0770    0.1852    0.1218
Pt    0.0771    0.2331    0.0310
Pt    0.0764    0.2326    0.0749
Pt    0.0984    0.0080    0.0081
Pt    0.0299    0.1662    0.0080
Pt    0.2560    0.0074    0.0750
Pt    0.0321    0.2567    0.0535
Pt    0.1207    0.2561    0.0548
Pt    0.0997    0.2561    0.0791
Pt    0.1439    0.0078    0.0545
Pt    0.1214    0.0309    0.0083
Pt    0.2330    0.0076    0.0987
Pt    0.0079    0.0084    0.0078
Pt    0.1434    0.0073    0.0081
Pt    0.2566    0.0312    0.0990
Pt    0.2567    0.2557    0.0547
Pt    0.1875    0.0541    0.0074
Pt    0.2344    0.2345    0.0084
Pt    0.0758    0.2537    0.1006
Pt    0.1891    0.2563    0.0294
Pt    0.2348    0.2563    0.1200
Pt    0.1427    0.2553    0.0772
Pt    0.0768    0.2568    0.0557
Pt    0.0764    0.1217    0.0078
Pt    0.1648    0.2554    0.0555
Pt    0.0520    0.2564    0.1221
Pt    0.0757    0.0312    0.0089
Pt    0.0546    0.0537    0.0076
Pt    0.2111    0.2567    0.0988
Pt    0.2570    0.2111    0.0533
Pt    0.0529    0.2567    0.0298
Pt    0.0995    0.2338    0.0087
Pt    0.0543    0.0989    0.0078
Pt    0.0993    0.2561    0.0302
Pt    0.1222    0.2084    0.0078
Pt    0.0769    0.1645    0.0081
Pt    0.1890    0.1007    0.0082
Pt    0.2114    0.1222    0.0078
Pt    0.0307    0.0313    0.0093
Pt    0.2360    0.1444    0.0077
Pt    0.0073    0.2331    0.0541
Pt    0.2565    0.0553    0.2560
Pt    0.0310    0.2115    0.2321
Pt    0.1647    0.2327    0.2564
Pt    0.0076    0.0558    0.1424
Pt    0.0763    0.0319    0.1872
Pt    0.0787    0.0310    0.1424
Pt    0.2569    0.0074    0.2122
Pt    0.0080    0.0318    0.1653
Pt    0.2573    0.0298    0.1887
Pt    0.2565    0.2107    0.1890
Pt    0.2570    0.0774    0.1854
Pt    0.0541    0.1667    0.2562
Pt    0.2545    0.2099    0.2341
Pt    0.0771    0.0318    0.2343
Pt    0.2543    0.1888    0.2105
Pt    0.0759    0.0780    0.1430
Pt    0.0074    0.0763    0.2096
Pt    0.1651    0.2098    0.2337
Pt    0.0527    0.0537    0.1434
Pt    0.0518    0.0535    0.1866
Pt    0.0520    0.0537    0.2340
Pt    0.0537    0.0998    0.1878
Pt    0.0544    0.0984    0.2347
Pt    0.0563    0.1446    0.1874
Pt    0.0562    0.1415    0.2354
Pt    0.0550    0.1860    0.1425
Pt    0.0523    0.1870    0.1869
Pt    0.0537    0.1885    0.2334
Pt    0.0553    0.2339    0.1429
Pt    0.0549    0.2333    0.1871
Pt    0.0534    0.2338    0.2332
Pt    0.1665    0.2106    0.1864
Pt    0.1657    0.1666    0.1861
Pt    0.0994    0.0541    0.1878
Pt    0.1001    0.0553    0.2346
Pt    0.0990    0.0992    0.1871
Pt    0.0993    0.1888    0.1867
Pt    0.0997    0.1867    0.2331
Pt    0.0994    0.2337    0.1868
Pt    0.1001    0.2332    0.2344
Pt    0.1654    0.0772    0.2334
Pt    0.1455    0.0549    0.1885
Pt    0.1428    0.0534    0.2332
Pt    0.1437    0.1877    0.1864
Pt    0.1425    0.1873    0.2345
Pt    0.1428    0.2324    0.1861
Pt    0.1423    0.2328    0.2337
Pt    0.1665    0.0761    0.1886
Pt    0.1644    0.0308    0.2347
Pt    0.1660    0.0310    0.1880
Pt    0.1867    0.0536    0.1429
Pt    0.1900    0.0538    0.1895
Pt    0.1882    0.0542    0.2352
Pt    0.1890    0.0983    0.1891
Pt    0.1880    0.0983    0.2348
Pt    0.1875    0.1416    0.1865
Pt    0.1867    0.1879    0.1429
Pt    0.1896    0.1878    0.1888
Pt    0.1873    0.1878    0.2324
Pt    0.1881    0.2339    0.1871
Pt    0.1872    0.2337    0.2344
Pt    0.0771    0.0768    0.1890
Pt    0.0082    0.2336    0.2340
Pt    0.1210    0.2100    0.2329
Pt    0.2329    0.0543    0.1440
Pt    0.2336    0.0532    0.1874
Pt    0.2336    0.0533    0.2338
Pt    0.2338    0.1028    0.1866
Pt    0.2342    0.0998    0.2311
Pt    0.2326    0.1423    0.2340
Pt    0.2339    0.1864    0.1411
Pt    0.2328    0.1871    0.1871
Pt    0.2327    0.1871    0.2342
Pt    0.2336    0.2343    0.1439
Pt    0.2335    0.2344    0.1879
Pt    0.2323    0.2344    0.2344
Pt    0.2321    0.0077    0.2363
Pt    0.0086    0.0535    0.1895
Pt    0.2573    0.0307    0.1449
Pt    0.2103    0.2103    0.2347
Pt    0.2099    0.2123    0.1860
Pt    0.2121    0.2097    0.1433
Pt    0.2108    0.1652    0.2338
Pt    0.2122    0.1636    0.1878
Pt    0.2104    0.1209    0.2338
Pt    0.2096    0.1207    0.1876
Pt    0.2112    0.0758    0.2347
Pt    0.2114    0.0781    0.1876
Pt    0.2095    0.0792    0.1423
Pt    0.2110    0.0301    0.2360
Pt    0.2113    0.0297    0.1885
Pt    0.2109    0.0310    0.1423
Pt    0.0546    0.0302    0.1646
Pt    0.0526    0.0305    0.2113
Pt    0.2338    0.0076    0.1443
Pt    0.0509    0.0798    0.1633
Pt    0.0547    0.0775    0.2103
Pt    0.0776    0.0076    0.1641
Pt    0.0536    0.1215    0.2106
Pt    0.2562    0.0988    0.2089
Pt    0.0538    0.1650    0.2116
Pt    0.0753    0.0086    0.2096
Pt    0.0526    0.2101    0.1649
Pt    0.0538    0.2111    0.2087
Pt    0.0079    0.2104    0.2104
Pt    0.0987    0.0093    0.1868
Pt    0.2557    0.1429    0.2088
Pt    0.0531    0.0077    0.2318
Pt    0.0990    0.0310    0.2118
Pt    0.2565    0.1654    0.1873
Pt    0.1003    0.0761    0.1638
Pt    0.1010    0.0790    0.2120
Pt    0.2572    0.2563    0.1428
Pt    0.0990    0.2090    0.2105
Pt    0.2111    0.1874    0.1643
Pt    0.0082    0.0072    0.1433
Pt    0.0079    0.1880    0.2328
Pt    0.1424    0.0297    0.2090
Pt    0.0090    0.1446    0.1873
Pt    0.1442    0.0773    0.2112
Pt    0.0752    0.0539    0.2569
Pt    0.1424    0.2109    0.2097
Pt    0.2099    0.1430    0.2103
Pt    0.0542    0.2561    0.1643
Pt    0.2085    0.2350    0.2110
Pt    0.1875    0.0292    0.1643
Pt    0.1870    0.0291    0.2115
Pt    0.0530    0.2106    0.2563
Pt    0.1863    0.0756    0.1650
Pt    0.1882    0.0757    0.2116
Pt    0.2566    0.0765    0.2332
Pt    0.1869    0.1211    0.2112
Pt    0.1891    0.1661    0.1667
Pt    0.1855    0.1633    0.2103
Pt    0.1437    0.2557    0.2097
Pt    0.1862    0.2136    0.1635
Pt    0.1882    0.2107    0.2109
Pt    0.0783    0.1654    0.1885
Pt    0.0298    0.2067    0.1422
Pt    0.2093    0.2344    0.1628
Pt    0.1656    0.2339    0.2095
Pt    0.2330    0.0297    0.1658
Pt    0.2327    0.0301    0.2119
Pt    0.2559    0.0779    0.1449
Pt    0.2329    0.0799    0.1636
Pt    0.2329    0.0765    0.2097
Pt    0.0314    0.2567    0.2333
Pt    0.2323    0.1226    0.2101
Pt    0.1656    0.1894    0.1656
Pt    0.2336    0.1641    0.2102
Pt    0.2104    0.0990    0.2110
Pt    0.2336    0.2105    0.1660
Pt    0.2319    0.2124    0.2100
Pt    0.0306    0.0755    0.1870
Pt    0.1665    0.0534    0.2122
Pt    0.1651    0.1879    0.2097
Pt    0.0295    0.2113    0.1873
Pt    0.1207    0.2102    0.1871
Pt    0.1226    0.0795    0.2355
Pt    0.1212    0.0752    0.1879
Pt    0.0284    0.0560    0.1631
Pt    0.0310    0.0515    0.2113
Pt    0.0290    0.0294    0.2336
Pt    0.0312    0.0988    0.2100
Pt    0.0310    0.0300    0.1868
Pt    0.0304    0.1422    0.2108
Pt    0.0296    0.0298    0.1430
Pt    0.0299    0.1856    0.1649
Pt    0.0301    0.1889    0.2094
Pt    0.0307    0.1659    0.2334
Pt    0.0303    0.2332    0.1659
Pt    0.0295    0.2335    0.2103
Pt    0.0768    0.1652    0.2346
Pt    0.1222    0.0298    0.2338
Pt    0.0307    0.0768    0.2330
Pt    0.2112    0.0536    0.2111
Pt    0.0755    0.0557    0.1661
Pt    0.0751    0.0537    0.2112
Pt    0.0769    0.0763    0.2339
Pt    0.0771    0.0984    0.1658
Pt    0.0782    0.0998    0.2140
Pt    0.0309    0.1219    0.1861
Pt    0.0773    0.1424    0.2111
Pt    0.0755    0.1867    0.1650
Pt    0.0768    0.1863    0.2105
Pt    0.2109    0.1884    0.2102
Pt    0.0774    0.2336    0.1648
Pt    0.0782    0.2332    0.2107
Pt    0.0323    0.1201    0.2344
Pt    0.0748    0.2113    0.2330
Pt    0.0772    0.2107    0.1880
Pt    0.1220    0.0524    0.2090
Pt    0.2106    0.0549    0.1651
Pt    0.1209    0.1865    0.2096
Pt    0.0764    0.1207    0.1903
Pt    0.1208    0.2338    0.2100
Pt    0.0309    0.1661    0.1881
Pt    0.0772    0.2101    0.1444
Pt    0.2548    0.1652    0.2340
Pt    0.1649    0.2557    0.1869
Pt    0.2556    0.0537    0.1664
Pt    0.2552    0.2322    0.2124
Pt    0.0082    0.0768    0.2572
Pt    0.2569    0.2559    0.1888
Pt    0.2571    0.0558    0.2108
Pt    0.0527    0.0306    0.2556
Pt    0.0984    0.2568    0.2104
Pt    0.2571    0.0981    0.2567
Pt    0.2557    0.1882    0.2562
Pt    0.0777    0.2570    0.1867
Pt    0.2549    0.1863    0.1638
Pt    0.1881    0.2105    0.2566
Pt    0.0308    0.0987    0.2570
Pt    0.0307    0.2570    0.1870
Pt    0.1865    0.1651    0.2560
Pt    0.2556    0.0299    0.2345
Pt    0.0299    0.2569    0.1435
Pt    0.0751    0.0086    0.2567
Pt    0.0078    0.1001    0.1859
Pt    0.2339    0.2556    0.2113
Pt    0.0996    0.2566    0.2569
Pt    0.0544    0.2553    0.2098
Pt    0.0075    0.1650    0.2569
Pt    0.2557    0.2337    0.2563
Pt    0.1001    0.0325    0.2563
Pt    0.2345    0.1196    0.2562
Pt    0.0990    0.2102    0.2552
Pt    0.2088    0.1426    0.2560
Pt    0.1638    0.1873    0.2569
Pt    0.0771    0.2343    0.2553
Pt    0.1228    0.0559    0.2560
Pt    0.0528    0.2558    0.2563
Pt    0.0771    0.0988    0.2573
Pt    0.2316    0.2099    0.2572
Pt    0.1870    0.0071    0.2813
Pt    0.2107    0.0993    0.2576
Pt    0.2572    0.0304    0.3734
Pt    0.1217    0.0075    0.3057
Pt    0.1209    0.0084    0.2585
Pt    0.0988    0.0079    0.2802
Pt    0.0775    0.0083    0.3488
Pt    0.0769    0.2116    0.3678
Pt    0.0759    0.2128    0.3267
Pt    0.0085    0.1890    0.3251
Pt    0.0085    0.0073    0.3263
Pt    0.0076    0.1656    0.3036
Pt    0.0766    0.2114    0.2804
Pt    0.0086    0.1446    0.3267
Pt    0.0771    0.1659    0.3270
Pt    0.2102    0.0764    0.3711
Pt    0.2098    0.0757    0.3278
Pt    0.2105    0.0758    0.2818
Pt    0.0537    0.0535    0.2806
Pt    0.0529    0.0541    0.3261
Pt    0.0534    0.0542    0.3715
Pt    0.0544    0.0982    0.2817
Pt    0.0530    0.0992    0.3281
Pt    0.0558    0.1420    0.2801
Pt    0.0545    0.1428    0.3269
Pt    0.0530    0.1900    0.2804
Pt    0.0537    0.1888    0.3264
Pt    0.0531    0.1874    0.3727
Pt    0.0537    0.2337    0.2796
Pt    0.0530    0.2352    0.3276
Pt    0.0531    0.2344    0.3714
Pt    0.2129    0.0310    0.3713
Pt    0.2099    0.0298    0.3268
Pt    0.0986    0.0546    0.2804
Pt    0.0995    0.0533    0.3295
Pt    0.0999    0.1002    0.3283
Pt    0.0989    0.1864    0.2804
Pt    0.0971    0.1896    0.3266
Pt    0.0996    0.2336    0.2799
Pt    0.0973    0.2339    0.3271
Pt    0.2098    0.0290    0.2813
Pt    0.1423    0.0540    0.2808
Pt    0.1438    0.0528    0.3272
Pt    0.1426    0.1837    0.2811
Pt    0.1425    0.1874    0.3255
Pt    0.1427    0.2335    0.2801
Pt    0.1435    0.2333    0.3277
Pt    0.0079    0.0305    0.3500
Pt    0.0304    0.0072    0.3038
Pt    0.1651    0.2109    0.3282
Pt    0.1875    0.0537    0.2805
Pt    0.1876    0.0523    0.3269
Pt    0.1888    0.0528    0.3717
Pt    0.1888    0.1007    0.2807
Pt    0.1875    0.0990    0.3271
Pt    0.1884    0.1424    0.3254
Pt    0.1872    0.1857    0.2800
Pt    0.1872    0.1868    0.3254
Pt    0.1864    0.1868    0.3707
Pt    0.1876    0.2326    0.2798
Pt    0.1874    0.2336    0.3269
Pt    0.1652    0.2102    0.2791
Pt    0.1641    0.1645    0.3268
Pt    0.1656    0.0756    0.3265
Pt    0.2348    0.0527    0.2811
Pt    0.2332    0.0537    0.3271
Pt    0.2346    0.0540    0.3715
Pt    0.2345    0.0999    0.2798
Pt    0.2323    0.0983    0.3278
Pt    0.2329    0.1428    0.2796
Pt    0.2323    0.1874    0.2806
Pt    0.2347    0.1859    0.3261
Pt    0.2336    0.1865    0.3711
Pt    0.2341    0.2339    0.2804
Pt    0.2342    0.2329    0.3267
Pt    0.2335    0.2356    0.3706
Pt    0.0075    0.1214    0.3036
Pt    0.0525    0.0758    0.2577
Pt    0.2115    0.0072    0.3491
Pt    0.2108    0.2091    0.3711
Pt    0.2097    0.2110    0.3268
Pt    0.2106    0.2095    0.2802
Pt    0.2121    0.1644    0.3273
Pt    0.2107    0.1651    0.2809
Pt    0.2110    0.1208    0.3251
Pt    0.2114    0.1218    0.2805
Pt    0.0537    0.0310    0.3049
Pt    0.0539    0.0307    0.3498
Pt    0.0543    0.0775    0.3043
Pt    0.0511    0.0770    0.3500
Pt    0.0554    0.1196    0.3042
Pt    0.0545    0.1664    0.3037
Pt    0.0531    0.2119    0.3048
Pt    0.0517    0.2106    0.3496
Pt    0.0774    0.0095    0.3030
Pt    0.2334    0.0759    0.2591
Pt    0.0996    0.0307    0.3042
Pt    0.0984    0.0745    0.3067
Pt    0.0972    0.0758    0.3495
Pt    0.0992    0.2116    0.3029
Pt    0.0557    0.0073    0.3726
Pt    0.1454    0.0287    0.3067
Pt    0.1427    0.0771    0.3065
Pt    0.1425    0.2087    0.3022
Pt    0.1446    0.0779    0.2593
Pt    0.1854    0.0310    0.3049
Pt    0.1889    0.0287    0.3505
Pt    0.1872    0.0772    0.3044
Pt    0.1867    0.0761    0.3493
Pt    0.1871    0.1203    0.3043
Pt    0.1855    0.1638    0.3021
Pt    0.1859    0.1648    0.3477
Pt    0.1879    0.2097    0.3037
Pt    0.1876    0.2110    0.3511
Pt    0.0088    0.1429    0.2804
Pt    0.0078    0.2569    0.3028
Pt    0.2339    0.0305    0.3036
Pt    0.2362    0.0317    0.3488
Pt    0.2338    0.0757    0.3039
Pt    0.2340    0.0777    0.3507
Pt    0.2336    0.1211    0.3046
Pt    0.2355    0.1633    0.3046
Pt    0.2331    0.2095    0.3043
Pt    0.2337    0.2088    0.3493
Pt    0.0078    0.1883    0.2787
Pt    0.1208    0.2563    0.2800
Pt    0.1654    0.0784    0.2828
Pt    0.1655    0.0292    0.3297
Pt    0.0302    0.0554    0.3030
Pt    0.0295    0.0540    0.3490
Pt    0.0314    0.0997    0.3044
Pt    0.0317    0.1433    0.3029
Pt    0.0296    0.1886    0.3024
Pt    0.0305    0.1859    0.3502
Pt    0.0295    0.2347    0.3026
Pt    0.0295    0.2329    0.3487
Pt    0.1643    0.0317    0.2810
Pt    0.0084    0.0537    0.2797
Pt    0.0769    0.0529    0.3038
Pt    0.0752    0.0548    0.3501
Pt    0.0792    0.1008    0.3034
Pt    0.0759    0.0984    0.3502
Pt    0.0788    0.1428    0.3056
Pt    0.0764    0.1879    0.3031
Pt    0.0730    0.1880    0.3484
Pt    0.0758    0.2341    0.3030
Pt    0.0786    0.2376    0.3516
Pt    0.1651    0.2551    0.2794
Pt    0.1214    0.0530    0.3047
Pt    0.1194    0.1874    0.3047
Pt    0.1222    0.2336    0.3041
Pt    0.1209    0.2110    0.3262
Pt    0.1650    0.0542    0.3030
Pt    0.1655    0.1865    0.3029
Pt    0.1647    0.1884    0.3488
Pt    0.1657    0.2330    0.3037
Pt    0.1201    0.2093    0.2801
Pt    0.1217    0.0747    0.3305
Pt    0.2104    0.0532    0.3035
Pt    0.2118    0.0545    0.3494
Pt    0.2113    0.0977    0.3043
Pt    0.2104    0.1433    0.3031
Pt    0.2103    0.1862    0.3029
Pt    0.2090    0.1848    0.3490
Pt    0.2114    0.2329    0.3035
Pt    0.2105    0.2359    0.3493
Pt    0.1205    0.0769    0.2837
Pt    0.1220    0.0307    0.2826
Pt    0.0307    0.0073    0.3505
Pt    0.0979    0.0089    0.3267
Pt    0.0759    0.1646    0.2802
Pt    0.0089    0.1011    0.3287
Pt    0.2345    0.0090    0.3710
Pt    0.0765    0.1209    0.3275
Pt    0.1427    0.0307    0.2582
Pt    0.0299    0.0075    0.2579
Pt    0.0318    0.0302    0.2805
Pt    0.0311    0.0306    0.3275
Pt    0.0312    0.0327    0.3721
Pt    0.0300    0.0774    0.2820
Pt    0.0294    0.0756    0.3262
Pt    0.0311    0.1210    0.2794
Pt    0.0310    0.1232    0.3301
Pt    0.0336    0.1661    0.2814
Pt    0.0328    0.1656    0.3277
Pt    0.0286    0.2115    0.2807
Pt    0.0295    0.2108    0.3252
Pt    0.0303    0.2081    0.3725
Pt    0.0766    0.0777    0.3730
Pt    0.0749    0.0769    0.3275
Pt    0.0756    0.0768    0.2806
Pt    0.0747    0.0310    0.2804
Pt    0.0763    0.0312    0.3275
Pt    0.0805    0.0287    0.3732
Pt    0.2349    0.0082    0.3264
Pt    0.2561    0.2097    0.2802
Pt    0.2330    0.0075    0.2809
Pt    0.1659    0.0074    0.2581
Pt    0.0977    0.2567    0.3036
Pt    0.2112    0.2569    0.3251
Pt    0.0295    0.2570    0.2806
Pt    0.2562    0.0980    0.3051
Pt    0.2102    0.0077    0.2581
Pt    0.2105    0.0083    0.3043
Pt    0.0298    0.2333    0.2575
Pt    0.0090    0.0074    0.3721
Pt    0.0077    0.0540    0.3280
Pt    0.2567    0.1423    0.3057
Pt    0.0074    0.0773    0.3523
Pt    0.2556    0.2113    0.3709
Pt    0.2098    0.1880    0.2574
Pt    0.2568    0.1662    0.2804
Pt    0.2331    0.0290    0.2580
Pt    0.2569    0.0079    0.3036
Pt    0.2114    0.0524    0.2581
Pt    0.1880    0.0766    0.2577
Pt    0.0305    0.0517    0.2574
Pt    0.2565    0.0531    0.3038
Pt    0.2566    0.2567    0.3261
Pt    0.0301    0.2562    0.3704
Pt    0.1878    0.2556    0.3026
Pt    0.2569    0.2334    0.3035
Pt    0.2568    0.2334    0.3484
Pt    0.2112    0.2566    0.3722
Pt    0.2570    0.0763    0.3267
Pt    0.2563    0.2092    0.3258
Pt    0.2563    0.1878    0.3485
Pt    0.2571    0.2567    0.2798
Pt    0.0519    0.2552    0.3031
Pt    0.0757    0.2558    0.2802
Pt    0.2339    0.2566    0.3478
Pt    0.0751    0.2567    0.3258
Pt    0.0291    0.2569    0.3264
Pt    0.1656    0.2561    0.3250
Pt    0.0317    0.1439    0.2580
Pt    0.1420    0.2099    0.2580
Pt    0.1220    0.2341    0.2577
Pt    0.2102    0.2333    0.2577
Pt    0.0305    0.1886    0.2576
Pt    0.2555    0.1424    0.2587
Pt    0.2334    0.1644    0.2575
Pt    0.1210    0.1858    0.2579
Pt    0.0992    0.0779    0.2578
Pt    0.0549    0.1215    0.2580
Pt    0.1643    0.0552    0.2585
Pt    0.0774    0.1886    0.2579
Pt    0.1872    0.0313    0.2574
Pt    0.0765    0.2097    0.5069
Pt    0.1875    0.0541    0.5061
Pt    0.0774    0.0765    0.4616
Pt    0.0992    0.0076    0.4608
Pt    0.1650    0.0078    0.4369
Pt    0.0322    0.0308    0.4164
Pt    0.0765    0.0746    0.4142
Pt    0.0773    0.0071    0.4384
Pt    0.2104    0.0758    0.5072
Pt    0.2109    0.0071    0.3927
Pt    0.0081    0.1642    0.4352
Pt    0.0766    0.0303    0.4160
Pt    0.0312    0.0090    0.4850
Pt    0.1661    0.0079    0.4841
Pt    0.0774    0.0307    0.4626
Pt    0.1883    0.0072    0.4607
Pt    0.2112    0.0304    0.4157
Pt    0.2565    0.0313    0.4611
Pt    0.0088    0.0290    0.3940
Pt    0.0533    0.0540    0.4164
Pt    0.0544    0.0545    0.4628
Pt    0.0086    0.1643    0.4834
Pt    0.0530    0.0989    0.4615
Pt    0.2560    0.0072    0.4378
Pt    0.0549    0.1427    0.4584
Pt    0.0985    0.2566    0.4829
Pt    0.0514    0.1863    0.4143
Pt    0.0517    0.1884    0.4599
Pt    0.0074    0.1218    0.4824
Pt    0.0540    0.2357    0.4137
Pt    0.0538    0.2329    0.4613
Pt    0.1652    0.2316    0.4367
Pt    0.0768    0.0086    0.4860
Pt    0.1666    0.2083    0.4602
Pt    0.0986    0.0543    0.4595
Pt    0.1219    0.0079    0.4843
Pt    0.1005    0.1919    0.4136
Pt    0.0990    0.1873    0.4640
Pt    0.0779    0.1215    0.4607
Pt    0.0976    0.2333    0.4600
Pt    0.2567    0.2569    0.4161
Pt    0.1206    0.2090    0.5056
Pt    0.1638    0.0789    0.4630
Pt    0.1437    0.0547    0.4617
Pt    0.0076    0.0993    0.5053
Pt    0.1432    0.1867    0.4618
Pt    0.1439    0.2323    0.4608
Pt    0.2114    0.2111    0.5066
Pt    0.1658    0.0759    0.4174
Pt    0.1654    0.0559    0.4847
Pt    0.1664    0.0305    0.4610
Pt    0.1861    0.0526    0.4153
Pt    0.1878    0.0532    0.4611
Pt    0.1643    0.0510    0.4373
Pt    0.1877    0.0986    0.4154
Pt    0.1877    0.0990    0.4598
Pt    0.2328    0.2344    0.5062
Pt    0.1873    0.1428    0.4595
Pt    0.1000    0.0093    0.5071
Pt    0.1863    0.1889    0.4156
Pt    0.1879    0.1855    0.4616
Pt    0.0767    0.2106    0.4620
Pt    0.1879    0.2316    0.4118
Pt    0.1884    0.2330    0.4602
Pt    0.0772    0.1645    0.4605
Pt    0.0298    0.2102    0.4136
Pt    0.2108    0.0992    0.4846
Pt    0.2103    0.1848    0.3935
Pt    0.2328    0.0530    0.4171
Pt    0.2340    0.0537    0.4622
Pt    0.0074    0.2094    0.4364
Pt    0.2345    0.0994    0.4608
Pt    0.2094    0.1417    0.4838
Pt    0.2332    0.1427    0.4617
Pt    0.2117    0.1431    0.4378
Pt    0.2355    0.1854    0.4142
Pt    0.2341    0.1884    0.4617
Pt    0.2130    0.1009    0.4358
Pt    0.2334    0.2347    0.4145
Pt    0.2336    0.2330    0.4607
Pt    0.1198    0.2331    0.4847
Pt    0.0523    0.2566    0.4837
Pt    0.2121    0.0539    0.4844
Pt    0.0774    0.1680    0.4145
Pt    0.1648    0.1853    0.4851
Pt    0.2106    0.2093    0.4605
Pt    0.2115    0.2103    0.4148
Pt    0.0294    0.2112    0.4593
Pt    0.2110    0.1653    0.4612
Pt    0.0785    0.2131    0.4156
Pt    0.2096    0.1196    0.4609
Pt    0.2110    0.0534    0.4395
Pt    0.2122    0.0780    0.4604
Pt    0.2085    0.0753    0.4170
Pt    0.1211    0.2316    0.4377
Pt    0.2117    0.0302    0.4625
Pt    0.0541    0.0302    0.3937
Pt    0.0530    0.0297    0.4398
Pt    0.0530    0.0293    0.4847
Pt    0.0523    0.0757    0.3945
Pt    0.0531    0.0760    0.4377
Pt    0.0535    0.0771    0.4846
Pt    0.0539    0.1193    0.4373
Pt    0.0555    0.1227    0.4837
Pt    0.0534    0.1654    0.4374
Pt    0.0534    0.1631    0.4831
Pt    0.0540    0.2120    0.3933
Pt    0.0520    0.2115    0.4367
Pt    0.0523    0.2091    0.4845
Pt    0.1214    0.1889    0.4387
Pt    0.1642    0.1844    0.4388
Pt    0.0305    0.1639    0.4594
Pt    0.0995    0.0305    0.4367
Pt    0.1000    0.0326    0.4832
Pt    0.0976    0.0746    0.4369
Pt    0.0995    0.0773    0.4848
Pt    0.0979    0.1683    0.4375
Pt    0.0981    0.2105    0.4398
Pt    0.0986    0.2091    0.4849
Pt    0.2110    0.2336    0.4832
Pt    0.0309    0.1232    0.4605
Pt    0.1436    0.0317    0.4842
Pt    0.1423    0.0754    0.4395
Pt    0.1444    0.2101    0.4354
Pt    0.1442    0.2085    0.4851
Pt    0.2101    0.2340    0.4379
Pt    0.1668    0.0988    0.4388
Pt    0.1863    0.0293    0.3930
Pt    0.1881    0.0293    0.4368
Pt    0.1888    0.0303    0.4843
Pt    0.1872    0.0767    0.3932
Pt    0.1880    0.0761    0.4405
Pt    0.1876    0.0782    0.4844
Pt    0.1886    0.1220    0.4358
Pt    0.1858    0.1205    0.4831
Pt    0.1891    0.1649    0.4371
Pt    0.1885    0.1640    0.4840
Pt    0.1875    0.2084    0.3915
Pt    0.1877    0.2111    0.4365
Pt    0.1877    0.2101    0.4836
Pt    0.2323    0.2560    0.4380
Pt    0.1657    0.2334    0.4842
Pt    0.2345    0.0300    0.3938
Pt    0.2343    0.0305    0.4393
Pt    0.2350    0.0293    0.4848
Pt    0.2337    0.0768    0.3950
Pt    0.2347    0.0763    0.4375
Pt    0.2357    0.0773    0.4849
Pt    0.2346    0.1202    0.4839
Pt    0.2337    0.1659    0.4382
Pt    0.2338    0.1659    0.4860
Pt    0.2329    0.2097    0.3929
Pt    0.2333    0.2107    0.4375
Pt    0.2331    0.2105    0.4843
Pt    0.0309    0.0766    0.4606
Pt    0.0302    0.0769    0.4158
Pt    0.2124    0.1883    0.4840
Pt    0.1224    0.2096    0.4632
Pt    0.1186    0.0780    0.4611
Pt    0.2099    0.2325    0.3919
Pt    0.0298    0.0549    0.3939
Pt    0.0298    0.0535    0.4388
Pt    0.0326    0.0538    0.4855
Pt    0.0310    0.0999    0.4367
Pt    0.0324    0.0998    0.4857
Pt    0.0304    0.1427    0.4341
Pt    0.0304    0.1432    0.4845
Pt    0.0284    0.1874    0.4364
Pt    0.0297    0.1886    0.4834
Pt    0.0304    0.2338    0.3931
Pt    0.0296    0.2338    0.4360
Pt    0.0315    0.2322    0.4838
Pt    0.1228    0.0304    0.4595
Pt    0.2110    0.1865    0.4358
Pt    0.2103    0.0527    0.3922
Pt    0.0777    0.0537    0.3928
Pt    0.0755    0.0521    0.4391
Pt    0.0767    0.0525    0.4848
Pt    0.0760    0.0982    0.4392
Pt    0.0783    0.0986    0.4829
Pt    0.0771    0.1444    0.4360
Pt    0.0776    0.1436    0.4832
Pt    0.0779    0.1916    0.3920
Pt    0.0742    0.1891    0.4377
Pt    0.0766    0.1840    0.4843
Pt    0.0767    0.2351    0.4366
Pt    0.0761    0.2334    0.4848
Pt    0.0292    0.0317    0.4624
Pt    0.1210    0.0529    0.4382
Pt    0.1239    0.0569    0.4852
Pt    0.1435    0.0074    0.4604
Pt    0.0290    0.0078    0.4395
Pt    0.2570    0.2108    0.4147
Pt    0.0992    0.2556    0.4371
Pt    0.2099    0.2570    0.4598
Pt    0.1416    0.2354    0.5073
Pt    0.1871    0.2544    0.4356
Pt    0.2568    0.1220    0.4600
Pt    0.2565    0.2337    0.4390
Pt    0.2565    0.2326    0.3927
Pt    0.1890    0.2333    0.5059
Pt    0.1636    0.2570    0.4592
Pt    0.2561    0.1872    0.3921
Pt    0.2565    0.2116    0.4617
Pt    0.1217    0.2552    0.4597
Pt    0.2570    0.1004    0.4375
Pt    0.2129    0.0309    0.5058
Pt    0.0088    0.0761    0.4841
Pt    0.2556    0.1882    0.4369
Pt    0.2561    0.1883    0.4847
Pt    0.2553    0.2557    0.4609
Pt    0.0094    0.1001    0.4603
Pt    0.2562    0.2335    0.4857
Pt    0.0299    0.2569    0.4593
Pt    0.0756    0.2571    0.4612
Pt    0.2568    0.0772    0.4619
Pt    0.2097    0.2570    0.4142
Pt    0.0304    0.2560    0.5073
Pt    0.2570    0.0560    0.4378
Pt    0.2560    0.1657    0.4613
Pt    0.2562    0.0540    0.3939
Pt    0.1423    0.2537    0.4342
Pt    0.0535    0.1866    0.5064
Pt    0.0087    0.0544    0.5067
Pt    0.0557    0.1432    0.5071
Pt    0.2560    0.0311    0.5072
Pt    0.1883    0.1865    0.5066
Pt    0.2571    0.1648    0.5069
Pt    0.1873    0.1432    0.5063
Pt    0.0303    0.1648    0.5067
Pt    0.2336    0.0992    0.5070
Pt    0.2339    0.1416    0.5069
Pt    0.0300    0.0771    0.5072
Pt    0.1429    0.2570    0.4831
Pt    0.0090    0.0071    0.4629
Pt    0.0316    0.1211    0.5073
Pt    0.0766    0.1643    0.5089
Pt    0.0323    0.0298    0.5998
Pt    0.0304    0.0294    0.5534
Pt    0.1423    0.0575    0.5079
Pt    0.0077    0.0774    0.5771
Pt    0.0545    0.0072    0.5078
Pt    0.0527    0.0072    0.5546
Pt    0.1428    0.0078    0.5551
Pt    0.0081    0.1199    0.5300
Pt    0.0786    0.0073    0.6218
Pt    0.0074    0.0532    0.5548
Pt    0.1211    0.2093    0.5528
Pt    0.0557    0.0535    0.5547
Pt    0.0539    0.0542    0.5992
Pt    0.0543    0.0994    0.5547
Pt    0.0535    0.1434    0.5531
Pt    0.0534    0.1875    0.5544
Pt    0.0525    0.1891    0.6012
Pt    0.0531    0.2338    0.5527
Pt    0.0539    0.2345    0.5987
Pt    0.1198    0.0762    0.5533
Pt    0.0983    0.0535    0.5550
Pt    0.1001    0.1880    0.5523
Pt    0.1000    0.1885    0.5998
Pt    0.0978    0.2340    0.5540
Pt    0.1224    0.0302    0.5563
Pt    0.1426    0.0535    0.5544
Pt    0.1436    0.1866    0.5535
Pt    0.1434    0.2331    0.5526
Pt    0.1227    0.0080    0.5322
Pt    0.2320    0.2566    0.5787
Pt    0.1870    0.0531    0.5526
Pt    0.1876    0.0522    0.5994
Pt    0.1883    0.0983    0.5534
Pt    0.1895    0.0971    0.5982
Pt    0.1861    0.1423    0.5539
Pt    0.1885    0.1887    0.5543
Pt    0.1874    0.1852    0.5994
Pt    0.1873    0.2331    0.5530
Pt    0.1863    0.2342    0.5994
Pt    0.0772    0.2114    0.5984
Pt    0.0768    0.2108    0.5524
Pt    0.2336    0.0519    0.5518
Pt    0.2339    0.0515    0.5995
Pt    0.2343    0.0994    0.5537
Pt    0.2338    0.1427    0.5562
Pt    0.2343    0.1880    0.5524
Pt    0.2333    0.1870    0.6002
Pt    0.2337    0.2343    0.5536
Pt    0.2313    0.2336    0.5995
Pt    0.1646    0.2093    0.5074
Pt    0.0083    0.0768    0.5296
Pt    0.2093    0.2108    0.5991
Pt    0.2123    0.2098    0.5527
Pt    0.2103    0.1658    0.5556
Pt    0.2110    0.1212    0.5552
Pt    0.2106    0.0731    0.5993
Pt    0.2108    0.0763    0.5526
Pt    0.2095    0.0284    0.5980
Pt    0.2099    0.0300    0.5528
Pt    0.0074    0.0538    0.5987
Pt    0.1647    0.2107    0.5549
Pt    0.1657    0.0763    0.5979
Pt    0.1644    0.0754    0.5529
Pt    0.1651    0.0313    0.5548
Pt    0.0545    0.0306    0.5318
Pt    0.0542    0.0298    0.5775
Pt    0.0547    0.0316    0.6209
Pt    0.0545    0.0770    0.5314
Pt    0.0542    0.0757    0.5772
Pt    0.0543    0.0777    0.6195
Pt    0.0551    0.1213    0.5307
Pt    0.0554    0.1228    0.5769
Pt    0.0523    0.1652    0.5311
Pt    0.0519    0.1662    0.5781
Pt    0.0527    0.2103    0.5305
Pt    0.0529    0.2114    0.5771
Pt    0.0541    0.2129    0.6220
Pt    0.0091    0.0309    0.6228
Pt    0.0076    0.1436    0.5086
Pt    0.2564    0.2560    0.5989
Pt    0.0998    0.0300    0.5324
Pt    0.1009    0.0300    0.5780
Pt    0.1004    0.0771    0.5288
Pt    0.0990    0.0792    0.5777
Pt    0.0998    0.1680    0.5774
Pt    0.0994    0.2098    0.5295
Pt    0.1013    0.2102    0.5764
Pt    0.0753    0.2567    0.5077
Pt    0.2340    0.0545    0.5080
Pt    0.1447    0.0305    0.5311
Pt    0.1430    0.0762    0.5761
Pt    0.1429    0.2088    0.5295
Pt    0.1428    0.2114    0.5764
Pt    0.1223    0.0316    0.5074
Pt    0.0081    0.2558    0.5756
Pt    0.1874    0.0300    0.5311
Pt    0.1878    0.0299    0.5764
Pt    0.1866    0.0286    0.6209
Pt    0.1884    0.0764    0.5293
Pt    0.1885    0.0740    0.5752
Pt    0.1878    0.0750    0.6216
Pt    0.1879    0.1206    0.5301
Pt    0.1895    0.1190    0.5782
Pt    0.1873    0.1650    0.5313
Pt    0.1874    0.1660    0.5761
Pt    0.1874    0.2104    0.5300
Pt    0.1865    0.2119    0.5770
Pt    0.1863    0.2091    0.6193
Pt    0.2106    0.1640    0.5079
Pt    0.0076    0.2085    0.6224
Pt    0.2326    0.0285    0.5303
Pt    0.2335    0.0287    0.5748
Pt    0.2324    0.0280    0.6215
Pt    0.2335    0.0768    0.5290
Pt    0.2339    0.0740    0.5752
Pt    0.2337    0.0741    0.6210
Pt    0.2334    0.1214    0.5312
Pt    0.2344    0.1639    0.5306
Pt    0.2349    0.1669    0.5770
Pt    0.2342    0.2112    0.5297
Pt    0.2334    0.2109    0.5772
Pt    0.2329    0.2100    0.6218
Pt    0.0990    0.2565    0.5313
Pt    0.1648    0.2571    0.5531
Pt    0.2326    0.2562    0.5297
Pt    0.0767    0.1672    0.5992
Pt    0.0764    0.1656    0.5543
Pt    0.0787    0.1215    0.5556
Pt    0.0307    0.0523    0.5320
Pt    0.0302    0.0527    0.5765
Pt    0.0302    0.0551    0.6217
Pt    0.0328    0.0992    0.5315
Pt    0.0325    0.0994    0.5767
Pt    0.0293    0.1434    0.5313
Pt    0.0298    0.1433    0.5773
Pt    0.0289    0.1877    0.5320
Pt    0.0290    0.1891    0.5776
Pt    0.0302    0.2335    0.5284
Pt    0.0315    0.2347    0.5754
Pt    0.0304    0.2341    0.6207
Pt    0.0768    0.0768    0.5994
Pt    0.0775    0.0769    0.5536
Pt    0.0772    0.0302    0.6006
Pt    0.0767    0.0532    0.5303
Pt    0.0772    0.0532    0.5784
Pt    0.0797    0.0545    0.6220
Pt    0.0784    0.0993    0.5324
Pt    0.0759    0.0995    0.5771
Pt    0.0789    0.1419    0.5317
Pt    0.0773    0.1451    0.5779
Pt    0.0762    0.1878    0.5312
Pt    0.0768    0.1894    0.5765
Pt    0.0767    0.1873    0.6210
Pt    0.0767    0.2336    0.5305
Pt    0.0776    0.2339    0.5770
Pt    0.0779    0.0290    0.5563
Pt    0.1210    0.0535    0.5318
Pt    0.1191    0.0546    0.5767
Pt    0.1231    0.1877    0.5758
Pt    0.1211    0.2330    0.5311
Pt    0.1218    0.2338    0.5761
Pt    0.1875    0.2566    0.5770
Pt    0.2108    0.2558    0.5556
Pt    0.1651    0.0538    0.5291
Pt    0.1643    0.0533    0.5788
Pt    0.1663    0.0967    0.5738
Pt    0.1660    0.1883    0.5299
Pt    0.1652    0.1880    0.5758
Pt    0.1650    0.2343    0.5298
Pt    0.1646    0.2351    0.5778
Pt    0.0287    0.2109    0.5994
Pt    0.0309    0.2098    0.5540
Pt    0.0299    0.1649    0.5547
Pt    0.2106    0.0533    0.5301
Pt    0.2102    0.0524    0.5763
Pt    0.2094    0.0515    0.6222
Pt    0.2110    0.0989    0.5289
Pt    0.2132    0.0974    0.5777
Pt    0.2109    0.1447    0.5327
Pt    0.2080    0.1427    0.5791
Pt    0.2102    0.1869    0.5295
Pt    0.2109    0.1874    0.5782
Pt    0.2107    0.1872    0.6211
Pt    0.2104    0.2344    0.5312
Pt    0.2094    0.2333    0.5763
Pt    0.2074    0.2335    0.6211
Pt    0.0309    0.1209    0.5537
Pt    0.0314    0.0772    0.5993
Pt    0.0298    0.0744    0.5536
Pt    0.0080    0.2330    0.5517
Pt    0.0966    0.1871    0.5081
Pt    0.1874    0.0981    0.5079
Pt    0.2310    0.2568    0.6216
Pt    0.1007    0.0541    0.5075
Pt    0.2336    0.1867    0.5086
Pt    0.0775    0.0761    0.5076
Pt    0.1208    0.2554    0.5535
Pt    0.2566    0.0761    0.5556
Pt    0.0988    0.2571    0.5783
Pt    0.2567    0.2099    0.5075
Pt    0.0541    0.0539    0.5080
Pt    0.0758    0.0075    0.5316
Pt    0.2565    0.1203    0.5092
Pt    0.0078    0.2338    0.5984
Pt    0.2569    0.2108    0.5530
Pt    0.0542    0.2564    0.5766
Pt    0.2567    0.0744    0.5994
Pt    0.2559    0.0988    0.5795
Pt    0.2565    0.0286    0.5995
Pt    0.0564    0.1001    0.5076
Pt    0.2567    0.1892    0.5754
Pt    0.2565    0.0501    0.5763
Pt    0.0091    0.2569    0.6222
Pt    0.0533    0.2568    0.5290
Pt    0.2569    0.2095    0.6001
Pt    0.0763    0.0300    0.5081
Pt    0.0098    0.2563    0.5305
Pt    0.2568    0.1858    0.6218
Pt    0.2564    0.0284    0.5515
Pt    0.2571    0.2332    0.6215
Pt    0.0082    0.0282    0.5773
Pt    0.0298    0.0298    0.5094
Pt    0.0768    0.2565    0.6005
Pt    0.0303    0.2109    0.5087
Pt    0.1652    0.0312    0.5078
Pt    0.2108    0.1211    0.5077
Pt    0.0982    0.2316    0.5078
Pt    0.1645    0.0775    0.5074
Pt    0.0531    0.2327    0.5082
Pt    0.0808    0.1216    0.5076
Pt    0.1443    0.0072    0.5076
Pt    0.1870    0.0073    0.5081
Pt    0.1894    0.1640    0.7568
Pt    0.0090    0.1643    0.7086
Pt    0.0543    0.0305    0.7567
Pt    0.0317    0.0078    0.7565
Pt    0.1649    0.0083    0.7101
Pt    0.0757    0.0085    0.6652
Pt    0.0986    0.2564    0.7562
Pt    0.0083    0.1202    0.7092
Pt    0.0083    0.1878    0.7332
Pt    0.2349    0.0298    0.7565
Pt    0.2344    0.0759    0.7560
Pt    0.0994    0.0305    0.7573
Pt    0.1431    0.2560    0.7093
Pt    0.1008    0.0770    0.7568
Pt    0.2118    0.1873    0.7559
Pt    0.2104    0.0740    0.7334
Pt    0.2115    0.0767    0.6873
Pt    0.2112    0.0763    0.6441
Pt    0.0536    0.0543    0.6425
Pt    0.0524    0.0535    0.6875
Pt    0.0529    0.0536    0.7347
Pt    0.0552    0.0985    0.6859
Pt    0.0533    0.0985    0.7335
Pt    0.0537    0.1414    0.6864
Pt    0.0524    0.1431    0.7344
Pt    0.0545    0.1872    0.6435
Pt    0.0524    0.1870    0.6868
Pt    0.0535    0.1887    0.7366
Pt    0.0534    0.2339    0.6443
Pt    0.0540    0.2344    0.6869
Pt    0.0518    0.2338    0.7342
Pt    0.2100    0.0287    0.7333
Pt    0.2105    0.0280    0.6875
Pt    0.1000    0.0522    0.6868
Pt    0.0992    0.0521    0.7328
Pt    0.0998    0.0975    0.6896
Pt    0.0972    0.1863    0.6886
Pt    0.0970    0.1868    0.7356
Pt    0.0998    0.2336    0.6841
Pt    0.0995    0.2331    0.7341
Pt    0.2096    0.0281    0.6433
Pt    0.1466    0.0545    0.6843
Pt    0.1426    0.0537    0.7336
Pt    0.1424    0.1873    0.6880
Pt    0.1441    0.1867    0.7322
Pt    0.1438    0.2322    0.6865
Pt    0.1426    0.2336    0.7318
Pt    0.0755    0.2115    0.6435
Pt    0.0745    0.1647    0.7336
Pt    0.1655    0.2091    0.7332
Pt    0.1853    0.0531    0.6454
Pt    0.1884    0.0513    0.6876
Pt    0.1878    0.0522    0.7333
Pt    0.1892    0.0977    0.6900
Pt    0.1878    0.0967    0.7347
Pt    0.1895    0.1416    0.6875
Pt    0.1877    0.1876    0.6426
Pt    0.1881    0.1892    0.6871
Pt    0.1884    0.1860    0.7339
Pt    0.1884    0.2338    0.6867
Pt    0.1895    0.2321    0.7344
Pt    0.1655    0.2112    0.6888
Pt    0.1653    0.1628    0.6881
Pt    0.1662    0.0762    0.7332
Pt    0.2338    0.0529    0.6434
Pt    0.2343    0.0505    0.6887
Pt    0.2336    0.0525    0.7341
Pt    0.2361    0.0980    0.6894
Pt    0.2346    0.0979    0.7334
Pt    0.2340    0.1425    0.7339
Pt    0.2336    0.1876    0.6423
Pt    0.2339    0.1868    0.6885
Pt    0.2366    0.1850    0.7336
Pt    0.2336    0.2341    0.6435
Pt    0.2334    0.2341    0.6867
Pt    0.2347    0.2331    0.7341
Pt    0.1211    0.1867    0.7554
Pt    0.0753    0.1651    0.6879
Pt    0.2563    0.0518    0.7115
Pt    0.2123    0.2094    0.7330
Pt    0.2105    0.2112    0.6869
Pt    0.2092    0.2102    0.6415
Pt    0.2108    0.1646    0.7335
Pt    0.2145    0.1619    0.6851
Pt    0.2117    0.1201    0.7350
Pt    0.2115    0.1190    0.6905
Pt    0.0529    0.0305    0.6667
Pt    0.0536    0.0297    0.7101
Pt    0.0519    0.0750    0.6645
Pt    0.0531    0.0760    0.7114
Pt    0.0564    0.1201    0.7102
Pt    0.0527    0.1656    0.7097
Pt    0.0527    0.2090    0.6654
Pt    0.0528    0.2102    0.7107
Pt    0.1874    0.2568    0.6631
Pt    0.1649    0.0543    0.7558
Pt    0.0984    0.0290    0.7110
Pt    0.0984    0.0763    0.6657
Pt    0.0998    0.0754    0.7104
Pt    0.0985    0.2097    0.7101
Pt    0.0075    0.1661    0.7562
Pt    0.1437    0.0287    0.7097
Pt    0.1431    0.0769    0.7118
Pt    0.1422    0.2104    0.7103
Pt    0.0796    0.1199    0.6905
Pt    0.1860    0.0275    0.6641
Pt    0.1885    0.0306    0.7104
Pt    0.1878    0.0748    0.6666
Pt    0.1873    0.0751    0.7111
Pt    0.1882    0.1190    0.7119
Pt    0.1890    0.1659    0.6664
Pt    0.1900    0.1651    0.7083
Pt    0.1859    0.2131    0.6625
Pt    0.1883    0.2103    0.7109
Pt    0.0768    0.0739    0.7351
Pt    0.0526    0.2553    0.7093
Pt    0.2332    0.0278    0.6662
Pt    0.2336    0.0271    0.7106
Pt    0.2339    0.0755    0.6670
Pt    0.2344    0.0747    0.7110
Pt    0.2365    0.1204    0.7111
Pt    0.2350    0.1651    0.7103
Pt    0.2340    0.2109    0.6657
Pt    0.2355    0.2097    0.7113
Pt    0.1883    0.2094    0.7554
Pt    0.0085    0.2331    0.6875
Pt    0.1652    0.0775    0.6891
Pt    0.1656    0.0295    0.7334
Pt    0.0299    0.0528    0.6652
Pt    0.0296    0.0527    0.7110
Pt    0.0318    0.0996    0.7096
Pt    0.0311    0.1418    0.7090
Pt    0.0289    0.1864    0.6634
Pt    0.0311    0.1882    0.7107
Pt    0.0304    0.2338    0.6649
Pt    0.0307    0.2330    0.7102
Pt    0.1651    0.0291    0.6866
Pt    0.1432    0.0761    0.7559
Pt    0.0756    0.0541    0.6651
Pt    0.0761    0.0518    0.7108
Pt    0.0780    0.0983    0.6666
Pt    0.0780    0.0971    0.7131
Pt    0.0759    0.1446    0.7111
Pt    0.0770    0.1881    0.6660
Pt    0.0752    0.1869    0.7103
Pt    0.0776    0.2341    0.6641
Pt    0.0765    0.2337    0.7103
Pt    0.0766    0.0758    0.6899
Pt    0.1225    0.0526    0.7091
Pt    0.1194    0.1857    0.7114
Pt    0.1197    0.2344    0.7099
Pt    0.1205    0.2094    0.7330
Pt    0.1638    0.0522    0.7099
Pt    0.1640    0.1897    0.6662
Pt    0.1660    0.1850    0.7085
Pt    0.1675    0.2355    0.7122
Pt    0.1201    0.2097    0.6867
Pt    0.1214    0.0784    0.7331
Pt    0.2108    0.0512    0.6651
Pt    0.2114    0.0516    0.7109
Pt    0.2114    0.0971    0.7131
Pt    0.2117    0.1416    0.7115
Pt    0.2108    0.1879    0.6653
Pt    0.2109    0.1862    0.7100
Pt    0.2089    0.2343    0.6634
Pt    0.2125    0.2328    0.7105
Pt    0.1217    0.0746    0.6873
Pt    0.1225    0.0299    0.7326
Pt    0.0299    0.0536    0.7572
Pt    0.0743    0.0778    0.6438
Pt    0.2567    0.0288    0.6441
Pt    0.0290    0.2356    0.7558
Pt    0.0303    0.2569    0.7324
Pt    0.0780    0.0305    0.6875
Pt    0.0758    0.2111    0.7336
Pt    0.0757    0.0299    0.7350
Pt    0.0310    0.0307    0.6421
Pt    0.0297    0.0296    0.6886
Pt    0.0290    0.0305    0.7339
Pt    0.0293    0.0772    0.6876
Pt    0.0306    0.0760    0.7326
Pt    0.0306    0.1211    0.6861
Pt    0.0299    0.1210    0.7325
Pt    0.0311    0.1642    0.6849
Pt    0.0311    0.1665    0.7327
Pt    0.0308    0.2111    0.6423
Pt    0.0309    0.2100    0.6874
Pt    0.0300    0.2107    0.7349
Pt    0.2344    0.2549    0.7571
Pt    0.0766    0.2113    0.6872
Pt    0.0078    0.0767    0.7571
Pt    0.0790    0.0306    0.6439
Pt    0.0752    0.2553    0.7328
Pt    0.1659    0.2562    0.6852
Pt    0.2354    0.2555    0.7112
Pt    0.0520    0.0753    0.7565
Pt    0.2569    0.2563    0.7349
Pt    0.2563    0.0517    0.6652
Pt    0.2565    0.2106    0.6439
Pt    0.1897    0.2549    0.7568
Pt    0.0074    0.2102    0.6654
Pt    0.1435    0.2108    0.7560
Pt    0.2116    0.2562    0.7323
Pt    0.0303    0.1873    0.7572
Pt    0.0549    0.0090    0.6426
Pt    0.1661    0.2326    0.7554
Pt    0.0761    0.0976    0.7550
Pt    0.2571    0.0756    0.6444
Pt    0.0081    0.1861    0.6862
Pt    0.1656    0.1862    0.7554
Pt    0.2356    0.2095    0.7549
Pt    0.0533    0.1209    0.7562
Pt    0.2347    0.1202    0.7566
Pt    0.0308    0.1435    0.7566
Pt    0.2113    0.1002    0.7570
Pt    0.2117    0.0074    0.7571
Pt    0.1435    0.2566    0.7547
Pt    0.2341    0.1645    0.7559
Pt    0.0301    0.0994    0.7561
Pt    0.1207    0.0072    0.7561
Pt    0.0759    0.2326    0.7573
Pt    0.0521    0.0078    0.8703
Pt    0.1651    0.2340    0.8036
Pt    0.1661    0.1872    0.8465
Pt    0.1641    0.1870    0.8030
Pt    0.0784    0.1657    0.7812
Pt    0.0105    0.2332    0.8718
Pt    0.1655    0.0530    0.8034
Pt    0.0763    0.0075    0.8022
Pt    0.0988    0.0072    0.7818
Pt    0.0316    0.0075    0.8019
Pt    0.0771    0.1215    0.8257
Pt    0.0764    0.1643    0.8277
Pt    0.0538    0.2109    0.7581
Pt    0.1212    0.2558    0.7800
Pt    0.0755    0.2104    0.7825
Pt    0.0074    0.0557    0.8723
Pt    0.0079    0.2346    0.8270
Pt    0.1648    0.2112    0.8257
Pt    0.0543    0.0522    0.7801
Pt    0.0547    0.0535    0.8275
Pt    0.0535    0.0543    0.8713
Pt    0.0528    0.0980    0.7798
Pt    0.0545    0.0984    0.8264
Pt    0.0556    0.1429    0.7800
Pt    0.0528    0.1415    0.8256
Pt    0.0534    0.1873    0.7810
Pt    0.0520    0.1856    0.8272
Pt    0.0524    0.1868    0.8720
Pt    0.0534    0.2335    0.7810
Pt    0.0526    0.2325    0.8254
Pt    0.0563    0.2342    0.8730
Pt    0.1640    0.2101    0.7792
Pt    0.1665    0.1647    0.8242
Pt    0.0985    0.0537    0.7812
Pt    0.0995    0.0517    0.8272
Pt    0.0997    0.0984    0.8253
Pt    0.0992    0.1865    0.7784
Pt    0.0983    0.1872    0.8279
Pt    0.0989    0.2330    0.7814
Pt    0.0982    0.2332    0.8279
Pt    0.1635    0.0751    0.8285
Pt    0.1448    0.0535    0.7806
Pt    0.1444    0.0519    0.8275
Pt    0.1431    0.1847    0.7800
Pt    0.1420    0.1858    0.8266
Pt    0.1440    0.2342    0.7792
Pt    0.1435    0.2339    0.8276
Pt    0.1646    0.0776    0.7804
Pt    0.1667    0.0300    0.8265
Pt    0.1658    0.0289    0.7811
Pt    0.1879    0.0538    0.7797
Pt    0.1875    0.0536    0.8257
Pt    0.1876    0.0540    0.8717
Pt    0.1880    0.0994    0.7799
Pt    0.1855    0.0992    0.8279
Pt    0.1866    0.1435    0.8248
Pt    0.1866    0.1870    0.7793
Pt    0.1883    0.1865    0.8233
Pt    0.1891    0.1863    0.8702
Pt    0.1876    0.2322    0.7803
Pt    0.1880    0.2347    0.8253
Pt    0.1879    0.0073    0.7811
Pt    0.0075    0.1424    0.8263
Pt    0.1218    0.2108    0.8271
Pt    0.2360    0.0548    0.7790
Pt    0.2326    0.0531    0.8264
Pt    0.2347    0.0569    0.8715
Pt    0.2345    0.0972    0.7801
Pt    0.2321    0.0993    0.8256
Pt    0.2342    0.1421    0.7794
Pt    0.2340    0.1853    0.7807
Pt    0.2328    0.1868    0.8253
Pt    0.2341    0.1866    0.8707
Pt    0.2352    0.2329    0.7808
Pt    0.2337    0.2321    0.8247
Pt    0.2322    0.2324    0.8709
Pt    0.1865    0.0074    0.8724
Pt    0.0079    0.1207    0.8034
Pt    0.0538    0.1650    0.7580
Pt    0.2099    0.2088    0.8700
Pt    0.2095    0.2092    0.8240
Pt    0.2118    0.2097    0.7800
Pt    0.2111    0.1628    0.8265
Pt    0.2107    0.1646    0.7790
Pt    0.2081    0.1200    0.8253
Pt    0.2111    0.1204    0.7812
Pt    0.2119    0.0789    0.8732
Pt    0.2083    0.0768    0.8246
Pt    0.2126    0.0761    0.7801
Pt    0.2088    0.0300    0.8726
Pt    0.2113    0.0301    0.8262
Pt    0.2134    0.0311    0.7797
Pt    0.0770    0.0285    0.8285
Pt    0.0539    0.0309    0.8048
Pt    0.0520    0.0303    0.8486
Pt    0.0769    0.0304    0.7805
Pt    0.0545    0.0749    0.8037
Pt    0.0547    0.0761    0.8492
Pt    0.0081    0.0315    0.8479
Pt    0.0522    0.1189    0.8035
Pt    0.0298    0.2555    0.8258
Pt    0.0520    0.1638    0.8034
Pt    0.0285    0.2565    0.7800
Pt    0.0516    0.2103    0.8041
Pt    0.0535    0.2093    0.8503
Pt    0.0312    0.2098    0.8709
Pt    0.2556    0.0533    0.8484
Pt    0.0080    0.2108    0.8045
Pt    0.0307    0.2088    0.8280
Pt    0.0994    0.0310    0.8054
Pt    0.0296    0.2116    0.7790
Pt    0.0991    0.0770    0.8025
Pt    0.0981    0.0748    0.8500
Pt    0.0298    0.1636    0.8269
Pt    0.0994    0.2096    0.8050
Pt    0.0301    0.1655    0.7803
Pt    0.1224    0.0545    0.8027
Pt    0.0303    0.1189    0.8260
Pt    0.1427    0.0294    0.8056
Pt    0.0306    0.1209    0.7794
Pt    0.1433    0.0776    0.8037
Pt    0.0289    0.0753    0.8273
Pt    0.1430    0.2091    0.8033
Pt    0.0316    0.0753    0.7797
Pt    0.2100    0.0538    0.8497
Pt    0.0300    0.0313    0.8723
Pt    0.1900    0.0311    0.8030
Pt    0.1879    0.0292    0.8489
Pt    0.0304    0.0303    0.8258
Pt    0.1860    0.0771    0.8031
Pt    0.1876    0.0756    0.8490
Pt    0.1867    0.1199    0.8032
Pt    0.0313    0.0291    0.7797
Pt    0.1854    0.1639    0.7992
Pt    0.1882    0.1650    0.8473
Pt    0.1660    0.2552    0.7798
Pt    0.1865    0.2104    0.8021
Pt    0.1890    0.2115    0.8480
Pt    0.0325    0.2564    0.8715
Pt    0.1217    0.2547    0.8299
Pt    0.0767    0.2095    0.8282
Pt    0.1217    0.2326    0.8046
Pt    0.2342    0.0310    0.8032
Pt    0.2329    0.0307    0.8498
Pt    0.0772    0.0760    0.8728
Pt    0.2341    0.0752    0.8040
Pt    0.2319    0.0769    0.8482
Pt    0.0080    0.2565    0.8498
Pt    0.2341    0.1212    0.8035
Pt    0.1202    0.1847    0.8021
Pt    0.2324    0.1622    0.8031
Pt    0.2565    0.2100    0.8703
Pt    0.2355    0.2086    0.8038
Pt    0.2325    0.2110    0.8481
Pt    0.2112    0.0539    0.8022
Pt    0.0788    0.2092    0.8712
Pt    0.2117    0.2557    0.8249
Pt    0.1211    0.2088    0.7809
Pt    0.1207    0.0751    0.8265
Pt    0.1231    0.0777    0.7803
Pt    0.0779    0.0303    0.8709
Pt    0.0296    0.0527    0.8024
Pt    0.0297    0.0551    0.8506
Pt    0.0768    0.0763    0.7796
Pt    0.0304    0.0954    0.8038
Pt    0.0767    0.0761    0.8274
Pt    0.0294    0.1426    0.8019
Pt    0.2094    0.2342    0.8475
Pt    0.0288    0.1877    0.8020
Pt    0.0284    0.1862    0.8503
Pt    0.2099    0.2314    0.8025
Pt    0.0290    0.2333    0.8017
Pt    0.0319    0.2330    0.8482
Pt    0.1206    0.0285    0.7810
Pt    0.2562    0.0986    0.8044
Pt    0.0750    0.2334    0.8494
Pt    0.2115    0.1862    0.8470
Pt    0.0759    0.0537    0.8039
Pt    0.0773    0.0517    0.8491
Pt    0.2105    0.1867    0.8006
Pt    0.0789    0.1021    0.8007
Pt    0.0774    0.0985    0.8485
Pt    0.0765    0.1444    0.8040
Pt    0.2101    0.1421    0.8025
Pt    0.0762    0.1872    0.8044
Pt    0.0745    0.1860    0.8500
Pt    0.2114    0.0976    0.8033
Pt    0.0756    0.2325    0.8047
Pt    0.2552    0.2322    0.8480
Pt    0.0768    0.2550    0.8275
Pt    0.2105    0.0542    0.7575
Pt    0.0525    0.2558    0.8035
Pt    0.2549    0.0302    0.8261
Pt    0.2566    0.0082    0.8497
Pt    0.0537    0.2566    0.8495
Pt    0.2553    0.1861    0.8492
Pt    0.2106    0.2565    0.7798
Pt    0.2348    0.2566    0.8027
Pt    0.0775    0.2556    0.7804
Pt    0.0770    0.1871    0.7591
Pt    0.1425    0.2564    0.8045
Pt    0.2566    0.0313    0.8719
Pt    0.1876    0.2568    0.8030
Pt    0.2571    0.0787    0.8709
Pt    0.1003    0.2554    0.8046
Pt    0.2557    0.0781    0.8293
Pt    0.2337    0.2570    0.8476
Pt    0.2560    0.1646    0.8271
Pt    0.2123    0.2325    0.7577
Pt    0.0763    0.0532    0.7578
Pt    0.0985    0.2088    0.7579
Pt    0.1199    0.2327    0.7577
Pt    0.2114    0.1414    0.7578
Pt    0.1886    0.0762    0.7583
Pt    0.1207    0.0526    0.7574
Pt    0.0536    0.2562    0.7584
Pt    0.1436    0.0307    0.7578
Pt    0.1887    0.0302    0.7574
Pt    0.2359    0.0082    0.9168
Pt    0.0075    0.2094    0.9357
Pt    0.0084    0.1657    0.9369
Pt    0.0080    0.2332    0.9591
Pt    0.0764    0.0073    0.9385
Pt    0.1648    0.0076    0.9384
Pt    0.0074    0.0302    0.9850
Pt    0.0307    0.0074    0.8923
Pt    0.1007    0.1858    0.0071
Pt    0.0313    0.0075    0.9851
Pt    0.0075    0.2335    0.9159
Pt    0.1211    0.2099    0.9599
Pt    0.0543    0.0547    0.9163
Pt    0.0542    0.0546    0.9617
Pt    0.0541    0.0984    0.9620
Pt    0.0526    0.1414    0.9619
Pt    0.0535    0.1869    0.9138
Pt    0.0551    0.1877    0.9616
Pt    0.0555    0.2345    0.9170
Pt    0.0536    0.2335    0.9599
Pt    0.1202    0.0787    0.9613
Pt    0.0998    0.0528    0.9640
Pt    0.0988    0.1884    0.9160
Pt    0.0996    0.1865    0.9616
Pt    0.1013    0.2344    0.9600
Pt    0.1200    0.0305    0.9604
Pt    0.1426    0.0532    0.9620
Pt    0.1433    0.1867    0.9615
Pt    0.1436    0.2343    0.9599
Pt    0.0080    0.2333    0.0065
Pt    0.0089    0.1649    0.9842
Pt    0.1884    0.0528    0.9163
Pt    0.1897    0.0539    0.9615
Pt    0.1877    0.0970    0.9163
Pt    0.1874    0.0978    0.9618
Pt    0.1882    0.1431    0.9597
Pt    0.1892    0.1879    0.9164
Pt    0.1876    0.1885    0.9606
Pt    0.1881    0.2341    0.9161
Pt    0.1870    0.2341    0.9621
Pt    0.0777    0.2120    0.9615
Pt    0.0784    0.2114    0.9144
Pt    0.2330    0.0539    0.9162
Pt    0.2344    0.0537    0.9600
Pt    0.2348    0.1001    0.9590
Pt    0.2362    0.1422    0.9591
Pt    0.2345    0.1870    0.9148
Pt    0.2343    0.1873    0.9596
Pt    0.2367    0.2344    0.9145
Pt    0.2352    0.2342    0.9600
Pt    0.0078    0.0305    0.9377
Pt    0.0086    0.0763    0.9389
Pt    0.2125    0.2106    0.9605
Pt    0.2132    0.2107    0.9152
Pt    0.2112    0.1661    0.9614
Pt    0.2124    0.1216    0.9602
Pt    0.2113    0.0769    0.9612
Pt    0.2118    0.0777    0.9166
Pt    0.2107    0.0301    0.9607
Pt    0.2088    0.0291    0.9156
Pt    0.0297    0.2567    0.0052
Pt    0.1661    0.2120    0.9606
Pt    0.1656    0.0749    0.9618
Pt    0.1658    0.0767    0.9162
Pt    0.1653    0.0323    0.9610
Pt    0.0535    0.0302    0.8932
Pt    0.0545    0.0307    0.9376
Pt    0.0534    0.0290    0.9851
Pt    0.0526    0.0763    0.8946
Pt    0.0530    0.0769    0.9381
Pt    0.0535    0.0758    0.9850
Pt    0.0541    0.1191    0.9375
Pt    0.0527    0.1198    0.9850
Pt    0.0540    0.1649    0.9369
Pt    0.0525    0.1651    0.9839
Pt    0.0562    0.2116    0.8943
Pt    0.0549    0.2104    0.9375
Pt    0.0546    0.2117    0.9835
Pt    0.1651    0.0076    0.9826
Pt    0.0095    0.2563    0.9368
Pt    0.0552    0.2564    0.9381
Pt    0.0988    0.0287    0.9372
Pt    0.0992    0.0296    0.9854
Pt    0.0991    0.0766    0.9394
Pt    0.0995    0.0763    0.9863
Pt    0.0992    0.1641    0.9382
Pt    0.1001    0.2106    0.9365
Pt    0.0988    0.2092    0.9847
Pt    0.1423    0.0097    0.9583
Pt    0.2109    0.0087    0.9382
Pt    0.1427    0.0303    0.9851
Pt    0.1421    0.0760    0.9391
Pt    0.1444    0.2075    0.9354
Pt    0.1423    0.2096    0.9832
Pt    0.1873    0.2349    0.0059
Pt    0.0099    0.1856    0.9132
Pt    0.1854    0.0307    0.8926
Pt    0.1868    0.0303    0.9362
Pt    0.1889    0.0308    0.9841
Pt    0.1875    0.0773    0.8928
Pt    0.1883    0.0763    0.9394
Pt    0.1880    0.0773    0.9845
Pt    0.1891    0.1197    0.9378
Pt    0.1892    0.1219    0.9816
Pt    0.1900    0.1648    0.9374
Pt    0.1878    0.1675    0.9826
Pt    0.1893    0.2090    0.8931
Pt    0.1869    0.2113    0.9386
Pt    0.1901    0.2095    0.9831
Pt    0.0082    0.0088    0.9621
Pt    0.2125    0.0287    0.0073
Pt    0.2347    0.0312    0.8944
Pt    0.2340    0.0305    0.9380
Pt    0.2337    0.0295    0.9831
Pt    0.2340    0.0793    0.8957
Pt    0.2344    0.0766    0.9383
Pt    0.2342    0.0774    0.9826
Pt    0.2347    0.1216    0.9840
Pt    0.2334    0.1645    0.9359
Pt    0.2359    0.1645    0.9824
Pt    0.2332    0.2101    0.8921
Pt    0.2354    0.2098    0.9373
Pt    0.2343    0.2121    0.9840
Pt    0.1873    0.0088    0.9611
Pt    0.0078    0.1867    0.9593
Pt    0.2569    0.0999    0.9369
Pt    0.0762    0.1628    0.9619
Pt    0.0773    0.1658    0.9158
Pt    0.0776    0.1209    0.9610
Pt    0.0301    0.0550    0.8923
Pt    0.0303    0.0529    0.9383
Pt    0.0317    0.0519    0.9860
Pt    0.0308    0.0975    0.9385
Pt    0.0290    0.0975    0.9838
Pt    0.0300    0.1414    0.9351
Pt    0.0304    0.1409    0.9844
Pt    0.0312    0.1869    0.9382
Pt    0.0312    0.1879    0.9824
Pt    0.0323    0.2329    0.8949
Pt    0.0303    0.2330    0.9366
Pt    0.0313    0.2322    0.9829
Pt    0.0765    0.0755    0.9623
Pt    0.0757    0.0757    0.9150
Pt    0.0771    0.0297    0.9616
Pt    0.0787    0.0531    0.8941
Pt    0.0775    0.0531    0.9408
Pt    0.0772    0.0532    0.9848
Pt    0.0773    0.0988    0.9378
Pt    0.0784    0.0994    0.9859
Pt    0.0767    0.1413    0.9383
Pt    0.0777    0.1409    0.9844
Pt    0.0759    0.1875    0.8930
Pt    0.0771    0.1892    0.9386
Pt    0.0774    0.1871    0.9842
Pt    0.0782    0.2342    0.9381
Pt    0.0773    0.2341    0.9847
Pt    0.0777    0.0296    0.9144
Pt    0.1199    0.0546    0.9394
Pt    0.1223    0.0563    0.9863
Pt    0.1217    0.1869    0.9384
Pt    0.1231    0.2323    0.9356
Pt    0.1210    0.2316    0.9838
Pt    0.2569    0.1658    0.9594
Pt    0.0301    0.0315    0.9168
Pt    0.1639    0.0535    0.9380
Pt    0.1659    0.0538    0.9857
Pt    0.1637    0.0985    0.9406
Pt    0.1658    0.1860    0.9377
Pt    0.1654    0.1890    0.9849
Pt    0.1631    0.2345    0.9361
Pt    0.1654    0.2340    0.9839
Pt    0.0315    0.2099    0.9602
Pt    0.0309    0.2084    0.9144
Pt    0.0314    0.1637    0.9598
Pt    0.2112    0.0546    0.8928
Pt    0.2105    0.0546    0.9388
Pt    0.2115    0.0544    0.9847
Pt    0.2125    0.0996    0.9368
Pt    0.2123    0.0991    0.9849
Pt    0.2127    0.1413    0.9372
Pt    0.2122    0.1449    0.9845
Pt    0.2110    0.1858    0.8942
Pt    0.2110    0.1880    0.9387
Pt    0.2125    0.1873    0.9841
Pt    0.2089    0.2326    0.8917
Pt    0.2123    0.2331    0.9373
Pt    0.2123    0.2340    0.9831
Pt    0.0298    0.1198    0.9612
Pt    0.0318    0.0754    0.9617
Pt    0.0293    0.0775    0.9149
Pt    0.2570    0.0531    0.9382
Pt    0.2334    0.2555    0.8918
Pt    0.2569    0.0773    0.9605
Pt    0.1209    0.0077    0.9829
Pt    0.2559    0.0760    0.0060
Pt    0.0309    0.0305    0.9617
Pt    0.1669    0.2111    0.0065
Pt    0.0078    0.2079    0.8929
Pt    0.2570    0.0301    0.9614
Pt    0.0313    0.0093    0.9383
Pt    0.1016    0.2569    0.9370
Pt    0.0078    0.0079    0.9143
Pt    0.2570    0.0075    0.8927
Pt    0.0076    0.2107    0.9822
Pt    0.1882    0.1874    0.0068
Pt    0.2115    0.2553    0.0066
Pt    0.1003    0.2555    0.9838
Pt    0.2354    0.0522    0.0063
Pt    0.0536    0.2560    0.9844
Pt    0.2115    0.2564    0.9602
Pt    0.0802    0.2558    0.9155
Pt    0.1873    0.2570    0.9383
Pt    0.1221    0.2558    0.0067
Pt    0.0772    0.2114    0.0070
Pt    0.0755    0.2563    0.9618
Pt    0.0540    0.1435    0.0067
Pt    0.2570    0.0553    0.8946
Pt    0.1877    0.1433    0.0062
Pt    0.0304    0.2556    0.9624
Pt    0.0589    0.2565    0.8936
Pt    0.1877    0.2569    0.9837
Pt    0.0540    0.1880    0.0067
Pt    0.0769    0.2561    0.0063
Pt    0.1431    0.2334    0.0066
Pt    0.2347    0.1881    0.0061
Pt    0.0295    0.2093    0.0065
Pt    0.2109    0.0775    0.0066
Pt    0.2363    0.0073    0.0071
Pt    0.1443    0.0543    0.0066
Pt    0.2573    0.0313    0.9170
Pt    0.0538    0.0072    0.9606
Pt    0.2350    0.1001    0.0072
Pt    0.2336    0.2580    0.0761
Pt    0.0082    0.4619    0.0554
Pt    0.1644    0.4370    0.0981
Pt    0.0082    0.3933    0.0313
Pt    0.0083    0.4600    0.0990
Pt    0.1651    0.4363    0.0500
Pt    0.0088    0.3482    0.0759
Pt    0.1657    0.3035    0.0536
Pt    0.0083    0.3485    0.0316
Pt    0.1223    0.4837    0.0523
Pt    0.0315    0.4847    0.0088
Pt    0.2087    0.4616    0.1206
Pt    0.1202    0.4362    0.0502
Pt    0.2094    0.4851    0.0979
Pt    0.2111    0.4853    0.0536
Pt    0.1223    0.3022    0.0554
Pt    0.0805    0.4834    0.1007
Pt    0.0560    0.2793    0.0544
Pt    0.0535    0.2776    0.0999
Pt    0.0776    0.4859    0.0533
Pt    0.0535    0.3245    0.0541
Pt    0.0531    0.3273    0.0990
Pt    0.0767    0.4402    0.0976
Pt    0.0543    0.3719    0.0553
Pt    0.0772    0.4380    0.0526
Pt    0.0521    0.4159    0.0537
Pt    0.0769    0.3938    0.0537
Pt    0.0547    0.4615    0.0528
Pt    0.0566    0.4627    0.1002
Pt    0.0773    0.3485    0.0990
Pt    0.2104    0.5064    0.1206
Pt    0.0770    0.3942    0.0075
Pt    0.0781    0.3480    0.0522
Pt    0.1008    0.2791    0.0542
Pt    0.0764    0.3005    0.1005
Pt    0.1001    0.3246    0.0542
Pt    0.0983    0.3223    0.0988
Pt    0.0786    0.3004    0.0540
Pt    0.0994    0.4600    0.0530
Pt    0.0311    0.4850    0.0986
Pt    0.0314    0.3485    0.0096
Pt    0.0313    0.4831    0.0531
Pt    0.1448    0.2804    0.0544
Pt    0.1435    0.3260    0.0526
Pt    0.0329    0.4382    0.1005
Pt    0.1440    0.4600    0.0507
Pt    0.0313    0.4395    0.0548
Pt    0.0332    0.5067    0.1215
Pt    0.0311    0.3939    0.0562
Pt    0.1865    0.2779    0.0534
Pt    0.1884    0.2788    0.0979
Pt    0.0317    0.3483    0.0535
Pt    0.1886    0.3256    0.0533
Pt    0.1881    0.3249    0.0980
Pt    0.0309    0.3031    0.0996
Pt    0.1868    0.3697    0.0525
Pt    0.0317    0.3006    0.0545
Pt    0.1882    0.4156    0.0522
Pt    0.1900    0.4134    0.0986
Pt    0.2102    0.4614    0.0749
Pt    0.1851    0.4613    0.0525
Pt    0.1847    0.4611    0.0978
Pt    0.2117    0.4616    0.0314
Pt    0.0077    0.3726    0.0543
Pt    0.2560    0.4399    0.0953
Pt    0.0077    0.2787    0.0549
Pt    0.2343    0.2803    0.0531
Pt    0.2343    0.2804    0.0989
Pt    0.0079    0.3699    0.0096
Pt    0.2329    0.3267    0.0524
Pt    0.2346    0.3286    0.0993
Pt    0.2098    0.4146    0.0748
Pt    0.2332    0.3716    0.0534
Pt    0.2116    0.4154    0.0294
Pt    0.2336    0.4137    0.0529
Pt    0.2096    0.3706    0.0755
Pt    0.2354    0.4625    0.0528
Pt    0.2336    0.4625    0.0975
Pt    0.2096    0.3703    0.0289
Pt    0.2334    0.2583    0.0305
Pt    0.2573    0.4597    0.1195
Pt    0.2090    0.4377    0.0964
Pt    0.2116    0.4388    0.0521
Pt    0.2088    0.3286    0.1206
Pt    0.2102    0.3925    0.0525
Pt    0.2102    0.3270    0.0778
Pt    0.2107    0.3486    0.0534
Pt    0.2105    0.3255    0.0296
Pt    0.2106    0.3028    0.1001
Pt    0.2101    0.3032    0.0523
Pt    0.2102    0.2795    0.1210
Pt    0.1641    0.4848    0.0535
Pt    0.2119    0.2800    0.0770
Pt    0.0540    0.3021    0.0306
Pt    0.0532    0.3014    0.0776
Pt    0.0535    0.3033    0.1201
Pt    0.0561    0.3486    0.0311
Pt    0.0543    0.3483    0.0758
Pt    0.0533    0.3936    0.0293
Pt    0.0557    0.3919    0.0776
Pt    0.0545    0.4383    0.0295
Pt    0.0527    0.4375    0.0767
Pt    0.0549    0.4399    0.1223
Pt    0.0553    0.4848    0.0311
Pt    0.0538    0.4850    0.0780
Pt    0.0553    0.4841    0.1218
Pt    0.1007    0.3041    0.0303
Pt    0.1002    0.3011    0.0773
Pt    0.0994    0.3459    0.0779
Pt    0.0997    0.4380    0.0260
Pt    0.0998    0.4387    0.0756
Pt    0.0990    0.4828    0.0300
Pt    0.0995    0.4830    0.0759
Pt    0.1416    0.3043    0.0304
Pt    0.1442    0.3029    0.0780
Pt    0.1439    0.4365    0.0730
Pt    0.1442    0.4834    0.0284
Pt    0.1882    0.3039    0.0311
Pt    0.1869    0.3025    0.0770
Pt    0.1884    0.3032    0.1225
Pt    0.1874    0.3487    0.0267
Pt    0.1847    0.3477    0.0742
Pt    0.1879    0.3935    0.0292
Pt    0.1871    0.3922    0.0732
Pt    0.1887    0.4390    0.0290
Pt    0.1874    0.4390    0.0730
Pt    0.1857    0.4379    0.1206
Pt    0.1889    0.4857    0.0294
Pt    0.1869    0.4836    0.0759
Pt    0.1862    0.4839    0.1202
Pt    0.2342    0.3015    0.0288
Pt    0.2335    0.3049    0.0770
Pt    0.2320    0.3058    0.1228
Pt    0.2336    0.3484    0.0293
Pt    0.2361    0.3495    0.0760
Pt    0.2334    0.3913    0.0302
Pt    0.2353    0.4390    0.0308
Pt    0.2326    0.4377    0.0752
Pt    0.2320    0.4392    0.1189
Pt    0.2339    0.4848    0.0288
Pt    0.2340    0.4856    0.0757
Pt    0.2326    0.4830    0.1197
Pt    0.0301    0.2796    0.0318
Pt    0.0305    0.2785    0.0775
Pt    0.0299    0.2810    0.1211
Pt    0.0308    0.3244    0.0310
Pt    0.0296    0.3249    0.0773
Pt    0.0311    0.3711    0.0329
Pt    0.0302    0.3701    0.0777
Pt    0.0312    0.4165    0.0298
Pt    0.0314    0.4155    0.0788
Pt    0.0317    0.4609    0.0310
Pt    0.0318    0.4612    0.0771
Pt    0.0315    0.4613    0.1214
Pt    0.0086    0.3242    0.0533
Pt    0.0078    0.3265    0.0998
Pt    0.0540    0.2802    0.0073
Pt    0.0775    0.2784    0.0304
Pt    0.0789    0.2788    0.0792
Pt    0.0776    0.3237    0.0297
Pt    0.0764    0.3246    0.0763
Pt    0.0767    0.3252    0.1197
Pt    0.0775    0.3722    0.0314
Pt    0.0796    0.3698    0.0752
Pt    0.0783    0.4160    0.0304
Pt    0.0760    0.4165    0.0768
Pt    0.0760    0.4609    0.0291
Pt    0.0771    0.4617    0.0757
Pt    0.0819    0.4607    0.1219
Pt    0.2342    0.4163    0.0074
Pt    0.2557    0.3921    0.0075
Pt    0.2567    0.2825    0.0772
Pt    0.1215    0.2798    0.0299
Pt    0.1218    0.2793    0.0790
Pt    0.1218    0.3257    0.0760
Pt    0.1210    0.4593    0.0281
Pt    0.1242    0.4623    0.0739
Pt    0.2566    0.4861    0.0522
Pt    0.1667    0.2796    0.0301
Pt    0.1667    0.2799    0.0767
Pt    0.1655    0.3269    0.0307
Pt    0.1645    0.3251    0.0761
Pt    0.1675    0.4149    0.0771
Pt    0.1661    0.4612    0.0281
Pt    0.1621    0.4631    0.0769
Pt    0.0076    0.4840    0.0313
Pt    0.0078    0.4369    0.0772
Pt    0.2103    0.2800    0.0291
Pt    0.0102    0.4842    0.0762
Pt    0.1010    0.5063    0.0532
Pt    0.2561    0.3066    0.1007
Pt    0.2562    0.3266    0.0751
Pt    0.0083    0.4392    0.0317
Pt    0.0553    0.3718    0.0080
Pt    0.2569    0.3699    0.0313
Pt    0.1225    0.5056    0.0306
Pt    0.1443    0.2803    0.0086
Pt    0.2113    0.2579    0.0530
Pt    0.0304    0.4391    0.0075
Pt    0.0099    0.4844    0.1216
Pt    0.2556    0.4169    0.0755
Pt    0.2545    0.3296    0.1227
Pt    0.2562    0.3032    0.0536
Pt    0.1659    0.3037    0.0095
Pt    0.0087    0.4626    0.0089
Pt    0.1230    0.3060    0.0078
Pt    0.0305    0.3920    0.0078
Pt    0.0767    0.3490    0.0093
Pt    0.2571    0.3484    0.0078
Pt    0.2573    0.2579    0.0078
Pt    0.0081    0.4161    0.0087
Pt    0.0528    0.3269    0.0085
Pt    0.2115    0.4846    0.0077
Pt    0.1645    0.2581    0.0074
Pt    0.1884    0.2790    0.0074
Pt    0.1654    0.4403    0.1869
Pt    0.0091    0.4831    0.1660
Pt    0.1625    0.3512    0.1899
Pt    0.0077    0.2800    0.2316
Pt    0.1433    0.2577    0.2570
Pt    0.1649    0.3041    0.2336
Pt    0.1645    0.3044    0.1875
Pt    0.1229    0.4843    0.2323
Pt    0.1236    0.4362    0.2337
Pt    0.0089    0.3251    0.2346
Pt    0.1218    0.4380    0.1896
Pt    0.1210    0.3053    0.2347
Pt    0.2098    0.4838    0.2335
Pt    0.2103    0.4851    0.1878
Pt    0.2115    0.4852    0.1435
Pt    0.0539    0.2807    0.1443
Pt    0.0540    0.2803    0.1859
Pt    0.0537    0.2794    0.2332
Pt    0.0551    0.3270    0.1437
Pt    0.0529    0.3275    0.1851
Pt    0.0531    0.3240    0.2346
Pt    0.0551    0.3707    0.1885
Pt    0.0534    0.3721    0.2329
Pt    0.0570    0.4155    0.1888
Pt    0.0566    0.4156    0.2350
Pt    0.0569    0.4609    0.1439
Pt    0.0543    0.4601    0.1876
Pt    0.0545    0.4610    0.2355
Pt    0.0075    0.2577    0.2107
Pt    0.2332    0.2571    0.1646
Pt    0.1869    0.2588    0.2573
Pt    0.0991    0.2818    0.1868
Pt    0.0976    0.2797    0.2324
Pt    0.0996    0.3266    0.1878
Pt    0.1010    0.3297    0.2330
Pt    0.1018    0.4149    0.1898
Pt    0.1020    0.4636    0.1879
Pt    0.0994    0.4622    0.2331
Pt    0.2340    0.4366    0.2564
Pt    0.0080    0.3266    0.1866
Pt    0.1445    0.2804    0.1881
Pt    0.1437    0.2803    0.2343
Pt    0.1423    0.3273    0.1854
Pt    0.1424    0.3298    0.2345
Pt    0.1425    0.4622    0.1859
Pt    0.1445    0.4596    0.2343
Pt    0.1668    0.3270    0.2550
Pt    0.1867    0.2818    0.1883
Pt    0.1882    0.2819    0.2333
Pt    0.1880    0.3268    0.1447
Pt    0.1865    0.3289    0.1898
Pt    0.1879    0.3252    0.2339
Pt    0.1866    0.3700    0.1888
Pt    0.1867    0.4163    0.1872
Pt    0.1863    0.4152    0.2340
Pt    0.1881    0.4612    0.1436
Pt    0.1898    0.4632    0.1882
Pt    0.1883    0.4598    0.2336
Pt    0.0766    0.3054    0.1884
Pt    0.0096    0.3495    0.2087
Pt    0.2573    0.2797    0.2122
Pt    0.2340    0.2801    0.1435
Pt    0.2344    0.2787    0.1890
Pt    0.2350    0.2791    0.2330
Pt    0.2324    0.3275    0.1444
Pt    0.2341    0.3263    0.1894
Pt    0.2338    0.3273    0.2326
Pt    0.2327    0.3725    0.2330
Pt    0.2365    0.4138    0.1853
Pt    0.2335    0.4138    0.2324
Pt    0.2338    0.4613    0.1413
Pt    0.2328    0.4618    0.1872
Pt    0.2351    0.4600    0.2342
Pt    0.1220    0.2586    0.1867
Pt    0.0303    0.2784    0.2563
Pt    0.0323    0.4840    0.2352
Pt    0.2105    0.4380    0.2347
Pt    0.2104    0.4370    0.1857
Pt    0.2100    0.4371    0.1411
Pt    0.2077    0.3926    0.2319
Pt    0.2104    0.3951    0.1873
Pt    0.2099    0.3492    0.2360
Pt    0.2131    0.3504    0.1867
Pt    0.2123    0.3052    0.2340
Pt    0.2104    0.3043    0.1894
Pt    0.2096    0.3043    0.1452
Pt    0.1673    0.4838    0.2352
Pt    0.1652    0.4838    0.1864
Pt    0.1645    0.4376    0.2320
Pt    0.0536    0.3035    0.1647
Pt    0.0536    0.3037    0.2116
Pt    0.1878    0.2592    0.1672
Pt    0.0528    0.3470    0.2120
Pt    0.0076    0.3029    0.1654
Pt    0.0551    0.3935    0.2119
Pt    0.0096    0.4385    0.2105
Pt    0.0547    0.4374    0.1654
Pt    0.0552    0.4380    0.2104
Pt    0.0092    0.4363    0.1669
Pt    0.0556    0.4850    0.1644
Pt    0.0542    0.4839    0.2106
Pt    0.0760    0.3037    0.1435
Pt    0.0989    0.3047    0.2111
Pt    0.1202    0.4617    0.2557
Pt    0.0994    0.4380    0.1662
Pt    0.1005    0.4363    0.2140
Pt    0.0097    0.4143    0.1875
Pt    0.1003    0.4853    0.2110
Pt    0.0328    0.4830    0.1880
Pt    0.1434    0.3032    0.2099
Pt    0.0081    0.4153    0.2325
Pt    0.1449    0.4369    0.2086
Pt    0.0082    0.3042    0.2093
Pt    0.1452    0.4836    0.2110
Pt    0.0076    0.3699    0.2339
Pt    0.1861    0.3037    0.1655
Pt    0.1876    0.3026    0.2095
Pt    0.0766    0.2573    0.2335
Pt    0.1890    0.3494    0.1667
Pt    0.1852    0.3513    0.2131
Pt    0.1215    0.2796    0.2558
Pt    0.1856    0.3960    0.2094
Pt    0.1884    0.4385    0.1634
Pt    0.1895    0.4369    0.2103
Pt    0.2557    0.5060    0.1645
Pt    0.1869    0.4847    0.1654
Pt    0.1875    0.4845    0.2120
Pt    0.0084    0.3932    0.2114
Pt    0.2330    0.3021    0.1665
Pt    0.2351    0.3028    0.2120
Pt    0.2093    0.2584    0.2340
Pt    0.2332    0.3500    0.2097
Pt    0.0312    0.3941    0.2345
Pt    0.2339    0.3922    0.2079
Pt    0.0773    0.4383    0.2347
Pt    0.2320    0.4378    0.1626
Pt    0.2342    0.4374    0.2089
Pt    0.2094    0.2589    0.1431
Pt    0.2352    0.4843    0.1658
Pt    0.2325    0.4829    0.2108
Pt    0.2558    0.3024    0.1875
Pt    0.0292    0.2811    0.1659
Pt    0.0325    0.2791    0.2089
Pt    0.0323    0.3930    0.1881
Pt    0.0286    0.3277    0.1652
Pt    0.0303    0.3255    0.2105
Pt    0.2115    0.4590    0.2105
Pt    0.0311    0.3705    0.2112
Pt    0.0317    0.3478    0.2356
Pt    0.0323    0.4157    0.2114
Pt    0.2101    0.3264    0.2570
Pt    0.0312    0.4596    0.1645
Pt    0.0329    0.4607    0.2121
Pt    0.0314    0.3499    0.1852
Pt    0.0317    0.3007    0.2330
Pt    0.0104    0.4608    0.1887
Pt    0.1889    0.2578    0.2104
Pt    0.0769    0.2802    0.1650
Pt    0.0747    0.2802    0.2082
Pt    0.0311    0.3038    0.1870
Pt    0.0765    0.3260    0.1647
Pt    0.0777    0.3287    0.2109
Pt    0.0297    0.3049    0.1424
Pt    0.0766    0.3675    0.2126
Pt    0.0802    0.4149    0.1677
Pt    0.0794    0.4145    0.2133
Pt    0.0783    0.5068    0.2118
Pt    0.0771    0.4605    0.1669
Pt    0.0774    0.4619    0.2107
Pt    0.0783    0.4376    0.1443
Pt    0.1215    0.3048    0.1874
Pt    0.0762    0.4840    0.2344
Pt    0.0787    0.4848    0.1442
Pt    0.1206    0.2801    0.2106
Pt    0.2572    0.4589    0.2093
Pt    0.1233    0.3275    0.2108
Pt    0.0316    0.4362    0.1876
Pt    0.1229    0.4606    0.2112
Pt    0.2111    0.4615    0.1657
Pt    0.2551    0.3241    0.1653
Pt    0.0747    0.3474    0.1878
Pt    0.1655    0.2790    0.2104
Pt    0.0776    0.4847    0.1864
Pt    0.1657    0.3278    0.1658
Pt    0.1625    0.3287    0.2113
Pt    0.0090    0.3720    0.1878
Pt    0.1658    0.4601    0.2104
Pt    0.0777    0.3024    0.2339
Pt    0.0318    0.4380    0.2353
Pt    0.0805    0.4380    0.1904
Pt    0.2112    0.2816    0.1671
Pt    0.2122    0.2808    0.2120
Pt    0.0329    0.4841    0.1431
Pt    0.2112    0.3279    0.1675
Pt    0.2094    0.3288    0.2118
Pt    0.0793    0.3927    0.1913
Pt    0.2099    0.3711    0.2104
Pt    0.0753    0.3492    0.2358
Pt    0.2113    0.4155    0.2110
Pt    0.2572    0.3925    0.2332
Pt    0.2337    0.5063    0.1422
Pt    0.2572    0.4155    0.2561
Pt    0.2338    0.3931    0.2570
Pt    0.2109    0.4142    0.2559
Pt    0.2344    0.3047    0.2572
Pt    0.1887    0.5066    0.1442
Pt    0.2572    0.4607    0.1648
Pt    0.2343    0.5060    0.2334
Pt    0.2109    0.4624    0.2566
Pt    0.1865    0.5062    0.1884
Pt    0.0320    0.5068    0.2114
Pt    0.2556    0.4368    0.1419
Pt    0.2558    0.3695    0.2567
Pt    0.2322    0.3488    0.2571
Pt    0.2108    0.5068    0.1649
Pt    0.1425    0.3054    0.2573
Pt    0.2568    0.4599    0.2559
Pt    0.2564    0.4372    0.1856
Pt    0.0110    0.4842    0.2132
Pt    0.0092    0.4614    0.2347
Pt    0.2566    0.3037    0.1426
Pt    0.2570    0.3254    0.2111
Pt    0.0317    0.5066    0.1648
Pt    0.2564    0.4365    0.2336
Pt    0.2566    0.3040    0.2351
Pt    0.1212    0.2571    0.2331
Pt    0.0090    0.5057    0.1896
Pt    0.0994    0.3035    0.2567
Pt    0.0085    0.3941    0.2562
Pt    0.1884    0.3037    0.2566
Pt    0.1657    0.5070    0.2570
Pt    0.0312    0.4610    0.2572
Pt    0.2113    0.2815    0.2564
Pt    0.2102    0.3730    0.2565
Pt    0.0783    0.4597    0.2562
Pt    0.0552    0.4381    0.2570
Pt    0.1664    0.2572    0.2341
Pt    0.2114    0.2571    0.1881
Pt    0.1878    0.4842    0.2573
Pt    0.0077    0.4391    0.3021
Pt    0.2113    0.3017    0.3255
Pt    0.2116    0.3020    0.2798
Pt    0.1653    0.4848    0.3266
Pt    0.0541    0.3488    0.2584
Pt    0.1652    0.4854    0.2825
Pt    0.1647    0.4362    0.3273
Pt    0.1655    0.4371    0.2816
Pt    0.0769    0.5069    0.2583
Pt    0.1671    0.3477    0.3249
Pt    0.1647    0.3027    0.3271
Pt    0.1650    0.3026    0.2810
Pt    0.2102    0.4837    0.3720
Pt    0.2098    0.4832    0.3281
Pt    0.2106    0.4845    0.2801
Pt    0.0533    0.2783    0.2793
Pt    0.0532    0.2795    0.3255
Pt    0.0548    0.2805    0.3718
Pt    0.0537    0.3271    0.2801
Pt    0.0532    0.3258    0.3277
Pt    0.0549    0.3258    0.3711
Pt    0.0532    0.3717    0.2826
Pt    0.0535    0.3719    0.3282
Pt    0.0538    0.4146    0.2798
Pt    0.0524    0.4165    0.3277
Pt    0.0546    0.4594    0.2812
Pt    0.0556    0.4617    0.3254
Pt    0.0529    0.4594    0.3719
Pt    0.0079    0.3719    0.2811
Pt    0.1416    0.2572    0.3036
Pt    0.0076    0.4162    0.2806
Pt    0.0990    0.2806    0.2791
Pt    0.0992    0.2805    0.3272
Pt    0.0983    0.3274    0.2808
Pt    0.0971    0.3251    0.3270
Pt    0.0995    0.4151    0.3268
Pt    0.0999    0.4595    0.2807
Pt    0.1001    0.4630    0.3297
Pt    0.0093    0.4394    0.3481
Pt    0.0782    0.3265    0.2576
Pt    0.1424    0.2805    0.2793
Pt    0.1418    0.2796    0.3256
Pt    0.1448    0.3284    0.2796
Pt    0.1443    0.3266    0.3249
Pt    0.1425    0.4601    0.2808
Pt    0.1442    0.4617    0.3283
Pt    0.2567    0.2589    0.3708
Pt    0.1877    0.2798    0.2805
Pt    0.1877    0.2800    0.3251
Pt    0.1871    0.3244    0.2799
Pt    0.1869    0.3242    0.3259
Pt    0.1868    0.3288    0.3717
Pt    0.1885    0.3719    0.3259
Pt    0.1876    0.4148    0.2804
Pt    0.1892    0.4153    0.3253
Pt    0.1881    0.4611    0.2811
Pt    0.1858    0.4605    0.3263
Pt    0.1861    0.4596    0.3721
Pt    0.1881    0.3495    0.2586
Pt    0.1878    0.2576    0.3475
Pt    0.0083    0.4151    0.3274
Pt    0.2359    0.2808    0.2795
Pt    0.2362    0.2811    0.3248
Pt    0.2332    0.2801    0.3719
Pt    0.2332    0.3267    0.2808
Pt    0.2333    0.3249    0.3264
Pt    0.2343    0.3272    0.3700
Pt    0.2331    0.3709    0.2797
Pt    0.2340    0.4159    0.2813
Pt    0.2349    0.4154    0.3272
Pt    0.2340    0.4604    0.2786
Pt    0.2337    0.4615    0.3267
Pt    0.2340    0.4606    0.3706
Pt    0.0299    0.3247    0.2580
Pt    0.0082    0.4857    0.3486
Pt    0.0096    0.4391    0.2585
Pt    0.2095    0.4349    0.3708
Pt    0.2116    0.4378    0.3270
Pt    0.2103    0.4380    0.2800
Pt    0.2117    0.3940    0.3268
Pt    0.2105    0.3935    0.2801
Pt    0.2110    0.3488    0.3266
Pt    0.2093    0.3475    0.2807
Pt    0.2102    0.3038    0.3718
Pt    0.0525    0.3030    0.3030
Pt    0.0533    0.3013    0.3477
Pt    0.0534    0.3476    0.3033
Pt    0.0543    0.3947    0.3038
Pt    0.0551    0.4389    0.3034
Pt    0.0520    0.4372    0.3493
Pt    0.0543    0.4857    0.3039
Pt    0.0535    0.4832    0.3488
Pt    0.0980    0.3033    0.3033
Pt    0.0997    0.4365    0.3023
Pt    0.1004    0.4375    0.3490
Pt    0.0996    0.4844    0.3037
Pt    0.1437    0.3018    0.3036
Pt    0.1440    0.4371    0.3032
Pt    0.1423    0.4840    0.3052
Pt    0.1885    0.3024    0.3025
Pt    0.1882    0.3035    0.3496
Pt    0.1877    0.3502    0.3018
Pt    0.1889    0.3500    0.3476
Pt    0.1881    0.3926    0.3016
Pt    0.1877    0.4374    0.3034
Pt    0.1881    0.4377    0.3482
Pt    0.1880    0.4835    0.3044
Pt    0.1863    0.4842    0.3503
Pt    0.2346    0.3041    0.3029
Pt    0.2337    0.3036    0.3488
Pt    0.2320    0.3487    0.3032
Pt    0.2343    0.3944    0.3048
Pt    0.2340    0.4377    0.3022
Pt    0.2337    0.4357    0.3495
Pt    0.2351    0.4839    0.3019
Pt    0.2342    0.4843    0.3479
Pt    0.0302    0.2799    0.3044
Pt    0.0297    0.2793    0.3482
Pt    0.0297    0.3260    0.3036
Pt    0.0300    0.3267    0.3514
Pt    0.0313    0.3709    0.3044
Pt    0.0294    0.4170    0.3039
Pt    0.0316    0.4639    0.3030
Pt    0.0311    0.4612    0.3488
Pt    0.0084    0.4620    0.2800
Pt    0.0533    0.2581    0.3488
Pt    0.0761    0.2795    0.3026
Pt    0.0757    0.2797    0.3475
Pt    0.0760    0.3273    0.3031
Pt    0.0758    0.3253    0.3488
Pt    0.0748    0.3695    0.3052
Pt    0.0792    0.4141    0.3015
Pt    0.0773    0.4148    0.3476
Pt    0.0774    0.4612    0.3044
Pt    0.0769    0.4598    0.3509
Pt    0.1210    0.3286    0.2579
Pt    0.2100    0.2575    0.2792
Pt    0.1203    0.2802    0.3043
Pt    0.1213    0.3264    0.3026
Pt    0.1208    0.4613    0.3066
Pt    0.2559    0.4368    0.2800
Pt    0.1660    0.2795    0.3026
Pt    0.1658    0.3262    0.3038
Pt    0.1656    0.3255    0.3499
Pt    0.1655    0.4611    0.3027
Pt    0.0077    0.4848    0.2574
Pt    0.2114    0.2797    0.3030
Pt    0.2110    0.2794    0.3487
Pt    0.2101    0.3260    0.3038
Pt    0.2100    0.3273    0.3504
Pt    0.2111    0.3717    0.3037
Pt    0.2104    0.4156    0.3030
Pt    0.2121    0.4601    0.3044
Pt    0.2100    0.4609    0.3501
Pt    0.0084    0.3710    0.3258
Pt    0.0545    0.4834    0.2601
Pt    0.2330    0.2574    0.3026
Pt    0.1215    0.4826    0.2804
Pt    0.0770    0.2798    0.2582
Pt    0.2571    0.4600    0.3481
Pt    0.1188    0.2575    0.3289
Pt    0.1219    0.4373    0.3259
Pt    0.0780    0.5064    0.3040
Pt    0.2566    0.3059    0.3708
Pt    0.1204    0.4364    0.2811
Pt    0.1212    0.3026    0.3270
Pt    0.0290    0.3026    0.2806
Pt    0.0285    0.3035    0.3261
Pt    0.0304    0.3032    0.3722
Pt    0.0296    0.3478    0.2811
Pt    0.0316    0.3467    0.3269
Pt    0.0297    0.3934    0.2806
Pt    0.0311    0.3935    0.3277
Pt    0.0310    0.4391    0.2807
Pt    0.0314    0.4391    0.3254
Pt    0.0301    0.4856    0.2802
Pt    0.0316    0.4854    0.3266
Pt    0.0299    0.4834    0.3708
Pt    0.0757    0.3047    0.2812
Pt    0.0759    0.3027    0.3257
Pt    0.0760    0.3015    0.3713
Pt    0.0771    0.3507    0.2806
Pt    0.0759    0.3480    0.3274
Pt    0.0766    0.3933    0.3264
Pt    0.0775    0.4375    0.2799
Pt    0.0779    0.4387    0.3271
Pt    0.0746    0.4337    0.3705
Pt    0.0782    0.4840    0.2813
Pt    0.0770    0.4849    0.3277
Pt    0.0776    0.4839    0.3723
Pt    0.1210    0.3052    0.2809
Pt    0.1650    0.2824    0.2587
Pt    0.2572    0.3709    0.3038
Pt    0.2561    0.3499    0.3255
Pt    0.2342    0.5068    0.3695
Pt    0.2566    0.3483    0.2804
Pt    0.2342    0.5064    0.3255
Pt    0.0553    0.3915    0.2579
Pt    0.0537    0.5067    0.3722
Pt    0.1883    0.5069    0.2815
Pt    0.2569    0.3045    0.2804
Pt    0.1439    0.4819    0.2577
Pt    0.0998    0.5069    0.2807
Pt    0.1441    0.5065    0.2807
Pt    0.2119    0.5063    0.3482
Pt    0.2571    0.4833    0.3704
Pt    0.2571    0.2800    0.3022
Pt    0.2558    0.4601    0.3032
Pt    0.0315    0.3713    0.2574
Pt    0.2564    0.4379    0.3259
Pt    0.2572    0.4355    0.3690
Pt    0.2569    0.5066    0.3478
Pt    0.0325    0.4158    0.2577
Pt    0.2569    0.4154    0.3034
Pt    0.1885    0.4381    0.2587
Pt    0.2342    0.4842    0.2577
Pt    0.1647    0.4598    0.2584
Pt    0.0998    0.4359    0.2582
Pt    0.1225    0.5071    0.2578
Pt    0.0788    0.4140    0.2581
Pt    0.0988    0.4842    0.2574
Pt    0.2340    0.2573    0.2579
Pt    0.1437    0.4364    0.2581
Pt    0.2564    0.3273    0.2574
Pt    0.0529    0.3026    0.2576
Pt    0.0074    0.3259    0.4595
Pt    0.1873    0.4134    0.5051
Pt    0.0555    0.2581    0.3915
Pt    0.1637    0.4376    0.4616
Pt    0.1647    0.4386    0.4161
Pt    0.2347    0.2580    0.3936
Pt    0.1205    0.2573    0.5069
Pt    0.0093    0.3277    0.4139
Pt    0.1646    0.3045    0.4607
Pt    0.0088    0.3514    0.4334
Pt    0.0546    0.4150    0.5058
Pt    0.1416    0.4565    0.5068
Pt    0.2566    0.5065    0.3941
Pt    0.2544    0.3493    0.5038
Pt    0.2105    0.4847    0.4612
Pt    0.2086    0.4850    0.4159
Pt    0.0550    0.2796    0.4149
Pt    0.0525    0.2794    0.4607
Pt    0.0519    0.3265    0.5057
Pt    0.0546    0.3248    0.4150
Pt    0.0529    0.3268    0.4588
Pt    0.2106    0.3940    0.5062
Pt    0.0539    0.3733    0.4589
Pt    0.1865    0.2805    0.5067
Pt    0.0522    0.4151    0.4619
Pt    0.1654    0.4357    0.5059
Pt    0.0526    0.4611    0.4157
Pt    0.0528    0.4619    0.4606
Pt    0.0531    0.2572    0.4390
Pt    0.2324    0.3256    0.5065
Pt    0.0074    0.3252    0.5057
Pt    0.2331    0.2574    0.4827
Pt    0.1005    0.2789    0.4584
Pt    0.2573    0.4602    0.4848
Pt    0.0985    0.3250    0.4147
Pt    0.0995    0.3279    0.4632
Pt    0.0299    0.2580    0.4140
Pt    0.0976    0.4607    0.4609
Pt    0.1201    0.3046    0.5056
Pt    0.0073    0.4846    0.4853
Pt    0.0298    0.3948    0.5072
Pt    0.1420    0.2802    0.4595
Pt    0.2561    0.3945    0.5071
Pt    0.1426    0.3280    0.4604
Pt    0.1433    0.4607    0.4588
Pt    0.1870    0.2577    0.4827
Pt    0.0076    0.4387    0.4399
Pt    0.2564    0.4150    0.4375
Pt    0.1865    0.2817    0.4158
Pt    0.1887    0.2816    0.4606
Pt    0.0761    0.3492    0.4592
Pt    0.1848    0.3256    0.4132
Pt    0.1846    0.3290    0.4598
Pt    0.1204    0.4821    0.4601
Pt    0.1853    0.3700    0.4603
Pt    0.0078    0.2801    0.4603
Pt    0.1886    0.4171    0.4174
Pt    0.1856    0.4159    0.4607
Pt    0.0784    0.3002    0.4135
Pt    0.1867    0.4616    0.4149
Pt    0.1866    0.4617    0.4607
Pt    0.0756    0.4838    0.4607
Pt    0.0761    0.4369    0.4616
Pt    0.0753    0.3490    0.4128
Pt    0.0774    0.3040    0.4595
Pt    0.2331    0.2797    0.4153
Pt    0.2333    0.2808    0.4607
Pt    0.0297    0.4850    0.4632
Pt    0.2319    0.3276    0.4156
Pt    0.2322    0.3262    0.4611
Pt    0.0301    0.3038    0.4143
Pt    0.2338    0.3715    0.4594
Pt    0.0285    0.4834    0.4152
Pt    0.2327    0.4148    0.4609
Pt    0.0312    0.4384    0.4628
Pt    0.2330    0.4594    0.4168
Pt    0.2340    0.4617    0.4611
Pt    0.2559    0.4385    0.4601
Pt    0.2102    0.4604    0.4861
Pt    0.2108    0.4626    0.4387
Pt    0.0759    0.4365    0.4164
Pt    0.1209    0.3041    0.4605
Pt    0.2111    0.4373    0.4592
Pt    0.2098    0.4380    0.4144
Pt    0.2557    0.2801    0.4381
Pt    0.2086    0.3932    0.4614
Pt    0.0299    0.3502    0.4591
Pt    0.2104    0.3503    0.4614
Pt    0.0304    0.4388    0.4164
Pt    0.2105    0.3038    0.4601
Pt    0.2098    0.3054    0.4159
Pt    0.2095    0.4162    0.4836
Pt    0.1619    0.4842    0.4597
Pt    0.0529    0.3040    0.3927
Pt    0.0546    0.3021    0.4365
Pt    0.0541    0.3039    0.4821
Pt    0.0525    0.3497    0.4362
Pt    0.0522    0.3494    0.4826
Pt    0.0516    0.3949    0.4354
Pt    0.0530    0.3933    0.4831
Pt    0.0548    0.4372    0.3939
Pt    0.0536    0.4370    0.4380
Pt    0.0529    0.4393    0.4849
Pt    0.0535    0.4835    0.3922
Pt    0.0536    0.4842    0.4378
Pt    0.0532    0.4852    0.4848
Pt    0.0996    0.3012    0.4357
Pt    0.0989    0.3029    0.4835
Pt    0.0984    0.3500    0.4364
Pt    0.0991    0.4380    0.4392
Pt    0.1001    0.4370    0.4847
Pt    0.0990    0.4834    0.4370
Pt    0.0996    0.4840    0.4848
Pt    0.1427    0.3037    0.4376
Pt    0.1422    0.3047    0.4824
Pt    0.1413    0.4388    0.4352
Pt    0.1428    0.4828    0.4838
Pt    0.1861    0.3036    0.3922
Pt    0.1871    0.3053    0.4373
Pt    0.1860    0.3034    0.4836
Pt    0.1880    0.3499    0.4348
Pt    0.1859    0.3497    0.4844
Pt    0.1850    0.3933    0.4379
Pt    0.1841    0.3920    0.4828
Pt    0.1845    0.4375    0.3944
Pt    0.1866    0.4389    0.4392
Pt    0.1869    0.4393    0.4835
Pt    0.1864    0.4850    0.3930
Pt    0.1871    0.4848    0.4385
Pt    0.1874    0.4840    0.4840
Pt    0.2330    0.3041    0.3935
Pt    0.2339    0.3044    0.4376
Pt    0.2348    0.3026    0.4840
Pt    0.2329    0.3492    0.4380
Pt    0.2316    0.3496    0.4825
Pt    0.2338    0.3931    0.4830
Pt    0.2342    0.4368    0.3931
Pt    0.2334    0.4360    0.4365
Pt    0.2318    0.4379    0.4844
Pt    0.2323    0.4840    0.3925
Pt    0.2332    0.4837    0.4372
Pt    0.2326    0.4829    0.4854
Pt    0.0310    0.2797    0.3923
Pt    0.0306    0.2799    0.4360
Pt    0.0289    0.2800    0.4830
Pt    0.0307    0.3268    0.4362
Pt    0.0289    0.3271    0.4833
Pt    0.0307    0.3717    0.4345
Pt    0.0293    0.3723    0.4825
Pt    0.0299    0.4150    0.4376
Pt    0.0292    0.4152    0.4843
Pt    0.0292    0.4599    0.3929
Pt    0.0307    0.4626    0.4402
Pt    0.0297    0.4605    0.4858
Pt    0.0305    0.3044    0.4607
Pt    0.1205    0.4365    0.4606
Pt    0.0778    0.3930    0.4583
Pt    0.0769    0.2795    0.4388
Pt    0.0756    0.2794    0.4828
Pt    0.0780    0.3251    0.3922
Pt    0.0772    0.3264    0.4369
Pt    0.0766    0.3275    0.4843
Pt    0.0745    0.3711    0.4351
Pt    0.0746    0.3713    0.4822
Pt    0.0750    0.4146    0.4393
Pt    0.0775    0.4142    0.4839
Pt    0.0750    0.4604    0.3944
Pt    0.0759    0.4608    0.4370
Pt    0.0757    0.4605    0.4830
Pt    0.0080    0.3038    0.4364
Pt    0.0769    0.4840    0.4148
Pt    0.0287    0.3929    0.4595
Pt    0.1221    0.2781    0.4328
Pt    0.1193    0.2803    0.4834
Pt    0.1185    0.3248    0.4392
Pt    0.1193    0.4607    0.4360
Pt    0.1223    0.4589    0.4837
Pt    0.2100    0.4604    0.3937
Pt    0.1664    0.2789    0.4386
Pt    0.1650    0.2810    0.4828
Pt    0.1639    0.3252    0.4362
Pt    0.1629    0.3279    0.4839
Pt    0.1635    0.4173    0.4384
Pt    0.1633    0.4627    0.4349
Pt    0.1640    0.4615    0.4842
Pt    0.2573    0.3256    0.4372
Pt    0.2326    0.3706    0.5072
Pt    0.2086    0.2807    0.3935
Pt    0.2100    0.2812    0.4383
Pt    0.2102    0.2805    0.4842
Pt    0.2095    0.3264    0.3920
Pt    0.2083    0.3275    0.4388
Pt    0.2082    0.3252    0.4843
Pt    0.2105    0.3716    0.4380
Pt    0.2083    0.3717    0.4841
Pt    0.2104    0.4132    0.4385
Pt    0.2558    0.3928    0.4567
Pt    0.2564    0.4376    0.5073
Pt    0.2095    0.3491    0.5058
Pt    0.2557    0.4583    0.3938
Pt    0.2568    0.4832    0.4149
Pt    0.2558    0.3486    0.4594
Pt    0.0517    0.5064    0.4615
Pt    0.2569    0.4843    0.4614
Pt    0.1864    0.5061    0.4609
Pt    0.0539    0.2803    0.5062
Pt    0.0768    0.2580    0.4155
Pt    0.0300    0.3025    0.5053
Pt    0.0971    0.3261    0.5068
Pt    0.2565    0.4149    0.4820
Pt    0.2087    0.5065    0.4387
Pt    0.1411    0.2818    0.5056
Pt    0.2571    0.2801    0.3937
Pt    0.1845    0.3268    0.5056
Pt    0.2550    0.3262    0.4837
Pt    0.2563    0.3038    0.4145
Pt    0.2571    0.3716    0.4824
Pt    0.0748    0.3501    0.5069
Pt    0.2340    0.5060    0.4615
Pt    0.0082    0.2574    0.4362
Pt    0.2563    0.3277    0.3942
Pt    0.0750    0.3036    0.5073
Pt    0.2571    0.5067    0.4387
Pt    0.2560    0.2786    0.4834
Pt    0.2088    0.2576    0.5067
Pt    0.2555    0.3026    0.5066
Pt    0.1651    0.4848    0.5057
Pt    0.2569    0.3013    0.4609
Pt    0.1195    0.5062    0.4825
Pt    0.0298    0.5055    0.4394
Pt    0.1408    0.5059    0.4589
Pt    0.1877    0.5070    0.5071
Pt    0.2338    0.5060    0.4162
Pt    0.0311    0.5063    0.3932
Pt    0.0755    0.4837    0.5060
Pt    0.2341    0.4158    0.5061
Pt    0.0985    0.2803    0.5060
Pt    0.1864    0.3737    0.5068
Pt    0.0528    0.3723    0.5048
Pt    0.1658    0.2575    0.5069
Pt    0.1220    0.4825    0.5073
Pt    0.1210    0.3040    0.5549
Pt    0.0766    0.4826    0.6008
Pt    0.2567    0.5064    0.5290
Pt    0.0767    0.4845    0.5560
Pt    0.0754    0.2587    0.5532
Pt    0.1885    0.2575    0.5305
Pt    0.1430    0.2584    0.5778
Pt    0.0302    0.4372    0.5078
Pt    0.2105    0.4845    0.5994
Pt    0.2103    0.4841    0.5532
Pt    0.0537    0.2804    0.5523
Pt    0.0552    0.2812    0.5987
Pt    0.0546    0.3285    0.5531
Pt    0.0503    0.3275    0.6001
Pt    0.0541    0.3716    0.5535
Pt    0.0526    0.4155    0.5539
Pt    0.0532    0.4611    0.5536
Pt    0.0529    0.4610    0.6003
Pt    0.0083    0.3486    0.5767
Pt    0.2557    0.3496    0.5535
Pt    0.0988    0.2815    0.5546
Pt    0.1000    0.3267    0.5532
Pt    0.1004    0.3246    0.5990
Pt    0.0988    0.4618    0.5544
Pt    0.2568    0.4618    0.5301
Pt    0.1424    0.2799    0.5533
Pt    0.1430    0.3267    0.5539
Pt    0.1428    0.4624    0.5562
Pt    0.2547    0.4354    0.5997
Pt    0.1890    0.2807    0.5543
Pt    0.1854    0.2818    0.5987
Pt    0.1864    0.3279    0.5522
Pt    0.1872    0.3281    0.5982
Pt    0.1861    0.3688    0.5524
Pt    0.1871    0.4171    0.5526
Pt    0.1874    0.4152    0.5991
Pt    0.1850    0.4612    0.5539
Pt    0.1870    0.4615    0.5996
Pt    0.0308    0.2571    0.5982
Pt    0.1865    0.4609    0.5080
Pt    0.2319    0.2786    0.5535
Pt    0.2335    0.2807    0.5989
Pt    0.2333    0.3263    0.5537
Pt    0.2344    0.3282    0.5988
Pt    0.2344    0.3709    0.5529
Pt    0.2311    0.4159    0.5535
Pt    0.2334    0.4625    0.5530
Pt    0.2315    0.4595    0.5987
Pt    0.0977    0.4617    0.5092
Pt    0.2545    0.2793    0.5766
Pt    0.2103    0.4369    0.5986
Pt    0.2093    0.4388    0.5540
Pt    0.2102    0.3928    0.5516
Pt    0.2104    0.3494    0.5524
Pt    0.2110    0.3048    0.5977
Pt    0.2097    0.3042    0.5533
Pt    0.1643    0.4833    0.5552
Pt    0.1646    0.4383    0.5988
Pt    0.1632    0.4372    0.5529
Pt    0.1645    0.3049    0.5533
Pt    0.1222    0.4843    0.5549
Pt    0.1208    0.4364    0.5546
Pt    0.0529    0.3028    0.5305
Pt    0.0529    0.3024    0.5768
Pt    0.0539    0.3043    0.6207
Pt    0.0537    0.3497    0.5295
Pt    0.0533    0.3504    0.5771
Pt    0.0539    0.3934    0.5303
Pt    0.0526    0.3931    0.5770
Pt    0.0524    0.4380    0.5307
Pt    0.0521    0.4378    0.5761
Pt    0.0549    0.4366    0.6211
Pt    0.0543    0.4836    0.5303
Pt    0.0532    0.4838    0.5774
Pt    0.0525    0.4826    0.6229
Pt    0.0995    0.3050    0.5310
Pt    0.0976    0.3028    0.5777
Pt    0.0983    0.3469    0.5775
Pt    0.0985    0.4377    0.5299
Pt    0.0984    0.4379    0.5777
Pt    0.0985    0.4832    0.5312
Pt    0.0979    0.4831    0.5796
Pt    0.1402    0.3049    0.5302
Pt    0.1445    0.3050    0.5759
Pt    0.1422    0.4369    0.5763
Pt    0.1436    0.4846    0.5308
Pt    0.1880    0.3043    0.5298
Pt    0.1865    0.3046    0.5741
Pt    0.1882    0.3043    0.6186
Pt    0.1860    0.3492    0.5286
Pt    0.1882    0.3505    0.5775
Pt    0.1841    0.3943    0.5304
Pt    0.1878    0.3928    0.5738
Pt    0.1864    0.4381    0.5295
Pt    0.1869    0.4389    0.5767
Pt    0.1890    0.4400    0.6213
Pt    0.1858    0.4835    0.5308
Pt    0.1885    0.4839    0.5756
Pt    0.1876    0.4833    0.6217
Pt    0.2342    0.3024    0.5296
Pt    0.2328    0.3033    0.5754
Pt    0.2334    0.3057    0.6208
Pt    0.2324    0.3470    0.5301
Pt    0.2340    0.3482    0.5757
Pt    0.2331    0.3940    0.5292
Pt    0.2333    0.4381    0.5308
Pt    0.2345    0.4367    0.5776
Pt    0.2340    0.4371    0.6205
Pt    0.2341    0.4830    0.5299
Pt    0.2340    0.4840    0.5764
Pt    0.2349    0.4840    0.6206
Pt    0.0303    0.2820    0.5306
Pt    0.0301    0.2799    0.5774
Pt    0.0318    0.2811    0.6213
Pt    0.0305    0.3261    0.5298
Pt    0.0294    0.3255    0.5764
Pt    0.0314    0.3738    0.5310
Pt    0.0308    0.3698    0.5773
Pt    0.0303    0.4154    0.5315
Pt    0.0293    0.4136    0.5786
Pt    0.0301    0.4617    0.5306
Pt    0.0289    0.4594    0.5774
Pt    0.0304    0.4591    0.6234
Pt    0.0516    0.4608    0.5076
Pt    0.2319    0.4586    0.5084
Pt    0.2324    0.5062    0.5079
Pt    0.0778    0.2816    0.5291
Pt    0.0765    0.2787    0.5763
Pt    0.0759    0.3269    0.5309
Pt    0.0744    0.3253    0.5785
Pt    0.0742    0.3271    0.6202
Pt    0.0774    0.3712    0.5306
Pt    0.0770    0.3723    0.5773
Pt    0.0764    0.4159    0.5297
Pt    0.0761    0.4151    0.5755
Pt    0.0753    0.4602    0.5320
Pt    0.0756    0.4595    0.5754
Pt    0.0783    0.4600    0.6214
Pt    0.2569    0.2571    0.5542
Pt    0.0531    0.2581    0.6212
Pt    0.0319    0.2579    0.5534
Pt    0.1205    0.2804    0.5307
Pt    0.1216    0.2796    0.5770
Pt    0.1223    0.3265    0.5785
Pt    0.1204    0.4595    0.5301
Pt    0.1206    0.4617    0.5772
Pt    0.2565    0.5070    0.5737
Pt    0.1665    0.2815    0.5306
Pt    0.1659    0.2811    0.5757
Pt    0.1634    0.3268    0.5290
Pt    0.1650    0.3300    0.5768
Pt    0.1655    0.4151    0.5764
Pt    0.1645    0.4600    0.5302
Pt    0.1644    0.4617    0.5788
Pt    0.1648    0.5060    0.5771
Pt    0.0289    0.5062    0.6222
Pt    0.2098    0.2803    0.5301
Pt    0.2100    0.2798    0.5778
Pt    0.2102    0.2811    0.6210
Pt    0.2100    0.3262    0.5295
Pt    0.2100    0.3284    0.5770
Pt    0.2112    0.3281    0.6196
Pt    0.2097    0.3704    0.5297
Pt    0.2106    0.3722    0.5741
Pt    0.2095    0.4150    0.5299
Pt    0.2100    0.4141    0.5776
Pt    0.2091    0.4612    0.5320
Pt    0.2099    0.4612    0.5767
Pt    0.2114    0.4616    0.6219
Pt    0.2556    0.2784    0.5314
Pt    0.0074    0.4837    0.5317
Pt    0.0991    0.5057    0.5081
Pt    0.0749    0.4376    0.5990
Pt    0.0770    0.4369    0.5537
Pt    0.2090    0.2583    0.6006
Pt    0.0782    0.3950    0.5522
Pt    0.0772    0.3498    0.5993
Pt    0.0781    0.3486    0.5537
Pt    0.0787    0.3012    0.6014
Pt    0.0764    0.3050    0.5547
Pt    0.0294    0.4842    0.5994
Pt    0.2566    0.3268    0.5286
Pt    0.0310    0.4844    0.5535
Pt    0.1439    0.2577    0.5302
Pt    0.2570    0.4605    0.5771
Pt    0.2558    0.4840    0.5963
Pt    0.2570    0.3041    0.6002
Pt    0.0302    0.3031    0.5537
Pt    0.0283    0.3045    0.5980
Pt    0.0291    0.3494    0.5529
Pt    0.0303    0.3947    0.5540
Pt    0.0288    0.4381    0.5540
Pt    0.0305    0.4372    0.5997
Pt    0.0530    0.5069    0.5548
Pt    0.0304    0.4845    0.5085
Pt    0.2561    0.3255    0.5777
Pt    0.0074    0.2804    0.5529
Pt    0.2567    0.4162    0.5307
Pt    0.0078    0.3278    0.5994
Pt    0.2560    0.2801    0.6211
Pt    0.1209    0.5066    0.5324
Pt    0.2564    0.4148    0.5754
Pt    0.2556    0.3012    0.5538
Pt    0.1861    0.5065    0.6006
Pt    0.2558    0.3700    0.5290
Pt    0.2546    0.3937    0.5533
Pt    0.0521    0.5061    0.5994
Pt    0.2573    0.3277    0.6206
Pt    0.2565    0.4610    0.6202
Pt    0.2558    0.4393    0.5535
Pt    0.0763    0.5066    0.6219
Pt    0.2325    0.5052    0.5519
Pt    0.2083    0.5063    0.5301
Pt    0.1631    0.5064    0.5302
Pt    0.0297    0.3489    0.5078
Pt    0.0752    0.4390    0.5083
Pt    0.1633    0.3037    0.5082
Pt    0.2099    0.4368    0.5093
Pt    0.0081    0.2793    0.5075
Pt    0.2104    0.4839    0.5089
Pt    0.2095    0.3026    0.5080
Pt    0.2566    0.2577    0.5081
Pt    0.0077    0.3727    0.5074
Pt    0.0768    0.3927    0.5074
Pt    0.2328    0.2797    0.5074
Pt    0.2339    0.2581    0.6660
Pt    0.1441    0.4841    0.7556
Pt    0.0081    0.4144    0.6857
Pt    0.1209    0.2572    0.7338
Pt    0.0310    0.2575    0.6440
Pt    0.1215    0.2584    0.6867
Pt    0.0304    0.2573    0.6872
Pt    0.2098    0.2584    0.6430
Pt    0.2555    0.2577    0.6437
Pt    0.2345    0.3021    0.7561
Pt    0.1664    0.2586    0.7335
Pt    0.0764    0.2584    0.6870
Pt    0.2106    0.4848    0.7341
Pt    0.2117    0.4849    0.6882
Pt    0.2103    0.4845    0.6434
Pt    0.0544    0.2818    0.6413
Pt    0.0539    0.2809    0.6878
Pt    0.0525    0.2798    0.7345
Pt    0.0514    0.3296    0.6412
Pt    0.0516    0.3280    0.6867
Pt    0.0523    0.3263    0.7347
Pt    0.0542    0.3704    0.6861
Pt    0.0542    0.3691    0.7344
Pt    0.0532    0.4147    0.6904
Pt    0.0537    0.4142    0.7361
Pt    0.0538    0.4593    0.6436
Pt    0.0521    0.4614    0.6884
Pt    0.0550    0.4614    0.7335
Pt    0.2572    0.4376    0.6876
Pt    0.2107    0.2575    0.6878
Pt    0.1630    0.3030    0.6857
Pt    0.0998    0.2806    0.6865
Pt    0.0989    0.2800    0.7328
Pt    0.0971    0.3260    0.6859
Pt    0.0994    0.3302    0.7336
Pt    0.0988    0.4150    0.6886
Pt    0.0992    0.4603    0.6876
Pt    0.0972    0.4614    0.7347
Pt    0.1220    0.4814    0.7322
Pt    0.0743    0.3262    0.7573
Pt    0.1428    0.2791    0.6865
Pt    0.1418    0.2803    0.7327
Pt    0.1430    0.3268    0.6874
Pt    0.1423    0.3261    0.7343
Pt    0.1437    0.4605    0.6869
Pt    0.1438    0.4575    0.7336
Pt    0.2564    0.4609    0.7113
Pt    0.1872    0.2808    0.6881
Pt    0.1887    0.2814    0.7335
Pt    0.1887    0.3281    0.6436
Pt    0.1874    0.3267    0.6888
Pt    0.1882    0.3254    0.7349
Pt    0.1837    0.3708    0.6913
Pt    0.1869    0.4137    0.6892
Pt    0.1892    0.4160    0.7344
Pt    0.1868    0.4593    0.6434
Pt    0.1879    0.4619    0.6876
Pt    0.1893    0.4608    0.7344
Pt    0.0978    0.2575    0.7096
Pt    0.0771    0.5060    0.6652
Pt    0.0974    0.3036    0.7562
Pt    0.2327    0.2821    0.6437
Pt    0.2331    0.2815    0.6881
Pt    0.2335    0.2786    0.7321
Pt    0.2336    0.3283    0.6431
Pt    0.2323    0.3270    0.6875
Pt    0.2337    0.3260    0.7346
Pt    0.2339    0.3718    0.7338
Pt    0.2310    0.4142    0.6862
Pt    0.2338    0.4141    0.7339
Pt    0.2347    0.4605    0.6436
Pt    0.2327    0.4605    0.6873
Pt    0.2329    0.4610    0.7332
Pt    0.1194    0.4369    0.7329
Pt    0.2554    0.4371    0.7326
Pt    0.1641    0.3476    0.6898
Pt    0.2110    0.4367    0.7343
Pt    0.2114    0.4374    0.6873
Pt    0.2112    0.4381    0.6437
Pt    0.2100    0.3932    0.7350
Pt    0.2091    0.3915    0.6888
Pt    0.2107    0.3485    0.7359
Pt    0.2105    0.3522    0.6877
Pt    0.2102    0.3033    0.7329
Pt    0.0524    0.3052    0.6646
Pt    0.0530    0.3027    0.7097
Pt    0.0550    0.3481    0.7103
Pt    0.0536    0.3922    0.7126
Pt    0.0526    0.4379    0.6645
Pt    0.0537    0.4383    0.7111
Pt    0.0542    0.4829    0.6675
Pt    0.0531    0.4834    0.7112
Pt    0.0972    0.3032    0.7089
Pt    0.0992    0.4361    0.6654
Pt    0.0973    0.4373    0.7113
Pt    0.0984    0.4832    0.7110
Pt    0.1427    0.3032    0.7109
Pt    0.1424    0.4360    0.7096
Pt    0.1448    0.4843    0.7084
Pt    0.1863    0.3037    0.6647
Pt    0.1872    0.3030    0.7097
Pt    0.1866    0.3505    0.6670
Pt    0.1864    0.3489    0.7128
Pt    0.1869    0.3936    0.7132
Pt    0.1893    0.4364    0.6660
Pt    0.1879    0.4377    0.7107
Pt    0.1864    0.4834    0.6630
Pt    0.1892    0.4836    0.7095
Pt    0.2330    0.3050    0.6648
Pt    0.2335    0.3038    0.7111
Pt    0.2330    0.3501    0.7122
Pt    0.2327    0.3923    0.7080
Pt    0.2333    0.4367    0.6649
Pt    0.2322    0.4359    0.7112
Pt    0.2350    0.4843    0.6660
Pt    0.2322    0.4853    0.7103
Pt    0.0306    0.2807    0.6656
Pt    0.0302    0.2808    0.7107
Pt    0.0309    0.3299    0.6647
Pt    0.0306    0.3257    0.7105
Pt    0.0303    0.3722    0.7119
Pt    0.0309    0.4145    0.7113
Pt    0.0302    0.4591    0.6656
Pt    0.0302    0.4601    0.7118
Pt    0.2117    0.2779    0.7560
Pt    0.1647    0.3018    0.7344
Pt    0.0765    0.2828    0.6650
Pt    0.0761    0.2810    0.7113
Pt    0.0737    0.3316    0.6629
Pt    0.0760    0.3268    0.7105
Pt    0.0779    0.3711    0.7107
Pt    0.0751    0.4155    0.6647
Pt    0.0772    0.4135    0.7144
Pt    0.0771    0.4604    0.6654
Pt    0.0762    0.4605    0.7091
Pt    0.1208    0.4374    0.6881
Pt    0.1903    0.2576    0.7115
Pt    0.1203    0.2815    0.7101
Pt    0.1194    0.3261    0.7088
Pt    0.1217    0.4597    0.7107
Pt    0.2567    0.2816    0.6653
Pt    0.1647    0.2800    0.7100
Pt    0.1644    0.3284    0.6645
Pt    0.1650    0.3250    0.7124
Pt    0.1659    0.4602    0.7104
Pt    0.0090    0.4592    0.7351
Pt    0.2097    0.2808    0.6662
Pt    0.2106    0.2813    0.7114
Pt    0.2099    0.3295    0.6653
Pt    0.2104    0.3274    0.7118
Pt    0.2103    0.3701    0.7124
Pt    0.2106    0.4136    0.7106
Pt    0.2111    0.4613    0.6653
Pt    0.2104    0.4600    0.7095
Pt    0.2572    0.3478    0.6891
Pt    0.0077    0.4371    0.7108
Pt    0.1656    0.4384    0.6873
Pt    0.2570    0.3271    0.6669
Pt    0.1198    0.5059    0.7112
Pt    0.0990    0.5069    0.6878
Pt    0.2097    0.3035    0.6441
Pt    0.1654    0.4844    0.6860
Pt    0.1658    0.4366    0.7336
Pt    0.2109    0.3050    0.6878
Pt    0.1659    0.4832    0.7333
Pt    0.2558    0.3052    0.6887
Pt    0.0309    0.3062    0.6428
Pt    0.0292    0.3040    0.6883
Pt    0.0304    0.3024    0.7329
Pt    0.0296    0.3499    0.6881
Pt    0.0306    0.3493    0.7347
Pt    0.0301    0.3922    0.6855
Pt    0.0311    0.3913    0.7361
Pt    0.0292    0.4381    0.6892
Pt    0.0308    0.4383    0.7350
Pt    0.0305    0.4828    0.6450
Pt    0.0298    0.4842    0.6895
Pt    0.0294    0.4854    0.7326
Pt    0.0763    0.3059    0.6425
Pt    0.0751    0.3046    0.6862
Pt    0.0747    0.3022    0.7356
Pt    0.0789    0.3498    0.6892
Pt    0.0753    0.3489    0.7348
Pt    0.0763    0.3938    0.6887
Pt    0.0768    0.4371    0.6445
Pt    0.0758    0.4367    0.6880
Pt    0.0759    0.4374    0.7356
Pt    0.0768    0.4835    0.6424
Pt    0.0768    0.4837    0.6881
Pt    0.0757    0.4857    0.7334
Pt    0.1199    0.3041    0.6861
Pt    0.1194    0.3048    0.7331
Pt    0.0521    0.5069    0.7347
Pt    0.0074    0.4608    0.6886
Pt    0.0074    0.4591    0.6444
Pt    0.1878    0.5068    0.6411
Pt    0.2568    0.5064    0.7104
Pt    0.1656    0.3275    0.7559
Pt    0.2557    0.3055    0.6436
Pt    0.1651    0.2794    0.7573
Pt    0.2573    0.4596    0.6657
Pt    0.2565    0.3492    0.7344
Pt    0.1004    0.5065    0.7335
Pt    0.2551    0.4141    0.7080
Pt    0.0545    0.2589    0.6646
Pt    0.2347    0.4819    0.7571
Pt    0.0076    0.2798    0.6445
Pt    0.2567    0.4841    0.6887
Pt    0.1438    0.5069    0.7338
Pt    0.2568    0.5046    0.7560
Pt    0.1890    0.5063    0.7340
Pt    0.2565    0.3730    0.7089
Pt    0.2568    0.3706    0.7572
Pt    0.2571    0.3263    0.7126
Pt    0.2559    0.2575    0.6894
Pt    0.2570    0.2796    0.7573
Pt    0.0765    0.2782    0.7563
Pt    0.2134    0.4600    0.7567
Pt    0.0779    0.4133    0.7559
Pt    0.2335    0.4360    0.7569
Pt    0.1876    0.3037    0.7571
Pt    0.0980    0.4840    0.7569
Pt    0.1205    0.2814    0.7565
Pt    0.0537    0.4824    0.7568
Pt    0.1200    0.3260    0.7572
Pt    0.0996    0.4375    0.7572
Pt    0.0304    0.2787    0.7559
Pt    0.2572    0.4601    0.7561
Pt    0.1886    0.4372    0.7573
Pt    0.1889    0.4836    0.7572
Pt    0.0563    0.3906    0.7573
Pt    0.0098    0.4379    0.8500
Pt    0.2109    0.4141    0.7581
Pt    0.0084    0.4384    0.8044
Pt    0.0091    0.3706    0.8306
Pt    0.2573    0.4599    0.8035
Pt    0.2120    0.4599    0.8489
Pt    0.2113    0.4602    0.8040
Pt    0.0092    0.2805    0.8719
Pt    0.0081    0.2807    0.8258
Pt    0.0088    0.3040    0.8038
Pt    0.2107    0.4146    0.8029
Pt    0.0092    0.3065    0.8497
Pt    0.2106    0.4836    0.8705
Pt    0.2113    0.4827    0.8261
Pt    0.2119    0.4827    0.7800
Pt    0.0535    0.2781    0.7811
Pt    0.0532    0.2783    0.8264
Pt    0.0548    0.2791    0.8724
Pt    0.0527    0.3243    0.7811
Pt    0.0534    0.3269    0.8257
Pt    0.0547    0.3259    0.8705
Pt    0.0550    0.3707    0.7822
Pt    0.0551    0.3716    0.8281
Pt    0.0551    0.4142    0.7791
Pt    0.0541    0.4163    0.8270
Pt    0.0525    0.4610    0.7825
Pt    0.0545    0.4614    0.8277
Pt    0.0551    0.4603    0.8713
Pt    0.0087    0.4150    0.8301
Pt    0.2107    0.2579    0.8702
Pt    0.0077    0.3935    0.8071
Pt    0.0977    0.2789    0.7798
Pt    0.1003    0.2773    0.8275
Pt    0.0989    0.3249    0.7808
Pt    0.0982    0.3263    0.8275
Pt    0.1007    0.4160    0.8268
Pt    0.1014    0.4622    0.7820
Pt    0.0997    0.4628    0.8266
Pt    0.0079    0.4847    0.8485
Pt    0.1650    0.2583    0.8263
Pt    0.1444    0.2787    0.7811
Pt    0.1415    0.2787    0.8288
Pt    0.1430    0.3263    0.7826
Pt    0.1427    0.3252    0.8271
Pt    0.1443    0.4606    0.7813
Pt    0.1456    0.4599    0.8267
Pt    0.0092    0.3279    0.8286
Pt    0.1872    0.2788    0.7794
Pt    0.1870    0.2813    0.8263
Pt    0.1874    0.3269    0.7809
Pt    0.1887    0.3248    0.8243
Pt    0.1901    0.3266    0.8707
Pt    0.1902    0.3709    0.8270
Pt    0.1862    0.4145    0.7814
Pt    0.1907    0.4138    0.8279
Pt    0.1893    0.4599    0.7799
Pt    0.1880    0.4599    0.8273
Pt    0.1868    0.4602    0.8704
Pt    0.1684    0.5066    0.8031
Pt    0.1216    0.4606    0.7576
Pt    0.0763    0.5058    0.7584
Pt    0.2351    0.2791    0.7805
Pt    0.2346    0.2794    0.8253
Pt    0.2349    0.2783    0.8712
Pt    0.2352    0.3261    0.7810
Pt    0.2340    0.3250    0.8264
Pt    0.2323    0.3281    0.8708
Pt    0.2339    0.3718    0.7821
Pt    0.2355    0.4145    0.7812
Pt    0.2354    0.4148    0.8297
Pt    0.2362    0.4591    0.7804
Pt    0.2351    0.4600    0.8263
Pt    0.2355    0.4604    0.8710
Pt    0.0527    0.3003    0.7587
Pt    0.1661    0.4602    0.7574
Pt    0.2562    0.3263    0.8495
Pt    0.2109    0.4373    0.8698
Pt    0.2122    0.4371    0.8272
Pt    0.2111    0.4366    0.7804
Pt    0.2139    0.3924    0.8274
Pt    0.2102    0.3935    0.7812
Pt    0.2125    0.3476    0.8265
Pt    0.2104    0.3489    0.7805
Pt    0.2108    0.3038    0.8710
Pt    0.2113    0.3017    0.8252
Pt    0.2119    0.3022    0.7791
Pt    0.1674    0.4838    0.8266
Pt    0.1668    0.4836    0.7796
Pt    0.1660    0.4351    0.8255
Pt    0.1653    0.4371    0.7816
Pt    0.0548    0.3018    0.8032
Pt    0.0546    0.3029    0.8482
Pt    0.1657    0.3492    0.8260
Pt    0.0546    0.3488    0.8040
Pt    0.1653    0.3029    0.8259
Pt    0.0536    0.3943    0.8036
Pt    0.1664    0.3034    0.7821
Pt    0.0514    0.4382    0.8042
Pt    0.0513    0.4370    0.8488
Pt    0.1225    0.4849    0.7811
Pt    0.0529    0.4834    0.8042
Pt    0.0542    0.4838    0.8502
Pt    0.1221    0.4390    0.8267
Pt    0.0984    0.3026    0.8040
Pt    0.1214    0.4399    0.7802
Pt    0.0990    0.4389    0.8033
Pt    0.1005    0.4390    0.8481
Pt    0.1186    0.3019    0.8267
Pt    0.0998    0.4861    0.8052
Pt    0.1211    0.3030    0.7798
Pt    0.1439    0.3040    0.8038
Pt    0.0786    0.4838    0.8723
Pt    0.1440    0.4354    0.8030
Pt    0.0766    0.4851    0.8271
Pt    0.1455    0.4835    0.8056
Pt    0.0769    0.4845    0.7821
Pt    0.1885    0.3023    0.8037
Pt    0.1864    0.3019    0.8490
Pt    0.0767    0.4389    0.8707
Pt    0.1883    0.3489    0.8032
Pt    0.1891    0.3475    0.8478
Pt    0.1877    0.3930    0.8047
Pt    0.0772    0.4390    0.8262
Pt    0.1881    0.4360    0.8042
Pt    0.1879    0.4370    0.8499
Pt    0.0781    0.4370    0.7799
Pt    0.1891    0.4834    0.8045
Pt    0.1890    0.4837    0.8493
Pt    0.0766    0.3947    0.8256
Pt    0.2344    0.3038    0.8022
Pt    0.2345    0.3012    0.8491
Pt    0.0769    0.3493    0.8257
Pt    0.2328    0.3484    0.8027
Pt    0.0775    0.3479    0.7810
Pt    0.2345    0.3930    0.8051
Pt    0.0768    0.3038    0.8696
Pt    0.2343    0.4356    0.8043
Pt    0.2369    0.4365    0.8516
Pt    0.0764    0.3031    0.8271
Pt    0.2341    0.4834    0.8032
Pt    0.2341    0.4830    0.8480
Pt    0.0754    0.3026    0.7796
Pt    0.0298    0.2792    0.8036
Pt    0.0306    0.2788    0.8475
Pt    0.0310    0.4828    0.8718
Pt    0.0315    0.3261    0.8042
Pt    0.0319    0.3274    0.8494
Pt    0.0307    0.4833    0.8268
Pt    0.0320    0.3718    0.8055
Pt    0.0299    0.4854    0.7818
Pt    0.0292    0.4159    0.8045
Pt    0.0302    0.4395    0.8268
Pt    0.0295    0.4612    0.8027
Pt    0.0312    0.4616    0.8489
Pt    0.0304    0.4369    0.7802
Pt    0.2348    0.5065    0.8693
Pt    0.2565    0.3033    0.8716
Pt    0.0331    0.3941    0.8291
Pt    0.0770    0.2789    0.8046
Pt    0.0765    0.2786    0.8493
Pt    0.0312    0.3919    0.7822
Pt    0.0774    0.3269    0.8037
Pt    0.0762    0.3267    0.8490
Pt    0.0774    0.3729    0.8048
Pt    0.0322    0.3502    0.8276
Pt    0.0775    0.4164    0.8035
Pt    0.0777    0.4169    0.8489
Pt    0.0297    0.3492    0.7835
Pt    0.0766    0.4613    0.8038
Pt    0.0784    0.4621    0.8495
Pt    0.0311    0.3031    0.8710
Pt    0.0549    0.4386    0.7583
Pt    0.0084    0.3492    0.8057
Pt    0.0312    0.3037    0.8268
Pt    0.1225    0.2795    0.8036
Pt    0.0300    0.2999    0.7802
Pt    0.1205    0.3269    0.8052
Pt    0.2110    0.3252    0.7581
Pt    0.1228    0.4613    0.8055
Pt    0.0297    0.5069    0.8060
Pt    0.0305    0.4150    0.7576
Pt    0.1906    0.5062    0.7797
Pt    0.1657    0.2789    0.8032
Pt    0.2357    0.5051    0.8248
Pt    0.1646    0.3271    0.8038
Pt    0.1668    0.3260    0.8493
Pt    0.2109    0.3716    0.8043
Pt    0.1673    0.4606    0.8036
Pt    0.2099    0.3245    0.8472
Pt    0.2107    0.3253    0.8024
Pt    0.0295    0.3257    0.7574
Pt    0.2105    0.2804    0.8028
Pt    0.2107    0.2805    0.8478
Pt    0.0995    0.5069    0.8300
Pt    0.0534    0.5045    0.7809
Pt    0.1442    0.4376    0.7583
Pt    0.1883    0.2592    0.8472
Pt    0.2139    0.5061    0.8476
Pt    0.0078    0.5061    0.8719
Pt    0.0298    0.3708    0.7589
Pt    0.0534    0.5067    0.8723
Pt    0.2108    0.3720    0.7583
Pt    0.2125    0.5060    0.8048
Pt    0.0076    0.4600    0.7801
Pt    0.2352    0.5053    0.7795
Pt    0.2554    0.3467    0.8275
Pt    0.1459    0.5056    0.7798
Pt    0.2571    0.2785    0.8032
Pt    0.0308    0.5051    0.7582
Pt    0.0315    0.4607    0.7587
Pt    0.0091    0.4834    0.7593
Pt    0.2346    0.3940    0.7585
Pt    0.0514    0.3482    0.7606
Pt    0.0081    0.4374    0.7577
Pt    0.0773    0.4604    0.7600
Pt    0.1870    0.3498    0.7583
Pt    0.2344    0.3469    0.7582
Pt    0.1206    0.5047    0.7582
Pt    0.1437    0.3036    0.7579
Pt    0.0089    0.3262    0.9604
Pt    0.0079    0.3925    0.9372
Pt    0.1679    0.4846    0.0052
Pt    0.1871    0.3260    0.0065
Pt    0.0082    0.4395    0.9851
Pt    0.0531    0.4167    0.0057
Pt    0.0331    0.2577    0.9149
Pt    0.2343    0.4604    0.0066
Pt    0.2124    0.4846    0.9606
Pt    0.2116    0.4846    0.9145
Pt    0.0565    0.2784    0.9151
Pt    0.0540    0.2790    0.9607
Pt    0.0542    0.3282    0.9134
Pt    0.0543    0.3275    0.9604
Pt    0.0529    0.3717    0.9618
Pt    0.0540    0.4144    0.9612
Pt    0.0537    0.4600    0.9153
Pt    0.0544    0.4615    0.9608
Pt    0.1217    0.2584    0.9607
Pt    0.0080    0.4825    0.9386
Pt    0.0984    0.2798    0.9611
Pt    0.0999    0.3255    0.9159
Pt    0.0997    0.3281    0.9612
Pt    0.1000    0.4599    0.9617
Pt    0.2094    0.2572    0.9150
Pt    0.1442    0.2794    0.9614
Pt    0.1438    0.3262    0.9621
Pt    0.1437    0.4615    0.9614
Pt    0.0095    0.4612    0.9616
Pt    0.1870    0.2778    0.9144
Pt    0.1890    0.2806    0.9597
Pt    0.1892    0.3266    0.9141
Pt    0.1889    0.3277    0.9619
Pt    0.1894    0.3713    0.9592
Pt    0.1880    0.4164    0.9146
Pt    0.1892    0.4158    0.9583
Pt    0.1863    0.4621    0.9158
Pt    0.1882    0.4608    0.9606
Pt    0.1214    0.4811    0.0067
Pt    0.0085    0.4372    0.9372
Pt    0.2339    0.2792    0.9122
Pt    0.2350    0.2805    0.9597
Pt    0.2349    0.3266    0.9154
Pt    0.2344    0.3240    0.9598
Pt    0.2349    0.3722    0.9590
Pt    0.2357    0.4153    0.9600
Pt    0.2337    0.4606    0.9147
Pt    0.2343    0.4613    0.9592
Pt    0.0081    0.3931    0.9846
Pt    0.0297    0.3031    0.0070
Pt    0.2104    0.4373    0.9603
Pt    0.2096    0.4389    0.9152
Pt    0.2128    0.3937    0.9597
Pt    0.2124    0.3482    0.9595
Pt    0.2112    0.3024    0.9596
Pt    0.2116    0.3035    0.9132
Pt    0.1661    0.4841    0.9600
Pt    0.1660    0.4391    0.9600
Pt    0.1655    0.4384    0.9153
Pt    0.1668    0.3046    0.9598
Pt    0.1224    0.4848    0.9592
Pt    0.1213    0.4358    0.9590
Pt    0.0544    0.3041    0.8925
Pt    0.0541    0.3037    0.9365
Pt    0.0543    0.3032    0.9849
Pt    0.0535    0.3512    0.9360
Pt    0.0533    0.3494    0.9855
Pt    0.0543    0.3921    0.9380
Pt    0.0540    0.3922    0.9839
Pt    0.0551    0.4385    0.8948
Pt    0.0545    0.4365    0.9389
Pt    0.0540    0.4393    0.9833
Pt    0.0549    0.4826    0.8929
Pt    0.0542    0.4838    0.9381
Pt    0.0542    0.4843    0.9839
Pt    0.0993    0.3046    0.9388
Pt    0.1007    0.3050    0.9837
Pt    0.0984    0.3491    0.9383
Pt    0.0989    0.4384    0.9378
Pt    0.1010    0.4356    0.9845
Pt    0.1006    0.4845    0.9369
Pt    0.1016    0.4838    0.9824
Pt    0.1439    0.3042    0.9381
Pt    0.1437    0.3039    0.9850
Pt    0.1442    0.4383    0.9379
Pt    0.1443    0.4834    0.9839
Pt    0.1876    0.3030    0.8933
Pt    0.1903    0.3032    0.9355
Pt    0.1881    0.3040    0.9843
Pt    0.1904    0.3485    0.9378
Pt    0.1868    0.3508    0.9829
Pt    0.1886    0.3922    0.9359
Pt    0.1895    0.3935    0.9820
Pt    0.1881    0.4382    0.8932
Pt    0.1874    0.4381    0.9369
Pt    0.1894    0.4372    0.9824
Pt    0.1861    0.4847    0.8922
Pt    0.1892    0.4846    0.9383
Pt    0.1905    0.4851    0.9835
Pt    0.2331    0.3047    0.8921
Pt    0.2353    0.3021    0.9371
Pt    0.2330    0.3022    0.9841
Pt    0.2356    0.3483    0.9381
Pt    0.2344    0.3467    0.9819
Pt    0.2350    0.3932    0.9843
Pt    0.2336    0.4364    0.8939
Pt    0.2326    0.4373    0.9362
Pt    0.2348    0.4388    0.9821
Pt    0.2350    0.4835    0.8932
Pt    0.2355    0.4842    0.9377
Pt    0.2351    0.4837    0.9836
Pt    0.0325    0.2796    0.8937
Pt    0.0330    0.2814    0.9360
Pt    0.0323    0.2795    0.9844
Pt    0.0312    0.3261    0.9362
Pt    0.0309    0.3259    0.9836
Pt    0.0306    0.3707    0.9387
Pt    0.0299    0.3707    0.9852
Pt    0.0318    0.4135    0.9359
Pt    0.0295    0.4170    0.9847
Pt    0.0297    0.4590    0.8924
Pt    0.0304    0.4603    0.9384
Pt    0.0325    0.4628    0.9848
Pt    0.0762    0.4370    0.0060
Pt    0.0082    0.3486    0.9361
Pt    0.0083    0.2800    0.0069
Pt    0.0778    0.2790    0.9386
Pt    0.0759    0.2798    0.9847
Pt    0.0777    0.3263    0.8932
Pt    0.0760    0.3270    0.9372
Pt    0.0767    0.3282    0.9842
Pt    0.0758    0.3721    0.9381
Pt    0.0787    0.3703    0.9843
Pt    0.0771    0.4151    0.9398
Pt    0.0777    0.4153    0.9832
Pt    0.0791    0.4616    0.8940
Pt    0.0762    0.4606    0.9370
Pt    0.0774    0.4620    0.9823
Pt    0.2107    0.4373    0.0055
Pt    0.0088    0.2804    0.9161
Pt    0.2109    0.3029    0.0064
Pt    0.1203    0.2812    0.9385
Pt    0.1205    0.2807    0.9848
Pt    0.1230    0.3258    0.9395
Pt    0.1218    0.4612    0.9390
Pt    0.1232    0.4589    0.9825
Pt    0.0080    0.4592    0.9147
Pt    0.1658    0.2817    0.9361
Pt    0.1651    0.2810    0.9836
Pt    0.1684    0.3264    0.9383
Pt    0.1652    0.3269    0.9847
Pt    0.1655    0.4159    0.9375
Pt    0.1638    0.4627    0.9368
Pt    0.1669    0.4604    0.9842
Pt    0.1446    0.4605    0.0062
Pt    0.0081    0.4832    0.8929
Pt    0.2089    0.2811    0.8916
Pt    0.2117    0.2796    0.9367
Pt    0.2130    0.2798    0.9836
Pt    0.2119    0.3279    0.8929
Pt    0.2125    0.3266    0.9374
Pt    0.2117    0.3250    0.9846
Pt    0.2117    0.3715    0.9368
Pt    0.2120    0.3707    0.9810
Pt    0.2127    0.4128    0.9368
Pt    0.2119    0.4146    0.9838
Pt    0.2093    0.4621    0.8929
Pt    0.2109    0.4608    0.9370
Pt    0.2129    0.4615    0.9834
Pt    0.0081    0.4853    0.9849
Pt    0.0989    0.4599    0.0047
Pt    0.1865    0.3720    0.0050
Pt    0.0787    0.4856    0.9593
Pt    0.1655    0.2584    0.9611
Pt    0.1665    0.4371    0.0061
Pt    0.0987    0.3261    0.0073
Pt    0.0092    0.4163    0.9608
Pt    0.2572    0.3029    0.9143
Pt    0.2336    0.3702    0.0062
Pt    0.0765    0.3493    0.9137
Pt    0.0777    0.4854    0.9167
Pt    0.0771    0.4354    0.9159
Pt    0.2115    0.3925    0.0065
Pt    0.0767    0.4373    0.9619
Pt    0.0785    0.3926    0.9610
Pt    0.0772    0.3510    0.9596
Pt    0.1216    0.3028    0.9612
Pt    0.0312    0.3056    0.9137
Pt    0.0309    0.3033    0.9619
Pt    0.0314    0.3491    0.9598
Pt    0.0305    0.3928    0.9608
Pt    0.0324    0.4373    0.9155
Pt    0.0321    0.4379    0.9605
Pt    0.0319    0.4832    0.9162
Pt    0.0316    0.4844    0.9602
Pt    0.0775    0.3018    0.9145
Pt    0.0771    0.3037    0.9613
Pt    0.2552    0.4364    0.9163
Pt    0.1426    0.2580    0.9357
Pt    0.2098    0.3493    0.0052
Pt    0.0541    0.4614    0.0072
Pt    0.2555    0.3251    0.9847
Pt    0.0084    0.5064    0.9161
Pt    0.2352    0.2577    0.9383
Pt    0.0075    0.3048    0.8925
Pt    0.2565    0.4585    0.9372
Pt    0.0773    0.4849    0.0051
Pt    0.0096    0.3041    0.9385
Pt    0.1430    0.5066    0.0053
Pt    0.0097    0.2797    0.9616
Pt    0.2346    0.2578    0.9844
Pt    0.0080    0.3021    0.9838
Pt    0.0090    0.2571    0.8944
Pt    0.0077    0.3706    0.9609
Pt    0.1881    0.4150    0.0059
Pt    0.0307    0.5064    0.8936
Pt    0.0079    0.3253    0.0070
Pt    0.1912    0.4604    0.0069
Pt    0.1428    0.2577    0.9835
Pt    0.0761    0.3046    0.0060
Pt    0.2567    0.3474    0.9603
Pt    0.2572    0.4162    0.9847
Pt    0.2547    0.3275    0.8914
Pt    0.0319    0.5063    0.9848
Pt    0.2362    0.5068    0.9154
Pt    0.1035    0.5066    0.0065
Pt    0.1884    0.5067    0.9611
Pt    0.0982    0.2803    0.0060
Pt    0.2333    0.3252    0.0066
Pt    0.2347    0.2800    0.0055
Pt    0.0777    0.5777    0.0535
Pt    0.0787    0.5297    0.0991
Pt    0.1425    0.7317    0.0097
Pt    0.0307    0.7126    0.0087
Pt    0.0311    0.5075    0.0321
Pt    0.0778    0.6665    0.0094
Pt    0.0087    0.5532    0.0542
Pt    0.0770    0.5307    0.0531
Pt    0.0078    0.5982    0.0537
Pt    0.0085    0.5307    0.0309
Pt    0.2105    0.5326    0.0079
Pt    0.0078    0.6447    0.0560
Pt    0.0077    0.6666    0.0317
Pt    0.0092    0.6899    0.0538
Pt    0.0554    0.5545    0.0546
Pt    0.0537    0.5545    0.1004
Pt    0.0553    0.5080    0.0997
Pt    0.0524    0.5986    0.0543
Pt    0.0563    0.6422    0.0087
Pt    0.0540    0.6450    0.0544
Pt    0.0090    0.7110    0.0314
Pt    0.0547    0.6878    0.0553
Pt    0.0526    0.6883    0.1026
Pt    0.1439    0.5089    0.0564
Pt    0.0548    0.7338    0.0551
Pt    0.0542    0.7354    0.1000
Pt    0.0075    0.7338    0.0537
Pt    0.1001    0.5544    0.0535
Pt    0.1868    0.6011    0.0075
Pt    0.1015    0.6841    0.0510
Pt    0.0989    0.6882    0.0999
Pt    0.0083    0.6229    0.0321
Pt    0.1004    0.7329    0.0543
Pt    0.0078    0.7564    0.1223
Pt    0.1442    0.5519    0.0529
Pt    0.1442    0.6870    0.0554
Pt    0.0094    0.5306    0.0770
Pt    0.1437    0.7315    0.0552
Pt    0.0544    0.5085    0.0538
Pt    0.1871    0.5536    0.0522
Pt    0.1854    0.5531    0.0993
Pt    0.0754    0.7116    0.0087
Pt    0.1869    0.5990    0.0548
Pt    0.1868    0.5982    0.0988
Pt    0.2330    0.5081    0.0984
Pt    0.1874    0.6430    0.0543
Pt    0.2091    0.5089    0.0756
Pt    0.1898    0.6886    0.0546
Pt    0.1893    0.6889    0.0985
Pt    0.0774    0.6664    0.0991
Pt    0.1883    0.7345    0.0524
Pt    0.1871    0.7310    0.0994
Pt    0.0294    0.5762    0.0993
Pt    0.2338    0.5543    0.0541
Pt    0.2347    0.5534    0.1005
Pt    0.0764    0.5782    0.0988
Pt    0.2341    0.5993    0.0568
Pt    0.1669    0.7106    0.0543
Pt    0.2357    0.6410    0.0571
Pt    0.1636    0.5753    0.0999
Pt    0.2350    0.6884    0.0532
Pt    0.2338    0.6852    0.0987
Pt    0.1643    0.5764    0.0520
Pt    0.2335    0.7344    0.0542
Pt    0.2332    0.7359    0.0980
Pt    0.2117    0.7115    0.0984
Pt    0.2111    0.7118    0.0530
Pt    0.1652    0.5294    0.0537
Pt    0.2108    0.6638    0.0548
Pt    0.1208    0.7091    0.0557
Pt    0.2105    0.6213    0.0554
Pt    0.1230    0.5771    0.0534
Pt    0.2104    0.5743    0.0985
Pt    0.2121    0.5777    0.0547
Pt    0.1223    0.5300    0.0537
Pt    0.2104    0.5309    0.0989
Pt    0.2096    0.5323    0.0536
Pt    0.0548    0.5294    0.0301
Pt    0.0548    0.5301    0.0776
Pt    0.0568    0.5311    0.1223
Pt    0.0552    0.5762    0.0305
Pt    0.0544    0.5766    0.0781
Pt    0.0534    0.5776    0.1214
Pt    0.0535    0.6219    0.0299
Pt    0.0542    0.6205    0.0770
Pt    0.0534    0.6652    0.0315
Pt    0.0544    0.6660    0.0793
Pt    0.0525    0.7125    0.0317
Pt    0.0544    0.7119    0.0783
Pt    0.0547    0.7113    0.1231
Pt    0.0983    0.5293    0.0301
Pt    0.1005    0.5309    0.0753
Pt    0.1002    0.5783    0.0319
Pt    0.0987    0.5755    0.0769
Pt    0.0985    0.6657    0.0766
Pt    0.1010    0.7094    0.0302
Pt    0.0999    0.7117    0.0779
Pt    0.1421    0.5295    0.0311
Pt    0.1429    0.5775    0.0767
Pt    0.1435    0.7079    0.0315
Pt    0.1459    0.7069    0.0810
Pt    0.1861    0.5318    0.0295
Pt    0.1860    0.5318    0.0774
Pt    0.1894    0.5298    0.1222
Pt    0.1880    0.5772    0.0307
Pt    0.1869    0.5761    0.0755
Pt    0.1886    0.5759    0.1218
Pt    0.1884    0.6206    0.0323
Pt    0.1874    0.6209    0.0769
Pt    0.1879    0.6663    0.0318
Pt    0.1908    0.6652    0.0771
Pt    0.1892    0.7125    0.0292
Pt    0.1886    0.7114    0.0761
Pt    0.1885    0.7119    0.1217
Pt    0.2341    0.5317    0.0312
Pt    0.2332    0.5307    0.0756
Pt    0.2342    0.5304    0.1222
Pt    0.2338    0.5775    0.0300
Pt    0.2339    0.5757    0.0768
Pt    0.2328    0.5782    0.1211
Pt    0.2349    0.6211    0.0326
Pt    0.2339    0.6644    0.0334
Pt    0.2351    0.6637    0.0778
Pt    0.2347    0.7122    0.0309
Pt    0.2358    0.7110    0.0774
Pt    0.2349    0.7109    0.1198
Pt    0.0323    0.5541    0.0307
Pt    0.0313    0.5528    0.0766
Pt    0.0317    0.5524    0.1215
Pt    0.0310    0.5974    0.0310
Pt    0.0309    0.5995    0.0792
Pt    0.0300    0.6443    0.0316
Pt    0.0325    0.6442    0.0785
Pt    0.0315    0.6896    0.0300
Pt    0.0312    0.6876    0.0788
Pt    0.0314    0.7353    0.0314
Pt    0.0306    0.7327    0.0768
Pt    0.0320    0.7340    0.1211
Pt    0.0784    0.5529    0.0295
Pt    0.0766    0.5529    0.0784
Pt    0.0800    0.5540    0.1193
Pt    0.0763    0.5983    0.0285
Pt    0.0769    0.5995    0.0760
Pt    0.0783    0.6444    0.0306
Pt    0.0765    0.6424    0.0775
Pt    0.0762    0.6882    0.0321
Pt    0.0764    0.6896    0.0783
Pt    0.0771    0.6894    0.1236
Pt    0.0757    0.7342    0.0305
Pt    0.0778    0.7345    0.0770
Pt    0.1208    0.5541    0.0303
Pt    0.1208    0.5536    0.0754
Pt    0.1206    0.6871    0.0775
Pt    0.1220    0.7323    0.0318
Pt    0.1231    0.7322    0.0780
Pt    0.1631    0.5558    0.0286
Pt    0.1647    0.5539    0.0758
Pt    0.1647    0.5988    0.0768
Pt    0.1672    0.6883    0.0311
Pt    0.1680    0.6861    0.0759
Pt    0.1663    0.7336    0.0307
Pt    0.1640    0.7333    0.0781
Pt    0.2111    0.5553    0.0314
Pt    0.2092    0.5526    0.0765
Pt    0.2103    0.5543    0.1214
Pt    0.2108    0.5999    0.0305
Pt    0.2114    0.5999    0.0810
Pt    0.2104    0.6439    0.0305
Pt    0.2107    0.6417    0.0791
Pt    0.2106    0.6890    0.0315
Pt    0.2123    0.6879    0.0773
Pt    0.2115    0.6873    0.1209
Pt    0.2105    0.7349    0.0286
Pt    0.2102    0.7350    0.0754
Pt    0.2108    0.7351    0.1216
Pt    0.0789    0.5077    0.0763
Pt    0.0783    0.5757    0.0074
Pt    0.0309    0.7113    0.1000
Pt    0.0085    0.6208    0.0783
Pt    0.1656    0.5072    0.0297
Pt    0.1875    0.5079    0.0995
Pt    0.0329    0.7114    0.0561
Pt    0.0751    0.6203    0.0515
Pt    0.0302    0.6671    0.0551
Pt    0.0079    0.5080    0.0980
Pt    0.0767    0.6658    0.0559
Pt    0.0313    0.6211    0.0545
Pt    0.0783    0.7132    0.1008
Pt    0.0329    0.5312    0.0540
Pt    0.0331    0.5305    0.1009
Pt    0.0787    0.7107    0.0543
Pt    0.0291    0.5758    0.0544
Pt    0.0081    0.6890    0.0992
Pt    0.1878    0.5093    0.0520
Pt    0.0777    0.5075    0.0311
Pt    0.1004    0.7557    0.0776
Pt    0.1002    0.6880    0.0076
Pt    0.2572    0.5749    0.0988
Pt    0.0318    0.5084    0.0759
Pt    0.2569    0.6882    0.0770
Pt    0.1437    0.7560    0.0312
Pt    0.2117    0.5085    0.0311
Pt    0.0530    0.5991    0.0076
Pt    0.2567    0.5535    0.1218
Pt    0.1228    0.7081    0.0077
Pt    0.0084    0.5083    0.0093
Pt    0.2355    0.5530    0.0084
Pt    0.0079    0.5083    0.0537
Pt    0.2117    0.6664    0.0076
Pt    0.2342    0.5074    0.0529
Pt    0.1657    0.7557    0.0545
Pt    0.0539    0.7360    0.0077
Pt    0.1661    0.7557    0.0074
Pt    0.1664    0.7113    0.0078
Pt    0.0558    0.6889    0.0081
Pt    0.0085    0.7549    0.0771
Pt    0.2349    0.7350    0.0075
Pt    0.0303    0.7566    0.0998
Pt    0.0769    0.7554    0.0075
Pt    0.1863    0.7559    0.0772
Pt    0.0084    0.7569    0.0300
Pt    0.0531    0.7560    0.0769
Pt    0.2356    0.7567    0.0303
Pt    0.1882    0.6429    0.0078
Pt    0.0992    0.7328    0.0099
Pt    0.0781    0.5305    0.0073
Pt    0.0536    0.5537    0.0078
Pt    0.0787    0.5072    0.1232
Pt    0.1900    0.6894    0.0076
Pt    0.0322    0.6658    0.0093
Pt    0.2347    0.6870    0.0080
Pt    0.0791    0.6206    0.0077
Pt    0.2344    0.6424    0.0081
Pt    0.2335    0.5087    0.0075
Pt    0.1639    0.5312    0.0080
Pt    0.0077    0.6444    0.0080
Pt    0.0075    0.7111    0.0763
Pt    0.1221    0.7570    0.0548
Pt    0.0781    0.7569    0.0991
Pt    0.1666    0.5072    0.0767
Pt    0.0078    0.6884    0.0073
Pt    0.0543    0.5078    0.0074
Pt    0.0078    0.6629    0.2105
Pt    0.2345    0.5299    0.2551
Pt    0.0095    0.5299    0.1663
Pt    0.0088    0.7317    0.1440
Pt    0.0095    0.5981    0.2349
Pt    0.0092    0.6831    0.1852
Pt    0.0094    0.5532    0.1875
Pt    0.2567    0.5771    0.2337
Pt    0.1242    0.5073    0.2092
Pt    0.1664    0.5079    0.2110
Pt    0.0080    0.7339    0.2324
Pt    0.0087    0.5551    0.1417
Pt    0.0537    0.5551    0.1429
Pt    0.0548    0.5532    0.1883
Pt    0.0546    0.5524    0.2347
Pt    0.0537    0.5988    0.1871
Pt    0.0547    0.5992    0.2333
Pt    0.0560    0.6431    0.1869
Pt    0.0542    0.6429    0.2335
Pt    0.0542    0.6875    0.1435
Pt    0.0532    0.6869    0.1867
Pt    0.0538    0.6873    0.2342
Pt    0.0563    0.7352    0.1431
Pt    0.0539    0.7335    0.1888
Pt    0.0524    0.7349    0.2349
Pt    0.1062    0.5493    0.1845
Pt    0.1008    0.5547    0.2350
Pt    0.1001    0.5988    0.1903
Pt    0.0990    0.6889    0.1866
Pt    0.0993    0.6892    0.2358
Pt    0.0989    0.7332    0.1886
Pt    0.1005    0.7325    0.2345
Pt    0.1437    0.5537    0.1865
Pt    0.1442    0.5530    0.2345
Pt    0.1440    0.6882    0.1863
Pt    0.1439    0.6869    0.2337
Pt    0.1417    0.7334    0.1877
Pt    0.1432    0.7346    0.2334
Pt    0.1887    0.5540    0.1445
Pt    0.1876    0.5555    0.1868
Pt    0.1890    0.5539    0.2342
Pt    0.1891    0.5978    0.1859
Pt    0.1894    0.6001    0.2342
Pt    0.1873    0.6444    0.1857
Pt    0.1891    0.6895    0.1432
Pt    0.1900    0.6896    0.1871
Pt    0.1895    0.6890    0.2348
Pt    0.1891    0.7357    0.1877
Pt    0.1881    0.7333    0.2346
Pt    0.2344    0.5556    0.1423
Pt    0.2350    0.5541    0.1877
Pt    0.2349    0.5528    0.2328
Pt    0.2343    0.6007    0.1882
Pt    0.2358    0.5999    0.2344
Pt    0.2338    0.6423    0.2323
Pt    0.2365    0.6887    0.1418
Pt    0.2337    0.6882    0.1868
Pt    0.2344    0.6878    0.2345
Pt    0.2340    0.7352    0.1440
Pt    0.2339    0.7330    0.1894
Pt    0.2343    0.7345    0.2344
Pt    0.2109    0.7107    0.2333
Pt    0.2107    0.7113    0.1876
Pt    0.2112    0.7124    0.1433
Pt    0.2102    0.6656    0.2341
Pt    0.2103    0.6655    0.1862
Pt    0.2103    0.6216    0.2319
Pt    0.2109    0.6222    0.1846
Pt    0.2113    0.5775    0.2336
Pt    0.2119    0.5780    0.1865
Pt    0.2103    0.5803    0.1447
Pt    0.2111    0.5316    0.2341
Pt    0.2093    0.5303    0.1875
Pt    0.2117    0.5305    0.1447
Pt    0.0545    0.5321    0.1664
Pt    0.0552    0.5300    0.2117
Pt    0.0806    0.5084    0.1644
Pt    0.0548    0.5761    0.1654
Pt    0.0533    0.5767    0.2109
Pt    0.0094    0.5762    0.1654
Pt    0.0547    0.6212    0.2105
Pt    0.0092    0.5750    0.2104
Pt    0.0540    0.6643    0.2115
Pt    0.1890    0.5080    0.2339
Pt    0.0539    0.7092    0.1654
Pt    0.0541    0.7107    0.2107
Pt    0.0769    0.5767    0.2340
Pt    0.1017    0.5310    0.2089
Pt    0.0083    0.7314    0.1868
Pt    0.1000    0.5749    0.1658
Pt    0.0989    0.5771    0.2129
Pt    0.2092    0.6416    0.2548
Pt    0.0990    0.7099    0.2119
Pt    0.2103    0.5076    0.2094
Pt    0.1442    0.5311    0.2099
Pt    0.0086    0.5077    0.2368
Pt    0.1435    0.5762    0.2106
Pt    0.0083    0.6205    0.2104
Pt    0.1417    0.7091    0.2097
Pt    0.0075    0.7549    0.1659
Pt    0.1869    0.5310    0.1645
Pt    0.1884    0.5307    0.2105
Pt    0.2569    0.5543    0.1653
Pt    0.1847    0.5775    0.1638
Pt    0.1883    0.5789    0.2109
Pt    0.2353    0.5758    0.2557
Pt    0.1893    0.6217    0.2085
Pt    0.1880    0.6664    0.1638
Pt    0.1843    0.6636    0.2139
Pt    0.2559    0.5081    0.2559
Pt    0.1877    0.7148    0.1651
Pt    0.1877    0.7125    0.2106
Pt    0.0293    0.6879    0.2567
Pt    0.2341    0.5302    0.1651
Pt    0.2342    0.5290    0.2109
Pt    0.1444    0.5078    0.2350
Pt    0.2347    0.5798    0.1640
Pt    0.2359    0.5761    0.2105
Pt    0.0085    0.6438    0.2338
Pt    0.2342    0.6243    0.2065
Pt    0.2565    0.5780    0.1872
Pt    0.2343    0.6646    0.2108
Pt    0.0768    0.5763    0.1894
Pt    0.2342    0.7106    0.1649
Pt    0.2349    0.7114    0.2122
Pt    0.0784    0.5327    0.1440
Pt    0.0310    0.5544    0.1651
Pt    0.0314    0.5531    0.2118
Pt    0.0305    0.7108    0.2328
Pt    0.0289    0.5994    0.2100
Pt    0.0083    0.5314    0.2119
Pt    0.0324    0.6432    0.2101
Pt    0.0760    0.7112    0.2335
Pt    0.0317    0.6873    0.1635
Pt    0.0306    0.6861    0.2106
Pt    0.0984    0.7570    0.2112
Pt    0.0328    0.7322    0.1646
Pt    0.0306    0.7345    0.2101
Pt    0.0772    0.7101    0.1878
Pt    0.0794    0.5538    0.1685
Pt    0.0791    0.5543    0.2120
Pt    0.0544    0.5074    0.1879
Pt    0.0769    0.5985    0.1657
Pt    0.0783    0.5997    0.2130
Pt    0.0535    0.5308    0.2573
Pt    0.0777    0.6441    0.2100
Pt    0.0765    0.6870    0.1644
Pt    0.0767    0.6870    0.2106
Pt    0.0540    0.5076    0.2347
Pt    0.0774    0.7345    0.1660
Pt    0.0753    0.7333    0.2125
Pt    0.0098    0.5998    0.1857
Pt    0.1217    0.5538    0.2110
Pt    0.0291    0.7084    0.1870
Pt    0.1204    0.6855    0.2112
Pt    0.0778    0.7129    0.1428
Pt    0.1213    0.7342    0.2116
Pt    0.1232    0.7102    0.2355
Pt    0.1666    0.5543    0.2105
Pt    0.1020    0.5073    0.1886
Pt    0.1673    0.6892    0.1656
Pt    0.1666    0.6892    0.2089
Pt    0.0309    0.7090    0.1409
Pt    0.1641    0.7328    0.2119
Pt    0.2570    0.6230    0.2335
Pt    0.2120    0.5548    0.1657
Pt    0.2116    0.5545    0.2092
Pt    0.1206    0.7100    0.1857
Pt    0.2129    0.6002    0.2096
Pt    0.0315    0.6648    0.2356
Pt    0.2104    0.6442    0.2090
Pt    0.1221    0.5305    0.2341
Pt    0.2132    0.6872    0.1625
Pt    0.2120    0.6882    0.2106
Pt    0.1656    0.7110    0.2348
Pt    0.2110    0.7359    0.1652
Pt    0.2113    0.7329    0.2113
Pt    0.0779    0.5768    0.1433
Pt    0.0777    0.6629    0.2345
Pt    0.0766    0.6646    0.1863
Pt    0.0793    0.5297    0.1884
Pt    0.0782    0.6205    0.1894
Pt    0.1656    0.7131    0.1877
Pt    0.1231    0.5764    0.2354
Pt    0.1211    0.5765    0.1880
Pt    0.1674    0.6663    0.1880
Pt    0.1649    0.5770    0.1894
Pt    0.1661    0.5783    0.2331
Pt    0.1672    0.5316    0.2348
Pt    0.0776    0.5288    0.2345
Pt    0.1651    0.5298    0.1869
Pt    0.0324    0.5291    0.1438
Pt    0.0328    0.5299    0.1888
Pt    0.0302    0.5299    0.2354
Pt    0.0313    0.5767    0.1880
Pt    0.0316    0.5767    0.2347
Pt    0.0319    0.6219    0.1867
Pt    0.0314    0.6223    0.2343
Pt    0.0337    0.6637    0.1866
Pt    0.2539    0.6646    0.1866
Pt    0.2557    0.6868    0.2101
Pt    0.0083    0.5081    0.1437
Pt    0.2569    0.7346    0.2111
Pt    0.2573    0.7127    0.2345
Pt    0.0545    0.6665    0.2572
Pt    0.0995    0.5079    0.2349
Pt    0.0557    0.5086    0.1437
Pt    0.0525    0.7562    0.2121
Pt    0.0075    0.6437    0.1867
Pt    0.2572    0.7103    0.1874
Pt    0.2564    0.5772    0.1422
Pt    0.2566    0.6006    0.2101
Pt    0.2103    0.5541    0.2573
Pt    0.2345    0.5078    0.1889
Pt    0.2570    0.7569    0.2331
Pt    0.2343    0.7570    0.1676
Pt    0.1864    0.7558    0.2104
Pt    0.0758    0.7561    0.2343
Pt    0.0754    0.7566    0.1900
Pt    0.0305    0.5534    0.2569
Pt    0.2101    0.7570    0.2331
Pt    0.0295    0.7561    0.1880
Pt    0.2121    0.5981    0.2572
Pt    0.0543    0.7569    0.1671
Pt    0.0323    0.7560    0.1436
Pt    0.1665    0.7549    0.2360
Pt    0.0769    0.6880    0.2570
Pt    0.0074    0.7109    0.2548
Pt    0.2126    0.7342    0.2572
Pt    0.0989    0.7564    0.2570
Pt    0.1884    0.5783    0.2568
Pt    0.0994    0.5770    0.2563
Pt    0.0556    0.6215    0.2571
Pt    0.1446    0.5777    0.2567
Pt    0.0783    0.5522    0.2569
Pt    0.0285    0.7326    0.2566
Pt    0.0541    0.5075    0.2808
Pt    0.0076    0.5315    0.3502
Pt    0.1217    0.5075    0.3057
Pt    0.2569    0.7345    0.3027
Pt    0.0093    0.5987    0.2808
Pt    0.0075    0.5544    0.3269
Pt    0.0079    0.6446    0.2800
Pt    0.1896    0.7100    0.2579
Pt    0.0075    0.7350    0.3271
Pt    0.0550    0.5081    0.3268
Pt    0.0993    0.5297    0.2578
Pt    0.0081    0.5761    0.3036
Pt    0.0548    0.5517    0.2811
Pt    0.0534    0.5533    0.3259
Pt    0.0536    0.5550    0.3711
Pt    0.0545    0.5999    0.2818
Pt    0.0549    0.5991    0.3273
Pt    0.0558    0.6445    0.2793
Pt    0.0540    0.6432    0.3281
Pt    0.0557    0.6877    0.2817
Pt    0.0539    0.6884    0.3261
Pt    0.0516    0.6860    0.3733
Pt    0.0539    0.7343    0.2810
Pt    0.0520    0.7330    0.3269
Pt    0.0540    0.7331    0.3729
Pt    0.0990    0.5555    0.2803
Pt    0.0997    0.5531    0.3279
Pt    0.0988    0.5991    0.3256
Pt    0.1013    0.6886    0.2817
Pt    0.0978    0.6871    0.3298
Pt    0.0987    0.7342    0.2817
Pt    0.0985    0.7348    0.3290
Pt    0.1434    0.5536    0.2803
Pt    0.1435    0.5563    0.3248
Pt    0.1439    0.6872    0.2821
Pt    0.1437    0.6889    0.3314
Pt    0.1432    0.7338    0.2833
Pt    0.1426    0.7327    0.3315
Pt    0.1884    0.5539    0.2800
Pt    0.1863    0.5545    0.3253
Pt    0.1872    0.5523    0.3706
Pt    0.1860    0.6002    0.2805
Pt    0.1898    0.6013    0.3292
Pt    0.1870    0.6412    0.3285
Pt    0.1873    0.6870    0.2806
Pt    0.1879    0.6893    0.3275
Pt    0.1887    0.6871    0.3717
Pt    0.1895    0.7332    0.2803
Pt    0.1905    0.7338    0.3258
Pt    0.2346    0.5532    0.2802
Pt    0.2341    0.5555    0.3272
Pt    0.2338    0.5529    0.3701
Pt    0.2350    0.5987    0.2811
Pt    0.2351    0.5994    0.3256
Pt    0.2331    0.6435    0.2799
Pt    0.2331    0.6870    0.2829
Pt    0.2337    0.6871    0.3277
Pt    0.2334    0.6868    0.3728
Pt    0.2344    0.7350    0.2808
Pt    0.2335    0.7352    0.3257
Pt    0.2347    0.7332    0.3715
Pt    0.2107    0.7108    0.3712
Pt    0.2126    0.7096    0.3287
Pt    0.2110    0.7103    0.2807
Pt    0.2101    0.6639    0.3286
Pt    0.2085    0.6648    0.2801
Pt    0.2115    0.6222    0.3259
Pt    0.2094    0.6212    0.2787
Pt    0.2105    0.5784    0.3713
Pt    0.0546    0.5288    0.3035
Pt    0.0548    0.5313    0.3500
Pt    0.0539    0.5762    0.3045
Pt    0.0509    0.5796    0.3537
Pt    0.0542    0.6222    0.3032
Pt    0.0550    0.6643    0.3040
Pt    0.0535    0.7121    0.3041
Pt    0.0530    0.7103    0.3492
Pt    0.0998    0.5300    0.3037
Pt    0.0990    0.5765    0.3041
Pt    0.0993    0.5770    0.3494
Pt    0.0999    0.7100    0.3063
Pt    0.1413    0.5311    0.3036
Pt    0.1427    0.5785    0.3025
Pt    0.1431    0.7109    0.3073
Pt    0.1867    0.5307    0.3033
Pt    0.1865    0.5300    0.3487
Pt    0.1897    0.5778    0.3017
Pt    0.1871    0.5755    0.3490
Pt    0.1853    0.6210    0.3045
Pt    0.1864    0.6631    0.3034
Pt    0.1882    0.6645    0.3506
Pt    0.1892    0.7108    0.3054
Pt    0.1873    0.7152    0.3512
Pt    0.2344    0.5323    0.3039
Pt    0.2349    0.5296    0.3483
Pt    0.2351    0.5758    0.3031
Pt    0.2325    0.5781    0.3498
Pt    0.2340    0.6224    0.3034
Pt    0.2337    0.6635    0.3054
Pt    0.2348    0.7098    0.3047
Pt    0.2353    0.7099    0.3502
Pt    0.0316    0.5539    0.3033
Pt    0.0314    0.5551    0.3487
Pt    0.0310    0.5990    0.3031
Pt    0.0310    0.6443    0.3044
Pt    0.0302    0.6892    0.3037
Pt    0.0295    0.6866    0.3493
Pt    0.0297    0.7356    0.3037
Pt    0.0311    0.7345    0.3500
Pt    0.0770    0.5525    0.3045
Pt    0.0768    0.5528    0.3493
Pt    0.0783    0.6014    0.3017
Pt    0.0760    0.6013    0.3516
Pt    0.0769    0.6442    0.3036
Pt    0.0770    0.6878    0.3036
Pt    0.0737    0.6870    0.3501
Pt    0.0767    0.7338    0.3039
Pt    0.0749    0.7328    0.3492
Pt    0.1195    0.5536    0.3053
Pt    0.1213    0.6873    0.3091
Pt    0.1215    0.7335    0.3072
Pt    0.1641    0.5541    0.3028
Pt    0.1651    0.6873    0.3059
Pt    0.1668    0.6908    0.3508
Pt    0.1664    0.7335    0.3050
Pt    0.2113    0.5539    0.3033
Pt    0.2110    0.5542    0.3489
Pt    0.2112    0.5994    0.3021
Pt    0.2090    0.6425    0.3039
Pt    0.2104    0.6865    0.3056
Pt    0.2118    0.6862    0.3516
Pt    0.2123    0.7329    0.3032
Pt    0.2125    0.7340    0.3495
Pt    0.0088    0.5557    0.3724
Pt    0.0078    0.6011    0.3264
Pt    0.0770    0.5082    0.3513
Pt    0.0764    0.7568    0.3266
Pt    0.2339    0.6200    0.2581
Pt    0.1883    0.7561    0.3499
Pt    0.0089    0.5541    0.2808
Pt    0.2118    0.6886    0.2579
Pt    0.0301    0.5300    0.2814
Pt    0.0317    0.5318    0.3271
Pt    0.0306    0.5313    0.3719
Pt    0.0315    0.5753    0.2809
Pt    0.0307    0.5775    0.3272
Pt    0.0322    0.6223    0.2808
Pt    0.0324    0.6192    0.3267
Pt    0.0305    0.6658    0.2808
Pt    0.0309    0.6672    0.3285
Pt    0.0318    0.7126    0.2813
Pt    0.0288    0.7102    0.3276
Pt    0.0306    0.7094    0.3713
Pt    0.0775    0.5298    0.2814
Pt    0.0780    0.5299    0.3258
Pt    0.0781    0.5306    0.3718
Pt    0.0758    0.5754    0.2818
Pt    0.0759    0.5766    0.3276
Pt    0.0767    0.5767    0.3706
Pt    0.0768    0.6220    0.3260
Pt    0.0801    0.6655    0.2799
Pt    0.0774    0.6643    0.3274
Pt    0.0766    0.7110    0.2812
Pt    0.0773    0.7105    0.3278
Pt    0.0758    0.7082    0.3720
Pt    0.1216    0.5304    0.2817
Pt    0.1186    0.5790    0.2801
Pt    0.1218    0.5785    0.3274
Pt    0.1215    0.7102    0.2816
Pt    0.1200    0.7105    0.3312
Pt    0.1667    0.5292    0.2812
Pt    0.1641    0.5307    0.3261
Pt    0.1654    0.5769    0.2809
Pt    0.1678    0.5791    0.3226
Pt    0.1678    0.6649    0.3282
Pt    0.1665    0.7112    0.2818
Pt    0.1653    0.7129    0.3296
Pt    0.2112    0.5307    0.2821
Pt    0.2118    0.5311    0.3256
Pt    0.2097    0.5296    0.3697
Pt    0.2122    0.5765    0.2785
Pt    0.2113    0.5780    0.3260
Pt    0.0314    0.5077    0.3495
Pt    0.1897    0.5079    0.3261
Pt    0.2350    0.5082    0.2790
Pt    0.0533    0.7559    0.2574
Pt    0.0084    0.6235    0.3046
Pt    0.0320    0.6000    0.2586
Pt    0.0098    0.5782    0.3484
Pt    0.0096    0.6426    0.3280
Pt    0.1657    0.6890    0.2575
Pt    0.0074    0.7335    0.3713
Pt    0.1641    0.7332    0.2595
Pt    0.1013    0.5079    0.3264
Pt    0.1900    0.5301    0.2586
Pt    0.0310    0.5072    0.3038
Pt    0.0076    0.7356    0.2808
Pt    0.2561    0.7568    0.3730
Pt    0.1849    0.5082    0.3709
Pt    0.2570    0.7346    0.3492
Pt    0.1201    0.7556    0.2812
Pt    0.2112    0.7570    0.3737
Pt    0.0090    0.5311    0.2578
Pt    0.0303    0.7561    0.3725
Pt    0.1428    0.7085    0.2605
Pt    0.0077    0.5084    0.3268
Pt    0.1218    0.5530    0.2580
Pt    0.0089    0.6219    0.2586
Pt    0.2570    0.7093    0.3719
Pt    0.2570    0.6223    0.2815
Pt    0.2355    0.7093    0.2582
Pt    0.0542    0.5746    0.2591
Pt    0.1219    0.7568    0.3289
Pt    0.1654    0.7565    0.3273
Pt    0.0993    0.7103    0.2582
Pt    0.2333    0.7569    0.3504
Pt    0.0983    0.7557    0.3047
Pt    0.1428    0.7568    0.2593
Pt    0.1423    0.7563    0.3048
Pt    0.0085    0.5757    0.2586
Pt    0.0086    0.6891    0.2801
Pt    0.1214    0.7343    0.2585
Pt    0.0541    0.7565    0.3029
Pt    0.2567    0.5316    0.3246
Pt    0.0532    0.7557    0.3503
Pt    0.2572    0.7101    0.2823
Pt    0.2568    0.7356    0.2579
Pt    0.0311    0.5078    0.2578
Pt    0.2117    0.5080    0.2576
Pt    0.1450    0.5310    0.2581
Pt    0.1872    0.6661    0.2578
Pt    0.2564    0.6421    0.2582
Pt    0.1228    0.6851    0.2584
Pt    0.0758    0.5966    0.2584
Pt    0.2328    0.6635    0.2577
Pt    0.1648    0.5072    0.3059
Pt    0.2116    0.5072    0.3023
Pt    0.1669    0.5549    0.2575
Pt    0.0773    0.7334    0.2574
Pt    0.0539    0.7100    0.2574
Pt    0.0298    0.6442    0.2574
Pt    0.1868    0.5531    0.5068
Pt    0.1645    0.5072    0.4378
Pt    0.0074    0.5524    0.4602
Pt    0.0310    0.7127    0.5073
Pt    0.0755    0.5072    0.4841
Pt    0.0079    0.5080    0.4153
Pt    0.1634    0.5075    0.4831
Pt    0.0295    0.5078    0.4853
Pt    0.0076    0.5991    0.4613
Pt    0.0076    0.5303    0.4847
Pt    0.1842    0.5072    0.4148
Pt    0.2564    0.6422    0.4842
Pt    0.0074    0.5756    0.4387
Pt    0.0548    0.5548    0.4137
Pt    0.0534    0.5520    0.4617
Pt    0.2551    0.6637    0.4617
Pt    0.0539    0.5985    0.4631
Pt    0.2564    0.7335    0.4846
Pt    0.0537    0.6409    0.4605
Pt    0.0540    0.6883    0.5066
Pt    0.0529    0.6888    0.4158
Pt    0.0523    0.6887    0.4624
Pt    0.2092    0.5081    0.4846
Pt    0.0544    0.7333    0.4170
Pt    0.0528    0.7347    0.4615
Pt    0.1632    0.5303    0.4603
Pt    0.0985    0.5536    0.4606
Pt    0.0777    0.5079    0.4388
Pt    0.0993    0.6883    0.4175
Pt    0.0994    0.6860    0.4638
Pt    0.2553    0.7098    0.4157
Pt    0.0981    0.7347    0.4617
Pt    0.0767    0.7113    0.4152
Pt    0.1424    0.5550    0.4624
Pt    0.0996    0.7561    0.4380
Pt    0.1431    0.6872    0.4610
Pt    0.1427    0.7333    0.4609
Pt    0.2572    0.5975    0.4837
Pt    0.1867    0.5519    0.4149
Pt    0.1863    0.5529    0.4603
Pt    0.1832    0.6448    0.5061
Pt    0.1882    0.5959    0.4165
Pt    0.1874    0.5997    0.4596
Pt    0.1645    0.7551    0.4581
Pt    0.1865    0.6440    0.4609
Pt    0.1622    0.5807    0.4641
Pt    0.1894    0.6866    0.4153
Pt    0.1887    0.6871    0.4601
Pt    0.2088    0.5077    0.3926
Pt    0.1884    0.7341    0.4148
Pt    0.1883    0.7324    0.4601
Pt    0.0746    0.6647    0.4605
Pt    0.2328    0.5514    0.4165
Pt    0.2333    0.5515    0.4624
Pt    0.2567    0.6861    0.4380
Pt    0.2333    0.6004    0.4592
Pt    0.1418    0.5071    0.5066
Pt    0.2334    0.6413    0.4573
Pt    0.0764    0.6203    0.4622
Pt    0.2334    0.6863    0.4143
Pt    0.2345    0.6877    0.4610
Pt    0.1649    0.5782    0.5069
Pt    0.2329    0.7330    0.4157
Pt    0.2338    0.7337    0.4616
Pt    0.0772    0.5076    0.3936
Pt    0.1201    0.5791    0.4602
Pt    0.2120    0.7097    0.4616
Pt    0.2112    0.7103    0.4163
Pt    0.1869    0.7568    0.4838
Pt    0.2108    0.6641    0.4603
Pt    0.0545    0.5074    0.4150
Pt    0.2098    0.6217    0.4609
Pt    0.2096    0.6639    0.5059
Pt    0.2108    0.5765    0.4596
Pt    0.2126    0.5748    0.4164
Pt    0.1664    0.5760    0.4169
Pt    0.2100    0.5285    0.4613
Pt    0.0541    0.5300    0.3935
Pt    0.0533    0.5276    0.4396
Pt    0.0520    0.5302    0.4852
Pt    0.0520    0.5777    0.3922
Pt    0.0530    0.5745    0.4396
Pt    0.0531    0.5758    0.4850
Pt    0.0517    0.6202    0.4381
Pt    0.0532    0.6212    0.4850
Pt    0.0524    0.6656    0.4398
Pt    0.0534    0.6646    0.4841
Pt    0.0530    0.7103    0.3936
Pt    0.0538    0.7105    0.4398
Pt    0.0541    0.7109    0.4861
Pt    0.0985    0.5310    0.4380
Pt    0.0985    0.5302    0.4832
Pt    0.0975    0.5772    0.4381
Pt    0.0979    0.5760    0.4833
Pt    0.0963    0.6636    0.4396
Pt    0.0984    0.7115    0.4379
Pt    0.0986    0.7109    0.4867
Pt    0.1418    0.5301    0.4855
Pt    0.1431    0.5753    0.4385
Pt    0.1442    0.7102    0.4380
Pt    0.1413    0.7079    0.4837
Pt    0.1864    0.5299    0.3927
Pt    0.1862    0.5299    0.4380
Pt    0.1862    0.5309    0.4825
Pt    0.1892    0.5738    0.3946
Pt    0.1864    0.5754    0.4388
Pt    0.1872    0.5765    0.4836
Pt    0.1888    0.6200    0.4368
Pt    0.1849    0.6216    0.4811
Pt    0.1871    0.6656    0.4390
Pt    0.1860    0.6659    0.4833
Pt    0.1873    0.7097    0.3954
Pt    0.1889    0.7089    0.4374
Pt    0.1873    0.7117    0.4838
Pt    0.2342    0.5292    0.3927
Pt    0.2315    0.5288    0.4393
Pt    0.2339    0.5282    0.4843
Pt    0.2339    0.5763    0.3931
Pt    0.2343    0.5753    0.4394
Pt    0.2334    0.5761    0.4845
Pt    0.2338    0.6223    0.4842
Pt    0.2350    0.6645    0.4376
Pt    0.2337    0.6648    0.4859
Pt    0.2334    0.7104    0.3928
Pt    0.2340    0.7106    0.4390
Pt    0.2337    0.7119    0.4841
Pt    0.0308    0.5534    0.3941
Pt    0.0318    0.5530    0.4389
Pt    0.0297    0.5538    0.4838
Pt    0.0310    0.5987    0.4383
Pt    0.0307    0.5990    0.4857
Pt    0.0298    0.6436    0.4385
Pt    0.0288    0.6437    0.4863
Pt    0.0296    0.6866    0.4404
Pt    0.0300    0.6887    0.4843
Pt    0.0296    0.7328    0.3941
Pt    0.0301    0.7344    0.4396
Pt    0.0301    0.7340    0.4847
Pt    0.0798    0.5567    0.3947
Pt    0.0756    0.5545    0.4386
Pt    0.0749    0.5529    0.4850
Pt    0.0747    0.5984    0.4414
Pt    0.0770    0.5994    0.4862
Pt    0.0757    0.6405    0.4386
Pt    0.0786    0.6437    0.4822
Pt    0.0763    0.6869    0.3935
Pt    0.0761    0.6884    0.4394
Pt    0.0756    0.6872    0.4833
Pt    0.0755    0.7345    0.4393
Pt    0.0763    0.7347    0.4853
Pt    0.1217    0.5551    0.4374
Pt    0.1211    0.5543    0.4839
Pt    0.1203    0.6858    0.4411
Pt    0.1227    0.7327    0.4366
Pt    0.1207    0.7322    0.4850
Pt    0.1616    0.5506    0.4373
Pt    0.1639    0.5539    0.4835
Pt    0.1633    0.6000    0.4367
Pt    0.1650    0.6879    0.4364
Pt    0.1650    0.6879    0.4842
Pt    0.1659    0.7318    0.4374
Pt    0.1645    0.7341    0.4827
Pt    0.2114    0.5534    0.3931
Pt    0.2095    0.5524    0.4382
Pt    0.2092    0.5539    0.4822
Pt    0.2124    0.5991    0.4365
Pt    0.2102    0.5990    0.4821
Pt    0.2093    0.6441    0.4369
Pt    0.2099    0.6433    0.4841
Pt    0.2105    0.6874    0.3937
Pt    0.2123    0.6874    0.4375
Pt    0.2105    0.6882    0.4836
Pt    0.2094    0.7331    0.3921
Pt    0.2112    0.7332    0.4377
Pt    0.2099    0.7332    0.4841
Pt    0.2321    0.5529    0.5070
Pt    0.0986    0.5072    0.4606
Pt    0.0765    0.5765    0.4634
Pt    0.2550    0.5750    0.5059
Pt    0.1210    0.5312    0.4599
Pt    0.0765    0.5320    0.4152
Pt    0.0774    0.7116    0.4628
Pt    0.1207    0.7110    0.4608
Pt    0.0723    0.5801    0.4162
Pt    0.2098    0.5768    0.5056
Pt    0.1440    0.7564    0.4361
Pt    0.1219    0.7565    0.4601
Pt    0.0313    0.5303    0.4172
Pt    0.0299    0.5291    0.4612
Pt    0.2097    0.5297    0.4154
Pt    0.0303    0.5760    0.4173
Pt    0.0302    0.5762    0.4629
Pt    0.0752    0.5308    0.4618
Pt    0.0289    0.6211    0.4621
Pt    0.1665    0.7092    0.4609
Pt    0.0304    0.6645    0.4621
Pt    0.2564    0.7562    0.4610
Pt    0.0300    0.7102    0.4180
Pt    0.0292    0.7116    0.4608
Pt    0.0755    0.6659    0.4178
Pt    0.1869    0.7570    0.4367
Pt    0.2567    0.6200    0.5068
Pt    0.0299    0.7559    0.4618
Pt    0.2343    0.7567    0.4389
Pt    0.2333    0.7560    0.4843
Pt    0.0305    0.7556    0.4150
Pt    0.2568    0.5529    0.4843
Pt    0.1862    0.5999    0.5050
Pt    0.0762    0.7569    0.4617
Pt    0.2110    0.7566    0.4158
Pt    0.2557    0.5755    0.4616
Pt    0.2556    0.6892    0.4869
Pt    0.2104    0.7569    0.5066
Pt    0.2080    0.6228    0.5067
Pt    0.0779    0.7565    0.4162
Pt    0.2565    0.5517    0.4383
Pt    0.0559    0.7542    0.3942
Pt    0.2350    0.7557    0.3952
Pt    0.2569    0.5538    0.3937
Pt    0.2571    0.5753    0.4157
Pt    0.2568    0.7106    0.4617
Pt    0.2565    0.7334    0.4381
Pt    0.2572    0.6202    0.4619
Pt    0.2107    0.7553    0.4619
Pt    0.0532    0.7561    0.4380
Pt    0.2573    0.5072    0.4849
Pt    0.2559    0.6652    0.5071
Pt    0.1875    0.6873    0.5069
Pt    0.1650    0.7104    0.5064
Pt    0.1643    0.5305    0.5063
Pt    0.0539    0.7351    0.5073
Pt    0.0984    0.5531    0.5072
Pt    0.0313    0.5321    0.5081
Pt    0.0077    0.7113    0.5766
Pt    0.0080    0.6660    0.5789
Pt    0.2338    0.5077    0.5981
Pt    0.0091    0.7091    0.6223
Pt    0.0519    0.5551    0.5084
Pt    0.0303    0.5085    0.5768
Pt    0.2085    0.5096    0.5762
Pt    0.0545    0.5551    0.5546
Pt    0.0550    0.5533    0.6007
Pt    0.0532    0.5998    0.5545
Pt    0.0536    0.6421    0.5548
Pt    0.0533    0.6883    0.5529
Pt    0.0514    0.6850    0.6010
Pt    0.0519    0.7342    0.5530
Pt    0.0538    0.7339    0.6014
Pt    0.0992    0.5539    0.5552
Pt    0.0999    0.6875    0.5545
Pt    0.0980    0.6900    0.6011
Pt    0.0974    0.7339    0.5531
Pt    0.1431    0.5554    0.5538
Pt    0.1429    0.6876    0.5546
Pt    0.1420    0.7345    0.5532
Pt    0.1857    0.5550    0.5524
Pt    0.1873    0.5549    0.5993
Pt    0.1851    0.6018    0.5498
Pt    0.1861    0.5979    0.5987
Pt    0.1857    0.6437    0.5539
Pt    0.1866    0.6878    0.5535
Pt    0.1872    0.6859    0.6001
Pt    0.1889    0.7349    0.5540
Pt    0.1865    0.7324    0.5997
Pt    0.2345    0.5515    0.5528
Pt    0.2325    0.5531    0.5983
Pt    0.2341    0.5978    0.5530
Pt    0.2331    0.6427    0.5565
Pt    0.2335    0.6864    0.5554
Pt    0.2333    0.6871    0.5982
Pt    0.2358    0.7335    0.5536
Pt    0.2326    0.7339    0.6004
Pt    0.2098    0.7106    0.6000
Pt    0.2101    0.7117    0.5541
Pt    0.2100    0.6663    0.5543
Pt    0.2100    0.6207    0.5546
Pt    0.2108    0.5764    0.5983
Pt    0.2098    0.5770    0.5527
Pt    0.2092    0.5306    0.6000
Pt    0.2094    0.5300    0.5520
Pt    0.1654    0.7109    0.5531
Pt    0.1634    0.5763    0.5978
Pt    0.1635    0.5780    0.5509
Pt    0.1650    0.5313    0.5547
Pt    0.0542    0.5324    0.5325
Pt    0.0536    0.5298    0.5779
Pt    0.0538    0.5298    0.6225
Pt    0.0536    0.5768    0.5321
Pt    0.0530    0.5778    0.5776
Pt    0.0525    0.5779    0.6195
Pt    0.0538    0.6216    0.5326
Pt    0.0533    0.6206    0.5779
Pt    0.0525    0.6658    0.5302
Pt    0.0544    0.6656    0.5759
Pt    0.0535    0.7114    0.5308
Pt    0.0537    0.7094    0.5772
Pt    0.0549    0.7087    0.6220
Pt    0.0990    0.5299    0.5319
Pt    0.1001    0.5319    0.5797
Pt    0.0978    0.5772    0.5308
Pt    0.0990    0.5782    0.5771
Pt    0.0995    0.6680    0.5772
Pt    0.0991    0.7102    0.5329
Pt    0.0984    0.7103    0.5775
Pt    0.1431    0.5316    0.5326
Pt    0.1429    0.5784    0.5748
Pt    0.1430    0.7096    0.5305
Pt    0.1456    0.7111    0.5782
Pt    0.1859    0.5312    0.5307
Pt    0.1862    0.5321    0.5773
Pt    0.1841    0.5310    0.6199
Pt    0.1872    0.5778    0.5281
Pt    0.1847    0.5756    0.5754
Pt    0.1860    0.5761    0.6208
Pt    0.1872    0.6255    0.5298
Pt    0.1883    0.6206    0.5771
Pt    0.1870    0.6655    0.5314
Pt    0.1859    0.6650    0.5766
Pt    0.1874    0.7106    0.5299
Pt    0.1872    0.7103    0.5761
Pt    0.1859    0.7083    0.6206
Pt    0.2319    0.5285    0.5291
Pt    0.2325    0.5298    0.5750
Pt    0.2336    0.5300    0.6217
Pt    0.2328    0.5770    0.5292
Pt    0.2330    0.5741    0.5743
Pt    0.2348    0.5764    0.6208
Pt    0.2330    0.6216    0.5320
Pt    0.2340    0.6656    0.5308
Pt    0.2328    0.6648    0.5791
Pt    0.2335    0.7107    0.5300
Pt    0.2327    0.7102    0.5759
Pt    0.2338    0.7101    0.6208
Pt    0.0295    0.5545    0.5317
Pt    0.0323    0.5543    0.5770
Pt    0.0301    0.5527    0.6205
Pt    0.0308    0.6005    0.5313
Pt    0.0282    0.6001    0.5779
Pt    0.0309    0.6433    0.5316
Pt    0.0307    0.6434    0.5794
Pt    0.0301    0.6894    0.5305
Pt    0.0300    0.6875    0.5770
Pt    0.0316    0.7351    0.5303
Pt    0.0320    0.7334    0.5767
Pt    0.0300    0.7348    0.6216
Pt    0.0768    0.5536    0.5310
Pt    0.0762    0.5535    0.5770
Pt    0.0759    0.5554    0.6228
Pt    0.0787    0.6005    0.5309
Pt    0.0767    0.6008    0.5765
Pt    0.0760    0.6443    0.5314
Pt    0.0773    0.6448    0.5761
Pt    0.0764    0.6881    0.5304
Pt    0.0754    0.6887    0.5793
Pt    0.0776    0.6876    0.6226
Pt    0.0762    0.7348    0.5306
Pt    0.0763    0.7332    0.5762
Pt    0.1199    0.5559    0.5306
Pt    0.1220    0.5556    0.5777
Pt    0.1214    0.6906    0.5785
Pt    0.1208    0.7341    0.5293
Pt    0.1210    0.7324    0.5780
Pt    0.1655    0.5545    0.5308
Pt    0.1628    0.5530    0.5773
Pt    0.1660    0.5993    0.5746
Pt    0.1635    0.6865    0.5301
Pt    0.1654    0.6878    0.5758
Pt    0.1650    0.7329    0.5306
Pt    0.1653    0.7336    0.5778
Pt    0.2099    0.5542    0.5299
Pt    0.2095    0.5534    0.5751
Pt    0.2101    0.5536    0.6212
Pt    0.2075    0.5998    0.5281
Pt    0.2096    0.5980    0.5755
Pt    0.2112    0.6437    0.5323
Pt    0.2094    0.6440    0.5775
Pt    0.2105    0.6881    0.5321
Pt    0.2093    0.6874    0.5769
Pt    0.2105    0.6868    0.6205
Pt    0.2115    0.7336    0.5299
Pt    0.2093    0.7343    0.5776
Pt    0.2078    0.7355    0.6239
Pt    0.2324    0.6421    0.5084
Pt    0.1871    0.5079    0.5533
Pt    0.1208    0.7105    0.5085
Pt    0.0078    0.5299    0.5309
Pt    0.0080    0.7347    0.5535
Pt    0.2326    0.6875    0.5079
Pt    0.2559    0.6870    0.6210
Pt    0.0760    0.5078    0.5328
Pt    0.0075    0.6877    0.5539
Pt    0.2568    0.5745    0.5513
Pt    0.0542    0.6436    0.5082
Pt    0.0767    0.5075    0.5785
Pt    0.0305    0.5311    0.5549
Pt    0.0287    0.5301    0.6000
Pt    0.0300    0.5774    0.5536
Pt    0.0288    0.5756    0.5984
Pt    0.0292    0.6217    0.5557
Pt    0.0304    0.6650    0.5549
Pt    0.0316    0.7117    0.5544
Pt    0.0307    0.7110    0.5998
Pt    0.0767    0.5305    0.5560
Pt    0.0755    0.5298    0.6003
Pt    0.0766    0.5785    0.5555
Pt    0.0773    0.5768    0.5989
Pt    0.0794    0.6216    0.5542
Pt    0.0766    0.6670    0.5545
Pt    0.0771    0.6650    0.6005
Pt    0.0760    0.7100    0.5541
Pt    0.0779    0.7138    0.6008
Pt    0.1221    0.5326    0.5561
Pt    0.1200    0.5769    0.5534
Pt    0.1210    0.7110    0.5545
Pt    0.2552    0.5303    0.5975
Pt    0.1202    0.5313    0.5093
Pt    0.2555    0.6636    0.5563
Pt    0.2572    0.5080    0.6211
Pt    0.0301    0.5774    0.5077
Pt    0.0311    0.5080    0.5311
Pt    0.2562    0.7344    0.6225
Pt    0.2552    0.5973    0.5743
Pt    0.2560    0.5286    0.5078
Pt    0.2562    0.7111    0.5088
Pt    0.2559    0.6873    0.5326
Pt    0.0992    0.5086    0.5554
Pt    0.2091    0.7563    0.6014
Pt    0.1426    0.5084    0.5545
Pt    0.2554    0.5527    0.5301
Pt    0.0074    0.6900    0.5085
Pt    0.2331    0.7343    0.5079
Pt    0.2569    0.5540    0.6204
Pt    0.2565    0.6868    0.5772
Pt    0.2561    0.5984    0.5306
Pt    0.0977    0.7349    0.5084
Pt    0.2114    0.7569    0.5547
Pt    0.1437    0.7569    0.5772
Pt    0.0756    0.7122    0.5082
Pt    0.2555    0.5769    0.5973
Pt    0.2106    0.5073    0.6215
Pt    0.0536    0.6003    0.5081
Pt    0.2337    0.7565    0.5774
Pt    0.2556    0.7114    0.5983
Pt    0.2561    0.6419    0.5303
Pt    0.0786    0.6654    0.5079
Pt    0.1432    0.7335    0.5081
Pt    0.0292    0.6216    0.5083
Pt    0.2567    0.7094    0.5539
Pt    0.0766    0.5303    0.5082
Pt    0.2572    0.7566    0.5078
Pt    0.1658    0.7565    0.5533
Pt    0.2573    0.5529    0.5756
Pt    0.1869    0.7557    0.5781
Pt    0.1205    0.7570    0.5533
Pt    0.0996    0.7566    0.5792
Pt    0.1421    0.7563    0.5292
Pt    0.0303    0.6657    0.5076
Pt    0.0988    0.6881    0.5078
Pt    0.1425    0.5557    0.5078
Pt    0.0749    0.5774    0.5083
Pt    0.1878    0.7345    0.5078
Pt    0.0540    0.5076    0.5103
Pt    0.2311    0.5996    0.5076
Pt    0.2090    0.5313    0.5076
Pt    0.2099    0.7102    0.5076
Pt    0.0763    0.6218    0.5074
Pt    0.2351    0.6205    0.7569
Pt    0.0074    0.5305    0.6654
Pt    0.0760    0.5077    0.7098
Pt    0.2562    0.5074    0.6652
Pt    0.0303    0.5085    0.7116
Pt    0.0081    0.6428    0.7357
Pt    0.1890    0.5072    0.6873
Pt    0.0524    0.5082    0.6435
Pt    0.2340    0.5072    0.6435
Pt    0.2571    0.7556    0.6895
Pt    0.2100    0.5076    0.6651
Pt    0.2363    0.5769    0.7569
Pt    0.0514    0.5555    0.6437
Pt    0.0531    0.5537    0.6881
Pt    0.0552    0.5523    0.7348
Pt    0.0534    0.5997    0.6893
Pt    0.0543    0.5985    0.7357
Pt    0.0544    0.6429    0.6889
Pt    0.0536    0.6440    0.7353
Pt    0.0544    0.6853    0.6431
Pt    0.0534    0.6867    0.6866
Pt    0.0547    0.6890    0.7344
Pt    0.0556    0.7330    0.6428
Pt    0.0517    0.7345    0.6898
Pt    0.0526    0.7338    0.7347
Pt    0.1000    0.5521    0.6872
Pt    0.0996    0.5527    0.7345
Pt    0.0986    0.5978    0.6890
Pt    0.0979    0.6888    0.6885
Pt    0.1000    0.6860    0.7344
Pt    0.0983    0.7331    0.6870
Pt    0.0989    0.7328    0.7362
Pt    0.1437    0.5514    0.6895
Pt    0.1425    0.5524    0.7344
Pt    0.1442    0.6892    0.6878
Pt    0.1444    0.6861    0.7352
Pt    0.1419    0.7337    0.6882
Pt    0.1432    0.7328    0.7348
Pt    0.1856    0.5539    0.6434
Pt    0.1861    0.5534    0.6880
Pt    0.1890    0.5537    0.7348
Pt    0.1866    0.5986    0.6907
Pt    0.1892    0.5978    0.7350
Pt    0.1897    0.6425    0.6890
Pt    0.1889    0.6849    0.6430
Pt    0.1890    0.6858    0.6886
Pt    0.1899    0.6881    0.7341
Pt    0.1890    0.7340    0.6877
Pt    0.1892    0.7345    0.7329
Pt    0.2325    0.5546    0.6420
Pt    0.2329    0.5544    0.6874
Pt    0.2367    0.5555    0.7346
Pt    0.2334    0.5995    0.6871
Pt    0.2334    0.5989    0.7332
Pt    0.2343    0.6434    0.7331
Pt    0.2328    0.6855    0.6434
Pt    0.2343    0.6869    0.6884
Pt    0.2342    0.6890    0.7332
Pt    0.2327    0.7338    0.6437
Pt    0.2348    0.7336    0.6877
Pt    0.2346    0.7342    0.7324
Pt    0.2122    0.7124    0.7347
Pt    0.2112    0.7109    0.6881
Pt    0.2103    0.7103    0.6432
Pt    0.2116    0.6666    0.7347
Pt    0.2138    0.6634    0.6865
Pt    0.2094    0.6216    0.7352
Pt    0.2106    0.6203    0.6883
Pt    0.2130    0.5756    0.7345
Pt    0.0533    0.5317    0.6648
Pt    0.0542    0.5309    0.7102
Pt    0.0553    0.5759    0.6655
Pt    0.0535    0.5776    0.7112
Pt    0.0530    0.6219    0.7131
Pt    0.0543    0.6651    0.7124
Pt    0.0538    0.7112    0.6659
Pt    0.0545    0.7104    0.7100
Pt    0.0994    0.5300    0.7099
Pt    0.0996    0.5765    0.6657
Pt    0.0989    0.5768    0.7124
Pt    0.0988    0.7091    0.7115
Pt    0.1410    0.5288    0.7102
Pt    0.1425    0.5761    0.7116
Pt    0.1439    0.7111    0.7109
Pt    0.1857    0.5301    0.6648
Pt    0.1886    0.5298    0.7112
Pt    0.1895    0.5780    0.6666
Pt    0.1881    0.5764    0.7117
Pt    0.1879    0.6219    0.7120
Pt    0.1894    0.6628    0.6661
Pt    0.1889    0.6650    0.7138
Pt    0.1875    0.7123    0.6627
Pt    0.1886    0.7104    0.7102
Pt    0.2325    0.5331    0.6640
Pt    0.2337    0.5310    0.7126
Pt    0.2338    0.5778    0.6648
Pt    0.2342    0.5767    0.7099
Pt    0.2340    0.6214    0.7085
Pt    0.2358    0.6639    0.7102
Pt    0.2339    0.7098    0.6657
Pt    0.2352    0.7105    0.7110
Pt    0.0287    0.5539    0.6669
Pt    0.0305    0.5528    0.7114
Pt    0.0300    0.5987    0.7129
Pt    0.0306    0.6441    0.7112
Pt    0.0297    0.6862    0.6653
Pt    0.0296    0.6885    0.7101
Pt    0.0302    0.7344    0.6662
Pt    0.0298    0.7328    0.7118
Pt    0.0780    0.5543    0.6636
Pt    0.0768    0.5517    0.7104
Pt    0.0765    0.6000    0.6677
Pt    0.0767    0.5998    0.7126
Pt    0.0764    0.6425    0.7143
Pt    0.0766    0.6853    0.6649
Pt    0.0778    0.6864    0.7112
Pt    0.0762    0.7340    0.6657
Pt    0.0762    0.7340    0.7115
Pt    0.1201    0.5534    0.7113
Pt    0.1228    0.6870    0.7098
Pt    0.1206    0.7340    0.7128
Pt    0.1640    0.5535    0.7113
Pt    0.1680    0.6873    0.6667
Pt    0.1670    0.6876    0.7131
Pt    0.1665    0.7346    0.7111
Pt    0.2097    0.5544    0.6649
Pt    0.2102    0.5536    0.7116
Pt    0.2107    0.5990    0.7114
Pt    0.2122    0.6422    0.7110
Pt    0.2102    0.6874    0.6665
Pt    0.2107    0.6883    0.7103
Pt    0.2120    0.7344    0.6667
Pt    0.2124    0.7342    0.7110
Pt    0.0081    0.5996    0.7349
Pt    0.0076    0.5774    0.6648
Pt    0.2572    0.6879    0.7107
Pt    0.2114    0.5989    0.7572
Pt    0.0983    0.7566    0.7112
Pt    0.0084    0.6211    0.7110
Pt    0.0089    0.6881    0.7355
Pt    0.2132    0.5071    0.7563
Pt    0.0303    0.5308    0.6444
Pt    0.0302    0.5301    0.6887
Pt    0.0313    0.5289    0.7350
Pt    0.0309    0.5765    0.6889
Pt    0.0322    0.5751    0.7357
Pt    0.0303    0.6210    0.6883
Pt    0.0309    0.6216    0.7360
Pt    0.0320    0.6650    0.6875
Pt    0.0304    0.6651    0.7341
Pt    0.0320    0.7100    0.6443
Pt    0.0291    0.7110    0.6890
Pt    0.0298    0.7093    0.7349
Pt    0.0763    0.5315    0.6448
Pt    0.0771    0.5311    0.6876
Pt    0.0764    0.5288    0.7340
Pt    0.0754    0.5791    0.6427
Pt    0.0770    0.5738    0.6893
Pt    0.0769    0.5754    0.7348
Pt    0.0765    0.6219    0.6897
Pt    0.0780    0.6646    0.6898
Pt    0.0783    0.6632    0.7369
Pt    0.0780    0.7097    0.6455
Pt    0.0766    0.7101    0.6868
Pt    0.0781    0.7110    0.7338
Pt    0.1213    0.5293    0.7358
Pt    0.1210    0.5758    0.6886
Pt    0.1192    0.5772    0.7347
Pt    0.1207    0.7120    0.6874
Pt    0.1215    0.7086    0.7348
Pt    0.1646    0.5289    0.6866
Pt    0.1675    0.5297    0.7316
Pt    0.1645    0.5775    0.6900
Pt    0.1647    0.5745    0.7360
Pt    0.1660    0.6647    0.6885
Pt    0.1661    0.7123    0.6874
Pt    0.1665    0.7103    0.7350
Pt    0.2084    0.5311    0.6426
Pt    0.2103    0.5314    0.6878
Pt    0.2112    0.5298    0.7343
Pt    0.2098    0.5765    0.6416
Pt    0.2095    0.5766    0.6889
Pt    0.2572    0.6004    0.7094
Pt    0.2556    0.7096    0.6435
Pt    0.0089    0.5748    0.7119
Pt    0.1435    0.7565    0.7123
Pt    0.0309    0.7566    0.6879
Pt    0.1868    0.7570    0.6649
Pt    0.0287    0.7559    0.7337
Pt    0.2570    0.7342    0.6655
Pt    0.1660    0.5071    0.7094
Pt    0.0075    0.5527    0.7346
Pt    0.2559    0.5302    0.6882
Pt    0.2106    0.5076    0.7103
Pt    0.2571    0.6419    0.7072
Pt    0.2572    0.6650    0.7329
Pt    0.2336    0.5083    0.6869
Pt    0.0764    0.7570    0.7354
Pt    0.1193    0.7545    0.6878
Pt    0.2566    0.5310    0.6429
Pt    0.2559    0.6861    0.6643
Pt    0.0546    0.7554    0.6650
Pt    0.2563    0.5546    0.7104
Pt    0.0306    0.7567    0.6434
Pt    0.2571    0.6651    0.6867
Pt    0.0993    0.7101    0.7573
Pt    0.1662    0.5072    0.7564
Pt    0.2362    0.5306    0.7571
Pt    0.0295    0.7333    0.7558
Pt    0.2134    0.6437    0.7572
Pt    0.1665    0.5522    0.7564
Pt    0.1879    0.7562    0.7556
Pt    0.1447    0.5294    0.7552
Pt    0.1433    0.5757    0.7568
Pt    0.0537    0.5750    0.7568
Pt    0.0075    0.5300    0.7137
Pt    0.0074    0.5985    0.6887
Pt    0.0530    0.5073    0.6883
Pt    0.2342    0.5072    0.7335
Pt    0.0306    0.5072    0.6668
Pt    0.2339    0.7104    0.7572
Pt    0.0771    0.5291    0.8284
Pt    0.0752    0.5287    0.7815
Pt    0.0310    0.7096    0.8733
Pt    0.0305    0.5507    0.7582
Pt    0.0316    0.7116    0.8266
Pt    0.2349    0.7563    0.8034
Pt    0.0082    0.5544    0.8258
Pt    0.0301    0.7118    0.7810
Pt    0.1237    0.5071    0.8056
Pt    0.0083    0.7335    0.8274
Pt    0.0078    0.5547    0.8716
Pt    0.0095    0.6667    0.7589
Pt    0.0537    0.5524    0.7811
Pt    0.0549    0.5533    0.8274
Pt    0.0531    0.5554    0.8708
Pt    0.0540    0.5977    0.7800
Pt    0.0564    0.5996    0.8266
Pt    0.0542    0.6436    0.7807
Pt    0.0561    0.6433    0.8286
Pt    0.0548    0.6878    0.7825
Pt    0.0556    0.6881    0.8263
Pt    0.0554    0.6882    0.8730
Pt    0.0537    0.7352    0.7807
Pt    0.0551    0.7348    0.8272
Pt    0.0533    0.7326    0.8711
Pt    0.1002    0.5527    0.7819
Pt    0.1004    0.5520    0.8268
Pt    0.0999    0.5988    0.8251
Pt    0.1001    0.6871    0.7804
Pt    0.1007    0.6877    0.8253
Pt    0.0978    0.7338    0.7803
Pt    0.0994    0.7349    0.8276
Pt    0.1449    0.5521    0.7826
Pt    0.1455    0.5534    0.8260
Pt    0.1439    0.6875    0.7813
Pt    0.1417    0.6897    0.8268
Pt    0.1435    0.7337    0.7816
Pt    0.1453    0.7343    0.8267
Pt    0.1894    0.5518    0.7798
Pt    0.1887    0.5527    0.8268
Pt    0.1909    0.5545    0.8707
Pt    0.1871    0.6006    0.7790
Pt    0.1895    0.5986    0.8225
Pt    0.1883    0.6436    0.8263
Pt    0.1894    0.6862    0.7807
Pt    0.1906    0.6884    0.8265
Pt    0.1903    0.6890    0.8712
Pt    0.1875    0.7365    0.7817
Pt    0.1895    0.7351    0.8269
Pt    0.2372    0.5536    0.7806
Pt    0.2350    0.5524    0.8267
Pt    0.2365    0.5553    0.8719
Pt    0.2357    0.5997    0.7802
Pt    0.2371    0.5993    0.8275
Pt    0.2360    0.6432    0.7812
Pt    0.2355    0.6896    0.7811
Pt    0.2349    0.6886    0.8273
Pt    0.2358    0.6870    0.8720
Pt    0.2349    0.7343    0.7785
Pt    0.2360    0.7340    0.8265
Pt    0.2333    0.7352    0.8714
Pt    0.2133    0.7102    0.8723
Pt    0.2126    0.7127    0.8271
Pt    0.2095    0.7134    0.7804
Pt    0.2122    0.6655    0.8275
Pt    0.2120    0.6651    0.7818
Pt    0.2114    0.6197    0.8257
Pt    0.2116    0.6213    0.7785
Pt    0.2118    0.5786    0.8715
Pt    0.2136    0.5778    0.8258
Pt    0.2127    0.5768    0.7804
Pt    0.2132    0.5309    0.8711
Pt    0.2122    0.5310    0.8260
Pt    0.2135    0.5294    0.7818
Pt    0.0089    0.7568    0.8487
Pt    0.0537    0.5294    0.8046
Pt    0.0528    0.5324    0.8509
Pt    0.0078    0.6442    0.8277
Pt    0.0536    0.5767    0.8043
Pt    0.0545    0.5765    0.8476
Pt    0.0082    0.5288    0.7575
Pt    0.0555    0.6207    0.8031
Pt    0.0756    0.5075    0.8504
Pt    0.0535    0.6631    0.8054
Pt    0.0075    0.5742    0.7582
Pt    0.0548    0.7119    0.8040
Pt    0.0546    0.7107    0.8489
Pt    0.1884    0.7567    0.8038
Pt    0.1004    0.5292    0.8052
Pt    0.0090    0.7338    0.8721
Pt    0.1002    0.5772    0.8021
Pt    0.1018    0.5753    0.8495
Pt    0.0763    0.5075    0.8051
Pt    0.0989    0.7111    0.8036
Pt    0.0086    0.6447    0.7814
Pt    0.1444    0.5297    0.8061
Pt    0.1221    0.7331    0.7576
Pt    0.1442    0.5759    0.8022
Pt    0.0526    0.5075    0.8278
Pt    0.1436    0.7099    0.8039
Pt    0.0534    0.7568    0.8496
Pt    0.1896    0.5303    0.8031
Pt    0.1900    0.5315    0.8500
Pt    0.1222    0.6863    0.7580
Pt    0.1891    0.5755    0.8013
Pt    0.1926    0.5778    0.8476
Pt    0.1898    0.6209    0.8014
Pt    0.1441    0.7084    0.7581
Pt    0.1873    0.6628    0.8022
Pt    0.1907    0.6655    0.8482
Pt    0.0549    0.6210    0.7577
Pt    0.1888    0.7112    0.8037
Pt    0.1887    0.7122    0.8514
Pt    0.0074    0.5519    0.7801
Pt    0.2350    0.5291    0.8026
Pt    0.2361    0.5297    0.8476
Pt    0.0290    0.7559    0.7793
Pt    0.2357    0.5766    0.8030
Pt    0.2347    0.5774    0.8499
Pt    0.2356    0.6661    0.7580
Pt    0.2344    0.6205    0.8045
Pt    0.0296    0.6659    0.8272
Pt    0.2344    0.6657    0.8050
Pt    0.1899    0.5082    0.8699
Pt    0.2337    0.7117    0.8029
Pt    0.2361    0.7108    0.8507
Pt    0.0074    0.6212    0.8051
Pt    0.0325    0.5528    0.8041
Pt    0.0301    0.5544    0.8496
Pt    0.0090    0.7103    0.8495
Pt    0.0297    0.5989    0.8053
Pt    0.0312    0.6646    0.7838
Pt    0.0323    0.6417    0.8055
Pt    0.1667    0.7116    0.8287
Pt    0.0317    0.6890    0.8041
Pt    0.0331    0.6883    0.8496
Pt    0.1663    0.7104    0.7804
Pt    0.0320    0.7348    0.8038
Pt    0.0306    0.7330    0.8500
Pt    0.1655    0.6673    0.8281
Pt    0.0782    0.5526    0.8042
Pt    0.0805    0.5522    0.8507
Pt    0.1661    0.5773    0.8240
Pt    0.0790    0.5999    0.8022
Pt    0.0799    0.6007    0.8474
Pt    0.0776    0.6436    0.8043
Pt    0.1657    0.5751    0.7787
Pt    0.0777    0.6869    0.8045
Pt    0.0772    0.6868    0.8490
Pt    0.1672    0.5302    0.8276
Pt    0.0765    0.7347    0.8036
Pt    0.0784    0.7356    0.8504
Pt    0.1665    0.5300    0.7804
Pt    0.1213    0.5550    0.8044
Pt    0.1204    0.7125    0.8298
Pt    0.1206    0.6884    0.8034
Pt    0.1220    0.7110    0.7811
Pt    0.1222    0.7334    0.8054
Pt    0.1220    0.5765    0.8260
Pt    0.1672    0.5521    0.8036
Pt    0.1218    0.5753    0.7796
Pt    0.1680    0.6890    0.8043
Pt    0.1675    0.6889    0.8483
Pt    0.1219    0.5291    0.7819
Pt    0.1658    0.7338    0.8034
Pt    0.0776    0.7118    0.8718
Pt    0.2111    0.5545    0.8049
Pt    0.2137    0.5542    0.8485
Pt    0.0787    0.7124    0.8277
Pt    0.2127    0.5980    0.8019
Pt    0.0768    0.7111    0.7798
Pt    0.2114    0.6420    0.8036
Pt    0.0777    0.6656    0.8262
Pt    0.2121    0.6883    0.8046
Pt    0.2123    0.6892    0.8492
Pt    0.0780    0.6655    0.7809
Pt    0.2126    0.7342    0.8030
Pt    0.2113    0.7345    0.8492
Pt    0.0795    0.6229    0.8258
Pt    0.0780    0.6880    0.7580
Pt    0.0767    0.7563    0.8278
Pt    0.0778    0.5769    0.8681
Pt    0.0304    0.6443    0.7595
Pt    0.0786    0.5762    0.8266
Pt    0.0304    0.5767    0.8274
Pt    0.0758    0.5750    0.7818
Pt    0.0992    0.5290    0.7580
Pt    0.0316    0.6206    0.8278
Pt    0.0766    0.5312    0.8724
Pt    0.0312    0.5756    0.7803
Pt    0.0332    0.6205    0.7812
Pt    0.0310    0.5298    0.7817
Pt    0.0307    0.5305    0.8281
Pt    0.0299    0.5306    0.8724
Pt    0.1217    0.5519    0.7587
Pt    0.2570    0.5764    0.8270
Pt    0.0538    0.6661    0.7592
Pt    0.0980    0.5740    0.7588
Pt    0.0080    0.5982    0.7819
Pt    0.0307    0.5073    0.8490
Pt    0.0752    0.7345    0.7575
Pt    0.1209    0.7567    0.7796
Pt    0.1005    0.5072    0.7820
Pt    0.0301    0.5983    0.7577
Pt    0.0085    0.6206    0.7591
Pt    0.0992    0.7569    0.8056
Pt    0.0759    0.5979    0.7591
Pt    0.0320    0.6877    0.7582
Pt    0.1895    0.5079    0.8283
Pt    0.2136    0.6874    0.7584
Pt    0.0539    0.7099    0.7592
Pt    0.0763    0.5513    0.7586
Pt    0.1898    0.7094    0.7576
Pt    0.1897    0.5745    0.7579
Pt    0.0523    0.5285    0.7580
Pt    0.1894    0.6638    0.7586
Pt    0.2137    0.5531    0.7576
Pt    0.1443    0.7562    0.7575
Pt    0.1664    0.7330    0.7587
Pt    0.1665    0.6842    0.7591
Pt    0.1895    0.5296    0.7588
Pt    0.2120    0.7352    0.7580
Pt    0.2571    0.6886    0.8040
Pt    0.0074    0.7102    0.7578
Pt    0.0084    0.7341    0.0073
Pt    0.0075    0.6659    0.9366
Pt    0.2121    0.5071    0.9380
Pt    0.0091    0.6216    0.9829
Pt    0.1660    0.5075    0.9845
Pt    0.2357    0.5074    0.9615
Pt    0.0084    0.7121    0.9829
Pt    0.2113    0.5756    0.0073
Pt    0.0552    0.5533    0.9143
Pt    0.0548    0.5535    0.9613
Pt    0.0541    0.5994    0.9612
Pt    0.0522    0.6428    0.9612
Pt    0.0533    0.6878    0.9138
Pt    0.0532    0.6882    0.9618
Pt    0.0551    0.7350    0.9149
Pt    0.0527    0.7329    0.9605
Pt    0.1015    0.5528    0.9591
Pt    0.0999    0.6888    0.9157
Pt    0.0992    0.6885    0.9625
Pt    0.0986    0.7341    0.9610
Pt    0.1452    0.5544    0.9587
Pt    0.1435    0.6896    0.9602
Pt    0.1427    0.7335    0.9598
Pt    0.1897    0.5523    0.9131
Pt    0.1875    0.5548    0.9586
Pt    0.1900    0.6011    0.9128
Pt    0.1870    0.5993    0.9615
Pt    0.1866    0.6452    0.9623
Pt    0.1871    0.6886    0.9142
Pt    0.1886    0.6887    0.9618
Pt    0.1874    0.7360    0.9142
Pt    0.1885    0.7336    0.9618
Pt    0.2344    0.5543    0.9151
Pt    0.2357    0.5541    0.9619
Pt    0.2343    0.5984    0.9626
Pt    0.2345    0.6427    0.9589
Pt    0.2340    0.6876    0.9162
Pt    0.2356    0.6871    0.9605
Pt    0.2348    0.7337    0.9148
Pt    0.2327    0.7340    0.9614
Pt    0.2111    0.7098    0.9592
Pt    0.2110    0.7114    0.9154
Pt    0.2127    0.6661    0.9606
Pt    0.2102    0.6217    0.9609
Pt    0.2106    0.5771    0.9603
Pt    0.2126    0.5764    0.9168
Pt    0.2123    0.5304    0.9600
Pt    0.2118    0.5298    0.9155
Pt    0.1662    0.7126    0.9620
Pt    0.1660    0.5775    0.9607
Pt    0.1675    0.5783    0.9133
Pt    0.1654    0.5312    0.9593
Pt    0.0542    0.5319    0.8926
Pt    0.0545    0.5307    0.9361
Pt    0.0561    0.5307    0.9839
Pt    0.0561    0.5775    0.8919
Pt    0.0534    0.5766    0.9384
Pt    0.0546    0.5765    0.9851
Pt    0.0558    0.6208    0.9388
Pt    0.0541    0.6215    0.9858
Pt    0.0523    0.6662    0.9377
Pt    0.0538    0.6650    0.9844
Pt    0.0545    0.7105    0.8931
Pt    0.0533    0.7099    0.9373
Pt    0.0555    0.7110    0.9844
Pt    0.1004    0.5300    0.9373
Pt    0.1016    0.5312    0.9823
Pt    0.1003    0.5762    0.9368
Pt    0.1008    0.5769    0.9831
Pt    0.0995    0.6653    0.9378
Pt    0.0999    0.7123    0.9374
Pt    0.0972    0.7108    0.9853
Pt    0.1439    0.5320    0.9843
Pt    0.1455    0.5768    0.9365
Pt    0.1413    0.7129    0.9357
Pt    0.1428    0.7107    0.9838
Pt    0.1891    0.5297    0.8926
Pt    0.1895    0.5302    0.9374
Pt    0.1879    0.5313    0.9830
Pt    0.1903    0.5765    0.8932
Pt    0.1878    0.5763    0.9351
Pt    0.1867    0.5769    0.9850
Pt    0.1877    0.6210    0.9387
Pt    0.1861    0.6205    0.9823
Pt    0.1873    0.6672    0.9395
Pt    0.1881    0.6664    0.9854
Pt    0.1871    0.7120    0.8934
Pt    0.1885    0.7130    0.9377
Pt    0.1907    0.7116    0.9848
Pt    0.2362    0.5309    0.8935
Pt    0.2363    0.5310    0.9380
Pt    0.2350    0.5297    0.9839
Pt    0.2350    0.5794    0.8948
Pt    0.2344    0.5770    0.9394
Pt    0.2356    0.5750    0.9853
Pt    0.2337    0.6214    0.9836
Pt    0.2354    0.6652    0.9380
Pt    0.2354    0.6643    0.9839
Pt    0.2349    0.7102    0.8935
Pt    0.2335    0.7108    0.9380
Pt    0.2357    0.7108    0.9823
Pt    0.0306    0.5557    0.8932
Pt    0.0304    0.5543    0.9376
Pt    0.0313    0.5531    0.9831
Pt    0.0314    0.5987    0.9381
Pt    0.0307    0.5976    0.9844
Pt    0.0303    0.6428    0.9373
Pt    0.0295    0.6450    0.9835
Pt    0.0296    0.6881    0.9364
Pt    0.0315    0.6880    0.9867
Pt    0.0317    0.7359    0.8948
Pt    0.0296    0.7339    0.9379
Pt    0.0321    0.7348    0.9853
Pt    0.0777    0.5563    0.8918
Pt    0.0768    0.5540    0.9378
Pt    0.0773    0.5542    0.9851
Pt    0.0780    0.5981    0.9377
Pt    0.0764    0.5994    0.9861
Pt    0.0768    0.6437    0.9403
Pt    0.0778    0.6454    0.9844
Pt    0.0787    0.6872    0.8938
Pt    0.0759    0.6890    0.9375
Pt    0.0775    0.6870    0.9846
Pt    0.0766    0.7335    0.9374
Pt    0.0753    0.7341    0.9835
Pt    0.1221    0.5543    0.9356
Pt    0.1226    0.5552    0.9816
Pt    0.1207    0.6875    0.9397
Pt    0.1207    0.7356    0.9354
Pt    0.1198    0.7328    0.9863
Pt    0.1668    0.5523    0.9343
Pt    0.1663    0.5547    0.9840
Pt    0.1670    0.5990    0.9364
Pt    0.1668    0.6913    0.9384
Pt    0.1657    0.6878    0.9854
Pt    0.1656    0.7348    0.9380
Pt    0.1662    0.7333    0.9850
Pt    0.2126    0.5530    0.8927
Pt    0.2122    0.5551    0.9383
Pt    0.2103    0.5551    0.9823
Pt    0.2108    0.5994    0.9371
Pt    0.2100    0.5996    0.9838
Pt    0.2087    0.6445    0.9386
Pt    0.2116    0.6439    0.9832
Pt    0.2125    0.6864    0.8935
Pt    0.2098    0.6874    0.9374
Pt    0.2138    0.6882    0.9838
Pt    0.2082    0.7347    0.8918
Pt    0.2108    0.7346    0.9371
Pt    0.2121    0.7350    0.9841
Pt    0.0090    0.5979    0.9606
Pt    0.0077    0.7347    0.9596
Pt    0.1655    0.5777    0.0070
Pt    0.0093    0.5294    0.9842
Pt    0.0539    0.5071    0.9146
Pt    0.2121    0.5078    0.8925
Pt    0.0794    0.5074    0.9826
Pt    0.0089    0.7109    0.8942
Pt    0.0085    0.5075    0.9615
Pt    0.1452    0.5077    0.9611
Pt    0.1881    0.5073    0.9148
Pt    0.0084    0.6204    0.9342
Pt    0.0312    0.5321    0.9144
Pt    0.0330    0.5297    0.9613
Pt    0.0319    0.5767    0.9156
Pt    0.0313    0.5764    0.9612
Pt    0.0295    0.6213    0.9604
Pt    0.0302    0.6667    0.9594
Pt    0.0310    0.7105    0.9139
Pt    0.0304    0.7109    0.9616
Pt    0.0796    0.5326    0.9139
Pt    0.0772    0.5321    0.9608
Pt    0.0772    0.5763    0.9162
Pt    0.0780    0.5766    0.9607
Pt    0.0783    0.6212    0.9623
Pt    0.0775    0.6646    0.9161
Pt    0.0778    0.6654    0.9611
Pt    0.0779    0.7112    0.9147
Pt    0.0753    0.7112    0.9595
Pt    0.1239    0.5302    0.9583
Pt    0.1233    0.5759    0.9591
Pt    0.1211    0.7112    0.9619
Pt    0.0325    0.5078    0.9383
Pt    0.0085    0.5767    0.9846
Pt    0.1885    0.5093    0.0067
Pt    0.0087    0.6886    0.9604
Pt    0.1218    0.5320    0.0068
Pt    0.1670    0.5076    0.9364
Pt    0.0769    0.5078    0.8947
Pt    0.0559    0.5077    0.9589
Pt    0.2573    0.5083    0.9844
Pt    0.1222    0.5076    0.9819
Pt    0.0075    0.6673    0.9842
Pt    0.0083    0.5555    0.9155
Pt    0.2566    0.7345    0.9383
Pt    0.2113    0.5085    0.9844
Pt    0.2572    0.5544    0.9839
Pt    0.1009    0.5091    0.9584
Pt    0.1431    0.7543    0.9838
Pt    0.1652    0.7563    0.9614
Pt    0.0082    0.5532    0.9603
Pt    0.2570    0.6866    0.9382
Pt    0.1015    0.5547    0.0057
Pt    0.0778    0.5085    0.9366
Pt    0.0088    0.5295    0.9378
Pt    0.2568    0.7354    0.9849
Pt    0.1220    0.7555    0.0073
Pt    0.0299    0.6212    0.0069
Pt    0.2565    0.6206    0.9607
Pt    0.0770    0.7557    0.9171
Pt    0.0758    0.7562    0.9599
Pt    0.2562    0.5993    0.9380
Pt    0.0082    0.5768    0.9378
Pt    0.1414    0.5583    0.0064
Pt    0.1904    0.7356    0.0060
Pt    0.0319    0.5759    0.0063
Pt    0.1887    0.5530    0.0066
Pt    0.0316    0.5302    0.0069
Pt    0.2104    0.6218    0.0064
Pt    0.2348    0.5981    0.0067
Pt    0.0089    0.5528    0.0068
Pt    0.2345    0.7570    0.8928
Pt    0.2125    0.7113    0.0072
Pt    0.0759    0.9376    0.0538
Pt    0.0769    0.9397    0.0996
Pt    0.0083    0.9158    0.0081
Pt    0.0765    0.7573    0.0535
Pt    0.2086    0.8925    0.0079
Pt    0.0084    0.7812    0.1000
Pt    0.0301    0.8027    0.0553
Pt    0.0527    0.7575    0.0313
Pt    0.0082    0.9845    0.1192
Pt    0.2341    0.7576    0.0770
Pt    0.0990    0.7575    0.0310
Pt    0.2330    0.8259    0.0088
Pt    0.0306    0.7584    0.0077
Pt    0.1444    0.7582    0.0789
Pt    0.0532    0.7809    0.0537
Pt    0.0552    0.7799    0.1008
Pt    0.1879    0.7578    0.0294
Pt    0.0539    0.8270    0.0535
Pt    0.0523    0.8268    0.0997
Pt    0.0302    0.7575    0.0540
Pt    0.0536    0.8711    0.0526
Pt    0.0534    0.0069    0.0095
Pt    0.0530    0.9164    0.0543
Pt    0.1846    0.8705    0.0091
Pt    0.0539    0.9592    0.0530
Pt    0.0538    0.9614    0.0983
Pt    0.0084    0.9615    0.0972
Pt    0.0994    0.7801    0.0552
Pt    0.1658    0.8029    0.0092
Pt    0.1011    0.8271    0.0488
Pt    0.0999    0.8261    0.0986
Pt    0.1666    0.0049    0.0304
Pt    0.0986    0.9605    0.0519
Pt    0.1857    0.9149    0.0086
Pt    0.1446    0.7806    0.0536
Pt    0.1402    0.8264    0.0538
Pt    0.2111    0.7576    0.0531
Pt    0.1419    0.9609    0.0547
Pt    0.0546    0.0064    0.0986
Pt    0.1869    0.7785    0.0516
Pt    0.1874    0.7804    0.0976
Pt    0.2114    0.8027    0.0074
Pt    0.1870    0.8268    0.0538
Pt    0.1887    0.8276    0.0981
Pt    0.0569    0.7580    0.1222
Pt    0.1897    0.8725    0.0547
Pt    0.1866    0.0066    0.0985
Pt    0.1889    0.9168    0.0530
Pt    0.1876    0.9180    0.1007
Pt    0.0084    0.9388    0.0768
Pt    0.1882    0.9594    0.0531
Pt    0.1869    0.9627    0.0988
Pt    0.0084    0.9841    0.0762
Pt    0.2368    0.7798    0.0550
Pt    0.2343    0.7813    0.0991
Pt    0.1887    0.7800    0.0077
Pt    0.2333    0.8248    0.0530
Pt    0.2323    0.8277    0.0993
Pt    0.1006    0.8254    0.0092
Pt    0.2348    0.8717    0.0550
Pt    0.0776    0.8498    0.0986
Pt    0.2345    0.9159    0.0531
Pt    0.0784    0.8487    0.0521
Pt    0.2342    0.9609    0.0522
Pt    0.2354    0.9612    0.1001
Pt    0.0764    0.8044    0.1017
Pt    0.1660    0.9835    0.0517
Pt    0.0770    0.8034    0.0547
Pt    0.2104    0.9837    0.0974
Pt    0.2104    0.9816    0.0528
Pt    0.0773    0.8925    0.0539
Pt    0.2128    0.9376    0.0987
Pt    0.2116    0.9385    0.0531
Pt    0.0309    0.9844    0.0980
Pt    0.2128    0.8940    0.0540
Pt    0.0308    0.9845    0.0533
Pt    0.2110    0.8495    0.0534
Pt    0.0288    0.9346    0.0993
Pt    0.2099    0.8044    0.0979
Pt    0.2097    0.8033    0.0540
Pt    0.1637    0.9407    0.0983
Pt    0.1641    0.9368    0.0521
Pt    0.0303    0.9385    0.0520
Pt    0.0533    0.8028    0.0310
Pt    0.0538    0.8045    0.0778
Pt    0.0534    0.8031    0.1222
Pt    0.0543    0.8486    0.0297
Pt    0.0524    0.8484    0.0750
Pt    0.0547    0.8943    0.0293
Pt    0.0534    0.8921    0.0757
Pt    0.0532    0.9374    0.0288
Pt    0.0525    0.9363    0.0787
Pt    0.0549    0.9385    0.1198
Pt    0.0542    0.9836    0.0291
Pt    0.0546    0.9844    0.0749
Pt    0.0558    0.9828    0.1198
Pt    0.1660    0.8037    0.0525
Pt    0.0298    0.8915    0.0536
Pt    0.0984    0.8024    0.0308
Pt    0.0983    0.8010    0.0791
Pt    0.1002    0.8488    0.0753
Pt    0.0986    0.9356    0.0297
Pt    0.0980    0.9359    0.0758
Pt    0.1006    0.9835    0.0303
Pt    0.1020    0.9867    0.0776
Pt    0.1213    0.9847    0.0546
Pt    0.0294    0.8491    0.0532
Pt    0.1415    0.8038    0.0310
Pt    0.1431    0.8047    0.0766
Pt    0.1422    0.9373    0.0774
Pt    0.1429    0.9834    0.0313
Pt    0.1218    0.9367    0.0530
Pt    0.1209    0.8027    0.0536
Pt    0.1881    0.8036    0.0318
Pt    0.1875    0.8043    0.0759
Pt    0.1891    0.8040    0.1206
Pt    0.1885    0.8486    0.0314
Pt    0.1882    0.8490    0.0782
Pt    0.1879    0.8927    0.0313
Pt    0.1900    0.8946    0.0772
Pt    0.1878    0.9393    0.0299
Pt    0.1871    0.9398    0.0759
Pt    0.1874    0.9406    0.1198
Pt    0.1876    0.9821    0.0287
Pt    0.1861    0.9835    0.0759
Pt    0.1885    0.9838    0.1201
Pt    0.0290    0.8057    0.0998
Pt    0.0806    0.9827    0.0994
Pt    0.0771    0.9835    0.0528
Pt    0.2354    0.8011    0.0303
Pt    0.2350    0.8031    0.0754
Pt    0.2338    0.8041    0.1206
Pt    0.2350    0.8480    0.0329
Pt    0.2347    0.8495    0.0775
Pt    0.2344    0.8933    0.0295
Pt    0.2351    0.9386    0.0296
Pt    0.2358    0.9368    0.0767
Pt    0.2349    0.9367    0.1209
Pt    0.2361    0.9839    0.0291
Pt    0.2340    0.9836    0.0751
Pt    0.2331    0.9858    0.1202
Pt    0.0295    0.7812    0.0303
Pt    0.0311    0.7812    0.0785
Pt    0.0309    0.7801    0.1213
Pt    0.0302    0.8258    0.0314
Pt    0.0285    0.8272    0.0765
Pt    0.0318    0.8697    0.0293
Pt    0.0314    0.8711    0.0762
Pt    0.0306    0.9157    0.0310
Pt    0.0303    0.9132    0.0768
Pt    0.0325    0.9614    0.0287
Pt    0.0307    0.9595    0.0755
Pt    0.0304    0.9580    0.1199
Pt    0.0760    0.7802    0.0302
Pt    0.0755    0.7789    0.0763
Pt    0.0751    0.8258    0.0292
Pt    0.0757    0.8258    0.0789
Pt    0.0758    0.8275    0.1223
Pt    0.0774    0.8712    0.0282
Pt    0.0776    0.8700    0.0747
Pt    0.0780    0.9147    0.0315
Pt    0.0741    0.9153    0.0785
Pt    0.0764    0.9614    0.0297
Pt    0.0767    0.9618    0.0763
Pt    0.0792    0.9617    0.1223
Pt    0.1213    0.7799    0.0294
Pt    0.1216    0.7805    0.0766
Pt    0.1198    0.8243    0.0770
Pt    0.1227    0.9599    0.0308
Pt    0.1178    0.9595    0.0743
Pt    0.1649    0.7791    0.0299
Pt    0.1647    0.7817    0.0776
Pt    0.1639    0.8269    0.0318
Pt    0.1651    0.8277    0.0759
Pt    0.1649    0.9170    0.0745
Pt    0.1633    0.9592    0.0287
Pt    0.1626    0.9624    0.0758
Pt    0.2118    0.7792    0.0301
Pt    0.2102    0.7800    0.0745
Pt    0.2113    0.7805    0.1207
Pt    0.2111    0.8251    0.0309
Pt    0.2126    0.8272    0.0761
Pt    0.2089    0.8287    0.1223
Pt    0.2115    0.8702    0.0306
Pt    0.2123    0.8711    0.0782
Pt    0.2096    0.9159    0.0294
Pt    0.2121    0.9161    0.0761
Pt    0.2112    0.9617    0.0290
Pt    0.2112    0.9600    0.0762
Pt    0.2100    0.9611    0.1214
Pt    0.1888    0.0067    0.0523
Pt    0.2330    0.8706    0.0081
Pt    0.2116    0.0049    0.0291
Pt    0.2555    0.9610    0.0756
Pt    0.0537    0.7802    0.0081
Pt    0.0078    0.9158    0.0536
Pt    0.2559    0.9141    0.0296
Pt    0.2562    0.8272    0.0761
Pt    0.2571    0.8926    0.0529
Pt    0.2565    0.8483    0.0546
Pt    0.2564    0.9839    0.0993
Pt    0.2108    0.7575    0.0990
Pt    0.2572    0.9122    0.0774
Pt    0.2342    0.7575    0.1206
Pt    0.1868    0.8248    0.0077
Pt    0.0078    0.7824    0.0076
Pt    0.2340    0.0069    0.0525
Pt    0.0080    0.9398    0.0291
Pt    0.0081    0.9633    0.0521
Pt    0.2565    0.8054    0.0986
Pt    0.0778    0.0063    0.0780
Pt    0.2093    0.0064    0.0753
Pt    0.0309    0.0069    0.1200
Pt    0.0775    0.0065    0.0310
Pt    0.2084    0.0059    0.1204
Pt    0.0303    0.9849    0.0074
Pt    0.0076    0.8031    0.2088
Pt    0.0075    0.8510    0.2104
Pt    0.0079    0.7803    0.1426
Pt    0.1431    0.7579    0.2116
Pt    0.0077    0.8708    0.1872
Pt    0.0091    0.8931    0.2095
Pt    0.0090    0.9171    0.2352
Pt    0.0078    0.9382    0.2114
Pt    0.1199    0.8282    0.2573
Pt    0.1637    0.7576    0.1858
Pt    0.0080    0.8717    0.2337
Pt    0.0081    0.9594    0.1417
Pt    0.0546    0.7789    0.1448
Pt    0.0535    0.7794    0.1887
Pt    0.0531    0.7798    0.2332
Pt    0.0517    0.8266    0.1418
Pt    0.0525    0.8265    0.1872
Pt    0.0528    0.8248    0.2334
Pt    0.0553    0.8694    0.1892
Pt    0.0580    0.8722    0.2352
Pt    0.0539    0.9168    0.1898
Pt    0.0549    0.9180    0.2346
Pt    0.0533    0.9583    0.1416
Pt    0.0534    0.9608    0.1875
Pt    0.0536    0.9625    0.2358
Pt    0.0991    0.7800    0.1879
Pt    0.0993    0.7800    0.2358
Pt    0.0976    0.8226    0.1876
Pt    0.0988    0.8277    0.2325
Pt    0.0985    0.9152    0.1886
Pt    0.0995    0.9628    0.1870
Pt    0.0982    0.9612    0.2365
Pt    0.1433    0.7821    0.1885
Pt    0.1431    0.7797    0.2354
Pt    0.1420    0.8264    0.1873
Pt    0.1424    0.8282    0.2344
Pt    0.1422    0.9606    0.1878
Pt    0.1419    0.9608    0.2347
Pt    0.1864    0.7798    0.1892
Pt    0.1868    0.7815    0.2349
Pt    0.1863    0.8258    0.1434
Pt    0.1867    0.8280    0.1894
Pt    0.1853    0.8312    0.2351
Pt    0.1891    0.8703    0.1876
Pt    0.1874    0.9127    0.1894
Pt    0.1865    0.9146    0.2321
Pt    0.1861    0.9605    0.1430
Pt    0.1877    0.9597    0.1893
Pt    0.1875    0.9605    0.2342
Pt    0.2345    0.7795    0.1440
Pt    0.2323    0.7813    0.1880
Pt    0.2336    0.7797    0.2343
Pt    0.2336    0.8262    0.1431
Pt    0.2329    0.8260    0.1878
Pt    0.2343    0.8260    0.2341
Pt    0.2344    0.8723    0.2330
Pt    0.2348    0.9140    0.1875
Pt    0.2331    0.9149    0.2340
Pt    0.2349    0.9598    0.1429
Pt    0.2343    0.9594    0.1895
Pt    0.2337    0.9606    0.2349
Pt    0.1660    0.9842    0.2333
Pt    0.1660    0.9828    0.1856
Pt    0.1653    0.9375    0.2332
Pt    0.2107    0.9839    0.2360
Pt    0.2090    0.9827    0.1857
Pt    0.2125    0.9844    0.1438
Pt    0.2100    0.9373    0.2344
Pt    0.2107    0.9365    0.1873
Pt    0.2107    0.9360    0.1433
Pt    0.2095    0.8938    0.2340
Pt    0.2108    0.8916    0.1881
Pt    0.2111    0.8477    0.2349
Pt    0.2117    0.8498    0.1864
Pt    0.2108    0.8036    0.2348
Pt    0.2080    0.8036    0.1870
Pt    0.2116    0.8029    0.1415
Pt    0.1655    0.9372    0.1873
Pt    0.1639    0.8487    0.1878
Pt    0.1643    0.8042    0.2350
Pt    0.0537    0.8034    0.1642
Pt    0.0508    0.8039    0.2106
Pt    0.1215    0.7572    0.1876
Pt    0.0530    0.8486    0.2118
Pt    0.2105    0.7591    0.1420
Pt    0.0540    0.8934    0.2125
Pt    0.0087    0.8946    0.2562
Pt    0.0527    0.9373    0.1646
Pt    0.0550    0.9385    0.2115
Pt    0.2336    0.7573    0.2110
Pt    0.0549    0.9843    0.1647
Pt    0.0545    0.9836    0.2103
Pt    0.1872    0.0064    0.1873
Pt    0.1659    0.8037    0.1897
Pt    0.1199    0.9844    0.2353
Pt    0.0993    0.8019    0.2118
Pt    0.1877    0.7592    0.1644
Pt    0.0986    0.9388    0.1652
Pt    0.0983    0.9389    0.2110
Pt    0.0778    0.8463    0.1912
Pt    0.0987    0.9860    0.2111
Pt    0.2572    0.9359    0.1866
Pt    0.1199    0.9386    0.2352
Pt    0.1185    0.9372    0.1905
Pt    0.1419    0.8053    0.2110
Pt    0.0752    0.8484    0.2342
Pt    0.1432    0.9374    0.2102
Pt    0.0783    0.8026    0.1441
Pt    0.1425    0.9841    0.2112
Pt    0.2567    0.9367    0.2345
Pt    0.1203    0.8050    0.2342
Pt    0.1214    0.8036    0.1883
Pt    0.0754    0.9851    0.2342
Pt    0.1870    0.8011    0.1642
Pt    0.1871    0.8046    0.2142
Pt    0.0084    0.9155    0.1867
Pt    0.1856    0.8489    0.1649
Pt    0.1866    0.8518    0.2132
Pt    0.2571    0.9144    0.2108
Pt    0.1880    0.8910    0.2109
Pt    0.1876    0.9378    0.1652
Pt    0.1886    0.9371    0.2108
Pt    0.0089    0.9833    0.1642
Pt    0.1857    0.9824    0.1634
Pt    0.1885    0.9827    0.2110
Pt    0.0074    0.0066    0.2348
Pt    0.0762    0.9839    0.1892
Pt    0.0773    0.9843    0.1429
Pt    0.0752    0.9402    0.2360
Pt    0.2345    0.8043    0.1650
Pt    0.2326    0.8032    0.2105
Pt    0.0324    0.9825    0.1411
Pt    0.2342    0.8481    0.2104
Pt    0.0755    0.8035    0.1880
Pt    0.2349    0.8920    0.2101
Pt    0.0318    0.9822    0.1862
Pt    0.2336    0.9358    0.1654
Pt    0.2338    0.9366    0.2111
Pt    0.2566    0.9837    0.2337
Pt    0.2348    0.9829    0.1660
Pt    0.2313    0.9826    0.2133
Pt    0.0757    0.8021    0.2344
Pt    0.0303    0.7804    0.1659
Pt    0.0293    0.7810    0.2104
Pt    0.0305    0.8488    0.1888
Pt    0.0312    0.8271    0.1641
Pt    0.0288    0.8265    0.2101
Pt    0.0293    0.8041    0.2344
Pt    0.0316    0.8710    0.2130
Pt    0.0083    0.9621    0.1883
Pt    0.0291    0.9162    0.2103
Pt    0.0317    0.9401    0.2341
Pt    0.0307    0.9609    0.1638
Pt    0.0315    0.9607    0.2108
Pt    0.2107    0.9593    0.2114
Pt    0.0774    0.7799    0.1670
Pt    0.0764    0.7799    0.2113
Pt    0.0748    0.9367    0.1435
Pt    0.0744    0.8268    0.1647
Pt    0.0742    0.8237    0.2121
Pt    0.0309    0.9840    0.2355
Pt    0.0781    0.8704    0.2108
Pt    0.0755    0.9161    0.1672
Pt    0.0776    0.9136    0.2128
Pt    0.0334    0.8943    0.2353
Pt    0.0763    0.9607    0.1648
Pt    0.0758    0.9625    0.2122
Pt    0.0314    0.9387    0.1864
Pt    0.1223    0.7803    0.2107
Pt    0.2561    0.7807    0.2117
Pt    0.1197    0.8274    0.2095
Pt    0.2105    0.9599    0.1643
Pt    0.1192    0.9621    0.2106
Pt    0.0308    0.8034    0.1864
Pt    0.1647    0.7817    0.2125
Pt    0.2558    0.8038    0.1885
Pt    0.1659    0.8249    0.1664
Pt    0.1639    0.8280    0.2118
Pt    0.2310    0.8931    0.2569
Pt    0.1646    0.9611    0.2102
Pt    0.0759    0.9391    0.1889
Pt    0.2105    0.7809    0.1647
Pt    0.2099    0.7802    0.2116
Pt    0.0316    0.8941    0.1876
Pt    0.2077    0.8252    0.1655
Pt    0.2101    0.8259    0.2108
Pt    0.0295    0.8035    0.1436
Pt    0.2117    0.8692    0.2120
Pt    0.0311    0.8486    0.2339
Pt    0.2108    0.9141    0.2101
Pt    0.0747    0.8915    0.1885
Pt    0.2561    0.9596    0.1658
Pt    0.2106    0.7587    0.1895
Pt    0.0293    0.7577    0.2343
Pt    0.2322    0.7574    0.2573
Pt    0.0079    0.9838    0.2119
Pt    0.2564    0.9612    0.2566
Pt    0.2564    0.7808    0.1675
Pt    0.0079    0.7584    0.2112
Pt    0.1637    0.0067    0.2079
Pt    0.0304    0.0051    0.2118
Pt    0.1877    0.0070    0.2350
Pt    0.2554    0.8271    0.1661
Pt    0.2569    0.8261    0.2114
Pt    0.2558    0.8031    0.2326
Pt    0.0533    0.0070    0.1416
Pt    0.0308    0.0066    0.1653
Pt    0.2100    0.0056    0.2121
Pt    0.2103    0.0069    0.1664
Pt    0.1875    0.0064    0.1436
Pt    0.2328    0.0059    0.1899
Pt    0.2569    0.9832    0.1891
Pt    0.0533    0.0064    0.1870
Pt    0.2562    0.0062    0.1658
Pt    0.0755    0.8252    0.2560
Pt    0.1438    0.0066    0.2351
Pt    0.1212    0.7575    0.2344
Pt    0.0546    0.8488    0.2568
Pt    0.0980    0.0070    0.2330
Pt    0.1864    0.9388    0.2560
Pt    0.1214    0.0061    0.2097
Pt    0.0522    0.9856    0.2573
Pt    0.0562    0.8942    0.2571
Pt    0.0089    0.7571    0.2569
Pt    0.0309    0.9175    0.2571
Pt    0.2560    0.9149    0.2565
Pt    0.2106    0.7819    0.2570
Pt    0.1654    0.9618    0.2569
Pt    0.0296    0.8278    0.2569
Pt    0.2569    0.8710    0.2569
Pt    0.2331    0.9371    0.2572
Pt    0.1646    0.7804    0.2581
Pt    0.1659    0.7577    0.2810
Pt    0.0519    0.9405    0.2585
Pt    0.0985    0.9392    0.2576
Pt    0.0987    0.8051    0.2576
Pt    0.2550    0.8288    0.3506
Pt    0.2112    0.7590    0.2815
Pt    0.0092    0.8047    0.3485
Pt    0.0075    0.8945    0.3032
Pt    0.1884    0.7579    0.2575
Pt    0.0085    0.8705    0.2807
Pt    0.0084    0.7821    0.3728
Pt    0.0532    0.7797    0.2803
Pt    0.0543    0.7791    0.3273
Pt    0.0551    0.7788    0.3715
Pt    0.0521    0.8252    0.2821
Pt    0.0551    0.8267    0.3269
Pt    0.0520    0.8271    0.3718
Pt    0.0545    0.8713    0.2800
Pt    0.0535    0.8720    0.3275
Pt    0.0535    0.9158    0.2813
Pt    0.0518    0.9163    0.3252
Pt    0.0537    0.9638    0.2815
Pt    0.0534    0.9607    0.3283
Pt    0.0539    0.9608    0.3704
Pt    0.0992    0.7819    0.2801
Pt    0.1002    0.7799    0.3279
Pt    0.0986    0.8273    0.2814
Pt    0.0972    0.8270    0.3275
Pt    0.0981    0.9174    0.3278
Pt    0.0995    0.9605    0.2808
Pt    0.0988    0.9601    0.3276
Pt    0.1422    0.7830    0.2817
Pt    0.1435    0.7808    0.3278
Pt    0.1417    0.8288    0.2827
Pt    0.1427    0.8257    0.3263
Pt    0.1433    0.9613    0.2817
Pt    0.1426    0.9616    0.3292
Pt    0.1877    0.7815    0.2807
Pt    0.1872    0.7802    0.3265
Pt    0.1859    0.8289    0.2822
Pt    0.1870    0.8255    0.3282
Pt    0.1883    0.8258    0.3719
Pt    0.1884    0.8717    0.3286
Pt    0.1854    0.9154    0.2805
Pt    0.1887    0.9139    0.3275
Pt    0.1884    0.9611    0.2811
Pt    0.1875    0.9616    0.3259
Pt    0.1836    0.9607    0.3693
Pt    0.2338    0.7809    0.2805
Pt    0.2335    0.7818    0.3290
Pt    0.2331    0.7786    0.3739
Pt    0.2331    0.8260    0.2808
Pt    0.2323    0.8255    0.3262
Pt    0.2319    0.8272    0.3722
Pt    0.2322    0.8717    0.2816
Pt    0.2325    0.9154    0.2806
Pt    0.2349    0.9151    0.3251
Pt    0.2347    0.9618    0.2828
Pt    0.2332    0.9610    0.3273
Pt    0.2345    0.9616    0.3709
Pt    0.2075    0.8921    0.2803
Pt    0.2112    0.8483    0.3272
Pt    0.2098    0.8488    0.2818
Pt    0.2102    0.9822    0.3706
Pt    0.2115    0.9851    0.3271
Pt    0.2114    0.9833    0.2792
Pt    0.2112    0.9378    0.3696
Pt    0.2121    0.9373    0.3261
Pt    0.2097    0.9382    0.2818
Pt    0.2119    0.8937    0.3282
Pt    0.2124    0.8031    0.3726
Pt    0.2101    0.8027    0.3283
Pt    0.0529    0.8029    0.3028
Pt    0.0543    0.8031    0.3481
Pt    0.0540    0.8494    0.3044
Pt    0.0544    0.8927    0.3033
Pt    0.0530    0.9381    0.3037
Pt    0.0521    0.9366    0.3507
Pt    0.0543    0.9861    0.3046
Pt    0.0540    0.9851    0.3498
Pt    0.2085    0.8047    0.2811
Pt    0.0984    0.8049    0.3040
Pt    0.0982    0.9372    0.3025
Pt    0.0971    0.9396    0.3496
Pt    0.0987    0.9852    0.3055
Pt    0.1645    0.9837    0.3275
Pt    0.1412    0.8036    0.3039
Pt    0.1426    0.9387    0.3046
Pt    0.1415    0.9842    0.3047
Pt    0.1652    0.9837    0.2816
Pt    0.1652    0.9388    0.3293
Pt    0.1870    0.8035    0.3029
Pt    0.1871    0.8001    0.3528
Pt    0.1862    0.8497    0.3066
Pt    0.1889    0.8491    0.3485
Pt    0.1861    0.8930    0.3024
Pt    0.1865    0.9360    0.3060
Pt    0.1885    0.9383    0.3490
Pt    0.1897    0.9846    0.3027
Pt    0.1876    0.9834    0.3488
Pt    0.1658    0.9393    0.2811
Pt    0.1641    0.8483    0.3293
Pt    0.2328    0.8030    0.3045
Pt    0.2339    0.8027    0.3518
Pt    0.2330    0.8488    0.3047
Pt    0.2324    0.8931    0.3042
Pt    0.2337    0.9374    0.3038
Pt    0.2329    0.9362    0.3494
Pt    0.2330    0.9836    0.3035
Pt    0.2350    0.9846    0.3492
Pt    0.0309    0.7807    0.3039
Pt    0.0322    0.7803    0.3495
Pt    0.0303    0.8265    0.3057
Pt    0.0313    0.8257    0.3494
Pt    0.0304    0.8716    0.3052
Pt    0.0292    0.9169    0.3041
Pt    0.0313    0.9608    0.3051
Pt    0.0296    0.9594    0.3511
Pt    0.0769    0.7799    0.3040
Pt    0.0781    0.7776    0.3496
Pt    0.0751    0.8272    0.3048
Pt    0.0769    0.8257    0.3492
Pt    0.0767    0.8704    0.3051
Pt    0.0762    0.9154    0.3031
Pt    0.0754    0.9155    0.3496
Pt    0.0766    0.9615    0.3053
Pt    0.0751    0.9608    0.3498
Pt    0.1204    0.7808    0.3046
Pt    0.1206    0.8305    0.3054
Pt    0.1214    0.9617    0.3058
Pt    0.1658    0.7790    0.3035
Pt    0.1639    0.8282    0.3039
Pt    0.1645    0.8243    0.3518
Pt    0.1655    0.9613    0.3044
Pt    0.2095    0.7811    0.3045
Pt    0.2104    0.7795    0.3505
Pt    0.2098    0.8265    0.3046
Pt    0.2115    0.8254    0.3501
Pt    0.2098    0.8713    0.3050
Pt    0.2094    0.9144    0.3038
Pt    0.2113    0.9603    0.3051
Pt    0.2117    0.9596    0.3488
Pt    0.2109    0.9603    0.2585
Pt    0.2568    0.7820    0.2576
Pt    0.0077    0.7804    0.3265
Pt    0.0075    0.8031    0.3044
Pt    0.0082    0.7582    0.3511
Pt    0.2105    0.7576    0.3266
Pt    0.2107    0.8267    0.2578
Pt    0.1420    0.8059    0.2581
Pt    0.1653    0.8030    0.3285
Pt    0.1640    0.8049    0.2813
Pt    0.1203    0.9846    0.2797
Pt    0.0292    0.8044    0.2804
Pt    0.0304    0.8035    0.3263
Pt    0.0329    0.8022    0.3715
Pt    0.0323    0.8490    0.2807
Pt    0.0307    0.8501    0.3290
Pt    0.0305    0.8934    0.2806
Pt    0.0305    0.8933    0.3274
Pt    0.0297    0.9391    0.2821
Pt    0.0281    0.9369    0.3287
Pt    0.0304    0.9851    0.2833
Pt    0.0317    0.9839    0.3264
Pt    0.0307    0.9830    0.3714
Pt    0.1206    0.9370    0.3266
Pt    0.1214    0.9377    0.2817
Pt    0.0749    0.8032    0.2802
Pt    0.0772    0.8030    0.3267
Pt    0.0759    0.8024    0.3687
Pt    0.0771    0.8476    0.2808
Pt    0.0759    0.8501    0.3276
Pt    0.0764    0.8934    0.3274
Pt    0.0750    0.9403    0.2809
Pt    0.0754    0.9372    0.3250
Pt    0.0755    0.9384    0.3726
Pt    0.0772    0.9842    0.2818
Pt    0.0782    0.9852    0.3290
Pt    0.0786    0.9841    0.3719
Pt    0.1206    0.8045    0.3280
Pt    0.1205    0.8062    0.2821
Pt    0.2351    0.9836    0.2581
Pt    0.2532    0.8498    0.3270
Pt    0.1428    0.9855    0.2579
Pt    0.0529    0.0071    0.3272
Pt    0.0526    0.0065    0.2804
Pt    0.0775    0.7580    0.2804
Pt    0.1217    0.7824    0.2587
Pt    0.1860    0.8065    0.2578
Pt    0.2573    0.9608    0.3049
Pt    0.2556    0.8257    0.2586
Pt    0.1876    0.7572    0.3034
Pt    0.0760    0.9632    0.2582
Pt    0.0082    0.9148    0.2798
Pt    0.2571    0.8502    0.2820
Pt    0.0078    0.8723    0.3281
Pt    0.2329    0.8499    0.2589
Pt    0.1627    0.8301    0.2603
Pt    0.2573    0.9845    0.3708
Pt    0.2328    0.7581    0.3023
Pt    0.2570    0.8256    0.3048
Pt    0.1438    0.0067    0.2819
Pt    0.1895    0.0063    0.3714
Pt    0.2570    0.9843    0.3262
Pt    0.0081    0.9842    0.3498
Pt    0.2559    0.7813    0.3032
Pt    0.0978    0.9846    0.2574
Pt    0.0299    0.7579    0.3258
Pt    0.1665    0.0062    0.3045
Pt    0.0075    0.8270    0.3267
Pt    0.0279    0.9634    0.2589
Pt    0.2555    0.8722    0.3049
Pt    0.2330    0.8038    0.2575
Pt    0.0075    0.8275    0.2811
Pt    0.1869    0.0066    0.3280
Pt    0.0764    0.9172    0.2600
Pt    0.2572    0.9376    0.3709
Pt    0.2569    0.9146    0.3056
Pt    0.2562    0.9593    0.3488
Pt    0.2560    0.9364    0.2816
Pt    0.2554    0.8041    0.3283
Pt    0.1438    0.9388    0.2588
Pt    0.2564    0.7577    0.3269
Pt    0.2547    0.8929    0.2800
Pt    0.2558    0.9855    0.2811
Pt    0.2098    0.8716    0.2580
Pt    0.0528    0.8033    0.2579
Pt    0.1878    0.9834    0.2585
Pt    0.2088    0.9152    0.2579
Pt    0.0755    0.7797    0.2580
Pt    0.0297    0.7811    0.2578
Pt    0.1215    0.9620    0.2590
Pt    0.0333    0.8712    0.2578
Pt    0.1869    0.8516    0.2604
Pt    0.0311    0.7573    0.2808
Pt    0.0296    0.7574    0.5069
Pt    0.0092    0.8058    0.3911
Pt    0.2349    0.9142    0.5059
Pt    0.0076    0.8031    0.4377
Pt    0.0078    0.9600    0.4618
Pt    0.0990    0.7588    0.4834
Pt    0.0079    0.8250    0.4606
Pt    0.0082    0.7812    0.4163
Pt    0.2109    0.9823    0.5059
Pt    0.1430    0.7581    0.4842
Pt    0.0090    0.0068    0.4152
Pt    0.0080    0.8728    0.4603
Pt    0.0078    0.8030    0.4825
Pt    0.0539    0.7809    0.4147
Pt    0.0545    0.7798    0.4600
Pt    0.0529    0.7585    0.4855
Pt    0.0519    0.8272    0.4129
Pt    0.0543    0.8271    0.4635
Pt    0.1647    0.9366    0.5064
Pt    0.0547    0.8720    0.4591
Pt    0.0087    0.9837    0.4380
Pt    0.0555    0.9151    0.4608
Pt    0.2569    0.9379    0.4147
Pt    0.0534    0.9608    0.4160
Pt    0.0531    0.9607    0.4598
Pt    0.2560    0.9592    0.4378
Pt    0.0994    0.7800    0.4600
Pt    0.2112    0.0069    0.4836
Pt    0.0977    0.8252    0.4158
Pt    0.1000    0.8289    0.4571
Pt    0.1874    0.0064    0.4158
Pt    0.0996    0.9622    0.4611
Pt    0.0533    0.0060    0.4166
Pt    0.1439    0.7812    0.4615
Pt    0.2570    0.0070    0.3940
Pt    0.1434    0.8266    0.4619
Pt    0.1428    0.9626    0.4607
Pt    0.2101    0.0062    0.4366
Pt    0.1861    0.7792    0.4156
Pt    0.1882    0.7794    0.4603
Pt    0.0090    0.8497    0.4830
Pt    0.1889    0.8272    0.4165
Pt    0.1875    0.8261    0.4623
Pt    0.1887    0.9616    0.5064
Pt    0.1862    0.8702    0.4615
Pt    0.2334    0.0062    0.4148
Pt    0.1882    0.9154    0.4167
Pt    0.1865    0.9152    0.4621
Pt    0.0772    0.7596    0.5066
Pt    0.1876    0.9607    0.4144
Pt    0.1869    0.9609    0.4615
Pt    0.0320    0.8035    0.4591
Pt    0.2343    0.7803    0.4159
Pt    0.2339    0.7795    0.4605
Pt    0.0303    0.9827    0.4151
Pt    0.2346    0.8274    0.4167
Pt    0.2346    0.8271    0.4627
Pt    0.0314    0.8038    0.4151
Pt    0.2332    0.8696    0.4598
Pt    0.0777    0.0065    0.3960
Pt    0.2354    0.9134    0.4592
Pt    0.0750    0.9386    0.4155
Pt    0.2331    0.9622    0.4139
Pt    0.2332    0.9606    0.4614
Pt    0.0780    0.9386    0.4617
Pt    0.2114    0.8011    0.4164
Pt    0.0317    0.8931    0.4607
Pt    0.1644    0.9842    0.4598
Pt    0.2109    0.9378    0.5068
Pt    0.2106    0.9836    0.4591
Pt    0.2106    0.9847    0.4132
Pt    0.0315    0.8490    0.4596
Pt    0.2112    0.9365    0.4607
Pt    0.2103    0.9374    0.4131
Pt    0.0766    0.8493    0.4598
Pt    0.2105    0.8920    0.4622
Pt    0.0536    0.0066    0.4624
Pt    0.2109    0.8468    0.4623
Pt    0.0747    0.8498    0.4137
Pt    0.2101    0.8032    0.4604
Pt    0.2353    0.0066    0.4611
Pt    0.1617    0.9360    0.4635
Pt    0.1653    0.9381    0.4151
Pt    0.0546    0.8033    0.3930
Pt    0.0537    0.8056    0.4373
Pt    0.0516    0.8040    0.4855
Pt    0.0529    0.8492    0.4350
Pt    0.0546    0.8500    0.4843
Pt    0.0550    0.8951    0.4366
Pt    0.0564    0.8937    0.4860
Pt    0.0533    0.9383    0.3941
Pt    0.0527    0.9376    0.4372
Pt    0.0547    0.9386    0.4851
Pt    0.0545    0.9835    0.3922
Pt    0.0526    0.9851    0.4386
Pt    0.0531    0.9849    0.4837
Pt    0.0552    0.9621    0.5071
Pt    0.1656    0.8034    0.4609
Pt    0.0999    0.8015    0.4382
Pt    0.1002    0.8049    0.4824
Pt    0.0986    0.8510    0.4348
Pt    0.0985    0.9389    0.4388
Pt    0.1017    0.9389    0.4863
Pt    0.1027    0.9866    0.4351
Pt    0.0984    0.9844    0.4838
Pt    0.0286    0.9841    0.4611
Pt    0.1216    0.9840    0.4608
Pt    0.1435    0.8046    0.4373
Pt    0.1427    0.8046    0.4836
Pt    0.1415    0.9373    0.4386
Pt    0.1446    0.9848    0.4849
Pt    0.1200    0.9383    0.4618
Pt    0.2571    0.9834    0.4618
Pt    0.1890    0.8035    0.3955
Pt    0.1869    0.8036    0.4365
Pt    0.1864    0.8031    0.4843
Pt    0.1885    0.8485    0.4389
Pt    0.1861    0.8491    0.4854
Pt    0.1889    0.8946    0.4405
Pt    0.1867    0.8923    0.4831
Pt    0.1872    0.9392    0.3930
Pt    0.1872    0.9388    0.4383
Pt    0.1873    0.9373    0.4844
Pt    0.1872    0.9826    0.3922
Pt    0.1880    0.9816    0.4379
Pt    0.1885    0.9847    0.4831
Pt    0.1209    0.8034    0.4593
Pt    0.0320    0.0059    0.3922
Pt    0.0765    0.9849    0.4608
Pt    0.2356    0.8046    0.3947
Pt    0.2343    0.8045    0.4403
Pt    0.2345    0.8014    0.4844
Pt    0.2343    0.8482    0.4390
Pt    0.2333    0.8490    0.4840
Pt    0.2337    0.8924    0.4834
Pt    0.2334    0.9375    0.3933
Pt    0.2351    0.9370    0.4368
Pt    0.2343    0.9357    0.4827
Pt    0.2349    0.9844    0.3930
Pt    0.2331    0.9821    0.4374
Pt    0.2346    0.9845    0.4830
Pt    0.0322    0.7797    0.3939
Pt    0.0311    0.7788    0.4385
Pt    0.0320    0.7796    0.4827
Pt    0.0306    0.8276    0.4357
Pt    0.0303    0.8259    0.4842
Pt    0.0308    0.8715    0.4367
Pt    0.0320    0.8715    0.4843
Pt    0.0301    0.9150    0.4400
Pt    0.0313    0.9157    0.4842
Pt    0.0301    0.9590    0.3938
Pt    0.0293    0.9613    0.4383
Pt    0.0314    0.9608    0.4832
Pt    0.0772    0.7798    0.4375
Pt    0.0761    0.7805    0.4829
Pt    0.0780    0.8266    0.3929
Pt    0.0762    0.8272    0.4360
Pt    0.0775    0.8260    0.4838
Pt    0.0760    0.8702    0.4362
Pt    0.0786    0.8706    0.4847
Pt    0.0787    0.9155    0.4379
Pt    0.0798    0.9162    0.4839
Pt    0.0779    0.9603    0.3939
Pt    0.0768    0.9613    0.4396
Pt    0.0768    0.9627    0.4836
Pt    0.1224    0.7796    0.4379
Pt    0.1212    0.7814    0.4846
Pt    0.1213    0.8275    0.4358
Pt    0.1206    0.9614    0.4362
Pt    0.1237    0.9624    0.4847
Pt    0.1640    0.7819    0.4379
Pt    0.1653    0.7806    0.4852
Pt    0.1662    0.8272    0.4399
Pt    0.1640    0.8274    0.4858
Pt    0.1642    0.9152    0.4394
Pt    0.1639    0.9583    0.4392
Pt    0.1645    0.9597    0.4830
Pt    0.2076    0.7787    0.3944
Pt    0.2110    0.7793    0.4385
Pt    0.2097    0.7799    0.4837
Pt    0.2111    0.8264    0.3955
Pt    0.2119    0.8264    0.4378
Pt    0.2106    0.8254    0.4839
Pt    0.2091    0.8708    0.4386
Pt    0.2100    0.8702    0.4845
Pt    0.2117    0.9158    0.4374
Pt    0.2103    0.9146    0.4841
Pt    0.2111    0.9595    0.3927
Pt    0.2116    0.9586    0.4387
Pt    0.2113    0.9599    0.4829
Pt    0.0752    0.8050    0.4600
Pt    0.0086    0.9388    0.4857
Pt    0.0314    0.9377    0.4622
Pt    0.0791    0.9824    0.4164
Pt    0.0776    0.8018    0.4145
Pt    0.0791    0.8934    0.4611
Pt    0.0305    0.9375    0.4163
Pt    0.0082    0.9825    0.4856
Pt    0.2563    0.7788    0.4831
Pt    0.0085    0.7800    0.4606
Pt    0.2332    0.8713    0.5073
Pt    0.2344    0.9610    0.5065
Pt    0.2340    0.7790    0.5067
Pt    0.0100    0.8930    0.4847
Pt    0.0074    0.9153    0.4610
Pt    0.0078    0.9837    0.3931
Pt    0.2569    0.8713    0.4847
Pt    0.0763    0.8033    0.5054
Pt    0.1214    0.8058    0.5057
Pt    0.2571    0.7572    0.4172
Pt    0.2570    0.8496    0.4620
Pt    0.2568    0.8912    0.4589
Pt    0.2565    0.9381    0.4614
Pt    0.2570    0.9380    0.5064
Pt    0.0988    0.7822    0.5055
Pt    0.1205    0.7573    0.5063
Pt    0.0558    0.8280    0.5060
Pt    0.0982    0.8279    0.5061
Pt    0.0554    0.9172    0.5060
Pt    0.1428    0.7803    0.5069
Pt    0.1660    0.9828    0.5072
Pt    0.2343    0.0056    0.5073
Pt    0.0079    0.7800    0.5541
Pt    0.0075    0.0060    0.5559
Pt    0.0094    0.8045    0.6219
Pt    0.0765    0.7579    0.5535
Pt    0.1661    0.7571    0.5077
Pt    0.0092    0.8265    0.6002
Pt    0.0075    0.8040    0.5324
Pt    0.2349    0.7579    0.6219
Pt    0.0548    0.7803    0.5534
Pt    0.0547    0.7810    0.6000
Pt    0.0544    0.8270    0.5537
Pt    0.0546    0.8255    0.6010
Pt    0.0562    0.8720    0.5556
Pt    0.0544    0.9156    0.5548
Pt    0.0543    0.9613    0.5554
Pt    0.0545    0.9607    0.6003
Pt    0.0991    0.7798    0.5553
Pt    0.1014    0.8268    0.5529
Pt    0.0997    0.8264    0.5991
Pt    0.0998    0.9615    0.5546
Pt    0.1435    0.7790    0.5528
Pt    0.1429    0.8275    0.5511
Pt    0.1449    0.9606    0.5549
Pt    0.1882    0.7796    0.5547
Pt    0.1872    0.7790    0.6017
Pt    0.1878    0.8273    0.5540
Pt    0.1844    0.8223    0.6003
Pt    0.1869    0.8705    0.5549
Pt    0.1888    0.9166    0.5545
Pt    0.1870    0.9165    0.5966
Pt    0.1878    0.9614    0.5540
Pt    0.1884    0.9577    0.5996
Pt    0.2330    0.7801    0.5550
Pt    0.2334    0.7803    0.5994
Pt    0.2335    0.8282    0.5536
Pt    0.2340    0.8280    0.6000
Pt    0.2351    0.8724    0.5564
Pt    0.2336    0.9143    0.5541
Pt    0.2339    0.9606    0.5527
Pt    0.2337    0.9592    0.5979
Pt    0.1645    0.8044    0.5527
Pt    0.1226    0.9842    0.5553
Pt    0.2113    0.9830    0.5979
Pt    0.2089    0.9835    0.5531
Pt    0.2109    0.9361    0.5992
Pt    0.2113    0.9378    0.5531
Pt    0.2110    0.8934    0.5555
Pt    0.2105    0.8507    0.5546
Pt    0.2103    0.8033    0.5997
Pt    0.2108    0.8051    0.5542
Pt    0.1202    0.9375    0.5560
Pt    0.1218    0.8025    0.5538
Pt    0.1651    0.9834    0.5553
Pt    0.1651    0.9371    0.6012
Pt    0.1654    0.9373    0.5505
Pt    0.0788    0.9839    0.6012
Pt    0.0748    0.9845    0.5544
Pt    0.0773    0.9378    0.6017
Pt    0.0536    0.8036    0.5297
Pt    0.0534    0.8042    0.5761
Pt    0.0552    0.8026    0.6215
Pt    0.0564    0.8512    0.5290
Pt    0.0552    0.8484    0.5787
Pt    0.0561    0.8945    0.5306
Pt    0.0570    0.8931    0.5769
Pt    0.0527    0.9393    0.5310
Pt    0.0542    0.9373    0.5781
Pt    0.0539    0.9367    0.6215
Pt    0.0540    0.9840    0.5315
Pt    0.0557    0.9822    0.5784
Pt    0.0548    0.9836    0.6205
Pt    0.0784    0.9383    0.5538
Pt    0.0801    0.8951    0.5536
Pt    0.0995    0.8055    0.5296
Pt    0.0996    0.8044    0.5770
Pt    0.1004    0.8489    0.5759
Pt    0.1008    0.9383    0.5301
Pt    0.0995    0.9403    0.5792
Pt    0.1004    0.9837    0.5321
Pt    0.1004    0.9832    0.5786
Pt    0.0793    0.8483    0.6013
Pt    0.0777    0.8492    0.5538
Pt    0.1418    0.8055    0.5269
Pt    0.1443    0.8041    0.5757
Pt    0.1445    0.9372    0.5767
Pt    0.1429    0.9843    0.5311
Pt    0.0775    0.8035    0.6000
Pt    0.0767    0.8039    0.5540
Pt    0.1875    0.8028    0.5300
Pt    0.1876    0.8022    0.5764
Pt    0.1883    0.8023    0.6237
Pt    0.1877    0.8489    0.5313
Pt    0.1902    0.8481    0.5799
Pt    0.1876    0.8936    0.5314
Pt    0.1874    0.8923    0.5767
Pt    0.1880    0.9382    0.5284
Pt    0.1867    0.9403    0.5749
Pt    0.1877    0.9369    0.6216
Pt    0.1875    0.9843    0.5300
Pt    0.1879    0.9828    0.5785
Pt    0.1871    0.9803    0.6206
Pt    0.0303    0.9836    0.5990
Pt    0.0321    0.9843    0.5551
Pt    0.0309    0.9367    0.5991
Pt    0.2344    0.8036    0.5312
Pt    0.2347    0.8027    0.5761
Pt    0.2332    0.8041    0.6216
Pt    0.2340    0.8495    0.5307
Pt    0.2338    0.8508    0.5791
Pt    0.2332    0.8940    0.5308
Pt    0.2349    0.9368    0.5295
Pt    0.2345    0.9352    0.5760
Pt    0.2354    0.9357    0.6204
Pt    0.2334    0.9831    0.5303
Pt    0.2348    0.9812    0.5758
Pt    0.2336    0.9828    0.6206
Pt    0.0321    0.7817    0.5305
Pt    0.0310    0.7802    0.5778
Pt    0.0316    0.7800    0.6220
Pt    0.0322    0.8276    0.5313
Pt    0.0305    0.8277    0.5763
Pt    0.0312    0.8724    0.5301
Pt    0.0337    0.8715    0.5794
Pt    0.0318    0.9163    0.5311
Pt    0.0320    0.9130    0.5791
Pt    0.0305    0.9616    0.5323
Pt    0.0305    0.9606    0.5778
Pt    0.0303    0.9590    0.6223
Pt    0.0766    0.7814    0.5306
Pt    0.0756    0.7826    0.5778
Pt    0.0763    0.8260    0.5303
Pt    0.0765    0.8267    0.5775
Pt    0.0768    0.8260    0.6227
Pt    0.0788    0.8733    0.5304
Pt    0.0798    0.8707    0.5779
Pt    0.0775    0.9179    0.5316
Pt    0.0779    0.9179    0.5778
Pt    0.0768    0.9608    0.5305
Pt    0.0785    0.9610    0.5785
Pt    0.0780    0.9609    0.6226
Pt    0.1198    0.7817    0.5296
Pt    0.1211    0.7804    0.5778
Pt    0.1228    0.8270    0.5772
Pt    0.1222    0.9597    0.5312
Pt    0.1223    0.9614    0.5765
Pt    0.1657    0.7823    0.5308
Pt    0.1645    0.7796    0.5778
Pt    0.1655    0.8276    0.5289
Pt    0.1658    0.8274    0.5761
Pt    0.1652    0.9146    0.5752
Pt    0.1659    0.9615    0.5302
Pt    0.1631    0.9616    0.5795
Pt    0.2104    0.7818    0.5313
Pt    0.2094    0.7788    0.5766
Pt    0.2106    0.7799    0.6224
Pt    0.2115    0.8267    0.5309
Pt    0.2117    0.8266    0.5785
Pt    0.2089    0.8287    0.6208
Pt    0.2120    0.8702    0.5309
Pt    0.2110    0.8719    0.5789
Pt    0.2106    0.9141    0.5287
Pt    0.2116    0.9131    0.5789
Pt    0.2109    0.9613    0.5293
Pt    0.2106    0.9605    0.5754
Pt    0.2112    0.9584    0.6213
Pt    0.2330    0.7574    0.5306
Pt    0.0306    0.8490    0.5081
Pt    0.0319    0.9386    0.5080
Pt    0.0793    0.8498    0.5087
Pt    0.0312    0.7574    0.5994
Pt    0.0075    0.7574    0.5762
Pt    0.0772    0.9847    0.5089
Pt    0.0766    0.7583    0.5978
Pt    0.0534    0.7576    0.5757
Pt    0.0555    0.7575    0.6213
Pt    0.0092    0.8502    0.5793
Pt    0.0325    0.8945    0.5083
Pt    0.0313    0.9380    0.5542
Pt    0.0327    0.8935    0.5543
Pt    0.0311    0.8048    0.5532
Pt    0.0303    0.8034    0.5993
Pt    0.0298    0.8502    0.5550
Pt    0.0310    0.7597    0.5547
Pt    0.0985    0.7586    0.5305
Pt    0.0075    0.9158    0.5545
Pt    0.0088    0.9367    0.5769
Pt    0.0088    0.8925    0.5776
Pt    0.1893    0.7574    0.5310
Pt    0.0084    0.8945    0.5310
Pt    0.0085    0.8033    0.5764
Pt    0.0084    0.7575    0.6218
Pt    0.0314    0.0063    0.5782
Pt    0.2561    0.8726    0.5309
Pt    0.0533    0.7580    0.5301
Pt    0.0084    0.8720    0.5074
Pt    0.1885    0.8263    0.5077
Pt    0.0994    0.0054    0.5554
Pt    0.0549    0.8714    0.5077
Pt    0.0985    0.9620    0.5085
Pt    0.0275    0.0062    0.5309
Pt    0.2553    0.7802    0.5324
Pt    0.2342    0.8262    0.5095
Pt    0.0780    0.0062    0.5787
Pt    0.2342    0.0061    0.5976
Pt    0.0319    0.0056    0.6205
Pt    0.2573    0.9821    0.5992
Pt    0.2553    0.7809    0.6224
Pt    0.1868    0.0064    0.5547
Pt    0.2102    0.0064    0.6190
Pt    0.2556    0.8045    0.5983
Pt    0.0088    0.8735    0.5537
Pt    0.0086    0.8495    0.5315
Pt    0.1657    0.8047    0.5073
Pt    0.2119    0.0057    0.5756
Pt    0.1868    0.0050    0.5991
Pt    0.2562    0.9613    0.5293
Pt    0.2566    0.8038    0.5547
Pt    0.0087    0.7573    0.5305
Pt    0.2338    0.0054    0.5529
Pt    0.1652    0.0071    0.5313
Pt    0.2561    0.8489    0.5089
Pt    0.2572    0.0060    0.6220
Pt    0.1428    0.9599    0.5086
Pt    0.2570    0.8285    0.6205
Pt    0.0557    0.0066    0.6003
Pt    0.1653    0.0064    0.5776
Pt    0.0308    0.9841    0.5084
Pt    0.2099    0.0056    0.5299
Pt    0.2111    0.8039    0.5076
Pt    0.0778    0.9376    0.5084
Pt    0.2087    0.8918    0.5079
Pt    0.0082    0.9607    0.5097
Pt    0.1208    0.9842    0.5076
Pt    0.1852    0.9132    0.5076
Pt    0.1861    0.8714    0.5079
Pt    0.0798    0.8940    0.5075
Pt    0.0289    0.8027    0.5080
Pt    0.0081    0.9167    0.5085
Pt    0.0523    0.7820    0.5075
Pt    0.1881    0.7802    0.5079
Pt    0.2104    0.8487    0.5076
Pt    0.0096    0.9394    0.7108
Pt    0.1652    0.7577    0.6887
Pt    0.0316    0.9153    0.7570
Pt    0.0084    0.9620    0.6876
Pt    0.0102    0.9380    0.6645
Pt    0.0534    0.7576    0.7135
Pt    0.0097    0.8489    0.7091
Pt    0.1437    0.9355    0.7562
Pt    0.1875    0.7585    0.7115
Pt    0.0074    0.8058    0.6632
Pt    0.0980    0.9383    0.7563
Pt    0.1659    0.7576    0.7342
Pt    0.0573    0.7802    0.6428
Pt    0.0529    0.7794    0.6864
Pt    0.0520    0.7807    0.7336
Pt    0.0548    0.8278    0.6435
Pt    0.0528    0.8269    0.6858
Pt    0.0521    0.8246    0.7330
Pt    0.0532    0.8716    0.6863
Pt    0.0568    0.8731    0.7341
Pt    0.0527    0.9147    0.6881
Pt    0.0552    0.9144    0.7344
Pt    0.0527    0.9613    0.6435
Pt    0.0530    0.9599    0.6888
Pt    0.0542    0.9598    0.7358
Pt    0.1008    0.7803    0.6855
Pt    0.0988    0.7808    0.7332
Pt    0.1007    0.8290    0.6875
Pt    0.1003    0.8290    0.7372
Pt    0.1003    0.9155    0.6876
Pt    0.0999    0.9633    0.6855
Pt    0.0991    0.9613    0.7336
Pt    0.1421    0.7787    0.6866
Pt    0.1441    0.7817    0.7338
Pt    0.1426    0.8273    0.6878
Pt    0.1426    0.8278    0.7337
Pt    0.1452    0.9609    0.6873
Pt    0.1435    0.9586    0.7328
Pt    0.1872    0.7804    0.6884
Pt    0.1877    0.7796    0.7345
Pt    0.1884    0.8279    0.6437
Pt    0.1885    0.8257    0.6875
Pt    0.1887    0.8255    0.7336
Pt    0.1893    0.8709    0.6874
Pt    0.1872    0.9143    0.6902
Pt    0.1868    0.9139    0.7355
Pt    0.1886    0.9585    0.6441
Pt    0.1882    0.9597    0.6884
Pt    0.1868    0.9602    0.7348
Pt    0.2326    0.7805    0.6448
Pt    0.2331    0.7799    0.6864
Pt    0.2340    0.7793    0.7343
Pt    0.2341    0.8270    0.6436
Pt    0.2347    0.8270    0.6888
Pt    0.2342    0.8263    0.7332
Pt    0.2344    0.8705    0.7340
Pt    0.2362    0.9152    0.6861
Pt    0.2362    0.9147    0.7345
Pt    0.2336    0.9597    0.6431
Pt    0.2344    0.9607    0.6875
Pt    0.2326    0.9597    0.7347
Pt    0.2108    0.8940    0.6882
Pt    0.2107    0.8496    0.7329
Pt    0.2121    0.8487    0.6878
Pt    0.2106    0.9825    0.7342
Pt    0.2082    0.9823    0.6875
Pt    0.2107    0.9835    0.6436
Pt    0.2096    0.9374    0.7338
Pt    0.2112    0.9352    0.6872
Pt    0.2109    0.9365    0.6435
Pt    0.2095    0.8936    0.7345
Pt    0.2122    0.8030    0.7324
Pt    0.2113    0.8030    0.6891
Pt    0.0544    0.8036    0.6651
Pt    0.0557    0.8037    0.7079
Pt    0.0534    0.8489    0.7117
Pt    0.0530    0.8910    0.7102
Pt    0.0510    0.9354    0.6640
Pt    0.0547    0.9374    0.7127
Pt    0.0531    0.9852    0.6633
Pt    0.0545    0.9829    0.7120
Pt    0.2114    0.8045    0.6433
Pt    0.1003    0.8040    0.7111
Pt    0.0969    0.9380    0.6664
Pt    0.0983    0.9373    0.7113
Pt    0.0991    0.9833    0.7088
Pt    0.1634    0.9820    0.7328
Pt    0.1427    0.8046    0.7081
Pt    0.1424    0.9349    0.7093
Pt    0.1419    0.9844    0.7092
Pt    0.1664    0.9823    0.6887
Pt    0.1640    0.9340    0.7334
Pt    0.1873    0.8022    0.6644
Pt    0.1891    0.8029    0.7108
Pt    0.1873    0.8481    0.6657
Pt    0.1883    0.8481    0.7116
Pt    0.1872    0.8922    0.7118
Pt    0.1881    0.9365    0.6660
Pt    0.1875    0.9371    0.7128
Pt    0.1867    0.9827    0.6642
Pt    0.1872    0.9835    0.7114
Pt    0.1666    0.9373    0.6887
Pt    0.1658    0.8484    0.6886
Pt    0.2340    0.8046    0.6667
Pt    0.2354    0.8022    0.7111
Pt    0.2343    0.8492    0.7108
Pt    0.2353    0.8940    0.7098
Pt    0.2343    0.9363    0.6650
Pt    0.2337    0.9371    0.7100
Pt    0.2341    0.9823    0.6653
Pt    0.2346    0.9820    0.7108
Pt    0.0313    0.7794    0.6634
Pt    0.0298    0.7794    0.7093
Pt    0.0311    0.8269    0.6638
Pt    0.0316    0.8262    0.7098
Pt    0.0301    0.8713    0.7098
Pt    0.0302    0.9154    0.7126
Pt    0.0317    0.9614    0.6656
Pt    0.0327    0.9607    0.7133
Pt    0.0778    0.7787    0.6656
Pt    0.0767    0.7810    0.7106
Pt    0.0779    0.8265    0.6666
Pt    0.0784    0.8258    0.7096
Pt    0.0784    0.8720    0.7108
Pt    0.0741    0.9149    0.6666
Pt    0.0782    0.9129    0.7128
Pt    0.0756    0.9614    0.6659
Pt    0.0770    0.9604    0.7100
Pt    0.1215    0.7807    0.7102
Pt    0.1205    0.8269    0.7100
Pt    0.1214    0.9589    0.7102
Pt    0.1653    0.7815    0.7102
Pt    0.1652    0.8248    0.6646
Pt    0.1647    0.8264    0.7113
Pt    0.1648    0.9592    0.7109
Pt    0.2090    0.7802    0.6659
Pt    0.2109    0.7785    0.7114
Pt    0.2123    0.8273    0.6654
Pt    0.2116    0.8259    0.7116
Pt    0.2114    0.8719    0.7104
Pt    0.2112    0.9142    0.7114
Pt    0.2106    0.9591    0.6661
Pt    0.2110    0.9605    0.7093
Pt    0.2086    0.7582    0.6444
Pt    0.2343    0.7571    0.6660
Pt    0.1663    0.0071    0.7557
Pt    0.2104    0.7574    0.6881
Pt    0.0318    0.8277    0.7572
Pt    0.0762    0.7576    0.6887
Pt    0.1210    0.0057    0.7096
Pt    0.0082    0.8030    0.7107
Pt    0.1643    0.8046    0.7338
Pt    0.1652    0.8028    0.6862
Pt    0.1207    0.9830    0.7328
Pt    0.0325    0.8049    0.6434
Pt    0.0309    0.8034    0.6865
Pt    0.0301    0.8032    0.7341
Pt    0.0301    0.8501    0.6840
Pt    0.0312    0.8489    0.7334
Pt    0.0312    0.8941    0.6874
Pt    0.0315    0.8919    0.7354
Pt    0.0311    0.9377    0.6882
Pt    0.0301    0.9388    0.7356
Pt    0.0296    0.9835    0.6436
Pt    0.0318    0.9845    0.6889
Pt    0.0306    0.9835    0.7358
Pt    0.1199    0.9365    0.7318
Pt    0.1209    0.9385    0.6871
Pt    0.0789    0.8028    0.6446
Pt    0.0793    0.8032    0.6865
Pt    0.0767    0.8037    0.7333
Pt    0.0741    0.8486    0.6896
Pt    0.0772    0.8484    0.7334
Pt    0.0765    0.8931    0.6884
Pt    0.0753    0.9376    0.6444
Pt    0.0760    0.9373    0.6872
Pt    0.0773    0.9378    0.7342
Pt    0.0779    0.9843    0.6443
Pt    0.0769    0.9847    0.6872
Pt    0.0778    0.9847    0.7340
Pt    0.1212    0.8041    0.7338
Pt    0.1214    0.8038    0.6852
Pt    0.2111    0.8716    0.7567
Pt    0.1879    0.8493    0.7556
Pt    0.0086    0.8267    0.6867
Pt    0.1207    0.7573    0.7344
Pt    0.1880    0.0055    0.6418
Pt    0.1219    0.7807    0.7551
Pt    0.0082    0.9586    0.6428
Pt    0.0764    0.9155    0.7570
Pt    0.0081    0.8715    0.6871
Pt    0.0083    0.9176    0.6881
Pt    0.2338    0.9842    0.7565
Pt    0.2348    0.7572    0.7105
Pt    0.0081    0.9600    0.7345
Pt    0.1875    0.8025    0.7569
Pt    0.2115    0.7574    0.7339
Pt    0.0079    0.9834    0.7115
Pt    0.0530    0.0064    0.6878
Pt    0.0075    0.0069    0.7346
Pt    0.2568    0.8714    0.7085
Pt    0.0306    0.8711    0.7563
Pt    0.0076    0.0062    0.6876
Pt    0.1891    0.0067    0.7338
Pt    0.0995    0.0063    0.6860
Pt    0.0998    0.0068    0.7333
Pt    0.0080    0.9843    0.6667
Pt    0.1218    0.9601    0.7557
Pt    0.2332    0.0057    0.6437
Pt    0.2339    0.0043    0.6876
Pt    0.2101    0.0054    0.6652
Pt    0.0316    0.0069    0.6649
Pt    0.0769    0.0061    0.7097
Pt    0.1866    0.0059    0.6874
Pt    0.0555    0.0069    0.7327
Pt    0.0080    0.0067    0.6420
Pt    0.2107    0.0045    0.7103
Pt    0.2103    0.7790    0.7571
Pt    0.2339    0.0062    0.7342
Pt    0.2557    0.8041    0.6864
Pt    0.2565    0.9827    0.7329
Pt    0.1434    0.0055    0.7338
Pt    0.2108    0.9145    0.7573
Pt    0.2568    0.9607    0.7108
Pt    0.2359    0.7581    0.7570
Pt    0.0295    0.7802    0.7557
Pt    0.0309    0.0063    0.7119
Pt    0.2570    0.8495    0.6867
Pt    0.2570    0.9588    0.6642
Pt    0.2554    0.8047    0.6438
Pt    0.2572    0.8034    0.7338
Pt    0.1443    0.8042    0.7572
Pt    0.2340    0.8490    0.7547
Pt    0.2103    0.8250    0.7552
Pt    0.0528    0.8037    0.7566
Pt    0.2564    0.9614    0.7570
Pt    0.0763    0.9612    0.7569
Pt    0.2572    0.8275    0.7108
Pt    0.1868    0.9376    0.7558
Pt    0.0763    0.7819    0.7570
Pt    0.0086    0.8023    0.7550
Pt    0.0538    0.9843    0.7565
Pt    0.2570    0.8710    0.7565
Pt    0.2571    0.0063    0.7556
Pt    0.0075    0.9611    0.7813
Pt    0.0076    0.9367    0.8039
Pt    0.0073    0.8268    0.7783
Pt    0.0084    0.9160    0.8267
Pt    0.0766    0.9377    0.8258
Pt    0.0301    0.7575    0.8717
Pt    0.0768    0.9371    0.7790
Pt    0.2108    0.9590    0.8499
Pt    0.1645    0.7799    0.7578
Pt    0.2092    0.9607    0.8044
Pt    0.0530    0.7586    0.8050
Pt    0.0769    0.8918    0.8284
Pt    0.0519    0.7801    0.7814
Pt    0.0546    0.7808    0.8262
Pt    0.0541    0.7807    0.8716
Pt    0.0528    0.8273    0.7793
Pt    0.0536    0.8272    0.8283
Pt    0.0524    0.8268    0.8718
Pt    0.0545    0.8703    0.7832
Pt    0.0538    0.8703    0.8285
Pt    0.0549    0.9149    0.7813
Pt    0.0543    0.9159    0.8260
Pt    0.0537    0.9611    0.7805
Pt    0.0528    0.9597    0.8267
Pt    0.0540    0.9604    0.8709
Pt    0.0976    0.7821    0.7816
Pt    0.0997    0.7823    0.8270
Pt    0.0980    0.8262    0.7818
Pt    0.0994    0.8256    0.8308
Pt    0.0981    0.9148    0.8251
Pt    0.0999    0.9609    0.7801
Pt    0.0995    0.9625    0.8280
Pt    0.1430    0.7825    0.7810
Pt    0.1454    0.7816    0.8275
Pt    0.1447    0.8272    0.7812
Pt    0.1429    0.8275    0.8270
Pt    0.1441    0.9598    0.7808
Pt    0.1433    0.9618    0.8263
Pt    0.1895    0.7795    0.7802
Pt    0.1871    0.7809    0.8253
Pt    0.1892    0.8276    0.7788
Pt    0.1890    0.8274    0.8267
Pt    0.1886    0.8266    0.8712
Pt    0.1877    0.8710    0.8276
Pt    0.1881    0.9150    0.7794
Pt    0.1867    0.9154    0.8252
Pt    0.1879    0.9605    0.7816
Pt    0.1872    0.9604    0.8274
Pt    0.1865    0.9595    0.8720
Pt    0.2345    0.7812    0.7799
Pt    0.2345    0.7804    0.8254
Pt    0.2322    0.7799    0.8711
Pt    0.2331    0.8279    0.7806
Pt    0.2357    0.8267    0.8260
Pt    0.2323    0.8294    0.8706
Pt    0.2344    0.8713    0.7803
Pt    0.2336    0.9142    0.7816
Pt    0.2349    0.9146    0.8276
Pt    0.2338    0.9598    0.7808
Pt    0.2334    0.9605    0.8273
Pt    0.2352    0.9597    0.8714
Pt    0.1647    0.9859    0.8278
Pt    0.1655    0.9844    0.7802
Pt    0.1654    0.9371    0.8254
Pt    0.2091    0.9833    0.8707
Pt    0.2113    0.9833    0.8267
Pt    0.2121    0.9839    0.7808
Pt    0.2120    0.9346    0.8702
Pt    0.2117    0.9369    0.8283
Pt    0.2092    0.9372    0.7810
Pt    0.2097    0.8935    0.8258
Pt    0.2101    0.8925    0.7811
Pt    0.2148    0.8491    0.8274
Pt    0.2108    0.8500    0.7784
Pt    0.2107    0.8036    0.8711
Pt    0.2119    0.8033    0.8244
Pt    0.2106    0.8041    0.7785
Pt    0.1652    0.9367    0.7796
Pt    0.1668    0.8489    0.8269
Pt    0.1654    0.8053    0.8278
Pt    0.2117    0.7580    0.8254
Pt    0.0533    0.8045    0.8061
Pt    0.0543    0.8026    0.8494
Pt    0.0085    0.7817    0.7797
Pt    0.0539    0.8490    0.8061
Pt    0.1656    0.7583    0.8280
Pt    0.0544    0.8923    0.8056
Pt    0.1654    0.7587    0.7821
Pt    0.0541    0.9385    0.8029
Pt    0.0520    0.9363    0.8498
Pt    0.2113    0.9605    0.7582
Pt    0.0545    0.9829    0.8025
Pt    0.0541    0.9834    0.8466
Pt    0.1664    0.8042    0.7806
Pt    0.1216    0.9830    0.7812
Pt    0.0080    0.9604    0.8709
Pt    0.0980    0.8037    0.8043
Pt    0.2347    0.7579    0.8476
Pt    0.1003    0.9365    0.8009
Pt    0.0995    0.9384    0.8491
Pt    0.1877    0.7588    0.8490
Pt    0.0998    0.9833    0.8034
Pt    0.1196    0.9388    0.8259
Pt    0.1218    0.9371    0.7783
Pt    0.0521    0.7588    0.7575
Pt    0.1431    0.8035    0.8036
Pt    0.2130    0.7586    0.7803
Pt    0.1431    0.9365    0.8037
Pt    0.1653    0.0057    0.8030
Pt    0.1432    0.9831    0.8046
Pt    0.1230    0.8030    0.8277
Pt    0.1201    0.8060    0.7813
Pt    0.0785    0.9828    0.8703
Pt    0.0075    0.8046    0.8035
Pt    0.1874    0.8042    0.8030
Pt    0.1857    0.8034    0.8508
Pt    0.0079    0.9836    0.8042
Pt    0.1883    0.8504    0.8029
Pt    0.1912    0.8487    0.8481
Pt    0.1859    0.8934    0.8035
Pt    0.0076    0.7571    0.8041
Pt    0.1870    0.9378    0.8036
Pt    0.1859    0.9386    0.8496
Pt    0.1216    0.7584    0.8268
Pt    0.1882    0.9835    0.8048
Pt    0.1857    0.9845    0.8495
Pt    0.0758    0.9826    0.8261
Pt    0.0763    0.9835    0.7800
Pt    0.0762    0.9394    0.8708
Pt    0.0985    0.0063    0.8274
Pt    0.2343    0.8048    0.8023
Pt    0.2347    0.8036    0.8494
Pt    0.2105    0.0068    0.8043
Pt    0.2364    0.8502    0.8036
Pt    0.2347    0.0070    0.7814
Pt    0.2348    0.8913    0.8046
Pt    0.0076    0.7809    0.8265
Pt    0.2334    0.9378    0.8036
Pt    0.2358    0.9358    0.8501
Pt    0.2338    0.8926    0.7577
Pt    0.2341    0.9823    0.8023
Pt    0.2336    0.9846    0.8497
Pt    0.0553    0.8917    0.7592
Pt    0.0302    0.7798    0.8038
Pt    0.0320    0.7801    0.8495
Pt    0.0773    0.0068    0.7578
Pt    0.0301    0.8260    0.8040
Pt    0.0293    0.8258    0.8465
Pt    0.0766    0.8018    0.8737
Pt    0.0302    0.8709    0.8033
Pt    0.0770    0.8046    0.8285
Pt    0.0295    0.9151    0.8032
Pt    0.0740    0.8046    0.7808
Pt    0.0304    0.9614    0.8025
Pt    0.0310    0.9600    0.8479
Pt    0.0777    0.8492    0.7814
Pt    0.0759    0.7798    0.8039
Pt    0.0782    0.7793    0.8500
Pt    0.0783    0.8492    0.8298
Pt    0.0769    0.8270    0.8051
Pt    0.0752    0.8257    0.8512
Pt    0.0778    0.8693    0.8056
Pt    0.0317    0.9836    0.8689
Pt    0.0766    0.9141    0.8016
Pt    0.0766    0.9155    0.8496
Pt    0.0308    0.9838    0.8245
Pt    0.0779    0.9598    0.8040
Pt    0.0773    0.9607    0.8480
Pt    0.0294    0.9842    0.7799
Pt    0.1213    0.7799    0.8042
Pt    0.0312    0.9377    0.8260
Pt    0.1184    0.8269    0.8056
Pt    0.0300    0.9380    0.7804
Pt    0.1213    0.9600    0.8040
Pt    0.0299    0.8947    0.8279
Pt    0.1664    0.7819    0.8034
Pt    0.0314    0.8927    0.7805
Pt    0.1660    0.8283    0.8039
Pt    0.1655    0.8261    0.8495
Pt    0.0297    0.8501    0.8272
Pt    0.1647    0.9594    0.8048
Pt    0.0305    0.8499    0.7785
Pt    0.2108    0.7816    0.8027
Pt    0.2101    0.7798    0.8483
Pt    0.0298    0.8039    0.8718
Pt    0.2108    0.8261    0.8023
Pt    0.2126    0.8262    0.8487
Pt    0.0298    0.8022    0.8264
Pt    0.2104    0.8716    0.8031
Pt    0.0304    0.8044    0.7797
Pt    0.2109    0.9149    0.8041
Pt    0.1865    0.0065    0.8270
Pt    0.1230    0.8268    0.7582
Pt    0.2330    0.9365    0.7575
Pt    0.1425    0.0069    0.7813
Pt    0.2094    0.0059    0.8488
Pt    0.2079    0.7581    0.8724
Pt    0.0074    0.7801    0.8712
Pt    0.1435    0.7572    0.8034
Pt    0.0543    0.0058    0.7798
Pt    0.2324    0.0069    0.8717
Pt    0.0295    0.0064    0.8460
Pt    0.2569    0.8040    0.7789
Pt    0.1225    0.0069    0.8059
Pt    0.2571    0.9146    0.7597
Pt    0.2568    0.7825    0.8023
Pt    0.0555    0.0070    0.8252
Pt    0.2567    0.9827    0.8252
Pt    0.0305    0.7571    0.8285
Pt    0.2572    0.9388    0.8270
Pt    0.2557    0.9164    0.8051
Pt    0.2555    0.9835    0.8714
Pt    0.2571    0.9375    0.7809
Pt    0.2327    0.0062    0.8252
Pt    0.0762    0.0070    0.8490
Pt    0.0990    0.7587    0.7580
Pt    0.0541    0.9382    0.7586
Pt    0.0767    0.8265    0.7578
Pt    0.0552    0.8519    0.7576
Pt    0.0292    0.9617    0.7580
Pt    0.0994    0.9834    0.7576
Pt    0.1421    0.9840    0.7580
Pt    0.1649    0.9620    0.7575
Pt    0.0991    0.8047    0.7577
Pt    0.1889    0.9835    0.7581
Pt    0.1642    0.8289    0.7576
Pt    0.0764    0.7571    0.7812
Pt    0.2337    0.8044    0.7574
Pt    0.1437    0.7799    0.0070
Pt    0.0781    0.8944    0.0053
Pt    0.0081    0.9837    0.9382
Pt    0.0531    0.7572    0.9385
Pt    0.0749    0.8042    0.0069
Pt    0.2115    0.7593    0.9154
Pt    0.1424    0.9595    0.0050
Pt    0.2329    0.9141    0.0064
Pt    0.0535    0.7797    0.9144
Pt    0.0533    0.7799    0.9606
Pt    0.0529    0.8284    0.9143
Pt    0.0529    0.8267    0.9605
Pt    0.0537    0.8721    0.9610
Pt    0.0532    0.9140    0.9620
Pt    0.0536    0.9612    0.9162
Pt    0.0529    0.9628    0.9620
Pt    0.0982    0.7807    0.9594
Pt    0.0996    0.8245    0.9151
Pt    0.0983    0.8270    0.9611
Pt    0.0992    0.9624    0.9607
Pt    0.1435    0.7819    0.9602
Pt    0.1442    0.8278    0.9605
Pt    0.1444    0.9590    0.9612
Pt    0.1873    0.7792    0.9126
Pt    0.1871    0.7802    0.9598
Pt    0.1904    0.8284    0.9161
Pt    0.1872    0.8262    0.9613
Pt    0.1883    0.8706    0.9635
Pt    0.1904    0.9165    0.9164
Pt    0.1891    0.9153    0.9598
Pt    0.1900    0.9602    0.9137
Pt    0.1879    0.9604    0.9616
Pt    0.2351    0.7818    0.9146
Pt    0.2327    0.7807    0.9583
Pt    0.2331    0.8293    0.9146
Pt    0.2346    0.8256    0.9601
Pt    0.2344    0.8713    0.9585
Pt    0.2339    0.9147    0.9624
Pt    0.2341    0.9608    0.9165
Pt    0.2339    0.9616    0.9611
Pt    0.1651    0.8035    0.9611
Pt    0.1206    0.9849    0.9575
Pt    0.2101    0.9840    0.9605
Pt    0.2107    0.9852    0.9163
Pt    0.2113    0.9371    0.9608
Pt    0.2133    0.9376    0.9157
Pt    0.2102    0.8919    0.9630
Pt    0.2121    0.8488    0.9620
Pt    0.2092    0.8031    0.9606
Pt    0.2118    0.8048    0.9147
Pt    0.1222    0.9387    0.9591
Pt    0.1195    0.8041    0.9611
Pt    0.1639    0.9859    0.9588
Pt    0.1666    0.9376    0.9595
Pt    0.1678    0.9390    0.9157
Pt    0.0755    0.9841    0.9600
Pt    0.0782    0.9851    0.9126
Pt    0.0757    0.9401    0.9595
Pt    0.0533    0.8050    0.8938
Pt    0.0531    0.8038    0.9377
Pt    0.0545    0.8042    0.9834
Pt    0.0513    0.8497    0.9374
Pt    0.0529    0.8496    0.9840
Pt    0.0542    0.8931    0.9375
Pt    0.0539    0.8929    0.9853
Pt    0.0526    0.9374    0.8939
Pt    0.0520    0.9365    0.9371
Pt    0.0535    0.9386    0.9839
Pt    0.0549    0.9828    0.8922
Pt    0.0536    0.9837    0.9357
Pt    0.0532    0.9861    0.9843
Pt    0.0761    0.9381    0.9171
Pt    0.0788    0.8935    0.9600
Pt    0.0979    0.8036    0.9381
Pt    0.0987    0.8029    0.9842
Pt    0.0971    0.8475    0.9372
Pt    0.0983    0.9383    0.9395
Pt    0.0998    0.9371    0.9830
Pt    0.0984    0.9832    0.9358
Pt    0.0986    0.9845    0.9830
Pt    0.0750    0.8480    0.9605
Pt    0.0750    0.8499    0.9145
Pt    0.1422    0.8050    0.9363
Pt    0.1418    0.8050    0.9838
Pt    0.1463    0.9390    0.9371
Pt    0.1433    0.9847    0.9826
Pt    0.0755    0.8049    0.9608
Pt    0.0757    0.8017    0.9139
Pt    0.1879    0.8051    0.8947
Pt    0.1865    0.8047    0.9378
Pt    0.1876    0.8026    0.9845
Pt    0.1865    0.8494    0.9414
Pt    0.1877    0.8462    0.9843
Pt    0.1899    0.8916    0.9367
Pt    0.1864    0.8946    0.9845
Pt    0.1901    0.9360    0.8919
Pt    0.1904    0.9383    0.9381
Pt    0.1873    0.9365    0.9832
Pt    0.1862    0.9832    0.8931
Pt    0.1889    0.9858    0.9380
Pt    0.1884    0.9842    0.9830
Pt    0.0301    0.9848    0.9616
Pt    0.0320    0.9836    0.9154
Pt    0.0305    0.9393    0.9613
Pt    0.2344    0.8058    0.8935
Pt    0.2322    0.8046    0.9380
Pt    0.2341    0.8030    0.9821
Pt    0.2341    0.8485    0.9375
Pt    0.2335    0.8494    0.9839
Pt    0.2339    0.8919    0.9841
Pt    0.2326    0.9362    0.8924
Pt    0.2340    0.9377    0.9389
Pt    0.2348    0.9382    0.9850
Pt    0.2326    0.9835    0.8943
Pt    0.2356    0.9837    0.9387
Pt    0.2359    0.9829    0.9840
Pt    0.0298    0.7809    0.8929
Pt    0.0297    0.7807    0.9371
Pt    0.0298    0.7813    0.9845
Pt    0.0297    0.8264    0.9390
Pt    0.0303    0.8266    0.9835
Pt    0.0292    0.8718    0.9359
Pt    0.0292    0.8718    0.9843
Pt    0.0293    0.9154    0.9382
Pt    0.0311    0.9151    0.9843
Pt    0.0310    0.9611    0.8925
Pt    0.0306    0.9608    0.9397
Pt    0.0301    0.9621    0.9841
Pt    0.0748    0.7795    0.9384
Pt    0.0763    0.7799    0.9836
Pt    0.0767    0.8268    0.8931
Pt    0.0761    0.8256    0.9354
Pt    0.0764    0.8264    0.9847
Pt    0.0754    0.8718    0.9382
Pt    0.0778    0.8713    0.9827
Pt    0.0762    0.9154    0.9388
Pt    0.0784    0.9154    0.9811
Pt    0.0763    0.9599    0.8937
Pt    0.0767    0.9614    0.9366
Pt    0.0778    0.9614    0.9831
Pt    0.1204    0.7824    0.9363
Pt    0.1227    0.7798    0.9845
Pt    0.1207    0.8264    0.9372
Pt    0.1228    0.9602    0.9368
Pt    0.1211    0.9602    0.9826
Pt    0.1653    0.7825    0.9355
Pt    0.1647    0.7788    0.9834
Pt    0.1646    0.8257    0.9387
Pt    0.1634    0.8260    0.9849
Pt    0.1664    0.9148    0.9373
Pt    0.1667    0.9620    0.9375
Pt    0.1655    0.9611    0.9829
Pt    0.2112    0.7809    0.8934
Pt    0.2094    0.7826    0.9368
Pt    0.2110    0.7813    0.9825
Pt    0.2111    0.8276    0.8932
Pt    0.2105    0.8282    0.9392
Pt    0.2114    0.8249    0.9842
Pt    0.2106    0.8691    0.9361
Pt    0.2092    0.8700    0.9864
Pt    0.2128    0.9118    0.9361
Pt    0.2096    0.9148    0.9842
Pt    0.2114    0.9596    0.8923
Pt    0.2107    0.9622    0.9377
Pt    0.2115    0.9608    0.9833
Pt    0.2570    0.8924    0.0055
Pt    0.2343    0.7579    0.9829
Pt    0.0081    0.9840    0.8923
Pt    0.1430    0.7592    0.9368
Pt    0.0784    0.9372    0.0059
Pt    0.0307    0.8494    0.0071
Pt    0.2346    0.9614    0.0069
Pt    0.2569    0.8282    0.9838
Pt    0.1224    0.8054    0.0061
Pt    0.0091    0.9610    0.9151
Pt    0.0074    0.8275    0.9609
Pt    0.0097    0.8078    0.8949
Pt    0.0294    0.9371    0.9143
Pt    0.0294    0.8923    0.9606
Pt    0.0301    0.8055    0.9167
Pt    0.0292    0.8024    0.9611
Pt    0.0296    0.8499    0.9609
Pt    0.0295    0.8046    0.0057
Pt    0.0558    0.9168    0.0065
Pt    0.1213    0.7580    0.9610
Pt    0.0992    0.7802    0.0067
Pt    0.0076    0.8943    0.9832
Pt    0.0303    0.7589    0.9161
Pt    0.1875    0.9591    0.0062
Pt    0.1898    0.7572    0.9838
Pt    0.0986    0.7577    0.9836
Pt    0.2352    0.7803    0.0060
Pt    0.0075    0.7804    0.9612
Pt    0.0077    0.9610    0.9598
Pt    0.0084    0.9395    0.9842
Pt    0.2567    0.0068    0.9387
Pt    0.2547    0.9368    0.9148
Pt    0.1899    0.7579    0.9378
Pt    0.2571    0.8032    0.0066
Pt    0.2338    0.7577    0.9379
Pt    0.0312    0.9385    0.0064
Pt    0.0301    0.7572    0.9607
Pt    0.0534    0.7580    0.9844
Pt    0.2569    0.7810    0.9826
Pt    0.0987    0.7576    0.9378
Pt    0.2110    0.7584    0.9600
Pt    0.2570    0.9611    0.8941
Pt    0.2573    0.8047    0.9176
Pt    0.1212    0.9840    0.0054
Pt    0.2548    0.9142    0.9388
Pt    0.2553    0.8491    0.0070
Pt    0.2564    0.9385    0.9602
Pt    0.1660    0.9373    0.0061
Pt    0.2562    0.7825    0.8924
Pt    0.2571    0.9154    0.9851
Pt    0.0998    0.9602    0.0067
Pt    0.2105    0.9376    0.0062
Pt    0.1849    0.0063    0.9145
Pt    0.0758    0.0070    0.9855
Pt    0.2120    0.0061    0.9849
Pt    0.0990    0.0065    0.9606
Pt    0.0759    0.0061    0.8920
Pt    0.0548    0.0061    0.9137
Pt    0.2338    0.0066    0.9605
Pt    0.1896    0.0068    0.0067
Pt    0.2134    0.7587    0.0070
Pt    0.0549    0.7584    0.8929
Pt    0.0090    0.7577    0.9831
Pt    0.0802    0.8485    0.0050
Pt    0.1665    0.9838    0.0052
Pt    0.0769    0.9844    0.0059
Pt    0.2094    0.0071    0.8940
Pt    0.2094    0.8474    0.0062
Pt    0.0548    0.9613    0.0057
Pt    0.0520    0.8261    0.0069
Pt    0.2125    0.9842    0.0051
Pt    0.0557    0.8706    0.0057
Pt    0.0318    0.8932    0.0073
Pt    0.2591    0.0998    0.0789
Pt    0.2586    0.0761    0.0516
Pt    0.4383    0.0760    0.0512
Pt    0.4384    0.0314    0.0994
Pt    0.2813    0.0529    0.0536
Pt    0.2797    0.0531    0.1002
Pt    0.4369    0.0297    0.0535
Pt    0.2812    0.0992    0.0543
Pt    0.2578    0.0306    0.0542
Pt    0.2819    0.1441    0.0557
Pt    0.3950    0.2103    0.0515
Pt    0.2817    0.1886    0.0547
Pt    0.2821    0.1877    0.1002
Pt    0.3938    0.0779    0.0518
Pt    0.2818    0.2351    0.0541
Pt    0.2802    0.2350    0.0980
Pt    0.4849    0.2121    0.0991
Pt    0.4830    0.2108    0.0540
Pt    0.3926    0.0295    0.0546
Pt    0.2575    0.0536    0.0752
Pt    0.3253    0.0524    0.0547
Pt    0.3279    0.0514    0.0983
Pt    0.3494    0.2096    0.0523
Pt    0.3273    0.0982    0.0556
Pt    0.3271    0.0950    0.1007
Pt    0.3504    0.0743    0.0992
Pt    0.3301    0.1451    0.0565
Pt    0.3490    0.0749    0.0530
Pt    0.3272    0.1864    0.0533
Pt    0.3278    0.1888    0.0974
Pt    0.3496    0.0303    0.0549
Pt    0.3285    0.2336    0.0519
Pt    0.3297    0.2337    0.0980
Pt    0.4844    0.1644    0.0538
Pt    0.2578    0.1218    0.0563
Pt    0.2599    0.1445    0.0298
Pt    0.3726    0.0536    0.0543
Pt    0.3716    0.1885    0.0541
Pt    0.3049    0.2107    0.0989
Pt    0.3729    0.2333    0.0530
Pt    0.4829    0.1206    0.0537
Pt    0.3056    0.2104    0.0526
Pt    0.3047    0.1659    0.0545
Pt    0.4142    0.0537    0.0539
Pt    0.3060    0.1226    0.0545
Pt    0.4181    0.1887    0.0548
Pt    0.4142    0.1880    0.1008
Pt    0.3026    0.0748    0.0991
Pt    0.4178    0.2359    0.0545
Pt    0.4854    0.0782    0.0976
Pt    0.4850    0.0744    0.0526
Pt    0.3032    0.0756    0.0540
Pt    0.3038    0.0292    0.0994
Pt    0.4597    0.0538    0.0518
Pt    0.4605    0.0537    0.0992
Pt    0.3029    0.0302    0.0532
Pt    0.4601    0.0965    0.0524
Pt    0.4827    0.2343    0.1207
Pt    0.4582    0.1431    0.0524
Pt    0.4844    0.2336    0.0758
Pt    0.4616    0.1865    0.0548
Pt    0.4636    0.1841    0.1020
Pt    0.4843    0.2343    0.0298
Pt    0.4617    0.2348    0.0523
Pt    0.4610    0.2337    0.0996
Pt    0.4839    0.0303    0.0988
Pt    0.4820    0.0295    0.0520
Pt    0.4837    0.1854    0.0780
Pt    0.4852    0.1879    0.0310
Pt    0.4355    0.0737    0.0998
Pt    0.2578    0.0526    0.0299
Pt    0.4820    0.1429    0.0764
Pt    0.4377    0.1203    0.0526
Pt    0.4840    0.1418    0.0307
Pt    0.4385    0.2334    0.0776
Pt    0.4816    0.0987    0.0755
Pt    0.4398    0.2336    0.0295
Pt    0.4381    0.1872    0.1208
Pt    0.4856    0.0991    0.0301
Pt    0.3025    0.0079    0.0301
Pt    0.2580    0.0073    0.0306
Pt    0.2809    0.0298    0.0309
Pt    0.2813    0.0306    0.0775
Pt    0.2819    0.0300    0.1215
Pt    0.2815    0.0753    0.0294
Pt    0.2807    0.0767    0.0759
Pt    0.2797    0.0772    0.1240
Pt    0.2814    0.1205    0.0325
Pt    0.2828    0.1658    0.0300
Pt    0.2814    0.1666    0.0784
Pt    0.2816    0.2111    0.0327
Pt    0.2806    0.2124    0.0768
Pt    0.2812    0.2106    0.1211
Pt    0.2576    0.1891    0.0309
Pt    0.4616    0.0079    0.0978
Pt    0.2589    0.1874    0.1233
Pt    0.3270    0.0307    0.0308
Pt    0.3270    0.0297    0.0764
Pt    0.3291    0.0302    0.1206
Pt    0.3258    0.0761    0.0310
Pt    0.3266    0.0744    0.0764
Pt    0.3279    0.0750    0.1227
Pt    0.3287    0.1210    0.0305
Pt    0.3269    0.1206    0.0777
Pt    0.3284    0.1651    0.0306
Pt    0.3258    0.1653    0.0789
Pt    0.3285    0.2080    0.0299
Pt    0.3283    0.2115    0.0759
Pt    0.3283    0.2105    0.1207
Pt    0.3261    0.0078    0.0526
Pt    0.4382    0.0085    0.1193
Pt    0.3730    0.0314    0.0312
Pt    0.3715    0.0778    0.0768
Pt    0.3725    0.2090    0.0314
Pt    0.3717    0.2117    0.0766
Pt    0.2578    0.2341    0.1205
Pt    0.3288    0.1438    0.0084
Pt    0.4138    0.0320    0.0301
Pt    0.4134    0.0299    0.0774
Pt    0.4140    0.0775    0.0286
Pt    0.4153    0.0775    0.0754
Pt    0.4149    0.1669    0.0776
Pt    0.4165    0.2114    0.0290
Pt    0.4155    0.2113    0.0775
Pt    0.5058    0.1639    0.0777
Pt    0.5067    0.1412    0.0569
Pt    0.4601    0.0299    0.0297
Pt    0.4595    0.0319    0.0751
Pt    0.4622    0.0308    0.1207
Pt    0.4599    0.0766    0.0290
Pt    0.4597    0.0746    0.0763
Pt    0.4608    0.0760    0.1196
Pt    0.4616    0.1204    0.0292
Pt    0.4573    0.1204    0.0748
Pt    0.4625    0.1658    0.0308
Pt    0.4592    0.1641    0.0776
Pt    0.4619    0.2108    0.0311
Pt    0.4619    0.2104    0.0774
Pt    0.4608    0.2094    0.1208
Pt    0.3277    0.2567    0.0292
Pt    0.4380    0.2566    0.1001
Pt    0.3725    0.0079    0.0561
Pt    0.5067    0.1637    0.0313
Pt    0.5066    0.0509    0.0528
Pt    0.2582    0.1880    0.0781
Pt    0.4396    0.1882    0.0798
Pt    0.4395    0.1880    0.0308
Pt    0.3040    0.0077    0.0767
Pt    0.3283    0.2569    0.0757
Pt    0.4355    0.1427    0.0755
Pt    0.4365    0.1432    0.0308
Pt    0.3499    0.0100    0.0320
Pt    0.3917    0.0294    0.0085
Pt    0.4385    0.0966    0.0750
Pt    0.5061    0.1190    0.0784
Pt    0.2823    0.2570    0.1209
Pt    0.5072    0.0758    0.0750
Pt    0.2580    0.0765    0.0984
Pt    0.5070    0.1202    0.0310
Pt    0.4861    0.0563    0.1215
Pt    0.3042    0.0532    0.0295
Pt    0.3027    0.0532    0.0770
Pt    0.3039    0.0542    0.1206
Pt    0.3055    0.1004    0.0311
Pt    0.3037    0.0995    0.0797
Pt    0.3057    0.1432    0.0309
Pt    0.3048    0.1434    0.0779
Pt    0.3052    0.1878    0.0306
Pt    0.3032    0.1889    0.0759
Pt    0.3039    0.1871    0.1203
Pt    0.3046    0.2335    0.0294
Pt    0.3051    0.2336    0.0763
Pt    0.3070    0.2343    0.1232
Pt    0.4390    0.2106    0.1001
Pt    0.4394    0.2125    0.0549
Pt    0.3498    0.0528    0.0313
Pt    0.3508    0.0528    0.0765
Pt    0.3494    0.0980    0.0765
Pt    0.3527    0.1861    0.0292
Pt    0.3506    0.1878    0.0759
Pt    0.3497    0.2327    0.0292
Pt    0.3505    0.2357    0.0761
Pt    0.4831    0.0527    0.0764
Pt    0.3922    0.0554    0.0300
Pt    0.3928    0.0536    0.0771
Pt    0.3930    0.1904    0.0773
Pt    0.3927    0.2342    0.0304
Pt    0.3946    0.2342    0.0756
Pt    0.4362    0.1651    0.0997
Pt    0.4353    0.1644    0.0524
Pt    0.4845    0.0516    0.0293
Pt    0.4373    0.0535    0.0298
Pt    0.4369    0.0534    0.0755
Pt    0.4362    0.0530    0.1210
Pt    0.4358    0.1001    0.0299
Pt    0.5064    0.2109    0.0762
Pt    0.2807    0.2334    0.0085
Pt    0.4832    0.0747    0.0086
Pt    0.4851    0.0076    0.0741
Pt    0.3718    0.0553    0.0075
Pt    0.4850    0.0072    0.0302
Pt    0.5066    0.2105    0.0311
Pt    0.5064    0.2107    0.1209
Pt    0.3479    0.0767    0.0077
Pt    0.5059    0.1871    0.0999
Pt    0.5069    0.0299    0.0758
Pt    0.2581    0.1649    0.0547
Pt    0.2822    0.1883    0.0076
Pt    0.5072    0.0301    0.0287
Pt    0.5063    0.2351    0.0989
Pt    0.5068    0.2338    0.0529
Pt    0.3518    0.2569    0.0536
Pt    0.4168    0.2561    0.0778
Pt    0.4825    0.2562    0.0990
Pt    0.2579    0.2568    0.0975
Pt    0.4843    0.2570    0.0531
Pt    0.3735    0.2570    0.0759
Pt    0.2800    0.2568    0.0307
Pt    0.2828    0.2561    0.0768
Pt    0.3066    0.2563    0.1000
Pt    0.4608    0.2569    0.0759
Pt    0.4404    0.2570    0.0528
Pt    0.3283    0.0086    0.0086
Pt    0.4840    0.1649    0.0078
Pt    0.3039    0.0770    0.0077
Pt    0.4168    0.2333    0.0083
Pt    0.5061    0.1421    0.0080
Pt    0.3269    0.0997    0.0078
Pt    0.3049    0.0302    0.0081
Pt    0.5072    0.2334    0.0088
Pt    0.2582    0.2101    0.0084
Pt    0.4591    0.1436    0.0084
Pt    0.2582    0.1669    0.0078
Pt    0.3033    0.2563    0.0074
Pt    0.2574    0.0998    0.0311
Pt    0.2574    0.0075    0.1218
Pt    0.4377    0.0072    0.0293
Pt    0.2577    0.1213    0.2321
Pt    0.2583    0.2112    0.1442
Pt    0.4378    0.0072    0.1650
Pt    0.2794    0.0544    0.1451
Pt    0.2799    0.0533    0.1876
Pt    0.2808    0.0553    0.2331
Pt    0.2785    0.0999    0.1859
Pt    0.2802    0.1000    0.2339
Pt    0.2790    0.1447    0.2310
Pt    0.2798    0.1879    0.1455
Pt    0.2789    0.1873    0.1883
Pt    0.2793    0.1873    0.2327
Pt    0.2802    0.2341    0.1430
Pt    0.2806    0.2344    0.1890
Pt    0.2798    0.2342    0.2342
Pt    0.4837    0.2111    0.2351
Pt    0.4825    0.2116    0.1880
Pt    0.4842    0.2095    0.1434
Pt    0.3278    0.0514    0.1450
Pt    0.3285    0.0524    0.1885
Pt    0.3252    0.0552    0.2335
Pt    0.3249    0.1002    0.1855
Pt    0.3276    0.1015    0.2361
Pt    0.3255    0.1436    0.1888
Pt    0.3269    0.1884    0.1433
Pt    0.3248    0.1886    0.1881
Pt    0.3266    0.1878    0.2345
Pt    0.3262    0.2346    0.1881
Pt    0.3269    0.2346    0.2334
Pt    0.4842    0.1646    0.2359
Pt    0.3704    0.0533    0.1893
Pt    0.3715    0.0559    0.2339
Pt    0.3692    0.1868    0.1893
Pt    0.3709    0.1854    0.2345
Pt    0.3718    0.2319    0.1894
Pt    0.3714    0.2334    0.2334
Pt    0.4835    0.1623    0.1874
Pt    0.4833    0.1206    0.2331
Pt    0.4138    0.0520    0.1860
Pt    0.4171    0.0533    0.2329
Pt    0.4164    0.0971    0.1879
Pt    0.4172    0.1882    0.1883
Pt    0.4151    0.1881    0.2343
Pt    0.4141    0.2306    0.1853
Pt    0.4159    0.2356    0.2341
Pt    0.4835    0.1211    0.1858
Pt    0.4829    0.0745    0.2335
Pt    0.4868    0.0766    0.1856
Pt    0.4602    0.0537    0.1428
Pt    0.4612    0.0541    0.1868
Pt    0.4629    0.0510    0.2353
Pt    0.4625    0.0990    0.1884
Pt    0.4623    0.0984    0.2357
Pt    0.4600    0.1422    0.1868
Pt    0.4593    0.1427    0.2342
Pt    0.4633    0.1858    0.1418
Pt    0.4636    0.1860    0.1868
Pt    0.4620    0.1867    0.2356
Pt    0.4605    0.2345    0.1418
Pt    0.4605    0.2344    0.1871
Pt    0.4606    0.2354    0.2331
Pt    0.4855    0.0294    0.2350
Pt    0.4864    0.0304    0.1898
Pt    0.4861    0.0313    0.1428
Pt    0.4375    0.0310    0.1440
Pt    0.2807    0.1218    0.2568
Pt    0.3493    0.2331    0.2570
Pt    0.3931    0.0074    0.2114
Pt    0.4163    0.0074    0.2324
Pt    0.2794    0.2098    0.2566
Pt    0.3939    0.2100    0.2343
Pt    0.3034    0.0758    0.1442
Pt    0.3934    0.2081    0.1887
Pt    0.3951    0.0767    0.2356
Pt    0.3926    0.0755    0.1891
Pt    0.3944    0.0313    0.2330
Pt    0.2808    0.0280    0.1656
Pt    0.2794    0.0322    0.2109
Pt    0.2582    0.2344    0.1669
Pt    0.2806    0.0773    0.1649
Pt    0.2815    0.0768    0.2097
Pt    0.2797    0.0073    0.2351
Pt    0.2797    0.1217    0.2098
Pt    0.4403    0.0075    0.2105
Pt    0.2764    0.1655    0.2094
Pt    0.3037    0.0079    0.2101
Pt    0.2808    0.2118    0.1675
Pt    0.2793    0.2111    0.2105
Pt    0.4168    0.0089    0.1861
Pt    0.4173    0.0298    0.2565
Pt    0.3486    0.0544    0.2569
Pt    0.5073    0.1210    0.2094
Pt    0.3270    0.0273    0.1668
Pt    0.3254    0.0308    0.2111
Pt    0.5068    0.2091    0.1662
Pt    0.3279    0.0761    0.1659
Pt    0.3261    0.0792    0.2117
Pt    0.5048    0.1197    0.2554
Pt    0.3260    0.1202    0.2107
Pt    0.3247    0.1653    0.1662
Pt    0.3263    0.1659    0.2118
Pt    0.5063    0.2357    0.2350
Pt    0.3262    0.2115    0.1641
Pt    0.3271    0.2090    0.2104
Pt    0.3038    0.0780    0.2341
Pt    0.3040    0.0540    0.2567
Pt    0.5067    0.0981    0.2333
Pt    0.5059    0.2334    0.1440
Pt    0.3716    0.0309    0.2112
Pt    0.3259    0.2107    0.2563
Pt    0.3714    0.0779    0.2112
Pt    0.2574    0.2560    0.2341
Pt    0.3718    0.2106    0.2117
Pt    0.4611    0.0075    0.2331
Pt    0.3011    0.1640    0.1858
Pt    0.5059    0.2119    0.2111
Pt    0.4145    0.0295    0.2090
Pt    0.3708    0.0074    0.2347
Pt    0.4148    0.0773    0.1641
Pt    0.4171    0.0770    0.2111
Pt    0.5049    0.2334    0.1873
Pt    0.4161    0.2099    0.2107
Pt    0.4848    0.0978    0.2100
Pt    0.4598    0.1647    0.2572
Pt    0.2776    0.1648    0.2562
Pt    0.4624    0.0298    0.1663
Pt    0.4626    0.0314    0.2110
Pt    0.5064    0.1642    0.2111
Pt    0.4618    0.0775    0.1650
Pt    0.4618    0.0751    0.2121
Pt    0.4845    0.1418    0.2106
Pt    0.4600    0.1205    0.2103
Pt    0.4843    0.0545    0.2097
Pt    0.4616    0.1652    0.2108
Pt    0.3046    0.0758    0.1875
Pt    0.4612    0.2096    0.1646
Pt    0.4621    0.2110    0.2121
Pt    0.4382    0.0770    0.1417
Pt    0.4857    0.0549    0.1650
Pt    0.3020    0.1217    0.1878
Pt    0.4404    0.0321    0.1872
Pt    0.3010    0.0296    0.2324
Pt    0.3028    0.1886    0.2561
Pt    0.3020    0.0309    0.1886
Pt    0.4850    0.0080    0.1655
Pt    0.3489    0.2097    0.2337
Pt    0.3732    0.2560    0.2121
Pt    0.3487    0.2102    0.1879
Pt    0.3484    0.1649    0.1890
Pt    0.4591    0.1221    0.2559
Pt    0.3499    0.0784    0.2343
Pt    0.3040    0.0289    0.1446
Pt    0.4388    0.0990    0.2148
Pt    0.4842    0.2350    0.2112
Pt    0.3476    0.0781    0.1889
Pt    0.3480    0.0294    0.2342
Pt    0.3493    0.0289    0.1879
Pt    0.4836    0.2335    0.1654
Pt    0.4843    0.1879    0.2105
Pt    0.4376    0.2117    0.2353
Pt    0.3033    0.0534    0.1645
Pt    0.3040    0.0542    0.2105
Pt    0.4388    0.2348    0.2094
Pt    0.3023    0.0995    0.2089
Pt    0.4392    0.0302    0.2327
Pt    0.3029    0.1446    0.2108
Pt    0.3024    0.2117    0.2336
Pt    0.3030    0.1887    0.1656
Pt    0.3021    0.1877    0.2106
Pt    0.3036    0.2125    0.1888
Pt    0.3040    0.2343    0.1625
Pt    0.3031    0.2344    0.2104
Pt    0.3050    0.1643    0.2344
Pt    0.4382    0.2105    0.1878
Pt    0.4391    0.2095    0.1436
Pt    0.3487    0.0552    0.2113
Pt    0.4848    0.1853    0.1658
Pt    0.3476    0.1867    0.1661
Pt    0.3489    0.1865    0.2123
Pt    0.3039    0.1214    0.2333
Pt    0.3485    0.2326    0.2104
Pt    0.4397    0.1884    0.2122
Pt    0.4381    0.1663    0.2334
Pt    0.4394    0.1651    0.1866
Pt    0.3947    0.0551    0.2111
Pt    0.4395    0.1867    0.1653
Pt    0.3937    0.1861    0.2122
Pt    0.3035    0.2107    0.1425
Pt    0.3952    0.2333    0.2124
Pt    0.4375    0.1447    0.2102
Pt    0.4356    0.1198    0.1885
Pt    0.4388    0.0762    0.2362
Pt    0.4395    0.0766    0.1883
Pt    0.4366    0.0549    0.1648
Pt    0.4378    0.0532    0.2105
Pt    0.4391    0.2351    0.1654
Pt    0.4380    0.0973    0.1661
Pt    0.3255    0.2566    0.2566
Pt    0.2788    0.0333    0.2552
Pt    0.3034    0.2340    0.2562
Pt    0.3499    0.2560    0.1874
Pt    0.5071    0.0522    0.2351
Pt    0.4844    0.2565    0.1873
Pt    0.3493    0.2566    0.2346
Pt    0.2811    0.2567    0.2102
Pt    0.4826    0.2344    0.2568
Pt    0.3709    0.2106    0.2559
Pt    0.4393    0.2347    0.2572
Pt    0.3255    0.0313    0.2547
Pt    0.4374    0.1884    0.2568
Pt    0.2574    0.0076    0.2570
Pt    0.5067    0.0746    0.2567
Pt    0.3034    0.0997    0.2571
Pt    0.2799    0.2563    0.2568
Pt    0.3934    0.2350    0.2573
Pt    0.3727    0.0313    0.2574
Pt    0.3933    0.1879    0.2577
Pt    0.4387    0.0991    0.2577
Pt    0.2792    0.0543    0.2792
Pt    0.2816    0.0543    0.3257
Pt    0.2817    0.0549    0.3714
Pt    0.2795    0.0996    0.2808
Pt    0.2796    0.0998    0.3263
Pt    0.2799    0.1442    0.2809
Pt    0.2795    0.1881    0.2794
Pt    0.2801    0.1876    0.3267
Pt    0.2802    0.1861    0.3699
Pt    0.2806    0.2326    0.2788
Pt    0.2803    0.2338    0.3263
Pt    0.2807    0.2346    0.3712
Pt    0.4844    0.2103    0.3738
Pt    0.4845    0.2109    0.3262
Pt    0.4843    0.2116    0.2804
Pt    0.3274    0.0537    0.2805
Pt    0.3260    0.0543    0.3255
Pt    0.3277    0.0555    0.3709
Pt    0.3255    0.1006    0.2817
Pt    0.3278    0.0995    0.3261
Pt    0.3265    0.1425    0.3268
Pt    0.3258    0.1868    0.2808
Pt    0.3252    0.1881    0.3271
Pt    0.3245    0.1893    0.3721
Pt    0.3263    0.2347    0.2801
Pt    0.3249    0.2338    0.3261
Pt    0.4844    0.1641    0.3276
Pt    0.3715    0.0529    0.2815
Pt    0.3715    0.0514    0.3268
Pt    0.3707    0.1877    0.2808
Pt    0.3697    0.1880    0.3278
Pt    0.3715    0.2348    0.2796
Pt    0.3695    0.2337    0.3296
Pt    0.4817    0.1652    0.2817
Pt    0.4820    0.1224    0.3280
Pt    0.4160    0.0527    0.2810
Pt    0.4121    0.0509    0.3266
Pt    0.4156    0.0976    0.3267
Pt    0.4132    0.1881    0.2805
Pt    0.4144    0.1894    0.3261
Pt    0.4162    0.2358    0.2805
Pt    0.4144    0.2346    0.3260
Pt    0.4824    0.1204    0.2796
Pt    0.4841    0.0760    0.3266
Pt    0.4837    0.0739    0.2825
Pt    0.4609    0.0519    0.2829
Pt    0.4618    0.0528    0.3290
Pt    0.4608    0.0524    0.3733
Pt    0.4603    0.0992    0.2816
Pt    0.4612    0.0994    0.3268
Pt    0.4582    0.1430    0.2794
Pt    0.4598    0.1457    0.3269
Pt    0.4613    0.1885    0.2801
Pt    0.4611    0.1881    0.3270
Pt    0.4610    0.1885    0.3692
Pt    0.4620    0.2348    0.2807
Pt    0.4618    0.2346    0.3266
Pt    0.4616    0.2345    0.3724
Pt    0.4827    0.0303    0.3710
Pt    0.4839    0.0291    0.3286
Pt    0.4837    0.0299    0.2810
Pt    0.4847    0.0074    0.3047
Pt    0.3272    0.0094    0.3724
Pt    0.2791    0.0075    0.2803
Pt    0.2574    0.0305    0.2788
Pt    0.4373    0.0741    0.3725
Pt    0.2574    0.1881    0.3028
Pt    0.4372    0.0732    0.3255
Pt    0.3255    0.0780    0.2577
Pt    0.3714    0.0073    0.2811
Pt    0.3025    0.0081    0.2574
Pt    0.4384    0.0758    0.2803
Pt    0.4359    0.0301    0.3709
Pt    0.2798    0.0306    0.3021
Pt    0.2806    0.0303    0.3509
Pt    0.2807    0.0760    0.3041
Pt    0.2813    0.0773    0.3485
Pt    0.2789    0.1211    0.3037
Pt    0.2794    0.1639    0.3056
Pt    0.2803    0.2110    0.3034
Pt    0.2802    0.2110    0.3493
Pt    0.3043    0.0079    0.3496
Pt    0.2804    0.0074    0.3257
Pt    0.3248    0.0315    0.3040
Pt    0.3263    0.0311    0.3493
Pt    0.3274    0.0769    0.3042
Pt    0.3279    0.0775    0.3489
Pt    0.3268    0.1216    0.3039
Pt    0.3260    0.1638    0.3030
Pt    0.3259    0.1645    0.3493
Pt    0.3258    0.2105    0.3028
Pt    0.3249    0.2129    0.3487
Pt    0.3253    0.0080    0.2795
Pt    0.2810    0.0771    0.2579
Pt    0.3707    0.0298    0.3028
Pt    0.3707    0.0764    0.3025
Pt    0.3715    0.2113    0.3028
Pt    0.3924    0.2566    0.3277
Pt    0.4163    0.0307    0.3036
Pt    0.4147    0.0765    0.3033
Pt    0.4174    0.0764    0.3490
Pt    0.4140    0.2116    0.3030
Pt    0.4159    0.0776    0.2574
Pt    0.4610    0.0296    0.3047
Pt    0.4593    0.0291    0.3500
Pt    0.4616    0.0752    0.3045
Pt    0.4620    0.0764    0.3516
Pt    0.4582    0.1207    0.3044
Pt    0.4588    0.1649    0.3042
Pt    0.4610    0.2121    0.3040
Pt    0.4621    0.2119    0.3483
Pt    0.2595    0.0536    0.3494
Pt    0.4838    0.1876    0.2582
Pt    0.4391    0.2570    0.3258
Pt    0.4373    0.0288    0.3280
Pt    0.4393    0.0294    0.2814
Pt    0.4383    0.0071    0.2585
Pt    0.2584    0.0302    0.3264
Pt    0.4161    0.2116    0.2581
Pt    0.2577    0.0763    0.2809
Pt    0.3928    0.2114    0.3274
Pt    0.2576    0.1641    0.3284
Pt    0.3936    0.2112    0.2794
Pt    0.2817    0.0089    0.3720
Pt    0.3933    0.0757    0.3272
Pt    0.3031    0.0540    0.3029
Pt    0.3035    0.0544    0.3489
Pt    0.3037    0.0993    0.3050
Pt    0.3042    0.1428    0.3035
Pt    0.3018    0.1851    0.3032
Pt    0.3020    0.1883    0.3480
Pt    0.3038    0.2339    0.3028
Pt    0.3028    0.2347    0.3482
Pt    0.4387    0.2118    0.3706
Pt    0.3488    0.0527    0.3034
Pt    0.3484    0.1872    0.3053
Pt    0.3463    0.1881    0.3507
Pt    0.3477    0.2340    0.3043
Pt    0.4359    0.2115    0.3264
Pt    0.3921    0.0518    0.3034
Pt    0.3913    0.1880    0.3060
Pt    0.3919    0.2358    0.3034
Pt    0.4377    0.2102    0.2814
Pt    0.4362    0.1659    0.3254
Pt    0.4378    0.0529    0.3033
Pt    0.4373    0.0532    0.3485
Pt    0.4365    0.0991    0.3037
Pt    0.4391    0.0968    0.3473
Pt    0.4371    0.1418    0.3040
Pt    0.4369    0.1888    0.3038
Pt    0.4378    0.1894    0.3477
Pt    0.4383    0.2340    0.3036
Pt    0.4370    0.2334    0.3489
Pt    0.4356    0.1658    0.2802
Pt    0.4381    0.1214    0.3270
Pt    0.4840    0.0526    0.3059
Pt    0.4849    0.0550    0.3518
Pt    0.4840    0.0988    0.3039
Pt    0.4829    0.1419    0.3033
Pt    0.4832    0.1869    0.3038
Pt    0.4842    0.1866    0.3489
Pt    0.4846    0.2340    0.3039
Pt    0.4848    0.2333    0.3503
Pt    0.3015    0.0310    0.2789
Pt    0.3027    0.0299    0.3267
Pt    0.3054    0.0304    0.3730
Pt    0.3036    0.0776    0.2807
Pt    0.3047    0.0772    0.3270
Pt    0.3033    0.0786    0.3703
Pt    0.3020    0.1209    0.2808
Pt    0.3031    0.1214    0.3271
Pt    0.3023    0.1657    0.2794
Pt    0.3032    0.1651    0.3269
Pt    0.3034    0.2099    0.2792
Pt    0.3032    0.2116    0.3251
Pt    0.3027    0.2116    0.3725
Pt    0.3940    0.0781    0.2807
Pt    0.2576    0.1200    0.2814
Pt    0.5064    0.1195    0.3047
Pt    0.3485    0.0314    0.2793
Pt    0.3489    0.0282    0.3278
Pt    0.3479    0.0776    0.2806
Pt    0.3491    0.0740    0.3267
Pt    0.3489    0.1650    0.3275
Pt    0.3483    0.2109    0.2809
Pt    0.3486    0.2107    0.3272
Pt    0.3948    0.0292    0.2802
Pt    0.2585    0.0077    0.3493
Pt    0.3029    0.2559    0.2796
Pt    0.2585    0.0753    0.3712
Pt    0.3949    0.0543    0.2575
Pt    0.4157    0.2568    0.3046
Pt    0.3711    0.2569    0.2581
Pt    0.4601    0.2555    0.3500
Pt    0.2796    0.2569    0.3031
Pt    0.3708    0.0752    0.2591
Pt    0.4854    0.0523    0.2586
Pt    0.5071    0.1648    0.2583
Pt    0.5064    0.0767    0.3498
Pt    0.5059    0.1870    0.3261
Pt    0.5062    0.2093    0.3505
Pt    0.5056    0.0988    0.3284
Pt    0.3487    0.2561    0.3276
Pt    0.5066    0.0303    0.3049
Pt    0.5069    0.2339    0.2785
Pt    0.4610    0.0739    0.2585
Pt    0.5062    0.0289    0.2590
Pt    0.4609    0.2109    0.2578
Pt    0.4611    0.0286    0.2581
Pt    0.4845    0.2562    0.3272
Pt    0.5065    0.0984    0.2802
Pt    0.5057    0.1420    0.2810
Pt    0.5060    0.1643    0.3037
Pt    0.5070    0.2097    0.3023
Pt    0.3255    0.1634    0.2590
Pt    0.3036    0.1412    0.2583
Pt    0.4831    0.0975    0.2585
Pt    0.3484    0.1873    0.2586
Pt    0.4385    0.0527    0.2576
Pt    0.4829    0.1429    0.2577
Pt    0.3689    0.2570    0.3039
Pt    0.4833    0.0072    0.3497
Pt    0.2581    0.0072    0.4845
Pt    0.2578    0.0317    0.4164
Pt    0.2575    0.0536    0.4840
Pt    0.2805    0.0548    0.4161
Pt    0.2799    0.0551    0.4614
Pt    0.2590    0.0803    0.4147
Pt    0.2810    0.0984    0.4603
Pt    0.4391    0.0084    0.4405
Pt    0.2807    0.1423    0.4587
Pt    0.2575    0.0986    0.4856
Pt    0.2792    0.1869    0.4166
Pt    0.2792    0.1883    0.4610
Pt    0.5069    0.1889    0.4623
Pt    0.2799    0.2332    0.4166
Pt    0.2815    0.2354    0.4616
Pt    0.3719    0.0085    0.4608
Pt    0.2803    0.2333    0.5063
Pt    0.4845    0.2111    0.4603
Pt    0.4862    0.2102    0.4156
Pt    0.3262    0.0533    0.4170
Pt    0.3274    0.0536    0.4613
Pt    0.2577    0.1438    0.4840
Pt    0.3270    0.1010    0.4152
Pt    0.3264    0.0988    0.4593
Pt    0.3280    0.0080    0.4158
Pt    0.3287    0.1440    0.4617
Pt    0.2799    0.0096    0.4155
Pt    0.3275    0.1891    0.4157
Pt    0.3274    0.1886    0.4613
Pt    0.4610    0.2334    0.5071
Pt    0.3268    0.2361    0.4158
Pt    0.3273    0.2329    0.4607
Pt    0.3709    0.2334    0.5071
Pt    0.4611    0.2559    0.3935
Pt    0.4848    0.1641    0.4608
Pt    0.3725    0.0531    0.4612
Pt    0.5067    0.0073    0.4613
Pt    0.3721    0.1879    0.4611
Pt    0.3719    0.2344    0.4610
Pt    0.3487    0.2095    0.5068
Pt    0.3033    0.2112    0.5071
Pt    0.4847    0.1202    0.4599
Pt    0.4146    0.0525    0.4618
Pt    0.4832    0.0076    0.4383
Pt    0.4171    0.1885    0.4154
Pt    0.4147    0.1873    0.4624
Pt    0.3260    0.0076    0.5073
Pt    0.4152    0.2341    0.4615
Pt    0.3510    0.0758    0.4621
Pt    0.3048    0.2567    0.4619
Pt    0.4827    0.0767    0.4618
Pt    0.4859    0.0771    0.4158
Pt    0.4612    0.0540    0.4163
Pt    0.4595    0.0525    0.4620
Pt    0.5072    0.2346    0.4628
Pt    0.4593    0.0992    0.4605
Pt    0.3473    0.0764    0.4132
Pt    0.4594    0.1423    0.4590
Pt    0.3482    0.0307    0.4626
Pt    0.4636    0.1879    0.4153
Pt    0.4622    0.1867    0.4611
Pt    0.4388    0.2552    0.4157
Pt    0.4624    0.2343    0.4160
Pt    0.4623    0.2345    0.4615
Pt    0.4395    0.0086    0.4851
Pt    0.5059    0.0767    0.4842
Pt    0.4846    0.0295    0.4601
Pt    0.4847    0.0307    0.4154
Pt    0.4366    0.0766    0.4608
Pt    0.2810    0.0546    0.5064
Pt    0.4377    0.0783    0.4146
Pt    0.3038    0.0765    0.4613
Pt    0.3046    0.2121    0.4589
Pt    0.3043    0.0778    0.4157
Pt    0.4842    0.0074    0.4855
Pt    0.3056    0.1210    0.5065
Pt    0.4361    0.0310    0.4625
Pt    0.4375    0.0301    0.4154
Pt    0.4859    0.2343    0.4387
Pt    0.4390    0.2331    0.4383
Pt    0.4387    0.1868    0.4836
Pt    0.2810    0.0323    0.3943
Pt    0.2783    0.0305    0.4401
Pt    0.2815    0.0314    0.4837
Pt    0.2821    0.0773    0.3933
Pt    0.2811    0.0770    0.4383
Pt    0.2811    0.0785    0.4842
Pt    0.2794    0.1200    0.4841
Pt    0.2790    0.1660    0.4388
Pt    0.2810    0.1668    0.4838
Pt    0.2798    0.2105    0.3933
Pt    0.2791    0.2113    0.4393
Pt    0.2797    0.2107    0.4840
Pt    0.4158    0.2563    0.4371
Pt    0.4171    0.2558    0.4852
Pt    0.4847    0.2345    0.3945
Pt    0.3272    0.0308    0.3960
Pt    0.3278    0.0298    0.4388
Pt    0.3245    0.0315    0.4847
Pt    0.3245    0.0785    0.3925
Pt    0.3279    0.0773    0.4377
Pt    0.3276    0.0773    0.4831
Pt    0.3267    0.1223    0.4376
Pt    0.3280    0.1212    0.4814
Pt    0.3275    0.1659    0.4403
Pt    0.3271    0.1652    0.4832
Pt    0.3278    0.2124    0.3950
Pt    0.3289    0.2130    0.4366
Pt    0.3270    0.2110    0.4838
Pt    0.3046    0.0771    0.5072
Pt    0.4845    0.1413    0.4380
Pt    0.3711    0.0300    0.4843
Pt    0.3707    0.0750    0.4378
Pt    0.3709    0.2100    0.4372
Pt    0.3744    0.2098    0.4832
Pt    0.4836    0.1885    0.4847
Pt    0.4340    0.1223    0.4588
Pt    0.4141    0.0283    0.4390
Pt    0.4141    0.0289    0.4851
Pt    0.4150    0.0748    0.4356
Pt    0.4157    0.0762    0.4848
Pt    0.4185    0.1667    0.4372
Pt    0.4166    0.2122    0.4362
Pt    0.4143    0.2097    0.4849
Pt    0.5069    0.0297    0.3936
Pt    0.4160    0.1878    0.5069
Pt    0.4592    0.0290    0.3939
Pt    0.4619    0.0307    0.4374
Pt    0.4610    0.0307    0.4839
Pt    0.4602    0.0762    0.3946
Pt    0.4608    0.0768    0.4365
Pt    0.4608    0.0775    0.4842
Pt    0.4580    0.1193    0.4371
Pt    0.4590    0.1219    0.4835
Pt    0.4631    0.1656    0.4367
Pt    0.4633    0.1643    0.4846
Pt    0.4619    0.2100    0.3934
Pt    0.4625    0.2118    0.4373
Pt    0.4619    0.2107    0.4839
Pt    0.4846    0.1889    0.4396
Pt    0.4380    0.2333    0.4828
Pt    0.4836    0.1006    0.4847
Pt    0.3024    0.0305    0.4605
Pt    0.3942    0.2103    0.4604
Pt    0.3941    0.0759    0.4600
Pt    0.3037    0.2122    0.4170
Pt    0.5069    0.1647    0.4843
Pt    0.2792    0.2567    0.4832
Pt    0.3933    0.0292    0.4610
Pt    0.4400    0.1890    0.4362
Pt    0.4379    0.1893    0.3923
Pt    0.3043    0.0306    0.4173
Pt    0.4842    0.0529    0.4852
Pt    0.4845    0.1418    0.4832
Pt    0.4841    0.0530    0.4382
Pt    0.4374    0.1459    0.4836
Pt    0.3506    0.2112    0.4610
Pt    0.4845    0.2340    0.4847
Pt    0.4850    0.0546    0.3931
Pt    0.4838    0.0988    0.4376
Pt    0.3048    0.0545    0.3957
Pt    0.3042    0.0543    0.4396
Pt    0.3040    0.0538    0.4848
Pt    0.3026    0.1018    0.4378
Pt    0.3047    0.0988    0.4837
Pt    0.3050    0.1445    0.4375
Pt    0.3029    0.1432    0.4844
Pt    0.3021    0.1886    0.3942
Pt    0.3036    0.1873    0.4373
Pt    0.3037    0.1898    0.4831
Pt    0.3050    0.2355    0.3927
Pt    0.3023    0.2356    0.4375
Pt    0.3039    0.2336    0.4849
Pt    0.3040    0.1651    0.4608
Pt    0.4381    0.2107    0.4611
Pt    0.3496    0.0509    0.4381
Pt    0.3489    0.0529    0.4849
Pt    0.3494    0.0984    0.4394
Pt    0.3493    0.1879    0.4382
Pt    0.3484    0.1894    0.4844
Pt    0.3517    0.2348    0.4361
Pt    0.3490    0.2356    0.4835
Pt    0.4365    0.2145    0.4126
Pt    0.3947    0.0525    0.4373
Pt    0.3929    0.0548    0.4833
Pt    0.3956    0.1881    0.4389
Pt    0.3936    0.2326    0.4380
Pt    0.3927    0.2343    0.4853
Pt    0.3040    0.1228    0.4600
Pt    0.4391    0.1654    0.4602
Pt    0.4407    0.1664    0.4139
Pt    0.4360    0.0535    0.3954
Pt    0.4371    0.0511    0.4382
Pt    0.4381    0.0541    0.4847
Pt    0.4360    0.0981    0.4397
Pt    0.4345    0.1013    0.4821
Pt    0.4397    0.1441    0.4353
Pt    0.3490    0.0082    0.4833
Pt    0.3289    0.1445    0.5063
Pt    0.3489    0.0783    0.5070
Pt    0.3942    0.2568    0.4609
Pt    0.3255    0.2570    0.4857
Pt    0.3282    0.1012    0.5063
Pt    0.3722    0.0574    0.5061
Pt    0.5061    0.0523    0.4622
Pt    0.4596    0.1423    0.5070
Pt    0.4393    0.2109    0.5066
Pt    0.2813    0.1880    0.5069
Pt    0.4597    0.1001    0.5059
Pt    0.4386    0.0303    0.5072
Pt    0.4844    0.0762    0.5061
Pt    0.3035    0.0304    0.5072
Pt    0.2797    0.0075    0.5062
Pt    0.4352    0.0072    0.3935
Pt    0.3263    0.1876    0.5061
Pt    0.3484    0.2571    0.4598
Pt    0.4594    0.1874    0.5072
Pt    0.4830    0.1201    0.5073
Pt    0.2810    0.0989    0.5072
Pt    0.4386    0.0077    0.5306
Pt    0.2575    0.1889    0.5295
Pt    0.2815    0.0523    0.5531
Pt    0.2796    0.0530    0.5981
Pt    0.2808    0.0993    0.5539
Pt    0.2807    0.1421    0.5557
Pt    0.2803    0.1894    0.5525
Pt    0.2809    0.1861    0.5998
Pt    0.2807    0.2343    0.5528
Pt    0.2813    0.2344    0.5993
Pt    0.4831    0.2111    0.5989
Pt    0.4828    0.2109    0.5564
Pt    0.3279    0.0534    0.5531
Pt    0.3267    0.0526    0.5993
Pt    0.3275    0.0992    0.5533
Pt    0.3258    0.0981    0.5972
Pt    0.3288    0.1439    0.5519
Pt    0.3258    0.1882    0.5540
Pt    0.3262    0.1858    0.6000
Pt    0.3269    0.2334    0.5531
Pt    0.3286    0.2346    0.5993
Pt    0.4846    0.1652    0.5550
Pt    0.3727    0.0522    0.5524
Pt    0.3727    0.1879    0.5536
Pt    0.3702    0.2348    0.5527
Pt    0.4867    0.1211    0.5545
Pt    0.4153    0.0521    0.5527
Pt    0.4145    0.1870    0.5531
Pt    0.4157    0.1889    0.6003
Pt    0.4154    0.2342    0.5537
Pt    0.4850    0.0774    0.6007
Pt    0.4828    0.0755    0.5536
Pt    0.4623    0.0523    0.5545
Pt    0.4613    0.0539    0.5993
Pt    0.4612    0.0975    0.5547
Pt    0.4621    0.1419    0.5554
Pt    0.4601    0.1870    0.5544
Pt    0.4597    0.1869    0.5999
Pt    0.4607    0.2324    0.5543
Pt    0.4594    0.2341    0.5997
Pt    0.4847    0.0299    0.5997
Pt    0.4852    0.0285    0.5529
Pt    0.3500    0.0088    0.5763
Pt    0.2576    0.2319    0.5782
Pt    0.3272    0.0075    0.5980
Pt    0.3927    0.2120    0.5538
Pt    0.3261    0.0071    0.5521
Pt    0.3953    0.0763    0.5538
Pt    0.2581    0.0764    0.5091
Pt    0.3945    0.0300    0.5556
Pt    0.2805    0.0308    0.5296
Pt    0.2795    0.0294    0.5753
Pt    0.2817    0.0290    0.6222
Pt    0.2808    0.0772    0.5308
Pt    0.2800    0.0758    0.5760
Pt    0.2794    0.0750    0.6221
Pt    0.2792    0.1214    0.5311
Pt    0.2816    0.1639    0.5303
Pt    0.2811    0.1652    0.5764
Pt    0.2815    0.2116    0.5282
Pt    0.2807    0.2115    0.5755
Pt    0.2793    0.2111    0.6209
Pt    0.3922    0.0313    0.5084
Pt    0.3934    0.0073    0.5297
Pt    0.3489    0.0310    0.5079
Pt    0.3271    0.0320    0.5314
Pt    0.3256    0.0294    0.5749
Pt    0.3274    0.0293    0.6184
Pt    0.3269    0.0765    0.5304
Pt    0.3261    0.0748    0.5759
Pt    0.3244    0.0759    0.6206
Pt    0.3292    0.1219    0.5292
Pt    0.3274    0.1222    0.5765
Pt    0.3280    0.1646    0.5288
Pt    0.3281    0.1657    0.5756
Pt    0.3260    0.2097    0.5288
Pt    0.3266    0.2090    0.5770
Pt    0.3263    0.2092    0.6209
Pt    0.2579    0.1647    0.5538
Pt    0.2574    0.1212    0.5566
Pt    0.3713    0.0304    0.5314
Pt    0.3727    0.0747    0.5754
Pt    0.3713    0.2108    0.5298
Pt    0.3702    0.2117    0.5761
Pt    0.2576    0.2351    0.5292
Pt    0.4601    0.0542    0.5082
Pt    0.4159    0.0304    0.5302
Pt    0.4171    0.0290    0.5772
Pt    0.4157    0.0774    0.5309
Pt    0.4164    0.0745    0.5767
Pt    0.4156    0.1658    0.5757
Pt    0.4154    0.2105    0.5314
Pt    0.4147    0.2114    0.5767
Pt    0.2579    0.0979    0.5324
Pt    0.4831    0.0071    0.5774
Pt    0.4618    0.0304    0.5308
Pt    0.4604    0.0297    0.5796
Pt    0.4598    0.0308    0.6218
Pt    0.4622    0.0775    0.5312
Pt    0.4608    0.0760    0.5775
Pt    0.4625    0.0757    0.6207
Pt    0.4612    0.1215    0.5309
Pt    0.4634    0.1215    0.5787
Pt    0.4608    0.1647    0.5332
Pt    0.4637    0.1634    0.5798
Pt    0.4599    0.2097    0.5301
Pt    0.4605    0.2102    0.5780
Pt    0.4602    0.2113    0.6218
Pt    0.4850    0.0072    0.6207
Pt    0.2580    0.1424    0.5327
Pt    0.3047    0.2556    0.5528
Pt    0.2576    0.0504    0.6222
Pt    0.4630    0.2562    0.5321
Pt    0.3496    0.2111    0.5529
Pt    0.5056    0.1440    0.5080
Pt    0.3489    0.0758    0.5971
Pt    0.4154    0.0073    0.5535
Pt    0.3499    0.0772    0.5521
Pt    0.3506    0.0295    0.5545
Pt    0.4841    0.2109    0.5076
Pt    0.4151    0.2332    0.5084
Pt    0.5069    0.0524    0.5536
Pt    0.3045    0.2085    0.6001
Pt    0.2584    0.0081    0.5286
Pt    0.3038    0.0079    0.5284
Pt    0.3039    0.2118    0.5531
Pt    0.4827    0.2567    0.6005
Pt    0.3266    0.2565    0.5780
Pt    0.4369    0.2118    0.6003
Pt    0.3029    0.0546    0.5294
Pt    0.3037    0.0523    0.5764
Pt    0.3037    0.0528    0.6200
Pt    0.3053    0.0989    0.5308
Pt    0.3028    0.0989    0.5759
Pt    0.3051    0.1426    0.5288
Pt    0.3052    0.1422    0.5757
Pt    0.3038    0.1871    0.5313
Pt    0.3036    0.1876    0.5767
Pt    0.3019    0.1869    0.6225
Pt    0.3032    0.2341    0.5305
Pt    0.3048    0.2338    0.5776
Pt    0.3043    0.2340    0.6219
Pt    0.4372    0.2107    0.5542
Pt    0.4371    0.1649    0.5989
Pt    0.3512    0.0557    0.5288
Pt    0.3508    0.0513    0.5773
Pt    0.3489    0.0987    0.5747
Pt    0.3491    0.1871    0.5316
Pt    0.3489    0.1888    0.5763
Pt    0.3491    0.2340    0.5294
Pt    0.3483    0.2335    0.5757
Pt    0.4379    0.1662    0.5551
Pt    0.3934    0.0549    0.5299
Pt    0.3946    0.0526    0.5788
Pt    0.3926    0.1895    0.5772
Pt    0.3932    0.2337    0.5303
Pt    0.3934    0.2349    0.5771
Pt    0.4390    0.1204    0.5559
Pt    0.4393    0.0765    0.5994
Pt    0.4362    0.0777    0.5545
Pt    0.4391    0.0545    0.5305
Pt    0.4386    0.0524    0.5765
Pt    0.4376    0.0544    0.6197
Pt    0.4379    0.1002    0.5319
Pt    0.4420    0.1006    0.5794
Pt    0.4372    0.1428    0.5324
Pt    0.4388    0.1434    0.5765
Pt    0.4361    0.1873    0.5304
Pt    0.4380    0.1886    0.5778
Pt    0.4385    0.1880    0.6232
Pt    0.4396    0.2341    0.5317
Pt    0.4360    0.2345    0.5770
Pt    0.4357    0.0295    0.6008
Pt    0.4389    0.0298    0.5538
Pt    0.4843    0.2563    0.5543
Pt    0.4846    0.0530    0.5317
Pt    0.4853    0.0531    0.5763
Pt    0.4866    0.0538    0.6215
Pt    0.4852    0.0982    0.5318
Pt    0.4842    0.0995    0.5778
Pt    0.4868    0.1423    0.5324
Pt    0.4866    0.1428    0.5789
Pt    0.4834    0.1883    0.5316
Pt    0.4846    0.1891    0.5775
Pt    0.4830    0.2321    0.5308
Pt    0.4828    0.2351    0.5777
Pt    0.4822    0.2343    0.6219
Pt    0.3026    0.0291    0.5534
Pt    0.3021    0.0295    0.5970
Pt    0.3038    0.0756    0.5534
Pt    0.3019    0.0776    0.5984
Pt    0.3044    0.1216    0.5525
Pt    0.3039    0.1634    0.5516
Pt    0.2576    0.0524    0.5298
Pt    0.5069    0.2337    0.5548
Pt    0.5073    0.1881    0.5083
Pt    0.3932    0.2101    0.5074
Pt    0.4360    0.1208    0.5081
Pt    0.5064    0.0291    0.5770
Pt    0.5041    0.2093    0.6225
Pt    0.4379    0.0774    0.5075
Pt    0.4612    0.2568    0.5767
Pt    0.3944    0.2561    0.5080
Pt    0.2794    0.2565    0.6209
Pt    0.3252    0.2340    0.5077
Pt    0.4388    0.2561    0.5548
Pt    0.4842    0.1668    0.5100
Pt    0.3707    0.0073    0.5078
Pt    0.2804    0.1432    0.5079
Pt    0.4606    0.0072    0.5078
Pt    0.3044    0.1649    0.5075
Pt    0.4384    0.1647    0.5077
Pt    0.3252    0.0554    0.5079
Pt    0.4852    0.0311    0.5083
Pt    0.4153    0.0537    0.5074
Pt    0.4381    0.2346    0.7570
Pt    0.3698    0.0084    0.7340
Pt    0.2602    0.1627    0.7346
Pt    0.2790    0.0527    0.6451
Pt    0.2805    0.0523    0.6867
Pt    0.2820    0.0516    0.7331
Pt    0.2790    0.0972    0.6880
Pt    0.2826    0.0990    0.7338
Pt    0.2833    0.1412    0.7336
Pt    0.2803    0.1876    0.6437
Pt    0.2813    0.1873    0.6879
Pt    0.2816    0.1861    0.7335
Pt    0.2799    0.2351    0.6445
Pt    0.2808    0.2332    0.6893
Pt    0.2818    0.2321    0.7328
Pt    0.4846    0.2106    0.7342
Pt    0.4825    0.2107    0.6879
Pt    0.4821    0.2110    0.6441
Pt    0.3272    0.0529    0.6425
Pt    0.3276    0.0541    0.6882
Pt    0.3255    0.0547    0.7336
Pt    0.3276    0.0991    0.6885
Pt    0.3280    0.0980    0.7348
Pt    0.3265    0.1418    0.6860
Pt    0.3270    0.1874    0.6423
Pt    0.3258    0.1859    0.6864
Pt    0.3271    0.1862    0.7324
Pt    0.3271    0.2335    0.6869
Pt    0.3265    0.2322    0.7331
Pt    0.4844    0.1659    0.7348
Pt    0.3731    0.0518    0.6886
Pt    0.3722    0.0538    0.7343
Pt    0.3736    0.1877    0.6879
Pt    0.3723    0.1878    0.7321
Pt    0.3685    0.2345    0.6848
Pt    0.3696    0.2339    0.7347
Pt    0.4824    0.1647    0.6872
Pt    0.4860    0.1196    0.7334
Pt    0.4145    0.0486    0.6860
Pt    0.4145    0.0531    0.7331
Pt    0.4163    0.0981    0.6893
Pt    0.4174    0.1884    0.6879
Pt    0.4162    0.1847    0.7345
Pt    0.4157    0.2354    0.6858
Pt    0.4161    0.2335    0.7326
Pt    0.4843    0.1197    0.6879
Pt    0.4832    0.0760    0.7353
Pt    0.4835    0.0777    0.6878
Pt    0.4619    0.0546    0.6419
Pt    0.4608    0.0535    0.6898
Pt    0.4601    0.0527    0.7333
Pt    0.4612    0.0996    0.6866
Pt    0.4601    0.1003    0.7349
Pt    0.4612    0.1411    0.6854
Pt    0.4615    0.1423    0.7341
Pt    0.4604    0.1890    0.6462
Pt    0.4604    0.1882    0.6873
Pt    0.4615    0.1869    0.7350
Pt    0.4586    0.2335    0.6432
Pt    0.4620    0.2359    0.6890
Pt    0.4603    0.2337    0.7341
Pt    0.4851    0.0297    0.7335
Pt    0.4843    0.0312    0.6884
Pt    0.4836    0.0308    0.6435
Pt    0.2580    0.0285    0.7332
Pt    0.4846    0.2317    0.7566
Pt    0.2580    0.2110    0.6883
Pt    0.2578    0.0740    0.6886
Pt    0.2584    0.1866    0.7109
Pt    0.3944    0.2329    0.7560
Pt    0.4855    0.0071    0.6657
Pt    0.3052    0.2569    0.7338
Pt    0.2804    0.2553    0.7124
Pt    0.2591    0.0276    0.6867
Pt    0.2574    0.1857    0.6650
Pt    0.3271    0.0097    0.6430
Pt    0.2819    0.0289    0.6663
Pt    0.2806    0.0301    0.7100
Pt    0.2796    0.0753    0.6663
Pt    0.2809    0.0740    0.7104
Pt    0.2809    0.1195    0.7101
Pt    0.2821    0.1639    0.7105
Pt    0.2803    0.2101    0.6671
Pt    0.2817    0.2091    0.7109
Pt    0.4612    0.0310    0.7570
Pt    0.4840    0.0074    0.7566
Pt    0.3284    0.0318    0.6654
Pt    0.3268    0.0299    0.7113
Pt    0.3266    0.0748    0.6662
Pt    0.3271    0.0767    0.7111
Pt    0.3286    0.1197    0.7103
Pt    0.3261    0.1643    0.6638
Pt    0.3272    0.1631    0.7094
Pt    0.3278    0.2114    0.6654
Pt    0.3274    0.2090    0.7099
Pt    0.4158    0.2570    0.7101
Pt    0.3494    0.1876    0.7567
Pt    0.3702    0.0300    0.7105
Pt    0.3724    0.0775    0.7099
Pt    0.3721    0.2115    0.7092
Pt    0.4155    0.0773    0.7562
Pt    0.4152    0.0298    0.7089
Pt    0.4186    0.0760    0.6659
Pt    0.4158    0.0756    0.7099
Pt    0.4169    0.2100    0.7102
Pt    0.2592    0.2094    0.7327
Pt    0.4611    0.0306    0.6658
Pt    0.4616    0.0306    0.7112
Pt    0.4610    0.0772    0.6648
Pt    0.4611    0.0761    0.7125
Pt    0.4627    0.1206    0.7113
Pt    0.4623    0.1650    0.7120
Pt    0.4597    0.2125    0.6665
Pt    0.4607    0.2110    0.7109
Pt    0.3716    0.2562    0.7559
Pt    0.4848    0.1416    0.7561
Pt    0.4372    0.0276    0.6881
Pt    0.4842    0.0077    0.7113
Pt    0.5070    0.0074    0.6899
Pt    0.4371    0.0308    0.6427
Pt    0.3021    0.2567    0.6878
Pt    0.5068    0.1657    0.7104
Pt    0.3052    0.0072    0.6676
Pt    0.4166    0.2108    0.7551
Pt    0.2580    0.2324    0.7567
Pt    0.5070    0.1884    0.7340
Pt    0.4391    0.0763    0.6884
Pt    0.2582    0.1209    0.7338
Pt    0.3029    0.0526    0.6649
Pt    0.3051    0.0524    0.7104
Pt    0.3037    0.0980    0.7110
Pt    0.3043    0.1422    0.7089
Pt    0.3046    0.1869    0.6637
Pt    0.3042    0.1849    0.7101
Pt    0.3040    0.2333    0.6664
Pt    0.3044    0.2346    0.7109
Pt    0.4391    0.2104    0.7343
Pt    0.3491    0.0529    0.7098
Pt    0.3479    0.1881    0.6639
Pt    0.3502    0.1856    0.7096
Pt    0.3490    0.2339    0.7110
Pt    0.4383    0.2111    0.6882
Pt    0.3922    0.0516    0.7103
Pt    0.3956    0.1872    0.7100
Pt    0.3934    0.2344    0.7073
Pt    0.4346    0.2127    0.6457
Pt    0.4382    0.1630    0.7350
Pt    0.4384    0.0515    0.6645
Pt    0.4361    0.0532    0.7098
Pt    0.4374    0.1011    0.6642
Pt    0.4376    0.0989    0.7112
Pt    0.4397    0.1430    0.7107
Pt    0.4369    0.1871    0.6660
Pt    0.4381    0.1886    0.7113
Pt    0.4374    0.2363    0.6652
Pt    0.4375    0.2339    0.7094
Pt    0.4401    0.1649    0.6883
Pt    0.4374    0.1210    0.6893
Pt    0.4824    0.0557    0.6654
Pt    0.4844    0.0543    0.7110
Pt    0.4851    0.0985    0.7112
Pt    0.4845    0.1435    0.7097
Pt    0.4854    0.1866    0.6650
Pt    0.4845    0.1888    0.7118
Pt    0.4834    0.2340    0.6654
Pt    0.4838    0.2323    0.7121
Pt    0.3049    0.0298    0.6425
Pt    0.3050    0.0308    0.6889
Pt    0.3045    0.0302    0.7329
Pt    0.3016    0.0745    0.6435
Pt    0.3038    0.0771    0.6870
Pt    0.3042    0.0766    0.7349
Pt    0.3040    0.1188    0.6878
Pt    0.3083    0.1219    0.7333
Pt    0.3029    0.1632    0.6861
Pt    0.3049    0.1627    0.7339
Pt    0.3043    0.2110    0.6434
Pt    0.3045    0.2102    0.6888
Pt    0.3039    0.2090    0.7317
Pt    0.2598    0.1411    0.7074
Pt    0.3267    0.2079    0.7564
Pt    0.4396    0.0766    0.6436
Pt    0.3518    0.0270    0.6862
Pt    0.3481    0.0312    0.7345
Pt    0.3494    0.0753    0.6879
Pt    0.3511    0.0767    0.7336
Pt    0.3488    0.1653    0.6859
Pt    0.3495    0.2095    0.6884
Pt    0.3496    0.2095    0.7327
Pt    0.4377    0.0297    0.7318
Pt    0.4370    0.0765    0.7330
Pt    0.3922    0.0280    0.7345
Pt    0.3950    0.0754    0.6887
Pt    0.3939    0.0769    0.7323
Pt    0.3951    0.2100    0.6867
Pt    0.3948    0.2090    0.7322
Pt    0.4839    0.2562    0.7341
Pt    0.5062    0.1430    0.6875
Pt    0.2582    0.1852    0.7568
Pt    0.5066    0.1862    0.6885
Pt    0.3930    0.2565    0.7324
Pt    0.2580    0.2354    0.6672
Pt    0.5062    0.2100    0.6655
Pt    0.3720    0.2099    0.7562
Pt    0.2802    0.0291    0.7562
Pt    0.3272    0.2569    0.6664
Pt    0.3478    0.2561    0.7331
Pt    0.5071    0.0758    0.7122
Pt    0.5058    0.2341    0.6430
Pt    0.2578    0.2328    0.7118
Pt    0.5050    0.0760    0.6651
Pt    0.3719    0.0769    0.7560
Pt    0.5069    0.0319    0.6670
Pt    0.2590    0.0976    0.7122
Pt    0.3041    0.1861    0.7565
Pt    0.2593    0.1646    0.6872
Pt    0.2574    0.0744    0.7332
Pt    0.4378    0.0528    0.7554
Pt    0.2805    0.2559    0.7552
Pt    0.4158    0.0304    0.7573
Pt    0.5068    0.0078    0.7340
Pt    0.4869    0.2566    0.6891
Pt    0.4820    0.2569    0.6445
Pt    0.2589    0.0975    0.7572
Pt    0.3044    0.2567    0.6435
Pt    0.4146    0.2563    0.7559
Pt    0.5066    0.0309    0.7109
Pt    0.5069    0.0087    0.6443
Pt    0.3269    0.2565    0.7097
Pt    0.3044    0.0527    0.7570
Pt    0.2816    0.0755    0.7569
Pt    0.3024    0.2321    0.7569
Pt    0.3262    0.2561    0.7566
Pt    0.3952    0.0536    0.7572
Pt    0.2808    0.2093    0.7559
Pt    0.4594    0.1634    0.7565
Pt    0.2588    0.1424    0.7573
Pt    0.2582    0.0544    0.8048
Pt    0.3247    0.0090    0.8279
Pt    0.2821    0.1204    0.7582
Pt    0.2819    0.0522    0.7804
Pt    0.2792    0.0540    0.8272
Pt    0.2799    0.0536    0.8732
Pt    0.2803    0.0990    0.7807
Pt    0.2805    0.1002    0.8269
Pt    0.2814    0.1429    0.7836
Pt    0.2812    0.1851    0.7812
Pt    0.2799    0.1868    0.8288
Pt    0.2812    0.1857    0.8693
Pt    0.2803    0.2323    0.7811
Pt    0.2810    0.2322    0.8278
Pt    0.2813    0.2332    0.8705
Pt    0.4826    0.2107    0.8724
Pt    0.4828    0.2096    0.8280
Pt    0.4831    0.2110    0.7810
Pt    0.3271    0.0536    0.7814
Pt    0.3286    0.0527    0.8275
Pt    0.3275    0.0549    0.8711
Pt    0.3267    0.0983    0.7806
Pt    0.3278    0.0978    0.8255
Pt    0.3274    0.1408    0.8292
Pt    0.3264    0.1870    0.7808
Pt    0.3277    0.1876    0.8272
Pt    0.3286    0.1882    0.8714
Pt    0.3251    0.2322    0.7804
Pt    0.3283    0.2340    0.8263
Pt    0.4861    0.1649    0.8270
Pt    0.3706    0.0528    0.7816
Pt    0.3730    0.0505    0.8275
Pt    0.3714    0.1871    0.7800
Pt    0.3717    0.1866    0.8242
Pt    0.3701    0.2330    0.7786
Pt    0.3682    0.2354    0.8264
Pt    0.4841    0.1646    0.7798
Pt    0.4843    0.1200    0.8267
Pt    0.4168    0.0529    0.7799
Pt    0.4149    0.0506    0.8282
Pt    0.4135    0.0975    0.8281
Pt    0.4144    0.1856    0.7785
Pt    0.4161    0.1897    0.8284
Pt    0.4148    0.2334    0.7800
Pt    0.4143    0.2322    0.8268
Pt    0.4840    0.1209    0.7800
Pt    0.4846    0.0761    0.8265
Pt    0.4841    0.0757    0.7807
Pt    0.4610    0.0522    0.7804
Pt    0.4621    0.0528    0.8270
Pt    0.4611    0.0546    0.8708
Pt    0.4613    0.0981    0.7813
Pt    0.4609    0.0979    0.8265
Pt    0.4584    0.1420    0.7820
Pt    0.4620    0.1440    0.8284
Pt    0.4595    0.1879    0.7803
Pt    0.4614    0.1865    0.8278
Pt    0.4589    0.1887    0.8731
Pt    0.4625    0.2352    0.7812
Pt    0.4597    0.2345    0.8280
Pt    0.4590    0.2357    0.8717
Pt    0.4829    0.0297    0.8718
Pt    0.4841    0.0315    0.8269
Pt    0.4833    0.0289    0.7812
Pt    0.3706    0.0076    0.7820
Pt    0.4362    0.2340    0.8019
Pt    0.3026    0.0076    0.8495
Pt    0.3264    0.0078    0.8711
Pt    0.4391    0.1873    0.8501
Pt    0.3267    0.0761    0.7579
Pt    0.4376    0.1850    0.8026
Pt    0.4362    0.2337    0.8510
Pt    0.3475    0.2554    0.7787
Pt    0.4366    0.1430    0.8051
Pt    0.4373    0.0992    0.8501
Pt    0.4386    0.0983    0.8027
Pt    0.4382    0.0306    0.7805
Pt    0.2793    0.0300    0.8042
Pt    0.2807    0.0307    0.8493
Pt    0.3483    0.0076    0.8051
Pt    0.2794    0.0768    0.8043
Pt    0.2802    0.0772    0.8507
Pt    0.4160    0.0086    0.7792
Pt    0.2788    0.1210    0.8049
Pt    0.3907    0.2113    0.8281
Pt    0.2800    0.1633    0.8085
Pt    0.3938    0.2105    0.7799
Pt    0.2811    0.2084    0.8046
Pt    0.2808    0.2085    0.8499
Pt    0.3929    0.0751    0.8275
Pt    0.4364    0.2568    0.8260
Pt    0.2796    0.0088    0.7803
Pt    0.3941    0.0761    0.7797
Pt    0.3261    0.0314    0.8037
Pt    0.3272    0.0312    0.8500
Pt    0.3944    0.0297    0.7813
Pt    0.3270    0.0757    0.8033
Pt    0.3254    0.0771    0.8485
Pt    0.3271    0.1208    0.8041
Pt    0.3714    0.0306    0.7586
Pt    0.3262    0.1643    0.8046
Pt    0.3278    0.1649    0.8491
Pt    0.4386    0.1882    0.7581
Pt    0.3269    0.2095    0.8022
Pt    0.3305    0.2108    0.8503
Pt    0.3501    0.2091    0.8254
Pt    0.2788    0.0079    0.8268
Pt    0.3072    0.2560    0.8701
Pt    0.3485    0.2093    0.7800
Pt    0.3717    0.0305    0.8042
Pt    0.3499    0.1637    0.8269
Pt    0.3721    0.0753    0.8038
Pt    0.3512    0.0749    0.8281
Pt    0.3714    0.2103    0.8025
Pt    0.3499    0.0779    0.7798
Pt    0.3939    0.2550    0.7813
Pt    0.3503    0.0281    0.8297
Pt    0.4160    0.0288    0.8033
Pt    0.3488    0.0304    0.7812
Pt    0.4155    0.0774    0.8040
Pt    0.4143    0.0757    0.8493
Pt    0.2581    0.1203    0.7809
Pt    0.4164    0.2097    0.8037
Pt    0.2577    0.2555    0.7796
Pt    0.2590    0.0761    0.7816
Pt    0.3276    0.0073    0.7812
Pt    0.4619    0.0297    0.8039
Pt    0.4589    0.0298    0.8503
Pt    0.3044    0.2080    0.8709
Pt    0.4605    0.0756    0.8035
Pt    0.4625    0.0782    0.8506
Pt    0.3063    0.2096    0.8268
Pt    0.4603    0.1198    0.8048
Pt    0.3027    0.2088    0.7795
Pt    0.4619    0.1645    0.8039
Pt    0.3040    0.1625    0.8285
Pt    0.4604    0.2103    0.8048
Pt    0.4605    0.2109    0.8500
Pt    0.3051    0.1644    0.7813
Pt    0.4852    0.2570    0.7825
Pt    0.2579    0.2090    0.7801
Pt    0.3047    0.1193    0.8277
Pt    0.4387    0.0753    0.7803
Pt    0.2828    0.1622    0.7576
Pt    0.3033    0.1205    0.7824
Pt    0.2575    0.1437    0.8039
Pt    0.4388    0.0539    0.8485
Pt    0.3039    0.0794    0.8707
Pt    0.4849    0.0071    0.8489
Pt    0.3031    0.0770    0.8265
Pt    0.3268    0.0288    0.7577
Pt    0.3037    0.0752    0.7803
Pt    0.3052    0.0986    0.7578
Pt    0.4855    0.0532    0.7576
Pt    0.3043    0.0306    0.8735
Pt    0.2575    0.0313    0.7794
Pt    0.4390    0.0976    0.7584
Pt    0.4603    0.0075    0.7795
Pt    0.4834    0.1880    0.7584
Pt    0.4375    0.2102    0.8702
Pt    0.3011    0.0313    0.8268
Pt    0.3023    0.0530    0.8048
Pt    0.3029    0.0543    0.8483
Pt    0.3031    0.0301    0.7802
Pt    0.3040    0.0988    0.8034
Pt    0.4862    0.2336    0.8474
Pt    0.3056    0.1416    0.8046
Pt    0.4838    0.2332    0.8051
Pt    0.3036    0.1854    0.8051
Pt    0.3045    0.1865    0.8488
Pt    0.4853    0.1863    0.8507
Pt    0.3054    0.2310    0.8034
Pt    0.3044    0.2329    0.8483
Pt    0.4387    0.2103    0.8265
Pt    0.4372    0.2102    0.7800
Pt    0.4835    0.1884    0.8036
Pt    0.3504    0.0533    0.8047
Pt    0.4838    0.1417    0.8043
Pt    0.3481    0.1859    0.8032
Pt    0.3530    0.1874    0.8484
Pt    0.4838    0.0986    0.8018
Pt    0.3500    0.2346    0.8026
Pt    0.4371    0.1658    0.8272
Pt    0.4343    0.1629    0.7787
Pt    0.4839    0.0541    0.8503
Pt    0.3950    0.0532    0.8033
Pt    0.4850    0.0520    0.8035
Pt    0.3945    0.1884    0.8038
Pt    0.4377    0.0301    0.8259
Pt    0.3918    0.2337    0.8042
Pt    0.4385    0.1199    0.8277
Pt    0.4375    0.0762    0.8709
Pt    0.4383    0.0757    0.8272
Pt    0.4336    0.0312    0.8684
Pt    0.4383    0.0536    0.8046
Pt    0.4606    0.2564    0.8053
Pt    0.3932    0.2566    0.8279
Pt    0.4824    0.2552    0.8695
Pt    0.2580    0.1650    0.7808
Pt    0.5067    0.1654    0.8044
Pt    0.3065    0.1410    0.7592
Pt    0.2576    0.2087    0.8273
Pt    0.2593    0.2324    0.8042
Pt    0.3491    0.0539    0.7576
Pt    0.5073    0.2111    0.8050
Pt    0.2582    0.2559    0.8707
Pt    0.3280    0.2555    0.8490
Pt    0.3028    0.2541    0.7797
Pt    0.2796    0.2565    0.8032
Pt    0.5059    0.1876    0.7821
Pt    0.3034    0.2555    0.8253
Pt    0.2583    0.2566    0.8275
Pt    0.2820    0.2551    0.8487
Pt    0.5062    0.2333    0.8725
Pt    0.5056    0.0760    0.8494
Pt    0.5067    0.2313    0.7801
Pt    0.5067    0.2088    0.7580
Pt    0.5069    0.0294    0.8031
Pt    0.5067    0.2341    0.8257
Pt    0.5067    0.0768    0.8025
Pt    0.2576    0.1865    0.8049
Pt    0.3935    0.1865    0.7577
Pt    0.4615    0.2123    0.7574
Pt    0.4588    0.1214    0.7593
Pt    0.3270    0.1658    0.7579
Pt    0.4628    0.2556    0.7586
Pt    0.2585    0.0526    0.7584
Pt    0.4610    0.0755    0.7574
Pt    0.4846    0.0995    0.7584
Pt    0.3480    0.2313    0.7574
Pt    0.5064    0.1647    0.7574
Pt    0.3932    0.0075    0.9862
Pt    0.3490    0.0086    0.9836
Pt    0.2792    0.0549    0.9175
Pt    0.2802    0.0532    0.9608
Pt    0.2825    0.1002    0.9595
Pt    0.2811    0.1456    0.9601
Pt    0.2837    0.1880    0.9133
Pt    0.2805    0.1888    0.9598
Pt    0.2803    0.2328    0.9142
Pt    0.2821    0.2356    0.9609
Pt    0.4855    0.2111    0.9611
Pt    0.4847    0.2095    0.9153
Pt    0.3264    0.0544    0.9147
Pt    0.3256    0.0533    0.9609
Pt    0.3258    0.0980    0.9161
Pt    0.3285    0.0991    0.9612
Pt    0.3304    0.1431    0.9603
Pt    0.3286    0.1893    0.9151
Pt    0.3268    0.1891    0.9620
Pt    0.3276    0.2350    0.9130
Pt    0.3274    0.2340    0.9602
Pt    0.4870    0.1648    0.9606
Pt    0.3697    0.0525    0.9604
Pt    0.3737    0.1874    0.9618
Pt    0.3730    0.2357    0.9586
Pt    0.4825    0.1182    0.9597
Pt    0.4143    0.0541    0.9593
Pt    0.4133    0.1908    0.9139
Pt    0.4150    0.1883    0.9612
Pt    0.4170    0.2345    0.9605
Pt    0.4822    0.0759    0.9604
Pt    0.4840    0.0774    0.9138
Pt    0.4586    0.0525    0.9148
Pt    0.4611    0.0529    0.9590
Pt    0.4608    0.0996    0.9612
Pt    0.4616    0.1420    0.9599
Pt    0.4606    0.1884    0.9146
Pt    0.4622    0.1883    0.9621
Pt    0.4605    0.2353    0.9161
Pt    0.4611    0.2345    0.9606
Pt    0.4838    0.0301    0.9591
Pt    0.4819    0.0306    0.9153
Pt    0.2589    0.1432    0.9826
Pt    0.2586    0.1879    0.9359
Pt    0.2585    0.2335    0.9851
Pt    0.2582    0.0995    0.9826
Pt    0.4605    0.0071    0.9603
Pt    0.2585    0.0300    0.0072
Pt    0.4383    0.0294    0.0062
Pt    0.4620    0.1880    0.0070
Pt    0.2810    0.0306    0.8943
Pt    0.2815    0.0304    0.9398
Pt    0.2819    0.0299    0.9850
Pt    0.2807    0.0769    0.8939
Pt    0.2799    0.0766    0.9384
Pt    0.2797    0.0767    0.9818
Pt    0.2800    0.1204    0.9835
Pt    0.2793    0.1646    0.9368
Pt    0.2821    0.1668    0.9837
Pt    0.2817    0.2097    0.8910
Pt    0.2813    0.2114    0.9375
Pt    0.2802    0.2108    0.9836
Pt    0.2579    0.2106    0.9614
Pt    0.2578    0.1887    0.9833
Pt    0.3261    0.0086    0.9154
Pt    0.3295    0.0317    0.8937
Pt    0.3265    0.0302    0.9379
Pt    0.3272    0.0318    0.9854
Pt    0.3254    0.0773    0.8923
Pt    0.3270    0.0768    0.9386
Pt    0.3281    0.0771    0.9840
Pt    0.3263    0.1214    0.9364
Pt    0.3279    0.1213    0.9849
Pt    0.3272    0.1658    0.9372
Pt    0.3307    0.1628    0.9842
Pt    0.3272    0.2121    0.8926
Pt    0.3269    0.2116    0.9369
Pt    0.3275    0.2103    0.9844
Pt    0.2585    0.2089    0.9139
Pt    0.4624    0.0990    0.0066
Pt    0.3719    0.0319    0.9844
Pt    0.3723    0.0775    0.9368
Pt    0.3719    0.2127    0.9347
Pt    0.3724    0.2092    0.9838
Pt    0.2581    0.2332    0.9384
Pt    0.4848    0.2105    0.0067
Pt    0.4126    0.0302    0.9374
Pt    0.4139    0.0298    0.9841
Pt    0.4152    0.0779    0.9384
Pt    0.4146    0.0765    0.9850
Pt    0.4164    0.1657    0.9403
Pt    0.4171    0.2117    0.9379
Pt    0.4162    0.2117    0.9836
Pt    0.2817    0.1439    0.0058
Pt    0.3285    0.2343    0.0062
Pt    0.4586    0.0303    0.8914
Pt    0.4595    0.0291    0.9367
Pt    0.4603    0.0286    0.9838
Pt    0.4602    0.0754    0.8947
Pt    0.4625    0.0765    0.9373
Pt    0.4583    0.0743    0.9827
Pt    0.4601    0.1216    0.9346
Pt    0.4602    0.1213    0.9839
Pt    0.4607    0.1654    0.9396
Pt    0.4607    0.1641    0.9833
Pt    0.4600    0.2128    0.8928
Pt    0.4621    0.2112    0.9378
Pt    0.4629    0.2122    0.9835
Pt    0.4611    0.2340    0.0065
Pt    0.2581    0.2565    0.9621
Pt    0.4395    0.2115    0.0069
Pt    0.4607    0.0526    0.0073
Pt    0.2601    0.1220    0.9590
Pt    0.2577    0.1858    0.8922
Pt    0.3041    0.0071    0.8933
Pt    0.2577    0.0789    0.9163
Pt    0.2580    0.2328    0.8917
Pt    0.2579    0.0515    0.9839
Pt    0.3926    0.2118    0.9585
Pt    0.2818    0.2561    0.8934
Pt    0.3498    0.2111    0.9596
Pt    0.3906    0.0758    0.9615
Pt    0.4367    0.0071    0.9370
Pt    0.3927    0.0302    0.9607
Pt    0.5065    0.0753    0.9856
Pt    0.3537    0.0784    0.9615
Pt    0.5058    0.1864    0.9150
Pt    0.5067    0.2098    0.9386
Pt    0.4393    0.2123    0.9621
Pt    0.3037    0.0548    0.8931
Pt    0.3045    0.0541    0.9378
Pt    0.3050    0.0557    0.9842
Pt    0.3027    0.1009    0.9366
Pt    0.3045    0.0985    0.9830
Pt    0.3048    0.1443    0.9388
Pt    0.3057    0.1424    0.9836
Pt    0.3050    0.1843    0.8927
Pt    0.3044    0.1868    0.9384
Pt    0.3040    0.1897    0.9835
Pt    0.3047    0.2326    0.8915
Pt    0.3046    0.2340    0.9371
Pt    0.3040    0.2335    0.9843
Pt    0.4384    0.2118    0.9160
Pt    0.4391    0.1639    0.9628
Pt    0.3488    0.0541    0.9367
Pt    0.3488    0.0549    0.9829
Pt    0.3505    0.0998    0.9388
Pt    0.3505    0.1884    0.9396
Pt    0.3503    0.1879    0.9817
Pt    0.3488    0.2350    0.9357
Pt    0.3507    0.2322    0.9827
Pt    0.4369    0.1677    0.9162
Pt    0.3936    0.0536    0.9365
Pt    0.3928    0.0537    0.9841
Pt    0.3945    0.1877    0.9370
Pt    0.3953    0.2330    0.9343
Pt    0.3936    0.2328    0.9828
Pt    0.4367    0.1197    0.9599
Pt    0.4364    0.0761    0.9614
Pt    0.4372    0.0763    0.9153
Pt    0.4371    0.0524    0.8907
Pt    0.4371    0.0536    0.9379
Pt    0.4364    0.0522    0.9830
Pt    0.4399    0.0979    0.9381
Pt    0.4364    0.0989    0.9826
Pt    0.4383    0.1433    0.9400
Pt    0.4357    0.1419    0.9844
Pt    0.4375    0.1885    0.8939
Pt    0.4392    0.1896    0.9388
Pt    0.4384    0.1899    0.9833
Pt    0.4382    0.2354    0.9368
Pt    0.4400    0.2348    0.9840
Pt    0.4366    0.0301    0.9602
Pt    0.4351    0.0302    0.9157
Pt    0.3288    0.1872    0.0059
Pt    0.4825    0.0546    0.8937
Pt    0.4840    0.0544    0.9363
Pt    0.4828    0.0525    0.9821
Pt    0.4837    0.0995    0.9356
Pt    0.4850    0.0970    0.9841
Pt    0.4845    0.1423    0.9364
Pt    0.4843    0.1427    0.9829
Pt    0.4838    0.1886    0.9387
Pt    0.4857    0.1856    0.9841
Pt    0.4841    0.2349    0.8949
Pt    0.4841    0.2345    0.9387
Pt    0.4860    0.2322    0.9848
Pt    0.3038    0.0322    0.9154
Pt    0.3046    0.0298    0.9615
Pt    0.3030    0.0769    0.9155
Pt    0.3045    0.0771    0.9601
Pt    0.3065    0.1215    0.9598
Pt    0.3067    0.1660    0.9619
Pt    0.3051    0.2109    0.9144
Pt    0.3043    0.2112    0.9598
Pt    0.2586    0.1237    0.0070
Pt    0.3496    0.0761    0.9143
Pt    0.3489    0.0302    0.9607
Pt    0.5065    0.2336    0.9169
Pt    0.4836    0.0288    0.0053
Pt    0.4373    0.1198    0.0071
Pt    0.5070    0.0303    0.9829
Pt    0.2808    0.0539    0.0061
Pt    0.5058    0.2087    0.8931
Pt    0.3500    0.2096    0.0056
Pt    0.4850    0.0077    0.9829
Pt    0.3711    0.2320    0.0067
Pt    0.5055    0.0299    0.8942
Pt    0.3048    0.2113    0.0070
Pt    0.4174    0.1889    0.0061
Pt    0.3046    0.2561    0.9140
Pt    0.3049    0.2568    0.9588
Pt    0.4369    0.1658    0.0053
Pt    0.3269    0.2567    0.9844
Pt    0.3731    0.2563    0.9828
Pt    0.3052    0.1647    0.0058
Pt    0.2811    0.0083    0.9163
Pt    0.4379    0.0781    0.0061
Pt    0.3497    0.2561    0.9613
Pt    0.3267    0.0542    0.0068
Pt    0.3516    0.0314    0.0072
Pt    0.3941    0.2099    0.0067
Pt    0.4830    0.1211    0.0063
Pt    0.2798    0.0982    0.0060
Pt    0.4145    0.0540    0.0066
Pt    0.3047    0.1219    0.0065
Pt    0.2574    0.2567    0.9165
Pt    0.4837    0.4820    0.0987
Pt    0.2800    0.2808    0.0539
Pt    0.2801    0.2805    0.0983
Pt    0.4857    0.4841    0.0540
Pt    0.2808    0.3261    0.0542
Pt    0.2771    0.3297    0.1001
Pt    0.4854    0.4388    0.1005
Pt    0.2792    0.3699    0.0533
Pt    0.4845    0.4395    0.0531
Pt    0.2810    0.4151    0.0533
Pt    0.4847    0.3943    0.0532
Pt    0.2797    0.4606    0.0535
Pt    0.2808    0.4604    0.0988
Pt    0.4857    0.3499    0.0534
Pt    0.2573    0.4844    0.1003
Pt    0.5068    0.2580    0.0306
Pt    0.4852    0.3051    0.1009
Pt    0.3278    0.2802    0.0546
Pt    0.3272    0.2799    0.0976
Pt    0.4865    0.3051    0.0539
Pt    0.3269    0.3253    0.0540
Pt    0.3272    0.3254    0.0999
Pt    0.4368    0.4820    0.0982
Pt    0.3280    0.3703    0.0516
Pt    0.4383    0.4845    0.0537
Pt    0.3251    0.4139    0.0546
Pt    0.3256    0.4160    0.0968
Pt    0.4394    0.4360    0.1013
Pt    0.3280    0.4598    0.0527
Pt    0.3263    0.4609    0.0989
Pt    0.4378    0.4376    0.0534
Pt    0.2576    0.3244    0.0304
Pt    0.4616    0.2582    0.0300
Pt    0.4381    0.3932    0.0542
Pt    0.3719    0.2812    0.0539
Pt    0.3718    0.3265    0.0546
Pt    0.4417    0.3515    0.1003
Pt    0.3726    0.4585    0.0523
Pt    0.4393    0.3508    0.0550
Pt    0.2584    0.4637    0.0751
Pt    0.4389    0.3036    0.0992
Pt    0.4170    0.2796    0.0556
Pt    0.4378    0.3037    0.0541
Pt    0.4163    0.3267    0.0531
Pt    0.4168    0.3262    0.1011
Pt    0.3917    0.4830    0.0550
Pt    0.4146    0.4602    0.0535
Pt    0.3950    0.4351    0.0531
Pt    0.5072    0.3047    0.0776
Pt    0.3959    0.3035    0.0536
Pt    0.4614    0.2807    0.0545
Pt    0.4596    0.2797    0.1000
Pt    0.3538    0.4828    0.0550
Pt    0.4610    0.3265    0.0552
Pt    0.4645    0.3299    0.1008
Pt    0.3503    0.4389    0.0983
Pt    0.4622    0.3723    0.0535
Pt    0.3494    0.4350    0.0523
Pt    0.4607    0.4154    0.0532
Pt    0.3506    0.3031    0.0555
Pt    0.4630    0.4608    0.0532
Pt    0.4605    0.4592    0.0998
Pt    0.3046    0.4838    0.0991
Pt    0.4389    0.5059    0.0758
Pt    0.2586    0.4142    0.0307
Pt    0.3040    0.4833    0.0533
Pt    0.3034    0.3034    0.0567
Pt    0.5073    0.2575    0.1215
Pt    0.3037    0.4367    0.0987
Pt    0.3037    0.2580    0.0533
Pt    0.2583    0.3480    0.0528
Pt    0.3052    0.4388    0.0537
Pt    0.4396    0.3037    0.0077
Pt    0.3037    0.3901    0.0520
Pt    0.4856    0.4587    0.1234
Pt    0.3043    0.3491    0.0541
Pt    0.2583    0.2801    0.1218
Pt    0.4852    0.4603    0.0777
Pt    0.3037    0.3024    0.0991
Pt    0.4847    0.4625    0.0290
Pt    0.4600    0.2573    0.1224
Pt    0.2815    0.3032    0.0307
Pt    0.2792    0.3050    0.0771
Pt    0.2803    0.3042    0.1216
Pt    0.2799    0.3480    0.0295
Pt    0.2788    0.3498    0.0764
Pt    0.2804    0.3907    0.0298
Pt    0.2807    0.4387    0.0313
Pt    0.2796    0.4372    0.0754
Pt    0.2796    0.4373    0.1202
Pt    0.2801    0.4830    0.0307
Pt    0.2805    0.4855    0.0766
Pt    0.2813    0.4836    0.1203
Pt    0.3260    0.3038    0.0309
Pt    0.3282    0.3045    0.0781
Pt    0.3263    0.3024    0.1215
Pt    0.3274    0.3469    0.0310
Pt    0.3284    0.3488    0.0761
Pt    0.3270    0.3944    0.0290
Pt    0.3273    0.3921    0.0779
Pt    0.3264    0.4358    0.0288
Pt    0.3279    0.4383    0.0750
Pt    0.3264    0.4376    0.1209
Pt    0.3276    0.4841    0.0311
Pt    0.3292    0.4822    0.0768
Pt    0.3282    0.4817    0.1224
Pt    0.3730    0.3042    0.0298
Pt    0.3749    0.3037    0.0803
Pt    0.3716    0.4362    0.0761
Pt    0.3724    0.4824    0.0297
Pt    0.4163    0.3034    0.0303
Pt    0.4166    0.3045    0.0772
Pt    0.4183    0.3484    0.0778
Pt    0.4155    0.4373    0.0290
Pt    0.4158    0.4387    0.0788
Pt    0.4154    0.4818    0.0305
Pt    0.4143    0.4823    0.0769
Pt    0.4626    0.3037    0.0315
Pt    0.4628    0.3039    0.0772
Pt    0.4606    0.3047    0.1215
Pt    0.4631    0.3486    0.0309
Pt    0.4629    0.3518    0.0774
Pt    0.4610    0.3927    0.0302
Pt    0.4607    0.3933    0.0770
Pt    0.4625    0.4374    0.0301
Pt    0.4607    0.4388    0.0771
Pt    0.4616    0.4360    0.1236
Pt    0.4612    0.4853    0.0304
Pt    0.4609    0.4835    0.0763
Pt    0.4597    0.4824    0.1219
Pt    0.4840    0.4162    0.0797
Pt    0.4846    0.4161    0.0306
Pt    0.4858    0.3729    0.0778
Pt    0.4867    0.3720    0.0308
Pt    0.3947    0.2576    0.0532
Pt    0.3260    0.3267    0.0078
Pt    0.4840    0.3265    0.0767
Pt    0.3706    0.2576    0.0280
Pt    0.4378    0.5068    0.0301
Pt    0.5065    0.3049    0.1214
Pt    0.4847    0.3258    0.0301
Pt    0.2575    0.3939    0.0539
Pt    0.3030    0.2807    0.0294
Pt    0.3041    0.2810    0.0761
Pt    0.3050    0.2804    0.1224
Pt    0.3036    0.3259    0.0319
Pt    0.3030    0.3288    0.0792
Pt    0.3043    0.3256    0.1199
Pt    0.3057    0.3693    0.0296
Pt    0.3035    0.3703    0.0767
Pt    0.3029    0.4153    0.0308
Pt    0.3025    0.4137    0.0751
Pt    0.3059    0.4593    0.0297
Pt    0.3046    0.4619    0.0762
Pt    0.3046    0.4589    0.1209
Pt    0.2575    0.4616    0.0298
Pt    0.3054    0.5047    0.0767
Pt    0.3041    0.5068    0.1218
Pt    0.3488    0.2804    0.0291
Pt    0.3517    0.2798    0.0783
Pt    0.3496    0.3254    0.0331
Pt    0.3505    0.3251    0.0773
Pt    0.3497    0.4151    0.0769
Pt    0.3502    0.4595    0.0301
Pt    0.3507    0.4596    0.0754
Pt    0.2585    0.4381    0.0528
Pt    0.4168    0.2581    0.0302
Pt    0.3936    0.2800    0.0291
Pt    0.3953    0.2821    0.0785
Pt    0.3946    0.3279    0.0759
Pt    0.3927    0.4583    0.0303
Pt    0.3927    0.4590    0.0761
Pt    0.4842    0.5069    0.0292
Pt    0.4390    0.2805    0.0316
Pt    0.4365    0.2800    0.0797
Pt    0.4396    0.3267    0.0310
Pt    0.4416    0.3272    0.0790
Pt    0.4402    0.3273    0.1216
Pt    0.4380    0.3702    0.0301
Pt    0.4372    0.3731    0.0774
Pt    0.4364    0.4160    0.0312
Pt    0.4400    0.4159    0.0783
Pt    0.4387    0.4602    0.0288
Pt    0.4384    0.4603    0.0758
Pt    0.4374    0.4587    0.1212
Pt    0.2818    0.5066    0.0521
Pt    0.3512    0.5059    0.0782
Pt    0.4605    0.5056    0.0984
Pt    0.4854    0.2808    0.0321
Pt    0.4838    0.2794    0.0779
Pt    0.4836    0.2810    0.1224
Pt    0.4161    0.2809    0.0074
Pt    0.3296    0.5052    0.0552
Pt    0.3055    0.4832    0.0088
Pt    0.4152    0.5057    0.0076
Pt    0.2585    0.3027    0.0078
Pt    0.5063    0.2794    0.0987
Pt    0.4857    0.5062    0.0770
Pt    0.4619    0.2800    0.0079
Pt    0.3938    0.5065    0.0299
Pt    0.5068    0.4842    0.0301
Pt    0.4833    0.5063    0.1217
Pt    0.5058    0.4826    0.1215
Pt    0.2800    0.4137    0.0074
Pt    0.2581    0.2805    0.0306
Pt    0.4158    0.3271    0.0098
Pt    0.3292    0.5057    0.0995
Pt    0.3054    0.5066    0.0295
Pt    0.4149    0.5062    0.0534
Pt    0.4852    0.4825    0.0076
Pt    0.3502    0.3061    0.0086
Pt    0.2813    0.4607    0.0082
Pt    0.2588    0.4378    0.0077
Pt    0.4853    0.3505    0.0075
Pt    0.2799    0.3262    0.0075
Pt    0.2801    0.2807    0.1435
Pt    0.2802    0.2810    0.1883
Pt    0.2810    0.2804    0.2335
Pt    0.2778    0.3278    0.1427
Pt    0.2803    0.3258    0.1878
Pt    0.2806    0.3278    0.2337
Pt    0.2805    0.3719    0.2348
Pt    0.2801    0.4148    0.1866
Pt    0.2820    0.4154    0.2352
Pt    0.2803    0.4600    0.1415
Pt    0.2805    0.4594    0.1872
Pt    0.2799    0.4585    0.2328
Pt    0.2577    0.4822    0.1889
Pt    0.4839    0.2574    0.1441
Pt    0.3259    0.4364    0.2573
Pt    0.3281    0.2800    0.1877
Pt    0.3266    0.2815    0.2341
Pt    0.3272    0.3241    0.1429
Pt    0.3255    0.3283    0.1882
Pt    0.3258    0.3276    0.2321
Pt    0.3258    0.3725    0.1850
Pt    0.3286    0.4149    0.1896
Pt    0.3264    0.4139    0.2346
Pt    0.3283    0.4592    0.1443
Pt    0.3256    0.4605    0.1874
Pt    0.3266    0.4601    0.2338
Pt    0.3041    0.2579    0.1881
Pt    0.3265    0.2575    0.2110
Pt    0.3265    0.2587    0.1658
Pt    0.3698    0.2805    0.1866
Pt    0.3713    0.2832    0.2341
Pt    0.3709    0.3297    0.1880
Pt    0.3720    0.3299    0.2328
Pt    0.3696    0.4605    0.1874
Pt    0.3720    0.4598    0.2344
Pt    0.2809    0.2571    0.1659
Pt    0.4138    0.2821    0.1882
Pt    0.4150    0.2801    0.2343
Pt    0.4182    0.3267    0.1880
Pt    0.4156    0.3285    0.2341
Pt    0.4140    0.4150    0.1894
Pt    0.4143    0.4629    0.1873
Pt    0.4138    0.4598    0.2322
Pt    0.3023    0.2576    0.2331
Pt    0.4160    0.5067    0.2344
Pt    0.4574    0.2819    0.1426
Pt    0.4598    0.2804    0.1907
Pt    0.4613    0.2788    0.2338
Pt    0.4625    0.3271    0.1432
Pt    0.4637    0.3265    0.1871
Pt    0.4605    0.3260    0.2350
Pt    0.4597    0.3740    0.1879
Pt    0.4624    0.3704    0.2336
Pt    0.4602    0.4162    0.1885
Pt    0.4605    0.4156    0.2359
Pt    0.4608    0.4609    0.1445
Pt    0.4606    0.4591    0.1889
Pt    0.4597    0.4601    0.2351
Pt    0.3066    0.2598    0.1435
Pt    0.2576    0.4844    0.2344
Pt    0.4370    0.2576    0.2337
Pt    0.3289    0.5061    0.1860
Pt    0.4825    0.4837    0.2350
Pt    0.4829    0.4822    0.1892
Pt    0.4835    0.4835    0.1438
Pt    0.4823    0.4385    0.2349
Pt    0.4378    0.3056    0.1435
Pt    0.4839    0.4387    0.1892
Pt    0.4834    0.3928    0.2335
Pt    0.3501    0.3277    0.2556
Pt    0.4842    0.3947    0.1882
Pt    0.3042    0.5063    0.2093
Pt    0.4141    0.2580    0.2111
Pt    0.3033    0.3934    0.1870
Pt    0.3926    0.4856    0.2348
Pt    0.4837    0.3484    0.2360
Pt    0.2795    0.3034    0.1656
Pt    0.2791    0.3043    0.2105
Pt    0.4611    0.5069    0.2361
Pt    0.2812    0.3485    0.2089
Pt    0.2816    0.3039    0.2572
Pt    0.2806    0.3925    0.2109
Pt    0.4364    0.2574    0.1869
Pt    0.2796    0.4379    0.1640
Pt    0.2806    0.4362    0.2101
Pt    0.3254    0.4857    0.2568
Pt    0.2806    0.4834    0.1659
Pt    0.2791    0.4834    0.2121
Pt    0.4613    0.2587    0.2113
Pt    0.3287    0.3011    0.1650
Pt    0.3266    0.3037    0.2094
Pt    0.3278    0.3486    0.2554
Pt    0.3252    0.3468    0.1628
Pt    0.3298    0.3521    0.2114
Pt    0.3938    0.3061    0.1878
Pt    0.3261    0.3935    0.2104
Pt    0.3250    0.4356    0.1655
Pt    0.3270    0.4371    0.2103
Pt    0.3480    0.4844    0.2344
Pt    0.3272    0.4834    0.1656
Pt    0.3273    0.4832    0.2111
Pt    0.3497    0.4850    0.1878
Pt    0.3720    0.3061    0.2097
Pt    0.3046    0.3492    0.2336
Pt    0.3718    0.4383    0.2101
Pt    0.3941    0.2573    0.1869
Pt    0.3718    0.4847    0.2104
Pt    0.4589    0.2609    0.1656
Pt    0.4151    0.3051    0.2122
Pt    0.3024    0.3504    0.1854
Pt    0.4146    0.4365    0.1666
Pt    0.4146    0.4385    0.2113
Pt    0.2575    0.3719    0.2090
Pt    0.4146    0.4848    0.2109
Pt    0.2577    0.2793    0.1668
Pt    0.4628    0.3036    0.1657
Pt    0.4603    0.3039    0.2125
Pt    0.3503    0.4359    0.2338
Pt    0.4621    0.3481    0.2107
Pt    0.2578    0.2802    0.2568
Pt    0.4606    0.3934    0.2112
Pt    0.3488    0.4381    0.1879
Pt    0.4608    0.4376    0.1652
Pt    0.4604    0.4375    0.2110
Pt    0.3050    0.3032    0.2340
Pt    0.4610    0.4835    0.1671
Pt    0.4608    0.4836    0.2113
Pt    0.2586    0.4824    0.1420
Pt    0.4838    0.3501    0.1890
Pt    0.4836    0.4613    0.1662
Pt    0.3040    0.3041    0.1868
Pt    0.3029    0.4364    0.1871
Pt    0.4828    0.3044    0.2347
Pt    0.4844    0.3029    0.1902
Pt    0.3045    0.4373    0.2327
Pt    0.4845    0.3051    0.1441
Pt    0.3924    0.4349    0.2362
Pt    0.4379    0.4834    0.2330
Pt    0.4381    0.4858    0.1888
Pt    0.4367    0.4833    0.1427
Pt    0.5066    0.4616    0.2354
Pt    0.3041    0.2806    0.1653
Pt    0.3039    0.2811    0.2097
Pt    0.3024    0.3039    0.1445
Pt    0.3015    0.3288    0.1642
Pt    0.3040    0.3267    0.2096
Pt    0.3940    0.2575    0.2350
Pt    0.3045    0.3711    0.2076
Pt    0.4380    0.4386    0.2324
Pt    0.3026    0.4159    0.2113
Pt    0.3936    0.3050    0.2338
Pt    0.3031    0.4613    0.1659
Pt    0.3042    0.4606    0.2114
Pt    0.3039    0.3917    0.2321
Pt    0.3931    0.4386    0.1884
Pt    0.3481    0.3494    0.1864
Pt    0.3042    0.4597    0.2564
Pt    0.3492    0.2804    0.2102
Pt    0.3497    0.3044    0.1878
Pt    0.3492    0.3266    0.1651
Pt    0.3495    0.3285    0.2108
Pt    0.4373    0.4396    0.1870
Pt    0.3484    0.4609    0.2116
Pt    0.4385    0.4387    0.1450
Pt    0.4392    0.3050    0.1883
Pt    0.4596    0.5065    0.1435
Pt    0.3900    0.2814    0.2112
Pt    0.4358    0.3939    0.1899
Pt    0.3962    0.3313    0.2107
Pt    0.4384    0.3509    0.2353
Pt    0.3925    0.4603    0.2101
Pt    0.3055    0.4843    0.2327
Pt    0.2579    0.3492    0.2314
Pt    0.3030    0.4843    0.1884
Pt    0.4355    0.2830    0.1668
Pt    0.4361    0.2802    0.2119
Pt    0.5061    0.4845    0.2116
Pt    0.4418    0.3291    0.1655
Pt    0.4393    0.3268    0.2116
Pt    0.4405    0.3488    0.1888
Pt    0.4381    0.3707    0.2106
Pt    0.4371    0.4149    0.1654
Pt    0.4355    0.4147    0.2127
Pt    0.4377    0.3048    0.2353
Pt    0.4370    0.4627    0.1658
Pt    0.4371    0.4615    0.2114
Pt    0.3047    0.4833    0.1434
Pt    0.4841    0.4615    0.2127
Pt    0.3498    0.3054    0.2339
Pt    0.3041    0.4373    0.1444
Pt    0.4849    0.2806    0.1656
Pt    0.4866    0.2803    0.2118
Pt    0.4841    0.4165    0.2118
Pt    0.4849    0.3299    0.1642
Pt    0.4833    0.3265    0.2119
Pt    0.4842    0.3718    0.2110
Pt    0.4363    0.4148    0.2555
Pt    0.5064    0.5060    0.1889
Pt    0.4857    0.2572    0.2348
Pt    0.2581    0.4149    0.2096
Pt    0.5072    0.4154    0.1878
Pt    0.5067    0.3934    0.2108
Pt    0.5070    0.3059    0.1666
Pt    0.3287    0.5061    0.1428
Pt    0.5072    0.3714    0.2347
Pt    0.5049    0.4844    0.2572
Pt    0.5071    0.3286    0.1886
Pt    0.5071    0.3486    0.2136
Pt    0.5063    0.4167    0.2354
Pt    0.2580    0.5066    0.2101
Pt    0.4365    0.5057    0.1654
Pt    0.2577    0.3476    0.1869
Pt    0.3480    0.4599    0.2553
Pt    0.4845    0.2811    0.2568
Pt    0.5068    0.3034    0.2573
Pt    0.5058    0.4608    0.1895
Pt    0.4842    0.5069    0.1663
Pt    0.3937    0.3284    0.2564
Pt    0.4378    0.2814    0.2559
Pt    0.2806    0.4376    0.2572
Pt    0.2807    0.4839    0.2551
Pt    0.3940    0.4603    0.2562
Pt    0.4160    0.2575    0.2572
Pt    0.4847    0.3273    0.2572
Pt    0.4145    0.4365    0.2560
Pt    0.5073    0.2813    0.1429
Pt    0.3254    0.3033    0.2573
Pt    0.4351    0.4592    0.2573
Pt    0.2805    0.2807    0.2789
Pt    0.2788    0.2814    0.3254
Pt    0.2812    0.2805    0.3711
Pt    0.2806    0.3279    0.2808
Pt    0.2805    0.3280    0.3255
Pt    0.2790    0.3271    0.3717
Pt    0.2809    0.3727    0.2806
Pt    0.2804    0.4147    0.2809
Pt    0.2797    0.4139    0.3275
Pt    0.2791    0.4600    0.2796
Pt    0.2809    0.4601    0.3261
Pt    0.2794    0.4610    0.3698
Pt    0.3036    0.2580    0.3709
Pt    0.2576    0.3936    0.2798
Pt    0.3252    0.2577    0.3489
Pt    0.3269    0.2795    0.2807
Pt    0.3249    0.2799    0.3272
Pt    0.3272    0.3260    0.2791
Pt    0.3248    0.3259    0.3274
Pt    0.3260    0.3268    0.3714
Pt    0.3253    0.3709    0.3261
Pt    0.3282    0.4150    0.2829
Pt    0.3246    0.4158    0.3258
Pt    0.3269    0.4624    0.2797
Pt    0.3270    0.4627    0.3264
Pt    0.3273    0.4599    0.3679
Pt    0.3268    0.2576    0.3045
Pt    0.4840    0.2574    0.2803
Pt    0.4846    0.2578    0.3703
Pt    0.3695    0.2812    0.2821
Pt    0.3716    0.2811    0.3270
Pt    0.3704    0.3280    0.2793
Pt    0.3705    0.3255    0.3260
Pt    0.3714    0.4598    0.2800
Pt    0.3699    0.4597    0.3266
Pt    0.4598    0.4843    0.2583
Pt    0.4159    0.2813    0.2794
Pt    0.4154    0.2814    0.3260
Pt    0.4166    0.3280    0.2813
Pt    0.4148    0.3255    0.3269
Pt    0.4137    0.4135    0.3239
Pt    0.4140    0.4585    0.2809
Pt    0.4145    0.4615    0.3276
Pt    0.4612    0.2580    0.3032
Pt    0.3935    0.2597    0.2806
Pt    0.4621    0.2815    0.2798
Pt    0.4608    0.2809    0.3248
Pt    0.4603    0.2789    0.3725
Pt    0.4619    0.3281    0.2791
Pt    0.4625    0.3270    0.3280
Pt    0.4621    0.3269    0.3715
Pt    0.4607    0.3726    0.2821
Pt    0.4607    0.3705    0.3278
Pt    0.4592    0.4152    0.2805
Pt    0.4586    0.4169    0.3251
Pt    0.4594    0.4611    0.2807
Pt    0.4597    0.4594    0.3290
Pt    0.4607    0.4609    0.3739
Pt    0.4854    0.3739    0.2578
Pt    0.4393    0.2582    0.2802
Pt    0.2587    0.3277    0.3478
Pt    0.3038    0.4141    0.2588
Pt    0.2574    0.3263    0.3031
Pt    0.3490    0.2574    0.2788
Pt    0.3920    0.5070    0.3065
Pt    0.4831    0.4832    0.3727
Pt    0.4821    0.4835    0.3284
Pt    0.4832    0.4846    0.2813
Pt    0.4834    0.4373    0.3275
Pt    0.3707    0.4824    0.2579
Pt    0.3921    0.2824    0.2579
Pt    0.4832    0.4399    0.2818
Pt    0.4603    0.3516    0.2577
Pt    0.4828    0.3937    0.3276
Pt    0.4824    0.3935    0.2825
Pt    0.4601    0.4375    0.2592
Pt    0.2795    0.3042    0.3015
Pt    0.2803    0.3047    0.3485
Pt    0.2793    0.3496    0.3034
Pt    0.2807    0.3927    0.3054
Pt    0.2795    0.4383    0.3038
Pt    0.2808    0.4367    0.3480
Pt    0.2802    0.4840    0.3010
Pt    0.2790    0.4837    0.3479
Pt    0.3259    0.3031    0.3045
Pt    0.3248    0.3017    0.3496
Pt    0.3269    0.3490    0.3029
Pt    0.3252    0.3494    0.3489
Pt    0.3268    0.3940    0.3048
Pt    0.3265    0.4397    0.3043
Pt    0.3242    0.4381    0.3475
Pt    0.3254    0.4848    0.3030
Pt    0.3289    0.4863    0.3494
Pt    0.3714    0.3044    0.3026
Pt    0.3684    0.4363    0.3036
Pt    0.3695    0.4829    0.3025
Pt    0.4164    0.3036    0.3025
Pt    0.4144    0.4373    0.3039
Pt    0.4146    0.4389    0.3492
Pt    0.4153    0.4840    0.3059
Pt    0.4613    0.3056    0.3016
Pt    0.4615    0.3036    0.3475
Pt    0.4617    0.3487    0.3047
Pt    0.4609    0.3943    0.3058
Pt    0.4598    0.4386    0.3025
Pt    0.4617    0.4371    0.3508
Pt    0.4596    0.4840    0.3050
Pt    0.4596    0.4848    0.3500
Pt    0.4856    0.3504    0.3277
Pt    0.4838    0.3502    0.2801
Pt    0.2577    0.4830    0.3249
Pt    0.4828    0.3037    0.3700
Pt    0.4143    0.5062    0.3260
Pt    0.2802    0.3930    0.2574
Pt    0.4844    0.3035    0.3260
Pt    0.4846    0.3047    0.2822
Pt    0.3031    0.2790    0.3030
Pt    0.3018    0.2816    0.3484
Pt    0.3035    0.3272    0.3025
Pt    0.3019    0.3275    0.3494
Pt    0.3029    0.3717    0.3043
Pt    0.3025    0.4150    0.3036
Pt    0.3037    0.4602    0.3026
Pt    0.3047    0.4619    0.3481
Pt    0.2793    0.2584    0.3483
Pt    0.4831    0.5071    0.3508
Pt    0.3488    0.2794    0.3050
Pt    0.3490    0.3266    0.3041
Pt    0.3482    0.3279    0.3491
Pt    0.3483    0.4626    0.3028
Pt    0.2580    0.3047    0.3253
Pt    0.3938    0.2821    0.3048
Pt    0.3927    0.3278    0.3041
Pt    0.3931    0.4610    0.3051
Pt    0.5067    0.4849    0.3040
Pt    0.4390    0.2815    0.3026
Pt    0.4393    0.2794    0.3475
Pt    0.4390    0.3269    0.3034
Pt    0.4365    0.3254    0.3501
Pt    0.4383    0.3707    0.3049
Pt    0.4362    0.4119    0.3015
Pt    0.4360    0.4166    0.3483
Pt    0.4377    0.4612    0.3034
Pt    0.4374    0.4602    0.3509
Pt    0.3703    0.5061    0.2820
Pt    0.4834    0.4175    0.2581
Pt    0.4856    0.2794    0.3037
Pt    0.4836    0.2802    0.3482
Pt    0.4850    0.3282    0.3036
Pt    0.4854    0.3272    0.3495
Pt    0.4837    0.3711    0.3060
Pt    0.4845    0.4162    0.3038
Pt    0.4826    0.4624    0.3046
Pt    0.4840    0.4596    0.3508
Pt    0.5072    0.4842    0.3491
Pt    0.5066    0.3922    0.3052
Pt    0.3036    0.3040    0.2813
Pt    0.3024    0.3033    0.3246
Pt    0.3021    0.3071    0.3712
Pt    0.3055    0.3510    0.2792
Pt    0.3028    0.3490    0.3266
Pt    0.3060    0.3930    0.2817
Pt    0.3028    0.3922    0.3297
Pt    0.3043    0.4365    0.2810
Pt    0.3020    0.4374    0.3260
Pt    0.3029    0.4394    0.3699
Pt    0.3029    0.4845    0.2801
Pt    0.3023    0.4845    0.3254
Pt    0.3042    0.4844    0.3692
Pt    0.3474    0.3045    0.2796
Pt    0.3480    0.3042    0.3286
Pt    0.3486    0.3495    0.3277
Pt    0.3491    0.4373    0.2793
Pt    0.3475    0.4377    0.3271
Pt    0.3478    0.4853    0.2800
Pt    0.3490    0.4859    0.3258
Pt    0.3938    0.3053    0.2801
Pt    0.3938    0.3038    0.3280
Pt    0.3931    0.4348    0.2814
Pt    0.3910    0.4357    0.3249
Pt    0.3945    0.4831    0.2827
Pt    0.4384    0.3052    0.2791
Pt    0.4383    0.3029    0.3253
Pt    0.4384    0.3027    0.3707
Pt    0.4362    0.3513    0.2804
Pt    0.4384    0.3471    0.3286
Pt    0.4399    0.3912    0.3278
Pt    0.4368    0.4366    0.2809
Pt    0.4371    0.4372    0.3257
Pt    0.4378    0.4374    0.3726
Pt    0.4378    0.4837    0.2816
Pt    0.4377    0.4852    0.3277
Pt    0.4364    0.4835    0.3753
Pt    0.3032    0.2574    0.3264
Pt    0.2577    0.2825    0.3487
Pt    0.4152    0.5050    0.2821
Pt    0.5072    0.4613    0.2824
Pt    0.5064    0.4392    0.3048
Pt    0.4154    0.4834    0.2575
Pt    0.5065    0.2810    0.3713
Pt    0.4587    0.3926    0.2576
Pt    0.5068    0.4145    0.3267
Pt    0.4341    0.5058    0.3511
Pt    0.5058    0.4167    0.2811
Pt    0.2585    0.4853    0.2793
Pt    0.3942    0.5066    0.2575
Pt    0.5066    0.3035    0.3025
Pt    0.5071    0.3705    0.3288
Pt    0.4596    0.5067    0.2814
Pt    0.4382    0.5065    0.3044
Pt    0.5072    0.2788    0.3262
Pt    0.5063    0.4609    0.3281
Pt    0.4825    0.4616    0.2578
Pt    0.5065    0.4389    0.2582
Pt    0.3486    0.2798    0.2581
Pt    0.3064    0.3737    0.2578
Pt    0.3036    0.3271    0.2579
Pt    0.4148    0.3065    0.2583
Pt    0.3041    0.2807    0.2579
Pt    0.3710    0.4353    0.2582
Pt    0.3703    0.3046    0.2578
Pt    0.2803    0.3500    0.2575
Pt    0.4608    0.3039    0.2576
Pt    0.4389    0.3285    0.2586
Pt    0.4606    0.2577    0.2574
Pt    0.2788    0.2810    0.4150
Pt    0.2799    0.2799    0.4617
Pt    0.4614    0.2574    0.4833
Pt    0.2798    0.3288    0.4157
Pt    0.2768    0.3252    0.4624
Pt    0.4612    0.2581    0.4391
Pt    0.2814    0.3715    0.4603
Pt    0.2812    0.4599    0.5066
Pt    0.2805    0.4142    0.4593
Pt    0.4861    0.2581    0.4599
Pt    0.2798    0.4612    0.4143
Pt    0.2793    0.4610    0.4618
Pt    0.3033    0.2591    0.4151
Pt    0.2782    0.2809    0.5063
Pt    0.3481    0.4834    0.4627
Pt    0.4378    0.2583    0.4607
Pt    0.3256    0.2811    0.4131
Pt    0.3277    0.2801    0.4611
Pt    0.2794    0.3707    0.5064
Pt    0.3270    0.3264    0.4155
Pt    0.3258    0.3257    0.4597
Pt    0.3278    0.2584    0.4381
Pt    0.3276    0.3706    0.4608
Pt    0.4137    0.3254    0.5067
Pt    0.3251    0.4167    0.4155
Pt    0.3269    0.4155    0.4615
Pt    0.3034    0.5052    0.4829
Pt    0.3259    0.4604    0.4157
Pt    0.3243    0.4609    0.4611
Pt    0.3268    0.2826    0.5068
Pt    0.4587    0.5054    0.4163
Pt    0.4367    0.4825    0.5072
Pt    0.2815    0.5068    0.4614
Pt    0.3711    0.2809    0.4601
Pt    0.5064    0.3927    0.4834
Pt    0.3696    0.3271    0.4604
Pt    0.3703    0.4619    0.4611
Pt    0.5069    0.3273    0.4123
Pt    0.3483    0.4394    0.4607
Pt    0.4368    0.3928    0.5059
Pt    0.4164    0.2807    0.4618
Pt    0.3045    0.3923    0.4608
Pt    0.4151    0.3267    0.4146
Pt    0.4149    0.3261    0.4616
Pt    0.3031    0.3048    0.4136
Pt    0.4145    0.4607    0.4609
Pt    0.5068    0.3037    0.4842
Pt    0.3718    0.2571    0.4370
Pt    0.2580    0.4369    0.4175
Pt    0.4605    0.2794    0.4147
Pt    0.4609    0.2797    0.4617
Pt    0.4371    0.3938    0.4598
Pt    0.4636    0.3275    0.4130
Pt    0.4605    0.3274    0.4602
Pt    0.3715    0.5049    0.4584
Pt    0.4597    0.3708    0.4608
Pt    0.4365    0.3475    0.4618
Pt    0.4608    0.4148    0.4611
Pt    0.4380    0.3486    0.4159
Pt    0.4604    0.4599    0.4156
Pt    0.4611    0.4601    0.4628
Pt    0.4379    0.3043    0.4628
Pt    0.2811    0.2575    0.3926
Pt    0.4836    0.3929    0.5072
Pt    0.2574    0.4611    0.4390
Pt    0.3020    0.2582    0.5072
Pt    0.4846    0.4828    0.4611
Pt    0.4845    0.4835    0.4174
Pt    0.3491    0.4397    0.4157
Pt    0.4385    0.3032    0.4148
Pt    0.4829    0.4377    0.4604
Pt    0.5050    0.3492    0.4351
Pt    0.4832    0.4378    0.4139
Pt    0.4371    0.3506    0.5067
Pt    0.4843    0.3925    0.4582
Pt    0.4825    0.4598    0.4385
Pt    0.4835    0.3492    0.4605
Pt    0.3017    0.3481    0.4625
Pt    0.4364    0.5051    0.4837
Pt    0.4859    0.4609    0.3934
Pt    0.4844    0.3039    0.4601
Pt    0.2804    0.3026    0.3929
Pt    0.2794    0.3033    0.4379
Pt    0.2778    0.3028    0.4835
Pt    0.2810    0.3488    0.4387
Pt    0.2794    0.3483    0.4846
Pt    0.2794    0.3942    0.4832
Pt    0.2795    0.4375    0.3922
Pt    0.2799    0.4374    0.4379
Pt    0.2813    0.4371    0.4820
Pt    0.2795    0.4833    0.3914
Pt    0.2802    0.4836    0.4388
Pt    0.2800    0.4849    0.4849
Pt    0.3254    0.3046    0.3927
Pt    0.3264    0.3027    0.4356
Pt    0.3253    0.3036    0.4836
Pt    0.3278    0.3490    0.4386
Pt    0.3254    0.3481    0.4841
Pt    0.3264    0.3938    0.4384
Pt    0.3291    0.3933    0.4854
Pt    0.3259    0.4375    0.3926
Pt    0.3252    0.4379    0.4381
Pt    0.3262    0.4378    0.4843
Pt    0.3282    0.4819    0.3917
Pt    0.3259    0.4840    0.4369
Pt    0.3261    0.4834    0.4847
Pt    0.3718    0.3018    0.4365
Pt    0.3703    0.3049    0.4841
Pt    0.3711    0.4365    0.4379
Pt    0.3700    0.4821    0.4855
Pt    0.4163    0.3027    0.4373
Pt    0.4148    0.3028    0.4844
Pt    0.4150    0.3472    0.4383
Pt    0.4135    0.4368    0.4388
Pt    0.4133    0.4355    0.4826
Pt    0.4159    0.4851    0.4376
Pt    0.4139    0.4834    0.4843
Pt    0.4618    0.3042    0.3929
Pt    0.4609    0.3045    0.4378
Pt    0.4606    0.3033    0.4843
Pt    0.4600    0.3491    0.4374
Pt    0.4601    0.3490    0.4839
Pt    0.4596    0.3935    0.4359
Pt    0.4601    0.3941    0.4840
Pt    0.4596    0.4361    0.3948
Pt    0.4598    0.4360    0.4364
Pt    0.4603    0.4382    0.4853
Pt    0.4604    0.4834    0.3955
Pt    0.4591    0.4834    0.4386
Pt    0.4614    0.4836    0.4851
Pt    0.4831    0.3039    0.4147
Pt    0.5067    0.4387    0.4829
Pt    0.3487    0.3030    0.4605
Pt    0.4846    0.2574    0.4159
Pt    0.3924    0.4833    0.4613
Pt    0.3026    0.4823    0.4157
Pt    0.4378    0.4821    0.4619
Pt    0.4359    0.4837    0.4148
Pt    0.3025    0.4840    0.4603
Pt    0.3928    0.3031    0.4614
Pt    0.5069    0.4858    0.4836
Pt    0.5071    0.4157    0.5062
Pt    0.3036    0.2821    0.3930
Pt    0.3042    0.2794    0.4385
Pt    0.3013    0.2800    0.4832
Pt    0.3037    0.3293    0.3947
Pt    0.3031    0.3278    0.4375
Pt    0.3034    0.3257    0.4829
Pt    0.3044    0.3693    0.4393
Pt    0.3047    0.3713    0.4843
Pt    0.3003    0.4140    0.4357
Pt    0.3035    0.4137    0.4849
Pt    0.3030    0.4611    0.3931
Pt    0.3026    0.4594    0.4381
Pt    0.3025    0.4609    0.4837
Pt    0.5063    0.3930    0.4359
Pt    0.4842    0.4154    0.4836
Pt    0.4374    0.4384    0.4605
Pt    0.3481    0.2804    0.4346
Pt    0.3499    0.2798    0.4831
Pt    0.3493    0.3253    0.4370
Pt    0.3481    0.3269    0.4833
Pt    0.3484    0.4160    0.4390
Pt    0.3498    0.4606    0.4372
Pt    0.3480    0.4597    0.4837
Pt    0.3043    0.4352    0.4615
Pt    0.3035    0.3040    0.4602
Pt    0.3940    0.2803    0.4362
Pt    0.3937    0.2815    0.4850
Pt    0.3932    0.3238    0.4370
Pt    0.3937    0.4622    0.4375
Pt    0.3924    0.4593    0.4857
Pt    0.3922    0.4380    0.4611
Pt    0.4378    0.2808    0.4371
Pt    0.4382    0.2806    0.4839
Pt    0.4390    0.3270    0.3937
Pt    0.4377    0.3257    0.4384
Pt    0.4361    0.3263    0.4841
Pt    0.4372    0.3708    0.4382
Pt    0.4359    0.3722    0.4842
Pt    0.4367    0.4155    0.4396
Pt    0.4370    0.4165    0.4838
Pt    0.4356    0.4599    0.3942
Pt    0.4371    0.4609    0.4367
Pt    0.4359    0.4589    0.4848
Pt    0.3014    0.4375    0.4134
Pt    0.4843    0.4604    0.4856
Pt    0.4364    0.4366    0.4147
Pt    0.4850    0.2804    0.3930
Pt    0.4831    0.2817    0.4380
Pt    0.4835    0.2813    0.4857
Pt    0.4832    0.3275    0.4365
Pt    0.4831    0.3266    0.4834
Pt    0.4835    0.3723    0.4334
Pt    0.4822    0.3725    0.4828
Pt    0.4844    0.4148    0.4361
Pt    0.4376    0.5071    0.4387
Pt    0.4138    0.5065    0.4602
Pt    0.5039    0.3501    0.4848
Pt    0.5067    0.3052    0.4379
Pt    0.3026    0.3027    0.5065
Pt    0.5055    0.4158    0.4585
Pt    0.5049    0.3046    0.3921
Pt    0.3252    0.5058    0.4592
Pt    0.3723    0.2577    0.4849
Pt    0.5065    0.3276    0.4616
Pt    0.3252    0.5061    0.5066
Pt    0.3905    0.5059    0.4844
Pt    0.5065    0.4613    0.4611
Pt    0.4597    0.5060    0.4596
Pt    0.4849    0.5070    0.4385
Pt    0.2799    0.5058    0.4147
Pt    0.3038    0.5056    0.3931
Pt    0.2796    0.2575    0.4388
Pt    0.3498    0.5058    0.4371
Pt    0.3032    0.5066    0.4370
Pt    0.4844    0.3050    0.5062
Pt    0.2798    0.4138    0.5062
Pt    0.4145    0.5068    0.5062
Pt    0.5067    0.3265    0.5068
Pt    0.4835    0.2571    0.5071
Pt    0.4604    0.3277    0.5055
Pt    0.3482    0.4392    0.5068
Pt    0.4837    0.4379    0.5072
Pt    0.4600    0.3711    0.5073
Pt    0.2799    0.2796    0.5549
Pt    0.2796    0.2800    0.5996
Pt    0.2781    0.3255    0.5536
Pt    0.2801    0.3255    0.5982
Pt    0.2777    0.3719    0.5531
Pt    0.2789    0.4140    0.5534
Pt    0.2816    0.4607    0.5522
Pt    0.2780    0.4601    0.5992
Pt    0.4387    0.2571    0.5079
Pt    0.2585    0.4828    0.5540
Pt    0.3259    0.2812    0.5551
Pt    0.3264    0.2789    0.6007
Pt    0.3251    0.3260    0.5535
Pt    0.3251    0.3249    0.5985
Pt    0.3256    0.3696    0.5538
Pt    0.3250    0.4147    0.5512
Pt    0.3246    0.4145    0.5982
Pt    0.3284    0.4610    0.5554
Pt    0.3261    0.4589    0.5978
Pt    0.3709    0.2578    0.5320
Pt    0.4380    0.2596    0.5998
Pt    0.3720    0.2818    0.5548
Pt    0.3696    0.3280    0.5552
Pt    0.3719    0.4588    0.5544
Pt    0.3030    0.2572    0.6007
Pt    0.4175    0.2826    0.5525
Pt    0.4143    0.3289    0.5508
Pt    0.4151    0.3281    0.5995
Pt    0.4148    0.4606    0.5542
Pt    0.4140    0.4601    0.5091
Pt    0.4611    0.2810    0.5532
Pt    0.4631    0.2811    0.5996
Pt    0.4608    0.3277    0.5529
Pt    0.4615    0.3266    0.6021
Pt    0.4619    0.3716    0.5525
Pt    0.4619    0.4155    0.5522
Pt    0.4603    0.4624    0.5526
Pt    0.4616    0.4613    0.5998
Pt    0.4579    0.2573    0.6222
Pt    0.3703    0.2579    0.5749
Pt    0.4833    0.4832    0.5992
Pt    0.5069    0.2824    0.5076
Pt    0.5071    0.2812    0.5536
Pt    0.5062    0.2586    0.6220
Pt    0.2797    0.2580    0.5303
Pt    0.2810    0.2572    0.5771
Pt    0.5057    0.4388    0.5314
Pt    0.4835    0.4842    0.5531
Pt    0.3264    0.2594    0.5297
Pt    0.4831    0.4393    0.5990
Pt    0.2785    0.3004    0.5307
Pt    0.2790    0.3034    0.5773
Pt    0.2809    0.3042    0.6210
Pt    0.2795    0.3477    0.5296
Pt    0.2766    0.3487    0.5762
Pt    0.2791    0.3920    0.5302
Pt    0.2788    0.4377    0.5303
Pt    0.2777    0.4389    0.5762
Pt    0.2801    0.4369    0.6200
Pt    0.2812    0.4826    0.5297
Pt    0.2811    0.4830    0.5757
Pt    0.2800    0.4840    0.6212
Pt    0.3258    0.3024    0.5305
Pt    0.3232    0.3022    0.5783
Pt    0.3260    0.3022    0.6237
Pt    0.3255    0.3481    0.5313
Pt    0.3256    0.3485    0.5760
Pt    0.3277    0.3933    0.5294
Pt    0.3242    0.3928    0.5745
Pt    0.3277    0.4388    0.5303
Pt    0.3244    0.4364    0.5749
Pt    0.3243    0.4374    0.6203
Pt    0.3266    0.4834    0.5327
Pt    0.3282    0.4838    0.5776
Pt    0.3256    0.4823    0.6200
Pt    0.3712    0.3035    0.5310
Pt    0.3713    0.3049    0.5762
Pt    0.3713    0.4359    0.5755
Pt    0.3714    0.4835    0.5315
Pt    0.4159    0.3029    0.5303
Pt    0.4157    0.3049    0.5768
Pt    0.4154    0.3508    0.5752
Pt    0.4157    0.4360    0.5323
Pt    0.4166    0.4377    0.5765
Pt    0.4154    0.4845    0.5325
Pt    0.4153    0.4822    0.5781
Pt    0.4625    0.3049    0.5294
Pt    0.4614    0.3042    0.5774
Pt    0.4603    0.3038    0.6221
Pt    0.4613    0.3490    0.5294
Pt    0.4612    0.3488    0.5787
Pt    0.4606    0.3926    0.5302
Pt    0.4612    0.3943    0.5772
Pt    0.4615    0.4383    0.5309
Pt    0.4610    0.4389    0.5762
Pt    0.4613    0.4374    0.6224
Pt    0.4609    0.4828    0.5307
Pt    0.4589    0.4842    0.5772
Pt    0.4607    0.4856    0.6212
Pt    0.2807    0.5055    0.5525
Pt    0.4841    0.4387    0.5539
Pt    0.4837    0.3933    0.5541
Pt    0.3949    0.2578    0.5544
Pt    0.3489    0.4826    0.5081
Pt    0.4840    0.3486    0.5544
Pt    0.3037    0.4836    0.5087
Pt    0.4157    0.2577    0.5776
Pt    0.4850    0.3058    0.6010
Pt    0.4155    0.2793    0.5074
Pt    0.5072    0.4833    0.5761
Pt    0.4838    0.3045    0.5540
Pt    0.3024    0.2807    0.5305
Pt    0.3025    0.2790    0.5783
Pt    0.3054    0.2802    0.6225
Pt    0.3024    0.3245    0.5311
Pt    0.3015    0.3273    0.5765
Pt    0.3027    0.3271    0.6211
Pt    0.3040    0.3711    0.5291
Pt    0.3027    0.3708    0.5764
Pt    0.3032    0.4156    0.5298
Pt    0.2993    0.4138    0.5772
Pt    0.3034    0.4592    0.5303
Pt    0.3029    0.4603    0.5760
Pt    0.3023    0.4587    0.6212
Pt    0.3936    0.3040    0.5080
Pt    0.3513    0.3052    0.5077
Pt    0.4363    0.4849    0.5541
Pt    0.3486    0.2815    0.5297
Pt    0.3497    0.2796    0.5797
Pt    0.3478    0.3263    0.5321
Pt    0.3468    0.3253    0.5763
Pt    0.3476    0.4137    0.5731
Pt    0.3479    0.4609    0.5315
Pt    0.3506    0.4604    0.5781
Pt    0.4399    0.4366    0.5978
Pt    0.4835    0.3505    0.5074
Pt    0.3942    0.2804    0.5317
Pt    0.3960    0.2819    0.5744
Pt    0.3946    0.3278    0.5757
Pt    0.3919    0.4587    0.5308
Pt    0.3934    0.4594    0.5784
Pt    0.4387    0.4386    0.5533
Pt    0.4406    0.2801    0.5312
Pt    0.4380    0.2821    0.5760
Pt    0.4377    0.3280    0.5291
Pt    0.4387    0.3264    0.5779
Pt    0.4360    0.3261    0.6221
Pt    0.4368    0.3704    0.5311
Pt    0.4401    0.3716    0.5764
Pt    0.4391    0.4151    0.5305
Pt    0.4398    0.4146    0.5758
Pt    0.4356    0.4591    0.5301
Pt    0.4375    0.4611    0.5778
Pt    0.4371    0.4596    0.6206
Pt    0.4371    0.3931    0.5530
Pt    0.4386    0.3500    0.5988
Pt    0.4157    0.2578    0.5313
Pt    0.4835    0.2796    0.5298
Pt    0.4852    0.2803    0.5758
Pt    0.4832    0.2818    0.6231
Pt    0.4836    0.3264    0.5304
Pt    0.4844    0.3280    0.5771
Pt    0.4852    0.3699    0.5311
Pt    0.4842    0.3708    0.5791
Pt    0.4848    0.4156    0.5299
Pt    0.4833    0.4166    0.5762
Pt    0.4832    0.4611    0.5296
Pt    0.4836    0.4612    0.5765
Pt    0.4842    0.4602    0.6232
Pt    0.3027    0.5063    0.6213
Pt    0.4352    0.4842    0.6003
Pt    0.3044    0.5065    0.5318
Pt    0.3018    0.3027    0.5542
Pt    0.3027    0.3033    0.6005
Pt    0.3020    0.3493    0.5530
Pt    0.3028    0.3917    0.5528
Pt    0.3018    0.4362    0.5540
Pt    0.3012    0.4361    0.5970
Pt    0.3037    0.4835    0.5532
Pt    0.3019    0.4826    0.5988
Pt    0.3482    0.3029    0.5548
Pt    0.3489    0.4362    0.5528
Pt    0.3475    0.4365    0.5975
Pt    0.3508    0.4831    0.5548
Pt    0.3932    0.3065    0.5523
Pt    0.3923    0.4357    0.5527
Pt    0.3914    0.4846    0.5560
Pt    0.4388    0.3051    0.5539
Pt    0.4382    0.3023    0.5999
Pt    0.4385    0.3493    0.5543
Pt    0.4602    0.5065    0.5083
Pt    0.5071    0.4603    0.5541
Pt    0.3277    0.5066    0.5551
Pt    0.5052    0.5069    0.5981
Pt    0.3265    0.3696    0.5075
Pt    0.3930    0.4832    0.5086
Pt    0.2796    0.5054    0.5985
Pt    0.5070    0.4144    0.5550
Pt    0.4370    0.5061    0.5300
Pt    0.3477    0.2604    0.5533
Pt    0.5064    0.2825    0.5995
Pt    0.5062    0.3932    0.5773
Pt    0.3036    0.4381    0.5077
Pt    0.5072    0.3040    0.5780
Pt    0.3036    0.5061    0.5766
Pt    0.5070    0.3497    0.5771
Pt    0.3262    0.4615    0.5078
Pt    0.3497    0.5069    0.5771
Pt    0.4580    0.5060    0.5995
Pt    0.4592    0.5058    0.5548
Pt    0.3280    0.5064    0.6004
Pt    0.4841    0.5066    0.6207
Pt    0.4825    0.5066    0.5303
Pt    0.4826    0.5068    0.5764
Pt    0.3466    0.5066    0.5302
Pt    0.5060    0.5065    0.5537
Pt    0.4386    0.3041    0.5081
Pt    0.3707    0.5066    0.5088
Pt    0.2575    0.4838    0.5076
Pt    0.4612    0.4163    0.5077
Pt    0.5069    0.5068    0.5079
Pt    0.4374    0.4371    0.5080
Pt    0.4611    0.2803    0.5075
Pt    0.3493    0.2591    0.5076
Pt    0.4597    0.4599    0.5080
Pt    0.3721    0.2806    0.5087
Pt    0.3704    0.4588    0.5082
Pt    0.3261    0.3260    0.5080
Pt    0.3015    0.3482    0.5075
Pt    0.3274    0.4166    0.5075
Pt    0.2809    0.3247    0.5074
Pt    0.4844    0.4841    0.5074
Pt    0.3045    0.3926    0.5074
Pt    0.2794    0.2794    0.6424
Pt    0.2804    0.2813    0.6879
Pt    0.2796    0.2810    0.7340
Pt    0.2797    0.3273    0.6439
Pt    0.2798    0.3274    0.6894
Pt    0.2807    0.3262    0.7353
Pt    0.2812    0.3707    0.7351
Pt    0.2804    0.4147    0.6890
Pt    0.2799    0.4158    0.7333
Pt    0.2801    0.4601    0.6433
Pt    0.2792    0.4590    0.6884
Pt    0.2794    0.4600    0.7343
Pt    0.4373    0.2575    0.6885
Pt    0.4599    0.2575    0.7117
Pt    0.3935    0.2580    0.6865
Pt    0.3271    0.2810    0.6862
Pt    0.3267    0.2809    0.7352
Pt    0.3258    0.3276    0.6441
Pt    0.3241    0.3265    0.6906
Pt    0.3259    0.3249    0.7341
Pt    0.3249    0.3699    0.6879
Pt    0.3260    0.4144    0.6906
Pt    0.3296    0.4139    0.7359
Pt    0.3260    0.4601    0.6439
Pt    0.3258    0.4611    0.6880
Pt    0.3254    0.4620    0.7336
Pt    0.2583    0.4850    0.6433
Pt    0.2577    0.4819    0.7343
Pt    0.2576    0.2809    0.7101
Pt    0.3708    0.2806    0.6875
Pt    0.3705    0.2789    0.7343
Pt    0.3724    0.3269    0.6892
Pt    0.3715    0.3286    0.7327
Pt    0.3692    0.4599    0.6878
Pt    0.3714    0.4601    0.7354
Pt    0.5071    0.3039    0.6659
Pt    0.4150    0.2803    0.6883
Pt    0.4162    0.2799    0.7346
Pt    0.4169    0.3227    0.6890
Pt    0.4161    0.3259    0.7357
Pt    0.4144    0.4165    0.6889
Pt    0.4143    0.4599    0.6873
Pt    0.4158    0.4598    0.7329
Pt    0.5059    0.2820    0.6429
Pt    0.3508    0.2587    0.6869
Pt    0.4592    0.2796    0.6436
Pt    0.4631    0.2803    0.6891
Pt    0.4626    0.2809    0.7339
Pt    0.4598    0.3281    0.6429
Pt    0.4607    0.3254    0.6885
Pt    0.4604    0.3263    0.7349
Pt    0.4596    0.3703    0.6885
Pt    0.4592    0.3725    0.7333
Pt    0.4601    0.4153    0.6877
Pt    0.4602    0.4144    0.7336
Pt    0.4611    0.4609    0.6444
Pt    0.4621    0.4608    0.6884
Pt    0.4605    0.4610    0.7341
Pt    0.3925    0.3287    0.7565
Pt    0.5070    0.3268    0.6885
Pt    0.3711    0.2581    0.7095
Pt    0.4385    0.2577    0.7350
Pt    0.5060    0.4600    0.6892
Pt    0.4365    0.4609    0.7568
Pt    0.3033    0.5068    0.7573
Pt    0.3927    0.5050    0.7075
Pt    0.4836    0.3910    0.6868
Pt    0.5069    0.4366    0.6659
Pt    0.3707    0.4845    0.7569
Pt    0.4829    0.3496    0.7345
Pt    0.5061    0.2793    0.7349
Pt    0.3502    0.5065    0.7101
Pt    0.4361    0.4151    0.7549
Pt    0.4608    0.2579    0.6662
Pt    0.5061    0.4368    0.7109
Pt    0.4823    0.3487    0.6880
Pt    0.2797    0.3035    0.6649
Pt    0.2791    0.3043    0.7112
Pt    0.2809    0.3494    0.7124
Pt    0.2809    0.3923    0.7098
Pt    0.2811    0.4372    0.6663
Pt    0.2800    0.4386    0.7118
Pt    0.2793    0.4838    0.6662
Pt    0.2795    0.4831    0.7118
Pt    0.3244    0.3034    0.6654
Pt    0.3267    0.3017    0.7115
Pt    0.3262    0.3469    0.6673
Pt    0.3276    0.3496    0.7136
Pt    0.3270    0.3911    0.7120
Pt    0.3257    0.4369    0.6666
Pt    0.3266    0.4383    0.7137
Pt    0.3259    0.4840    0.6655
Pt    0.3271    0.4846    0.7105
Pt    0.3708    0.3031    0.7108
Pt    0.3714    0.4324    0.7130
Pt    0.3725    0.4841    0.7117
Pt    0.4155    0.3029    0.7121
Pt    0.4158    0.4368    0.6668
Pt    0.4134    0.4374    0.7113
Pt    0.4165    0.4825    0.7104
Pt    0.4600    0.3024    0.6653
Pt    0.4608    0.3044    0.7116
Pt    0.4597    0.3474    0.7114
Pt    0.4618    0.3933    0.7107
Pt    0.4621    0.4381    0.6660
Pt    0.4608    0.4363    0.7121
Pt    0.4613    0.4851    0.6659
Pt    0.4623    0.4841    0.7111
Pt    0.3266    0.5044    0.6420
Pt    0.4833    0.3044    0.7337
Pt    0.2582    0.4368    0.6421
Pt    0.4837    0.3034    0.6881
Pt    0.4839    0.4376    0.7346
Pt    0.2804    0.2575    0.6664
Pt    0.3043    0.4148    0.7564
Pt    0.4845    0.4366    0.6881
Pt    0.3034    0.2800    0.6662
Pt    0.3031    0.2788    0.7102
Pt    0.3022    0.3264    0.6669
Pt    0.3027    0.3277    0.7128
Pt    0.3052    0.3702    0.7120
Pt    0.3036    0.4133    0.7124
Pt    0.3041    0.4592    0.6654
Pt    0.3038    0.4607    0.7110
Pt    0.4835    0.3931    0.7351
Pt    0.2578    0.3939    0.7335
Pt    0.3493    0.2811    0.7106
Pt    0.3479    0.3266    0.6664
Pt    0.3492    0.3258    0.7113
Pt    0.3492    0.4609    0.7110
Pt    0.2811    0.3029    0.7571
Pt    0.3941    0.2798    0.7118
Pt    0.3949    0.3272    0.7108
Pt    0.3919    0.4591    0.7105
Pt    0.4840    0.4833    0.7344
Pt    0.4364    0.2810    0.6655
Pt    0.4390    0.2813    0.7113
Pt    0.4400    0.3266    0.6659
Pt    0.4370    0.3267    0.7122
Pt    0.4377    0.3707    0.7101
Pt    0.4380    0.4162    0.6646
Pt    0.4375    0.4138    0.7106
Pt    0.4373    0.4612    0.6670
Pt    0.4366    0.4596    0.7115
Pt    0.3497    0.3271    0.7571
Pt    0.4841    0.4851    0.6881
Pt    0.4846    0.2803    0.6646
Pt    0.4849    0.2795    0.7113
Pt    0.4832    0.3269    0.6660
Pt    0.4839    0.3266    0.7110
Pt    0.4829    0.3689    0.7117
Pt    0.4842    0.4146    0.7102
Pt    0.4854    0.4623    0.6657
Pt    0.4832    0.4604    0.7120
Pt    0.4849    0.4842    0.6432
Pt    0.4170    0.5068    0.7335
Pt    0.3024    0.3042    0.6429
Pt    0.3025    0.3039    0.6882
Pt    0.3023    0.3018    0.7326
Pt    0.2995    0.3518    0.6839
Pt    0.3049    0.3501    0.7349
Pt    0.3041    0.3931    0.6881
Pt    0.3055    0.3921    0.7359
Pt    0.3036    0.4372    0.6434
Pt    0.3033    0.4365    0.6882
Pt    0.3035    0.4382    0.7339
Pt    0.3020    0.4834    0.6433
Pt    0.3024    0.4832    0.6875
Pt    0.3022    0.4830    0.7340
Pt    0.3495    0.3036    0.6882
Pt    0.3499    0.3034    0.7345
Pt    0.3488    0.3477    0.6897
Pt    0.3487    0.4374    0.6904
Pt    0.3488    0.4382    0.7358
Pt    0.3491    0.4856    0.6863
Pt    0.3488    0.4847    0.7326
Pt    0.3929    0.3024    0.6896
Pt    0.3933    0.3032    0.7335
Pt    0.3909    0.4364    0.6874
Pt    0.3916    0.4374    0.7358
Pt    0.3935    0.4840    0.7337
Pt    0.4378    0.3037    0.6426
Pt    0.4384    0.3017    0.6887
Pt    0.4371    0.3037    0.7346
Pt    0.4365    0.3481    0.6904
Pt    0.4378    0.3502    0.7345
Pt    0.4381    0.3923    0.6881
Pt    0.4384    0.4375    0.6432
Pt    0.4382    0.4373    0.6892
Pt    0.4366    0.4364    0.7340
Pt    0.4379    0.4833    0.6431
Pt    0.4387    0.4852    0.6887
Pt    0.4393    0.4841    0.7328
Pt    0.4835    0.3062    0.6429
Pt    0.5063    0.4617    0.7339
Pt    0.4363    0.5070    0.6652
Pt    0.3034    0.5068    0.7108
Pt    0.2575    0.3026    0.7344
Pt    0.5070    0.3709    0.7346
Pt    0.4600    0.4373    0.7569
Pt    0.2819    0.3932    0.7570
Pt    0.2813    0.5066    0.7336
Pt    0.3256    0.4837    0.7566
Pt    0.5057    0.3702    0.6859
Pt    0.5070    0.4839    0.7097
Pt    0.5059    0.3919    0.7103
Pt    0.5058    0.3485    0.7117
Pt    0.5071    0.4150    0.7337
Pt    0.5070    0.3268    0.7345
Pt    0.4573    0.3927    0.7563
Pt    0.2579    0.3253    0.7566
Pt    0.4840    0.3269    0.7570
Pt    0.3256    0.5069    0.7335
Pt    0.3265    0.4376    0.7571
Pt    0.4150    0.4835    0.7570
Pt    0.4841    0.4143    0.7569
Pt    0.3937    0.4612    0.7565
Pt    0.4403    0.2795    0.7566
Pt    0.2812    0.4369    0.7573
Pt    0.2811    0.2799    0.7801
Pt    0.2811    0.2801    0.8270
Pt    0.2819    0.2797    0.8707
Pt    0.2809    0.3259    0.7815
Pt    0.2798    0.3270    0.8269
Pt    0.2785    0.3280    0.8693
Pt    0.2809    0.3701    0.7806
Pt    0.2809    0.4145    0.7806
Pt    0.2816    0.4154    0.8273
Pt    0.2801    0.4595    0.7813
Pt    0.2822    0.4574    0.8270
Pt    0.2823    0.4603    0.8708
Pt    0.4595    0.2575    0.8468
Pt    0.4603    0.4840    0.7574
Pt    0.3709    0.2581    0.8042
Pt    0.3262    0.2805    0.7800
Pt    0.3260    0.2790    0.8273
Pt    0.3262    0.3261    0.7805
Pt    0.3262    0.3276    0.8254
Pt    0.3273    0.3259    0.8703
Pt    0.3269    0.3699    0.8248
Pt    0.3274    0.4141    0.7800
Pt    0.3291    0.4139    0.8225
Pt    0.3267    0.4608    0.7802
Pt    0.3281    0.4612    0.8267
Pt    0.3284    0.4607    0.8709
Pt    0.4148    0.2576    0.8051
Pt    0.4842    0.4601    0.7580
Pt    0.2585    0.4825    0.8261
Pt    0.3711    0.2790    0.7796
Pt    0.3710    0.2810    0.8272
Pt    0.3720    0.3268    0.7803
Pt    0.3717    0.3260    0.8261
Pt    0.3713    0.4603    0.7799
Pt    0.3710    0.4608    0.8266
Pt    0.3252    0.2573    0.8027
Pt    0.4147    0.2804    0.7805
Pt    0.4138    0.2792    0.8301
Pt    0.4146    0.3261    0.7797
Pt    0.4177    0.3256    0.8261
Pt    0.4154    0.4166    0.8266
Pt    0.4139    0.4626    0.7796
Pt    0.4151    0.4618    0.8279
Pt    0.2575    0.3037    0.7801
Pt    0.2583    0.4818    0.7797
Pt    0.4612    0.2803    0.7824
Pt    0.4613    0.2822    0.8246
Pt    0.4608    0.2795    0.8719
Pt    0.4611    0.3271    0.7805
Pt    0.4620    0.3276    0.8273
Pt    0.4624    0.3286    0.8724
Pt    0.4603    0.3713    0.7818
Pt    0.4609    0.3695    0.8264
Pt    0.4581    0.4152    0.7796
Pt    0.4615    0.4161    0.8289
Pt    0.4609    0.4607    0.7795
Pt    0.4630    0.4601    0.8274
Pt    0.4600    0.4613    0.8727
Pt    0.2588    0.4140    0.8049
Pt    0.4372    0.2580    0.7792
Pt    0.2584    0.3916    0.7809
Pt    0.5072    0.2583    0.8492
Pt    0.5067    0.3486    0.7574
Pt    0.4827    0.3708    0.7579
Pt    0.3479    0.2588    0.8257
Pt    0.4836    0.2572    0.8271
Pt    0.4845    0.4593    0.8505
Pt    0.3251    0.3023    0.7576
Pt    0.4850    0.4606    0.8020
Pt    0.3036    0.3024    0.7808
Pt    0.4853    0.4138    0.8048
Pt    0.2582    0.4845    0.8722
Pt    0.4159    0.5035    0.8258
Pt    0.2588    0.4376    0.8728
Pt    0.3041    0.3040    0.8286
Pt    0.4847    0.3708    0.8048
Pt    0.4840    0.4829    0.8721
Pt    0.2805    0.3024    0.8050
Pt    0.2791    0.3038    0.8490
Pt    0.4848    0.4844    0.8250
Pt    0.2815    0.3480    0.8045
Pt    0.4855    0.4835    0.7798
Pt    0.2802    0.3924    0.8069
Pt    0.4850    0.4378    0.8270
Pt    0.2809    0.4374    0.8038
Pt    0.2814    0.4361    0.8509
Pt    0.4832    0.4380    0.7811
Pt    0.2803    0.4840    0.8025
Pt    0.2823    0.4841    0.8476
Pt    0.4828    0.3930    0.8271
Pt    0.3254    0.3019    0.8044
Pt    0.3283    0.3017    0.8503
Pt    0.4844    0.3934    0.7820
Pt    0.3273    0.3502    0.8004
Pt    0.3265    0.3485    0.8497
Pt    0.3267    0.3921    0.8013
Pt    0.4848    0.3496    0.8293
Pt    0.3267    0.4366    0.8020
Pt    0.3280    0.4382    0.8483
Pt    0.4836    0.3492    0.7826
Pt    0.3264    0.4835    0.8032
Pt    0.3284    0.4844    0.8479
Pt    0.4854    0.3048    0.8723
Pt    0.3725    0.3039    0.8030
Pt    0.4842    0.3031    0.8267
Pt    0.3713    0.4372    0.8035
Pt    0.4855    0.3034    0.7816
Pt    0.3725    0.4841    0.8045
Pt    0.4375    0.4834    0.8701
Pt    0.4162    0.3034    0.8043
Pt    0.4397    0.4832    0.8257
Pt    0.4174    0.4397    0.8045
Pt    0.4154    0.4371    0.8496
Pt    0.4391    0.4834    0.7807
Pt    0.4165    0.4833    0.8029
Pt    0.4366    0.4386    0.8720
Pt    0.4615    0.3056    0.8031
Pt    0.4601    0.3037    0.8498
Pt    0.4391    0.4387    0.8269
Pt    0.4586    0.3496    0.8040
Pt    0.4379    0.4384    0.7798
Pt    0.4620    0.3942    0.8042
Pt    0.4390    0.3932    0.8272
Pt    0.4623    0.4363    0.8046
Pt    0.4622    0.4354    0.8523
Pt    0.4376    0.3495    0.8260
Pt    0.4621    0.4845    0.8033
Pt    0.4609    0.4834    0.8491
Pt    0.4346    0.3498    0.7795
Pt    0.2574    0.3707    0.8063
Pt    0.3023    0.3033    0.8699
Pt    0.4370    0.3032    0.8709
Pt    0.2804    0.5067    0.7793
Pt    0.4378    0.3018    0.8254
Pt    0.3725    0.3039    0.7575
Pt    0.4374    0.3036    0.7805
Pt    0.3486    0.2792    0.7580
Pt    0.4850    0.3260    0.8498
Pt    0.3928    0.4845    0.7804
Pt    0.2574    0.3025    0.8264
Pt    0.2591    0.5067    0.8014
Pt    0.3937    0.4385    0.8278
Pt    0.3037    0.2805    0.8039
Pt    0.3047    0.2785    0.8489
Pt    0.3937    0.4364    0.7824
Pt    0.3036    0.3265    0.8039
Pt    0.3029    0.3268    0.8490
Pt    0.3939    0.3038    0.8279
Pt    0.3041    0.3707    0.8044
Pt    0.3930    0.3038    0.7816
Pt    0.3035    0.4152    0.8031
Pt    0.3496    0.4849    0.8259
Pt    0.3042    0.4594    0.8039
Pt    0.3051    0.4608    0.8490
Pt    0.3487    0.4843    0.7800
Pt    0.3928    0.5067    0.8039
Pt    0.4377    0.3268    0.7579
Pt    0.3495    0.4376    0.8246
Pt    0.3480    0.2795    0.8019
Pt    0.3507    0.4341    0.7807
Pt    0.3503    0.3275    0.8014
Pt    0.3485    0.3250    0.8470
Pt    0.3498    0.3484    0.8254
Pt    0.3494    0.4608    0.8025
Pt    0.3491    0.3034    0.8256
Pt    0.2579    0.4361    0.8267
Pt    0.3485    0.3043    0.7792
Pt    0.3935    0.2804    0.8047
Pt    0.3050    0.4833    0.8732
Pt    0.3956    0.3269    0.8049
Pt    0.3037    0.4842    0.8266
Pt    0.3943    0.4616    0.8056
Pt    0.3043    0.4832    0.7802
Pt    0.2589    0.3262    0.8040
Pt    0.3059    0.4375    0.8709
Pt    0.4373    0.2797    0.8027
Pt    0.4382    0.2782    0.8509
Pt    0.3054    0.4364    0.8280
Pt    0.4378    0.3264    0.8023
Pt    0.4397    0.3270    0.8486
Pt    0.4383    0.3720    0.8032
Pt    0.3051    0.4376    0.7791
Pt    0.4370    0.4148    0.8037
Pt    0.4377    0.4159    0.8517
Pt    0.3046    0.3946    0.8276
Pt    0.4408    0.4611    0.8032
Pt    0.4386    0.4580    0.8484
Pt    0.3043    0.3939    0.7809
Pt    0.4368    0.5050    0.8486
Pt    0.3494    0.5063    0.8030
Pt    0.3018    0.3502    0.8287
Pt    0.4847    0.2798    0.8035
Pt    0.4836    0.2804    0.8500
Pt    0.3035    0.3486    0.7800
Pt    0.4840    0.3262    0.8049
Pt    0.4389    0.5067    0.8036
Pt    0.2580    0.4596    0.8491
Pt    0.2581    0.3482    0.7815
Pt    0.5072    0.4847    0.8041
Pt    0.4613    0.3030    0.7598
Pt    0.5064    0.3268    0.7797
Pt    0.3279    0.5052    0.8725
Pt    0.4620    0.5060    0.8261
Pt    0.4858    0.5069    0.8491
Pt    0.4602    0.3484    0.7576
Pt    0.3953    0.2806    0.7575
Pt    0.3044    0.4611    0.7580
Pt    0.2808    0.3482    0.7578
Pt    0.5070    0.5058    0.8730
Pt    0.3247    0.5064    0.8250
Pt    0.3708    0.4370    0.7586
Pt    0.4597    0.5067    0.8715
Pt    0.3038    0.3260    0.7584
Pt    0.5070    0.4149    0.8271
Pt    0.2578    0.4372    0.7801
Pt    0.5061    0.4167    0.7812
Pt    0.5072    0.3478    0.8047
Pt    0.5066    0.4385    0.8044
Pt    0.5056    0.2799    0.8727
Pt    0.5059    0.4368    0.8491
Pt    0.2600    0.2797    0.8486
Pt    0.3051    0.5051    0.8508
Pt    0.4162    0.5056    0.7795
Pt    0.2807    0.4828    0.7582
Pt    0.2582    0.4148    0.7578
Pt    0.5072    0.4392    0.7579
Pt    0.5073    0.3026    0.7577
Pt    0.5065    0.3941    0.7574
Pt    0.3039    0.2794    0.7577
Pt    0.3495    0.4616    0.7588
Pt    0.3267    0.3479    0.7585
Pt    0.3053    0.3719    0.7597
Pt    0.4175    0.3026    0.7587
Pt    0.4826    0.5055    0.7574
Pt    0.4141    0.4378    0.7574
Pt    0.4849    0.2792    0.7575
Pt    0.2816    0.2794    0.9139
Pt    0.2821    0.2804    0.9605
Pt    0.2792    0.3259    0.9137
Pt    0.2812    0.3251    0.9590
Pt    0.2823    0.3698    0.9590
Pt    0.2814    0.4154    0.9607
Pt    0.2803    0.4617    0.9150
Pt    0.2828    0.4608    0.9622
Pt    0.2583    0.4592    0.8929
Pt    0.3272    0.4595    0.0065
Pt    0.3287    0.2797    0.9130
Pt    0.3278    0.2788    0.9602
Pt    0.3240    0.3265    0.9137
Pt    0.3282    0.3250    0.9607
Pt    0.3286    0.3715    0.9587
Pt    0.3291    0.4154    0.9160
Pt    0.3285    0.4142    0.9613
Pt    0.3293    0.4589    0.9147
Pt    0.3264    0.4611    0.9605
Pt    0.3718    0.2815    0.0066
Pt    0.4400    0.4832    0.0071
Pt    0.3729    0.2795    0.9594
Pt    0.3661    0.3293    0.9597
Pt    0.3738    0.4603    0.9619
Pt    0.4623    0.2579    0.9394
Pt    0.4167    0.2808    0.9613
Pt    0.4167    0.3246    0.9174
Pt    0.4147    0.3274    0.9634
Pt    0.4172    0.4610    0.9615
Pt    0.2587    0.3915    0.9590
Pt    0.4610    0.2812    0.9152
Pt    0.4615    0.2819    0.9613
Pt    0.4631    0.3279    0.9135
Pt    0.4618    0.3275    0.9611
Pt    0.4616    0.3723    0.9600
Pt    0.4620    0.4152    0.9607
Pt    0.4600    0.4604    0.9156
Pt    0.4609    0.4607    0.9596
Pt    0.4856    0.4380    0.0066
Pt    0.3292    0.4143    0.0046
Pt    0.4848    0.3022    0.0061
Pt    0.4630    0.2584    0.9838
Pt    0.4163    0.2576    0.9372
Pt    0.4384    0.4370    0.0072
Pt    0.2586    0.3259    0.9372
Pt    0.2600    0.4379    0.9609
Pt    0.2574    0.4822    0.9151
Pt    0.4385    0.2601    0.9165
Pt    0.3723    0.2596    0.9353
Pt    0.2592    0.4151    0.9385
Pt    0.2790    0.3037    0.8927
Pt    0.2808    0.3032    0.9357
Pt    0.2824    0.3047    0.9829
Pt    0.2827    0.3484    0.9352
Pt    0.2800    0.3456    0.9815
Pt    0.2811    0.3915    0.9836
Pt    0.2829    0.4386    0.8941
Pt    0.2806    0.4373    0.9357
Pt    0.2818    0.4364    0.9836
Pt    0.2800    0.4840    0.8929
Pt    0.2815    0.4838    0.9380
Pt    0.2824    0.4834    0.9861
Pt    0.3262    0.3050    0.8918
Pt    0.3268    0.3029    0.9361
Pt    0.3264    0.3033    0.9861
Pt    0.3274    0.3476    0.9382
Pt    0.3272    0.3490    0.9831
Pt    0.3262    0.3927    0.9373
Pt    0.3285    0.3922    0.9826
Pt    0.3307    0.4362    0.8931
Pt    0.3277    0.4377    0.9396
Pt    0.3273    0.4372    0.9827
Pt    0.3325    0.4835    0.8946
Pt    0.3314    0.4835    0.9360
Pt    0.3270    0.4845    0.9839
Pt    0.3735    0.3039    0.9382
Pt    0.3699    0.3051    0.9831
Pt    0.3731    0.4374    0.9396
Pt    0.3721    0.4838    0.9840
Pt    0.4157    0.3040    0.9397
Pt    0.4163    0.3042    0.9859
Pt    0.4166    0.3491    0.9385
Pt    0.4164    0.4374    0.9401
Pt    0.4164    0.4371    0.9818
Pt    0.4167    0.4849    0.9372
Pt    0.4178    0.4843    0.9840
Pt    0.4602    0.3035    0.8924
Pt    0.4616    0.3056    0.9380
Pt    0.4619    0.3028    0.9833
Pt    0.4624    0.3485    0.9366
Pt    0.4621    0.3505    0.9841
Pt    0.4642    0.3934    0.9391
Pt    0.4606    0.3930    0.9847
Pt    0.4611    0.4382    0.8931
Pt    0.4624    0.4368    0.9349
Pt    0.4632    0.4378    0.9839
Pt    0.4596    0.4850    0.8929
Pt    0.4615    0.4845    0.9386
Pt    0.4611    0.4845    0.9842
Pt    0.2587    0.2814    0.9387
Pt    0.3501    0.2571    0.0040
Pt    0.3932    0.4844    0.0063
Pt    0.2821    0.2787    0.0068
Pt    0.2578    0.4820    0.9605
Pt    0.3952    0.2576    0.9602
Pt    0.4584    0.2575    0.8931
Pt    0.4625    0.4163    0.0072
Pt    0.2586    0.4606    0.9843
Pt    0.4863    0.2576    0.9625
Pt    0.2579    0.3697    0.9823
Pt    0.2590    0.3035    0.9614
Pt    0.3061    0.2789    0.8914
Pt    0.3054    0.2811    0.9372
Pt    0.3055    0.2809    0.9831
Pt    0.3027    0.3265    0.8901
Pt    0.3035    0.3259    0.9378
Pt    0.3058    0.3270    0.9830
Pt    0.3039    0.3707    0.9360
Pt    0.3056    0.3712    0.9829
Pt    0.3048    0.4151    0.9360
Pt    0.3045    0.4142    0.9829
Pt    0.3065    0.4595    0.8931
Pt    0.3054    0.4608    0.9378
Pt    0.3045    0.4595    0.9846
Pt    0.4624    0.3257    0.0069
Pt    0.4831    0.2583    0.9161
Pt    0.3038    0.3035    0.0071
Pt    0.3499    0.2822    0.9366
Pt    0.3511    0.2801    0.9819
Pt    0.3488    0.3238    0.9348
Pt    0.3492    0.3279    0.9860
Pt    0.3506    0.4154    0.9396
Pt    0.3508    0.4602    0.9396
Pt    0.3510    0.4593    0.9839
Pt    0.4844    0.4375    0.9600
Pt    0.2806    0.3694    0.0060
Pt    0.3953    0.2814    0.9383
Pt    0.3941    0.2820    0.9844
Pt    0.3943    0.3268    0.9384
Pt    0.3942    0.4622    0.9382
Pt    0.3940    0.4593    0.9843
Pt    0.4873    0.4364    0.9138
Pt    0.4389    0.2815    0.9381
Pt    0.4388    0.2804    0.9848
Pt    0.4390    0.3258    0.8932
Pt    0.4384    0.3262    0.9383
Pt    0.4387    0.3278    0.9850
Pt    0.4389    0.3711    0.9391
Pt    0.4363    0.3705    0.9850
Pt    0.4401    0.4144    0.9365
Pt    0.4389    0.4158    0.9844
Pt    0.4376    0.4612    0.8938
Pt    0.4387    0.4613    0.9375
Pt    0.4392    0.4606    0.9851
Pt    0.4871    0.3927    0.9605
Pt    0.4842    0.3499    0.9619
Pt    0.4842    0.3055    0.9617
Pt    0.4832    0.2805    0.8939
Pt    0.4860    0.2805    0.9391
Pt    0.4854    0.2809    0.9827
Pt    0.4845    0.3290    0.9392
Pt    0.4850    0.3259    0.9845
Pt    0.4861    0.3699    0.9370
Pt    0.4856    0.3738    0.9839
Pt    0.4860    0.4141    0.9359
Pt    0.4855    0.4162    0.9835
Pt    0.4838    0.4580    0.8921
Pt    0.4832    0.4598    0.9378
Pt    0.4855    0.4620    0.9833
Pt    0.4827    0.4827    0.9146
Pt    0.4843    0.4844    0.9600
Pt    0.4388    0.2587    0.9614
Pt    0.3029    0.3030    0.9133
Pt    0.3055    0.3037    0.9596
Pt    0.3042    0.3480    0.9605
Pt    0.3039    0.3926    0.9593
Pt    0.3068    0.4383    0.9159
Pt    0.3035    0.4370    0.9603
Pt    0.3058    0.4821    0.9146
Pt    0.3042    0.4836    0.9609
Pt    0.3501    0.3028    0.9600
Pt    0.3509    0.4370    0.9172
Pt    0.3520    0.4374    0.9622
Pt    0.3487    0.4834    0.9605
Pt    0.3933    0.3042    0.9626
Pt    0.3953    0.4380    0.9616
Pt    0.3943    0.4837    0.9615
Pt    0.4382    0.3029    0.9160
Pt    0.4382    0.3046    0.9614
Pt    0.4388    0.3489    0.9152
Pt    0.4387    0.3496    0.9621
Pt    0.4385    0.3929    0.9613
Pt    0.4381    0.4373    0.9151
Pt    0.4400    0.4379    0.9600
Pt    0.4380    0.4851    0.9155
Pt    0.4387    0.4841    0.9608
Pt    0.4849    0.3050    0.9147
Pt    0.2582    0.5068    0.8935
Pt    0.3050    0.3925    0.0063
Pt    0.5069    0.3265    0.0070
Pt    0.3489    0.4821    0.0067
Pt    0.4840    0.2579    0.0072
Pt    0.3734    0.4591    0.0062
Pt    0.3059    0.5056    0.9390
Pt    0.5066    0.4606    0.9145
Pt    0.5067    0.4848    0.9832
Pt    0.2588    0.2782    0.8928
Pt    0.3049    0.5060    0.8944
Pt    0.2583    0.5056    0.9385
Pt    0.3031    0.3489    0.0055
Pt    0.5066    0.3060    0.8932
Pt    0.3285    0.2584    0.9357
Pt    0.3504    0.5058    0.9380
Pt    0.2574    0.2795    0.9831
Pt    0.3279    0.5071    0.9147
Pt    0.4840    0.5064    0.9850
Pt    0.4152    0.4593    0.0069
Pt    0.5070    0.3054    0.9381
Pt    0.5064    0.3277    0.9134
Pt    0.5066    0.4604    0.9601
Pt    0.5071    0.3495    0.9842
Pt    0.3733    0.5062    0.9591
Pt    0.4842    0.5065    0.9389
Pt    0.2809    0.5044    0.9618
Pt    0.3042    0.5067    0.9846
Pt    0.2813    0.2573    0.9373
Pt    0.5058    0.2571    0.8945
Pt    0.4159    0.2590    0.9831
Pt    0.4387    0.2578    0.0066
Pt    0.2822    0.2572    0.9834
Pt    0.3501    0.4376    0.0064
Pt    0.4383    0.3485    0.0073
Pt    0.4620    0.4608    0.0065
Pt    0.4859    0.3941    0.0069
Pt    0.3285    0.3712    0.0063
Pt    0.2577    0.4849    0.0063
Pt    0.3934    0.2576    0.0058
Pt    0.2805    0.5070    0.0073
Pt    0.3048    0.4363    0.0050
Pt    0.3280    0.5068    0.0065
Pt    0.3926    0.3039    0.0070
Pt    0.4371    0.3946    0.0070
Pt    0.4610    0.3718    0.0073
Pt    0.3263    0.2806    0.0072
Pt    0.4369    0.6648    0.0092
Pt    0.2825    0.5521    0.0533
Pt    0.2800    0.5545    0.0977
Pt    0.2577    0.5524    0.0754
Pt    0.2808    0.5988    0.0534
Pt    0.2582    0.7354    0.0755
Pt    0.2815    0.6438    0.0541
Pt    0.4616    0.5082    0.0528
Pt    0.2817    0.6882    0.0538
Pt    0.2800    0.6868    0.0987
Pt    0.2811    0.5081    0.0988
Pt    0.2813    0.7348    0.0527
Pt    0.2823    0.7343    0.0993
Pt    0.2574    0.7333    0.1216
Pt    0.3276    0.5520    0.0545
Pt    0.3272    0.5529    0.0990
Pt    0.4379    0.5759    0.0520
Pt    0.3288    0.5989    0.0507
Pt    0.3289    0.5971    0.0964
Pt    0.2574    0.7124    0.0539
Pt    0.3276    0.6427    0.0534
Pt    0.2574    0.5072    0.1214
Pt    0.3291    0.6877    0.0525
Pt    0.3263    0.6862    0.0971
Pt    0.2591    0.6206    0.0554
Pt    0.3264    0.7338    0.0542
Pt    0.3265    0.7351    0.1005
Pt    0.2584    0.7337    0.0303
Pt    0.3729    0.5522    0.0540
Pt    0.3714    0.6881    0.0530
Pt    0.2587    0.6213    0.0078
Pt    0.3706    0.7345    0.0537
Pt    0.5062    0.5077    0.0080
Pt    0.4156    0.5540    0.0524
Pt    0.2576    0.5759    0.0546
Pt    0.4153    0.6875    0.0537
Pt    0.4163    0.6886    0.0989
Pt    0.3271    0.7342    0.0084
Pt    0.4162    0.7335    0.0534
Pt    0.3720    0.5079    0.0552
Pt    0.4615    0.5530    0.0552
Pt    0.4616    0.5528    0.0993
Pt    0.2581    0.5076    0.0770
Pt    0.4610    0.5970    0.0532
Pt    0.2581    0.5978    0.0772
Pt    0.4609    0.6435    0.0549
Pt    0.2582    0.5072    0.0291
Pt    0.4622    0.6890    0.0532
Pt    0.4641    0.6882    0.1030
Pt    0.2574    0.6872    0.1193
Pt    0.4618    0.7345    0.0544
Pt    0.4617    0.7337    0.1001
Pt    0.3494    0.5298    0.0538
Pt    0.4387    0.5755    0.0995
Pt    0.4381    0.5316    0.0992
Pt    0.2574    0.5291    0.0531
Pt    0.4387    0.5317    0.0547
Pt    0.4151    0.6876    0.0084
Pt    0.2574    0.7569    0.0982
Pt    0.4848    0.7098    0.1000
Pt    0.3495    0.5073    0.0311
Pt    0.5071    0.5993    0.0531
Pt    0.4844    0.7122    0.0525
Pt    0.4385    0.6221    0.0549
Pt    0.3931    0.7097    0.0529
Pt    0.2822    0.5310    0.0315
Pt    0.2821    0.5290    0.0755
Pt    0.2814    0.5314    0.1218
Pt    0.2810    0.5761    0.0293
Pt    0.2809    0.5769    0.0759
Pt    0.2805    0.5777    0.1212
Pt    0.2820    0.6205    0.0299
Pt    0.2802    0.6654    0.0311
Pt    0.2819    0.6652    0.0758
Pt    0.2818    0.7115    0.0311
Pt    0.2817    0.7112    0.0745
Pt    0.2813    0.7110    0.1206
Pt    0.3273    0.5305    0.0293
Pt    0.3285    0.5293    0.0772
Pt    0.3267    0.5295    0.1218
Pt    0.3275    0.5753    0.0301
Pt    0.3290    0.5772    0.0737
Pt    0.3265    0.5739    0.1192
Pt    0.3296    0.6215    0.0287
Pt    0.3281    0.6192    0.0741
Pt    0.3291    0.6636    0.0281
Pt    0.3303    0.6640    0.0748
Pt    0.3272    0.7104    0.0302
Pt    0.3276    0.7113    0.0767
Pt    0.3268    0.7108    0.1198
Pt    0.3716    0.5294    0.0307
Pt    0.3729    0.5752    0.0764
Pt    0.3716    0.7094    0.0298
Pt    0.3724    0.7101    0.0767
Pt    0.4163    0.5292    0.0314
Pt    0.4153    0.5280    0.0759
Pt    0.4152    0.5758    0.0298
Pt    0.4137    0.5756    0.0762
Pt    0.4171    0.6645    0.0771
Pt    0.4146    0.7104    0.0305
Pt    0.4166    0.7109    0.0761
Pt    0.4618    0.5293    0.0302
Pt    0.4612    0.5302    0.0776
Pt    0.4609    0.5300    0.1214
Pt    0.4596    0.5757    0.0294
Pt    0.4615    0.5745    0.0761
Pt    0.4621    0.5759    0.1213
Pt    0.4614    0.6204    0.0314
Pt    0.4612    0.6193    0.0773
Pt    0.4619    0.6655    0.0301
Pt    0.4628    0.6657    0.0788
Pt    0.4619    0.7113    0.0292
Pt    0.4598    0.7121    0.0775
Pt    0.4603    0.7121    0.1221
Pt    0.4391    0.6675    0.0542
Pt    0.3924    0.5779    0.0528
Pt    0.4377    0.5763    0.0077
Pt    0.4608    0.6425    0.0078
Pt    0.3945    0.5293    0.0546
Pt    0.4395    0.6674    0.0989
Pt    0.3494    0.7111    0.0535
Pt    0.4394    0.7107    0.0522
Pt    0.3496    0.5734    0.0980
Pt    0.3545    0.5783    0.0492
Pt    0.4359    0.7136    0.1017
Pt    0.4365    0.5092    0.1198
Pt    0.3046    0.5529    0.0299
Pt    0.3050    0.5526    0.0755
Pt    0.3028    0.5535    0.1209
Pt    0.3048    0.5979    0.0304
Pt    0.3035    0.5986    0.0752
Pt    0.3049    0.6427    0.0305
Pt    0.3038    0.6427    0.0749
Pt    0.3053    0.6878    0.0303
Pt    0.3058    0.6863    0.0752
Pt    0.3040    0.6873    0.1207
Pt    0.3037    0.7342    0.0300
Pt    0.3044    0.7330    0.0765
Pt    0.3059    0.7339    0.1227
Pt    0.3506    0.5543    0.0298
Pt    0.3511    0.5521    0.0766
Pt    0.3507    0.5986    0.0733
Pt    0.3505    0.6871    0.0285
Pt    0.3498    0.6891    0.0770
Pt    0.3492    0.7352    0.0308
Pt    0.3495    0.7339    0.0792
Pt    0.3922    0.5528    0.0307
Pt    0.3926    0.5512    0.0763
Pt    0.3950    0.6870    0.0764
Pt    0.3920    0.7334    0.0306
Pt    0.3942    0.7332    0.0757
Pt    0.4388    0.5519    0.0306
Pt    0.4362    0.5539    0.0777
Pt    0.4376    0.5525    0.1217
Pt    0.4375    0.6001    0.0310
Pt    0.4387    0.5966    0.0748
Pt    0.4367    0.6447    0.0328
Pt    0.4407    0.6434    0.0766
Pt    0.4395    0.6882    0.0288
Pt    0.4402    0.6888    0.0776
Pt    0.4396    0.6891    0.1222
Pt    0.4384    0.7337    0.0301
Pt    0.4379    0.7342    0.0775
Pt    0.4841    0.5531    0.0317
Pt    0.4857    0.5533    0.0760
Pt    0.4841    0.5516    0.1211
Pt    0.4843    0.5963    0.0291
Pt    0.4829    0.5986    0.0771
Pt    0.4855    0.6417    0.0305
Pt    0.4871    0.6446    0.0788
Pt    0.4853    0.6883    0.0307
Pt    0.4843    0.6880    0.0772
Pt    0.4847    0.7347    0.0305
Pt    0.4843    0.7352    0.0773
Pt    0.4852    0.7339    0.1227
Pt    0.4838    0.6661    0.0542
Pt    0.3075    0.5286    0.0537
Pt    0.3056    0.5291    0.0990
Pt    0.4835    0.6216    0.0554
Pt    0.3050    0.5764    0.0531
Pt    0.3050    0.5759    0.0967
Pt    0.4842    0.5763    0.0992
Pt    0.3044    0.6205    0.0530
Pt    0.4848    0.5744    0.0546
Pt    0.3063    0.6657    0.0521
Pt    0.4825    0.5283    0.0995
Pt    0.3045    0.7103    0.0535
Pt    0.3027    0.7084    0.0983
Pt    0.4849    0.5288    0.0540
Pt    0.3937    0.5307    0.0078
Pt    0.4160    0.7565    0.0286
Pt    0.4594    0.7562    0.1220
Pt    0.2576    0.5314    0.0986
Pt    0.4365    0.6214    0.0094
Pt    0.2577    0.6642    0.0555
Pt    0.2581    0.5532    0.0315
Pt    0.2818    0.6437    0.0074
Pt    0.2576    0.5983    0.0307
Pt    0.3043    0.7113    0.0080
Pt    0.5062    0.7121    0.0756
Pt    0.2578    0.6426    0.0320
Pt    0.2576    0.7564    0.0078
Pt    0.4612    0.7567    0.0764
Pt    0.4850    0.7110    0.0074
Pt    0.2811    0.7565    0.1221
Pt    0.4394    0.7569    0.0992
Pt    0.3273    0.7571    0.0777
Pt    0.4380    0.7557    0.0538
Pt    0.3043    0.7567    0.0537
Pt    0.4606    0.7564    0.0307
Pt    0.3961    0.7563    0.0528
Pt    0.4605    0.5993    0.0091
Pt    0.2579    0.7116    0.0987
Pt    0.5065    0.5545    0.0985
Pt    0.5063    0.7356    0.0526
Pt    0.2595    0.6892    0.0314
Pt    0.5068    0.5310    0.0306
Pt    0.5072    0.7109    0.0309
Pt    0.5063    0.5300    0.0772
Pt    0.5067    0.7105    0.1217
Pt    0.2594    0.5315    0.0077
Pt    0.2595    0.5767    0.0084
Pt    0.3719    0.5558    0.0077
Pt    0.3700    0.7355    0.0081
Pt    0.3040    0.5291    0.0079
Pt    0.4166    0.7335    0.0086
Pt    0.3045    0.6656    0.0081
Pt    0.4382    0.5298    0.0079
Pt    0.4605    0.7332    0.0078
Pt    0.2585    0.7091    0.0081
Pt    0.3938    0.7117    0.0077
Pt    0.5071    0.6882    0.0526
Pt    0.2833    0.6889    0.0073
Pt    0.2805    0.5557    0.1436
Pt    0.2800    0.5546    0.1877
Pt    0.2821    0.5540    0.2325
Pt    0.2804    0.5986    0.1867
Pt    0.2795    0.5996    0.2326
Pt    0.2801    0.6432    0.2334
Pt    0.2817    0.6893    0.1433
Pt    0.2794    0.6884    0.1877
Pt    0.2793    0.6889    0.2341
Pt    0.2804    0.7356    0.1437
Pt    0.2804    0.7332    0.1882
Pt    0.2798    0.7341    0.2342
Pt    0.3262    0.5530    0.1421
Pt    0.3276    0.5534    0.1855
Pt    0.3266    0.5529    0.2336
Pt    0.3252    0.5973    0.1856
Pt    0.3271    0.6001    0.2345
Pt    0.3268    0.6437    0.1888
Pt    0.3270    0.6904    0.1441
Pt    0.3249    0.6873    0.1899
Pt    0.3243    0.6879    0.2334
Pt    0.3247    0.7341    0.1884
Pt    0.3259    0.7353    0.2347
Pt    0.3693    0.5557    0.1879
Pt    0.3715    0.5543    0.2320
Pt    0.3712    0.6890    0.1875
Pt    0.3691    0.6870    0.2337
Pt    0.3711    0.7322    0.1872
Pt    0.3718    0.7349    0.2330
Pt    0.4149    0.5520    0.1886
Pt    0.4150    0.5528    0.2341
Pt    0.4168    0.5996    0.1882
Pt    0.4162    0.6853    0.1914
Pt    0.4155    0.6850    0.2361
Pt    0.4152    0.7332    0.1870
Pt    0.4160    0.7337    0.2357
Pt    0.4617    0.5520    0.1442
Pt    0.4599    0.5539    0.1876
Pt    0.4613    0.5541    0.2337
Pt    0.4631    0.5995    0.1873
Pt    0.4604    0.5994    0.2349
Pt    0.4621    0.6433    0.1878
Pt    0.4610    0.6427    0.2326
Pt    0.4587    0.6879    0.1457
Pt    0.4623    0.6887    0.1869
Pt    0.4612    0.6878    0.2363
Pt    0.4613    0.7332    0.1439
Pt    0.4608    0.7343    0.1908
Pt    0.4629    0.7347    0.2346
Pt    0.3028    0.5076    0.2572
Pt    0.2580    0.5532    0.2551
Pt    0.4142    0.5085    0.1884
Pt    0.3509    0.5072    0.2096
Pt    0.2586    0.5298    0.2317
Pt    0.4381    0.5077    0.2116
Pt    0.3696    0.5074    0.2348
Pt    0.2574    0.5302    0.1876
Pt    0.5065    0.7343    0.1445
Pt    0.2576    0.7113    0.1437
Pt    0.2799    0.6215    0.2572
Pt    0.4131    0.5768    0.2570
Pt    0.2809    0.5310    0.1653
Pt    0.2813    0.5311    0.2089
Pt    0.2576    0.5536    0.2103
Pt    0.2794    0.5786    0.1644
Pt    0.2814    0.5759    0.2112
Pt    0.2578    0.6645    0.2328
Pt    0.2815    0.6220    0.2091
Pt    0.3270    0.5305    0.2557
Pt    0.2804    0.6644    0.2091
Pt    0.4841    0.5074    0.2125
Pt    0.2813    0.7120    0.1659
Pt    0.2797    0.7108    0.2106
Pt    0.2580    0.6862    0.1635
Pt    0.3272    0.5318    0.1650
Pt    0.3274    0.5301    0.2100
Pt    0.2577    0.5303    0.1440
Pt    0.3267    0.5764    0.1639
Pt    0.3259    0.5776    0.2111
Pt    0.2574    0.5996    0.2567
Pt    0.3254    0.6190    0.2096
Pt    0.3276    0.6663    0.1655
Pt    0.3264    0.6625    0.2132
Pt    0.3714    0.5803    0.2566
Pt    0.3288    0.7149    0.1633
Pt    0.3250    0.7118    0.2119
Pt    0.2581    0.6426    0.2076
Pt    0.3722    0.5319    0.2083
Pt    0.3925    0.5081    0.2108
Pt    0.3694    0.5778    0.2094
Pt    0.5068    0.5073    0.2350
Pt    0.3716    0.7106    0.2111
Pt    0.2802    0.5308    0.2563
Pt    0.4155    0.5311    0.2112
Pt    0.5060    0.5553    0.1415
Pt    0.4164    0.5769    0.1645
Pt    0.4158    0.5771    0.2118
Pt    0.5068    0.7096    0.1658
Pt    0.4155    0.7121    0.2116
Pt    0.4837    0.6428    0.2558
Pt    0.4612    0.5291    0.1667
Pt    0.4613    0.5308    0.2123
Pt    0.3247    0.5074    0.2333
Pt    0.4631    0.5759    0.1665
Pt    0.4617    0.5775    0.2117
Pt    0.4600    0.5756    0.2573
Pt    0.4619    0.6212    0.2109
Pt    0.4385    0.5767    0.1897
Pt    0.4608    0.6659    0.2113
Pt    0.3052    0.5532    0.2559
Pt    0.4608    0.7119    0.1667
Pt    0.4596    0.7112    0.2113
Pt    0.3475    0.7120    0.2336
Pt    0.3949    0.5775    0.1888
Pt    0.4386    0.6643    0.2357
Pt    0.3052    0.5076    0.1650
Pt    0.4845    0.7119    0.2326
Pt    0.4846    0.5306    0.1885
Pt    0.4417    0.6644    0.1852
Pt    0.3473    0.7121    0.1893
Pt    0.4843    0.5287    0.1432
Pt    0.4857    0.7121    0.1893
Pt    0.4828    0.7086    0.1440
Pt    0.4366    0.5296    0.1436
Pt    0.4843    0.6652    0.2334
Pt    0.3929    0.5775    0.2343
Pt    0.3026    0.5538    0.1652
Pt    0.3045    0.5523    0.2097
Pt    0.4409    0.5765    0.1447
Pt    0.3024    0.5986    0.2115
Pt    0.4857    0.6190    0.1876
Pt    0.3030    0.6430    0.2098
Pt    0.4390    0.6208    0.1892
Pt    0.3048    0.6889    0.1647
Pt    0.3024    0.6872    0.2104
Pt    0.4376    0.7100    0.2347
Pt    0.3034    0.7357    0.1652
Pt    0.3024    0.7336    0.2117
Pt    0.4828    0.6642    0.1875
Pt    0.3486    0.5539    0.2114
Pt    0.4376    0.7111    0.1887
Pt    0.3477    0.6891    0.1660
Pt    0.3487    0.6884    0.2106
Pt    0.4375    0.7109    0.1442
Pt    0.3491    0.7361    0.2114
Pt    0.4840    0.6214    0.2345
Pt    0.3940    0.5543    0.2093
Pt    0.3487    0.6677    0.1888
Pt    0.3921    0.6870    0.2112
Pt    0.2813    0.5072    0.1873
Pt    0.3926    0.7349    0.2092
Pt    0.3930    0.7105    0.2345
Pt    0.4365    0.5541    0.1649
Pt    0.4371    0.5532    0.2121
Pt    0.4850    0.5763    0.2349
Pt    0.4399    0.5995    0.1656
Pt    0.4378    0.5993    0.2122
Pt    0.4584    0.6205    0.2569
Pt    0.4378    0.6439    0.2108
Pt    0.4376    0.6903    0.1668
Pt    0.4387    0.6866    0.2112
Pt    0.3946    0.7094    0.1881
Pt    0.4394    0.7346    0.1654
Pt    0.4377    0.7344    0.2134
Pt    0.4849    0.5772    0.1888
Pt    0.4849    0.5542    0.1658
Pt    0.4839    0.5543    0.2117
Pt    0.3922    0.5300    0.2334
Pt    0.4871    0.5987    0.2107
Pt    0.4834    0.5300    0.2336
Pt    0.4860    0.6439    0.2103
Pt    0.4378    0.5291    0.2343
Pt    0.4855    0.6876    0.1659
Pt    0.4834    0.6879    0.2107
Pt    0.4365    0.5770    0.2344
Pt    0.4829    0.7343    0.1661
Pt    0.4857    0.7342    0.2113
Pt    0.4384    0.5304    0.1880
Pt    0.3049    0.5304    0.1433
Pt    0.3041    0.5283    0.1868
Pt    0.3035    0.5297    0.2324
Pt    0.3041    0.5779    0.1444
Pt    0.3024    0.5769    0.1875
Pt    0.3043    0.5770    0.2337
Pt    0.3037    0.6195    0.1868
Pt    0.3044    0.6221    0.2332
Pt    0.3022    0.6647    0.1857
Pt    0.3027    0.6644    0.2346
Pt    0.3039    0.7121    0.1420
Pt    0.3040    0.7099    0.1878
Pt    0.3010    0.7113    0.2354
Pt    0.3500    0.5303    0.1857
Pt    0.3495    0.5307    0.2319
Pt    0.3477    0.5767    0.1865
Pt    0.3492    0.5781    0.2340
Pt    0.3018    0.6886    0.2567
Pt    0.2810    0.5079    0.1438
Pt    0.2809    0.5074    0.2345
Pt    0.2801    0.6649    0.2568
Pt    0.4612    0.5073    0.1887
Pt    0.3928    0.7327    0.2571
Pt    0.5071    0.6422    0.1866
Pt    0.2801    0.5775    0.2564
Pt    0.5073    0.6882    0.1874
Pt    0.3930    0.6858    0.2573
Pt    0.2574    0.7341    0.1662
Pt    0.5071    0.5299    0.2103
Pt    0.5073    0.6877    0.2332
Pt    0.5072    0.6217    0.2560
Pt    0.4389    0.7566    0.1892
Pt    0.4149    0.7566    0.2086
Pt    0.3496    0.7567    0.1876
Pt    0.3932    0.7569    0.2348
Pt    0.3493    0.5550    0.2570
Pt    0.4376    0.5544    0.2558
Pt    0.3255    0.7112    0.2556
Pt    0.4601    0.5316    0.2566
Pt    0.3487    0.7348    0.2570
Pt    0.3256    0.6676    0.2571
Pt    0.3239    0.7565    0.2570
Pt    0.3265    0.5779    0.2570
Pt    0.4147    0.5297    0.2558
Pt    0.3044    0.5997    0.2563
Pt    0.3060    0.6417    0.2569
Pt    0.5073    0.7111    0.2572
Pt    0.2574    0.7570    0.1437
Pt    0.2807    0.5542    0.2790
Pt    0.2808    0.5542    0.3264
Pt    0.2796    0.5550    0.3714
Pt    0.2806    0.5989    0.2819
Pt    0.2809    0.6009    0.3276
Pt    0.2812    0.6423    0.2817
Pt    0.2802    0.6879    0.2799
Pt    0.2796    0.6862    0.3275
Pt    0.2805    0.6861    0.3714
Pt    0.2802    0.7352    0.2820
Pt    0.2800    0.7347    0.3272
Pt    0.2807    0.7354    0.3717
Pt    0.3255    0.5556    0.2804
Pt    0.3273    0.5538    0.3267
Pt    0.3277    0.5554    0.3697
Pt    0.3284    0.6005    0.2781
Pt    0.3258    0.6002    0.3274
Pt    0.3290    0.6445    0.3237
Pt    0.3252    0.6891    0.2795
Pt    0.3250    0.6873    0.3257
Pt    0.3266    0.6872    0.3701
Pt    0.3250    0.7341    0.2807
Pt    0.3265    0.7348    0.3286
Pt    0.3718    0.5541    0.2808
Pt    0.3703    0.5537    0.3266
Pt    0.3700    0.6858    0.2802
Pt    0.3707    0.6883    0.3263
Pt    0.3708    0.7350    0.2805
Pt    0.3695    0.7343    0.3281
Pt    0.4161    0.5521    0.2791
Pt    0.4137    0.5527    0.3279
Pt    0.4144    0.5974    0.3258
Pt    0.4163    0.6877    0.2812
Pt    0.4143    0.6876    0.3255
Pt    0.4136    0.7341    0.2801
Pt    0.4132    0.7351    0.3287
Pt    0.4612    0.5541    0.2791
Pt    0.4600    0.5523    0.3266
Pt    0.4582    0.5533    0.3722
Pt    0.4598    0.5994    0.2801
Pt    0.4599    0.5986    0.3267
Pt    0.4581    0.6405    0.2804
Pt    0.4590    0.6415    0.3259
Pt    0.4606    0.6871    0.2810
Pt    0.4615    0.6876    0.3263
Pt    0.4626    0.6845    0.3695
Pt    0.4614    0.7351    0.2819
Pt    0.4598    0.7342    0.3273
Pt    0.4584    0.7333    0.3712
Pt    0.2809    0.5082    0.2785
Pt    0.4849    0.6895    0.2583
Pt    0.4602    0.6642    0.2579
Pt    0.3254    0.5087    0.3257
Pt    0.4826    0.5083    0.2584
Pt    0.3036    0.5079    0.3483
Pt    0.2584    0.6424    0.3051
Pt    0.2576    0.5774    0.3706
Pt    0.3011    0.7343    0.2576
Pt    0.2808    0.5074    0.3713
Pt    0.3480    0.6877    0.2582
Pt    0.2580    0.6861    0.3511
Pt    0.2813    0.5314    0.3024
Pt    0.2803    0.5318    0.3487
Pt    0.2798    0.5763    0.3032
Pt    0.2820    0.5785    0.3486
Pt    0.2822    0.6228    0.3062
Pt    0.2808    0.6646    0.3044
Pt    0.2804    0.7095    0.3057
Pt    0.2800    0.7107    0.3492
Pt    0.3245    0.5321    0.3025
Pt    0.3283    0.5309    0.3486
Pt    0.3273    0.5781    0.3033
Pt    0.3263    0.5772    0.3489
Pt    0.3281    0.6202    0.3029
Pt    0.3286    0.6641    0.2989
Pt    0.3253    0.6652    0.3477
Pt    0.3242    0.7115    0.3031
Pt    0.3260    0.7109    0.3496
Pt    0.3721    0.5294    0.3036
Pt    0.3706    0.5762    0.3038
Pt    0.3702    0.7109    0.3027
Pt    0.4157    0.5298    0.3032
Pt    0.4138    0.5755    0.3042
Pt    0.4147    0.5755    0.3487
Pt    0.4145    0.7108    0.3028
Pt    0.4603    0.5308    0.3026
Pt    0.4596    0.5294    0.3492
Pt    0.4611    0.5755    0.3019
Pt    0.4620    0.5777    0.3511
Pt    0.4594    0.6197    0.3035
Pt    0.4588    0.6644    0.3028
Pt    0.4604    0.7104    0.3034
Pt    0.4611    0.7112    0.3492
Pt    0.4612    0.5083    0.3246
Pt    0.2574    0.6876    0.2582
Pt    0.4576    0.5086    0.3725
Pt    0.2574    0.6630    0.3277
Pt    0.2581    0.5091    0.3027
Pt    0.2790    0.7122    0.2583
Pt    0.3030    0.5080    0.3021
Pt    0.2578    0.5771    0.2787
Pt    0.3032    0.5562    0.3033
Pt    0.3041    0.5557    0.3487
Pt    0.3036    0.5980    0.3045
Pt    0.3062    0.6437    0.3006
Pt    0.3034    0.6873    0.3018
Pt    0.3027    0.6871    0.3491
Pt    0.3019    0.7332    0.3059
Pt    0.3040    0.7357    0.3499
Pt    0.3477    0.5541    0.3023
Pt    0.3480    0.6889    0.3016
Pt    0.3465    0.6869    0.3474
Pt    0.3488    0.7339    0.3035
Pt    0.3949    0.5529    0.3032
Pt    0.3935    0.6861    0.3027
Pt    0.3927    0.7346    0.3050
Pt    0.4378    0.5533    0.3039
Pt    0.4377    0.5540    0.3483
Pt    0.4377    0.5989    0.3018
Pt    0.4372    0.5977    0.3485
Pt    0.4350    0.6425    0.3029
Pt    0.4376    0.6891    0.3040
Pt    0.4398    0.6870    0.3489
Pt    0.4379    0.7320    0.3044
Pt    0.4357    0.7357    0.3499
Pt    0.4839    0.5544    0.3047
Pt    0.4832    0.5548    0.3489
Pt    0.4842    0.5982    0.3017
Pt    0.4821    0.6406    0.3029
Pt    0.4849    0.6870    0.3037
Pt    0.4854    0.6869    0.3499
Pt    0.4844    0.7354    0.3041
Pt    0.4834    0.7348    0.3494
Pt    0.3039    0.5315    0.2794
Pt    0.3028    0.5321    0.3273
Pt    0.3042    0.5305    0.3703
Pt    0.3023    0.5774    0.2787
Pt    0.3048    0.5773    0.3274
Pt    0.3040    0.5768    0.3713
Pt    0.3040    0.6203    0.2808
Pt    0.3054    0.6222    0.3272
Pt    0.3030    0.6647    0.2786
Pt    0.3024    0.6630    0.3265
Pt    0.3020    0.7113    0.2805
Pt    0.3031    0.7110    0.3271
Pt    0.3040    0.7115    0.3711
Pt    0.3488    0.5312    0.2809
Pt    0.3501    0.5293    0.3251
Pt    0.3506    0.5774    0.2804
Pt    0.3483    0.5766    0.3271
Pt    0.3486    0.6672    0.3236
Pt    0.3477    0.7125    0.2808
Pt    0.3478    0.7115    0.3263
Pt    0.3946    0.5283    0.2815
Pt    0.3916    0.5789    0.2810
Pt    0.3917    0.5755    0.3269
Pt    0.3920    0.7094    0.2794
Pt    0.3916    0.7107    0.3254
Pt    0.4380    0.5310    0.2800
Pt    0.4369    0.5294    0.3268
Pt    0.4360    0.5327    0.3733
Pt    0.4366    0.5766    0.2811
Pt    0.4378    0.5761    0.3245
Pt    0.4361    0.5767    0.3726
Pt    0.4345    0.6213    0.3250
Pt    0.4373    0.6654    0.2794
Pt    0.4374    0.6664    0.3259
Pt    0.4373    0.7106    0.2808
Pt    0.4376    0.7108    0.3282
Pt    0.4380    0.7106    0.3699
Pt    0.4844    0.5315    0.2802
Pt    0.4840    0.5309    0.3273
Pt    0.4827    0.5306    0.3706
Pt    0.4833    0.5764    0.2805
Pt    0.4834    0.5774    0.3269
Pt    0.4839    0.6214    0.2780
Pt    0.4818    0.6205    0.3266
Pt    0.4820    0.6639    0.2802
Pt    0.4822    0.6624    0.3260
Pt    0.4846    0.7103    0.2820
Pt    0.4820    0.7100    0.3261
Pt    0.4833    0.7091    0.3708
Pt    0.3272    0.5081    0.3715
Pt    0.2584    0.5992    0.3032
Pt    0.5071    0.6876    0.3281
Pt    0.5067    0.5083    0.3262
Pt    0.5060    0.5542    0.2817
Pt    0.2583    0.5788    0.3265
Pt    0.3717    0.5311    0.2579
Pt    0.5067    0.6434    0.2796
Pt    0.3260    0.5092    0.2785
Pt    0.4841    0.7341    0.2582
Pt    0.4862    0.5532    0.2576
Pt    0.3464    0.5074    0.3028
Pt    0.5064    0.5309    0.3037
Pt    0.5061    0.5549    0.3709
Pt    0.5065    0.7113    0.3489
Pt    0.3250    0.7559    0.3034
Pt    0.4841    0.5081    0.3033
Pt    0.2806    0.5094    0.3250
Pt    0.2578    0.5536    0.3477
Pt    0.5073    0.6862    0.2807
Pt    0.5069    0.5766    0.3492
Pt    0.4827    0.7553    0.3723
Pt    0.5062    0.6432    0.3265
Pt    0.4155    0.7564    0.2590
Pt    0.5065    0.7334    0.3266
Pt    0.3061    0.7565    0.3724
Pt    0.5069    0.7095    0.3045
Pt    0.4378    0.6879    0.2584
Pt    0.2579    0.5315    0.3710
Pt    0.4359    0.5982    0.2585
Pt    0.4379    0.7557    0.2815
Pt    0.2579    0.7107    0.3271
Pt    0.2576    0.5311    0.2799
Pt    0.4147    0.7096    0.2579
Pt    0.4384    0.7331    0.2578
Pt    0.2581    0.6650    0.2817
Pt    0.2575    0.6868    0.3045
Pt    0.5068    0.5542    0.3275
Pt    0.2578    0.5540    0.3031
Pt    0.5069    0.6005    0.3282
Pt    0.5064    0.5311    0.3487
Pt    0.4841    0.5974    0.2574
Pt    0.4379    0.5072    0.2578
Pt    0.5069    0.6662    0.2580
Pt    0.3928    0.5534    0.2578
Pt    0.3490    0.5073    0.2583
Pt    0.3697    0.7094    0.2576
Pt    0.4622    0.7115    0.2598
Pt    0.5060    0.5071    0.2804
Pt    0.2798    0.5531    0.4149
Pt    0.2799    0.5509    0.4606
Pt    0.4822    0.5075    0.3933
Pt    0.2798    0.5969    0.4607
Pt    0.4819    0.5071    0.4836
Pt    0.2781    0.6428    0.4599
Pt    0.2792    0.5527    0.5071
Pt    0.2840    0.6839    0.4156
Pt    0.2789    0.6861    0.4621
Pt    0.3693    0.5551    0.5071
Pt    0.2810    0.7336    0.4164
Pt    0.2795    0.7328    0.4611
Pt    0.2580    0.5987    0.4377
Pt    0.3288    0.5528    0.4152
Pt    0.3261    0.5522    0.4613
Pt    0.3256    0.5533    0.5060
Pt    0.3243    0.5992    0.4155
Pt    0.3257    0.5977    0.4621
Pt    0.5069    0.5314    0.4378
Pt    0.3274    0.6434    0.4601
Pt    0.2581    0.5296    0.4152
Pt    0.3274    0.6871    0.4151
Pt    0.3266    0.6868    0.4620
Pt    0.2576    0.6850    0.3949
Pt    0.3265    0.7336    0.4157
Pt    0.3278    0.7323    0.4608
Pt    0.4374    0.6658    0.5065
Pt    0.3733    0.5535    0.4619
Pt    0.3282    0.5079    0.4143
Pt    0.3710    0.6867    0.4615
Pt    0.3700    0.7329    0.4615
Pt    0.5063    0.5300    0.3916
Pt    0.4153    0.5546    0.4610
Pt    0.3921    0.7554    0.4596
Pt    0.4158    0.6872    0.4159
Pt    0.4127    0.6865    0.4604
Pt    0.2579    0.5295    0.4615
Pt    0.4168    0.7319    0.4620
Pt    0.3483    0.5073    0.4843
Pt    0.4592    0.5553    0.4153
Pt    0.4597    0.5540    0.4609
Pt    0.2587    0.7333    0.3938
Pt    0.4610    0.5991    0.4623
Pt    0.5055    0.5769    0.4358
Pt    0.4601    0.6423    0.4603
Pt    0.3041    0.7563    0.4150
Pt    0.4618    0.6836    0.4137
Pt    0.4602    0.6876    0.4600
Pt    0.5073    0.5079    0.4602
Pt    0.4598    0.7320    0.4137
Pt    0.4607    0.7330    0.4600
Pt    0.5070    0.5981    0.4602
Pt    0.5062    0.5532    0.4597
Pt    0.5054    0.6867    0.4138
Pt    0.5062    0.5072    0.4143
Pt    0.3475    0.5307    0.5068
Pt    0.5062    0.7566    0.4844
Pt    0.4342    0.5083    0.3951
Pt    0.4359    0.5775    0.4167
Pt    0.4832    0.6208    0.4611
Pt    0.4828    0.7118    0.4610
Pt    0.4378    0.7564    0.4619
Pt    0.5057    0.7563    0.4370
Pt    0.4363    0.5299    0.4612
Pt    0.4367    0.6654    0.4607
Pt    0.2796    0.5293    0.3930
Pt    0.2802    0.5292    0.4377
Pt    0.2803    0.5298    0.4844
Pt    0.2794    0.5772    0.3946
Pt    0.2796    0.5734    0.4390
Pt    0.2803    0.5748    0.4854
Pt    0.2810    0.6206    0.4829
Pt    0.2800    0.6642    0.4383
Pt    0.2808    0.6645    0.4858
Pt    0.2805    0.7102    0.3951
Pt    0.2807    0.7084    0.4389
Pt    0.2790    0.7090    0.4845
Pt    0.3274    0.5325    0.3919
Pt    0.3281    0.5293    0.4376
Pt    0.3262    0.5290    0.4838
Pt    0.3271    0.5752    0.3942
Pt    0.3262    0.5740    0.4388
Pt    0.3265    0.5762    0.4851
Pt    0.3244    0.6201    0.4381
Pt    0.3272    0.6196    0.4827
Pt    0.3275    0.6642    0.4389
Pt    0.3275    0.6652    0.4852
Pt    0.3271    0.7101    0.3928
Pt    0.3292    0.7095    0.4389
Pt    0.3254    0.7098    0.4848
Pt    0.3698    0.5290    0.4842
Pt    0.3702    0.5783    0.4394
Pt    0.3697    0.7097    0.4377
Pt    0.3728    0.7085    0.4847
Pt    0.4141    0.5324    0.4365
Pt    0.4159    0.5293    0.4841
Pt    0.4159    0.5775    0.4395
Pt    0.4144    0.5781    0.4844
Pt    0.4144    0.6645    0.4385
Pt    0.4144    0.7111    0.4372
Pt    0.4153    0.7086    0.4833
Pt    0.4604    0.5295    0.3936
Pt    0.4614    0.5291    0.4396
Pt    0.4597    0.5295    0.4834
Pt    0.4573    0.5781    0.3936
Pt    0.4598    0.5771    0.4390
Pt    0.4612    0.5759    0.4846
Pt    0.4598    0.6195    0.4370
Pt    0.4585    0.6216    0.4852
Pt    0.4613    0.6629    0.4387
Pt    0.4598    0.6646    0.4852
Pt    0.4607    0.7078    0.3926
Pt    0.4600    0.7102    0.4368
Pt    0.4596    0.7102    0.4838
Pt    0.4847    0.5765    0.4613
Pt    0.4834    0.7553    0.4619
Pt    0.5068    0.6651    0.4839
Pt    0.4594    0.7565    0.4850
Pt    0.4835    0.7074    0.4147
Pt    0.3258    0.7563    0.4846
Pt    0.4833    0.5304    0.4164
Pt    0.4828    0.6653    0.4608
Pt    0.2796    0.7563    0.4838
Pt    0.4367    0.7111    0.4134
Pt    0.4819    0.5777    0.4133
Pt    0.4365    0.6200    0.4624
Pt    0.3034    0.5526    0.3935
Pt    0.3035    0.5504    0.4375
Pt    0.3029    0.5519    0.4824
Pt    0.3012    0.5991    0.4371
Pt    0.3025    0.5973    0.4837
Pt    0.3017    0.6435    0.4391
Pt    0.3046    0.6430    0.4838
Pt    0.3044    0.6884    0.3940
Pt    0.3047    0.6872    0.4389
Pt    0.3030    0.6877    0.4842
Pt    0.3045    0.7330    0.3940
Pt    0.3045    0.7325    0.4384
Pt    0.3031    0.7335    0.4846
Pt    0.3495    0.5522    0.4389
Pt    0.3506    0.5524    0.4837
Pt    0.3460    0.5995    0.4387
Pt    0.3479    0.6868    0.4412
Pt    0.3497    0.6858    0.4848
Pt    0.3498    0.7351    0.4358
Pt    0.3491    0.7317    0.4865
Pt    0.3928    0.5558    0.4382
Pt    0.3921    0.5558    0.4858
Pt    0.3914    0.6871    0.4386
Pt    0.3937    0.7335    0.4348
Pt    0.3939    0.7329    0.4831
Pt    0.4335    0.5537    0.3964
Pt    0.4381    0.5522    0.4376
Pt    0.4373    0.5523    0.4843
Pt    0.4367    0.5988    0.4393
Pt    0.4365    0.6000    0.4882
Pt    0.4371    0.6412    0.4398
Pt    0.4371    0.6440    0.4831
Pt    0.4377    0.6866    0.3939
Pt    0.4386    0.6879    0.4364
Pt    0.4369    0.6874    0.4834
Pt    0.4363    0.7342    0.4357
Pt    0.4378    0.7344    0.4845
Pt    0.4822    0.5551    0.3920
Pt    0.4826    0.5533    0.4391
Pt    0.4822    0.5528    0.4836
Pt    0.4822    0.5990    0.4382
Pt    0.4831    0.5991    0.4854
Pt    0.4839    0.6411    0.4382
Pt    0.4832    0.6427    0.4833
Pt    0.4851    0.6862    0.4377
Pt    0.4829    0.6881    0.4834
Pt    0.4838    0.7325    0.3932
Pt    0.4833    0.7332    0.4365
Pt    0.4818    0.7339    0.4831
Pt    0.3043    0.5288    0.4147
Pt    0.3029    0.5292    0.4612
Pt    0.4383    0.5305    0.4160
Pt    0.3037    0.5752    0.4161
Pt    0.3035    0.5739    0.4601
Pt    0.4839    0.5295    0.4618
Pt    0.3045    0.6206    0.4626
Pt    0.4369    0.7088    0.4601
Pt    0.3029    0.6650    0.4617
Pt    0.4375    0.6636    0.4165
Pt    0.3046    0.7098    0.4166
Pt    0.3024    0.7109    0.4619
Pt    0.3923    0.5305    0.5064
Pt    0.3498    0.5274    0.4597
Pt    0.3933    0.7117    0.4608
Pt    0.3484    0.5770    0.4166
Pt    0.3506    0.5758    0.4637
Pt    0.4361    0.5777    0.4636
Pt    0.3497    0.7094    0.4628
Pt    0.3930    0.5782    0.4608
Pt    0.3928    0.5291    0.4605
Pt    0.3495    0.7554    0.4608
Pt    0.4823    0.7542    0.5065
Pt    0.5072    0.7335    0.4619
Pt    0.4148    0.7556    0.4379
Pt    0.2794    0.5988    0.5070
Pt    0.3037    0.7547    0.4603
Pt    0.5058    0.7325    0.4148
Pt    0.4829    0.7560    0.4150
Pt    0.2810    0.7554    0.4397
Pt    0.5058    0.6895    0.4609
Pt    0.5072    0.6637    0.4377
Pt    0.5063    0.5752    0.4850
Pt    0.4128    0.7562    0.4854
Pt    0.5065    0.7096    0.3916
Pt    0.5060    0.6439    0.4609
Pt    0.5060    0.5293    0.4842
Pt    0.5057    0.7100    0.4847
Pt    0.5069    0.7109    0.4381
Pt    0.5062    0.6210    0.4369
Pt    0.5063    0.5986    0.5072
Pt    0.5043    0.5529    0.4148
Pt    0.3278    0.7567    0.4387
Pt    0.5066    0.6212    0.4847
Pt    0.4575    0.7560    0.3926
Pt    0.5053    0.6876    0.5071
Pt    0.3029    0.5300    0.5067
Pt    0.3265    0.6874    0.5068
Pt    0.2788    0.7342    0.5062
Pt    0.4365    0.7101    0.5068
Pt    0.4600    0.6877    0.5065
Pt    0.4829    0.7114    0.5061
Pt    0.3010    0.7101    0.5072
Pt    0.3276    0.6421    0.5063
Pt    0.3044    0.6199    0.5064
Pt    0.4143    0.5543    0.5068
Pt    0.3496    0.7089    0.5073
Pt    0.2797    0.5528    0.5523
Pt    0.2810    0.5527    0.5992
Pt    0.2803    0.5993    0.5533
Pt    0.2801    0.6432    0.5562
Pt    0.2787    0.6868    0.5543
Pt    0.2808    0.6856    0.6006
Pt    0.2790    0.7328    0.5538
Pt    0.2794    0.7336    0.6000
Pt    0.3258    0.5537    0.5528
Pt    0.3286    0.5532    0.5991
Pt    0.3267    0.5992    0.5535
Pt    0.3261    0.5990    0.5990
Pt    0.3258    0.6431    0.5539
Pt    0.3257    0.6877    0.5555
Pt    0.3248    0.6889    0.6008
Pt    0.3247    0.7318    0.5532
Pt    0.3247    0.7340    0.6011
Pt    0.3689    0.5539    0.5522
Pt    0.3695    0.6874    0.5550
Pt    0.3712    0.7333    0.5550
Pt    0.4135    0.5528    0.5527
Pt    0.4141    0.6868    0.5544
Pt    0.4149    0.6856    0.5985
Pt    0.4156    0.7338    0.5542
Pt    0.4594    0.5544    0.5554
Pt    0.4591    0.5524    0.5986
Pt    0.4589    0.5985    0.5539
Pt    0.4622    0.6447    0.5541
Pt    0.4629    0.6885    0.5551
Pt    0.4620    0.6873    0.6011
Pt    0.4603    0.7338    0.5553
Pt    0.4615    0.7346    0.5996
Pt    0.4356    0.5084    0.6215
Pt    0.3036    0.6644    0.5079
Pt    0.5065    0.7332    0.5081
Pt    0.3724    0.7321    0.5077
Pt    0.2576    0.7338    0.5764
Pt    0.5058    0.7560    0.5306
Pt    0.2577    0.7568    0.6000
Pt    0.3264    0.7569    0.5308
Pt    0.2793    0.5284    0.5306
Pt    0.2809    0.5291    0.5759
Pt    0.2796    0.5305    0.6216
Pt    0.2787    0.5763    0.5286
Pt    0.2796    0.5750    0.5773
Pt    0.2813    0.5760    0.6209
Pt    0.2792    0.6204    0.5312
Pt    0.2806    0.6646    0.5295
Pt    0.2789    0.6646    0.5782
Pt    0.2799    0.7109    0.5309
Pt    0.2802    0.7106    0.5764
Pt    0.2785    0.7091    0.6224
Pt    0.3247    0.5305    0.5302
Pt    0.3266    0.5298    0.5776
Pt    0.3285    0.5311    0.6214
Pt    0.3248    0.5759    0.5298
Pt    0.3265    0.5774    0.5761
Pt    0.3275    0.5763    0.6205
Pt    0.3277    0.6202    0.5302
Pt    0.3254    0.6224    0.5766
Pt    0.3267    0.6648    0.5324
Pt    0.3228    0.6659    0.5779
Pt    0.3252    0.7104    0.5313
Pt    0.3255    0.7102    0.5788
Pt    0.3263    0.7110    0.6243
Pt    0.3703    0.5305    0.5279
Pt    0.3694    0.5768    0.5739
Pt    0.3732    0.7091    0.5309
Pt    0.3695    0.7104    0.5779
Pt    0.4138    0.5298    0.5305
Pt    0.4126    0.5307    0.5780
Pt    0.4150    0.5764    0.5295
Pt    0.4126    0.5740    0.5754
Pt    0.4160    0.6646    0.5757
Pt    0.4164    0.7096    0.5314
Pt    0.4153    0.7111    0.5768
Pt    0.4605    0.5289    0.5314
Pt    0.4587    0.5299    0.5758
Pt    0.4598    0.5309    0.6219
Pt    0.4603    0.5762    0.5309
Pt    0.4609    0.5776    0.5770
Pt    0.4598    0.5756    0.6198
Pt    0.4609    0.6215    0.5310
Pt    0.4610    0.6194    0.5768
Pt    0.4593    0.6664    0.5305
Pt    0.4639    0.6658    0.5783
Pt    0.4602    0.7094    0.5309
Pt    0.4618    0.7104    0.5778
Pt    0.4602    0.7103    0.6226
Pt    0.3711    0.5080    0.5538
Pt    0.2575    0.7339    0.5298
Pt    0.4346    0.5079    0.5781
Pt    0.3264    0.5995    0.5079
Pt    0.4367    0.5292    0.5085
Pt    0.3923    0.5080    0.5311
Pt    0.4143    0.6864    0.5094
Pt    0.2577    0.6203    0.5549
Pt    0.4153    0.7555    0.5772
Pt    0.4609    0.7562    0.5311
Pt    0.2795    0.6414    0.5085
Pt    0.4611    0.6444    0.5074
Pt    0.3010    0.5520    0.5301
Pt    0.3046    0.5542    0.5772
Pt    0.3058    0.5536    0.6208
Pt    0.3028    0.5991    0.5305
Pt    0.3024    0.5994    0.5766
Pt    0.3033    0.6434    0.5313
Pt    0.3034    0.6432    0.5773
Pt    0.3021    0.6877    0.5315
Pt    0.3013    0.6867    0.5770
Pt    0.3028    0.6876    0.6235
Pt    0.3017    0.7330    0.5299
Pt    0.3028    0.7334    0.5775
Pt    0.3047    0.7334    0.6232
Pt    0.3472    0.5527    0.5298
Pt    0.3478    0.5525    0.5757
Pt    0.3481    0.5989    0.5761
Pt    0.3481    0.6882    0.5324
Pt    0.3487    0.6874    0.5779
Pt    0.3501    0.7309    0.5317
Pt    0.3462    0.7344    0.5770
Pt    0.3913    0.5543    0.5295
Pt    0.3906    0.5539    0.5764
Pt    0.3926    0.6880    0.5758
Pt    0.3928    0.7330    0.5303
Pt    0.3925    0.7334    0.5794
Pt    0.4367    0.5519    0.5310
Pt    0.4359    0.5532    0.5770
Pt    0.4361    0.5534    0.6219
Pt    0.4351    0.5994    0.5308
Pt    0.4365    0.5971    0.5752
Pt    0.4370    0.6443    0.5301
Pt    0.4395    0.6437    0.5781
Pt    0.4363    0.6859    0.5310
Pt    0.4381    0.6875    0.5780
Pt    0.4378    0.6878    0.6215
Pt    0.4377    0.7332    0.5312
Pt    0.4380    0.7317    0.5775
Pt    0.4835    0.5525    0.5318
Pt    0.4828    0.5518    0.5769
Pt    0.4842    0.5558    0.6222
Pt    0.4833    0.5983    0.5318
Pt    0.4833    0.5983    0.5767
Pt    0.4846    0.6447    0.5316
Pt    0.4850    0.6426    0.5781
Pt    0.4840    0.6897    0.5303
Pt    0.4863    0.6892    0.5780
Pt    0.4815    0.7324    0.5317
Pt    0.4834    0.7345    0.5773
Pt    0.4841    0.7343    0.6219
Pt    0.3043    0.5303    0.5548
Pt    0.3044    0.5295    0.5995
Pt    0.3012    0.5746    0.5540
Pt    0.3029    0.5771    0.5981
[truncated: 571,596 more chars]
