# Supplementary material
Source: publisher figshare collection journal article supplement (https://rs.figshare.com/ndownloader/files/37464464)
Supplement: Supplementary file 2 [file 37464464 › Ordered_Nanoporous_Metals_SI/ONMs_Crystal_Structures/ONM_from_MOF_NDC-MIL101.cif]

data_block_1
#***********************************************************************************************
#
# On use of this cif file, please acknowledge citation to:
#
# Understanding the stability and structural properties of Ordered Nanoporous Metals towards their rational synthesis
# Jose M. Ortiz-Roldan, Salvador R. G. Balestra, Rocio Bueno-Perez, Sof�a Calero,
# Elena Garcia-Perez, C. Richard A. Catlow, A. Rabdel Ruiz-Salvador, Said Hamad
# Proc. R Soc. A 2022 
#
# Contact emails: : said@upo.es, rruisal@upo.es, c.r.a.catlow@ucl.ac.uk
#
#***********************************************************************************************

_audit_creation_date         'Tue March 22 2022'
_audit_creation_method       'generated by GDIS v0.90'


_cell_length_a            104.3080
_cell_length_b            104.3210
_cell_length_c            104.3000
_cell_angle_alpha          90.00
_cell_angle_beta           90.00
_cell_angle_gamma          90.00


_symmetry_space_group_name_H-M   'P 1'
_symmetry_Int_Tables_number       1


loop_
_atom_site_label
_atom_site_fract_x
_atom_site_fract_y
_atom_site_fract_z
Pt    0.2408    0.2396    0.1134
Pt    0.1119    0.0014    0.0742
Pt    0.1648    0.2019    0.0751
Pt    0.2395    0.1652    0.0013
Pt    0.1662    0.2027    0.0380
Pt    0.2036    0.2399    0.0014
Pt    0.1853    0.1472    0.0015
Pt    0.2404    0.2414    0.0754
Pt    0.0013    0.0941    0.0189
Pt    0.2408    0.1286    0.0012
Pt    0.0557    0.0016    0.0944
Pt    0.0024    0.1321    0.0185
Pt    0.1847    0.1850    0.0014
Pt    0.2441    0.2405    0.0388
Pt    0.2041    0.1654    0.0755
Pt    0.1309    0.0020    0.0925
Pt    0.0747    0.0013    0.0769
Pt    0.2420    0.2024    0.1131
Pt    0.0016    0.0584    0.0932
Pt    0.0199    0.0560    0.0738
Pt    0.0376    0.0012    0.1139
Pt    0.2416    0.2021    0.0380
Pt    0.2030    0.1668    0.0382
Pt    0.0384    0.0379    0.0375
Pt    0.0383    0.0374    0.0744
Pt    0.0373    0.0390    0.1142
Pt    0.0197    0.1327    0.0383
Pt    0.0386    0.0754    0.0372
Pt    0.0376    0.0764    0.0756
Pt    0.0380    0.0756    0.1139
Pt    0.1647    0.1656    0.0393
Pt    0.0391    0.1146    0.0384
Pt    0.0380    0.1134    0.0750
Pt    0.1286    0.0220    0.1135
Pt    0.0576    0.0564    0.0750
Pt    0.0208    0.0932    0.1127
Pt    0.2021    0.2033    0.1110
Pt    0.1471    0.0018    0.1121
Pt    0.0750    0.0389    0.0385
Pt    0.0749    0.0390    0.0752
Pt    0.0742    0.0394    0.1132
Pt    0.0205    0.0959    0.0753
Pt    0.0774    0.0759    0.0382
Pt    0.0752    0.0753    0.0755
Pt    0.0577    0.0186    0.0381
Pt    0.0751    0.1122    0.0366
Pt    0.0194    0.0934    0.0388
Pt    0.1321    0.0206    0.0369
Pt    0.0925    0.2419    0.1104
Pt    0.0193    0.0580    0.0373
Pt    0.2430    0.1303    0.1115
Pt    0.1139    0.0375    0.0390
Pt    0.1117    0.0387    0.0760
Pt    0.0934    0.0189    0.0758
Pt    0.1121    0.0766    0.0395
Pt    0.0174    0.2425    0.1126
Pt    0.2413    0.1284    0.0746
Pt    0.2417    0.1280    0.0382
Pt    0.1095    0.2217    0.1126
Pt    0.2418    0.1672    0.1125
Pt    0.2419    0.0930    0.1122
Pt    0.0941    0.0189    0.0388
Pt    0.1650    0.0203    0.1121
Pt    0.1466    0.1858    0.0384
Pt    0.0209    0.1663    0.1129
Pt    0.1477    0.2222    0.0383
Pt    0.1473    0.2235    0.0747
Pt    0.1472    0.2222    0.1111
Pt    0.1288    0.2413    0.1106
Pt    0.1851    0.1473    0.0394
Pt    0.1665    0.2405    0.1121
Pt    0.1840    0.1845    0.0390
Pt    0.1851    0.1846    0.0747
Pt    0.0192    0.0574    0.1127
Pt    0.1841    0.2210    0.0385
Pt    0.1847    0.2214    0.0755
Pt    0.1840    0.2204    0.1120
Pt    0.2413    0.1660    0.0756
Pt    0.2429    0.0184    0.1125
Pt    0.2243    0.1116    0.1113
Pt    0.2037    0.2037    0.0766
Pt    0.2234    0.1482    0.0382
Pt    0.2231    0.1482    0.0749
Pt    0.2234    0.1481    0.1124
Pt    0.0937    0.0579    0.0762
Pt    0.2231    0.1844    0.0380
Pt    0.2234    0.1845    0.0765
Pt    0.2225    0.1853    0.1116
Pt    0.0559    0.0216    0.1145
Pt    0.2216    0.2210    0.0387
Pt    0.2222    0.2216    0.0750
Pt    0.2217    0.2204    0.1138
Pt    0.2417    0.2041    0.0757
Pt    0.0020    0.0962    0.0941
Pt    0.1675    0.2411    0.0742
Pt    0.1658    0.2406    0.0383
Pt    0.2045    0.2400    0.0375
Pt    0.0196    0.1324    0.0747
Pt    0.0574    0.0958    0.0760
Pt    0.0566    0.0945    0.0385
Pt    0.0561    0.0200    0.0753
Pt    0.0190    0.1311    0.1119
Pt    0.0555    0.0575    0.1134
Pt    0.0950    0.0567    0.0391
Pt    0.0383    0.0193    0.0193
Pt    0.0381    0.0187    0.0561
Pt    0.0375    0.0213    0.0944
Pt    0.0385    0.0567    0.0198
Pt    0.0383    0.0560    0.0557
Pt    0.0379    0.0568    0.0943
Pt    0.0383    0.0939    0.0190
Pt    0.0387    0.0945    0.0568
Pt    0.0381    0.0952    0.0950
Pt    0.0379    0.1317    0.0188
Pt    0.0757    0.0202    0.0206
Pt    0.0757    0.0193    0.0580
Pt    0.0752    0.0195    0.0936
Pt    0.0754    0.0567    0.0201
Pt    0.0753    0.0575    0.0569
Pt    0.0750    0.0577    0.0938
Pt    0.0768    0.0939    0.0203
Pt    0.0756    0.0943    0.0573
Pt    0.0742    0.1323    0.0193
Pt    0.1120    0.0207    0.0200
Pt    0.1125    0.0193    0.0581
Pt    0.1122    0.0199    0.0938
Pt    0.1149    0.0557    0.0214
Pt    0.1133    0.0556    0.0567
Pt    0.1120    0.0922    0.0199
Pt    0.1114    0.1311    0.0202
Pt    0.1114    0.1673    0.0188
Pt    0.1108    0.2440    0.0170
Pt    0.1093    0.2404    0.0926
Pt    0.1469    0.0200    0.0953
Pt    0.1483    0.0943    0.0187
Pt    0.1485    0.1290    0.0201
Pt    0.1464    0.1669    0.0196
Pt    0.1470    0.2038    0.0190
Pt    0.1477    0.2045    0.0576
Pt    0.1463    0.2408    0.0193
Pt    0.1474    0.2419    0.0563
Pt    0.1482    0.2423    0.0932
Pt    0.1863    0.1295    0.0201
Pt    0.1842    0.1660    0.0199
Pt    0.1857    0.1652    0.0572
Pt    0.1847    0.2031    0.0192
Pt    0.1838    0.2034    0.0580
Pt    0.1842    0.2034    0.0925
Pt    0.1853    0.2396    0.0208
Pt    0.1845    0.2404    0.0558
Pt    0.1848    0.2400    0.0934
Pt    0.2214    0.1287    0.0191
Pt    0.2234    0.1289    0.0558
Pt    0.2245    0.1290    0.0940
Pt    0.2225    0.1666    0.0203
Pt    0.2239    0.1666    0.0564
Pt    0.2217    0.1657    0.0943
Pt    0.2232    0.2032    0.0198
Pt    0.2235    0.2021    0.0566
Pt    0.2235    0.2038    0.0934
Pt    0.2229    0.2392    0.0197
Pt    0.2213    0.2401    0.0563
Pt    0.2204    0.2397    0.0940
Pt    0.2416    0.1652    0.0384
Pt    0.1284    0.2422    0.0747
Pt    0.1295    0.2411    0.0358
Pt    0.0207    0.0374    0.0198
Pt    0.0195    0.0386    0.0555
Pt    0.0188    0.0392    0.0926
Pt    0.0192    0.0756    0.0182
Pt    0.0200    0.0755    0.0567
Pt    0.0201    0.0760    0.0948
Pt    0.0199    0.1120    0.0200
Pt    0.0191    0.1143    0.0556
Pt    0.0200    0.1137    0.0938
Pt    0.0194    0.1494    0.0936
Pt    0.0951    0.0960    0.0400
Pt    0.2039    0.1308    0.0384
Pt    0.0189    0.0213    0.1138
Pt    0.0561    0.0395    0.0182
Pt    0.0567    0.0376    0.0564
Pt    0.0567    0.0385    0.0942
Pt    0.0573    0.0763    0.0197
Pt    0.0570    0.0759    0.0560
Pt    0.0558    0.0766    0.0931
Pt    0.0556    0.1138    0.0180
Pt    0.0578    0.1134    0.0570
Pt    0.2027    0.2406    0.0745
Pt    0.0936    0.0220    0.1108
Pt    0.0566    0.0569    0.0371
Pt    0.0943    0.0385    0.0209
Pt    0.0943    0.0386    0.0563
Pt    0.0926    0.0395    0.0937
Pt    0.0939    0.0735    0.0207
Pt    0.0947    0.0759    0.0580
Pt    0.0948    0.1129    0.0203
Pt    0.0931    0.1494    0.0165
Pt    0.1281    0.2052    0.0374
Pt    0.1309    0.0195    0.0738
Pt    0.2039    0.2024    0.0382
Pt    0.1312    0.0383    0.0174
Pt    0.1307    0.0763    0.0213
Pt    0.1307    0.1119    0.0216
Pt    0.1307    0.1476    0.0202
Pt    0.1279    0.1860    0.0197
Pt    0.1272    0.2215    0.0187
Pt    0.1295    0.2246    0.0560
Pt    0.1288    0.2228    0.0931
Pt    0.1666    0.1115    0.0204
Pt    0.1655    0.1483    0.0221
Pt    0.1661    0.1852    0.0200
Pt    0.1654    0.1831    0.0569
Pt    0.1662    0.2216    0.0197
Pt    0.1669    0.2208    0.0572
Pt    0.1649    0.2204    0.0926
Pt    0.2033    0.1484    0.0205
Pt    0.2053    0.1484    0.0563
Pt    0.2041    0.1854    0.0194
Pt    0.2052    0.1840    0.0573
Pt    0.2041    0.1846    0.0947
Pt    0.2023    0.2208    0.0200
Pt    0.2023    0.2206    0.0568
Pt    0.2028    0.2217    0.0936
Pt    0.2418    0.1104    0.0202
Pt    0.2431    0.1107    0.0930
Pt    0.2414    0.1465    0.0189
Pt    0.2425    0.1461    0.0565
Pt    0.2414    0.1480    0.0931
Pt    0.2418    0.1847    0.0198
Pt    0.2417    0.1840    0.0560
Pt    0.2418    0.1848    0.0946
Pt    0.2420    0.2219    0.0205
Pt    0.2416    0.2221    0.0562
Pt    0.2410    0.2232    0.0933
Pt    0.2019    0.2391    0.1122
Pt    0.0191    0.0186    0.0370
Pt    0.0202    0.0203    0.0752
Pt    0.0023    0.0394    0.0377
Pt    0.0012    0.0202    0.0947
Pt    0.0024    0.0762    0.0758
Pt    0.2238    0.0014    0.1128
Pt    0.0747    0.0038    0.1129
Pt    0.0386    0.0018    0.0762
Pt    0.0194    0.0014    0.0948
Pt    0.1314    0.0011    0.0570
Pt    0.1308    0.0019    0.0208
Pt    0.1677    0.1299    0.0025
Pt    0.1468    0.1860    0.0012
Pt    0.0024    0.1334    0.0560
Pt    0.1670    0.1667    0.0025
Pt    0.1303    0.1289    0.0014
Pt    0.0941    0.1301    0.0012
Pt    0.1132    0.1113    0.0025
Pt    0.0012    0.1130    0.0743
Pt    0.2036    0.1286    0.0015
Pt    0.1486    0.1492    0.0019
Pt    0.1113    0.0019    0.1128
Pt    0.0018    0.1137    0.0014
Pt    0.2223    0.2213    0.0013
Pt    0.0935    0.0575    0.0020
Pt    0.0943    0.0196    0.0022
Pt    0.1462    0.2229    0.0013
Pt    0.1660    0.2419    0.0021
Pt    0.2433    0.1313    0.2228
Pt    0.2414    0.1309    0.1486
Pt    0.1293    0.0206    0.2231
Pt    0.1665    0.0944    0.2222
Pt    0.2415    0.0205    0.2230
Pt    0.1662    0.0581    0.2223
Pt    0.1664    0.0576    0.1847
Pt    0.1310    0.0197    0.1863
Pt    0.2417    0.0204    0.1858
Pt    0.2233    0.0219    0.1298
Pt    0.2433    0.0024    0.1683
Pt    0.0393    0.1452    0.1844
Pt    0.0381    0.1482    0.2208
Pt    0.0394    0.1844    0.1466
Pt    0.0379    0.1858    0.1848
Pt    0.0377    0.1840    0.2215
Pt    0.0367    0.2224    0.1482
Pt    0.0393    0.2219    0.1840
Pt    0.0377    0.2227    0.2221
Pt    0.0765    0.1477    0.2204
Pt    0.0760    0.1845    0.1845
Pt    0.0752    0.1857    0.2227
Pt    0.0742    0.2236    0.1476
Pt    0.0760    0.2225    0.1847
Pt    0.0761    0.2240    0.2215
Pt    0.2420    0.0937    0.1498
Pt    0.2420    0.0566    0.2224
Pt    0.1125    0.1111    0.2199
Pt    0.1124    0.1500    0.2201
Pt    0.1123    0.1853    0.2216
Pt    0.1103    0.2230    0.1470
Pt    0.1126    0.2224    0.1855
Pt    0.1150    0.2239    0.2206
Pt    0.0013    0.2418    0.2428
Pt    0.1308    0.2425    0.2206
Pt    0.1670    0.0199    0.2233
Pt    0.1479    0.0400    0.1858
Pt    0.1483    0.0385    0.2220
Pt    0.1490    0.0759    0.2229
Pt    0.1502    0.1123    0.2194
Pt    0.1504    0.1497    0.2253
Pt    0.1486    0.2272    0.1484
Pt    0.1298    0.2422    0.1473
Pt    0.1310    0.1687    0.2245
Pt    0.0014    0.1301    0.1675
Pt    0.1863    0.0411    0.1471
Pt    0.1860    0.0398    0.1855
Pt    0.1855    0.0383    0.2232
Pt    0.1866    0.0758    0.1859
Pt    0.1854    0.0771    0.2237
Pt    0.1866    0.1137    0.2239
Pt    0.2035    0.0566    0.2245
Pt    0.0957    0.2044    0.1849
Pt    0.0190    0.2412    0.1854
Pt    0.2234    0.0411    0.1477
Pt    0.2227    0.0381    0.1860
Pt    0.2218    0.0389    0.2230
Pt    0.2228    0.0762    0.1487
Pt    0.2230    0.0773    0.1860
Pt    0.2226    0.0763    0.2231
Pt    0.2220    0.1127    0.1486
Pt    0.2237    0.1142    0.1873
Pt    0.2224    0.1167    0.2220
Pt    0.2233    0.1484    0.1484
Pt    0.0558    0.2424    0.1467
Pt    0.0561    0.2035    0.2226
Pt    0.2426    0.0208    0.1477
Pt    0.1292    0.0208    0.1493
Pt    0.2041    0.0947    0.2236
Pt    0.0952    0.2417    0.2219
Pt    0.2420    0.0940    0.2224
Pt    0.2048    0.0953    0.1862
Pt    0.0949    0.2418    0.1855
Pt    0.1321    0.1313    0.2224
Pt    0.1670    0.0207    0.1857
Pt    0.0198    0.2421    0.1471
Pt    0.2046    0.0212    0.1857
Pt    0.0933    0.2428    0.1476
Pt    0.0571    0.2032    0.1845
Pt    0.2432    0.0951    0.1868
Pt    0.1683    0.0216    0.1469
Pt    0.0574    0.2036    0.1462
Pt    0.0571    0.1667    0.2222
Pt    0.0366    0.0206    0.1321
Pt    0.0376    0.1277    0.2031
Pt    0.0387    0.1289    0.2397
Pt    0.0381    0.1665    0.1659
Pt    0.0378    0.1663    0.2030
Pt    0.0369    0.1660    0.2399
Pt    0.0373    0.2031    0.1300
Pt    0.0388    0.2028    0.1651
Pt    0.0374    0.2037    0.2035
Pt    0.0383    0.2049    0.2407
Pt    0.0377    0.2412    0.1271
Pt    0.0376    0.2418    0.1668
Pt    0.0386    0.2400    0.2031
Pt    0.0377    0.2420    0.2407
Pt    0.0746    0.0217    0.1308
Pt    0.0751    0.1306    0.2396
Pt    0.0750    0.1674    0.2038
Pt    0.0753    0.1663    0.2406
Pt    0.0756    0.2030    0.1656
Pt    0.0767    0.2040    0.2028
Pt    0.0744    0.2037    0.2416
Pt    0.0731    0.2407    0.1281
Pt    0.0743    0.2404    0.1673
Pt    0.0749    0.2414    0.2031
Pt    0.0764    0.2431    0.2416
Pt    0.1097    0.0206    0.1312
Pt    0.1128    0.0200    0.1690
Pt    0.1128    0.0193    0.2431
Pt    0.1108    0.0953    0.2389
Pt    0.1124    0.1308    0.2391
Pt    0.1123    0.1670    0.2409
Pt    0.1140    0.2032    0.2046
Pt    0.1139    0.2044    0.2403
Pt    0.1114    0.2409    0.1286
Pt    0.1117    0.2416    0.1662
Pt    0.1142    0.2415    0.2023
Pt    0.1135    0.2412    0.2392
Pt    0.1478    0.0213    0.1307
Pt    0.1494    0.0206    0.1674
Pt    0.1480    0.0201    0.2052
Pt    0.1476    0.0199    0.2412
Pt    0.1474    0.0580    0.2043
Pt    0.1476    0.0589    0.2415
Pt    0.1481    0.0937    0.2414
Pt    0.1492    0.1303    0.2405
Pt    0.1474    0.2419    0.1284
Pt    0.1856    0.0214    0.1286
Pt    0.1857    0.0213    0.1680
Pt    0.1854    0.0203    0.2046
Pt    0.1844    0.0203    0.2426
Pt    0.1848    0.0582    0.1671
Pt    0.1858    0.0580    0.2046
Pt    0.1847    0.0573    0.2417
Pt    0.1855    0.0961    0.2048
Pt    0.1871    0.0956    0.2420
Pt    0.2048    0.0026    0.1660
Pt    0.2239    0.0208    0.1658
Pt    0.2224    0.0201    0.2046
Pt    0.2217    0.0204    0.2409
Pt    0.2233    0.0585    0.1295
Pt    0.2238    0.0573    0.1674
Pt    0.2223    0.0581    0.2045
Pt    0.2229    0.0575    0.2416
Pt    0.2255    0.0941    0.1306
Pt    0.2214    0.0953    0.1677
Pt    0.2223    0.0962    0.2053
Pt    0.2238    0.0956    0.2412
Pt    0.2239    0.1299    0.1300
Pt    0.2242    0.1304    0.1667
Pt    0.2250    0.1305    0.2426
Pt    0.2238    0.1657    0.1294
Pt    0.2235    0.2400    0.1300
Pt    0.0550    0.1679    0.1854
Pt    0.0184    0.0399    0.1316
Pt    0.0189    0.0739    0.1325
Pt    0.0206    0.1121    0.1294
Pt    0.0179    0.1127    0.1668
Pt    0.0191    0.1118    0.2405
Pt    0.0205    0.1487    0.1299
Pt    0.0194    0.1485    0.1676
Pt    0.0194    0.1485    0.2022
Pt    0.0194    0.1471    0.2407
Pt    0.0192    0.1869    0.1274
Pt    0.0181    0.1860    0.1662
Pt    0.0182    0.1851    0.2027
Pt    0.0186    0.1851    0.2421
Pt    0.0196    0.2222    0.1294
Pt    0.0200    0.2232    0.1666
Pt    0.0182    0.2231    0.2033
Pt    0.0195    0.2220    0.2413
Pt    0.0938    0.1673    0.2226
Pt    0.0563    0.1487    0.2031
Pt    0.0566    0.1472    0.2393
Pt    0.0575    0.1840    0.1660
Pt    0.0572    0.1859    0.2040
Pt    0.0555    0.1852    0.2416
Pt    0.0551    0.2228    0.1292
Pt    0.0569    0.2218    0.1661
Pt    0.0559    0.2221    0.2049
Pt    0.0580    0.2228    0.2410
Pt    0.2046    0.0577    0.1858
Pt    0.0932    0.1108    0.2391
Pt    0.0935    0.1489    0.2396
Pt    0.0945    0.1857    0.2035
Pt    0.0938    0.1857    0.2402
Pt    0.0916    0.2243    0.1300
Pt    0.0936    0.2218    0.1653
Pt    0.0952    0.2233    0.2040
Pt    0.0951    0.2232    0.2402
Pt    0.0566    0.1301    0.2211
Pt    0.2047    0.0582    0.1481
Pt    0.0199    0.2416    0.2210
Pt    0.2429    0.0573    0.1860
Pt    0.1306    0.0385    0.2034
Pt    0.1289    0.0399    0.2414
Pt    0.1285    0.0754    0.2412
Pt    0.1300    0.1131    0.2389
Pt    0.1297    0.1495    0.2398
Pt    0.1298    0.2218    0.1293
Pt    0.1287    0.2238    0.1644
Pt    0.1319    0.2224    0.2405
Pt    0.2026    0.0192    0.2242
Pt    0.0955    0.2046    0.2226
Pt    0.2039    0.0219    0.1472
Pt    0.1298    0.0937    0.2220
Pt    0.1675    0.0383    0.1657
Pt    0.1673    0.0391    0.2039
Pt    0.1661    0.0395    0.2407
Pt    0.1670    0.0763    0.2036
Pt    0.1678    0.0776    0.2423
Pt    0.1663    0.1122    0.2410
Pt    0.1643    0.2230    0.1302
Pt    0.0567    0.2417    0.2233
Pt    0.1684    0.1316    0.2248
Pt    0.0567    0.2413    0.1855
Pt    0.0924    0.0195    0.1498
Pt    0.2052    0.0396    0.1294
Pt    0.2046    0.0401    0.1672
Pt    0.2037    0.0384    0.2047
Pt    0.2037    0.0372    0.2428
Pt    0.2033    0.0758    0.1668
Pt    0.2042    0.0757    0.2048
Pt    0.2051    0.0753    0.2407
Pt    0.2044    0.1130    0.2046
Pt    0.2051    0.1141    0.2428
Pt    0.2434    0.0582    0.1475
Pt    0.1299    0.0569    0.2232
Pt    0.0960    0.1302    0.2212
Pt    0.0188    0.0011    0.1315
Pt    0.2425    0.0392    0.1288
Pt    0.2429    0.0386    0.1667
Pt    0.2417    0.0384    0.2033
Pt    0.2420    0.0389    0.2415
Pt    0.2425    0.0761    0.1295
Pt    0.2433    0.0765    0.1679
Pt    0.2420    0.0754    0.2037
Pt    0.2412    0.0755    0.2424
Pt    0.2436    0.1124    0.1312
Pt    0.2412    0.1124    0.1669
Pt    0.2421    0.1145    0.2047
Pt    0.2436    0.1136    0.2410
Pt    0.2426    0.1484    0.1313
Pt    0.2416    0.2208    0.1305
Pt    0.0158    0.0941    0.1479
Pt    0.0202    0.1310    0.1481
Pt    0.0197    0.1286    0.1860
Pt    0.0203    0.1289    0.2217
Pt    0.0205    0.1687    0.1459
Pt    0.0196    0.1685    0.1848
Pt    0.0190    0.1664    0.2216
Pt    0.0189    0.2031    0.1482
Pt    0.0192    0.2045    0.1847
Pt    0.0192    0.2034    0.2228
Pt    0.2051    0.0023    0.1294
Pt    0.2412    0.0014    0.2412
Pt    0.2423    0.0014    0.2038
Pt    0.1279    0.0028    0.2031
Pt    0.0015    0.0943    0.1298
Pt    0.0012    0.1121    0.2198
Pt    0.1291    0.0013    0.1675
Pt    0.1112    0.0024    0.1506
Pt    0.0543    0.0027    0.1321
Pt    0.1674    0.0026    0.1667
Pt    0.0936    0.0014    0.1313
Pt    0.2236    0.0019    0.1480
Pt    0.1661    0.0036    0.1296
Pt    0.1492    0.0028    0.1497
Pt    0.1862    0.0039    0.1483
Pt    0.1489    0.0017    0.1857
Pt    0.1298    0.0016    0.1310
Pt    0.2222    0.0023    0.1853
Pt    0.0013    0.1506    0.1472
Pt    0.0014    0.1690    0.1291
Pt    0.0015    0.1858    0.2227
Pt    0.2034    0.0016    0.2042
Pt    0.2035    0.0018    0.2436
Pt    0.1865    0.0022    0.1844
Pt    0.2221    0.0024    0.2214
Pt    0.0027    0.2044    0.2791
Pt    0.0200    0.0028    0.3508
Pt    0.0028    0.0224    0.3502
Pt    0.0202    0.2433    0.3724
Pt    0.2424    0.2402    0.3715
Pt    0.1663    0.0201    0.3357
Pt    0.2398    0.2389    0.3348
Pt    0.1645    0.0571    0.3711
Pt    0.2417    0.1323    0.2990
Pt    0.1669    0.0580    0.3359
Pt    0.2430    0.1308    0.2605
Pt    0.2420    0.0946    0.3714
Pt    0.2048    0.0578    0.3361
Pt    0.2414    0.0946    0.3345
Pt    0.1665    0.0581    0.2987
Pt    0.0381    0.1116    0.2579
Pt    0.0386    0.1478    0.2587
Pt    0.0381    0.1477    0.2978
Pt    0.0399    0.1458    0.3347
Pt    0.0375    0.1852    0.2600
Pt    0.0388    0.1844    0.2968
Pt    0.0393    0.1862    0.3343
Pt    0.0402    0.1860    0.3698
Pt    0.0386    0.2243    0.2591
Pt    0.0388    0.2243    0.2974
Pt    0.0386    0.2239    0.3345
Pt    0.0392    0.2254    0.3726
Pt    0.0745    0.1126    0.2581
Pt    0.0761    0.1480    0.2602
Pt    0.0749    0.1480    0.2968
Pt    0.0763    0.1861    0.2588
Pt    0.0767    0.1851    0.2969
Pt    0.0771    0.1859    0.3326
Pt    0.0790    0.1839    0.3694
Pt    0.0761    0.2221    0.2589
Pt    0.0784    0.2218    0.2974
Pt    0.0773    0.2230    0.3331
Pt    0.0777    0.2229    0.3690
Pt    0.1666    0.0195    0.2986
Pt    0.1138    0.0358    0.2625
Pt    0.1123    0.0751    0.2600
Pt    0.1119    0.1130    0.2589
Pt    0.1117    0.1120    0.2975
Pt    0.1117    0.1475    0.2603
Pt    0.1146    0.1508    0.2972
Pt    0.1131    0.1862    0.2583
Pt    0.1139    0.1855    0.2965
Pt    0.1129    0.2236    0.2586
Pt    0.1126    0.2237    0.2951
Pt    0.1156    0.2221    0.3326
Pt    0.2410    0.0570    0.2616
Pt    0.1670    0.0198    0.2598
Pt    0.2429    0.0206    0.3732
Pt    0.1486    0.0375    0.2596
Pt    0.1486    0.0398    0.2989
Pt    0.1496    0.0394    0.3356
Pt    0.1468    0.0765    0.2603
Pt    0.1480    0.0761    0.2976
Pt    0.1493    0.1133    0.2594
Pt    0.1489    0.1129    0.2974
Pt    0.1493    0.1495    0.2583
Pt    0.1485    0.1519    0.2956
Pt    0.1357    0.2416    0.2962
Pt    0.2422    0.0209    0.3365
Pt    0.1660    0.0943    0.2990
Pt    0.2428    0.0200    0.2985
Pt    0.1851    0.0390    0.2611
Pt    0.1847    0.0388    0.2987
Pt    0.1856    0.0378    0.3369
Pt    0.1851    0.0383    0.3726
Pt    0.1865    0.0769    0.2601
Pt    0.1850    0.0762    0.2978
Pt    0.1865    0.0760    0.3357
Pt    0.1849    0.0768    0.3735
Pt    0.1859    0.1134    0.2605
Pt    0.1841    0.1130    0.2986
Pt    0.2415    0.0200    0.2597
Pt    0.1667    0.0943    0.2600
Pt    0.2039    0.1294    0.2980
Pt    0.1329    0.2044    0.2591
Pt    0.2221    0.0390    0.2608
Pt    0.2229    0.0386    0.2987
Pt    0.2241    0.0391    0.3360
Pt    0.2238    0.0398    0.3726
Pt    0.2234    0.0755    0.2608
Pt    0.2235    0.0757    0.2990
Pt    0.2226    0.0770    0.3359
Pt    0.2230    0.0753    0.3715
Pt    0.2238    0.1123    0.2608
Pt    0.2224    0.1125    0.2985
Pt    0.2222    0.1140    0.3348
Pt    0.1658    0.0575    0.2597
Pt    0.2423    0.0937    0.2983
Pt    0.0042    0.0031    0.3697
Pt    0.1688    0.1319    0.2580
Pt    0.2425    0.0947    0.2601
Pt    0.1675    0.0188    0.3724
Pt    0.2427    0.0580    0.3748
Pt    0.2032    0.0566    0.2984
Pt    0.2426    0.0562    0.3349
Pt    0.2039    0.0578    0.2598
Pt    0.2426    0.0565    0.2988
Pt    0.2044    0.0197    0.3731
Pt    0.0375    0.1297    0.2775
Pt    0.0375    0.1292    0.3162
Pt    0.0391    0.1663    0.2790
Pt    0.0388    0.1666    0.3155
Pt    0.0402    0.1660    0.3518
Pt    0.0388    0.2051    0.2793
Pt    0.0393    0.2046    0.3166
Pt    0.0408    0.2057    0.3523
Pt    0.0385    0.2417    0.2780
Pt    0.0390    0.2424    0.3161
Pt    0.0391    0.2445    0.3540
Pt    0.0748    0.1295    0.2794
Pt    0.0756    0.1668    0.2790
Pt    0.0760    0.1668    0.3156
Pt    0.0783    0.1655    0.3503
Pt    0.0755    0.2045    0.2778
Pt    0.0773    0.2041    0.3153
Pt    0.0770    0.2047    0.3505
Pt    0.0762    0.2418    0.2779
Pt    0.0785    0.2415    0.3151
Pt    0.0784    0.2422    0.3505
Pt    0.1108    0.0205    0.2817
Pt    0.1112    0.0931    0.2784
Pt    0.1113    0.1297    0.2792
Pt    0.1123    0.1314    0.3130
Pt    0.1145    0.1682    0.2770
Pt    0.1137    0.2041    0.2773
Pt    0.1143    0.2034    0.3141
Pt    0.1140    0.2434    0.2766
Pt    0.1156    0.2414    0.3134
Pt    0.1148    0.2429    0.3506
Pt    0.1483    0.0201    0.2795
Pt    0.1489    0.0199    0.3163
Pt    0.1471    0.0192    0.3530
Pt    0.1479    0.0586    0.2792
Pt    0.1473    0.0576    0.3170
Pt    0.1483    0.0930    0.2802
Pt    0.1480    0.0949    0.3149
Pt    0.1500    0.1309    0.2786
Pt    0.1505    0.1681    0.2760
Pt    0.1847    0.0200    0.2806
Pt    0.1855    0.0193    0.3179
Pt    0.1854    0.0191    0.3557
Pt    0.1857    0.0573    0.2787
Pt    0.1865    0.0570    0.3181
Pt    0.1851    0.0566    0.3536
Pt    0.1858    0.0949    0.2799
Pt    0.1841    0.0948    0.3175
Pt    0.1866    0.0930    0.3532
Pt    0.1862    0.1311    0.2790
Pt    0.2220    0.0201    0.2797
Pt    0.2236    0.0198    0.3178
Pt    0.2236    0.0202    0.3548
Pt    0.2232    0.0563    0.2801
Pt    0.2229    0.0574    0.3183
Pt    0.2244    0.0577    0.3533
Pt    0.2237    0.0949    0.2802
Pt    0.2225    0.0946    0.3161
Pt    0.2231    0.0952    0.3536
Pt    0.2225    0.1319    0.2792
Pt    0.2229    0.1306    0.3172
Pt    0.2029    0.0948    0.3726
Pt    0.1341    0.2423    0.2568
Pt    0.0183    0.1113    0.2776
Pt    0.0194    0.1469    0.2784
Pt    0.0202    0.1467    0.3159
Pt    0.0215    0.1484    0.3538
Pt    0.0195    0.1853    0.2783
Pt    0.0207    0.1855    0.3153
Pt    0.0207    0.1861    0.3536
Pt    0.0205    0.2236    0.2783
Pt    0.0221    0.2234    0.3155
Pt    0.0218    0.2251    0.3540
Pt    0.0568    0.1474    0.2784
Pt    0.0572    0.1466    0.3156
Pt    0.0569    0.1853    0.2776
Pt    0.0580    0.1856    0.3155
Pt    0.0595    0.1846    0.3513
Pt    0.0577    0.2233    0.2785
Pt    0.0584    0.2234    0.3150
Pt    0.0575    0.2248    0.3534
Pt    0.0939    0.1121    0.2780
Pt    0.0955    0.1494    0.2795
Pt    0.0947    0.1492    0.3139
Pt    0.0942    0.1847    0.2774
Pt    0.0957    0.1854    0.3157
Pt    0.0948    0.1846    0.3498
Pt    0.0949    0.2236    0.2767
Pt    0.0965    0.2220    0.3155
Pt    0.0980    0.2213    0.3531
Pt    0.2047    0.1310    0.2609
Pt    0.0017    0.1294    0.3157
Pt    0.1301    0.0381    0.2805
Pt    0.1303    0.0388    0.3169
Pt    0.1284    0.0757    0.2796
Pt    0.1304    0.1126    0.2788
Pt    0.1305    0.1141    0.3142
Pt    0.1305    0.1489    0.2776
Pt    0.1331    0.1858    0.2766
Pt    0.1316    0.2241    0.2771
Pt    0.1317    0.2223    0.3112
Pt    0.0961    0.2015    0.3682
Pt    0.1473    0.0013    0.2983
Pt    0.2046    0.0940    0.3353
Pt    0.2043    0.0194    0.3368
Pt    0.1665    0.0393    0.2797
Pt    0.1671    0.0393    0.3175
Pt    0.1661    0.0382    0.3548
Pt    0.1675    0.0756    0.2776
Pt    0.1663    0.0763    0.3191
Pt    0.1680    0.0758    0.3536
Pt    0.1674    0.1122    0.2787
Pt    0.1672    0.1483    0.2774
Pt    0.2036    0.0946    0.2981
Pt    0.2043    0.0198    0.2987
Pt    0.2052    0.0939    0.2612
Pt    0.2045    0.0395    0.2799
Pt    0.2039    0.0385    0.3177
Pt    0.2042    0.0386    0.3551
Pt    0.2056    0.0762    0.2794
Pt    0.2033    0.0763    0.3159
Pt    0.2049    0.0749    0.3543
Pt    0.2040    0.1123    0.2783
Pt    0.2038    0.1127    0.3173
Pt    0.2029    0.0199    0.2619
Pt    0.2034    0.0581    0.3722
Pt    0.1323    0.2036    0.2947
Pt    0.2415    0.0381    0.2783
Pt    0.2432    0.0384    0.3171
Pt    0.2423    0.0397    0.3547
Pt    0.2415    0.0762    0.2794
Pt    0.2415    0.0759    0.3186
Pt    0.2424    0.0767    0.3541
Pt    0.2411    0.1130    0.2798
Pt    0.2424    0.1135    0.3175
Pt    0.2417    0.1122    0.3520
Pt    0.0195    0.1303    0.2596
Pt    0.0204    0.1288    0.2971
Pt    0.0188    0.1299    0.3353
Pt    0.0196    0.1669    0.2604
Pt    0.0200    0.1667    0.2978
Pt    0.0217    0.1657    0.3345
Pt    0.0213    0.1676    0.3711
Pt    0.0201    0.2043    0.2612
Pt    0.0221    0.2042    0.2968
Pt    0.0202    0.2037    0.3355
Pt    0.0222    0.2054    0.3712
Pt    0.0191    0.2414    0.2602
Pt    0.0203    0.2413    0.2975
Pt    0.0212    0.2429    0.3352
Pt    0.1286    0.0016    0.2803
Pt    0.0562    0.1294    0.2599
Pt    0.0560    0.1292    0.2973
Pt    0.0571    0.1670    0.2597
Pt    0.0568    0.1655    0.2975
Pt    0.0583    0.1658    0.3336
Pt    0.0586    0.1656    0.3704
Pt    0.0557    0.2042    0.2602
Pt    0.0588    0.2036    0.2976
Pt    0.0571    0.2053    0.3343
Pt    0.0598    0.2024    0.3698
Pt    0.0577    0.2413    0.2586
Pt    0.0585    0.2409    0.2958
Pt    0.0583    0.2420    0.3346
Pt    0.0593    0.2441    0.3710
Pt    0.0932    0.0942    0.2593
Pt    0.0936    0.1292    0.2589
Pt    0.0927    0.1299    0.2975
Pt    0.0943    0.1663    0.2591
Pt    0.0949    0.1684    0.2965
Pt    0.0944    0.2051    0.2604
Pt    0.0954    0.2027    0.2966
Pt    0.0975    0.2049    0.3338
Pt    0.0948    0.2424    0.2586
Pt    0.0957    0.2420    0.2967
Pt    0.0973    0.2414    0.3329
Pt    0.0954    0.2411    0.3695
Pt    0.1291    0.0176    0.2620
Pt    0.1299    0.0204    0.2987
Pt    0.1299    0.0200    0.3346
Pt    0.1290    0.0566    0.2617
Pt    0.1291    0.0584    0.2975
Pt    0.1304    0.0956    0.2600
Pt    0.1285    0.0930    0.2988
Pt    0.1310    0.1301    0.2589
Pt    0.1316    0.1321    0.2971
Pt    0.1327    0.1682    0.2579
Pt    0.0052    0.0034    0.3305
Pt    0.0013    0.1658    0.2790
Pt    0.0020    0.2429    0.3173
Pt    0.0019    0.1650    0.3173
Pt    0.0015    0.1856    0.2976
Pt    0.0016    0.1477    0.2976
Pt    0.2040    0.0011    0.2800
Pt    0.0033    0.2229    0.3350
Pt    0.0024    0.1840    0.3357
Pt    0.0026    0.2238    0.3721
Pt    0.2408    0.0018    0.2806
Pt    0.0027    0.1860    0.3724
Pt    0.0016    0.2418    0.2793
Pt    0.0018    0.2431    0.3528
Pt    0.0015    0.2043    0.3163
Pt    0.0020    0.1663    0.3535
Pt    0.0026    0.2051    0.3538
Pt    0.1106    0.0024    0.3012
Pt    0.0025    0.2229    0.2977
Pt    0.2045    0.0017    0.3186
Pt    0.2428    0.0020    0.3556
Pt    0.0026    0.1478    0.3356
Pt    0.1849    0.0017    0.2625
Pt    0.2234    0.0028    0.2604
Pt    0.0012    0.1852    0.2607
Pt    0.1490    0.0012    0.3363
Pt    0.1656    0.0014    0.3567
Pt    0.2227    0.0024    0.3370
Pt    0.1303    0.0017    0.3168
Pt    0.1477    0.0013    0.2607
Pt    0.1661    0.0013    0.3176
Pt    0.0011    0.1490    0.2598
Pt    0.1691    0.2231    0.5004
Pt    0.0936    0.2228    0.4999
Pt    0.2428    0.2408    0.4833
Pt    0.2417    0.2409    0.4463
Pt    0.2411    0.1278    0.4817
Pt    0.0365    0.0402    0.4811
Pt    0.0372    0.0763    0.4813
Pt    0.0367    0.1117    0.4787
Pt    0.0356    0.1495    0.4419
Pt    0.0372    0.1508    0.4803
Pt    0.0399    0.1856    0.4063
Pt    0.0381    0.1872    0.4441
Pt    0.0356    0.1876    0.4814
Pt    0.0425    0.2244    0.4063
Pt    0.0401    0.2250    0.4435
Pt    0.0367    0.2245    0.4798
Pt    0.0740    0.0365    0.4806
Pt    0.0749    0.0740    0.4831
Pt    0.0751    0.1132    0.4811
Pt    0.0757    0.1494    0.4427
Pt    0.0749    0.1486    0.4813
Pt    0.0762    0.1866    0.4060
Pt    0.0759    0.1861    0.4438
Pt    0.0750    0.1860    0.4817
Pt    0.0782    0.2235    0.4055
Pt    0.0770    0.2237    0.4437
Pt    0.0744    0.2240    0.4828
Pt    0.1112    0.0367    0.4806
Pt    0.1121    0.0733    0.4817
Pt    0.1104    0.1108    0.4433
Pt    0.1114    0.1105    0.4819
Pt    0.1117    0.1495    0.4430
Pt    0.1113    0.1485    0.4803
Pt    0.1138    0.1875    0.4440
Pt    0.1123    0.1858    0.4821
Pt    0.1123    0.2231    0.4457
Pt    0.1122    0.2260    0.4793
Pt    0.2452    0.0939    0.4788
Pt    0.1465    0.0368    0.4447
Pt    0.1490    0.0370    0.4808
Pt    0.1481    0.0741    0.4444
Pt    0.1488    0.0730    0.4815
Pt    0.1476    0.1126    0.4412
Pt    0.1477    0.1115    0.4819
Pt    0.1502    0.1490    0.4430
Pt    0.1482    0.1479    0.4812
Pt    0.1484    0.1852    0.4813
Pt    0.1495    0.2227    0.4823
Pt    0.1832    0.0371    0.4076
Pt    0.1870    0.0366    0.4462
Pt    0.1874    0.0351    0.4815
Pt    0.1850    0.0745    0.4086
Pt    0.1856    0.0754    0.4439
Pt    0.1872    0.0740    0.4817
Pt    0.1857    0.1118    0.4447
Pt    0.1859    0.1120    0.4806
Pt    0.1851    0.1492    0.4814
Pt    0.1866    0.1855    0.4794
Pt    0.1857    0.2231    0.4807
Pt    0.2225    0.0385    0.4071
Pt    0.2224    0.0346    0.4445
Pt    0.2255    0.0351    0.4813
Pt    0.2251    0.0761    0.4074
Pt    0.2239    0.0744    0.4443
Pt    0.2240    0.0741    0.4814
Pt    0.2235    0.1125    0.4453
Pt    0.2228    0.1108    0.4818
Pt    0.2249    0.1479    0.4802
Pt    0.2228    0.1850    0.4812
Pt    0.2229    0.2226    0.4820
Pt    0.0745    0.1312    0.5000
Pt    0.2415    0.2029    0.4819
Pt    0.0359    0.0205    0.4638
Pt    0.0371    0.0576    0.4633
Pt    0.0384    0.1323    0.4630
Pt    0.0401    0.1675    0.3875
Pt    0.0372    0.1679    0.4247
Pt    0.0370    0.1681    0.4610
Pt    0.0397    0.2060    0.3878
Pt    0.0415    0.2051    0.4243
Pt    0.0378    0.2061    0.4611
Pt    0.0398    0.2442    0.3910
Pt    0.0418    0.2420    0.4237
Pt    0.0755    0.0572    0.4628
Pt    0.0744    0.0948    0.4601
Pt    0.0747    0.1318    0.4617
Pt    0.0757    0.1658    0.3898
Pt    0.0765    0.1669    0.4253
Pt    0.0752    0.1669    0.4626
Pt    0.0774    0.2038    0.3869
Pt    0.0755    0.2051    0.4243
Pt    0.0756    0.2045    0.4626
Pt    0.0751    0.2417    0.4640
Pt    0.1108    0.0559    0.4624
Pt    0.1129    0.0934    0.4625
Pt    0.1118    0.1293    0.4605
Pt    0.1119    0.1706    0.4261
Pt    0.1121    0.1670    0.4620
Pt    0.1140    0.2050    0.4263
Pt    0.1128    0.2047    0.4646
Pt    0.1490    0.0185    0.4627
Pt    0.1483    0.0575    0.4269
Pt    0.1491    0.0550    0.4629
Pt    0.1479    0.0936    0.4258
Pt    0.1487    0.0935    0.4626
Pt    0.1483    0.1300    0.4601
Pt    0.1486    0.1675    0.4614
Pt    0.1495    0.2050    0.4628
Pt    0.1833    0.0183    0.3913
Pt    0.1847    0.0207    0.4269
Pt    0.1863    0.0176    0.4623
Pt    0.1837    0.0570    0.3903
Pt    0.1851    0.0561    0.4253
Pt    0.1870    0.0546    0.4642
Pt    0.1858    0.0943    0.4260
Pt    0.1876    0.0925    0.4625
Pt    0.1862    0.1316    0.4636
Pt    0.1880    0.1657    0.4618
Pt    0.1879    0.2046    0.4630
Pt    0.2233    0.0180    0.3912
Pt    0.2199    0.0186    0.4244
Pt    0.2237    0.0573    0.3903
Pt    0.2229    0.0564    0.4253
Pt    0.2246    0.0540    0.4636
Pt    0.2228    0.0951    0.3893
Pt    0.2240    0.0925    0.4259
Pt    0.2240    0.0941    0.4640
Pt    0.2239    0.1303    0.4623
Pt    0.2222    0.2057    0.4633
Pt    0.2244    0.2423    0.4647
Pt    0.0743    0.1678    0.4997
Pt    0.0173    0.0387    0.4631
Pt    0.0175    0.1497    0.4620
Pt    0.0211    0.1860    0.3886
Pt    0.0191    0.1890    0.4247
Pt    0.0183    0.1872    0.4603
Pt    0.0204    0.2263    0.3910
Pt    0.0234    0.2252    0.4231
Pt    0.0551    0.0394    0.4635
Pt    0.0575    0.0760    0.4638
Pt    0.0564    0.1132    0.4618
Pt    0.0559    0.1501    0.4243
Pt    0.0556    0.1500    0.4607
Pt    0.0589    0.1853    0.3873
Pt    0.0575    0.1864    0.4253
Pt    0.0565    0.1862    0.4632
Pt    0.0608    0.2248    0.3866
Pt    0.0598    0.2246    0.4247
Pt    0.0582    0.2238    0.4622
Pt    0.0935    0.0747    0.4634
Pt    0.0933    0.1117    0.4615
Pt    0.0956    0.1515    0.4243
Pt    0.0934    0.1485    0.4605
Pt    0.0951    0.1879    0.4257
Pt    0.0938    0.1864    0.4634
Pt    0.0971    0.2193    0.3864
Pt    0.0953    0.2220    0.4257
Pt    0.0929    0.2235    0.4634
Pt    0.1296    0.0359    0.4612
Pt    0.1303    0.0748    0.4625
Pt    0.1301    0.1115    0.4601
Pt    0.1305    0.1478    0.4618
Pt    0.1328    0.1852    0.4599
Pt    0.1313    0.2242    0.4629
Pt    0.1650    0.0399    0.3900
Pt    0.1656    0.0383    0.4266
Pt    0.1682    0.0370    0.4642
Pt    0.1665    0.0762    0.3895
Pt    0.1662    0.0757    0.4265
Pt    0.1678    0.0743    0.4640
Pt    0.1677    0.1128    0.4245
Pt    0.1668    0.1116    0.4627
Pt    0.1674    0.1473    0.4627
Pt    0.1678    0.1871    0.4605
Pt    0.2441    0.0544    0.4810
Pt    0.2033    0.0379    0.3895
Pt    0.2039    0.0388    0.4260
Pt    0.2059    0.0363    0.4640
Pt    0.2051    0.0754    0.3907
Pt    0.2047    0.0749    0.4251
Pt    0.2060    0.0734    0.4628
Pt    0.2043    0.1110    0.4267
Pt    0.2052    0.1128    0.4633
Pt    0.2055    0.1485    0.4624
Pt    0.2038    0.1860    0.4615
Pt    0.2046    0.2246    0.4644
Pt    0.2419    0.0377    0.3914
Pt    0.2389    0.0377    0.4259
Pt    0.2419    0.0739    0.4625
Pt    0.2430    0.2218    0.4639
Pt    0.0187    0.0198    0.4832
Pt    0.0186    0.0583    0.4802
Pt    0.0193    0.0930    0.4826
Pt    0.0183    0.1329    0.4809
Pt    0.0192    0.1694    0.4426
Pt    0.0164    0.1696    0.4798
Pt    0.0232    0.2064    0.4060
Pt    0.0218    0.2085    0.4412
Pt    0.0178    0.2039    0.4799
Pt    0.0563    0.0181    0.4806
Pt    0.0554    0.0572    0.4815
Pt    0.0566    0.0939    0.4810
Pt    0.0563    0.1328    0.4425
Pt    0.0556    0.1297    0.4807
Pt    0.0572    0.1681    0.4069
Pt    0.0564    0.1679    0.4439
Pt    0.0564    0.1681    0.4801
Pt    0.0591    0.2060    0.4042
Pt    0.0575    0.2055    0.4434
Pt    0.0556    0.2059    0.4810
Pt    0.0583    0.2427    0.4436
Pt    0.0550    0.2424    0.4815
Pt    0.0926    0.0202    0.4806
Pt    0.0919    0.0543    0.4832
Pt    0.0951    0.0922    0.4447
Pt    0.0933    0.0929    0.4814
Pt    0.0932    0.1314    0.4407
Pt    0.0932    0.1305    0.4801
Pt    0.0947    0.1705    0.4063
Pt    0.0944    0.1704    0.4445
Pt    0.0935    0.1665    0.4803
Pt    0.0952    0.2038    0.4058
Pt    0.0952    0.2047    0.4450
Pt    0.0944    0.2051    0.4819
Pt    0.0920    0.2438    0.4824
Pt    0.1306    0.0187    0.4814
Pt    0.1302    0.0565    0.4442
Pt    0.1301    0.0542    0.4797
Pt    0.1302    0.0928    0.4444
Pt    0.1308    0.0919    0.4819
Pt    0.1297    0.1318    0.4423
Pt    0.1286    0.1290    0.4792
Pt    0.1313    0.1673    0.4425
Pt    0.1303    0.1667    0.4801
Pt    0.1311    0.2051    0.4440
Pt    0.1308    0.2051    0.4810
Pt    0.1301    0.2421    0.4810
Pt    0.1670    0.0211    0.4446
Pt    0.1687    0.0173    0.4828
Pt    0.1661    0.0570    0.4082
Pt    0.1678    0.0564    0.4452
Pt    0.1683    0.0555    0.4817
Pt    0.1683    0.0933    0.4075
Pt    0.1665    0.0933    0.4455
Pt    0.1675    0.0937    0.4818
Pt    0.1688    0.1302    0.4428
Pt    0.1670    0.1299    0.4821
Pt    0.1691    0.1656    0.4457
Pt    0.1663    0.1673    0.4806
Pt    0.1684    0.2043    0.4805
Pt    0.2023    0.0192    0.4084
Pt    0.2044    0.0180    0.4443
Pt    0.2065    0.0179    0.4806
Pt    0.2034    0.0565    0.4071
Pt    0.2051    0.0553    0.4449
Pt    0.2057    0.0556    0.4811
Pt    0.2044    0.0943    0.4072
Pt    0.2059    0.0932    0.4441
Pt    0.2046    0.0936    0.4824
Pt    0.2039    0.1310    0.4437
Pt    0.2052    0.1312    0.4815
Pt    0.2055    0.1660    0.4814
Pt    0.2057    0.2037    0.4812
Pt    0.2050    0.2421    0.4829
Pt    0.2395    0.0554    0.4434
Pt    0.1314    0.1865    0.5004
Pt    0.0167    0.1508    0.4991
Pt    0.2069    0.0734    0.5006
Pt    0.0541    0.1499    0.4988
Pt    0.0357    0.1679    0.4989
Pt    0.2237    0.1303    0.4994
Pt    0.1292    0.1480    0.4989
Pt    0.0013    0.2434    0.3896
Pt    0.2049    0.2229    0.4997
Pt    0.0373    0.0018    0.4829
Pt    0.1117    0.1312    0.5007
Pt    0.0173    0.1862    0.4996
Pt    0.1500    0.0541    0.4992
Pt    0.1483    0.1300    0.5003
Pt    0.1862    0.2420    0.4997
Pt    0.2238    0.2035    0.4999
Pt    0.0733    0.2443    0.5005
Pt    0.2049    0.1846    0.4995
Pt    0.0562    0.0752    0.5006
Pt    0.1489    0.0187    0.5004
Pt    0.0358    0.2062    0.4991
Pt    0.1680    0.1848    0.5000
Pt    0.2427    0.1845    0.4991
Pt    0.0189    0.0019    0.4631
Pt    0.2235    0.2425    0.5007
Pt    0.1867    0.2036    0.4992
Pt    0.0162    0.0756    0.5007
Pt    0.0178    0.2250    0.4974
Pt    0.1301    0.0379    0.4985
Pt    0.0185    0.0400    0.5008
Pt    0.2051    0.1486    0.4996
Pt    0.1125    0.1674    0.5011
Pt    0.1486    0.1670    0.4994
Pt    0.2263    0.0174    0.5006
Pt    0.0731    0.0186    0.4999
Pt    0.1303    0.2235    0.5000
Pt    0.2248    0.1668    0.5000
Pt    0.2257    0.0549    0.4987
Pt    0.0941    0.1491    0.5002
Pt    0.0173    0.1122    0.5000
Pt    0.0374    0.1304    0.4988
Pt    0.1497    0.2041    0.5007
Pt    0.1297    0.1117    0.5003
Pt    0.1498    0.0921    0.4997
Pt    0.2252    0.0921    0.5004
Pt    0.1674    0.1124    0.5001
Pt    0.2434    0.1479    0.4976
Pt    0.0372    0.0934    0.5000
Pt    0.1869    0.0929    0.5006
Pt    0.1116    0.0178    0.4978
Pt    0.0027    0.0045    0.4440
Pt    0.1131    0.2043    0.5009
Pt    0.2429    0.0743    0.4996
Pt    0.0942    0.0749    0.4995
Pt    0.2436    0.1099    0.4989
Pt    0.1499    0.2411    0.4995
Pt    0.0938    0.1116    0.5002
Pt    0.1114    0.2422    0.4995
Pt    0.0938    0.1862    0.5000
Pt    0.1687    0.0352    0.4998
Pt    0.0740    0.2047    0.4991
Pt    0.2443    0.0363    0.5003
Pt    0.0552    0.1125    0.4995
Pt    0.0539    0.1861    0.4995
Pt    0.0034    0.2042    0.3889
Pt    0.1867    0.1667    0.4990
Pt    0.0373    0.0576    0.5011
Pt    0.2048    0.1118    0.4999
Pt    0.2064    0.0363    0.4983
Pt    0.1881    0.0173    0.5006
Pt    0.1868    0.1304    0.5006
Pt    0.1870    0.0545    0.5002
Pt    0.0371    0.2421    0.5009
Pt    0.2428    0.2221    0.4997
Pt    0.0546    0.0362    0.4992
Pt    0.0733    0.0558    0.5003
Pt    0.1666    0.1497    0.5000
Pt    0.0370    0.0193    0.5007
Pt    0.1689    0.0738    0.5001
Pt    0.0909    0.0362    0.5007
Pt    0.0549    0.2236    0.4994
Pt    0.1299    0.0727    0.5002
Pt    0.1114    0.0550    0.5000
Pt    0.2439    0.2447    0.5931
Pt    0.2429    0.2433    0.5574
Pt    0.2423    0.2411    0.5190
Pt    0.2443    0.2049    0.5939
Pt    0.2426    0.2044    0.5560
Pt    0.2415    0.2034    0.5182
Pt    0.2429    0.1672    0.5942
Pt    0.2432    0.1659    0.5561
Pt    0.2430    0.1678    0.5173
Pt    0.2436    0.1301    0.5926
Pt    0.2438    0.1304    0.5550
Pt    0.2440    0.1303    0.5191
Pt    0.2435    0.0933    0.5937
Pt    0.2429    0.0930    0.5564
Pt    0.2431    0.0927    0.5178
Pt    0.2424    0.0561    0.5931
Pt    0.2418    0.0559    0.5563
Pt    0.2447    0.0549    0.5173
Pt    0.2448    0.0174    0.5928
Pt    0.2454    0.0174    0.5563
Pt    0.1689    0.2056    0.5564
Pt    0.1671    0.2044    0.5187
Pt    0.1689    0.1671    0.5945
Pt    0.0373    0.0375    0.5206
Pt    0.0374    0.0374    0.5569
Pt    0.0383    0.0358    0.5944
Pt    0.0371    0.0757    0.5196
Pt    0.0356    0.0749    0.5573
Pt    0.0364    0.0742    0.5947
Pt    0.0365    0.1141    0.5178
Pt    0.0371    0.1125    0.5566
Pt    0.0373    0.1113    0.5929
Pt    0.0354    0.1490    0.5174
Pt    0.0363    0.1487    0.5565
Pt    0.0369    0.1487    0.5930
Pt    0.0353    0.1868    0.5188
Pt    0.0363    0.1864    0.5559
Pt    0.0362    0.1873    0.5933
Pt    0.0362    0.2243    0.5189
Pt    0.0371    0.2243    0.5555
Pt    0.0385    0.2240    0.5930
Pt    0.1684    0.1667    0.5566
Pt    0.1675    0.1678    0.5195
Pt    0.1681    0.1295    0.5935
Pt    0.0750    0.0366    0.5202
Pt    0.0743    0.0365    0.5553
Pt    0.0745    0.0371    0.5935
Pt    0.0754    0.0744    0.5180
Pt    0.0733    0.0746    0.5568
Pt    0.0742    0.0752    0.5951
Pt    0.0742    0.1134    0.5187
Pt    0.0741    0.1127    0.5550
Pt    0.0751    0.1119    0.5941
Pt    0.0744    0.1494    0.5175
Pt    0.0734    0.1513    0.5558
Pt    0.0751    0.1505    0.5936
Pt    0.0743    0.1865    0.5184
Pt    0.0736    0.1876    0.5553
Pt    0.0744    0.1875    0.5918
Pt    0.0754    0.2236    0.5190
Pt    0.0740    0.2234    0.5556
Pt    0.0742    0.2243    0.5929
Pt    0.1681    0.1306    0.5562
Pt    0.1672    0.1294    0.5188
Pt    0.1681    0.0925    0.5944
Pt    0.1105    0.0363    0.5180
Pt    0.1111    0.0368    0.5561
Pt    0.1119    0.0361    0.5934
Pt    0.1113    0.0736    0.5190
Pt    0.1120    0.0755    0.5564
Pt    0.1121    0.0728    0.5933
Pt    0.1118    0.1113    0.5186
Pt    0.1119    0.1111    0.5565
Pt    0.1117    0.1113    0.5938
Pt    0.1125    0.1489    0.5191
Pt    0.1101    0.1494    0.5569
Pt    0.1121    0.1503    0.5938
Pt    0.1132    0.1871    0.5195
Pt    0.1121    0.1880    0.5564
Pt    0.1124    0.1859    0.5937
Pt    0.1121    0.2238    0.5194
Pt    0.1124    0.2232    0.5570
Pt    0.1126    0.2248    0.5936
Pt    0.1681    0.0915    0.5551
Pt    0.1683    0.0925    0.5190
Pt    0.1683    0.0554    0.5931
Pt    0.1493    0.0364    0.5192
Pt    0.1496    0.0347    0.5565
Pt    0.1490    0.0362    0.5935
Pt    0.1487    0.0735    0.5186
Pt    0.1495    0.0732    0.5549
Pt    0.1486    0.0736    0.5937
Pt    0.1479    0.1111    0.5195
Pt    0.1499    0.1112    0.5561
Pt    0.1489    0.1112    0.5929
Pt    0.1492    0.1487    0.5189
Pt    0.1494    0.1485    0.5570
Pt    0.1498    0.1485    0.5939
Pt    0.1495    0.1856    0.5205
Pt    0.1499    0.1855    0.5566
Pt    0.1513    0.1863    0.5931
Pt    0.1495    0.2245    0.5180
Pt    0.1502    0.2238    0.5577
Pt    0.1503    0.2238    0.5939
Pt    0.1669    0.0553    0.5560
Pt    0.1681    0.0536    0.5181
Pt    0.1680    0.0181    0.5945
Pt    0.1880    0.0354    0.5200
Pt    0.1865    0.0362    0.5557
Pt    0.1869    0.0381    0.5931
Pt    0.1882    0.0727    0.5187
Pt    0.1870    0.0742    0.5557
Pt    0.1873    0.0734    0.5937
Pt    0.1862    0.1104    0.5189
Pt    0.1858    0.1105    0.5562
Pt    0.1856    0.1109    0.5934
Pt    0.1868    0.1497    0.5192
Pt    0.1872    0.1488    0.5563
Pt    0.1870    0.1484    0.5932
Pt    0.1862    0.1860    0.5191
Pt    0.1868    0.1866    0.5560
Pt    0.1888    0.1872    0.5934
Pt    0.1875    0.2236    0.5188
Pt    0.1876    0.2245    0.5566
Pt    0.1868    0.2247    0.5943
Pt    0.1687    0.0170    0.5557
Pt    0.1692    0.0173    0.5194
Pt    0.1309    0.2426    0.5939
Pt    0.2247    0.0367    0.5187
Pt    0.2249    0.0357    0.5544
Pt    0.2251    0.0366    0.5937
Pt    0.2242    0.0735    0.5186
Pt    0.2236    0.0754    0.5557
Pt    0.2248    0.0742    0.5932
Pt    0.2246    0.1124    0.5182
Pt    0.2246    0.1102    0.5556
Pt    0.2240    0.1107    0.5933
Pt    0.2238    0.1490    0.5183
Pt    0.2244    0.1481    0.5553
Pt    0.2248    0.1484    0.5933
Pt    0.2229    0.1859    0.5181
Pt    0.2240    0.1863    0.5568
Pt    0.2250    0.1862    0.5923
Pt    0.2238    0.2234    0.5194
Pt    0.2247    0.2243    0.5573
Pt    0.2257    0.2246    0.5933
Pt    0.2439    0.0180    0.5191
Pt    0.2062    0.2444    0.5945
Pt    0.2060    0.2432    0.5563
Pt    0.2048    0.2427    0.5197
Pt    0.2067    0.2063    0.5940
Pt    0.2060    0.2054    0.5559
Pt    0.2064    0.2046    0.5185
Pt    0.2064    0.1669    0.5937
Pt    0.2055    0.1673    0.5551
Pt    0.2046    0.1677    0.5180
Pt    0.2056    0.1294    0.5931
Pt    0.2060    0.1294    0.5570
Pt    0.2054    0.1308    0.5192
Pt    0.2061    0.0912    0.5934
Pt    0.2060    0.0929    0.5554
Pt    0.2053    0.0933    0.5181
Pt    0.2063    0.0550    0.5931
Pt    0.2068    0.0561    0.5554
Pt    0.2067    0.0531    0.5177
Pt    0.2063    0.0178    0.5940
Pt    0.2054    0.0175    0.5567
Pt    0.2071    0.0168    0.5178
Pt    0.1689    0.2433    0.5942
Pt    0.1684    0.2429    0.5575
Pt    0.1680    0.2424    0.5179
Pt    0.1688    0.2063    0.5932
Pt    0.0927    0.1690    0.5920
Pt    0.0383    0.0174    0.5395
Pt    0.0381    0.0176    0.5744
Pt    0.0384    0.0175    0.6146
Pt    0.0934    0.1695    0.5562
Pt    0.0361    0.0562    0.5381
Pt    0.0384    0.0552    0.5757
Pt    0.0377    0.0544    0.6142
Pt    0.0941    0.1680    0.5189
Pt    0.0360    0.0941    0.5384
Pt    0.0366    0.0941    0.5745
Pt    0.0363    0.0926    0.6120
Pt    0.0924    0.1306    0.5934
Pt    0.0378    0.1310    0.5361
Pt    0.0378    0.1292    0.5753
Pt    0.0371    0.1297    0.6121
Pt    0.0928    0.1301    0.5556
Pt    0.0360    0.1682    0.5368
Pt    0.0368    0.1676    0.5746
Pt    0.0378    0.1680    0.6119
Pt    0.0935    0.1304    0.5199
Pt    0.0373    0.2058    0.5375
Pt    0.0370    0.2065    0.5737
Pt    0.0390    0.2046    0.6118
Pt    0.0938    0.0923    0.5930
Pt    0.0372    0.2423    0.5370
Pt    0.0383    0.2422    0.5751
Pt    0.0381    0.2430    0.6128
Pt    0.0926    0.0930    0.5568
Pt    0.0756    0.0180    0.5374
Pt    0.0754    0.0166    0.5749
Pt    0.0754    0.0197    0.6125
Pt    0.0932    0.0941    0.5193
Pt    0.0743    0.0568    0.5383
Pt    0.0745    0.0565    0.5755
Pt    0.0747    0.0551    0.6123
Pt    0.0930    0.0561    0.5941
Pt    0.0737    0.0936    0.5364
Pt    0.0749    0.0922    0.5749
Pt    0.0735    0.0926    0.6129
Pt    0.0931    0.0560    0.5558
Pt    0.0744    0.1328    0.5374
Pt    0.0744    0.1300    0.5751
Pt    0.0751    0.1310    0.6126
Pt    0.0925    0.0553    0.5196
Pt    0.0738    0.1691    0.5360
Pt    0.0728    0.1689    0.5733
Pt    0.0747    0.1685    0.6115
Pt    0.0946    0.0179    0.5935
Pt    0.0745    0.2060    0.5373
Pt    0.0741    0.2054    0.5741
Pt    0.0753    0.2059    0.6120
Pt    0.0939    0.0176    0.5559
Pt    0.0751    0.2425    0.5370
Pt    0.0742    0.2433    0.5749
Pt    0.0751    0.2430    0.6123
Pt    0.0935    0.0165    0.5172
Pt    0.1117    0.0160    0.5371
Pt    0.1114    0.0171    0.5739
Pt    0.1127    0.0180    0.6124
Pt    0.0562    0.2432    0.5944
Pt    0.1117    0.0558    0.5385
Pt    0.1109    0.0552    0.5750
Pt    0.1125    0.0538    0.6126
Pt    0.0556    0.2426    0.5557
Pt    0.1117    0.0932    0.5375
Pt    0.1126    0.0926    0.5743
Pt    0.1119    0.0924    0.6127
Pt    0.0559    0.2419    0.5181
Pt    0.1122    0.1308    0.5370
Pt    0.1114    0.1298    0.5759
Pt    0.1117    0.1314    0.6120
Pt    0.0563    0.2054    0.5928
Pt    0.1111    0.1679    0.5380
Pt    0.1118    0.1684    0.5752
Pt    0.1117    0.1690    0.6126
Pt    0.0546    0.2044    0.5560
Pt    0.1131    0.2054    0.5378
Pt    0.1138    0.2061    0.5765
Pt    0.1127    0.2046    0.6124
Pt    0.0547    0.2054    0.5183
Pt    0.1126    0.2429    0.5364
Pt    0.1124    0.2427    0.5752
Pt    0.1114    0.2428    0.6117
Pt    0.0553    0.1685    0.5935
Pt    0.1486    0.0166    0.5375
Pt    0.1498    0.0167    0.5746
Pt    0.1490    0.0173    0.6121
Pt    0.0548    0.1686    0.5542
Pt    0.1492    0.0543    0.5379
Pt    0.1489    0.0553    0.5747
Pt    0.1483    0.0554    0.6115
Pt    0.0550    0.1678    0.5183
Pt    0.1492    0.0923    0.5367
Pt    0.1495    0.0925    0.5747
Pt    0.1487    0.0926    0.6116
Pt    0.0564    0.1305    0.5941
Pt    0.1494    0.1303    0.5380
Pt    0.1500    0.1290    0.5744
Pt    0.1486    0.1303    0.6112
Pt    0.0551    0.1315    0.5556
Pt    0.1494    0.1666    0.5388
Pt    0.1491    0.1679    0.5766
Pt    0.1509    0.1674    0.6122
Pt    0.0549    0.1323    0.5175
Pt    0.1491    0.2061    0.5382
Pt    0.1499    0.2046    0.5751
Pt    0.1500    0.2052    0.6127
Pt    0.0561    0.0936    0.5933
Pt    0.1497    0.2431    0.5377
Pt    0.1494    0.2438    0.5762
Pt    0.1507    0.2425    0.6125
Pt    0.0550    0.0943    0.5551
Pt    0.1869    0.0167    0.5375
Pt    0.1870    0.0181    0.5752
Pt    0.1871    0.0191    0.6114
Pt    0.0543    0.0956    0.5186
Pt    0.1863    0.0542    0.5375
Pt    0.1866    0.0547    0.5739
Pt    0.1881    0.0547    0.6120
Pt    0.0561    0.0551    0.5940
Pt    0.1875    0.0914    0.5376
Pt    0.1867    0.0920    0.5753
Pt    0.1862    0.0918    0.6123
Pt    0.0552    0.0557    0.5555
Pt    0.1869    0.1305    0.5368
Pt    0.1871    0.1303    0.5753
Pt    0.1863    0.1286    0.6120
Pt    0.0554    0.0575    0.5203
Pt    0.1867    0.1677    0.5373
Pt    0.1870    0.1679    0.5757
Pt    0.1871    0.1673    0.6117
Pt    0.0564    0.0159    0.5946
Pt    0.1874    0.2066    0.5382
Pt    0.1871    0.2067    0.5756
Pt    0.1890    0.2069    0.6121
Pt    0.0570    0.0177    0.5561
Pt    0.1856    0.2433    0.5368
Pt    0.1872    0.2428    0.5761
Pt    0.1872    0.2431    0.6125
Pt    0.0553    0.0190    0.5201
Pt    0.2267    0.0176    0.5366
Pt    0.2237    0.0176    0.5748
Pt    0.2261    0.0163    0.6125
Pt    0.0199    0.2432    0.5938
Pt    0.2252    0.0555    0.5369
Pt    0.2243    0.0557    0.5740
Pt    0.2251    0.0551    0.6124
Pt    0.0184    0.2432    0.5557
Pt    0.2246    0.0932    0.5359
Pt    0.2240    0.0924    0.5755
Pt    0.2256    0.0927    0.6118
Pt    0.0165    0.2428    0.5175
Pt    0.2238    0.1295    0.5371
Pt    0.2253    0.1302    0.5750
Pt    0.2242    0.1291    0.6123
Pt    0.0191    0.2061    0.5938
Pt    0.2243    0.1657    0.5365
Pt    0.2247    0.1671    0.5749
Pt    0.2250    0.1678    0.6120
Pt    0.0186    0.2056    0.5568
Pt    0.2242    0.2054    0.5386
Pt    0.2238    0.2055    0.5745
Pt    0.2260    0.2043    0.6118
Pt    0.0189    0.2053    0.5182
Pt    0.2238    0.2421    0.5376
Pt    0.2245    0.2431    0.5756
Pt    0.2259    0.2434    0.6121
Pt    0.1298    0.2436    0.5559
Pt    0.1308    0.2415    0.5181
Pt    0.1323    0.2039    0.5940
Pt    0.1319    0.2051    0.5565
Pt    0.0193    0.1685    0.5935
Pt    0.0190    0.0368    0.5384
Pt    0.0192    0.0362    0.5751
Pt    0.0195    0.0356    0.6128
Pt    0.0182    0.1661    0.5552
Pt    0.0174    0.0754    0.5377
Pt    0.0187    0.0747    0.5763
Pt    0.0185    0.0730    0.6131
Pt    0.0175    0.1678    0.5183
Pt    0.0186    0.1124    0.5376
Pt    0.0173    0.1127    0.5757
Pt    0.0180    0.1111    0.6113
Pt    0.0181    0.1298    0.5943
Pt    0.0189    0.1489    0.5377
Pt    0.0184    0.1486    0.5761
Pt    0.0194    0.1493    0.6125
Pt    0.0171    0.1291    0.5568
Pt    0.0171    0.1881    0.5369
Pt    0.0189    0.1866    0.5740
Pt    0.0180    0.1861    0.6118
Pt    0.0171    0.1312    0.5176
Pt    0.0175    0.2241    0.5374
Pt    0.0186    0.2248    0.5751
Pt    0.0197    0.2240    0.6118
Pt    0.1314    0.2051    0.5197
Pt    0.1310    0.1682    0.5938
Pt    0.1301    0.1652    0.5571
Pt    0.1309    0.1677    0.5192
Pt    0.0183    0.0926    0.5936
Pt    0.0560    0.0383    0.5382
Pt    0.0570    0.0364    0.5747
Pt    0.0562    0.0357    0.6124
Pt    0.0176    0.0937    0.5578
Pt    0.0564    0.0767    0.5377
Pt    0.0545    0.0746    0.5758
Pt    0.0545    0.0744    0.6129
Pt    0.0185    0.0946    0.5181
Pt    0.0561    0.1126    0.5360
Pt    0.0564    0.1122    0.5743
Pt    0.0564    0.1118    0.6123
Pt    0.0200    0.0546    0.5943
Pt    0.0551    0.1503    0.5378
Pt    0.0555    0.1477    0.5755
Pt    0.0548    0.1497    0.6122
Pt    0.0179    0.0559    0.5576
Pt    0.0547    0.1869    0.5355
Pt    0.0552    0.1868    0.5744
Pt    0.0573    0.1868    0.6118
Pt    0.0178    0.0585    0.5194
Pt    0.0562    0.2241    0.5371
Pt    0.0560    0.2233    0.5749
Pt    0.0572    0.2244    0.6125
Pt    0.1311    0.1304    0.5923
Pt    0.1288    0.1301    0.5566
Pt    0.1307    0.1303    0.5185
Pt    0.0177    0.0163    0.5948
Pt    0.0928    0.0378    0.5375
Pt    0.0924    0.0367    0.5745
Pt    0.0941    0.0364    0.6109
Pt    0.0198    0.0171    0.5573
Pt    0.0921    0.0752    0.5375
Pt    0.0930    0.0732    0.5745
Pt    0.0931    0.0748    0.6117
Pt    0.0182    0.0194    0.5200
Pt    0.0937    0.1117    0.5377
Pt    0.0931    0.1116    0.5743
Pt    0.0940    0.1121    0.6122
Pt    0.2441    0.2239    0.6115
Pt    0.0922    0.1506    0.5376
Pt    0.0918    0.1486    0.5747
Pt    0.0934    0.1488    0.6129
Pt    0.2439    0.2243    0.5745
Pt    0.0933    0.1873    0.5372
Pt    0.0942    0.1886    0.5750
Pt    0.0929    0.1872    0.6114
Pt    0.2434    0.2235    0.5387
Pt    0.0946    0.2237    0.5377
Pt    0.0936    0.2255    0.5753
Pt    0.0936    0.2247    0.6122
Pt    0.1300    0.0922    0.5947
Pt    0.1325    0.0932    0.5561
Pt    0.1300    0.0925    0.5193
Pt    0.1308    0.0533    0.5931
Pt    0.2440    0.1856    0.6112
Pt    0.1293    0.0359    0.5373
Pt    0.1302    0.0360    0.5738
Pt    0.1303    0.0365    0.6147
Pt    0.2437    0.1862    0.5740
Pt    0.1302    0.0743    0.5381
Pt    0.1301    0.0742    0.5738
Pt    0.1306    0.0733    0.6124
Pt    0.2414    0.1849    0.5384
Pt    0.1302    0.1122    0.5377
Pt    0.1308    0.1102    0.5759
Pt    0.1303    0.1121    0.6123
Pt    0.2437    0.1482    0.6123
Pt    0.1315    0.1488    0.5378
Pt    0.1307    0.1485    0.5749
Pt    0.1312    0.1502    0.6123
Pt    0.2433    0.1479    0.5737
Pt    0.1317    0.1855    0.5397
Pt    0.1309    0.1856    0.5751
Pt    0.1311    0.1858    0.6116
Pt    0.2445    0.1482    0.5361
Pt    0.1312    0.2242    0.5376
Pt    0.1309    0.2245    0.5741
Pt    0.1306    0.2224    0.6123
Pt    0.1310    0.0554    0.5566
Pt    0.1306    0.0544    0.5186
Pt    0.1308    0.0181    0.5927
Pt    0.1294    0.0174    0.5549
Pt    0.2431    0.1108    0.6121
Pt    0.1684    0.0357    0.5370
Pt    0.1677    0.0358    0.5748
Pt    0.1678    0.0364    0.6119
Pt    0.2443    0.1118    0.5731
Pt    0.1690    0.0730    0.5359
Pt    0.1685    0.0742    0.5752
Pt    0.1683    0.0732    0.6111
Pt    0.2426    0.1112    0.5364
Pt    0.1677    0.1112    0.5374
Pt    0.1684    0.1112    0.5752
Pt    0.1665    0.1122    0.6125
Pt    0.2434    0.0746    0.6117
Pt    0.1677    0.1480    0.5380
Pt    0.1675    0.1485    0.5759
Pt    0.1685    0.1483    0.6124
Pt    0.2429    0.0746    0.5745
Pt    0.1678    0.1873    0.5383
Pt    0.1690    0.1869    0.5758
Pt    0.1694    0.1869    0.6115
Pt    0.2432    0.0745    0.5356
Pt    0.1690    0.2246    0.5376
Pt    0.1685    0.2248    0.5758
Pt    0.1693    0.2243    0.6134
Pt    0.1284    0.0186    0.5170
Pt    0.0924    0.2440    0.5935
Pt    0.0944    0.2415    0.5548
Pt    0.0941    0.2423    0.5181
Pt    0.2445    0.0358    0.6117
Pt    0.2061    0.0365    0.5382
Pt    0.2057    0.0362    0.5743
Pt    0.2062    0.0354    0.6119
Pt    0.2443    0.0372    0.5743
Pt    0.2066    0.0733    0.5373
Pt    0.2049    0.0740    0.5742
Pt    0.2058    0.0727    0.6115
Pt    0.2436    0.0374    0.5374
Pt    0.2051    0.1116    0.5384
Pt    0.2064    0.1112    0.5747
Pt    0.2060    0.1100    0.6113
Pt    0.0938    0.2045    0.5178
Pt    0.2054    0.1490    0.5379
Pt    0.2059    0.1482    0.5748
Pt    0.2056    0.1480    0.6126
Pt    0.0926    0.2055    0.5565
Pt    0.2062    0.1869    0.5378
Pt    0.2053    0.1864    0.5746
Pt    0.2058    0.1866    0.6114
Pt    0.0935    0.2064    0.5933
Pt    0.2047    0.2244    0.5375
Pt    0.2060    0.2255    0.5746
Pt    0.2077    0.2244    0.6115
Pt    0.0014    0.2428    0.6120
Pt    0.0748    0.0945    0.5013
Pt    0.1118    0.0921    0.5016
Pt    0.2398    0.2400    0.7421
Pt    0.2454    0.2436    0.7071
Pt    0.2449    0.2424    0.6698
Pt    0.2443    0.2426    0.6309
Pt    0.2428    0.2047    0.7437
Pt    0.2441    0.2054    0.7057
Pt    0.2436    0.2052    0.6702
Pt    0.2440    0.2052    0.6301
Pt    0.2436    0.1681    0.7440
Pt    0.2444    0.1691    0.7063
Pt    0.2432    0.1678    0.6684
Pt    0.2431    0.1681    0.6309
Pt    0.2426    0.1298    0.7439
Pt    0.2440    0.1301    0.7053
Pt    0.2439    0.1292    0.6677
Pt    0.2433    0.1295    0.6310
Pt    0.2446    0.0934    0.7438
Pt    0.2427    0.0930    0.7061
Pt    0.2421    0.0920    0.6683
Pt    0.2430    0.0928    0.6305
Pt    0.2418    0.0570    0.7435
Pt    0.2430    0.0569    0.7056
Pt    0.2451    0.0558    0.6667
Pt    0.2429    0.0547    0.6307
Pt    0.2423    0.0200    0.7429
Pt    0.2432    0.0193    0.7047
Pt    0.2442    0.0179    0.6678
Pt    0.2050    0.0555    0.7420
Pt    0.2058    0.0557    0.7061
Pt    0.2042    0.0548    0.6679
Pt    0.2060    0.0548    0.6311
Pt    0.0359    0.0358    0.6324
Pt    0.0372    0.0362    0.6698
Pt    0.0369    0.0370    0.7073
Pt    0.0371    0.0360    0.7446
Pt    0.0364    0.0730    0.6327
Pt    0.0368    0.0720    0.6685
Pt    0.0369    0.0731    0.7061
Pt    0.0385    0.0730    0.7439
Pt    0.0376    0.1107    0.6304
Pt    0.0369    0.1107    0.6702
Pt    0.0362    0.1097    0.7069
Pt    0.0376    0.1125    0.7452
Pt    0.0381    0.1501    0.6314
Pt    0.0379    0.1495    0.6691
Pt    0.0378    0.1488    0.7076
Pt    0.0359    0.1488    0.7447
Pt    0.0379    0.1873    0.6304
Pt    0.0388    0.1867    0.6697
Pt    0.0361    0.1863    0.7067
Pt    0.0377    0.1864    0.7425
Pt    0.0378    0.2238    0.6315
Pt    0.0382    0.2233    0.6672
Pt    0.0363    0.2238    0.7054
Pt    0.0382    0.2217    0.7441
Pt    0.2036    0.0193    0.7428
Pt    0.2045    0.0196    0.7044
Pt    0.2054    0.0186    0.6682
Pt    0.2062    0.0182    0.6307
Pt    0.0739    0.0377    0.6318
Pt    0.0744    0.0362    0.6685
Pt    0.0744    0.0359    0.7066
Pt    0.0738    0.0361    0.7436
Pt    0.0743    0.0727    0.6313
Pt    0.0745    0.0741    0.6690
Pt    0.0742    0.0729    0.7059
Pt    0.0742    0.0738    0.7451
Pt    0.0753    0.1118    0.6305
Pt    0.0739    0.1106    0.6685
Pt    0.0733    0.1115    0.7052
Pt    0.0733    0.1125    0.7433
Pt    0.0741    0.1492    0.6310
Pt    0.0760    0.1483    0.6677
Pt    0.0757    0.1497    0.7059
Pt    0.0746    0.1496    0.7432
Pt    0.0744    0.1866    0.6308
Pt    0.0755    0.1863    0.6688
Pt    0.0740    0.1857    0.7065
Pt    0.0764    0.1872    0.7429
Pt    0.0765    0.2254    0.6311
Pt    0.0749    0.2248    0.6682
Pt    0.0756    0.2229    0.7062
Pt    0.0755    0.2237    0.7427
Pt    0.1702    0.2417    0.7434
Pt    0.1705    0.2418    0.7056
Pt    0.1680    0.2427    0.6669
Pt    0.1688    0.2428    0.6305
Pt    0.1114    0.0367    0.6323
Pt    0.1122    0.0368    0.6682
Pt    0.1131    0.0361    0.7061
Pt    0.1100    0.0370    0.7440
Pt    0.1116    0.0744    0.6308
Pt    0.1103    0.0743    0.6681
Pt    0.1118    0.0745    0.7071
Pt    0.1119    0.0748    0.7437
Pt    0.1115    0.1130    0.6312
Pt    0.1108    0.1120    0.6704
Pt    0.1114    0.1117    0.7053
Pt    0.1110    0.1124    0.7426
Pt    0.1125    0.1488    0.6316
Pt    0.1131    0.1486    0.6685
Pt    0.1124    0.1481    0.7065
Pt    0.1122    0.1499    0.7450
Pt    0.1118    0.1858    0.6329
Pt    0.1128    0.1852    0.6688
Pt    0.1125    0.1874    0.7061
Pt    0.1131    0.1869    0.7437
Pt    0.1124    0.2242    0.6304
Pt    0.1135    0.2242    0.6693
Pt    0.1146    0.2242    0.7049
Pt    0.1134    0.2235    0.7432
Pt    0.1686    0.2050    0.7431
Pt    0.1698    0.2051    0.7062
Pt    0.1693    0.2070    0.6669
Pt    0.1700    0.2060    0.6313
Pt    0.1500    0.0377    0.6308
Pt    0.1502    0.0371    0.6677
Pt    0.1490    0.0363    0.7062
Pt    0.1498    0.0377    0.7445
Pt    0.1498    0.0733    0.6301
Pt    0.1490    0.0749    0.6694
Pt    0.1495    0.0763    0.7061
Pt    0.1488    0.0752    0.7432
Pt    0.1490    0.1103    0.6303
Pt    0.1500    0.1124    0.6666
Pt    0.1503    0.1127    0.7050
Pt    0.1494    0.1116    0.7426
Pt    0.1500    0.1489    0.6310
Pt    0.1509    0.1495    0.6681
Pt    0.1496    0.1492    0.7043
Pt    0.1487    0.1484    0.7423
Pt    0.1495    0.1872    0.6318
Pt    0.1512    0.1869    0.6681
Pt    0.1518    0.1867    0.7055
Pt    0.1504    0.1860    0.7427
Pt    0.1495    0.2244    0.6301
Pt    0.1503    0.2250    0.6668
Pt    0.1519    0.2223    0.7045
Pt    0.1506    0.2242    0.7433
Pt    0.1683    0.1674    0.7417
Pt    0.1694    0.1671    0.7051
Pt    0.1698    0.1692    0.6680
Pt    0.1689    0.1684    0.6292
Pt    0.1874    0.0359    0.6307
Pt    0.1861    0.0368    0.6676
Pt    0.1864    0.0375    0.7048
Pt    0.1850    0.0372    0.7444
Pt    0.1866    0.0738    0.6302
Pt    0.1870    0.0752    0.6682
Pt    0.1874    0.0749    0.7059
Pt    0.1866    0.0741    0.7450
Pt    0.1865    0.1110    0.6314
Pt    0.1873    0.1120    0.6672
Pt    0.1874    0.1120    0.7055
Pt    0.1868    0.1123    0.7432
Pt    0.1878    0.1490    0.6312
Pt    0.1882    0.1501    0.6671
Pt    0.1874    0.1487    0.7060
Pt    0.1868    0.1483    0.7426
Pt    0.1884    0.1881    0.6304
Pt    0.1890    0.1875    0.6680
Pt    0.1882    0.1860    0.7054
Pt    0.1881    0.1856    0.7433
Pt    0.1879    0.2250    0.6308
Pt    0.1877    0.2227    0.6672
Pt    0.1887    0.2243    0.7052
Pt    0.1881    0.2235    0.7430
Pt    0.1678    0.1301    0.7435
Pt    0.1696    0.1295    0.7048
Pt    0.1703    0.1319    0.6681
Pt    0.1679    0.1304    0.6313
Pt    0.2247    0.0356    0.6303
Pt    0.2255    0.0371    0.6678
Pt    0.2244    0.0380    0.7056
Pt    0.2221    0.0373    0.7424
Pt    0.2244    0.0738    0.6303
Pt    0.2242    0.0729    0.6680
Pt    0.2231    0.0747    0.7047
Pt    0.2245    0.0753    0.7443
Pt    0.2242    0.1103    0.6315
Pt    0.2247    0.1117    0.6693
Pt    0.2252    0.1120    0.7050
Pt    0.2254    0.1115    0.7442
Pt    0.2254    0.1476    0.6303
Pt    0.2252    0.1496    0.6687
Pt    0.2258    0.1490    0.7058
Pt    0.2256    0.1497    0.7427
Pt    0.2258    0.1877    0.6318
Pt    0.2257    0.1867    0.6682
Pt    0.2256    0.1860    0.7067
Pt    0.2258    0.1854    0.7438
Pt    0.2259    0.2233    0.6294
Pt    0.2259    0.2251    0.6681
Pt    0.2260    0.2239    0.7049
Pt    0.2228    0.2232    0.7430
Pt    0.2432    0.0182    0.6317
Pt    0.2074    0.2427    0.7428
Pt    0.2076    0.2427    0.7061
Pt    0.2071    0.2433    0.6678
Pt    0.2074    0.2431    0.6311
Pt    0.2076    0.2037    0.7430
Pt    0.2070    0.2043    0.7061
Pt    0.2074    0.2052    0.6675
Pt    0.2073    0.2052    0.6310
Pt    0.2065    0.1661    0.7439
Pt    0.2053    0.1664    0.7063
Pt    0.2077    0.1674    0.6681
Pt    0.2070    0.1685    0.6307
Pt    0.2075    0.1295    0.7445
Pt    0.2066    0.1309    0.7058
Pt    0.2058    0.1309    0.6675
Pt    0.2063    0.1293    0.6300
Pt    0.2056    0.0937    0.7427
Pt    0.2057    0.0944    0.7065
Pt    0.2068    0.0926    0.6677
Pt    0.2051    0.0911    0.6300
Pt    0.0364    0.0184    0.6507
Pt    0.0367    0.0180    0.6889
Pt    0.0368    0.0194    0.7259
Pt    0.0357    0.0542    0.6510
Pt    0.0366    0.0547    0.6883
Pt    0.0376    0.0546    0.7256
Pt    0.0367    0.0924    0.6509
Pt    0.0369    0.0906    0.6883
Pt    0.0374    0.0911    0.7248
Pt    0.0382    0.1309    0.6501
Pt    0.0369    0.1287    0.6902
Pt    0.0355    0.1296    0.7253
Pt    0.0385    0.1687    0.6492
Pt    0.0375    0.1677    0.6880
Pt    0.0368    0.1673    0.7266
Pt    0.0377    0.2045    0.6492
Pt    0.0366    0.2063    0.6878
Pt    0.0366    0.2047    0.7246
Pt    0.0376    0.2429    0.6486
Pt    0.0377    0.2430    0.6865
Pt    0.0372    0.2413    0.7246
Pt    0.0742    0.0178    0.6500
Pt    0.0752    0.0184    0.6879
Pt    0.0737    0.0167    0.7256
Pt    0.0751    0.0557    0.6519
Pt    0.0740    0.0552    0.6876
Pt    0.0733    0.0546    0.7252
Pt    0.0740    0.0919    0.6483
Pt    0.0752    0.0927    0.6870
Pt    0.0734    0.0921    0.7251
Pt    0.0737    0.1287    0.6494
Pt    0.0738    0.1309    0.6867
Pt    0.0730    0.1307    0.7250
Pt    0.0739    0.1672    0.6499
Pt    0.0739    0.1675    0.6862
Pt    0.0745    0.1679    0.7250
Pt    0.0761    0.2058    0.6496
Pt    0.0756    0.2044    0.6864
Pt    0.0746    0.2045    0.7248
Pt    0.0764    0.2426    0.6497
Pt    0.0757    0.2422    0.6876
Pt    0.0752    0.2426    0.7251
Pt    0.1122    0.0184    0.6499
Pt    0.1121    0.0178    0.6887
Pt    0.1110    0.0183    0.7258
Pt    0.1117    0.0568    0.6503
Pt    0.1131    0.0560    0.6885
Pt    0.1110    0.0558    0.7245
Pt    0.1116    0.0943    0.6499
Pt    0.1114    0.0922    0.6877
Pt    0.1108    0.0927    0.7244
Pt    0.1125    0.1296    0.6501
Pt    0.1124    0.1309    0.6871
Pt    0.1123    0.1304    0.7248
Pt    0.1136    0.1673    0.6502
Pt    0.1135    0.1678    0.6878
Pt    0.1133    0.1676    0.7241
Pt    0.1118    0.2046    0.6501
Pt    0.1130    0.2050    0.6871
Pt    0.1122    0.2055    0.7245
Pt    0.1139    0.2433    0.6492
Pt    0.1131    0.2424    0.6872
Pt    0.1128    0.2419    0.7236
Pt    0.1494    0.0189    0.6490
Pt    0.1490    0.0181    0.6875
Pt    0.1493    0.0189    0.7267
Pt    0.1490    0.0566    0.6489
Pt    0.1483    0.0558    0.6886
Pt    0.1485    0.0560    0.7244
Pt    0.1501    0.0914    0.6495
Pt    0.1489    0.0940    0.6864
Pt    0.1498    0.0939    0.7244
Pt    0.1513    0.1309    0.6494
Pt    0.1511    0.1306    0.6861
Pt    0.1498    0.1302    0.7238
Pt    0.1502    0.1681    0.6496
Pt    0.1502    0.1685    0.6873
Pt    0.1494    0.1672    0.7237
Pt    0.1506    0.2058    0.6489
Pt    0.1516    0.2059    0.6851
Pt    0.1499    0.2056    0.7247
Pt    0.1493    0.2438    0.6474
Pt    0.1507    0.2421    0.6860
Pt    0.1501    0.2424    0.7244
Pt    0.1867    0.0183    0.6489
Pt    0.1863    0.0184    0.6855
Pt    0.1845    0.0186    0.7241
Pt    0.1870    0.0562    0.6492
Pt    0.1858    0.0557    0.6872
Pt    0.1859    0.0571    0.7238
Pt    0.1885    0.0933    0.6488
Pt    0.1880    0.0924    0.6876
Pt    0.1880    0.0923    0.7248
Pt    0.1885    0.1314    0.6485
Pt    0.1867    0.1296    0.6872
Pt    0.1881    0.1300    0.7244
Pt    0.1893    0.1685    0.6483
Pt    0.1882    0.1684    0.6870
Pt    0.1882    0.1669    0.7244
Pt    0.1892    0.2052    0.6480
Pt    0.1886    0.2046    0.6878
Pt    0.1875    0.2033    0.7251
Pt    0.1886    0.2436    0.6488
Pt    0.1873    0.2429    0.6864
Pt    0.1887    0.2434    0.7248
Pt    0.2245    0.0171    0.6492
Pt    0.2238    0.0190    0.6873
Pt    0.2228    0.0197    0.7234
Pt    0.2247    0.0553    0.6484
Pt    0.2246    0.0553    0.6866
Pt    0.2248    0.0565    0.7244
Pt    0.2250    0.0911    0.6495
Pt    0.2246    0.0935    0.6869
Pt    0.2256    0.0934    0.7244
Pt    0.2257    0.1291    0.6499
Pt    0.2251    0.1293    0.6875
Pt    0.2245    0.1294    0.7245
Pt    0.2261    0.1673    0.6495
Pt    0.2256    0.1663    0.6878
Pt    0.2247    0.1677    0.7243
Pt    0.2267    0.2059    0.6501
Pt    0.2247    0.2061    0.6875
Pt    0.2255    0.2050    0.7247
Pt    0.2263    0.2428    0.6502
Pt    0.2258    0.2426    0.6876
Pt    0.2259    0.2426    0.7233
Pt    0.1684    0.0937    0.7434
Pt    0.1692    0.0939    0.7055
Pt    0.1697    0.0932    0.6686
Pt    0.0177    0.0360    0.6511
Pt    0.0176    0.0366    0.6886
Pt    0.0179    0.0359    0.7264
Pt    0.0177    0.0734    0.6506
Pt    0.0173    0.0740    0.6882
Pt    0.0185    0.0731    0.7272
Pt    0.0199    0.1124    0.6506
Pt    0.0180    0.1106    0.6887
Pt    0.0184    0.1106    0.7253
Pt    0.0192    0.1497    0.6491
Pt    0.0200    0.1488    0.6878
Pt    0.0168    0.1493    0.7247
Pt    0.0192    0.1853    0.6487
Pt    0.0187    0.1865    0.6864
Pt    0.0178    0.1860    0.7246
Pt    0.0181    0.2241    0.6494
Pt    0.0181    0.2248    0.6855
Pt    0.0178    0.2233    0.7235
Pt    0.1676    0.0925    0.6310
Pt    0.1685    0.0569    0.7430
Pt    0.1676    0.0560    0.7053
Pt    0.0546    0.0371    0.6500
Pt    0.0558    0.0357    0.6878
Pt    0.0560    0.0351    0.7259
Pt    0.0553    0.0726    0.6505
Pt    0.0558    0.0729    0.6871
Pt    0.0562    0.0731    0.7256
Pt    0.0559    0.1110    0.6506
Pt    0.0557    0.1100    0.6872
Pt    0.0545    0.1111    0.7253
Pt    0.0567    0.1488    0.6494
Pt    0.0549    0.1486    0.6889
Pt    0.0550    0.1488    0.7254
Pt    0.0565    0.1867    0.6501
Pt    0.0567    0.1865    0.6882
Pt    0.0560    0.1869    0.7247
Pt    0.0571    0.2246    0.6484
Pt    0.0569    0.2231    0.6868
Pt    0.0560    0.2233    0.7250
Pt    0.1677    0.0563    0.6672
Pt    0.1691    0.0548    0.6303
Pt    0.1669    0.0168    0.7449
Pt    0.0927    0.0373    0.6499
Pt    0.0930    0.0369    0.6873
Pt    0.0925    0.0358    0.7255
Pt    0.0932    0.0746    0.6493
Pt    0.0927    0.0736    0.6877
Pt    0.0922    0.0728    0.7249
Pt    0.0928    0.1110    0.6507
Pt    0.0924    0.1113    0.6874
Pt    0.0914    0.1109    0.7237
Pt    0.0943    0.1499    0.6496
Pt    0.0947    0.1505    0.6868
Pt    0.0937    0.1477    0.7257
Pt    0.0922    0.1856    0.6497
Pt    0.0930    0.1851    0.6875
Pt    0.0952    0.1861    0.7245
Pt    0.0945    0.2240    0.6495
Pt    0.0936    0.2232    0.6869
Pt    0.0940    0.2246    0.7233
Pt    0.1676    0.0180    0.7046
Pt    0.1682    0.0173    0.6673
Pt    0.1675    0.0190    0.6305
Pt    0.1308    0.0368    0.6495
Pt    0.1304    0.0368    0.6866
Pt    0.1298    0.0365    0.7259
Pt    0.1300    0.0747    0.6509
Pt    0.1304    0.0746    0.6885
Pt    0.1303    0.0750    0.7243
Pt    0.1305    0.1111    0.6488
Pt    0.1305    0.1121    0.6866
Pt    0.1310    0.1110    0.7233
Pt    0.1311    0.1474    0.6500
Pt    0.1313    0.1493    0.6870
Pt    0.1312    0.1496    0.7245
Pt    0.1312    0.1865    0.6503
Pt    0.1326    0.1871    0.6856
Pt    0.1321    0.1862    0.7239
Pt    0.1313    0.2234    0.6495
Pt    0.1318    0.2235    0.6862
Pt    0.1318    0.2243    0.7239
Pt    0.1303    0.2435    0.7427
Pt    0.1327    0.2418    0.7053
Pt    0.1316    0.2428    0.6680
Pt    0.1674    0.0375    0.6495
Pt    0.1671    0.0374    0.6867
Pt    0.1677    0.0378    0.7253
Pt    0.1687    0.0740    0.6496
Pt    0.1677    0.0748    0.6876
Pt    0.1682    0.0760    0.7241
Pt    0.1687    0.1122    0.6487
Pt    0.1676    0.1114    0.6859
Pt    0.1691    0.1120    0.7242
Pt    0.1700    0.1501    0.6492
Pt    0.1694    0.1505    0.6869
Pt    0.1667    0.1482    0.7237
Pt    0.1695    0.1866    0.6488
Pt    0.1702    0.1872    0.6860
Pt    0.1687    0.1861    0.7246
Pt    0.1682    0.2247    0.6487
Pt    0.1704    0.2242    0.6866
Pt    0.1689    0.2240    0.7247
Pt    0.1304    0.2432    0.6305
Pt    0.1318    0.2047    0.7437
Pt    0.1334    0.2036    0.7051
Pt    0.2051    0.0362    0.6484
Pt    0.2064    0.0372    0.6865
Pt    0.2043    0.0371    0.7232
Pt    0.2058    0.0741    0.6498
Pt    0.2052    0.0734    0.6866
Pt    0.2061    0.0750    0.7244
Pt    0.2068    0.1120    0.6497
Pt    0.2058    0.1123    0.6869
Pt    0.2070    0.1115    0.7253
Pt    0.2075    0.1490    0.6484
Pt    0.2055    0.1474    0.6875
Pt    0.2064    0.1485    0.7259
Pt    0.2068    0.1872    0.6490
Pt    0.2077    0.1855    0.6871
Pt    0.2068    0.1865    0.7246
Pt    0.2067    0.2251    0.6489
Pt    0.2069    0.2241    0.6865
Pt    0.2055    0.2227    0.7238
Pt    0.1303    0.2051    0.6673
Pt    0.1315    0.2041    0.6309
Pt    0.1310    0.1687    0.7434
Pt    0.2442    0.0375    0.6493
Pt    0.2423    0.0368    0.6861
Pt    0.2418    0.0386    0.7239
Pt    0.2429    0.0734    0.6477
Pt    0.2436    0.0741    0.6870
Pt    0.2430    0.0751    0.7240
Pt    0.2430    0.1101    0.6500
Pt    0.2437    0.1112    0.6858
Pt    0.2436    0.1114    0.7242
Pt    0.2438    0.1486    0.6497
Pt    0.2448    0.1492    0.6857
Pt    0.2441    0.1487    0.7251
Pt    0.2453    0.1870    0.6499
Pt    0.2431    0.1869    0.6880
Pt    0.2436    0.1867    0.7252
Pt    0.2451    0.2238    0.6495
Pt    0.2448    0.2251    0.6880
Pt    0.2444    0.2239    0.7233
Pt    0.0170    0.0167    0.6323
Pt    0.0175    0.0180    0.6703
Pt    0.0181    0.0177    0.7081
Pt    0.0191    0.0173    0.7456
Pt    0.0182    0.0545    0.6312
Pt    0.0187    0.0560    0.6694
Pt    0.0182    0.0557    0.7079
Pt    0.0182    0.0547    0.7457
Pt    0.0186    0.0929    0.6310
Pt    0.0178    0.0929    0.6691
Pt    0.0167    0.0915    0.7074
Pt    0.0186    0.0927    0.7446
Pt    0.0198    0.1301    0.6309
Pt    0.0199    0.1298    0.6708
Pt    0.0171    0.1298    0.7066
Pt    0.0172    0.1318    0.7443
Pt    0.0185    0.1689    0.6300
Pt    0.0194    0.1677    0.6687
Pt    0.0181    0.1677    0.7076
Pt    0.0178    0.1676    0.7433
Pt    0.0193    0.2051    0.6302
Pt    0.0194    0.2058    0.6669
Pt    0.0177    0.2058    0.7051
Pt    0.0185    0.2034    0.7422
Pt    0.0187    0.2428    0.6301
Pt    0.0181    0.2434    0.6677
Pt    0.0193    0.2434    0.7052
Pt    0.0194    0.2419    0.7405
Pt    0.0568    0.0185    0.6321
Pt    0.0559    0.0178    0.6683
Pt    0.0551    0.0169    0.7063
Pt    0.0554    0.0169    0.7442
Pt    0.0563    0.0561    0.6315
Pt    0.0556    0.0548    0.6693
Pt    0.0553    0.0545    0.7065
Pt    0.0557    0.0546    0.7450
Pt    0.0551    0.0936    0.6318
Pt    0.0551    0.0914    0.6691
Pt    0.0572    0.0914    0.7055
Pt    0.0561    0.0926    0.7439
Pt    0.0551    0.1302    0.6298
Pt    0.0546    0.1298    0.6693
Pt    0.0561    0.1286    0.7073
Pt    0.0548    0.1311    0.7441
Pt    0.0567    0.1688    0.6315
Pt    0.0567    0.1682    0.6683
Pt    0.0553    0.1673    0.7063
Pt    0.0558    0.1677    0.7435
Pt    0.0584    0.2058    0.6310
Pt    0.0570    0.2049    0.6683
Pt    0.0559    0.2053    0.7052
Pt    0.0566    0.2052    0.7433
Pt    0.0568    0.2424    0.6304
Pt    0.0570    0.2430    0.6663
Pt    0.0554    0.2420    0.7055
Pt    0.0561    0.2426    0.7445
Pt    0.0929    0.0182    0.6309
Pt    0.0935    0.0188    0.6690
Pt    0.0932    0.0180    0.7063
Pt    0.0916    0.0173    0.7433
Pt    0.0940    0.0562    0.6307
Pt    0.0937    0.0540    0.6695
Pt    0.0931    0.0542    0.7075
Pt    0.0927    0.0551    0.7434
Pt    0.0927    0.0929    0.6301
Pt    0.0937    0.0927    0.6689
Pt    0.0924    0.0926    0.7069
Pt    0.0921    0.0934    0.7434
Pt    0.0923    0.1298    0.6319
Pt    0.0928    0.1301    0.6671
Pt    0.0928    0.1306    0.7053
Pt    0.0932    0.1307    0.7433
Pt    0.0933    0.1682    0.6301
Pt    0.0950    0.1677    0.6683
Pt    0.0940    0.1676    0.7067
Pt    0.0942    0.1672    0.7423
Pt    0.0943    0.2048    0.6307
Pt    0.0936    0.2052    0.6684
Pt    0.0936    0.2045    0.7053
Pt    0.0942    0.2052    0.7435
Pt    0.0952    0.2432    0.6316
Pt    0.0951    0.2427    0.6691
Pt    0.0933    0.2432    0.7062
Pt    0.0948    0.2418    0.7427
Pt    0.1300    0.0181    0.6313
Pt    0.1301    0.0197    0.6681
Pt    0.1315    0.0179    0.7061
Pt    0.1301    0.0192    0.7442
Pt    0.1295    0.0550    0.6310
Pt    0.1303    0.0563    0.6686
Pt    0.1303    0.0555    0.7064
Pt    0.1301    0.0562    0.7437
Pt    0.1307    0.0924    0.6311
Pt    0.1295    0.0937    0.6685
Pt    0.1302    0.0941    0.7045
Pt    0.1304    0.0940    0.7418
Pt    0.1308    0.1293    0.6311
Pt    0.1312    0.1303    0.6686
Pt    0.1307    0.1296    0.7056
Pt    0.1308    0.1301    0.7429
Pt    0.1309    0.1684    0.6316
Pt    0.1326    0.1670    0.6684
Pt    0.1312    0.1698    0.7049
Pt    0.2411    0.0015    0.7239
Pt    0.0019    0.1307    0.6497
Pt    0.0015    0.1114    0.6315
Pt    0.2225    0.0029    0.7425
Pt    0.0012    0.1487    0.6319
Pt    0.2036    0.0199    0.7802
Pt    0.2414    0.2049    0.8513
Pt    0.2421    0.2038    0.8174
Pt    0.1681    0.2043    0.8520
Pt    0.0371    0.0351    0.7816
Pt    0.0363    0.0370    0.8154
Pt    0.0364    0.0376    0.8516
Pt    0.0366    0.0748    0.7795
Pt    0.0376    0.0751    0.8160
Pt    0.0360    0.0756    0.8511
Pt    0.0370    0.1122    0.7803
Pt    0.0372    0.1131    0.8184
Pt    0.0371    0.1497    0.7824
Pt    0.0369    0.1863    0.7804
Pt    0.0365    0.2221    0.7788
Pt    0.2073    0.2045    0.8144
Pt    0.0744    0.0349    0.7818
Pt    0.0742    0.0357    0.8189
Pt    0.0749    0.0367    0.8508
Pt    0.0753    0.0736    0.7818
Pt    0.0746    0.0751    0.8174
Pt    0.0746    0.0743    0.8523
Pt    0.0744    0.1127    0.7813
Pt    0.0734    0.1119    0.8171
Pt    0.0736    0.1500    0.7814
Pt    0.0735    0.1856    0.7816
Pt    0.0751    0.2245    0.7803
Pt    0.1110    0.0371    0.7804
Pt    0.1139    0.0389    0.8169
Pt    0.1115    0.0749    0.7806
Pt    0.1132    0.0720    0.8190
Pt    0.1114    0.1110    0.7808
Pt    0.1127    0.1490    0.7820
Pt    0.1114    0.1870    0.7821
Pt    0.1133    0.2229    0.7796
Pt    0.1489    0.0373    0.7810
Pt    0.1477    0.0753    0.7823
Pt    0.1478    0.1104    0.7818
Pt    0.1494    0.1491    0.7798
Pt    0.1523    0.1474    0.8170
Pt    0.1506    0.1864    0.7789
Pt    0.1488    0.1865    0.8168
Pt    0.1487    0.2233    0.7803
Pt    0.1490    0.2248    0.8160
Pt    0.1863    0.0379    0.7832
Pt    0.1865    0.0744    0.7815
Pt    0.1873    0.1122    0.7814
Pt    0.1874    0.1478    0.7800
Pt    0.1868    0.1484    0.8168
Pt    0.1875    0.1849    0.7797
Pt    0.1864    0.1865    0.8164
Pt    0.1859    0.1859    0.8522
Pt    0.1876    0.2237    0.7788
Pt    0.1857    0.2251    0.8171
Pt    0.1861    0.2243    0.8523
Pt    0.2068    0.2043    0.7804
Pt    0.2223    0.0382    0.7809
Pt    0.2227    0.0766    0.7806
Pt    0.2256    0.1112    0.7829
Pt    0.2255    0.1490    0.7807
Pt    0.2252    0.1491    0.8168
Pt    0.2250    0.1855    0.7805
Pt    0.2253    0.1857    0.8160
Pt    0.2252    0.1843    0.8529
Pt    0.2254    0.2232    0.8162
Pt    0.2234    0.2248    0.8506
Pt    0.2440    0.1672    0.7797
Pt    0.2447    0.1300    0.7810
Pt    0.2417    0.0566    0.7820
Pt    0.2407    0.0196    0.7796
Pt    0.2035    0.2436    0.8522
Pt    0.2047    0.2403    0.8147
Pt    0.2055    0.2040    0.8523
Pt    0.1677    0.2050    0.8160
Pt    0.2405    0.0020    0.8714
Pt    0.0383    0.0172    0.7613
Pt    0.0381    0.0181    0.8356
Pt    0.0389    0.0199    0.8701
Pt    0.0379    0.0552    0.7625
Pt    0.0375    0.0548    0.7977
Pt    0.0368    0.0568    0.8342
Pt    0.0376    0.0566    0.8685
Pt    0.0370    0.0933    0.7618
Pt    0.0365    0.0929    0.7979
Pt    0.0371    0.0948    0.8346
Pt    0.0358    0.1321    0.7631
Pt    0.0359    0.1298    0.7994
Pt    0.0366    0.1676    0.7636
Pt    0.0372    0.2042    0.7614
Pt    0.0370    0.2048    0.7981
Pt    0.0364    0.2414    0.7616
Pt    0.0377    0.2408    0.7968
Pt    0.0738    0.0180    0.7630
Pt    0.0745    0.0154    0.8002
Pt    0.0771    0.0192    0.8700
Pt    0.0743    0.0538    0.7626
Pt    0.0751    0.0545    0.7995
Pt    0.0760    0.0561    0.8342
Pt    0.0762    0.0560    0.8690
Pt    0.0757    0.0938    0.7637
Pt    0.0747    0.0925    0.7993
Pt    0.0738    0.0944    0.8353
Pt    0.0742    0.1304    0.7613
Pt    0.0739    0.1301    0.7994
Pt    0.0748    0.1685    0.7615
Pt    0.0740    0.1676    0.7998
Pt    0.0755    0.2056    0.7627
Pt    0.0741    0.2059    0.7977
Pt    0.0764    0.2429    0.7611
Pt    0.1126    0.0179    0.7640
Pt    0.1108    0.0180    0.8008
Pt    0.1111    0.0557    0.7621
Pt    0.1109    0.0568    0.7984
Pt    0.1122    0.0933    0.7625
Pt    0.1122    0.0929    0.8007
Pt    0.1110    0.1306    0.7618
Pt    0.1094    0.1311    0.7996
Pt    0.1107    0.1671    0.7628
Pt    0.1123    0.1671    0.7999
Pt    0.1128    0.2053    0.7618
Pt    0.1120    0.2431    0.7613
Pt    0.1494    0.0185    0.7630
Pt    0.1492    0.0559    0.7628
Pt    0.1487    0.0549    0.8003
Pt    0.1481    0.0929    0.7628
Pt    0.1488    0.0933    0.8005
Pt    0.1504    0.1294    0.7626
Pt    0.1507    0.1285    0.7997
Pt    0.1505    0.1669    0.7607
Pt    0.1498    0.1671    0.7990
Pt    0.1496    0.1685    0.8352
Pt    0.1504    0.2049    0.7615
Pt    0.1500    0.2057    0.7978
Pt    0.1487    0.2046    0.8330
Pt    0.1497    0.2408    0.7614
Pt    0.1847    0.0188    0.7631
Pt    0.1851    0.0566    0.7630
Pt    0.1865    0.0927    0.7637
Pt    0.1864    0.0926    0.7999
Pt    0.1875    0.1296    0.7617
Pt    0.1871    0.1302    0.7987
Pt    0.1874    0.1666    0.7620
Pt    0.1873    0.1668    0.7976
Pt    0.1864    0.1666    0.8348
Pt    0.1855    0.1667    0.8720
Pt    0.1880    0.2050    0.7612
Pt    0.1885    0.2058    0.7980
Pt    0.1881    0.2056    0.8330
Pt    0.1871    0.2069    0.8709
Pt    0.1877    0.2437    0.7633
Pt    0.1877    0.2407    0.7976
Pt    0.1859    0.2427    0.8702
Pt    0.2229    0.0204    0.7609
Pt    0.2203    0.0192    0.7991
Pt    0.2230    0.0570    0.7632
Pt    0.2223    0.0561    0.7981
Pt    0.2249    0.0947    0.7629
Pt    0.2263    0.1296    0.7629
Pt    0.2259    0.1318    0.7983
Pt    0.2255    0.1665    0.7617
Pt    0.2245    0.1669    0.7985
Pt    0.2228    0.1667    0.8343
Pt    0.2263    0.1642    0.8703
Pt    0.2261    0.2058    0.7625
Pt    0.2264    0.2046    0.7972
Pt    0.2240    0.2034    0.8332
Pt    0.2241    0.2061    0.8701
Pt    0.2245    0.2434    0.8696
Pt    0.2056    0.1666    0.8547
Pt    0.0188    0.0366    0.7639
Pt    0.0178    0.0355    0.8339
Pt    0.0186    0.0371    0.8689
Pt    0.0178    0.0737    0.7624
Pt    0.0187    0.0732    0.7994
Pt    0.0182    0.0761    0.8686
Pt    0.0170    0.1120    0.7616
Pt    0.0186    0.1105    0.8000
Pt    0.0166    0.1498    0.7624
Pt    0.0184    0.1861    0.7613
Pt    0.0181    0.2236    0.7606
Pt    0.0189    0.2221    0.7975
Pt    0.2049    0.1670    0.8167
Pt    0.0552    0.0357    0.7629
Pt    0.0555    0.0359    0.7997
Pt    0.0552    0.0374    0.8341
Pt    0.0579    0.0373    0.8696
Pt    0.0569    0.0748    0.7637
Pt    0.0551    0.0743    0.7979
Pt    0.0554    0.0765    0.8355
Pt    0.0547    0.0760    0.8683
Pt    0.0555    0.1124    0.7629
Pt    0.0546    0.1120    0.7998
Pt    0.0553    0.1500    0.7629
Pt    0.0553    0.1480    0.8001
Pt    0.0560    0.1860    0.7623
Pt    0.0564    0.2231    0.7626
Pt    0.0545    0.2228    0.7978
Pt    0.2069    0.1677    0.7785
Pt    0.0922    0.0359    0.7622
Pt    0.0930    0.0364    0.7987
Pt    0.0955    0.0385    0.8364
Pt    0.0929    0.0737    0.7620
Pt    0.0941    0.0742    0.8004
Pt    0.0937    0.0757    0.8347
Pt    0.0934    0.1130    0.7624
Pt    0.0922    0.1116    0.7995
Pt    0.0922    0.1482    0.7625
Pt    0.0930    0.1503    0.7995
Pt    0.0932    0.1864    0.7635
Pt    0.0915    0.1871    0.7994
Pt    0.0949    0.2244    0.7614
Pt    0.2067    0.1319    0.8175
Pt    0.1299    0.0372    0.7618
Pt    0.1291    0.0384    0.7969
Pt    0.1300    0.0755    0.7627
Pt    0.1308    0.0740    0.7997
Pt    0.1312    0.1116    0.7622
Pt    0.1282    0.1134    0.8005
Pt    0.1314    0.1489    0.7626
Pt    0.1325    0.1453    0.8009
Pt    0.1312    0.1863    0.7623
Pt    0.1309    0.1849    0.7980
Pt    0.1315    0.2235    0.7614
Pt    0.1317    0.2262    0.7983
Pt    0.1680    0.0378    0.7630
Pt    0.1677    0.0742    0.7621
Pt    0.1667    0.0746    0.8006
Pt    0.1679    0.1110    0.7608
Pt    0.1686    0.1112    0.7984
Pt    0.1686    0.1489    0.7610
Pt    0.1674    0.1484    0.7974
Pt    0.1699    0.1467    0.8351
Pt    0.1698    0.1868    0.7602
Pt    0.1690    0.1852    0.7985
Pt    0.1666    0.1862    0.8342
Pt    0.1689    0.1861    0.8723
Pt    0.1683    0.2245    0.7624
Pt    0.1673    0.2253    0.7983
Pt    0.1676    0.2232    0.8345
Pt    0.1661    0.2221    0.8724
Pt    0.2067    0.1296    0.7812
Pt    0.2054    0.0930    0.7825
Pt    0.2036    0.0381    0.7621
Pt    0.2043    0.0387    0.7996
Pt    0.2063    0.0749    0.7618
Pt    0.2051    0.0746    0.7992
Pt    0.2068    0.1107    0.7629
Pt    0.2072    0.1473    0.7619
Pt    0.2060    0.1479    0.7996
Pt    0.2056    0.1485    0.8367
Pt    0.2070    0.1871    0.7618
Pt    0.2062    0.1849    0.7977
Pt    0.2062    0.1859    0.8342
Pt    0.2047    0.1873    0.8712
Pt    0.2058    0.2240    0.7620
Pt    0.2082    0.2241    0.7956
Pt    0.2052    0.2235    0.8344
Pt    0.2066    0.2245    0.8698
Pt    0.2041    0.0564    0.7806
Pt    0.1661    0.2430    0.7808
Pt    0.1691    0.2052    0.7796
Pt    0.2412    0.0386    0.7616
Pt    0.2403    0.0359    0.7991
Pt    0.2440    0.0758    0.7638
Pt    0.2437    0.1112    0.7629
Pt    0.2440    0.1482    0.7616
Pt    0.2426    0.1872    0.7620
Pt    0.2435    0.1870    0.7982
Pt    0.2438    0.1860    0.8696
Pt    0.2422    0.2246    0.8679
Pt    0.0184    0.0176    0.8512
Pt    0.0186    0.0555    0.7802
Pt    0.0191    0.0561    0.8160
Pt    0.0177    0.0573    0.8498
Pt    0.0168    0.0941    0.7816
Pt    0.0188    0.0929    0.8167
Pt    0.0177    0.1312    0.7813
Pt    0.0178    0.2031    0.7802
Pt    0.0188    0.2410    0.7799
Pt    0.0556    0.0170    0.7821
Pt    0.0557    0.0170    0.8162
Pt    0.0597    0.0172    0.8502
Pt    0.0563    0.0548    0.7810
Pt    0.0554    0.0560    0.8167
Pt    0.0567    0.0554    0.8517
Pt    0.0561    0.0941    0.7814
Pt    0.0553    0.0926    0.8167
Pt    0.0564    0.1313    0.7802
Pt    0.0554    0.1687    0.7826
Pt    0.0556    0.2044    0.7805
Pt    0.0570    0.2418    0.7801
Pt    0.0936    0.0156    0.7814
Pt    0.0953    0.0223    0.8178
Pt    0.0935    0.0552    0.7802
Pt    0.0938    0.0552    0.8172
Pt    0.0932    0.0934    0.7814
Pt    0.0933    0.0940    0.8166
Pt    0.0925    0.1305    0.7811
Pt    0.0928    0.1688    0.7812
Pt    0.0941    0.2063    0.7817
Pt    0.1296    0.0180    0.7819
Pt    0.1297    0.0573    0.7804
Pt    0.1294    0.0937    0.7819
Pt    0.1302    0.1303    0.7817
Pt    0.1314    0.1686    0.7799
Pt    0.1313    0.1654    0.8158
Pt    0.1312    0.2043    0.7817
Pt    0.1309    0.2057    0.8151
Pt    0.1314    0.2434    0.7797
Pt    0.1681    0.0560    0.7827
Pt    0.1676    0.0919    0.7814
Pt    0.1682    0.1286    0.7801
Pt    0.1699    0.1280    0.8177
Pt    0.1675    0.1675    0.7790
Pt    0.1677    0.1667    0.8162
Pt    0.1670    0.1681    0.8521
Pt    0.0025    0.2416    0.8727
Pt    0.2419    0.0019    0.7982
Pt    0.0015    0.2407    0.7984
Pt    0.2232    0.0017    0.7789
Pt    0.2043    0.0017    0.7622
Pt    0.2029    0.0014    0.7962
Pt    0.0392    0.0015    0.8529
Pt    0.2421    0.2423    0.9629
Pt    0.2425    0.2414    0.9253
Pt    0.2436    0.2421    0.8892
Pt    0.2408    0.2039    0.9637
Pt    0.2426    0.2042    0.9260
Pt    0.2426    0.2050    0.8876
Pt    0.2403    0.1677    0.9621
Pt    0.2407    0.1676    0.9261
Pt    0.1124    0.1472    0.0010
Pt    0.0013    0.0584    0.9807
Pt    0.0014    0.0385    0.9621
Pt    0.2443    0.1661    0.8877
Pt    0.0560    0.1317    0.9998
Pt    0.2036    0.2034    0.9643
Pt    0.2041    0.2048    0.9252
Pt    0.2056    0.2048    0.8897
Pt    0.0389    0.0389    0.8879
Pt    0.0383    0.0378    0.9258
Pt    0.0376    0.0383    0.9627
Pt    0.0378    0.0763    0.8874
Pt    0.0385    0.0756    0.9244
Pt    0.0387    0.0756    0.9621
Pt    0.0393    0.1143    0.9215
Pt    0.0385    0.1123    0.9630
Pt    0.2025    0.1669    0.9635
Pt    0.2022    0.1661    0.9256
Pt    0.0574    0.0574    0.9999
Pt    0.0770    0.0388    0.8881
Pt    0.0761    0.0381    0.9256
Pt    0.0763    0.0388    0.9622
Pt    0.0738    0.0747    0.8879
Pt    0.0751    0.0754    0.9253
Pt    0.0746    0.0757    0.9621
Pt    0.0757    0.1129    0.9634
Pt    0.0564    0.0199    0.0009
Pt    0.0028    0.2226    0.9251
Pt    0.1139    0.0374    0.9263
Pt    0.1127    0.0389    0.9632
Pt    0.1123    0.0734    0.9628
Pt    0.1119    0.1127    0.9620
Pt    0.1118    0.1483    0.9646
Pt    0.2052    0.1660    0.8892
Pt    0.1497    0.1119    0.9632
Pt    0.1484    0.1491    0.9642
Pt    0.1477    0.1864    0.9261
Pt    0.1475    0.1853    0.9638
Pt    0.1477    0.2232    0.9271
Pt    0.1460    0.2236    0.9622
Pt    0.1853    0.1478    0.9267
Pt    0.1858    0.1484    0.9649
Pt    0.1874    0.1836    0.8899
Pt    0.1849    0.1840    0.9260
Pt    0.1849    0.1853    0.9622
Pt    0.1870    0.2238    0.8890
Pt    0.1852    0.2224    0.9251
Pt    0.1867    0.2230    0.9632
Pt    0.0203    0.1320    0.0001
Pt    0.2214    0.1489    0.9285
Pt    0.2215    0.1481    0.9634
Pt    0.2237    0.1842    0.8859
Pt    0.2228    0.1852    0.9263
Pt    0.2216    0.1853    0.9628
Pt    0.2242    0.2234    0.8878
Pt    0.2237    0.2235    0.9249
Pt    0.2236    0.2230    0.9618
Pt    0.2404    0.1282    0.9626
Pt    0.0015    0.1310    0.9436
Pt    0.2406    0.1320    0.9269
Pt    0.2400    0.0218    0.9264
Pt    0.2037    0.2424    0.9634
Pt    0.2050    0.2419    0.9255
Pt    0.2061    0.2427    0.8886
Pt    0.2234    0.0015    0.9277
Pt    0.0016    0.0962    0.9813
Pt    0.0041    0.2408    0.9084
Pt    0.0020    0.0560    0.9062
Pt    0.0401    0.0013    0.9626
Pt    0.0379    0.0196    0.9082
Pt    0.0384    0.0192    0.9440
Pt    0.0381    0.0201    0.9814
Pt    0.0380    0.0574    0.9076
Pt    0.0381    0.0573    0.9444
Pt    0.0386    0.0574    0.9806
Pt    0.0378    0.0963    0.9051
Pt    0.0381    0.0947    0.9431
Pt    0.0369    0.0951    0.9811
Pt    0.0586    0.1101    0.9050
Pt    0.0398    0.1292    0.9423
Pt    0.0380    0.1332    0.9810
Pt    0.0768    0.0196    0.9068
Pt    0.0769    0.0206    0.9434
Pt    0.0766    0.0193    0.9823
Pt    0.0751    0.0571    0.9059
Pt    0.0750    0.0561    0.9429
Pt    0.0755    0.0561    0.9819
Pt    0.0762    0.0926    0.9067
Pt    0.0758    0.0938    0.9422
Pt    0.0766    0.0938    0.9822
Pt    0.0748    0.1310    0.9827
Pt    0.1124    0.0212    0.9060
Pt    0.1137    0.0190    0.9449
Pt    0.1140    0.0191    0.9817
Pt    0.1098    0.0768    0.9270
Pt    0.1129    0.0567    0.9438
Pt    0.1117    0.0558    0.9815
Pt    0.1109    0.0958    0.9446
Pt    0.1114    0.0929    0.9814
Pt    0.1110    0.1318    0.9452
Pt    0.1117    0.1293    0.9825
Pt    0.1112    0.1675    0.9841
Pt    0.0765    0.0379    0.0005
Pt    0.1489    0.0937    0.9814
Pt    0.1491    0.1311    0.9452
Pt    0.1490    0.1298    0.9828
Pt    0.1486    0.1686    0.9450
Pt    0.1476    0.1672    0.9840
Pt    0.1477    0.2051    0.9072
Pt    0.1464    0.2031    0.9452
Pt    0.1466    0.2048    0.9824
Pt    0.1483    0.2403    0.9074
Pt    0.1462    0.2425    0.9454
Pt    0.1484    0.2408    0.9816
Pt    0.1860    0.1287    0.9817
Pt    0.1828    0.1659    0.9081
Pt    0.1844    0.1669    0.9441
Pt    0.1846    0.1672    0.9823
Pt    0.1849    0.2038    0.9065
Pt    0.1849    0.2047    0.9444
Pt    0.1836    0.2035    0.9827
Pt    0.1849    0.2413    0.9079
Pt    0.1844    0.2418    0.9443
Pt    0.1856    0.2418    0.9819
Pt    0.2228    0.1341    0.9096
Pt    0.2216    0.1293    0.9435
Pt    0.2211    0.1296    0.9821
Pt    0.2234    0.1659    0.9074
Pt    0.2202    0.1669    0.9453
Pt    0.2203    0.1672    0.9810
Pt    0.2225    0.2037    0.9084
Pt    0.2214    0.2047    0.9443
Pt    0.2217    0.2037    0.9812
Pt    0.2245    0.2420    0.9063
Pt    0.2227    0.2419    0.9438
Pt    0.2232    0.2406    0.9812
Pt    0.2050    0.1289    0.9629
Pt    0.0019    0.0953    0.9067
Pt    0.2040    0.1303    0.9264
Pt    0.0201    0.0375    0.9064
Pt    0.0188    0.0368    0.9448
Pt    0.0200    0.0390    0.9810
Pt    0.0195    0.0758    0.9064
Pt    0.0199    0.0760    0.9447
Pt    0.0193    0.0775    0.9818
Pt    0.0189    0.1140    0.9045
Pt    0.0204    0.1142    0.9423
Pt    0.0195    0.1146    0.9805
Pt    0.1663    0.2414    0.9628
Pt    0.1653    0.2400    0.9272
Pt    0.1672    0.2410    0.8886
Pt    0.0571    0.0378    0.9047
Pt    0.0565    0.0375    0.9433
Pt    0.0573    0.0374    0.9813
Pt    0.0558    0.0766    0.9050
Pt    0.0565    0.0748    0.9434
Pt    0.0559    0.0770    0.9806
Pt    0.0747    0.1110    0.9253
Pt    0.0578    0.1120    0.9424
Pt    0.0555    0.1132    0.9823
Pt    0.1658    0.2055    0.9631
Pt    0.0013    0.1126    0.9622
Pt    0.1273    0.2037    0.9999
Pt    0.0936    0.0393    0.9054
Pt    0.0958    0.0377    0.9433
Pt    0.0940    0.0369    0.9819
Pt    0.0941    0.0755    0.9070
Pt    0.0934    0.0748    0.9451
Pt    0.0939    0.0749    0.9804
Pt    0.0919    0.1140    0.9439
Pt    0.0935    0.1124    0.9816
Pt    0.0939    0.1485    0.9834
Pt    0.0206    0.0571    0.0007
Pt    0.2211    0.1856    0.0007
Pt    0.1105    0.0572    0.9076
Pt    0.1319    0.0387    0.9465
Pt    0.1318    0.0372    0.9832
Pt    0.1301    0.0747    0.9823
Pt    0.1315    0.1118    0.9456
Pt    0.1299    0.1107    0.9830
Pt    0.1302    0.1496    0.9459
Pt    0.1316    0.1469    0.9830
Pt    0.1289    0.1858    0.9825
Pt    0.1284    0.2245    0.9089
Pt    0.1285    0.2219    0.9435
Pt    0.1289    0.2226    0.9818
Pt    0.1670    0.1124    0.9826
Pt    0.1663    0.1491    0.9466
Pt    0.1674    0.1477    0.9833
Pt    0.1671    0.1853    0.9077
Pt    0.1661    0.1875    0.9446
Pt    0.1657    0.1858    0.9818
Pt    0.1660    0.2218    0.9072
Pt    0.1656    0.2216    0.9443
Pt    0.1663    0.2238    0.9817
Pt    0.2026    0.1497    0.9075
Pt    0.2018    0.1469    0.9453
Pt    0.2030    0.1484    0.9824
Pt    0.2050    0.1859    0.9075
Pt    0.2040    0.1869    0.9436
Pt    0.2019    0.1858    0.9814
Pt    0.2038    0.2235    0.9073
Pt    0.2038    0.2233    0.9447
Pt    0.2041    0.2224    0.9829
Pt    0.2386    0.0026    0.9076
Pt    0.2397    0.1117    0.9820
Pt    0.2421    0.1493    0.9073
Pt    0.2404    0.1499    0.9445
Pt    0.2402    0.1483    0.9810
Pt    0.2411    0.1855    0.9063
Pt    0.2415    0.1858    0.9445
Pt    0.2420    0.1833    0.9820
Pt    0.2430    0.2228    0.9063
Pt    0.2426    0.2232    0.9440
Pt    0.2413    0.2222    0.9813
Pt    0.0199    0.0203    0.8878
Pt    0.0193    0.0189    0.9255
Pt    0.0195    0.0188    0.9626
Pt    0.0204    0.0566    0.8874
Pt    0.0187    0.0568    0.9256
Pt    0.0196    0.0572    0.9618
Pt    0.0191    0.0939    0.8875
Pt    0.0203    0.0971    0.9240
Pt    0.0189    0.0942    0.9631
Pt    0.0209    0.1320    0.9619
Pt    0.0201    0.2414    0.9279
Pt    0.0590    0.0194    0.8885
Pt    0.0584    0.0196    0.9251
Pt    0.0570    0.0206    0.9631
Pt    0.0562    0.0572    0.8874
Pt    0.0570    0.0565    0.9237
Pt    0.0579    0.0560    0.9623
Pt    0.0569    0.0932    0.9245
Pt    0.0578    0.0939    0.9619
Pt    0.0572    0.1294    0.9615
Pt    0.0936    0.0198    0.8886
Pt    0.0950    0.0201    0.9247
Pt    0.0959    0.0198    0.9621
Pt    0.0928    0.0562    0.9252
Pt    0.0934    0.0568    0.9617
Pt    0.0931    0.0942    0.9623
Pt    0.0929    0.1311    0.9634
Pt    0.1323    0.0198    0.9637
Pt    0.1312    0.0567    0.9642
Pt    0.1306    0.0929    0.9616
Pt    0.1305    0.1309    0.9291
Pt    0.1306    0.1290    0.9644
Pt    0.1289    0.1666    0.9653
Pt    0.1309    0.2048    0.9248
Pt    0.1280    0.2032    0.9639
Pt    0.1275    0.2416    0.9268
Pt    0.1267    0.2396    0.9644
Pt    0.1684    0.1287    0.9621
Pt    0.1650    0.1657    0.9259
Pt    0.1669    0.1669    0.9629
Pt    0.1657    0.2044    0.8893
Pt    0.1673    0.2040    0.9260
Pt    0.1153    0.0036    0.9237
Pt    0.2417    0.2404    0.0008
Pt    0.0014    0.1145    0.9233
Pt    0.1103    0.2248    0.9986
Pt    0.1123    0.0389    0.0006
Pt    0.0019    0.1327    0.9814
Pt    0.0578    0.0013    0.9436
Pt    0.0561    0.0945    0.0006
Pt    0.0752    0.0761    0.9995
Pt    0.0369    0.1140    0.0008
Pt    0.0198    0.0948    0.0001
Pt    0.0382    0.0743    0.0005
Pt    0.1073    0.2500    0.9895
Pt    0.0384    0.0391    0.0006
Pt    0.0012    0.0767    0.9237
Pt    0.1847    0.2223    0.0007
Pt    0.0193    0.0193    0.9994
Pt    0.1122    0.0749    0.0009
Pt    0.0023    0.0942    0.9422
Pt    0.1314    0.0182    0.0008
Pt    0.2025    0.2039    0.0001
Pt    0.1290    0.1662    0.0010
Pt    0.1292    0.2417    0.0010
Pt    0.2228    0.1119    0.0002
Pt    0.2224    0.1471    0.9996
Pt    0.2412    0.2031    0.0001
Pt    0.1502    0.1113    0.0010
Pt    0.1665    0.2040    0.0011
Pt    0.0745    0.1118    0.0011
Pt    0.0939    0.0930    0.0008
Pt    0.1318    0.0930    0.0010
Pt    0.1305    0.0578    0.0005
Pt    0.2034    0.1671    0.0011
Pt    0.1103    0.2958    0.0030
Pt    0.1298    0.4984    0.0366
Pt    0.1501    0.4980    0.0169
Pt    0.0028    0.3728    0.0042
Pt    0.0187    0.4996    0.1131
Pt    0.0928    0.4989    0.1114
Pt    0.2431    0.4626    0.0738
Pt    0.0370    0.2612    0.1102
Pt    0.0571    0.4987    0.0379
Pt    0.0391    0.4811    0.0384
Pt    0.0368    0.4801    0.0764
Pt    0.0361    0.4800    0.1110
Pt    0.0747    0.2603    0.1101
Pt    0.0742    0.4799    0.0364
Pt    0.0753    0.4797    0.0735
Pt    0.0767    0.4800    0.1124
Pt    0.1102    0.2628    0.0349
Pt    0.1111    0.2608    0.0746
Pt    0.1109    0.2608    0.1102
Pt    0.0385    0.5000    0.0555
Pt    0.1125    0.2981    0.1096
Pt    0.1136    0.4438    0.1112
Pt    0.1110    0.4789    0.0361
Pt    0.1116    0.4812    0.0750
Pt    0.1104    0.4806    0.1116
Pt    0.2447    0.5008    0.0729
Pt    0.1478    0.2600    0.0374
Pt    0.1478    0.2606    0.0748
Pt    0.1498    0.2615    0.1103
Pt    0.2261    0.4996    0.0185
Pt    0.1481    0.2978    0.0375
Pt    0.1474    0.2975    0.0730
Pt    0.1482    0.2972    0.1105
Pt    0.0556    0.4995    0.1126
Pt    0.1490    0.3359    0.0379
Pt    0.1495    0.4428    0.0379
Pt    0.1507    0.4445    0.0750
Pt    0.1478    0.4434    0.1117
Pt    0.1117    0.5003    0.0926
Pt    0.1491    0.4804    0.0353
Pt    0.1500    0.4803    0.0741
Pt    0.1489    0.4825    0.1119
Pt    0.1692    0.5008    0.1112
Pt    0.1852    0.2602    0.0389
Pt    0.1849    0.2603    0.0749
Pt    0.1849    0.2591    0.1116
Pt    0.2063    0.5000    0.0740
Pt    0.1862    0.2992    0.0377
Pt    0.1869    0.2988    0.0739
Pt    0.1846    0.2979    0.1141
Pt    0.0383    0.5004    0.0199
Pt    0.1850    0.3365    0.0393
Pt    0.1847    0.3337    0.0756
Pt    0.1867    0.5002    0.0941
Pt    0.1865    0.3711    0.0384
Pt    0.1864    0.3706    0.0750
Pt    0.1880    0.4073    0.0371
Pt    0.1878    0.4073    0.0761
Pt    0.1874    0.4448    0.0368
Pt    0.1877    0.4447    0.0746
Pt    0.1857    0.4434    0.1126
Pt    0.1865    0.4805    0.0349
Pt    0.1875    0.4811    0.0741
Pt    0.1879    0.4822    0.1130
Pt    0.2235    0.4994    0.0539
Pt    0.2245    0.2586    0.0377
Pt    0.2216    0.2593    0.0758
Pt    0.2224    0.2590    0.1111
Pt    0.1859    0.4983    0.0164
Pt    0.2244    0.2970    0.0379
Pt    0.2224    0.2966    0.0757
Pt    0.2223    0.2960    0.1122
Pt    0.0174    0.4996    0.0759
Pt    0.2244    0.3349    0.0388
Pt    0.2244    0.3347    0.0756
Pt    0.2225    0.3334    0.1135
Pt    0.1310    0.4983    0.0743
Pt    0.2244    0.3726    0.0380
Pt    0.2263    0.3715    0.0763
Pt    0.2250    0.4060    0.0388
Pt    0.2248    0.4079    0.0770
Pt    0.2254    0.4443    0.0371
Pt    0.2238    0.4428    0.0749
Pt    0.2245    0.4446    0.1122
Pt    0.2256    0.4799    0.0369
Pt    0.2240    0.4823    0.0733
Pt    0.2263    0.4832    0.1101
Pt    0.0023    0.4453    0.0021
Pt    0.0751    0.4981    0.0563
Pt    0.0358    0.4646    0.0200
Pt    0.0376    0.4631    0.0573
Pt    0.0745    0.4616    0.0567
Pt    0.0739    0.4604    0.0940
Pt    0.1078    0.2686    0.0087
Pt    0.1101    0.2796    0.0920
Pt    0.1118    0.4617    0.0555
Pt    0.1131    0.4628    0.0933
Pt    0.1477    0.2788    0.0191
Pt    0.1469    0.2792    0.0555
Pt    0.1470    0.2791    0.0919
Pt    0.1499    0.3154    0.0186
Pt    0.1486    0.3163    0.0563
Pt    0.1475    0.3156    0.0923
Pt    0.1486    0.3519    0.0189
Pt    0.1504    0.4247    0.0571
Pt    0.1499    0.4257    0.0927
Pt    0.1490    0.4598    0.0186
Pt    0.1507    0.4622    0.0557
Pt    0.1502    0.4624    0.0942
Pt    0.1873    0.2785    0.0204
Pt    0.1860    0.2792    0.0550
Pt    0.1851    0.2793    0.0934
Pt    0.1855    0.3171    0.0196
Pt    0.1856    0.3181    0.0561
Pt    0.1847    0.3159    0.0949
Pt    0.1853    0.3529    0.0197
Pt    0.1852    0.3527    0.0570
Pt    0.1870    0.3523    0.0928
Pt    0.1873    0.3897    0.0188
Pt    0.1877    0.3896    0.0576
Pt    0.1877    0.4249    0.0196
Pt    0.1869    0.4247    0.0550
Pt    0.1870    0.4259    0.0941
Pt    0.1876    0.4627    0.0175
Pt    0.1877    0.4618    0.0562
Pt    0.1881    0.4637    0.0948
Pt    0.2239    0.2775    0.0214
Pt    0.2231    0.2790    0.0561
Pt    0.2222    0.2779    0.0928
Pt    0.2242    0.3168    0.0196
Pt    0.2240    0.3164    0.0576
Pt    0.2228    0.3157    0.0937
Pt    0.2240    0.3526    0.0206
Pt    0.2265    0.3541    0.0573
Pt    0.2236    0.3519    0.0948
Pt    0.2246    0.3896    0.0183
Pt    0.2254    0.3893    0.0582
Pt    0.2053    0.3707    0.0954
Pt    0.2250    0.4240    0.0214
Pt    0.2262    0.4243    0.0581
Pt    0.2242    0.4262    0.0942
Pt    0.2229    0.4613    0.0560
Pt    0.2251    0.4628    0.0924
Pt    0.0198    0.4824    0.0206
Pt    0.0190    0.4823    0.0566
Pt    0.0178    0.4815    0.0945
Pt    0.0568    0.4803    0.0195
Pt    0.0561    0.4802    0.0567
Pt    0.0568    0.4809    0.0933
Pt    0.0918    0.2614    0.0921
Pt    0.0940    0.4454    0.0937
Pt    0.0929    0.4823    0.0186
Pt    0.0940    0.4794    0.0552
Pt    0.0923    0.4791    0.0931
Pt    0.1297    0.2613    0.0181
Pt    0.1293    0.2593    0.0557
Pt    0.1288    0.2601    0.0933
Pt    0.1288    0.2967    0.0201
Pt    0.1287    0.2977    0.0548
Pt    0.1305    0.2972    0.0917
Pt    0.1314    0.3334    0.0184
Pt    0.1330    0.4434    0.0553
Pt    0.1313    0.4439    0.0920
Pt    0.1302    0.4798    0.0180
Pt    0.1302    0.4803    0.0556
Pt    0.1314    0.4808    0.0925
Pt    0.1667    0.2600    0.0186
Pt    0.1663    0.2600    0.0562
Pt    0.1675    0.2602    0.0927
Pt    0.1675    0.2978    0.0195
Pt    0.1687    0.2978    0.0556
Pt    0.1668    0.2976    0.0932
Pt    0.1675    0.3347    0.0197
Pt    0.1642    0.3361    0.0586
Pt    0.1670    0.3720    0.0197
Pt    0.1680    0.3713    0.0571
Pt    0.1685    0.4072    0.0575
Pt    0.1692    0.4087    0.0950
Pt    0.1680    0.4421    0.0199
Pt    0.1695    0.4427    0.0553
Pt    0.1682    0.4433    0.0954
Pt    0.1669    0.4780    0.0171
Pt    0.1683    0.4801    0.0555
Pt    0.1693    0.4808    0.0926
Pt    0.2047    0.2581    0.0185
Pt    0.2041    0.2594    0.0566
Pt    0.2025    0.2599    0.0939
Pt    0.2055    0.2979    0.0208
Pt    0.2047    0.2990    0.0560
Pt    0.2036    0.2972    0.0940
Pt    0.2048    0.3340    0.0189
Pt    0.2051    0.3358    0.0580
Pt    0.2051    0.3336    0.0945
Pt    0.2052    0.3707    0.0191
Pt    0.2060    0.3709    0.0568
Pt    0.2065    0.4069    0.0191
Pt    0.2065    0.4069    0.0572
Pt    0.2053    0.4078    0.0938
Pt    0.2050    0.4419    0.0195
Pt    0.2060    0.4432    0.0556
Pt    0.2057    0.4453    0.0940
Pt    0.2075    0.4815    0.0178
Pt    0.2047    0.4798    0.0539
Pt    0.2060    0.4823    0.0931
Pt    0.2438    0.2601    0.0190
Pt    0.2411    0.2595    0.0575
Pt    0.2402    0.2577    0.0940
Pt    0.2418    0.2974    0.0188
Pt    0.2428    0.2961    0.0568
Pt    0.2410    0.2949    0.0940
Pt    0.2433    0.3337    0.0207
Pt    0.2430    0.3343    0.0578
Pt    0.2421    0.3325    0.0948
Pt    0.2440    0.3722    0.0192
Pt    0.2438    0.3725    0.0577
Pt    0.2433    0.3693    0.0959
Pt    0.2416    0.4443    0.0553
Pt    0.2425    0.4812    0.0559
Pt    0.2433    0.4809    0.0908
Pt    0.0176    0.2807    0.1106
Pt    0.2456    0.5007    0.0362
Pt    0.0748    0.5000    0.0919
Pt    0.0186    0.4636    0.0385
Pt    0.0563    0.4615    0.0372
Pt    0.0564    0.4629    0.0758
Pt    0.0556    0.4640    0.1135
Pt    0.0933    0.2804    0.1104
Pt    0.0939    0.4618    0.0741
Pt    0.0933    0.4609    0.1135
Pt    0.0919    0.5009    0.0375
Pt    0.1291    0.2786    0.0376
Pt    0.1278    0.2794    0.0727
Pt    0.1296    0.2786    0.1111
Pt    0.0549    0.4999    0.0746
Pt    0.1324    0.3169    0.0371
Pt    0.1310    0.3148    0.1104
Pt    0.1314    0.4619    0.0374
Pt    0.1315    0.4618    0.0744
Pt    0.1315    0.4634    0.1125
Pt    0.2052    0.3521    0.1133
Pt    0.1667    0.2794    0.0377
Pt    0.1670    0.2791    0.0739
Pt    0.1681    0.2787    0.1115
Pt    0.1503    0.4993    0.0929
Pt    0.1673    0.3164    0.0389
Pt    0.1668    0.3162    0.0744
Pt    0.2252    0.4989    0.0913
Pt    0.1659    0.3536    0.0377
Pt    0.1676    0.3525    0.0760
Pt    0.1689    0.3904    0.0378
Pt    0.1710    0.3894    0.0774
Pt    0.1675    0.4233    0.0367
Pt    0.1687    0.4259    0.0750
Pt    0.1663    0.4245    0.1140
Pt    0.1675    0.4616    0.0370
Pt    0.1694    0.4616    0.0747
Pt    0.1683    0.4628    0.1123
Pt    0.0939    0.4989    0.0741
Pt    0.2057    0.2770    0.0376
Pt    0.2031    0.2789    0.0742
Pt    0.2031    0.2781    0.1117
Pt    0.1689    0.4994    0.0359
Pt    0.2040    0.3177    0.0386
Pt    0.2050    0.3170    0.0747
Pt    0.2040    0.3146    0.1133
Pt    0.1111    0.4993    0.0553
Pt    0.2042    0.3534    0.0392
Pt    0.2056    0.3528    0.0764
Pt    0.0040    0.3324    0.0046
Pt    0.2061    0.3896    0.0383
Pt    0.2060    0.3885    0.0770
Pt    0.2068    0.4247    0.0386
Pt    0.2046    0.4259    0.0753
Pt    0.2053    0.4265    0.1117
Pt    0.2069    0.4626    0.0357
Pt    0.2051    0.4641    0.0749
Pt    0.2064    0.4646    0.1124
Pt    0.0367    0.4993    0.0944
Pt    0.2431    0.2775    0.0386
Pt    0.2418    0.2775    0.0758
Pt    0.2404    0.2769    0.1142
Pt    0.0195    0.5002    0.0383
Pt    0.2428    0.3147    0.0394
Pt    0.2412    0.3143    0.0759
Pt    0.2408    0.3148    0.1129
Pt    0.1687    0.4990    0.0741
Pt    0.2434    0.3539    0.0379
Pt    0.2446    0.3516    0.0778
Pt    0.2422    0.3505    0.1139
Pt    0.2431    0.3906    0.0386
Pt    0.2434    0.4251    0.0392
Pt    0.1869    0.4989    0.0550
Pt    0.1498    0.4990    0.0551
Pt    0.0038    0.2960    0.0035
Pt    0.1120    0.4983    0.0174
Pt    0.0745    0.4981    0.0178
Pt    0.2061    0.5003    0.1110
Pt    0.2444    0.5008    0.1115
Pt    0.0035    0.4636    0.0192
Pt    0.2051    0.2784    0.0025
Pt    0.1845    0.3719    0.0014
Pt    0.2071    0.4988    0.0350
Pt    0.0019    0.3522    0.0225
Pt    0.1289    0.4995    0.1109
Pt    0.2058    0.3152    0.0021
Pt    0.2224    0.3345    0.0016
Pt    0.0210    0.3540    0.0037
Pt    0.1851    0.2580    0.0013
Pt    0.2246    0.2582    0.0024
Pt    0.2240    0.3700    0.0019
Pt    0.1651    0.3529    0.0016
Pt    0.2042    0.3537    0.0014
Pt    0.1490    0.2972    0.0016
Pt    0.1300    0.2791    0.0015
Pt    0.2421    0.3514    0.0015
Pt    0.2237    0.2962    0.0013
Pt    0.1852    0.2967    0.0021
Pt    0.1283    0.3156    0.0021
Pt    0.2420    0.4615    0.2204
Pt    0.0554    0.4994    0.2245
Pt    0.2039    0.4627    0.2226
Pt    0.1494    0.5004    0.2430
Pt    0.2057    0.4594    0.1861
Pt    0.2243    0.4999    0.2044
Pt    0.2041    0.4619    0.1489
Pt    0.2231    0.5000    0.2416
Pt    0.1662    0.4609    0.1878
Pt    0.1680    0.4607    0.1507
Pt    0.2433    0.4990    0.1843
Pt    0.1685    0.2773    0.1476
Pt    0.0388    0.2609    0.1462
Pt    0.0379    0.2602    0.1859
Pt    0.0375    0.2603    0.2223
Pt    0.0389    0.2982    0.1473
Pt    0.0384    0.2999    0.1836
Pt    0.0371    0.2976    0.2230
Pt    0.0393    0.3360    0.1454
Pt    0.0383    0.3364    0.1848
Pt    0.0371    0.3354    0.2234
Pt    0.0398    0.3730    0.1856
Pt    0.0384    0.3734    0.2239
Pt    0.0383    0.4087    0.1863
Pt    0.0401    0.4077    0.2230
Pt    0.0363    0.4449    0.1485
Pt    0.0388    0.4452    0.1876
Pt    0.0397    0.4441    0.2254
Pt    0.0363    0.4809    0.1505
Pt    0.0368    0.4803    0.1882
Pt    0.0386    0.4805    0.2250
Pt    0.0741    0.2601    0.1469
Pt    0.0754    0.2608    0.1840
Pt    0.0749    0.2604    0.2206
Pt    0.0752    0.2984    0.1454
Pt    0.0747    0.2983    0.1837
Pt    0.0756    0.2986    0.2214
Pt    0.0764    0.3364    0.1843
Pt    0.0753    0.3346    0.2228
Pt    0.0756    0.3717    0.1856
Pt    0.0764    0.3722    0.2234
Pt    0.0776    0.4073    0.1872
Pt    0.0780    0.4072    0.2237
Pt    0.0755    0.4432    0.1496
Pt    0.0741    0.4448    0.1869
Pt    0.0776    0.4434    0.2253
Pt    0.0763    0.4808    0.1488
Pt    0.0762    0.4816    0.1874
Pt    0.0744    0.4816    0.2256
Pt    0.1116    0.2612    0.1477
Pt    0.1142    0.2593    0.1845
Pt    0.1134    0.2599    0.2208
Pt    0.1141    0.2987    0.1472
Pt    0.1125    0.2982    0.1834
Pt    0.1127    0.2965    0.2213
Pt    0.1130    0.3344    0.2208
Pt    0.1129    0.4421    0.1499
Pt    0.1127    0.4452    0.1865
Pt    0.1139    0.4461    0.2244
Pt    0.1127    0.4807    0.1493
Pt    0.1119    0.4816    0.1872
Pt    0.1127    0.4820    0.2246
Pt    0.1495    0.2584    0.1489
Pt    0.1509    0.2968    0.1467
Pt    0.1488    0.4441    0.1501
Pt    0.1489    0.4806    0.1493
Pt    0.1494    0.4809    0.1871
Pt    0.1505    0.4824    0.2246
Pt    0.1859    0.4800    0.1498
Pt    0.1874    0.4806    0.1852
Pt    0.1868    0.4809    0.2221
Pt    0.2249    0.4795    0.1474
Pt    0.2249    0.4783    0.1827
Pt    0.2233    0.4804    0.2226
Pt    0.1324    0.4640    0.2247
Pt    0.0933    0.3001    0.1273
Pt    0.1303    0.4621    0.1871
Pt    0.0930    0.5003    0.1860
Pt    0.0179    0.5004    0.1496
Pt    0.1307    0.4613    0.1496
Pt    0.0929    0.5007    0.1498
Pt    0.1132    0.3531    0.2044
Pt    0.0928    0.4980    0.2254
Pt    0.1303    0.3171    0.2211
Pt    0.0560    0.4999    0.1876
Pt    0.1321    0.2789    0.2214
Pt    0.0375    0.2794    0.1282
Pt    0.0380    0.2793    0.1649
Pt    0.0383    0.2785    0.2039
Pt    0.0380    0.2789    0.2409
Pt    0.0396    0.3172    0.1292
Pt    0.0394    0.3177    0.1646
Pt    0.0375    0.3169    0.2043
Pt    0.0382    0.3162    0.2412
Pt    0.0382    0.3547    0.1650
Pt    0.0398    0.3545    0.2045
Pt    0.0370    0.3542    0.2415
Pt    0.0378    0.3905    0.1686
Pt    0.0379    0.3914    0.2049
Pt    0.0398    0.3921    0.2425
Pt    0.0379    0.4262    0.1682
Pt    0.0390    0.4257    0.2057
Pt    0.0393    0.4237    0.2406
Pt    0.0364    0.4642    0.1301
Pt    0.0371    0.4639    0.1687
Pt    0.0374    0.4623    0.2067
Pt    0.0757    0.2802    0.1270
Pt    0.0764    0.2795    0.1650
Pt    0.0756    0.2799    0.2023
Pt    0.0758    0.2799    0.2402
Pt    0.0763    0.3190    0.1651
Pt    0.0749    0.3169    0.2033
Pt    0.0761    0.3164    0.2415
Pt    0.0759    0.3542    0.1667
Pt    0.0743    0.3545    0.2046
Pt    0.0763    0.3526    0.2418
Pt    0.0767    0.3923    0.1661
Pt    0.0769    0.3893    0.2052
Pt    0.0751    0.4243    0.1685
Pt    0.0759    0.4270    0.2057
Pt    0.0754    0.4612    0.1307
Pt    0.0759    0.4625    0.1687
Pt    0.0758    0.4630    0.2066
Pt    0.0755    0.4627    0.2439
Pt    0.1107    0.2801    0.1292
Pt    0.1115    0.2808    0.1661
Pt    0.1132    0.2783    0.2020
Pt    0.1130    0.2780    0.2403
Pt    0.1133    0.3146    0.1290
Pt    0.1122    0.3164    0.2019
Pt    0.1137    0.3149    0.2394
Pt    0.1132    0.3527    0.2397
Pt    0.1130    0.4258    0.1683
Pt    0.1151    0.4269    0.2038
Pt    0.1131    0.4615    0.1304
Pt    0.1127    0.4609    0.1675
Pt    0.1127    0.4636    0.2056
Pt    0.1511    0.2792    0.1292
Pt    0.1511    0.2783    0.1650
Pt    0.1490    0.4630    0.1310
Pt    0.1478    0.4623    0.1693
Pt    0.1500    0.4626    0.2083
Pt    0.1854    0.2774    0.1303
Pt    0.1852    0.4609    0.1315
Pt    0.1866    0.4605    0.1691
Pt    0.1867    0.4627    0.2026
Pt    0.2217    0.2749    0.1315
Pt    0.2229    0.3131    0.1307
Pt    0.0564    0.4985    0.1491
Pt    0.2253    0.4636    0.1283
Pt    0.2224    0.4615    0.2044
Pt    0.2229    0.4621    0.2401
Pt    0.0190    0.2610    0.1281
Pt    0.0203    0.2609    0.1663
Pt    0.0186    0.2611    0.2038
Pt    0.0182    0.2602    0.2419
Pt    0.0208    0.2983    0.1275
Pt    0.0197    0.2974    0.1647
Pt    0.0197    0.2982    0.2024
Pt    0.0194    0.2983    0.2415
Pt    0.0199    0.3339    0.1288
Pt    0.0199    0.3355    0.1642
Pt    0.0186    0.3373    0.2033
Pt    0.0194    0.3351    0.2425
Pt    0.0205    0.3730    0.1663
Pt    0.0213    0.3723    0.2049
Pt    0.0202    0.3746    0.2432
Pt    0.0190    0.4100    0.2050
Pt    0.0199    0.4453    0.1700
Pt    0.0203    0.4429    0.2047
Pt    0.0172    0.4816    0.1319
Pt    0.0181    0.4823    0.1693
Pt    0.0176    0.4796    0.2088
Pt    0.0561    0.2608    0.1269
Pt    0.0557    0.2600    0.1655
Pt    0.0566    0.2602    0.2025
Pt    0.0574    0.2604    0.2407
Pt    0.0566    0.2977    0.1272
Pt    0.0582    0.2978    0.1647
Pt    0.0564    0.2975    0.2030
Pt    0.0577    0.2980    0.2412
Pt    0.0575    0.3374    0.1644
Pt    0.0570    0.3360    0.2047
Pt    0.0569    0.3349    0.2418
Pt    0.0575    0.3726    0.1653
Pt    0.0568    0.3734    0.2056
Pt    0.0590    0.3731    0.2420
Pt    0.0572    0.4080    0.1679
Pt    0.0584    0.4088    0.2047
Pt    0.0556    0.4449    0.1312
Pt    0.0563    0.4442    0.1679
Pt    0.0573    0.4440    0.2074
Pt    0.0588    0.4437    0.2416
Pt    0.0565    0.4808    0.1316
Pt    0.0573    0.4809    0.1672
Pt    0.0568    0.4805    0.2060
Pt    0.0566    0.4818    0.2439
Pt    0.0929    0.2598    0.1287
Pt    0.0942    0.2599    0.1661
Pt    0.0944    0.2599    0.2030
Pt    0.0939    0.2608    0.2392
Pt    0.1677    0.4993    0.1478
Pt    0.0938    0.2997    0.1646
Pt    0.0945    0.2978    0.2032
Pt    0.0940    0.2981    0.2396
Pt    0.0932    0.3368    0.2031
Pt    0.0955    0.3329    0.2407
Pt    0.0954    0.3719    0.2400
Pt    0.0961    0.4075    0.1701
Pt    0.0963    0.4079    0.2044
Pt    0.0939    0.4422    0.1310
Pt    0.0939    0.4450    0.1685
Pt    0.0943    0.4439    0.2065
Pt    0.0941    0.4798    0.1314
Pt    0.0944    0.4819    0.1684
Pt    0.0936    0.4819    0.2064
Pt    0.0943    0.4816    0.2448
Pt    0.1313    0.2616    0.1286
Pt    0.1324    0.2609    0.1686
Pt    0.1323    0.2611    0.2024
Pt    0.1325    0.2601    0.2389
Pt    0.1319    0.2973    0.1291
Pt    0.1306    0.2978    0.2032
Pt    0.1317    0.2969    0.2393
Pt    0.1321    0.4428    0.1306
Pt    0.1318    0.4415    0.1703
Pt    0.1323    0.4452    0.2055
Pt    0.1311    0.4813    0.1311
Pt    0.1300    0.4809    0.1685
Pt    0.1321    0.4818    0.2052
Pt    0.1313    0.4816    0.2443
Pt    0.1674    0.2587    0.1307
Pt    0.1663    0.4430    0.1305
Pt    0.1673    0.4443    0.1697
Pt    0.1679    0.4808    0.1306
Pt    0.1673    0.4807    0.1690
Pt    0.1695    0.4805    0.2047
Pt    0.2036    0.2579    0.1292
Pt    0.2054    0.2945    0.1297
Pt    0.2059    0.4450    0.1305
Pt    0.2053    0.4804    0.1308
Pt    0.2057    0.4791    0.1668
Pt    0.2057    0.4808    0.2032
Pt    0.2030    0.4802    0.2422
Pt    0.2407    0.2587    0.1330
Pt    0.2407    0.2951    0.1321
Pt    0.2414    0.3330    0.2406
Pt    0.2412    0.3694    0.2391
Pt    0.2414    0.4449    0.2391
Pt    0.2431    0.4812    0.1290
Pt    0.2406    0.4812    0.2032
Pt    0.2409    0.4824    0.2404
Pt    0.0199    0.2790    0.1467
Pt    0.0214    0.2795    0.1842
Pt    0.0200    0.2790    0.2226
Pt    0.0199    0.3158    0.1471
Pt    0.0207    0.3176    0.1839
Pt    0.0196    0.3170    0.2223
Pt    0.0199    0.3541    0.1465
Pt    0.0203    0.3555    0.1844
Pt    0.0197    0.3543    0.2236
Pt    0.0190    0.3912    0.1866
Pt    0.0192    0.3906    0.2228
Pt    0.0199    0.4263    0.1861
Pt    0.0206    0.4247    0.2244
Pt    0.0185    0.4628    0.1494
Pt    0.0189    0.4622    0.1886
Pt    0.0578    0.2796    0.1468
Pt    0.0562    0.2791    0.1839
Pt    0.0568    0.2791    0.2223
Pt    0.0580    0.3170    0.1464
Pt    0.0565    0.3180    0.1839
Pt    0.0559    0.3161    0.2221
Pt    0.0569    0.3540    0.1843
Pt    0.0568    0.3545    0.2237
Pt    0.0586    0.3899    0.1851
Pt    0.0593    0.3914    0.2251
Pt    0.0556    0.4275    0.1502
Pt    0.0576    0.4259    0.1868
Pt    0.0611    0.4236    0.2277
Pt    0.0562    0.4626    0.1507
Pt    0.0562    0.4631    0.1862
Pt    0.0570    0.4625    0.2251
Pt    0.0933    0.2789    0.1471
Pt    0.0938    0.2789    0.1842
Pt    0.0931    0.2794    0.2207
Pt    0.0942    0.3161    0.1464
Pt    0.0937    0.3173    0.1839
Pt    0.0944    0.3172    0.2202
Pt    0.0949    0.3546    0.1862
Pt    0.0949    0.3530    0.2224
Pt    0.0953    0.3715    0.2037
Pt    0.0934    0.4247    0.1511
Pt    0.0949    0.4267    0.1860
Pt    0.0973    0.4255    0.2234
Pt    0.0946    0.4618    0.1488
Pt    0.0945    0.4629    0.1871
Pt    0.0941    0.4631    0.2252
Pt    0.1310    0.2797    0.1487
Pt    0.1327    0.2809    0.1828
Pt    0.0727    0.4992    0.1684
Pt    0.1128    0.4995    0.1689
Pt    0.0753    0.4983    0.1301
Pt    0.1113    0.5003    0.2051
Pt    0.1298    0.5000    0.2250
Pt    0.1497    0.4990    0.1679
Pt    0.0376    0.4985    0.1312
Pt    0.0013    0.2806    0.2029
Pt    0.1682    0.5006    0.2241
Pt    0.2051    0.4998    0.2234
Pt    0.1685    0.4997    0.1856
Pt    0.1502    0.5009    0.2039
Pt    0.0012    0.3175    0.1286
Pt    0.2057    0.4984    0.1840
Pt    0.2431    0.4983    0.1490
Pt    0.0170    0.4991    0.2255
Pt    0.1118    0.5003    0.2429
Pt    0.1315    0.5001    0.1494
Pt    0.0013    0.3547    0.2438
Pt    0.1866    0.5000    0.2050
Pt    0.1114    0.4996    0.1302
Pt    0.0183    0.4980    0.1886
Pt    0.2244    0.4988    0.1671
Pt    0.0015    0.3166    0.2426
Pt    0.0013    0.3347    0.2227
Pt    0.2238    0.4986    0.1292
Pt    0.2060    0.5000    0.1479
Pt    0.0363    0.4992    0.2069
Pt    0.1871    0.5003    0.1304
Pt    0.0358    0.4984    0.2442
Pt    0.0379    0.4989    0.1682
Pt    0.1863    0.4999    0.1665
Pt    0.1844    0.4979    0.2449
Pt    0.0751    0.4994    0.2057
Pt    0.0744    0.4999    0.2436
Pt    0.0012    0.2613    0.1479
Pt    0.0016    0.3180    0.2017
Pt    0.0012    0.2792    0.1657
Pt    0.0014    0.2985    0.1836
Pt    0.0024    0.3725    0.2239
Pt    0.0020    0.3554    0.1654
Pt    0.0019    0.2611    0.1841
Pt    0.0013    0.3357    0.1462
Pt    0.1482    0.5003    0.1300
Pt    0.2384    0.4629    0.3705
Pt    0.2404    0.4662    0.3345
Pt    0.2414    0.4642    0.2968
Pt    0.2401    0.5003    0.2978
Pt    0.2406    0.4631    0.2595
Pt    0.2408    0.4277    0.3716
Pt    0.2410    0.4271    0.3338
Pt    0.2397    0.4271    0.2969
Pt    0.2410    0.4261    0.2580
Pt    0.2401    0.3906    0.3713
Pt    0.2405    0.3891    0.3334
Pt    0.2406    0.3902    0.2957
Pt    0.0930    0.5000    0.2627
Pt    0.2418    0.3896    0.2595
Pt    0.2401    0.3530    0.3715
Pt    0.2408    0.3527    0.3339
Pt    0.2398    0.3526    0.2954
Pt    0.2423    0.3511    0.2591
Pt    0.2409    0.3149    0.3709
Pt    0.0375    0.2596    0.2588
Pt    0.0383    0.2611    0.2966
Pt    0.0404    0.2616    0.3343
Pt    0.0042    0.3369    0.3703
Pt    0.0396    0.2991    0.2594
Pt    0.0387    0.2976    0.2975
Pt    0.0414    0.2984    0.3345
Pt    0.0406    0.2989    0.3723
Pt    0.0381    0.3361    0.2605
Pt    0.0393    0.3359    0.2966
Pt    0.0407    0.3354    0.3344
Pt    0.0411    0.3348    0.3715
Pt    0.0398    0.3738    0.2607
Pt    0.0393    0.3719    0.2975
Pt    0.0402    0.3735    0.3336
Pt    0.0404    0.3716    0.3707
Pt    0.0430    0.4107    0.3698
Pt    0.0393    0.4469    0.3709
Pt    0.0406    0.4831    0.3708
Pt    0.0769    0.2615    0.2588
Pt    0.0770    0.2599    0.2971
Pt    0.0762    0.2611    0.3319
Pt    0.0787    0.2618    0.3714
Pt    0.0766    0.2984    0.2597
Pt    0.0766    0.2992    0.2967
Pt    0.0762    0.2994    0.3332
Pt    0.0758    0.2974    0.3706
Pt    0.0767    0.3358    0.2600
Pt    0.0780    0.3368    0.2970
Pt    0.0782    0.3378    0.3329
Pt    0.0763    0.3723    0.2594
Pt    0.0781    0.3721    0.2957
Pt    0.0752    0.3708    0.3710
Pt    0.0744    0.4815    0.2617
Pt    0.1144    0.2600    0.2578
Pt    0.1169    0.2602    0.2959
Pt    0.1147    0.2610    0.3339
Pt    0.1137    0.2971    0.2581
Pt    0.1134    0.2989    0.2962
Pt    0.1151    0.2983    0.3332
Pt    0.1140    0.3345    0.2577
Pt    0.1144    0.3377    0.2944
Pt    0.1503    0.2614    0.2963
Pt    0.1495    0.2974    0.2591
Pt    0.1493    0.2988    0.2947
Pt    0.1479    0.2983    0.3340
Pt    0.1497    0.3385    0.2970
Pt    0.1500    0.3345    0.3321
Pt    0.1845    0.2618    0.2977
Pt    0.1847    0.2973    0.2605
Pt    0.1874    0.2964    0.2965
Pt    0.1863    0.2948    0.3345
Pt    0.1861    0.2948    0.3714
Pt    0.1857    0.3350    0.2966
Pt    0.1874    0.3351    0.3328
Pt    0.1860    0.3329    0.3698
Pt    0.1860    0.3720    0.2970
Pt    0.1855    0.3715    0.3350
Pt    0.2211    0.2571    0.3327
Pt    0.2226    0.2583    0.3720
Pt    0.2223    0.2949    0.2953
Pt    0.2211    0.2952    0.3337
Pt    0.2218    0.2960    0.3710
Pt    0.2235    0.3326    0.2596
Pt    0.2240    0.3335    0.2940
Pt    0.2227    0.3339    0.3338
Pt    0.2228    0.3336    0.3714
Pt    0.2241    0.3699    0.2577
Pt    0.2226    0.3724    0.2973
Pt    0.2214    0.3717    0.3333
Pt    0.2208    0.3719    0.3720
Pt    0.2212    0.4083    0.2949
Pt    0.2227    0.4084    0.3344
Pt    0.2218    0.4090    0.3702
Pt    0.2223    0.4438    0.2581
Pt    0.2229    0.4456    0.2969
Pt    0.2201    0.4460    0.3334
Pt    0.2196    0.4456    0.3716
Pt    0.2230    0.4809    0.2603
Pt    0.2218    0.4825    0.2970
Pt    0.2216    0.4809    0.3719
Pt    0.2409    0.3155    0.3335
Pt    0.2397    0.3138    0.2956
Pt    0.2412    0.3127    0.2581
Pt    0.2403    0.2774    0.3708
Pt    0.2393    0.2755    0.3344
Pt    0.2398    0.2761    0.2964
Pt    0.2005    0.4635    0.3713
Pt    0.2037    0.4627    0.2949
Pt    0.2040    0.4626    0.2595
Pt    0.0218    0.2811    0.3729
Pt    0.0034    0.3162    0.2795
Pt    0.0387    0.2794    0.2766
Pt    0.0382    0.2793    0.3153
Pt    0.0402    0.2803    0.3531
Pt    0.0391    0.3159    0.2788
Pt    0.0401    0.3168    0.3159
Pt    0.0402    0.3164    0.3531
Pt    0.0384    0.3550    0.2788
Pt    0.0408    0.3542    0.3152
Pt    0.0418    0.3536    0.3532
Pt    0.0405    0.3934    0.3508
Pt    0.0750    0.2793    0.2782
Pt    0.0778    0.2795    0.3148
Pt    0.0770    0.2798    0.3519
Pt    0.0762    0.3166    0.2784
Pt    0.0781    0.3182    0.3164
Pt    0.0770    0.3163    0.3531
Pt    0.0776    0.3542    0.2772
Pt    0.0760    0.3560    0.3139
Pt    0.1145    0.2776    0.2766
Pt    0.1150    0.2796    0.3144
Pt    0.1139    0.3180    0.2773
Pt    0.1135    0.3184    0.3142
Pt    0.1523    0.2777    0.2750
Pt    0.1498    0.2785    0.3158
Pt    0.1510    0.3157    0.2749
Pt    0.1501    0.3165    0.3131
Pt    0.1861    0.2783    0.2785
Pt    0.1845    0.2779    0.3162
Pt    0.1868    0.2774    0.3532
Pt    0.1859    0.3163    0.2771
Pt    0.1857    0.3160    0.3154
Pt    0.1849    0.3160    0.3512
Pt    0.1869    0.3520    0.2770
Pt    0.1871    0.3533    0.3151
Pt    0.1851    0.3523    0.3523
Pt    0.2219    0.2770    0.3155
Pt    0.2205    0.2749    0.3520
Pt    0.2239    0.3130    0.2756
Pt    0.2217    0.3136    0.3150
Pt    0.2230    0.3151    0.3521
Pt    0.2220    0.3518    0.2762
Pt    0.2225    0.3532    0.3148
Pt    0.2223    0.3539    0.3542
Pt    0.2233    0.3894    0.2776
Pt    0.2222    0.3905    0.3150
Pt    0.2221    0.3904    0.3524
Pt    0.2222    0.4273    0.2775
Pt    0.2213    0.4273    0.3160
Pt    0.2216    0.4286    0.3521
Pt    0.2225    0.4631    0.2781
Pt    0.2220    0.4640    0.3149
Pt    0.2200    0.4654    0.3519
Pt    0.0205    0.2605    0.2786
Pt    0.0199    0.2610    0.3162
Pt    0.0215    0.2634    0.3533
Pt    0.0208    0.2971    0.2785
Pt    0.0215    0.2983    0.3161
Pt    0.0214    0.2979    0.3537
Pt    0.0200    0.3353    0.2797
Pt    0.0213    0.3347    0.3164
Pt    0.0223    0.3360    0.3533
Pt    0.0211    0.3741    0.2796
Pt    0.0203    0.3731    0.3153
Pt    0.0231    0.3737    0.3519
Pt    0.0220    0.4091    0.3534
Pt    0.0569    0.2595    0.2783
Pt    0.0576    0.2600    0.3138
Pt    0.0585    0.2609    0.3534
Pt    0.0579    0.2983    0.2791
Pt    0.0574    0.2975    0.3150
Pt    0.0583    0.2982    0.3534
Pt    0.0578    0.3362    0.2781
Pt    0.0591    0.3367    0.3157
Pt    0.0608    0.3358    0.3526
Pt    0.0585    0.3728    0.2797
Pt    0.0591    0.3746    0.3513
Pt    0.0949    0.2600    0.2788
Pt    0.0978    0.2611    0.3145
Pt    0.0952    0.2606    0.3524
Pt    0.0948    0.2972    0.2776
Pt    0.0948    0.2987    0.3141
Pt    0.0950    0.2981    0.3508
Pt    0.0953    0.3369    0.2775
Pt    0.0964    0.3371    0.3150
Pt    0.0945    0.3723    0.2762
Pt    0.1336    0.2597    0.2757
Pt    0.1331    0.2606    0.3166
Pt    0.1313    0.2978    0.2771
Pt    0.1323    0.2982    0.3137
Pt    0.1329    0.3359    0.2781
Pt    0.1312    0.3360    0.3147
Pt    0.1683    0.2981    0.2779
Pt    0.1681    0.2969    0.3157
Pt    0.1689    0.2976    0.3511
Pt    0.1670    0.3352    0.2785
Pt    0.1679    0.3357    0.3136
Pt    0.1671    0.3350    0.3510
Pt    0.2025    0.2597    0.3151
Pt    0.2059    0.2949    0.2760
Pt    0.2037    0.2966    0.3154
Pt    0.2041    0.2964    0.3536
Pt    0.2046    0.3326    0.2772
Pt    0.2058    0.3331    0.3131
Pt    0.2053    0.3352    0.3524
Pt    0.2055    0.3722    0.2792
Pt    0.2030    0.3725    0.3157
Pt    0.2026    0.3720    0.3527
Pt    0.2048    0.4087    0.3156
Pt    0.2035    0.4073    0.3521
Pt    0.2047    0.4450    0.2775
Pt    0.2026    0.4463    0.3514
Pt    0.2032    0.4806    0.2791
Pt    0.2390    0.2564    0.3155
Pt    0.2396    0.2581    0.3524
Pt    0.2400    0.2928    0.2774
Pt    0.2396    0.2952    0.3155
Pt    0.2401    0.2951    0.3510
Pt    0.2420    0.3319    0.2766
Pt    0.2399    0.3330    0.3144
Pt    0.2401    0.3350    0.3519
Pt    0.2405    0.3710    0.2783
Pt    0.2422    0.3704    0.3154
Pt    0.2404    0.3714    0.3528
Pt    0.2395    0.4086    0.2766
Pt    0.2408    0.4081    0.3149
Pt    0.2411    0.4096    0.3530
Pt    0.2406    0.4452    0.2774
Pt    0.2407    0.4464    0.3167
Pt    0.2400    0.4463    0.3520
Pt    0.2411    0.4817    0.2783
Pt    0.2400    0.4841    0.3169
Pt    0.2390    0.4834    0.3536
Pt    0.0197    0.2789    0.2603
Pt    0.0215    0.2797    0.2977
Pt    0.0214    0.2809    0.3348
Pt    0.0029    0.2617    0.3358
Pt    0.0208    0.3169    0.2609
Pt    0.0212    0.3158    0.2977
Pt    0.0209    0.3167    0.3350
Pt    0.0219    0.3171    0.3716
Pt    0.0202    0.3558    0.2613
Pt    0.0203    0.3547    0.2985
Pt    0.0231    0.3537    0.3339
Pt    0.0229    0.3525    0.3719
Pt    0.0216    0.3914    0.2602
Pt    0.0209    0.3919    0.3340
Pt    0.0223    0.3912    0.3706
Pt    0.0204    0.4285    0.3684
Pt    0.0208    0.4654    0.3696
Pt    0.0575    0.2791    0.2590
Pt    0.0571    0.2778    0.2964
Pt    0.0590    0.2798    0.3340
Pt    0.0588    0.2802    0.3716
Pt    0.0572    0.3177    0.2610
Pt    0.0588    0.3187    0.2981
Pt    0.0581    0.3180    0.3332
Pt    0.0574    0.3544    0.2598
Pt    0.0594    0.3550    0.2968
Pt    0.0587    0.3565    0.3339
Pt    0.0578    0.3535    0.3725
Pt    0.0579    0.3902    0.3704
Pt    0.0578    0.4646    0.3711
Pt    0.0955    0.2788    0.2581
Pt    0.0953    0.2802    0.2946
Pt    0.0966    0.2794    0.3335
Pt    0.0948    0.2800    0.3694
Pt    0.0950    0.3167    0.2598
Pt    0.0948    0.3179    0.2954
Pt    0.0961    0.3172    0.3333
Pt    0.0970    0.3543    0.2596
Pt    0.0962    0.3552    0.2973
Pt    0.0016    0.2603    0.2985
Pt    0.1333    0.2775    0.2575
Pt    0.1324    0.2799    0.2950
Pt    0.1308    0.2789    0.3351
Pt    0.1315    0.3168    0.2568
Pt    0.1325    0.3183    0.2949
Pt    0.1310    0.3173    0.3322
Pt    0.1678    0.2801    0.2962
Pt    0.1670    0.2784    0.3354
Pt    0.1686    0.3160    0.2955
Pt    0.1679    0.3158    0.3329
Pt    0.1691    0.3542    0.2963
Pt    0.1677    0.3542    0.3306
Pt    0.2062    0.2767    0.2961
Pt    0.2028    0.2758    0.3343
Pt    0.2044    0.2774    0.3713
Pt    0.2059    0.3136    0.2586
Pt    0.2054    0.3145    0.2952
Pt    0.2041    0.3151    0.3335
Pt    0.2038    0.3154    0.3703
Pt    0.2044    0.3527    0.2963
Pt    0.2060    0.3524    0.3341
Pt    0.2034    0.3537    0.3721
Pt    0.2017    0.3905    0.3336
Pt    0.2028    0.3903    0.3728
Pt    0.2037    0.4270    0.2969
Pt    0.2038    0.4266    0.3345
Pt    0.2019    0.4278    0.3689
Pt    0.0016    0.2984    0.2605
Pt    0.0026    0.3173    0.3540
Pt    0.0394    0.2622    0.3728
Pt    0.0024    0.3908    0.3520
Pt    0.2026    0.4994    0.2620
Pt    0.0040    0.3564    0.3525
Pt    0.0195    0.5010    0.3698
Pt    0.0020    0.2817    0.3552
Pt    0.2049    0.5001    0.2987
Pt    0.0020    0.3168    0.3168
Pt    0.0023    0.3750    0.3341
Pt    0.1305    0.5008    0.2633
Pt    0.0021    0.2619    0.3728
Pt    0.0020    0.4088    0.3708
Pt    0.0028    0.3375    0.3350
Pt    0.0027    0.3730    0.3703
Pt    0.0017    0.3743    0.2979
Pt    0.0020    0.3919    0.2799
Pt    0.2220    0.5002    0.2783
Pt    0.0015    0.3354    0.2988
Pt    0.0027    0.2996    0.3723
Pt    0.0011    0.3348    0.2622
Pt    0.0017    0.2603    0.2623
Pt    0.0021    0.3734    0.2618
Pt    0.0015    0.2994    0.2976
Pt    0.0020    0.2804    0.3164
Pt    0.0017    0.4463    0.3689
Pt    0.0024    0.3551    0.3169
Pt    0.0032    0.3555    0.2795
Pt    0.0724    0.4993    0.2794
Pt    0.2401    0.4649    0.4837
Pt    0.2395    0.4653    0.4468
Pt    0.2400    0.4650    0.4082
Pt    0.2419    0.4281    0.4844
Pt    0.2417    0.4282    0.4469
Pt    0.2421    0.4268    0.4082
Pt    0.2404    0.3905    0.4844
Pt    0.2412    0.3903    0.4462
Pt    0.2403    0.3903    0.4101
Pt    0.2405    0.3536    0.4837
Pt    0.2399    0.3515    0.4469
Pt    0.0027    0.4641    0.4248
Pt    0.0420    0.3710    0.4084
Pt    0.0389    0.3703    0.4458
Pt    0.0374    0.3702    0.4816
Pt    0.0401    0.4088    0.4085
Pt    0.0387    0.4080    0.4449
Pt    0.0377    0.4076    0.4825
Pt    0.0409    0.4461    0.4084
Pt    0.0390    0.4458    0.4439
Pt    0.0381    0.4447    0.4814
Pt    0.0394    0.4834    0.4065
Pt    0.0379    0.4827    0.4453
Pt    0.0388    0.4817    0.4831
Pt    0.0727    0.2605    0.4817
Pt    0.0776    0.4101    0.4435
Pt    0.0758    0.4084    0.4814
Pt    0.0764    0.4467    0.4064
Pt    0.0778    0.4466    0.4455
Pt    0.0766    0.4453    0.4815
Pt    0.0777    0.4846    0.4085
Pt    0.0766    0.4829    0.4443
Pt    0.0770    0.4829    0.4817
Pt    0.1120    0.4071    0.4823
Pt    0.1153    0.4458    0.4446
Pt    0.1152    0.4446    0.4830
Pt    0.1141    0.4831    0.4072
Pt    0.1147    0.4834    0.4433
Pt    0.1139    0.4826    0.4839
Pt    0.1500    0.4449    0.4446
Pt    0.1490    0.4430    0.4837
Pt    0.1526    0.4839    0.4431
Pt    0.1494    0.4822    0.4832
Pt    0.1850    0.4093    0.4075
Pt    0.1859    0.4086    0.4458
Pt    0.1857    0.4111    0.4842
Pt    0.1848    0.4457    0.4084
Pt    0.1851    0.4455    0.4471
Pt    0.1888    0.4483    0.4844
Pt    0.1873    0.4829    0.4101
Pt    0.1844    0.4833    0.4433
Pt    0.2222    0.2583    0.4462
Pt    0.2238    0.2599    0.4827
Pt    0.2208    0.2943    0.4074
Pt    0.2217    0.2961    0.4445
Pt    0.2232    0.2978    0.4833
Pt    0.2213    0.3341    0.4074
Pt    0.2207    0.3345    0.4461
Pt    0.2216    0.3710    0.4089
Pt    0.2220    0.3708    0.4455
Pt    0.2236    0.3725    0.4855
Pt    0.2225    0.4085    0.4104
Pt    0.2225    0.4091    0.4464
Pt    0.2223    0.4083    0.4863
Pt    0.2222    0.4451    0.4088
Pt    0.2231    0.4466    0.4470
Pt    0.2228    0.4456    0.4841
Pt    0.2217    0.4842    0.4081
Pt    0.2222    0.4849    0.4467
Pt    0.0957    0.5007    0.4828
Pt    0.0014    0.3895    0.4259
Pt    0.2403    0.3526    0.4079
Pt    0.2399    0.3173    0.4836
Pt    0.0019    0.4626    0.4641
Pt    0.2398    0.3147    0.4444
Pt    0.2399    0.3157    0.4084
Pt    0.2416    0.2783    0.4835
Pt    0.0021    0.4074    0.4448
Pt    0.2397    0.2779    0.4438
Pt    0.2406    0.2773    0.4081
Pt    0.0406    0.3521    0.3906
Pt    0.0405    0.3913    0.3894
Pt    0.0398    0.3895    0.4257
Pt    0.0391    0.3888    0.4625
Pt    0.0402    0.4276    0.3891
Pt    0.0394    0.4279    0.4270
Pt    0.0388    0.4266    0.4629
Pt    0.0393    0.4646    0.3892
Pt    0.0402    0.4657    0.4259
Pt    0.0384    0.4642    0.4630
Pt    0.0759    0.3908    0.4612
Pt    0.0772    0.4276    0.4254
Pt    0.0769    0.4265    0.4628
Pt    0.0778    0.4676    0.3887
Pt    0.0765    0.4647    0.4255
Pt    0.0772    0.4636    0.4630
Pt    0.1139    0.4265    0.4264
Pt    0.1153    0.4255    0.4627
Pt    0.1150    0.4641    0.4237
Pt    0.1143    0.4654    0.4647
Pt    0.1485    0.4254    0.4267
Pt    0.1499    0.4248    0.4646
Pt    0.1504    0.4645    0.4253
Pt    0.1502    0.4634    0.4639
Pt    0.1859    0.3900    0.4265
Pt    0.1866    0.3909    0.4653
Pt    0.1830    0.4282    0.3890
Pt    0.1852    0.4284    0.4279
Pt    0.1872    0.4292    0.4676
Pt    0.1841    0.4654    0.3899
Pt    0.1863    0.4644    0.4278
Pt    0.1864    0.4639    0.4649
Pt    0.2220    0.2760    0.3896
Pt    0.2213    0.2770    0.4268
Pt    0.2241    0.2783    0.4648
Pt    0.2218    0.3142    0.3893
Pt    0.2215    0.3160    0.4279
Pt    0.2205    0.3156    0.4638
Pt    0.2215    0.3523    0.3905
Pt    0.2219    0.3522    0.4268
Pt    0.2217    0.3528    0.4656
Pt    0.2213    0.3921    0.3893
Pt    0.2218    0.3887    0.4276
Pt    0.2221    0.3905    0.4663
Pt    0.2210    0.4270    0.3902
Pt    0.2227    0.4280    0.4282
Pt    0.2224    0.4279    0.4652
Pt    0.2212    0.4639    0.3902
Pt    0.2223    0.4657    0.4274
Pt    0.2217    0.4662    0.4664
Pt    0.0019    0.4070    0.4828
Pt    0.0212    0.3337    0.3903
Pt    0.0229    0.3720    0.3892
Pt    0.0213    0.3699    0.4265
Pt    0.0191    0.3704    0.4639
Pt    0.0221    0.4104    0.3877
Pt    0.0204    0.4084    0.4253
Pt    0.0199    0.4076    0.4641
Pt    0.0202    0.4457    0.3881
Pt    0.0209    0.4467    0.4258
Pt    0.0191    0.4450    0.4630
Pt    0.0203    0.4835    0.3883
Pt    0.0203    0.4828    0.4268
Pt    0.0191    0.4821    0.4652
Pt    0.0581    0.3725    0.3890
Pt    0.0577    0.3724    0.4648
Pt    0.0591    0.4078    0.3913
Pt    0.0585    0.4079    0.4262
Pt    0.0576    0.4094    0.4620
Pt    0.0578    0.4454    0.3888
Pt    0.0585    0.4462    0.4251
Pt    0.0580    0.4442    0.4623
Pt    0.0588    0.4839    0.3884
Pt    0.0577    0.4835    0.4261
Pt    0.0582    0.4816    0.4641
Pt    0.0957    0.3922    0.4456
Pt    0.0955    0.4095    0.4261
Pt    0.0955    0.4098    0.4634
Pt    0.0758    0.4260    0.3907
Pt    0.0955    0.4468    0.4244
Pt    0.0972    0.4455    0.4629
Pt    0.0967    0.4845    0.3897
Pt    0.0965    0.4843    0.4257
Pt    0.0951    0.4824    0.4649
Pt    0.1326    0.4448    0.4251
Pt    0.1318    0.4453    0.4635
Pt    0.1328    0.4832    0.4251
Pt    0.1320    0.4832    0.4645
Pt    0.1687    0.4077    0.4271
Pt    0.1694    0.4096    0.4648
Pt    0.1673    0.4453    0.4272
Pt    0.1671    0.4442    0.4661
Pt    0.1674    0.4816    0.4652
Pt    0.2044    0.2595    0.4643
Pt    0.2025    0.2952    0.4257
Pt    0.2054    0.2965    0.4632
Pt    0.2024    0.3331    0.3897
Pt    0.2035    0.3352    0.4263
Pt    0.2032    0.3720    0.3911
Pt    0.2026    0.3719    0.4281
Pt    0.2037    0.3725    0.4662
Pt    0.2020    0.4108    0.3886
Pt    0.2030    0.4099    0.4276
Pt    0.2046    0.4093    0.4664
Pt    0.2018    0.4456    0.3897
Pt    0.2044    0.4462    0.4288
Pt    0.2053    0.4465    0.4641
Pt    0.2032    0.4819    0.3907
Pt    0.2048    0.4847    0.4281
Pt    0.2400    0.2580    0.3916
Pt    0.2381    0.2572    0.4253
Pt    0.2421    0.2596    0.4641
Pt    0.2396    0.2962    0.3885
Pt    0.2396    0.2964    0.4251
Pt    0.2408    0.2970    0.4639
Pt    0.2398    0.3335    0.3895
Pt    0.2410    0.3344    0.4273
Pt    0.2409    0.3347    0.4649
Pt    0.2395    0.3726    0.3917
Pt    0.2412    0.3708    0.4278
Pt    0.2391    0.3719    0.4641
Pt    0.2410    0.4093    0.3895
Pt    0.2428    0.4081    0.4282
Pt    0.2404    0.4096    0.4663
Pt    0.2399    0.4459    0.3907
Pt    0.2412    0.4468    0.4274
Pt    0.2402    0.4472    0.4658
Pt    0.2398    0.4835    0.3897
Pt    0.2401    0.4840    0.4278
Pt    0.2392    0.4845    0.4653
Pt    0.0201    0.3531    0.4086
Pt    0.0209    0.3898    0.4071
Pt    0.0194    0.3892    0.4448
Pt    0.0197    0.3889    0.4825
Pt    0.0216    0.4278    0.4084
Pt    0.0198    0.4269    0.4444
Pt    0.0210    0.4266    0.4822
Pt    0.0211    0.4650    0.4075
Pt    0.0206    0.4642    0.4451
Pt    0.0202    0.4634    0.4823
Pt    0.0603    0.3889    0.4082
Pt    0.0565    0.3888    0.4454
Pt    0.0582    0.3909    0.4824
Pt    0.0585    0.4271    0.4081
Pt    0.0581    0.4278    0.4439
Pt    0.0560    0.4278    0.4822
Pt    0.0595    0.4655    0.4058
Pt    0.0583    0.4646    0.4449
Pt    0.0574    0.4634    0.4823
Pt    0.0771    0.3893    0.4298
Pt    0.0935    0.3905    0.4813
Pt    0.0960    0.4280    0.4073
Pt    0.0956    0.4284    0.4448
Pt    0.0951    0.4266    0.4833
Pt    0.0961    0.4643    0.4062
Pt    0.0976    0.4646    0.4453
Pt    0.0957    0.4631    0.4825
Pt    0.1336    0.4259    0.4447
Pt    0.1306    0.4248    0.4823
Pt    0.1333    0.4654    0.4442
Pt    0.1323    0.4634    0.4839
Pt    0.1667    0.4269    0.4086
Pt    0.1669    0.4266    0.4461
Pt    0.1702    0.4657    0.4092
Pt    0.1683    0.4637    0.4457
Pt    0.1663    0.4626    0.4841
Pt    0.2036    0.2773    0.4470
Pt    0.2047    0.2783    0.4818
Pt    0.2051    0.3152    0.4093
Pt    0.2018    0.3534    0.4087
Pt    0.2041    0.3537    0.4470
Pt    0.2041    0.3906    0.4089
Pt    0.2047    0.3900    0.4466
Pt    0.2035    0.3918    0.4841
Pt    0.2041    0.4271    0.4103
Pt    0.2036    0.4266    0.4477
Pt    0.2045    0.4279    0.4868
Pt    0.2054    0.4645    0.4098
Pt    0.2034    0.4659    0.4468
Pt    0.0732    0.2775    0.5007
Pt    0.0567    0.3710    0.4984
Pt    0.0571    0.5001    0.4824
Pt    0.0946    0.5010    0.4453
Pt    0.0019    0.4098    0.4066
Pt    0.0375    0.4622    0.5002
Pt    0.0029    0.3540    0.3884
Pt    0.0384    0.3896    0.5005
Pt    0.0024    0.4470    0.4074
Pt    0.0765    0.4258    0.5006
Pt    0.0936    0.4456    0.3891
Pt    0.0178    0.4063    0.5008
Pt    0.0012    0.4819    0.4825
Pt    0.0577    0.4082    0.5008
Pt    0.0030    0.4644    0.3882
Pt    0.0762    0.3886    0.4995
Pt    0.0017    0.4458    0.4828
Pt    0.0020    0.4272    0.3888
Pt    0.0383    0.3510    0.5006
Pt    0.0930    0.2620    0.4998
Pt    0.0029    0.3907    0.3885
Pt    0.0190    0.3688    0.4997
Pt    0.0019    0.4274    0.4254
Pt    0.0016    0.4454    0.4438
Pt    0.1140    0.5005    0.4638
Pt    0.2052    0.2613    0.5008
Pt    0.1305    0.2595    0.4996
Pt    0.0024    0.3715    0.4082
Pt    0.0023    0.4819    0.4450
Pt    0.0390    0.5008    0.4628
Pt    0.0761    0.5007    0.4641
Pt    0.2061    0.2976    0.4999
Pt    0.0576    0.4453    0.5005
Pt    0.0572    0.4817    0.5009
Pt    0.0194    0.5004    0.4823
Pt    0.0761    0.4623    0.5001
Pt    0.0378    0.5010    0.5004
Pt    0.2233    0.2787    0.4998
Pt    0.2428    0.4291    0.5224
Pt    0.2421    0.2793    0.5557
Pt    0.2422    0.2783    0.5197
Pt    0.2085    0.2827    0.5940
Pt    0.2041    0.2803    0.5568
Pt    0.2048    0.2799    0.5192
Pt    0.0559    0.3510    0.5566
Pt    0.1679    0.2815    0.5949
Pt    0.0198    0.5010    0.5946
Pt    0.1678    0.2821    0.5561
Pt    0.1305    0.4642    0.5947
Pt    0.0016    0.4450    0.5952
Pt    0.0346    0.2595    0.5190
Pt    0.0373    0.2605    0.5554
Pt    0.0369    0.2619    0.5939
Pt    0.0368    0.2975    0.5552
Pt    0.0373    0.2968    0.5926
Pt    0.0372    0.3330    0.5183
Pt    0.0344    0.3351    0.5577
Pt    0.0363    0.3317    0.5937
Pt    0.0375    0.3708    0.5182
Pt    0.0369    0.3683    0.5563
Pt    0.0377    0.4072    0.5193
Pt    0.0376    0.4045    0.5576
Pt    0.0390    0.4063    0.5946
Pt    0.0380    0.4440    0.5194
Pt    0.0377    0.4437    0.5572
Pt    0.0362    0.4434    0.5940
Pt    0.0384    0.4808    0.5193
Pt    0.0388    0.4821    0.5575
Pt    0.0385    0.4826    0.5951
Pt    0.0749    0.2609    0.5184
Pt    0.0757    0.2601    0.5563
Pt    0.0746    0.2625    0.5946
Pt    0.0747    0.2984    0.5175
Pt    0.0735    0.2983    0.5564
Pt    0.0737    0.2982    0.5939
Pt    0.0735    0.3329    0.5552
Pt    0.0736    0.3341    0.5938
Pt    0.0751    0.3694    0.5169
Pt    0.0753    0.3693    0.5573
Pt    0.0759    0.4088    0.5193
Pt    0.0756    0.4063    0.5567
Pt    0.0736    0.4079    0.5936
Pt    0.0763    0.4445    0.5195
Pt    0.0746    0.4444    0.5570
Pt    0.0746    0.4454    0.5928
Pt    0.0753    0.4811    0.5175
Pt    0.0749    0.4815    0.5566
Pt    0.0751    0.4829    0.5948
Pt    0.1137    0.2620    0.5186
Pt    0.1122    0.2610    0.5564
Pt    0.1110    0.2619    0.5938
Pt    0.1127    0.2959    0.5188
Pt    0.1123    0.2973    0.5548
Pt    0.1131    0.2992    0.5925
Pt    0.1119    0.4070    0.5209
Pt    0.1126    0.4263    0.5751
Pt    0.1137    0.4433    0.5202
Pt    0.1126    0.4444    0.5584
Pt    0.1121    0.4430    0.5927
Pt    0.1133    0.4824    0.5194
Pt    0.1131    0.4820    0.5573
Pt    0.1115    0.4825    0.5930
Pt    0.1489    0.2614    0.5186
Pt    0.1494    0.2620    0.5566
Pt    0.1485    0.2624    0.5941
Pt    0.1502    0.2997    0.5558
Pt    0.1501    0.2990    0.5939
Pt    0.1484    0.4843    0.5939
Pt    0.1848    0.2627    0.5196
Pt    0.1847    0.2611    0.5569
Pt    0.1874    0.2631    0.5929
Pt    0.1877    0.2987    0.5942
Pt    0.2230    0.2600    0.5205
Pt    0.2228    0.2615    0.5565
Pt    0.2257    0.2634    0.5933
Pt    0.2224    0.2971    0.5194
Pt    0.2242    0.2970    0.5563
Pt    0.1310    0.4635    0.5566
Pt    0.1487    0.4640    0.5027
Pt    0.1316    0.4635    0.5223
Pt    0.1307    0.2806    0.5936
Pt    0.1312    0.2790    0.5557
Pt    0.1324    0.2789    0.5184
Pt    0.0938    0.4632    0.5946
Pt    0.0953    0.4633    0.5575
Pt    0.2426    0.3715    0.5030
Pt    0.0938    0.4631    0.5201
Pt    0.0933    0.4259    0.5569
Pt    0.2244    0.5000    0.6127
Pt    0.1324    0.4822    0.5034
Pt    0.0367    0.2789    0.5366
Pt    0.0362    0.2787    0.5742
Pt    0.0367    0.2808    0.6135
Pt    0.0347    0.3133    0.5348
Pt    0.0359    0.3156    0.5742
Pt    0.0356    0.3141    0.6120
Pt    0.2429    0.2587    0.5016
Pt    0.0371    0.3521    0.5373
Pt    0.0375    0.3519    0.5774
Pt    0.0197    0.4999    0.5574
Pt    0.0386    0.3875    0.5376
Pt    0.0395    0.3872    0.5767
Pt    0.0579    0.3509    0.5168
Pt    0.0380    0.4251    0.5391
Pt    0.0364    0.4235    0.5751
Pt    0.0347    0.4251    0.6123
Pt    0.1327    0.4435    0.5028
Pt    0.0377    0.4635    0.5403
Pt    0.0379    0.4624    0.5764
Pt    0.0373    0.4642    0.6134
Pt    0.0549    0.3155    0.5938
Pt    0.0739    0.2792    0.5360
Pt    0.0747    0.2797    0.5746
Pt    0.0754    0.2811    0.6127
Pt    0.0746    0.3162    0.5372
Pt    0.0741    0.3158    0.5749
Pt    0.0732    0.3159    0.6115
Pt    0.0748    0.3496    0.5349
Pt    0.0740    0.3509    0.5747
Pt    0.0537    0.3161    0.5549
Pt    0.0756    0.3862    0.5384
Pt    0.0752    0.3881    0.5750
Pt    0.0946    0.4267    0.5204
Pt    0.0747    0.4269    0.5381
Pt    0.0754    0.4253    0.5758
Pt    0.0561    0.2795    0.5932
Pt    0.0757    0.4634    0.5379
Pt    0.0747    0.4630    0.5759
Pt    0.0756    0.4633    0.6123
Pt    0.1126    0.2788    0.5373
Pt    0.1108    0.2803    0.5754
Pt    0.1119    0.2808    0.6134
Pt    0.1120    0.3150    0.5368
Pt    0.1133    0.3157    0.5723
Pt    0.1134    0.4620    0.5024
Pt    0.1125    0.4256    0.5405
Pt    0.0190    0.4645    0.5952
Pt    0.1126    0.4635    0.5386
Pt    0.1140    0.4628    0.5760
Pt    0.1115    0.4618    0.6121
Pt    0.1503    0.2805    0.5368
Pt    0.1495    0.2801    0.5752
Pt    0.1483    0.2819    0.6123
Pt    0.0934    0.3878    0.5191
Pt    0.1520    0.4630    0.6102
Pt    0.1875    0.2818    0.5375
Pt    0.1861    0.2809    0.5754
Pt    0.1880    0.2798    0.6109
Pt    0.0932    0.3151    0.5920
Pt    0.2231    0.2796    0.5377
Pt    0.2250    0.2804    0.5739
Pt    0.2262    0.2799    0.6123
Pt    0.0574    0.5001    0.5192
Pt    0.0175    0.2612    0.5373
Pt    0.0181    0.2597    0.5750
Pt    0.0183    0.2615    0.6125
Pt    0.0179    0.2976    0.5725
Pt    0.0156    0.2980    0.6102
Pt    0.0189    0.3337    0.5363
Pt    0.0938    0.3158    0.5558
Pt    0.0180    0.3703    0.5363
Pt    0.0194    0.3702    0.5762
Pt    0.0940    0.3161    0.5188
Pt    0.0185    0.4057    0.5386
Pt    0.0187    0.4046    0.5759
Pt    0.0189    0.4053    0.6129
Pt    0.0558    0.4100    0.6133
Pt    0.0203    0.4429    0.5389
Pt    0.0199    0.4441    0.5757
Pt    0.0182    0.4449    0.6141
Pt    0.0930    0.2816    0.5942
Pt    0.0199    0.4823    0.5379
Pt    0.0191    0.4812    0.5759
Pt    0.0199    0.4823    0.6145
Pt    0.0557    0.2616    0.5377
Pt    0.0571    0.2612    0.5747
Pt    0.0550    0.2624    0.6130
Pt    0.0554    0.2974    0.5356
Pt    0.0557    0.2977    0.5745
Pt    0.0555    0.2977    0.6140
Pt    0.0546    0.3340    0.5374
Pt    0.0550    0.3341    0.5753
Pt    0.0936    0.2784    0.5557
Pt    0.0576    0.3691    0.5366
Pt    0.0577    0.3694    0.5769
Pt    0.0929    0.2802    0.5168
Pt    0.0580    0.4066    0.5379
Pt    0.0567    0.4057    0.5749
Pt    0.0741    0.4270    0.6101
Pt    0.0569    0.4626    0.5939
Pt    0.0556    0.4453    0.5376
Pt    0.0558    0.4437    0.5761
Pt    0.0559    0.4445    0.6121
Pt    0.0564    0.4624    0.5567
Pt    0.0565    0.4825    0.5372
Pt    0.0566    0.4831    0.5753
Pt    0.0571    0.4813    0.6127
Pt    0.0556    0.4627    0.5193
Pt    0.0938    0.2611    0.5364
Pt    0.0929    0.2613    0.5743
Pt    0.0947    0.2625    0.6128
Pt    0.0925    0.2968    0.5369
Pt    0.0930    0.2981    0.5747
Pt    0.0930    0.2997    0.6130
Pt    0.0936    0.3336    0.5379
Pt    0.0931    0.3336    0.5738
Pt    0.0546    0.4255    0.5931
Pt    0.0943    0.4070    0.5395
Pt    0.0933    0.4089    0.5768
Pt    0.0189    0.4635    0.5575
Pt    0.0959    0.4444    0.5386
Pt    0.0937    0.4445    0.5752
Pt    0.0946    0.4429    0.6106
Pt    0.0560    0.3149    0.5188
Pt    0.0938    0.4820    0.5387
Pt    0.0929    0.4820    0.5757
Pt    0.0941    0.4823    0.6124
Pt    0.0563    0.4243    0.5563
Pt    0.1314    0.2613    0.5367
Pt    0.1302    0.2616    0.5756
Pt    0.1290    0.2616    0.6122
Pt    0.1311    0.2978    0.5382
Pt    0.1324    0.2976    0.5739
Pt    0.1303    0.3018    0.6132
Pt    0.1107    0.4070    0.5583
Pt    0.0540    0.2782    0.5182
Pt    0.1305    0.4451    0.5398
Pt    0.1321    0.4439    0.6116
Pt    0.0556    0.2805    0.5566
Pt    0.1314    0.4832    0.5389
Pt    0.1313    0.4825    0.5756
Pt    0.1304    0.4826    0.6116
Pt    0.1682    0.2627    0.5371
Pt    0.1681    0.2611    0.5763
Pt    0.1688    0.2624    0.6116
Pt    0.1688    0.2984    0.5749
Pt    0.1673    0.2998    0.6114
Pt    0.1676    0.4831    0.6101
Pt    0.0566    0.4257    0.5198
Pt    0.2038    0.2616    0.5383
Pt    0.2044    0.2626    0.5755
Pt    0.2070    0.2624    0.6121
Pt    0.0561    0.3864    0.5565
Pt    0.2072    0.2986    0.5390
Pt    0.2059    0.2969    0.5742
Pt    0.0569    0.3903    0.5179
Pt    0.2437    0.2596    0.5376
Pt    0.2436    0.2626    0.5755
Pt    0.2449    0.2616    0.6127
Pt    0.0388    0.5000    0.5378
Pt    0.2428    0.2971    0.5376
Pt    0.0200    0.4627    0.5207
Pt    0.2404    0.4085    0.5049
Pt    0.2421    0.4815    0.6111
Pt    0.0182    0.2800    0.5546
Pt    0.0173    0.2799    0.5939
Pt    0.0187    0.3150    0.5543
Pt    0.0173    0.3140    0.5922
Pt    0.0185    0.3506    0.5177
Pt    0.0164    0.3513    0.5577
Pt    0.0174    0.3879    0.5186
Pt    0.0191    0.3868    0.5569
Pt    0.0209    0.3878    0.5951
Pt    0.0181    0.4260    0.5205
Pt    0.0180    0.4246    0.5573
Pt    0.0183    0.4247    0.5945
Pt    0.0015    0.4631    0.5396
Pt    0.0200    0.5006    0.5191
Pt    0.0749    0.5008    0.5374
Pt    0.2407    0.2978    0.5024
Pt    0.0012    0.4253    0.6144
Pt    0.0750    0.5009    0.6142
Pt    0.2253    0.4286    0.5037
Pt    0.1128    0.5001    0.5380
Pt    0.0947    0.4812    0.5015
Pt    0.0012    0.4629    0.5014
Pt    0.0205    0.4455    0.5015
Pt    0.0945    0.5003    0.5577
Pt    0.0955    0.4066    0.5014
Pt    0.1134    0.4254    0.5014
Pt    0.0955    0.4446    0.5015
Pt    0.0203    0.4829    0.5012
Pt    0.0760    0.5010    0.5015
Pt    0.0380    0.4265    0.5015
Pt    0.2412    0.4633    0.7427
Pt    0.2428    0.4643    0.7037
Pt    0.2425    0.4636    0.6675
Pt    0.0017    0.4832    0.6325
Pt    0.0016    0.4441    0.6329
Pt    0.0013    0.3703    0.7382
Pt    0.1110    0.4996    0.7263
Pt    0.2044    0.5002    0.7414
Pt    0.2418    0.5006    0.7424
Pt    0.0363    0.2617    0.6304
Pt    0.0370    0.2611    0.6670
Pt    0.0382    0.2611    0.7042
Pt    0.0394    0.2616    0.7430
Pt    0.0352    0.2974    0.6318
Pt    0.0371    0.2967    0.7055
Pt    0.0377    0.2984    0.7402
Pt    0.0030    0.4075    0.7391
Pt    0.0378    0.4447    0.6305
Pt    0.0378    0.4816    0.6328
Pt    0.0765    0.2623    0.6322
Pt    0.0761    0.2608    0.6686
Pt    0.0744    0.2629    0.7058
Pt    0.0764    0.2618    0.7434
Pt    0.0746    0.2999    0.6323
Pt    0.0746    0.2993    0.6678
Pt    0.0747    0.2969    0.7028
Pt    0.0751    0.4818    0.6310
Pt    0.1125    0.2618    0.6316
Pt    0.1127    0.2618    0.6686
Pt    0.1123    0.2607    0.7057
Pt    0.1134    0.2622    0.7446
Pt    0.1109    0.3000    0.6308
Pt    0.1107    0.3002    0.6690
Pt    0.1121    0.4438    0.6303
Pt    0.1122    0.4823    0.6302
Pt    0.1100    0.4842    0.6679
Pt    0.1108    0.4832    0.7457
Pt    0.1494    0.2616    0.6282
Pt    0.1496    0.2617    0.6672
Pt    0.1511    0.2595    0.7050
Pt    0.1509    0.2614    0.7434
Pt    0.1487    0.3007    0.6318
Pt    0.1515    0.2985    0.6672
Pt    0.1505    0.2960    0.7047
Pt    0.1489    0.3355    0.6689
Pt    0.1484    0.3332    0.7051
Pt    0.1503    0.4055    0.7028
Pt    0.1497    0.4055    0.7407
Pt    0.1491    0.4460    0.6297
Pt    0.1478    0.4451    0.6665
Pt    0.1484    0.4451    0.7042
Pt    0.1489    0.4456    0.7426
Pt    0.1493    0.4825    0.6290
Pt    0.1471    0.4829    0.6687
Pt    0.1471    0.4822    0.7045
Pt    0.1487    0.4826    0.7423
Pt    0.1889    0.2612    0.6308
Pt    0.1869    0.2622    0.6691
Pt    0.1904    0.2616    0.7054
Pt    0.1901    0.2615    0.7433
Pt    0.1870    0.2978    0.6293
Pt    0.1869    0.2985    0.6675
Pt    0.1868    0.2970    0.7055
Pt    0.1887    0.2981    0.7421
Pt    0.1864    0.3354    0.6669
Pt    0.1867    0.3345    0.7053
Pt    0.1873    0.3696    0.6682
Pt    0.1868    0.3703    0.7041
Pt    0.1847    0.3689    0.7426
Pt    0.1849    0.4101    0.6668
Pt    0.1851    0.4071    0.7041
Pt    0.1857    0.4059    0.7432
Pt    0.1847    0.4457    0.6683
Pt    0.1863    0.4454    0.7057
Pt    0.1866    0.4442    0.7412
Pt    0.1855    0.4828    0.6293
Pt    0.1847    0.4829    0.6675
Pt    0.1845    0.4826    0.7048
Pt    0.1863    0.4825    0.7414
Pt    0.2258    0.2613    0.6307
Pt    0.2273    0.2610    0.6685
Pt    0.2267    0.2608    0.7061
Pt    0.2238    0.2963    0.6307
Pt    0.2253    0.2991    0.6685
Pt    0.2264    0.2981    0.7055
Pt    0.2238    0.3340    0.6678
Pt    0.2240    0.3345    0.7056
Pt    0.2238    0.3716    0.6665
Pt    0.2244    0.3699    0.7058
Pt    0.2242    0.3705    0.7424
Pt    0.2236    0.4099    0.6321
Pt    0.2235    0.4084    0.6667
Pt    0.2222    0.4079    0.7054
Pt    0.2229    0.4072    0.7423
Pt    0.2242    0.4450    0.6301
Pt    0.2239    0.4448    0.6683
Pt    0.2243    0.4451    0.7047
Pt    0.2232    0.4451    0.7428
Pt    0.2420    0.5007    0.7060
Pt    0.2227    0.4827    0.6665
Pt    0.2240    0.4824    0.7051
Pt    0.2234    0.4823    0.7427
Pt    0.2412    0.4262    0.7428
Pt    0.1286    0.4999    0.7048
Pt    0.2434    0.4255    0.7051
Pt    0.0353    0.2800    0.6513
Pt    0.0383    0.2806    0.6854
Pt    0.0383    0.2784    0.7233
Pt    0.0749    0.2808    0.6504
Pt    0.0744    0.2799    0.6848
Pt    0.0749    0.2804    0.7242
Pt    0.1118    0.2813    0.6493
Pt    0.1115    0.2813    0.6880
Pt    0.1127    0.2786    0.7255
Pt    0.1129    0.4646    0.6486
Pt    0.1505    0.2802    0.6482
Pt    0.1500    0.2787    0.6860
Pt    0.1513    0.2785    0.7258
Pt    0.1497    0.3180    0.6506
Pt    0.1490    0.3167    0.6866
Pt    0.1499    0.3153    0.7237
Pt    0.1480    0.4266    0.6862
Pt    0.1507    0.4264    0.7238
Pt    0.1493    0.4637    0.6467
Pt    0.1481    0.4637    0.6858
Pt    0.1493    0.4627    0.7241
Pt    0.1878    0.2797    0.6490
Pt    0.1885    0.2803    0.6871
Pt    0.1886    0.2794    0.7247
Pt    0.1868    0.3164    0.6486
Pt    0.1862    0.3170    0.6859
Pt    0.1871    0.3155    0.7235
Pt    0.1864    0.3521    0.6863
Pt    0.1863    0.3518    0.7225
Pt    0.1861    0.3909    0.6844
Pt    0.1859    0.3880    0.7249
Pt    0.1861    0.4281    0.6483
Pt    0.1842    0.4271    0.6863
Pt    0.1858    0.4253    0.7245
Pt    0.1862    0.4647    0.6483
Pt    0.1851    0.4637    0.6856
Pt    0.1860    0.4640    0.7233
Pt    0.2252    0.2808    0.6507
Pt    0.2259    0.2783    0.6875
Pt    0.2243    0.3161    0.6480
Pt    0.2247    0.3171    0.6863
Pt    0.2241    0.3158    0.7232
Pt    0.2268    0.3522    0.6865
Pt    0.2251    0.3517    0.7258
Pt    0.2235    0.3873    0.6858
Pt    0.2233    0.3891    0.7237
Pt    0.2246    0.4285    0.6496
Pt    0.2249    0.4260    0.6864
Pt    0.2225    0.4257    0.7237
Pt    0.2221    0.4641    0.6493
Pt    0.2227    0.4639    0.6864
Pt    0.2235    0.4639    0.7251
Pt    0.0186    0.2613    0.6489
Pt    0.0193    0.2623    0.6851
Pt    0.0181    0.2610    0.7226
Pt    0.0181    0.2993    0.7220
Pt    0.0565    0.2619    0.6494
Pt    0.0568    0.2612    0.6867
Pt    0.0568    0.2605    0.7244
Pt    0.0536    0.2968    0.6491
Pt    0.0565    0.2981    0.7220
Pt    0.0949    0.2619    0.6509
Pt    0.0932    0.2616    0.6878
Pt    0.0944    0.2609    0.7255
Pt    0.0934    0.2992    0.6508
Pt    0.0931    0.2988    0.6867
Pt    0.0937    0.4815    0.6483
Pt    0.1317    0.2623    0.6489
Pt    0.1305    0.2614    0.6868
Pt    0.1318    0.2614    0.7244
Pt    0.1312    0.3001    0.6484
Pt    0.1313    0.2981    0.6852
Pt    0.1319    0.2960    0.7239
Pt    0.1332    0.4070    0.7220
Pt    0.1307    0.4462    0.6476
Pt    0.1306    0.4434    0.7238
Pt    0.1308    0.4828    0.6484
Pt    0.1276    0.4808    0.6873
Pt    0.1298    0.4832    0.7246
Pt    0.1682    0.2617    0.6484
Pt    0.1687    0.2613    0.6867
Pt    0.1698    0.2601    0.7253
Pt    0.1682    0.2984    0.6491
Pt    0.1687    0.2966    0.6861
Pt    0.1682    0.2970    0.7250
Pt    0.1681    0.3347    0.6491
Pt    0.1674    0.3352    0.6867
Pt    0.1684    0.3323    0.7228
Pt    0.1681    0.3713    0.6852
Pt    0.1667    0.3710    0.7238
Pt    0.1667    0.4074    0.6836
Pt    0.1663    0.4060    0.7239
Pt    0.1679    0.4463    0.6496
Pt    0.1661    0.4452    0.6859
Pt    0.1671    0.4445    0.7236
Pt    0.1676    0.4827    0.6464
Pt    0.1661    0.4824    0.6855
Pt    0.1658    0.4827    0.7218
Pt    0.2076    0.2622    0.6511
Pt    0.2070    0.2606    0.6868
Pt    0.2091    0.2607    0.7264
Pt    0.2052    0.2978    0.6479
Pt    0.2069    0.2970    0.6879
Pt    0.2055    0.2977    0.7241
Pt    0.2066    0.3341    0.6489
Pt    0.2057    0.3349    0.6855
Pt    0.2071    0.3349    0.7239
Pt    0.2054    0.3708    0.6858
Pt    0.2050    0.3703    0.7236
Pt    0.2046    0.4093    0.6501
Pt    0.2050    0.4089    0.6853
Pt    0.2036    0.4067    0.7231
Pt    0.2032    0.4452    0.6498
Pt    0.2050    0.4454    0.6869
Pt    0.2055    0.4442    0.7237
Pt    0.2041    0.4830    0.6484
Pt    0.2046    0.4826    0.6867
Pt    0.2053    0.4827    0.7225
Pt    0.2447    0.2623    0.6499
Pt    0.2448    0.2617    0.6877
Pt    0.2421    0.2978    0.6873
Pt    0.2423    0.3709    0.6854
Pt    0.2439    0.3701    0.7247
Pt    0.2424    0.4071    0.6488
Pt    0.2418    0.4065    0.6858
Pt    0.2409    0.4083    0.7243
Pt    0.2435    0.4471    0.6479
Pt    0.2433    0.4452    0.6868
Pt    0.2411    0.4457    0.7236
Pt    0.2412    0.4826    0.6493
Pt    0.2407    0.4826    0.6849
Pt    0.2423    0.4821    0.7238
Pt    0.0168    0.2804    0.6310
Pt    0.0186    0.2799    0.7037
Pt    0.0199    0.2796    0.7410
Pt    0.0201    0.4276    0.7403
Pt    0.0206    0.4635    0.6321
Pt    0.0567    0.2797    0.6315
Pt    0.0561    0.2794    0.6682
Pt    0.0562    0.2797    0.7034
Pt    0.0560    0.2808    0.7414
Pt    0.0568    0.4627    0.6310
Pt    0.0929    0.2815    0.6315
Pt    0.0941    0.2810    0.6694
Pt    0.0943    0.2806    0.7065
Pt    0.0937    0.4620    0.6304
Pt    0.1307    0.2818    0.6313
Pt    0.1309    0.2805    0.6670
Pt    0.1317    0.2792    0.7060
Pt    0.1318    0.2795    0.7438
Pt    0.1302    0.3167    0.6681
Pt    0.1318    0.3144    0.7051
Pt    0.1317    0.4281    0.6314
Pt    0.1327    0.4255    0.7047
Pt    0.1308    0.4255    0.7410
Pt    0.1301    0.4636    0.6283
Pt    0.1303    0.4635    0.6670
Pt    0.1293    0.4620    0.7060
Pt    0.1298    0.4636    0.7421
Pt    0.1684    0.2806    0.6305
Pt    0.1690    0.2793    0.6673
Pt    0.1696    0.2775    0.7062
Pt    0.1708    0.2781    0.7434
Pt    0.1684    0.3163    0.6309
Pt    0.1680    0.3168    0.6676
Pt    0.1679    0.3147    0.7048
Pt    0.1676    0.3534    0.6686
Pt    0.1664    0.3523    0.7064
Pt    0.1689    0.3883    0.7049
Pt    0.1675    0.3865    0.7435
Pt    0.1649    0.4266    0.6658
Pt    0.1668    0.4252    0.7052
Pt    0.1684    0.4252    0.7426
Pt    0.1688    0.4631    0.6285
Pt    0.1659    0.4644    0.6670
Pt    0.1666    0.4632    0.7054
Pt    0.1685    0.4641    0.7417
Pt    0.2064    0.2790    0.6312
Pt    0.2056    0.2813    0.6681
Pt    0.2085    0.2787    0.7069
Pt    0.2043    0.3160    0.6293
Pt    0.2053    0.3168    0.6676
Pt    0.2049    0.3164    0.7049
Pt    0.2062    0.3160    0.7407
Pt    0.2074    0.3525    0.6662
Pt    0.2059    0.3517    0.7042
Pt    0.2067    0.3525    0.7441
Pt    0.2042    0.3898    0.6670
Pt    0.2044    0.3893    0.7041
Pt    0.2043    0.3871    0.7433
Pt    0.2055    0.4268    0.6322
Pt    0.2049    0.4282    0.6687
Pt    0.2037    0.4259    0.7060
Pt    0.2042    0.4256    0.7429
Pt    0.2042    0.4622    0.6309
Pt    0.2043    0.4633    0.6685
Pt    0.2034    0.4646    0.7056
Pt    0.2043    0.4629    0.7409
Pt    0.2435    0.2804    0.6322
Pt    0.2446    0.2804    0.6689
Pt    0.2422    0.3186    0.7045
Pt    0.2437    0.3513    0.7069
Pt    0.2414    0.3892    0.6661
Pt    0.2417    0.3890    0.7044
Pt    0.2427    0.3891    0.7432
Pt    0.2432    0.4273    0.6301
Pt    0.2434    0.4267    0.6684
Pt    0.1298    0.5005    0.7433
Pt    0.2425    0.4645    0.6296
Pt    0.0017    0.4281    0.7242
Pt    0.2422    0.5001    0.6295
Pt    0.0014    0.2972    0.7415
Pt    0.2223    0.4813    0.6303
Pt    0.0568    0.5009    0.6321
Pt    0.1129    0.5008    0.6486
Pt    0.0197    0.5003    0.6333
Pt    0.1293    0.5004    0.6679
Pt    0.2039    0.5007    0.6278
Pt    0.2037    0.5009    0.7053
Pt    0.0039    0.4660    0.7580
Pt    0.0038    0.3535    0.7580
Pt    0.0035    0.4101    0.8149
Pt    0.0033    0.4483    0.8517
Pt    0.0041    0.3346    0.7774
Pt    0.0035    0.4284    0.8702
Pt    0.0032    0.2787    0.8350
Pt    0.0024    0.4660    0.7951
Pt    0.0033    0.3542    0.8703
Pt    0.1839    0.5005    0.8741
Pt    0.0031    0.3342    0.8160
Pt    0.0024    0.3542    0.8340
Pt    0.0028    0.4100    0.7776
Pt    0.0018    0.2590    0.7787
Pt    0.0028    0.4095    0.8522
Pt    0.0028    0.2782    0.7990
Pt    0.0035    0.4860    0.8150
Pt    0.0039    0.4465    0.8150
Pt    0.0029    0.3169    0.7971
Pt    0.0031    0.3718    0.8133
Pt    0.0015    0.3169    0.8722
Pt    0.0388    0.2604    0.7791
Pt    0.0389    0.2957    0.7809
Pt    0.0379    0.2970    0.8159
Pt    0.0397    0.2985    0.8519
Pt    0.0431    0.3340    0.8151
Pt    0.0407    0.3325    0.8522
Pt    0.0378    0.3718    0.7773
Pt    0.0398    0.3709    0.8148
Pt    0.0403    0.3719    0.8520
Pt    0.0397    0.4071    0.7759
Pt    0.0410    0.4095    0.8130
Pt    0.0410    0.4096    0.8512
Pt    0.0389    0.4476    0.7754
Pt    0.0411    0.4470    0.8136
Pt    0.0392    0.4476    0.8519
Pt    0.0407    0.4841    0.8146
Pt    0.0396    0.4841    0.8536
Pt    0.0766    0.4068    0.7773
Pt    0.0765    0.4075    0.8140
Pt    0.0773    0.4079    0.8520
Pt    0.0776    0.4442    0.7764
Pt    0.0759    0.4463    0.8152
Pt    0.0753    0.4461    0.8533
Pt    0.0778    0.4826    0.7776
Pt    0.0769    0.4827    0.8146
Pt    0.1303    0.4068    0.7988
Pt    0.1131    0.4443    0.7774
Pt    0.1127    0.4432    0.8155
Pt    0.1120    0.4816    0.7790
Pt    0.1093    0.4834    0.8197
Pt    0.1485    0.3896    0.7959
Pt    0.1487    0.4072    0.7798
Pt    0.1508    0.4074    0.8161
Pt    0.1498    0.4441    0.7785
Pt    0.1490    0.4426    0.8159
Pt    0.1493    0.4822    0.7799
Pt    0.1491    0.4821    0.8164
Pt    0.1479    0.4812    0.8529
Pt    0.1869    0.3709    0.7809
Pt    0.1866    0.4053    0.7805
Pt    0.1857    0.4062    0.8182
Pt    0.1877    0.4115    0.8569
Pt    0.1863    0.4438    0.7796
Pt    0.1869    0.4446    0.8161
Pt    0.1844    0.4437    0.8566
Pt    0.1870    0.4832    0.7796
Pt    0.1862    0.4828    0.8183
Pt    0.1860    0.4822    0.8535
Pt    0.2231    0.3367    0.8548
Pt    0.2243    0.3691    0.7810
Pt    0.2256    0.3704    0.8165
Pt    0.2241    0.3738    0.8544
Pt    0.2234    0.4069    0.7801
Pt    0.2243    0.4069    0.8184
Pt    0.2245    0.4095    0.8552
Pt    0.2223    0.4435    0.7805
Pt    0.2225    0.4451    0.8160
Pt    0.2234    0.4463    0.8553
Pt    0.2228    0.4819    0.7803
Pt    0.2243    0.4825    0.8164
Pt    0.2219    0.4825    0.8544
Pt    0.2219    0.4648    0.8740
Pt    0.0034    0.4282    0.7950
Pt    0.0016    0.3161    0.8345
Pt    0.0024    0.2984    0.8530
Pt    0.0021    0.2978    0.7791
Pt    0.0035    0.3170    0.7582
Pt    0.2436    0.4295    0.8564
Pt    0.0031    0.3902    0.8329
Pt    0.1478    0.5003    0.8355
Pt    0.0030    0.3521    0.7962
Pt    0.1292    0.5002    0.7800
Pt    0.0014    0.2967    0.8161
Pt    0.1114    0.5001    0.7991
Pt    0.0030    0.3912    0.7955
Pt    0.1294    0.4999    0.8166
Pt    0.0019    0.3914    0.8712
Pt    0.2418    0.4631    0.8170
Pt    0.0023    0.2800    0.7606
Pt    0.0015    0.4278    0.8339
Pt    0.2432    0.4271    0.8189
Pt    0.2423    0.4628    0.7808
Pt    0.0037    0.4469    0.7758
Pt    0.0025    0.4662    0.8335
Pt    0.0033    0.4845    0.8521
Pt    0.0401    0.2802    0.7609
Pt    0.0386    0.2785    0.7972
Pt    0.0403    0.2801    0.8697
Pt    0.0397    0.3142    0.7976
Pt    0.0397    0.3156    0.8327
Pt    0.0389    0.3163    0.8718
Pt    0.0390    0.3521    0.7965
Pt    0.0392    0.3533    0.8332
Pt    0.0392    0.3522    0.8705
Pt    0.0399    0.3903    0.7955
Pt    0.0398    0.3894    0.8347
Pt    0.0409    0.3896    0.8700
Pt    0.0397    0.4278    0.7587
Pt    0.0407    0.4274    0.7942
Pt    0.0400    0.4286    0.8332
Pt    0.0388    0.4276    0.8713
Pt    0.0410    0.4652    0.7960
Pt    0.0399    0.4650    0.8330
Pt    0.0402    0.4650    0.8727
Pt    0.0767    0.3888    0.7966
Pt    0.0759    0.3895    0.8329
Pt    0.0775    0.4268    0.7969
Pt    0.0784    0.4259    0.8339
Pt    0.0768    0.4637    0.7618
Pt    0.0756    0.4647    0.7967
Pt    0.0773    0.4650    0.8352
Pt    0.1127    0.4253    0.7966
Pt    0.1110    0.4264    0.8344
Pt    0.1119    0.4620    0.7596
Pt    0.1130    0.4628    0.7981
Pt    0.1128    0.4616    0.8335
Pt    0.2420    0.4642    0.8545
Pt    0.1506    0.3899    0.7612
Pt    0.1495    0.4255    0.7596
Pt    0.1492    0.4240    0.7983
Pt    0.1491    0.4265    0.8341
Pt    0.1496    0.4633    0.7607
Pt    0.1485    0.4616    0.7969
Pt    0.1483    0.4624    0.8352
Pt    0.1857    0.2788    0.8719
Pt    0.1852    0.3875    0.7614
Pt    0.1871    0.3878    0.8005
Pt    0.1877    0.3930    0.8757
Pt    0.1874    0.4250    0.7611
Pt    0.1864    0.4239    0.7994
Pt    0.1867    0.4257    0.8350
Pt    0.1858    0.4645    0.7598
Pt    0.1868    0.4645    0.7965
Pt    0.1869    0.4633    0.8358
Pt    0.1849    0.4630    0.8740
Pt    0.2248    0.2788    0.8716
Pt    0.2232    0.3162    0.8708
Pt    0.2237    0.3557    0.8365
Pt    0.2233    0.3542    0.8741
Pt    0.2242    0.3882    0.7622
Pt    0.2246    0.3894    0.7988
Pt    0.2238    0.3886    0.8359
Pt    0.2227    0.3910    0.8734
Pt    0.2233    0.4258    0.7623
Pt    0.2235    0.4253    0.7990
Pt    0.2228    0.4268    0.8368
Pt    0.2249    0.4293    0.8748
Pt    0.2249    0.4625    0.7624
Pt    0.2228    0.4627    0.7982
Pt    0.2232    0.4637    0.8363
Pt    0.0025    0.3897    0.7584
Pt    0.0189    0.2603    0.7599
Pt    0.0214    0.2606    0.7969
Pt    0.0208    0.2604    0.8719
Pt    0.0215    0.2984    0.7603
Pt    0.0204    0.2965    0.7978
Pt    0.0204    0.2975    0.8348
Pt    0.0207    0.2981    0.8724
Pt    0.0228    0.3338    0.7963
Pt    0.0211    0.3354    0.8348
Pt    0.0200    0.3346    0.8719
Pt    0.0205    0.3728    0.7570
Pt    0.0216    0.3725    0.7965
Pt    0.0204    0.3721    0.8331
Pt    0.0211    0.3729    0.8709
Pt    0.0221    0.4086    0.7574
Pt    0.0215    0.4094    0.7948
Pt    0.0219    0.4098    0.8324
Pt    0.0220    0.4086    0.8708
Pt    0.0204    0.4456    0.7566
Pt    0.0215    0.4470    0.7958
Pt    0.0209    0.4463    0.8332
Pt    0.0217    0.4482    0.8716
Pt    0.0220    0.4832    0.7959
Pt    0.0210    0.4835    0.8337
Pt    0.0211    0.4840    0.8724
Pt    0.0587    0.2629    0.7619
Pt    0.0589    0.2990    0.8709
Pt    0.0570    0.3344    0.8341
Pt    0.0600    0.3339    0.8706
Pt    0.0568    0.3707    0.7964
Pt    0.0579    0.3702    0.8341
Pt    0.0603    0.3716    0.8705
Pt    0.0587    0.4082    0.7942
Pt    0.0576    0.4079    0.8323
Pt    0.0596    0.4078    0.8698
Pt    0.0580    0.4458    0.7602
Pt    0.0586    0.4445    0.7940
Pt    0.0591    0.4453    0.8339
Pt    0.0573    0.4449    0.8723
Pt    0.0593    0.4830    0.7944
Pt    0.0581    0.4809    0.8351
Pt    0.0949    0.4068    0.7965
Pt    0.0943    0.4081    0.8321
Pt    0.0942    0.4458    0.7964
Pt    0.0940    0.4441    0.8351
Pt    0.0947    0.4820    0.7974
Pt    0.1341    0.2607    0.7617
Pt    0.1322    0.4077    0.7595
Pt    0.1311    0.4447    0.7592
Pt    0.1312    0.4436    0.7974
Pt    0.1302    0.4440    0.8361
Pt    0.1308    0.4810    0.7618
Pt    0.1302    0.4816    0.7977
Pt    0.1296    0.4806    0.8346
Pt    0.1690    0.2599    0.7625
Pt    0.1689    0.4061    0.7619
Pt    0.1687    0.4055    0.7984
Pt    0.1682    0.4435    0.7601
Pt    0.1683    0.4439    0.7987
Pt    0.1684    0.4448    0.8352
Pt    0.1677    0.4824    0.7604
Pt    0.1670    0.4816    0.7985
Pt    0.1668    0.4820    0.8342
Pt    0.1671    0.4813    0.8710
Pt    0.2050    0.2611    0.8689
Pt    0.2054    0.2970    0.8709
Pt    0.2060    0.3701    0.7630
Pt    0.2058    0.3702    0.7984
Pt    0.2038    0.3731    0.8730
Pt    0.2049    0.4056    0.7617
Pt    0.2055    0.4066    0.8000
Pt    0.2058    0.4078    0.8374
Pt    0.2214    0.5010    0.8715
Pt    0.2053    0.4445    0.7606
Pt    0.2046    0.4444    0.7981
Pt    0.2042    0.4456    0.8365
Pt    0.2046    0.4460    0.8724
Pt    0.2049    0.4828    0.7616
Pt    0.2054    0.4834    0.7989
Pt    0.2047    0.4822    0.8347
Pt    0.2026    0.4817    0.8744
Pt    0.2434    0.2607    0.8714
Pt    0.2420    0.2978    0.8709
Pt    0.2421    0.3354    0.8719
Pt    0.2440    0.3703    0.7613
Pt    0.2434    0.3691    0.7986
Pt    0.2447    0.3713    0.8342
Pt    0.2427    0.3721    0.8732
Pt    0.2425    0.4072    0.7615
Pt    0.2436    0.4077    0.7992
Pt    0.2430    0.4093    0.8363
Pt    0.2424    0.4092    0.8742
Pt    0.2431    0.4442    0.7617
Pt    0.2417    0.4435    0.8001
Pt    0.2422    0.4461    0.8353
Pt    0.2432    0.4482    0.8757
Pt    0.2424    0.4824    0.7621
Pt    0.2418    0.4813    0.7983
Pt    0.2415    0.4824    0.8360
Pt    0.2414    0.4839    0.8719
Pt    0.0195    0.2786    0.7789
Pt    0.0211    0.2773    0.8173
Pt    0.0217    0.2790    0.8524
Pt    0.0215    0.3150    0.7790
Pt    0.0210    0.3165    0.8160
Pt    0.0212    0.3163    0.8515
Pt    0.0211    0.3530    0.7771
Pt    0.0209    0.3535    0.8147
Pt    0.0220    0.3532    0.8529
Pt    0.0205    0.3906    0.7758
Pt    0.0217    0.3910    0.8143
Pt    0.0207    0.3918    0.8522
Pt    0.0217    0.4269    0.7760
Pt    0.0225    0.4283    0.8137
Pt    0.0214    0.4285    0.8519
Pt    0.0215    0.4656    0.7774
Pt    0.0213    0.4656    0.8137
Pt    0.0212    0.4656    0.8531
Pt    0.0575    0.3528    0.8527
Pt    0.0574    0.3880    0.7771
Pt    0.0573    0.3887    0.8139
Pt    0.0596    0.3895    0.8525
Pt    0.0594    0.4253    0.7751
Pt    0.0598    0.4263    0.8154
Pt    0.0579    0.4277    0.8514
Pt    0.0578    0.4650    0.7772
Pt    0.0584    0.4648    0.8152
Pt    0.0581    0.4640    0.8538
Pt    0.0955    0.4260    0.7782
Pt    0.0941    0.4260    0.8150
Pt    0.0958    0.4633    0.7785
Pt    0.0940    0.4637    0.8165
Pt    0.1312    0.4257    0.7783
Pt    0.1289    0.4231    0.8179
Pt    0.1300    0.4627    0.7776
Pt    0.1318    0.4631    0.8160
Pt    0.1674    0.3878    0.7810
Pt    0.1689    0.4253    0.7789
Pt    0.1687    0.4258    0.8166
Pt    0.1673    0.4628    0.7793
Pt    0.1677    0.4633    0.8167
Pt    0.1664    0.4624    0.8530
Pt    0.2067    0.3562    0.8548
Pt    0.2064    0.3885    0.7816
Pt    0.2056    0.3872    0.8174
Pt    0.2034    0.3907    0.8550
Pt    0.2050    0.4251    0.7797
Pt    0.2056    0.4256    0.8180
Pt    0.2054    0.4275    0.8552
Pt    0.2049    0.4639    0.7783
Pt    0.2045    0.4632    0.8163
Pt    0.2038    0.4636    0.8554
Pt    0.2417    0.3543    0.8527
Pt    0.2429    0.3885    0.7811
Pt    0.2436    0.3892    0.8172
Pt    0.2428    0.3917    0.8542
Pt    0.2427    0.4259    0.7802
Pt    0.0034    0.2576    0.8176
Pt    0.0020    0.3720    0.7772
Pt    0.0020    0.3347    0.8521
Pt    0.0030    0.3727    0.8536
Pt    0.0032    0.4660    0.8721
Pt    0.0038    0.2585    0.8529
Pt    0.0034    0.4859    0.7769
Pt    0.0025    0.2776    0.8711
Pt    0.2244    0.5008    0.7621
Pt    0.1483    0.4998    0.7987
Pt    0.0036    0.4264    0.7584
Pt    0.1663    0.4998    0.8538
Pt    0.1865    0.5008    0.7614
Pt    0.2033    0.5003    0.8536
Pt    0.1684    0.5006    0.7802
Pt    0.1490    0.4998    0.7612
Pt    0.1482    0.2594    0.9995
Pt    0.0033    0.3542    0.9093
Pt    0.0031    0.3907    0.9842
Pt    0.0023    0.2966    0.8895
Pt    0.0033    0.4452    0.9269
Pt    0.0028    0.4082    0.9640
Pt    0.1671    0.2784    0.0011
Pt    0.0572    0.4997    0.0002
Pt    0.0211    0.4628    0.9993
Pt    0.0038    0.2770    0.9465
Pt    0.0035    0.4082    0.8894
Pt    0.0026    0.4468    0.8897
Pt    0.0042    0.3531    0.9461
Pt    0.0026    0.4086    0.9274
Pt    0.2428    0.2789    0.0010
Pt    0.0022    0.3153    0.9088
Pt    0.0027    0.2599    0.9653
Pt    0.0033    0.4270    0.9839
Pt    0.0036    0.3732    0.9655
Pt    0.0043    0.3345    0.9664
Pt    0.0025    0.3900    0.9083
Pt    0.0397    0.2582    0.9284
Pt    0.0388    0.2966    0.8893
Pt    0.0397    0.2967    0.9295
Pt    0.0403    0.2973    0.9643
Pt    0.0398    0.3341    0.8892
Pt    0.0392    0.3344    0.9274
Pt    0.0398    0.3348    0.9664
Pt    0.0409    0.3720    0.8887
Pt    0.0416    0.3722    0.9264
Pt    0.0414    0.3725    0.9670
Pt    0.0424    0.4080    0.8892
Pt    0.0398    0.4080    0.9262
Pt    0.0398    0.4451    0.8900
Pt    0.0421    0.4444    0.9270
Pt    0.0393    0.4449    0.9647
Pt    0.0387    0.4837    0.9626
Pt    0.0804    0.2600    0.9621
Pt    0.0760    0.2987    0.8902
Pt    0.0761    0.2961    0.9269
Pt    0.0762    0.2974    0.9637
Pt    0.0784    0.3338    0.8887
Pt    0.0766    0.3354    0.9270
Pt    0.0751    0.3343    0.9649
Pt    0.1105    0.2595    0.9649
Pt    0.1121    0.2977    0.9248
Pt    0.1117    0.2975    0.9628
Pt    0.1127    0.3352    0.9266
Pt    0.1129    0.3346    0.9646
Pt    0.1501    0.2598    0.8896
Pt    0.1472    0.2608    0.9269
Pt    0.1471    0.2587    0.9637
Pt    0.1475    0.2967    0.9247
Pt    0.1469    0.2971    0.9623
Pt    0.1489    0.3345    0.9260
Pt    0.1482    0.3352    0.9624
Pt    0.1843    0.2597    0.8890
Pt    0.1853    0.2596    0.9263
Pt    0.1856    0.2596    0.9630
Pt    0.1854    0.2980    0.8898
Pt    0.1853    0.2967    0.9268
Pt    0.1860    0.2955    0.9646
Pt    0.1852    0.3352    0.9275
Pt    0.1867    0.3357    0.9648
Pt    0.1881    0.3728    0.8918
Pt    0.1854    0.3726    0.9637
Pt    0.2241    0.2615    0.8901
Pt    0.2244    0.2614    0.9261
Pt    0.2233    0.2597    0.9629
Pt    0.2228    0.2982    0.8891
Pt    0.2237    0.2977    0.9271
Pt    0.2246    0.2973    0.9638
Pt    0.2228    0.3349    0.8899
Pt    0.2238    0.3347    0.9282
Pt    0.2240    0.3343    0.9655
Pt    0.2232    0.3723    0.8916
Pt    0.2246    0.3716    0.9281
Pt    0.2231    0.3728    0.9661
Pt    0.2235    0.4103    0.8930
Pt    0.2305    0.4926    0.8925
Pt    0.0026    0.4827    0.9630
Pt    0.0038    0.4645    0.9087
Pt    0.1493    0.2986    0.8898
Pt    0.1472    0.4785    0.9995
Pt    0.2036    0.5004    0.8913
Pt    0.0034    0.2771    0.9848
Pt    0.0014    0.4821    0.0011
Pt    0.0016    0.2778    0.9093
Pt    0.0036    0.3720    0.8904
Pt    0.1486    0.4999    0.9802
Pt    0.0024    0.3716    0.9284
Pt    0.0039    0.2957    0.9666
Pt    0.0029    0.4273    0.9081
Pt    0.0040    0.4261    0.9451
Pt    0.1309    0.4985    0.9994
Pt    0.0032    0.3902    0.9457
Pt    0.1672    0.3161    0.9991
Pt    0.0044    0.4846    0.9256
Pt    0.0393    0.2775    0.9079
Pt    0.0396    0.2778    0.9467
Pt    0.0398    0.3145    0.9092
Pt    0.0405    0.3168    0.9472
Pt    0.0407    0.3148    0.9849
Pt    0.0416    0.3536    0.9086
Pt    0.0399    0.3537    0.9472
Pt    0.0387    0.3522    0.9853
Pt    0.0423    0.3895    0.9075
Pt    0.0411    0.3903    0.9453
Pt    0.0410    0.4259    0.9080
Pt    0.0418    0.4264    0.9439
Pt    0.0380    0.4648    0.9459
Pt    0.0390    0.4651    0.9813
Pt    0.0754    0.2799    0.9073
Pt    0.0789    0.2767    0.9439
Pt    0.0762    0.2783    0.9818
Pt    0.0762    0.3176    0.9091
Pt    0.0762    0.3169    0.9452
Pt    0.0757    0.3148    0.9835
Pt    0.0769    0.3519    0.9060
Pt    0.0768    0.3539    0.9470
Pt    0.1299    0.2970    0.9056
Pt    0.1107    0.2784    0.9451
Pt    0.1115    0.2771    0.9846
Pt    0.1123    0.3165    0.9445
Pt    0.1119    0.3157    0.9829
Pt    0.1475    0.2784    0.9076
Pt    0.1475    0.2797    0.9454
Pt    0.1471    0.2792    0.9825
Pt    0.1497    0.3171    0.9075
Pt    0.1478    0.3158    0.9439
Pt    0.1475    0.3144    0.9821
Pt    0.1486    0.3523    0.9815
Pt    0.1854    0.2794    0.9072
Pt    0.1850    0.2783    0.9450
Pt    0.1857    0.2774    0.9829
Pt    0.1856    0.3161    0.9080
Pt    0.1858    0.3154    0.9454
Pt    0.1845    0.3158    0.9817
Pt    0.1876    0.3552    0.9103
Pt    0.1861    0.3545    0.9457
Pt    0.1854    0.3537    0.9834
Pt    0.2237    0.2802    0.9081
Pt    0.2234    0.2797    0.9445
Pt    0.2238    0.2777    0.9827
Pt    0.2232    0.3172    0.9087
Pt    0.2233    0.3166    0.9455
Pt    0.2233    0.3153    0.9830
Pt    0.2221    0.3528    0.9084
Pt    0.2220    0.3533    0.9465
Pt    0.2238    0.3525    0.9835
Pt    0.2241    0.3906    0.9099
Pt    0.2261    0.3896    0.9865
Pt    0.0229    0.2581    0.9080
Pt    0.0219    0.2599    0.9465
Pt    0.0203    0.2977    0.9088
Pt    0.0211    0.2967    0.9474
Pt    0.0221    0.2966    0.9838
Pt    0.0213    0.3341    0.9097
Pt    0.0222    0.3355    0.9476
Pt    0.0198    0.3352    0.9856
Pt    0.0227    0.3726    0.9086
Pt    0.0212    0.3719    0.9467
Pt    0.0213    0.3721    0.9849
Pt    0.0218    0.4074    0.9082
Pt    0.0227    0.4097    0.9448
Pt    0.0212    0.4091    0.9817
Pt    0.0216    0.4463    0.9082
Pt    0.0214    0.4454    0.9448
Pt    0.0206    0.4446    0.9825
Pt    0.0211    0.4841    0.9080
Pt    0.0222    0.4843    0.9441
Pt    0.0200    0.4828    0.9813
Pt    0.0590    0.2611    0.9451
Pt    0.0564    0.2973    0.9084
Pt    0.0590    0.2967    0.9456
Pt    0.0587    0.2961    0.9825
Pt    0.0572    0.3341    0.9078
Pt    0.0576    0.3352    0.9461
Pt    0.0585    0.3352    0.9837
Pt    0.0607    0.3721    0.9086
Pt    0.0584    0.3713    0.9468
Pt    0.0574    0.4082    0.9086
Pt    0.0942    0.2983    0.9077
Pt    0.0936    0.2979    0.9451
Pt    0.0945    0.2975    0.9826
Pt    0.0953    0.3337    0.9073
Pt    0.0956    0.3366    0.9456
Pt    0.1308    0.2588    0.9080
Pt    0.1275    0.2593    0.9439
Pt    0.1295    0.2587    0.9823
Pt    0.1297    0.2974    0.9428
Pt    0.1282    0.2966    0.9816
Pt    0.1302    0.3358    0.9445
Pt    0.1312    0.3329    0.9819
Pt    0.1660    0.2589    0.9089
Pt    0.1658    0.2605    0.9442
Pt    0.1668    0.2597    0.9819
Pt    0.1666    0.2977    0.9066
Pt    0.1675    0.2974    0.9455
Pt    0.1672    0.2970    0.9823
Pt    0.1675    0.3351    0.9450
Pt    0.1665    0.3348    0.9800
Pt    0.1672    0.3711    0.9841
Pt    0.2040    0.2610    0.9073
Pt    0.2044    0.2602    0.9443
Pt    0.2045    0.2597    0.9834
Pt    0.2051    0.2977    0.9083
Pt    0.2039    0.2973    0.9455
Pt    0.2038    0.2963    0.9830
Pt    0.2039    0.3351    0.9086
Pt    0.2045    0.3342    0.9460
Pt    0.2042    0.3348    0.9829
Pt    0.2060    0.3729    0.9112
Pt    0.2051    0.3730    0.9471
Pt    0.2044    0.3718    0.9827
Pt    0.2432    0.2617    0.9076
Pt    0.2416    0.2599    0.9452
Pt    0.2414    0.2598    0.9825
Pt    0.2418    0.2988    0.9072
Pt    0.2428    0.2974    0.9459
Pt    0.2425    0.2972    0.9827
Pt    0.2424    0.3350    0.9094
Pt    0.2434    0.3344    0.9467
Pt    0.2439    0.3341    0.9823
Pt    0.2446    0.3720    0.9099
Pt    0.2413    0.3733    0.9464
Pt    0.2416    0.3708    0.9829
Pt    0.2438    0.4089    0.9096
Pt    0.0217    0.2771    0.8893
Pt    0.0229    0.2784    0.9265
Pt    0.0222    0.2775    0.9655
Pt    0.0197    0.3160    0.8907
Pt    0.0217    0.3149    0.9278
Pt    0.0225    0.3158    0.9667
Pt    0.0208    0.3529    0.8900
Pt    0.0219    0.3543    0.9270
Pt    0.0224    0.3536    0.9656
Pt    0.0241    0.3905    0.8894
Pt    0.0216    0.3901    0.9284
Pt    0.0230    0.3906    0.9644
Pt    0.0221    0.4273    0.8897
Pt    0.0219    0.4273    0.9254
Pt    0.0234    0.4270    0.9634
Pt    0.0230    0.4658    0.8906
Pt    0.0223    0.4646    0.9253
Pt    0.0210    0.4636    0.9642
Pt    0.0566    0.2795    0.8897
Pt    0.0577    0.2777    0.9262
Pt    0.0606    0.2785    0.9636
Pt    0.0586    0.3169    0.8883
Pt    0.0578    0.3170    0.9273
Pt    0.0587    0.3153    0.9656
Pt    0.0575    0.3532    0.8892
Pt    0.0611    0.3540    0.9263
Pt    0.0577    0.3527    0.9658
Pt    0.0602    0.3896    0.8887
Pt    0.0953    0.2786    0.9253
Pt    0.0949    0.2789    0.9653
Pt    0.0943    0.3169    0.9267
Pt    0.0941    0.3167    0.9641
Pt    0.1288    0.2786    0.9243
Pt    0.1284    0.2775    0.9638
Pt    0.1292    0.3179    0.9238
Pt    0.1292    0.3152    0.9628
Pt    0.1668    0.2792    0.8895
Pt    0.1663    0.2783    0.9266
Pt    0.1658    0.2775    0.9639
Pt    0.1669    0.3159    0.9266
Pt    0.1664    0.3156    0.9625
Pt    0.1678    0.3551    0.9633
Pt    0.2046    0.2789    0.8890
Pt    0.2045    0.2798    0.9260
Pt    0.2058    0.2788    0.9625
Pt    0.2043    0.3170    0.8897
Pt    0.2043    0.3167    0.9268
Pt    0.2043    0.3161    0.9636
Pt    0.2034    0.3518    0.8897
Pt    0.2047    0.3543    0.9289
Pt    0.2053    0.3537    0.9654
Pt    0.2052    0.3913    0.8929
Pt    0.2444    0.2804    0.8889
Pt    0.2432    0.2795    0.9260
Pt    0.2427    0.2781    0.9641
Pt    0.2421    0.3160    0.8889
Pt    0.2438    0.3159    0.9275
Pt    0.2428    0.3155    0.9644
Pt    0.2433    0.3536    0.8916
Pt    0.2417    0.3527    0.9279
Pt    0.2413    0.3537    0.9632
Pt    0.2433    0.3910    0.8921
Pt    0.2436    0.3912    0.9272
Pt    0.2403    0.3912    0.9642
Pt    0.2443    0.4281    0.8914
Pt    0.2389    0.4670    0.8918
Pt    0.0030    0.2593    0.9269
Pt    0.0039    0.4654    0.9441
Pt    0.0036    0.3154    0.9857
Pt    0.0016    0.2602    0.8909
Pt    0.0039    0.4849    0.8904
Pt    0.1676    0.4972    0.9987
Pt    0.0023    0.2964    0.9282
Pt    0.0027    0.3340    0.9277
Pt    0.0042    0.3163    0.9474
Pt    0.0020    0.4449    0.9629
Pt    0.0021    0.4640    0.9823
Pt    0.2428    0.3157    0.0009
Pt    0.0037    0.3548    0.9847
Pt    0.1854    0.3348    0.0005
Pt    0.0202    0.5002    0.0007
Pt    0.2057    0.4997    0.9985
Pt    0.1492    0.3338    0.0005
Pt    0.0390    0.4827    0.9999
Pt    0.2057    0.3893    0.0005
Pt    0.2054    0.4113    0.8765
Pt    0.2439    0.7257    0.1129
Pt    0.2438    0.7240    0.0753
Pt    0.2422    0.7237    0.0380
Pt    0.1309    0.6498    0.1124
Pt    0.2426    0.6868    0.1122
Pt    0.2433    0.6859    0.0747
Pt    0.2451    0.6858    0.0380
Pt    0.1308    0.6499    0.0748
Pt    0.2432    0.6500    0.1121
Pt    0.2432    0.6482    0.0737
Pt    0.2435    0.6494    0.0365
Pt    0.1310    0.6501    0.0380
Pt    0.2442    0.6123    0.1117
Pt    0.2438    0.6124    0.0749
Pt    0.2426    0.6118    0.0365
Pt    0.1313    0.6124    0.1119
Pt    0.2425    0.5747    0.1116
Pt    0.2436    0.5737    0.0736
Pt    0.2421    0.5731    0.0361
Pt    0.1287    0.6124    0.0747
Pt    0.2420    0.5357    0.1118
Pt    0.2436    0.5379    0.0732
Pt    0.2411    0.5373    0.0365
Pt    0.1294    0.6114    0.0378
Pt    0.1307    0.5774    0.1115
Pt    0.2063    0.5369    0.1116
Pt    0.1303    0.5745    0.0736
Pt    0.0381    0.5191    0.0367
Pt    0.0369    0.5175    0.0753
Pt    0.0368    0.5184    0.1131
Pt    0.1306    0.5742    0.0355
Pt    0.0375    0.5567    0.0382
Pt    0.0370    0.5566    0.0732
Pt    0.0369    0.5563    0.1127
Pt    0.1316    0.5373    0.1104
Pt    0.0358    0.5948    0.0354
Pt    0.0374    0.5936    0.0750
Pt    0.0364    0.5930    0.1116
Pt    0.1301    0.5374    0.0742
Pt    0.0370    0.6312    0.0378
Pt    0.0358    0.6303    0.0754
Pt    0.0379    0.6295    0.1121
Pt    0.1302    0.5355    0.0359
Pt    0.0369    0.6689    0.0350
Pt    0.0356    0.6686    0.0743
Pt    0.0382    0.6699    0.1122
Pt    0.1303    0.6879    0.0370
Pt    0.0358    0.7057    0.0362
Pt    0.0366    0.7059    0.0752
Pt    0.0383    0.7066    0.1119
Pt    0.1305    0.6876    0.0741
Pt    0.0371    0.7432    0.0367
Pt    0.0370    0.7416    0.0753
Pt    0.0353    0.7448    0.1139
Pt    0.1310    0.6871    0.1126
Pt    0.0738    0.5182    0.0362
Pt    0.0744    0.5184    0.0745
Pt    0.0740    0.5186    0.1124
Pt    0.0931    0.7239    0.1114
Pt    0.0740    0.5559    0.0378
Pt    0.0745    0.5553    0.0751
Pt    0.0749    0.5554    0.1127
Pt    0.0939    0.7249    0.0742
Pt    0.0762    0.5944    0.0361
Pt    0.0753    0.5939    0.0750
Pt    0.0749    0.5925    0.1121
Pt    0.0935    0.7250    0.0349
Pt    0.0744    0.6301    0.0362
Pt    0.0739    0.6312    0.0742
Pt    0.0746    0.6302    0.1121
Pt    0.0932    0.6883    0.1110
Pt    0.0734    0.6681    0.0363
Pt    0.0745    0.6683    0.0733
Pt    0.0742    0.6680    0.1124
Pt    0.0930    0.6859    0.0749
Pt    0.0750    0.7075    0.0357
Pt    0.0736    0.7041    0.0733
Pt    0.0754    0.7052    0.1104
Pt    0.0931    0.6866    0.0364
Pt    0.0737    0.7426    0.0356
Pt    0.0747    0.7422    0.0734
Pt    0.0736    0.7432    0.1124
Pt    0.0935    0.6494    0.1121
Pt    0.1117    0.5177    0.0350
Pt    0.1120    0.5180    0.0729
Pt    0.1124    0.5193    0.1116
Pt    0.0927    0.6503    0.0741
Pt    0.1116    0.5551    0.0362
Pt    0.1119    0.5550    0.0752
Pt    0.1117    0.5555    0.1125
Pt    0.0927    0.6493    0.0359
Pt    0.1104    0.5926    0.0364
Pt    0.1124    0.5923    0.0738
Pt    0.1124    0.5941    0.1110
Pt    0.0933    0.6126    0.1131
Pt    0.1123    0.6324    0.0366
Pt    0.1115    0.6315    0.0747
Pt    0.1125    0.6306    0.1105
Pt    0.0924    0.6126    0.0752
Pt    0.1116    0.6685    0.0354
Pt    0.1122    0.6688    0.0751
Pt    0.1110    0.6679    0.1127
Pt    0.0925    0.6129    0.0376
Pt    0.1114    0.7052    0.0373
Pt    0.1120    0.7063    0.0739
Pt    0.1123    0.7053    0.1121
Pt    0.0934    0.5746    0.1118
Pt    0.1120    0.7425    0.0368
Pt    0.1112    0.7422    0.0738
Pt    0.1114    0.7432    0.1121
Pt    0.0947    0.5743    0.0746
Pt    0.1491    0.5161    0.0358
Pt    0.1490    0.5171    0.0737
Pt    0.1486    0.5182    0.1115
Pt    0.0925    0.5743    0.0372
Pt    0.1487    0.5552    0.0363
Pt    0.1483    0.5564    0.0744
Pt    0.1507    0.5575    0.1113
Pt    0.0929    0.5371    0.1135
Pt    0.1489    0.5929    0.0367
Pt    0.1483    0.5932    0.0727
Pt    0.1503    0.5944    0.1114
Pt    0.0928    0.5370    0.0757
Pt    0.1478    0.6306    0.0367
Pt    0.1490    0.6319    0.0753
Pt    0.1483    0.6312    0.1119
Pt    0.0935    0.5374    0.0358
Pt    0.1483    0.6683    0.0363
Pt    0.1480    0.6682    0.0748
Pt    0.1500    0.6690    0.1124
Pt    0.1309    0.7247    0.0368
Pt    0.1484    0.7051    0.0376
Pt    0.1497    0.7057    0.0754
Pt    0.1496    0.7050    0.1122
Pt    0.1310    0.7242    0.0757
Pt    0.1500    0.7437    0.0368
Pt    0.1497    0.7436    0.0753
Pt    0.1503    0.7419    0.1121
Pt    0.1315    0.7244    0.1127
Pt    0.1870    0.5171    0.0357
Pt    0.1873    0.5184    0.0731
Pt    0.1874    0.5192    0.1116
Pt    0.0558    0.7252    0.1132
Pt    0.1863    0.5559    0.0359
Pt    0.1864    0.5549    0.0733
Pt    0.1862    0.5570    0.1107
Pt    0.0561    0.7226    0.0736
Pt    0.1864    0.5931    0.0361
Pt    0.1871    0.5927    0.0738
Pt    0.1872    0.5934    0.1119
Pt    0.0555    0.7244    0.0368
Pt    0.1862    0.6303    0.0378
Pt    0.1871    0.6300    0.0733
Pt    0.1863    0.6308    0.1104
Pt    0.0569    0.6876    0.1118
Pt    0.1862    0.6672    0.0385
Pt    0.1872    0.6666    0.0759
Pt    0.1862    0.6682    0.1112
Pt    0.0543    0.6868    0.0732
Pt    0.1866    0.7049    0.0380
Pt    0.1885    0.7046    0.0751
Pt    0.1879    0.7067    0.1131
Pt    0.0556    0.6880    0.0356
Pt    0.1862    0.7438    0.0395
Pt    0.1870    0.7437    0.0752
Pt    0.1863    0.7429    0.1117
Pt    0.0563    0.6494    0.1125
Pt    0.2257    0.5172    0.0348
Pt    0.2252    0.5178    0.0732
Pt    0.2242    0.5178    0.1103
Pt    0.0560    0.6486    0.0748
Pt    0.2234    0.5547    0.0352
Pt    0.2242    0.5555    0.0739
Pt    0.2244    0.5552    0.1116
Pt    0.0552    0.6494    0.0369
Pt    0.2236    0.5933    0.0361
Pt    0.2242    0.5931    0.0738
Pt    0.2246    0.5937    0.1117
Pt    0.0563    0.6115    0.1126
Pt    0.2242    0.6318    0.0366
Pt    0.2241    0.6305    0.0732
Pt    0.2254    0.6302    0.1115
Pt    0.0550    0.6110    0.0748
Pt    0.2246    0.6670    0.0366
Pt    0.2252    0.6670    0.0729
Pt    0.2238    0.6679    0.1127
Pt    0.0552    0.6132    0.0359
Pt    0.2248    0.7044    0.0379
Pt    0.2254    0.7058    0.0739
Pt    0.2254    0.7060    0.1125
Pt    0.0549    0.5743    0.1112
Pt    0.2239    0.7429    0.0391
Pt    0.2264    0.7433    0.0763
Pt    0.2249    0.7435    0.1134
Pt    0.2050    0.5361    0.0718
Pt    0.2055    0.7251    0.1130
Pt    0.2070    0.7231    0.0756
Pt    0.2055    0.7239    0.0373
Pt    0.0562    0.5758    0.0726
Pt    0.2068    0.6875    0.1124
Pt    0.2071    0.6854    0.0745
Pt    0.2055    0.6861    0.0378
Pt    0.0565    0.5758    0.0384
Pt    0.2062    0.6490    0.1126
Pt    0.2055    0.6489    0.0739
Pt    0.2052    0.6502    0.0365
Pt    0.0558    0.5371    0.1128
Pt    0.2048    0.6115    0.1111
Pt    0.2054    0.6108    0.0740
Pt    0.2067    0.6120    0.0367
Pt    0.0559    0.5375    0.0743
Pt    0.2059    0.5740    0.1110
Pt    0.2063    0.5737    0.0732
Pt    0.2055    0.5734    0.0366
Pt    0.2049    0.5370    0.0355
Pt    0.0553    0.5366    0.0362
Pt    0.1693    0.7245    0.1126
Pt    0.0368    0.5388    0.0182
Pt    0.0366    0.5382    0.0570
Pt    0.0372    0.5388    0.0934
Pt    0.0354    0.5742    0.0178
Pt    0.0383    0.5766    0.0552
Pt    0.0386    0.5752    0.0911
Pt    0.0360    0.6120    0.0171
Pt    0.0365    0.6121    0.0557
Pt    0.0368    0.6114    0.0933
Pt    0.0364    0.6492    0.0168
Pt    0.0372    0.6501    0.0561
Pt    0.0376    0.6484    0.0937
Pt    0.0358    0.6871    0.0168
Pt    0.0359    0.6862    0.0548
Pt    0.0370    0.6861    0.0929
Pt    0.0364    0.7256    0.0176
Pt    0.0375    0.7240    0.0556
Pt    0.0369    0.7245    0.0942
Pt    0.1676    0.7242    0.0740
Pt    0.1683    0.7243    0.0375
Pt    0.1674    0.5366    0.0367
Pt    0.0743    0.5375    0.0191
Pt    0.0750    0.5364    0.0544
Pt    0.0732    0.5362    0.0935
Pt    0.0748    0.5749    0.0188
Pt    0.0756    0.5737    0.0560
Pt    0.0745    0.5737    0.0928
Pt    0.0749    0.6128    0.0170
Pt    0.0733    0.6113    0.0559
Pt    0.0751    0.6118    0.0935
Pt    0.0741    0.6497    0.0181
Pt    0.0742    0.6485    0.0555
Pt    0.0744    0.6492    0.0925
Pt    0.0739    0.6866    0.0190
Pt    0.0744    0.6865    0.0545
Pt    0.0740    0.6871    0.0919
Pt    0.0746    0.7253    0.0161
Pt    0.0750    0.7257    0.0549
Pt    0.0748    0.7239    0.0927
Pt    0.1688    0.6864    0.1114
Pt    0.1677    0.6871    0.0739
Pt    0.1679    0.6873    0.0368
Pt    0.1112    0.5361    0.0180
Pt    0.1130    0.5368    0.0552
Pt    0.1117    0.5363    0.0939
Pt    0.1116    0.5737    0.0195
Pt    0.1117    0.5739    0.0549
Pt    0.1121    0.5741    0.0932
Pt    0.1116    0.6127    0.0189
Pt    0.1117    0.6111    0.0564
Pt    0.1106    0.6113    0.0927
Pt    0.1129    0.6491    0.0169
Pt    0.1116    0.6507    0.0565
Pt    0.1118    0.6493    0.0937
Pt    0.1130    0.6873    0.0174
Pt    0.1103    0.6876    0.0558
Pt    0.1122    0.6863    0.0925
Pt    0.1132    0.7258    0.0168
Pt    0.1124    0.7240    0.0548
Pt    0.1124    0.7240    0.0949
Pt    0.1680    0.5374    0.0746
Pt    0.1687    0.6502    0.1119
Pt    0.1673    0.6495    0.0742
Pt    0.1497    0.5354    0.0178
Pt    0.1489    0.5368    0.0554
Pt    0.1491    0.5369    0.0926
Pt    0.1488    0.5734    0.0189
Pt    0.1485    0.5753    0.0553
Pt    0.1495    0.5761    0.0931
Pt    0.1500    0.6120    0.0181
Pt    0.1496    0.6125    0.0557
Pt    0.1491    0.6122    0.0932
Pt    0.1492    0.6500    0.0185
Pt    0.1481    0.6503    0.0551
Pt    0.1495    0.6496    0.0935
Pt    0.1501    0.6871    0.0176
Pt    0.1491    0.6867    0.0557
Pt    0.1496    0.6872    0.0935
Pt    0.1495    0.7240    0.0189
Pt    0.1496    0.7249    0.0545
Pt    0.1497    0.7243    0.0937
Pt    0.1675    0.6486    0.0375
Pt    0.1676    0.5378    0.1107
Pt    0.1684    0.6121    0.1130
Pt    0.1869    0.5362    0.0178
Pt    0.1855    0.5380    0.0550
Pt    0.1876    0.5370    0.0925
Pt    0.1863    0.5746    0.0179
Pt    0.1869    0.5736    0.0552
Pt    0.1875    0.5750    0.0922
Pt    0.1869    0.6119    0.0192
Pt    0.1875    0.6114    0.0559
Pt    0.1867    0.6118    0.0931
Pt    0.1872    0.6487    0.0188
Pt    0.1867    0.6496    0.0562
Pt    0.1869    0.6488    0.0930
Pt    0.1858    0.6857    0.0181
Pt    0.1866    0.6869    0.0563
Pt    0.1874    0.6883    0.0938
Pt    0.1870    0.7232    0.0190
Pt    0.1875    0.7238    0.0569
Pt    0.1869    0.7241    0.0925
Pt    0.1685    0.6110    0.0750
Pt    0.1669    0.6116    0.0366
Pt    0.0179    0.7244    0.1131
Pt    0.2236    0.5361    0.0171
Pt    0.2241    0.5360    0.0542
Pt    0.2236    0.5371    0.0931
Pt    0.2247    0.5740    0.0169
Pt    0.2234    0.5724    0.0552
Pt    0.2247    0.5740    0.0926
Pt    0.2254    0.6126    0.0185
Pt    0.2247    0.6114    0.0568
Pt    0.2245    0.6113    0.0936
Pt    0.2251    0.6504    0.0169
Pt    0.2251    0.6492    0.0550
Pt    0.2248    0.6487    0.0916
Pt    0.2238    0.6854    0.0185
Pt    0.2248    0.6858    0.0561
Pt    0.2243    0.6863    0.0921
Pt    0.2231    0.7247    0.0205
Pt    0.2241    0.7236    0.0563
Pt    0.2236    0.7248    0.0946
Pt    0.0202    0.5191    0.0204
Pt    0.0195    0.5185    0.0575
Pt    0.0182    0.5185    0.0948
Pt    0.0173    0.5564    0.0196
Pt    0.0187    0.5565    0.0551
Pt    0.0182    0.5561    0.0934
Pt    0.0152    0.5931    0.0174
Pt    0.0183    0.5932    0.0566
Pt    0.0169    0.5919    0.0927
Pt    0.0184    0.6304    0.0196
Pt    0.0177    0.6317    0.0556
Pt    0.0177    0.6295    0.0926
Pt    0.0185    0.6679    0.0180
Pt    0.0181    0.6681    0.0549
Pt    0.0184    0.6669    0.0950
Pt    0.0166    0.7070    0.0187
Pt    0.0185    0.7058    0.0561
Pt    0.0200    0.7050    0.0935
Pt    0.0173    0.7426    0.0181
Pt    0.0189    0.7421    0.0570
Pt    0.0175    0.7419    0.0943
Pt    0.0570    0.5179    0.0177
Pt    0.0568    0.5182    0.0562
Pt    0.0544    0.5171    0.0948
Pt    0.0564    0.5563    0.0186
Pt    0.0561    0.5553    0.0558
Pt    0.0552    0.5556    0.0931
Pt    0.0550    0.5927    0.0185
Pt    0.0563    0.5934    0.0553
Pt    0.0568    0.5924    0.0928
Pt    0.0549    0.6313    0.0171
Pt    0.0546    0.6301    0.0566
Pt    0.0569    0.6297    0.0937
Pt    0.0557    0.6678    0.0168
Pt    0.0554    0.6677    0.0559
Pt    0.0555    0.6684    0.0911
Pt    0.0550    0.7069    0.0177
Pt    0.0547    0.7052    0.0541
Pt    0.0563    0.7048    0.0939
Pt    0.0558    0.7446    0.0170
Pt    0.0551    0.7430    0.0553
Pt    0.0559    0.7419    0.0931
Pt    0.0924    0.5176    0.0177
Pt    0.0938    0.5182    0.0553
Pt    0.0925    0.5181    0.0939
Pt    0.0922    0.5558    0.0184
Pt    0.0944    0.5550    0.0559
Pt    0.0928    0.5556    0.0941
Pt    0.0939    0.5938    0.0173
Pt    0.0930    0.5940    0.0555
Pt    0.0934    0.5935    0.0937
Pt    0.0927    0.6316    0.0176
Pt    0.0941    0.6304    0.0553
Pt    0.0927    0.6310    0.0934
Pt    0.0935    0.6681    0.0173
Pt    0.0923    0.6676    0.0548
Pt    0.0921    0.6675    0.0943
Pt    0.0935    0.7065    0.0176
Pt    0.0918    0.7052    0.0560
Pt    0.0940    0.7045    0.0920
Pt    0.0948    0.7440    0.0176
Pt    0.0930    0.7432    0.0543
Pt    0.0930    0.7416    0.0938
Pt    0.1305    0.5179    0.0164
Pt    0.1303    0.5175    0.0550
Pt    0.1312    0.5182    0.0921
Pt    0.1311    0.5544    0.0176
Pt    0.1311    0.5555    0.0542
Pt    0.1305    0.5569    0.0946
Pt    0.1304    0.5932    0.0181
Pt    0.1295    0.5922    0.0550
Pt    0.1309    0.5950    0.0925
Pt    0.1306    0.6298    0.0176
Pt    0.1294    0.6319    0.0553
Pt    0.1312    0.6313    0.0928
Pt    0.1302    0.6681    0.0182
Pt    0.1294    0.6695    0.0546
Pt    0.1305    0.6688    0.0945
Pt    0.1299    0.7062    0.0189
Pt    0.1315    0.7060    0.0563
Pt    0.1301    0.7050    0.0939
Pt    0.1310    0.7441    0.0179
Pt    0.1307    0.7423    0.0567
Pt    0.1302    0.7428    0.0945
Pt    0.1677    0.5177    0.0181
Pt    0.1684    0.5179    0.0557
Pt    0.1675    0.5191    0.0929
Pt    0.1682    0.5551    0.0179
Pt    0.1670    0.5558    0.0551
Pt    0.1677    0.5558    0.0927
Pt    0.1682    0.5940    0.0183
Pt    0.1680    0.5934    0.0548
Pt    0.1675    0.5927    0.0927
Pt    0.1690    0.6308    0.0172
Pt    0.1682    0.6302    0.0558
Pt    0.1681    0.6298    0.0921
Pt    0.1681    0.6674    0.0188
Pt    0.1683    0.6684    0.0567
Pt    0.1668    0.6680    0.0930
Pt    0.1678    0.7055    0.0179
Pt    0.1681    0.7065    0.0551
Pt    0.1694    0.7055    0.0939
Pt    0.1672    0.7430    0.0187
Pt    0.1671    0.7431    0.0571
Pt    0.1691    0.7419    0.0938
Pt    0.2063    0.5169    0.0166
Pt    0.2047    0.5181    0.0533
Pt    0.2056    0.5195    0.0914
Pt    0.2054    0.5554    0.0173
Pt    0.2061    0.5544    0.0554
Pt    0.2055    0.5557    0.0922
Pt    0.2052    0.5923    0.0180
Pt    0.2054    0.5932    0.0553
Pt    0.2069    0.5917    0.0921
Pt    0.2066    0.6310    0.0172
Pt    0.2056    0.6299    0.0553
Pt    0.2065    0.6305    0.0928
Pt    0.2049    0.6684    0.0181
Pt    0.2049    0.6676    0.0561
Pt    0.2062    0.6677    0.0937
Pt    0.2056    0.7035    0.0186
Pt    0.2068    0.7046    0.0553
Pt    0.2068    0.7050    0.0948
Pt    0.2034    0.7430    0.0201
Pt    0.2061    0.7429    0.0588
Pt    0.2063    0.7424    0.0936
Pt    0.2431    0.5189    0.0166
Pt    0.2439    0.5186    0.0540
Pt    0.2438    0.5178    0.0926
Pt    0.2433    0.5563    0.0168
Pt    0.2428    0.5561    0.0546
Pt    0.2421    0.5564    0.0942
Pt    0.2442    0.5931    0.0186
Pt    0.2425    0.5926    0.0550
Pt    0.2437    0.5927    0.0928
Pt    0.2453    0.6303    0.0177
Pt    0.2423    0.6294    0.0551
Pt    0.2441    0.6315    0.0938
Pt    0.2446    0.6672    0.0176
Pt    0.2451    0.6679    0.0566
Pt    0.2424    0.6676    0.0936
Pt    0.2417    0.7045    0.0193
Pt    0.2443    0.7044    0.0563
Pt    0.2421    0.7051    0.0939
Pt    0.2425    0.7429    0.0205
Pt    0.2437    0.7419    0.0570
Pt    0.2442    0.7427    0.0943
Pt    0.1683    0.5750    0.1121
Pt    0.1678    0.5745    0.0738
Pt    0.1690    0.5738    0.0364
Pt    0.0172    0.7237    0.0753
Pt    0.0189    0.7247    0.0377
Pt    0.0181    0.5377    0.0379
Pt    0.0183    0.5369    0.0753
Pt    0.0192    0.5371    0.1134
Pt    0.0187    0.6873    0.1130
Pt    0.0170    0.5749    0.0378
Pt    0.0181    0.5750    0.0761
Pt    0.0189    0.5735    0.1116
Pt    0.0179    0.6878    0.0737
Pt    0.0169    0.6124    0.0375
Pt    0.0176    0.6115    0.0742
Pt    0.0174    0.6113    0.1115
Pt    0.0169    0.6874    0.0360
Pt    0.0188    0.6503    0.0362
Pt    0.0186    0.6496    0.0748
Pt    0.0202    0.6487    0.1128
Pt    0.1877    0.7413    0.0013
Pt    0.2434    0.7228    0.2230
Pt    0.2439    0.7238    0.1877
Pt    0.2426    0.7240    0.1494
Pt    0.2436    0.6861    0.2246
Pt    0.2426    0.6864    0.1869
Pt    0.2435    0.6870    0.1498
Pt    0.2444    0.6493    0.2230
Pt    0.2426    0.6498    0.1873
Pt    0.2434    0.6490    0.1495
Pt    0.2430    0.6127    0.2250
Pt    0.2432    0.6125    0.1855
Pt    0.2427    0.6112    0.1495
Pt    0.2426    0.5756    0.2239
Pt    0.2434    0.5738    0.1852
Pt    0.2425    0.5739    0.1494
Pt    0.2407    0.5372    0.2234
Pt    0.2426    0.5365    0.1846
Pt    0.2429    0.5367    0.1493
Pt    0.1685    0.6497    0.2259
Pt    0.1684    0.6486    0.1871
Pt    0.1687    0.6495    0.1497
Pt    0.0369    0.5179    0.1490
Pt    0.0366    0.5173    0.1877
Pt    0.0354    0.5168    0.2260
Pt    0.0366    0.5548    0.1505
Pt    0.0372    0.5558    0.1887
Pt    0.0350    0.5560    0.2263
Pt    0.0377    0.5932    0.1505
Pt    0.0362    0.5913    0.1879
Pt    0.0376    0.5938    0.2267
Pt    0.0373    0.6306    0.1510
Pt    0.0379    0.6301    0.1865
Pt    0.0369    0.6297    0.2260
Pt    0.0379    0.6679    0.1489
Pt    0.0358    0.6679    0.1874
Pt    0.0356    0.6672    0.2241
Pt    0.0372    0.7064    0.1494
Pt    0.0368    0.7054    0.1847
Pt    0.0376    0.7043    0.2246
Pt    0.0369    0.7432    0.1497
Pt    0.0373    0.7434    0.1869
Pt    0.0376    0.7416    0.2229
Pt    0.0738    0.5179    0.1485
Pt    0.0730    0.5177    0.1872
Pt    0.0735    0.5177    0.2241
Pt    0.0752    0.5553    0.1500
Pt    0.0741    0.5560    0.1864
Pt    0.0746    0.5567    0.2266
Pt    0.0752    0.5929    0.1497
Pt    0.0735    0.5934    0.1870
Pt    0.0756    0.5918    0.2253
Pt    0.0758    0.6323    0.1495
Pt    0.0747    0.6310    0.1872
Pt    0.0738    0.6309    0.2254
Pt    0.0745    0.6665    0.1502
Pt    0.0750    0.6679    0.1882
Pt    0.0745    0.6685    0.2246
Pt    0.0754    0.7053    0.1501
Pt    0.0747    0.7061    0.1878
Pt    0.0750    0.7060    0.2253
Pt    0.0732    0.7431    0.1498
Pt    0.0729    0.7442    0.1876
Pt    0.0746    0.7445    0.2236
Pt    0.1111    0.5180    0.1496
Pt    0.1109    0.5196    0.1870
Pt    0.1118    0.5174    0.2245
Pt    0.1124    0.5568    0.1497
Pt    0.1124    0.5554    0.1873
Pt    0.1125    0.5559    0.2253
Pt    0.1118    0.5933    0.1487
Pt    0.1120    0.5926    0.1854
Pt    0.1118    0.5944    0.2255
Pt    0.1131    0.6308    0.1507
Pt    0.1110    0.6306    0.1866
Pt    0.1107    0.6298    0.2242
Pt    0.1114    0.6685    0.1505
Pt    0.1124    0.6675    0.1869
Pt    0.1126    0.6693    0.2248
Pt    0.1127    0.7056    0.1505
Pt    0.1127    0.7062    0.1873
Pt    0.1126    0.7057    0.2249
Pt    0.1116    0.7436    0.1483
Pt    0.1123    0.7448    0.1872
Pt    0.1121    0.7442    0.2236
Pt    0.1489    0.5194    0.1493
Pt    0.1490    0.5192    0.1866
Pt    0.1492    0.5180    0.2234
Pt    0.1508    0.5557    0.1501
Pt    0.1490    0.5562    0.1876
Pt    0.1502    0.5556    0.2264
Pt    0.1509    0.5921    0.1498
Pt    0.1501    0.5922    0.1875
Pt    0.1499    0.5924    0.2245
Pt    0.1494    0.6302    0.1504
Pt    0.1498    0.6294    0.1864
Pt    0.1507    0.6325    0.2242
Pt    0.1502    0.6666    0.1491
Pt    0.1510    0.6686    0.1871
Pt    0.1492    0.6679    0.2251
Pt    0.1494    0.7054    0.1497
Pt    0.1505    0.7055    0.1876
Pt    0.1500    0.7064    0.2241
Pt    0.1498    0.7427    0.1492
Pt    0.1485    0.7439    0.1869
Pt    0.1490    0.7441    0.2237
Pt    0.1865    0.5180    0.1485
Pt    0.1861    0.5187    0.1859
Pt    0.1864    0.5182    0.2232
Pt    0.1870    0.5555    0.1484
Pt    0.1861    0.5551    0.1872
Pt    0.1864    0.5572    0.2237
Pt    0.1875    0.5930    0.1508
Pt    0.1871    0.5927    0.1882
Pt    0.1868    0.5937    0.2242
Pt    0.1877    0.6310    0.1490
Pt    0.1878    0.6313    0.1877
Pt    0.1874    0.6309    0.2249
Pt    0.1880    0.6686    0.1493
Pt    0.1868    0.6676    0.1872
Pt    0.1870    0.6685    0.2261
Pt    0.1875    0.7038    0.1502
Pt    0.1875    0.7057    0.1877
Pt    0.1879    0.7053    0.2247
Pt    0.1873    0.7425    0.1499
Pt    0.1866    0.7435    0.1867
Pt    0.1885    0.7428    0.2244
Pt    0.2237    0.5178    0.1494
Pt    0.2237    0.5170    0.1848
Pt    0.2237    0.5194    0.2229
Pt    0.2233    0.5549    0.1485
Pt    0.2238    0.5550    0.1862
Pt    0.2233    0.5570    0.2240
Pt    0.2239    0.5924    0.1500
Pt    0.2244    0.5930    0.1874
Pt    0.2253    0.5943    0.2249
Pt    0.2239    0.6301    0.1489
Pt    0.2240    0.6302    0.1877
Pt    0.2242    0.6313    0.2243
Pt    0.2249    0.6672    0.1497
Pt    0.2236    0.6683    0.1880
Pt    0.2245    0.6668    0.2254
Pt    0.2245    0.7054    0.1502
Pt    0.2253    0.7056    0.1868
Pt    0.2238    0.7049    0.2243
Pt    0.2243    0.7420    0.1489
Pt    0.2249    0.7424    0.1870
Pt    0.2244    0.7436    0.2235
Pt    0.2056    0.7245    0.2232
Pt    0.2065    0.7235    0.1871
Pt    0.2049    0.7234    0.1498
Pt    0.2058    0.6860    0.2252
Pt    0.2051    0.6868    0.1881
Pt    0.2067    0.6854    0.1505
Pt    0.2054    0.6494    0.2257
Pt    0.2069    0.6488    0.1874
Pt    0.2063    0.6496    0.1495
Pt    0.2055    0.6117    0.2255
Pt    0.2058    0.6126    0.1861
Pt    0.2062    0.6108    0.1517
Pt    0.2047    0.5759    0.2239
Pt    0.2050    0.5745    0.1869
Pt    0.2053    0.5750    0.1485
Pt    0.2042    0.5362    0.2239
Pt    0.2037    0.5368    0.1866
Pt    0.2052    0.5369    0.1485
Pt    0.1677    0.6120    0.2241
Pt    0.1694    0.6114    0.1875
Pt    0.1684    0.6117    0.1505
Pt    0.1675    0.7240    0.2240
Pt    0.1684    0.7243    0.1872
Pt    0.1682    0.7238    0.1506
Pt    0.1685    0.6860    0.2241
Pt    0.1691    0.6881    0.1871
Pt    0.1688    0.6866    0.1491
Pt    0.1681    0.5756    0.2241
Pt    0.1679    0.5738    0.1878
Pt    0.1696    0.5740    0.1494
Pt    0.1669    0.5367    0.2247
Pt    0.0376    0.5364    0.1321
Pt    0.0368    0.5365    0.1686
Pt    0.0354    0.5354    0.2078
Pt    0.0379    0.5369    0.2434
Pt    0.0356    0.5756    0.1317
Pt    0.0367    0.5739    0.1697
Pt    0.0362    0.5747    0.2068
Pt    0.0378    0.5761    0.2444
Pt    0.0379    0.6110    0.1309
Pt    0.0375    0.6107    0.1697
Pt    0.0365    0.6103    0.2060
Pt    0.0369    0.6122    0.2445
Pt    0.0387    0.6481    0.1315
Pt    0.0365    0.6504    0.1678
Pt    0.0363    0.6490    0.2070
Pt    0.0359    0.6492    0.2441
Pt    0.0376    0.6883    0.1315
Pt    0.0374    0.6861    0.1680
Pt    0.0365    0.6862    0.2048
Pt    0.0369    0.6868    0.2432
Pt    0.0379    0.7246    0.1317
Pt    0.0375    0.7245    0.1684
Pt    0.0363    0.7223    0.2053
Pt    0.0363    0.7237    0.2432
Pt    0.1677    0.5371    0.1868
Pt    0.1683    0.5372    0.1480
Pt    0.1307    0.7248    0.2245
Pt    0.1304    0.7263    0.1859
Pt    0.0750    0.5368    0.1309
Pt    0.0740    0.5365    0.1688
Pt    0.0740    0.5381    0.2059
Pt    0.0736    0.5368    0.2421
Pt    0.0754    0.5736    0.1317
Pt    0.0735    0.5742    0.1684
Pt    0.0740    0.5745    0.2057
Pt    0.0734    0.5747    0.2438
Pt    0.0752    0.6120    0.1307
Pt    0.0748    0.6119    0.1688
Pt    0.0737    0.6103    0.2066
Pt    0.0745    0.6118    0.2436
Pt    0.0755    0.6498    0.1302
Pt    0.0752    0.6493    0.1689
Pt    0.0743    0.6489    0.2056
Pt    0.0754    0.6498    0.2431
Pt    0.0752    0.6866    0.1307
Pt    0.0754    0.6868    0.1683
Pt    0.0745    0.6868    0.2069
Pt    0.0748    0.6864    0.2441
Pt    0.0736    0.7230    0.1311
Pt    0.0734    0.7253    0.1688
Pt    0.0745    0.7242    0.2064
Pt    0.0753    0.7250    0.2430
Pt    0.1310    0.7254    0.1485
Pt    0.1322    0.6874    0.2239
Pt    0.1317    0.6859    0.1865
Pt    0.1315    0.6864    0.1502
Pt    0.1120    0.5371    0.1306
Pt    0.1121    0.5375    0.1681
Pt    0.1114    0.5364    0.2075
Pt    0.1124    0.5362    0.2433
Pt    0.1129    0.5758    0.1311
Pt    0.1122    0.5748    0.1677
Pt    0.1118    0.5748    0.2056
Pt    0.1130    0.5755    0.2439
Pt    0.1128    0.6119    0.1312
Pt    0.1117    0.6120    0.1679
Pt    0.1128    0.6122    0.2058
Pt    0.1133    0.6116    0.2432
Pt    0.1126    0.6489    0.1307
Pt    0.1110    0.6495    0.1690
Pt    0.1108    0.6500    0.2063
Pt    0.1144    0.6486    0.2434
Pt    0.1113    0.6874    0.1308
Pt    0.1122    0.6871    0.1686
Pt    0.1129    0.6867    0.2049
Pt    0.1116    0.6875    0.2430
Pt    0.1119    0.7243    0.1308
Pt    0.1120    0.7253    0.1675
Pt    0.1141    0.7246    0.2062
Pt    0.1125    0.7254    0.2421
Pt    0.1310    0.6491    0.2252
Pt    0.1319    0.6501    0.1861
Pt    0.1290    0.6497    0.1497
Pt    0.1322    0.6121    0.2250
Pt    0.1490    0.5378    0.1302
Pt    0.1506    0.5378    0.1680
Pt    0.1476    0.5377    0.2065
Pt    0.1493    0.5364    0.2437
Pt    0.1496    0.5766    0.1307
Pt    0.1503    0.5746    0.1694
Pt    0.1479    0.5744    0.2061
Pt    0.1496    0.5749    0.2446
Pt    0.1496    0.6118    0.1320
Pt    0.1505    0.6112    0.1691
Pt    0.1498    0.6119    0.2052
Pt    0.1520    0.6115    0.2443
Pt    0.1501    0.6489    0.1312
Pt    0.1491    0.6492    0.1680
Pt    0.1500    0.6485    0.2046
Pt    0.1503    0.6486    0.2434
Pt    0.1499    0.6863    0.1314
Pt    0.1498    0.6868    0.1688
Pt    0.1509    0.6865    0.2058
Pt    0.1501    0.6869    0.2433
Pt    0.1485    0.7230    0.1307
Pt    0.1504    0.7232    0.1690
Pt    0.1495    0.7252    0.2055
Pt    0.1488    0.7251    0.2442
Pt    0.1298    0.6115    0.1867
Pt    0.1308    0.6117    0.1508
Pt    0.1311    0.5742    0.2249
Pt    0.1303    0.5742    0.1874
Pt    0.1869    0.5378    0.1294
Pt    0.1854    0.5365    0.1675
Pt    0.1861    0.5377    0.2057
Pt    0.1856    0.5372    0.2428
Pt    0.1874    0.5745    0.1311
Pt    0.1869    0.5740    0.1691
Pt    0.1876    0.5742    0.2054
Pt    0.1876    0.5751    0.2429
Pt    0.1880    0.6119    0.1320
Pt    0.1872    0.6120    0.1693
Pt    0.1884    0.6122    0.2059
Pt    0.1873    0.6128    0.2454
Pt    0.1869    0.6490    0.1304
Pt    0.1868    0.6495    0.1689
Pt    0.1868    0.6504    0.2066
Pt    0.1874    0.6490    0.2449
Pt    0.1871    0.6870    0.1311
Pt    0.1881    0.6856    0.1697
Pt    0.1877    0.6856    0.2056
Pt    0.1867    0.6871    0.2431
Pt    0.1861    0.7246    0.1321
Pt    0.1876    0.7232    0.1685
Pt    0.1863    0.7239    0.2048
Pt    0.1895    0.7241    0.2426
Pt    0.1322    0.5752    0.1499
Pt    0.1298    0.5365    0.2246
Pt    0.1309    0.5372    0.1856
Pt    0.1304    0.5381    0.1481
Pt    0.2254    0.5360    0.1310
Pt    0.2238    0.5368    0.1679
Pt    0.2219    0.5362    0.2033
Pt    0.2227    0.5376    0.2420
Pt    0.2244    0.5746    0.1303
Pt    0.2232    0.5732    0.1677
Pt    0.2244    0.5732    0.2046
Pt    0.2229    0.5745    0.2427
Pt    0.2239    0.6118    0.1305
Pt    0.2245    0.6121    0.1668
Pt    0.2254    0.6117    0.2048
Pt    0.2249    0.6134    0.2428
Pt    0.2241    0.6504    0.1318
Pt    0.2239    0.6469    0.1674
Pt    0.2242    0.6488    0.2074
Pt    0.2269    0.6498    0.2436
Pt    0.2246    0.6875    0.1315
Pt    0.2250    0.6867    0.1695
Pt    0.2246    0.6863    0.2064
Pt    0.2252    0.6864    0.2438
Pt    0.2256    0.7232    0.1301
Pt    0.2235    0.7240    0.1684
Pt    0.2245    0.7239    0.2062
Pt    0.2249    0.7241    0.2416
Pt    0.0187    0.5175    0.1319
Pt    0.0190    0.5178    0.1695
Pt    0.0170    0.5182    0.2073
Pt    0.0171    0.5163    0.2448
Pt    0.0185    0.5564    0.1314
Pt    0.0179    0.5545    0.1694
Pt    0.0187    0.5557    0.2067
Pt    0.0157    0.5567    0.2445
Pt    0.0170    0.5921    0.1321
Pt    0.0182    0.5929    0.1687
Pt    0.0176    0.5932    0.2066
Pt    0.0188    0.5943    0.2455
Pt    0.0190    0.6283    0.1317
Pt    0.0194    0.6302    0.1687
Pt    0.0176    0.6298    0.2067
Pt    0.0169    0.6316    0.2452
Pt    0.0188    0.6670    0.1309
Pt    0.0184    0.6673    0.1668
Pt    0.0175    0.6681    0.2058
Pt    0.0179    0.6679    0.2436
Pt    0.0193    0.7044    0.1307
Pt    0.0178    0.7055    0.1678
Pt    0.0178    0.7047    0.2030
Pt    0.0170    0.7032    0.2437
Pt    0.0181    0.7437    0.1308
Pt    0.0181    0.7431    0.1678
Pt    0.0170    0.7422    0.2049
Pt    0.0184    0.7417    0.2432
Pt    0.0565    0.5170    0.1313
Pt    0.0550    0.5182    0.1692
Pt    0.0550    0.5183    0.2062
Pt    0.0547    0.5173    0.2439
Pt    0.0558    0.5556    0.1316
Pt    0.0561    0.5552    0.1682
Pt    0.0554    0.5554    0.2079
Pt    0.0552    0.5557    0.2440
Pt    0.0575    0.5922    0.1322
Pt    0.0549    0.5919    0.1696
Pt    0.0555    0.5927    0.2072
Pt    0.0568    0.5939    0.2448
Pt    0.0570    0.6306    0.1309
Pt    0.0564    0.6300    0.1691
Pt    0.0544    0.6298    0.2060
Pt    0.0564    0.6309    0.2436
Pt    0.0561    0.6684    0.1309
Pt    0.0562    0.6677    0.1689
Pt    0.0548    0.6685    0.2061
Pt    0.0558    0.6675    0.2432
Pt    0.0554    0.7047    0.1308
Pt    0.0566    0.7051    0.1680
Pt    0.0568    0.7049    0.2055
Pt    0.0556    0.7042    0.2434
Pt    0.0548    0.7432    0.1302
Pt    0.0550    0.7433    0.1682
Pt    0.0569    0.7431    0.2066
Pt    0.0565    0.7427    0.2433
Pt    0.0933    0.5183    0.1305
Pt    0.0919    0.5189    0.1681
Pt    0.0919    0.5196    0.2054
Pt    0.0932    0.5181    0.2441
Pt    0.0934    0.5561    0.1306
Pt    0.0943    0.5567    0.1679
Pt    0.0920    0.5563    0.2059
Pt    0.0940    0.5557    0.2424
Pt    0.0938    0.5940    0.1307
Pt    0.0927    0.5931    0.1680
Pt    0.0937    0.5927    0.2054
Pt    0.0934    0.5931    0.2450
Pt    0.0944    0.6307    0.1313
Pt    0.0935    0.6312    0.1686
Pt    0.0918    0.6294    0.2066
Pt    0.0930    0.6297    0.2441
Pt    0.0931    0.6679    0.1319
Pt    0.0928    0.6682    0.1691
Pt    0.0939    0.6687    0.2069
Pt    0.0938    0.6672    0.2425
Pt    0.0922    0.7065    0.1303
Pt    0.0940    0.7060    0.1689
Pt    0.0933    0.7061    0.2045
Pt    0.0940    0.7058    0.2423
Pt    0.0926    0.7430    0.1317
Pt    0.0930    0.7436    0.1673
Pt    0.0942    0.7421    0.2058
Pt    0.0947    0.7436    0.2443
Pt    0.1294    0.5181    0.1310
Pt    0.1306    0.5195    0.1666
Pt    0.1298    0.5190    0.2052
Pt    0.1306    0.5183    0.2422
Pt    0.1323    0.5577    0.1301
Pt    0.1312    0.5562    0.1677
Pt    0.1305    0.5561    0.2058
Pt    0.1313    0.5551    0.2442
Pt    0.1305    0.5943    0.1323
Pt    0.1316    0.5932    0.1688
Pt    0.1298    0.5932    0.2050
Pt    0.1316    0.5930    0.2425
Pt    0.1315    0.6308    0.1313
Pt    0.1299    0.6311    0.1695
Pt    0.1304    0.6317    0.2051
Pt    0.1325    0.6292    0.2437
Pt    0.1298    0.6690    0.1305
Pt    0.1308    0.6674    0.1680
Pt    0.1314    0.6673    0.2058
Pt    0.1328    0.6679    0.2437
Pt    0.1293    0.7062    0.1317
Pt    0.1327    0.7054    0.1691
Pt    0.1314    0.7046    0.2055
Pt    0.1316    0.7062    0.2426
Pt    0.1303    0.7442    0.1310
Pt    0.1309    0.7433    0.1677
Pt    0.1303    0.7448    0.2051
Pt    0.1308    0.7435    0.2423
Pt    0.1678    0.5189    0.1292
Pt    0.1675    0.5180    0.1677
Pt    0.1683    0.5202    0.2048
Pt    0.1676    0.5188    0.2433
Pt    0.1672    0.5565    0.1304
Pt    0.1690    0.5565    0.1686
Pt    0.1683    0.5568    0.2063
Pt    0.1682    0.5564    0.2433
Pt    0.1694    0.5936    0.1304
Pt    0.1684    0.5924    0.1692
Pt    0.1685    0.5931    0.2057
Pt    0.1691    0.5938    0.2427
Pt    0.1683    0.6306    0.1308
Pt    0.1683    0.6314    0.1679
Pt    0.1692    0.6312    0.2065
Pt    0.1688    0.6319    0.2440
Pt    0.1691    0.6685    0.1303
Pt    0.1683    0.6688    0.1676
Pt    0.1683    0.6674    0.2061
Pt    0.1683    0.6689    0.2440
Pt    0.1689    0.7047    0.1306
Pt    0.1685    0.7047    0.1692
Pt    0.1683    0.7058    0.2057
Pt    0.1689    0.7058    0.2420
Pt    0.1674    0.7416    0.1317
Pt    0.1684    0.7433    0.1673
Pt    0.1688    0.7427    0.2047
Pt    0.1684    0.7439    0.2402
Pt    0.2048    0.5187    0.1299
Pt    0.2036    0.5183    0.1670
Pt    0.2057    0.5174    0.2035
Pt    0.2042    0.5180    0.2428
Pt    0.2058    0.5547    0.1291
Pt    0.2051    0.5553    0.1673
Pt    0.2047    0.5556    0.2050
Pt    0.2046    0.5566    0.2425
Pt    0.2055    0.5933    0.1301
Pt    0.2064    0.5921    0.1684
Pt    0.2064    0.5929    0.2064
Pt    0.2053    0.5937    0.2442
Pt    0.2068    0.6303    0.1306
Pt    0.2057    0.6305    0.1683
Pt    0.2062    0.6303    0.2055
Pt    0.2066    0.6314    0.2432
Pt    0.2048    0.6679    0.1296
Pt    0.2061    0.6669    0.1688
Pt    0.2064    0.6677    0.2065
Pt    0.2073    0.6677    0.2447
Pt    0.2050    0.7068    0.1324
Pt    0.2055    0.7034    0.1685
Pt    0.2061    0.7055    0.2061
Pt    0.2070    0.7048    0.2437
Pt    0.2055    0.7427    0.1310
Pt    0.2062    0.7427    0.1685
Pt    0.2058    0.7435    0.2047
Pt    0.2077    0.7434    0.2440
Pt    0.2418    0.5163    0.1312
Pt    0.2430    0.5173    0.1658
Pt    0.2414    0.5195    0.2036
Pt    0.2417    0.5191    0.2421
Pt    0.2428    0.5548    0.1306
Pt    0.2432    0.5546    0.1667
Pt    0.2420    0.5551    0.2046
Pt    0.2434    0.5553    0.2408
Pt    0.2427    0.5931    0.1298
Pt    0.2430    0.5923    0.1683
Pt    0.2436    0.5932    0.2060
Pt    0.2437    0.5949    0.2435
Pt    0.2426    0.6307    0.1310
Pt    0.2444    0.6295    0.1673
Pt    0.2437    0.6308    0.2042
Pt    0.2436    0.6309    0.2433
Pt    0.2434    0.6690    0.1305
Pt    0.2433    0.6674    0.1678
Pt    0.2440    0.6681    0.2054
Pt    0.2438    0.6682    0.2438
Pt    0.2448    0.7055    0.1303
Pt    0.2443    0.7048    0.1680
Pt    0.2433    0.7043    0.2054
Pt    0.2432    0.7048    0.2436
Pt    0.2438    0.7436    0.1317
Pt    0.2430    0.7427    0.1690
Pt    0.2436    0.7426    0.2053
Pt    0.2430    0.7415    0.2392
Pt    0.0928    0.7251    0.2243
Pt    0.0934    0.7252    0.1875
Pt    0.0925    0.7248    0.1507
Pt    0.0178    0.5355    0.1508
Pt    0.0189    0.5363    0.1875
Pt    0.0173    0.5356    0.2271
Pt    0.0183    0.5735    0.1502
Pt    0.0166    0.5738    0.1875
Pt    0.0174    0.5767    0.2268
Pt    0.0197    0.6108    0.1502
Pt    0.0180    0.6111    0.1877
Pt    0.0175    0.6119    0.2249
Pt    0.0184    0.6488    0.1480
Pt    0.0190    0.6485    0.1883
Pt    0.0171    0.6488    0.2246
Pt    0.0184    0.6859    0.1498
Pt    0.0181    0.6865    0.1856
Pt    0.0182    0.6863    0.2251
Pt    0.0190    0.7239    0.1490
Pt    0.0188    0.7237    0.1867
Pt    0.0193    0.7234    0.2232
Pt    0.0924    0.6871    0.2249
Pt    0.0934    0.6881    0.1876
Pt    0.0937    0.6872    0.1493
Pt    0.0563    0.5372    0.1497
Pt    0.0549    0.5373    0.1894
Pt    0.0551    0.5373    0.2252
Pt    0.0555    0.5733    0.1506
Pt    0.0552    0.5737    0.1886
Pt    0.0554    0.5742    0.2252
Pt    0.0563    0.6114    0.1502
Pt    0.0562    0.6112    0.1869
Pt    0.0547    0.6127    0.2256
Pt    0.0555    0.6484    0.1501
Pt    0.0563    0.6491    0.1871
Pt    0.0554    0.6498    0.2252
Pt    0.0572    0.6870    0.1498
Pt    0.0557    0.6863    0.1869
Pt    0.0559    0.6860    0.2249
Pt    0.0560    0.7240    0.1490
Pt    0.0559    0.7237    0.1884
Pt    0.0571    0.7241    0.2241
Pt    0.0926    0.6489    0.2243
Pt    0.0934    0.6494    0.1875
Pt    0.0941    0.6490    0.1492
Pt    0.0932    0.5370    0.1494
Pt    0.0925    0.5378    0.1870
Pt    0.0920    0.5370    0.2250
Pt    0.0936    0.5746    0.1493
Pt    0.0931    0.5744    0.1866
Pt    0.0940    0.5743    0.2254
Pt    0.0928    0.6115    0.1498
Pt    0.0935    0.6121    0.1877
Pt    0.0923    0.6107    0.2247
Pt    0.1300    0.5013    0.1871
Pt    0.2410    0.5013    0.2228
Pt    0.2444    0.7243    0.3696
Pt    0.2430    0.6863    0.3705
Pt    0.2426    0.6884    0.2974
Pt    0.2457    0.6870    0.2618
Pt    0.2450    0.6491    0.2624
Pt    0.2455    0.6111    0.2631
Pt    0.2420    0.5739    0.2604
Pt    0.2073    0.6502    0.2991
Pt    0.2066    0.6502    0.3353
Pt    0.0371    0.5175    0.2615
Pt    0.0388    0.5190    0.3343
Pt    0.0372    0.5209    0.3710
Pt    0.0367    0.5559    0.2609
Pt    0.0380    0.5566    0.2981
Pt    0.0382    0.5573    0.3345
Pt    0.0373    0.5589    0.3709
Pt    0.0380    0.5943    0.2622
Pt    0.0369    0.5938    0.2987
Pt    0.0363    0.5946    0.3341
Pt    0.0365    0.6309    0.2620
Pt    0.0374    0.6317    0.2991
Pt    0.0370    0.6677    0.2625
Pt    0.0369    0.7050    0.2618
Pt    0.0381    0.7039    0.2978
Pt    0.0376    0.7429    0.2622
Pt    0.0370    0.7411    0.3000
Pt    0.0733    0.5184    0.2613
Pt    0.0739    0.5190    0.2980
Pt    0.0776    0.5213    0.3701
Pt    0.0748    0.5557    0.2626
Pt    0.0738    0.5552    0.2986
Pt    0.0749    0.5561    0.3359
Pt    0.0773    0.5589    0.3728
Pt    0.0743    0.5935    0.2630
Pt    0.0759    0.5934    0.2988
Pt    0.0762    0.5935    0.3357
Pt    0.0755    0.6319    0.2615
Pt    0.0760    0.6309    0.3002
Pt    0.0757    0.6678    0.2618
Pt    0.0755    0.6690    0.2978
Pt    0.0757    0.7063    0.2601
Pt    0.0758    0.7062    0.2981
Pt    0.0759    0.7426    0.2631
Pt    0.1122    0.5175    0.2619
Pt    0.1115    0.5202    0.2990
Pt    0.1120    0.5553    0.2619
Pt    0.1130    0.5559    0.3006
Pt    0.1130    0.5931    0.2625
Pt    0.1126    0.5923    0.2992
Pt    0.1134    0.6302    0.2615
Pt    0.1123    0.6306    0.3007
Pt    0.1134    0.6682    0.2627
Pt    0.1128    0.6661    0.2996
Pt    0.1128    0.7058    0.2610
Pt    0.1126    0.7441    0.2633
Pt    0.1491    0.5179    0.2625
Pt    0.1496    0.5566    0.2627
Pt    0.1490    0.5572    0.2986
Pt    0.1506    0.5938    0.2629
Pt    0.1494    0.5917    0.3000
Pt    0.1512    0.6289    0.2633
Pt    0.1499    0.6300    0.3001
Pt    0.1504    0.6673    0.2623
Pt    0.1488    0.6680    0.2987
Pt    0.1487    0.6689    0.3336
Pt    0.1500    0.7054    0.2624
Pt    0.1505    0.7064    0.2974
Pt    0.1505    0.7084    0.3336
Pt    0.1506    0.7442    0.2613
Pt    0.1845    0.5184    0.2613
Pt    0.1874    0.5565    0.2621
Pt    0.1875    0.5924    0.2626
Pt    0.1898    0.5925    0.2995
Pt    0.1866    0.6295    0.2634
Pt    0.1898    0.6294    0.2996
Pt    0.1870    0.6687    0.2634
Pt    0.1879    0.6692    0.3001
Pt    0.1881    0.6676    0.3344
Pt    0.1870    0.6682    0.3719
Pt    0.1874    0.7061    0.2614
Pt    0.1881    0.7066    0.2975
Pt    0.1866    0.7062    0.3338
Pt    0.1861    0.7061    0.3701
Pt    0.1867    0.7426    0.2596
Pt    0.1894    0.7436    0.2960
Pt    0.1856    0.7451    0.3681
Pt    0.2213    0.5195    0.2612
Pt    0.2227    0.5183    0.2982
Pt    0.2237    0.5558    0.2607
Pt    0.2219    0.5553    0.2983
Pt    0.2249    0.5937    0.2612
Pt    0.2253    0.6315    0.2630
Pt    0.2253    0.6310    0.2989
Pt    0.2260    0.6675    0.2630
Pt    0.2268    0.6680    0.2992
Pt    0.2259    0.6685    0.3340
Pt    0.2241    0.6681    0.3704
Pt    0.2270    0.7049    0.2623
Pt    0.2251    0.7067    0.2980
Pt    0.2244    0.7049    0.3335
Pt    0.2251    0.7069    0.3697
Pt    0.2260    0.7420    0.3688
Pt    0.2071    0.6873    0.2623
Pt    0.2412    0.5372    0.2980
Pt    0.2415    0.5375    0.2599
Pt    0.2065    0.6875    0.2984
Pt    0.0369    0.5369    0.2805
Pt    0.0375    0.5369    0.3159
Pt    0.0381    0.5389    0.3528
Pt    0.0356    0.5747    0.2806
Pt    0.0364    0.5754    0.3167
Pt    0.0359    0.5781    0.3525
Pt    0.0371    0.6130    0.2808
Pt    0.0380    0.6118    0.3157
Pt    0.0377    0.6494    0.2813
Pt    0.0377    0.6854    0.2815
Pt    0.0378    0.7227    0.2810
Pt    0.0391    0.5023    0.3528
Pt    0.0744    0.5371    0.2798
Pt    0.0748    0.5385    0.3170
Pt    0.0759    0.5394    0.3530
Pt    0.0759    0.5740    0.2818
Pt    0.0744    0.5757    0.3169
Pt    0.0746    0.5773    0.3549
Pt    0.0750    0.6137    0.2810
Pt    0.0753    0.6107    0.3164
Pt    0.0753    0.6496    0.2800
Pt    0.0762    0.6875    0.2789
Pt    0.0759    0.7228    0.2797
Pt    0.1109    0.5368    0.2798
Pt    0.1116    0.5384    0.3177
Pt    0.1117    0.5736    0.2804
Pt    0.1122    0.5745    0.3194
Pt    0.1128    0.6125    0.2815
Pt    0.1117    0.6484    0.2823
Pt    0.1124    0.6859    0.2814
Pt    0.1123    0.7256    0.2795
Pt    0.1486    0.5368    0.2812
Pt    0.1507    0.5749    0.2802
Pt    0.1499    0.6113    0.2824
Pt    0.1503    0.6486    0.2807
Pt    0.1502    0.6493    0.3187
Pt    0.1483    0.6874    0.2802
Pt    0.1498    0.6888    0.3172
Pt    0.1496    0.7265    0.2807
Pt    0.1489    0.7258    0.3145
Pt    0.1858    0.5367    0.2794
Pt    0.1864    0.5738    0.2818
Pt    0.1888    0.6108    0.2808
Pt    0.1873    0.6494    0.2808
Pt    0.1874    0.6498    0.3179
Pt    0.1878    0.6879    0.2801
Pt    0.1878    0.6873    0.3170
Pt    0.1871    0.6880    0.3533
Pt    0.1872    0.7253    0.2781
Pt    0.1883    0.7254    0.3155
Pt    0.1879    0.7252    0.3510
Pt    0.0599    0.5032    0.3699
Pt    0.2221    0.5376    0.2793
Pt    0.2259    0.5749    0.2798
Pt    0.2252    0.6120    0.2805
Pt    0.2257    0.6498    0.2809
Pt    0.2257    0.6491    0.3169
Pt    0.2249    0.6860    0.2792
Pt    0.2249    0.6862    0.3156
Pt    0.2264    0.6866    0.3536
Pt    0.2251    0.7249    0.3178
Pt    0.2242    0.7243    0.3497
Pt    0.0197    0.5198    0.3525
Pt    0.0190    0.5550    0.2803
Pt    0.0200    0.5556    0.3165
Pt    0.0186    0.5582    0.3503
Pt    0.0164    0.5939    0.2815
Pt    0.0183    0.5935    0.3164
Pt    0.0178    0.6325    0.2808
Pt    0.0186    0.7045    0.2808
Pt    0.0193    0.7407    0.2799
Pt    0.0549    0.5187    0.2806
Pt    0.0582    0.5183    0.3174
Pt    0.0562    0.5202    0.3521
Pt    0.0555    0.5560    0.2804
Pt    0.0551    0.5572    0.3166
Pt    0.0566    0.5587    0.3536
Pt    0.0550    0.5948    0.2819
Pt    0.0558    0.5939    0.3179
Pt    0.0560    0.6305    0.2799
Pt    0.0552    0.6679    0.2798
Pt    0.0569    0.7028    0.2804
Pt    0.0556    0.7425    0.2819
Pt    0.0939    0.5180    0.2807
Pt    0.0924    0.5200    0.3164
Pt    0.0942    0.5547    0.2807
Pt    0.0934    0.5566    0.3176
Pt    0.0944    0.5925    0.2809
Pt    0.0936    0.5930    0.3177
Pt    0.0942    0.6308    0.2811
Pt    0.0941    0.6670    0.2801
Pt    0.0949    0.7053    0.2807
Pt    0.1299    0.5194    0.2819
Pt    0.1298    0.5566    0.2812
Pt    0.1317    0.5929    0.2816
Pt    0.1313    0.6305    0.2806
Pt    0.1313    0.6655    0.2799
Pt    0.1294    0.6673    0.3174
Pt    0.1301    0.7047    0.2805
Pt    0.1312    0.7067    0.3150
Pt    0.1314    0.7445    0.2805
Pt    0.1687    0.5551    0.2834
Pt    0.1686    0.5925    0.2819
Pt    0.1693    0.6303    0.2816
Pt    0.1706    0.6313    0.3169
Pt    0.1683    0.6684    0.2807
Pt    0.1683    0.6701    0.3163
Pt    0.1694    0.6682    0.3513
Pt    0.1683    0.7076    0.2810
Pt    0.1698    0.7060    0.3159
Pt    0.1683    0.7071    0.3514
Pt    0.1704    0.7455    0.2783
Pt    0.2033    0.5180    0.2803
Pt    0.2043    0.5552    0.2803
Pt    0.2073    0.5932    0.2812
Pt    0.2064    0.6302    0.2802
Pt    0.2053    0.6316    0.3186
Pt    0.2054    0.6668    0.2803
Pt    0.2073    0.6678    0.3165
Pt    0.2060    0.6685    0.3531
Pt    0.2066    0.7061    0.2795
Pt    0.2062    0.7055    0.3149
Pt    0.2061    0.7056    0.3510
Pt    0.2071    0.7413    0.3150
Pt    0.2056    0.7429    0.3507
Pt    0.2393    0.5197    0.2804
Pt    0.2411    0.5553    0.2792
Pt    0.2431    0.6299    0.2801
Pt    0.2446    0.6692    0.2803
Pt    0.2420    0.7062    0.3161
Pt    0.2441    0.7062    0.3529
Pt    0.2057    0.7229    0.3695
Pt    0.0187    0.5363    0.2610
Pt    0.0200    0.5373    0.3341
Pt    0.0185    0.5404    0.3712
Pt    0.0176    0.5752    0.2634
Pt    0.0170    0.5742    0.2988
Pt    0.0187    0.5780    0.3697
Pt    0.0183    0.6116    0.2630
Pt    0.0190    0.6127    0.2984
Pt    0.0180    0.6508    0.2637
Pt    0.0185    0.6863    0.2626
Pt    0.0184    0.7223    0.2626
Pt    0.0192    0.7225    0.2994
Pt    0.2057    0.7245    0.3330
Pt    0.0551    0.5376    0.2623
Pt    0.0558    0.5371    0.2987
Pt    0.0564    0.5386    0.3343
Pt    0.0565    0.5401    0.3709
Pt    0.0566    0.5746    0.2644
Pt    0.0561    0.5750    0.2985
Pt    0.0561    0.5776    0.3367
Pt    0.0549    0.5773    0.3717
Pt    0.0570    0.6122    0.2624
Pt    0.0563    0.6134    0.3000
Pt    0.0564    0.6488    0.2617
Pt    0.0577    0.6501    0.2977
Pt    0.0551    0.6860    0.2618
Pt    0.0565    0.7242    0.2633
Pt    0.0565    0.7236    0.2972
Pt    0.2058    0.7244    0.2964
Pt    0.0925    0.5360    0.2619
Pt    0.0930    0.5382    0.2992
Pt    0.0939    0.5377    0.3354
Pt    0.0933    0.5744    0.2617
Pt    0.0952    0.5751    0.3004
Pt    0.0915    0.5739    0.3360
Pt    0.0939    0.6118    0.2628
Pt    0.0945    0.6115    0.3000
Pt    0.0953    0.6494    0.2621
Pt    0.0930    0.6496    0.2993
Pt    0.0945    0.6865    0.2626
Pt    0.0938    0.6864    0.2978
Pt    0.0950    0.7238    0.2610
Pt    0.2079    0.7266    0.2616
Pt    0.1301    0.5353    0.2619
Pt    0.1316    0.5372    0.2995
Pt    0.1306    0.5760    0.2628
Pt    0.1305    0.5744    0.2994
Pt    0.1315    0.6109    0.2623
Pt    0.1304    0.6106    0.3002
Pt    0.1327    0.6481    0.2608
Pt    0.1317    0.6487    0.3001
Pt    0.1310    0.6871    0.2619
Pt    0.1302    0.6859    0.2993
Pt    0.1309    0.7259    0.2622
Pt    0.1312    0.7243    0.2966
Pt    0.1676    0.5382    0.2630
Pt    0.1687    0.5735    0.2613
Pt    0.1691    0.5740    0.2993
Pt    0.1691    0.6113    0.2643
Pt    0.1689    0.6116    0.3002
Pt    0.1683    0.6493    0.2621
Pt    0.1692    0.6503    0.2994
Pt    0.1686    0.6482    0.3359
Pt    0.1682    0.6876    0.2616
Pt    0.1686    0.6878    0.2978
Pt    0.1677    0.6883    0.3352
Pt    0.1691    0.6869    0.3703
Pt    0.1683    0.7249    0.2611
Pt    0.1699    0.7273    0.2983
Pt    0.1689    0.7254    0.3332
Pt    0.1694    0.7238    0.3698
Pt    0.2064    0.6887    0.3711
Pt    0.2064    0.6859    0.3361
Pt    0.2039    0.5376    0.2603
Pt    0.2029    0.5361    0.2972
Pt    0.2059    0.5750    0.2624
Pt    0.2048    0.5736    0.2965
Pt    0.2067    0.6125    0.2615
Pt    0.2068    0.6489    0.2630
Pt    0.0024    0.7408    0.3723
Pt    0.0014    0.5385    0.3532
Pt    0.0014    0.7414    0.2987
Pt    0.2402    0.5011    0.3710
Pt    0.2403    0.5011    0.2609
Pt    0.2413    0.7230    0.4830
Pt    0.0948    0.5028    0.4081
Pt    0.2431    0.7227    0.4448
Pt    0.2430    0.7233    0.4074
Pt    0.2410    0.6854    0.4832
Pt    0.2427    0.6843    0.4453
Pt    0.2430    0.6867    0.4071
Pt    0.0016    0.6169    0.4266
Pt    0.0012    0.5971    0.4457
Pt    0.2396    0.5025    0.4080
Pt    0.0931    0.5572    0.5010
Pt    0.0203    0.5013    0.4081
Pt    0.0388    0.5188    0.4062
Pt    0.0368    0.5199    0.4454
Pt    0.0370    0.5190    0.4825
Pt    0.0373    0.5580    0.4068
Pt    0.0373    0.5578    0.4455
Pt    0.0378    0.5575    0.4821
Pt    0.0385    0.5954    0.4087
Pt    0.0380    0.5958    0.4453
Pt    0.0385    0.5955    0.4831
Pt    0.0557    0.6135    0.4092
Pt    0.0377    0.6316    0.4454
Pt    0.0363    0.6344    0.4836
Pt    0.0769    0.5225    0.4087
Pt    0.0761    0.5213    0.4465
Pt    0.0759    0.5191    0.4829
Pt    0.0766    0.5573    0.4074
Pt    0.0762    0.5585    0.4463
Pt    0.0751    0.5584    0.4818
Pt    0.0732    0.5942    0.4073
Pt    0.0751    0.5953    0.4446
Pt    0.0733    0.5965    0.4827
Pt    0.0758    0.6314    0.4840
Pt    0.1130    0.5217    0.4076
Pt    0.1137    0.5195    0.4451
Pt    0.1146    0.5206    0.4822
Pt    0.1094    0.5773    0.4268
Pt    0.1137    0.5584    0.4439
Pt    0.1124    0.5572    0.4824
Pt    0.1111    0.5954    0.4447
Pt    0.1113    0.5943    0.4822
Pt    0.1127    0.6316    0.4447
Pt    0.1120    0.6302    0.4824
Pt    0.1111    0.6683    0.4815
Pt    0.1679    0.6306    0.4995
Pt    0.1474    0.5931    0.4806
Pt    0.1488    0.6309    0.4453
Pt    0.1482    0.6307    0.4812
Pt    0.1495    0.6683    0.4441
Pt    0.1488    0.6668    0.4829
Pt    0.1513    0.7055    0.4074
Pt    0.1502    0.7047    0.4448
Pt    0.1483    0.7050    0.4830
Pt    0.1513    0.7422    0.4076
Pt    0.1488    0.7431    0.4457
Pt    0.1480    0.7421    0.4822
Pt    0.1859    0.6282    0.4819
Pt    0.1861    0.6670    0.4066
Pt    0.1862    0.6673    0.4441
Pt    0.1858    0.6666    0.4804
Pt    0.1867    0.7047    0.4074
Pt    0.1862    0.7056    0.4452
Pt    0.1864    0.7040    0.4823
Pt    0.1865    0.7424    0.4068
Pt    0.1881    0.7415    0.4452
Pt    0.1859    0.7409    0.4837
Pt    0.2234    0.6312    0.4069
Pt    0.2238    0.6304    0.4447
Pt    0.2227    0.6301    0.4826
Pt    0.2240    0.6685    0.4052
Pt    0.2243    0.6675    0.4454
Pt    0.2228    0.6666    0.4831
Pt    0.2245    0.7045    0.4070
Pt    0.2249    0.7043    0.4438
Pt    0.2229    0.7042    0.4830
Pt    0.2251    0.7420    0.4059
Pt    0.2246    0.7415    0.4460
Pt    0.2235    0.7434    0.4828
Pt    0.2412    0.6476    0.4815
Pt    0.2420    0.6480    0.4449
Pt    0.2410    0.6492    0.4067
Pt    0.2399    0.6104    0.4818
Pt    0.0011    0.5212    0.4078
Pt    0.2043    0.7239    0.4824
Pt    0.2061    0.7229    0.4462
Pt    0.2052    0.7250    0.4063
Pt    0.0199    0.5015    0.4459
Pt    0.0757    0.5023    0.4267
Pt    0.0018    0.5963    0.4819
Pt    0.2038    0.6855    0.4827
Pt    0.0385    0.5015    0.4259
Pt    0.2049    0.6861    0.4443
Pt    0.2051    0.6848    0.4075
Pt    0.2040    0.6478    0.4814
Pt    0.0383    0.5395    0.3899
Pt    0.0370    0.5385    0.4251
Pt    0.0377    0.5392    0.4645
Pt    0.0370    0.5779    0.3890
Pt    0.0372    0.5770    0.4265
Pt    0.0376    0.5766    0.4628
Pt    0.0390    0.6152    0.4266
Pt    0.0375    0.6142    0.4661
Pt    0.2055    0.6472    0.4459
Pt    0.2060    0.6501    0.4057
Pt    0.0592    0.5019    0.4070
Pt    0.0769    0.5389    0.3874
Pt    0.0750    0.5402    0.4288
Pt    0.0746    0.5385    0.4653
Pt    0.0737    0.5783    0.3892
Pt    0.0743    0.5756    0.4263
Pt    0.0742    0.5768    0.4637
Pt    0.0765    0.6156    0.4631
Pt    0.1306    0.5932    0.5005
Pt    0.1492    0.5016    0.4619
Pt    0.1136    0.5389    0.4262
Pt    0.1120    0.5390    0.4639
Pt    0.1124    0.5762    0.4631
Pt    0.1121    0.6122    0.4636
Pt    0.1132    0.6501    0.4636
Pt    0.1663    0.7229    0.4829
Pt    0.1478    0.6119    0.4620
Pt    0.1498    0.6491    0.4640
Pt    0.1481    0.6874    0.4262
Pt    0.1503    0.6854    0.4640
Pt    0.1507    0.7236    0.4272
Pt    0.1490    0.7238    0.4627
Pt    0.1861    0.6491    0.4252
Pt    0.1856    0.6470    0.4619
Pt    0.1873    0.6877    0.3884
Pt    0.1871    0.6854    0.4241
Pt    0.1868    0.6857    0.4629
Pt    0.1866    0.7251    0.3878
Pt    0.1872    0.7225    0.4253
Pt    0.1851    0.7238    0.4643
Pt    0.0025    0.7368    0.4083
Pt    0.2239    0.6481    0.4257
Pt    0.2242    0.6483    0.4642
Pt    0.2242    0.6866    0.3881
Pt    0.2235    0.6852    0.4259
Pt    0.2242    0.6859    0.4640
Pt    0.2248    0.7234    0.3885
Pt    0.2229    0.7239    0.4253
Pt    0.2241    0.7229    0.4635
Pt    0.0207    0.5194    0.3895
Pt    0.0193    0.5199    0.4266
Pt    0.0184    0.5202    0.4649
Pt    0.0187    0.5591    0.3891
Pt    0.0185    0.5580    0.4252
Pt    0.0190    0.5563    0.4647
Pt    0.0209    0.5964    0.3898
Pt    0.0192    0.5967    0.4269
Pt    0.0199    0.5947    0.4640
Pt    0.0208    0.6334    0.4641
Pt    0.0210    0.7388    0.4268
Pt    0.0580    0.5214    0.3883
Pt    0.0571    0.5196    0.4268
Pt    0.0569    0.5195    0.4646
Pt    0.0580    0.5572    0.3889
Pt    0.0550    0.5578    0.4264
Pt    0.0564    0.5567    0.4631
Pt    0.0558    0.5953    0.4264
Pt    0.0560    0.5953    0.4643
Pt    0.0566    0.6333    0.4659
Pt    0.0954    0.5211    0.3896
Pt    0.0951    0.5199    0.4281
Pt    0.0941    0.5202    0.4647
Pt    0.0937    0.5581    0.4267
Pt    0.0942    0.5575    0.4636
Pt    0.0920    0.5951    0.4623
Pt    0.0948    0.6324    0.4626
Pt    0.1331    0.5215    0.4628
Pt    0.1294    0.5572    0.4648
Pt    0.1314    0.5920    0.4601
Pt    0.1308    0.6304    0.4282
Pt    0.1301    0.6309    0.4632
Pt    0.1312    0.6694    0.4652
Pt    0.1319    0.7057    0.4267
Pt    0.1324    0.7047    0.4627
Pt    0.1314    0.7415    0.4256
Pt    0.1297    0.7417    0.4638
Pt    0.1694    0.6283    0.4622
Pt    0.1677    0.6700    0.4265
Pt    0.1676    0.6665    0.4614
Pt    0.1675    0.7050    0.3889
Pt    0.1686    0.7047    0.4257
Pt    0.1676    0.7039    0.4644
Pt    0.1667    0.7429    0.3865
Pt    0.1684    0.7424    0.4269
Pt    0.1674    0.7436    0.4642
Pt    0.2059    0.6317    0.4263
Pt    0.2049    0.6279    0.4642
Pt    0.2050    0.6675    0.3878
Pt    0.2048    0.6666    0.4250
Pt    0.2052    0.6669    0.4633
Pt    0.2062    0.7057    0.3894
Pt    0.2049    0.7050    0.4262
Pt    0.2052    0.7041    0.4639
Pt    0.2052    0.7434    0.3866
Pt    0.2062    0.7427    0.4256
Pt    0.2056    0.7409    0.4637
Pt    0.2409    0.5199    0.4267
Pt    0.2412    0.6302    0.4243
Pt    0.2410    0.6287    0.4642
Pt    0.2421    0.6653    0.3869
Pt    0.2410    0.6663    0.4257
Pt    0.2426    0.6671    0.4643
Pt    0.2432    0.7051    0.3885
Pt    0.2412    0.7045    0.4250
Pt    0.2420    0.7048    0.4636
Pt    0.2441    0.7424    0.3883
Pt    0.2419    0.7421    0.4262
Pt    0.2435    0.7426    0.4646
Pt    0.1686    0.7249    0.4449
Pt    0.0013    0.5790    0.3891
Pt    0.1688    0.7244    0.4064
Pt    0.0189    0.5389    0.4076
Pt    0.0189    0.5381    0.4444
Pt    0.0184    0.5385    0.4841
Pt    0.0188    0.5783    0.4087
Pt    0.0189    0.5767    0.4453
Pt    0.0199    0.5760    0.4827
Pt    0.0205    0.6150    0.4095
Pt    0.0202    0.6138    0.4455
Pt    0.0187    0.6156    0.4843
Pt    0.1663    0.6853    0.4822
Pt    0.1691    0.6865    0.4438
Pt    0.1672    0.6866    0.4075
Pt    0.0573    0.5394    0.4082
Pt    0.0548    0.5378    0.4458
Pt    0.0564    0.5392    0.4828
Pt    0.0565    0.5749    0.4076
Pt    0.0572    0.5760    0.4451
Pt    0.0562    0.5764    0.4825
Pt    0.0755    0.6132    0.4268
Pt    0.0576    0.6144    0.4451
Pt    0.0559    0.6150    0.4837
Pt    0.1676    0.6484    0.4809
Pt    0.0016    0.5011    0.4638
Pt    0.1685    0.6468    0.4441
Pt    0.0953    0.5398    0.4090
Pt    0.0951    0.5393    0.4450
Pt    0.0943    0.5379    0.4831
Pt    0.0937    0.5757    0.4070
Pt    0.0932    0.5769    0.4451
Pt    0.0933    0.5769    0.4835
Pt    0.0938    0.6138    0.4443
Pt    0.0934    0.6130    0.4826
Pt    0.0954    0.6490    0.4821
Pt    0.1665    0.6110    0.4816
Pt    0.1330    0.5029    0.4818
Pt    0.1130    0.5582    0.4103
Pt    0.1302    0.5400    0.4464
Pt    0.1313    0.5383    0.4830
Pt    0.1311    0.5745    0.4826
Pt    0.1316    0.6116    0.4433
Pt    0.1304    0.6125    0.4810
Pt    0.1316    0.6507    0.4448
Pt    0.1302    0.6485    0.4829
Pt    0.1292    0.6861    0.4837
Pt    0.1345    0.7230    0.4081
Pt    0.1290    0.7236    0.4449
Pt    0.1285    0.7228    0.4810
Pt    0.0390    0.5019    0.3878
Pt    0.2038    0.6669    0.5005
Pt    0.1488    0.6109    0.5000
Pt    0.1465    0.7240    0.5008
Pt    0.1159    0.5018    0.4249
Pt    0.0019    0.5021    0.4257
Pt    0.0570    0.5019    0.4461
Pt    0.1328    0.5018    0.4439
Pt    0.1852    0.6850    0.5008
Pt    0.0780    0.5024    0.3882
Pt    0.2421    0.6304    0.5006
Pt    0.0031    0.7225    0.4295
Pt    0.1854    0.6488    0.4992
Pt    0.1484    0.6488    0.5006
Pt    0.0020    0.6331    0.4831
Pt    0.2239    0.5029    0.4275
Pt    0.2043    0.6298    0.4995
Pt    0.2238    0.6122    0.5011
Pt    0.0017    0.6336    0.4449
Pt    0.2413    0.7050    0.5011
Pt    0.1130    0.7234    0.5003
Pt    0.1471    0.6863    0.5010
Pt    0.1120    0.5757    0.5002
Pt    0.1304    0.6294    0.5011
Pt    0.0194    0.5583    0.5007
Pt    0.2419    0.6673    0.5008
Pt    0.1131    0.5387    0.5009
Pt    0.2062    0.7420    0.5006
Pt    0.0565    0.5575    0.5010
Pt    0.1664    0.7419    0.5007
Pt    0.2418    0.7222    0.5961
Pt    0.0548    0.6145    0.5574
Pt    0.0752    0.5392    0.5016
Pt    0.0015    0.5182    0.5569
Pt    0.1677    0.7225    0.5574
Pt    0.0560    0.6135    0.5219
Pt    0.0571    0.5766    0.5959
Pt    0.0561    0.5025    0.5571
Pt    0.0568    0.5017    0.5944
Pt    0.1123    0.6127    0.5027
Pt    0.0567    0.5767    0.5581
Pt    0.1668    0.7235    0.5197
Pt    0.0389    0.5204    0.5206
Pt    0.0376    0.5189    0.5576
Pt    0.0375    0.5201    0.5956
Pt    0.0378    0.5566    0.5200
Pt    0.0391    0.5568    0.5588
Pt    0.0382    0.5582    0.5949
Pt    0.0369    0.5962    0.5207
Pt    0.0372    0.5950    0.5569
Pt    0.0385    0.5940    0.5956
Pt    0.0389    0.6330    0.5218
Pt    0.0753    0.5196    0.5191
Pt    0.0758    0.5204    0.5580
Pt    0.0752    0.5203    0.5951
Pt    0.0751    0.5582    0.5205
Pt    0.0755    0.5578    0.5588
Pt    0.0752    0.5568    0.5949
Pt    0.0750    0.5955    0.5216
Pt    0.0756    0.5946    0.5588
Pt    0.0735    0.6325    0.5212
Pt    0.1131    0.5208    0.5220
Pt    0.1142    0.5194    0.5563
Pt    0.1132    0.5216    0.5939
Pt    0.1110    0.5583    0.5190
Pt    0.1111    0.5579    0.5581
Pt    0.1127    0.5939    0.5191
Pt    0.1133    0.6302    0.5215
Pt    0.1132    0.6653    0.5211
Pt    0.1117    0.7414    0.5205
Pt    0.1106    0.7393    0.5945
Pt    0.1483    0.5213    0.5956
Pt    0.1506    0.5921    0.5154
Pt    0.1498    0.6304    0.5170
Pt    0.1478    0.6672    0.5209
Pt    0.1498    0.7050    0.5197
Pt    0.1477    0.7045    0.5567
Pt    0.1477    0.7414    0.5196
Pt    0.1484    0.7412    0.5578
Pt    0.1485    0.7415    0.5931
Pt    0.1853    0.6291    0.5170
Pt    0.1859    0.6668    0.5194
Pt    0.1844    0.6653    0.5570
Pt    0.1854    0.7038    0.5199
Pt    0.1857    0.7041    0.5569
Pt    0.1852    0.7045    0.5973
Pt    0.1863    0.7425    0.5202
Pt    0.1869    0.7396    0.5570
Pt    0.1850    0.7413    0.5943
Pt    0.2229    0.6301    0.5198
Pt    0.2234    0.6290    0.5563
Pt    0.2236    0.6292    0.5939
Pt    0.2220    0.6660    0.5206
Pt    0.2234    0.6662    0.5568
Pt    0.2210    0.6655    0.5944
Pt    0.2243    0.7043    0.5213
Pt    0.2225    0.7040    0.5578
Pt    0.2232    0.7040    0.5944
Pt    0.2229    0.7415    0.5202
Pt    0.2244    0.7413    0.5574
Pt    0.2222    0.7418    0.5942
Pt    0.2417    0.7215    0.5582
Pt    0.1322    0.6124    0.5223
Pt    0.1313    0.5744    0.5196
Pt    0.1326    0.5568    0.5016
Pt    0.1306    0.5203    0.5028
Pt    0.1293    0.5401    0.5201
Pt    0.0942    0.5207    0.5018
Pt    0.2423    0.7229    0.5200
Pt    0.1303    0.7215    0.5953
Pt    0.0758    0.5019    0.5754
Pt    0.2053    0.7060    0.6147
Pt    0.0933    0.5950    0.5016
Pt    0.0552    0.5775    0.5210
Pt    0.2414    0.6844    0.5949
Pt    0.0176    0.6336    0.5035
Pt    0.0939    0.6482    0.5208
Pt    0.2414    0.6855    0.5578
Pt    0.2413    0.6858    0.5202
Pt    0.2044    0.7425    0.5764
Pt    0.2027    0.7031    0.5761
Pt    0.2417    0.5189    0.6133
Pt    0.2419    0.6477    0.5933
Pt    0.0562    0.5385    0.5947
Pt    0.0380    0.5379    0.5396
Pt    0.0378    0.5380    0.5767
Pt    0.0386    0.5379    0.6147
Pt    0.2053    0.7423    0.5388
Pt    0.0362    0.5755    0.5391
Pt    0.0363    0.5763    0.5760
Pt    0.0373    0.5749    0.6134
Pt    0.2037    0.7216    0.5941
Pt    0.0372    0.6152    0.5391
Pt    0.0379    0.6139    0.5762
Pt    0.1135    0.5014    0.5757
Pt    0.2041    0.7046    0.5389
Pt    0.0377    0.5013    0.6143
Pt    0.2408    0.7028    0.6144
Pt    0.0573    0.5393    0.5576
Pt    0.0752    0.5381    0.5389
Pt    0.0747    0.5378    0.5758
Pt    0.0752    0.5385    0.6139
Pt    0.0943    0.6141    0.5212
Pt    0.0748    0.5755    0.5390
Pt    0.0746    0.5767    0.5765
Pt    0.2417    0.6295    0.5385
Pt    0.0760    0.6148    0.5394
Pt    0.0576    0.5399    0.5199
Pt    0.2431    0.6495    0.5559
Pt    0.2423    0.7049    0.5767
Pt    0.1677    0.7227    0.5952
Pt    0.2052    0.7225    0.5574
Pt    0.1138    0.5397    0.5390
Pt    0.1133    0.5390    0.5752
Pt    0.2425    0.7034    0.5389
Pt    0.1117    0.5756    0.5379
Pt    0.1661    0.6127    0.5172
Pt    0.2046    0.7223    0.5207
Pt    0.2036    0.6869    0.5939
Pt    0.1139    0.7231    0.6144
Pt    0.2418    0.6485    0.5186
Pt    0.2033    0.6853    0.5571
Pt    0.2427    0.7408    0.6125
Pt    0.0942    0.5392    0.5198
Pt    0.1485    0.6870    0.5377
Pt    0.0937    0.5761    0.5573
Pt    0.1475    0.7233    0.5379
Pt    0.1488    0.7221    0.5770
Pt    0.1494    0.7227    0.6135
Pt    0.2403    0.6672    0.6128
Pt    0.1862    0.6458    0.5373
Pt    0.0930    0.5774    0.5193
Pt    0.1846    0.6844    0.5386
Pt    0.1847    0.6838    0.5753
Pt    0.2034    0.7398    0.6135
Pt    0.1856    0.7227    0.5381
Pt    0.1878    0.7233    0.5757
Pt    0.1862    0.7222    0.6147
Pt    0.2413    0.6118    0.5928
Pt    0.2052    0.6853    0.5210
Pt    0.2240    0.6083    0.6104
Pt    0.1663    0.6853    0.5197
Pt    0.2228    0.6474    0.5372
Pt    0.2213    0.6472    0.5759
Pt    0.2232    0.6478    0.6124
Pt    0.2411    0.6670    0.5759
Pt    0.2236    0.6847    0.5392
Pt    0.2231    0.6849    0.5762
Pt    0.2202    0.6851    0.6125
Pt    0.0193    0.6468    0.5941
Pt    0.2231    0.7219    0.5397
Pt    0.2229    0.7222    0.5763
Pt    0.2245    0.7217    0.6146
Pt    0.2042    0.6477    0.5562
Pt    0.0195    0.5193    0.5385
Pt    0.0194    0.5200    0.5763
Pt    0.0196    0.5198    0.6139
Pt    0.2418    0.5932    0.6110
Pt    0.0186    0.5569    0.5391
Pt    0.0197    0.5568    0.5762
Pt    0.0195    0.5549    0.6136
Pt    0.2426    0.6665    0.5380
Pt    0.0181    0.5952    0.5389
Pt    0.0197    0.5957    0.5756
Pt    0.0188    0.5945    0.6105
Pt    0.0186    0.6143    0.5936
Pt    0.0179    0.6322    0.5406
Pt    0.0190    0.6316    0.5742
Pt    0.0211    0.6301    0.6125
Pt    0.0177    0.6675    0.6126
Pt    0.0215    0.7403    0.6124
Pt    0.0180    0.6132    0.5566
Pt    0.0570    0.5203    0.5387
Pt    0.0569    0.5199    0.5760
Pt    0.0572    0.5192    0.6138
Pt    0.0182    0.6148    0.5215
Pt    0.0559    0.5581    0.5385
Pt    0.0566    0.5581    0.5778
Pt    0.0570    0.5566    0.6130
Pt    0.0935    0.5384    0.5577
Pt    0.0578    0.5957    0.5400
Pt    0.0547    0.5943    0.5763
Pt    0.2416    0.6293    0.6119
Pt    0.0182    0.5750    0.5950
Pt    0.0944    0.5188    0.5383
Pt    0.0952    0.5202    0.5757
Pt    0.0938    0.5210    0.6132
Pt    0.0186    0.5758    0.5586
Pt    0.0931    0.5575    0.5399
Pt    0.0934    0.5564    0.5768
Pt    0.2420    0.6306    0.5748
Pt    0.0946    0.5946    0.5390
Pt    0.1296    0.7234    0.5208
Pt    0.0939    0.7404    0.6143
Pt    0.2422    0.6125    0.5199
Pt    0.1315    0.5200    0.5389
Pt    0.1328    0.5216    0.5756
Pt    0.1311    0.5208    0.6135
Pt    0.0183    0.5755    0.5206
Pt    0.1681    0.6485    0.5195
Pt    0.2428    0.7414    0.5766
Pt    0.1306    0.7232    0.5566
Pt    0.0183    0.5377    0.5950
Pt    0.1294    0.7056    0.5384
Pt    0.2037    0.6488    0.5194
Pt    0.1293    0.7417    0.5389
Pt    0.1284    0.7392    0.5767
Pt    0.1317    0.7416    0.6125
Pt    0.1680    0.5216    0.6127
Pt    0.1672    0.6864    0.5571
Pt    0.2425    0.7404    0.5382
Pt    0.1658    0.6660    0.5387
Pt    0.1299    0.6863    0.5206
Pt    0.1671    0.7039    0.5395
Pt    0.1683    0.7054    0.5765
Pt    0.0938    0.5390    0.5957
Pt    0.1674    0.7406    0.5395
Pt    0.1674    0.7408    0.5758
Pt    0.1678    0.7409    0.6136
Pt    0.0185    0.5388    0.5571
Pt    0.2045    0.6294    0.5374
Pt    0.1310    0.6482    0.5202
Pt    0.2040    0.6662    0.5393
Pt    0.2045    0.6675    0.5750
Pt    0.0195    0.5379    0.5203
Pt    0.1312    0.5020    0.5205
Pt    0.0572    0.5200    0.5017
Pt    0.1120    0.6474    0.5023
Pt    0.0736    0.5770    0.5012
Pt    0.2059    0.7044    0.5019
Pt    0.0373    0.5012    0.5761
Pt    0.0941    0.5012    0.5202
Pt    0.0031    0.7241    0.6131
Pt    0.1327    0.5020    0.5578
Pt    0.1502    0.5026    0.6116
Pt    0.2228    0.6865    0.5012
Pt    0.0558    0.5958    0.5016
Pt    0.0747    0.6130    0.5029
Pt    0.0374    0.6156    0.5022
Pt    0.0555    0.6322    0.5012
Pt    0.2240    0.7230    0.5015
Pt    0.0371    0.5766    0.5015
Pt    0.0925    0.6324    0.5025
Pt    0.1298    0.6656    0.5014
Pt    0.1125    0.5024    0.6117
Pt    0.0937    0.5015    0.5934
Pt    0.1288    0.7045    0.5020
Pt    0.1305    0.5025    0.5941
Pt    0.1293    0.7433    0.5012
Pt    0.1137    0.5020    0.5021
Pt    0.0190    0.5961    0.5022
Pt    0.0377    0.5389    0.5013
Pt    0.1867    0.7240    0.5024
Pt    0.1662    0.6668    0.5014
Pt    0.0190    0.5197    0.5018
Pt    0.2232    0.6479    0.5012
Pt    0.2415    0.7414    0.5031
Pt    0.1670    0.7034    0.5013
Pt    0.0013    0.5770    0.5015
Pt    0.1679    0.6134    0.7411
Pt    0.1314    0.7218    0.6333
Pt    0.2408    0.5754    0.6671
Pt    0.1664    0.5753    0.7426
Pt    0.2431    0.5745    0.6284
Pt    0.1501    0.5209    0.6315
Pt    0.2427    0.7231    0.6323
Pt    0.2419    0.5383    0.7425
Pt    0.1871    0.5203    0.6295
Pt    0.2044    0.5382    0.6295
Pt    0.2040    0.5752    0.7418
Pt    0.0957    0.7222    0.7058
Pt    0.2417    0.5762    0.7036
Pt    0.1649    0.5763    0.7048
Pt    0.0952    0.7218    0.6685
Pt    0.2418    0.6476    0.6296
Pt    0.2042    0.5758    0.7047
Pt    0.1311    0.7257    0.6688
Pt    0.1670    0.5383    0.7423
Pt    0.0397    0.5201    0.6324
Pt    0.0378    0.6285    0.7038
Pt    0.0386    0.6300    0.7422
Pt    0.0387    0.6655    0.6675
Pt    0.0381    0.6661    0.7037
Pt    0.0385    0.6672    0.7419
Pt    0.0393    0.7025    0.6304
Pt    0.0395    0.7034    0.6677
Pt    0.0387    0.7037    0.7047
Pt    0.0378    0.7035    0.7416
Pt    0.0411    0.7404    0.6296
Pt    0.0383    0.7417    0.6690
Pt    0.0396    0.7412    0.7043
Pt    0.0376    0.7406    0.7425
Pt    0.0756    0.5192    0.6317
Pt    0.0748    0.6285    0.7403
Pt    0.0777    0.6646    0.7046
Pt    0.0741    0.6668    0.7424
Pt    0.0780    0.7013    0.6686
Pt    0.0767    0.7027    0.7053
Pt    0.0764    0.7038    0.7418
Pt    0.0758    0.7409    0.6325
Pt    0.0760    0.7410    0.6682
Pt    0.0759    0.7414    0.7044
Pt    0.0766    0.7396    0.7422
Pt    0.1134    0.5201    0.6304
Pt    0.1125    0.5199    0.6671
Pt    0.1118    0.5196    0.7427
Pt    0.1128    0.5940    0.7415
Pt    0.1105    0.6303    0.7417
Pt    0.1119    0.6662    0.7409
Pt    0.1150    0.7049    0.7042
Pt    0.1142    0.7036    0.7405
Pt    0.1132    0.7414    0.6314
Pt    0.1122    0.7428    0.6690
Pt    0.1139    0.7424    0.7043
Pt    0.1132    0.7409    0.7424
Pt    0.1481    0.5013    0.6498
Pt    0.1477    0.5202    0.6673
Pt    0.1468    0.5206    0.7045
Pt    0.1468    0.5192    0.7428
Pt    0.1476    0.5572    0.7046
Pt    0.1480    0.5567    0.7417
Pt    0.1473    0.5938    0.7403
Pt    0.1482    0.6299    0.7414
Pt    0.1495    0.7425    0.6318
Pt    0.0018    0.7043    0.7056
Pt    0.1846    0.5204    0.6669
Pt    0.1848    0.5201    0.7046
Pt    0.1866    0.5198    0.7423
Pt    0.1837    0.5582    0.6673
Pt    0.1848    0.5574    0.7058
Pt    0.1852    0.5578    0.7423
Pt    0.1859    0.5953    0.7057
Pt    0.1861    0.5946    0.7412
Pt    0.2226    0.5196    0.6283
Pt    0.2219    0.5207    0.6669
Pt    0.2227    0.5187    0.7040
Pt    0.2224    0.5203    0.7428
Pt    0.2232    0.5555    0.6302
Pt    0.2226    0.5558    0.6669
Pt    0.2231    0.5564    0.7049
Pt    0.2232    0.5571    0.7431
Pt    0.2235    0.5915    0.6293
Pt    0.2209    0.5946    0.6681
Pt    0.2239    0.5947    0.7028
Pt    0.2228    0.5944    0.7418
Pt    0.2226    0.6308    0.6306
Pt    0.2227    0.6294    0.6647
Pt    0.2204    0.6316    0.7422
Pt    0.2318    0.6718    0.6350
Pt    0.2228    0.7408    0.6315
Pt    0.2400    0.6140    0.7421
Pt    0.2402    0.6141    0.7027
Pt    0.1288    0.5382    0.7046
Pt    0.2032    0.5742    0.6673
Pt    0.2420    0.5373    0.7051
Pt    0.2045    0.5377    0.7428
Pt    0.2032    0.5396    0.7037
Pt    0.1659    0.5391    0.7054
Pt    0.2418    0.5368    0.6661
Pt    0.0031    0.7224    0.6489
Pt    0.1667    0.5391    0.6663
Pt    0.0388    0.6458    0.6859
Pt    0.0387    0.6481    0.7222
Pt    0.0382    0.6837    0.6481
Pt    0.0392    0.6845    0.6866
Pt    0.0390    0.6849    0.7217
Pt    0.0384    0.7220    0.6496
Pt    0.0378    0.7215    0.6868
Pt    0.0395    0.7234    0.7240
Pt    0.0752    0.6467    0.7229
Pt    0.0765    0.6832    0.6864
Pt    0.0745    0.6833    0.7244
Pt    0.0768    0.7213    0.6512
Pt    0.0767    0.7221    0.6873
Pt    0.0765    0.7218    0.7231
Pt    0.2402    0.6113    0.6672
Pt    0.2421    0.6114    0.6303
Pt    0.1125    0.6138    0.7219
Pt    0.1136    0.6478    0.7211
Pt    0.1133    0.6850    0.7220
Pt    0.1131    0.7225    0.6514
Pt    0.1131    0.7236    0.6877
Pt    0.1147    0.7231    0.7236
Pt    0.2417    0.5757    0.7422
Pt    0.1673    0.7237    0.6311
Pt    0.2012    0.5390    0.6674
Pt    0.1469    0.5373    0.6857
Pt    0.1464    0.5392    0.7244
Pt    0.1469    0.5748    0.7225
Pt    0.1504    0.6130    0.7217
Pt    0.1474    0.6494    0.7253
Pt    0.1497    0.7248    0.6508
Pt    0.1306    0.6120    0.7402
Pt    0.2046    0.6122    0.7041
Pt    0.1290    0.6470    0.7415
Pt    0.1853    0.5397    0.6483
Pt    0.1835    0.5395    0.6864
Pt    0.1852    0.5392    0.7238
Pt    0.1850    0.5757    0.6878
Pt    0.1843    0.5750    0.7225
Pt    0.1862    0.6131    0.7232
Pt    0.2407    0.5383    0.6291
Pt    0.1298    0.5756    0.7413
Pt    0.0955    0.7213    0.7406
Pt    0.2220    0.5380    0.6480
Pt    0.2236    0.5381    0.6860
Pt    0.2225    0.5377    0.7242
Pt    0.2225    0.5746    0.6490
Pt    0.2222    0.5746    0.6846
Pt    0.2234    0.5756    0.7231
Pt    0.2226    0.6112    0.6474
Pt    0.2216    0.6141    0.6853
Pt    0.2226    0.6133    0.7215
Pt    0.2275    0.6507    0.6509
Pt    0.0174    0.5936    0.6477
Pt    0.0218    0.6308    0.6467
Pt    0.0190    0.6276    0.6859
Pt    0.0203    0.6300    0.7235
Pt    0.0207    0.6653    0.6489
Pt    0.0200    0.6658    0.6860
Pt    0.0201    0.6671    0.7226
Pt    0.0213    0.7034    0.6484
Pt    0.0210    0.7037    0.6860
Pt    0.0197    0.7047    0.7230
Pt    0.0208    0.7407    0.6491
Pt    0.0207    0.7419    0.6854
Pt    0.0204    0.7408    0.7241
Pt    0.0554    0.6290    0.7228
Pt    0.0582    0.6647    0.6863
Pt    0.0563    0.6654    0.7232
Pt    0.0579    0.7023    0.6491
Pt    0.0590    0.7026    0.6863
Pt    0.0573    0.7037    0.7232
Pt    0.0576    0.7404    0.6500
Pt    0.0576    0.7406    0.6862
Pt    0.0578    0.7403    0.7252
Pt    0.0958    0.5188    0.6490
Pt    0.0940    0.6301    0.7225
Pt    0.0945    0.6663    0.7227
Pt    0.0963    0.7036    0.6868
Pt    0.0955    0.7032    0.7224
Pt    0.0946    0.7412    0.6498
Pt    0.0953    0.7412    0.6874
Pt    0.0949    0.7414    0.7232
Pt    0.1303    0.5213    0.6488
Pt    0.1281    0.5186    0.6869
Pt    0.1282    0.5190    0.7238
Pt    0.1280    0.5575    0.7231
Pt    0.1292    0.5933    0.7219
Pt    0.1323    0.6304    0.7219
Pt    0.1325    0.6693    0.7284
Pt    0.1310    0.7425    0.6486
Pt    0.1325    0.7413    0.7229
Pt    0.1673    0.5204    0.6495
Pt    0.1662    0.5199    0.6859
Pt    0.1658    0.5212    0.7244
Pt    0.1652    0.5558    0.6857
Pt    0.1658    0.5568    0.7235
Pt    0.1670    0.5930    0.7234
Pt    0.1680    0.6319    0.7233
Pt    0.2032    0.5193    0.6479
Pt    0.2037    0.5215    0.6864
Pt    0.2042    0.5206    0.7224
Pt    0.2046    0.5567    0.6493
Pt    0.2036    0.5574    0.6863
Pt    0.2044    0.5566    0.7241
Pt    0.2026    0.5939    0.6848
Pt    0.2048    0.5940    0.7231
Pt    0.2405    0.5188    0.6474
Pt    0.2422    0.5197    0.6854
Pt    0.2414    0.5197    0.7246
Pt    0.2414    0.5568    0.6485
Pt    0.2411    0.5568    0.6864
Pt    0.2421    0.5571    0.7219
Pt    0.2413    0.5923    0.6487
Pt    0.2409    0.5947    0.6850
Pt    0.2404    0.5941    0.7233
Pt    0.2415    0.6293    0.6468
Pt    0.2405    0.6301    0.7230
Pt    0.2033    0.6135    0.7409
Pt    0.0197    0.5399    0.6325
Pt    0.0181    0.5747    0.6308
Pt    0.0199    0.6122    0.6307
Pt    0.0211    0.6143    0.6658
Pt    0.0185    0.6123    0.7424
Pt    0.0196    0.6496    0.6287
Pt    0.0204    0.6471    0.6669
Pt    0.0198    0.6467    0.7033
Pt    0.0206    0.6481    0.7416
Pt    0.0197    0.6840    0.6302
Pt    0.0206    0.6853    0.6676
Pt    0.0204    0.6855    0.7049
Pt    0.0196    0.6846    0.7413
Pt    0.0208    0.7223    0.6311
Pt    0.0192    0.7222    0.6682
Pt    0.0193    0.7234    0.7042
Pt    0.0192    0.7220    0.7417
Pt    0.1285    0.5395    0.7417
Pt    0.0564    0.6475    0.7039
Pt    0.0571    0.6470    0.7427
Pt    0.0573    0.6844    0.6681
Pt    0.0582    0.6840    0.7048
Pt    0.0567    0.6845    0.7425
Pt    0.0580    0.7209    0.6318
Pt    0.0580    0.7215    0.6686
Pt    0.0571    0.7217    0.7062
Pt    0.0562    0.7217    0.7435
Pt    0.1319    0.7221    0.7419
Pt    0.0929    0.6111    0.7402
Pt    0.0932    0.6491    0.7415
Pt    0.0960    0.6859    0.7037
Pt    0.0950    0.6855    0.7412
Pt    0.0951    0.7219    0.6333
Pt    0.1674    0.5014    0.6298
Pt    0.0013    0.6304    0.6654
Pt    0.0017    0.7412    0.7055
Pt    0.1650    0.5027    0.7057
Pt    0.1472    0.5018    0.7235
Pt    0.0018    0.6851    0.6481
Pt    0.2225    0.5017    0.6478
Pt    0.0030    0.7427    0.6311
Pt    0.0014    0.7419    0.7431
Pt    0.1852    0.5013    0.7234
Pt    0.0014    0.5944    0.6301
Pt    0.0025    0.7034    0.6679
Pt    0.2232    0.5012    0.6862
Pt    0.0015    0.6857    0.7244
Pt    0.0012    0.6668    0.6670
Pt    0.0016    0.6650    0.7050
Pt    0.0017    0.7416    0.6667
Pt    0.1676    0.5021    0.7421
Pt    0.1854    0.5013    0.6492
Pt    0.1302    0.5022    0.6304
Pt    0.0022    0.6847    0.6871
Pt    0.2411    0.5019    0.6675
Pt    0.0020    0.7026    0.6292
Pt    0.1477    0.5013    0.6865
Pt    0.2036    0.5016    0.6685
Pt    0.0942    0.5015    0.6304
Pt    0.2225    0.5023    0.7243
Pt    0.1845    0.5020    0.6867
Pt    0.1665    0.5017    0.6678
Pt    0.0014    0.7413    0.8178
Pt    0.2425    0.6128    0.8513
Pt    0.1859    0.5011    0.7983
Pt    0.0943    0.7023    0.8722
Pt    0.2417    0.6152    0.8155
Pt    0.1302    0.7212    0.7798
Pt    0.2408    0.6129    0.7774
Pt    0.1299    0.6848    0.7814
Pt    0.2417    0.5774    0.8547
Pt    0.1645    0.6476    0.7795
Pt    0.2415    0.5762    0.8158
Pt    0.1668    0.6137    0.7791
Pt    0.0369    0.6290    0.7795
Pt    0.0387    0.6304    0.8174
Pt    0.0380    0.6659    0.7799
Pt    0.0390    0.6672    0.8185
Pt    0.0389    0.6664    0.8544
Pt    0.0385    0.7041    0.7801
Pt    0.0388    0.7042    0.8188
Pt    0.0394    0.7038    0.8547
Pt    0.0383    0.7414    0.7797
Pt    0.0396    0.7419    0.8175
Pt    0.0393    0.7419    0.8542
Pt    0.0729    0.6278    0.7789
Pt    0.0758    0.6664    0.7801
Pt    0.0766    0.6661    0.8180
Pt    0.0744    0.6656    0.8559
Pt    0.0745    0.7036    0.7804
Pt    0.0756    0.7026    0.8173
Pt    0.0761    0.7042    0.8546
Pt    0.0760    0.7406    0.7799
Pt    0.0769    0.7402    0.8165
Pt    0.0755    0.7420    0.8539
Pt    0.1118    0.5191    0.7799
Pt    0.1114    0.5927    0.7782
Pt    0.1098    0.6305    0.7792
Pt    0.1104    0.6285    0.8160
Pt    0.1115    0.6665    0.7807
Pt    0.1115    0.7024    0.7792
Pt    0.1124    0.7026    0.8173
Pt    0.1136    0.7396    0.7794
Pt    0.1133    0.7420    0.8184
Pt    0.1117    0.7406    0.8530
Pt    0.1481    0.5184    0.7806
Pt    0.1484    0.5194    0.8170
Pt    0.1480    0.5180    0.8531
Pt    0.1487    0.5568    0.7816
Pt    0.1473    0.5585    0.8178
Pt    0.1479    0.5941    0.7791
Pt    0.1479    0.5941    0.8163
Pt    0.1476    0.6298    0.7789
Pt    0.1469    0.6653    0.7796
Pt    0.1856    0.5204    0.7792
Pt    0.1857    0.5199    0.8175
Pt    0.1846    0.5196    0.8552
Pt    0.1847    0.5581    0.7797
Pt    0.1854    0.5576    0.8178
Pt    0.1850    0.5590    0.8538
Pt    0.1850    0.5956    0.7807
Pt    0.1841    0.5959    0.8160
Pt    0.1855    0.5966    0.8517
Pt    0.1848    0.6324    0.7805
Pt    0.2228    0.5200    0.7800
Pt    0.2229    0.5197    0.8168
Pt    0.2212    0.5203    0.8543
Pt    0.2227    0.5575    0.7797
Pt    0.2224    0.5583    0.8179
Pt    0.2225    0.5574    0.8537
Pt    0.2231    0.5943    0.7801
Pt    0.2224    0.5959    0.8169
Pt    0.2238    0.5961    0.8535
Pt    0.2225    0.6337    0.7764
Pt    0.2233    0.6324    0.8155
Pt    0.2042    0.5955    0.8708
Pt    0.0209    0.5025    0.8513
Pt    0.0013    0.7423    0.7800
Pt    0.0016    0.7030    0.8168
Pt    0.1668    0.5767    0.8178
Pt    0.2408    0.5766    0.7802
Pt    0.0026    0.6673    0.7804
Pt    0.2418    0.5395    0.8552
Pt    0.1662    0.5396    0.8538
Pt    0.2421    0.5389    0.8170
Pt    0.1286    0.6489    0.7784
Pt    0.2415    0.5400    0.7805
Pt    0.0051    0.5052    0.8719
Pt    0.1679    0.5799    0.8509
Pt    0.1669    0.5387    0.7798
Pt    0.1110    0.7027    0.8538
Pt    0.0368    0.6121    0.7613
Pt    0.0384    0.6469    0.7606
Pt    0.0379    0.6465    0.7969
Pt    0.0393    0.6480    0.8375
Pt    0.0377    0.6849    0.7606
Pt    0.0372    0.6852    0.7991
Pt    0.0380    0.6844    0.8377
Pt    0.0383    0.6852    0.8734
Pt    0.0370    0.7221    0.7617
Pt    0.0383    0.7232    0.7992
Pt    0.0387    0.7230    0.8361
Pt    0.0388    0.7235    0.8731
Pt    0.0750    0.6116    0.7590
Pt    0.0747    0.6473    0.7614
Pt    0.0739    0.6462    0.7976
Pt    0.0756    0.6857    0.7618
Pt    0.0750    0.6851    0.7990
Pt    0.0760    0.6842    0.8358
Pt    0.0752    0.6856    0.8723
Pt    0.0759    0.7222    0.7596
Pt    0.0763    0.7208    0.7984
Pt    0.0771    0.7215    0.8353
Pt    0.0764    0.7236    0.8738
Pt    0.1668    0.5392    0.8171
Pt    0.1126    0.5371    0.7626
Pt    0.1134    0.5746    0.7602
Pt    0.1108    0.6114    0.7604
Pt    0.1103    0.6103    0.7975
Pt    0.1108    0.6492    0.7603
Pt    0.1118    0.6492    0.7989
Pt    0.1139    0.6850    0.7594
Pt    0.1126    0.6836    0.7989
Pt    0.1133    0.7211    0.7597
Pt    0.1119    0.7216    0.7977
Pt    0.1122    0.7210    0.8358
Pt    0.2043    0.6156    0.8168
Pt    0.1309    0.6137    0.8169
Pt    0.2045    0.6133    0.7789
Pt    0.1478    0.5367    0.7623
Pt    0.1485    0.5393    0.8002
Pt    0.1479    0.5402    0.8368
Pt    0.1476    0.5752    0.7599
Pt    0.1479    0.5754    0.7992
Pt    0.1494    0.6130    0.7590
Pt    0.1496    0.6127    0.7984
Pt    0.1499    0.6502    0.7569
Pt    0.1468    0.6481    0.7975
Pt    0.1300    0.7224    0.8167
Pt    0.2050    0.5769    0.8536
Pt    0.0027    0.5233    0.8541
Pt    0.2048    0.5775    0.8159
Pt    0.1855    0.5390    0.7611
Pt    0.1854    0.5392    0.7983
Pt    0.1846    0.5387    0.8361
Pt    0.1845    0.5394    0.8719
Pt    0.1855    0.5764    0.7608
Pt    0.1845    0.5773    0.8001
Pt    0.1876    0.5783    0.8341
Pt    0.1850    0.5778    0.8710
Pt    0.1855    0.6129    0.7610
Pt    0.1857    0.6153    0.7978
Pt    0.2034    0.5765    0.7783
Pt    0.1659    0.5756    0.7800
Pt    0.2032    0.5387    0.8545
Pt    0.0022    0.7231    0.8368
Pt    0.2232    0.5388    0.7614
Pt    0.2224    0.5395    0.7986
Pt    0.2223    0.5391    0.8361
Pt    0.2238    0.5396    0.8732
Pt    0.2225    0.5762    0.7610
Pt    0.2230    0.5761    0.7988
Pt    0.2222    0.5777    0.8352
Pt    0.2230    0.5769    0.8719
Pt    0.2220    0.6130    0.7598
Pt    0.2216    0.6138    0.7975
Pt    0.2238    0.6143    0.8345
Pt    0.0181    0.6301    0.7611
Pt    0.0193    0.6290    0.7990
Pt    0.0204    0.6313    0.8355
Pt    0.0203    0.6660    0.7604
Pt    0.0215    0.6662    0.7995
Pt    0.0199    0.6650    0.8371
Pt    0.0198    0.6662    0.8729
Pt    0.0193    0.7036    0.7604
Pt    0.0207    0.7043    0.7991
Pt    0.0191    0.7042    0.8365
Pt    0.0190    0.7041    0.8741
Pt    0.0200    0.7411    0.7611
Pt    0.0194    0.7409    0.7989
Pt    0.0207    0.7425    0.8350
Pt    0.0219    0.7425    0.8735
Pt    0.0560    0.6285    0.7603
Pt    0.0555    0.6282    0.7993
Pt    0.0572    0.6670    0.7605
Pt    0.0569    0.6673    0.7975
Pt    0.0581    0.6659    0.8358
Pt    0.0561    0.6659    0.8730
Pt    0.0566    0.7040    0.7616
Pt    0.0570    0.7037    0.7988
Pt    0.0575    0.7035    0.8368
Pt    0.0576    0.7049    0.8737
Pt    0.0571    0.7414    0.7612
Pt    0.0576    0.7407    0.7986
Pt    0.0586    0.7413    0.8344
Pt    0.0568    0.7427    0.8734
Pt    0.0936    0.5928    0.7593
Pt    0.0925    0.6292    0.7593
Pt    0.0922    0.6286    0.7979
Pt    0.0929    0.6659    0.7606
Pt    0.0938    0.6666    0.7986
Pt    0.0943    0.7030    0.7600
Pt    0.0953    0.7011    0.7992
Pt    0.0948    0.7023    0.8348
Pt    0.0952    0.7414    0.7618
Pt    0.0943    0.7404    0.7976
Pt    0.0930    0.7412    0.8359
Pt    0.0938    0.7422    0.8721
Pt    0.1294    0.5177    0.7625
Pt    0.1305    0.5190    0.7994
Pt    0.1311    0.5198    0.8345
Pt    0.1301    0.5554    0.7617
Pt    0.1303    0.5585    0.7990
Pt    0.1304    0.5950    0.7617
Pt    0.1293    0.5919    0.7981
Pt    0.1297    0.6288    0.7610
Pt    0.1295    0.6295    0.7983
Pt    0.1304    0.6665    0.7599
Pt    0.1304    0.7033    0.7615
Pt    0.1306    0.7039    0.7982
Pt    0.1326    0.7395    0.7606
Pt    0.1307    0.7404    0.7982
Pt    0.1672    0.5193    0.7606
Pt    0.1662    0.5212    0.7981
Pt    0.1663    0.5209    0.8363
Pt    0.1659    0.5202    0.8723
Pt    0.1661    0.5565    0.7600
Pt    0.1673    0.5570    0.7993
Pt    0.1651    0.5587    0.8363
Pt    0.1668    0.5585    0.8715
Pt    0.1659    0.5941    0.7588
Pt    0.1654    0.5946    0.7985
Pt    0.1678    0.6313    0.7591
Pt    0.2049    0.5197    0.7613
Pt    0.2043    0.5206    0.7992
Pt    0.2043    0.5210    0.8350
Pt    0.2035    0.5199    0.8729
Pt    0.2045    0.5578    0.7614
Pt    0.2040    0.5592    0.7980
Pt    0.2031    0.5583    0.8360
Pt    0.2032    0.5574    0.8722
Pt    0.2040    0.5945    0.7605
Pt    0.2034    0.5956    0.7990
Pt    0.2043    0.5972    0.8347
Pt    0.2020    0.6336    0.7611
Pt    0.2061    0.6334    0.7948
Pt    0.2416    0.5201    0.7622
Pt    0.2416    0.5222    0.7991
Pt    0.2407    0.5213    0.8368
Pt    0.2398    0.5202    0.8725
Pt    0.2411    0.5577    0.7619
Pt    0.2419    0.5575    0.7997
Pt    0.2404    0.5593    0.8358
Pt    0.2421    0.5585    0.8738
Pt    0.2406    0.5940    0.7599
Pt    0.2411    0.5964    0.7976
Pt    0.2419    0.5946    0.8338
Pt    0.2421    0.5954    0.8723
Pt    0.2406    0.6328    0.7594
Pt    0.2407    0.6329    0.7959
Pt    0.2409    0.7400    0.8330
Pt    0.2421    0.7413    0.8703
Pt    0.1290    0.6114    0.7810
Pt    0.0170    0.6125    0.7800
Pt    0.0195    0.6486    0.7803
Pt    0.0190    0.6485    0.8166
Pt    0.0201    0.6486    0.8559
Pt    0.0198    0.6848    0.7798
Pt    0.0198    0.6855    0.8187
Pt    0.0178    0.6845    0.8551
Pt    0.0197    0.7222    0.7806
Pt    0.0195    0.7230    0.8179
Pt    0.0207    0.7240    0.8545
Pt    0.0557    0.6478    0.7784
Pt    0.0566    0.6490    0.8170
Pt    0.0552    0.6850    0.7793
Pt    0.0557    0.6852    0.8168
Pt    0.0573    0.6852    0.8543
Pt    0.0568    0.7217    0.7799
Pt    0.0581    0.7223    0.8171
Pt    0.0578    0.7230    0.8550
Pt    0.0925    0.6115    0.7786
Pt    0.0929    0.6475    0.7800
Pt    0.0929    0.6468    0.8163
Pt    0.0936    0.6854    0.7794
Pt    0.0952    0.6819    0.8179
Pt    0.0934    0.6832    0.8543
Pt    0.0942    0.7208    0.7785
Pt    0.0958    0.7229    0.8171
Pt    0.0951    0.7225    0.8552
Pt    0.2038    0.5405    0.8171
Pt    0.2037    0.5393    0.7796
Pt    0.1306    0.5378    0.7816
Pt    0.1298    0.5393    0.8194
Pt    0.1300    0.5743    0.7784
Pt    0.0041    0.5042    0.8337
Pt    0.0017    0.6853    0.7601
Pt    0.0014    0.6844    0.8736
Pt    0.0024    0.5031    0.7957
Pt    0.0027    0.7425    0.8543
Pt    0.2404    0.5014    0.8537
Pt    0.0029    0.7231    0.8720
Pt    0.2219    0.5016    0.8360
Pt    0.2422    0.5017    0.8174
Pt    0.2423    0.5014    0.7809
Pt    0.2235    0.5014    0.7989
Pt    0.1846    0.5012    0.8365
Pt    0.2044    0.5025    0.7805
Pt    0.0016    0.6856    0.7993
Pt    0.0021    0.7042    0.7799
Pt    0.1673    0.5016    0.8162
Pt    0.2039    0.5015    0.8177
Pt    0.0353    0.6679    0.9979
Pt    0.2418    0.7230    0.9606
Pt    0.0368    0.5213    0.9631
Pt    0.0383    0.5567    0.9629
Pt    0.0365    0.6308    0.9614
Pt    0.0382    0.6673    0.8921
Pt    0.0381    0.6676    0.9258
Pt    0.0369    0.6659    0.9630
Pt    0.0371    0.7065    0.8909
Pt    0.0386    0.7057    0.9274
Pt    0.0369    0.7052    0.9629
Pt    0.0376    0.7435    0.8934
Pt    0.0377    0.7412    0.9277
Pt    0.0736    0.5561    0.9634
Pt    0.0752    0.5947    0.9618
Pt    0.0746    0.6309    0.9619
Pt    0.0753    0.6673    0.8893
Pt    0.0755    0.6689    0.9247
Pt    0.0737    0.6686    0.9621
Pt    0.0770    0.7054    0.8900
Pt    0.0753    0.7058    0.9266
Pt    0.0743    0.7073    0.9626
Pt    0.0744    0.7448    0.9621
Pt    0.1110    0.5565    0.9620
Pt    0.1112    0.5940    0.9620
Pt    0.1111    0.6324    0.9623
Pt    0.1125    0.6669    0.9252
Pt    0.1124    0.6689    0.9618
Pt    0.1123    0.7057    0.9267
Pt    0.1124    0.7055    0.9630
Pt    0.1490    0.5185    0.9626
Pt    0.1485    0.5564    0.9261
Pt    0.1490    0.5554    0.9610
Pt    0.1482    0.5926    0.9258
Pt    0.1493    0.5933    0.9630
Pt    0.1489    0.6296    0.9619
Pt    0.1508    0.6673    0.9606
Pt    0.1498    0.7048    0.9611
Pt    0.1829    0.5186    0.8914
Pt    0.1859    0.5192    0.9252
Pt    0.1864    0.5177    0.9606
Pt    0.1845    0.5579    0.8895
Pt    0.1845    0.5566    0.9248
Pt    0.1870    0.5558    0.9622
Pt    0.1848    0.5937    0.9266
Pt    0.1873    0.5926    0.9627
Pt    0.1873    0.6304    0.9626
Pt    0.1876    0.6669    0.9609
Pt    0.1872    0.7033    0.9627
Pt    0.2230    0.5191    0.8893
Pt    0.2240    0.5207    0.9241
Pt    0.2243    0.5583    0.8911
Pt    0.2246    0.5576    0.9255
Pt    0.2248    0.5546    0.9624
Pt    0.2228    0.5954    0.8904
Pt    0.2241    0.5955    0.9242
Pt    0.2250    0.5947    0.9627
Pt    0.2247    0.6299    0.9627
Pt    0.2245    0.7051    0.9618
Pt    0.2235    0.7416    0.9634
Pt    0.1320    0.6114    0.9998
Pt    0.1872    0.7048    0.9991
Pt    0.2422    0.5747    0.9613
Pt    0.2415    0.5403    0.9250
Pt    0.2438    0.5378    0.8901
Pt    0.0393    0.5380    0.9809
Pt    0.0382    0.5761    0.9820
Pt    0.0360    0.6108    0.9798
Pt    0.0377    0.6490    0.9431
Pt    0.0362    0.6495    0.9813
Pt    0.0389    0.6872    0.9084
Pt    0.0368    0.6863    0.9448
Pt    0.0362    0.6876    0.9815
Pt    0.0376    0.7246    0.9093
Pt    0.0364    0.7237    0.9452
Pt    0.0370    0.7262    0.9815
Pt    0.0758    0.5367    0.9798
Pt    0.0761    0.5762    0.9808
Pt    0.0740    0.6118    0.9816
Pt    0.0743    0.6501    0.9440
Pt    0.0753    0.6505    0.9804
Pt    0.0777    0.6869    0.9067
Pt    0.0748    0.6874    0.9431
Pt    0.0744    0.6882    0.9800
Pt    0.0757    0.7241    0.9082
Pt    0.0761    0.7269    0.9443
Pt    0.0733    0.7268    0.9806
Pt    0.1116    0.5376    0.9808
Pt    0.1127    0.5737    0.9830
Pt    0.1118    0.6122    0.9440
Pt    0.1138    0.6120    0.9811
Pt    0.1121    0.6499    0.9426
Pt    0.1115    0.6511    0.9797
Pt    0.1132    0.6862    0.9434
Pt    0.1132    0.6871    0.9802
Pt    0.1117    0.7233    0.9463
Pt    0.1122    0.7238    0.9804
Pt    0.2050    0.7222    0.9620
Pt    0.1478    0.5359    0.9442
Pt    0.1496    0.5361    0.9809
Pt    0.1485    0.5740    0.9437
Pt    0.1483    0.5739    0.9807
Pt    0.1472    0.6119    0.9429
Pt    0.1501    0.6125    0.9821
Pt    0.1487    0.6483    0.9432
Pt    0.1498    0.6499    0.9797
Pt    0.1509    0.6868    0.9811
Pt    0.1509    0.7244    0.9799
Pt    0.1846    0.5383    0.9070
Pt    0.1868    0.5383    0.9433
Pt    0.1871    0.5354    0.9797
Pt    0.1841    0.5773    0.9067
Pt    0.1864    0.5751    0.9451
Pt    0.1865    0.5738    0.9808
Pt    0.1880    0.6119    0.9439
Pt    0.1871    0.6114    0.9800
Pt    0.1864    0.6489    0.9798
Pt    0.1883    0.6849    0.9803
Pt    0.1871    0.7236    0.9803
Pt    0.2239    0.5385    0.9068
Pt    0.2236    0.5383    0.9438
Pt    0.2223    0.5366    0.9796
Pt    0.2250    0.5769    0.9082
Pt    0.2246    0.5769    0.9419
Pt    0.2257    0.5768    0.9811
Pt    0.2237    0.6122    0.9424
Pt    0.2254    0.6126    0.9826
Pt    0.2243    0.6489    0.9791
Pt    0.2257    0.6851    0.9789
Pt    0.2234    0.7233    0.9804
Pt    0.0199    0.5197    0.9823
Pt    0.0188    0.5581    0.9816
Pt    0.0189    0.5928    0.9805
Pt    0.0174    0.6294    0.9814
Pt    0.0185    0.6668    0.9457
Pt    0.0169    0.6685    0.9804
Pt    0.0192    0.7062    0.9103
Pt    0.0188    0.7055    0.9443
Pt    0.0184    0.7064    0.9803
Pt    0.0557    0.5195    0.9805
Pt    0.0560    0.5577    0.9822
Pt    0.0556    0.5941    0.9814
Pt    0.0555    0.6302    0.9441
Pt    0.0546    0.6310    0.9813
Pt    0.0571    0.6672    0.9075
Pt    0.0557    0.6688    0.9446
Pt    0.0556    0.6685    0.9812
Pt    0.0573    0.7055    0.9084
Pt    0.0571    0.7089    0.9449
Pt    0.0552    0.7069    0.9810
Pt    0.0557    0.7430    0.9438
Pt    0.0559    0.7457    0.9815
Pt    0.0944    0.5175    0.9841
Pt    0.0928    0.5573    0.9806
Pt    0.0921    0.5966    0.9445
Pt    0.0936    0.5935    0.9819
Pt    0.0944    0.6311    0.9434
Pt    0.0935    0.6304    0.9807
Pt    0.0940    0.6688    0.9081
Pt    0.0934    0.6674    0.9435
Pt    0.0930    0.6694    0.9805
Pt    0.0955    0.7069    0.9084
Pt    0.0938    0.7054    0.9451
Pt    0.0934    0.7061    0.9823
Pt    0.0943    0.7432    0.9807
Pt    0.1291    0.5172    0.9798
Pt    0.1295    0.5553    0.9449
Pt    0.1306    0.5552    0.9800
Pt    0.1296    0.5914    0.9445
Pt    0.1314    0.5925    0.9803
Pt    0.1297    0.6316    0.9429
Pt    0.1304    0.6316    0.9814
Pt    0.1319    0.6687    0.9424
Pt    0.1319    0.6687    0.9800
Pt    0.1309    0.7043    0.9421
Pt    0.1320    0.7056    0.9809
Pt    0.1309    0.7421    0.9809
Pt    0.1678    0.5193    0.9438
Pt    0.1693    0.5175    0.9815
Pt    0.1660    0.5571    0.9073
Pt    0.1667    0.5558    0.9438
Pt    0.1678    0.5545    0.9819
Pt    0.1679    0.5944    0.9076
Pt    0.1673    0.5931    0.9441
Pt    0.1670    0.5930    0.9816
Pt    0.1685    0.6297    0.9423
Pt    0.1681    0.6304    0.9804
Pt    0.1684    0.6650    0.9439
Pt    0.1684    0.6675    0.9798
Pt    0.1683    0.7060    0.9797
Pt    0.2040    0.5209    0.9073
Pt    0.2050    0.5189    0.9418
Pt    0.2050    0.5166    0.9800
Pt    0.2034    0.5580    0.9072
Pt    0.2068    0.5580    0.9451
Pt    0.2052    0.5553    0.9807
Pt    0.2040    0.5937    0.9077
Pt    0.2065    0.5939    0.9444
Pt    0.2060    0.5934    0.9810
Pt    0.2068    0.6310    0.9429
Pt    0.2059    0.6310    0.9809
Pt    0.2068    0.6676    0.9796
Pt    0.2057    0.7031    0.9810
Pt    0.2047    0.7402    0.9810
Pt    0.2425    0.5571    0.9430
Pt    0.2417    0.5556    0.9809
Pt    0.2438    0.5949    0.9805
Pt    0.2428    0.6305    0.9822
Pt    0.2424    0.7045    0.9808
Pt    0.2421    0.7418    0.9450
Pt    0.2411    0.7416    0.9821
Pt    0.0364    0.7439    0.9999
Pt    0.0196    0.5388    0.9638
Pt    0.0182    0.6483    0.9619
Pt    0.0193    0.6851    0.8916
Pt    0.0198    0.6857    0.9267
Pt    0.0175    0.6868    0.9627
Pt    0.0190    0.7248    0.8914
Pt    0.0183    0.7253    0.9262
Pt    0.0562    0.5384    0.9627
Pt    0.0568    0.5752    0.9640
Pt    0.0548    0.6122    0.9621
Pt    0.0566    0.6498    0.9260
Pt    0.0555    0.6473    0.9634
Pt    0.0584    0.6859    0.8906
Pt    0.0571    0.6874    0.9259
Pt    0.0554    0.6878    0.9633
Pt    0.0565    0.7240    0.8920
Pt    0.0571    0.7250    0.9262
Pt    0.0543    0.7274    0.9628
Pt    0.0928    0.5751    0.9616
Pt    0.0935    0.6133    0.9625
Pt    0.0945    0.6494    0.9253
Pt    0.0921    0.6497    0.9618
Pt    0.0953    0.6871    0.9252
Pt    0.0935    0.6871    0.9621
Pt    0.0162    0.5743    0.9990
Pt    0.0935    0.7240    0.9282
Pt    0.0922    0.7249    0.9624
Pt    0.1302    0.5363    0.9617
Pt    0.1299    0.5735    0.9626
Pt    0.1303    0.6115    0.9624
Pt    0.1306    0.6484    0.9612
Pt    0.1323    0.6871    0.9602
Pt    0.1315    0.7225    0.9624
Pt    0.1647    0.5388    0.8884
Pt    0.1659    0.5369    0.9247
Pt    0.1685    0.5367    0.9626
Pt    0.1647    0.5770    0.8884
Pt    0.1661    0.5742    0.9248
Pt    0.1682    0.5736    0.9629
Pt    0.1670    0.6116    0.9258
Pt    0.1687    0.6118    0.9618
Pt    0.1679    0.6475    0.9619
Pt    0.1694    0.6858    0.9604
Pt    0.2063    0.6861    0.9618
Pt    0.2031    0.5397    0.8897
Pt    0.2043    0.5394    0.9253
Pt    0.2050    0.5366    0.9617
Pt    0.2037    0.5761    0.8888
Pt    0.2054    0.5753    0.9263
Pt    0.2068    0.5758    0.9637
Pt    0.2036    0.6116    0.9255
Pt    0.2061    0.6126    0.9614
Pt    0.2056    0.6488    0.9607
Pt    0.1693    0.6874    0.9988
Pt    0.1315    0.6512    0.9979
Pt    0.1684    0.6500    0.9986
Pt    0.2447    0.6857    0.9994
Pt    0.2437    0.6117    0.0003
Pt    0.0166    0.6483    0.9997
Pt    0.0934    0.6490    0.9984
Pt    0.0558    0.6865    0.9993
Pt    0.2054    0.5359    0.9988
Pt    0.0569    0.5386    0.9988
Pt    0.2060    0.5741    0.9989
Pt    0.0563    0.5744    0.0009
Pt    0.1686    0.5354    0.0000
Pt    0.1309    0.5745    0.0003
Pt    0.0357    0.6303    0.9990
Pt    0.1140    0.7426    0.9988
Pt    0.0940    0.5369    0.9990
Pt    0.0193    0.5017    0.9626
Pt    0.1124    0.6685    0.9981
Pt    0.0373    0.7064    0.9988
Pt    0.1872    0.6303    0.9991
Pt    0.1684    0.6127    0.9994
Pt    0.2423    0.5374    0.9987
Pt    0.0372    0.5560    0.0006
Pt    0.0921    0.6878    0.9997
Pt    0.2246    0.5929    0.0002
Pt    0.0951    0.6128    0.9986
Pt    0.0751    0.7450    0.9995
Pt    0.1124    0.5167    1.0000
Pt    0.1873    0.5935    0.9992
Pt    0.1499    0.7062    0.9992
Pt    0.1134    0.5943    0.9995
Pt    0.2247    0.6321    0.9997
Pt    0.1315    0.7235    0.9992
Pt    0.0740    0.5932    0.9996
Pt    0.1129    0.7064    0.9992
Pt    0.0748    0.6309    0.9981
Pt    0.2058    0.6503    0.9974
Pt    0.1124    0.6311    0.9988
Pt    0.1499    0.5929    0.0007
Pt    0.0740    0.5190    0.9991
Pt    0.2056    0.7233    0.9999
Pt    0.1489    0.7434    0.9994
Pt    0.0556    0.6121    0.9996
Pt    0.0755    0.5571    0.9986
Pt    0.2234    0.7042    0.9990
Pt    0.2454    0.6489    0.9978
Pt    0.0947    0.5752    0.0001
Pt    0.1872    0.5162    0.9990
Pt    0.2244    0.5172    0.9990
Pt    0.2234    0.5562    0.9988
Pt    0.0381    0.5018    0.9816
Pt    0.0013    0.5029    0.9439
Pt    0.1314    0.6873    0.9996
Pt    0.1511    0.6683    1.0000
Pt    0.0356    0.5940    0.9994
Pt    0.1313    0.5369    0.9985
Pt    0.1487    0.6316    0.9996
Pt    0.1116    0.5543    0.9998
Pt    0.1496    0.5555    0.9991
Pt    0.1686    0.7248    0.9998
Pt    0.0937    0.7254    0.9994
Pt    0.2433    0.5749    0.9992
Pt    0.0386    0.5195    0.0002
Pt    0.0175    0.6889    0.9998
Pt    0.0181    0.7237    0.9992
Pt    0.0168    0.6111    0.0002
Pt    0.2054    0.6115    0.9988
Pt    0.2258    0.6670    0.9979
Pt    0.2221    0.7421    0.0005
Pt    0.0557    0.6498    0.9993
Pt    0.1871    0.6678    0.9993
Pt    0.2060    0.6858    0.9992
Pt    0.1674    0.5741    0.9987
Pt    0.1854    0.5541    0.9991
Pt    0.1498    0.5173    0.9990
Pt    0.0186    0.5387    0.9992
Pt    0.0550    0.7262    0.9987
Pt    0.0737    0.7066    0.9995
Pt    0.2418    0.7235    0.0012
Pt    0.0749    0.6694    0.9999
Pt    0.0115    0.7480    0.8954
Pt    0.2499    0.5094    0.8947
Pt    0.0014    0.5202    0.9646
Pt    0.0018    0.7046    0.8919
Pt    0.0563    0.0001    0.0567
Pt    0.0391    0.9255    0.0017
Pt    0.0926    0.0001    0.0572
Pt    0.2410    0.7970    0.0012
Pt    0.2406    0.7968    0.0365
Pt    0.0197    0.9999    0.0565
Pt    0.2441    0.7621    0.1120
Pt    0.2436    0.7609    0.0773
Pt    0.0018    0.9261    0.0778
Pt    0.2431    0.7607    0.0400
Pt    0.0934    0.9819    0.0757
Pt    0.1338    0.9843    0.0027
Pt    0.0961    0.9813    0.0385
Pt    0.0363    0.7798    0.0369
Pt    0.0359    0.7786    0.0744
Pt    0.0363    0.7791    0.1127
Pt    0.0368    0.8176    0.0392
Pt    0.0357    0.8134    0.0753
Pt    0.0358    0.8165    0.1115
Pt    0.1145    0.9643    0.0017
Pt    0.0372    0.8530    0.0385
Pt    0.0371    0.8514    0.0758
Pt    0.1307    0.7615    0.0378
Pt    0.0379    0.8884    0.0383
Pt    0.0389    0.8889    0.0772
Pt    0.0940    0.9439    0.1128
Pt    0.0377    0.9250    0.0395
Pt    0.0385    0.9253    0.0769
Pt    0.0373    0.9268    0.1138
Pt    0.1306    0.7609    0.1132
Pt    0.0377    0.9627    0.0384
Pt    0.0372    0.9634    0.0760
Pt    0.0374    0.9654    0.1128
Pt    0.0921    0.9825    0.1132
Pt    0.0730    0.7804    0.0367
Pt    0.0757    0.7799    0.0737
Pt    0.0748    0.7792    0.1108
Pt    0.0754    0.8176    0.0388
Pt    0.0745    0.8157    0.0749
Pt    0.0734    0.8158    0.1125
Pt    0.0741    0.8522    0.0383
Pt    0.0751    0.8527    0.0755
Pt    0.1690    0.7973    0.0754
Pt    0.0769    0.8879    0.0386
Pt    0.0755    0.8889    0.0763
Pt    0.1689    0.7614    0.1115
Pt    0.0764    0.9265    0.0388
Pt    0.0754    0.9267    0.0778
Pt    0.0564    0.0010    0.0193
Pt    0.0747    0.9615    0.0378
Pt    0.0753    0.9636    0.0760
Pt    0.0734    0.9638    0.1134
Pt    0.1121    0.7793    0.0362
Pt    0.1134    0.7808    0.0744
Pt    0.1123    0.7812    0.1117
Pt    0.1127    0.8158    0.0378
Pt    0.1129    0.8162    0.0746
Pt    0.0553    0.9086    0.1123
Pt    0.1139    0.9255    0.0377
Pt    0.0932    0.9457    0.0757
Pt    0.1130    0.9626    0.0390
Pt    0.1116    0.9631    0.0758
Pt    0.1118    0.9639    0.1121
Pt    0.1490    0.7797    0.0372
Pt    0.1491    0.7806    0.0749
Pt    0.1488    0.7805    0.1115
Pt    0.1675    0.7625    0.0751
Pt    0.1493    0.9669    0.1130
Pt    0.1857    0.7806    0.0374
Pt    0.1869    0.7804    0.0758
Pt    0.1870    0.7814    0.1130
Pt    0.1678    0.7621    0.0380
Pt    0.2232    0.7790    0.0369
Pt    0.2244    0.7805    0.0762
Pt    0.2258    0.7819    0.1123
Pt    0.0961    0.9444    0.0390
Pt    0.2046    0.7994    0.0745
Pt    0.2061    0.7980    0.0382
Pt    0.1287    0.9831    0.1119
Pt    0.2049    0.7625    0.1134
Pt    0.2056    0.7629    0.0766
Pt    0.2051    0.7610    0.0381
Pt    0.1306    0.7602    0.0747
Pt    0.1309    0.9820    0.0752
Pt    0.2404    0.9088    0.0038
Pt    0.1684    0.9866    0.1108
Pt    0.1691    0.8004    0.1113
Pt    0.0018    0.9449    0.0582
Pt    0.0378    0.7620    0.0187
Pt    0.0372    0.7605    0.0565
Pt    0.0353    0.7605    0.0935
Pt    0.0353    0.7970    0.0556
Pt    0.0367    0.7954    0.0936
Pt    0.0363    0.8355    0.0206
Pt    0.0368    0.8336    0.0591
Pt    0.0371    0.8328    0.0943
Pt    0.0376    0.8705    0.0197
Pt    0.0379    0.8705    0.0589
Pt    0.0384    0.9072    0.0205
Pt    0.0384    0.9070    0.0580
Pt    0.0377    0.9070    0.0955
Pt    0.0395    0.9433    0.0196
Pt    0.0381    0.9455    0.0575
Pt    0.0377    0.9447    0.0940
Pt    0.0387    0.9822    0.0204
Pt    0.0383    0.9814    0.0573
Pt    0.0381    0.9818    0.0943
Pt    0.0741    0.7619    0.0186
Pt    0.0746    0.7612    0.0549
Pt    0.0753    0.7607    0.0925
Pt    0.0753    0.8002    0.0195
Pt    0.0755    0.7975    0.0550
Pt    0.0746    0.7971    0.0931
Pt    0.0751    0.8341    0.0576
Pt    0.0753    0.8328    0.0930
Pt    0.0762    0.8698    0.0199
Pt    0.0769    0.8700    0.0583
Pt    0.0760    0.9074    0.0200
Pt    0.0755    0.9057    0.0565
Pt    0.0751    0.9079    0.0941
Pt    0.0761    0.9442    0.0204
Pt    0.0759    0.9438    0.0571
Pt    0.0752    0.9444    0.0953
Pt    0.0754    0.9819    0.0200
Pt    0.0750    0.9811    0.0564
Pt    0.0745    0.9812    0.0949
Pt    0.1115    0.7619    0.0176
Pt    0.1115    0.7609    0.0543
Pt    0.1132    0.7606    0.0935
Pt    0.1107    0.7975    0.0191
Pt    0.1119    0.7972    0.0560
Pt    0.1119    0.7997    0.0944
Pt    0.1148    0.9068    0.0195
Pt    0.1105    0.9268    0.0758
Pt    0.1138    0.9449    0.0199
Pt    0.1132    0.9436    0.0579
Pt    0.1111    0.9462    0.0945
Pt    0.1146    0.9814    0.0205
Pt    0.1131    0.9822    0.0574
Pt    0.1114    0.9823    0.0939
Pt    0.1495    0.7613    0.0178
Pt    0.1498    0.7615    0.0558
Pt    0.1498    0.7614    0.0942
Pt    0.1484    0.7987    0.0564
Pt    0.1495    0.7988    0.0933
Pt    0.1488    0.9845    0.0940
Pt    0.1854    0.7618    0.0188
Pt    0.1867    0.7627    0.0575
Pt    0.1876    0.7630    0.0941
Pt    0.1867    0.7990    0.0936
Pt    0.2219    0.7605    0.0190
Pt    0.2241    0.7607    0.0563
Pt    0.2238    0.7623    0.0955
Pt    0.2233    0.8001    0.0183
Pt    0.2241    0.7978    0.0562
Pt    0.0173    0.7785    0.0557
Pt    0.0154    0.7793    0.0934
Pt    0.0185    0.8160    0.0566
Pt    0.0190    0.8150    0.0932
Pt    0.0181    0.8526    0.0201
Pt    0.0196    0.8517    0.0583
Pt    0.0175    0.8878    0.0201
Pt    0.0201    0.8888    0.0591
Pt    0.0196    0.8894    0.0952
Pt    0.0191    0.9245    0.0200
Pt    0.0205    0.9260    0.0586
Pt    0.0195    0.9254    0.0954
Pt    0.0203    0.9624    0.0204
Pt    0.0196    0.9641    0.0573
Pt    0.0186    0.9632    0.0942
Pt    0.0559    0.7812    0.0180
Pt    0.0548    0.7804    0.0557
Pt    0.0549    0.7778    0.0906
Pt    0.0581    0.8198    0.0201
Pt    0.0553    0.8158    0.0568
Pt    0.0553    0.8151    0.0928
Pt    0.0583    0.8496    0.0189
Pt    0.0570    0.8528    0.0580
Pt    0.0577    0.8882    0.0195
Pt    0.0578    0.8881    0.0584
Pt    0.0571    0.9248    0.0196
Pt    0.0569    0.9258    0.0568
Pt    0.0559    0.9265    0.0950
Pt    0.0569    0.9614    0.0193
Pt    0.0563    0.9629    0.0574
Pt    0.0565    0.9626    0.0941
Pt    0.0922    0.7804    0.0170
Pt    0.0928    0.7788    0.0555
Pt    0.0946    0.7797    0.0923
Pt    0.0939    0.8170    0.0206
Pt    0.0947    0.8165    0.0559
Pt    0.0956    0.8180    0.0951
Pt    0.0941    0.8889    0.0204
Pt    0.0950    0.9253    0.0205
Pt    0.0939    0.9263    0.0561
Pt    0.0945    0.9639    0.0191
Pt    0.0925    0.9631    0.0559
Pt    0.0930    0.9634    0.0957
Pt    0.1297    0.7805    0.0177
Pt    0.1311    0.7793    0.0554
Pt    0.1304    0.7802    0.0933
Pt    0.1327    0.9628    0.0207
Pt    0.1316    0.9622    0.0577
Pt    0.1319    0.9634    0.0921
Pt    0.1675    0.7813    0.0557
Pt    0.1676    0.7802    0.0941
Pt    0.2039    0.7793    0.0198
Pt    0.2049    0.7806    0.0572
Pt    0.2056    0.7820    0.0957
Pt    0.2417    0.7788    0.0192
Pt    0.2413    0.7796    0.0570
Pt    0.2389    0.9286    0.0202
Pt    0.0184    0.7608    0.0375
Pt    0.0184    0.7606    0.0752
Pt    0.0160    0.7622    0.1120
Pt    0.0164    0.7965    0.0734
Pt    0.0174    0.7970    0.1114
Pt    0.0184    0.8353    0.0394
Pt    0.1323    0.9806    0.0399
Pt    0.0180    0.8696    0.0400
Pt    0.0215    0.8705    0.0787
Pt    0.0933    0.9087    0.0734
Pt    0.0201    0.9068    0.0396
Pt    0.0194    0.9080    0.0772
Pt    0.0187    0.9074    0.1142
Pt    0.0950    0.9070    0.0373
Pt    0.0188    0.9433    0.0391
Pt    0.0192    0.9453    0.0752
Pt    0.0191    0.9454    0.1141
Pt    0.1328    0.9471    0.1108
Pt    0.0196    0.9829    0.0373
Pt    0.0190    0.9824    0.0767
Pt    0.0204    0.9823    0.1138
Pt    0.0550    0.7608    0.0380
Pt    0.0562    0.7599    0.0745
Pt    0.0554    0.7628    0.1101
Pt    0.0545    0.7980    0.0366
Pt    0.0556    0.7977    0.0734
Pt    0.0558    0.7985    0.1124
Pt    0.0552    0.8348    0.0403
Pt    0.0567    0.8345    0.0766
Pt    0.1302    0.9451    0.0388
Pt    0.0562    0.8698    0.0375
Pt    0.0568    0.8703    0.0769
Pt    0.1302    0.7977    0.0387
Pt    0.0579    0.9061    0.0380
Pt    0.0578    0.9079    0.0764
Pt    0.0742    0.9267    0.1132
Pt    0.1113    0.9089    0.0562
Pt    0.0563    0.9432    0.0384
Pt    0.0573    0.9438    0.0749
Pt    0.0562    0.9446    0.1140
Pt    0.1314    0.8003    0.1120
Pt    0.0572    0.9797    0.0380
Pt    0.0564    0.9827    0.0758
Pt    0.0562    0.9840    0.1135
Pt    0.1310    0.7983    0.0746
Pt    0.0925    0.7617    0.0359
Pt    0.0944    0.7607    0.0756
Pt    0.0938    0.7606    0.1116
Pt    0.0935    0.7969    0.0372
Pt    0.0944    0.7980    0.0746
Pt    0.0924    0.7986    0.1114
Pt    0.0933    0.8351    0.0389
Pt    0.0936    0.8336    0.0747
Pt    0.0571    0.9062    0.0019
Pt    0.2404    0.8710    0.0026
Pt    0.1134    0.0005    0.0384
Pt    0.0018    0.9817    0.0189
Pt    0.2230    0.9283    0.0021
Pt    0.0760    0.9254    0.0014
Pt    0.0012    0.8892    0.0774
Pt    0.0012    0.9999    0.0753
Pt    0.0371    0.8525    0.0019
Pt    0.0013    0.8704    0.0598
Pt    0.0937    0.0008    0.0950
Pt    0.0752    0.9998    0.0385
Pt    0.2400    0.7610    0.0018
Pt    0.0014    0.9635    0.0390
Pt    0.0389    0.0004    0.0380
Pt    0.0769    0.8884    0.0015
Pt    0.0582    0.8694    0.0019
Pt    0.0944    0.9995    0.0190
Pt    0.1130    0.9265    0.0023
Pt    0.0200    0.9437    0.0013
Pt    0.0379    0.8880    0.0023
Pt    0.0193    0.0004    0.0181
Pt    0.1128    0.0007    0.0022
Pt    0.0955    0.9068    0.0024
Pt    0.1326    0.9434    0.0034
Pt    0.2041    0.7966    0.0015
Pt    0.0576    0.9806    0.0015
Pt    0.0024    0.9247    0.0019
Pt    0.0946    0.9455    0.0022
Pt    0.0202    0.9056    0.0012
Pt    0.2401    0.9840    0.2232
Pt    0.0014    0.7611    0.2035
Pt    0.2413    0.9831    0.1860
Pt    0.0364    0.7821    0.1500
Pt    0.0363    0.7804    0.1867
Pt    0.0376    0.7777    0.2233
Pt    0.0739    0.7803    0.1488
Pt    0.0754    0.7817    0.1857
Pt    0.0753    0.7790    0.2245
Pt    0.1116    0.7821    0.1479
Pt    0.1111    0.7812    0.1868
Pt    0.1126    0.7810    0.2228
Pt    0.1113    0.9643    0.1483
Pt    0.1490    0.7800    0.1485
Pt    0.1492    0.7807    0.1849
Pt    0.1500    0.7808    0.2249
Pt    0.1492    0.8175    0.1487
Pt    0.1491    0.8168    0.1855
Pt    0.1503    0.8156    0.2232
Pt    0.1474    0.9279    0.1860
Pt    0.1488    0.9263    0.2235
Pt    0.1485    0.9652    0.1489
Pt    0.1486    0.9628    0.1868
Pt    0.1481    0.9638    0.2233
Pt    0.1857    0.7804    0.1487
Pt    0.1872    0.7802    0.1867
Pt    0.1882    0.7795    0.2232
Pt    0.1867    0.8166    0.1487
Pt    0.1868    0.8165    0.1859
Pt    0.1870    0.8177    0.2242
Pt    0.1865    0.8545    0.1845
Pt    0.1855    0.8524    0.2223
Pt    0.1841    0.8897    0.1847
Pt    0.1852    0.8893    0.2229
Pt    0.1853    0.9268    0.1482
Pt    0.1849    0.9268    0.1854
Pt    0.1857    0.9259    0.2226
Pt    0.1867    0.9642    0.1488
Pt    0.1861    0.9648    0.1852
Pt    0.1860    0.9641    0.2238
Pt    0.2237    0.7798    0.1500
Pt    0.2253    0.7793    0.1870
Pt    0.2225    0.8166    0.1501
Pt    0.2248    0.8166    0.1857
Pt    0.2243    0.8182    0.2221
Pt    0.2256    0.8538    0.1854
Pt    0.2227    0.8536    0.2230
Pt    0.2227    0.8907    0.1843
Pt    0.2240    0.8905    0.2240
Pt    0.2216    0.9271    0.1485
Pt    0.2219    0.9256    0.1863
Pt    0.2227    0.9270    0.2233
Pt    0.2221    0.9644    0.1480
Pt    0.2233    0.9649    0.1851
Pt    0.2231    0.9649    0.2241
Pt    0.2417    0.9827    0.1474
Pt    0.2417    0.9442    0.2241
Pt    0.2407    0.9471    0.1857
Pt    0.2406    0.9475    0.1482
Pt    0.0038    0.8721    0.2403
Pt    0.0017    0.9280    0.2224
Pt    0.2396    0.9639    0.1291
Pt    0.2424    0.0010    0.1305
Pt    0.0044    0.9080    0.2403
Pt    0.0356    0.7627    0.1321
Pt    0.0362    0.7621    0.1675
Pt    0.0366    0.7603    0.2046
Pt    0.0370    0.7599    0.2427
Pt    0.0369    0.7981    0.1294
Pt    0.0395    0.7972    0.2050
Pt    0.0382    0.7963    0.2425
Pt    0.2427    0.9081    0.2215
Pt    0.0374    0.9465    0.1308
Pt    0.0372    0.9836    0.1331
Pt    0.0743    0.7607    0.1303
Pt    0.0746    0.7620    0.1669
Pt    0.0766    0.7622    0.2054
Pt    0.0758    0.7613    0.2437
Pt    0.0739    0.7982    0.1310
Pt    0.0755    0.7991    0.1679
Pt    0.0735    0.7988    0.2057
Pt    0.0739    0.9835    0.1315
Pt    0.1114    0.7621    0.1311
Pt    0.1122    0.7623    0.1670
Pt    0.1121    0.7622    0.2045
Pt    0.1129    0.7627    0.2416
Pt    0.1112    0.8025    0.1299
Pt    0.1113    0.8012    0.1650
Pt    0.1127    0.9469    0.1295
Pt    0.1109    0.9825    0.1311
Pt    0.1119    0.9814    0.1684
Pt    0.1115    0.9804    0.2415
Pt    0.1495    0.7626    0.1305
Pt    0.1499    0.7617    0.1675
Pt    0.1502    0.7624    0.2051
Pt    0.1485    0.7618    0.2430
Pt    0.1499    0.8001    0.1291
Pt    0.1498    0.7981    0.1668
Pt    0.1495    0.7981    0.2059
Pt    0.1490    0.8347    0.1676
Pt    0.1508    0.8341    0.2052
Pt    0.1489    0.9073    0.2028
Pt    0.1486    0.9063    0.2412
Pt    0.1505    0.9466    0.1305
Pt    0.1493    0.9456    0.1665
Pt    0.1479    0.9452    0.2044
Pt    0.1479    0.9453    0.2416
Pt    0.1495    0.9847    0.1312
Pt    0.1479    0.9831    0.1680
Pt    0.1480    0.9821    0.2041
Pt    0.1470    0.9820    0.2418
Pt    0.1862    0.7608    0.1309
Pt    0.1871    0.7628    0.1686
Pt    0.1868    0.7622    0.2043
Pt    0.1879    0.7617    0.2411
Pt    0.1873    0.7993    0.1301
Pt    0.1863    0.7984    0.1686
Pt    0.1884    0.7980    0.2045
Pt    0.1882    0.7986    0.2408
Pt    0.1856    0.8353    0.1655
Pt    0.1855    0.8353    0.2048
Pt    0.1863    0.8725    0.1667
Pt    0.1831    0.8712    0.2034
Pt    0.1860    0.8709    0.2411
Pt    0.1849    0.9071    0.1659
Pt    0.1849    0.9075    0.2043
Pt    0.1841    0.9072    0.2414
Pt    0.1865    0.9463    0.1662
Pt    0.1854    0.9455    0.2057
Pt    0.1860    0.9439    0.2417
Pt    0.1852    0.9859    0.1283
Pt    0.1866    0.9831    0.1668
Pt    0.1850    0.9832    0.2040
Pt    0.1859    0.9824    0.2430
Pt    0.2241    0.7617    0.1310
Pt    0.2247    0.7615    0.1679
Pt    0.2260    0.7621    0.2048
Pt    0.2249    0.7982    0.1314
Pt    0.2252    0.7974    0.1676
Pt    0.2248    0.7982    0.2066
Pt    0.2244    0.8352    0.1684
Pt    0.2239    0.8357    0.2047
Pt    0.2225    0.8722    0.1649
Pt    0.2240    0.8730    0.2029
Pt    0.2233    0.8713    0.2426
Pt    0.2217    0.9083    0.1315
Pt    0.2218    0.9094    0.1661
Pt    0.2218    0.9088    0.2060
Pt    0.2230    0.9083    0.2416
Pt    0.2233    0.9449    0.1283
Pt    0.2219    0.9466    0.1667
Pt    0.2224    0.9452    0.2038
Pt    0.2222    0.9453    0.2420
Pt    0.2223    0.9822    0.1293
Pt    0.2245    0.9842    0.1651
Pt    0.2218    0.9836    0.2037
Pt    0.2231    0.9836    0.2420
Pt    0.0189    0.7812    0.1323
Pt    0.0197    0.7803    0.2037
Pt    0.0197    0.7789    0.2411
Pt    0.0214    0.9283    0.2416
Pt    0.0193    0.9644    0.1319
Pt    0.0552    0.7793    0.1294
Pt    0.0551    0.7809    0.1676
Pt    0.0561    0.7791    0.2056
Pt    0.0578    0.7799    0.2441
Pt    0.0559    0.9642    0.1317
Pt    0.0932    0.7805    0.1292
Pt    0.0946    0.7814    0.1680
Pt    0.0943    0.7827    0.2062
Pt    0.0913    0.9630    0.1317
Pt    0.1298    0.7813    0.1305
Pt    0.1302    0.7809    0.1662
Pt    0.1307    0.7789    0.2033
Pt    0.1311    0.7801    0.2402
Pt    0.1315    0.8172    0.1671
Pt    0.1330    0.8172    0.2041
Pt    0.1324    0.9314    0.1298
Pt    0.1303    0.9251    0.2055
Pt    0.1297    0.9260    0.2408
Pt    0.1307    0.9650    0.1312
Pt    0.1306    0.9631    0.1689
Pt    0.1296    0.9641    0.2037
Pt    0.1285    0.9627    0.2415
Pt    0.1679    0.7802    0.1300
Pt    0.1675    0.7804    0.1673
Pt    0.1692    0.7805    0.2058
Pt    0.1700    0.7795    0.2438
Pt    0.1687    0.8179    0.1296
Pt    0.1676    0.8172    0.1680
Pt    0.1686    0.8149    0.2051
Pt    0.1678    0.8526    0.1651
Pt    0.1659    0.8536    0.2051
Pt    0.1652    0.8886    0.2050
Pt    0.1662    0.8883    0.2424
Pt    0.1677    0.9272    0.1670
Pt    0.1657    0.9270    0.2045
Pt    0.1668    0.9260    0.2422
Pt    0.1703    0.9656    0.1288
Pt    0.1677    0.9640    0.1662
Pt    0.1671    0.9632    0.2041
Pt    0.1670    0.9649    0.2420
Pt    0.2057    0.7801    0.1300
Pt    0.2057    0.7807    0.1691
Pt    0.2071    0.7799    0.2045
Pt    0.2067    0.8147    0.1301
Pt    0.2042    0.8157    0.1680
Pt    0.2057    0.8174    0.2042
Pt    0.2063    0.8181    0.2401
Pt    0.2057    0.8528    0.1657
Pt    0.2035    0.8542    0.2044
Pt    0.2056    0.8536    0.2421
Pt    0.2045    0.8894    0.1668
Pt    0.2043    0.8893    0.2032
Pt    0.2040    0.8904    0.2430
Pt    0.2039    0.9267    0.1312
Pt    0.2029    0.9264    0.1669
Pt    0.2034    0.9271    0.2042
Pt    0.2039    0.9255    0.2423
Pt    0.2031    0.9652    0.1288
Pt    0.2050    0.9642    0.1666
Pt    0.2035    0.9652    0.2051
Pt    0.2041    0.9643    0.2420
Pt    0.2443    0.7797    0.1319
Pt    0.2428    0.7789    0.1669
Pt    0.2410    0.8182    0.2026
Pt    0.2422    0.8535    0.2038
Pt    0.2413    0.8894    0.1669
Pt    0.2418    0.8899    0.2023
Pt    0.2429    0.8893    0.2413
Pt    0.2401    0.9264    0.1294
Pt    0.2409    0.9279    0.1666
Pt    0.2403    0.9278    0.2040
Pt    0.2428    0.9254    0.2410
Pt    0.1659    0.0006    0.2042
Pt    0.2420    0.9649    0.1665
Pt    0.2408    0.9646    0.2052
Pt    0.2415    0.9635    0.2422
Pt    0.0165    0.7633    0.1500
Pt    0.0181    0.7626    0.1853
Pt    0.0190    0.7596    0.2243
Pt    0.0205    0.7978    0.2224
Pt    0.0547    0.7619    0.1488
Pt    0.0553    0.7633    0.1854
Pt    0.0573    0.7616    0.2246
Pt    0.0559    0.7981    0.1497
Pt    0.0561    0.7962    0.2236
Pt    0.0928    0.7627    0.1491
Pt    0.0932    0.7624    0.1865
Pt    0.0940    0.7623    0.2249
Pt    0.0938    0.7994    0.1476
Pt    0.0927    0.8009    0.1879
Pt    0.0935    0.9833    0.1494
Pt    0.1305    0.7614    0.1483
Pt    0.1309    0.7625    0.1847
Pt    0.1297    0.7628    0.2231
Pt    0.1309    0.8006    0.1472
Pt    0.1285    0.7986    0.1868
Pt    0.1296    0.7993    0.2208
Pt    0.1320    0.9076    0.2225
Pt    0.1292    0.9463    0.1503
Pt    0.1300    0.9450    0.2219
Pt    0.1298    0.9829    0.1492
Pt    0.1294    0.9832    0.1867
Pt    0.1294    0.9821    0.2233
Pt    0.1691    0.7612    0.1491
Pt    0.1692    0.7616    0.1857
Pt    0.1682    0.7626    0.2242
Pt    0.1676    0.7987    0.1475
Pt    0.1684    0.7981    0.1862
Pt    0.1685    0.7978    0.2248
Pt    0.1675    0.8344    0.1490
Pt    0.1685    0.8356    0.1854
Pt    0.1682    0.8344    0.2229
Pt    0.1663    0.8711    0.1844
Pt    0.1658    0.8709    0.2241
Pt    0.1675    0.9086    0.1851
Pt    0.1664    0.9069    0.2232
Pt    0.1678    0.9467    0.1483
Pt    0.1675    0.9456    0.1858
Pt    0.1680    0.9452    0.2247
Pt    0.1685    0.9840    0.1485
Pt    0.1681    0.9829    0.1850
Pt    0.1659    0.9812    0.2216
Pt    0.2052    0.7613    0.1493
Pt    0.2062    0.7615    0.1861
Pt    0.2078    0.7621    0.2229
Pt    0.2048    0.7982    0.1501
Pt    0.2078    0.7996    0.1875
Pt    0.2064    0.7984    0.2242
Pt    0.2059    0.8341    0.1495
Pt    0.2053    0.8359    0.1863
Pt    0.2052    0.8361    0.2227
Pt    0.2055    0.8717    0.1854
Pt    0.2035    0.8719    0.2228
Pt    0.2030    0.9069    0.1475
Pt    0.2033    0.9076    0.1851
Pt    0.2035    0.9079    0.2235
Pt    0.2041    0.9467    0.1470
Pt    0.2042    0.9460    0.1851
Pt    0.2052    0.9461    0.2230
Pt    0.2047    0.9838    0.1479
Pt    0.2054    0.9832    0.1842
Pt    0.2040    0.9834    0.2231
Pt    0.2432    0.7600    0.1496
Pt    0.2445    0.7614    0.1871
Pt    0.2419    0.7977    0.1861
Pt    0.2422    0.8712    0.1836
Pt    0.2413    0.8704    0.2228
Pt    0.2410    0.9088    0.1469
Pt    0.2408    0.9092    0.1855
Pt    0.1841    0.0006    0.2232
Pt    0.1279    0.0008    0.2430
Pt    0.1671    0.0007    0.2423
Pt    0.1126    0.0004    0.2229
Pt    0.1465    0.0010    0.2233
Pt    0.0027    0.7783    0.3716
Pt    0.0031    0.8898    0.2582
Pt    0.0028    0.7949    0.3173
Pt    0.0017    0.9463    0.3145
Pt    0.0038    0.8535    0.2968
Pt    0.0035    0.9268    0.3724
Pt    0.0018    0.8361    0.3152
Pt    0.0022    0.9098    0.3144
Pt    0.2409    0.9829    0.2990
Pt    0.0021    0.8912    0.2956
Pt    0.1847    0.0007    0.3366
Pt    0.0045    0.8529    0.3717
Pt    0.0032    0.8345    0.3534
Pt    0.0020    0.8915    0.3336
Pt    0.0025    0.8531    0.3353
Pt    0.0034    0.8520    0.2577
Pt    0.2409    0.9836    0.2612
Pt    0.0031    0.9088    0.2760
Pt    0.0022    0.9269    0.3352
Pt    0.0034    0.9275    0.2589
Pt    0.2409    0.9832    0.3368
Pt    0.0031    0.7578    0.3178
Pt    0.1858    0.9993    0.3756
Pt    0.0033    0.9650    0.3716
Pt    0.0385    0.7784    0.2625
Pt    0.0398    0.7800    0.2971
Pt    0.0394    0.7760    0.3716
Pt    0.0398    0.8158    0.2971
Pt    0.0419    0.8144    0.3349
Pt    0.0396    0.8144    0.3706
Pt    0.0385    0.8541    0.2959
Pt    0.0419    0.8532    0.3349
Pt    0.0406    0.8528    0.3704
Pt    0.0406    0.8896    0.2967
Pt    0.0400    0.8908    0.3344
Pt    0.0408    0.8894    0.3725
Pt    0.0400    0.9274    0.2600
Pt    0.0392    0.9271    0.2955
Pt    0.0407    0.9268    0.3329
Pt    0.0423    0.9271    0.3719
Pt    0.0389    0.9655    0.2944
Pt    0.0399    0.9651    0.3337
Pt    0.0408    0.9651    0.3700
Pt    0.0766    0.8892    0.2956
Pt    0.0762    0.8896    0.3359
Pt    0.0771    0.9270    0.2967
Pt    0.0769    0.9260    0.3343
Pt    0.0765    0.9634    0.2615
Pt    0.0770    0.9635    0.2965
Pt    0.0774    0.9642    0.3345
Pt    0.1135    0.9250    0.2976
Pt    0.1112    0.9266    0.3335
Pt    0.1120    0.9631    0.2616
Pt    0.1125    0.9647    0.2969
Pt    0.1136    0.9623    0.3346
Pt    0.0041    0.9667    0.3335
Pt    0.1478    0.8890    0.2619
Pt    0.1478    0.9259    0.2594
Pt    0.1484    0.9261    0.2976
Pt    0.1490    0.9251    0.3357
Pt    0.1470    0.9640    0.2596
Pt    0.1486    0.9621    0.2978
Pt    0.1472    0.9631    0.3362
Pt    0.1875    0.7789    0.3712
Pt    0.1856    0.8887    0.2597
Pt    0.1853    0.8875    0.2981
Pt    0.1861    0.8902    0.3700
Pt    0.1848    0.9261    0.2600
Pt    0.1868    0.9260    0.2977
Pt    0.1848    0.9268    0.3352
Pt    0.1859    0.9621    0.2608
Pt    0.1863    0.9634    0.2984
Pt    0.1844    0.9620    0.3363
Pt    0.1847    0.9642    0.3721
Pt    0.2234    0.7809    0.3698
Pt    0.2233    0.8164    0.3717
Pt    0.2254    0.8546    0.3356
Pt    0.2236    0.8535    0.3712
Pt    0.2235    0.8894    0.2601
Pt    0.2235    0.8888    0.2973
Pt    0.2226    0.8882    0.3345
Pt    0.2208    0.8901    0.3720
Pt    0.2244    0.9263    0.2602
Pt    0.2240    0.9265    0.2977
Pt    0.2230    0.9257    0.3350
Pt    0.2225    0.9267    0.3722
Pt    0.2231    0.9638    0.2608
Pt    0.2237    0.9636    0.2977
Pt    0.2227    0.9640    0.3375
Pt    0.2231    0.9636    0.3733
Pt    0.2419    0.9465    0.3729
Pt    0.0016    0.7990    0.2792
Pt    0.0040    0.7766    0.3353
Pt    0.2419    0.9829    0.3728
Pt    0.0038    0.9845    0.3525
Pt    0.0034    0.9654    0.2580
Pt    0.0030    0.9838    0.2762
Pt    0.0013    0.9477    0.2766
Pt    0.0032    0.8719    0.3144
Pt    0.0029    0.8159    0.3345
Pt    0.2421    0.9447    0.3355
Pt    0.0019    0.8720    0.3527
Pt    0.0023    0.7804    0.2605
Pt    0.0035    0.8893    0.3726
Pt    0.0051    0.9084    0.3539
Pt    0.0038    0.9459    0.3523
Pt    0.2420    0.9447    0.2980
Pt    0.0032    0.8163    0.2985
Pt    0.0024    0.9832    0.3148
Pt    0.2231    0.0007    0.3716
Pt    0.0021    0.9662    0.2957
Pt    0.0380    0.7614    0.2802
Pt    0.0390    0.7976    0.2791
Pt    0.0402    0.7988    0.3164
Pt    0.0401    0.7954    0.3529
Pt    0.0398    0.8355    0.3146
Pt    0.0407    0.8322    0.3519
Pt    0.0390    0.8719    0.2764
Pt    0.0408    0.8708    0.3165
Pt    0.0419    0.8716    0.3526
Pt    0.0400    0.9079    0.2779
Pt    0.0384    0.9092    0.3145
Pt    0.0409    0.9092    0.3526
Pt    0.0377    0.9464    0.2767
Pt    0.0402    0.9458    0.3131
Pt    0.0404    0.9469    0.3518
Pt    0.0377    0.9845    0.3134
Pt    0.0411    0.9831    0.3524
Pt    0.0773    0.9067    0.2790
Pt    0.0778    0.9062    0.3154
Pt    0.0783    0.9094    0.3527
Pt    0.0793    0.9439    0.2772
Pt    0.0772    0.9456    0.3168
Pt    0.0772    0.9453    0.3518
Pt    0.0764    0.9821    0.2788
Pt    0.0745    0.9817    0.3157
Pt    0.1308    0.9064    0.2980
Pt    0.1120    0.9430    0.2784
Pt    0.1135    0.9447    0.3162
Pt    0.1096    0.9850    0.2801
Pt    0.1123    0.9825    0.3175
Pt    0.1494    0.8897    0.2977
Pt    0.1481    0.9082    0.2788
Pt    0.1494    0.9075    0.3154
Pt    0.1478    0.9443    0.2781
Pt    0.1495    0.9431    0.3167
Pt    0.1483    0.9833    0.2802
Pt    0.1485    0.9824    0.3166
Pt    0.1482    0.9829    0.3540
Pt    0.1861    0.8708    0.2796
Pt    0.1863    0.9052    0.2790
Pt    0.1860    0.9076    0.3168
Pt    0.1862    0.9088    0.3540
Pt    0.1864    0.9452    0.2803
Pt    0.1853    0.9460    0.3168
Pt    0.1839    0.9454    0.3561
Pt    0.1858    0.9819    0.2805
Pt    0.1864    0.9833    0.3173
Pt    0.1839    0.9836    0.3550
Pt    0.2247    0.8358    0.3537
Pt    0.2253    0.8702    0.2783
Pt    0.2244    0.8701    0.3159
Pt    0.2235    0.8724    0.3532
Pt    0.2239    0.9069    0.2793
Pt    0.2236    0.9062    0.3157
Pt    0.2217    0.9083    0.3533
Pt    0.2228    0.9451    0.2792
Pt    0.2237    0.9451    0.3177
Pt    0.2240    0.9445    0.3545
Pt    0.2232    0.9837    0.2781
Pt    0.2233    0.9822    0.3186
Pt    0.2232    0.9825    0.3544
Pt    0.0195    0.7794    0.2800
Pt    0.0224    0.7796    0.3153
Pt    0.0233    0.7776    0.3520
Pt    0.0212    0.8160    0.2798
Pt    0.0219    0.8170    0.3169
Pt    0.0215    0.8146    0.3523
Pt    0.0210    0.8523    0.2765
Pt    0.0211    0.8533    0.3168
Pt    0.0230    0.8532    0.3523
Pt    0.0216    0.8910    0.2770
Pt    0.0216    0.8909    0.3167
Pt    0.0222    0.8902    0.3537
Pt    0.0210    0.9271    0.2765
Pt    0.0212    0.9279    0.3157
Pt    0.0233    0.9280    0.3530
Pt    0.0212    0.9655    0.2765
Pt    0.0217    0.9650    0.3140
Pt    0.0219    0.9658    0.3515
Pt    0.0595    0.8514    0.3531
Pt    0.0570    0.8893    0.2778
Pt    0.0584    0.8897    0.3146
Pt    0.0603    0.8910    0.3542
Pt    0.0597    0.9272    0.2771
Pt    0.0594    0.9267    0.3145
Pt    0.0586    0.9272    0.3523
Pt    0.0583    0.9653    0.2773
Pt    0.0574    0.9639    0.3163
Pt    0.0590    0.9652    0.3519
Pt    0.0952    0.9240    0.2785
Pt    0.0942    0.9251    0.3152
Pt    0.0950    0.9644    0.2789
Pt    0.0963    0.9629    0.3160
Pt    0.1301    0.9257    0.2793
Pt    0.1295    0.9229    0.3173
Pt    0.1314    0.9633    0.2794
Pt    0.1311    0.9631    0.3161
Pt    0.1664    0.8880    0.2779
Pt    0.1664    0.9267    0.2788
Pt    0.1675    0.9263    0.3155
Pt    0.1667    0.9639    0.2790
Pt    0.1669    0.9637    0.3173
Pt    0.1663    0.9638    0.3545
Pt    0.2067    0.8531    0.3531
Pt    0.2051    0.8884    0.2792
Pt    0.2030    0.8877    0.3173
Pt    0.2039    0.8893    0.3519
Pt    0.2042    0.9261    0.2791
Pt    0.2041    0.9273    0.3167
Pt    0.2036    0.9273    0.3529
Pt    0.2044    0.9642    0.2787
Pt    0.2044    0.9643    0.3173
Pt    0.2033    0.9641    0.3547
Pt    0.2436    0.8544    0.3531
Pt    0.2438    0.8883    0.2802
Pt    0.2428    0.8889    0.3170
Pt    0.2415    0.8912    0.3541
Pt    0.2434    0.9259    0.2789
Pt    0.2424    0.9255    0.3165
Pt    0.2406    0.9265    0.3534
Pt    0.2423    0.9636    0.2788
Pt    0.2416    0.9628    0.3181
Pt    0.2424    0.9641    0.3548
Pt    0.0187    0.7605    0.2607
Pt    0.0200    0.7603    0.2983
Pt    0.0207    0.7591    0.3706
Pt    0.0204    0.7983    0.2611
Pt    0.0207    0.7977    0.2976
Pt    0.0229    0.7961    0.3344
Pt    0.0216    0.7955    0.3712
Pt    0.0216    0.8357    0.2981
Pt    0.0225    0.8350    0.3341
Pt    0.0232    0.8354    0.3712
Pt    0.0210    0.8709    0.2592
Pt    0.0219    0.8722    0.2967
Pt    0.0200    0.8721    0.3346
Pt    0.0227    0.8711    0.3715
Pt    0.0215    0.9082    0.2581
Pt    0.0216    0.9090    0.2961
Pt    0.0217    0.9095    0.3344
Pt    0.0237    0.9081    0.3722
Pt    0.0205    0.9464    0.2583
Pt    0.0206    0.9459    0.2948
Pt    0.0214    0.9466    0.3337
Pt    0.0235    0.9466    0.3713
Pt    0.0212    0.9841    0.2936
Pt    0.0224    0.9838    0.3327
Pt    0.0208    0.9843    0.3701
Pt    0.0562    0.7604    0.2626
Pt    0.0577    0.7961    0.3709
Pt    0.0585    0.8347    0.3329
Pt    0.0580    0.8316    0.3711
Pt    0.0576    0.8701    0.2976
Pt    0.0593    0.8727    0.3347
Pt    0.0603    0.8715    0.3709
Pt    0.0589    0.9078    0.2965
Pt    0.0589    0.9072    0.3332
Pt    0.0610    0.9097    0.3726
Pt    0.0569    0.9475    0.2608
Pt    0.0581    0.9461    0.2931
Pt    0.0586    0.9449    0.3338
Pt    0.0588    0.9474    0.3697
Pt    0.0576    0.9821    0.2974
Pt    0.0569    0.9833    0.3328
Pt    0.0955    0.9063    0.2962
Pt    0.0957    0.9079    0.3337
Pt    0.0949    0.9449    0.2978
Pt    0.0953    0.9445    0.3361
Pt    0.0934    0.9836    0.2992
Pt    0.1308    0.7613    0.2612
Pt    0.1292    0.9076    0.2621
Pt    0.1289    0.9438    0.2595
Pt    0.1298    0.9446    0.2980
Pt    0.1305    0.9438    0.3342
Pt    0.1282    0.9830    0.2617
Pt    0.1300    0.9828    0.2984
Pt    0.1308    0.9823    0.3359
Pt    0.1689    0.7619    0.2607
Pt    0.1664    0.9077    0.2609
Pt    0.1676    0.9071    0.2970
Pt    0.1669    0.9442    0.2598
Pt    0.1674    0.9442    0.2971
Pt    0.1657    0.9445    0.3361
Pt    0.1671    0.9820    0.2617
Pt    0.1680    0.9815    0.2987
Pt    0.1661    0.9812    0.3355
Pt    0.1663    0.9817    0.3737
Pt    0.2062    0.7616    0.3685
Pt    0.2046    0.7985    0.3721
Pt    0.2042    0.8693    0.2613
Pt    0.2053    0.8710    0.2975
Pt    0.2030    0.8707    0.3711
Pt    0.2046    0.9076    0.2614
Pt    0.2058    0.9078    0.2990
Pt    0.2044    0.9070    0.3341
Pt    0.2030    0.9096    0.3721
Pt    0.2047    0.9442    0.2610
Pt    0.2058    0.9451    0.2989
Pt    0.2036    0.9456    0.3354
Pt    0.2035    0.9449    0.3722
Pt    0.2038    0.9834    0.2605
Pt    0.2053    0.9816    0.2987
Pt    0.2035    0.9816    0.3372
Pt    0.0033    0.8712    0.2772
Pt    0.2424    0.7622    0.3693
Pt    0.2421    0.7976    0.3700
Pt    0.2427    0.8346    0.3712
Pt    0.2439    0.8709    0.2598
Pt    0.2429    0.8715    0.2977
Pt    0.2459    0.8692    0.3320
Pt    0.2413    0.8730    0.3718
Pt    0.2434    0.9068    0.2604
Pt    0.2425    0.9067    0.2987
Pt    0.2407    0.9083    0.3352
Pt    0.2416    0.9086    0.3731
Pt    0.2416    0.9437    0.2594
Pt    0.0021    0.9287    0.2947
Pt    0.0039    0.8329    0.2782
Pt    0.0038    0.7958    0.3515
Pt    0.0029    0.7586    0.3531
Pt    0.2418    0.0010    0.3178
Pt    0.2215    0.0007    0.2980
Pt    0.2049    0.9804    0.3733
Pt    0.0013    0.7786    0.2982
Pt    0.0025    0.8151    0.3708
Pt    0.0025    0.8167    0.2592
Pt    0.1850    0.0009    0.2996
Pt    0.1661    0.0004    0.2793
Pt    0.0020    0.0006    0.2963
Pt    0.2037    0.0009    0.3548
Pt    0.0560    0.9999    0.5009
Pt    0.0029    0.8154    0.4460
Pt    0.0027    0.8140    0.4830
Pt    0.0030    0.9274    0.4840
Pt    0.0029    0.9656    0.4087
Pt    0.0041    0.7784    0.4840
Pt    0.2060    0.9995    0.3914
Pt    0.0045    0.7594    0.4264
Pt    0.0051    0.7774    0.4460
Pt    0.0035    0.8912    0.4852
Pt    0.0030    0.9089    0.4645
Pt    0.0029    0.9456    0.4638
Pt    0.0048    0.9272    0.4078
Pt    0.0043    0.8535    0.4837
Pt    0.0047    0.9857    0.3897
Pt    0.1489    0.0010    0.4816
Pt    0.0028    0.8533    0.4465
Pt    0.0032    0.7582    0.3903
Pt    0.0400    0.7782    0.4086
Pt    0.0408    0.7769    0.4464
Pt    0.0396    0.8148    0.4075
Pt    0.0399    0.8148    0.4457
Pt    0.0392    0.8148    0.4837
Pt    0.0403    0.8516    0.4089
Pt    0.0413    0.8535    0.4459
Pt    0.0405    0.8525    0.4830
Pt    0.0414    0.8896    0.4081
Pt    0.0418    0.8904    0.4463
Pt    0.0399    0.9279    0.4085
Pt    0.0411    0.9280    0.4467
Pt    0.0385    0.9641    0.4461
Pt    0.0398    0.9653    0.4799
Pt    0.0780    0.7782    0.4073
Pt    0.0784    0.7765    0.4437
Pt    0.0773    0.7800    0.4821
Pt    0.0767    0.8145    0.4079
Pt    0.0773    0.8158    0.4452
Pt    0.0760    0.8154    0.4823
Pt    0.0760    0.8515    0.4086
Pt    0.0765    0.8548    0.4444
Pt    0.1321    0.7979    0.4083
Pt    0.1124    0.7753    0.4445
Pt    0.1116    0.7793    0.4813
Pt    0.1132    0.8164    0.4454
Pt    0.1118    0.8175    0.4814
Pt    0.1488    0.7803    0.4072
Pt    0.1485    0.7798    0.4445
Pt    0.1481    0.7788    0.4834
Pt    0.1488    0.8165    0.4076
Pt    0.1497    0.8176    0.4448
Pt    0.1488    0.8178    0.4815
Pt    0.1488    0.8533    0.4812
Pt    0.1862    0.7808    0.4063
Pt    0.1871    0.7801    0.4442
Pt    0.1854    0.7802    0.4822
Pt    0.1858    0.8164    0.4080
Pt    0.1865    0.8155    0.4452
Pt    0.1862    0.8163    0.4815
Pt    0.1879    0.8549    0.4075
Pt    0.1856    0.8544    0.4461
Pt    0.1846    0.8545    0.4823
Pt    0.2244    0.7791    0.4071
Pt    0.2234    0.7805    0.4446
Pt    0.2235    0.7795    0.4829
Pt    0.2224    0.8169    0.4083
Pt    0.2231    0.8171    0.4446
Pt    0.2240    0.8180    0.4825
Pt    0.2221    0.8552    0.4086
Pt    0.2241    0.8557    0.4443
Pt    0.2227    0.8558    0.4821
Pt    0.2230    0.8912    0.4095
Pt    0.2241    0.8907    0.4819
Pt    0.0030    0.7961    0.4641
Pt    0.0037    0.8360    0.4281
Pt    0.1492    0.7971    0.3886
Pt    0.0027    0.8348    0.3886
Pt    0.0037    0.8896    0.4077
Pt    0.0030    0.7768    0.4084
Pt    0.0036    0.9856    0.4269
Pt    0.0041    0.9644    0.4436
Pt    0.0029    0.7966    0.4269
Pt    0.0023    0.8529    0.4085
Pt    0.0041    0.8348    0.4654
Pt    0.0035    0.8718    0.4645
Pt    0.0039    0.9083    0.3896
Pt    0.0033    0.8715    0.3904
Pt    0.0035    0.9090    0.4278
Pt    0.0043    0.9470    0.3897
Pt    0.2026    0.8538    0.4999
Pt    0.0027    0.7974    0.3908
Pt    0.0032    0.8716    0.4272
Pt    0.0029    0.9462    0.4258
Pt    0.2418    0.9992    0.3911
Pt    0.0398    0.7592    0.4277
Pt    0.0393    0.7968    0.3900
Pt    0.0395    0.7965    0.4268
Pt    0.0403    0.7963    0.4642
Pt    0.0406    0.8341    0.3891
Pt    0.0392    0.8339    0.4282
Pt    0.0405    0.8336    0.4647
Pt    0.0410    0.8717    0.3891
Pt    0.0407    0.8723    0.4273
Pt    0.0406    0.8717    0.4655
Pt    0.0409    0.9096    0.3901
Pt    0.0407    0.9091    0.4276
Pt    0.0404    0.9467    0.3881
Pt    0.0395    0.9447    0.4282
Pt    0.0402    0.9468    0.4630
Pt    0.0386    0.9845    0.4636
Pt    0.0780    0.7604    0.4650
Pt    0.0755    0.7958    0.3890
Pt    0.0778    0.7955    0.4264
Pt    0.0762    0.7967    0.4631
Pt    0.0763    0.8328    0.3898
Pt    0.0757    0.8342    0.4270
Pt    0.0770    0.8356    0.4647
Pt    0.1106    0.7579    0.4633
Pt    0.1139    0.7987    0.4263
Pt    0.1120    0.7971    0.4625
Pt    0.1118    0.8348    0.4269
Pt    0.1122    0.8350    0.4618
Pt    0.1489    0.7624    0.3901
Pt    0.1499    0.7607    0.4256
Pt    0.1483    0.7615    0.4632
Pt    0.1501    0.7969    0.4266
Pt    0.1490    0.7977    0.4635
Pt    0.1517    0.8336    0.4262
Pt    0.1480    0.8365    0.4617
Pt    0.1863    0.7609    0.3881
Pt    0.1868    0.7596    0.4266
Pt    0.1861    0.7610    0.4651
Pt    0.1840    0.7986    0.3878
Pt    0.1862    0.7970    0.4255
Pt    0.1859    0.7990    0.4633
Pt    0.1865    0.8367    0.4253
Pt    0.1857    0.8361    0.4654
Pt    0.1858    0.8733    0.3898
Pt    0.1851    0.8728    0.4650
Pt    0.2242    0.7613    0.3870
Pt    0.2245    0.7610    0.4260
Pt    0.2236    0.7608    0.4632
Pt    0.2239    0.7977    0.3899
Pt    0.2223    0.7976    0.4244
Pt    0.2235    0.8000    0.4637
Pt    0.2225    0.8352    0.3901
Pt    0.2226    0.8359    0.4272
Pt    0.2232    0.8368    0.4641
Pt    0.2205    0.8730    0.3906
Pt    0.2231    0.8736    0.4271
Pt    0.2226    0.8754    0.4633
Pt    0.2217    0.9081    0.3905
Pt    0.2237    0.9819    0.3911
Pt    0.0213    0.7765    0.3893
Pt    0.0227    0.7770    0.4285
Pt    0.0227    0.7794    0.4653
Pt    0.0206    0.8165    0.3893
Pt    0.0220    0.8159    0.4268
Pt    0.0215    0.8146    0.4663
Pt    0.0219    0.8540    0.3911
Pt    0.0229    0.8528    0.4284
Pt    0.0227    0.8531    0.4648
Pt    0.0228    0.8902    0.3909
Pt    0.0219    0.8901    0.4280
Pt    0.0221    0.8903    0.4645
Pt    0.0225    0.9276    0.3891
Pt    0.0217    0.9276    0.4276
Pt    0.0214    0.9287    0.4646
Pt    0.0242    0.9661    0.3899
Pt    0.0232    0.9646    0.4254
Pt    0.0202    0.9646    0.4637
Pt    0.0581    0.7793    0.3896
Pt    0.0592    0.7756    0.4251
Pt    0.0589    0.7778    0.4651
Pt    0.0576    0.8148    0.3895
Pt    0.0593    0.8154    0.4263
Pt    0.0582    0.8155    0.4640
Pt    0.0591    0.8536    0.3897
Pt    0.0583    0.8544    0.4271
Pt    0.0596    0.8535    0.4636
Pt    0.0601    0.8906    0.3903
Pt    0.0973    0.7765    0.4250
Pt    0.0954    0.7780    0.4636
Pt    0.0946    0.8164    0.4267
Pt    0.0945    0.8171    0.4634
Pt    0.1301    0.7785    0.4255
Pt    0.1296    0.7788    0.4639
Pt    0.1314    0.8172    0.4254
Pt    0.1313    0.8167    0.4636
Pt    0.1684    0.7791    0.3880
Pt    0.1682    0.7787    0.4272
Pt    0.1665    0.7781    0.4646
Pt    0.1685    0.8156    0.4260
Pt    0.1678    0.8174    0.4637
Pt    0.1668    0.8548    0.4638
Pt    0.2047    0.7792    0.3887
Pt    0.2045    0.7788    0.4251
Pt    0.2061    0.7794    0.4647
Pt    0.2048    0.8168    0.3907
Pt    0.2039    0.8163    0.4260
Pt    0.2056    0.8175    0.4642
Pt    0.2038    0.8515    0.3873
Pt    0.2038    0.8553    0.4266
Pt    0.2051    0.8553    0.4623
Pt    0.2032    0.8914    0.3908
Pt    0.2437    0.7804    0.3885
Pt    0.2423    0.7790    0.4267
Pt    0.2409    0.7809    0.4641
Pt    0.2435    0.8165    0.3891
Pt    0.2416    0.8170    0.4268
Pt    0.2406    0.8183    0.4636
Pt    0.2408    0.8541    0.3893
Pt    0.2409    0.8538    0.4264
Pt    0.2427    0.8542    0.4633
Pt    0.2430    0.8894    0.3906
Pt    0.2419    0.8919    0.4275
Pt    0.2430    0.8917    0.4645
Pt    0.2419    0.9280    0.3894
Pt    0.2426    0.9647    0.3912
Pt    0.0219    0.7580    0.4086
Pt    0.0226    0.7570    0.4455
Pt    0.0208    0.7967    0.4087
Pt    0.0214    0.7971    0.4459
Pt    0.0223    0.7969    0.4848
Pt    0.0206    0.8335    0.4084
Pt    0.0219    0.8330    0.4462
Pt    0.0211    0.8341    0.4839
Pt    0.0229    0.8719    0.4095
Pt    0.0225    0.8715    0.4464
Pt    0.0219    0.8716    0.4845
Pt    0.0228    0.9089    0.4095
Pt    0.0226    0.9086    0.4462
Pt    0.0213    0.9094    0.4813
Pt    0.0229    0.9471    0.4076
Pt    0.0209    0.9461    0.4452
Pt    0.0222    0.9448    0.4834
Pt    0.0209    0.9843    0.4080
Pt    0.0204    0.9840    0.4455
Pt    0.0201    0.9827    0.4824
Pt    0.0594    0.7611    0.4456
Pt    0.0586    0.7962    0.4077
Pt    0.0584    0.7949    0.4441
Pt    0.0588    0.7973    0.4819
Pt    0.0578    0.8338    0.4080
Pt    0.0585    0.8346    0.4451
Pt    0.0575    0.8325    0.4831
Pt    0.0599    0.8712    0.4086
Pt    0.0579    0.8723    0.4465
Pt    0.0568    0.9085    0.4089
Pt    0.0966    0.7971    0.4086
Pt    0.0949    0.7960    0.4444
Pt    0.0940    0.7981    0.4813
Pt    0.0949    0.8344    0.4081
Pt    0.0936    0.8365    0.4451
Pt    0.1322    0.7593    0.4074
Pt    0.1310    0.7598    0.4436
Pt    0.1299    0.7607    0.4815
Pt    0.1313    0.7981    0.4447
Pt    0.1308    0.7973    0.4830
Pt    0.1317    0.8359    0.4432
Pt    0.1305    0.8351    0.4810
Pt    0.1679    0.7621    0.4066
Pt    0.1680    0.7601    0.4460
Pt    0.1673    0.7607    0.4836
Pt    0.1670    0.7978    0.4060
Pt    0.1675    0.7975    0.4461
Pt    0.1665    0.7983    0.4825
Pt    0.1693    0.8363    0.4453
Pt    0.1662    0.8352    0.4822
Pt    0.1670    0.8724    0.4828
Pt    0.2049    0.7613    0.4071
Pt    0.2048    0.7617    0.4450
Pt    0.2059    0.7614    0.4834
Pt    0.2034    0.7981    0.4077
Pt    0.2052    0.7987    0.4447
Pt    0.2055    0.7989    0.4830
Pt    0.2043    0.8357    0.4087
Pt    0.2053    0.8356    0.4452
Pt    0.2050    0.8362    0.4815
Pt    0.2023    0.8744    0.4093
Pt    0.2030    0.8737    0.4442
Pt    0.2034    0.8741    0.4813
Pt    0.2425    0.7620    0.4069
Pt    0.2418    0.7610    0.4455
Pt    0.2422    0.7611    0.4831
Pt    0.2427    0.7987    0.4085
Pt    0.2414    0.7990    0.4443
Pt    0.2429    0.7998    0.4825
Pt    0.2408    0.8356    0.4083
Pt    0.2420    0.8368    0.4457
Pt    0.2426    0.8363    0.4830
Pt    0.2414    0.8723    0.4083
Pt    0.2412    0.8736    0.4450
Pt    0.2418    0.8731    0.4820
Pt    0.2415    0.9104    0.4091
Pt    0.1314    0.9992    0.5006
Pt    0.0033    0.9268    0.4456
Pt    0.1863    0.7604    0.5007
Pt    0.2055    0.9990    0.4999
Pt    0.0014    0.9816    0.4999
Pt    0.0033    0.8165    0.4101
Pt    0.0018    0.9827    0.4638
Pt    0.1110    0.7976    0.5003
Pt    0.2407    0.8543    0.5009
Pt    0.0035    0.8903    0.4458
Pt    0.0375    0.9807    0.5007
Pt    0.2429    0.7806    0.5010
Pt    0.0045    0.7602    0.4655
Pt    0.2231    0.8727    0.5004
Pt    0.2055    0.8163    0.5006
Pt    0.1859    0.7985    0.5009
Pt    0.1278    0.8171    0.5007
Pt    0.1668    0.7800    0.5011
Pt    0.2051    0.7805    0.5008
Pt    0.2404    0.8919    0.5011
Pt    0.1655    0.8527    0.5008
Pt    0.1842    0.8343    0.4997
Pt    0.0199    0.9634    0.5008
Pt    0.0376    0.9975    0.5577
Pt    0.0034    0.8333    0.5015
Pt    0.0379    0.9632    0.5195
Pt    0.0380    0.9628    0.5569
Pt    0.0743    0.9633    0.5583
Pt    0.0754    0.9607    0.5944
Pt    0.1106    0.7799    0.5194
Pt    0.1104    0.7787    0.5933
Pt    0.1113    0.9605    0.5566
Pt    0.1109    0.9605    0.5934
Pt    0.1481    0.7785    0.5202
Pt    0.1469    0.7790    0.5580
Pt    0.1479    0.7791    0.5944
Pt    0.1477    0.8168    0.5200
Pt    0.1466    0.8176    0.5580
Pt    0.1499    0.8152    0.5956
Pt    0.1483    0.8527    0.5195
Pt    0.1483    0.9253    0.5546
Pt    0.1515    0.9229    0.5943
Pt    0.1497    0.9620    0.5197
Pt    0.1487    0.9622    0.5562
Pt    0.1489    0.9621    0.5937
Pt    0.1849    0.7782    0.5192
Pt    0.1856    0.7785    0.5569
Pt    0.1863    0.7779    0.5949
Pt    0.1869    0.8168    0.5201
Pt    0.1844    0.8156    0.5569
Pt    0.1843    0.8170    0.5958
Pt    0.1863    0.8516    0.5202
Pt    0.1856    0.8525    0.5579
Pt    0.1859    0.8504    0.5949
Pt    0.1850    0.8893    0.5193
Pt    0.1848    0.8890    0.5558
Pt    0.1874    0.9254    0.5199
Pt    0.1851    0.9245    0.5567
Pt    0.1864    0.9253    0.5948
Pt    0.1877    0.9611    0.5190
Pt    0.1873    0.9617    0.5565
Pt    0.1865    0.9607    0.5953
Pt    0.2243    0.7802    0.5195
Pt    0.2243    0.7794    0.5571
Pt    0.2238    0.7777    0.5943
Pt    0.2229    0.8161    0.5199
Pt    0.2233    0.8146    0.5585
Pt    0.2240    0.8148    0.5957
Pt    0.2237    0.8516    0.5197
Pt    0.2223    0.8543    0.5588
Pt    0.2219    0.8524    0.5945
Pt    0.2238    0.8903    0.5199
Pt    0.2217    0.8882    0.5583
Pt    0.2036    0.8710    0.5956
Pt    0.2227    0.9229    0.5213
Pt    0.2253    0.9241    0.5577
Pt    0.2223    0.9242    0.5955
Pt    0.2240    0.9604    0.5565
Pt    0.2241    0.9613    0.5920
Pt    0.0021    0.7974    0.6128
Pt    0.0756    0.9992    0.5563
Pt    0.1485    0.9987    0.5201
Pt    0.0048    0.9439    0.5032
Pt    0.0384    0.0009    0.5187
Pt    0.0555    0.9991    0.5761
Pt    0.2424    0.9811    0.5938
Pt    0.0395    0.7599    0.6135
Pt    0.2252    0.0007    0.5560
Pt    0.0381    0.9824    0.5378
Pt    0.0359    0.9805    0.5780
Pt    0.0353    0.9791    0.6129
Pt    0.0761    0.7580    0.6117
Pt    0.0752    0.9799    0.5367
Pt    0.0753    0.9813    0.5758
Pt    0.0748    0.9794    0.6130
Pt    0.1122    0.7607    0.5363
Pt    0.1111    0.7585    0.5760
Pt    0.1116    0.7604    0.6136
Pt    0.0563    0.9991    0.6137
Pt    0.1119    0.7976    0.6115
Pt    0.1125    0.9421    0.6134
Pt    0.1107    0.9781    0.5356
Pt    0.1102    0.9803    0.5746
Pt    0.1125    0.9799    0.6126
Pt    0.1311    0.9985    0.5735
Pt    0.1477    0.7591    0.5393
Pt    0.1475    0.7600    0.5753
Pt    0.1491    0.7595    0.6115
Pt    0.0736    1.0000    0.5184
Pt    0.1493    0.7960    0.5388
Pt    0.1482    0.7978    0.5754
Pt    0.1484    0.7968    0.6139
Pt    0.2248    0.9991    0.5941
Pt    0.1470    0.8358    0.5388
Pt    0.1495    0.9449    0.5391
Pt    0.1486    0.9433    0.5745
Pt    0.1483    0.9414    0.6123
Pt    0.1878    0.9985    0.5177
Pt    0.1491    0.9807    0.5378
Pt    0.1508    0.9797    0.5750
Pt    0.1493    0.9802    0.6126
Pt    0.0939    0.9988    0.6124
Pt    0.1865    0.7597    0.5382
Pt    0.1839    0.7608    0.5762
Pt    0.1857    0.7586    0.6145
Pt    0.0374    0.0001    0.5954
Pt    0.1844    0.7973    0.5390
Pt    0.1843    0.7983    0.5769
Pt    0.1856    0.7960    0.6141
Pt    0.2035    0.8499    0.6127
Pt    0.1845    0.8340    0.5392
Pt    0.1856    0.8336    0.5758
Pt    0.1299    0.9975    0.5361
Pt    0.1855    0.8695    0.5384
Pt    0.1852    0.8715    0.5767
Pt    0.1851    0.9073    0.5376
Pt    0.1867    0.9079    0.5758
Pt    0.1871    0.9430    0.5386
Pt    0.1865    0.9429    0.5755
Pt    0.1858    0.9431    0.6142
Pt    0.1873    0.9815    0.5367
Pt    0.1865    0.9805    0.5752
Pt    0.1876    0.9806    0.6118
Pt    0.2423    0.0004    0.5745
Pt    0.2234    0.7615    0.5371
Pt    0.2237    0.7606    0.5744
Pt    0.2227    0.7589    0.6140
Pt    0.1112    0.9980    0.5546
Pt    0.2231    0.7986    0.5379
Pt    0.2231    0.7973    0.5754
Pt    0.2216    0.7960    0.6135
Pt    0.2249    0.9989    0.5195
Pt    0.2236    0.8347    0.5396
Pt    0.2230    0.8340    0.5759
Pt    0.2233    0.8334    0.6149
Pt    0.0180    0.0007    0.5017
Pt    0.2229    0.8711    0.5376
Pt    0.2227    0.8710    0.5774
Pt    0.2243    0.9062    0.5409
Pt    0.2226    0.9061    0.5765
Pt    0.2233    0.9434    0.5375
Pt    0.2250    0.9414    0.5763
Pt    0.2229    0.9444    0.6114
Pt    0.2245    0.9811    0.5382
Pt    0.2243    0.9817    0.5734
Pt    0.2252    0.9801    0.6115
Pt    0.0176    0.7758    0.6115
Pt    0.1497    0.9809    0.5019
Pt    0.2243    0.7989    0.5019
Pt    0.0212    0.9631    0.5387
Pt    0.0564    0.9624    0.5393
Pt    0.0561    0.9639    0.5775
Pt    0.0570    0.9613    0.6124
Pt    0.0930    0.7786    0.6118
Pt    0.0942    0.9616    0.5750
Pt    0.0921    0.9597    0.6124
Pt    0.1875    0.9990    0.5557
Pt    0.1295    0.7794    0.5389
Pt    0.1285    0.7776    0.5761
Pt    0.1303    0.7778    0.6130
Pt    0.0175    0.9989    0.5771
Pt    0.1297    0.8147    0.5384
Pt    0.1310    0.8154    0.6139
Pt    0.1293    0.9602    0.5358
Pt    0.1299    0.9630    0.5760
Pt    0.1317    0.9604    0.6117
Pt    0.1692    0.9989    0.6123
Pt    0.1674    0.7776    0.5389
Pt    0.1658    0.7792    0.5762
Pt    0.1668    0.7785    0.6144
Pt    0.1307    0.9992    0.6118
Pt    0.1653    0.8175    0.5391
Pt    0.1664    0.8163    0.5762
Pt    0.2446    0.9997    0.5369
Pt    0.1663    0.8524    0.5390
Pt    0.1672    0.8539    0.5749
Pt    0.1661    0.8900    0.5367
Pt    0.1673    0.8881    0.5751
Pt    0.1680    0.9248    0.5378
Pt    0.1670    0.9253    0.5758
Pt    0.1693    0.9228    0.6127
Pt    0.1690    0.9634    0.5387
Pt    0.1672    0.9608    0.5752
Pt    0.1678    0.9595    0.6130
Pt    0.1676    0.9986    0.5750
Pt    0.2037    0.7785    0.5389
Pt    0.2042    0.7787    0.5761
Pt    0.2051    0.7772    0.6136
Pt    0.1485    0.9992    0.5560
Pt    0.2049    0.8150    0.5400
Pt    0.2036    0.8156    0.5763
Pt    0.2044    0.8148    0.6145
Pt    0.0943    0.9978    0.5362
Pt    0.2052    0.8528    0.5381
Pt    0.2035    0.8536    0.5772
Pt    0.0182    0.9990    0.5385
Pt    0.2043    0.8888    0.5379
Pt    0.2041    0.8885    0.5767
Pt    0.2055    0.9246    0.5403
Pt    0.2041    0.9248    0.5757
Pt    0.2051    0.9250    0.6138
Pt    0.2051    0.9615    0.5384
Pt    0.2051    0.9623    0.5753
Pt    0.2065    0.9615    0.6121
Pt    0.0578    0.9984    0.5374
Pt    0.2419    0.7802    0.5396
Pt    0.2421    0.7786    0.5751
Pt    0.2408    0.7780    0.6144
Pt    0.2443    0.9987    0.6117
Pt    0.2423    0.8165    0.5380
Pt    0.2421    0.8170    0.5762
Pt    0.2415    0.8152    0.6145
Pt    0.0171    0.9989    0.6124
Pt    0.2419    0.8535    0.5398
Pt    0.2418    0.8534    0.5750
Pt    0.2390    0.8543    0.6132
Pt    0.2426    0.8888    0.5395
Pt    0.2420    0.9244    0.5396
Pt    0.2410    0.9633    0.5745
Pt    0.0193    0.9818    0.5201
Pt    0.0183    0.9792    0.5585
Pt    0.0175    0.9821    0.5944
Pt    0.0564    0.9796    0.5183
Pt    0.0555    0.9811    0.5571
Pt    0.0553    0.9803    0.5959
Pt    0.0935    0.7593    0.5943
Pt    0.0941    0.9441    0.5925
Pt    0.0924    0.9798    0.5181
Pt    0.0930    0.9801    0.5559
Pt    0.0935    0.9803    0.5950
Pt    0.1307    0.7614    0.5198
Pt    0.1285    0.7583    0.5572
Pt    0.1279    0.7589    0.5941
Pt    0.1289    0.7983    0.5206
Pt    0.1281    0.7965    0.5581
Pt    0.1312    0.7977    0.5943
Pt    0.1294    0.8350    0.5190
Pt    0.1308    0.9434    0.5570
Pt    0.1302    0.9427    0.5930
Pt    0.1313    0.9793    0.5178
Pt    0.1301    0.9803    0.5557
Pt    0.1309    0.9814    0.5940
Pt    0.1670    0.7597    0.5200
Pt    0.1677    0.7595    0.5568
Pt    0.1679    0.7597    0.5946
Pt    0.1666    0.7981    0.5211
Pt    0.1662    0.7980    0.5575
Pt    0.1673    0.7969    0.5959
Pt    0.1664    0.8344    0.5207
Pt    0.1643    0.8347    0.5586
Pt    0.1665    0.8710    0.5187
Pt    0.1655    0.8702    0.5565
Pt    0.1673    0.9066    0.5559
Pt    0.1705    0.9049    0.5931
Pt    0.1679    0.9445    0.5203
Pt    0.1671    0.9428    0.5566
Pt    0.1670    0.9428    0.5942
Pt    0.1697    0.9795    0.5187
Pt    0.1685    0.9808    0.5567
Pt    0.1682    0.9791    0.5946
Pt    0.2058    0.7611    0.5194
Pt    0.2041    0.7602    0.5565
Pt    0.2045    0.7590    0.5950
Pt    0.2035    0.7977    0.5197
Pt    0.2055    0.7964    0.5565
Pt    0.2037    0.7968    0.5959
Pt    0.2047    0.8344    0.5192
Pt    0.2051    0.8340    0.5576
Pt    0.2052    0.8318    0.5952
Pt    0.2047    0.8718    0.5203
Pt    0.2033    0.8707    0.5576
Pt    0.2040    0.9068    0.5200
Pt    0.2046    0.9067    0.5578
Pt    0.2044    0.9062    0.5947
Pt    0.2048    0.9431    0.5191
Pt    0.2064    0.9431    0.5585
Pt    0.2062    0.9436    0.5940
Pt    0.2061    0.9793    0.5189
Pt    0.2059    0.9806    0.5564
Pt    0.2053    0.9809    0.5926
Pt    0.2422    0.7618    0.5199
Pt    0.2423    0.7593    0.5566
Pt    0.2431    0.7594    0.5941
Pt    0.2424    0.7980    0.5204
Pt    0.2417    0.7988    0.5575
Pt    0.2417    0.7977    0.5940
Pt    0.2420    0.8342    0.5198
Pt    0.2412    0.8347    0.5576
Pt    0.2408    0.8347    0.5956
Pt    0.2412    0.8708    0.5190
Pt    0.2416    0.8724    0.5581
Pt    0.2411    0.8704    0.5948
Pt    0.2414    0.9425    0.5566
Pt    0.2426    0.9808    0.5555
Pt    0.0023    0.8515    0.5216
Pt    0.0036    0.7973    0.5016
Pt    0.0014    0.9633    0.5211
Pt    0.1495    0.9993    0.5922
Pt    0.2055    0.9986    0.5746
Pt    0.0751    0.9984    0.5952
Pt    0.1112    0.9980    0.5174
Pt    0.2251    0.7609    0.5016
Pt    0.1679    0.9991    0.5375
Pt    0.0932    0.9988    0.5757
Pt    0.2068    0.9996    0.5370
Pt    0.1870    0.9998    0.5929
Pt    0.2059    0.9989    0.6121
Pt    0.1128    0.0004    0.5938
Pt    0.1672    0.9996    0.5022
Pt    0.1669    0.8171    0.5022
Pt    0.0037    0.8734    0.5033
Pt    0.1113    0.7615    0.5030
Pt    0.2416    0.8173    0.5018
Pt    0.2232    0.8353    0.5013
Pt    0.1481    0.7606    0.5015
Pt    0.1476    0.8345    0.5015
Pt    0.0215    0.8526    0.5025
Pt    0.1291    0.7789    0.5023
Pt    0.1487    0.7980    0.5025
Pt    0.1852    0.8717    0.5015
Pt    0.2040    0.8894    0.5012
Pt    0.2420    0.9825    0.7417
Pt    0.1310    0.9993    0.6876
Pt    0.2432    0.9823    0.7032
Pt    0.0014    0.7806    0.7060
Pt    0.1307    0.0002    0.6499
Pt    0.2431    0.9801    0.6301
Pt    0.0183    0.9991    0.6498
Pt    0.2411    0.9454    0.7402
Pt    0.2246    0.9999    0.6672
Pt    0.2404    0.8706    0.7412
Pt    0.0553    0.9980    0.6502
Pt    0.2393    0.8343    0.7409
Pt    0.0380    0.7792    0.6291
Pt    0.0387    0.7798    0.6663
Pt    0.0389    0.7794    0.7064
Pt    0.0384    0.7792    0.7423
Pt    0.0375    0.8154    0.6288
Pt    0.0386    0.8166    0.6674
Pt    0.0385    0.8170    0.7066
Pt    0.0400    0.8167    0.7426
Pt    0.0403    0.8543    0.6669
Pt    0.0389    0.8550    0.7040
Pt    0.0381    0.8552    0.7435
Pt    0.0390    0.8895    0.6667
Pt    0.0384    0.8907    0.7042
Pt    0.0392    0.8921    0.7425
Pt    0.0399    0.9252    0.6670
Pt    0.0386    0.9256    0.7064
Pt    0.0386    0.9256    0.7425
Pt    0.0367    0.9610    0.6301
Pt    0.0374    0.9616    0.6686
Pt    0.0362    0.9617    0.7063
Pt    0.0748    0.7789    0.6308
Pt    0.0752    0.7804    0.6676
Pt    0.0752    0.7788    0.7049
Pt    0.0756    0.7790    0.7425
Pt    0.0759    0.8163    0.6682
Pt    0.0757    0.8161    0.7051
Pt    0.0763    0.8170    0.7417
Pt    0.0737    0.8542    0.6683
Pt    0.0767    0.8541    0.7055
Pt    0.0775    0.8539    0.7426
Pt    0.0778    0.8904    0.6698
Pt    0.0783    0.8902    0.7047
Pt    0.0758    0.9259    0.6680
Pt    0.0765    0.9268    0.7060
Pt    0.0755    0.9621    0.6320
Pt    0.0761    0.9631    0.6682
Pt    0.0750    0.9621    0.7077
Pt    0.0752    0.9629    0.7438
Pt    0.1125    0.7783    0.6307
Pt    0.1118    0.7805    0.6683
Pt    0.1116    0.7779    0.7058
Pt    0.1135    0.7780    0.7414
Pt    0.1116    0.8156    0.6317
Pt    0.1146    0.8181    0.7014
Pt    0.1134    0.8174    0.7420
Pt    0.1137    0.8517    0.7417
Pt    0.1131    0.9255    0.6679
Pt    0.1124    0.9274    0.7049
Pt    0.1127    0.9608    0.6304
Pt    0.1136    0.9627    0.6675
Pt    0.1125    0.9623    0.7063
Pt    0.1489    0.7781    0.6320
Pt    0.1482    0.7817    0.6686
Pt    0.1496    0.9609    0.6313
Pt    0.1494    0.9623    0.6675
Pt    0.1517    0.9616    0.7078
Pt    0.1855    0.7769    0.6337
Pt    0.1875    0.9612    0.6313
Pt    0.1888    0.9620    0.6681
Pt    0.1874    0.9637    0.7044
Pt    0.2218    0.7771    0.6326
Pt    0.2230    0.8150    0.6328
Pt    0.1689    0.9983    0.6879
Pt    0.2252    0.9625    0.6312
Pt    0.2248    0.9634    0.7047
Pt    0.2230    0.9644    0.7424
Pt    0.2393    0.7967    0.6324
Pt    0.1115    0.9998    0.7443
Pt    0.2411    0.7588    0.6313
Pt    0.1110    0.9996    0.6310
Pt    0.2039    0.9831    0.7426
Pt    0.0732    0.9988    0.7060
Pt    0.2078    0.9834    0.7052
Pt    0.1860    0.9995    0.7426
Pt    0.2058    0.9817    0.6672
Pt    0.2066    0.9804    0.6308
Pt    0.2432    0.9995    0.6850
Pt    0.2058    0.9435    0.6313
Pt    0.0387    0.7585    0.6475
Pt    0.0381    0.7610    0.6866
Pt    0.0393    0.7598    0.7231
Pt    0.0376    0.7986    0.6483
Pt    0.0403    0.7977    0.6868
Pt    0.0384    0.7994    0.7242
Pt    0.0375    0.8345    0.6471
Pt    0.0393    0.8370    0.6861
Pt    0.0386    0.8365    0.7244
Pt    0.0391    0.8734    0.6859
Pt    0.0386    0.8733    0.7242
Pt    0.0390    0.9079    0.6860
Pt    0.0383    0.9088    0.7239
Pt    0.0378    0.9421    0.6496
Pt    0.0391    0.9440    0.6884
Pt    0.0384    0.9449    0.7259
Pt    0.0376    0.9805    0.6500
Pt    0.0365    0.9807    0.6886
Pt    0.0372    0.9788    0.7274
Pt    0.0735    0.7601    0.6503
Pt    0.0752    0.7605    0.6862
Pt    0.0757    0.7600    0.7232
Pt    0.0751    0.7981    0.6483
Pt    0.0754    0.7981    0.6866
Pt    0.0764    0.7984    0.7234
Pt    0.0758    0.8348    0.6861
Pt    0.0761    0.8355    0.7222
Pt    0.0780    0.8727    0.6871
Pt    0.0790    0.8759    0.7253
Pt    0.0775    0.9087    0.6876
Pt    0.0767    0.9072    0.7247
Pt    0.0760    0.9434    0.6487
Pt    0.0753    0.9462    0.6879
Pt    0.0752    0.9443    0.7260
Pt    0.0750    0.9815    0.6488
Pt    0.0755    0.9809    0.6875
Pt    0.0752    0.9811    0.7257
Pt    0.1118    0.7611    0.6506
Pt    0.1121    0.7614    0.6859
Pt    0.1143    0.7596    0.7240
Pt    0.1129    0.7991    0.6501
Pt    0.1128    0.7991    0.6858
Pt    0.1130    0.7982    0.7219
Pt    0.1149    0.8358    0.7221
Pt    0.1137    0.9424    0.6497
Pt    0.1126    0.9438    0.6864
Pt    0.1125    0.9456    0.7246
Pt    0.1117    0.9815    0.6496
Pt    0.1138    0.9809    0.6883
Pt    0.1123    0.9808    0.7251
Pt    0.1492    0.7603    0.6507
Pt    0.1478    0.7968    0.6487
Pt    0.1495    0.9420    0.6502
Pt    0.1508    0.9804    0.6492
Pt    0.1500    0.9806    0.6869
Pt    0.1498    0.9808    0.7258
Pt    0.1860    0.9802    0.6492
Pt    0.1879    0.9809    0.6870
Pt    0.1866    0.9810    0.7234
Pt    0.2249    0.9801    0.6506
Pt    0.2242    0.9812    0.6859
Pt    0.2245    0.9821    0.7231
Pt    0.0210    0.7793    0.6481
Pt    0.0206    0.7795    0.6853
Pt    0.0204    0.7797    0.7235
Pt    0.0192    0.8171    0.6491
Pt    0.0210    0.8172    0.6869
Pt    0.0198    0.8176    0.7244
Pt    0.0198    0.8524    0.6502
Pt    0.0201    0.8550    0.6852
Pt    0.0196    0.8547    0.7239
Pt    0.0194    0.8912    0.6859
Pt    0.0206    0.8919    0.7228
Pt    0.0209    0.9261    0.6864
Pt    0.0197    0.9260    0.7259
Pt    0.0199    0.9618    0.6508
Pt    0.0183    0.9620    0.6866
Pt    0.0566    0.7790    0.6484
Pt    0.0571    0.7793    0.6866
Pt    0.0575    0.7802    0.7240
Pt    0.0576    0.8164    0.6480
Pt    0.0564    0.8177    0.6860
Pt    0.0576    0.8171    0.7231
Pt    0.0577    0.8539    0.6871
Pt    0.0581    0.8568    0.7242
Pt    0.0579    0.8901    0.6870
Pt    0.0587    0.8911    0.7241
Pt    0.0586    0.9257    0.6489
Pt    0.0576    0.9261    0.6860
Pt    0.0582    0.9252    0.7272
Pt    0.0572    0.9619    0.6506
Pt    0.0560    0.9629    0.6884
Pt    0.0556    0.9631    0.7269
Pt    0.0939    0.7805    0.6493
Pt    0.0943    0.7801    0.6868
Pt    0.0934    0.7791    0.7249
Pt    0.0916    0.8172    0.6494
Pt    0.0946    0.8176    0.6858
Pt    0.0960    0.8181    0.7219
Pt    0.0937    0.8526    0.6861
Pt    0.0963    0.8539    0.7230
Pt    0.0964    0.8722    0.7042
Pt    0.0948    0.9244    0.6496
Pt    0.0943    0.9263    0.6867
Pt    0.0949    0.9276    0.7247
Pt    0.0946    0.9625    0.6509
Pt    0.0935    0.9623    0.6869
Pt    0.0940    0.9629    0.7257
Pt    0.1297    0.7794    0.6509
Pt    0.1312    0.7793    0.6870
Pt    0.1310    0.7801    0.7218
Pt    0.1312    0.8154    0.7233
Pt    0.1122    0.8530    0.7035
Pt    0.1323    0.9616    0.6490
Pt    0.1327    0.9613    0.6882
Pt    0.1311    0.9639    0.7263
Pt    0.1665    0.7787    0.6489
Pt    0.1687    0.9609    0.6499
Pt    0.1684    0.9621    0.6874
Pt    0.2062    0.9625    0.6495
Pt    0.2059    0.9635    0.6875
Pt    0.2055    0.9637    0.7232
Pt    0.2420    0.9643    0.7219
Pt    0.0202    0.7588    0.6307
Pt    0.0209    0.7604    0.6668
Pt    0.0197    0.7599    0.7055
Pt    0.0199    0.7603    0.7429
Pt    0.0209    0.7965    0.6293
Pt    0.0204    0.7982    0.6676
Pt    0.0206    0.7990    0.7044
Pt    0.0196    0.7985    0.7428
Pt    0.0191    0.8349    0.6296
Pt    0.0204    0.8349    0.6680
Pt    0.0198    0.8374    0.7058
Pt    0.0205    0.8362    0.7434
Pt    0.0199    0.8718    0.6669
Pt    0.0194    0.8730    0.7033
Pt    0.0199    0.8751    0.7439
Pt    0.0189    0.9088    0.7053
Pt    0.0200    0.9435    0.6691
Pt    0.0188    0.9439    0.7056
Pt    0.0181    0.9813    0.6324
Pt    0.0189    0.9804    0.6690
Pt    0.0188    0.9806    0.7070
Pt    0.0576    0.7592    0.6305
Pt    0.0571    0.7615    0.6680
Pt    0.0573    0.7593    0.7041
Pt    0.0574    0.7599    0.7415
Pt    0.0564    0.7973    0.6300
Pt    0.0577    0.7988    0.6668
Pt    0.0570    0.7982    0.7056
Pt    0.0572    0.7978    0.7425
Pt    0.0571    0.8349    0.6662
Pt    0.0572    0.8358    0.7046
Pt    0.0573    0.8372    0.7420
Pt    0.0589    0.8737    0.6666
Pt    0.0592    0.8734    0.7061
Pt    0.0595    0.8747    0.7432
Pt    0.0583    0.9069    0.6669
Pt    0.0585    0.9084    0.7059
Pt    0.0570    0.9444    0.6324
Pt    0.0561    0.9446    0.6683
Pt    0.0560    0.9434    0.7077
Pt    0.0567    0.9441    0.7439
Pt    0.0552    0.9800    0.6304
Pt    0.0562    0.9804    0.6698
Pt    0.0550    0.9793    0.7081
Pt    0.0562    0.9802    0.7461
Pt    0.0936    0.7601    0.6325
Pt    0.0934    0.7607    0.6682
Pt    0.0940    0.7601    0.7046
Pt    0.0947    0.7597    0.7418
Pt    0.0938    0.7980    0.6303
Pt    0.0943    0.7981    0.6681
Pt    0.0952    0.7986    0.7047
Pt    0.0949    0.7996    0.7404
Pt    0.0959    0.8357    0.7047
Pt    0.0945    0.8349    0.7421
Pt    0.0964    0.8724    0.7415
Pt    0.0955    0.9076    0.6696
Pt    0.0971    0.9087    0.7064
Pt    0.0955    0.9436    0.6318
Pt    0.0942    0.9434    0.6672
Pt    0.0941    0.9449    0.7057
Pt    0.0937    0.9795    0.6303
Pt    0.0933    0.9810    0.6688
Pt    0.0940    0.9804    0.7059
Pt    0.0942    0.9819    0.7430
Pt    0.1309    0.7604    0.6322
Pt    0.1311    0.7607    0.6684
Pt    0.1313    0.7612    0.7045
Pt    0.1322    0.7583    0.7421
Pt    0.1304    0.7977    0.6317
Pt    0.1304    0.7983    0.7040
Pt    0.1322    0.7972    0.7412
Pt    0.1317    0.9420    0.6310
Pt    0.1306    0.9440    0.6677
Pt    0.1315    0.9447    0.7075
Pt    0.1310    0.9812    0.6316
Pt    0.1320    0.9813    0.6675
Pt    0.1321    0.9797    0.7057
Pt    0.1298    0.9817    0.7443
Pt    0.1681    0.7591    0.6330
Pt    0.1677    0.9416    0.6319
Pt    0.1699    0.9446    0.6687
Pt    0.1685    0.9794    0.6309
Pt    0.1683    0.9803    0.6680
Pt    0.1684    0.9811    0.7062
Pt    0.2031    0.7573    0.6327
Pt    0.2046    0.7961    0.6330
Pt    0.0730    0.0003    0.7458
Pt    0.1123    0.9994    0.6690
Pt    0.0015    0.8359    0.6876
Pt    0.2056    0.9995    0.6494
Pt    0.0545    0.9970    0.7263
Pt    0.0756    0.9992    0.6690
Pt    0.1682    0.9990    0.6484
Pt    0.0174    0.9998    0.6890
Pt    0.1477    0.9999    0.7442
Pt    0.2062    0.0001    0.6859
Pt    0.0942    0.0002    0.6878
Pt    0.0756    0.0002    0.6300
Pt    0.0199    0.9983    0.7255
Pt    0.0369    0.9990    0.7069
Pt    0.0023    0.7782    0.6306
Pt    0.1675    0.9997    0.7257
Pt    0.1870    1.0000    0.6302
Pt    0.1504    1.0000    0.7063
Pt    0.0362    0.9996    0.6692
Pt    0.1493    0.0002    0.6300
Pt    0.1862    0.9995    0.6672
Pt    0.0563    0.9985    0.6872
Pt    0.0366    0.9981    0.7453
Pt    0.0022    0.7805    0.6676
Pt    0.0934    0.9988    0.7243
Pt    0.2242    0.9981    0.6312
Pt    0.1873    0.0005    0.7058
Pt    0.0017    0.8929    0.7411
Pt    0.2048    0.0005    0.7238
Pt    0.0362    0.9984    0.6315
Pt    0.2432    0.9988    0.6495
Pt    0.0924    0.0008    0.6492
Pt    0.0023    0.7983    0.7234
Pt    0.1125    0.9994    0.7066
Pt    0.0014    0.8187    0.7439
Pt    0.0019    0.7991    0.6866
Pt    0.1308    0.9991    0.7237
Pt    0.1495    0.9993    0.6677
Pt    0.0022    0.8731    0.7241
Pt    0.0021    0.7601    0.6855
Pt    0.0015    0.7795    0.7429
Pt    0.0019    0.7978    0.6485
Pt    0.0015    0.8168    0.6675
Pt    0.0012    0.7597    0.6499
Pt    0.0016    0.9796    0.6504
Pt    0.0025    0.8552    0.7439
Pt    0.2244    0.0010    0.7055
Pt    0.0011    0.8375    0.7240
Pt    0.2384    0.9829    0.8518
Pt    0.2396    0.9845    0.8157
Pt    0.2417    0.9830    0.7779
Pt    0.2393    0.9468    0.8501
Pt    0.2407    0.9469    0.8159
Pt    0.2415    0.9450    0.7777
Pt    0.2411    0.9097    0.8531
Pt    0.2386    0.9095    0.8159
Pt    0.2394    0.9081    0.7760
Pt    0.0940    0.9999    0.7620
Pt    0.0043    0.7596    0.8733
Pt    0.0389    0.7782    0.7793
Pt    0.0393    0.7795    0.8173
Pt    0.0395    0.7796    0.8538
Pt    0.0394    0.8162    0.7802
Pt    0.0396    0.8160    0.8176
Pt    0.0393    0.8163    0.8548
Pt    0.0394    0.8548    0.7793
Pt    0.0392    0.8540    0.8170
Pt    0.0388    0.8519    0.8541
Pt    0.0397    0.8893    0.8538
Pt    0.0746    0.7782    0.7795
Pt    0.0774    0.7794    0.8166
Pt    0.0766    0.7802    0.8536
Pt    0.0763    0.8167    0.7787
Pt    0.0774    0.8170    0.8172
Pt    0.0783    0.8151    0.8540
Pt    0.0756    0.8536    0.7784
Pt    0.0758    0.8535    0.8163
Pt    0.1133    0.7781    0.7788
Pt    0.1133    0.7767    0.8166
Pt    0.1132    0.8151    0.7791
Pt    0.1138    0.8182    0.8167
Pt    0.1529    0.7747    0.7768
Pt    0.1497    0.7778    0.8153
Pt    0.1492    0.8148    0.7787
Pt    0.1504    0.8152    0.8154
Pt    0.1836    0.7775    0.7783
Pt    0.1845    0.7752    0.8179
Pt    0.1852    0.7773    0.8525
Pt    0.1847    0.8141    0.7778
Pt    0.1847    0.8150    0.8152
Pt    0.1854    0.8155    0.8517
Pt    0.1843    0.8515    0.7778
Pt    0.1858    0.8518    0.8149
Pt    0.1843    0.8527    0.8526
Pt    0.2215    0.7763    0.8154
Pt    0.2221    0.7772    0.8521
Pt    0.2214    0.8147    0.7777
Pt    0.2216    0.8146    0.8147
Pt    0.2204    0.8154    0.8530
Pt    0.2219    0.8535    0.7769
Pt    0.2207    0.8534    0.8156
Pt    0.2212    0.8529    0.8539
Pt    0.2205    0.8903    0.7761
Pt    0.2201    0.8899    0.8168
Pt    0.2201    0.8900    0.8536
Pt    0.2217    0.9280    0.7791
Pt    0.2207    0.9281    0.8155
Pt    0.2208    0.9279    0.8522
Pt    0.2228    0.9650    0.7780
Pt    0.2208    0.9656    0.8149
Pt    0.2196    0.9651    0.8523
Pt    0.2402    0.8730    0.8537
Pt    0.2396    0.8717    0.8155
Pt    0.2393    0.8720    0.7779
Pt    0.0019    0.8912    0.7807
Pt    0.2400    0.8351    0.8543
Pt    0.2394    0.8337    0.8157
Pt    0.2411    0.8340    0.7770
Pt    0.2410    0.7964    0.8513
Pt    0.2391    0.7955    0.8137
Pt    0.2395    0.7954    0.7763
Pt    0.2400    0.7589    0.8512
Pt    0.2386    0.7587    0.8141
Pt    0.0012    0.8908    0.8567
Pt    0.2035    0.9826    0.7779
Pt    0.2018    0.9455    0.8518
Pt    0.2043    0.9472    0.7776
Pt    0.2007    0.9089    0.8527
Pt    0.2034    0.9079    0.8150
Pt    0.2014    0.8705    0.8544
Pt    0.0378    0.7596    0.7612
Pt    0.0397    0.7604    0.7979
Pt    0.0409    0.7609    0.8349
Pt    0.0398    0.7618    0.8746
Pt    0.0378    0.7979    0.7620
Pt    0.0384    0.7982    0.7982
Pt    0.0406    0.7986    0.8357
Pt    0.0382    0.7978    0.8730
Pt    0.0394    0.8356    0.7611
Pt    0.0382    0.8362    0.7985
Pt    0.0403    0.8347    0.8351
Pt    0.0388    0.8342    0.8728
Pt    0.0390    0.8759    0.7611
Pt    0.0390    0.8722    0.7988
Pt    0.0388    0.8721    0.8358
Pt    0.0387    0.8699    0.8726
Pt    0.0394    0.9078    0.8727
Pt    0.0390    0.9452    0.8702
Pt    0.0388    0.9822    0.8701
Pt    0.0763    0.7589    0.7606
Pt    0.0757    0.7595    0.7985
Pt    0.0761    0.7604    0.8354
Pt    0.0765    0.7606    0.8729
Pt    0.0766    0.7976    0.7597
Pt    0.0772    0.7971    0.7982
Pt    0.0773    0.7970    0.8336
Pt    0.0782    0.7975    0.8718
Pt    0.0766    0.8359    0.7602
Pt    0.0773    0.8361    0.7987
Pt    0.0764    0.8351    0.8360
Pt    0.0787    0.8720    0.7613
Pt    0.0757    0.8703    0.7965
Pt    0.0739    0.8697    0.8727
Pt    0.0762    0.9805    0.7618
Pt    0.1141    0.7596    0.7615
Pt    0.1136    0.7585    0.7973
Pt    0.1140    0.7603    0.8374
Pt    0.1129    0.7968    0.7590
Pt    0.1138    0.7974    0.7977
Pt    0.1136    0.7975    0.8355
Pt    0.1131    0.8342    0.7608
Pt    0.1144    0.8362    0.7981
Pt    0.1503    0.7584    0.7966
Pt    0.1489    0.7971    0.7598
Pt    0.1479    0.7957    0.7960
Pt    0.1491    0.7971    0.8341
Pt    0.1501    0.8343    0.7959
Pt    0.1486    0.8349    0.8341
Pt    0.1847    0.7594    0.7966
Pt    0.1845    0.7971    0.7607
Pt    0.1865    0.7955    0.7959
Pt    0.1846    0.7969    0.8343
Pt    0.1853    0.7956    0.8713
Pt    0.1840    0.8341    0.7960
Pt    0.1846    0.8344    0.8340
Pt    0.1834    0.8333    0.8710
Pt    0.1850    0.8708    0.7966
Pt    0.1855    0.8710    0.8339
Pt    0.2218    0.7578    0.8343
Pt    0.2224    0.7595    0.8712
Pt    0.2220    0.7952    0.7958
Pt    0.2219    0.7963    0.8339
Pt    0.2209    0.7969    0.8716
Pt    0.2205    0.8327    0.7589
Pt    0.2220    0.8347    0.7950
Pt    0.2221    0.8337    0.8347
Pt    0.2210    0.8348    0.8725
Pt    0.2208    0.8714    0.7593
Pt    0.2198    0.8729    0.7951
Pt    0.2216    0.8707    0.8364
Pt    0.2197    0.8723    0.8717
Pt    0.2210    0.9084    0.7966
Pt    0.2216    0.9092    0.8352
Pt    0.2202    0.9091    0.8702
Pt    0.2228    0.9452    0.7600
Pt    0.2213    0.9462    0.7968
Pt    0.2190    0.9470    0.8333
Pt    0.2210    0.9459    0.8713
Pt    0.2232    0.9829    0.7602
Pt    0.2214    0.9832    0.7965
Pt    0.2204    0.9847    0.8694
Pt    0.0195    0.7787    0.7619
Pt    0.0201    0.7794    0.7986
Pt    0.0207    0.7805    0.8347
Pt    0.0576    0.9997    0.8709
Pt    0.0205    0.8169    0.7601
Pt    0.0203    0.8186    0.7993
Pt    0.0208    0.8160    0.8364
Pt    0.0016    0.8348    0.8361
Pt    0.0208    0.8555    0.7630
Pt    0.0203    0.8551    0.7983
Pt    0.0212    0.8526    0.8353
Pt    0.0192    0.8526    0.8730
Pt    0.0022    0.7608    0.8358
Pt    0.0194    0.8907    0.8371
Pt    0.0224    0.8900    0.8727
Pt    0.0199    0.9268    0.8715
Pt    0.0207    0.9644    0.8690
Pt    0.0572    0.7781    0.7609
Pt    0.0569    0.7785    0.7985
Pt    0.0575    0.7792    0.8358
Pt    0.0586    0.7792    0.8727
Pt    0.0584    0.8170    0.7607
Pt    0.0585    0.8159    0.7969
Pt    0.0588    0.8154    0.8351
Pt    0.0571    0.8548    0.7609
Pt    0.0572    0.8538    0.7976
Pt    0.0576    0.8544    0.8358
Pt    0.0581    0.8514    0.8731
Pt    0.0596    0.8901    0.8727
Pt    0.0581    0.9632    0.8706
Pt    0.0944    0.7783    0.7601
Pt    0.0943    0.7780    0.7982
Pt    0.0956    0.7776    0.8348
Pt    0.0952    0.7793    0.8709
Pt    0.0951    0.8153    0.7611
Pt    0.0947    0.8171    0.7986
Pt    0.0963    0.8177    0.8359
Pt    0.0961    0.8538    0.7600
Pt    0.0953    0.8534    0.7992
Pt    0.0202    0.7797    0.8735
Pt    0.1326    0.7779    0.7593
Pt    0.1317    0.7763    0.7972
Pt    0.1323    0.7780    0.8334
Pt    0.1311    0.8172    0.7601
Pt    0.1311    0.8162    0.7970
Pt    0.1324    0.8156    0.8346
Pt    0.1673    0.7778    0.7981
Pt    0.1664    0.7784    0.8341
Pt    0.1672    0.8136    0.7966
Pt    0.1672    0.8158    0.8333
Pt    0.1674    0.8535    0.7971
Pt    0.1679    0.8520    0.8337
Pt    0.2033    0.7760    0.7951
Pt    0.2028    0.7764    0.8347
Pt    0.2050    0.7789    0.8718
Pt    0.2021    0.8143    0.7598
Pt    0.2022    0.8158    0.7963
Pt    0.2041    0.8151    0.8336
Pt    0.2018    0.8160    0.8730
Pt    0.2030    0.8525    0.7959
Pt    0.2031    0.8523    0.8336
Pt    0.2010    0.8526    0.8724
Pt    0.2017    0.8902    0.8343
Pt    0.2009    0.8912    0.8720
Pt    0.2028    0.9294    0.7957
Pt    0.2026    0.9272    0.8326
Pt    0.2017    0.9293    0.8706
Pt    0.2051    0.9639    0.7596
Pt    0.2039    0.9651    0.7949
Pt    0.2033    0.9648    0.8716
Pt    0.2405    0.7766    0.7956
Pt    0.2390    0.7769    0.8335
Pt    0.2400    0.7778    0.8711
Pt    0.2397    0.8141    0.7586
Pt    0.2405    0.8142    0.7974
Pt    0.2401    0.8155    0.8338
Pt    0.2397    0.8154    0.8709
Pt    0.2384    0.8526    0.7590
Pt    0.2403    0.8530    0.7959
Pt    0.2399    0.8527    0.8347
Pt    0.2402    0.8537    0.8712
Pt    0.2397    0.8892    0.7588
Pt    0.2389    0.8916    0.7972
Pt    0.2388    0.8910    0.8351
Pt    0.2390    0.8904    0.8711
Pt    0.2395    0.9267    0.7580
Pt    0.2397    0.9269    0.7959
Pt    0.2399    0.9274    0.8331
Pt    0.2397    0.9279    0.8713
Pt    0.2416    0.9640    0.7597
Pt    0.2409    0.9648    0.7964
Pt    0.2390    0.9661    0.8334
Pt    0.2394    0.9649    0.8697
Pt    0.0200    0.7604    0.7799
Pt    0.0213    0.7611    0.8176
Pt    0.0213    0.7608    0.8540
Pt    0.0192    0.7996    0.7794
Pt    0.0202    0.7983    0.8170
Pt    0.0203    0.7976    0.8547
Pt    0.0203    0.8354    0.7793
Pt    0.0199    0.8353    0.8173
Pt    0.0196    0.8343    0.8543
Pt    0.0223    0.8735    0.7798
Pt    0.0205    0.8733    0.8181
Pt    0.0204    0.8701    0.8560
Pt    0.0200    0.9087    0.8544
Pt    0.0577    0.7594    0.7793
Pt    0.0590    0.7596    0.8163
Pt    0.0584    0.7609    0.8543
Pt    0.0573    0.7972    0.7786
Pt    0.0581    0.7972    0.8161
Pt    0.0577    0.7992    0.8562
Pt    0.0576    0.8357    0.7801
Pt    0.0571    0.8340    0.8153
Pt    0.0586    0.8332    0.8551
Pt    0.0581    0.8740    0.7792
Pt    0.0573    0.8713    0.8542
Pt    0.0944    0.7596    0.7801
Pt    0.0947    0.7592    0.8164
Pt    0.0950    0.7606    0.8543
Pt    0.0942    0.7969    0.7795
Pt    0.0955    0.7976    0.8168
Pt    0.0950    0.7985    0.8530
Pt    0.0951    0.8364    0.7781
Pt    0.0952    0.8352    0.8168
Pt    0.0969    0.8689    0.7798
Pt    0.1325    0.7587    0.7783
Pt    0.1328    0.7584    0.8170
Pt    0.1317    0.7951    0.7780
Pt    0.1311    0.7977    0.8156
Pt    0.1314    0.8351    0.7796
Pt    0.1333    0.8348    0.8153
Pt    0.1665    0.7952    0.7781
Pt    0.1681    0.7958    0.8146
Pt    0.1669    0.7978    0.8530
Pt    0.1667    0.8328    0.7777
Pt    0.1663    0.8355    0.8154
Pt    0.1673    0.8337    0.8536
Pt    0.2031    0.7593    0.8138
Pt    0.2054    0.7953    0.7769
Pt    0.2035    0.7946    0.8152
Pt    0.2034    0.7954    0.8526
Pt    0.2028    0.8333    0.7776
Pt    0.2030    0.8340    0.8152
Pt    0.2024    0.8340    0.8532
Pt    0.2022    0.8721    0.7775
Pt    0.2033    0.8723    0.8151
Pt    0.0196    0.8164    0.8725
Pt    0.0014    0.9089    0.8726
Pt    0.0740    0.9999    0.7785
Pt    0.0028    0.8744    0.7995
Pt    0.0016    0.8564    0.7801
Pt    0.0200    0.0004    0.8691
Pt    0.0013    0.8708    0.8740
Pt    0.0013    0.7797    0.7795
Pt    0.0017    0.7978    0.8364
Pt    0.0023    0.7795    0.8170
Pt    0.0019    0.7603    0.7613
Pt    0.0015    0.9818    0.8691
Pt    0.0014    0.8366    0.8002
Pt    0.0031    0.8749    0.7614
Pt    0.0021    0.7602    0.7992
Pt    0.0023    0.7784    0.8547
Pt    0.0018    0.8182    0.7809
Pt    0.0015    0.8158    0.8174
Pt    0.0017    0.8719    0.8377
Pt    0.0022    0.7986    0.7990
Pt    0.0012    0.8364    0.7616
Pt    0.0014    0.7974    0.8753
Pt    0.0012    0.8520    0.8545
Pt    0.0015    0.7986    0.7619
Pt    0.2411    0.0005    0.7605
Pt    0.1296    0.9998    0.7621
Pt    0.0757    0.0004    0.0010
Pt    0.0763    0.9641    0.0000
Pt    0.2402    0.9852    0.9642
Pt    0.2402    0.9831    0.9292
Pt    0.0768    0.0003    0.9253
Pt    0.2382    0.9827    0.8887
Pt    0.2416    0.9457    0.9658
Pt    0.2411    0.9466    0.9282
Pt    0.0572    0.0001    0.9068
Pt    0.2394    0.9462    0.8896
Pt    0.2410    0.9083    0.9660
Pt    0.0382    0.8513    0.8916
Pt    0.0395    0.8890    0.8915
Pt    0.0399    0.8885    0.9273
Pt    0.0390    0.8889    0.9641
Pt    0.0394    0.9266    0.8888
Pt    0.0379    0.9265    0.9266
Pt    0.0390    0.9252    0.9642
Pt    0.0385    0.9625    0.8882
Pt    0.0385    0.9635    0.9262
Pt    0.0395    0.9635    0.9630
Pt    0.0775    0.8880    0.9638
Pt    0.0744    0.9275    0.9263
Pt    0.0763    0.9274    0.9647
Pt    0.0768    0.9630    0.8881
Pt    0.0763    0.9635    0.9265
Pt    0.0771    0.9634    0.9636
Pt    0.1129    0.9258    0.9267
Pt    0.1136    0.9269    0.9661
Pt    0.1144    0.9628    0.9252
Pt    0.1124    0.9633    0.9635
Pt    0.1480    0.9266    0.9267
Pt    0.1482    0.9259    0.9650
Pt    0.1498    0.9630    0.9267
Pt    0.1489    0.9622    0.9656
Pt    0.1846    0.8905    0.9296
Pt    0.1864    0.8911    0.9645
Pt    0.1852    0.9264    0.8911
Pt    0.1862    0.9266    0.9287
Pt    0.1866    0.9281    0.9668
Pt    0.1851    0.9650    0.8896
Pt    0.1848    0.9637    0.9274
Pt    0.1872    0.9671    0.9669
Pt    0.2220    0.7788    0.8902
Pt    0.2216    0.7782    0.9267
Pt    0.2244    0.7782    0.9649
Pt    0.2212    0.8158    0.8900
Pt    0.2213    0.8160    0.9278
Pt    0.2225    0.8158    0.9654
Pt    0.2200    0.8537    0.8905
Pt    0.2208    0.8538    0.9279
Pt    0.2239    0.8547    0.9647
Pt    0.2208    0.8904    0.8893
Pt    0.2217    0.8902    0.9271
Pt    0.2219    0.8906    0.9656
Pt    0.2190    0.9277    0.8894
Pt    0.2216    0.9284    0.9282
Pt    0.2217    0.9274    0.9672
Pt    0.2199    0.9641    0.8903
Pt    0.2229    0.9651    0.9279
Pt    0.2227    0.9663    0.9658
Pt    0.2409    0.9108    0.9266
Pt    0.2392    0.9085    0.8899
Pt    0.2403    0.8726    0.9640
Pt    0.2397    0.8736    0.9276
Pt    0.2389    0.8722    0.8899
Pt    0.2408    0.8342    0.9651
Pt    0.2398    0.8352    0.9263
Pt    0.2395    0.8357    0.8901
Pt    0.2410    0.7978    0.9639
Pt    0.2397    0.7969    0.9272
Pt    0.2393    0.7972    0.8898
Pt    0.0018    0.8688    0.9822
Pt    0.0386    0.8696    0.9096
Pt    0.0392    0.8707    0.9463
Pt    0.0380    0.8699    0.9826
Pt    0.0390    0.9068    0.9083
Pt    0.0400    0.9077    0.9450
Pt    0.0390    0.9075    0.9826
Pt    0.0376    0.9449    0.9080
Pt    0.0374    0.9444    0.9455
Pt    0.0385    0.9443    0.9823
Pt    0.0400    0.9817    0.9061
Pt    0.0385    0.9828    0.9435
Pt    0.0381    0.9816    0.9822
Pt    0.0763    0.7613    0.9801
Pt    0.0757    0.9093    0.9464
Pt    0.0760    0.9072    0.9826
Pt    0.0759    0.9459    0.9081
Pt    0.0771    0.9454    0.9456
Pt    0.0759    0.9453    0.9829
Pt    0.0757    0.9820    0.9078
Pt    0.0768    0.9818    0.9446
Pt    0.0761    0.9818    0.9809
Pt    0.1136    0.9069    0.9834
Pt    0.1150    0.9431    0.9449
Pt    0.1129    0.9442    0.9837
Pt    0.1149    0.9818    0.9075
Pt    0.1137    0.9820    0.9446
Pt    0.1134    0.9816    0.9831
Pt    0.1492    0.9447    0.9457
Pt    0.1505    0.9430    0.9846
Pt    0.1491    0.9827    0.9459
Pt    0.1493    0.9819    0.9819
Pt    0.1843    0.9081    0.9097
Pt    0.1861    0.9099    0.9474
Pt    0.1865    0.9103    0.9827
Pt    0.1850    0.9449    0.9088
Pt    0.1859    0.9463    0.9477
Pt    0.1873    0.9471    0.9844
Pt    0.1852    0.9833    0.9089
Pt    0.1844    0.9821    0.9441
Pt    0.2213    0.7596    0.9450
Pt    0.2223    0.7597    0.9831
Pt    0.2211    0.7977    0.9094
Pt    0.2224    0.7980    0.9467
Pt    0.2218    0.7969    0.9819
Pt    0.2212    0.8357    0.9082
Pt    0.2220    0.8336    0.9459
Pt    0.2201    0.8722    0.9088
Pt    0.2216    0.8733    0.9469
Pt    0.2235    0.8721    0.9832
Pt    0.2226    0.9089    0.9101
Pt    0.2225    0.9106    0.9462
Pt    0.2215    0.9087    0.9855
Pt    0.2218    0.9466    0.9101
Pt    0.2227    0.9476    0.9474
Pt    0.2221    0.9476    0.9843
Pt    0.2211    0.9847    0.9093
Pt    0.2225    0.9848    0.9468
Pt    0.0211    0.8536    0.9088
Pt    0.0205    0.8905    0.9089
Pt    0.0206    0.8884    0.9456
Pt    0.0195    0.8881    0.9822
Pt    0.0203    0.9264    0.9084
Pt    0.0190    0.9256    0.9451
Pt    0.0206    0.9250    0.9837
Pt    0.0198    0.9636    0.9067
Pt    0.0197    0.9631    0.9461
Pt    0.0198    0.9636    0.9823
Pt    0.0592    0.8875    0.9093
Pt    0.0586    0.8889    0.9469
Pt    0.0587    0.8886    0.9837
Pt    0.0579    0.9268    0.9073
Pt    0.0564    0.9271    0.9447
Pt    0.0571    0.9264    0.9830
Pt    0.0586    0.9640    0.9074
Pt    0.0578    0.9622    0.9437
Pt    0.0568    0.9641    0.9820
Pt    0.0761    0.8917    0.9265
Pt    0.0948    0.8894    0.9835
Pt    0.0922    0.9259    0.9090
Pt    0.0965    0.9244    0.9459
Pt    0.0939    0.9261    0.9833
Pt    0.0956    0.9637    0.9061
Pt    0.0959    0.9635    0.9438
Pt    0.0948    0.9627    0.9826
Pt    0.1315    0.9245    0.9471
Pt    0.1316    0.9254    0.9847
Pt    0.1314    0.9630    0.9456
Pt    0.1304    0.9631    0.9835
Pt    0.1668    0.9267    0.9105
Pt    0.1675    0.9275    0.9467
Pt    0.1681    0.9642    0.9092
Pt    0.1669    0.9639    0.9472
Pt    0.1683    0.9621    0.9837
Pt    0.2054    0.7794    0.9469
Pt    0.2032    0.7797    0.9806
Pt    0.2044    0.8162    0.9087
Pt    0.2014    0.8537    0.9083
Pt    0.2042    0.8533    0.9468
Pt    0.2014    0.8896    0.9095
Pt    0.2038    0.8913    0.9457
Pt    0.2036    0.8903    0.9837
Pt    0.2029    0.9271    0.9087
Pt    0.2042    0.9275    0.9474
Pt    0.2049    0.9270    0.9848
Pt    0.2025    0.9648    0.9085
Pt    0.2040    0.9677    0.9470
Pt    0.2405    0.7784    0.9088
Pt    0.2399    0.7789    0.9456
Pt    0.2426    0.7786    0.9829
Pt    0.2403    0.8161    0.9082
Pt    0.2409    0.8161    0.9456
Pt    0.2403    0.8167    0.9839
Pt    0.2397    0.8549    0.9081
Pt    0.2412    0.8527    0.9470
Pt    0.2393    0.8519    0.9853
Pt    0.2410    0.8912    0.9080
Pt    0.2406    0.8919    0.9452
Pt    0.2394    0.8905    0.9848
Pt    0.2403    0.9283    0.9081
Pt    0.2400    0.9278    0.9472
Pt    0.2402    0.9270    0.9841
Pt    0.2394    0.9657    0.9081
Pt    0.2402    0.9663    0.9475
Pt    0.2399    0.9657    0.9854
Pt    0.1490    0.0007    0.9630
Pt    0.0190    0.8338    0.8902
Pt    0.0207    0.8710    0.8910
Pt    0.0202    0.8723    0.9272
Pt    0.0196    0.8694    0.9642
Pt    0.0203    0.9078    0.8905
Pt    0.0204    0.9082    0.9272
Pt    0.0202    0.9065    0.9631
Pt    0.0201    0.9452    0.8884
Pt    0.0201    0.9452    0.9271
Pt    0.0194    0.9437    0.9652
Pt    0.0194    0.9814    0.8884
Pt    0.0211    0.9818    0.9250
Pt    0.0192    0.9838    0.9625
Pt    0.0559    0.8694    0.8900
Pt    0.0567    0.8709    0.9654
Pt    0.0588    0.9078    0.8910
Pt    0.0573    0.9082    0.9261
Pt    0.0580    0.9077    0.9641
Pt    0.0564    0.9461    0.8904
Pt    0.0568    0.9451    0.9266
Pt    0.0567    0.9453    0.9633
Pt    0.0590    0.9814    0.8877
Pt    0.0578    0.9825    0.9271
Pt    0.0583    0.9813    0.9618
Pt    0.0934    0.8908    0.9448
Pt    0.0938    0.9082    0.9261
Pt    0.0958    0.9064    0.9646
Pt    0.0759    0.9275    0.8893
Pt    0.0946    0.9438    0.9259
Pt    0.0956    0.9449    0.9639
Pt    0.0934    0.9817    0.8877
Pt    0.0975    0.9833    0.9245
Pt    0.0943    0.9822    0.9627
Pt    0.1313    0.9446    0.9254
Pt    0.1308    0.9452    0.9655
Pt    0.1315    0.9824    0.9261
Pt    0.1313    0.9820    0.9641
Pt    0.1659    0.9076    0.9300
Pt    0.1679    0.9084    0.9639
Pt    0.1674    0.9444    0.9271
Pt    0.1665    0.9434    0.9662
Pt    0.1668    0.9826    0.9640
Pt    0.2043    0.7607    0.9641
Pt    0.2046    0.7970    0.9279
Pt    0.2044    0.7982    0.9639
Pt    0.2016    0.8345    0.8910
Pt    0.2037    0.8341    0.9267
Pt    0.2003    0.8714    0.8909
Pt    0.2032    0.8722    0.9278
Pt    0.2045    0.8717    0.9652
Pt    0.2030    0.9085    0.8914
Pt    0.2040    0.9092    0.9281
Pt    0.2048    0.9088    0.9649
Pt    0.2021    0.9463    0.8894
Pt    0.2040    0.9468    0.9280
Pt    0.2042    0.9486    0.9649
Pt    0.2035    0.9833    0.8896
Pt    0.2038    0.9834    0.9272
Pt    0.2398    0.7601    0.8898
Pt    0.2403    0.7603    0.9265
Pt    0.2416    0.7598    0.9639
Pt    0.0198    0.9997    0.9816
Pt    0.0951    0.0003    0.9819
Pt    0.0731    0.7791    0.0003
Pt    0.0942    0.7618    0.9989
Pt    0.0181    0.8705    0.0001
Pt    0.0949    0.9446    0.8898
Pt    0.0020    0.9636    0.9261
Pt    0.0394    0.0002    0.9246
Pt    0.0393    0.0001    0.0005
Pt    0.0021    0.0004    0.8875
Pt    0.1321    0.0006    0.9440
Pt    0.1137    0.0005    0.9624
Pt    0.0762    0.0005    0.8881
Pt    0.0033    0.7766    0.8908
Pt    0.0024    0.9620    0.8874
Pt    0.0015    0.9820    0.9437
Pt    0.1305    0.7625    0.9993
Pt    0.0202    0.0008    0.9442
Pt    0.0205    0.0009    0.9057
Pt    0.0970    0.9999    0.9054
Pt    0.2027    0.7618    0.9996
Pt    0.0382    0.0010    0.8890
Pt    0.0015    0.9055    0.9819
Pt    0.0011    0.0005    0.9992
Pt    0.0209    0.9818    0.0008
Pt    0.0946    0.0008    0.9437
Pt    0.1312    0.0003    0.9811
Pt    0.0578    1.0000    0.9823
Pt    0.1495    0.9616    0.9993
Pt    0.0573    0.9444    0.0009
Pt    0.0755    0.0008    0.9629
Pt    0.0012    0.9628    0.0007
Pt    0.0937    0.9820    0.0009
Pt    0.0014    0.9628    0.9624
Pt    0.0018    0.8882    0.8911
Pt    0.0012    0.9260    0.9245
Pt    0.0017    0.9826    0.9076
Pt    0.0020    0.8703    0.9448
Pt    0.0016    0.8514    0.8933
Pt    0.0028    0.8699    0.9100
Pt    0.0380    0.9634    0.0011
Pt    0.2223    0.7792    0.0006
Pt    0.2615    0.0375    0.1107
Pt    0.2615    0.0759    0.1121
Pt    0.2600    0.1104    0.0381
Pt    0.2607    0.1099    0.0751
Pt    0.2612    0.1120    0.1130
Pt    0.4999    0.0178    0.1125
Pt    0.2602    0.1467    0.0384
Pt    0.2610    0.1467    0.0758
Pt    0.2598    0.1491    0.1133
Pt    0.4436    0.0021    0.0035
Pt    0.2619    0.1840    0.0388
Pt    0.2602    0.1841    0.0739
Pt    0.2602    0.1849    0.1139
Pt    0.4980    0.0381    0.0194
Pt    0.2605    0.2204    0.0384
Pt    0.2606    0.2218    0.0760
Pt    0.2603    0.2218    0.1127
Pt    0.4992    0.0368    0.0568
Pt    0.5002    0.0746    0.0180
Pt    0.4976    0.2260    0.0916
Pt    0.2987    0.1111    0.1106
Pt    0.4623    0.0198    0.0020
Pt    0.2968    0.1476    0.0399
Pt    0.2974    0.1473    0.0758
Pt    0.3000    0.1532    0.1150
Pt    0.4990    0.0556    0.1120
Pt    0.2985    0.1845    0.0384
Pt    0.2986    0.1845    0.0757
Pt    0.2996    0.1839    0.1147
Pt    0.4987    0.0932    0.0757
Pt    0.2976    0.2226    0.0390
Pt    0.2982    0.2201    0.0778
Pt    0.2982    0.2221    0.1127
Pt    0.3905    0.2022    0.0016
Pt    0.4818    0.0014    0.0013
Pt    0.3356    0.1454    0.0395
Pt    0.4987    0.2243    0.0539
Pt    0.3354    0.1842    0.0373
Pt    0.3348    0.1851    0.0758
Pt    0.4998    0.1303    0.1127
Pt    0.3358    0.2222    0.0376
Pt    0.3349    0.2215    0.0764
Pt    0.3351    0.2218    0.1134
Pt    0.3697    0.0047    0.0044
Pt    0.3361    0.1837    0.0021
Pt    0.3717    0.1843    0.0397
Pt    0.3720    0.1844    0.0762
Pt    0.4985    0.1869    0.0918
Pt    0.3719    0.2241    0.0392
Pt    0.3712    0.2222    0.0750
Pt    0.4078    0.1837    0.0376
Pt    0.4072    0.1871    0.0768
Pt    0.4069    0.2235    0.0391
Pt    0.4071    0.2250    0.0767
Pt    0.5000    0.1486    0.0548
Pt    0.4428    0.1128    0.1116
Pt    0.4430    0.1465    0.0371
Pt    0.4428    0.1497    0.0750
Pt    0.4440    0.1486    0.1117
Pt    0.4441    0.1853    0.0386
Pt    0.4427    0.1856    0.0731
Pt    0.4450    0.1862    0.1112
Pt    0.4431    0.2238    0.0358
Pt    0.4433    0.2255    0.0749
Pt    0.4438    0.2229    0.1120
Pt    0.3170    0.1290    0.0023
Pt    0.4986    0.1678    0.0366
Pt    0.4982    0.2052    0.1110
Pt    0.4818    0.0380    0.0384
Pt    0.4803    0.0376    0.0748
Pt    0.4805    0.0379    0.1116
Pt    0.4815    0.0753    0.0374
Pt    0.4803    0.0755    0.0743
Pt    0.4807    0.0752    0.1117
Pt    0.4823    0.1119    0.0371
Pt    0.4797    0.1113    0.0755
Pt    0.4801    0.1120    0.1137
Pt    0.4985    0.0553    0.0751
Pt    0.4809    0.1486    0.0369
Pt    0.4800    0.1489    0.0749
Pt    0.4814    0.1491    0.1121
Pt    0.4796    0.1866    0.0369
Pt    0.4804    0.1873    0.0733
Pt    0.4800    0.1862    0.1113
Pt    0.4795    0.2250    0.0348
Pt    0.4799    0.2237    0.0730
Pt    0.4794    0.2249    0.1117
Pt    0.2606    0.0939    0.0953
Pt    0.2599    0.1289    0.0200
Pt    0.2607    0.1289    0.0563
Pt    0.2622    0.1286    0.0935
Pt    0.2610    0.1654    0.0187
Pt    0.2599    0.1656    0.0571
Pt    0.2599    0.1665    0.0939
Pt    0.2599    0.2021    0.0195
Pt    0.2595    0.2037    0.0567
Pt    0.2606    0.2043    0.0957
Pt    0.2615    0.2404    0.0188
Pt    0.2613    0.2402    0.0570
Pt    0.2605    0.2399    0.0937
Pt    0.2976    0.1275    0.0201
Pt    0.2976    0.1273    0.0569
Pt    0.2992    0.1281    0.0922
Pt    0.2991    0.1655    0.0199
Pt    0.2985    0.1656    0.0573
Pt    0.2976    0.1677    0.0937
Pt    0.2988    0.2032    0.0204
Pt    0.2977    0.2039    0.0574
Pt    0.2975    0.2013    0.0958
Pt    0.2979    0.2401    0.0200
Pt    0.2965    0.2386    0.0584
Pt    0.2985    0.2408    0.0946
Pt    0.3366    0.1291    0.0198
Pt    0.3365    0.1645    0.0208
Pt    0.3347    0.1649    0.0572
Pt    0.3347    0.2028    0.0196
Pt    0.3351    0.2042    0.0568
Pt    0.3365    0.2026    0.0953
Pt    0.3352    0.2411    0.0207
Pt    0.3345    0.2410    0.0568
Pt    0.3349    0.2406    0.0949
Pt    0.3715    0.1636    0.0192
Pt    0.3715    0.1651    0.0575
Pt    0.3715    0.2034    0.0195
Pt    0.3720    0.2034    0.0582
Pt    0.3727    0.2414    0.0202
Pt    0.3735    0.2427    0.0597
Pt    0.3719    0.2400    0.0932
Pt    0.4069    0.1661    0.0564
Pt    0.4076    0.1680    0.0948
Pt    0.4073    0.2024    0.0201
Pt    0.4068    0.2021    0.0558
Pt    0.4077    0.2047    0.0953
Pt    0.4432    0.0926    0.0926
Pt    0.4427    0.1304    0.0566
Pt    0.4429    0.1311    0.0933
Pt    0.4429    0.1670    0.0193
Pt    0.4442    0.1662    0.0551
Pt    0.4438    0.1679    0.0934
Pt    0.4428    0.2043    0.0186
Pt    0.4440    0.2072    0.0555
Pt    0.4443    0.2042    0.0929
Pt    0.4437    0.2403    0.0549
Pt    0.4815    0.0196    0.0202
Pt    0.4810    0.0182    0.0579
Pt    0.4803    0.0218    0.0938
Pt    0.4802    0.0574    0.0193
Pt    0.4810    0.0567    0.0556
Pt    0.4794    0.0573    0.0927
Pt    0.4826    0.0934    0.0194
Pt    0.4815    0.0934    0.0552
Pt    0.4800    0.0937    0.0932
Pt    0.4813    0.1300    0.0194
Pt    0.4801    0.1312    0.0552
Pt    0.4802    0.1302    0.0946
Pt    0.4801    0.1689    0.0189
Pt    0.4800    0.1664    0.0545
Pt    0.4821    0.1676    0.0929
Pt    0.4791    0.2045    0.0169
Pt    0.4797    0.2055    0.0549
Pt    0.4806    0.2063    0.0925
Pt    0.4819    0.2440    0.0536
Pt    0.4796    0.2444    0.0924
Pt    0.2782    0.1110    0.0186
Pt    0.2805    0.1110    0.0946
Pt    0.2794    0.1469    0.0199
Pt    0.2790    0.1463    0.0580
Pt    0.2802    0.1491    0.0941
Pt    0.2783    0.1836    0.0187
Pt    0.2798    0.1859    0.0573
Pt    0.2784    0.1844    0.0944
Pt    0.2781    0.2210    0.0199
Pt    0.2786    0.2213    0.0575
Pt    0.2794    0.2230    0.0953
Pt    0.3165    0.1465    0.0209
Pt    0.3159    0.1449    0.0574
Pt    0.3159    0.1493    0.0937
Pt    0.3173    0.1837    0.0199
Pt    0.3168    0.1840    0.0569
Pt    0.3168    0.1845    0.0942
Pt    0.3172    0.2221    0.0190
Pt    0.3164    0.2225    0.0571
Pt    0.3171    0.2203    0.0948
Pt    0.3335    0.0043    0.0027
Pt    0.3546    0.1460    0.0198
Pt    0.3542    0.1834    0.0205
Pt    0.3532    0.1837    0.0577
Pt    0.3539    0.1840    0.0936
Pt    0.3537    0.2222    0.0196
Pt    0.3544    0.2231    0.0564
Pt    0.3535    0.2215    0.0945
Pt    0.3893    0.1828    0.0197
Pt    0.3896    0.1838    0.0583
Pt    0.3893    0.2218    0.0195
Pt    0.3912    0.2235    0.0582
Pt    0.3904    0.2236    0.0952
Pt    0.4231    0.1474    0.0567
Pt    0.4249    0.1496    0.0944
Pt    0.4264    0.1850    0.0201
Pt    0.4259    0.1846    0.0548
Pt    0.4255    0.1855    0.0945
Pt    0.4245    0.2216    0.0197
Pt    0.4236    0.2232    0.0571
Pt    0.4255    0.2229    0.0942
Pt    0.4987    0.0747    0.0929
Pt    0.4627    0.0385    0.0200
Pt    0.4623    0.0393    0.0551
Pt    0.4627    0.0749    0.0552
Pt    0.4612    0.0753    0.0934
Pt    0.4608    0.1115    0.0563
Pt    0.4606    0.1116    0.0927
Pt    0.4612    0.1494    0.0173
Pt    0.4608    0.1475    0.0554
Pt    0.4623    0.1494    0.0937
Pt    0.4606    0.1862    0.0169
Pt    0.4618    0.1869    0.0555
Pt    0.4631    0.1864    0.0924
Pt    0.4631    0.2247    0.0546
Pt    0.4616    0.2242    0.0931
Pt    0.2797    0.0201    0.1106
Pt    0.2809    0.0943    0.1129
Pt    0.5002    0.1295    0.0360
Pt    0.2789    0.1287    0.0376
Pt    0.2798    0.1280    0.0745
Pt    0.2815    0.1312    0.1122
Pt    0.4992    0.2062    0.0735
Pt    0.2792    0.1662    0.0386
Pt    0.2788    0.1660    0.0758
Pt    0.2786    0.1671    0.1123
Pt    0.4990    0.0195    0.0391
Pt    0.2799    0.2028    0.0375
Pt    0.2780    0.2032    0.0764
Pt    0.2791    0.2027    0.1133
Pt    0.3505    0.0018    0.0213
Pt    0.2795    0.2409    0.0375
Pt    0.2787    0.2403    0.0766
Pt    0.2785    0.2410    0.1142
Pt    0.4990    0.2235    0.0175
Pt    0.3151    0.1273    0.0379
Pt    0.3140    0.1316    0.1123
Pt    0.4981    0.2430    0.1126
Pt    0.3173    0.1652    0.0393
Pt    0.3169    0.1657    0.0750
Pt    0.4997    0.0927    0.0378
Pt    0.3177    0.2029    0.0389
Pt    0.3167    0.2031    0.0752
Pt    0.3176    0.2025    0.1125
Pt    0.4996    0.0165    0.0771
Pt    0.3161    0.2417    0.0388
Pt    0.3167    0.2403    0.0773
Pt    0.3175    0.2409    0.1128
Pt    0.4994    0.1500    0.0187
Pt    0.4987    0.1666    0.0735
Pt    0.3540    0.1640    0.0395
Pt    0.3524    0.1661    0.0764
Pt    0.3355    0.2225    0.0013
Pt    0.3532    0.2032    0.0384
Pt    0.3529    0.2027    0.0758
Pt    0.4991    0.1133    0.0939
Pt    0.3533    0.2412    0.0394
Pt    0.3537    0.2411    0.0757
Pt    0.3564    0.2392    0.1113
Pt    0.3888    0.1651    0.0376
Pt    0.3908    0.1663    0.0766
Pt    0.5002    0.1117    0.0177
Pt    0.3898    0.2048    0.0383
Pt    0.3902    0.2050    0.0763
Pt    0.3906    0.2422    0.0407
Pt    0.4245    0.1643    0.0380
Pt    0.4242    0.1666    0.0755
Pt    0.4265    0.1671    0.1139
Pt    0.4252    0.2058    0.0383
Pt    0.4257    0.2057    0.0757
Pt    0.4256    0.2040    0.1117
Pt    0.4243    0.2413    0.0391
Pt    0.3720    0.2029    0.0939
Pt    0.4625    0.0199    0.0370
Pt    0.4620    0.0568    0.0386
Pt    0.4609    0.0565    0.0735
Pt    0.4607    0.0578    0.1116
Pt    0.4614    0.0925    0.0733
Pt    0.4609    0.0936    0.1107
Pt    0.4628    0.1296    0.0360
Pt    0.4598    0.1298    0.0748
Pt    0.4629    0.1311    0.1139
Pt    0.4621    0.1667    0.0357
Pt    0.4626    0.1688    0.0747
Pt    0.4618    0.1676    0.1131
Pt    0.4623    0.2061    0.0360
Pt    0.4612    0.2068    0.0739
Pt    0.4633    0.2046    0.1113
Pt    0.4615    0.2431    0.0738
Pt    0.4973    0.2055    0.0353
Pt    0.4984    0.0938    0.1113
Pt    0.4988    0.1877    0.0170
Pt    0.4994    0.1126    0.0570
Pt    0.4996    0.2429    0.0361
Pt    0.4980    0.1865    0.0546
Pt    0.5003    0.0747    0.0569
Pt    0.5001    0.0560    0.0381
Pt    0.4995    0.1691    0.1104
Pt    0.4987    0.1304    0.0750
Pt    0.4991    0.1479    0.0933
Pt    0.2988    0.1100    0.0012
Pt    0.4990    0.2436    0.0733
Pt    0.2618    0.0026    0.1107
Pt    0.4998    0.0369    0.0947
Pt    0.3177    0.1645    0.0021
Pt    0.3721    0.2224    0.0016
Pt    0.2974    0.2211    0.0015
Pt    0.3165    0.2415    0.0014
Pt    0.2952    0.0027    0.0028
Pt    0.5007    0.0206    0.0018
Pt    0.2981    0.1845    0.0014
Pt    0.3172    0.2028    0.0016
Pt    0.4990    0.0168    0.1879
Pt    0.2794    0.0011    0.2045
Pt    0.4995    0.0372    0.1312
Pt    0.2606    0.0391    0.1468
Pt    0.2620    0.0399    0.1849
Pt    0.2616    0.0380    0.2230
Pt    0.2619    0.0766    0.1498
Pt    0.2619    0.0753    0.1865
Pt    0.2607    0.0755    0.2234
Pt    0.2632    0.1122    0.1507
Pt    0.2607    0.1153    0.1874
Pt    0.2614    0.1134    0.2226
Pt    0.2620    0.1491    0.1490
Pt    0.4984    0.2434    0.1480
Pt    0.4997    0.1848    0.2429
Pt    0.4986    0.0184    0.1498
Pt    0.3001    0.0388    0.1468
Pt    0.2962    0.0369    0.1858
Pt    0.2977    0.0387    0.2227
Pt    0.2994    0.0755    0.1487
Pt    0.2987    0.0765    0.1871
Pt    0.2974    0.0768    0.2249
Pt    0.2991    0.1134    0.1497
Pt    0.2995    0.1143    0.1855
Pt    0.2988    0.1132    0.2233
Pt    0.2976    0.1507    0.1494
Pt    0.5001    0.0943    0.1876
Pt    0.5009    0.1681    0.1494
Pt    0.4996    0.1112    0.2070
Pt    0.3339    0.0395    0.1484
Pt    0.3352    0.0391    0.1848
Pt    0.3353    0.0384    0.2245
Pt    0.3352    0.0775    0.1875
Pt    0.3351    0.0762    0.2238
Pt    0.3350    0.1141    0.2270
Pt    0.4993    0.0559    0.1506
Pt    0.4991    0.1121    0.1687
Pt    0.3722    0.0392    0.1849
Pt    0.3727    0.0395    0.2235
Pt    0.3701    0.0775    0.1858
Pt    0.3719    0.0756    0.2250
Pt    0.4069    0.0393    0.1855
Pt    0.4078    0.0395    0.2239
Pt    0.4064    0.0777    0.1869
Pt    0.4081    0.0779    0.2227
Pt    0.4429    0.0378    0.1492
Pt    0.4440    0.0377    0.1861
Pt    0.4453    0.0373    0.2235
Pt    0.4443    0.0749    0.1493
Pt    0.4437    0.0745    0.1865
Pt    0.4442    0.0764    0.2226
Pt    0.4423    0.1120    0.1482
Pt    0.4438    0.1123    0.1856
Pt    0.4444    0.1139    0.2239
Pt    0.4417    0.1484    0.1494
Pt    0.4993    0.1851    0.2058
Pt    0.4806    0.0382    0.1486
Pt    0.4814    0.0361    0.1886
Pt    0.4792    0.0364    0.2245
Pt    0.4815    0.0753    0.1492
Pt    0.4799    0.0748    0.1873
Pt    0.4801    0.0762    0.2249
Pt    0.4813    0.1119    0.1504
Pt    0.4814    0.1124    0.1873
Pt    0.4812    0.1118    0.2254
Pt    0.4815    0.1483    0.1494
Pt    0.4814    0.1505    0.1865
Pt    0.4817    0.1506    0.2245
Pt    0.4818    0.1875    0.1512
Pt    0.4801    0.1868    0.1873
Pt    0.4818    0.1857    0.2240
Pt    0.4777    0.2242    0.1502
Pt    0.4802    0.2233    0.1862
Pt    0.4821    0.2225    0.2240
Pt    0.2614    0.0199    0.1299
Pt    0.2611    0.0201    0.1674
Pt    0.2608    0.0207    0.2041
Pt    0.2607    0.0202    0.2423
Pt    0.2618    0.0570    0.1287
Pt    0.2601    0.0574    0.1663
Pt    0.2611    0.0583    0.2047
Pt    0.2610    0.0578    0.2425
Pt    0.2617    0.0947    0.1314
Pt    0.2612    0.0952    0.1694
Pt    0.2608    0.0952    0.2040
Pt    0.2615    0.0942    0.2418
Pt    0.2635    0.1296    0.1313
Pt    0.2599    0.1307    0.1674
Pt    0.2622    0.1329    0.2053
Pt    0.2615    0.1317    0.2410
Pt    0.2598    0.1691    0.1318
Pt    0.2605    0.2039    0.1327
Pt    0.2587    0.2398    0.1328
Pt    0.3003    0.0212    0.1270
Pt    0.2978    0.0201    0.1670
Pt    0.2975    0.0197    0.2033
Pt    0.2969    0.0192    0.2434
Pt    0.2981    0.0571    0.1287
Pt    0.2982    0.0580    0.1674
Pt    0.2994    0.0567    0.2040
Pt    0.2978    0.0570    0.2421
Pt    0.3006    0.0939    0.1297
Pt    0.2987    0.0940    0.1674
Pt    0.2986    0.0943    0.2047
Pt    0.2987    0.0944    0.2426
Pt    0.2991    0.1319    0.1318
Pt    0.2998    0.1308    0.2051
Pt    0.2976    0.1326    0.2420
Pt    0.2970    0.2039    0.1311
Pt    0.2977    0.2406    0.1313
Pt    0.3348    0.0202    0.1310
Pt    0.3337    0.0197    0.1664
Pt    0.3362    0.0202    0.2036
Pt    0.3333    0.0190    0.2428
Pt    0.3357    0.0587    0.1660
Pt    0.3352    0.0582    0.2044
Pt    0.3346    0.0564    0.2422
Pt    0.3347    0.0951    0.2069
Pt    0.3346    0.0945    0.2439
Pt    0.3352    0.2402    0.2415
Pt    0.3720    0.0206    0.1646
Pt    0.3733    0.0197    0.2046
Pt    0.3718    0.0182    0.2420
Pt    0.3706    0.0573    0.1665
Pt    0.3728    0.0577    0.2054
Pt    0.3725    0.0563    0.2427
Pt    0.3736    0.0932    0.2423
Pt    0.3714    0.2408    0.2420
Pt    0.4085    0.0201    0.2054
Pt    0.4075    0.0580    0.1663
Pt    0.4076    0.0593    0.2042
Pt    0.4053    0.0945    0.1676
Pt    0.4079    0.0964    0.2051
Pt    0.4441    0.0189    0.1679
Pt    0.4433    0.0194    0.2043
Pt    0.4442    0.0573    0.1306
Pt    0.4444    0.0557    0.1688
Pt    0.4435    0.0566    0.2052
Pt    0.4443    0.0582    0.2422
Pt    0.4427    0.0922    0.1293
Pt    0.4438    0.0937    0.1681
Pt    0.4451    0.0945    0.2051
Pt    0.4427    0.1310    0.1299
Pt    0.4445    0.1309    0.1684
Pt    0.4455    0.1317    0.2076
Pt    0.4436    0.1679    0.1318
Pt    0.4451    0.1679    0.1676
Pt    0.4445    0.2030    0.1297
Pt    0.4447    0.2397    0.2417
Pt    0.4811    0.0192    0.1315
Pt    0.4812    0.0172    0.1705
Pt    0.4809    0.0167    0.2077
Pt    0.4801    0.0560    0.1301
Pt    0.4797    0.0559    0.1676
Pt    0.4811    0.0567    0.2055
Pt    0.4781    0.0557    0.2444
Pt    0.4800    0.0933    0.1302
Pt    0.4825    0.0927    0.1682
Pt    0.4810    0.0941    0.2055
Pt    0.4795    0.0951    0.2449
Pt    0.4811    0.1310    0.1322
Pt    0.4808    0.1300    0.1685
Pt    0.4811    0.1314    0.2063
Pt    0.4815    0.1302    0.2423
Pt    0.4803    0.1668    0.1312
Pt    0.4806    0.1686    0.1683
Pt    0.4800    0.1677    0.2051
Pt    0.4807    0.2057    0.1313
Pt    0.4805    0.2058    0.1673
Pt    0.4809    0.2045    0.2058
Pt    0.4810    0.2040    0.2422
Pt    0.4795    0.2439    0.1317
Pt    0.4825    0.2414    0.2038
Pt    0.4838    0.2415    0.2410
Pt    0.5002    0.1307    0.1868
Pt    0.5011    0.2224    0.2418
Pt    0.4989    0.0751    0.1315
Pt    0.5006    0.1511    0.1298
Pt    0.4997    0.1493    0.2063
Pt    0.2800    0.0391    0.1650
Pt    0.2787    0.0399    0.2035
Pt    0.2793    0.0377    0.2423
Pt    0.2799    0.0762    0.1295
Pt    0.2804    0.0764    0.1676
Pt    0.2807    0.0761    0.2050
Pt    0.2797    0.0762    0.2438
Pt    0.2821    0.1123    0.1303
Pt    0.2799    0.1143    0.1699
Pt    0.2796    0.1124    0.2049
Pt    0.2808    0.1142    0.2422
Pt    0.2792    0.1498    0.1313
Pt    0.2801    0.1476    0.1679
Pt    0.2790    0.1852    0.1316
Pt    0.2789    0.2220    0.1315
Pt    0.2809    0.0397    0.1289
Pt    0.4973    0.0382    0.2411
Pt    0.3381    0.0011    0.1470
Pt    0.5003    0.1124    0.1312
Pt    0.3184    0.0392    0.1291
Pt    0.3152    0.0397    0.1668
Pt    0.3183    0.0393    0.2045
Pt    0.3162    0.0372    0.2410
Pt    0.3168    0.0768    0.1684
Pt    0.3166    0.0762    0.2069
Pt    0.3170    0.0759    0.2416
Pt    0.3162    0.1124    0.1304
Pt    0.3176    0.1133    0.2067
Pt    0.3160    0.1143    0.2440
Pt    0.3170    0.2235    0.1296
Pt    0.5008    0.2035    0.2243
Pt    0.4997    0.1112    0.2438
Pt    0.4978    0.1876    0.1306
Pt    0.3527    0.0389    0.1659
Pt    0.3547    0.0394    0.2046
Pt    0.3533    0.0368    0.2427
Pt    0.3533    0.0772    0.1684
Pt    0.3537    0.0774    0.2050
Pt    0.3534    0.0758    0.2431
Pt    0.3541    0.1116    0.2426
Pt    0.5008    0.1312    0.1494
Pt    0.5003    0.0926    0.1505
Pt    0.3898    0.0393    0.1663
Pt    0.3900    0.0389    0.2041
Pt    0.3905    0.0387    0.2423
Pt    0.3880    0.0767    0.1677
Pt    0.3895    0.0786    0.2051
Pt    0.4248    0.0383    0.1674
Pt    0.4259    0.0380    0.2050
Pt    0.4279    0.0393    0.2411
Pt    0.4245    0.0754    0.1682
Pt    0.4256    0.0768    0.2043
Pt    0.4246    0.1136    0.1669
Pt    0.4272    0.1125    0.2041
Pt    0.4611    0.0369    0.1312
Pt    0.4621    0.0364    0.1686
Pt    0.4621    0.0370    0.2048
Pt    0.4626    0.0750    0.1305
Pt    0.4620    0.0759    0.1678
Pt    0.4621    0.0763    0.2058
Pt    0.4617    0.0765    0.2435
Pt    0.4611    0.1125    0.1312
Pt    0.4620    0.1128    0.1676
Pt    0.4634    0.1123    0.2048
Pt    0.4614    0.1495    0.1308
Pt    0.4622    0.1496    0.1676
Pt    0.4623    0.1499    0.2058
Pt    0.4621    0.1861    0.1317
Pt    0.4608    0.1876    0.1702
Pt    0.4630    0.1867    0.2056
Pt    0.4614    0.2238    0.1298
Pt    0.4636    0.2241    0.2060
Pt    0.4619    0.2222    0.2419
Pt    0.2801    0.0209    0.1476
Pt    0.2784    0.0194    0.1851
Pt    0.2797    0.0200    0.2224
Pt    0.2791    0.0579    0.1475
Pt    0.2807    0.0569    0.1858
Pt    0.2789    0.0576    0.2235
Pt    0.2817    0.0942    0.1487
Pt    0.2799    0.0944    0.1860
Pt    0.2793    0.0956    0.2238
Pt    0.2812    0.1308    0.1509
Pt    0.2808    0.1326    0.1882
Pt    0.2807    0.1314    0.2231
Pt    0.2788    0.1674    0.1500
Pt    0.3155    0.0203    0.1476
Pt    0.3168    0.0205    0.1856
Pt    0.3174    0.0200    0.2215
Pt    0.3169    0.0593    0.1477
Pt    0.3167    0.0569    0.1849
Pt    0.3160    0.0567    0.2236
Pt    0.3169    0.0956    0.1514
Pt    0.3191    0.0970    0.1870
Pt    0.3172    0.0947    0.2243
Pt    0.3176    0.1317    0.2244
Pt    0.3531    0.0216    0.1477
Pt    0.3539    0.0219    0.1843
Pt    0.3544    0.0207    0.2227
Pt    0.3533    0.0579    0.1865
Pt    0.3542    0.0581    0.2242
Pt    0.3523    0.0964    0.1859
Pt    0.3542    0.0951    0.2242
Pt    0.3515    0.1135    0.2078
Pt    0.3897    0.0209    0.1842
Pt    0.3909    0.0203    0.2248
Pt    0.3883    0.0581    0.1855
Pt    0.3918    0.0584    0.2253
Pt    0.3717    0.0963    0.2042
Pt    0.4252    0.0208    0.1851
Pt    0.4268    0.0208    0.2236
Pt    0.4267    0.0579    0.1498
Pt    0.4252    0.0569    0.1862
Pt    0.4263    0.0580    0.2236
Pt    0.4260    0.0930    0.1500
Pt    0.4241    0.0952    0.1851
Pt    0.4282    0.0956    0.2238
Pt    0.4628    0.0192    0.1508
Pt    0.4631    0.0164    0.1883
Pt    0.4619    0.0565    0.1489
Pt    0.4615    0.0559    0.1868
Pt    0.4621    0.0561    0.2235
Pt    0.4615    0.0938    0.1491
Pt    0.4619    0.0944    0.1853
Pt    0.4610    0.0956    0.2263
Pt    0.4612    0.1314    0.1493
Pt    0.4618    0.1322    0.1877
Pt    0.4645    0.1310    0.2253
Pt    0.4625    0.1671    0.1499
Pt    0.4615    0.1679    0.1864
Pt    0.4612    0.2042    0.1495
Pt    0.4628    0.2056    0.1878
Pt    0.4629    0.2056    0.2243
Pt    0.4639    0.2413    0.2240
Pt    0.4986    0.2041    0.1855
Pt    0.4996    0.1300    0.2248
Pt    0.4990    0.0926    0.2259
Pt    0.3725    0.0018    0.2234
Pt    0.4994    0.2067    0.1491
Pt    0.4999    0.2435    0.1860
Pt    0.4996    0.1686    0.1873
Pt    0.4993    0.0738    0.1698
Pt    0.5002    0.1852    0.1688
Pt    0.4974    0.2254    0.1680
Pt    0.3908    0.0023    0.2051
Pt    0.4999    0.1684    0.2233
Pt    0.2975    0.0011    0.1472
Pt    0.4996    0.2223    0.2050
Pt    0.4996    0.0755    0.2067
Pt    0.2799    0.0017    0.2422
Pt    0.4993    0.1493    0.1673
Pt    0.4983    0.0368    0.1692
Pt    0.2601    0.0019    0.2232
Pt    0.4991    0.0180    0.2269
Pt    0.3527    0.0012    0.2429
Pt    0.4986    0.0359    0.2067
Pt    0.2797    0.0023    0.1290
Pt    0.3171    0.0022    0.2037
Pt    0.4976    0.0728    0.2439
Pt    0.2984    0.0012    0.1848
Pt    0.4980    0.0559    0.2230
Pt    0.4973    0.2235    0.1302
Pt    0.3530    0.0022    0.1667
Pt    0.3546    0.0015    0.2034
Pt    0.3352    0.0020    0.1845
Pt    0.4996    0.0557    0.1876
Pt    0.2991    0.0019    0.2224
Pt    0.3730    0.0024    0.1844
Pt    0.3359    0.0014    0.2230
Pt    0.2610    0.0013    0.1861
Pt    0.4810    0.0014    0.1501
Pt    0.5004    0.0169    0.3705
Pt    0.4982    0.0938    0.2612
Pt    0.2601    0.0764    0.3728
Pt    0.2600    0.0025    0.3750
Pt    0.2609    0.0389    0.2602
Pt    0.2605    0.0381    0.2977
Pt    0.2625    0.0394    0.3363
Pt    0.2620    0.0394    0.3736
Pt    0.2593    0.0766    0.2609
Pt    0.2612    0.0748    0.2975
Pt    0.2618    0.0760    0.3355
Pt    0.2603    0.0017    0.2994
Pt    0.2596    0.1129    0.2605
Pt    0.2611    0.1146    0.2995
Pt    0.2627    0.1130    0.3357
Pt    0.2611    0.1485    0.2995
Pt    0.2610    0.1831    0.2984
Pt    0.2585    0.2207    0.3336
Pt    0.2593    0.2211    0.3717
Pt    0.4993    0.0738    0.2799
Pt    0.3715    0.0011    0.2602
Pt    0.3916    0.2395    0.2968
Pt    0.5001    0.0352    0.3526
Pt    0.2974    0.0392    0.2600
Pt    0.2988    0.0382    0.2973
Pt    0.2989    0.0379    0.3363
Pt    0.2984    0.0384    0.3735
Pt    0.2980    0.0762    0.2616
Pt    0.2989    0.0772    0.2988
Pt    0.3002    0.0759    0.3358
Pt    0.2984    0.0755    0.3715
Pt    0.2971    0.1139    0.2615
Pt    0.2974    0.1142    0.2975
Pt    0.2986    0.1134    0.3365
Pt    0.2974    0.1490    0.2611
Pt    0.2984    0.1492    0.2971
Pt    0.2977    0.1490    0.3357
Pt    0.2993    0.1865    0.2616
Pt    0.2975    0.1840    0.2963
Pt    0.2973    0.1852    0.3355
Pt    0.2980    0.1857    0.3719
Pt    0.2968    0.2215    0.2971
Pt    0.2966    0.2212    0.3325
Pt    0.2959    0.2206    0.3724
Pt    0.3891    0.2388    0.2597
Pt    0.4994    0.1301    0.2602
Pt    0.4672    0.2410    0.3718
Pt    0.4658    0.2382    0.3356
Pt    0.3342    0.0376    0.2607
Pt    0.3354    0.0377    0.2973
Pt    0.3356    0.0378    0.3363
Pt    0.3349    0.0362    0.3738
Pt    0.3355    0.0757    0.2615
Pt    0.3377    0.0748    0.2987
Pt    0.3372    0.0744    0.3353
Pt    0.3374    0.1156    0.2609
Pt    0.3379    0.1122    0.2980
Pt    0.3359    0.1496    0.2980
Pt    0.3348    0.1501    0.3344
Pt    0.3357    0.1846    0.2955
Pt    0.3349    0.1845    0.3358
Pt    0.3348    0.1841    0.3730
Pt    0.3350    0.2212    0.2591
Pt    0.3347    0.2197    0.2956
Pt    0.3348    0.2226    0.3346
Pt    0.3344    0.2208    0.3704
Pt    0.3903    0.2008    0.3723
Pt    0.4668    0.2404    0.2985
Pt    0.4638    0.2406    0.2606
Pt    0.4669    0.2041    0.3725
Pt    0.3724    0.0383    0.2610
Pt    0.3720    0.0381    0.2996
Pt    0.3738    0.0356    0.3330
Pt    0.3742    0.0382    0.3713
Pt    0.3735    0.0759    0.2612
Pt    0.3722    0.0752    0.2961
Pt    0.3734    0.0707    0.3688
Pt    0.3723    0.1860    0.2973
Pt    0.3715    0.1860    0.3332
Pt    0.3717    0.2200    0.2579
Pt    0.3729    0.2211    0.2966
Pt    0.3721    0.2207    0.3336
Pt    0.3730    0.2204    0.3724
Pt    0.4648    0.2023    0.2956
Pt    0.4090    0.0371    0.3712
Pt    0.4097    0.2209    0.2973
Pt    0.4090    0.2209    0.3352
Pt    0.4092    0.2214    0.3710
Pt    0.4633    0.2028    0.2610
Pt    0.4456    0.0378    0.3709
Pt    0.4450    0.2220    0.2605
Pt    0.4468    0.2213    0.2977
Pt    0.4471    0.2212    0.3349
Pt    0.4480    0.2224    0.3708
Pt    0.3901    0.2386    0.3718
Pt    0.4822    0.0356    0.3709
Pt    0.4812    0.0737    0.2624
Pt    0.4821    0.2213    0.2604
Pt    0.4829    0.2215    0.2982
Pt    0.4857    0.2210    0.3726
Pt    0.2606    0.0194    0.2795
Pt    0.2618    0.0207    0.3181
Pt    0.2612    0.0207    0.3547
Pt    0.2604    0.0562    0.2788
Pt    0.2627    0.0570    0.3174
Pt    0.2599    0.0581    0.3550
Pt    0.2608    0.0958    0.2796
Pt    0.2613    0.0935    0.3165
Pt    0.2603    0.0953    0.3530
Pt    0.2607    0.1312    0.2796
Pt    0.2589    0.1333    0.3209
Pt    0.2606    0.2016    0.3167
Pt    0.2599    0.2386    0.3157
Pt    0.2589    0.2389    0.3533
Pt    0.2977    0.0204    0.2805
Pt    0.2981    0.0193    0.3171
Pt    0.2985    0.0187    0.3563
Pt    0.2978    0.0584    0.2807
Pt    0.3003    0.0569    0.3168
Pt    0.2996    0.0567    0.3561
Pt    0.2984    0.0949    0.2815
Pt    0.2999    0.0959    0.3173
Pt    0.2995    0.0947    0.3536
Pt    0.2977    0.1319    0.2799
Pt    0.2989    0.1306    0.3161
Pt    0.2983    0.1664    0.2776
Pt    0.2971    0.1669    0.3159
Pt    0.2979    0.1681    0.3532
Pt    0.2975    0.2035    0.2796
Pt    0.2958    0.2026    0.3159
Pt    0.2978    0.2039    0.3528
Pt    0.2965    0.2379    0.2774
Pt    0.2978    0.2394    0.3157
Pt    0.2957    0.2396    0.3535
Pt    0.3351    0.0186    0.2811
Pt    0.3352    0.0181    0.3163
Pt    0.3347    0.0183    0.3547
Pt    0.3364    0.0575    0.2786
Pt    0.3357    0.0563    0.3170
Pt    0.3353    0.0563    0.3559
Pt    0.3387    0.0948    0.2797
Pt    0.3368    0.0933    0.3179
Pt    0.3363    0.1314    0.2794
Pt    0.3365    0.1321    0.3157
Pt    0.3353    0.1684    0.2773
Pt    0.3358    0.1674    0.3158
Pt    0.3349    0.1661    0.3550
Pt    0.3352    0.2024    0.2767
Pt    0.3349    0.2022    0.3153
Pt    0.3344    0.2028    0.3542
Pt    0.3368    0.2386    0.2775
Pt    0.3344    0.2406    0.3140
Pt    0.3350    0.2405    0.3533
Pt    0.3728    0.0203    0.2804
Pt    0.3745    0.0175    0.3153
Pt    0.3724    0.0191    0.3527
Pt    0.3725    0.0554    0.2791
Pt    0.3729    0.0538    0.3505
Pt    0.3714    0.0933    0.2808
Pt    0.3725    0.2032    0.2780
Pt    0.3750    0.2023    0.3144
Pt    0.3723    0.2011    0.3543
Pt    0.3726    0.2397    0.2778
Pt    0.3730    0.2407    0.3155
Pt    0.3722    0.2399    0.3536
Pt    0.4094    0.0183    0.3525
Pt    0.4094    0.2027    0.3178
Pt    0.4092    0.2018    0.3542
Pt    0.4097    0.2404    0.2792
Pt    0.4095    0.2398    0.3163
Pt    0.4098    0.2405    0.3536
Pt    0.4461    0.2037    0.2792
Pt    0.4484    0.2038    0.3534
Pt    0.4471    0.2396    0.2798
Pt    0.4480    0.2397    0.3168
Pt    0.4481    0.2408    0.3533
Pt    0.4839    0.2041    0.2781
Pt    0.4826    0.2411    0.2798
Pt    0.4843    0.2371    0.3190
Pt    0.4865    0.2394    0.3528
Pt    0.4653    0.0560    0.3716
Pt    0.4634    0.0177    0.3686
Pt    0.4286    0.2390    0.3720
Pt    0.2787    0.0379    0.2801
Pt    0.2812    0.0389    0.3186
Pt    0.2801    0.0387    0.3543
Pt    0.2786    0.0760    0.2796
Pt    0.2819    0.0771    0.3176
Pt    0.2796    0.0757    0.3542
Pt    0.2789    0.1129    0.2798
Pt    0.2798    0.1125    0.3161
Pt    0.2779    0.1505    0.2779
Pt    0.2789    0.1504    0.3171
Pt    0.2795    0.1837    0.2783
Pt    0.2789    0.1834    0.3158
Pt    0.2791    0.1855    0.3547
Pt    0.2771    0.2210    0.3146
Pt    0.2771    0.2209    0.3522
Pt    0.4289    0.2381    0.3353
Pt    0.4284    0.2394    0.2977
Pt    0.4257    0.2391    0.2595
Pt    0.3176    0.0391    0.2799
Pt    0.3179    0.0378    0.3177
Pt    0.3163    0.0375    0.3562
Pt    0.3174    0.0757    0.2803
Pt    0.3181    0.0757    0.3185
Pt    0.3173    0.0761    0.3553
Pt    0.3179    0.1139    0.2790
Pt    0.3199    0.1133    0.3170
Pt    0.3181    0.1498    0.2790
Pt    0.3165    0.1496    0.3169
Pt    0.3168    0.1851    0.2778
Pt    0.3151    0.1849    0.3164
Pt    0.3165    0.1840    0.3548
Pt    0.3161    0.2223    0.2783
Pt    0.3155    0.2207    0.3147
Pt    0.3162    0.2213    0.3528
Pt    0.4281    0.2024    0.3723
Pt    0.4293    0.2027    0.3361
Pt    0.4300    0.2034    0.2978
Pt    0.3535    0.0383    0.2799
Pt    0.3534    0.0370    0.3158
Pt    0.3529    0.0382    0.3541
Pt    0.3542    0.0745    0.2782
Pt    0.3556    0.0741    0.3169
Pt    0.3546    0.1857    0.2778
Pt    0.3540    0.1855    0.3155
Pt    0.3532    0.1838    0.3538
Pt    0.3545    0.2201    0.2765
Pt    0.3547    0.2202    0.3151
Pt    0.3547    0.2206    0.3537
Pt    0.4279    0.0198    0.3702
Pt    0.3903    0.2397    0.3336
Pt    0.3923    0.0363    0.3520
Pt    0.3907    0.2206    0.2776
Pt    0.3912    0.2214    0.3161
Pt    0.3905    0.2194    0.3529
Pt    0.4265    0.2212    0.2793
Pt    0.4277    0.2212    0.3151
Pt    0.4292    0.2209    0.3538
Pt    0.4646    0.2218    0.2787
Pt    0.4645    0.2191    0.3159
Pt    0.4668    0.2212    0.3536
Pt    0.2787    0.0197    0.2612
Pt    0.2790    0.0198    0.2996
Pt    0.2810    0.0189    0.3368
Pt    0.2797    0.0205    0.3737
Pt    0.2794    0.0571    0.2617
Pt    0.2800    0.0564    0.2986
Pt    0.2800    0.0569    0.3364
Pt    0.2797    0.0583    0.3731
Pt    0.2798    0.0955    0.2611
Pt    0.2793    0.0941    0.2982
Pt    0.2803    0.0953    0.3362
Pt    0.2794    0.0936    0.3716
Pt    0.2780    0.1313    0.2601
Pt    0.2785    0.1319    0.2989
Pt    0.2805    0.1315    0.3338
Pt    0.2784    0.1669    0.2969
Pt    0.2789    0.1682    0.3362
Pt    0.2781    0.2018    0.2964
Pt    0.2773    0.2020    0.3353
Pt    0.2786    0.2034    0.3725
Pt    0.2766    0.2386    0.2951
Pt    0.2779    0.2400    0.3341
Pt    0.2765    0.2396    0.3718
Pt    0.3146    0.0203    0.2616
Pt    0.3174    0.0198    0.2985
Pt    0.3174    0.0184    0.3356
Pt    0.3156    0.0189    0.3755
Pt    0.3173    0.0577    0.2604
Pt    0.3179    0.0576    0.2989
Pt    0.3173    0.0575    0.3362
Pt    0.3161    0.0951    0.2625
Pt    0.3194    0.0953    0.2988
Pt    0.3189    0.0944    0.3358
Pt    0.3165    0.1316    0.2614
Pt    0.3183    0.1313    0.2982
Pt    0.3164    0.1327    0.3351
Pt    0.3170    0.1674    0.2981
Pt    0.3155    0.1673    0.3348
Pt    0.3153    0.2048    0.2618
Pt    0.3159    0.2021    0.2974
Pt    0.3157    0.2032    0.3341
Pt    0.3153    0.2033    0.3718
Pt    0.3163    0.2388    0.2584
Pt    0.3161    0.2395    0.2958
Pt    0.3168    0.2398    0.3344
Pt    0.3144    0.2395    0.3713
Pt    0.3533    0.0196    0.2617
Pt    0.3542    0.0182    0.2972
Pt    0.3544    0.0181    0.3334
Pt    0.3533    0.0194    0.3720
Pt    0.3538    0.0560    0.2597
Pt    0.3543    0.0571    0.2977
Pt    0.3544    0.0561    0.3347
Pt    0.3538    0.0558    0.3732
Pt    0.3561    0.0953    0.2613
Pt    0.3557    0.0938    0.3002
Pt    0.3544    0.1678    0.2954
Pt    0.3544    0.1674    0.3341
Pt    0.3537    0.2026    0.2963
Pt    0.3527    0.2032    0.3350
Pt    0.3536    0.2030    0.3721
Pt    0.3538    0.2396    0.2591
Pt    0.3530    0.2379    0.2957
Pt    0.3535    0.2398    0.3338
Pt    0.3522    0.2400    0.3711
Pt    0.3901    0.0204    0.2592
Pt    0.3918    0.0189    0.3340
Pt    0.3904    0.0180    0.3709
Pt    0.3922    0.0560    0.3697
Pt    0.3903    0.2028    0.3343
Pt    0.4100    0.0011    0.3705
Pt    0.2603    0.0728    0.4805
Pt    0.2598    0.2229    0.4449
Pt    0.2607    0.2207    0.4814
Pt    0.2972    0.2204    0.4084
Pt    0.2967    0.2227    0.4456
Pt    0.2967    0.2211    0.4823
Pt    0.3352    0.2206    0.4092
Pt    0.3344    0.2211    0.4479
Pt    0.3872    0.0018    0.4632
Pt    0.5001    0.0766    0.4642
Pt    0.4456    0.0912    0.3888
Pt    0.3738    0.0372    0.4092
Pt    0.3721    0.0372    0.4436
Pt    0.3707    0.0394    0.4821
Pt    0.3714    0.2217    0.4082
Pt    0.3725    0.2212    0.4466
Pt    0.3710    0.2201    0.4861
Pt    0.2626    0.0924    0.4984
Pt    0.4996    0.0752    0.3889
Pt    0.3705    0.0576    0.5002
Pt    0.4107    0.0384    0.4076
Pt    0.4083    0.0387    0.4446
Pt    0.4076    0.0391    0.4823
Pt    0.4089    0.0761    0.4449
Pt    0.4083    0.0774    0.4806
Pt    0.4081    0.1133    0.4816
Pt    0.4100    0.1839    0.4088
Pt    0.4084    0.1852    0.4477
Pt    0.4110    0.1862    0.4826
Pt    0.4090    0.2207    0.4087
Pt    0.4084    0.2228    0.4460
Pt    0.4091    0.2220    0.4854
Pt    0.3685    0.0014    0.4815
Pt    0.5010    0.0575    0.4460
Pt    0.3525    0.0392    0.4997
Pt    0.4456    0.0389    0.4088
Pt    0.4451    0.0384    0.4453
Pt    0.4442    0.0386    0.4837
Pt    0.4468    0.0761    0.4074
Pt    0.4460    0.0768    0.4444
Pt    0.4446    0.0767    0.4816
Pt    0.4456    0.1129    0.4444
Pt    0.4453    0.1138    0.4839
Pt    0.4455    0.1497    0.4453
Pt    0.4450    0.1514    0.4829
Pt    0.4459    0.1840    0.4073
Pt    0.4474    0.1875    0.4480
Pt    0.4462    0.1862    0.4825
Pt    0.4490    0.2216    0.4093
Pt    0.4471    0.2220    0.4479
Pt    0.4468    0.2227    0.4848
Pt    0.4068    0.0957    0.4998
Pt    0.4650    0.1687    0.4454
Pt    0.4665    0.1691    0.4088
Pt    0.4822    0.0377    0.4083
Pt    0.4837    0.0382    0.4454
Pt    0.4838    0.0376    0.4813
Pt    0.4825    0.0741    0.4073
Pt    0.4830    0.0755    0.4442
Pt    0.4823    0.0758    0.4831
Pt    0.4841    0.1138    0.4062
Pt    0.4821    0.1138    0.4448
Pt    0.4816    0.1125    0.4824
Pt    0.4857    0.1522    0.4423
Pt    0.4836    0.1509    0.4845
Pt    0.4846    0.1856    0.4100
Pt    0.4842    0.1850    0.4445
Pt    0.4857    0.2230    0.4078
Pt    0.4859    0.2203    0.4465
Pt    0.4646    0.1316    0.4822
Pt    0.2603    0.2017    0.4626
Pt    0.2592    0.2392    0.3913
Pt    0.2585    0.2400    0.4259
Pt    0.2605    0.2422    0.4652
Pt    0.2984    0.2029    0.4283
Pt    0.2960    0.2034    0.4628
Pt    0.2974    0.2397    0.3914
Pt    0.2966    0.2398    0.4278
Pt    0.2969    0.2395    0.4651
Pt    0.3350    0.0172    0.3904
Pt    0.3357    0.2022    0.3907
Pt    0.3347    0.2046    0.4287
Pt    0.3330    0.2393    0.3906
Pt    0.3346    0.2388    0.4288
Pt    0.3359    0.2401    0.4655
Pt    0.3716    0.0191    0.3893
Pt    0.3715    0.0179    0.4276
Pt    0.3697    0.0219    0.4639
Pt    0.3736    0.0565    0.3894
Pt    0.3718    0.0549    0.4621
Pt    0.3914    0.0930    0.4425
Pt    0.3721    0.2017    0.3905
Pt    0.3727    0.2031    0.4270
Pt    0.3721    0.2039    0.4648
Pt    0.3714    0.2400    0.3899
Pt    0.3723    0.2409    0.4278
Pt    0.3708    0.2393    0.4663
[truncated: 1,054,584 more chars]
