# Supplementary material
Source: publisher figshare collection journal article supplement (https://rs.figshare.com/ndownloader/files/37464464)
Supplement: Supplementary file 2 [file 37464464 › Ordered_Nanoporous_Metals_SI/ONMs_Crystal_Structures/ONM_from_MOF_PCN6P.cif]

data_block_1
#***********************************************************************************************
#
# On use of this cif file, please acknowledge citation to:
#
# Understanding the stability and structural properties of Ordered Nanoporous Metals towards their rational synthesis
# Jose M. Ortiz-Roldan, Salvador R. G. Balestra, Rocio Bueno-Perez, Sof�a Calero,
# Elena Garcia-Perez, C. Richard A. Catlow, A. Rabdel Ruiz-Salvador, Said Hamad
# Proc. R Soc. A 2022
#
# Contact emails: : said@upo.es, rruisal@upo.es, c.r.a.catlow@ucl.ac.uk
#
#***********************************************************************************************

_audit_creation_date         'Tue March 22 2022'
_audit_creation_method       'generated by GDIS v0.90'


_cell_length_a             46.1131
_cell_length_b             46.1052
_cell_length_c             46.1180
_cell_angle_alpha          90.00
_cell_angle_beta           90.00
_cell_angle_gamma          90.00


_symmetry_space_group_name_H-M   'P 1'
_symmetry_Int_Tables_number       1


loop_
_atom_site_label
_atom_site_fract_x
_atom_site_fract_y
_atom_site_fract_z
Pt    0.1309    0.0062    0.0479
Pt    0.2157    0.0457    0.0878
Pt    0.2155    0.0922    0.0461
Pt    0.1306    0.1732    0.0476
Pt    0.1305    0.1341    0.0905
Pt    0.1301    0.0911    0.0504
Pt    0.0887    0.0067    0.0073
Pt    0.0446    0.1744    0.0505
Pt    0.0493    0.0938    0.0485
Pt    0.0900    0.0886    0.0934
Pt    0.0448    0.0499    0.0912
Pt    0.0876    0.1772    0.0923
Pt    0.0494    0.1336    0.0912
Pt    0.1716    0.1339    0.0457
Pt    0.1711    0.0478    0.0492
Pt    0.1751    0.0921    0.0921
Pt    0.0881    0.2162    0.0478
Pt    0.1322    0.0489    0.0912
Pt    0.0890    0.1344    0.0505
Pt    0.0448    0.2182    0.0904
Pt    0.0882    0.0471    0.0487
Pt    0.0455    0.2536    0.0450
Pt    0.0893    0.1749    0.0066
Pt    0.0460    0.0491    0.0073
Pt    0.0894    0.0897    0.0087
Pt    0.0920    0.2530    0.0914
Pt    0.0063    0.0943    0.0901
Pt    0.1771    0.0447    0.1306
Pt    0.1319    0.2166    0.0098
Pt    0.1288    0.1322    0.0058
Pt    0.1726    0.0060    0.0061
Pt    0.1336    0.0469    0.1738
Pt    0.0548    0.1363    0.1760
Pt    0.0494    0.0503    0.1766
Pt    0.2534    0.2519    0.1730
Pt    0.0886    0.0918    0.1741
Pt    0.0454    0.0938    0.2185
Pt    0.1309    0.0874    0.1314
Pt    0.0468    0.0084    0.2154
Pt    0.0899    0.0466    0.1332
Pt    0.1304    0.0073    0.2147
Pt    0.0905    0.0069    0.1752
Pt    0.0080    0.0936    0.1744
Pt    0.0909    0.0539    0.2175
Pt    0.0470    0.0911    0.1324
Pt    0.0471    0.1771    0.1341
Pt    0.0882    0.1325    0.1329
Pt    0.0058    0.1348    0.2145
Pt    0.0881    0.0075    0.2543
Pt    0.2106    0.2147    0.2553
Pt    0.0448    0.0097    0.1354
Pt    0.0456    0.0511    0.2553
Pt    0.2080    0.2239    0.3410
Pt    0.0915    0.0058    0.3350
Pt    0.2146    0.1381    0.3375
Pt    0.1269    0.2133    0.3395
Pt    0.1734    0.0469    0.3759
Pt    0.0463    0.0481    0.3399
Pt    0.1302    0.0929    0.2938
Pt    0.0906    0.0903    0.3380
Pt    0.0873    0.1738    0.3403
Pt    0.1760    0.0926    0.3359
Pt    0.1704    0.1779    0.3357
Pt    0.1311    0.1334    0.3348
Pt    0.1353    0.0498    0.3353
Pt    0.0428    0.1344    0.3384
Pt    0.0889    0.0501    0.2963
Pt    0.0864    0.0947    0.2581
Pt    0.0871    0.1352    0.2998
Pt    0.0470    0.0084    0.2957
Pt    0.2532    0.2199    0.2996
Pt    0.0921    0.0488    0.3800
Pt    0.1718    0.1362    0.2948
Pt    0.2134    0.1803    0.2992
Pt    0.1695    0.2211    0.2980
Pt    0.2555    0.1741    0.2658
Pt    0.1306    0.1780    0.2947
Pt    0.2176    0.0923    0.3773
Pt    0.0430    0.0911    0.2995
Pt    0.0057    0.0890    0.3418
Pt    0.1333    0.0925    0.3788
Pt    0.1754    0.1360    0.3783
Pt    0.2136    0.1782    0.3752
Pt    0.1670    0.2180    0.3795
Pt    0.1301    0.1730    0.3802
Pt    0.0471    0.1731    0.3799
Pt    0.0893    0.1329    0.3797
Pt    0.2143    0.1333    0.4192
Pt    0.2173    0.0473    0.4169
Pt    0.1319    0.2158    0.4231
Pt    0.0925    0.2543    0.4228
Pt    0.0901    0.0867    0.4236
Pt    0.0919    0.1725    0.4232
Pt    0.0493    0.1318    0.4254
Pt    0.1740    0.0893    0.4200
Pt    0.1752    0.1744    0.4194
Pt    0.1302    0.1282    0.4226
Pt    0.1314    0.0469    0.4208
Pt    0.0485    0.2156    0.4225
Pt    0.0903    0.0466    0.4652
Pt    0.0898    0.1319    0.4673
Pt    0.0901    0.2151    0.4655
Pt    0.1725    0.0471    0.4621
Pt    0.1715    0.1315    0.4633
Pt    0.0493    0.0464    0.4228
Pt    0.0459    0.0874    0.4678
Pt    0.0481    0.1734    0.4650
Pt    0.2139    0.0933    0.4659
Pt    0.1359    0.0881    0.4673
Pt    0.1336    0.1747    0.4648
Pt    0.0480    0.0900    0.3813
Pt    0.0064    0.1290    0.3832
Pt    0.0057    0.0453    0.4651
Pt    0.2160    0.0061    0.4614
Pt    0.0477    0.2548    0.4639
Pt    0.0493    0.0084    0.3810
Pt    0.0061    0.2146    0.4642
Pt    0.2546    0.0888    0.4221
Pt    0.0913    0.2133    0.3816
Pt    0.2554    0.0498    0.4643
Pt    0.0060    0.0461    0.3817
Pt    0.0075    0.0886    0.4235
Pt    0.0060    0.1323    0.4641
Pt    0.2164    0.1339    0.5911
Pt    0.2205    0.0524    0.5947
Pt    0.0495    0.0485    0.5110
Pt    0.1318    0.2159    0.5977
Pt    0.1315    0.1316    0.5887
Pt    0.1364    0.1781    0.5479
Pt    0.1341    0.0472    0.5087
Pt    0.1324    0.0851    0.5507
Pt    0.2198    0.0914    0.5502
Pt    0.0903    0.0896    0.5913
Pt    0.0477    0.1746    0.5491
Pt    0.0885    0.1760    0.5920
Pt    0.0471    0.0888    0.5501
Pt    0.0493    0.0464    0.5941
Pt    0.1796    0.1363    0.5461
Pt    0.1740    0.0899    0.5915
Pt    0.1746    0.1767    0.5890
Pt    0.1339    0.0443    0.5942
Pt    0.1770    0.0489    0.5526
Pt    0.0473    0.2151    0.5937
Pt    0.0920    0.2179    0.5545
Pt    0.0460    0.1364    0.5920
Pt    0.0918    0.0449    0.5509
Pt    0.0916    0.1321    0.5473
Pt    0.0492    0.2549    0.5520
Pt    0.0925    0.0896    0.5079
Pt    0.1336    0.1348    0.5068
Pt    0.0064    0.1347    0.5492
Pt    0.0455    0.2150    0.5073
Pt    0.0902    0.2523    0.5069
Pt    0.0915    0.1748    0.5084
Pt    0.1745    0.0922    0.5105
Pt    0.0476    0.1300    0.5069
Pt    0.2158    0.0520    0.5066
Pt    0.2153    0.0065    0.5498
Pt    0.1817    0.0059    0.5962
Pt    0.0063    0.0467    0.5516
Pt    0.0063    0.0886    0.5936
Pt    0.2171    0.2132    0.6783
Pt    0.2162    0.1329    0.6721
Pt    0.1330    0.1291    0.6732
Pt    0.0877    0.0924    0.6749
Pt    0.0917    0.1739    0.6750
Pt    0.1750    0.0882    0.6767
Pt    0.1744    0.1734    0.6725
Pt    0.1317    0.2147    0.6762
Pt    0.0933    0.0486    0.7155
Pt    0.0914    0.1319    0.7159
Pt    0.1743    0.1294    0.7184
Pt    0.1764    0.2117    0.7178
Pt    0.1353    0.0452    0.6758
Pt    0.0461    0.0916    0.7176
Pt    0.1317    0.0896    0.7147
Pt    0.1351    0.1697    0.7154
Pt    0.2161    0.1682    0.7174
Pt    0.0499    0.0487    0.6727
Pt    0.0452    0.1331    0.6764
Pt    0.0474    0.0912    0.6323
Pt    0.2153    0.0923    0.6333
Pt    0.0450    0.1750    0.6366
Pt    0.1315    0.1747    0.6329
Pt    0.0903    0.1340    0.6320
Pt    0.1798    0.0470    0.6347
Pt    0.1333    0.0872    0.6341
Pt    0.0491    0.0090    0.7141
Pt    0.0915    0.0466    0.6342
Pt    0.0074    0.0903    0.6777
Pt    0.1729    0.2160    0.6388
Pt    0.0072    0.0463    0.6340
Pt    0.0860    0.2181    0.6351
Pt    0.2167    0.2109    0.7553
Pt    0.0471    0.0483    0.7549
Pt    0.1727    0.1327    0.6307
Pt    0.2126    0.1751    0.6321
Pt    0.2144    0.0079    0.8783
Pt    0.1325    0.0470    0.8395
Pt    0.0478    0.1371    0.8353
Pt    0.0459    0.0463    0.8371
Pt    0.0498    0.0102    0.7932
Pt    0.0459    0.0940    0.8770
Pt    0.1737    0.0493    0.8789
Pt    0.1317    0.0078    0.7964
Pt    0.0903    0.0941    0.8370
Pt    0.0876    0.0524    0.8782
Pt    0.0477    0.0934    0.7964
Pt    0.0917    0.0492    0.7983
Pt    0.0907    0.0071    0.8369
Pt    0.0484    0.1775    0.8772
Pt    0.2115    0.2510    0.7966
Pt    0.0938    0.0071    0.7567
Pt    0.0061    0.0491    0.8764
Pt    0.2544    0.2123    0.7994
Pt    0.1733    0.0059    0.8378
Pt    0.0900    0.1333    0.8779
Pt    0.2518    0.2542    0.8376
Pt    0.1324    0.0908    0.8754
Pt    0.0913    0.0900    0.7563
Pt    0.1733    0.2541    0.7559
Pt    0.1312    0.0059    0.8799
Pt    0.2175    0.0475    0.9176
Pt    0.1310    0.1306    0.9227
Pt    0.1278    0.0497    0.9207
Pt    0.0463    0.2550    0.9630
Pt    0.0874    0.0926    0.9207
Pt    0.0883    0.1719    0.9215
Pt    0.2126    0.0896    0.9601
Pt    0.1708    0.0898    0.9189
Pt    0.0455    0.2139    0.9184
Pt    0.0469    0.1345    0.9175
Pt    0.0475    0.0491    0.9204
Pt    0.0867    0.0477    0.9663
Pt    0.0873    0.1342    0.9656
Pt    0.0901    0.2165    0.9593
Pt    0.1720    0.0488    0.9623
Pt    0.1690    0.1318    0.9652
Pt    0.1295    0.1773    0.9639
Pt    0.0465    0.0927    0.9638
Pt    0.0449    0.1758    0.9600
Pt    0.1281    0.0901    0.9631
Pt    0.2548    0.0880    0.9207
Pt    0.0060    0.0931    0.0050
Pt    0.0895    0.0071    0.9217
Pt    0.0468    0.0071    0.9627
Pt    0.1727    0.0067    0.9205
Pt    0.2550    0.0489    0.9618
Pt    0.0891    0.2548    0.9167
Pt    0.0462    0.2140    0.0037
Pt    0.2146    0.0491    0.0054
Pt    0.1710    0.1718    0.0033
Pt    0.2130    0.1314    0.0037
Pt    0.1714    0.0893    0.0049
Pt    0.1318    0.0483    0.0046
Pt    0.0441    0.1383    0.0041
Pt    0.2150    0.4629    0.0945
Pt    0.0075    0.5052    0.0063
Pt    0.2148    0.3787    0.0908
Pt    0.1320    0.4614    0.0889
Pt    0.0071    0.5021    0.0920
Pt    0.1286    0.3788    0.0858
Pt    0.0066    0.4170    0.0915
Pt    0.0898    0.5053    0.0074
Pt    0.1331    0.3325    0.0415
Pt    0.0897    0.3350    0.0891
Pt    0.0488    0.2937    0.0899
Pt    0.0886    0.4182    0.0904
Pt    0.1749    0.3373    0.0881
Pt    0.1316    0.4206    0.0472
Pt    0.1738    0.4197    0.0905
Pt    0.0496    0.3767    0.0935
Pt    0.1327    0.2947    0.0893
Pt    0.0473    0.4613    0.0912
Pt    0.0894    0.2903    0.0469
Pt    0.0879    0.3756    0.0459
Pt    0.0895    0.4629    0.0497
Pt    0.1745    0.3787    0.0452
Pt    0.1751    0.4603    0.0475
Pt    0.2186    0.4188    0.0506
Pt    0.0452    0.3368    0.0466
Pt    0.0484    0.4185    0.0478
Pt    0.0069    0.3356    0.0933
Pt    0.2547    0.4622    0.0494
Pt    0.0078    0.3775    0.0482
Pt    0.0936    0.2933    0.1295
Pt    0.1325    0.4635    0.0061
Pt    0.0891    0.4641    0.1300
Pt    0.1732    0.4634    0.1301
Pt    0.0475    0.4633    0.0083
Pt    0.2132    0.4618    0.0087
Pt    0.1310    0.5052    0.0485
Pt    0.2160    0.3801    0.1771
Pt    0.0927    0.3331    0.1746
Pt    0.0883    0.4203    0.1746
Pt    0.1726    0.3364    0.1742
Pt    0.1736    0.4233    0.1738
Pt    0.2153    0.2978    0.1716
Pt    0.1342    0.4643    0.1742
Pt    0.1345    0.3825    0.1768
Pt    0.0880    0.3762    0.1338
Pt    0.0530    0.5026    0.2135
Pt    0.0889    0.3738    0.2137
Pt    0.2152    0.4206    0.1350
Pt    0.0918    0.4610    0.2161
Pt    0.0482    0.4187    0.1342
Pt    0.1705    0.2940    0.2149
Pt    0.1305    0.4219    0.1325
Pt    0.1725    0.3798    0.2160
Pt    0.0062    0.4173    0.1749
Pt    0.0919    0.5025    0.1736
Pt    0.0489    0.4605    0.1749
Pt    0.0488    0.4170    0.2147
Pt    0.0492    0.3332    0.1333
Pt    0.1324    0.3375    0.2157
Pt    0.0450    0.3727    0.1756
Pt    0.1312    0.4211    0.2184
Pt    0.1362    0.2944    0.1711
Pt    0.2143    0.3376    0.2125
Pt    0.2142    0.2572    0.2137
Pt    0.0068    0.4647    0.2153
Pt    0.2153    0.3402    0.1323
Pt    0.1326    0.3379    0.1318
Pt    0.0493    0.4593    0.2555
Pt    0.2150    0.2990    0.2530
Pt    0.0061    0.4174    0.2537
Pt    0.0481    0.5050    0.1337
Pt    0.1740    0.3813    0.1352
Pt    0.0087    0.4617    0.1323
Pt    0.1753    0.2955    0.1313
Pt    0.0509    0.5029    0.2963
Pt    0.1295    0.4560    0.3382
Pt    0.0522    0.4612    0.3383
Pt    0.1739    0.4998    0.3375
Pt    0.0906    0.4148    0.3395
Pt    0.2142    0.4992    0.3788
Pt    0.0059    0.3791    0.3766
Pt    0.0494    0.3730    0.3386
Pt    0.0457    0.4180    0.2945
Pt    0.0068    0.5043    0.3356
Pt    0.1317    0.5031    0.3006
Pt    0.2137    0.2641    0.2982
Pt    0.0944    0.4599    0.2921
Pt    0.0074    0.4624    0.3777
Pt    0.2554    0.3001    0.2952
Pt    0.1339    0.5005    0.3800
Pt    0.0494    0.4205    0.3791
Pt    0.0481    0.5051    0.3801
Pt    0.0070    0.3759    0.2979
Pt    0.0907    0.4119    0.2582
Pt    0.1332    0.4161    0.3801
Pt    0.0908    0.5017    0.3393
Pt    0.0058    0.4638    0.2963
Pt    0.1747    0.4561    0.3759
Pt    0.1745    0.2574    0.2560
Pt    0.2152    0.4583    0.4210
Pt    0.1358    0.4594    0.4216
Pt    0.1324    0.3759    0.4192
Pt    0.0926    0.4608    0.3812
Pt    0.0902    0.3344    0.4204
Pt    0.0905    0.4171    0.4202
Pt    0.1757    0.4144    0.4200
Pt    0.0475    0.4609    0.4212
Pt    0.0477    0.3792    0.4222
Pt    0.0498    0.2929    0.4204
Pt    0.0914    0.2940    0.4666
Pt    0.0915    0.3790    0.4640
Pt    0.0930    0.4649    0.4636
Pt    0.1720    0.3790    0.4614
Pt    0.1782    0.4596    0.4627
Pt    0.0909    0.5036    0.4200
Pt    0.0480    0.3377    0.4619
Pt    0.0533    0.4207    0.4641
Pt    0.1336    0.3332    0.4597
Pt    0.1357    0.4196    0.4647
Pt    0.2203    0.4148    0.4632
Pt    0.0071    0.4675    0.4625
Pt    0.0447    0.3331    0.3808
Pt    0.2554    0.4607    0.4597
Pt    0.1744    0.5013    0.4197
Pt    0.0479    0.3775    0.5050
Pt    0.2556    0.5041    0.4176
Pt    0.0066    0.2995    0.4629
Pt    0.1703    0.3361    0.5035
Pt    0.1347    0.4645    0.5035
Pt    0.0072    0.4236    0.5053
Pt    0.0896    0.3754    0.3811
Pt    0.2155    0.4589    0.5931
Pt    0.0059    0.3812    0.5470
Pt    0.0470    0.2965    0.5100
Pt    0.1323    0.4625    0.5899
Pt    0.2134    0.3768    0.5070
Pt    0.1326    0.3797    0.5908
Pt    0.1752    0.4610    0.5508
Pt    0.0473    0.2966    0.5932
Pt    0.0478    0.3381    0.5498
Pt    0.0900    0.3382    0.5937
Pt    0.0083    0.4627    0.5466
Pt    0.0916    0.4218    0.5916
Pt    0.0939    0.4618    0.5462
Pt    0.1720    0.3753    0.5468
Pt    0.1747    0.4177    0.5897
Pt    0.2174    0.4160    0.5485
Pt    0.1330    0.4204    0.5483
Pt    0.0434    0.4637    0.5939
Pt    0.1305    0.3358    0.5485
Pt    0.0484    0.3804    0.5896
Pt    0.0469    0.4219    0.5526
Pt    0.0909    0.2941    0.5533
Pt    0.0877    0.3782    0.5471
Pt    0.1746    0.4221    0.5061
Pt    0.1776    0.5039    0.5067
Pt    0.0903    0.4211    0.5065
Pt    0.2160    0.5051    0.5495
Pt    0.1753    0.5045    0.5925
Pt    0.1298    0.2936    0.5064
Pt    0.0486    0.4637    0.5071
Pt    0.0904    0.2576    0.5967
Pt    0.0075    0.5045    0.5069
Pt    0.2173    0.4602    0.5078
Pt    0.0906    0.5041    0.5897
Pt    0.1316    0.3784    0.5057
Pt    0.0909    0.3363    0.5069
Pt    0.1343    0.4638    0.6740
Pt    0.0451    0.4615    0.6776
Pt    0.0879    0.4209    0.6777
Pt    0.0479    0.3748    0.6774
Pt    0.0466    0.3374    0.6335
Pt    0.0946    0.4637    0.7163
Pt    0.0453    0.4170    0.7192
Pt    0.0907    0.3787    0.6329
Pt    0.2547    0.2986    0.7171
Pt    0.0476    0.4632    0.7548
Pt    0.1318    0.4203    0.6350
Pt    0.1738    0.4599    0.6328
Pt    0.2152    0.2560    0.7156
Pt    0.0899    0.4627    0.6343
Pt    0.0474    0.4229    0.6343
Pt    0.0940    0.4217    0.7515
Pt    0.2168    0.5005    0.6330
Pt    0.0500    0.5022    0.6345
Pt    0.0057    0.4207    0.7554
Pt    0.1752    0.5047    0.6709
Pt    0.2554    0.2561    0.6744
Pt    0.0094    0.5032    0.7554
Pt    0.2131    0.3813    0.8353
Pt    0.2169    0.2953    0.8397
Pt    0.0879    0.3374    0.8328
Pt    0.0069    0.4618    0.7959
Pt    0.0917    0.4242    0.8345
Pt    0.0501    0.3401    0.8737
Pt    0.1705    0.3405    0.8367
Pt    0.1729    0.4216    0.8352
Pt    0.1739    0.3808    0.8790
Pt    0.1361    0.4679    0.8330
Pt    0.1288    0.3813    0.8346
Pt    0.0492    0.4212    0.8790
Pt    0.0923    0.3787    0.7911
Pt    0.1331    0.3402    0.7936
Pt    0.0900    0.4657    0.7965
Pt    0.2143    0.3365    0.7972
Pt    0.1736    0.2961    0.7998
Pt    0.1273    0.2971    0.8333
Pt    0.1713    0.3782    0.7940
Pt    0.0489    0.3818    0.8325
Pt    0.1334    0.4233    0.7934
Pt    0.0455    0.4606    0.8363
Pt    0.0484    0.4199    0.7920
Pt    0.2118    0.2954    0.7577
Pt    0.0062    0.4196    0.8392
Pt    0.1687    0.2916    0.8743
Pt    0.2159    0.4197    0.8790
Pt    0.1285    0.3376    0.8764
Pt    0.0892    0.3816    0.8773
Pt    0.0884    0.4655    0.8758
Pt    0.0899    0.2953    0.8760
Pt    0.1766    0.4656    0.8748
Pt    0.1307    0.4215    0.8766
Pt    0.0070    0.3786    0.8765
Pt    0.2139    0.3402    0.8754
Pt    0.2142    0.4651    0.9170
Pt    0.2134    0.3780    0.9219
Pt    0.1320    0.4640    0.9188
Pt    0.1709    0.5036    0.9198
Pt    0.0894    0.3371    0.9190
Pt    0.0907    0.4220    0.9204
Pt    0.1779    0.3326    0.9180
Pt    0.1731    0.4207    0.9187
Pt    0.1334    0.3763    0.9207
Pt    0.1340    0.2946    0.9219
Pt    0.0480    0.4619    0.9205
Pt    0.0925    0.2968    0.9611
Pt    0.0921    0.3768    0.9617
Pt    0.0879    0.4639    0.9628
Pt    0.1764    0.3778    0.9618
Pt    0.1737    0.4633    0.9605
Pt    0.1300    0.5040    0.9637
Pt    0.0462    0.3359    0.9600
Pt    0.0463    0.4221    0.9641
Pt    0.1373    0.3368    0.9620
Pt    0.1324    0.4212    0.9611
Pt    0.2144    0.4189    0.9637
Pt    0.0487    0.2954    0.9181
Pt    0.0474    0.3791    0.9196
Pt    0.0069    0.3784    0.9638
Pt    0.0481    0.2947    0.0026
Pt    0.0059    0.4217    0.9216
Pt    0.0065    0.4647    0.9629
Pt    0.0065    0.3351    0.9165
Pt    0.2534    0.4632    0.9648
Pt    0.1726    0.4187    0.0026
Pt    0.1295    0.3786    0.0036
Pt    0.0888    0.4218    0.0020
Pt    0.0906    0.3341    0.0047
Pt    0.0087    0.5048    0.9189
Pt    0.2545    0.4240    0.9216
Pt    0.2148    0.5030    0.9641
Pt    0.0089    0.4201    0.0047
Pt    0.0491    0.3770    0.0014
Pt    0.0894    0.2564    0.0029
Pt    0.2145    0.6302    0.0921
Pt    0.2155    0.5481    0.0870
Pt    0.1330    0.5473    0.0077
Pt    0.1340    0.7138    0.0937
Pt    0.1334    0.6311    0.0914
Pt    0.2192    0.5903    0.0456
Pt    0.1747    0.5491    0.0450
Pt    0.1325    0.6735    0.0488
Pt    0.1333    0.5909    0.0477
Pt    0.0905    0.5867    0.0939
Pt    0.0477    0.5491    0.0905
Pt    0.0914    0.6739    0.0908
Pt    0.0493    0.6752    0.0490
Pt    0.0492    0.6311    0.0917
Pt    0.0490    0.5895    0.0479
Pt    0.1738    0.5887    0.0933
Pt    0.1749    0.6712    0.0938
Pt    0.1343    0.5472    0.0894
Pt    0.1724    0.6312    0.0477
Pt    0.0481    0.7153    0.0959
Pt    0.0912    0.5479    0.0483
Pt    0.0914    0.6314    0.0504
Pt    0.0925    0.7163    0.0483
Pt    0.0066    0.5911    0.0913
Pt    0.0894    0.5929    0.0075
Pt    0.0502    0.6360    0.0061
Pt    0.0061    0.5512    0.0483
Pt    0.1737    0.5076    0.0905
Pt    0.2531    0.5077    0.0911
Pt    0.0944    0.6730    0.0062
Pt    0.0091    0.6744    0.0952
Pt    0.0079    0.6323    0.0489
Pt    0.0451    0.5076    0.0490
Pt    0.0073    0.7147    0.0509
Pt    0.0089    0.6740    0.0069
Pt    0.0876    0.5061    0.0888
Pt    0.2161    0.5062    0.0475
Pt    0.1326    0.5060    0.1302
Pt    0.1327    0.6316    0.0070
Pt    0.0473    0.5469    0.0066
Pt    0.0518    0.7158    0.0064
Pt    0.2185    0.7142    0.1709
Pt    0.2196    0.6282    0.1728
Pt    0.0489    0.6323    0.1787
Pt    0.0900    0.5913    0.1775
Pt    0.0901    0.6769    0.1812
Pt    0.1738    0.5894    0.1745
Pt    0.1744    0.6695    0.1729
Pt    0.1337    0.7124    0.1734
Pt    0.1306    0.6309    0.1747
Pt    0.1352    0.5437    0.1741
Pt    0.1321    0.5859    0.1348
Pt    0.0954    0.5470    0.2158
Pt    0.1360    0.6715    0.2150
Pt    0.0948    0.6308    0.2205
Pt    0.1750    0.7100    0.1335
Pt    0.0534    0.6718    0.1377
Pt    0.0081    0.5059    0.1727
Pt    0.1752    0.6279    0.2154
Pt    0.2540    0.6746    0.2552
Pt    0.1753    0.7171    0.2110
Pt    0.0513    0.5498    0.1780
Pt    0.2141    0.6757    0.2160
Pt    0.0906    0.5449    0.1351
Pt    0.0494    0.5919    0.2191
Pt    0.2199    0.5848    0.1362
Pt    0.1744    0.6284    0.1324
Pt    0.1340    0.5882    0.2184
Pt    0.0077    0.6314    0.1354
Pt    0.0887    0.7158    0.1393
Pt    0.1801    0.5444    0.1371
Pt    0.0070    0.5916    0.1764
Pt    0.0479    0.5880    0.1353
Pt    0.2134    0.7161    0.2544
Pt    0.2172    0.6691    0.1339
Pt    0.0510    0.5458    0.2549
Pt    0.1295    0.6712    0.1334
Pt    0.0905    0.6298    0.1346
Pt    0.0958    0.5062    0.2544
Pt    0.2552    0.7557    0.1696
Pt    0.0501    0.6740    0.3772
Pt    0.1347    0.5464    0.3367
Pt    0.0493    0.6317    0.3372
Pt    0.0492    0.5453    0.3363
Pt    0.0089    0.7183    0.3745
Pt    0.0935    0.5879    0.2572
Pt    0.0924    0.5458    0.2954
Pt    0.1746    0.5472    0.3780
Pt    0.0921    0.5885    0.3351
Pt    0.2537    0.7534    0.3354
Pt    0.0503    0.5913    0.2917
Pt    0.0091    0.6356    0.2951
Pt    0.0086    0.6352    0.3781
Pt    0.0060    0.5919    0.3386
Pt    0.0088    0.6734    0.3388
Pt    0.0931    0.6304    0.3781
Pt    0.0058    0.5487    0.2970
Pt    0.1314    0.5889    0.3801
Pt    0.0908    0.5469    0.3761
Pt    0.0499    0.5911    0.3784
Pt    0.2533    0.7170    0.2947
Pt    0.0085    0.5060    0.2567
Pt    0.2166    0.5465    0.4158
Pt    0.1318    0.6303    0.4240
Pt    0.1338    0.5453    0.4210
Pt    0.0062    0.5464    0.4654
Pt    0.0911    0.5911    0.4219
Pt    0.0933    0.6726    0.4189
Pt    0.2194    0.5916    0.4597
Pt    0.1813    0.5893    0.4192
Pt    0.0527    0.7157    0.4170
Pt    0.0496    0.6316    0.4217
Pt    0.0494    0.5487    0.4196
Pt    0.0891    0.5484    0.4621
Pt    0.0923    0.6315    0.4639
Pt    0.0930    0.7151    0.4626
Pt    0.1773    0.5457    0.4597
Pt    0.1751    0.6324    0.4615
Pt    0.1337    0.6739    0.4610
Pt    0.0499    0.5909    0.4649
Pt    0.0504    0.6745    0.4630
Pt    0.1366    0.5881    0.4639
Pt    0.1345    0.5061    0.4620
Pt    0.2180    0.5071    0.4616
Pt    0.0096    0.7121    0.4616
Pt    0.0058    0.6344    0.4612
Pt    0.0525    0.7545    0.4613
Pt    0.0919    0.7548    0.4168
Pt    0.0093    0.5873    0.4203
Pt    0.0084    0.7553    0.4184
Pt    0.0078    0.6773    0.4195
Pt    0.0910    0.6743    0.5050
Pt    0.0088    0.5058    0.4190
Pt    0.2142    0.6311    0.5056
Pt    0.1314    0.7139    0.5027
Pt    0.2553    0.5939    0.5047
Pt    0.1750    0.5915    0.5039
Pt    0.0504    0.5068    0.4631
Pt    0.0495    0.6319    0.5051
Pt    0.1759    0.6756    0.5024
Pt    0.2152    0.5513    0.5028
Pt    0.1322    0.5482    0.5048
Pt    0.1350    0.6346    0.5056
Pt    0.0498    0.7153    0.5053
Pt    0.1330    0.5061    0.5488
Pt    0.2155    0.5480    0.5939
Pt    0.1353    0.5925    0.5483
Pt    0.0485    0.6724    0.5494
Pt    0.1337    0.6348    0.5904
Pt    0.0510    0.5885    0.5470
Pt    0.0059    0.6329    0.5479
Pt    0.0491    0.5469    0.5910
Pt    0.1361    0.6760    0.5476
Pt    0.0927    0.5922    0.5901
Pt    0.1768    0.6342    0.5515
Pt    0.0917    0.6761    0.5916
Pt    0.1737    0.5489    0.5495
Pt    0.2137    0.5915    0.5493
Pt    0.0938    0.7147    0.5472
Pt    0.1768    0.5934    0.5932
Pt    0.0941    0.6325    0.5491
Pt    0.1339    0.5491    0.5916
Pt    0.0907    0.5478    0.5493
Pt    0.0474    0.7139    0.5916
Pt    0.0493    0.6308    0.5884
Pt    0.0495    0.7535    0.5500
Pt    0.0079    0.5888    0.5887
Pt    0.2552    0.5487    0.5495
Pt    0.0929    0.5908    0.5073
Pt    0.0489    0.5061    0.5498
Pt    0.0064    0.7164    0.5520
Pt    0.0960    0.7537    0.5908
Pt    0.0059    0.6320    0.6301
Pt    0.0058    0.5468    0.5501
Pt    0.0074    0.6750    0.5085
Pt    0.0065    0.5895    0.5076
Pt    0.0474    0.5475    0.5058
Pt    0.0907    0.5070    0.5059
Pt    0.1341    0.5501    0.6766
Pt    0.0475    0.6346    0.6745
Pt    0.0472    0.5515    0.6745
Pt    0.1726    0.7516    0.7549
Pt    0.0927    0.5959    0.6773
Pt    0.0930    0.5514    0.7159
Pt    0.0503    0.5943    0.7169
Pt    0.2518    0.7530    0.6707
Pt    0.0501    0.5932    0.6343
Pt    0.0907    0.5507    0.6327
Pt    0.1334    0.5059    0.7197
Pt    0.1729    0.5468    0.6344
Pt    0.0918    0.6360    0.6322
Pt    0.2147    0.7546    0.7138
Pt    0.1321    0.5920    0.6332
Pt    0.0923    0.5066    0.6766
Pt    0.0474    0.5088    0.7142
Pt    0.0925    0.5933    0.7545
Pt    0.2136    0.7128    0.7520
Pt    0.0480    0.6760    0.6317
Pt    0.2519    0.7101    0.7081
Pt    0.1315    0.5060    0.6328
Pt    0.0481    0.5511    0.7542
Pt    0.0061    0.5926    0.6731
Pt    0.0065    0.6728    0.6726
Pt    0.2148    0.7160    0.8370
Pt    0.1376    0.6694    0.7966
Pt    0.2163    0.6318    0.8410
Pt    0.1373    0.7177    0.8360
Pt    0.0492    0.6784    0.8772
Pt    0.0473    0.5524    0.8363
Pt    0.0462    0.5094    0.7969
Pt    0.0926    0.5912    0.8388
Pt    0.0903    0.6773    0.8385
Pt    0.1755    0.5916    0.8402
Pt    0.1755    0.6719    0.8385
Pt    0.1319    0.6338    0.8405
Pt    0.1363    0.5483    0.8354
Pt    0.0462    0.6344    0.8376
Pt    0.0910    0.5492    0.7931
Pt    0.2156    0.6716    0.7956
Pt    0.0904    0.6337    0.7984
Pt    0.2146    0.7554    0.7944
Pt    0.1756    0.5396    0.8744
Pt    0.0486    0.5060    0.8781
Pt    0.1777    0.6306    0.7981
Pt    0.0920    0.7203    0.8757
Pt    0.1733    0.7130    0.7944
Pt    0.0486    0.5930    0.8777
Pt    0.1332    0.5900    0.8790
Pt    0.2153    0.5881    0.8791
Pt    0.0484    0.5930    0.7955
Pt    0.1331    0.5922    0.7956
Pt    0.0063    0.5468    0.8753
Pt    0.0896    0.5071    0.8357
Pt    0.2555    0.7138    0.7930
Pt    0.0907    0.6355    0.8789
Pt    0.0902    0.5462    0.8784
Pt    0.1758    0.7169    0.8781
Pt    0.2180    0.6767    0.8784
Pt    0.1320    0.5063    0.8754
Pt    0.1353    0.6768    0.8805
Pt    0.0918    0.5076    0.7557
Pt    0.2179    0.6354    0.9233
Pt    0.2121    0.5460    0.9211
Pt    0.1355    0.7194    0.9251
Pt    0.2512    0.5070    0.9209
Pt    0.0906    0.5925    0.9209
Pt    0.0919    0.6774    0.9214
Pt    0.0497    0.6339    0.9197
Pt    0.1739    0.5888    0.9205
Pt    0.1776    0.6757    0.9211
Pt    0.1345    0.6347    0.9223
Pt    0.1343    0.5461    0.9202
Pt    0.0482    0.7192    0.9195
Pt    0.0922    0.5496    0.9609
Pt    0.0918    0.6328    0.9638
Pt    0.0933    0.7197    0.9627
Pt    0.1734    0.5476    0.9634
Pt    0.1753    0.6322    0.9643
Pt    0.0476    0.5521    0.9157
Pt    0.0476    0.5905    0.9607
Pt    0.0539    0.6787    0.9632
Pt    0.2187    0.5931    0.9603
Pt    0.1336    0.5915    0.9608
Pt    0.1375    0.6751    0.9676
Pt    0.0058    0.7134    0.9636
Pt    0.0063    0.5913    0.0034
Pt    0.1773    0.6321    0.8826
Pt    0.0864    0.5101    0.9217
Pt    0.0472    0.5082    0.9640
Pt    0.0071    0.6357    0.9621
Pt    0.2155    0.5472    0.0022
Pt    0.0090    0.6775    0.9178
Pt    0.1726    0.5062    0.0040
Pt    0.1756    0.5900    0.0029
Pt    0.2136    0.9607    0.0903
Pt    0.0079    0.8370    0.0894
Pt    0.1318    0.9634    0.0059
Pt    0.1317    0.9625    0.0902
Pt    0.1746    0.9595    0.0474
Pt    0.1314    0.8802    0.0914
Pt    0.0067    0.0034    0.0071
Pt    0.0472    0.8374    0.0495
Pt    0.0459    0.9234    0.0477
Pt    0.0911    0.8380    0.0919
Pt    0.0464    0.8797    0.0891
Pt    0.0887    0.9222    0.0874
Pt    0.0508    0.7940    0.0972
Pt    0.2151    0.9169    0.0420
Pt    0.1738    0.9194    0.0911
Pt    0.1355    0.9188    0.0468
Pt    0.1335    0.8382    0.0525
Pt    0.0469    0.9646    0.0899
Pt    0.0900    0.7972    0.0512
Pt    0.0901    0.8821    0.0491
Pt    0.0901    0.9660    0.0471
Pt    0.1765    0.8755    0.0516
Pt    0.0491    0.8791    0.0074
Pt    0.0500    0.7976    0.0100
Pt    0.1720    0.8349    0.0088
Pt    0.2537    0.9614    0.0469
Pt    0.2520    0.9179    0.0894
Pt    0.0915    0.8369    0.0094
Pt    0.2133    0.0029    0.0470
Pt    0.1324    0.7957    0.0080
Pt    0.0902    0.7558    0.0086
Pt    0.0090    0.7565    0.0085
Pt    0.0454    0.0056    0.0490
Pt    0.0876    0.0056    0.0918
Pt    0.1752    0.0019    0.0900
Pt    0.0060    0.7582    0.0969
Pt    0.0072    0.7956    0.0509
Pt    0.0919    0.7559    0.0927
Pt    0.0486    0.7564    0.0535
Pt    0.1332    0.9662    0.1759
Pt    0.0484    0.9659    0.1726
Pt    0.0914    0.9228    0.1739
Pt    0.0476    0.8791    0.1747
Pt    0.0487    0.9222    0.1313
Pt    0.0878    0.9621    0.1319
Pt    0.0438    0.9226    0.2148
Pt    0.1761    0.9636    0.1335
Pt    0.2146    0.8007    0.2515
Pt    0.1303    0.9242    0.1323
Pt    0.0893    0.9636    0.2155
Pt    0.0502    0.8386    0.1329
Pt    0.1722    0.7578    0.2491
Pt    0.0913    0.8821    0.1316
Pt    0.2146    0.7592    0.2089
Pt    0.0476    0.9665    0.2548
Pt    0.0932    0.9187    0.2505
Pt    0.2548    0.8010    0.2113
Pt    0.1750    0.0047    0.1739
Pt    0.2161    0.0016    0.1339
Pt    0.1336    0.0050    0.1330
Pt    0.2183    0.8738    0.3403
Pt    0.2165    0.7970    0.3345
Pt    0.0943    0.8403    0.3337
Pt    0.2178    0.9189    0.3757
Pt    0.0912    0.9234    0.3329
Pt    0.0537    0.8381    0.3754
Pt    0.1737    0.8400    0.3360
Pt    0.1772    0.9205    0.3339
Pt    0.0062    0.9624    0.3782
Pt    0.1347    0.9649    0.3366
Pt    0.1333    0.8813    0.3357
Pt    0.1313    0.8408    0.3773
Pt    0.0896    0.8826    0.2937
Pt    0.0091    0.8784    0.3797
Pt    0.0941    0.9641    0.2902
Pt    0.1385    0.9204    0.3758
Pt    0.1743    0.8027    0.2933
Pt    0.0902    0.9664    0.3781
Pt    0.1752    0.8788    0.2927
Pt    0.0500    0.9219    0.3773
Pt    0.2171    0.8407    0.2948
Pt    0.1313    0.7975    0.3304
Pt    0.0473    0.9246    0.2926
Pt    0.1805    0.9655    0.3741
Pt    0.1306    0.8428    0.2895
Pt    0.0499    0.9633    0.3338
Pt    0.1361    0.9221    0.2938
Pt    0.0482    0.8787    0.3344
Pt    0.0928    0.7954    0.3745
Pt    0.0918    0.8839    0.3745
Pt    0.1742    0.7984    0.3778
Pt    0.2108    0.7563    0.2942
Pt    0.2556    0.7988    0.2931
Pt    0.0058    0.9192    0.3333
Pt    0.0066    0.0030    0.3402
Pt    0.1319    0.0053    0.3767
Pt    0.2188    0.8368    0.3804
Pt    0.2182    0.9616    0.4163
Pt    0.2195    0.8786    0.4198
Pt    0.1321    0.9629    0.4188
Pt    0.0077    0.8774    0.4619
Pt    0.0939    0.8396    0.4197
Pt    0.0916    0.9198    0.4178
Pt    0.1801    0.8369    0.4196
Pt    0.1762    0.9206    0.4212
Pt    0.1369    0.8782    0.4225
Pt    0.1344    0.7960    0.4176
Pt    0.0479    0.9635    0.4217
Pt    0.0950    0.7947    0.4572
Pt    0.0905    0.8783    0.4617
Pt    0.0912    0.9607    0.4629
Pt    0.1768    0.8797    0.4648
Pt    0.1749    0.9636    0.4592
Pt    0.1763    0.0043    0.4171
Pt    0.0500    0.8360    0.4612
Pt    0.0487    0.9187    0.4608
Pt    0.1368    0.8339    0.4618
Pt    0.1307    0.9217    0.4611
Pt    0.2161    0.9215    0.4614
Pt    0.0520    0.7961    0.4176
Pt    0.0499    0.8785    0.4200
Pt    0.2540    0.0056    0.4166
Pt    0.0889    0.0028    0.4237
Pt    0.0078    0.9206    0.4208
Pt    0.0082    0.7959    0.4639
Pt    0.0072    0.9638    0.4637
Pt    0.1345    0.8798    0.5025
Pt    0.1324    0.0049    0.4623
Pt    0.0092    0.8360    0.4189
Pt    0.0933    0.8371    0.5038
Pt    0.1345    0.9625    0.5041
Pt    0.0477    0.0057    0.4661
Pt    0.0487    0.8785    0.5040
Pt    0.1757    0.9208    0.5042
Pt    0.2173    0.9620    0.5047
Pt    0.0498    0.7943    0.5040
Pt    0.2553    0.9168    0.4992
Pt    0.1767    0.8783    0.3811
Pt    0.2177    0.9584    0.5941
Pt    0.2526    0.0033    0.5953
Pt    0.2177    0.8760    0.5913
Pt    0.1390    0.9622    0.5955
Pt    0.0915    0.0052    0.5082
Pt    0.1362    0.8768    0.5868
Pt    0.1765    0.9629    0.5485
Pt    0.0072    0.9189    0.5922
Pt    0.0507    0.9623    0.5079
Pt    0.0942    0.8402    0.5849
Pt    0.0475    0.8384    0.5471
Pt    0.0951    0.9208    0.5921
Pt    0.1749    0.8345    0.5876
Pt    0.1742    0.8767    0.5465
Pt    0.1779    0.9187    0.5896
Pt    0.0510    0.7935    0.5904
Pt    0.1307    0.7964    0.5875
Pt    0.0478    0.9618    0.5933
Pt    0.2180    0.9166    0.5468
Pt    0.0521    0.8771    0.5913
Pt    0.0926    0.7960    0.5479
Pt    0.1353    0.9209    0.5466
Pt    0.0922    0.8798    0.5456
Pt    0.1372    0.8329    0.5440
Pt    0.0910    0.9621    0.5529
Pt    0.0488    0.9185    0.5491
Pt    0.0930    0.9227    0.5062
Pt    0.0068    0.0040    0.5076
Pt    0.0083    0.8394    0.5066
Pt    0.0075    0.8360    0.5907
Pt    0.0081    0.9201    0.5070
Pt    0.0078    0.7933    0.5495
Pt    0.1339    0.0029    0.5514
Pt    0.2549    0.9610    0.5520
Pt    0.1324    0.8372    0.6294
Pt    0.0496    0.0043    0.5516
Pt    0.0922    0.7995    0.6303
Pt    0.0900    0.0033    0.5968
Pt    0.2186    0.8322    0.6301
Pt    0.0943    0.8785    0.6300
Pt    0.0958    0.7586    0.5058
Pt    0.1749    0.0043    0.5062
Pt    0.2162    0.8761    0.6729
Pt    0.0953    0.8365    0.6759
Pt    0.0930    0.9164    0.6746
Pt    0.1729    0.8339    0.6716
Pt    0.1783    0.9203    0.6764
Pt    0.2141    0.7942    0.6719
Pt    0.0896    0.8745    0.7175
Pt    0.0928    0.9644    0.7171
Pt    0.1739    0.7956    0.7158
Pt    0.1727    0.8754    0.7164
Pt    0.0466    0.9169    0.7170
Pt    0.1313    0.8370    0.7160
Pt    0.1333    0.9218    0.7159
Pt    0.1367    0.9659    0.6779
Pt    0.2146    0.8382    0.7136
Pt    0.0502    0.8754    0.6729
Pt    0.0494    0.9616    0.6793
Pt    0.1318    0.7950    0.6764
Pt    0.1367    0.8785    0.6721
Pt    0.0094    0.8775    0.6333
Pt    0.0057    0.9562    0.6373
Pt    0.0933    0.0052    0.6752
Pt    0.0945    0.9599    0.6369
Pt    0.0480    0.8344    0.6325
Pt    0.2171    0.9160    0.6318
Pt    0.1389    0.9206    0.6319
Pt    0.1770    0.8725    0.6326
Pt    0.1823    0.9644    0.6393
Pt    0.0079    0.9156    0.6759
Pt    0.0506    0.9209    0.6355
Pt    0.1721    0.7940    0.6307
Pt    0.1360    0.0023    0.6350
Pt    0.0460    0.0018    0.6368
Pt    0.2557    0.7577    0.7536
Pt    0.0467    0.9647    0.7556
Pt    0.2117    0.7997    0.7573
Pt    0.1294    0.9640    0.8369
Pt    0.0499    0.9637    0.8305
Pt    0.0484    0.8359    0.8760
Pt    0.0886    0.9194    0.8319
Pt    0.0072    0.8772    0.8792
Pt    0.0471    0.9195    0.7964
Pt    0.0453    0.8771    0.8354
Pt    0.0058    0.0028    0.8376
Pt    0.0469    0.9231    0.8771
Pt    0.2527    0.7990    0.7994
Pt    0.0885    0.9207    0.7576
Pt    0.0930    0.9656    0.7938
Pt    0.0897    0.8786    0.8722
Pt    0.0060    0.9186    0.8401
Pt    0.0903    0.9611    0.8779
Pt    0.1308    0.9198    0.8766
Pt    0.1727    0.9623    0.8764
Pt    0.0066    0.9149    0.7558
Pt    0.0452    0.0027    0.8805
Pt    0.2529    0.8402    0.7560
Pt    0.2161    0.9634    0.9157
Pt    0.1303    0.9625    0.9185
Pt    0.1347    0.8799    0.9161
Pt    0.0920    0.7591    0.9192
Pt    0.0940    0.8371    0.9161
Pt    0.0873    0.9177    0.9196
Pt    0.1741    0.9235    0.9190
Pt    0.0463    0.9624    0.9243
Pt    0.0482    0.8743    0.9147
Pt    0.0498    0.7978    0.9192
Pt    0.0936    0.7987    0.9639
Pt    0.0927    0.8758    0.9606
Pt    0.0882    0.9642    0.9630
Pt    0.1717    0.8795    0.9596
Pt    0.1730    0.9629    0.9595
Pt    0.0096    0.9186    0.9188
Pt    0.0500    0.8389    0.9633
Pt    0.0503    0.9176    0.9635
Pt    0.1346    0.8359    0.9625
Pt    0.1313    0.9206    0.9615
Pt    0.2132    0.9181    0.9596
Pt    0.1724    0.9202    0.0017
Pt    0.2545    0.9148    0.0006
Pt    0.0060    0.8334    0.9206
Pt    0.0058    0.8790    0.9638
Pt    0.2183    0.0055    0.9592
Pt    0.1345    0.8785    0.0048
Pt    0.2132    0.9632    0.0040
Pt    0.2530    0.0034    0.0044
Pt    0.2541    0.9595    0.9608
Pt    0.2122    0.8751    0.9996
Pt    0.0490    0.7602    0.9626
Pt    0.0923    0.9207    0.0055
Pt    0.1313    0.0019    0.9618
Pt    0.2546    0.9200    0.9166
Pt    0.0508    0.9626    0.0055
Pt    0.4609    0.2164    0.0928
Pt    0.3374    0.0895    0.0084
Pt    0.2934    0.0453    0.0960
Pt    0.4624    0.1780    0.0489
Pt    0.4624    0.0905    0.0516
Pt    0.3790    0.1736    0.1300
Pt    0.2589    0.0430    0.0488
Pt    0.3382    0.0874    0.0919
Pt    0.3359    0.1737    0.0915
Pt    0.4652    0.1343    0.0904
Pt    0.4610    0.0489    0.0913
Pt    0.3750    0.2183    0.0932
Pt    0.4202    0.0906    0.0904
Pt    0.3788    0.1326    0.0897
Pt    0.4212    0.1744    0.0924
Pt    0.3789    0.0465    0.0890
Pt    0.3360    0.0470    0.0487
Pt    0.3356    0.1318    0.0485
Pt    0.4210    0.0481    0.0460
Pt    0.4201    0.1382    0.0489
Pt    0.4173    0.2200    0.0531
Pt    0.2565    0.0876    0.0912
Pt    0.2943    0.0892    0.0507
Pt    0.2947    0.1307    0.0920
Pt    0.3816    0.0932    0.0498
Pt    0.3749    0.1759    0.0508
Pt    0.5054    0.0068    0.0895
Pt    0.5043    0.0924    0.0076
Pt    0.4642    0.2147    0.0076
Pt    0.4214    0.0942    0.0073
Pt    0.4174    0.1813    0.0080
Pt    0.3776    0.0489    0.0084
Pt    0.4205    0.0062    0.0906
Pt    0.3775    0.1336    0.0074
Pt    0.4625    0.1363    0.0087
Pt    0.2949    0.0458    0.0064
Pt    0.3366    0.0879    0.1730
Pt    0.3368    0.1700    0.1756
Pt    0.4172    0.2162    0.1355
Pt    0.4211    0.0885    0.1766
Pt    0.4174    0.1715    0.1734
Pt    0.4617    0.1325    0.1778
Pt    0.2935    0.1732    0.1339
Pt    0.3381    0.2133    0.1356
Pt    0.3327    0.1267    0.2146
Pt    0.4628    0.0466    0.1793
Pt    0.3349    0.2123    0.2129
Pt    0.3352    0.0428    0.1352
Pt    0.4209    0.0485    0.2182
Pt    0.2933    0.0870    0.1366
Pt    0.4205    0.1342    0.2201
Pt    0.5030    0.0868    0.1758
Pt    0.3811    0.1292    0.1738
Pt    0.4207    0.1316    0.1330
Pt    0.2936    0.1709    0.2192
Pt    0.3795    0.0475    0.1728
Pt    0.4638    0.1742    0.1362
Pt    0.3792    0.0890    0.2173
Pt    0.2938    0.2107    0.1747
Pt    0.3733    0.1686    0.2192
Pt    0.3777    0.2127    0.1766
Pt    0.4642    0.0884    0.1346
Pt    0.2919    0.1332    0.1765
Pt    0.4636    0.0931    0.2214
Pt    0.3797    0.0899    0.1334
Pt    0.2565    0.2123    0.2176
Pt    0.4230    0.0462    0.1317
Pt    0.5052    0.1324    0.1372
Pt    0.3339    0.1311    0.1331
Pt    0.3410    0.2548    0.2556
Pt    0.4597    0.1326    0.3352
Pt    0.4657    0.0908    0.3760
Pt    0.4634    0.0463    0.3354
Pt    0.5040    0.1736    0.3358
Pt    0.4222    0.1326    0.3758
Pt    0.4216    0.0894    0.3349
Pt    0.4653    0.1744    0.3767
Pt    0.3387    0.0089    0.3367
Pt    0.4195    0.0469    0.2960
Pt    0.4619    0.0480    0.2572
Pt    0.4224    0.0485    0.3788
Pt    0.4638    0.0908    0.2964
Pt    0.2976    0.0073    0.3794
Pt    0.3797    0.0483    0.3390
Pt    0.3810    0.0913    0.3774
Pt    0.4150    0.0916    0.2589
Pt    0.3372    0.0496    0.3777
Pt    0.4204    0.0064    0.3386
Pt    0.3780    0.0079    0.2958
Pt    0.2997    0.2156    0.2565
Pt    0.4629    0.2149    0.4161
Pt    0.4646    0.1332    0.4176
Pt    0.4188    0.2557    0.5038
Pt    0.3350    0.0905    0.4176
Pt    0.3819    0.1331    0.5045
Pt    0.4238    0.0902    0.4194
Pt    0.4216    0.1752    0.4141
Pt    0.5046    0.1743    0.5049
Pt    0.3344    0.0542    0.4605
Pt    0.3356    0.1336    0.4596
Pt    0.4220    0.0486    0.4624
Pt    0.4243    0.1297    0.4619
Pt    0.4200    0.2150    0.4609
Pt    0.3399    0.1726    0.5031
Pt    0.2953    0.0963    0.4632
Pt    0.3785    0.2148    0.4991
Pt    0.3798    0.0929    0.4611
Pt    0.3801    0.1691    0.4582
Pt    0.4662    0.0490    0.4185
Pt    0.4648    0.0858    0.4658
Pt    0.4618    0.1754    0.4580
Pt    0.2950    0.0486    0.4190
Pt    0.3780    0.0508    0.4190
Pt    0.3806    0.1318    0.4170
Pt    0.4239    0.1736    0.5023
Pt    0.5035    0.1307    0.4626
Pt    0.4656    0.2554    0.4609
Pt    0.4197    0.0885    0.5056
Pt    0.3797    0.0063    0.4629
Pt    0.4629    0.1330    0.5048
Pt    0.2949    0.0071    0.4628
Pt    0.4627    0.2172    0.5024
Pt    0.3786    0.0472    0.5045
Pt    0.3380    0.0929    0.5032
Pt    0.4622    0.0087    0.4647
Pt    0.3381    0.0069    0.4233
Pt    0.4210    0.2543    0.4171
Pt    0.4218    0.0061    0.4215
Pt    0.2980    0.1350    0.5049
Pt    0.4200    0.0071    0.5053
Pt    0.5046    0.2542    0.5052
Pt    0.2568    0.0486    0.5508
Pt    0.4630    0.2168    0.5905
Pt    0.5043    0.0912    0.5917
Pt    0.4605    0.1324    0.5904
Pt    0.2586    0.0951    0.5900
Pt    0.4208    0.0071    0.5903
Pt    0.4647    0.0464    0.5912
Pt    0.3377    0.0933    0.5880
Pt    0.3767    0.1352    0.5933
Pt    0.4191    0.2150    0.5434
Pt    0.3792    0.0483    0.5897
Pt    0.2965    0.0478    0.5937
Pt    0.4211    0.0881    0.5920
Pt    0.4616    0.1741    0.5506
Pt    0.4201    0.1745    0.5946
Pt    0.2976    0.0922    0.5453
Pt    0.3375    0.0468    0.5483
Pt    0.4620    0.0918    0.5480
Pt    0.3389    0.1339    0.5472
Pt    0.4223    0.0472    0.5474
Pt    0.3786    0.1767    0.5468
Pt    0.4198    0.1337    0.5511
Pt    0.3774    0.0914    0.5481
Pt    0.5037    0.2154    0.5476
Pt    0.5030    0.1340    0.5476
Pt    0.4217    0.2539    0.5907
Pt    0.4663    0.0071    0.5474
Pt    0.3788    0.0076    0.5469
Pt    0.5050    0.1754    0.5922
Pt    0.4618    0.2531    0.5459
Pt    0.4653    0.0493    0.5081
Pt    0.2992    0.0504    0.5068
Pt    0.3799    0.0901    0.6306
Pt    0.2572    0.0941    0.5067
Pt    0.4624    0.1778    0.6352
Pt    0.4631    0.0086    0.6341
Pt    0.4179    0.0925    0.6771
Pt    0.2936    0.0065    0.6346
Pt    0.4178    0.0511    0.7164
Pt    0.4633    0.0940    0.6346
Pt    0.5041    0.0942    0.6761
Pt    0.4621    0.0928    0.7172
Pt    0.3759    0.0512    0.6754
Pt    0.4593    0.0487    0.6766
Pt    0.4615    0.1349    0.6757
Pt    0.4200    0.0478    0.6333
Pt    0.5054    0.1350    0.6313
Pt    0.3373    0.0487    0.6318
Pt    0.4193    0.1317    0.6345
Pt    0.4181    0.0061    0.6746
Pt    0.5040    0.1350    0.7165
Pt    0.5017    0.0477    0.7152
Pt    0.2583    0.1715    0.7555
Pt    0.3768    0.0069    0.6348
Pt    0.4592    0.0059    0.7148
Pt    0.2614    0.2105    0.7131
Pt    0.5023    0.0937    0.7529
Pt    0.4616    0.0487    0.7553
Pt    0.3390    0.2557    0.7550
Pt    0.4682    0.1378    0.8361
Pt    0.3344    0.0902    0.8365
Pt    0.3380    0.1748    0.8395
Pt    0.4230    0.0941    0.7569
Pt    0.5031    0.0074    0.8374
Pt    0.2938    0.1365    0.8403
Pt    0.4212    0.0899    0.8398
Pt    0.4219    0.1745    0.8400
Pt    0.4617    0.0491    0.8377
Pt    0.2965    0.2148    0.7576
Pt    0.3371    0.1332    0.7957
Pt    0.3792    0.2168    0.8429
Pt    0.3377    0.2170    0.8011
Pt    0.3365    0.1331    0.8804
Pt    0.4165    0.0457    0.7960
Pt    0.4200    0.0072    0.8399
Pt    0.4191    0.1319    0.7991
Pt    0.2970    0.0929    0.8789
Pt    0.3762    0.0485    0.8376
Pt    0.4605    0.0064    0.7968
Pt    0.2982    0.1748    0.7984
Pt    0.2942    0.2170    0.8408
Pt    0.5047    0.0484    0.7945
Pt    0.3809    0.0886    0.7954
Pt    0.4614    0.0921    0.7993
Pt    0.3800    0.1727    0.7972
Pt    0.3778    0.1313    0.8379
Pt    0.2560    0.2554    0.7576
Pt    0.3371    0.0509    0.8804
Pt    0.3781    0.0890    0.8778
Pt    0.4244    0.2184    0.8802
Pt    0.4653    0.1729    0.8803
Pt    0.4630    0.0905    0.8817
Pt    0.5053    0.1324    0.8820
Pt    0.3786    0.0465    0.9244
Pt    0.3397    0.0898    0.9214
Pt    0.3363    0.1759    0.9244
Pt    0.3786    0.1306    0.9236
Pt    0.4247    0.0906    0.9230
Pt    0.4219    0.1728    0.9225
Pt    0.4627    0.2175    0.9216
Pt    0.3354    0.0482    0.9616
Pt    0.3342    0.1341    0.9657
Pt    0.4206    0.0477    0.9679
Pt    0.4219    0.1344    0.9679
Pt    0.4203    0.2183    0.9649
Pt    0.4623    0.0466    0.9239
Pt    0.2960    0.0903    0.9625
Pt    0.3789    0.2155    0.9244
Pt    0.3797    0.0908    0.9676
Pt    0.3766    0.1721    0.9653
Pt    0.4664    0.1331    0.9230
Pt    0.4649    0.0906    0.9656
Pt    0.4633    0.1757    0.9649
Pt    0.2952    0.0467    0.9214
Pt    0.2916    0.1316    0.9187
Pt    0.2988    0.1754    0.8818
Pt    0.4194    0.0081    0.9229
Pt    0.5043    0.0060    0.9233
Pt    0.3793    0.0061    0.9655
Pt    0.4640    0.0485    0.0052
Pt    0.2560    0.0949    0.0027
Pt    0.4214    0.1299    0.8821
Pt    0.4612    0.0062    0.9644
Pt    0.4180    0.0468    0.8814
Pt    0.3409    0.2167    0.8811
Pt    0.5050    0.1349    0.9659
Pt    0.3804    0.1724    0.8806
Pt    0.4642    0.4654    0.0883
Pt    0.2573    0.4209    0.0973
Pt    0.4206    0.2590    0.0950
Pt    0.3811    0.4609    0.0932
Pt    0.3339    0.4194    0.0970
Pt    0.3371    0.4189    0.0097
Pt    0.2941    0.4649    0.0945
Pt    0.4611    0.3782    0.0933
Pt    0.4234    0.3342    0.0911
Pt    0.3827    0.3731    0.0941
Pt    0.4228    0.4216    0.0894
Pt    0.4200    0.2561    0.0076
Pt    0.3399    0.3785    0.0541
Pt    0.3335    0.4623    0.0532
Pt    0.4220    0.2946    0.0505
Pt    0.4231    0.3806    0.0475
Pt    0.4192    0.4643    0.0479
Pt    0.2933    0.4162    0.0534
Pt    0.3813    0.3375    0.0507
Pt    0.3809    0.4197    0.0512
Pt    0.4236    0.3361    0.0087
Pt    0.4653    0.3416    0.0488
Pt    0.4667    0.4229    0.0478
Pt    0.4667    0.2944    0.0936
Pt    0.2568    0.4182    0.0058
Pt    0.3748    0.4633    0.0069
Pt    0.4640    0.4664    0.0064
Pt    0.4650    0.3826    0.0062
Pt    0.2989    0.3780    0.0098
Pt    0.3799    0.2949    0.0091
Pt    0.4649    0.2565    0.0518
Pt    0.3779    0.3801    0.0061
Pt    0.4651    0.2947    0.0082
Pt    0.3353    0.5036    0.0931
Pt    0.4190    0.5038    0.0068
Pt    0.4225    0.5055    0.0891
Pt    0.3764    0.5051    0.0499
Pt    0.5055    0.3406    0.0904
Pt    0.4636    0.4227    0.1297
Pt    0.3805    0.5036    0.1302
Pt    0.5039    0.5050    0.0074
Pt    0.4611    0.4641    0.1769
Pt    0.4218    0.4222    0.1710
Pt    0.2994    0.2595    0.2115
Pt    0.5045    0.4221    0.1718
Pt    0.4232    0.3753    0.1366
Pt    0.2558    0.2985    0.2109
Pt    0.4157    0.4616    0.2170
Pt    0.4634    0.4640    0.2518
Pt    0.2994    0.3002    0.2515
Pt    0.3382    0.4631    0.1355
Pt    0.4642    0.3377    0.1335
Pt    0.4591    0.4199    0.2153
Pt    0.3808    0.4648    0.1726
Pt    0.4641    0.3800    0.1739
Pt    0.2578    0.3414    0.2547
Pt    0.4180    0.4198    0.2540
Pt    0.5048    0.3787    0.2148
Pt    0.2558    0.2595    0.2545
Pt    0.4237    0.4653    0.1312
Pt    0.3820    0.4166    0.1318
Pt    0.4607    0.4621    0.3331
Pt    0.2974    0.4203    0.3791
Pt    0.4649    0.3805    0.3368
Pt    0.4246    0.3772    0.3766
Pt    0.3411    0.3381    0.3352
Pt    0.3367    0.4202    0.3369
Pt    0.4244    0.3408    0.3308
Pt    0.4204    0.4660    0.3738
Pt    0.4208    0.4235    0.3350
Pt    0.3786    0.4650    0.3347
Pt    0.3410    0.2976    0.2942
Pt    0.3780    0.4226    0.3770
Pt    0.3382    0.3827    0.2929
Pt    0.3361    0.4677    0.3775
Pt    0.3005    0.2970    0.3350
Pt    0.4664    0.4195    0.2948
Pt    0.4227    0.3832    0.2952
Pt    0.3775    0.4245    0.2955
Pt    0.4191    0.4667    0.2917
Pt    0.2954    0.3778    0.3346
Pt    0.2978    0.2582    0.2949
Pt    0.3009    0.3411    0.2930
Pt    0.4655    0.3356    0.3765
Pt    0.3865    0.2976    0.3306
Pt    0.3807    0.3401    0.2931
Pt    0.3821    0.3822    0.3362
Pt    0.3374    0.3793    0.3776
Pt    0.4205    0.2993    0.3780
Pt    0.3816    0.3386    0.3741
Pt    0.3003    0.3361    0.3754
Pt    0.3416    0.2943    0.3738
Pt    0.2573    0.2610    0.3382
Pt    0.4621    0.4212    0.3783
Pt    0.5047    0.4647    0.3780
Pt    0.4636    0.2958    0.5020
Pt    0.3405    0.3337    0.4183
Pt    0.3389    0.4202    0.4204
Pt    0.3768    0.3727    0.5043
Pt    0.4217    0.3370    0.4212
Pt    0.4194    0.4229    0.4197
Pt    0.4630    0.4656    0.4209
Pt    0.3390    0.3777    0.4617
Pt    0.3365    0.4627    0.4586
Pt    0.4234    0.2947    0.4593
Pt    0.4206    0.3791    0.4605
Pt    0.4209    0.4639    0.4613
Pt    0.2968    0.4178    0.4617
Pt    0.3749    0.3326    0.4623
Pt    0.3810    0.4211    0.4615
Pt    0.2950    0.4600    0.5038
Pt    0.4670    0.3399    0.4619
Pt    0.4641    0.4228    0.4616
Pt    0.2988    0.3754    0.4211
Pt    0.2968    0.4617    0.4205
Pt    0.3792    0.2924    0.4194
Pt    0.3796    0.3799    0.4183
Pt    0.3790    0.4641    0.4197
Pt    0.4648    0.2954    0.4202
Pt    0.4637    0.3826    0.4195
Pt    0.4222    0.4153    0.5037
Pt    0.3388    0.4171    0.5040
Pt    0.4630    0.4638    0.5029
Pt    0.2938    0.5037    0.4604
Pt    0.4189    0.3350    0.5025
Pt    0.4660    0.3774    0.5053
Pt    0.3785    0.4626    0.5041
Pt    0.5040    0.4195    0.5030
Pt    0.5042    0.4658    0.4606
Pt    0.3371    0.5032    0.5008
Pt    0.2568    0.4181    0.4205
Pt    0.5045    0.3375    0.4181
Pt    0.2568    0.4157    0.5056
Pt    0.2982    0.4631    0.5904
Pt    0.5041    0.2957    0.5479
Pt    0.3331    0.3332    0.5880
Pt    0.3791    0.3339    0.5485
Pt    0.3374    0.4202    0.5871
Pt    0.4618    0.2957    0.5888
Pt    0.3781    0.4189    0.5436
Pt    0.4610    0.3742    0.5906
Pt    0.4192    0.3344    0.5903
Pt    0.2957    0.4189    0.5462
Pt    0.4222    0.4200    0.5873
Pt    0.4619    0.4626    0.5874
Pt    0.3771    0.4628    0.5901
Pt    0.3355    0.3749    0.5460
Pt    0.2927    0.3792    0.5894
Pt    0.3352    0.4597    0.5444
Pt    0.3782    0.2936    0.5886
Pt    0.4200    0.2948    0.5464
Pt    0.2571    0.4233    0.5917
Pt    0.4170    0.3782    0.5457
Pt    0.4633    0.4160    0.5449
Pt    0.4210    0.4583    0.5437
Pt    0.4600    0.3358    0.5467
Pt    0.3763    0.3782    0.5872
Pt    0.5048    0.3346    0.5918
Pt    0.2942    0.3382    0.6301
Pt    0.2572    0.4621    0.5497
Pt    0.4189    0.3787    0.6289
Pt    0.4647    0.4214    0.6288
Pt    0.3759    0.5055    0.5466
Pt    0.3763    0.3353    0.6286
Pt    0.2570    0.5050    0.5912
Pt    0.4190    0.5032    0.5885
Pt    0.3347    0.3800    0.6279
Pt    0.5036    0.4622    0.5490
Pt    0.2582    0.5037    0.5057
Pt    0.4642    0.4642    0.6728
Pt    0.3361    0.3398    0.6713
Pt    0.3372    0.4223    0.6748
Pt    0.4184    0.3366    0.6711
Pt    0.4230    0.4206    0.6719
Pt    0.4651    0.3765    0.6731
Pt    0.3368    0.2987    0.7147
Pt    0.3368    0.3811    0.7147
Pt    0.4227    0.3783    0.7162
Pt    0.4199    0.4646    0.7134
Pt    0.2979    0.2577    0.7141
Pt    0.2964    0.3395    0.7143
Pt    0.3763    0.3408    0.7117
Pt    0.3810    0.4196    0.7151
Pt    0.4636    0.4193    0.7136
Pt    0.2951    0.2978    0.6727
Pt    0.2967    0.3816    0.6697
Pt    0.3745    0.2957    0.6727
Pt    0.3771    0.3802    0.6703
Pt    0.3743    0.4647    0.6748
Pt    0.4644    0.3338    0.6334
Pt    0.4167    0.2933    0.6360
Pt    0.4208    0.5053    0.6714
Pt    0.3772    0.4230    0.6317
Pt    0.3358    0.4714    0.6342
Pt    0.2968    0.4275    0.6327
Pt    0.5043    0.4218    0.6693
Pt    0.4614    0.5044    0.7143
Pt    0.4156    0.5043    0.7534
Pt    0.4199    0.4643    0.6319
Pt    0.3318    0.2953    0.6326
Pt    0.4643    0.4625    0.8345
Pt    0.3765    0.4181    0.8775
Pt    0.4590    0.3806    0.8347
Pt    0.2988    0.2971    0.7567
Pt    0.3744    0.4597    0.8365
Pt    0.4190    0.4215    0.8379
Pt    0.5053    0.4202    0.8387
Pt    0.4616    0.3351    0.8797
Pt    0.4619    0.4209    0.7935
Pt    0.4183    0.4634    0.7973
Pt    0.3762    0.5055    0.7957
Pt    0.2579    0.2940    0.7977
Pt    0.5028    0.3783    0.7984
Pt    0.3387    0.5026    0.8405
Pt    0.5024    0.3370    0.8422
Pt    0.2564    0.3388    0.7620
Pt    0.5031    0.4637    0.8777
Pt    0.4200    0.4614    0.8804
Pt    0.4613    0.4210    0.8775
Pt    0.5054    0.3773    0.8792
Pt    0.5026    0.5050    0.8332
Pt    0.2995    0.2565    0.7971
Pt    0.3757    0.5052    0.8797
Pt    0.4641    0.4630    0.7562
Pt    0.4202    0.4245    0.7573
Pt    0.4638    0.4649    0.9189
Pt    0.3369    0.4192    0.9230
Pt    0.4628    0.2567    0.9657
Pt    0.4190    0.3387    0.9200
Pt    0.4205    0.4227    0.9222
Pt    0.4214    0.3793    0.8806
Pt    0.3344    0.3798    0.9645
Pt    0.3361    0.4625    0.9648
Pt    0.4202    0.2981    0.9641
Pt    0.4222    0.3799    0.9642
Pt    0.4215    0.4669    0.9644
Pt    0.2929    0.4163    0.9630
Pt    0.3776    0.3378    0.9638
Pt    0.3807    0.4228    0.9627
Pt    0.4180    0.2584    0.9220
Pt    0.4638    0.3369    0.9664
Pt    0.4636    0.4234    0.9634
Pt    0.2967    0.4622    0.9232
Pt    0.3783    0.3815    0.9239
Pt    0.3793    0.4635    0.9247
Pt    0.4619    0.2947    0.9208
Pt    0.4619    0.3785    0.9224
Pt    0.5053    0.4650    0.9587
Pt    0.3370    0.5041    0.9230
Pt    0.5051    0.3350    0.9232
Pt    0.5056    0.4187    0.9208
Pt    0.5032    0.3788    0.9649
Pt    0.2968    0.4616    0.0049
Pt    0.3345    0.4620    0.8823
Pt    0.2950    0.5034    0.8839
Pt    0.3409    0.3371    0.0053
Pt    0.4222    0.4242    0.0055
Pt    0.2575    0.5509    0.0476
Pt    0.4631    0.7188    0.0907
Pt    0.5046    0.5883    0.0086
Pt    0.4642    0.6366    0.0917
Pt    0.2923    0.5058    0.0489
Pt    0.3823    0.5928    0.0503
Pt    0.4624    0.5516    0.0915
Pt    0.3389    0.5929    0.0917
Pt    0.3791    0.6357    0.0910
Pt    0.3813    0.6724    0.0474
Pt    0.3823    0.5508    0.0912
Pt    0.2967    0.5482    0.0919
Pt    0.4228    0.5954    0.0962
Pt    0.4659    0.6737    0.0465
Pt    0.4231    0.6744    0.0900
Pt    0.4593    0.5479    0.0058
Pt    0.3366    0.5468    0.0506
Pt    0.3386    0.6346    0.0523
Pt    0.4207    0.5484    0.0505
Pt    0.4239    0.6337    0.0497
Pt    0.4222    0.7158    0.0492
Pt    0.2582    0.5898    0.0913
Pt    0.2982    0.5934    0.0490
Pt    0.4628    0.5924    0.0513
Pt    0.2570    0.5071    0.0057
Pt    0.4187    0.7530    0.0942
Pt    0.3391    0.6727    0.0060
Pt    0.5055    0.7171    0.0492
Pt    0.4640    0.5082    0.0489
Pt    0.5053    0.5509    0.0521
Pt    0.2995    0.5492    0.0069
Pt    0.3815    0.7150    0.0109
Pt    0.3802    0.5485    0.0071
Pt    0.4205    0.5903    0.0082
Pt    0.3367    0.5069    0.0067
Pt    0.4606    0.7143    0.0060
Pt    0.4638    0.5934    0.2146
Pt    0.4633    0.5946    0.1354
Pt    0.4169    0.5913    0.1742
Pt    0.4629    0.6758    0.1353
Pt    0.2966    0.5076    0.1325
Pt    0.4627    0.5503    0.2552
Pt    0.4164    0.5526    0.2171
Pt    0.4223    0.6372    0.1343
Pt    0.4631    0.6353    0.1747
Pt    0.4203    0.5081    0.1741
Pt    0.3782    0.5489    0.1711
Pt    0.4605    0.5496    0.1752
Pt    0.5044    0.7160    0.1307
Pt    0.4211    0.5098    0.2551
Pt    0.4211    0.5943    0.2536
Pt    0.4632    0.5072    0.2153
Pt    0.2986    0.7163    0.2537
Pt    0.2581    0.7147    0.2125
Pt    0.3803    0.5953    0.1339
Pt    0.5043    0.5552    0.1335
Pt    0.5057    0.6783    0.1756
Pt    0.3816    0.5059    0.2156
Pt    0.3397    0.5060    0.1725
Pt    0.4674    0.5060    0.1308
Pt    0.3368    0.5477    0.1316
Pt    0.4226    0.5489    0.1313
Pt    0.4626    0.6359    0.3341
Pt    0.3370    0.5919    0.3363
Pt    0.3360    0.6760    0.3411
Pt    0.3797    0.5058    0.3800
Pt    0.3795    0.6340    0.3365
Pt    0.4650    0.5061    0.2924
Pt    0.4222    0.5943    0.3384
Pt    0.4209    0.6776    0.3346
Pt    0.4652    0.5498    0.3364
Pt    0.3387    0.7541    0.2577
Pt    0.3399    0.6355    0.2974
Pt    0.2918    0.7121    0.3381
Pt    0.3366    0.7165    0.3005
Pt    0.4654    0.5917    0.3777
Pt    0.4239    0.5501    0.2963
Pt    0.4631    0.6776    0.3782
Pt    0.4203    0.6361    0.2943
Pt    0.4182    0.5081    0.3341
Pt    0.3780    0.7196    0.3386
Pt    0.2961    0.6348    0.3398
Pt    0.2971    0.6742    0.2948
Pt    0.4209    0.5499    0.3771
Pt    0.3384    0.6318    0.3793
Pt    0.3809    0.5911    0.2963
Pt    0.3776    0.5481    0.3353
Pt    0.3778    0.6778    0.2960
Pt    0.4653    0.5961    0.2923
Pt    0.3785    0.5907    0.3783
Pt    0.3376    0.5502    0.3779
Pt    0.3803    0.6776    0.3797
Pt    0.2964    0.5887    0.3779
Pt    0.5043    0.5487    0.3797
Pt    0.4604    0.5093    0.3759
Pt    0.5038    0.6332    0.3769
Pt    0.4240    0.7166    0.3752
Pt    0.5048    0.5955    0.3337
Pt    0.4633    0.7152    0.5036
Pt    0.3760    0.5476    0.5053
Pt    0.2936    0.6752    0.3816
Pt    0.3395    0.5903    0.4219
Pt    0.3386    0.6800    0.4199
Pt    0.3776    0.5073    0.4617
Pt    0.4207    0.5916    0.4204
Pt    0.4185    0.6777    0.4239
Pt    0.4637    0.7166    0.4187
Pt    0.3348    0.5517    0.4641
Pt    0.3375    0.6387    0.4647
Pt    0.4203    0.5508    0.4648
Pt    0.4222    0.6335    0.4624
Pt    0.4230    0.7179    0.4617
Pt    0.4619    0.5491    0.4184
Pt    0.2955    0.5933    0.4613
Pt    0.3810    0.7203    0.4185
Pt    0.3773    0.5947    0.4631
Pt    0.3773    0.6824    0.4637
Pt    0.4622    0.6321    0.4196
Pt    0.4628    0.5911    0.4627
Pt    0.4639    0.6765    0.4628
Pt    0.2928    0.5458    0.4173
Pt    0.3001    0.6322    0.4210
Pt    0.3801    0.5511    0.4224
Pt    0.3787    0.6347    0.4212
Pt    0.2561    0.5898    0.4157
Pt    0.4220    0.5062    0.4190
Pt    0.3405    0.5070    0.4194
Pt    0.5024    0.6737    0.4199
Pt    0.5056    0.6334    0.4650
Pt    0.4198    0.6768    0.5049
Pt    0.4621    0.5082    0.4622
Pt    0.2569    0.5487    0.4611
Pt    0.5044    0.5092    0.4194
Pt    0.3772    0.6374    0.5050
Pt    0.2952    0.5488    0.5054
Pt    0.4232    0.5915    0.5031
Pt    0.5041    0.5929    0.4212
Pt    0.4203    0.5074    0.5051
Pt    0.4203    0.6352    0.3808
Pt    0.3335    0.7184    0.3809
Pt    0.4666    0.7203    0.5960
Pt    0.2927    0.5931    0.5457
Pt    0.4617    0.5062    0.6291
Pt    0.3370    0.5920    0.5068
Pt    0.4644    0.7543    0.5490
Pt    0.3803    0.5907    0.5455
Pt    0.4623    0.5484    0.5887
Pt    0.3348    0.5923    0.5884
Pt    0.3354    0.6734    0.5896
Pt    0.3780    0.7185    0.5889
Pt    0.4196    0.7153    0.5458
Pt    0.3791    0.6319    0.5875
Pt    0.4224    0.5924    0.5892
Pt    0.3806    0.5483    0.5873
Pt    0.4200    0.6749    0.5898
Pt    0.2920    0.6356    0.5911
Pt    0.3359    0.5498    0.5478
Pt    0.2953    0.5461    0.5907
Pt    0.3385    0.6339    0.5458
Pt    0.4615    0.6743    0.5491
Pt    0.4618    0.5916    0.5484
Pt    0.4209    0.5483    0.5458
Pt    0.4653    0.6324    0.5894
Pt    0.4205    0.6331    0.5468
Pt    0.3798    0.6770    0.5459
Pt    0.3375    0.5064    0.5910
Pt    0.5052    0.5899    0.5056
Pt    0.5030    0.6762    0.5927
Pt    0.4623    0.5505    0.5068
Pt    0.4637    0.6342    0.5058
Pt    0.2570    0.5893    0.5937
Pt    0.4636    0.5059    0.5493
Pt    0.2989    0.5063    0.5469
Pt    0.3796    0.5907    0.6275
Pt    0.4648    0.5912    0.6300
Pt    0.3358    0.5907    0.6733
Pt    0.3380    0.6733    0.6705
Pt    0.4225    0.7193    0.6331
Pt    0.4197    0.5936    0.6740
Pt    0.4213    0.6722    0.6748
Pt    0.4630    0.6320    0.6742
Pt    0.3352    0.6318    0.7105
Pt    0.3371    0.7138    0.7121
Pt    0.4176    0.5477    0.7158
Pt    0.4195    0.6311    0.7166
Pt    0.2972    0.6747    0.7104
Pt    0.3785    0.5878    0.7163
Pt    0.3793    0.6741    0.7145
Pt    0.5056    0.5492    0.7128
Pt    0.4607    0.5884    0.7148
Pt    0.2905    0.6352    0.6695
Pt    0.2980    0.7175    0.6693
Pt    0.3779    0.5482    0.6733
Pt    0.3780    0.6308    0.6734
Pt    0.3799    0.7164    0.6708
Pt    0.4622    0.5487    0.6707
Pt    0.3397    0.7161    0.6308
Pt    0.4617    0.5498    0.7552
Pt    0.4226    0.6320    0.6308
Pt    0.4202    0.5494    0.6333
Pt    0.5033    0.5086    0.6741
Pt    0.2959    0.5918    0.6333
Pt    0.3376    0.5489    0.6321
Pt    0.4630    0.6749    0.6335
Pt    0.2959    0.7145    0.7539
Pt    0.5037    0.5916    0.7548
Pt    0.5054    0.5924    0.6692
Pt    0.5047    0.5060    0.7553
Pt    0.3346    0.6312    0.6313
Pt    0.2931    0.7547    0.7115
Pt    0.3800    0.6762    0.6315
Pt    0.3797    0.5072    0.6310
Pt    0.2956    0.6776    0.6319
Pt    0.4619    0.6341    0.8331
Pt    0.4167    0.5917    0.7565
Pt    0.4607    0.5504    0.8353
Pt    0.4621    0.5926    0.7945
Pt    0.3768    0.5492    0.8348
Pt    0.4191    0.5930    0.8377
Pt    0.4615    0.5068    0.8761
Pt    0.4188    0.5485    0.8776
Pt    0.4175    0.5463    0.7927
Pt    0.2561    0.7556    0.8381
Pt    0.4634    0.5912    0.8780
Pt    0.4236    0.6329    0.8775
Pt    0.4612    0.6749    0.8769
Pt    0.3821    0.5907    0.8793
Pt    0.3362    0.5478    0.8770
Pt    0.5037    0.5490    0.8782
Pt    0.5041    0.5466    0.7935
Pt    0.4141    0.5061    0.8365
Pt    0.4594    0.5072    0.7932
Pt    0.5056    0.5899    0.8379
Pt    0.5054    0.6714    0.8343
Pt    0.2584    0.6735    0.7568
Pt    0.4624    0.7173    0.9177
Pt    0.4659    0.6348    0.9190
Pt    0.2575    0.5504    0.9619
Pt    0.3400    0.5923    0.9198
Pt    0.2960    0.5075    0.9630
Pt    0.4220    0.5943    0.9195
Pt    0.4196    0.6714    0.9197
Pt    0.4240    0.6745    0.0055
Pt    0.3396    0.5506    0.9623
Pt    0.3377    0.6337    0.9617
Pt    0.4230    0.5487    0.9647
Pt    0.4225    0.6317    0.9629
Pt    0.4195    0.7157    0.9620
Pt    0.5041    0.5082    0.9172
Pt    0.2963    0.5944    0.9599
Pt    0.2578    0.5927    0.0025
Pt    0.3809    0.5922    0.9629
Pt    0.3802    0.6752    0.9622
Pt    0.4615    0.5488    0.9209
Pt    0.4627    0.5911    0.9646
Pt    0.4624    0.6762    0.9602
Pt    0.2978    0.5508    0.9226
Pt    0.3814    0.5463    0.9221
Pt    0.3778    0.6350    0.9206
Pt    0.3793    0.5064    0.9615
Pt    0.4641    0.5062    0.9613
Pt    0.4222    0.5066    0.9203
Pt    0.5046    0.6331    0.9649
Pt    0.5054    0.5895    0.9207
Pt    0.4188    0.7548    0.9208
Pt    0.4634    0.6313    0.0043
Pt    0.2566    0.5903    0.9172
Pt    0.5032    0.5481    0.9632
Pt    0.2985    0.6344    0.0047
Pt    0.4203    0.7551    0.0053
Pt    0.3788    0.6315    0.0055
Pt    0.3385    0.5921    0.0049
Pt    0.3790    0.9613    0.0087
Pt    0.3778    0.8753    0.0080
Pt    0.3362    0.8338    0.0874
Pt    0.4634    0.8775    0.0898
Pt    0.3374    0.9199    0.0892
Pt    0.5050    0.7571    0.0924
Pt    0.4632    0.7563    0.0490
Pt    0.4628    0.7945    0.0909
Pt    0.4210    0.8349    0.0918
Pt    0.3805    0.9627    0.0919
Pt    0.4235    0.9209    0.0903
Pt    0.4648    0.9638    0.0903
Pt    0.3338    0.8752    0.0472
Pt    0.3392    0.9599    0.0471
Pt    0.4195    0.7934    0.0477
Pt    0.4221    0.8754    0.0472
Pt    0.4236    0.9620    0.0483
Pt    0.2932    0.9158    0.0443
Pt    0.3778    0.8336    0.0464
Pt    0.3816    0.9194    0.0496
Pt    0.3790    0.8805    0.0869
Pt    0.4620    0.8359    0.0480
Pt    0.4625    0.9220    0.0501
Pt    0.2941    0.8824    0.0915
Pt    0.3356    0.0029    0.0928
Pt    0.2967    0.9613    0.0886
Pt    0.3778    0.7929    0.0889
Pt    0.3369    0.0035    0.0069
Pt    0.5041    0.8781    0.0460
Pt    0.4643    0.0049    0.0486
Pt    0.2559    0.0014    0.0936
Pt    0.5048    0.7949    0.0451
Pt    0.2961    0.0011    0.0482
Pt    0.3402    0.7946    0.1287
Pt    0.2962    0.8369    0.1293
Pt    0.3763    0.0037    0.0489
Pt    0.5042    0.9618    0.0478
Pt    0.4221    0.0042    0.0095
Pt    0.4210    0.8758    0.1297
Pt    0.3781    0.8372    0.1280
Pt    0.4656    0.9619    0.1719
Pt    0.3390    0.8364    0.1720
Pt    0.3375    0.9230    0.1731
Pt    0.4196    0.8368    0.1737
Pt    0.4253    0.9190    0.1726
Pt    0.4666    0.8758    0.1731
Pt    0.3363    0.9642    0.1339
Pt    0.3400    0.7953    0.2160
Pt    0.4636    0.0038    0.2168
Pt    0.3370    0.8795    0.2145
Pt    0.2561    0.8391    0.2542
Pt    0.4658    0.9196    0.1330
Pt    0.3797    0.9640    0.1765
Pt    0.4226    0.8788    0.2164
Pt    0.3812    0.8752    0.1733
Pt    0.4206    0.9615    0.2155
Pt    0.3772    0.7929    0.1683
Pt    0.4642    0.8340    0.1321
Pt    0.2983    0.8365    0.2142
Pt    0.4186    0.7925    0.1321
Pt    0.2558    0.7575    0.2535
Pt    0.3795    0.8393    0.2157
Pt    0.2969    0.8734    0.1718
Pt    0.3810    0.9180    0.2143
Pt    0.4640    0.0036    0.1332
Pt    0.4214    0.0041    0.1737
Pt    0.4641    0.9177    0.2179
Pt    0.2966    0.7931    0.1667
Pt    0.3796    0.0057    0.1332
Pt    0.3801    0.9208    0.1318
Pt    0.2963    0.9235    0.1325
Pt    0.4213    0.9615    0.1324
Pt    0.2957    0.7583    0.2111
Pt    0.3384    0.8821    0.1314
Pt    0.4610    0.9572    0.3374
Pt    0.2998    0.7976    0.2577
Pt    0.4613    0.8750    0.3373
Pt    0.2973    0.7588    0.3003
Pt    0.5029    0.9163    0.3372
Pt    0.4172    0.9185    0.3374
Pt    0.4162    0.9628    0.3770
Pt    0.5045    0.8774    0.2956
Pt    0.4630    0.9606    0.2574
Pt    0.4197    0.9635    0.2994
Pt    0.4201    0.8763    0.3776
Pt    0.4565    0.8362    0.3794
Pt    0.3756    0.9592    0.3353
Pt    0.4635    0.9173    0.2938
Pt    0.4193    0.9208    0.2585
Pt    0.3774    0.0043    0.3796
Pt    0.4616    0.0028    0.2973
Pt    0.3360    0.9647    0.3780
Pt    0.4619    0.9185    0.3792
Pt    0.5036    0.7983    0.3789
Pt    0.4643    0.0040    0.3794
Pt    0.5039    0.0026    0.3380
Pt    0.3756    0.9212    0.3800
Pt    0.5037    0.8788    0.3800
Pt    0.4173    0.0035    0.2564
Pt    0.4624    0.9629    0.4213
Pt    0.3362    0.9207    0.4204
Pt    0.4225    0.7570    0.4117
Pt    0.4164    0.8373    0.4209
Pt    0.4207    0.9199    0.4192
Pt    0.5045    0.8805    0.4644
Pt    0.3386    0.8742    0.4625
Pt    0.3359    0.9629    0.4632
Pt    0.4195    0.7925    0.4604
Pt    0.4188    0.8791    0.4637
Pt    0.4228    0.9641    0.4646
Pt    0.2993    0.9197    0.4613
Pt    0.3788    0.8332    0.4628
Pt    0.3801    0.9209    0.4633
Pt    0.5047    0.7977    0.4647
Pt    0.4601    0.8340    0.4638
Pt    0.4630    0.9197    0.4631
Pt    0.2949    0.9610    0.4165
Pt    0.3800    0.8804    0.4208
Pt    0.3785    0.9633    0.4206
Pt    0.4630    0.7950    0.4179
Pt    0.4610    0.8766    0.4214
Pt    0.2956    0.8774    0.5018
Pt    0.5049    0.8387    0.4216
Pt    0.2566    0.9623    0.4617
Pt    0.2585    0.9182    0.4188
Pt    0.5056    0.7558    0.4148
Pt    0.4628    0.7565    0.4631
Pt    0.5040    0.9628    0.4646
Pt    0.4206    0.7558    0.5048
Pt    0.3784    0.7954    0.5023
Pt    0.3785    0.8793    0.5034
Pt    0.4620    0.8784    0.5039
Pt    0.3347    0.9228    0.5047
Pt    0.4627    0.9604    0.5906
Pt    0.3786    0.9625    0.5939
Pt    0.2925    0.9621    0.5956
Pt    0.4610    0.8349    0.5512
Pt    0.3346    0.9226    0.5899
Pt    0.4605    0.9637    0.5062
Pt    0.2948    0.0042    0.5533
Pt    0.3775    0.9633    0.5077
Pt    0.4202    0.8389    0.5926
Pt    0.4654    0.8777    0.5917
Pt    0.4181    0.9214    0.5924
Pt    0.3801    0.8804    0.5902
Pt    0.3352    0.8781    0.5456
Pt    0.3373    0.9619    0.5488
Pt    0.4178    0.7574    0.5907
Pt    0.4155    0.7946    0.5501
Pt    0.4195    0.8799    0.5463
Pt    0.4596    0.9198    0.5499
Pt    0.4191    0.9619    0.5511
Pt    0.4611    0.7953    0.5944
Pt    0.2936    0.9176    0.5443
Pt    0.3780    0.8391    0.5497
Pt    0.3768    0.9215    0.5473
Pt    0.5025    0.9640    0.5472
Pt    0.4177    0.8361    0.5081
Pt    0.2608    0.9134    0.5925
Pt    0.3383    0.0050    0.5910
Pt    0.5033    0.8772    0.5481
Pt    0.5035    0.9206    0.5085
Pt    0.2946    0.9622    0.5076
Pt    0.2572    0.0050    0.5082
Pt    0.4621    0.7980    0.5078
Pt    0.3376    0.8346    0.5060
Pt    0.4221    0.9214    0.5058
Pt    0.3366    0.0046    0.5058
Pt    0.5049    0.0054    0.5059
Pt    0.4637    0.9626    0.6729
Pt    0.4225    0.9203    0.6733
Pt    0.4658    0.8361    0.6336
Pt    0.4166    0.9614    0.7185
Pt    0.3770    0.9211    0.6343
Pt    0.4611    0.9192    0.7161
Pt    0.3772    0.9653    0.6751
Pt    0.4621    0.8756    0.6750
Pt    0.3351    0.9629    0.6337
Pt    0.2558    0.7990    0.7123
Pt    0.4217    0.9641    0.6320
Pt    0.4645    0.9187    0.6342
Pt    0.4216    0.8792    0.6342
Pt    0.5019    0.0047    0.7534
Pt    0.2972    0.8017    0.7525
Pt    0.5045    0.9584    0.7125
Pt    0.4606    0.9627    0.7551
Pt    0.3768    0.0052    0.7148
Pt    0.5047    0.8378    0.6764
Pt    0.3363    0.7589    0.7492
Pt    0.5048    0.9184    0.6738
Pt    0.5034    0.9628    0.6330
Pt    0.3359    0.0042    0.6726
Pt    0.4622    0.9628    0.8377
Pt    0.5041    0.9637    0.7965
Pt    0.4651    0.8780    0.8342
Pt    0.4186    0.7906    0.8762
Pt    0.3385    0.8377    0.8380
Pt    0.3351    0.9184    0.8331
Pt    0.4220    0.8390    0.8349
Pt    0.4619    0.9209    0.8793
Pt    0.4209    0.9214    0.8355
Pt    0.3780    0.9632    0.8351
Pt    0.3390    0.7961    0.7962
Pt    0.3783    0.8795    0.8347
Pt    0.3392    0.8818    0.7910
Pt    0.4605    0.9245    0.7951
Pt    0.3787    0.7980    0.8369
Pt    0.2949    0.8366    0.8790
Pt    0.4218    0.8787    0.7937
Pt    0.2946    0.8752    0.8368
Pt    0.4195    0.9661    0.7978
Pt    0.2994    0.9171    0.8778
Pt    0.3786    0.9221    0.7950
Pt    0.3003    0.8390    0.7951
Pt    0.2973    0.7558    0.7932
Pt    0.3745    0.0046    0.8754
Pt    0.3778    0.8396    0.7955
Pt    0.2964    0.7981    0.8354
Pt    0.4237    0.8788    0.8778
Pt    0.3796    0.9210    0.8760
Pt    0.5022    0.9175    0.7568
Pt    0.4633    0.8343    0.8727
Pt    0.3380    0.9611    0.8775
Pt    0.5041    0.8791    0.8765
Pt    0.3817    0.8369    0.8789
Pt    0.3355    0.7968    0.8792
Pt    0.4151    0.0027    0.7576
Pt    0.3407    0.8768    0.8772
Pt    0.5050    0.9668    0.8781
Pt    0.4171    0.9210    0.7562
Pt    0.4655    0.7565    0.9617
Pt    0.3387    0.8348    0.9219
Pt    0.3356    0.9185    0.9207
Pt    0.5052    0.7943    0.9626
Pt    0.4209    0.8365    0.9185
Pt    0.4211    0.9223    0.9211
Pt    0.4643    0.9628    0.9236
Pt    0.3329    0.8729    0.9638
Pt    0.3367    0.9611    0.9618
Pt    0.4190    0.7939    0.9639
Pt    0.4209    0.8769    0.9631
Pt    0.4182    0.9631    0.9648
Pt    0.2932    0.9183    0.9628
Pt    0.3783    0.8357    0.9606
Pt    0.3759    0.9186    0.9654
Pt    0.3392    0.0023    0.9172
Pt    0.4629    0.8326    0.9632
Pt    0.4603    0.9215    0.9654
Pt    0.2920    0.8762    0.9212
Pt    0.2969    0.9607    0.9180
Pt    0.3785    0.7937    0.9189
Pt    0.3784    0.8799    0.9226
Pt    0.3812    0.9638    0.9204
Pt    0.4599    0.7944    0.9164
Pt    0.4634    0.8802    0.9241
Pt    0.4999    0.8346    0.9168
Pt    0.3355    0.9170    0.0041
Pt    0.2579    0.0015    0.9126
Pt    0.4213    0.9634    0.8823
Pt    0.4178    0.8336    0.0043
Pt    0.2952    0.0044    0.9641
Pt    0.4633    0.9609    0.0054
Pt    0.5043    0.9191    0.0033
Pt    0.4622    0.8742    0.0052
Pt    0.4628    0.0045    0.8812
Pt    0.5049    0.7573    0.9149
Pt    0.4191    0.9197    0.0051
Pt    0.4620    0.7952    0.0049
Pt    0.2963    0.9608    0.0046
Pt    0.7155    0.1348    0.0913
Pt    0.7176    0.0480    0.0914
Pt    0.5510    0.2144    0.0099
Pt    0.6357    0.2177    0.0907
Pt    0.6313    0.1336    0.0902
Pt    0.7149    0.0922    0.0497
Pt    0.5491    0.1335    0.0085
Pt    0.6350    0.1781    0.0457
Pt    0.6333    0.0931    0.0461
Pt    0.5924    0.0908    0.0919
Pt    0.5461    0.0467    0.0909
Pt    0.5895    0.1775    0.0911
Pt    0.5472    0.1725    0.0518
Pt    0.5485    0.1294    0.0911
Pt    0.5510    0.0897    0.0497
Pt    0.6744    0.0924    0.0903
Pt    0.6733    0.1753    0.0907
Pt    0.6349    0.0472    0.0904
Pt    0.6738    0.1350    0.0481
Pt    0.5492    0.2186    0.0964
Pt    0.5917    0.0477    0.0501
Pt    0.5928    0.1331    0.0466
Pt    0.5917    0.2126    0.0494
Pt    0.6744    0.0489    0.0483
Pt    0.5534    0.2538    0.0511
Pt    0.7169    0.0078    0.0486
Pt    0.5063    0.1735    0.0083
Pt    0.7546    0.0937    0.0076
Pt    0.5901    0.0910    0.0081
Pt    0.6311    0.0489    0.0067
Pt    0.5057    0.1772    0.0933
Pt    0.5515    0.0485    0.0088
Pt    0.5057    0.0474    0.0462
Pt    0.5072    0.0868    0.0909
Pt    0.5091    0.2553    0.0082
Pt    0.5094    0.2157    0.0508
Pt    0.5077    0.1312    0.0482
Pt    0.7165    0.0918    0.1303
Pt    0.5932    0.2546    0.0928
Pt    0.6762    0.0920    0.0058
Pt    0.6324    0.1741    0.1302
Pt    0.5950    0.1739    0.0060
Pt    0.7188    0.2136    0.1726
Pt    0.7149    0.1305    0.1743
Pt    0.5471    0.1336    0.1794
Pt    0.5909    0.0916    0.1750
Pt    0.5895    0.1743    0.1776
Pt    0.6728    0.0928    0.1746
Pt    0.6742    0.1708    0.1722
Pt    0.6336    0.2125    0.1748
Pt    0.6314    0.1336    0.1753
Pt    0.6344    0.0459    0.1767
Pt    0.5900    0.0467    0.1317
Pt    0.5942    0.0468    0.2157
Pt    0.6278    0.1740    0.2217
Pt    0.5907    0.1332    0.2208
Pt    0.5518    0.0063    0.2150
Pt    0.5477    0.1729    0.1330
Pt    0.5449    0.0899    0.1342
Pt    0.6682    0.1359    0.2165
Pt    0.5059    0.0460    0.1314
Pt    0.6725    0.2122    0.2173
Pt    0.5486    0.0497    0.1758
Pt    0.7162    0.1707    0.2172
Pt    0.7146    0.1704    0.1323
Pt    0.5469    0.0937    0.2177
Pt    0.6333    0.0871    0.1335
Pt    0.5887    0.1310    0.1353
Pt    0.6724    0.1310    0.1315
Pt    0.6328    0.0897    0.2149
Pt    0.6764    0.2152    0.1334
Pt    0.6743    0.2544    0.2552
Pt    0.6773    0.0502    0.1342
Pt    0.7534    0.2521    0.2551
Pt    0.5922    0.2151    0.1353
Pt    0.5066    0.0489    0.2184
Pt    0.5933    0.0072    0.1743
Pt    0.6345    0.0062    0.1320
Pt    0.7125    0.2535    0.2125
Pt    0.7548    0.2553    0.1754
Pt    0.5071    0.0938    0.3354
Pt    0.6342    0.0477    0.3328
Pt    0.5495    0.1336    0.3348
Pt    0.5495    0.0498    0.3385
Pt    0.7117    0.2095    0.2616
Pt    0.6341    0.0895    0.3792
Pt    0.5924    0.0485    0.2968
Pt    0.5073    0.1337    0.2958
Pt    0.5948    0.0930    0.3365
Pt    0.7109    0.2538    0.2998
Pt    0.5502    0.0925    0.2947
Pt    0.5109    0.2142    0.3758
Pt    0.5072    0.0495    0.2969
Pt    0.5082    0.0500    0.3776
Pt    0.5507    0.0932    0.3754
Pt    0.5930    0.1342    0.3769
Pt    0.6715    0.0439    0.3772
Pt    0.5944    0.0870    0.2574
Pt    0.5081    0.1320    0.3768
Pt    0.7524    0.2098    0.3038
Pt    0.5905    0.0480    0.3793
Pt    0.7514    0.2548    0.3385
Pt    0.5494    0.1744    0.3743
Pt    0.5491    0.0472    0.2586
Pt    0.5953    0.0082    0.2577
Pt    0.5061    0.0927    0.2582
Pt    0.5479    0.0064    0.3780
Pt    0.7136    0.0499    0.4160
Pt    0.6312    0.1321    0.4192
Pt    0.6322    0.0474    0.4222
Pt    0.5479    0.2550    0.4630
Pt    0.5892    0.0919    0.4204
Pt    0.5898    0.1722    0.4228
Pt    0.7125    0.0927    0.4626
Pt    0.6751    0.0937    0.4190
Pt    0.5489    0.2135    0.4169
Pt    0.5493    0.1320    0.4191
Pt    0.5491    0.0504    0.4214
Pt    0.5915    0.0485    0.4633
Pt    0.5891    0.1322    0.4637
Pt    0.5949    0.2136    0.4615
Pt    0.6717    0.0493    0.4616
Pt    0.6744    0.1319    0.4614
Pt    0.6354    0.1727    0.4626
Pt    0.5491    0.0894    0.4657
Pt    0.5500    0.1751    0.4655
Pt    0.6338    0.0917    0.4627
Pt    0.5067    0.0916    0.4219
Pt    0.5073    0.0455    0.4647
Pt    0.7531    0.0915    0.4227
Pt    0.7523    0.0080    0.4204
Pt    0.5476    0.0065    0.4661
Pt    0.7121    0.0072    0.4610
Pt    0.6319    0.0077    0.4646
Pt    0.7512    0.0506    0.4646
Pt    0.6732    0.1730    0.5053
Pt    0.5071    0.2130    0.4635
Pt    0.5088    0.1737    0.4190
Pt    0.6329    0.2144    0.5027
Pt    0.7506    0.0070    0.5043
Pt    0.5912    0.1739    0.5051
Pt    0.7541    0.0964    0.5061
Pt    0.7145    0.0488    0.5968
Pt    0.6300    0.0911    0.5502
Pt    0.5487    0.1739    0.5488
Pt    0.6317    0.1339    0.5908
Pt    0.5493    0.0910    0.5484
Pt    0.6338    0.1336    0.5077
Pt    0.5475    0.0482    0.5940
Pt    0.6371    0.1752    0.5487
Pt    0.5907    0.0907    0.5919
Pt    0.6782    0.1341    0.5517
Pt    0.5958    0.1771    0.5893
Pt    0.6718    0.0501    0.5501
Pt    0.7135    0.0897    0.5500
Pt    0.5931    0.2168    0.5456
Pt    0.6741    0.0931    0.5919
Pt    0.5922    0.1348    0.5469
Pt    0.6323    0.0469    0.5930
Pt    0.5883    0.0474    0.5490
Pt    0.5503    0.2138    0.5907
Pt    0.5494    0.1310    0.5893
Pt    0.7168    0.0059    0.5496
Pt    0.5919    0.0060    0.5070
Pt    0.5072    0.0898    0.5068
Pt    0.5089    0.0479    0.5472
Pt    0.7537    0.0882    0.5898
Pt    0.5946    0.2557    0.5904
Pt    0.6319    0.0065    0.5470
Pt    0.6719    0.0941    0.5061
Pt    0.5926    0.0914    0.5063
Pt    0.7539    0.0490    0.5489
Pt    0.5487    0.0472    0.5070
Pt    0.5480    0.2553    0.5486
Pt    0.7133    0.1341    0.5068
Pt    0.5058    0.0065    0.5912
Pt    0.5482    0.1333    0.5069
Pt    0.5476    0.2154    0.5081
Pt    0.6330    0.0495    0.5060
Pt    0.7109    0.0518    0.5063
Pt    0.6328    0.0508    0.6757
Pt    0.5502    0.1370    0.6799
Pt    0.5460    0.0501    0.6751
Pt    0.5105    0.1763    0.6698
Pt    0.5901    0.0896    0.6739
Pt    0.5911    0.0479    0.7150
Pt    0.5471    0.0941    0.7158
Pt    0.6715    0.0474    0.6355
Pt    0.5062    0.0494    0.6344
Pt    0.5461    0.0938    0.6354
Pt    0.6332    0.0926    0.6337
Pt    0.5885    0.0479    0.6326
Pt    0.7528    0.2142    0.7181
Pt    0.5095    0.2179    0.6313
Pt    0.5064    0.0069    0.6756
Pt    0.5885    0.1333    0.6327
Pt    0.5950    0.0906    0.7539
Pt    0.7546    0.2520    0.6749
Pt    0.5905    0.0071    0.6740
Pt    0.5471    0.0512    0.7532
Pt    0.6725    0.0071    0.6759
Pt    0.7525    0.1701    0.7553
Pt    0.5509    0.1732    0.6311
Pt    0.7139    0.2156    0.8409
Pt    0.6364    0.1738    0.7967
Pt    0.7170    0.1311    0.8368
Pt    0.6323    0.2142    0.8375
Pt    0.6712    0.0479    0.8790
Pt    0.5483    0.0484    0.8367
Pt    0.5473    0.1752    0.8775
Pt    0.5885    0.0928    0.8376
Pt    0.5898    0.1768    0.8362
Pt    0.6722    0.0906    0.8408
Pt    0.6750    0.1736    0.8407
Pt    0.6324    0.1340    0.8383
Pt    0.6282    0.0497    0.8390
Pt    0.5460    0.1358    0.8362
Pt    0.5875    0.0533    0.7965
Pt    0.5069    0.0920    0.8399
Pt    0.5883    0.1338    0.7961
Pt    0.5492    0.0082    0.7944
Pt    0.7144    0.2549    0.7993
Pt    0.5940    0.0067    0.7577
Pt    0.6736    0.1317    0.7968
Pt    0.5906    0.2140    0.8759
Pt    0.6727    0.2173    0.7988
Pt    0.7133    0.1739    0.7967
Pt    0.6311    0.0925    0.7956
Pt    0.5460    0.0925    0.7946
Pt    0.7197    0.0932    0.8782
Pt    0.7540    0.2152    0.7962
Pt    0.7084    0.2149    0.7563
Pt    0.6720    0.2166    0.8783
Pt    0.5492    0.0908    0.8783
Pt    0.6302    0.0924    0.8786
Pt    0.5067    0.0491    0.8793
Pt    0.7158    0.1726    0.8787
Pt    0.5890    0.1351    0.8800
Pt    0.7201    0.1337    0.9230
Pt    0.7151    0.0488    0.9178
Pt    0.6336    0.2182    0.9195
Pt    0.5063    0.0479    0.9651
Pt    0.5923    0.0938    0.9222
Pt    0.5901    0.1756    0.9205
Pt    0.5466    0.1329    0.9228
Pt    0.6758    0.0910    0.9211
Pt    0.6781    0.1774    0.9221
Pt    0.6350    0.1340    0.9256
Pt    0.6328    0.0508    0.9221
Pt    0.5484    0.2145    0.9198
Pt    0.5898    0.0472    0.9659
Pt    0.5936    0.1362    0.9644
Pt    0.5941    0.2145    0.9639
Pt    0.6724    0.0465    0.9624
Pt    0.6768    0.1335    0.9624
Pt    0.5481    0.0497    0.9241
Pt    0.5466    0.0922    0.9648
Pt    0.5503    0.1766    0.9644
Pt    0.7148    0.0903    0.9592
Pt    0.6339    0.0898    0.9648
Pt    0.6398    0.1791    0.9673
Pt    0.7536    0.0065    0.9174
Pt    0.6741    0.1322    0.8820
Pt    0.5087    0.2159    0.9666
Pt    0.5905    0.0065    0.9208
Pt    0.5057    0.1732    0.9245
Pt    0.5512    0.0082    0.9648
Pt    0.5058    0.2540    0.9250
Pt    0.5490    0.2538    0.9642
Pt    0.6334    0.1727    0.8808
Pt    0.5057    0.0876    0.9226
Pt    0.6370    0.1351    0.0033
Pt    0.7145    0.0491    0.0020
Pt    0.5961    0.2517    0.0040
Pt    0.5895    0.0475    0.8811
Pt    0.6725    0.0066    0.0050
Pt    0.7140    0.4619    0.0895
Pt    0.5069    0.4640    0.0464
Pt    0.5504    0.3368    0.0481
Pt    0.6334    0.4684    0.0900
Pt    0.5911    0.3372    0.0070
Pt    0.6348    0.3803    0.0925
Pt    0.5491    0.4217    0.0484
Pt    0.6350    0.2934    0.0079
Pt    0.6297    0.4626    0.0062
Pt    0.5966    0.3382    0.0936
Pt    0.5522    0.3764    0.0904
Pt    0.5902    0.4236    0.0903
Pt    0.5529    0.2973    0.0935
Pt    0.7167    0.4163    0.0499
Pt    0.6741    0.4179    0.0908
Pt    0.6312    0.4207    0.0490
Pt    0.6349    0.3376    0.0496
Pt    0.5485    0.4636    0.0904
Pt    0.5944    0.2971    0.0508
Pt    0.5906    0.3804    0.0483
Pt    0.5887    0.4662    0.0483
Pt    0.6735    0.3800    0.0499
Pt    0.6736    0.4645    0.0465
Pt    0.5076    0.4196    0.0886
Pt    0.7542    0.4213    0.0905
Pt    0.6726    0.4211    0.0071
Pt    0.7542    0.4620    0.0506
Pt    0.5094    0.2962    0.0516
Pt    0.5070    0.3798    0.0481
Pt    0.5074    0.2567    0.0946
Pt    0.5525    0.2927    0.0093
Pt    0.6327    0.3810    0.0100
Pt    0.5091    0.3394    0.0059
Pt    0.5067    0.5042    0.0898
Pt    0.5094    0.2986    0.1305
Pt    0.6721    0.3392    0.0059
Pt    0.6329    0.4636    0.1759
Pt    0.5496    0.4634    0.1764
Pt    0.5897    0.4232    0.1736
Pt    0.5497    0.3801    0.1750
Pt    0.5900    0.4653    0.1322
Pt    0.5071    0.4639    0.1359
Pt    0.5507    0.4195    0.2163
Pt    0.6346    0.5056    0.1333
Pt    0.5487    0.3405    0.1339
Pt    0.5929    0.3832    0.1331
Pt    0.5930    0.4626    0.2169
Pt    0.5082    0.3403    0.1744
Pt    0.6337    0.4251    0.1326
Pt    0.5060    0.4645    0.2129
Pt    0.7107    0.2987    0.2526
Pt    0.5486    0.4229    0.1318
Pt    0.6757    0.4630    0.1340
Pt    0.5924    0.5046    0.1731
Pt    0.7533    0.2999    0.2158
Pt    0.5955    0.4198    0.2547
Pt    0.5062    0.3796    0.1314
Pt    0.6350    0.5043    0.2172
Pt    0.7128    0.3804    0.3297
Pt    0.7123    0.2956    0.3379
Pt    0.5868    0.3376    0.3355
Pt    0.5437    0.3751    0.3323
Pt    0.5878    0.4210    0.3348
Pt    0.6693    0.2969    0.3760
Pt    0.6693    0.3391    0.3360
Pt    0.6735    0.4221    0.3370
Pt    0.5065    0.4656    0.2950
Pt    0.6334    0.4655    0.3379
Pt    0.6325    0.3818    0.3340
Pt    0.5087    0.4209    0.3358
Pt    0.5902    0.3794    0.2930
Pt    0.5875    0.3775    0.3757
Pt    0.5911    0.4632    0.2942
Pt    0.5492    0.4232    0.3774
Pt    0.6725    0.2926    0.2959
Pt    0.6743    0.3780    0.3791
Pt    0.6711    0.3813    0.2921
Pt    0.6295    0.2978    0.3358
Pt    0.5906    0.4623    0.3776
Pt    0.5864    0.2935    0.3764
Pt    0.5495    0.4192    0.2937
Pt    0.7065    0.3383    0.2921
Pt    0.6336    0.3381    0.2931
Pt    0.5485    0.4647    0.3353
Pt    0.6340    0.4238    0.2955
Pt    0.5442    0.3344    0.3777
Pt    0.7170    0.3417    0.3716
Pt    0.6267    0.3371    0.3779
Pt    0.6308    0.4203    0.3769
Pt    0.6721    0.4644    0.3791
Pt    0.7137    0.4185    0.3781
Pt    0.7542    0.3416    0.2581
Pt    0.5068    0.3763    0.3755
Pt    0.7504    0.2948    0.2932
Pt    0.5081    0.4191    0.2566
Pt    0.5471    0.4631    0.2558
Pt    0.5945    0.5052    0.2560
Pt    0.7173    0.4617    0.4180
Pt    0.7168    0.3776    0.4205
Pt    0.6321    0.4603    0.4226
Pt    0.7521    0.5048    0.4117
Pt    0.5878    0.3378    0.4189
Pt    0.5897    0.4203    0.4203
Pt    0.6731    0.3317    0.4190
Pt    0.6722    0.4205    0.4188
Pt    0.6325    0.3787    0.4196
Pt    0.6295    0.2977    0.4192
Pt    0.5470    0.4656    0.4185
Pt    0.5914    0.2964    0.4654
Pt    0.5902    0.3796    0.4634
Pt    0.5890    0.4650    0.4620
Pt    0.6763    0.3767    0.4604
Pt    0.6756    0.4627    0.4623
Pt    0.7178    0.5037    0.4571
Pt    0.5492    0.3361    0.4656
Pt    0.5480    0.4194    0.4643
Pt    0.6357    0.3350    0.4597
Pt    0.6333    0.4205    0.4630
Pt    0.7164    0.4191    0.4592
Pt    0.5453    0.2955    0.4167
Pt    0.5492    0.3794    0.4161
Pt    0.5902    0.4239    0.5036
Pt    0.5088    0.3796    0.4597
Pt    0.5911    0.2562    0.5017
Pt    0.5090    0.2958    0.4620
Pt    0.6372    0.4644    0.5022
Pt    0.6301    0.5056    0.4619
Pt    0.5097    0.4215    0.4219
Pt    0.5488    0.3778    0.5044
Pt    0.6336    0.3773    0.5031
Pt    0.6786    0.4200    0.5023
Pt    0.5457    0.4631    0.5032
Pt    0.5895    0.2559    0.4250
Pt    0.5081    0.2564    0.4172
Pt    0.7150    0.4646    0.5920
Pt    0.5074    0.3762    0.5487
Pt    0.7177    0.3758    0.5910
Pt    0.6348    0.4624    0.5921
Pt    0.5472    0.2946    0.5070
Pt    0.6358    0.3782    0.5885
Pt    0.5915    0.5035    0.5873
Pt    0.5067    0.3377    0.5066
Pt    0.5490    0.3345    0.5497
Pt    0.5927    0.3376    0.5881
Pt    0.6762    0.3776    0.5454
Pt    0.5930    0.4208    0.5871
Pt    0.6786    0.3346    0.5861
Pt    0.6752    0.4641    0.5439
Pt    0.6757    0.4198    0.5891
Pt    0.5523    0.2929    0.5903
Pt    0.6352    0.2971    0.5916
Pt    0.5473    0.4626    0.5884
Pt    0.7171    0.4225    0.5488
Pt    0.5472    0.3788    0.5877
Pt    0.5953    0.2927    0.5468
Pt    0.6364    0.4202    0.5425
Pt    0.5958    0.3803    0.5482
Pt    0.6355    0.3343    0.5473
Pt    0.5910    0.4606    0.5482
Pt    0.5478    0.4191    0.5460
Pt    0.5925    0.3356    0.5071
Pt    0.5061    0.3774    0.6303
Pt    0.5505    0.4204    0.6297
Pt    0.5059    0.4224    0.5905
Pt    0.5903    0.3791    0.6297
Pt    0.5077    0.2563    0.5917
Pt    0.7159    0.4641    0.5057
Pt    0.5893    0.5022    0.5085
Pt    0.6337    0.5009    0.5467
Pt    0.5460    0.5040    0.5468
Pt    0.6787    0.2984    0.6304
Pt    0.7553    0.5035    0.5916
Pt    0.7143    0.4203    0.6306
Pt    0.6770    0.3761    0.6296
Pt    0.5528    0.3367    0.6287
Pt    0.5079    0.4630    0.6303
Pt    0.7531    0.4197    0.5061
Pt    0.7168    0.3825    0.6758
Pt    0.5906    0.3367    0.6739
Pt    0.5918    0.4236    0.6706
Pt    0.6771    0.3412    0.6730
Pt    0.6776    0.4221    0.6752
Pt    0.7174    0.2960    0.6753
Pt    0.5904    0.3800    0.7137
Pt    0.5875    0.4620    0.7143
Pt    0.6730    0.2990    0.7139
Pt    0.6760    0.3801    0.7143
Pt    0.5466    0.4197    0.7108
Pt    0.6330    0.3422    0.7150
Pt    0.6320    0.4246    0.7154
Pt    0.6342    0.4670    0.6751
Pt    0.7159    0.3380    0.7169
Pt    0.5470    0.3784    0.6716
Pt    0.5481    0.4659    0.6717
Pt    0.6385    0.2999    0.6725
Pt    0.6317    0.3792    0.6723
Pt    0.5065    0.4185    0.7525
Pt    0.6368    0.4197    0.6337
Pt    0.5066    0.4626    0.7128
Pt    0.5912    0.5054    0.7519
Pt    0.5946    0.2935    0.6347
Pt    0.5901    0.4636    0.6308
Pt    0.6761    0.4635    0.6340
Pt    0.7160    0.2583    0.7190
Pt    0.6354    0.3367    0.6319
Pt    0.7223    0.3381    0.6364
Pt    0.5869    0.4187    0.7555
Pt    0.7544    0.3404    0.7551
Pt    0.5454    0.4618    0.7547
Pt    0.5897    0.5050    0.8363
Pt    0.6332    0.4609    0.8374
Pt    0.5471    0.4630    0.8391
Pt    0.7096    0.3019    0.7613
Pt    0.5872    0.4178    0.8385
Pt    0.5897    0.4638    0.8797
Pt    0.6319    0.4226    0.8793
Pt    0.5498    0.3735    0.8368
Pt    0.6327    0.5024    0.8794
Pt    0.5431    0.4172    0.7968
Pt    0.7552    0.2603    0.7588
Pt    0.6709    0.2606    0.7595
Pt    0.5884    0.4603    0.7955
Pt    0.6757    0.4620    0.8770
Pt    0.6301    0.5029    0.7961
Pt    0.5061    0.4626    0.7971
Pt    0.7527    0.2992    0.7976
Pt    0.5499    0.3364    0.8804
Pt    0.5932    0.3774    0.8805
Pt    0.7161    0.4656    0.9181
Pt    0.6336    0.4625    0.9215
Pt    0.6336    0.3817    0.9229
Pt    0.7162    0.3772    0.0032
Pt    0.5948    0.3350    0.9225
Pt    0.5914    0.4204    0.9213
Pt    0.6745    0.4227    0.9205
Pt    0.5493    0.4644    0.9168
Pt    0.5467    0.3769    0.9231
Pt    0.5483    0.2963    0.9251
Pt    0.5921    0.2950    0.9667
Pt    0.5924    0.3809    0.9643
Pt    0.5903    0.4671    0.9618
Pt    0.6741    0.3776    0.9634
Pt    0.6731    0.4644    0.9625
Pt    0.7531    0.4205    0.9180
Pt    0.5498    0.3362    0.9640
Pt    0.5475    0.4233    0.9631
Pt    0.6321    0.3369    0.9644
Pt    0.6331    0.4224    0.9646
Pt    0.7158    0.4191    0.9608
Pt    0.7529    0.4649    0.9635
Pt    0.5900    0.2567    0.9204
Pt    0.5474    0.4196    0.8819
Pt    0.5059    0.2943    0.9659
Pt    0.5073    0.2938    0.8831
Pt    0.7155    0.4601    0.0052
Pt    0.5881    0.4233    0.0054
Pt    0.5480    0.4654    0.0031
Pt    0.5495    0.3801    0.0037
Pt    0.5092    0.4244    0.0041
Pt    0.5073    0.5944    0.0921
Pt    0.7140    0.5504    0.0917
Pt    0.7142    0.5916    0.0521
Pt    0.6342    0.6748    0.0485
Pt    0.6347    0.6369    0.0901
Pt    0.6334    0.5935    0.0503
Pt    0.5934    0.5528    0.0480
Pt    0.5475    0.6777    0.0459
Pt    0.5475    0.5941    0.0483
Pt    0.5910    0.5952    0.0908
Pt    0.5492    0.5501    0.0900
Pt    0.5909    0.6785    0.0888
Pt    0.5499    0.6348    0.0908
Pt    0.6774    0.6328    0.0484
Pt    0.6745    0.5503    0.0480
Pt    0.6738    0.5940    0.0931
Pt    0.5907    0.7168    0.0458
Pt    0.6333    0.5498    0.0896
Pt    0.5927    0.6356    0.0481
Pt    0.5474    0.7182    0.0886
Pt    0.5463    0.5079    0.0456
Pt    0.7545    0.5902    0.0960
Pt    0.5888    0.7554    0.0918
Pt    0.5073    0.6346    0.0471
Pt    0.6328    0.5067    0.0460
Pt    0.5912    0.5085    0.0898
Pt    0.7151    0.5077    0.0527
Pt    0.5061    0.6751    0.0928
Pt    0.7169    0.5511    0.0074
Pt    0.6731    0.5080    0.0905
Pt    0.5070    0.7518    0.0064
Pt    0.6766    0.5085    0.0056
Pt    0.6366    0.5517    0.1769
Pt    0.5489    0.6371    0.1748
Pt    0.5493    0.5532    0.1720
Pt    0.5081    0.5987    0.2543
Pt    0.5953    0.5951    0.1731
Pt    0.5528    0.5954    0.2124
Pt    0.5509    0.5076    0.2157
Pt    0.5074    0.5091    0.2546
Pt    0.5061    0.5927    0.1730
Pt    0.5082    0.5128    0.1743
Pt    0.5914    0.5502    0.2121
Pt    0.7116    0.7524    0.2127
Pt    0.5108    0.5535    0.2151
Pt    0.6333    0.5918    0.1314
Pt    0.7149    0.5076    0.1317
Pt    0.6754    0.5498    0.1325
Pt    0.5934    0.5496    0.1328
Pt    0.6723    0.5064    0.1744
Pt    0.5915    0.6382    0.1326
Pt    0.5072    0.6375    0.2149
Pt    0.5488    0.5065    0.1327
Pt    0.5541    0.5948    0.1331
Pt    0.5480    0.6794    0.1326
Pt    0.5075    0.6363    0.1364
Pt    0.7529    0.6751    0.2514
Pt    0.7171    0.7129    0.3376
Pt    0.6338    0.6735    0.2947
Pt    0.7177    0.6318    0.3321
Pt    0.6325    0.7148    0.3336
Pt    0.5885    0.7155    0.3781
Pt    0.5459    0.5511    0.3362
Pt    0.7184    0.6738    0.3746
Pt    0.5902    0.5915    0.3365
Pt    0.5884    0.6746    0.3343
Pt    0.6751    0.5927    0.3364
Pt    0.6740    0.6739    0.3390
Pt    0.6327    0.6328    0.3361
Pt    0.6356    0.5492    0.3362
Pt    0.5522    0.6346    0.3367
Pt    0.5948    0.5489    0.2957
Pt    0.6323    0.5909    0.2970
Pt    0.5927    0.6339    0.2949
Pt    0.6767    0.5479    0.3744
Pt    0.5891    0.5533    0.3771
Pt    0.6322    0.5933    0.3763
Pt    0.6745    0.6321    0.2945
Pt    0.5533    0.5093    0.2964
Pt    0.6779    0.7151    0.2971
Pt    0.7148    0.6732    0.2935
Pt    0.6758    0.6331    0.3796
Pt    0.5470    0.5090    0.3788
Pt    0.5494    0.5957    0.2949
Pt    0.5463    0.5943    0.3783
Pt    0.7184    0.7180    0.2567
Pt    0.6322    0.6770    0.3772
Pt    0.7191    0.5897    0.3756
Pt    0.6762    0.7201    0.3773
Pt    0.5913    0.5065    0.3400
Pt    0.6321    0.5081    0.3783
Pt    0.5069    0.5068    0.3345
Pt    0.5073    0.5551    0.2942
Pt    0.5931    0.5894    0.2557
Pt    0.5512    0.5495    0.2560
Pt    0.7157    0.6375    0.4212
Pt    0.7155    0.5493    0.4181
Pt    0.6332    0.7178    0.4188
Pt    0.5890    0.5073    0.4198
Pt    0.5922    0.5916    0.4203
Pt    0.5909    0.6749    0.4220
Pt    0.5472    0.6334    0.4194
Pt    0.6760    0.5913    0.4211
Pt    0.6770    0.6785    0.4186
Pt    0.6340    0.6328    0.4214
Pt    0.6355    0.5480    0.4174
Pt    0.5489    0.7181    0.4225
Pt    0.5928    0.5482    0.4603
Pt    0.5923    0.6345    0.4642
Pt    0.5895    0.7145    0.4640
Pt    0.6758    0.5506    0.4633
Pt    0.6760    0.6368    0.4654
Pt    0.5480    0.5525    0.4205
Pt    0.5512    0.5916    0.4623
Pt    0.5473    0.6747    0.4631
Pt    0.7174    0.5966    0.4616
Pt    0.6346    0.5946    0.4637
Pt    0.6314    0.6775    0.4644
Pt    0.6750    0.5068    0.4189
Pt    0.5452    0.5098    0.4632
Pt    0.5917    0.6331    0.3817
Pt    0.6787    0.5929    0.5050
Pt    0.6783    0.5064    0.5024
Pt    0.7552    0.5508    0.4645
Pt    0.5934    0.5914    0.5049
Pt    0.5066    0.5514    0.4630
Pt    0.6334    0.5481    0.5025
Pt    0.5057    0.5065    0.5050
Pt    0.5057    0.7184    0.4647
Pt    0.5931    0.7529    0.5035
Pt    0.5472    0.6738    0.3819
Pt    0.7190    0.6320    0.5912
Pt    0.7170    0.5485    0.5879
Pt    0.5065    0.5895    0.5888
Pt    0.6330    0.7164    0.5909
Pt    0.6347    0.6326    0.5885
Pt    0.6355    0.6772    0.5476
Pt    0.5946    0.6323    0.5466
Pt    0.6348    0.5897    0.5461
Pt    0.7175    0.5941    0.5450
Pt    0.5940    0.5895    0.5878
Pt    0.5503    0.6733    0.5496
Pt    0.5922    0.6738    0.5898
Pt    0.5486    0.5903    0.5467
Pt    0.5492    0.5473    0.5870
Pt    0.6775    0.6341    0.5475
Pt    0.6750    0.5898    0.5876
Pt    0.6787    0.6744    0.5901
Pt    0.6338    0.5471    0.5885
Pt    0.6731    0.5492    0.5459
Pt    0.5505    0.7127    0.5895
Pt    0.5966    0.7160    0.5455
Pt    0.5504    0.6328    0.5882
Pt    0.5910    0.5478    0.5469
Pt    0.5058    0.5060    0.5905
Pt    0.5063    0.6330    0.5496
Pt    0.5058    0.5472    0.5490
Pt    0.5499    0.5487    0.5056
Pt    0.6760    0.6326    0.6287
Pt    0.5497    0.6313    0.5068
Pt    0.5495    0.7549    0.5476
Pt    0.6336    0.5865    0.6305
Pt    0.5880    0.5458    0.6302
Pt    0.6338    0.6751    0.6292
Pt    0.5113    0.7545    0.5958
Pt    0.6757    0.5467    0.6304
Pt    0.7173    0.5068    0.5478
Pt    0.5513    0.5912    0.6288
Pt    0.5920    0.6714    0.5080
Pt    0.5486    0.7125    0.5068
Pt    0.6759    0.5058    0.5894
Pt    0.6371    0.6351    0.5064
Pt    0.7149    0.5504    0.5060
Pt    0.5059    0.6740    0.5083
Pt    0.5057    0.7146    0.5507
Pt    0.7178    0.5875    0.6300
Pt    0.5489    0.5058    0.6304
Pt    0.7168    0.7145    0.6719
Pt    0.7171    0.6328    0.6701
Pt    0.6307    0.6307    0.6709
Pt    0.5911    0.5889    0.6708
Pt    0.5905    0.6735    0.6716
Pt    0.6768    0.5907    0.6717
Pt    0.6751    0.6741    0.6714
Pt    0.6316    0.7172    0.6727
Pt    0.5911    0.5501    0.7145
Pt    0.5907    0.6302    0.7154
Pt    0.6737    0.6304    0.7110
Pt    0.6726    0.7134    0.7143
Pt    0.6376    0.5450    0.6745
Pt    0.5459    0.5927    0.7179
Pt    0.6323    0.5898    0.7133
Pt    0.6323    0.6707    0.7120
Pt    0.7137    0.6727    0.7137
Pt    0.5486    0.5533    0.6732
Pt    0.5476    0.6305    0.6732
Pt    0.5064    0.6353    0.6324
Pt    0.7168    0.6743    0.6322
Pt    0.5913    0.5066    0.6754
Pt    0.6735    0.7189    0.6308
Pt    0.5464    0.6752    0.6335
Pt    0.5477    0.5460    0.7540
Pt    0.5904    0.7146    0.6312
Pt    0.7140    0.7164    0.7528
Pt    0.5075    0.5480    0.6310
Pt    0.5461    0.5074    0.7137
Pt    0.5923    0.6335    0.6310
Pt    0.6327    0.5070    0.6310
Pt    0.7537    0.6742    0.7596
Pt    0.6337    0.5478    0.8348
Pt    0.5517    0.6336    0.8354
Pt    0.5465    0.5470    0.8352
Pt    0.5927    0.6323    0.8773
Pt    0.6755    0.5525    0.8738
Pt    0.5925    0.5506    0.7942
Pt    0.5917    0.5465    0.8769
Pt    0.5903    0.5883    0.8377
Pt    0.7556    0.7154    0.7963
Pt    0.5486    0.5922    0.7965
Pt    0.5490    0.6750    0.8723
Pt    0.6321    0.5915    0.8773
Pt    0.5064    0.6333    0.8771
Pt    0.5488    0.5901    0.8780
Pt    0.7117    0.5080    0.8767
Pt    0.5902    0.5903    0.7569
Pt    0.6723    0.5064    0.8373
Pt    0.5090    0.6303    0.7945
Pt    0.5059    0.7141    0.8750
Pt    0.5465    0.5065    0.8778
Pt    0.5495    0.5072    0.7961
Pt    0.7150    0.5501    0.9162
Pt    0.6347    0.6323    0.9190
Pt    0.6343    0.5494    0.9160
Pt    0.5968    0.7557    0.0018
Pt    0.5909    0.5899    0.9184
Pt    0.5923    0.6745    0.9143
Pt    0.7156    0.5897    0.9627
Pt    0.6753    0.5930    0.9159
Pt    0.5502    0.7143    0.9160
Pt    0.5482    0.6334    0.9190
Pt    0.5458    0.5471    0.9197
Pt    0.5928    0.5488    0.9599
Pt    0.5908    0.6317    0.9613
Pt    0.5933    0.7152    0.9593
Pt    0.6763    0.5510    0.9613
Pt    0.6761    0.6338    0.9577
Pt    0.6328    0.6736    0.9589
Pt    0.5473    0.5902    0.9622
Pt    0.5514    0.6730    0.9597
Pt    0.6360    0.5930    0.9604
Pt    0.5087    0.6757    0.0055
Pt    0.6308    0.6312    0.0031
Pt    0.7139    0.6326    0.0009
Pt    0.5917    0.6725    0.0046
Pt    0.5064    0.6757    0.9182
Pt    0.7151    0.5077    0.9593
Pt    0.6328    0.7126    0.0024
Pt    0.6738    0.5910    0.0038
Pt    0.5442    0.5487    0.0053
Pt    0.5484    0.6326    0.0052
Pt    0.6744    0.6727    0.0033
Pt    0.6358    0.5075    0.9606
Pt    0.5901    0.5080    0.9206
Pt    0.5524    0.7180    0.0027
Pt    0.5870    0.5086    0.0051
Pt    0.5466    0.7551    0.9593
Pt    0.7537    0.5948    0.9194
Pt    0.5068    0.7142    0.9590
Pt    0.5917    0.7525    0.9170
Pt    0.6340    0.5499    0.0043
Pt    0.5454    0.5082    0.9631
Pt    0.6739    0.5068    0.9161
Pt    0.7534    0.5068    0.0047
Pt    0.5894    0.5894    0.0040
Pt    0.7171    0.9666    0.0908
Pt    0.7546    0.9636    0.0493
Pt    0.7201    0.8793    0.0915
Pt    0.6360    0.9623    0.0888
Pt    0.5504    0.7577    0.0466
Pt    0.6339    0.8789    0.0882
Pt    0.5491    0.9184    0.0475
Pt    0.6349    0.0051    0.0492
Pt    0.6325    0.8360    0.0479
Pt    0.5904    0.8342    0.0899
Pt    0.5462    0.7981    0.0918
Pt    0.5945    0.9231    0.0926
Pt    0.6775    0.8324    0.0910
Pt    0.7189    0.9195    0.0481
Pt    0.6782    0.9231    0.0898
Pt    0.5493    0.8775    0.0911
Pt    0.6349    0.7933    0.0880
Pt    0.5465    0.9625    0.0886
Pt    0.5920    0.7955    0.0455
Pt    0.5902    0.8779    0.0485
Pt    0.5932    0.9610    0.0505
Pt    0.6767    0.8767    0.0499
Pt    0.6776    0.9633    0.0477
Pt    0.6345    0.9190    0.0445
Pt    0.5514    0.8341    0.0477
Pt    0.5068    0.8385    0.0869
Pt    0.5069    0.9172    0.0930
Pt    0.5915    0.0036    0.0923
Pt    0.5923    0.0037    0.0088
Pt    0.5473    0.0030    0.0489
Pt    0.5485    0.9634    0.0084
Pt    0.6764    0.0052    0.0918
Pt    0.5072    0.9605    0.1300
Pt    0.6374    0.8763    0.0065
Pt    0.6746    0.8792    0.1299
Pt    0.6356    0.8356    0.1300
Pt    0.5887    0.9196    0.0065
Pt    0.6789    0.9152    0.0085
Pt    0.7541    0.0054    0.0077
Pt    0.5948    0.7952    0.1302
Pt    0.6330    0.9632    0.0056
Pt    0.7151    0.8783    0.1725
Pt    0.5940    0.8325    0.1754
Pt    0.5939    0.9235    0.1745
Pt    0.6756    0.8374    0.1739
Pt    0.6747    0.9188    0.1771
Pt    0.7168    0.7996    0.1717
Pt    0.6380    0.9680    0.1802
Pt    0.6330    0.8779    0.1723
Pt    0.5477    0.0038    0.1353
Pt    0.5908    0.8778    0.1362
Pt    0.5915    0.8779    0.2139
Pt    0.5081    0.9169    0.2534
Pt    0.5913    0.9649    0.2146
Pt    0.5066    0.8766    0.1348
Pt    0.6735    0.7953    0.2130
Pt    0.5925    0.9639    0.1343
Pt    0.6747    0.8790    0.2160
Pt    0.7153    0.9205    0.1344
Pt    0.6744    0.7928    0.1320
Pt    0.5475    0.8372    0.1331
Pt    0.5493    0.9154    0.2158
Pt    0.5485    0.8750    0.1742
Pt    0.6345    0.8399    0.2165
Pt    0.6756    0.9633    0.1357
Pt    0.6322    0.9239    0.2187
Pt    0.6350    0.7942    0.1730
Pt    0.5481    0.9606    0.1745
Pt    0.7178    0.8412    0.2154
Pt    0.5080    0.9183    0.1750
Pt    0.6357    0.9235    0.1350
Pt    0.5062    0.9607    0.2172
Pt    0.5058    0.0053    0.1751
Pt    0.7184    0.8394    0.1317
Pt    0.7541    0.7972    0.2167
Pt    0.5063    0.0037    0.2549
Pt    0.5507    0.9189    0.1320
Pt    0.7162    0.7590    0.2997
Pt    0.6361    0.9596    0.3349
Pt    0.5489    0.9620    0.3364
Pt    0.5940    0.0050    0.3367
Pt    0.5917    0.9197    0.3381
Pt    0.6726    0.0043    0.3349
Pt    0.5962    0.9622    0.2952
Pt    0.5490    0.8773    0.3390
Pt    0.5892    0.8781    0.3793
Pt    0.7135    0.7992    0.2577
Pt    0.6737    0.7582    0.2568
Pt    0.5509    0.9176    0.2977
Pt    0.5493    0.0050    0.2991
Pt    0.6384    0.0003    0.2930
Pt    0.6310    0.0037    0.3781
Pt    0.5473    0.9199    0.3775
Pt    0.5484    0.8336    0.3789
Pt    0.6318    0.9227    0.3801
Pt    0.5068    0.9609    0.2963
Pt    0.7153    0.0022    0.3763
Pt    0.5907    0.9630    0.3783
Pt    0.5503    0.9629    0.2559
Pt    0.5909    0.9164    0.2601
Pt    0.5075    0.8405    0.3385
Pt    0.7547    0.7571    0.3411
Pt    0.5058    0.9608    0.3781
Pt    0.6705    0.9655    0.3805
Pt    0.7168    0.9645    0.4177
Pt    0.6304    0.9631    0.4218
Pt    0.6312    0.8778    0.4208
Pt    0.5448    0.7571    0.4631
Pt    0.5907    0.8383    0.4210
Pt    0.5891    0.9197    0.4188
Pt    0.6746    0.9205    0.4192
Pt    0.5465    0.9611    0.4191
Pt    0.5451    0.8797    0.4221
Pt    0.5484    0.7955    0.4202
Pt    0.5915    0.7954    0.4633
Pt    0.5873    0.8805    0.4643
Pt    0.5905    0.9622    0.4650
Pt    0.6732    0.8774    0.4634
Pt    0.6747    0.9597    0.4602
Pt    0.5070    0.0044    0.4226
Pt    0.5509    0.8380    0.4639
Pt    0.5476    0.9239    0.4673
Pt    0.6331    0.8354    0.4616
Pt    0.6309    0.9204    0.4601
Pt    0.7160    0.9138    0.4618
Pt    0.7531    0.9214    0.4181
Pt    0.6344    0.7934    0.5034
Pt    0.6727    0.0056    0.4213
Pt    0.5065    0.9219    0.4209
Pt    0.5913    0.7577    0.4215
Pt    0.6729    0.0054    0.5024
Pt    0.7525    0.9638    0.4646
Pt    0.5475    0.8802    0.5053
Pt    0.5891    0.0045    0.4206
Pt    0.6742    0.8352    0.5038
Pt    0.6321    0.8798    0.5052
Pt    0.5506    0.7972    0.5045
Pt    0.6743    0.9226    0.5051
Pt    0.7157    0.9624    0.5053
Pt    0.7157    0.9617    0.5917
Pt    0.5086    0.8340    0.5944
Pt    0.5460    0.9650    0.5082
Pt    0.6307    0.9630    0.5893
Pt    0.6324    0.9622    0.5057
Pt    0.6334    0.8772    0.5889
Pt    0.7546    0.9200    0.5923
Pt    0.5547    0.7977    0.5928
Pt    0.6739    0.9666    0.5498
Pt    0.5952    0.8355    0.5934
Pt    0.5968    0.7583    0.5911
Pt    0.5904    0.9207    0.5915
Pt    0.7161    0.8770    0.5060
Pt    0.6734    0.8786    0.5450
Pt    0.6758    0.9184    0.5885
Pt    0.7148    0.9203    0.5470
Pt    0.6311    0.9208    0.5491
Pt    0.5471    0.9622    0.5889
Pt    0.6337    0.8376    0.5461
Pt    0.5495    0.8762    0.5917
Pt    0.5481    0.9215    0.5493
Pt    0.5941    0.7968    0.5463
Pt    0.5894    0.8761    0.5502
Pt    0.5493    0.8356    0.5502
Pt    0.5932    0.9623    0.5483
Pt    0.5078    0.7569    0.5072
Pt    0.6739    0.0042    0.5929
Pt    0.7540    0.0050    0.5924
Pt    0.7532    0.9610    0.5475
Pt    0.5489    0.0046    0.5500
Pt    0.5075    0.9184    0.5898
Pt    0.5088    0.7953    0.5538
Pt    0.5918    0.0053    0.5908
Pt    0.5882    0.9224    0.5076
Pt    0.5930    0.8382    0.5063
Pt    0.5068    0.8372    0.5060
Pt    0.6320    0.9633    0.6763
Pt    0.5491    0.9640    0.6734
Pt    0.5932    0.9194    0.6733
Pt    0.5537    0.8769    0.6762
Pt    0.5921    0.8774    0.6318
Pt    0.5907    0.9602    0.7181
Pt    0.5473    0.9206    0.7156
Pt    0.7116    0.7588    0.7116
Pt    0.6306    0.0045    0.7140
Pt    0.5873    0.9182    0.7553
Pt    0.5901    0.9637    0.6324
Pt    0.6325    0.0042    0.6334
Pt    0.5506    0.9194    0.6333
Pt    0.6718    0.7611    0.7528
Pt    0.5487    0.8354    0.6357
Pt    0.5070    0.7940    0.6346
Pt    0.6748    0.9595    0.6352
Pt    0.7111    0.8038    0.7485
Pt    0.7141    0.9994    0.6356
Pt    0.5067    0.8802    0.7140
Pt    0.5458    0.0028    0.6309
Pt    0.7557    0.7948    0.7141
Pt    0.7541    0.8409    0.7537
Pt    0.5089    0.8790    0.6323
Pt    0.5499    0.0054    0.7161
Pt    0.6330    0.9207    0.6317
Pt    0.7107    0.8797    0.8341
Pt    0.7195    0.8005    0.8361
Pt    0.5872    0.8346    0.8353
Pt    0.7142    0.8411    0.7944
Pt    0.5886    0.9192    0.8343
Pt    0.5909    0.0048    0.8336
Pt    0.6739    0.8369    0.8365
Pt    0.6734    0.9231    0.8341
Pt    0.5894    0.7936    0.8788
Pt    0.6322    0.9649    0.8333
Pt    0.6326    0.8801    0.8377
Pt    0.7139    0.7575    0.7928
Pt    0.5891    0.8761    0.7944
Pt    0.6315    0.7941    0.8396
Pt    0.5907    0.9644    0.7933
Pt    0.6746    0.9655    0.8725
Pt    0.6731    0.7976    0.7953
Pt    0.5480    0.8760    0.8348
Pt    0.6694    0.8790    0.7930
Pt    0.6304    0.0043    0.8782
Pt    0.6750    0.7936    0.8762
Pt    0.5890    0.9652    0.8749
Pt    0.5457    0.9166    0.7947
Pt    0.5062    0.9193    0.8347
Pt    0.6304    0.8402    0.7978
Pt    0.5476    0.9629    0.8369
Pt    0.6292    0.9201    0.7955
Pt    0.5440    0.9614    0.7585
Pt    0.5446    0.8358    0.8757
Pt    0.7146    0.8370    0.8774
Pt    0.7142    0.9200    0.8786
Pt    0.5888    0.8773    0.8762
Pt    0.6316    0.9215    0.8783
Pt    0.6317    0.8368    0.8772
Pt    0.5446    0.9231    0.8776
Pt    0.5482    0.0057    0.8773
Pt    0.7140    0.9602    0.9164
Pt    0.7143    0.8758    0.9186
Pt    0.6294    0.9639    0.9197
Pt    0.6730    0.8783    0.8807
Pt    0.5923    0.8368    0.9182
Pt    0.5903    0.9229    0.9187
Pt    0.6744    0.8322    0.9185
Pt    0.6735    0.9205    0.9170
Pt    0.6321    0.8780    0.9199
Pt    0.6327    0.7930    0.9164
Pt    0.5471    0.9644    0.9184
Pt    0.5904    0.7953    0.9599
Pt    0.5902    0.8789    0.9629
Pt    0.5882    0.9626    0.9661
Pt    0.6752    0.8778    0.9623
Pt    0.6745    0.9597    0.9586
Pt    0.5071    0.8731    0.9607
Pt    0.5502    0.8377    0.9595
Pt    0.5484    0.9224    0.9645
Pt    0.6353    0.8321    0.9608
Pt    0.6334    0.9209    0.9636
Pt    0.7165    0.9186    0.9636
Pt    0.5484    0.7963    0.9212
Pt    0.5484    0.8802    0.9180
Pt    0.6727    0.0031    0.9203
Pt    0.5062    0.9646    0.9618
Pt    0.6307    0.0035    0.9643
Pt    0.5923    0.8377    0.0046
Pt    0.5499    0.7925    0.0025
Pt    0.5063    0.9215    0.9231
Pt    0.7133    0.0057    0.9616
Pt    0.7117    0.9609    0.0021
Pt    0.7533    0.9206    0.9204
Pt    0.5489    0.8781    0.0039
Pt    0.5070    0.0058    0.0048
Pt    0.5088    0.8372    0.0054
Pt    0.7945    0.0066    0.0486
Pt    0.9604    0.2147    0.0893
Pt    0.9628    0.0919    0.0474
Pt    0.9621    0.1338    0.0938
Pt    0.7561    0.0896    0.0904
Pt    0.8763    0.0070    0.0483
Pt    0.9635    0.0495    0.0918
Pt    0.8368    0.0944    0.0896
Pt    0.8753    0.1397    0.0932
Pt    0.8756    0.1759    0.0460
Pt    0.8792    0.0495    0.0912
Pt    0.7966    0.0504    0.0905
Pt    0.9181    0.0945    0.0918
Pt    0.9607    0.1741    0.0479
Pt    0.9155    0.1778    0.0901
Pt    0.8785    0.0915    0.0458
Pt    0.8357    0.0493    0.0472
Pt    0.8390    0.1350    0.0469
Pt    0.9205    0.0488    0.0500
Pt    0.9183    0.1328    0.0461
Pt    0.9176    0.2172    0.0479
Pt    0.7560    0.0510    0.0466
Pt    0.7967    0.0933    0.0488
Pt    0.0039    0.2168    0.0479
Pt    0.9169    0.0087    0.0901
Pt    0.0032    0.0058    0.0930
Pt    0.0049    0.0471    0.0476
Pt    0.0033    0.1315    0.0493
Pt    0.9610    0.0063    0.0492
Pt    0.7959    0.1362    0.0067
Pt    0.9644    0.1317    0.0066
Pt    0.7962    0.0502    0.0071
Pt    0.0050    0.1746    0.0921
Pt    0.7564    0.0067    0.0963
Pt    0.9209    0.2550    0.0909
Pt    0.9197    0.0072    0.0089
Pt    0.9614    0.0098    0.1303
Pt    0.9591    0.2160    0.0069
Pt    0.7575    0.2111    0.2152
Pt    0.9139    0.0069    0.1762
Pt    0.9167    0.0925    0.1752
Pt    0.8388    0.0081    0.1769
Pt    0.0050    0.1757    0.1741
Pt    0.8756    0.0500    0.1734
Pt    0.9164    0.0526    0.2166
Pt    0.9610    0.0923    0.1367
Pt    0.9604    0.1351    0.1745
Pt    0.9617    0.0954    0.2160
Pt    0.0038    0.0090    0.1731
Pt    0.0046    0.1333    0.1341
Pt    0.9611    0.0504    0.1743
Pt    0.9594    0.1769    0.1344
Pt    0.9191    0.1350    0.1339
Pt    0.8749    0.0091    0.2191
Pt    0.9585    0.0088    0.2148
Pt    0.0003    0.2170    0.1321
Pt    0.8360    0.0490    0.1323
Pt    0.8742    0.0950    0.1340
Pt    0.8778    0.0076    0.1323
Pt    0.9216    0.0490    0.1350
Pt    0.0029    0.0523    0.2150
Pt    0.7965    0.2540    0.2157
Pt    0.0037    0.0058    0.2530
Pt    0.0035    0.0536    0.1345
Pt    0.9635    0.1282    0.3413
Pt    0.8350    0.0878    0.3375
Pt    0.8387    0.1751    0.3385
Pt    0.8796    0.1335    0.3393
Pt    0.8776    0.0495    0.3369
Pt    0.9616    0.0509    0.2571
Pt    0.9212    0.0895    0.3382
Pt    0.9227    0.1755    0.3386
Pt    0.9610    0.0448    0.3381
Pt    0.7568    0.1734    0.2611
Pt    0.8392    0.1320    0.2969
Pt    0.9618    0.0914    0.2995
Pt    0.8382    0.2157    0.2975
Pt    0.9170    0.0077    0.2569
Pt    0.9176    0.0475    0.2955
Pt    0.9203    0.0924    0.2565
Pt    0.9225    0.1333    0.2979
Pt    0.7993    0.1315    0.3371
Pt    0.8338    0.0490    0.3787
Pt    0.8755    0.0083    0.3795
Pt    0.7974    0.1745    0.3005
Pt    0.7985    0.2187    0.3390
Pt    0.8831    0.2155    0.3405
Pt    0.8798    0.0932    0.2973
Pt    0.0010    0.0928    0.2584
Pt    0.8791    0.1716    0.2979
Pt    0.7994    0.1751    0.3786
Pt    0.7932    0.0915    0.3782
Pt    0.0033    0.0474    0.2988
Pt    0.8384    0.1313    0.3789
Pt    0.8790    0.0904    0.3790
Pt    0.7982    0.2127    0.2584
Pt    0.8800    0.1732    0.3803
Pt    0.8763    0.0063    0.4628
Pt    0.7932    0.0061    0.4640
Pt    0.9238    0.2142    0.3832
Pt    0.8387    0.0920    0.4237
Pt    0.8383    0.1716    0.4213
Pt    0.9611    0.0439    0.4267
Pt    0.9196    0.0871    0.4233
Pt    0.9191    0.1722    0.4265
Pt    0.9643    0.2173    0.4234
Pt    0.8323    0.0476    0.4632
Pt    0.8326    0.1306    0.4645
Pt    0.9187    0.0471    0.4683
Pt    0.9202    0.1331    0.4669
Pt    0.9191    0.2177    0.4664
Pt    0.8802    0.2154    0.4213
Pt    0.7923    0.0918    0.4650
Pt    0.9231    0.2550    0.4211
Pt    0.8772    0.0919    0.4666
Pt    0.8757    0.1746    0.4659
Pt    0.9628    0.1290    0.4243
Pt    0.9621    0.0863    0.4678
Pt    0.9629    0.1723    0.4648
Pt    0.7911    0.0495    0.4212
Pt    0.7959    0.1314    0.4185
Pt    0.8761    0.0481    0.4243
Pt    0.8792    0.1305    0.4262
Pt    0.9630    0.1298    0.5045
Pt    0.0052    0.2550    0.4209
Pt    0.8385    0.2167    0.3823
Pt    0.9191    0.0465    0.3829
Pt    0.9201    0.1318    0.3849
Pt    0.0033    0.1707    0.4218
Pt    0.9620    0.1701    0.3817
Pt    0.8356    0.0886    0.5047
Pt    0.9623    0.0866    0.3818
Pt    0.0048    0.1755    0.5054
Pt    0.9636    0.2145    0.5899
Pt    0.7949    0.0904    0.5461
Pt    0.8785    0.0893    0.5503
Pt    0.8758    0.0477    0.5065
Pt    0.0034    0.1743    0.5934
Pt    0.9192    0.2182    0.5506
Pt    0.9624    0.0465    0.5904
Pt    0.8335    0.0918    0.5910
Pt    0.8346    0.1709    0.5907
Pt    0.8800    0.2146    0.5916
Pt    0.8771    0.1751    0.5492
Pt    0.8747    0.1324    0.5911
Pt    0.9226    0.0882    0.5930
Pt    0.8798    0.0484    0.5919
Pt    0.9207    0.1727    0.5903
Pt    0.7911    0.1325    0.5918
Pt    0.8347    0.0492    0.5483
Pt    0.7983    0.0470    0.5914
Pt    0.8332    0.1327    0.5483
Pt    0.9583    0.1754    0.5479
Pt    0.9639    0.0906    0.5499
Pt    0.9230    0.0488    0.5503
Pt    0.9614    0.1320    0.5938
Pt    0.9192    0.1305    0.5512
Pt    0.8750    0.0061    0.5487
Pt    0.0045    0.0897    0.5085
Pt    0.9186    0.0900    0.5073
Pt    0.9603    0.2149    0.5077
Pt    0.7916    0.0482    0.5064
Pt    0.0054    0.2526    0.5977
Pt    0.9197    0.1752    0.5066
Pt    0.9164    0.0060    0.5109
Pt    0.9640    0.0460    0.5096
Pt    0.0050    0.2165    0.5496
Pt    0.8328    0.2149    0.6286
Pt    0.8764    0.1322    0.5098
Pt    0.8375    0.0062    0.5901
Pt    0.8345    0.0067    0.5066
Pt    0.8336    0.0860    0.6765
Pt    0.8391    0.1761    0.6733
Pt    0.8745    0.0909    0.6342
Pt    0.9177    0.0894    0.6714
Pt    0.9199    0.1776    0.6762
Pt    0.9626    0.1319    0.6759
Pt    0.8348    0.1290    0.7142
Pt    0.8364    0.2139    0.7197
Pt    0.9185    0.0462    0.7128
Pt    0.9179    0.1311    0.7124
Pt    0.7977    0.1729    0.7187
Pt    0.8779    0.0894    0.7145
Pt    0.8781    0.1721    0.7179
Pt    0.9630    0.0901    0.6320
Pt    0.9597    0.0891    0.7140
Pt    0.7961    0.1330    0.6706
Pt    0.7928    0.2103    0.6755
Pt    0.8709    0.0441    0.6804
Pt    0.8759    0.1323    0.6748
Pt    0.8735    0.2192    0.6723
Pt    0.9643    0.0471    0.6745
Pt    0.0050    0.1339    0.6339
Pt    0.8372    0.0473    0.6325
Pt    0.9169    0.0457    0.6350
Pt    0.8783    0.1731    0.6350
Pt    0.0042    0.0437    0.7176
Pt    0.9605    0.1751    0.6357
Pt    0.7931    0.0882    0.6315
Pt    0.9197    0.2128    0.6332
Pt    0.8329    0.1313    0.6336
Pt    0.9189    0.0920    0.7540
Pt    0.7935    0.1733    0.6309
Pt    0.9195    0.1319    0.6342
Pt    0.0036    0.0928    0.7553
Pt    0.9594    0.1323    0.8356
Pt    0.9602    0.0451    0.7563
Pt    0.9604    0.0479    0.8378
Pt    0.0038    0.1306    0.8738
Pt    0.0010    0.0477    0.7971
Pt    0.9175    0.0886    0.8373
Pt    0.8372    0.0466    0.8784
Pt    0.9181    0.0474    0.8797
Pt    0.9161    0.0504    0.7948
Pt    0.9581    0.1730    0.8788
Pt    0.8755    0.0487    0.8330
Pt    0.9590    0.0894    0.7947
Pt    0.7967    0.2549    0.7989
Pt    0.9165    0.1318    0.8758
Pt    0.8750    0.0879    0.8766
Pt    0.9617    0.0878    0.8770
Pt    0.0005    0.1350    0.7933
Pt    0.0022    0.2144    0.8764
Pt    0.7950    0.2133    0.7593
Pt    0.9996    0.1711    0.8386
Pt    0.0047    0.0907    0.8321
Pt    0.9574    0.2133    0.9175
Pt    0.9618    0.1291    0.9165
Pt    0.8769    0.1345    0.0035
Pt    0.8342    0.0871    0.9193
Pt    0.0031    0.1317    0.9619
Pt    0.9209    0.0876    0.9197
Pt    0.9156    0.1726    0.9210
Pt    0.8782    0.0508    0.0045
Pt    0.8367    0.0509    0.9615
Pt    0.8356    0.1314    0.9628
Pt    0.9237    0.0462    0.9644
Pt    0.9188    0.1324    0.9586
Pt    0.9179    0.2177    0.9596
Pt    0.9632    0.0476    0.9195
Pt    0.7949    0.0918    0.9656
Pt    0.0046    0.2551    0.0047
Pt    0.8795    0.0888    0.9642
Pt    0.8754    0.1737    0.9605
Pt    0.8754    0.1286    0.9184
Pt    0.9628    0.0902    0.9632
Pt    0.9623    0.1715    0.9619
Pt    0.7952    0.0444    0.9167
Pt    0.8779    0.0470    0.9201
Pt    0.8370    0.0912    0.0056
Pt    0.0045    0.0083    0.9206
Pt    0.0003    0.1761    0.0034
Pt    0.0028    0.2154    0.9606
Pt    0.0042    0.1720    0.9172
Pt    0.0043    0.0884    0.9222
Pt    0.8379    0.0070    0.0053
Pt    0.9179    0.1737    0.0032
Pt    0.9202    0.0896    0.0047
Pt    0.9611    0.2547    0.9623
Pt    0.9169    0.2548    0.9168
Pt    0.7621    0.0904    0.9175
Pt    0.7967    0.0064    0.9624
Pt    0.9627    0.0470    0.0053
Pt    0.8366    0.1745    0.0036
Pt    0.8771    0.2161    0.0013
Pt    0.0028    0.0475    0.9638
Pt    0.7567    0.0485    0.9611
Pt    0.9631    0.3760    0.0901
Pt    0.8806    0.4649    0.0090
Pt    0.8359    0.3373    0.0942
Pt    0.0026    0.2576    0.0929
Pt    0.8375    0.4223    0.0927
Pt    0.0041    0.4610    0.0470
Pt    0.8812    0.3796    0.0093
Pt    0.8825    0.2975    0.0970
Pt    0.9199    0.3389    0.0968
Pt    0.8750    0.3794    0.0915
Pt    0.9205    0.4205    0.0909
Pt    0.9635    0.4612    0.0896
Pt    0.8353    0.3764    0.0470
Pt    0.8384    0.4646    0.0481
Pt    0.9193    0.2993    0.0493
Pt    0.9202    0.3755    0.0510
Pt    0.9248    0.4666    0.0487
Pt    0.7939    0.4203    0.0505
Pt    0.8773    0.3357    0.0488
Pt    0.8780    0.4204    0.0488
Pt    0.9622    0.2990    0.0911
Pt    0.9654    0.3378    0.0475
Pt    0.9650    0.4176    0.0495
Pt    0.7961    0.3819    0.0891
Pt    0.8787    0.4636    0.0897
Pt    0.7971    0.4618    0.0902
Pt    0.7569    0.4160    0.0057
Pt    0.0050    0.2972    0.0493
Pt    0.9214    0.4224    0.0088
Pt    0.9651    0.4601    0.0058
Pt    0.7923    0.4619    0.0069
Pt    0.8376    0.4206    0.0095
Pt    0.9605    0.2594    0.0486
Pt    0.9195    0.2586    0.0064
Pt    0.7592    0.5025    0.0944
Pt    0.8386    0.5057    0.0059
Pt    0.8360    0.5038    0.0957
Pt    0.7971    0.5042    0.0459
Pt    0.9220    0.4627    0.1290
Pt    0.9639    0.4607    0.1770
Pt    0.8346    0.3396    0.1744
Pt    0.8363    0.4273    0.1795
Pt    0.9168    0.3400    0.1755
Pt    0.9217    0.4220    0.1749
Pt    0.9617    0.3766    0.1767
Pt    0.0031    0.3736    0.1353
Pt    0.8358    0.2978    0.2137
Pt    0.8781    0.4239    0.1341
Pt    0.8347    0.3831    0.2191
Pt    0.7945    0.3439    0.1361
Pt    0.8394    0.4670    0.1368
Pt    0.8359    0.3829    0.1359
Pt    0.9175    0.3791    0.2164
Pt    0.9242    0.3811    0.1336
Pt    0.9220    0.4606    0.2159
Pt    0.7920    0.3001    0.1718
Pt    0.8374    0.2967    0.1374
Pt    0.7952    0.3413    0.2156
Pt    0.8774    0.2973    0.1751
Pt    0.7969    0.3865    0.1778
Pt    0.8731    0.3401    0.2190
Pt    0.8819    0.4683    0.1774
Pt    0.8799    0.4210    0.2172
Pt    0.7977    0.4264    0.1366
Pt    0.8778    0.3823    0.1753
Pt    0.9649    0.4180    0.2147
Pt    0.9651    0.3340    0.1387
Pt    0.9637    0.4217    0.1329
Pt    0.9211    0.2979    0.1358
Pt    0.8764    0.3395    0.1344
Pt    0.9171    0.5052    0.2518
Pt    0.7954    0.2963    0.2547
Pt    0.9631    0.4643    0.2546
Pt    0.8356    0.2561    0.2546
Pt    0.9619    0.4620    0.3353
Pt    0.9220    0.4630    0.3767
Pt    0.9629    0.3729    0.3331
Pt    0.9625    0.4193    0.2956
Pt    0.8792    0.4669    0.3348
Pt    0.9161    0.4197    0.3375
Pt    0.9628    0.3375    0.3795
Pt    0.8372    0.4657    0.3776
Pt    0.8779    0.4210    0.3789
Pt    0.9197    0.4627    0.2956
Pt    0.9627    0.4174    0.3768
Pt    0.9216    0.3790    0.3767
Pt    0.7955    0.2576    0.2972
Pt    0.9205    0.4226    0.2574
Pt    0.0044    0.4208    0.3352
Pt    0.0020    0.2940    0.3785
Pt    0.0042    0.3326    0.3387
Pt    0.9644    0.5044    0.3797
Pt    0.9657    0.4623    0.4161
Pt    0.8389    0.4222    0.4195
Pt    0.9234    0.5053    0.4221
Pt    0.9169    0.3364    0.4161
Pt    0.9217    0.4224    0.4205
Pt    0.7561    0.4207    0.4166
Pt    0.8352    0.3797    0.4625
Pt    0.8372    0.4642    0.4599
Pt    0.9185    0.2965    0.4618
Pt    0.9216    0.3790    0.4600
Pt    0.9225    0.4649    0.4622
Pt    0.7944    0.4198    0.4566
Pt    0.8779    0.3374    0.4595
Pt    0.8777    0.4211    0.4625
Pt    0.8390    0.4230    0.5037
Pt    0.9631    0.3375    0.4631
Pt    0.9639    0.4228    0.4604
Pt    0.7936    0.4641    0.4179
Pt    0.8801    0.3816    0.4181
Pt    0.8824    0.4631    0.4186
Pt    0.9609    0.2962    0.4217
Pt    0.9628    0.3776    0.4217
Pt    0.8823    0.2999    0.5054
Pt    0.8781    0.3822    0.5041
Pt    0.7954    0.3807    0.5041
Pt    0.9629    0.2567    0.4646
Pt    0.7570    0.4616    0.4622
Pt    0.8384    0.5056    0.4176
Pt    0.8346    0.3401    0.5029
Pt    0.9204    0.3435    0.5055
Pt    0.7575    0.5058    0.5031
Pt    0.9202    0.4207    0.5034
Pt    0.7982    0.4607    0.5038
Pt    0.0042    0.3366    0.4186
Pt    0.8778    0.4664    0.5032
Pt    0.0056    0.4217    0.4208
Pt    0.9655    0.5038    0.4645
Pt    0.0054    0.3831    0.4653
Pt    0.9641    0.4619    0.5884
Pt    0.8751    0.4608    0.5898
Pt    0.0055    0.3396    0.5066
Pt    0.9615    0.2987    0.5929
Pt    0.8333    0.4184    0.5920
Pt    0.0035    0.4211    0.5907
Pt    0.9200    0.2569    0.5951
Pt    0.7931    0.4609    0.5901
Pt    0.9184    0.3390    0.5900
Pt    0.9640    0.3819    0.5074
Pt    0.9205    0.4230    0.5928
Pt    0.9591    0.2986    0.5082
Pt    0.8311    0.3779    0.5480
Pt    0.8350    0.4598    0.5493
Pt    0.9599    0.3788    0.5958
Pt    0.9187    0.2975    0.5522
Pt    0.9207    0.3807    0.5485
Pt    0.9641    0.4198    0.5474
Pt    0.9194    0.4638    0.5468
Pt    0.8758    0.3796    0.5890
Pt    0.7905    0.4166    0.5501
Pt    0.8747    0.3388    0.5476
Pt    0.8777    0.4199    0.5473
Pt    0.9611    0.3396    0.5482
Pt    0.0031    0.3394    0.5908
Pt    0.7590    0.4171    0.5951
Pt    0.0036    0.2948    0.5526
Pt    0.7961    0.5034    0.5471
Pt    0.7568    0.4627    0.5467
Pt    0.9205    0.4996    0.5900
Pt    0.9611    0.2582    0.5488
Pt    0.9638    0.4624    0.5083
Pt    0.0053    0.2566    0.5062
Pt    0.7957    0.5048    0.6303
Pt    0.9188    0.2571    0.5064
Pt    0.9587    0.4635    0.6761
Pt    0.9177    0.4209    0.6787
Pt    0.9164    0.3793    0.6325
Pt    0.9188    0.4656    0.7202
Pt    0.8755    0.4214    0.6352
Pt    0.9622    0.4168    0.7182
Pt    0.8778    0.4630    0.6767
Pt    0.9572    0.3772    0.6748
Pt    0.7584    0.3000    0.7151
Pt    0.8365    0.2606    0.7555
Pt    0.9620    0.5035    0.6328
Pt    0.0021    0.4605    0.6349
Pt    0.9161    0.4620    0.6342
Pt    0.9605    0.3367    0.6345
Pt    0.9209    0.4176    0.7552
Pt    0.7976    0.2560    0.7162
Pt    0.8341    0.4619    0.6347
Pt    0.0019    0.3386    0.6737
Pt    0.0047    0.4191    0.6783
Pt    0.0052    0.2976    0.6339
Pt    0.9596    0.4206    0.6366
Pt    0.0035    0.3802    0.6345
Pt    0.0014    0.3747    0.7166
Pt    0.0023    0.4628    0.7158
Pt    0.0039    0.5051    0.6728
Pt    0.9643    0.4621    0.8376
Pt    0.0048    0.5040    0.8378
Pt    0.9624    0.3796    0.8376
Pt    0.9616    0.4651    0.7579
Pt    0.8376    0.3406    0.8397
Pt    0.8366    0.4227    0.8376
Pt    0.9191    0.3390    0.8376
Pt    0.7579    0.2565    0.8418
Pt    0.9242    0.4215    0.8393
Pt    0.8773    0.4687    0.8363
Pt    0.8333    0.3013    0.7984
Pt    0.9174    0.2968    0.8782
Pt    0.8355    0.3814    0.7967
Pt    0.7928    0.2998    0.8391
Pt    0.8793    0.2968    0.8381
Pt    0.7948    0.3829    0.8423
Pt    0.9232    0.3753    0.7954
Pt    0.8792    0.4233    0.8803
Pt    0.9224    0.4616    0.7970
Pt    0.9639    0.4168    0.7941
Pt    0.0048    0.4604    0.8797
Pt    0.7950    0.3418    0.7984
Pt    0.8386    0.4650    0.8774
Pt    0.8783    0.3810    0.8376
Pt    0.8768    0.3397    0.7973
Pt    0.9656    0.3352    0.8761
Pt    0.8824    0.4183    0.7960
Pt    0.9207    0.4669    0.8763
Pt    0.8372    0.2957    0.8795
Pt    0.9638    0.5047    0.8780
Pt    0.9240    0.3789    0.8806
Pt    0.7958    0.2996    0.7581
Pt    0.8353    0.3826    0.8820
Pt    0.8333    0.3369    0.9244
Pt    0.8351    0.4239    0.9215
Pt    0.8772    0.3392    0.8810
Pt    0.9205    0.3376    0.9215
Pt    0.9223    0.4230    0.9224
Pt    0.9617    0.4647    0.9234
Pt    0.8341    0.3803    0.9638
Pt    0.8387    0.4643    0.9637
Pt    0.9169    0.2957    0.9625
Pt    0.9205    0.3784    0.9651
Pt    0.9197    0.4636    0.9657
Pt    0.7967    0.4244    0.9644
Pt    0.8771    0.3419    0.9642
Pt    0.8784    0.4215    0.9677
Pt    0.9667    0.3770    0.9223
Pt    0.9623    0.3333    0.9627
Pt    0.9636    0.4186    0.9619
Pt    0.7948    0.3831    0.9225
Pt    0.7968    0.4657    0.9208
Pt    0.8775    0.2992    0.9247
Pt    0.8769    0.3802    0.9215
Pt    0.8786    0.4650    0.9224
Pt    0.9610    0.2938    0.9180
Pt    0.9629    0.4240    0.8824
Pt    0.9220    0.3343    0.0053
Pt    0.9648    0.3791    0.0045
Pt    0.7951    0.4240    0.8819
Pt    0.7951    0.3385    0.8831
Pt    0.9229    0.5056    0.9213
Pt    0.0046    0.2938    0.9626
Pt    0.0053    0.2568    0.9169
Pt    0.0049    0.3351    0.0021
Pt    0.9616    0.2963    0.0053
Pt    0.9674    0.7155    0.0946
Pt    0.7954    0.5476    0.0939
Pt    0.9227    0.6773    0.0063
Pt    0.9662    0.6762    0.0491
Pt    0.9207    0.5936    0.0091
Pt    0.9664    0.5927    0.0507
Pt    0.9646    0.7555    0.0533
Pt    0.8364    0.5923    0.0900
Pt    0.8415    0.6776    0.0912
Pt    0.9671    0.6350    0.0896
Pt    0.9646    0.5501    0.0909
Pt    0.8822    0.7157    0.0900
Pt    0.9232    0.5910    0.0899
Pt    0.8807    0.6361    0.0867
Pt    0.9240    0.6766    0.0915
Pt    0.8792    0.5483    0.0915
Pt    0.8350    0.5479    0.0504
Pt    0.8384    0.6376    0.0479
Pt    0.9229    0.5496    0.0490
Pt    0.9243    0.6369    0.0497
Pt    0.9198    0.7213    0.0495
Pt    0.8815    0.6788    0.0472
Pt    0.7937    0.5906    0.0514
Pt    0.7962    0.6276    0.0950
Pt    0.8801    0.5930    0.0517
Pt    0.9225    0.5063    0.0922
Pt    0.9631    0.6333    0.0058
Pt    0.7975    0.5496    0.0079
Pt    0.9628    0.7191    0.0069
Pt    0.9640    0.5079    0.0493
Pt    0.8373    0.5926    0.0095
Pt    0.7578    0.5955    0.0091
Pt    0.9249    0.5062    0.0071
Pt    0.8800    0.5067    0.0492
Pt    0.8801    0.5490    0.0110
Pt    0.9656    0.5488    0.0066
Pt    0.7563    0.5501    0.0510
Pt    0.9225    0.7546    0.0952
Pt    0.8800    0.6360    0.0065
Pt    0.8388    0.5931    0.1752
Pt    0.8395    0.6732    0.1736
Pt    0.9627    0.5488    0.1758
Pt    0.9241    0.5884    0.1713
Pt    0.9231    0.6746    0.1783
Pt    0.9641    0.6342    0.1804
Pt    0.7582    0.7169    0.2137
Pt    0.8806    0.5075    0.1317
Pt    0.8398    0.6335    0.2165
Pt    0.7950    0.7132    0.1738
Pt    0.8378    0.7168    0.2139
Pt    0.7965    0.6343    0.1765
Pt    0.9185    0.5500    0.2142
Pt    0.0043    0.5511    0.1327
Pt    0.9194    0.6352    0.2181
Pt    0.9629    0.5076    0.1344
Pt    0.8779    0.5891    0.1319
Pt    0.8819    0.6315    0.1733
Pt    0.7989    0.6754    0.2158
Pt    0.8776    0.5511    0.1742
Pt    0.8401    0.7161    0.1347
Pt    0.8786    0.5941    0.2160
Pt    0.8827    0.7162    0.1812
Pt    0.8785    0.6745    0.2206
Pt    0.9632    0.5080    0.2137
Pt    0.7976    0.6744    0.1331
Pt    0.9651    0.6729    0.1368
Pt    0.9638    0.5914    0.2193
Pt    0.9212    0.5060    0.1722
Pt    0.9643    0.5926    0.1322
Pt    0.8372    0.5466    0.1353
Pt    0.9252    0.7149    0.1365
Pt    0.8404    0.7556    0.2555
Pt    0.0054    0.5500    0.2154
Pt    0.8829    0.6736    0.1348
Pt    0.7948    0.5911    0.1381
Pt    0.8392    0.6347    0.1326
Pt    0.9241    0.5501    0.1306
Pt    0.9225    0.6332    0.1307
Pt    0.9652    0.6345    0.3389
Pt    0.9612    0.5064    0.2952
Pt    0.9613    0.5486    0.3342
Pt    0.8396    0.5499    0.3770
Pt    0.9628    0.5964    0.2950
Pt    0.9217    0.5926    0.3354
Pt    0.8350    0.5096    0.3369
Pt    0.9674    0.6750    0.3772
Pt    0.9198    0.5496    0.2945
Pt    0.9222    0.6326    0.3769
Pt    0.8800    0.5497    0.3353
Pt    0.8016    0.7115    0.2601
Pt    0.9195    0.5064    0.3373
Pt    0.8784    0.5930    0.3774
Pt    0.9642    0.5913    0.3773
Pt    0.0051    0.5476    0.3745
Pt    0.9220    0.5481    0.3805
Pt    0.7962    0.5080    0.3784
Pt    0.7589    0.7132    0.2988
Pt    0.8802    0.5091    0.3796
Pt    0.8811    0.5072    0.2938
Pt    0.0053    0.5925    0.2567
Pt    0.9197    0.5915    0.2557
Pt    0.9619    0.5489    0.2566
Pt    0.9629    0.7157    0.4172
Pt    0.9667    0.6332    0.4193
Pt    0.7574    0.5956    0.5010
Pt    0.8388    0.5901    0.4197
Pt    0.9662    0.7157    0.5048
Pt    0.9233    0.5929    0.4203
Pt    0.9212    0.6775    0.4191
Pt    0.8801    0.5071    0.4610
Pt    0.8382    0.5483    0.4603
Pt    0.8390    0.6309    0.4566
Pt    0.9220    0.5481    0.4635
Pt    0.9217    0.6360    0.4617
Pt    0.9227    0.7184    0.4611
Pt    0.8792    0.6354    0.4189
Pt    0.7955    0.5897    0.4568
Pt    0.9656    0.5473    0.4221
Pt    0.8809    0.5915    0.4614
Pt    0.8770    0.6768    0.4592
Pt    0.8400    0.6761    0.5021
Pt    0.9671    0.5919    0.4617
Pt    0.9632    0.6751    0.4628
Pt    0.7945    0.5492    0.4162
Pt    0.8787    0.5501    0.4195
Pt    0.7959    0.5075    0.4586
Pt    0.9226    0.6759    0.5052
Pt    0.9250    0.7544    0.4161
Pt    0.7570    0.5916    0.4183
Pt    0.7986    0.6316    0.4969
Pt    0.8793    0.6345    0.5020
Pt    0.8793    0.7152    0.5041
Pt    0.8400    0.5921    0.5038
Pt    0.7966    0.5503    0.5020
Pt    0.9229    0.5923    0.5045
Pt    0.8819    0.5515    0.5039
Pt    0.9650    0.6329    0.5035
Pt    0.8383    0.5068    0.5048
Pt    0.7960    0.5926    0.5427
Pt    0.9631    0.7145    0.5946
Pt    0.9613    0.5059    0.5479
Pt    0.9641    0.6301    0.5931
Pt    0.0039    0.6727    0.5920
Pt    0.9207    0.7168    0.5450
Pt    0.9612    0.5438    0.5903
Pt    0.8352    0.5938    0.5881
Pt    0.8815    0.6323    0.5864
Pt    0.8781    0.5903    0.5451
Pt    0.8766    0.5494    0.5901
Pt    0.7940    0.5469    0.5885
Pt    0.9200    0.5889    0.5879
Pt    0.9646    0.6757    0.5479
Pt    0.9247    0.6711    0.5892
Pt    0.8353    0.5059    0.5886
Pt    0.8335    0.5509    0.5486
Pt    0.9640    0.5906    0.5489
Pt    0.8347    0.6347    0.5440
Pt    0.9200    0.5475    0.5485
Pt    0.8815    0.6742    0.5465
Pt    0.9215    0.6326    0.5471
Pt    0.9226    0.5063    0.5071
Pt    0.7566    0.5498    0.5433
Pt    0.8358    0.5472    0.6305
Pt    0.0054    0.5060    0.5906
Pt    0.7583    0.5918    0.5857
Pt    0.9635    0.5472    0.5058
Pt    0.8752    0.5084    0.5493
Pt    0.7560    0.7162    0.7154
Pt    0.9615    0.5502    0.7531
Pt    0.9203    0.5867    0.6753
Pt    0.8772    0.5062    0.7176
Pt    0.9168    0.5489    0.7142
Pt    0.9605    0.5065    0.7153
Pt    0.7600    0.7549    0.7536
Pt    0.9643    0.5931    0.7169
Pt    0.8740    0.5500    0.6752
Pt    0.9624    0.5474    0.6742
Pt    0.9603    0.6323    0.6742
Pt    0.7562    0.7544    0.6706
Pt    0.9618    0.5892    0.6312
Pt    0.9182    0.5475    0.6316
Pt    0.8766    0.5887    0.6342
Pt    0.8378    0.5065    0.6701
Pt    0.9178    0.6305    0.6337
Pt    0.0036    0.6360    0.7137
Pt    0.7999    0.7546    0.7119
Pt    0.7995    0.7097    0.7489
Pt    0.9196    0.5944    0.7539
Pt    0.8366    0.7547    0.7543
Pt    0.9608    0.6733    0.6352
Pt    0.0048    0.5484    0.7149
Pt    0.0057    0.7137    0.6365
Pt    0.0015    0.5470    0.6314
Pt    0.9184    0.5060    0.6731
Pt    0.8777    0.5086    0.6313
Pt    0.9645    0.6366    0.8318
Pt    0.8359    0.5914    0.8358
Pt    0.8337    0.6722    0.8402
Pt    0.8773    0.6319    0.8388
Pt    0.8773    0.5493    0.8348
Pt    0.9637    0.5086    0.7967
Pt    0.9221    0.5919    0.8370
Pt    0.9184    0.6759    0.8380
Pt    0.9635    0.5497    0.8371
Pt    0.0043    0.6360    0.8766
Pt    0.8345    0.6329    0.7979
Pt    0.8772    0.5096    0.8788
Pt    0.8365    0.7174    0.7969
Pt    0.9212    0.5072    0.8364
Pt    0.9220    0.5528    0.7944
Pt    0.9190    0.5493    0.8775
Pt    0.9173    0.6338    0.7968
Pt    0.9187    0.5072    0.7595
Pt    0.9624    0.5943    0.7955
Pt    0.8707    0.7169    0.8400
Pt    0.7963    0.6731    0.7957
Pt    0.0038    0.5512    0.7926
Pt    0.9186    0.7172    0.8759
Pt    0.8779    0.5920    0.7948
Pt    0.9208    0.6319    0.8766
Pt    0.8760    0.6751    0.7984
Pt    0.7928    0.6310    0.8391
Pt    0.7946    0.7124    0.8379
Pt    0.8761    0.6737    0.8776
Pt    0.0051    0.5910    0.8356
Pt    0.9640    0.5932    0.8783
Pt    0.8337    0.5501    0.8763
Pt    0.8325    0.7167    0.8798
Pt    0.8367    0.6307    0.8772
Pt    0.0052    0.5987    0.7575
Pt    0.9658    0.5065    0.9662
Pt    0.8766    0.5923    0.8816
Pt    0.8810    0.5069    0.9663
Pt    0.8357    0.5899    0.9258
Pt    0.8395    0.6748    0.9220
Pt    0.7558    0.5061    0.9160
Pt    0.9192    0.5929    0.9217
Pt    0.9190    0.6756    0.9239
Pt    0.9644    0.7133    0.9225
Pt    0.8411    0.5492    0.9659
Pt    0.8363    0.6359    0.9644
Pt    0.9236    0.5474    0.9641
Pt    0.9213    0.6346    0.9655
Pt    0.9199    0.7181    0.9625
Pt    0.9139    0.7529    0.0043
Pt    0.7942    0.5917    0.9643
Pt    0.9608    0.5529    0.9180
Pt    0.8795    0.5905    0.9667
Pt    0.8773    0.6753    0.9670
Pt    0.9627    0.6318    0.9244
Pt    0.9642    0.5910    0.9662
Pt    0.9632    0.6754    0.9651
Pt    0.7959    0.5501    0.9206
Pt    0.7938    0.6336    0.9208
Pt    0.8784    0.5500    0.9243
Pt    0.8776    0.6313    0.9206
Pt    0.8782    0.7189    0.9160
Pt    0.7975    0.5077    0.9646
Pt    0.7572    0.5496    0.9641
Pt    0.8383    0.5077    0.9208
Pt    0.0045    0.5919    0.9198
Pt    0.0047    0.5474    0.9612
Pt    0.9606    0.6711    0.8817
Pt    0.7953    0.6743    0.8832
Pt    0.7971    0.5928    0.8826
Pt    0.9627    0.9621    0.0929
Pt    0.7573    0.9230    0.0948
Pt    0.9610    0.7933    0.0086
Pt    0.7966    0.9630    0.0931
Pt    0.8350    0.9183    0.0891
Pt    0.9614    0.8800    0.0077
Pt    0.9598    0.8804    0.0894
Pt    0.8763    0.9625    0.0892
Pt    0.9176    0.8360    0.0894
Pt    0.9614    0.9214    0.0481
Pt    0.9175    0.9189    0.0894
Pt    0.8753    0.8767    0.0888
Pt    0.8337    0.8756    0.0471
Pt    0.8372    0.9602    0.0453
Pt    0.9166    0.7904    0.0476
Pt    0.9190    0.8749    0.0476
Pt    0.9193    0.9643    0.0502
Pt    0.7969    0.9204    0.0468
Pt    0.8755    0.8331    0.0483
Pt    0.8777    0.9197    0.0460
Pt    0.9625    0.7992    0.0912
Pt    0.9628    0.8369    0.0498
Pt    0.9626    0.9628    0.0087
Pt    0.8359    0.0050    0.0913
Pt    0.0042    0.9631    0.0478
Pt    0.9186    0.8338    0.0075
Pt    0.0048    0.8812    0.0479
Pt    0.0032    0.8397    0.0091
Pt    0.0046    0.9219    0.0936
Pt    0.0055    0.9208    0.0059
Pt    0.7966    0.9636    0.0062
Pt    0.8790    0.9639    0.0058
Pt    0.9614    0.9673    0.1728
Pt    0.9184    0.9229    0.1735
Pt    0.8358    0.9645    0.1347
Pt    0.0027    0.8014    0.1341
Pt    0.7975    0.7578    0.2130
Pt    0.8774    0.9623    0.1761
Pt    0.9225    0.9641    0.2147
Pt    0.9609    0.9175    0.2137
Pt    0.0035    0.9188    0.1730
Pt    0.9573    0.8750    0.1734
Pt    0.0030    0.8788    0.2138
Pt    0.7575    0.7571    0.1733
Pt    0.9589    0.9201    0.1329
Pt    0.8789    0.9206    0.1318
Pt    0.9614    0.8388    0.1308
Pt    0.9183    0.8762    0.1335
Pt    0.0032    0.9655    0.2130
Pt    0.0024    0.8386    0.1767
Pt    0.9244    0.9165    0.2536
Pt    0.8037    0.8018    0.2483
Pt    0.0024    0.8788    0.1320
Pt    0.0032    0.9628    0.1328
Pt    0.7945    0.0047    0.1357
Pt    0.0053    0.9215    0.2548
Pt    0.7605    0.7562    0.2552
Pt    0.9194    0.9650    0.1309
Pt    0.9625    0.9621    0.3377
Pt    0.8347    0.7971    0.3788
Pt    0.9621    0.8767    0.3370
Pt    0.9205    0.8791    0.3755
Pt    0.8377    0.8387    0.3390
Pt    0.8365    0.9217    0.3341
Pt    0.9201    0.8346    0.3353
Pt    0.8772    0.7961    0.3352
Pt    0.9210    0.9218    0.3374
Pt    0.8771    0.9618    0.3378
Pt    0.8407    0.7963    0.2953
Pt    0.7996    0.7559    0.2973
Pt    0.8364    0.8795    0.2933
Pt    0.7907    0.8763    0.3357
Pt    0.9631    0.8384    0.3798
Pt    0.7963    0.7965    0.3380
Pt    0.9214    0.8796    0.2953
Pt    0.8343    0.8801    0.3782
Pt    0.9205    0.9637    0.2967
Pt    0.7914    0.9168    0.3758
Pt    0.8785    0.8390    0.3796
Pt    0.8010    0.8360    0.2951
Pt    0.7927    0.8383    0.3786
Pt    0.9660    0.9184    0.3774
Pt    0.8770    0.8388    0.2947
Pt    0.8785    0.8799    0.3364
Pt    0.8813    0.9207    0.2960
Pt    0.9652    0.9209    0.2957
Pt    0.9237    0.7977    0.3754
Pt    0.8796    0.9202    0.3788
Pt    0.9186    0.0054    0.3379
Pt    0.0036    0.9634    0.2954
Pt    0.8346    0.9625    0.3781
Pt    0.9636    0.0057    0.2950
Pt    0.7581    0.7975    0.2967
Pt    0.9201    0.9627    0.3778
Pt    0.7582    0.8368    0.2559
Pt    0.9618    0.9630    0.2557
Pt    0.9216    0.7565    0.5039
Pt    0.8373    0.8345    0.4183
Pt    0.8344    0.9209    0.4196
Pt    0.9600    0.0015    0.4687
Pt    0.9220    0.8373    0.4205
Pt    0.9202    0.9205    0.4186
Pt    0.9644    0.9620    0.4251
Pt    0.8319    0.8780    0.4625
Pt    0.8347    0.9647    0.4620
Pt    0.9219    0.7949    0.4611
Pt    0.9234    0.8803    0.4637
Pt    0.9194    0.9616    0.4603
Pt    0.7933    0.9210    0.4612
Pt    0.8763    0.8343    0.4606
Pt    0.8750    0.9198    0.4637
Pt    0.9669    0.7570    0.4567
Pt    0.9663    0.8341    0.4622
Pt    0.9683    0.9205    0.4636
Pt    0.7926    0.8783    0.4207
Pt    0.7901    0.9640    0.4203
Pt    0.8803    0.7919    0.4183
Pt    0.8783    0.8768    0.4216
Pt    0.8751    0.9630    0.4175
Pt    0.9654    0.7980    0.4171
Pt    0.9633    0.8772    0.4210
Pt    0.9161    0.0044    0.4221
Pt    0.0052    0.0040    0.4231
Pt    0.8322    0.0052    0.4180
Pt    0.8766    0.8741    0.5049
Pt    0.9199    0.9230    0.5046
Pt    0.9183    0.8369    0.5042
Pt    0.9619    0.0052    0.3825
Pt    0.8764    0.9631    0.5054
Pt    0.7966    0.9610    0.5049
Pt    0.9628    0.8754    0.5030
Pt    0.8362    0.9213    0.5051
Pt    0.0053    0.9621    0.5490
Pt    0.0049    0.7574    0.5969
Pt    0.8340    0.8341    0.5885
Pt    0.0043    0.8778    0.5480
Pt    0.8364    0.9199    0.5911
Pt    0.9646    0.8773    0.5927
Pt    0.8766    0.9608    0.5915
Pt    0.9649    0.7972    0.5904
Pt    0.9182    0.8368    0.5880
Pt    0.8766    0.9197    0.5490
Pt    0.9226    0.9181    0.5921
Pt    0.9622    0.9590    0.5920
Pt    0.8754    0.8355    0.5482
Pt    0.8333    0.8797    0.5465
Pt    0.7960    0.9632    0.5944
Pt    0.8371    0.9613    0.5487
Pt    0.7910    0.8740    0.5877
Pt    0.9192    0.7951    0.5471
Pt    0.8758    0.7923    0.5868
Pt    0.9192    0.8765    0.5454
Pt    0.9634    0.8388    0.5497
Pt    0.9174    0.9622    0.5500
Pt    0.9602    0.9192    0.5472
Pt    0.8782    0.8766    0.5893
Pt    0.7949    0.9207    0.5498
Pt    0.9206    0.0029    0.5915
Pt    0.7580    0.9157    0.5069
Pt    0.9598    0.0029    0.5501
Pt    0.7943    0.0032    0.5507
Pt    0.9220    0.7558    0.5911
Pt    0.0054    0.0035    0.5912
Pt    0.9636    0.9608    0.5072
Pt    0.9231    0.7973    0.6281
Pt    0.9627    0.7564    0.5489
Pt    0.9641    0.7963    0.5060
Pt    0.0047    0.7571    0.5058
Pt    0.9617    0.9623    0.6763
Pt    0.8377    0.8378    0.6742
Pt    0.8368    0.9182    0.6774
Pt    0.9247    0.8356    0.6726
Pt    0.9221    0.9181    0.6780
Pt    0.9683    0.8758    0.6738
Pt    0.8384    0.7945    0.7149
Pt    0.8370    0.8736    0.7184
Pt    0.9210    0.8761    0.7169
Pt    0.9167    0.9595    0.7153
Pt    0.9614    0.0044    0.7148
Pt    0.7954    0.8367    0.7132
Pt    0.8810    0.8327    0.7154
Pt    0.8778    0.9164    0.7180
Pt    0.9642    0.9188    0.7156
Pt    0.7969    0.7942    0.6702
Pt    0.7950    0.8786    0.6765
Pt    0.8805    0.7947    0.6740
Pt    0.8797    0.8778    0.6760
Pt    0.8742    0.9599    0.6740
Pt    0.9709    0.8336    0.6360
Pt    0.9246    0.8771    0.6346
Pt    0.8343    0.9636    0.6331
Pt    0.7942    0.9175    0.6336
Pt    0.9177    0.0017    0.6749
Pt    0.0054    0.0051    0.6750
Pt    0.9208    0.9601    0.6341
Pt    0.8778    0.9177    0.6337
Pt    0.9647    0.9177    0.6348
Pt    0.8771    0.0037    0.6328
Pt    0.9162    0.0031    0.7528
Pt    0.8336    0.8787    0.6323
Pt    0.7957    0.8372    0.6331
Pt    0.8395    0.7918    0.6330
Pt    0.0055    0.9602    0.7172
Pt    0.9636    0.0037    0.6337
Pt    0.8002    0.8019    0.7554
Pt    0.8793    0.8361    0.6308
Pt    0.9607    0.9633    0.8390
Pt    0.7956    0.0055    0.8788
Pt    0.9634    0.8764    0.8378
Pt    0.9613    0.0053    0.8788
Pt    0.0034    0.9599    0.7973
Pt    0.9202    0.9196    0.8366
Pt    0.0035    0.8362    0.8386
Pt    0.9620    0.8380    0.8793
Pt    0.9626    0.9187    0.7962
Pt    0.9203    0.9598    0.7949
Pt    0.9196    0.0034    0.8369
Pt    0.8370    0.0038    0.8368
Pt    0.8799    0.9197    0.8774
Pt    0.8778    0.9617    0.8360
Pt    0.9196    0.9614    0.8792
Pt    0.8352    0.9624    0.8801
Pt    0.8798    0.0033    0.8768
Pt    0.7573    0.7564    0.8367
Pt    0.7978    0.7591    0.7972
Pt    0.8786    0.0049    0.7959
Pt    0.9194    0.9156    0.7599
Pt    0.0051    0.0027    0.7578
Pt    0.9605    0.0052    0.7955
Pt    0.9623    0.9620    0.7581
Pt    0.0011    0.8767    0.7958
Pt    0.9207    0.8780    0.8779
Pt    0.9620    0.9189    0.8786
Pt    0.7560    0.7988    0.7909
Pt    0.9636    0.9614    0.9206
Pt    0.8377    0.9171    0.9239
Pt    0.9627    0.0039    0.9656
Pt    0.9207    0.8360    0.9210
Pt    0.9197    0.9202    0.9213
Pt    0.8763    0.7949    0.0030
Pt    0.8360    0.8769    0.9622
Pt    0.8380    0.9623    0.9624
Pt    0.9194    0.7940    0.9653
Pt    0.9197    0.8787    0.9640
Pt    0.9206    0.9655    0.9631
Pt    0.7963    0.9224    0.9626
Pt    0.8804    0.8343    0.9603
Pt    0.8791    0.9210    0.9641
Pt    0.7557    0.9637    0.9636
Pt    0.9606    0.8365    0.9671
Pt    0.9622    0.9202    0.9641
Pt    0.7934    0.9639    0.9183
Pt    0.8795    0.8748    0.9198
Pt    0.8788    0.9623    0.9203
Pt    0.9610    0.7964    0.9236
Pt    0.9635    0.8767    0.9227
Pt    0.9628    0.7583    0.9667
Pt    0.0044    0.9636    0.8812
Pt    0.8390    0.0038    0.9215
Pt    0.9238    0.7563    0.9178
Pt    0.0049    0.7962    0.8817
Pt    0.0032    0.9594    0.9631
Pt    0.9232    0.0049    0.9245
Pt    0.8772    0.0049    0.9639
Pt    0.8770    0.8774    0.0041
Pt    0.8372    0.9193    0.0035
Pt    0.7936    0.8787    0.0019
Pt    0.9206    0.9232    0.0043
Pt    0.0046    0.7976    0.9691
Pt    0.0055    0.7565    0.9236
Pt    0.8342    0.8376    0.0048
Pt    0.7559    0.9204    0.0055
