# Supplementary material
Source: publisher figshare collection journal article supplement (https://rs.figshare.com/ndownloader/files/37464464)
Supplement: Supplementary file 2 [file 37464464 › Ordered_Nanoporous_Metals_SI/ONMs_Crystal_Structures/ONM_from_ST_CRI-ST3.cif]

data_block_1
#***********************************************************************************************
#
# On use of this cif file, please acknowledge citation to:
#
# Understanding the stability and structural properties of Ordered Nanoporous Metals towards their rational synthesis
# Jose M. Ortiz-Roldan, Salvador R. G. Balestra, Rocio Bueno-Perez, Sof�a Calero,
# Elena Garcia-Perez, C. Richard A. Catlow, A. Rabdel Ruiz-Salvador, Said Hamad
# Proc. R Soc. A 2022
#
# Contact emails: : said@upo.es, rruisal@upo.es, c.r.a.catlow@ucl.ac.uk
#
#***********************************************************************************************

_audit_creation_date         'Tue March 22 2022'
_audit_creation_method       'generated by GDIS v0.90'


_cell_length_a             39.0106
_cell_length_b             39.1003
_cell_length_c             39.1059
_cell_angle_alpha          90.00
_cell_angle_beta           90.00
_cell_angle_gamma          90.00


_symmetry_space_group_name_H-M   'P 1'
_symmetry_Int_Tables_number       1


loop_
_atom_site_label
_atom_site_fract_x
_atom_site_fract_y
_atom_site_fract_z
Pt    0.2271    0.9984    0.0454
Pt    0.0215    0.1592    0.0395
Pt    0.1388    0.1891    0.0394
Pt    0.0624    0.1795    0.0821
Pt    0.0929    0.2364    0.0472
Pt    0.1912    0.1417    0.0440
Pt    0.0810    0.1854    0.9984
Pt    0.2318    0.1342    0.9909
Pt    0.9917    0.1882    0.0922
Pt    0.1406    0.1385    0.0002
Pt    0.2376    0.0875    0.0358
Pt    0.1898    0.1894    0.9953
Pt    0.9966    0.2341    0.0451
Pt    0.1828    0.0872    0.9982
Pt    0.0388    0.2364    0.9911
Pt    0.2334    0.0372    0.9907
Pt    0.1766    0.9890    0.9901
Pt    0.1395    0.9902    0.2355
Pt    0.0371    0.1926    0.1450
Pt    0.1856    0.9968    0.1862
Pt    0.9918    0.1380    0.1385
Pt    0.9928    0.1939    0.1921
Pt    0.0018    0.1359    0.2322
Pt    0.0542    0.0842    0.2340
Pt    0.9986    0.0853    0.1910
Pt    0.2332    0.9975    0.1431
Pt    0.0455    0.0365    0.2868
Pt    0.0531    0.1878    0.3277
Pt    0.9952    0.0861    0.2795
Pt    0.2050    0.0469    0.3300
Pt    0.1012    0.0892    0.2806
Pt    0.1502    0.0417    0.2778
Pt    0.1461    0.0849    0.3353
Pt    0.0386    0.0812    0.3335
Pt    0.0429    0.1324    0.2846
Pt    0.0913    0.0409    0.3386
Pt    0.0887    0.1278    0.3360
Pt    0.1471    0.9949    0.3352
Pt    0.9996    0.1891    0.2890
Pt    0.0345    0.9970    0.3384
Pt    0.0941    0.0320    0.2403
Pt    0.9919    0.0293    0.2399
Pt    0.2397    0.9951    0.2445
Pt    0.0420    0.0375    0.3890
Pt    0.1452    0.0436    0.4831
Pt    0.0924    0.0347    0.4351
Pt    0.1913    0.0872    0.4874
Pt    0.1439    0.1799    0.4451
Pt    0.1377    0.0914    0.4339
Pt    0.1435    0.9896    0.4436
Pt    0.0383    0.1358    0.3771
Pt    0.0877    0.0870    0.3904
Pt    0.1917    0.1324    0.4368
Pt    0.0851    0.1837    0.3867
Pt    0.1891    0.0336    0.4356
Pt    0.0874    0.1395    0.4393
Pt    0.0434    0.2358    0.4805
Pt    0.1929    0.0775    0.3872
Pt    0.0332    0.1869    0.4341
Pt    0.2013    0.9968    0.3812
Pt    0.1405    0.0359    0.3882
Pt    0.0408    0.0908    0.4392
Pt    0.1420    0.1334    0.3834
Pt    0.0913    0.9899    0.4877
Pt    0.2371    0.0386    0.4855
Pt    0.0432    0.1383    0.4837
Pt    0.2360    0.2379    0.4885
Pt    0.0392    0.2358    0.3863
Pt    0.0897    0.1906    0.4795
Pt    0.0380    0.0421    0.4874
Pt    0.9905    0.0393    0.5389
Pt    0.0391    0.0367    0.5902
Pt    0.1421    0.1404    0.5851
Pt    0.1419    0.1886    0.5359
Pt    0.0891    0.0903    0.5898
Pt    0.0930    0.1929    0.5819
Pt    0.1446    0.0842    0.5411
Pt    0.1955    0.0813    0.5881
Pt    0.1910    0.1870    0.5866
Pt    0.1443    0.0346    0.5912
Pt    0.2353    0.1874    0.5405
Pt    0.0379    0.1356    0.5884
Pt    0.0939    0.0407    0.5403
Pt    0.0885    0.1429    0.5364
Pt    0.0408    0.1911    0.5319
Pt    0.1930    0.0348    0.5404
Pt    0.1930    0.1338    0.5401
Pt    0.0369    0.0930    0.5349
Pt    0.9905    0.0875    0.5911
Pt    0.0436    0.9929    0.5396
Pt    0.2400    0.1385    0.5907
Pt    0.9967    0.1915    0.5866
Pt    0.0912    0.0882    0.4958
Pt    0.9909    0.1387    0.5340
Pt    0.1384    0.1357    0.4895
Pt    0.1930    0.1837    0.4895
Pt    0.1387    0.1857    0.6331
Pt    0.1359    0.1370    0.6818
Pt    0.1475    0.0418    0.6860
Pt    0.1423    0.0865    0.6365
Pt    0.0890    0.0896    0.6848
Pt    0.0781    0.1944    0.6900
Pt    0.0378    0.1948    0.6390
Pt    0.1958    0.0931    0.6828
Pt    0.1834    0.1859    0.6872
Pt    0.0404    0.0901    0.6394
Pt    0.0354    0.1431    0.6889
Pt    0.0443    0.0438    0.6947
Pt    0.0941    0.0307    0.6423
Pt    0.0874    0.1442    0.6329
Pt    0.1857    0.1331    0.6348
Pt    0.1946    0.0290    0.6378
Pt    0.0425    0.0930    0.7372
Pt    0.0927    0.9939    0.6965
Pt    0.2371    0.0915    0.7384
Pt    0.0841    0.2385    0.6381
Pt    0.1861    0.1428    0.7350
Pt    0.1369    0.0901    0.7375
Pt    0.2394    0.1392    0.6847
Pt    0.9930    0.0888    0.6879
Pt    0.2376    0.1906    0.6370
Pt    0.1404    0.1924    0.7342
Pt    0.9909    0.2333    0.7377
Pt    0.1371    0.0968    0.8419
Pt    0.0878    0.0935    0.7899
Pt    0.0896    0.1855    0.7900
Pt    0.0395    0.0424    0.7917
Pt    0.1855    0.0997    0.7896
Pt    0.1860    0.1948    0.7902
Pt    0.2356    0.0924    0.8415
Pt    0.0398    0.9971    0.7389
Pt    0.1393    0.1451    0.7828
Pt    0.1355    0.0449    0.8000
Pt    0.1900    0.9907    0.7935
Pt    0.0835    0.0448    0.8406
Pt    0.1891    0.1456    0.8468
Pt    0.0797    0.1415    0.8451
Pt    0.1367    0.1959    0.8418
Pt    0.0357    0.1897    0.8324
Pt    0.0305    0.1301    0.8009
Pt    0.1903    0.0413    0.8438
Pt    0.2351    0.1945    0.7419
Pt    0.2347    0.1419    0.7932
Pt    0.1910    0.0489    0.7420
Pt    0.0869    0.1409    0.7389
Pt    0.0385    0.1848    0.7488
Pt    0.0855    0.2388    0.8373
Pt    0.0884    0.0377    0.7491
Pt    0.2303    0.0473    0.7914
Pt    0.1424    0.9930    0.7435
Pt    0.2399    0.9905    0.7481
Pt    0.9917    0.0456    0.7394
Pt    0.1351    0.2378    0.7835
Pt    0.1340    0.1445    0.8924
Pt    0.0814    0.0903    0.8945
Pt    0.0847    0.1914    0.8893
Pt    0.1877    0.2356    0.9467
Pt    0.1851    0.0915    0.8897
Pt    0.1850    0.1941    0.8929
Pt    0.1408    0.1909    0.9480
Pt    0.0910    0.1432    0.9454
Pt    0.2370    0.1870    0.9438
Pt    0.1812    0.0435    0.9426
Pt    0.1806    0.1344    0.9447
Pt    0.1330    0.0379    0.8906
Pt    0.0369    0.1894    0.9398
Pt    0.1269    0.0873    0.9373
Pt    0.2286    0.1407    0.8963
Pt    0.2331    0.0906    0.9390
Pt    0.1849    0.9961    0.8844
Pt    0.2357    0.0388    0.8952
Pt    0.1468    0.4344    0.0961
Pt    0.0406    0.2900    0.0400
Pt    0.1443    0.3876    0.0457
Pt    0.1470    0.2847    0.0445
Pt    0.1455    0.3383    0.0918
Pt    0.0917    0.4364    0.0399
Pt    0.0963    0.3363    0.0408
Pt    0.0938    0.2897    0.0881
Pt    0.1920    0.4342    0.0379
Pt    0.0941    0.3829    0.0930
Pt    0.0545    0.4372    0.1007
Pt    0.1971    0.3365    0.0457
Pt    0.0448    0.3292    0.0917
Pt    0.1913    0.4851    0.0912
Pt    0.1961    0.3818    0.0976
Pt    0.0408    0.3795    0.0492
Pt    0.1897    0.3855    0.9932
Pt    0.1348    0.3368    0.9905
Pt    0.9937    0.4396    0.0406
Pt    0.0871    0.2831    0.9958
Pt    0.1928    0.2822    0.9991
Pt    0.1454    0.4867    0.0433
Pt    0.0388    0.3359    0.9905
Pt    0.2371    0.2398    0.0034
Pt    0.1404    0.2400    0.9964
Pt    0.0944    0.3934    0.9931
Pt    0.2372    0.3392    0.9920
Pt    0.1395    0.4346    0.9927
Pt    0.9909    0.4848    0.0948
Pt    0.0416    0.2412    0.0933
Pt    0.9918    0.2837    0.9968
Pt    0.9930    0.3872    0.0941
Pt    0.0946    0.4875    0.9904
Pt    0.0465    0.2780    0.1553
Pt    0.1532    0.3850    0.1455
Pt    0.1435    0.4356    0.1943
Pt    0.1081    0.3756    0.1948
Pt    0.0463    0.3411    0.1893
Pt    0.0506    0.4875    0.1413
Pt    0.0436    0.3822    0.1373
Pt    0.9946    0.3889    0.1813
Pt    0.1944    0.4412    0.1443
Pt    0.0432    0.4405    0.1881
Pt    0.0938    0.3333    0.1427
Pt    0.1000    0.4234    0.1453
Pt    0.9957    0.2853    0.1932
Pt    0.1995    0.4869    0.1884
Pt    0.9947    0.3331    0.1380
Pt    0.9973    0.4402    0.1407
Pt    0.0984    0.4803    0.1860
Pt    0.0387    0.3871    0.2358
Pt    0.9944    0.3408    0.2372
Pt    0.1438    0.4887    0.1365
Pt    0.1365    0.4810    0.3373
Pt    0.2383    0.3897    0.3419
Pt    0.1882    0.4352    0.3435
Pt    0.1877    0.4777    0.2921
Pt    0.0824    0.4871    0.2961
Pt    0.9930    0.4348    0.2428
Pt    0.0894    0.4354    0.2403
Pt    0.1379    0.4822    0.2413
Pt    0.9932    0.2429    0.2445
Pt    0.9958    0.2410    0.3308
Pt    0.2387    0.4829    0.2455
Pt    0.0437    0.4863    0.2416
Pt    0.1827    0.4488    0.4537
Pt    0.0873    0.2936    0.4801
Pt    0.1890    0.3891    0.4831
Pt    0.1935    0.3385    0.4342
Pt    0.1842    0.4056    0.4061
Pt    0.1411    0.2934    0.4308
Pt    0.0450    0.2874    0.4293
Pt    0.0962    0.2402    0.4340
Pt    0.1870    0.4840    0.3893
Pt    0.1865    0.2894    0.4805
Pt    0.9933    0.2846    0.4850
Pt    0.1374    0.3422    0.4756
Pt    0.1393    0.2405    0.4825
Pt    0.9953    0.2431    0.4315
Pt    0.0389    0.3360    0.5819
Pt    0.0853    0.2905    0.5825
Pt    0.0816    0.3890    0.5837
Pt    0.1852    0.2963    0.5899
Pt    0.1845    0.3945    0.5887
Pt    0.1359    0.4406    0.5931
Pt    0.0924    0.3429    0.5350
Pt    0.1847    0.3392    0.5337
Pt    0.1805    0.4466    0.5435
Pt    0.0434    0.2927    0.5284
Pt    0.1383    0.2898    0.5397
Pt    0.1400    0.3895    0.5330
Pt    0.2363    0.2882    0.5326
Pt    0.0387    0.2432    0.5798
Pt    0.1355    0.3410    0.5892
Pt    0.1858    0.2414    0.5324
Pt    0.1382    0.2464    0.5923
Pt    0.0926    0.2414    0.5292
Pt    0.2371    0.2409    0.5818
Pt    0.2361    0.3374    0.4916
Pt    0.2370    0.4355    0.4941
Pt    0.2332    0.4452    0.5874
Pt    0.2314    0.3856    0.5432
Pt    0.2367    0.3360    0.5858
Pt    0.1950    0.2396    0.6376
Pt    0.1336    0.4378    0.6886
Pt    0.0866    0.2917    0.6825
Pt    0.0889    0.3874    0.6903
Pt    0.0348    0.3368    0.6896
Pt    0.1870    0.2904    0.6889
Pt    0.1977    0.4009    0.6830
Pt    0.0932    0.3425    0.7346
Pt    0.1486    0.3451    0.6910
Pt    0.0853    0.3405    0.6342
Pt    0.0895    0.4406    0.6361
Pt    0.1890    0.3418    0.6404
Pt    0.1880    0.4504    0.6401
Pt    0.0313    0.2868    0.6386
Pt    0.0384    0.3945    0.6313
Pt    0.1400    0.2939    0.6413
Pt    0.1431    0.3913    0.6464
Pt    0.0339    0.4305    0.6835
Pt    0.1343    0.2877    0.7334
Pt    0.1373    0.2450    0.6802
Pt    0.2366    0.3916    0.6332
Pt    0.1900    0.4439    0.7293
Pt    0.0849    0.4865    0.6843
Pt    0.0842    0.4469    0.7376
Pt    0.0432    0.3900    0.7380
Pt    0.0303    0.2440    0.6864
Pt    0.2387    0.2896    0.6413
Pt    0.9911    0.3430    0.6313
Pt    0.1955    0.3462    0.7386
Pt    0.1441    0.4421    0.7804
Pt    0.1400    0.3380    0.7845
Pt    0.0420    0.4363    0.7866
Pt    0.0863    0.2904    0.7872
Pt    0.0890    0.3916    0.7863
Pt    0.0347    0.2872    0.8382
Pt    0.1848    0.2877    0.7903
Pt    0.1946    0.3930    0.7912
Pt    0.1358    0.2851    0.8373
Pt    0.0332    0.3385    0.7898
Pt    0.1944    0.4433    0.8305
Pt    0.0395    0.3917    0.8435
Pt    0.1411    0.3839    0.8339
Pt    0.1943    0.3313    0.8431
Pt    0.0855    0.3447    0.8349
Pt    0.0942    0.4358    0.8359
Pt    0.2386    0.2829    0.8375
Pt    0.1860    0.2410    0.8467
Pt    0.0350    0.2419    0.7888
Pt    0.2390    0.3460    0.7921
Pt    0.9916    0.3866    0.7917
Pt    0.9910    0.3401    0.8425
Pt    0.1861    0.2431    0.7396
Pt    0.1434    0.3906    0.7417
Pt    0.9985    0.4427    0.8422
Pt    0.2362    0.2398    0.7889
Pt    0.0368    0.2938    0.7398
Pt    0.9904    0.3507    0.7412
Pt    0.9913    0.4831    0.7902
Pt    0.0818    0.2410    0.7398
Pt    0.9910    0.2403    0.8385
Pt    0.1479    0.4399    0.8793
Pt    0.1402    0.3435    0.8932
Pt    0.0479    0.4378    0.8927
Pt    0.0891    0.2955    0.8896
Pt    0.0956    0.3896    0.8857
Pt    0.1393    0.3875    0.9404
Pt    0.1893    0.2878    0.8952
Pt    0.1946    0.3903    0.8896
Pt    0.1373    0.2899    0.9417
Pt    0.0384    0.3373    0.8888
Pt    0.1345    0.2435    0.8944
Pt    0.0853    0.3359    0.9429
Pt    0.0989    0.4380    0.9336
Pt    0.1873    0.3336    0.9392
Pt    0.1917    0.4316    0.9453
Pt    0.0318    0.2914    0.9402
Pt    0.0445    0.3894    0.9380
Pt    0.0471    0.4344    0.9846
Pt    0.1948    0.4855    0.8917
Pt    0.2371    0.2396    0.8940
Pt    0.0373    0.2414    0.8919
Pt    0.1467    0.4850    0.9359
Pt    0.2383    0.2878    0.9461
Pt    0.2379    0.3395    0.8932
Pt    0.9919    0.3439    0.9394
Pt    0.9932    0.4873    0.9885
Pt    0.9913    0.2397    0.9377
Pt    0.0922    0.2425    0.9470
Pt    0.9955    0.3904    0.9873
Pt    0.1940    0.4820    0.9885
Pt    0.1428    0.6420    0.0878
Pt    0.1985    0.5350    0.0372
Pt    0.1476    0.5427    0.0909
Pt    0.0372    0.5422    0.0886
Pt    0.1445    0.6882    0.0289
Pt    0.0915    0.5892    0.0870
Pt    0.1409    0.5914    0.0445
Pt    0.0840    0.6848    0.0893
Pt    0.0352    0.6836    0.0448
Pt    0.1961    0.5846    0.0899
Pt    0.0375    0.5916    0.0381
Pt    0.1919    0.6909    0.0914
Pt    0.0385    0.6345    0.0957
Pt    0.1878    0.6393    0.0393
Pt    0.0890    0.5446    0.0336
Pt    0.0910    0.6413    0.0384
Pt    0.1448    0.5387    0.9922
Pt    0.1018    0.5937    0.9934
Pt    0.0962    0.7304    0.0374
Pt    0.0370    0.7381    0.0999
Pt    0.2356    0.6850    0.0357
Pt    0.1349    0.7328    0.0869
Pt    0.9909    0.5933    0.9913
Pt    0.1826    0.7381    0.0363
Pt    0.0412    0.4895    0.0365
Pt    0.0945    0.4928    0.0836
Pt    0.0451    0.7359    0.9896
Pt    0.2390    0.6370    0.0852
Pt    0.9941    0.5414    0.0345
Pt    0.0361    0.6866    0.1432
Pt    0.1423    0.6295    0.1944
Pt    0.0865    0.5870    0.1971
Pt    0.0877    0.6902    0.1910
Pt    0.1897    0.5829    0.1904
Pt    0.1926    0.6803    0.1909
Pt    0.1462    0.5303    0.1903
Pt    0.0370    0.6410    0.1935
Pt    0.0396    0.5354    0.1879
Pt    0.0891    0.6396    0.2366
Pt    0.0946    0.5391    0.1334
Pt    0.1434    0.5841    0.1438
Pt    0.0931    0.6393    0.1406
Pt    0.0395    0.5885    0.1421
Pt    0.1972    0.5388    0.1415
Pt    0.1414    0.6891    0.1486
Pt    0.1877    0.6377    0.1395
Pt    0.0944    0.7355    0.1386
Pt    0.2363    0.5831    0.2365
Pt    0.9919    0.5365    0.1342
Pt    0.1369    0.6840    0.2343
Pt    0.9924    0.5855    0.1923
Pt    0.9901    0.4889    0.1918
Pt    0.0393    0.7344    0.1917
Pt    0.0896    0.5328    0.2380
Pt    0.2389    0.7362    0.2919
Pt    0.2298    0.5887    0.3513
Pt    0.0860    0.5793    0.2927
Pt    0.0938    0.6881    0.2892
Pt    0.1929    0.5772    0.2952
Pt    0.1811    0.6804    0.2883
Pt    0.1352    0.6286    0.2876
Pt    0.0799    0.5382    0.3433
Pt    0.0912    0.6372    0.3357
Pt    0.1857    0.5306    0.3383
Pt    0.1806    0.6331    0.3372
Pt    0.0384    0.5909    0.3391
Pt    0.0346    0.6884    0.3403
Pt    0.1323    0.5790    0.3460
Pt    0.1427    0.6951    0.3376
Pt    0.0394    0.5816    0.2416
Pt    0.2373    0.6255    0.2876
Pt    0.0289    0.5320    0.2956
Pt    0.0386    0.6310    0.2894
Pt    0.1361    0.5313    0.2925
Pt    0.9921    0.5360    0.2397
Pt    0.0308    0.6836    0.2456
Pt    0.2274    0.6809    0.3381
Pt    0.0467    0.7362    0.2892
Pt    0.1409    0.5745    0.2423
Pt    0.9904    0.7348    0.2396
Pt    0.1897    0.5322    0.2477
Pt    0.0918    0.7381    0.3365
Pt    0.1945    0.7381    0.3415
Pt    0.1935    0.6378    0.2407
Pt    0.1896    0.7312    0.2389
Pt    0.0844    0.5950    0.3868
Pt    0.0932    0.6945    0.3855
Pt    0.1779    0.5912    0.3966
Pt    0.1859    0.6947    0.3949
Pt    0.2356    0.5368    0.3932
Pt    0.1896    0.5298    0.4471
Pt    0.1777    0.6432    0.4395
Pt    0.1321    0.6932    0.4400
Pt    0.2332    0.6385    0.3973
Pt    0.1390    0.6436    0.3858
Pt    0.1341    0.5271    0.3882
Pt    0.0030    0.7255    0.4424
Pt    0.2298    0.5934    0.4388
Pt    0.1968    0.7363    0.4465
Pt    0.0396    0.7365    0.3880
Pt    0.9941    0.7289    0.5355
Pt    0.0517    0.7339    0.4924
Pt    0.2397    0.5934    0.5406
Pt    0.1817    0.4915    0.5851
Pt    0.2324    0.5388    0.5858
Pt    0.2362    0.6443    0.4998
Pt    0.1914    0.6923    0.5034
Pt    0.9939    0.6902    0.5945
Pt    0.0985    0.7355    0.5455
Pt    0.2349    0.4890    0.5349
Pt    0.1437    0.7374    0.5004
Pt    0.2399    0.5476    0.4917
Pt    0.0406    0.7389    0.5953
Pt    0.0900    0.5391    0.7328
Pt    0.1337    0.4984    0.6359
Pt    0.0417    0.5374    0.6845
Pt    0.9959    0.6928    0.6911
Pt    0.0480    0.6941    0.6480
Pt    0.0378    0.6407    0.6924
Pt    0.1306    0.5423    0.6848
Pt    0.1452    0.4963    0.7337
Pt    0.1386    0.5894    0.7370
Pt    0.2342    0.4957    0.7292
Pt    0.1857    0.5120    0.6866
Pt    0.2355    0.4979    0.6394
Pt    0.0398    0.5903    0.7354
Pt    0.0396    0.6389    0.7896
Pt    0.1929    0.4938    0.7858
Pt    0.0938    0.5985    0.7845
Pt    0.1868    0.6004    0.7910
Pt    0.0372    0.5401    0.7886
Pt    0.0439    0.6830    0.7425
Pt    0.1413    0.5479    0.7848
Pt    0.1373    0.5959    0.8358
Pt    0.0439    0.5891    0.8406
Pt    0.0951    0.5386    0.8370
Pt    0.0937    0.6502    0.8324
Pt    0.0360    0.6882    0.8416
Pt    0.1922    0.5477    0.8355
Pt    0.9917    0.6420    0.7432
Pt    0.0993    0.4924    0.7827
Pt    0.0428    0.7369    0.7900
Pt    0.1390    0.4897    0.8360
Pt    0.1927    0.5452    0.7415
Pt    0.0475    0.4907    0.8318
Pt    0.0375    0.4974    0.7393
Pt    0.0923    0.4924    0.8860
Pt    0.2397    0.5409    0.8886
Pt    0.0920    0.5878    0.8880
Pt    0.0933    0.6821    0.8901
Pt    0.1970    0.5914    0.8890
Pt    0.1486    0.6335    0.8902
Pt    0.1508    0.6414    0.9822
Pt    0.0936    0.5404    0.9379
Pt    0.1004    0.6346    0.9379
Pt    0.1965    0.5314    0.9422
Pt    0.1981    0.6409    0.9314
Pt    0.0427    0.5891    0.9360
Pt    0.0458    0.6919    0.9383
Pt    0.1471    0.5831    0.9370
Pt    0.1456    0.6949    0.9366
Pt    0.1504    0.5383    0.8839
Pt    0.0412    0.5418    0.8845
Pt    0.0452    0.6367    0.8876
Pt    0.9941    0.6458    0.9371
Pt    0.9932    0.4903    0.8901
Pt    0.0408    0.6368    0.9887
Pt    0.1978    0.5911    0.9814
Pt    0.9902    0.5389    0.9358
Pt    0.1961    0.7037    0.9800
Pt    0.0965    0.6872    0.9839
Pt    0.9920    0.5914    0.8880
Pt    0.9968    0.6902    0.9885
Pt    0.0418    0.5444    0.9862
Pt    0.0434    0.4909    0.9405
Pt    0.2192    0.8917    0.0363
Pt    0.0870    0.7851    0.0953
Pt    0.1394    0.8437    0.0918
Pt    0.1845    0.7892    0.0879
Pt    0.1850    0.8954    0.0938
Pt    0.2336    0.8500    0.0848
Pt    0.2346    0.9469    0.0879
Pt    0.0303    0.8407    0.0948
Pt    0.1759    0.8366    0.0352
Pt    0.0392    0.7795    0.0481
Pt    0.1356    0.7872    0.0449
Pt    0.2365    0.7911    0.0397
Pt    0.2294    0.9498    0.9953
Pt    0.2347    0.7390    0.0968
Pt    0.1901    0.7870    0.9889
Pt    0.1412    0.7435    0.1903
Pt    0.1898    0.9413    0.2331
Pt    0.0913    0.7873    0.1870
Pt    0.0886    0.8858    0.1893
Pt    0.1904    0.7883    0.1935
Pt    0.1923    0.8912    0.1856
Pt    0.2359    0.8342    0.1907
Pt    0.1405    0.9399    0.1901
Pt    0.1396    0.8407    0.1866
Pt    0.0433    0.9869    0.2349
Pt    0.0488    0.9382    0.1934
Pt    0.1845    0.9491    0.1402
Pt    0.0374    0.8412    0.1888
Pt    0.0851    0.8450    0.1312
Pt    0.0390    0.7849    0.1469
Pt    0.0342    0.8960    0.1429
Pt    0.1381    0.7939    0.1352
Pt    0.1400    0.8907    0.1432
Pt    0.1870    0.8320    0.1411
Pt    0.1445    0.8849    0.2356
Pt    0.2396    0.7893    0.1426
Pt    0.2394    0.8928    0.1373
Pt    0.0387    0.8900    0.2361
Pt    0.9913    0.9859    0.1862
Pt    0.0911    0.8409    0.2377
Pt    0.2395    0.9459    0.1879
Pt    0.1835    0.7396    0.1369
Pt    0.2396    0.7394    0.1917
Pt    0.0943    0.9384    0.2385
Pt    0.9908    0.9855    0.2857
Pt    0.0388    0.8353    0.2891
Pt    0.0931    0.7893    0.2901
Pt    0.0922    0.8860    0.2865
Pt    0.1925    0.7835    0.2905
Pt    0.1915    0.8899    0.2871
Pt    0.1423    0.9326    0.2874
Pt    0.1441    0.8390    0.2874
Pt    0.0482    0.9368    0.2901
Pt    0.1468    0.8861    0.3367
Pt    0.0940    0.8405    0.3359
Pt    0.0979    0.9350    0.3367
Pt    0.1469    0.7906    0.3363
Pt    0.1916    0.8382    0.3432
Pt    0.1935    0.9394    0.3338
Pt    0.0414    0.7877    0.3402
Pt    0.0392    0.8915    0.3376
Pt    0.1406    0.7930    0.2410
Pt    0.9910    0.9375    0.3397
Pt    0.1917    0.9875    0.2858
Pt    0.0381    0.7894    0.2411
Pt    0.2385    0.8360    0.2874
Pt    0.1433    0.7396    0.2833
Pt    0.0881    0.9861    0.2916
Pt    0.9971    0.8872    0.2887
Pt    0.1937    0.8381    0.2395
Pt    0.0921    0.7426    0.2391
Pt    0.0406    0.8408    0.3925
Pt    0.0916    0.9425    0.4363
Pt    0.1384    0.8365    0.3851
Pt    0.1410    0.8889    0.4387
Pt    0.0877    0.7971    0.3835
Pt    0.1470    0.7872    0.4435
Pt    0.0916    0.8924    0.3821
Pt    0.0467    0.8882    0.4415
Pt    0.1920    0.7856    0.3877
Pt    0.0389    0.7935    0.4344
Pt    0.1911    0.8890    0.3899
Pt    0.1942    0.9417    0.4378
Pt    0.1515    0.9433    0.3849
Pt    0.1961    0.8397    0.4374
Pt    0.0953    0.8354    0.4379
Pt    0.0403    0.9333    0.3943
Pt    0.0801    0.9852    0.3814
Pt    0.9953    0.7861    0.4846
Pt    0.0379    0.9877    0.4364
Pt    0.0440    0.9388    0.4860
Pt    0.9952    0.9870    0.4882
Pt    0.1972    0.8884    0.4887
Pt    0.0909    0.7450    0.4384
Pt    0.1387    0.7478    0.3870
Pt    0.1473    0.9368    0.4887
Pt    0.9922    0.9373    0.4396
Pt    0.1895    0.9863    0.4884
Pt    0.1953    0.9844    0.5912
Pt    0.1965    0.7874    0.4902
Pt    0.0857    0.7893    0.5868
Pt    0.0877    0.8866    0.5886
Pt    0.1864    0.8884    0.5940
Pt    0.1495    0.8288    0.6015
Pt    0.0994    0.7871    0.4913
Pt    0.1462    0.8358    0.4897
Pt    0.0417    0.9380    0.5875
Pt    0.0865    0.8350    0.5434
Pt    0.0926    0.9310    0.5326
Pt    0.1986    0.8421    0.5391
Pt    0.1895    0.9357    0.5416
Pt    0.0421    0.7813    0.5376
Pt    0.0407    0.8917    0.5383
Pt    0.1464    0.7903    0.5435
Pt    0.1422    0.8831    0.5449
Pt    0.1432    0.9365    0.5930
Pt    0.0409    0.8367    0.5909
Pt    0.0919    0.9831    0.5939
Pt    0.9963    0.9455    0.5427
Pt    0.0424    0.8344    0.4930
Pt    0.2386    0.9311    0.6065
Pt    0.9958    0.8405    0.5363
Pt    0.1379    0.9840    0.5378
Pt    0.0951    0.8869    0.4889
Pt    0.9922    0.7891    0.6907
Pt    0.0441    0.9318    0.6921
Pt    0.0877    0.7941    0.6927
Pt    0.0986    0.8848    0.6948
Pt    0.9934    0.8412    0.7388
Pt    0.1432    0.9381    0.6993
Pt    0.1436    0.9835    0.6425
Pt    0.0344    0.8407    0.6834
Pt    0.1377    0.8332    0.6944
Pt    0.0943    0.8366    0.6381
Pt    0.0900    0.9320    0.6461
Pt    0.1874    0.9307    0.6503
Pt    0.0391    0.7919    0.6381
Pt    0.0426    0.8872    0.6372
Pt    0.1417    0.8889    0.6385
Pt    0.9960    0.9380    0.6375
Pt    0.0412    0.9856    0.6383
Pt    0.1905    0.9868    0.6900
Pt    0.0875    0.7514    0.6410
Pt    0.9921    0.8925    0.6917
Pt    0.0465    0.7393    0.7021
Pt    0.0930    0.8427    0.7450
Pt    0.0419    0.8442    0.7933
Pt    0.1405    0.9375    0.7871
Pt    0.0014    0.7936    0.7878
Pt    0.9928    0.8365    0.8357
Pt    0.1965    0.9418    0.7454
Pt    0.1872    0.9443    0.8403
Pt    0.0896    0.9411    0.7457
Pt    0.9922    0.9465    0.7439
Pt    0.1436    0.8832    0.7431
Pt    0.9981    0.9034    0.7988
Pt    0.0498    0.7885    0.7435
Pt    0.1358    0.9873    0.8387
Pt    0.0417    0.8948    0.7485
Pt    0.0886    0.9852    0.7943
Pt    0.9994    0.7480    0.8437
Pt    0.9995    0.7431    0.7432
Pt    0.2379    0.9410    0.8827
Pt    0.1843    0.9412    0.9293
Pt    0.2300    0.8994    0.9453
Pt    0.1405    0.7497    0.9816
Pt    0.2265    0.8451    0.9851
Pt    0.9926    0.7401    0.9365
Pt    0.2330    0.9850    0.9385
Pt    0.0449    0.7403    0.8937
Pt    0.4359    0.1395    0.0845
Pt    0.4380    0.9965    0.0411
Pt    0.4829    0.1888    0.0858
Pt    0.2851    0.0928    0.0962
Pt    0.2814    0.1360    0.0373
Pt    0.3326    0.1396    0.1025
Pt    0.3390    0.1864    0.0399
Pt    0.4831    0.9917    0.9946
Pt    0.3829    0.0903    0.0975
Pt    0.3859    0.0445    0.0416
Pt    0.3844    0.1901    0.0881
Pt    0.4355    0.0424    0.0933
Pt    0.3292    0.0883    0.0485
Pt    0.4308    0.0947    0.0384
Pt    0.3797    0.1354    0.0450
Pt    0.4426    0.1905    0.0319
Pt    0.3341    0.0353    0.0895
Pt    0.2818    0.0354    0.0366
Pt    0.4806    0.0921    0.0898
Pt    0.3883    0.1935    0.9984
Pt    0.3384    0.9965    0.0419
Pt    0.4843    0.1380    0.0340
Pt    0.2845    0.9923    0.0883
Pt    0.4840    0.0474    0.0410
Pt    0.3928    0.9896    0.0935
Pt    0.2824    0.1903    0.9970
Pt    0.3864    0.9905    0.9902
Pt    0.4867    0.2387    0.0457
Pt    0.4777    0.0908    0.9904
Pt    0.2415    0.0420    0.0920
Pt    0.4854    0.1403    0.1395
Pt    0.2913    0.0863    0.1994
Pt    0.3362    0.9912    0.1402
Pt    0.3903    0.0840    0.1978
Pt    0.3872    0.1858    0.1965
Pt    0.4402    0.1400    0.1921
Pt    0.3406    0.1332    0.1971
Pt    0.4882    0.1877    0.1881
Pt    0.2750    0.0486    0.1499
Pt    0.4370    0.1899    0.1390
Pt    0.3879    0.0394    0.1436
Pt    0.4363    0.0932    0.1416
Pt    0.3883    0.1390    0.1457
Pt    0.3354    0.0834    0.1465
Pt    0.4422    0.0360    0.1859
Pt    0.3448    0.0330    0.1959
Pt    0.2903    0.9930    0.1855
Pt    0.4851    0.0892    0.1840
Pt    0.4862    0.0362    0.1347
Pt    0.3945    0.2354    0.1383
Pt    0.3386    0.0443    0.2937
Pt    0.4826    0.0423    0.2403
Pt    0.3953    0.0403    0.2468
Pt    0.3448    0.0831    0.2417
Pt    0.3481    0.9891    0.2454
Pt    0.2664    0.0479    0.3055
Pt    0.4367    0.1437    0.2911
Pt    0.4869    0.0909    0.2889
Pt    0.4359    0.1913    0.2426
Pt    0.3890    0.1325    0.2469
Pt    0.4848    0.1862    0.2879
Pt    0.4449    0.0950    0.2403
Pt    0.2966    0.0335    0.2401
Pt    0.2481    0.9909    0.3345
Pt    0.4425    0.2383    0.2930
Pt    0.4351    0.2386    0.3914
Pt    0.2929    0.0361    0.4370
Pt    0.2592    0.0472    0.3710
Pt    0.2848    0.1857    0.4878
Pt    0.4342    0.2349    0.4811
Pt    0.2438    0.0850    0.4293
Pt    0.2973    0.9903    0.3906
Pt    0.2403    0.1317    0.4858
Pt    0.4782    0.1763    0.3647
Pt    0.2888    0.0881    0.5844
Pt    0.2880    0.1887    0.5864
Pt    0.3858    0.1912    0.5862
Pt    0.4877    0.2256    0.5394
Pt    0.2801    0.1384    0.5344
Pt    0.3929    0.2332    0.5387
Pt    0.3414    0.1367    0.5884
Pt    0.4412    0.1359    0.5858
Pt    0.3347    0.1839    0.5353
Pt    0.4413    0.1813    0.5376
Pt    0.4403    0.2354    0.5842
Pt    0.2456    0.0350    0.5832
Pt    0.2912    0.9972    0.4905
Pt    0.2469    0.0833    0.5330
Pt    0.3357    0.2352    0.5832
Pt    0.3376    0.2357    0.4930
Pt    0.2870    0.2366    0.5338
Pt    0.4900    0.1832    0.5908
Pt    0.2424    0.0337    0.6902
Pt    0.2909    0.0858    0.6933
Pt    0.2903    0.1878    0.6886
Pt    0.3883    0.0889    0.6886
Pt    0.3888    0.1844    0.6883
Pt    0.3390    0.2328    0.6864
Pt    0.4425    0.1357    0.6827
Pt    0.2949    0.0353    0.6344
Pt    0.2903    0.1384    0.6337
Pt    0.3365    0.1892    0.7384
Pt    0.3899    0.1284    0.6341
Pt    0.2448    0.0850    0.6432
Pt    0.4408    0.0332    0.6898
Pt    0.3386    0.1366    0.6891
Pt    0.3384    0.0851    0.6333
Pt    0.3435    0.1853    0.6396
Pt    0.4419    0.0890    0.6324
Pt    0.4391    0.1820    0.6337
Pt    0.3397    0.0353    0.6889
Pt    0.3923    0.2363    0.6361
Pt    0.4445    0.0870    0.7291
Pt    0.3925    0.1409    0.7341
Pt    0.4366    0.1897    0.7370
Pt    0.3404    0.9920    0.7350
Pt    0.4859    0.2385    0.6402
Pt    0.2499    0.9905    0.6332
Pt    0.3359    0.0945    0.8373
Pt    0.2894    0.0949    0.7873
Pt    0.2862    0.1916    0.7867
Pt    0.4395    0.1918    0.8402
Pt    0.3922    0.0897    0.7954
Pt    0.3893    0.1921    0.7853
Pt    0.3917    0.1424    0.8348
Pt    0.4423    0.0914    0.8354
Pt    0.4384    0.1398    0.7917
Pt    0.3435    0.0424    0.7861
Pt    0.2891    0.0400    0.8347
Pt    0.3425    0.1443    0.7853
Pt    0.2854    0.1413    0.8449
Pt    0.4456    0.0465    0.7903
Pt    0.3350    0.1874    0.8338
Pt    0.3837    0.0414    0.8376
Pt    0.4390    0.9941    0.7395
Pt    0.4825    0.9950    0.7903
Pt    0.3881    0.2384    0.7419
Pt    0.2905    0.0413    0.7480
Pt    0.2845    0.1422    0.7412
Pt    0.3822    0.9910    0.7911
Pt    0.3383    0.9939    0.8400
Pt    0.3962    0.0501    0.7415
Pt    0.3416    0.0931    0.7401
Pt    0.4343    0.9958    0.8394
Pt    0.4893    0.1894    0.7857
Pt    0.2402    0.1931    0.8386
Pt    0.3372    0.2385    0.7978
Pt    0.3336    0.1379    0.8897
Pt    0.2846    0.0875    0.8907
Pt    0.2872    0.1883    0.8915
Pt    0.3371    0.0369    0.8921
Pt    0.3818    0.0918    0.8835
Pt    0.3891    0.1896    0.8882
Pt    0.4319    0.1958    0.9402
Pt    0.4390    0.0878    0.9364
Pt    0.4396    0.1366    0.8867
Pt    0.2831    0.0365    0.9405
Pt    0.2894    0.1412    0.9432
Pt    0.3401    0.1969    0.9449
Pt    0.3903    0.0401    0.9388
Pt    0.3868    0.1456    0.9342
Pt    0.3382    0.0939    0.9401
Pt    0.4333    0.0434    0.8900
Pt    0.4294    0.1381    0.9883
Pt    0.4302    0.0435    0.9865
Pt    0.4829    0.0404    0.9405
Pt    0.4886    0.9928    0.8852
Pt    0.4815    0.1413    0.9398
Pt    0.2868    0.9913    0.8888
Pt    0.4372    0.9903    0.9426
Pt    0.2817    0.0878    0.9834
Pt    0.2807    0.2370    0.9484
Pt    0.4889    0.1928    0.9786
Pt    0.3368    0.1413    0.9874
Pt    0.3343    0.0388    0.9883
Pt    0.3820    0.0902    0.9884
Pt    0.3893    0.9897    0.8894
Pt    0.2906    0.9890    0.9888
Pt    0.2904    0.4819    0.0773
Pt    0.4305    0.2446    0.0831
Pt    0.4801    0.2930    0.0836
Pt    0.2433    0.4367    0.0902
Pt    0.3298    0.2428    0.9963
Pt    0.2576    0.4323    0.9946
Pt    0.3892    0.2517    0.0245
Pt    0.2442    0.4821    0.0339
Pt    0.2456    0.3827    0.0435
Pt    0.3041    0.4825    0.9909
Pt    0.4892    0.3345    0.1451
Pt    0.4857    0.3882    0.1892
Pt    0.3969    0.4309    0.2289
Pt    0.4353    0.2898    0.1444
Pt    0.4422    0.3339    0.1948
Pt    0.4424    0.4879    0.2313
Pt    0.3420    0.4370    0.1900
Pt    0.2933    0.4834    0.1924
Pt    0.3951    0.4866    0.1836
Pt    0.2532    0.4864    0.1374
Pt    0.4421    0.2423    0.1902
Pt    0.4425    0.3818    0.2353
Pt    0.3418    0.4889    0.1392
Pt    0.2985    0.3855    0.2942
Pt    0.4432    0.2896    0.2436
Pt    0.3940    0.3876    0.2904
Pt    0.3381    0.4379    0.2928
Pt    0.3509    0.3899    0.2472
Pt    0.2402    0.4849    0.3395
Pt    0.4365    0.4405    0.2825
Pt    0.2967    0.4382    0.3455
Pt    0.3866    0.3329    0.3428
Pt    0.3948    0.4314    0.3370
Pt    0.4437    0.3336    0.2979
Pt    0.4450    0.3874    0.3375
Pt    0.3380    0.3801    0.3468
Pt    0.4440    0.2800    0.3391
Pt    0.3494    0.4812    0.2416
Pt    0.2962    0.4382    0.2421
Pt    0.2467    0.4348    0.2940
Pt    0.4877    0.3907    0.2859
Pt    0.2427    0.3876    0.4389
Pt    0.2870    0.3825    0.3871
Pt    0.2446    0.4381    0.3894
Pt    0.3917    0.3391    0.4348
Pt    0.3509    0.4416    0.3898
Pt    0.3908    0.2866    0.3848
Pt    0.3460    0.2777    0.4339
Pt    0.3930    0.3880    0.3905
Pt    0.3402    0.3332    0.4849
Pt    0.2913    0.2883    0.4768
Pt    0.3967    0.4379    0.4420
Pt    0.4366    0.3852    0.4420
Pt    0.3410    0.3278    0.3931
Pt    0.3408    0.3835    0.4385
Pt    0.4473    0.4327    0.3888
Pt    0.4464    0.2870    0.4372
Pt    0.4413    0.3356    0.3905
Pt    0.2876    0.3376    0.4364
Pt    0.2952    0.4410    0.4342
Pt    0.4875    0.4421    0.4403
Pt    0.4893    0.2802    0.3892
Pt    0.4395    0.4870    0.4425
Pt    0.3917    0.2864    0.4855
Pt    0.2908    0.3811    0.4879
Pt    0.2836    0.2923    0.5894
Pt    0.2899    0.3893    0.5841
Pt    0.4899    0.3902    0.5936
Pt    0.3847    0.2835    0.5818
Pt    0.3894    0.3855    0.5837
Pt    0.4434    0.3865    0.5420
Pt    0.4359    0.4323    0.5940
Pt    0.4329    0.3393    0.5878
Pt    0.3385    0.4350    0.5860
Pt    0.2929    0.3352    0.5390
Pt    0.2882    0.4333    0.5376
Pt    0.3871    0.3348    0.5358
Pt    0.3961    0.4409    0.5425
Pt    0.3397    0.3319    0.5856
Pt    0.4429    0.2823    0.5407
Pt    0.3387    0.2865    0.5356
Pt    0.3393    0.3865    0.5346
Pt    0.4864    0.4394    0.5484
Pt    0.4884    0.2799    0.4961
Pt    0.4415    0.3380    0.4919
Pt    0.3928    0.3881    0.4941
Pt    0.3399    0.4878    0.5382
Pt    0.4445    0.4405    0.4946
Pt    0.3377    0.4348    0.4904
Pt    0.3902    0.4888    0.5922
Pt    0.2891    0.2900    0.6854
Pt    0.2947    0.3914    0.6955
Pt    0.4847    0.3370    0.6392
Pt    0.3853    0.2828    0.6877
Pt    0.3815    0.3855    0.6825
Pt    0.4370    0.2855    0.6361
Pt    0.4350    0.4411    0.6934
Pt    0.4284    0.3353    0.6896
Pt    0.4396    0.3838    0.6458
Pt    0.2796    0.3405    0.6419
Pt    0.2820    0.4443    0.6342
Pt    0.3863    0.3455    0.6340
Pt    0.3811    0.4402    0.6391
Pt    0.3433    0.4462    0.6925
Pt    0.3368    0.3347    0.6800
Pt    0.3378    0.2886    0.6372
Pt    0.3312    0.3881    0.6391
Pt    0.2456    0.4460    0.6844
Pt    0.2874    0.2394    0.6333
Pt    0.2927    0.4481    0.7372
Pt    0.4368    0.2400    0.6898
Pt    0.3827    0.3391    0.7342
Pt    0.4851    0.4412    0.6458
Pt    0.2402    0.3447    0.6900
Pt    0.2955    0.3416    0.7333
Pt    0.2413    0.2418    0.6930
Pt    0.4898    0.2963    0.6939
Pt    0.3330    0.4886    0.6426
Pt    0.4847    0.3504    0.7378
Pt    0.2932    0.2952    0.7914
Pt    0.2901    0.3890    0.7929
Pt    0.3860    0.2409    0.8388
Pt    0.3880    0.2912    0.7949
Pt    0.3890    0.3908    0.7931
Pt    0.3915    0.4446    0.7467
Pt    0.4495    0.4514    0.8016
Pt    0.4369    0.3426    0.7863
Pt    0.3419    0.3904    0.8399
Pt    0.2921    0.3419    0.8438
Pt    0.2908    0.2424    0.8506
Pt    0.2923    0.4437    0.8422
Pt    0.4279    0.3903    0.7407
Pt    0.3891    0.3393    0.8406
Pt    0.3431    0.3985    0.7480
Pt    0.3951    0.4357    0.8412
Pt    0.3402    0.4476    0.7975
Pt    0.3427    0.3405    0.7877
Pt    0.4430    0.2922    0.8386
Pt    0.4370    0.3875    0.8379
Pt    0.3357    0.2918    0.8454
Pt    0.2408    0.4447    0.7849
Pt    0.3402    0.2844    0.7398
Pt    0.2429    0.2949    0.7449
Pt    0.4406    0.2901    0.7418
Pt    0.4843    0.4380    0.7395
Pt    0.4895    0.3409    0.8378
Pt    0.2825    0.2428    0.7432
Pt    0.2433    0.3972    0.7405
Pt    0.2442    0.3926    0.8438
Pt    0.4881    0.2929    0.7865
Pt    0.4396    0.2442    0.7907
Pt    0.2865    0.2922    0.8943
Pt    0.2941    0.3930    0.8930
Pt    0.2458    0.3909    0.9411
Pt    0.3883    0.2902    0.8854
Pt    0.3896    0.3907    0.8882
Pt    0.2953    0.3422    0.9385
Pt    0.3059    0.4316    0.9444
Pt    0.3365    0.2859    0.9358
Pt    0.3458    0.3449    0.8945
Pt    0.3431    0.4425    0.8943
Pt    0.3465    0.2397    0.8925
Pt    0.2420    0.4386    0.8941
Pt    0.2552    0.4810    0.9432
Pt    0.3894    0.2452    0.9532
Pt    0.4393    0.2429    0.8874
Pt    0.2898    0.2953    0.9858
Pt    0.4491    0.2519    0.9880
Pt    0.4412    0.6899    0.0363
Pt    0.2914    0.5807    0.0897
Pt    0.2460    0.5308    0.0915
Pt    0.2902    0.6906    0.0816
Pt    0.3940    0.5873    0.0854
Pt    0.3448    0.5304    0.0842
Pt    0.3959    0.6895    0.0900
Pt    0.3469    0.6417    0.0891
Pt    0.4493    0.6337    0.0780
Pt    0.2953    0.5327    0.0330
Pt    0.2909    0.6383    0.0368
Pt    0.3953    0.6356    0.0351
Pt    0.3446    0.5858    0.0452
Pt    0.3411    0.6882    0.0311
Pt    0.4382    0.7379    0.9913
Pt    0.2487    0.5835    0.0344
Pt    0.4450    0.7354    0.0883
Pt    0.3397    0.7324    0.0909
Pt    0.4883    0.6821    0.0827
Pt    0.2901    0.5859    0.1887
Pt    0.2923    0.6894    0.1880
Pt    0.3950    0.5869    0.1849
Pt    0.3916    0.6865    0.1861
Pt    0.4416    0.6389    0.1864
Pt    0.4435    0.5400    0.1836
Pt    0.2925    0.5353    0.1414
Pt    0.2463    0.5866    0.1397
Pt    0.2929    0.6344    0.1356
Pt    0.4888    0.6296    0.1313
Pt    0.3923    0.5324    0.1375
Pt    0.4418    0.5822    0.1310
Pt    0.3934    0.6339    0.1363
Pt    0.4414    0.6825    0.1374
Pt    0.3396    0.6305    0.1845
Pt    0.3460    0.5398    0.1873
Pt    0.3416    0.6885    0.1403
Pt    0.3400    0.5879    0.1266
Pt    0.3941    0.7367    0.1367
Pt    0.2408    0.6342    0.1884
Pt    0.4435    0.7354    0.1864
Pt    0.4474    0.5865    0.2311
Pt    0.2448    0.5385    0.1878
Pt    0.3494    0.7359    0.1913
Pt    0.3952    0.5359    0.2334
Pt    0.3424    0.6842    0.2362
Pt    0.3921    0.6420    0.2355
Pt    0.4464    0.6862    0.2336
Pt    0.3463    0.5850    0.2388
Pt    0.2439    0.6785    0.1409
Pt    0.2885    0.7366    0.1381
Pt    0.2916    0.5896    0.2858
Pt    0.2884    0.6935    0.2977
Pt    0.3968    0.5878    0.2858
Pt    0.3865    0.6892    0.2867
Pt    0.4374    0.6370    0.2812
Pt    0.4490    0.5375    0.2908
Pt    0.2913    0.5444    0.3471
Pt    0.2807    0.6328    0.3431
Pt    0.3951    0.5364    0.3440
Pt    0.3838    0.6353    0.3395
Pt    0.3374    0.6358    0.2853
Pt    0.3447    0.5369    0.2928
Pt    0.3388    0.5882    0.3395
Pt    0.3419    0.6868    0.3379
Pt    0.4467    0.5870    0.3358
Pt    0.4436    0.6856    0.3317
Pt    0.2911    0.7378    0.2417
Pt    0.2870    0.6452    0.2434
Pt    0.4492    0.4905    0.3354
Pt    0.2466    0.5361    0.2903
Pt    0.3426    0.4965    0.3459
Pt    0.3001    0.4893    0.2897
Pt    0.3970    0.4927    0.2878
Pt    0.2407    0.6881    0.2452
Pt    0.4482    0.7379    0.2861
Pt    0.3427    0.7354    0.2869
Pt    0.3922    0.7343    0.3398
Pt    0.4894    0.4899    0.2836
Pt    0.2949    0.5407    0.2418
Pt    0.3976    0.7377    0.2425
Pt    0.2847    0.5962    0.3997
Pt    0.4879    0.6427    0.4356
Pt    0.2917    0.6923    0.3828
Pt    0.3421    0.6366    0.3912
Pt    0.3970    0.5886    0.3906
Pt    0.3381    0.5497    0.3957
Pt    0.3935    0.6823    0.3842
Pt    0.4404    0.6934    0.4303
Pt    0.4462    0.5938    0.4322
Pt    0.4404    0.6367    0.3802
Pt    0.3408    0.6933    0.4361
Pt    0.4455    0.5388    0.3927
Pt    0.2865    0.5439    0.4401
Pt    0.2887    0.6432    0.4483
Pt    0.3933    0.5465    0.4359
Pt    0.3919    0.6439    0.4403
Pt    0.3344    0.5919    0.4442
Pt    0.2883    0.4899    0.4841
Pt    0.2424    0.4895    0.4398
Pt    0.3903    0.5927    0.4887
Pt    0.2408    0.6901    0.4429
Pt    0.3422    0.4912    0.4377
Pt    0.4517    0.7379    0.3745
Pt    0.4436    0.7378    0.4880
Pt    0.4422    0.5424    0.4864
Pt    0.2903    0.7372    0.4375
Pt    0.2917    0.4908    0.3875
Pt    0.3949    0.4917    0.3929
Pt    0.4853    0.5979    0.4874
Pt    0.2842    0.5843    0.5936
Pt    0.3876    0.5904    0.5921
Pt    0.3790    0.7010    0.5955
Pt    0.2905    0.5963    0.4955
Pt    0.4387    0.6478    0.5900
Pt    0.2886    0.5436    0.5405
Pt    0.2894    0.6468    0.5466
Pt    0.3870    0.5441    0.5392
Pt    0.3863    0.6430    0.5414
Pt    0.2877    0.4904    0.5847
Pt    0.4370    0.5446    0.5881
Pt    0.3367    0.5931    0.5408
Pt    0.3364    0.6943    0.5474
Pt    0.4379    0.5985    0.5401
Pt    0.4335    0.6959    0.5436
Pt    0.3386    0.5357    0.5940
Pt    0.3448    0.6405    0.5921
Pt    0.4885    0.6945    0.5838
Pt    0.4399    0.4940    0.5416
Pt    0.4877    0.5499    0.5396
Pt    0.4367    0.6436    0.4897
Pt    0.3385    0.6406    0.4894
Pt    0.3913    0.4972    0.4906
Pt    0.4848    0.4913    0.5893
Pt    0.2964    0.6914    0.4927
Pt    0.4864    0.5917    0.5919
Pt    0.3853    0.6928    0.4911
Pt    0.3362    0.5379    0.4897
Pt    0.3909    0.5878    0.6939
Pt    0.4869    0.6929    0.6995
Pt    0.2873    0.5037    0.6936
Pt    0.2905    0.5430    0.6405
Pt    0.3945    0.5408    0.6441
Pt    0.3901    0.6397    0.6381
Pt    0.4864    0.6466    0.6444
Pt    0.4352    0.6434    0.6968
Pt    0.3406    0.5921    0.6340
Pt    0.4414    0.5921    0.6434
Pt    0.4348    0.6990    0.6440
Pt    0.3411    0.5414    0.6871
Pt    0.4390    0.5395    0.6932
Pt    0.4877    0.4933    0.6901
Pt    0.3895    0.4891    0.6903
Pt    0.4853    0.5920    0.6952
Pt    0.4846    0.5379    0.6373
Pt    0.4410    0.4897    0.6417
Pt    0.2940    0.5398    0.8419
Pt    0.4391    0.5892    0.7458
Pt    0.3501    0.4958    0.8421
Pt    0.2447    0.5424    0.7847
Pt    0.2931    0.4963    0.7883
Pt    0.4462    0.4894    0.7452
Pt    0.3919    0.5405    0.7459
Pt    0.2448    0.5898    0.8388
Pt    0.3935    0.4916    0.7944
Pt    0.3399    0.4954    0.7394
Pt    0.4860    0.7344    0.8382
Pt    0.2450    0.4961    0.8338
Pt    0.4866    0.6400    0.7429
Pt    0.2927    0.5399    0.9336
Pt    0.2972    0.4893    0.8863
Pt    0.2539    0.5925    0.9262
Pt    0.2926    0.6405    0.9400
Pt    0.3432    0.6900    0.9408
Pt    0.4133    0.6744    0.9215
Pt    0.2964    0.5868    0.9828
Pt    0.4839    0.6885    0.8909
Pt    0.2482    0.5363    0.9831
Pt    0.4554    0.6779    0.9677
Pt    0.3875    0.7376    0.9459
Pt    0.2908    0.6973    0.9852
Pt    0.2431    0.6406    0.9864
Pt    0.4316    0.7354    0.8957
Pt    0.4886    0.7384    0.9373
Pt    0.3911    0.6880    0.9887
Pt    0.3397    0.6387    0.9882
Pt    0.3870    0.7898    0.9895
Pt    0.2819    0.7876    0.0908
Pt    0.3311    0.8886    0.0398
Pt    0.2858    0.8944    0.0894
Pt    0.3313    0.7869    0.0421
Pt    0.3818    0.7895    0.0893
Pt    0.3315    0.8420    0.0923
Pt    0.3870    0.8866    0.0873
Pt    0.3886    0.9380    0.0381
Pt    0.4386    0.9358    0.0800
Pt    0.4360    0.8326    0.0857
Pt    0.4392    0.8890    0.0322
Pt    0.3390    0.9432    0.0891
Pt    0.2820    0.8422    0.0457
Pt    0.2836    0.9430    0.0431
Pt    0.4395    0.7915    0.0351
Pt    0.3850    0.8391    0.0390
Pt    0.4876    0.8906    0.9897
Pt    0.3879    0.8873    0.9898
Pt    0.3299    0.8424    0.9938
Pt    0.3874    0.7436    0.0378
Pt    0.4331    0.9431    0.9940
Pt    0.2847    0.7425    0.0405
Pt    0.4885    0.7841    0.9917
Pt    0.3357    0.9396    0.9907
Pt    0.2767    0.8962    0.9938
Pt    0.2870    0.7820    0.1905
Pt    0.2942    0.8877    0.1815
Pt    0.3905    0.7852    0.1895
Pt    0.3909    0.8893    0.1880
Pt    0.4457    0.9347    0.1904
Pt    0.4471    0.8369    0.1822
Pt    0.3454    0.8877    0.2377
Pt    0.3386    0.8316    0.1895
Pt    0.2825    0.8392    0.1407
Pt    0.3336    0.7891    0.1385
Pt    0.2872    0.9468    0.1368
Pt    0.4395    0.8904    0.1352
Pt    0.4360    0.7883    0.1386
Pt    0.3429    0.9435    0.1892
Pt    0.3905    0.8396    0.1404
Pt    0.3445    0.8896    0.1391
Pt    0.3965    0.9370    0.1324
Pt    0.3963    0.8408    0.2291
Pt    0.3934    0.9834    0.1960
Pt    0.2932    0.8374    0.2381
Pt    0.4464    0.9833    0.1410
Pt    0.4427    0.7923    0.2360
Pt    0.2456    0.8910    0.2388
Pt    0.3981    0.9333    0.2388
Pt    0.2962    0.7940    0.2910
Pt    0.2969    0.8851    0.2900
Pt    0.3984    0.7872    0.2850
Pt    0.3953    0.8870    0.2908
Pt    0.4474    0.8863    0.2391
Pt    0.2997    0.8397    0.3406
Pt    0.2936    0.9390    0.3369
Pt    0.4459    0.9838    0.2506
Pt    0.3914    0.8371    0.3324
Pt    0.3989    0.9343    0.3380
Pt    0.4490    0.9344    0.2885
Pt    0.3464    0.7866    0.3361
Pt    0.3482    0.8919    0.3426
Pt    0.4453    0.7957    0.3380
Pt    0.2422    0.9415    0.2895
Pt    0.3476    0.8341    0.2819
Pt    0.3441    0.9377    0.2902
Pt    0.2435    0.8891    0.3342
Pt    0.4451    0.8395    0.2892
Pt    0.2943    0.7409    0.3398
Pt    0.3936    0.9828    0.2888
Pt    0.3438    0.9876    0.3341
Pt    0.2939    0.9869    0.2907
Pt    0.2936    0.9396    0.2435
Pt    0.2439    0.7865    0.2436
Pt    0.2440    0.7951    0.3434
Pt    0.3375    0.7854    0.2391
Pt    0.2978    0.7903    0.3855
Pt    0.4852    0.7897    0.3913
Pt    0.2926    0.8919    0.3869
Pt    0.4398    0.7900    0.4371
Pt    0.3978    0.7910    0.3809
Pt    0.3463    0.8378    0.3904
Pt    0.4023    0.8766    0.3865
Pt    0.3489    0.8859    0.4393
Pt    0.2464    0.8470    0.3929
Pt    0.3492    0.7950    0.4392
Pt    0.2988    0.8412    0.4440
Pt    0.2969    0.9445    0.4439
Pt    0.2518    0.8910    0.4422
Pt    0.4038    0.8414    0.4441
Pt    0.3413    0.9417    0.3876
Pt    0.2458    0.7961    0.4336
Pt    0.4894    0.7401    0.4372
Pt    0.3906    0.7427    0.4377
Pt    0.2473    0.9381    0.3917
Pt    0.3422    0.7411    0.4862
Pt    0.3460    0.7393    0.3865
Pt    0.2453    0.9836    0.4378
Pt    0.2424    0.7426    0.3914
Pt    0.4894    0.7921    0.4834
Pt    0.3791    0.7797    0.5962
Pt    0.4838    0.7963    0.5939
Pt    0.3012    0.8479    0.5296
Pt    0.2950    0.7882    0.4889
Pt    0.3079    0.8982    0.4921
Pt    0.3471    0.7919    0.5355
Pt    0.4337    0.7918    0.5531
Pt    0.2471    0.8908    0.5443
Pt    0.2496    0.9816    0.5435
Pt    0.3881    0.7430    0.5381
Pt    0.4862    0.7548    0.5411
Pt    0.2494    0.7395    0.5070
Pt    0.4402    0.7409    0.5937
Pt    0.4055    0.7915    0.4924
Pt    0.2459    0.9414    0.4942
Pt    0.2465    0.8398    0.4893
Pt    0.3591    0.8428    0.4920
Pt    0.4309    0.7908    0.6410
Pt    0.4854    0.7390    0.6405
Pt    0.4768    0.8771    0.6963
Pt    0.2942    0.9858    0.6872
Pt    0.4804    0.8450    0.6403
Pt    0.4813    0.7940    0.6880
Pt    0.2417    0.9442    0.6979
Pt    0.4820    0.9351    0.7363
Pt    0.3786    0.8846    0.8006
Pt    0.2946    0.9873    0.7855
Pt    0.4895    0.7911    0.7936
Pt    0.2898    0.9368    0.8382
Pt    0.3850    0.8379    0.8444
Pt    0.4871    0.9404    0.8385
Pt    0.3911    0.9394    0.8429
Pt    0.4374    0.9432    0.7917
Pt    0.4321    0.8348    0.7881
Pt    0.3408    0.8931    0.8471
Pt    0.3372    0.9399    0.7893
Pt    0.4346    0.8920    0.8365
Pt    0.4322    0.7879    0.8389
Pt    0.4854    0.8882    0.7871
Pt    0.4809    0.8407    0.8366
Pt    0.2449    0.9883    0.8351
Pt    0.4860    0.8335    0.7494
Pt    0.4336    0.8918    0.7489
Pt    0.3855    0.9470    0.7425
Pt    0.2858    0.8940    0.8876
Pt    0.3843    0.7911    0.8930
Pt    0.3898    0.8875    0.8923
Pt    0.4420    0.8400    0.9841
Pt    0.4892    0.8382    0.9397
Pt    0.2795    0.8525    0.9374
Pt    0.2833    0.9418    0.9436
Pt    0.4382    0.9438    0.8938
Pt    0.3826    0.8418    0.9398
Pt    0.3824    0.9409    0.9439
Pt    0.4393    0.8434    0.8883
Pt    0.4850    0.8933    0.8860
Pt    0.2785    0.8068    0.9883
Pt    0.3324    0.7977    0.9454
Pt    0.3328    0.8914    0.9355
Pt    0.4385    0.7874    0.9419
Pt    0.4404    0.8984    0.9384
Pt    0.3329    0.8404    0.8867
Pt    0.3371    0.9435    0.8845
Pt    0.4869    0.7891    0.8876
Pt    0.3321    0.7469    0.9865
Pt    0.3401    0.9880    0.9350
Pt    0.2471    0.7497    0.9879
Pt    0.6844    0.1327    0.0394
Pt    0.6407    0.1356    0.0891
Pt    0.6409    0.1853    0.0409
Pt    0.5929    0.0855    0.0845
Pt    0.6387    0.0877    0.0383
Pt    0.5828    0.1892    0.0838
Pt    0.5392    0.0430    0.0858
Pt    0.6445    0.0386    0.0853
Pt    0.5316    0.1884    0.0331
Pt    0.6964    0.0864    0.0851
Pt    0.5412    0.0883    0.0363
Pt    0.6908    0.1857    0.0879
Pt    0.5923    0.0386    0.0382
Pt    0.5815    0.1442    0.0362
Pt    0.5303    0.1410    0.0892
Pt    0.6921    0.0343    0.0374
Pt    0.7372    0.1916    0.0378
Pt    0.6489    0.9891    0.0422
Pt    0.7381    0.1378    0.0810
Pt    0.5856    0.2386    0.0304
Pt    0.5380    0.9898    0.0365
Pt    0.5913    0.0943    0.9891
Pt    0.6892    0.1959    0.9893
Pt    0.7377    0.1393    0.9895
Pt    0.6960    0.9890    0.9890
Pt    0.6389    0.2374    0.9890
Pt    0.5334    0.1373    0.1830
Pt    0.5883    0.0946    0.1851
Pt    0.5876    0.1880    0.1879
Pt    0.6397    0.2362    0.1895
Pt    0.6862    0.0861    0.1861
Pt    0.6906    0.1848    0.1865
Pt    0.5857    0.0408    0.1353
Pt    0.6414    0.0801    0.1346
Pt    0.5880    0.1349    0.1320
Pt    0.6377    0.1904    0.1385
Pt    0.6428    0.0368    0.1838
Pt    0.5350    0.0371    0.1898
Pt    0.6956    0.0304    0.1338
Pt    0.5405    0.1907    0.1424
Pt    0.6893    0.1355    0.1378
Pt    0.5376    0.0887    0.1342
Pt    0.6380    0.1391    0.1852
Pt    0.5916    0.0426    0.2328
Pt    0.5385    0.0847    0.2341
Pt    0.7396    0.1830    0.1382
Pt    0.4901    0.9889    0.1946
Pt    0.5407    0.9929    0.1380
Pt    0.6399    0.0877    0.2363
Pt    0.7396    0.1903    0.2344
Pt    0.6327    0.1842    0.2347
Pt    0.7332    0.0839    0.2379
Pt    0.7340    0.1331    0.1899
Pt    0.5392    0.2365    0.1919
Pt    0.5874    0.2375    0.1384
Pt    0.5936    0.9903    0.1848
Pt    0.4901    0.1377    0.2365
Pt    0.6872    0.1350    0.2380
Pt    0.6886    0.0324    0.2358
Pt    0.6915    0.2378    0.1388
Pt    0.7385    0.1429    0.2858
Pt    0.5863    0.0804    0.2887
Pt    0.5920    0.1825    0.2904
Pt    0.5399    0.9893    0.2409
Pt    0.6891    0.0809    0.2882
Pt    0.6765    0.1835    0.2897
Pt    0.5889    0.0335    0.3393
Pt    0.5855    0.1316    0.3348
Pt    0.4966    0.2340    0.3459
Pt    0.6834    0.0348    0.3382
Pt    0.6885    0.1333    0.3310
Pt    0.6380    0.2354    0.2896
Pt    0.5266    0.0978    0.3457
Pt    0.5390    0.1754    0.3388
Pt    0.7391    0.1943    0.3379
Pt    0.6373    0.0819    0.3347
Pt    0.6361    0.1793    0.3436
Pt    0.5306    0.0313    0.2962
Pt    0.5364    0.1309    0.2894
Pt    0.6381    0.1307    0.2873
Pt    0.6358    0.0351    0.2843
Pt    0.5881    0.9912    0.2887
Pt    0.5921    0.2327    0.3425
Pt    0.7370    0.0890    0.3377
Pt    0.5408    0.2277    0.2894
Pt    0.6903    0.2323    0.2425
Pt    0.6889    0.2314    0.3442
Pt    0.7375    0.0339    0.2856
Pt    0.5375    0.1843    0.2396
Pt    0.5838    0.1358    0.2407
Pt    0.4917    0.2386    0.2408
Pt    0.5863    0.0843    0.3817
Pt    0.5805    0.1817    0.3880
Pt    0.6875    0.2381    0.4382
Pt    0.6848    0.0927    0.3865
Pt    0.6942    0.1768    0.3865
Pt    0.7299    0.0367    0.3868
Pt    0.6360    0.0374    0.3904
Pt    0.6895    0.0365    0.4388
Pt    0.6850    0.1304    0.4406
Pt    0.6309    0.1334    0.3957
Pt    0.6447    0.1864    0.4332
Pt    0.5439    0.2335    0.3944
Pt    0.6383    0.2295    0.3898
Pt    0.7368    0.1833    0.4424
Pt    0.4925    0.2332    0.4426
Pt    0.5828    0.2260    0.4533
Pt    0.6837    0.9894    0.3939
Pt    0.6432    0.2343    0.4832
Pt    0.7377    0.0839    0.4356
Pt    0.7395    0.1334    0.3868
Pt    0.7357    0.2383    0.4873
Pt    0.7296    0.0412    0.5905
Pt    0.6891    0.9912    0.5906
Pt    0.7340    0.0390    0.4935
Pt    0.5345    0.2291    0.5924
Pt    0.6906    0.1818    0.4905
Pt    0.5900    0.2335    0.5440
Pt    0.5382    0.2304    0.5010
Pt    0.7380    0.0865    0.5408
Pt    0.5800    0.2367    0.6445
Pt    0.5353    0.0340    0.6822
Pt    0.6335    0.0855    0.7373
Pt    0.5459    0.0894    0.7344
Pt    0.5389    0.1878    0.6431
Pt    0.6254    0.0381    0.6859
Pt    0.5493    0.1420    0.6936
Pt    0.6379    0.9945    0.6370
Pt    0.6866    0.0010    0.6902
Pt    0.5832    0.0370    0.7340
Pt    0.7371    0.9970    0.6413
Pt    0.6401    0.9952    0.7382
Pt    0.6900    0.0475    0.7370
Pt    0.4938    0.1388    0.6390
Pt    0.4939    0.1454    0.7307
Pt    0.4909    0.1923    0.6848
Pt    0.5285    0.9892    0.7385
Pt    0.5790    0.9905    0.6877
Pt    0.4902    0.0819    0.6825
Pt    0.7339    0.0496    0.7878
Pt    0.5912    0.0885    0.7879
Pt    0.6320    0.0393    0.7910
Pt    0.6780    0.0917    0.7872
Pt    0.6908    0.9979    0.7921
Pt    0.5857    0.0343    0.8388
Pt    0.5950    0.1401    0.8376
Pt    0.5449    0.1379    0.7870
Pt    0.6870    0.0389    0.8421
Pt    0.5375    0.9913    0.8377
Pt    0.5382    0.1851    0.8375
Pt    0.6415    0.0899    0.8404
Pt    0.5404    0.0851    0.8334
Pt    0.5414    0.0392    0.7893
Pt    0.4955    0.1374    0.8361
Pt    0.4916    0.0432    0.8409
Pt    0.6375    0.9916    0.8327
Pt    0.4975    0.0427    0.7403
Pt    0.5528    0.1893    0.7467
Pt    0.4908    0.0976    0.7793
Pt    0.6403    0.0368    0.9879
Pt    0.5874    0.0837    0.8874
Pt    0.6007    0.1882    0.8806
Pt    0.5411    0.9933    0.9417
Pt    0.6928    0.0936    0.8853
Pt    0.5897    0.0427    0.9433
Pt    0.5914    0.1332    0.9435
Pt    0.6878    0.0418    0.9346
Pt    0.6960    0.1486    0.9356
Pt    0.4936    0.0881    0.8878
Pt    0.5385    0.0896    0.9409
Pt    0.5357    0.1891    0.9310
Pt    0.6387    0.0425    0.8913
Pt    0.6464    0.0945    0.9407
Pt    0.6380    0.1905    0.9390
Pt    0.5396    0.0377    0.8902
Pt    0.5471    0.1351    0.8847
Pt    0.6353    0.1325    0.8915
Pt    0.5321    0.1401    0.9832
Pt    0.7374    0.1004    0.9314
Pt    0.6925    0.9911    0.8893
Pt    0.4928    0.1876    0.8829
Pt    0.6928    0.0849    0.9873
Pt    0.5933    0.9892    0.8872
Pt    0.5857    0.1906    0.9778
Pt    0.5452    0.2384    0.8863
Pt    0.6392    0.9900    0.9397
Pt    0.5355    0.0396    0.9886
Pt    0.6423    0.1393    0.9888
Pt    0.5886    0.2921    0.0742
Pt    0.7309    0.4869    0.0428
Pt    0.6909    0.2901    0.0891
Pt    0.6913    0.3854    0.0868
Pt    0.5363    0.2427    0.0948
Pt    0.6914    0.3385    0.0325
Pt    0.5323    0.2854    0.0364
Pt    0.6359    0.2888    0.0303
Pt    0.5411    0.3352    0.0788
Pt    0.6368    0.3352    0.0822
Pt    0.6322    0.2403    0.0820
Pt    0.7376    0.2871    0.0384
Pt    0.7368    0.3944    0.0371
Pt    0.6882    0.2394    0.0419
Pt    0.7372    0.4347    0.0874
Pt    0.5864    0.2916    0.1898
Pt    0.5951    0.3874    0.1859
Pt    0.6895    0.2851    0.1933
Pt    0.6895    0.3864    0.1895
Pt    0.7384    0.3846    0.1398
Pt    0.5826    0.3392    0.1355
Pt    0.4948    0.4394    0.2347
Pt    0.6388    0.4391    0.1844
Pt    0.6923    0.3395    0.1349
Pt    0.6352    0.3843    0.1323
Pt    0.6888    0.4381    0.1409
Pt    0.4909    0.2410    0.1383
Pt    0.5390    0.2902    0.1376
Pt    0.5359    0.3398    0.1955
Pt    0.5363    0.3838    0.1362
Pt    0.6390    0.3381    0.1836
Pt    0.5380    0.4353    0.1810
Pt    0.6386    0.2878    0.1334
Pt    0.7392    0.2889    0.1405
Pt    0.6948    0.4857    0.1869
Pt    0.4909    0.2886    0.1908
Pt    0.7374    0.3939    0.2357
Pt    0.7395    0.4344    0.1849
Pt    0.6422    0.4847    0.2327
Pt    0.5880    0.4400    0.2294
Pt    0.7356    0.3373    0.1905
Pt    0.5388    0.3869    0.2374
Pt    0.5846    0.2389    0.2387
Pt    0.6896    0.4366    0.2386
Pt    0.6384    0.2882    0.2387
Pt    0.5927    0.2871    0.2889
Pt    0.5886    0.3862    0.2887
Pt    0.4909    0.4391    0.3365
Pt    0.6842    0.2877    0.2903
Pt    0.6902    0.3908    0.2895
Pt    0.6379    0.4440    0.2898
Pt    0.5893    0.3346    0.3394
Pt    0.5859    0.4352    0.3388
Pt    0.6932    0.3344    0.3346
Pt    0.6859    0.4408    0.3429
Pt    0.5435    0.2860    0.3461
Pt    0.5384    0.3852    0.3438
Pt    0.6409    0.3391    0.2907
Pt    0.6376    0.2865    0.3437
Pt    0.6412    0.3884    0.3407
Pt    0.5437    0.4388    0.2855
Pt    0.5383    0.3385    0.2959
Pt    0.6389    0.3946    0.2401
Pt    0.7339    0.4443    0.2896
Pt    0.4954    0.2764    0.2961
Pt    0.5895    0.3379    0.2421
Pt    0.5369    0.2925    0.2457
Pt    0.6884    0.3371    0.2407
Pt    0.7375    0.2834    0.3417
Pt    0.7397    0.2861    0.2415
Pt    0.7394    0.3420    0.2825
Pt    0.7333    0.3841    0.3431
Pt    0.4907    0.3335    0.3397
Pt    0.7382    0.4811    0.3422
Pt    0.7343    0.2404    0.2867
Pt    0.4926    0.3370    0.2410
Pt    0.5917    0.2779    0.3963
Pt    0.6409    0.3392    0.3881
Pt    0.5881    0.3871    0.3900
Pt    0.5384    0.4398    0.3895
Pt    0.6347    0.4401    0.4879
Pt    0.5382    0.3347    0.3955
Pt    0.6916    0.2845    0.3901
Pt    0.6383    0.3903    0.4437
Pt    0.6836    0.3875    0.3933
Pt    0.6401    0.2902    0.4363
Pt    0.5397    0.3932    0.4489
Pt    0.6376    0.4418    0.3900
Pt    0.5854    0.3377    0.4433
Pt    0.5900    0.4393    0.4386
Pt    0.6853    0.3348    0.4395
Pt    0.6892    0.4367    0.4444
Pt    0.5434    0.2825    0.4519
Pt    0.7340    0.4310    0.3909
Pt    0.6979    0.4848    0.3944
Pt    0.4930    0.3820    0.3964
Pt    0.5871    0.4856    0.3889
Pt    0.7348    0.3354    0.3931
Pt    0.7370    0.3823    0.4444
Pt    0.4937    0.3327    0.4460
Pt    0.5875    0.2794    0.5935
Pt    0.5863    0.3900    0.5879
Pt    0.4913    0.3899    0.4909
Pt    0.6902    0.3830    0.5894
Pt    0.6930    0.4831    0.5888
Pt    0.5913    0.3279    0.5487
Pt    0.5929    0.4406    0.5404
Pt    0.6968    0.3281    0.5502
Pt    0.6827    0.4341    0.5377
Pt    0.5379    0.2806    0.5460
Pt    0.5347    0.3849    0.5430
Pt    0.6401    0.3228    0.5964
Pt    0.6461    0.2800    0.5388
Pt    0.6439    0.3771    0.5484
Pt    0.6447    0.4368    0.5900
Pt    0.5374    0.3331    0.5889
Pt    0.5372    0.4393    0.6012
Pt    0.4905    0.3346    0.5374
Pt    0.5433    0.3345    0.4980
Pt    0.6975    0.3837    0.4946
Pt    0.5380    0.4400    0.4963
Pt    0.7393    0.4331    0.5845
Pt    0.6364    0.3383    0.4904
Pt    0.7347    0.4391    0.4968
Pt    0.5964    0.2817    0.4923
Pt    0.6904    0.2858    0.4891
Pt    0.4919    0.2853    0.5922
Pt    0.5893    0.3856    0.5031
Pt    0.5418    0.4848    0.5451
Pt    0.5910    0.2886    0.6874
Pt    0.5934    0.3913    0.6918
Pt    0.5327    0.2427    0.6906
Pt    0.6892    0.3846    0.6985
Pt    0.6380    0.3350    0.6894
Pt    0.5832    0.3332    0.6405
Pt    0.5957    0.4344    0.6405
Pt    0.6912    0.4321    0.6405
Pt    0.5339    0.2887    0.6403
Pt    0.5431    0.3897    0.6460
Pt    0.6374    0.4367    0.6961
Pt    0.6401    0.3776    0.6372
Pt    0.5382    0.4401    0.6902
Pt    0.5398    0.3474    0.6931
Pt    0.6428    0.4843    0.6385
Pt    0.4904    0.3902    0.6862
Pt    0.6954    0.4794    0.6884
Pt    0.6346    0.3891    0.7377
Pt    0.5882    0.4869    0.6891
Pt    0.5419    0.3962    0.7385
Pt    0.7363    0.4885    0.8343
Pt    0.5385    0.3441    0.7793
Pt    0.5944    0.3355    0.7470
Pt    0.5448    0.2883    0.7391
Pt    0.6373    0.4327    0.7867
Pt    0.6839    0.4434    0.8367
Pt    0.6899    0.4287    0.7431
Pt    0.4904    0.3928    0.7948
Pt    0.4910    0.2414    0.7428
Pt    0.6828    0.4857    0.7917
Pt    0.5895    0.4447    0.7445
Pt    0.4921    0.2422    0.8411
Pt    0.6359    0.4877    0.8383
Pt    0.5810    0.4866    0.7924
Pt    0.5376    0.2444    0.7934
Pt    0.6867    0.4502    0.9309
Pt    0.7368    0.3885    0.9324
Pt    0.6899    0.2840    0.9847
Pt    0.5358    0.2400    0.9838
Pt    0.7330    0.3364    0.9836
Pt    0.4950    0.2439    0.9297
Pt    0.7380    0.4402    0.9838
Pt    0.6879    0.6865    0.9944
Pt    0.5497    0.6921    0.0530
Pt    0.4954    0.7338    0.0365
Pt    0.7286    0.5923    0.0547
Pt    0.6955    0.6490    0.0446
Pt    0.5034    0.6724    0.0087
Pt    0.6343    0.6907    0.0355
Pt    0.7368    0.5402    0.0915
Pt    0.6418    0.6335    0.9936
Pt    0.5774    0.6852    0.9937
Pt    0.6916    0.5904    0.9933
Pt    0.7395    0.7369    0.9933
Pt    0.7379    0.5419    0.9956
Pt    0.4977    0.5765    0.1843
Pt    0.4952    0.7350    0.1307
Pt    0.5392    0.6801    0.1323
Pt    0.4952    0.6316    0.2320
Pt    0.5482    0.5926    0.2344
Pt    0.4979    0.6792    0.1789
Pt    0.4946    0.4915    0.1867
Pt    0.5446    0.4918    0.2327
Pt    0.5892    0.5373    0.2263
Pt    0.5916    0.5918    0.2801
Pt    0.5898    0.5443    0.3330
Pt    0.5844    0.6385    0.3351
Pt    0.6997    0.5429    0.3382
Pt    0.5434    0.5905    0.3371
Pt    0.5372    0.6870    0.3356
Pt    0.6449    0.5914    0.3359
Pt    0.5443    0.5384    0.2878
Pt    0.5464    0.6381    0.2829
Pt    0.6421    0.5495    0.2869
Pt    0.4926    0.6389    0.3280
Pt    0.4966    0.5369    0.3389
Pt    0.4971    0.5398    0.2405
Pt    0.6825    0.4903    0.2910
Pt    0.7300    0.4890    0.2396
Pt    0.4964    0.5890    0.2866
Pt    0.4978    0.6874    0.2825
Pt    0.6321    0.4933    0.3402
Pt    0.5424    0.4902    0.3340
Pt    0.5935    0.4892    0.2802
Pt    0.5978    0.5877    0.3898
Pt    0.6460    0.6384    0.3841
Pt    0.5975    0.6918    0.3749
Pt    0.6899    0.6939    0.4827
Pt    0.7028    0.5882    0.3865
Pt    0.5378    0.7354    0.3868
Pt    0.6456    0.5432    0.3872
Pt    0.5953    0.5458    0.4392
Pt    0.6022    0.6416    0.4376
Pt    0.6967    0.5419    0.4328
Pt    0.6975    0.6421    0.4299
Pt    0.5446    0.5904    0.4349
Pt    0.5390    0.6939    0.4369
Pt    0.6478    0.5898    0.4424
Pt    0.6464    0.6897    0.4313
Pt    0.5459    0.5389    0.3917
Pt    0.5954    0.5926    0.4887
Pt    0.5468    0.6387    0.3882
Pt    0.4907    0.6845    0.3863
Pt    0.4906    0.5410    0.4451
Pt    0.4945    0.5865    0.3891
Pt    0.6357    0.7342    0.4859
Pt    0.5436    0.6363    0.4789
Pt    0.6429    0.4911    0.4385
Pt    0.5864    0.4907    0.4883
Pt    0.5399    0.4901    0.4450
Pt    0.4949    0.4941    0.3939
Pt    0.5839    0.6941    0.4856
Pt    0.5893    0.5918    0.5900
Pt    0.5924    0.6898    0.5863
Pt    0.6938    0.5935    0.5898
Pt    0.6956    0.6968    0.5887
Pt    0.5890    0.5394    0.5368
Pt    0.5877    0.6428    0.5362
Pt    0.6904    0.5378    0.5417
Pt    0.6961    0.6399    0.5263
Pt    0.5379    0.5897    0.5455
Pt    0.5408    0.6886    0.5411
Pt    0.6403    0.5980    0.5436
Pt    0.6461    0.6902    0.5338
Pt    0.5384    0.5358    0.5858
Pt    0.5377    0.6398    0.5894
Pt    0.6469    0.5362    0.5879
Pt    0.6478    0.6482    0.5888
Pt    0.4911    0.4952    0.4967
Pt    0.4942    0.6380    0.5371
Pt    0.7378    0.6855    0.5338
Pt    0.6986    0.5841    0.4917
Pt    0.6423    0.5381    0.4937
Pt    0.6852    0.4902    0.4933
Pt    0.6369    0.6422    0.4909
Pt    0.5890    0.4906    0.5930
Pt    0.4905    0.6927    0.4951
Pt    0.5378    0.7373    0.5937
Pt    0.6382    0.4903    0.5423
Pt    0.5402    0.5498    0.4889
Pt    0.5936    0.5965    0.6918
Pt    0.5865    0.6873    0.6900
Pt    0.6902    0.5915    0.6865
Pt    0.6884    0.6956    0.6867
Pt    0.5877    0.5359    0.6448
Pt    0.5940    0.6403    0.6391
Pt    0.6957    0.5329    0.6369
Pt    0.6941    0.6444    0.6376
Pt    0.5324    0.5892    0.6431
Pt    0.5389    0.6887    0.6411
Pt    0.6428    0.5898    0.6356
Pt    0.6352    0.6928    0.6413
Pt    0.5461    0.5464    0.6942
Pt    0.5395    0.6443    0.6877
Pt    0.6409    0.5397    0.6830
Pt    0.6410    0.6435    0.6938
Pt    0.6919    0.6430    0.7376
Pt    0.7371    0.5809    0.7369
Pt    0.5372    0.7378    0.6911
Pt    0.5908    0.7386    0.7379
Pt    0.6886    0.5374    0.7326
Pt    0.5380    0.4892    0.6472
Pt    0.7387    0.6930    0.6408
Pt    0.6437    0.5923    0.7361
Pt    0.5863    0.5881    0.7821
Pt    0.5906    0.6907    0.7937
Pt    0.6867    0.5901    0.7903
Pt    0.6896    0.6942    0.7956
Pt    0.7380    0.6959    0.7395
Pt    0.5893    0.5415    0.8396
Pt    0.5882    0.6427    0.7429
Pt    0.5895    0.6422    0.8431
Pt    0.6459    0.6413    0.7893
Pt    0.6904    0.5398    0.8346
Pt    0.5449    0.5419    0.7847
Pt    0.6954    0.6382    0.8374
Pt    0.5368    0.6462    0.7922
Pt    0.6394    0.6877    0.8443
Pt    0.5382    0.6846    0.8442
Pt    0.6403    0.5415    0.7907
Pt    0.6381    0.5906    0.8380
Pt    0.6432    0.4909    0.7402
Pt    0.5381    0.6948    0.7436
Pt    0.7384    0.6399    0.7791
Pt    0.4947    0.5467    0.7413
Pt    0.6891    0.7387    0.8411
Pt    0.6379    0.7358    0.7877
Pt    0.5389    0.4938    0.7404
Pt    0.5984    0.5396    0.7409
Pt    0.5374    0.5972    0.7390
Pt    0.6421    0.6893    0.7390
Pt    0.5976    0.5906    0.8869
Pt    0.5897    0.6961    0.8851
Pt    0.6908    0.5887    0.8844
Pt    0.6902    0.6867    0.8865
Pt    0.5782    0.6428    0.9373
Pt    0.6905    0.5440    0.9396
Pt    0.6917    0.6409    0.9439
Pt    0.5383    0.6919    0.9326
Pt    0.6460    0.5926    0.9402
Pt    0.6338    0.6865    0.9453
Pt    0.6357    0.5304    0.8933
Pt    0.6456    0.6346    0.8897
Pt    0.5375    0.7348    0.9837
Pt    0.7376    0.6870    0.9397
Pt    0.6884    0.4949    0.9885
Pt    0.6908    0.4989    0.8840
Pt    0.7392    0.4914    0.9365
Pt    0.4916    0.8459    0.0397
Pt    0.6003    0.7879    0.0934
Pt    0.5414    0.8317    0.0889
Pt    0.5966    0.8906    0.0926
Pt    0.6474    0.8411    0.0881
Pt    0.6427    0.8424    0.9910
Pt    0.6978    0.8881    0.0909
Pt    0.6376    0.7393    0.9913
Pt    0.5921    0.8355    0.0439
Pt    0.5908    0.9387    0.0404
Pt    0.6971    0.8423    0.0394
Pt    0.6978    0.9360    0.0337
Pt    0.5444    0.7879    0.0326
Pt    0.5437    0.8894    0.0404
Pt    0.6455    0.7900    0.0378
Pt    0.6409    0.8868    0.0439
Pt    0.5497    0.7430    0.0929
Pt    0.6526    0.9394    0.0937
Pt    0.5433    0.9407    0.0933
Pt    0.6986    0.9826    0.0861
Pt    0.4954    0.9385    0.0389
Pt    0.5861    0.9873    0.9906
Pt    0.4904    0.7854    0.0837
Pt    0.5923    0.7886    0.9892
Pt    0.5879    0.9874    0.0833
Pt    0.5921    0.8844    0.9913
Pt    0.5937    0.7450    0.0420
Pt    0.4939    0.8937    0.0876
Pt    0.4924    0.9879    0.0891
Pt    0.6928    0.8931    0.9890
Pt    0.5871    0.8949    0.1958
Pt    0.5939    0.8397    0.1413
Pt    0.5921    0.9400    0.1405
Pt    0.6406    0.9416    0.1886
Pt    0.7008    0.9294    0.1467
Pt    0.5599    0.7904    0.1488
Pt    0.5486    0.8889    0.1343
Pt    0.4941    0.8818    0.1958
Pt    0.6453    0.8927    0.1439
Pt    0.5454    0.8414    0.1891
Pt    0.5352    0.9441    0.1951
Pt    0.4950    0.7867    0.1764
Pt    0.4919    0.8416    0.1380
Pt    0.6480    0.9840    0.1362
Pt    0.6898    0.9885    0.1885
Pt    0.4931    0.9333    0.1419
Pt    0.4946    0.7392    0.2285
Pt    0.7341    0.9789    0.2366
Pt    0.6814    0.9408    0.3480
Pt    0.7360    0.9300    0.2845
Pt    0.6884    0.9826    0.2917
Pt    0.7339    0.9840    0.3383
Pt    0.6397    0.9874    0.3401
Pt    0.5081    0.7524    0.3327
Pt    0.4955    0.9354    0.2443
Pt    0.5413    0.8864    0.2443
Pt    0.7298    0.8924    0.3386
Pt    0.4954    0.8289    0.2421
Pt    0.5878    0.9396    0.2533
Pt    0.6399    0.9849    0.2402
Pt    0.7253    0.8805    0.4233
Pt    0.6511    0.7596    0.4269
Pt    0.6803    0.9287    0.4301
Pt    0.7350    0.9820    0.4338
Pt    0.5421    0.7916    0.4381
Pt    0.6803    0.8220    0.4310
Pt    0.7378    0.9361    0.3903
Pt    0.6877    0.7750    0.4791
Pt    0.6364    0.8327    0.4816
Pt    0.5886    0.7917    0.4872
Pt    0.6833    0.8822    0.4795
Pt    0.7318    0.9344    0.4844
Pt    0.6921    0.9862    0.4869
Pt    0.5894    0.7419    0.4367
Pt    0.5825    0.7951    0.5858
Pt    0.5886    0.8940    0.5936
Pt    0.6938    0.7881    0.5815
Pt    0.6876    0.8844    0.5825
Pt    0.6419    0.9374    0.5814
Pt    0.5834    0.8452    0.5383
Pt    0.5845    0.7405    0.5388
Pt    0.6876    0.8322    0.5225
Pt    0.6872    0.9335    0.5332
Pt    0.5383    0.7956    0.5411
Pt    0.6354    0.7920    0.5370
Pt    0.6370    0.8837    0.5325
Pt    0.6385    0.8380    0.5856
Pt    0.5334    0.8510    0.5951
Pt    0.6364    0.7401    0.5825
Pt    0.7345    0.8345    0.5839
Pt    0.6913    0.7459    0.5370
Pt    0.7358    0.8908    0.5356
Pt    0.7356    0.9329    0.5895
Pt    0.7384    0.9835    0.5436
Pt    0.5388    0.7423    0.4963
Pt    0.5898    0.7893    0.6897
Pt    0.5888    0.8976    0.6840
Pt    0.6862    0.7977    0.6882
Pt    0.6930    0.8929    0.6903
Pt    0.7386    0.7422    0.6884
Pt    0.5883    0.8389    0.6398
Pt    0.5943    0.9439    0.6301
Pt    0.5834    0.7470    0.6391
Pt    0.6874    0.8408    0.6376
Pt    0.6894    0.9449    0.6410
Pt    0.5314    0.7967    0.6375
Pt    0.5421    0.8954    0.6419
Pt    0.6347    0.7943    0.6320
Pt    0.6374    0.8945    0.6410
Pt    0.6365    0.7427    0.6831
Pt    0.5339    0.8379    0.6874
Pt    0.5340    0.9346    0.6938
Pt    0.6874    0.8460    0.7362
Pt    0.6345    0.8421    0.6879
Pt    0.6358    0.9488    0.6849
Pt    0.7370    0.7885    0.6403
Pt    0.6866    0.7433    0.7359
Pt    0.7360    0.8805    0.6352
Pt    0.6332    0.8936    0.7351
Pt    0.5882    0.9440    0.7379
Pt    0.6917    0.9477    0.7312
Pt    0.5844    0.8441    0.7338
Pt    0.7392    0.8406    0.6893
Pt    0.6862    0.7415    0.6415
Pt    0.4907    0.7498    0.7379
Pt    0.5938    0.7916    0.7902
Pt    0.5864    0.8894    0.7836
Pt    0.6901    0.7939    0.7912
Pt    0.6930    0.8982    0.7873
Pt    0.6452    0.9449    0.7833
Pt    0.6432    0.8404    0.7808
Pt    0.6340    0.8970    0.8308
Pt    0.5916    0.8418    0.8386
Pt    0.6404    0.7908    0.8399
Pt    0.5883    0.9442    0.8336
Pt    0.5362    0.9433    0.7862
Pt    0.5387    0.8373    0.7872
Pt    0.5357    0.8862    0.8402
Pt    0.6827    0.8491    0.8383
Pt    0.5409    0.7945    0.8431
Pt    0.6883    0.9463    0.8398
Pt    0.5422    0.7410    0.7944
Pt    0.7352    0.8424    0.7943
Pt    0.5883    0.7439    0.8417
Pt    0.7374    0.7427    0.7898
Pt    0.6347    0.7907    0.7393
Pt    0.7367    0.7917    0.8381
Pt    0.7394    0.9466    0.7789
Pt    0.5413    0.7904    0.7429
Pt    0.7393    0.7932    0.7402
Pt    0.5328    0.8909    0.7403
Pt    0.5893    0.9880    0.7841
Pt    0.7394    0.8871    0.7407
Pt    0.5919    0.7967    0.8941
Pt    0.5930    0.8925    0.8815
Pt    0.6914    0.7967    0.8875
Pt    0.6944    0.8935    0.8906
Pt    0.6438    0.9430    0.8903
Pt    0.5908    0.8457    0.9377
Pt    0.5886    0.9395    0.9394
Pt    0.6439    0.8446    0.8895
Pt    0.6944    0.8425    0.9378
Pt    0.6951    0.9425    0.9418
Pt    0.5422    0.7906    0.9429
Pt    0.5298    0.8880    0.9388
Pt    0.6425    0.7981    0.9391
Pt    0.6444    0.8924    0.9365
Pt    0.5373    0.9404    0.8935
Pt    0.5337    0.8412    0.8881
Pt    0.6391    0.9424    0.9842
Pt    0.5361    0.8404    0.9873
Pt    0.5359    0.7414    0.8877
Pt    0.5439    0.9355    0.9857
Pt    0.7392    0.7429    0.8866
Pt    0.6411    0.7440    0.8949
Pt    0.4940    0.9473    0.9423
Pt    0.5904    0.7430    0.9376
Pt    0.6851    0.7399    0.9407
Pt    0.6920    0.7912    0.9844
Pt    0.8460    0.1375    0.0908
Pt    0.8405    0.0391    0.0831
Pt    0.7894    0.0877    0.0852
Pt    0.9475    0.1323    0.0899
Pt    0.7905    0.1868    0.0874
Pt    0.8935    0.0881    0.0785
Pt    0.9473    0.1780    0.0431
Pt    0.8914    0.1843    0.0858
Pt    0.7914    0.0320    0.0242
Pt    0.7948    0.1370    0.0356
Pt    0.8442    0.1867    0.0383
Pt    0.8944    0.1383    0.0365
Pt    0.8433    0.2362    0.0887
Pt    0.7447    0.9899    0.0362
Pt    0.8402    0.0832    0.0354
Pt    0.7463    0.0367    0.0880
Pt    0.9449    0.2362    0.0864
Pt    0.7884    0.2332    0.0337
Pt    0.7435    0.0858    0.0314
Pt    0.7930    0.1821    0.9910
Pt    0.9882    0.1919    0.9897
Pt    0.8421    0.0358    0.1857
Pt    0.7917    0.0861    0.1843
Pt    0.7838    0.1841    0.1837
Pt    0.8414    0.1405    0.1889
Pt    0.8878    0.0885    0.1831
Pt    0.8962    0.1832    0.1890
Pt    0.7940    0.0350    0.1389
Pt    0.8948    0.2356    0.1378
Pt    0.7960    0.1337    0.1387
Pt    0.7899    0.0389    0.2380
Pt    0.8460    0.1839    0.1412
Pt    0.8440    0.0833    0.1331
Pt    0.8968    0.0413    0.1319
Pt    0.9484    0.0828    0.1374
Pt    0.8986    0.1328    0.1341
Pt    0.9476    0.1338    0.1867
Pt    0.9420    0.0343    0.1850
Pt    0.8413    0.1928    0.2334
Pt    0.9408    0.1820    0.1355
Pt    0.7452    0.0844    0.1340
Pt    0.9518    0.1892    0.2349
Pt    0.8965    0.1329    0.2361
Pt    0.7931    0.2382    0.1351
Pt    0.9423    0.2362    0.1887
Pt    0.7403    0.0367    0.1878
Pt    0.7899    0.1392    0.2324
Pt    0.8408    0.2368    0.1883
Pt    0.9416    0.0795    0.2372
Pt    0.8520    0.9906    0.1340
Pt    0.8868    0.0364    0.2313
Pt    0.8385    0.0363    0.2874
Pt    0.7880    0.0801    0.2855
Pt    0.7892    0.1868    0.2859
Pt    0.8410    0.1329    0.2897
Pt    0.8908    0.0880    0.2883
Pt    0.8931    0.1867    0.2794
Pt    0.7845    0.0351    0.3406
Pt    0.7896    0.1351    0.3351
Pt    0.9473    0.1912    0.3301
Pt    0.8888    0.0370    0.3378
Pt    0.8975    0.1379    0.3298
Pt    0.9380    0.0832    0.3398
Pt    0.8427    0.1860    0.3336
Pt    0.9482    0.1355    0.2810
Pt    0.9395    0.0343    0.2848
Pt    0.8369    0.0892    0.3395
Pt    0.8353    0.9909    0.3370
Pt    0.8907    0.2367    0.3349
Pt    0.7885    0.2386    0.3331
Pt    0.8413    0.2341    0.2870
Pt    0.9865    0.1371    0.3368
Pt    0.9806    0.0376    0.3406
Pt    0.8429    0.9896    0.2415
Pt    0.8400    0.0847    0.2391
Pt    0.9423    0.1361    0.3862
Pt    0.9280    0.1892    0.4302
Pt    0.7862    0.0832    0.3853
Pt    0.9334    0.0874    0.4362
Pt    0.7870    0.1869    0.3818
Pt    0.8331    0.0324    0.3906
Pt    0.8319    0.1383    0.3855
Pt    0.8432    0.1894    0.4374
Pt    0.8864    0.0845    0.3793
Pt    0.8377    0.0866    0.4423
Pt    0.8928    0.1772    0.3765
Pt    0.9895    0.9889    0.3863
Pt    0.7824    0.0346    0.4356
Pt    0.7897    0.1394    0.4401
Pt    0.9324    0.0330    0.3925
Pt    0.8821    0.0344    0.4398
Pt    0.8859    0.1326    0.4329
Pt    0.8405    0.2358    0.3835
Pt    0.7446    0.2306    0.3920
Pt    0.9355    0.1306    0.4843
Pt    0.9377    0.0371    0.4875
Pt    0.7965    0.2380    0.4384
Pt    0.7829    0.0834    0.4883
Pt    0.7426    0.1361    0.4859
Pt    0.9865    0.1347    0.4459
Pt    0.9850    0.1889    0.4837
Pt    0.8463    0.1429    0.4836
Pt    0.9855    0.0342    0.4400
Pt    0.8344    0.0405    0.4861
Pt    0.9856    0.1904    0.3820
Pt    0.9877    0.0854    0.4883
Pt    0.8394    0.2382    0.4882
Pt    0.8927    0.1872    0.4850
Pt    0.9894    0.0802    0.3906
Pt    0.8377    0.0414    0.5855
Pt    0.7824    0.0950    0.5870
Pt    0.7874    0.1888    0.4925
Pt    0.8943    0.0939    0.5882
Pt    0.8894    0.1872    0.5874
Pt    0.7889    0.0408    0.5430
Pt    0.7904    0.1393    0.5364
Pt    0.8896    0.0426    0.5413
Pt    0.8919    0.1415    0.5359
Pt    0.9417    0.0430    0.5849
Pt    0.8350    0.9903    0.5374
Pt    0.9418    0.1412    0.5864
Pt    0.8395    0.1425    0.5804
Pt    0.8391    0.0863    0.5342
Pt    0.8403    0.1925    0.5337
Pt    0.9407    0.1908    0.5385
Pt    0.9393    0.0915    0.5388
Pt    0.9850    0.9900    0.5901
Pt    0.8897    0.0840    0.4889
Pt    0.7882    0.0070    0.6827
Pt    0.7444    0.0049    0.7344
Pt    0.8971    0.0886    0.6893
Pt    0.7865    0.0469    0.6302
Pt    0.8929    0.0379    0.6344
Pt    0.8906    0.1373    0.6374
Pt    0.9453    0.1446    0.6869
Pt    0.9407    0.0391    0.6884
Pt    0.8410    0.0875    0.6386
Pt    0.9818    0.2357    0.6410
Pt    0.9406    0.0883    0.6419
Pt    0.9381    0.1903    0.6326
Pt    0.8452    0.0404    0.6888
Pt    0.8349    0.9948    0.7342
Pt    0.9842    0.1950    0.6880
Pt    0.8392    0.9956    0.6341
Pt    0.9895    0.1377    0.6373
Pt    0.9875    0.0413    0.6359
Pt    0.9880    0.9894    0.6894
Pt    0.9442    0.9901    0.7477
Pt    0.7882    0.0002    0.7848
Pt    0.7932    0.0411    0.8356
Pt    0.9882    0.1434    0.7393
Pt    0.8899    0.9929    0.7863
Pt    0.7468    0.9921    0.8386
Pt    0.9417    0.0988    0.7397
Pt    0.7413    0.0891    0.8413
Pt    0.8922    0.0435    0.7393
Pt    0.9872    0.1916    0.8895
Pt    0.7945    0.0845    0.8969
Pt    0.8007    0.0330    0.9427
Pt    0.7883    0.1397    0.9382
Pt    0.8498    0.1288    0.9809
Pt    0.8885    0.2380    0.9415
Pt    0.9435    0.1915    0.9407
Pt    0.8432    0.1845    0.9425
Pt    0.7946    0.0861    0.9825
Pt    0.7443    0.2384    0.9847
Pt    0.7455    0.0409    0.8898
Pt    0.9277    0.2361    0.8885
Pt    0.7466    0.0398    0.9789
Pt    0.7997    0.9946    0.8853
Pt    0.8961    0.1852    0.9882
Pt    0.8406    0.3382    0.0912
Pt    0.7896    0.2860    0.0836
Pt    0.8382    0.4445    0.0925
Pt    0.7903    0.3879    0.0926
Pt    0.9417    0.4371    0.0881
Pt    0.9361    0.2886    0.0369
Pt    0.9351    0.3434    0.0889
Pt    0.8863    0.2893    0.0915
Pt    0.9475    0.3913    0.0366
Pt    0.8881    0.3902    0.0890
Pt    0.8374    0.2936    0.0382
Pt    0.8386    0.3921    0.0457
Pt    0.7844    0.3412    0.0306
Pt    0.7899    0.4408    0.0411
Pt    0.8891    0.3405    0.0393
Pt    0.8840    0.4442    0.0419
Pt    0.7405    0.3377    0.0873
Pt    0.8895    0.3918    0.9944
Pt    0.9409    0.4860    0.0356
Pt    0.7826    0.4889    0.9906
Pt    0.8380    0.3505    0.9942
Pt    0.9397    0.2399    0.9905
Pt    0.9882    0.2892    0.0913
Pt    0.7419    0.2393    0.0888
Pt    0.9835    0.3377    0.0408
Pt    0.7838    0.4841    0.0912
Pt    0.8855    0.2409    0.0338
Pt    0.8350    0.4398    0.9913
Pt    0.7921    0.2962    0.1901
Pt    0.7922    0.3906    0.1849
Pt    0.8415    0.3340    0.1836
Pt    0.8918    0.2905    0.1894
Pt    0.8927    0.3926    0.1907
Pt    0.9435    0.3880    0.1368
Pt    0.7880    0.3388    0.1357
Pt    0.9855    0.2431    0.1405
Pt    0.7950    0.4451    0.1459
Pt    0.9401    0.2895    0.1377
Pt    0.8919    0.3388    0.1382
Pt    0.8410    0.3847    0.1375
Pt    0.8946    0.4399    0.1383
Pt    0.8374    0.2831    0.1400
Pt    0.9415    0.4389    0.1885
Pt    0.9477    0.3384    0.1888
Pt    0.8428    0.4413    0.1959
Pt    0.9428    0.4855    0.1419
Pt    0.7916    0.2411    0.2264
Pt    0.8373    0.3898    0.2384
Pt    0.9428    0.2942    0.2378
Pt    0.7424    0.2403    0.1838
Pt    0.8881    0.3442    0.2373
Pt    0.8456    0.4862    0.1385
Pt    0.8929    0.2399    0.2383
Pt    0.8868    0.4396    0.2388
Pt    0.7876    0.2828    0.2896
Pt    0.7857    0.3863    0.2868
Pt    0.9470    0.3415    0.2959
Pt    0.8906    0.2952    0.2844
Pt    0.8982    0.3850    0.2927
Pt    0.8350    0.4393    0.2904
Pt    0.7897    0.3358    0.3384
Pt    0.7840    0.4315    0.3350
Pt    0.8985    0.3490    0.3497
Pt    0.8873    0.4391    0.3408
Pt    0.9409    0.4381    0.2910
Pt    0.8379    0.2869    0.2409
Pt    0.8381    0.3380    0.2902
Pt    0.8396    0.2850    0.3330
Pt    0.8435    0.3870    0.3359
Pt    0.9405    0.2893    0.3376
Pt    0.9410    0.2437    0.2882
Pt    0.7869    0.4417    0.2421
Pt    0.8337    0.4878    0.2463
Pt    0.8884    0.4878    0.2914
Pt    0.8391    0.4883    0.3391
Pt    0.7964    0.3397    0.2407
Pt    0.9463    0.3874    0.2396
Pt    0.7877    0.2896    0.3887
Pt    0.7433    0.2903    0.4394
Pt    0.7889    0.3847    0.3876
Pt    0.8329    0.3881    0.4497
Pt    0.8324    0.4366    0.3883
Pt    0.9897    0.2890    0.3786
Pt    0.8853    0.2887    0.3825
Pt    0.8439    0.2907    0.4383
Pt    0.8783    0.3887    0.3974
Pt    0.7908    0.3366    0.4412
Pt    0.7834    0.4300    0.4411
Pt    0.8890    0.3411    0.4431
Pt    0.9453    0.2858    0.4297
Pt    0.8837    0.2413    0.4322
Pt    0.8362    0.3360    0.3910
Pt    0.8884    0.2884    0.4877
Pt    0.9391    0.2401    0.4821
Pt    0.7949    0.4848    0.3879
Pt    0.9388    0.2400    0.3800
Pt    0.9048    0.2995    0.5713
Pt    0.7949    0.3336    0.5452
Pt    0.7428    0.4851    0.5458
Pt    0.8967    0.2405    0.5357
Pt    0.8442    0.2860    0.5409
Pt    0.9430    0.2994    0.5210
Pt    0.7428    0.3849    0.5477
Pt    0.7417    0.3327    0.4979
Pt    0.7923    0.4787    0.4905
Pt    0.7840    0.3847    0.4950
Pt    0.9445    0.2443    0.5851
Pt    0.8379    0.3364    0.4931
Pt    0.9894    0.2403    0.5342
Pt    0.9859    0.2919    0.5720
Pt    0.7886    0.2827    0.4899
Pt    0.7972    0.4877    0.6862
Pt    0.7455    0.4833    0.7361
Pt    0.9427    0.2951    0.6310
Pt    0.9838    0.2966    0.6906
Pt    0.9895    0.4405    0.7356
Pt    0.9807    0.3882    0.6929
Pt    0.7462    0.4819    0.6350
Pt    0.9511    0.4887    0.7359
Pt    0.9366    0.3918    0.8372
Pt    0.8881    0.3894    0.7902
Pt    0.8414    0.4361    0.7798
Pt    0.7880    0.4381    0.8365
Pt    0.8838    0.3365    0.8384
Pt    0.9826    0.2921    0.7737
Pt    0.8879    0.4374    0.8348
Pt    0.9318    0.2825    0.8395
Pt    0.9458    0.4391    0.7808
Pt    0.8370    0.3903    0.8318
Pt    0.9340    0.3372    0.7934
Pt    0.7920    0.4839    0.7895
Pt    0.9381    0.4821    0.8391
Pt    0.9324    0.3800    0.7399
Pt    0.8442    0.4873    0.8317
Pt    0.8982    0.4441    0.7416
Pt    0.7897    0.3912    0.8836
Pt    0.7820    0.3912    0.9830
Pt    0.8891    0.2908    0.8947
Pt    0.8931    0.3906    0.8861
Pt    0.9848    0.2857    0.8851
Pt    0.7918    0.3424    0.9382
Pt    0.7874    0.4392    0.9358
Pt    0.8855    0.3414    0.9327
Pt    0.8868    0.4319    0.9432
Pt    0.9380    0.4384    0.8878
Pt    0.9420    0.3380    0.8852
Pt    0.8360    0.2917    0.9375
Pt    0.8380    0.3912    0.9327
Pt    0.9888    0.4432    0.9376
Pt    0.9424    0.2893    0.9381
Pt    0.9387    0.3870    0.9398
Pt    0.7404    0.4451    0.8873
Pt    0.8383    0.4409    0.8876
Pt    0.8380    0.3416    0.8821
Pt    0.8374    0.2398    0.9852
Pt    0.8912    0.4853    0.8884
Pt    0.9350    0.4880    0.9401
Pt    0.9860    0.3910    0.8904
Pt    0.9343    0.3431    0.9882
Pt    0.8798    0.2939    0.9853
Pt    0.9473    0.4395    0.9885
Pt    0.7874    0.2917    0.9863
Pt    0.8422    0.5407    0.0969
Pt    0.7929    0.5914    0.0947
Pt    0.9403    0.7325    0.0893
Pt    0.8306    0.6482    0.0977
Pt    0.8911    0.5848    0.0923
Pt    0.8919    0.4908    0.0945
Pt    0.8871    0.6843    0.0872
Pt    0.7863    0.5385    0.0448
Pt    0.7843    0.6411    0.0391
Pt    0.8951    0.5343    0.0384
Pt    0.8882    0.6357    0.0451
Pt    0.9373    0.6436    0.0921
Pt    0.8368    0.5981    0.0467
Pt    0.8389    0.6924    0.0420
Pt    0.9437    0.5893    0.0425
Pt    0.9324    0.6885    0.0382
Pt    0.7930    0.6958    0.9895
Pt    0.9394    0.5408    0.0932
Pt    0.9344    0.7372    0.9889
Pt    0.9874    0.6370    0.0424
Pt    0.9850    0.7369    0.0398
Pt    0.8938    0.5949    0.9941
Pt    0.8889    0.7363    0.0383
Pt    0.8319    0.4914    0.0329
Pt    0.9395    0.6420    0.9918
Pt    0.8404    0.5495    0.9989
Pt    0.7873    0.5877    0.0018
Pt    0.9884    0.5883    0.0918
Pt    0.8379    0.6390    0.9944
Pt    0.8433    0.7376    0.9915
Pt    0.9895    0.6872    0.0908
Pt    0.7966    0.5874    0.1871
Pt    0.8851    0.5873    0.1931
Pt    0.8871    0.6842    0.1882
Pt    0.7893    0.5415    0.1415
Pt    0.8380    0.6321    0.1917
Pt    0.8911    0.5329    0.1477
Pt    0.7407    0.4967    0.1441
Pt    0.8879    0.6366    0.1390
Pt    0.8391    0.5405    0.1924
Pt    0.8418    0.5907    0.1352
Pt    0.9384    0.5393    0.1987
Pt    0.9353    0.5852    0.1468
Pt    0.9360    0.6340    0.1902
Pt    0.9358    0.6878    0.1450
Pt    0.8913    0.7344    0.1363
Pt    0.7855    0.4939    0.1912
Pt    0.9842    0.6333    0.1384
Pt    0.9006    0.4904    0.1952
Pt    0.9836    0.6836    0.1949
Pt    0.7909    0.5360    0.3410
Pt    0.8350    0.5403    0.2904
Pt    0.9377    0.6393    0.2887
Pt    0.9338    0.5914    0.2459
Pt    0.9332    0.6807    0.2397
Pt    0.9891    0.6354    0.3374
Pt    0.8424    0.5807    0.2457
Pt    0.7856    0.5393    0.2421
Pt    0.9866    0.6897    0.2954
Pt    0.7833    0.4893    0.2945
Pt    0.9382    0.7368    0.2817
Pt    0.8839    0.6392    0.2423
Pt    0.9826    0.5838    0.2919
Pt    0.8887    0.5362    0.2457
Pt    0.9876    0.6310    0.2416
Pt    0.9388    0.4893    0.2503
Pt    0.8410    0.7341    0.4851
Pt    0.7981    0.5324    0.4431
Pt    0.7491    0.5864    0.4400
Pt    0.7923    0.6830    0.4888
Pt    0.7562    0.6272    0.4883
Pt    0.7495    0.5354    0.3916
Pt    0.9391    0.7353    0.3963
Pt    0.7445    0.4892    0.4473
Pt    0.7405    0.7378    0.4782
Pt    0.9480    0.7383    0.4758
Pt    0.7928    0.5940    0.5926
Pt    0.7911    0.6891    0.5811
Pt    0.8877    0.6919    0.5903
Pt    0.7983    0.6358    0.5371
Pt    0.7415    0.6405    0.5827
Pt    0.7476    0.5380    0.4897
Pt    0.8478    0.6894    0.5419
Pt    0.9489    0.6854    0.5493
Pt    0.7459    0.5432    0.5853
Pt    0.9362    0.6380    0.5933
Pt    0.8448    0.6412    0.5918
Pt    0.7438    0.5869    0.5407
Pt    0.7878    0.7345    0.5320
Pt    0.8966    0.7354    0.5318
Pt    0.7944    0.5795    0.6863
Pt    0.7869    0.6930    0.6882
Pt    0.8945    0.5968    0.6880
Pt    0.8923    0.6951    0.6920
Pt    0.7900    0.5321    0.6367
Pt    0.7852    0.6422    0.6387
Pt    0.8949    0.6457    0.6390
Pt    0.7919    0.5392    0.7357
Pt    0.9440    0.7375    0.6886
Pt    0.8411    0.5924    0.6381
Pt    0.8341    0.6955    0.6389
Pt    0.9456    0.5804    0.6331
Pt    0.9431    0.6905    0.6339
Pt    0.7433    0.5336    0.6882
Pt    0.9491    0.6464    0.6932
Pt    0.8475    0.5346    0.6762
Pt    0.8421    0.6471    0.6816
Pt    0.9343    0.5420    0.6921
Pt    0.7412    0.6338    0.6898
Pt    0.9421    0.5895    0.7380
Pt    0.8404    0.6896    0.7329
Pt    0.7438    0.5864    0.6419
Pt    0.8425    0.5878    0.7357
Pt    0.7936    0.6366    0.7322
Pt    0.9864    0.5885    0.6894
Pt    0.9881    0.6364    0.6380
Pt    0.8446    0.4926    0.7382
Pt    0.7901    0.5925    0.7845
Pt    0.7961    0.6943    0.7834
Pt    0.8891    0.5835    0.7906
Pt    0.8862    0.6851    0.7911
Pt    0.7476    0.5878    0.8414
Pt    0.7867    0.5386    0.8348
Pt    0.8402    0.5358    0.7858
Pt    0.7918    0.6428    0.8370
Pt    0.8361    0.5911    0.8295
Pt    0.8874    0.5392    0.8412
Pt    0.8350    0.6418    0.7822
Pt    0.8895    0.6386    0.8367
Pt    0.9414    0.6852    0.8380
Pt    0.9417    0.6384    0.7871
Pt    0.9395    0.5876    0.8408
Pt    0.9417    0.5359    0.7938
Pt    0.8412    0.6989    0.8415
Pt    0.9857    0.5446    0.7392
Pt    0.8932    0.6389    0.7424
Pt    0.7440    0.6871    0.8406
Pt    0.8946    0.4894    0.7853
Pt    0.7404    0.5290    0.7848
Pt    0.9431    0.6880    0.7404
Pt    0.9891    0.6877    0.7923
Pt    0.9876    0.6350    0.8343
Pt    0.9875    0.5848    0.7939
Pt    0.9848    0.5366    0.8423
Pt    0.8935    0.5437    0.7418
Pt    0.7890    0.5884    0.8883
Pt    0.7898    0.6918    0.8895
Pt    0.8904    0.5933    0.8877
Pt    0.8934    0.6864    0.8857
Pt    0.7875    0.5431    0.9487
Pt    0.7922    0.6419    0.9442
Pt    0.8898    0.5392    0.9384
Pt    0.8947    0.6373    0.9379
Pt    0.9401    0.6379    0.8870
Pt    0.9413    0.5338    0.8892
Pt    0.8440    0.5860    0.9432
Pt    0.8444    0.6924    0.9398
Pt    0.9438    0.5885    0.9404
Pt    0.9409    0.6874    0.9363
Pt    0.8385    0.6356    0.8941
Pt    0.8426    0.5420    0.8866
Pt    0.7927    0.4903    0.8824
Pt    0.9399    0.7351    0.8845
Pt    0.7421    0.5387    0.8894
Pt    0.8342    0.4906    0.9380
Pt    0.8892    0.4896    0.9846
Pt    0.9895    0.6897    0.8865
Pt    0.7420    0.5922    0.9457
Pt    0.7426    0.6362    0.8912
Pt    0.9398    0.5372    0.9818
Pt    0.7424    0.6410    0.9867
Pt    0.8891    0.6871    0.9872
Pt    0.7847    0.7817    0.9891
Pt    0.9868    0.7847    0.0920
Pt    0.7496    0.8868    0.0292
Pt    0.7957    0.9816    0.0925
Pt    0.7460    0.9388    0.0904
Pt    0.9867    0.8875    0.1885
Pt    0.8902    0.9335    0.2314
Pt    0.9375    0.9806    0.2315
Pt    0.9380    0.8359    0.1891
Pt    0.9822    0.7405    0.1467
Pt    0.9350    0.7843    0.1408
Pt    0.7482    0.9809    0.1383
Pt    0.9310    0.7414    0.2005
Pt    0.8366    0.9400    0.1895
Pt    0.7859    0.9850    0.1992
Pt    0.9882    0.7884    0.1942
Pt    0.9900    0.9389    0.2376
Pt    0.8932    0.9872    0.1836
Pt    0.9887    0.8383    0.1429
Pt    0.7920    0.8871    0.2897
Pt    0.8832    0.8837    0.2924
Pt    0.7870    0.9332    0.3405
Pt    0.8767    0.8265    0.3225
Pt    0.8914    0.9426    0.3348
Pt    0.9433    0.9391    0.2834
Pt    0.8362    0.8849    0.3378
Pt    0.9322    0.7814    0.3374
Pt    0.9380    0.8936    0.3372
Pt    0.9341    0.8394    0.2916
Pt    0.8401    0.9328    0.2894
Pt    0.7876    0.9779    0.2870
Pt    0.9401    0.7912    0.2441
Pt    0.9828    0.7408    0.3448
Pt    0.9409    0.8864    0.2434
Pt    0.9881    0.7851    0.2924
Pt    0.8913    0.9842    0.2858
Pt    0.9375    0.9884    0.3400
Pt    0.9860    0.8370    0.2389
Pt    0.9810    0.8414    0.3375
Pt    0.7861    0.9326    0.2390
Pt    0.8404    0.8935    0.2391
Pt    0.9445    0.9375    0.3942
Pt    0.7750    0.8691    0.3816
Pt    0.7932    0.7853    0.4798
Pt    0.8861    0.7816    0.3885
Pt    0.8366    0.9404    0.3898
Pt    0.8908    0.8898    0.3903
Pt    0.9259    0.8364    0.3775
Pt    0.7855    0.8290    0.4319
Pt    0.7859    0.9351    0.4381
Pt    0.8923    0.8364    0.4369
Pt    0.8912    0.9369    0.4395
Pt    0.8432    0.8346    0.3876
Pt    0.8347    0.7742    0.4315
Pt    0.8335    0.8842    0.4288
Pt    0.9441    0.7891    0.4342
Pt    0.9383    0.8848    0.4477
Pt    0.7815    0.9866    0.4856
Pt    0.8870    0.9856    0.3877
Pt    0.8346    0.8356    0.4751
Pt    0.9789    0.7946    0.3845
Pt    0.8952    0.7794    0.4750
Pt    0.7850    0.9883    0.3901
Pt    0.7431    0.8466    0.4821
Pt    0.9844    0.8402    0.4415
Pt    0.9409    0.9402    0.4858
Pt    0.8374    0.9352    0.4888
Pt    0.9349    0.9871    0.4369
Pt    0.8342    0.9839    0.4406
Pt    0.9863    0.8867    0.3900
Pt    0.7861    0.7907    0.5866
Pt    0.7847    0.8804    0.5807
Pt    0.8873    0.7910    0.5823
Pt    0.8864    0.8868    0.5853
Pt    0.8355    0.9356    0.5878
Pt    0.7925    0.8351    0.5278
Pt    0.7868    0.9382    0.5378
Pt    0.8404    0.8364    0.5826
Pt    0.8929    0.8313    0.5288
Pt    0.8875    0.9404    0.5415
Pt    0.9397    0.8397    0.5812
Pt    0.9431    0.9335    0.5949
Pt    0.8419    0.7894    0.5256
Pt    0.8371    0.8858    0.5405
Pt    0.9457    0.7823    0.5303
Pt    0.9389    0.8918    0.5364
Pt    0.9447    0.8343    0.4908
Pt    0.7855    0.9863    0.5870
Pt    0.9362    0.9875    0.5452
Pt    0.7419    0.7407    0.5861
Pt    0.8427    0.7402    0.5822
Pt    0.7441    0.7858    0.5267
Pt    0.9859    0.7837    0.5816
Pt    0.8880    0.9847    0.4917
Pt    0.8842    0.9883    0.5878
Pt    0.9891    0.8888    0.4897
Pt    0.9899    0.8866    0.5870
Pt    0.9363    0.7393    0.5852
Pt    0.8834    0.8871    0.4894
Pt    0.7915    0.8885    0.4894
Pt    0.7879    0.7947    0.6872
Pt    0.7880    0.8921    0.6872
Pt    0.8969    0.7919    0.6868
Pt    0.8860    0.8897    0.6845
Pt    0.8396    0.9491    0.6864
Pt    0.7904    0.8426    0.6346
Pt    0.7849    0.9464    0.6371
Pt    0.8421    0.8388    0.6834
Pt    0.8919    0.8379    0.6345
Pt    0.8878    0.9436    0.6356
Pt    0.9429    0.8451    0.6881
Pt    0.9445    0.9391    0.6949
Pt    0.8410    0.7885    0.6296
Pt    0.8375    0.8929    0.6342
Pt    0.9400    0.7924    0.6313
Pt    0.9463    0.8876    0.6400
Pt    0.8932    0.9389    0.7347
Pt    0.7904    0.7460    0.6365
Pt    0.9899    0.7393    0.6424
Pt    0.8394    0.7428    0.6878
Pt    0.7915    0.7447    0.7371
Pt    0.8401    0.8908    0.7326
Pt    0.9429    0.9854    0.6409
Pt    0.7891    0.9474    0.7350
Pt    0.9462    0.7863    0.7352
Pt    0.8416    0.7923    0.7337
Pt    0.9857    0.8370    0.6336
Pt    0.8916    0.7434    0.6351
Pt    0.7402    0.9530    0.6919
Pt    0.8942    0.9887    0.6903
Pt    0.7890    0.8403    0.7388
Pt    0.7919    0.7905    0.7894
Pt    0.7916    0.8947    0.7832
Pt    0.8944    0.7936    0.7814
Pt    0.8914    0.8945    0.7901
Pt    0.9435    0.9495    0.7930
Pt    0.8443    0.7442    0.7817
Pt    0.8360    0.8897    0.8366
Pt    0.7938    0.8400    0.8423
Pt    0.7910    0.7391    0.8376
Pt    0.7910    0.9426    0.8336
Pt    0.9485    0.8405    0.7849
Pt    0.7449    0.8942    0.8393
Pt    0.8393    0.7899    0.8391
Pt    0.8951    0.8355    0.8344
Pt    0.9481    0.7867    0.8356
Pt    0.8934    0.9389    0.8361
Pt    0.8886    0.7401    0.7389
Pt    0.9406    0.8814    0.8417
Pt    0.8426    0.9397    0.7772
Pt    0.8404    0.8441    0.7864
Pt    0.8905    0.7439    0.8384
Pt    0.8962    0.8461    0.7396
Pt    0.9463    0.8993    0.7503
Pt    0.8422    0.9874    0.8309
Pt    0.9423    0.7411    0.7893
Pt    0.7908    0.7899    0.8864
Pt    0.7953    0.8932    0.8880
Pt    0.9013    0.7954    0.8904
Pt    0.8886    0.8892    0.8826
Pt    0.8434    0.9455    0.8814
Pt    0.7934    0.8422    0.9354
Pt    0.7970    0.9367    0.9351
Pt    0.7458    0.8365    0.9863
Pt    0.8349    0.7872    0.9406
Pt    0.8493    0.8363    0.8875
Pt    0.7475    0.8892    0.9408
Pt    0.7422    0.9430    0.8868
Pt    0.7428    0.8473    0.8872
Pt    0.7407    0.7914    0.9361
Pt    0.7459    0.9413    0.9845
Pt    0.7490    0.9882    0.9336
Pt    0.8359    0.7448    0.8913
Pt    0.8846    0.7417    0.9363
Pt    0.7825    0.7394    0.9380
