# Supplementary material
Source: publisher figshare collection journal article supplement (https://rs.figshare.com/ndownloader/files/37464464)
Supplement: Supplementary file 2 [file 37464464 › Ordered_Nanoporous_Metals_SI/ONMs_Crystal_Structures/ONM_from_ST_CRI-ST4.cif]

data_block_1
#***********************************************************************************************
#
# On use of this cif file, please acknowledge citation to:
#
# Understanding the stability and structural properties of Ordered Nanoporous Metals towards their rational synthesis
# Jose M. Ortiz-Roldan, Salvador R. G. Balestra, Rocio Bueno-Perez, Sof�a Calero,
# Elena Garcia-Perez, C. Richard A. Catlow, A. Rabdel Ruiz-Salvador, Said Hamad
# Proc. R Soc. A 2022
#
# Contact emails: : said@upo.es, rruisal@upo.es, c.r.a.catlow@ucl.ac.uk
#
#***********************************************************************************************

_audit_creation_date         'Tue March 22 2022'
_audit_creation_method       'generated by GDIS v0.90'


_cell_length_a             78.8555
_cell_length_b             78.7601
_cell_length_c             78.8265
_cell_angle_alpha          90.00
_cell_angle_beta           90.00
_cell_angle_gamma          90.00


_symmetry_space_group_name_H-M   'P 1'
_symmetry_Int_Tables_number       1


loop_
_atom_site_label
_atom_site_fract_x
_atom_site_fract_y
_atom_site_fract_z
Pt    0.2229    0.2260    0.0522
Pt    0.0203    0.1741    0.0026
Pt    0.2225    0.1734    0.0475
Pt    0.0033    0.1243    0.0736
Pt    0.2188    0.1224    0.0963
Pt    0.1012    0.1474    0.9991
Pt    0.1996    0.1458    0.0001
Pt    0.0938    0.2439    0.0487
Pt    0.0489    0.1444    0.0993
Pt    0.1477    0.2467    0.0445
Pt    0.0488    0.1975    0.0479
Pt    0.0480    0.1964    0.0973
Pt    0.0470    0.2479    0.0966
Pt    0.2201    0.2470    0.0202
Pt    0.0927    0.1387    0.0502
Pt    0.0995    0.1475    0.1008
Pt    0.0445    0.1978    0.9994
Pt    0.0952    0.1961    0.0451
Pt    0.0992    0.1976    0.0999
Pt    0.0981    0.2482    0.0983
Pt    0.9994    0.0957    0.0998
Pt    0.2223    0.0005    0.0684
Pt    0.1426    0.0917    0.0539
Pt    0.1178    0.2457    0.0220
Pt    0.1493    0.1427    0.0445
Pt    0.2445    0.1221    0.0231
Pt    0.1501    0.1971    0.0506
Pt    0.1489    0.1964    0.0970
Pt    0.1451    0.2482    0.0990
Pt    0.2474    0.0005    0.0437
Pt    0.2464    0.0506    0.0483
Pt    0.9977    0.2220    0.1219
Pt    0.1936    0.0456    0.0486
Pt    0.1945    0.0482    0.0957
Pt    0.2222    0.1738    0.0975
Pt    0.1968    0.0956    0.0479
Pt    0.1923    0.1010    0.0992
Pt    0.9988    0.1957    0.0984
Pt    0.1986    0.1493    0.0476
Pt    0.1731    0.9994    0.0247
Pt    0.1995    0.2006    0.0486
Pt    0.2206    0.1215    0.0485
Pt    0.1961    0.9996    0.0469
Pt    0.2192    0.0759    0.0955
Pt    0.2454    0.2250    0.0238
Pt    0.2183    0.0702    0.0434
Pt    0.9980    0.1191    0.1215
Pt    0.0468    0.1701    0.0216
Pt    0.0503    0.1699    0.0733
Pt    0.0457    0.2244    0.0223
Pt    0.0467    0.2228    0.0724
Pt    0.0958    0.1224    0.0209
Pt    0.0993    0.1687    0.0269
Pt    0.0986    0.1688    0.0706
Pt    0.0958    0.2223    0.0218
Pt    0.0972    0.2208    0.0725
Pt    0.1466    0.0671    0.0226
Pt    0.1445    0.1163    0.0261
Pt    0.1436    0.1227    0.0707
Pt    0.1467    0.1716    0.0247
Pt    0.1464    0.1660    0.0717
Pt    0.1453    0.2166    0.0241
Pt    0.1459    0.2225    0.0749
Pt    0.1957    0.0251    0.0225
Pt    0.1948    0.0213    0.0740
Pt    0.1943    0.0739    0.0213
Pt    0.1953    0.0751    0.0728
Pt    0.1974    0.1191    0.0224
Pt    0.1954    0.1244    0.0728
Pt    0.1977    0.1736    0.0202
Pt    0.1980    0.1744    0.0717
Pt    0.1946    0.2214    0.0211
Pt    0.1976    0.2295    0.0745
Pt    0.2465    0.2009    0.0986
Pt    0.0230    0.1515    0.0241
Pt    0.0274    0.1442    0.0725
Pt    0.0201    0.2014    0.0242
Pt    0.0204    0.1965    0.0740
Pt    0.0743    0.1469    0.0233
Pt    0.0749    0.1483    0.0793
Pt    0.0709    0.1967    0.0223
Pt    0.0737    0.1964    0.0692
Pt    0.1195    0.0919    0.0271
Pt    0.1205    0.1440    0.0259
Pt    0.1179    0.1447    0.0673
Pt    0.1193    0.1956    0.0223
Pt    0.1226    0.1960    0.0748
Pt    0.2463    0.1722    0.0718
Pt    0.2470    0.1235    0.0720
Pt    0.1672    0.0429    0.0253
Pt    0.1688    0.0480    0.0753
Pt    0.1668    0.0936    0.0265
Pt    0.1698    0.1039    0.0760
Pt    0.1742    0.1456    0.0230
Pt    0.1707    0.1445    0.0703
Pt    0.1711    0.1985    0.0221
Pt    0.1745    0.2002    0.0750
Pt    0.2429    0.0237    0.1205
Pt    0.1470    0.9990    0.0980
Pt    0.2208    0.0474    0.0195
Pt    0.2196    0.0497    0.0714
Pt    0.2219    0.0963    0.0232
Pt    0.2234    0.0963    0.0705
Pt    0.2237    0.1478    0.0240
Pt    0.2223    0.1511    0.0736
Pt    0.2215    0.2001    0.0232
Pt    0.2228    0.1985    0.0734
Pt    0.0251    0.2481    0.1217
Pt    0.0232    0.1213    0.0971
Pt    0.2209    0.9994    0.1201
Pt    0.0227    0.1758    0.0478
Pt    0.0230    0.1704    0.0985
Pt    0.2458    0.1735    0.1222
Pt    0.0231    0.2209    0.0514
Pt    0.0189    0.2244    0.0950
Pt    0.1722    0.2471    0.0739
Pt    0.1975    0.1722    0.1191
Pt    0.0710    0.1712    0.0468
Pt    0.0781    0.1726    0.0981
Pt    0.1448    0.1458    0.0030
Pt    0.0697    0.2243    0.0470
Pt    0.0710    0.2232    0.0965
Pt    0.2214    0.2224    0.0987
Pt    0.2449    0.0966    0.0451
Pt    0.1212    0.1176    0.0471
Pt    0.1709    0.1718    0.9994
Pt    0.1249    0.1724    0.0496
Pt    0.1220    0.1715    0.0967
Pt    0.1729    0.1711    0.0922
Pt    0.1198    0.2232    0.0479
Pt    0.1212    0.2216    0.0974
Pt    0.2469    0.1477    0.0468
Pt    0.1668    0.0240    0.0525
Pt    0.1715    0.0225    0.0985
Pt    0.2461    0.1453    0.0991
Pt    0.1693    0.0724    0.0505
Pt    0.1718    0.0714    0.0961
Pt    0.2150    0.1459    0.1213
Pt    0.1714    0.1185    0.0449
Pt    0.1528    0.2202    0.1189
Pt    0.1725    0.1745    0.0459
Pt    0.2460    0.0717    0.0201
Pt    0.1740    0.2249    0.0486
Pt    0.1759    0.2230    0.0991
Pt    0.1975    0.1980    0.0991
Pt    0.2215    0.0246    0.0435
Pt    0.2214    0.0245    0.0931
Pt    0.0720    0.2482    0.0732
Pt    0.2451    0.0750    0.0725
Pt    0.0501    0.2179    0.1214
Pt    0.1690    0.1177    0.9997
Pt    0.1703    0.9986    0.0724
Pt    0.1032    0.0926    0.9990
Pt    0.2210    0.1740    0.9992
Pt    0.2451    0.1986    0.0010
Pt    0.9992    0.1492    0.0502
Pt    0.2449    0.1015    0.1002
Pt    0.2204    0.1206    0.9989
Pt    0.1425    0.0931    0.0001
Pt    0.1741    0.2460    0.0204
Pt    0.0199    0.2482    0.0241
Pt    0.0508    0.1717    0.1216
Pt    0.1210    0.2480    0.1213
Pt    0.2425    0.0514    0.0970
Pt    0.0243    0.1966    0.1199
Pt    0.2467    0.1759    0.0258
Pt    0.2457    0.0242    0.0692
Pt    0.1960    0.0239    0.1202
Pt    0.0485    0.1220    0.1224
Pt    0.2446    0.0752    0.1218
Pt    0.2446    0.0002    0.9989
Pt    0.0945    0.1943    0.9986
Pt    0.0712    0.1682    0.9989
Pt    0.1219    0.1211    0.9988
Pt    0.1968    0.0475    0.9994
Pt    0.0697    0.2224    0.9998
Pt    0.1708    0.0226    0.0003
Pt    0.0435    0.1472    0.9989
Pt    0.2159    0.0508    0.1212
Pt    0.2463    0.1462    0.9981
Pt    0.1935    0.1953    0.9983
Pt    0.9986    0.1679    0.1728
Pt    0.2199    0.0739    0.1971
Pt    0.2219    0.1753    0.1440
Pt    0.2213    0.0754    0.1477
Pt    0.0699    0.9985    0.2226
Pt    0.2230    0.0236    0.1968
Pt    0.2205    0.0232    0.1523
Pt    0.1697    0.0259    0.1953
Pt    0.1195    0.2438    0.1710
Pt    0.0745    0.1450    0.1242
Pt    0.0489    0.0485    0.1957
Pt    0.0533    0.0953    0.1489
Pt    0.0478    0.1003    0.1985
Pt    0.0508    0.1480    0.1476
Pt    0.0470    0.1492    0.1933
Pt    0.0470    0.1951    0.1459
Pt    0.0473    0.1975    0.1960
Pt    0.0211    0.9988    0.1747
Pt    0.1716    0.1919    0.1243
Pt    0.0965    0.0455    0.1948
Pt    0.0952    0.1029    0.1975
Pt    0.0999    0.1959    0.1478
Pt    0.1258    0.1977    0.1238
Pt    0.2467    0.1224    0.1717
Pt    0.1475    0.0524    0.1440
Pt    0.1445    0.0513    0.1952
Pt    0.1973    0.0486    0.2448
Pt    0.9984    0.1940    0.1513
Pt    0.1966    0.0527    0.1521
Pt    0.1945    0.0530    0.1975
Pt    0.0982    0.9999    0.1988
Pt    0.1242    0.9988    0.2217
Pt    0.1724    0.0277    0.1488
Pt    0.1206    0.2206    0.1488
Pt    0.0015    0.0463    0.1472
Pt    0.1173    0.0746    0.1953
Pt    0.1242    0.0261    0.1919
Pt    0.2209    0.2009    0.1231
Pt    0.1220    0.0257    0.1457
Pt    0.0714    0.2190    0.1953
Pt    0.2463    0.1257    0.1240
Pt    0.1952    0.0011    0.1466
Pt    0.2466    0.0245    0.2205
Pt    0.0233    0.1240    0.2474
Pt    0.0482    0.0246    0.1710
Pt    0.0462    0.0237    0.2232
Pt    0.0512    0.0681    0.1667
Pt    0.0528    0.0726    0.2209
Pt    0.9981    0.0460    0.1974
Pt    0.0472    0.1217    0.1728
Pt    0.0500    0.1243    0.2222
Pt    0.0529    0.1498    0.2467
Pt    0.0506    0.1712    0.1719
Pt    0.0492    0.1747    0.2222
Pt    0.0730    0.1236    0.2465
Pt    0.0477    0.2172    0.1689
Pt    0.0500    0.2238    0.2209
Pt    0.0974    0.0260    0.1668
Pt    0.0963    0.0236    0.2238
Pt    0.0956    0.0739    0.2231
Pt    0.0973    0.1242    0.2215
Pt    0.1195    0.9995    0.1244
Pt    0.1461    0.0022    0.1977
Pt    0.0955    0.2227    0.1705
Pt    0.0744    0.2471    0.2249
Pt    0.1488    0.0279    0.1700
Pt    0.1469    0.0245    0.2214
Pt    0.1466    0.0776    0.2192
Pt    0.9982    0.0723    0.2197
Pt    0.2181    0.0255    0.2433
Pt    0.1969    0.0230    0.1756
Pt    0.1942    0.0242    0.2175
Pt    0.0968    0.2478    0.1970
Pt    0.1984    0.0776    0.2229
Pt    0.0446    0.9994    0.1952
Pt    0.1451    0.2448    0.1446
Pt    0.0212    0.0462    0.1730
Pt    0.0226    0.0472    0.2236
Pt    0.9989    0.2193    0.1722
Pt    0.0252    0.0983    0.1696
Pt    0.0219    0.0961    0.2206
Pt    0.1234    0.0003    0.1709
Pt    0.0237    0.1468    0.1703
Pt    0.0238    0.1441    0.2200
Pt    0.0738    0.1276    0.1973
Pt    0.0226    0.1941    0.1740
Pt    0.0224    0.1967    0.2198
Pt    0.2221    0.1517    0.1720
Pt    0.1752    0.0496    0.1230
Pt    0.0829    0.0564    0.1666
Pt    0.0754    0.0476    0.2207
Pt    0.0742    0.0975    0.1721
Pt    0.0732    0.1000    0.2216
Pt    0.1484    0.0991    0.2452
Pt    0.0759    0.1472    0.1722
Pt    0.0764    0.1502    0.2251
Pt    0.0717    0.1220    0.1507
Pt    0.0739    0.1965    0.1678
Pt    0.0729    0.1959    0.2193
Pt    0.9983    0.0986    0.2477
Pt    0.0744    0.2223    0.1460
Pt    0.1940    0.2196    0.1265
Pt    0.1225    0.0519    0.1678
Pt    0.1213    0.0502    0.2195
Pt    0.1230    0.1009    0.2221
Pt    0.0735    0.0737    0.1963
Pt    0.0774    0.1751    0.1948
Pt    0.0748    0.1708    0.1470
Pt    0.0718    0.0028    0.1744
Pt    0.0692    0.0229    0.1993
Pt    0.1673    0.0545    0.1703
Pt    0.1710    0.0514    0.2202
Pt    0.0247    0.2226    0.1946
Pt    0.1251    0.1290    0.2445
Pt    0.2209    0.1223    0.1520
Pt    0.0235    0.2214    0.1454
Pt    0.2208    0.0499    0.1751
Pt    0.2234    0.0476    0.2185
Pt    0.0230    0.1709    0.1991
Pt    0.0232    0.0227    0.1972
Pt    0.0222    0.0734    0.1501
Pt    0.0274    0.0730    0.1950
Pt    0.0248    0.1224    0.1471
Pt    0.0230    0.1197    0.1967
Pt    0.0233    0.1705    0.1481
Pt    0.1741    0.0978    0.2248
Pt    0.2473    0.0230    0.1717
Pt    0.1947    0.0762    0.1720
Pt    0.2210    0.1039    0.2170
Pt    0.2461    0.1990    0.1462
Pt    0.2185    0.0991    0.1729
Pt    0.2427    0.0481    0.1473
Pt    1.0000    0.2477    0.1487
Pt    0.0492    0.0488    0.2468
Pt    0.0010    0.1710    0.2248
Pt    0.9996    0.0738    0.1747
Pt    0.0245    0.2445    0.2218
Pt    0.2445    0.0980    0.1482
Pt    0.1469    1.0000    0.1467
Pt    0.1727    0.0012    0.1743
Pt    0.0989    0.0981    0.2451
Pt    0.0241    0.1469    0.1235
Pt    0.2202    0.9998    0.1745
Pt    0.0244    0.2225    0.2450
Pt    0.1034    0.1715    0.1249
Pt    0.0510    0.2466    0.1446
Pt    0.0942    0.9993    0.1477
Pt    0.2452    0.0747    0.2222
Pt    0.1749    0.0750    0.2478
Pt    0.2215    0.0999    0.1237
Pt    0.2446    0.0748    0.1733
Pt    0.1474    0.0247    0.1239
Pt    0.1731    0.0235    0.2438
Pt    0.1227    0.0730    0.2443
Pt    0.0730    0.2464    0.1733
Pt    0.0987    0.2208    0.1236
Pt    0.0267    0.0954    0.1236
Pt    0.2397    0.1477    0.1450
Pt    0.0954    0.2468    0.1469
Pt    0.2477    0.1013    0.1970
Pt    0.1212    0.0272    0.2464
Pt    0.0284    0.2470    0.1699
Pt    0.1699    0.9987    0.1253
Pt    0.1482    0.0460    0.2465
Pt    0.0497    0.0983    0.2461
Pt    0.0475    0.2009    0.2428
Pt    0.2439    0.1751    0.1693
Pt    0.9996    0.1981    0.2456
Pt    0.0993    0.9990    0.2443
Pt    0.0746    0.1766    0.2459
Pt    0.0723    0.0765    0.2450
Pt    0.0741    0.1959    0.1242
Pt    0.1955    0.0776    0.1243
Pt    0.2037    0.1015    0.2475
Pt    0.0017    0.0682    0.1231
Pt    0.9988    0.1981    0.3481
Pt    0.9987    0.2232    0.3255
Pt    0.0990    0.0001    0.3464
Pt    0.0248    0.1755    0.2482
Pt    0.0239    0.2450    0.2742
Pt    0.2249    0.1753    0.3471
Pt    0.0496    0.2481    0.2984
Pt    0.2275    0.1232    0.3443
Pt    0.2314    0.1276    0.3001
Pt    0.0220    0.0001    0.2682
Pt    0.9997    0.0476    0.2973
Pt    0.2232    0.0728    0.3525
Pt    0.0702    0.0012    0.3226
Pt    0.0960    0.0499    0.2483
Pt    0.1973    0.9989    0.3467
Pt    0.1711    0.2016    0.3669
Pt    0.2223    0.0014    0.2734
Pt    0.1977    0.9991    0.2965
Pt    0.0023    0.1495    0.3484
Pt    0.0492    0.0481    0.2942
Pt    0.0465    0.0494    0.3491
Pt    0.1474    0.9984    0.3474
Pt    0.0485    0.0998    0.2941
Pt    0.0492    0.1009    0.3463
Pt    0.1220    0.2020    0.3722
Pt    0.0504    0.1504    0.3001
Pt    0.0498    0.1502    0.3434
Pt    0.2455    0.0252    0.3205
Pt    0.0504    0.1967    0.2970
Pt    0.0464    0.2015    0.3463
Pt    0.9995    0.1975    0.2963
Pt    0.0020    0.0987    0.3487
Pt    0.9992    0.1726    0.2718
Pt    0.1729    0.0735    0.3469
Pt    0.0971    0.0463    0.2941
Pt    0.0968    0.0504    0.3463
Pt    0.2254    0.1464    0.3687
Pt    0.1022    0.0985    0.2974
Pt    0.0926    0.1000    0.3482
Pt    0.0009    0.0241    0.3238
Pt    0.0987    0.1518    0.2913
Pt    0.0975    0.1501    0.3470
Pt    0.1009    0.2046    0.2940
Pt    0.0976    0.2002    0.3464
Pt    0.1726    0.0770    0.2944
Pt    0.1235    0.9989    0.2716
Pt    0.0013    0.1232    0.2715
Pt    0.1711    0.0259    0.3470
Pt    0.1503    0.0518    0.2942
Pt    0.1446    0.0484    0.3469
Pt    0.0522    0.2471    0.2504
Pt    0.1489    0.1004    0.2958
Pt    0.1523    0.1020    0.3470
Pt    0.1510    0.1474    0.2942
Pt    0.1503    0.1471    0.3452
Pt    0.1482    0.1936    0.2986
Pt    0.1452    0.1984    0.3438
Pt    0.1730    0.0259    0.2996
Pt    0.9998    0.2221    0.2731
Pt    0.9998    0.1235    0.3255
Pt    0.0013    0.1720    0.3222
Pt    0.1978    0.0511    0.2993
Pt    0.1968    0.0501    0.3486
Pt    0.2015    0.0964    0.3014
Pt    0.1997    0.0972    0.3476
Pt    0.2039    0.1495    0.3009
Pt    0.2023    0.1496    0.3471
Pt    0.1711    0.0008    0.3227
Pt    0.1212    0.0001    0.3225
Pt    0.2268    0.0746    0.2985
Pt    0.2207    0.0007    0.3233
Pt    0.0209    0.0736    0.2480
Pt    0.2210    0.0270    0.3464
Pt    0.9991    0.0740    0.3238
Pt    0.2212    0.0269    0.2975
Pt    0.1233    0.0232    0.2923
Pt    0.0732    0.2255    0.3464
Pt    0.0017    0.0981    0.3004
Pt    0.1191    0.1283    0.2951
Pt    0.0482    0.0224    0.2721
Pt    0.0457    0.0250    0.3193
Pt    0.0498    0.0735    0.2728
Pt    0.0503    0.0759    0.3178
Pt    0.0499    0.1248    0.2703
Pt    0.0503    0.1212    0.3207
Pt    0.0512    0.1762    0.2720
Pt    0.0503    0.1763    0.3235
Pt    0.0496    0.2244    0.2735
Pt    0.0513    0.2225    0.3224
Pt    0.0971    0.0235    0.2710
Pt    0.0969    0.0250    0.3230
Pt    0.1017    0.0769    0.2691
Pt    0.0963    0.0729    0.3205
Pt    0.1009    0.1278    0.2654
Pt    0.0972    0.1245    0.3223
Pt    0.1013    0.1808    0.2737
Pt    0.0991    0.1741    0.3220
Pt    0.0961    0.2243    0.3226
Pt    0.1513    0.0232    0.2743
Pt    0.1447    0.0217    0.3234
Pt    0.1449    0.0755    0.2711
Pt    0.1477    0.0750    0.3205
Pt    0.1527    0.1255    0.2637
Pt    0.1473    0.1254    0.3180
Pt    0.1478    0.1715    0.3231
Pt    0.1978    0.0259    0.2720
Pt    0.1991    0.0259    0.3206
Pt    0.1981    0.0696    0.2720
Pt    0.2032    0.0729    0.3233
Pt    0.2027    0.1213    0.3196
Pt    0.2006    0.1739    0.3222
Pt    0.1771    0.1464    0.2739
Pt    0.2473    0.0242    0.2732
Pt    0.1748    0.1746    0.3477
Pt    0.0242    0.0487    0.2719
Pt    0.0265    0.0501    0.3216
Pt    0.0252    0.0997    0.2710
Pt    0.0254    0.0954    0.3211
Pt    0.0282    0.1487    0.2684
Pt    0.0238    0.1465    0.3218
Pt    0.0244    0.2023    0.2724
Pt    0.0245    0.1973    0.3210
Pt    0.1729    0.1724    0.2972
Pt    0.1778    0.1264    0.3448
Pt    0.0724    0.0477    0.2696
Pt    0.0715    0.0503    0.3208
Pt    0.0777    0.0995    0.2715
Pt    0.0760    0.0992    0.3208
Pt    0.0736    0.1495    0.2701
Pt    0.0735    0.1487    0.3218
Pt    0.0760    0.2025    0.2683
Pt    0.0742    0.1996    0.3201
Pt    0.1205    0.0763    0.3460
Pt    0.1763    0.1217    0.2977
Pt    0.1223    0.0489    0.2715
Pt    0.1223    0.0483    0.3180
Pt    0.1239    0.1054    0.2701
Pt    0.1251    0.1021    0.3219
Pt    0.1290    0.1534    0.2690
Pt    0.1206    0.1477    0.3226
Pt    0.1227    0.2007    0.3195
Pt    0.0780    0.1777    0.2952
Pt    0.0760    0.2270    0.2958
Pt    0.1719    0.0486    0.2699
Pt    0.1721    0.0499    0.3218
Pt    0.1750    0.1014    0.2718
Pt    0.1762    0.0971    0.3244
Pt    0.1775    0.1480    0.3194
Pt    0.1732    0.1958    0.3209
Pt    0.1220    0.0712    0.2963
Pt    0.1018    0.1573    0.2490
Pt    0.2250    0.0501    0.2699
Pt    0.2267    0.0538    0.3220
Pt    0.2223    0.0966    0.2733
Pt    0.2330    0.1008    0.3201
Pt    0.2289    0.1523    0.3242
Pt    0.2051    0.1241    0.2759
Pt    0.1216    0.2243    0.3459
Pt    0.0241    0.0229    0.2957
Pt    0.0243    0.0242    0.3468
Pt    0.1211    0.1748    0.3484
Pt    0.0239    0.0713    0.2973
Pt    0.0243    0.0738    0.3473
Pt    0.1252    0.1695    0.2976
Pt    0.0235    0.1260    0.2966
Pt    0.0246    0.1229    0.3485
Pt    0.9986    0.1239    0.3704
Pt    0.0246    0.1706    0.2936
Pt    0.0231    0.1747    0.3470
Pt    0.0979    0.1256    0.3711
Pt    0.0245    0.2225    0.2978
Pt    0.0210    0.2224    0.3491
Pt    0.1225    0.1240    0.3477
Pt    0.0715    0.0223    0.2976
Pt    0.0767    0.0229    0.3475
Pt    0.0723    0.1747    0.3479
Pt    0.0761    0.0739    0.2944
Pt    0.0704    0.0716    0.3461
Pt    0.1205    0.0260    0.3481
Pt    0.0793    0.1253    0.2929
Pt    0.0727    0.1255    0.3460
Pt    0.0729    0.1519    0.3726
Pt    0.9998    0.0744    0.2749
Pt    0.0232    0.1981    0.3717
Pt    0.1743    0.0969    0.3729
Pt    0.1472    0.2244    0.3701
Pt    0.0979    0.0007    0.2966
Pt    0.0255    0.2471    0.3210
Pt    0.1239    0.1021    0.3706
Pt    0.0721    0.1995    0.3716
Pt    0.2438    0.0010    0.2980
Pt    0.1465    0.1740    0.3702
Pt    0.0206    0.0517    0.3721
Pt    0.0450    0.2246    0.3710
Pt    0.1998    0.1274    0.3716
Pt    0.1491    0.1256    0.3702
Pt    0.9987    0.0231    0.3688
Pt    0.2212    0.9990    0.3710
Pt    0.0482    0.1264    0.3701
Pt    0.1455    0.0753    0.3702
Pt    0.1708    0.0493    0.3708
Pt    0.0995    0.2252    0.3722
Pt    0.1488    0.9997    0.2982
Pt    0.0470    0.0255    0.3700
Pt    0.1460    0.0220    0.3692
Pt    0.0221    0.9993    0.3716
Pt    0.0211    0.0258    0.2501
Pt    0.2474    0.0990    0.2492
Pt    0.0990    0.1737    0.3718
Pt    0.9999    0.0745    0.3711
Pt    0.1236    0.1490    0.3711
Pt    0.0721    0.9987    0.3725
Pt    0.0505    0.0743    0.3726
Pt    0.0241    0.1491    0.3724
Pt    0.0005    0.1470    0.2482
Pt    0.2456    0.0025    0.2482
Pt    0.0470    0.9994    0.2488
Pt    0.2240    0.0744    0.2486
Pt    0.0729    0.0203    0.2479
Pt    0.2234    0.2228    0.4458
Pt    0.1241    0.0005    0.4726
Pt    0.2245    0.2253    0.3932
Pt    0.1203    0.9984    0.3729
Pt    0.2259    0.1754    0.4480
Pt    0.2231    0.1688    0.3967
Pt    0.2265    0.1267    0.4478
Pt    0.2268    0.1258    0.3996
Pt    0.2208    0.0734    0.4471
Pt    0.2238    0.0767    0.3972
Pt    0.9983    0.2004    0.3987
Pt    0.9980    0.0499    0.4962
Pt    0.0484    0.0489    0.3944
Pt    0.0470    0.0481    0.4471
Pt    0.0475    0.1035    0.4000
Pt    0.0469    0.0990    0.4458
Pt    0.0492    0.1493    0.3950
Pt    0.0489    0.1515    0.4462
Pt    0.0486    0.2033    0.3963
Pt    0.0490    0.2003    0.4489
Pt    0.9978    0.2259    0.3736
Pt    0.1495    0.0014    0.4958
Pt    0.0972    0.0487    0.4007
Pt    0.0993    0.0493    0.4496
Pt    0.0979    0.1046    0.3978
Pt    0.0976    0.1007    0.4469
Pt    0.0991    0.1485    0.4006
Pt    0.0969    0.1486    0.4494
Pt    0.1020    0.2020    0.3949
Pt    0.0990    0.2007    0.4427
Pt    0.1749    0.1500    0.3748
Pt    0.1486    0.9988    0.3942
Pt    0.1482    0.0492    0.3969
Pt    0.1459    0.0499    0.4461
Pt    0.1487    0.0991    0.3943
Pt    0.1487    0.0999    0.4458
Pt    0.1500    0.1512    0.3954
Pt    0.1475    0.1497    0.4470
Pt    0.1486    0.2002    0.3942
Pt    0.1499    0.2003    0.4482
Pt    0.9991    0.1261    0.4201
Pt    0.9986    0.2013    0.4471
Pt    0.1950    0.0478    0.3955
Pt    0.1988    0.0464    0.4494
Pt    0.2005    0.1009    0.3954
Pt    0.1954    0.0981    0.4497
Pt    0.2008    0.1474    0.3985
Pt    0.2028    0.1514    0.4467
Pt    0.1976    0.2022    0.3932
Pt    0.1991    0.2001    0.4435
Pt    0.2242    0.0214    0.4467
Pt    0.2198    0.0257    0.4003
Pt    0.2467    0.9999    0.4481
Pt    0.1745    0.2267    0.4449
Pt    0.1734    0.2259    0.3939
Pt    0.1722    0.1761    0.4445
Pt    0.1760    0.1757    0.3951
Pt    0.1743    0.1270    0.4448
Pt    0.1750    0.1242    0.3994
Pt    0.1727    0.0696    0.4499
Pt    0.1717    0.0743    0.3962
Pt    0.1716    0.0232    0.4447
Pt    0.1737    1.0000    0.4224
Pt    0.1714    0.0245    0.3919
Pt    0.1240    0.2270    0.4465
Pt    0.0451    0.1741    0.3745
Pt    0.0463    0.0228    0.4250
Pt    0.0464    0.0211    0.4746
Pt    0.1991    0.0247    0.3730
Pt    0.0476    0.0755    0.4210
Pt    0.0495    0.0737    0.4738
Pt    0.9984    0.2256    0.4750
Pt    0.0464    0.1275    0.4244
Pt    0.0477    0.1256    0.4732
Pt    0.0240    0.1007    0.3742
Pt    0.0477    0.1755    0.4242
Pt    0.0464    0.1754    0.4745
Pt    0.1710    0.9988    0.4710
Pt    0.0461    0.2253    0.4224
Pt    0.0474    0.2246    0.4689
Pt    0.0001    0.1021    0.3973
Pt    0.0976    0.0245    0.4251
Pt    0.0956    0.0251    0.4733
Pt    0.1740    0.2441    0.4736
Pt    0.0971    0.0773    0.4214
Pt    0.1011    0.0761    0.4712
Pt    0.2465    0.0494    0.4451
Pt    0.0951    0.1257    0.4255
Pt    0.0969    0.1214    0.4714
Pt    0.2469    0.2260    0.4197
Pt    0.0998    0.1756    0.4197
Pt    0.0979    0.1763    0.4701
Pt    0.1254    0.1721    0.4950
Pt    0.0999    0.2258    0.4226
Pt    0.0971    0.2274    0.4728
Pt    0.9985    0.1739    0.3733
Pt    0.1484    0.0238    0.4207
Pt    0.1473    0.0239    0.4704
Pt    0.9979    0.0982    0.4951
Pt    0.1477    0.0759    0.4190
Pt    0.1468    0.0781    0.4716
Pt    0.1979    0.9993    0.4492
Pt    0.1466    0.1258    0.4236
Pt    0.1492    0.1261    0.4710
Pt    0.9991    0.0010    0.3968
Pt    0.1505    0.1775    0.4206
Pt    0.1502    0.1763    0.4706
Pt    0.1970    0.0735    0.3748
Pt    0.1492    0.2247    0.4231
Pt    0.1469    0.2249    0.4712
Pt    0.9991    0.0991    0.4458
Pt    0.1970    0.0226    0.4232
Pt    0.1966    0.0217    0.4734
Pt    0.2012    0.0470    0.4936
Pt    0.1963    0.0736    0.4222
Pt    0.1977    0.0728    0.4722
Pt    0.0247    0.1240    0.4960
Pt    0.2016    0.1239    0.4246
Pt    0.1976    0.1262    0.4745
Pt    0.2262    0.1024    0.3737
Pt    0.2001    0.1761    0.4207
Pt    0.1973    0.1748    0.4692
Pt    0.2001    0.2249    0.4188
Pt    0.2020    0.2255    0.4693
Pt    0.9977    0.0718    0.4244
Pt    0.1751    0.1765    0.4938
Pt    0.2231    0.1979    0.3740
Pt    0.1230    0.0225    0.3994
Pt    0.0203    0.0477    0.4256
Pt    0.0245    0.0511    0.4719
Pt    0.0746    0.2236    0.4488
Pt    0.0225    0.1000    0.4224
Pt    0.0220    0.0998    0.4721
Pt    0.0723    0.2264    0.3938
Pt    0.0237    0.1525    0.4247
Pt    0.0239    0.1508    0.4715
Pt    0.0742    0.1790    0.4459
Pt    0.0235    0.2016    0.4222
Pt    0.0244    0.2009    0.4720
Pt    0.0243    0.2255    0.4964
Pt    0.2470    0.1996    0.4967
Pt    0.0960    0.0011    0.3997
Pt    0.0734    0.1758    0.3959
Pt    0.0714    0.0487    0.4244
Pt    0.0726    0.0490    0.4710
Pt    0.0707    0.1253    0.4475
Pt    0.0714    0.1020    0.4233
Pt    0.0727    0.0989    0.4714
Pt    0.1172    0.0512    0.3736
Pt    0.0733    0.1489    0.4233
Pt    0.0729    0.1530    0.4718
Pt    0.2474    0.0208    0.4743
Pt    0.0726    0.2006    0.4189
Pt    0.0736    0.1989    0.4732
Pt    0.1228    0.2257    0.3967
Pt    0.1224    0.1752    0.4462
Pt    0.1250    0.1750    0.3965
Pt    0.0732    0.1257    0.3992
Pt    0.1227    0.0498    0.4230
Pt    0.1257    0.0522    0.4731
Pt    0.0740    0.0504    0.3750
Pt    0.1221    0.1025    0.4223
Pt    0.1240    0.1012    0.4717
Pt    0.0784    0.1245    0.4953
Pt    0.1252    0.1504    0.4197
Pt    0.1218    0.1476    0.4716
Pt    0.0979    0.1513    0.4921
Pt    0.1256    0.1994    0.4214
Pt    0.1230    0.2004    0.4700
Pt    0.1215    0.1264    0.4452
Pt    0.1248    0.1249    0.3963
Pt    0.1201    0.0756    0.4436
Pt    0.1970    0.2040    0.4969
Pt    0.1715    0.0508    0.4236
Pt    0.1726    0.0479    0.4745
Pt    0.2243    0.2238    0.4952
Pt    0.1754    0.1019    0.4223
Pt    0.1706    0.0999    0.4706
Pt    0.0985    0.2023    0.4960
Pt    0.1730    0.1525    0.4213
Pt    0.1734    0.1522    0.4690
Pt    0.0747    0.0722    0.4482
Pt    0.1765    0.2017    0.4171
Pt    0.1757    0.2021    0.4693
Pt    0.0725    0.0739    0.4008
Pt    0.1232    0.0777    0.3951
Pt    0.1230    0.0267    0.4480
Pt    0.0733    0.0217    0.4487
Pt    0.2218    0.0515    0.4226
Pt    0.2230    0.0493    0.4709
Pt    0.0723    0.0244    0.4005
Pt    0.2232    0.0977    0.4231
Pt    0.2246    0.0976    0.4727
Pt    0.0221    0.2246    0.4467
Pt    0.2251    0.1502    0.4230
Pt    0.2249    0.1443    0.4770
Pt    0.2233    0.2016    0.4173
Pt    0.2218    0.1966    0.4701
Pt    0.0244    0.0226    0.3990
Pt    0.0218    0.0219    0.4494
Pt    0.0216    0.0733    0.3985
Pt    0.0220    0.0739    0.4467
Pt    0.0249    0.1265    0.3986
Pt    0.0225    0.1244    0.4495
Pt    0.0212    0.1760    0.3984
Pt    0.0239    0.1742    0.4486
Pt    0.0237    0.2261    0.3976
Pt    0.2250    0.0754    0.4963
Pt    0.0478    0.0511    0.4964
Pt    0.1476    0.0993    0.4969
Pt    0.0977    0.0260    0.3735
Pt    0.1985    0.2472    0.3937
Pt    0.1491    0.0508    0.4974
Pt    0.1494    0.1487    0.4947
Pt    0.2442    0.9987    0.3989
Pt    0.1939    0.1492    0.4963
Pt    0.9991    0.1715    0.4233
Pt    0.0477    0.0995    0.4942
Pt    0.1241    0.0031    0.4246
Pt    0.0231    0.0240    0.4965
Pt    0.0719    0.0745    0.4972
Pt    0.2241    0.0467    0.3752
Pt    0.9984    0.1525    0.4949
Pt    0.1479    0.2011    0.4948
Pt    0.2465    0.0489    0.4958
Pt    0.0971    0.0977    0.4958
Pt    0.0966    0.0782    0.3732
Pt    0.0978    0.0515    0.4961
Pt    0.1736    0.0229    0.4978
Pt    0.1229    0.0263    0.4950
Pt    0.2188    0.1748    0.4948
Pt    0.0482    0.2020    0.4975
Pt    0.1982    0.1007    0.4966
Pt    0.1232    0.1243    0.4973
Pt    0.1976    0.1757    0.3732
Pt    0.0705    0.1028    0.3730
Pt    0.2221    0.2253    0.5972
Pt    0.2222    0.2254    0.5462
Pt    0.0488    0.1499    0.4996
Pt    0.1705    0.0012    0.5225
Pt    0.1217    0.2250    0.4984
Pt    0.9987    0.1993    0.5963
Pt    0.2233    0.1729    0.5968
Pt    0.1247    0.0022    0.5194
Pt    0.0010    0.1243    0.5189
Pt    0.0227    0.0006    0.5741
Pt    0.9983    0.1740    0.5679
Pt    0.0005    0.0780    0.5739
Pt    0.0765    0.0001    0.5726
Pt    0.2476    0.2246    0.5725
Pt    0.1484    0.9985    0.5970
Pt    0.0737    0.0248    0.5970
Pt    0.9987    0.0747    0.5236
Pt    0.2229    0.1996    0.6191
Pt    0.1717    0.2481    0.5724
Pt    0.0447    0.0457    0.5466
Pt    0.0472    0.0511    0.5989
Pt    0.0726    0.0241    0.5477
Pt    0.0492    0.0992    0.5470
Pt    0.0481    0.0979    0.5966
Pt    0.0213    0.0531    0.6217
Pt    0.0486    0.1506    0.5466
Pt    0.0453    0.1514    0.5960
Pt    0.2243    0.0738    0.5477
Pt    0.0482    0.2006    0.5499
Pt    0.0467    0.1973    0.5960
Pt    0.0995    0.9985    0.5443
Pt    0.2232    0.0751    0.5979
Pt    0.9998    0.2023    0.4980
Pt    0.1212    0.2263    0.5500
Pt    0.0946    0.0498    0.5498
Pt    0.0993    0.0498    0.5967
Pt    0.1207    0.0753    0.5464
Pt    0.0977    0.1006    0.5480
Pt    0.0965    0.0988    0.5947
Pt    0.1234    0.1742    0.5440
Pt    0.1004    0.1495    0.5426
Pt    0.0976    0.1500    0.5956
Pt    0.1973    0.2469    0.4994
Pt    0.1009    0.1993    0.5502
Pt    0.0978    0.1976    0.5958
Pt    0.1226    0.0251    0.5983
Pt    0.1194    0.0244    0.5474
Pt    0.0220    0.2254    0.5970
Pt    0.1964    0.2240    0.6212
Pt    0.1477    0.0499    0.5470
Pt    0.1458    0.0507    0.5967
Pt    0.1243    0.1744    0.5989
Pt    0.1464    0.0993    0.5471
Pt    0.1508    0.1020    0.5972
Pt    0.1233    0.1235    0.5964
Pt    0.1469    0.1473    0.5488
Pt    0.1480    0.1488    0.5977
Pt    0.2222    0.0204    0.5931
Pt    0.1454    0.1995    0.5473
Pt    0.1482    0.1989    0.5979
Pt    0.2224    0.0225    0.5499
Pt    0.0192    0.2280    0.5451
Pt    0.1227    0.0759    0.5987
Pt    0.0722    0.2240    0.5962
Pt    0.1976    0.0479    0.5484
Pt    0.1984    0.0453    0.5952
Pt    0.0735    0.1247    0.5933
Pt    0.1975    0.0984    0.5470
Pt    0.1966    0.0972    0.5964
Pt    0.1739    0.1721    0.5980
Pt    0.1952    0.1504    0.5447
Pt    0.1988    0.1479    0.5963
Pt    0.0734    0.1257    0.5448
Pt    0.1955    0.1992    0.5475
Pt    0.1978    0.1978    0.5981
Pt    0.2235    0.1736    0.5454
Pt    0.1724    0.1741    0.5491
Pt    0.1235    0.1245    0.5436
Pt    0.0713    0.2257    0.5480
Pt    0.0230    0.1771    0.5978
Pt    0.1233    0.2237    0.6007
Pt    0.2273    0.1217    0.5000
Pt    0.0728    0.0725    0.5972
Pt    0.0681    0.0722    0.5493
Pt    0.2227    0.1222    0.5961
Pt    0.0488    0.0258    0.5201
Pt    0.0459    0.0253    0.5731
Pt    0.0471    0.0741    0.5219
Pt    0.0476    0.0735    0.5727
Pt    0.0498    0.1264    0.5219
Pt    0.0474    0.1271    0.5727
Pt    0.0491    0.1766    0.5236
Pt    0.0490    0.1757    0.5726
Pt    0.0478    0.2211    0.5238
Pt    0.0442    0.2251    0.5716
Pt    0.0961    0.0279    0.5205
Pt    0.0965    0.0257    0.5736
Pt    0.0948    0.0720    0.5235
Pt    0.0992    0.0744    0.5719
Pt    0.0952    0.1229    0.5218
Pt    0.0990    0.1241    0.5713
Pt    0.1008    0.1773    0.5181
Pt    0.0990    0.1706    0.5697
Pt    0.0947    0.2254    0.5249
Pt    0.0973    0.2237    0.5749
Pt    0.1459    0.0254    0.5226
Pt    0.1474    0.0262    0.5730
Pt    0.1477    0.0753    0.5209
Pt    0.1484    0.0759    0.5736
Pt    0.1491    0.1241    0.5220
Pt    0.1503    0.1253    0.5715
Pt    0.1496    0.1770    0.5206
Pt    0.1471    0.1705    0.5727
Pt    0.1472    0.2233    0.5207
Pt    0.1461    0.2218    0.5747
Pt    0.1968    0.0223    0.5241
Pt    0.1955    0.0222    0.5726
Pt    0.1991    0.0725    0.5211
Pt    0.2003    0.0734    0.5724
Pt    0.1982    0.1244    0.5206
Pt    0.1966    0.1249    0.5715
Pt    0.1993    0.1740    0.5222
Pt    0.1985    0.1738    0.5716
Pt    0.1975    0.2243    0.5255
Pt    0.1987    0.2229    0.5713
Pt    0.2218    0.1252    0.5466
Pt    0.1722    0.0239    0.5485
Pt    0.0226    0.0494    0.5214
Pt    0.0238    0.0505    0.5713
Pt    0.0267    0.1046    0.5216
Pt    0.0249    0.0983    0.5708
Pt    0.0231    0.1481    0.5192
Pt    0.0219    0.1520    0.5725
Pt    0.0224    0.1995    0.5245
Pt    0.0208    0.1969    0.5706
Pt    0.1741    0.1247    0.5969
Pt    0.1733    0.1217    0.5458
Pt    0.0704    0.0482    0.5242
Pt    0.0690    0.0508    0.5733
Pt    0.0714    0.1001    0.5215
Pt    0.0727    0.0994    0.5705
Pt    0.0722    0.1495    0.5213
Pt    0.0730    0.1486    0.5698
Pt    0.0759    0.1980    0.5246
Pt    0.0737    0.2004    0.5722
Pt    0.1723    0.0735    0.5972
Pt    0.0748    0.1732    0.5932
Pt    0.1212    0.0500    0.5251
Pt    0.1218    0.0503    0.5703
Pt    0.1236    0.1006    0.5212
Pt    0.1221    0.0980    0.5731
Pt    0.1258    0.1498    0.5192
Pt    0.1237    0.1462    0.5734
Pt    0.1221    0.2006    0.5199
Pt    0.1232    0.1974    0.5755
Pt    0.1737    0.2248    0.5992
Pt    0.1721    0.0739    0.5476
Pt    0.1719    0.0485    0.5215
Pt    0.1714    0.0491    0.5721
Pt    0.1724    0.0982    0.5218
Pt    0.1734    0.0984    0.5717
Pt    0.1714    0.1526    0.5204
Pt    0.1751    0.1484    0.5699
Pt    0.1717    0.1980    0.5215
Pt    0.1745    0.2008    0.5745
Pt    0.0728    0.1751    0.5483
Pt    0.0249    0.1727    0.5444
Pt    0.2225    0.0470    0.5207
Pt    0.2240    0.0477    0.5735
Pt    0.2227    0.0981    0.5235
Pt    0.2237    0.0997    0.5712
Pt    0.2210    0.1481    0.5234
Pt    0.2242    0.1483    0.5714
Pt    0.2221    0.1961    0.5223
Pt    0.2229    0.2020    0.5719
Pt    0.1731    0.2222    0.5472
Pt    0.0211    0.0246    0.5498
Pt    0.0220    0.0263    0.5960
Pt    0.0963    0.1716    0.6226
Pt    0.0243    0.0743    0.5460
Pt    0.0236    0.0742    0.5973
Pt    0.1704    0.0256    0.5991
Pt    0.0241    0.1233    0.5469
Pt    0.0236    0.1253    0.5971
Pt    0.1713    0.9983    0.5709
Pt    0.0236    0.0011    0.6204
Pt    0.1459    0.2476    0.5522
Pt    0.0223    0.0982    0.6201
Pt    0.1502    0.1730    0.6226
Pt    0.0718    0.2475    0.6215
Pt    0.2464    0.0213    0.6188
Pt    0.9982    0.1455    0.5451
Pt    0.9980    0.0488    0.5500
Pt    0.2219    0.0003    0.5239
Pt    0.2229    0.0993    0.6212
Pt    0.0453    0.0014    0.5480
Pt    0.0743    0.1004    0.6219
Pt    0.0199    0.1487    0.6199
Pt    0.1756    0.1013    0.6218
Pt    0.9988    0.0249    0.5210
Pt    0.0509    0.0735    0.6222
Pt    0.1252    0.9992    0.5710
Pt    0.2460    0.2256    0.5223
Pt    0.0231    0.0023    0.5253
Pt    0.0719    0.1494    0.6195
Pt    0.0485    0.2224    0.6222
Pt    0.1225    0.1986    0.6211
Pt    0.2473    0.1745    0.5718
Pt    0.0976    0.1243    0.6191
Pt    0.0732    0.0251    0.4988
Pt    0.2477    0.1266    0.6204
Pt    0.2235    0.2482    0.5226
Pt    0.1234    0.0999    0.6226
Pt    0.2232    0.1492    0.6212
Pt    0.9993    0.0998    0.5976
Pt    0.1484    0.1243    0.6226
Pt    0.0240    0.1766    0.4996
Pt    0.0710    0.1763    0.4990
Pt    0.0714    0.1975    0.6181
Pt    0.0496    0.1730    0.6209
Pt    0.1730    0.2243    0.4998
Pt    0.1201    0.0756    0.5017
Pt    0.2008    0.1236    0.6228
Pt    0.9982    0.1237    0.6198
Pt    0.1227    0.1487    0.6228
Pt    0.2470    0.0483    0.5495
Pt    0.0482    0.0234    0.6194
Pt    0.2275    0.0475    0.6184
Pt    0.1479    0.0764    0.6210
Pt    0.0490    0.1229    0.6207
Pt    0.2002    0.0716    0.6208
Pt    0.2465    0.0741    0.5736
Pt    0.2471    0.0736    0.6210
Pt    0.2463    0.2007    0.5975
Pt    0.2456    0.1515    0.5469
Pt    0.0980    0.0740    0.6208
Pt    0.1729    0.0514    0.6207
Pt    0.0970    0.2215    0.6196
Pt    0.1739    0.1461    0.6205
Pt    0.0960    0.2480    0.5009
Pt    0.0973    0.0251    0.6213
Pt    0.1716    0.2473    0.5250
Pt    0.1723    0.1985    0.6217
Pt    0.1765    0.9985    0.6225
Pt    0.1493    0.2244    0.6220
Pt    0.0224    0.1985    0.6210
Pt    0.1740    0.1235    0.4979
Pt    0.0993    0.0009    0.4984
Pt    0.0221    0.0736    0.4987
Pt    0.2219    0.0222    0.4981
Pt    0.1758    0.0736    0.4988
Pt    0.0724    0.2265    0.4982
Pt    0.9986    0.1018    0.6999
Pt    0.0468    0.2482    0.7452
Pt    0.2477    0.1459    0.7458
Pt    0.0457    0.0014    0.6485
Pt    0.9981    0.2199    0.6737
Pt    0.0231    0.9990    0.7231
Pt    0.0717    0.2481    0.7213
Pt    0.1213    0.2467    0.6259
Pt    0.0960    0.2465    0.6466
Pt    0.0214    0.2451    0.6728
Pt    0.9983    0.1250    0.6716
Pt    0.1979    0.0228    0.6230
Pt    0.0423    0.0435    0.6473
Pt    0.0477    0.0490    0.6963
Pt    0.0463    0.0984    0.6437
Pt    0.0470    0.0990    0.6961
Pt    0.0454    0.1470    0.6424
Pt    0.0467    0.1519    0.6961
Pt    0.0473    0.1989    0.6448
Pt    0.0468    0.1975    0.6989
Pt    0.0467    0.9992    0.6976
Pt    0.2475    0.2479    0.6485
Pt    0.0987    0.0504    0.6475
Pt    0.0991    0.0511    0.6939
Pt    0.0982    0.0966    0.6461
Pt    0.1014    0.1011    0.6968
Pt    0.0983    0.1499    0.6472
Pt    0.0977    0.1472    0.6957
Pt    0.0957    0.1981    0.6448
Pt    0.0994    0.1962    0.6958
Pt    0.1220    0.0490    0.6232
Pt    0.1214    0.0708    0.7454
Pt    0.1502    0.0506    0.6429
Pt    0.1480    0.0476    0.6961
Pt    0.1488    0.1006    0.6455
Pt    0.1433    0.0998    0.6994
Pt    0.1493    0.1490    0.6471
Pt    0.1511    0.1448    0.6995
Pt    0.1481    0.1970    0.6469
Pt    0.1476    0.1962    0.6967
Pt    0.0170    0.0238    0.6474
Pt    0.2226    0.1995    0.7233
Pt    0.1978    0.0474    0.6440
Pt    0.1963    0.0449    0.6977
Pt    0.2010    0.1003    0.6444
Pt    0.1970    0.1001    0.6974
Pt    0.1963    0.1508    0.6509
Pt    0.2019    0.1488    0.6992
Pt    0.1994    0.1963    0.6470
Pt    0.1984    0.1989    0.6989
Pt    0.2260    0.1978    0.6722
Pt    0.9989    0.1501    0.6945
Pt    0.2240    0.1266    0.6485
Pt    0.0741    0.1237    0.6976
Pt    0.2224    0.1485    0.7240
Pt    0.2219    0.0224    0.6479
Pt    0.0747    0.1237    0.6465
Pt    0.2217    0.1518    0.6708
Pt    0.0723    0.0750    0.6987
Pt    0.1967    0.0494    0.7462
Pt    0.0725    0.9989    0.6726
Pt    0.0724    0.0749    0.6500
Pt    0.1972    0.2455    0.6984
Pt    0.2242    0.2232    0.6966
Pt    0.2190    0.2240    0.6481
Pt    0.1186    0.0226    0.6991
Pt    0.0466    0.0218    0.6733
Pt    0.0486    0.0201    0.7238
Pt    0.2217    0.1238    0.6994
Pt    0.0467    0.0729    0.6723
Pt    0.0465    0.0711    0.7228
Pt    0.2210    0.0993    0.7236
Pt    0.0473    0.1218    0.6710
Pt    0.0485    0.1261    0.7176
Pt    0.0952    0.1462    0.7464
Pt    0.0475    0.1730    0.6693
Pt    0.0463    0.1703    0.7240
Pt    0.0747    0.0262    0.6949
Pt    0.0476    0.2237    0.6739
Pt    0.0494    0.2219    0.7211
Pt    0.0705    0.0233    0.6469
Pt    0.0967    0.0235    0.6695
Pt    0.0961    0.0214    0.7241
Pt    0.1239    0.0247    0.6480
Pt    0.0962    0.0751    0.6702
Pt    0.0942    0.0733    0.7221
Pt    0.0735    0.2210    0.6957
Pt    0.1005    0.1225    0.6687
Pt    0.0996    0.1225    0.7220
Pt    0.0210    0.9993    0.6735
Pt    0.0965    0.1729    0.6713
Pt    0.0977    0.1713    0.7215
Pt    0.0723    0.0494    0.6249
Pt    0.0973    0.2195    0.6736
Pt    0.0965    0.2204    0.7225
Pt    0.0976    0.1986    0.7457
Pt    0.1501    0.0242    0.6723
Pt    0.1503    0.0166    0.7206
Pt    0.2234    0.0988    0.6724
Pt    0.1512    0.0770    0.6691
Pt    0.1494    0.0714    0.7207
Pt    0.0732    0.2237    0.6461
Pt    0.1469    0.1215    0.6716
Pt    0.1472    0.1216    0.7224
Pt    0.2227    0.1744    0.6452
Pt    0.1492    0.1740    0.6730
Pt    0.1466    0.1700    0.7254
Pt    0.1719    0.2225    0.6994
Pt    0.1478    0.2215    0.6738
Pt    0.1474    0.2203    0.7238
Pt    0.0237    0.2240    0.6984
Pt    0.1985    0.0220    0.6738
Pt    0.1978    0.0184    0.7193
Pt    0.2250    0.0210    0.7002
Pt    0.1976    0.0718    0.6754
Pt    0.1967    0.0756    0.7232
Pt    0.1712    0.2217    0.6467
Pt    0.2005    0.1258    0.6732
Pt    0.1970    0.1220    0.7239
Pt    0.0223    0.2257    0.6470
Pt    0.2001    0.1760    0.6772
Pt    0.1995    0.1736    0.7250
Pt    0.0725    0.1727    0.6951
Pt    0.1982    0.2200    0.6732
Pt    0.1987    0.2212    0.7241
Pt    0.1723    0.1242    0.6498
Pt    0.0704    0.1721    0.6469
Pt    0.1742    0.1730    0.7005
Pt    0.0234    0.1745    0.6954
Pt    0.0235    0.0475    0.6729
Pt    0.0230    0.0490    0.7232
Pt    0.0229    0.1750    0.6463
Pt    0.0228    0.0995    0.6705
Pt    0.0242    0.1020    0.7204
Pt    0.1247    0.1674    0.6981
Pt    0.0239    0.1489    0.6699
Pt    0.0214    0.1475    0.7222
Pt    0.1711    0.1749    0.6475
Pt    0.0247    0.1957    0.6707
Pt    0.0250    0.1970    0.7249
Pt    0.2261    0.0467    0.7227
Pt    0.1223    0.1745    0.6432
Pt    0.1726    0.1208    0.6984
Pt    0.2221    0.0484    0.6748
Pt    0.0716    0.0483    0.6711
Pt    0.0723    0.0465    0.7195
Pt    0.0222    0.1241    0.6965
Pt    0.0736    0.0972    0.6754
Pt    0.0708    0.0976    0.7228
Pt    0.1742    0.0724    0.6974
Pt    0.0712    0.1462    0.6732
Pt    0.0723    0.1508    0.7236
Pt    0.2222    0.0721    0.7019
Pt    0.0730    0.1971    0.6722
Pt    0.0730    0.1945    0.7211
Pt    0.0235    0.1225    0.6446
Pt    0.0207    0.0749    0.6973
Pt    0.1237    0.1266    0.6978
Pt    0.1779    0.0751    0.6449
Pt    0.1258    0.0480    0.6713
Pt    0.1237    0.0467    0.7213
Pt    0.1239    0.1256    0.6445
Pt    0.1247    0.0988    0.6719
Pt    0.1198    0.0951    0.7244
Pt    0.2201    0.0732    0.6505
Pt    0.1240    0.1510    0.6693
Pt    0.1219    0.1478    0.7242
Pt    0.2237    0.1746    0.6975
Pt    0.1240    0.1981    0.6704
Pt    0.1192    0.1989    0.7214
Pt    0.1229    0.0745    0.6945
Pt    0.1736    0.0207    0.6965
Pt    0.1754    0.0193    0.6498
Pt    0.1236    0.0744    0.6477
Pt    0.1729    0.0457    0.6713
Pt    0.1725    0.0461    0.7208
Pt    0.0227    0.0748    0.6492
Pt    0.1788    0.1003    0.6702
Pt    0.1726    0.0982    0.7210
Pt    0.0736    0.0198    0.7466
Pt    0.1750    0.1467    0.6759
Pt    0.1728    0.1479    0.7247
Pt    0.0220    0.0249    0.6992
Pt    0.1736    0.1968    0.6733
Pt    0.1717    0.1948    0.7252
Pt    0.1218    0.2223    0.6962
Pt    0.1202    0.2225    0.6467
Pt    0.1471    0.2482    0.6498
Pt    0.1214    0.2476    0.6714
Pt    0.0002    0.2235    0.7252
Pt    0.2237    0.0228    0.7474
Pt    0.1743    0.0192    0.7458
Pt    0.9988    0.1723    0.6724
Pt    0.1456    0.2462    0.6962
Pt    0.0213    0.0721    0.7453
Pt    0.9997    0.0983    0.6445
Pt    0.9988    0.1985    0.7464
Pt    0.1448    0.0942    0.7468
Pt    0.2233    0.0732    0.7472
Pt    0.1244    0.0232    0.7464
Pt    0.0957    0.0453    0.7472
Pt    0.0008    0.1735    0.7204
Pt    0.2464    0.0965    0.6471
Pt    0.0203    0.0246    0.7468
Pt    0.0703    0.0700    0.7467
Pt    0.0970    0.2464    0.6990
Pt    0.1702    0.2450    0.7237
Pt    0.2469    0.2235    0.6233
Pt    0.0210    0.1711    0.7463
Pt    0.2450    0.0983    0.6974
Pt    0.1729    0.1193    0.7456
Pt    0.2441    0.0229    0.6719
Pt    0.9980    0.0716    0.7226
Pt    0.2207    0.2469    0.6726
Pt    0.0462    0.1461    0.7470
Pt    0.2456    0.1472    0.6980
Pt    0.1210    0.2451    0.7231
Pt    0.0436    0.0968    0.7473
Pt    0.9982    0.0524    0.6469
Pt    0.0198    0.1248    0.7477
Pt    0.1729    0.0758    0.7478
Pt    0.1716    0.2445    0.6728
Pt    0.1968    0.1734    0.6234
Pt    0.1480    0.0208    0.6237
Pt    0.2467    0.9992    0.8457
Pt    0.0452    0.9984    0.7995
Pt    0.1980    0.0989    0.7496
Pt    0.1966    0.2477    0.7487
Pt    0.2211    0.2237    0.8444
Pt    0.2229    0.2236    0.7970
Pt    0.1453    0.1960    0.7494
Pt    0.2464    0.2457    0.8466
Pt    0.2237    0.2468    0.7735
Pt    0.1982    0.1219    0.8700
Pt    0.2244    0.1711    0.8438
Pt    0.2217    0.1736    0.7990
Pt    0.0486    0.1987    0.7484
Pt    0.0689    0.1190    0.8475
Pt    0.0683    0.1228    0.7979
Pt    0.2474    0.1224    0.7738
Pt    0.2456    0.1474    0.7972
Pt    0.0463    0.0441    0.7996
Pt    0.0460    0.0487    0.8486
Pt    0.2208    0.2226    0.7482
Pt    0.0474    0.0959    0.7962
Pt    0.0466    0.0941    0.8501
Pt    0.2476    0.0496    0.8488
Pt    0.0413    0.1474    0.7980
Pt    0.0463    0.1447    0.8481
Pt    0.0695    0.1711    0.7963
Pt    0.0475    0.1948    0.7944
Pt    0.0433    0.1953    0.8466
Pt    0.0737    0.0731    0.8484
Pt    0.0696    0.0710    0.7953
Pt    0.9978    0.2210    0.8698
Pt    0.0198    0.2477    0.8248
Pt    0.0956    0.0463    0.7981
Pt    0.0978    0.0495    0.8471
Pt    0.0688    0.1949    0.8719
Pt    0.0971    0.0977    0.7938
Pt    0.0979    0.0970    0.8473
Pt    0.0470    0.9994    0.8483
Pt    0.0956    0.1479    0.7978
Pt    0.0974    0.1430    0.8477
Pt    0.9990    0.0707    0.8224
Pt    0.0965    0.1968    0.7994
Pt    0.0966    0.1943    0.8492
Pt    0.2470    0.1754    0.8218
Pt    0.0719    0.0219    0.8480
Pt    0.1493    0.2457    0.7948
Pt    0.0988    0.2468    0.7986
Pt    0.1472    0.0474    0.7985
Pt    0.1449    0.0438    0.8480
Pt    0.0446    0.2201    0.8716
Pt    0.1424    0.0983    0.7948
Pt    0.1471    0.0965    0.8447
Pt    0.1705    0.1208    0.7986
Pt    0.1475    0.1473    0.7967
Pt    0.1456    0.1464    0.8456
Pt    0.1707    0.0722    0.8440
Pt    0.1468    0.1948    0.7968
Pt    0.1486    0.1962    0.8466
Pt    0.1475    0.0724    0.8695
Pt    0.2473    0.2240    0.8223
Pt    0.2211    0.0244    0.7946
Pt    0.1711    0.0712    0.7958
Pt    0.1937    0.0448    0.7958
Pt    0.1967    0.0470    0.8486
Pt    0.1738    0.0222    0.8494
Pt    0.1955    0.0968    0.7989
Pt    0.1989    0.0967    0.8456
Pt    0.1710    0.0211    0.7942
Pt    0.1939    0.1441    0.7983
Pt    0.1989    0.1465    0.8476
Pt    0.2214    0.9987    0.8203
Pt    0.1978    0.1954    0.7990
Pt    0.1973    0.1961    0.8460
Pt    0.0726    1.0000    0.7760
Pt    0.1229    0.2452    0.8252
Pt    0.2227    0.1227    0.8473
Pt    0.2232    0.1243    0.7973
Pt    0.1190    0.2170    0.8487
Pt    0.2217    0.2480    0.8234
Pt    0.0987    0.2478    0.8473
Pt    0.2220    0.0736    0.8484
Pt    0.0689    0.0219    0.8015
Pt    0.1731    0.9991    0.8221
Pt    0.2181    0.0709    0.7969
Pt    0.1210    0.2223    0.7994
Pt    0.2234    0.0267    0.8499
Pt    0.0470    0.0230    0.7707
Pt    0.0458    0.0235    0.8251
Pt    0.1227    0.2454    0.7729
Pt    0.0466    0.0718    0.7698
Pt    0.0450    0.0721    0.8227
Pt    0.0220    0.2208    0.7983
Pt    0.0454    0.1216    0.7761
Pt    0.0455    0.1214    0.8218
Pt    0.0201    0.1207    0.7983
Pt    0.0457    0.1720    0.7694
Pt    0.0486    0.1698    0.8220
Pt    0.0158    0.0644    0.8528
Pt    0.0464    0.2191    0.7745
Pt    0.0490    0.2217    0.8261
Pt    0.1172    0.1686    0.8459
Pt    0.1010    0.0225    0.7739
Pt    0.0973    0.0209    0.8255
Pt    0.0233    0.0683    0.7966
Pt    0.0976    0.0702    0.7705
Pt    0.0963    0.0713    0.8200
Pt    0.0235    0.1204    0.8469
Pt    0.0950    0.1243    0.7723
Pt    0.0941    0.1200    0.8234
Pt    0.2244    0.1464    0.8230
Pt    0.0973    0.1720    0.7720
Pt    0.0944    0.1697    0.8222
Pt    0.1204    0.1708    0.7969
Pt    0.0975    0.2233    0.7759
Pt    0.0965    0.2226    0.8254
Pt    0.1235    0.1199    0.8494
Pt    0.1448    0.0200    0.7723
Pt    0.1498    0.0230    0.8225
Pt    0.2222    0.1452    0.7728
Pt    0.1485    0.0716    0.7732
Pt    0.1447    0.0717    0.8219
Pt    0.1215    0.2210    0.7480
Pt    0.1458    0.1226    0.7726
Pt    0.1468    0.1222    0.8238
Pt    0.2214    0.1978    0.7740
Pt    0.1459    0.1720    0.7724
Pt    0.1432    0.1713    0.8230
Pt    0.2223    0.0991    0.8226
Pt    0.1458    0.2213    0.7744
Pt    0.1488    0.2239    0.8222
Pt    0.1209    0.1228    0.7966
Pt    0.1974    0.0207    0.7713
Pt    0.1998    0.0245    0.8248
Pt    0.0493    0.2471    0.8485
Pt    0.1961    0.0716    0.7705
Pt    0.1976    0.0728    0.8225
Pt    0.2259    0.0967    0.7695
Pt    0.1975    0.1228    0.7719
Pt    0.1983    0.1225    0.8198
Pt    0.2253    0.0509    0.8235
Pt    0.1997    0.1703    0.7748
Pt    0.1959    0.1692    0.8218
Pt    0.1224    0.0727    0.8479
Pt    0.1975    0.2192    0.7708
Pt    0.1974    0.2237    0.8191
Pt    0.1202    0.0695    0.7962
Pt    0.1452    0.2448    0.7481
Pt    0.1188    0.0198    0.8499
Pt    0.0198    0.0479    0.7732
Pt    0.0220    0.0472    0.8230
Pt    0.0203    0.0965    0.7708
Pt    0.0239    0.0951    0.8209
Pt    0.0211    0.0227    0.8470
Pt    0.0188    0.1504    0.7736
Pt    0.0203    0.1454    0.8229
Pt    0.2227    0.0491    0.7726
Pt    0.0232    0.1974    0.7730
Pt    0.0215    0.1995    0.8227
Pt    0.2466    0.0501    0.7971
Pt    0.1716    0.2223    0.8476
Pt    0.0210    0.1716    0.8477
Pt    0.1707    0.1190    0.8461
Pt    0.0727    0.0429    0.7722
Pt    0.0686    0.0479    0.8238
Pt    0.0696    0.2225    0.8004
Pt    0.0715    0.0965    0.7739
Pt    0.0708    0.0930    0.8220
Pt    0.0221    0.0240    0.7975
Pt    0.0709    0.1472    0.7692
Pt    0.0705    0.1467    0.8246
Pt    0.1705    0.1703    0.7981
Pt    0.0742    0.1979    0.7738
Pt    0.0708    0.1967    0.8230
Pt    0.1248    0.0212    0.8005
Pt    0.1740    0.2222    0.7968
Pt    0.1471    0.2455    0.8491
Pt    0.0193    0.1745    0.8008
Pt    0.1223    0.0467    0.7735
Pt    0.1195    0.0470    0.8206
Pt    0.0714    0.2210    0.8502
Pt    0.1200    0.0948    0.7705
Pt    0.1209    0.0957    0.8192
Pt    0.1719    0.1946    0.8226
Pt    0.1208    0.1485    0.7725
Pt    0.1221    0.1437    0.8207
Pt    0.1708    0.1954    0.7744
Pt    0.1201    0.2002    0.7771
Pt    0.1198    0.1942    0.8249
Pt    0.0206    0.0017    0.8240
Pt    0.0223    0.2227    0.8455
Pt    0.1698    0.1712    0.8478
Pt    0.0716    0.1704    0.8466
Pt    0.1706    0.0449    0.7688
Pt    0.1750    0.0480    0.8243
Pt    0.2218    0.1993    0.8237
Pt    0.1718    0.0990    0.7728
Pt    0.1712    0.0966    0.8221
Pt    0.1698    0.1478    0.8239
Pt    0.1709    0.1434    0.7724
Pt    0.0670    0.2458    0.7726
Pt    0.0452    0.2459    0.7971
Pt    0.1724    0.2205    0.7485
Pt    0.0465    0.0243    0.8716
Pt    0.1217    0.0469    0.8710
Pt    0.1952    0.2459    0.8477
Pt    0.0177    0.2479    0.7723
Pt    0.2470    0.2001    0.8474
Pt    0.1695    0.0457    0.8715
Pt    0.2253    0.1751    0.7499
Pt    0.0691    0.0482    0.8725
Pt    0.0966    0.2483    0.7486
Pt    0.1453    0.2211    0.8709
Pt    0.0715    0.2225    0.7490
Pt    0.1721    0.0957    0.8701
Pt    0.1443    0.0194    0.8722
Pt    0.0174    0.0952    0.8718
Pt    0.1743    0.2462    0.7718
Pt    0.2455    0.0981    0.7987
Pt    0.2470    0.1700    0.7713
Pt    0.1239    0.1944    0.8708
Pt    0.0692    0.1224    0.7483
Pt    0.1208    0.1724    0.7490
Pt    0.2452    0.0984    0.8484
Pt    0.1954    0.0714    0.8709
Pt    0.1745    0.1708    0.7503
Pt    0.1712    0.2474    0.8714
Pt    0.1224    0.1478    0.8713
Pt    0.1232    0.1227    0.7491
Pt    0.1460    0.1694    0.8711
Pt    0.1969    0.1961    0.7492
Pt    0.1974    0.2208    0.8708
Pt    0.9984    0.0718    0.7729
Pt    0.1712    0.1430    0.8686
Pt    0.2451    0.1760    0.8693
Pt    0.0197    0.2436    0.8709
Pt    0.1988    0.0208    0.8719
Pt    0.0741    0.0986    0.8713
Pt    0.2201    0.0968    0.8728
Pt    0.0937    0.0257    0.8723
Pt    0.1185    0.0929    0.8729
Pt    0.1960    0.1457    0.7480
Pt    0.2218    0.1223    0.7485
Pt    0.1462    0.0503    0.7479
Pt    0.0723    0.1742    0.7483
Pt    0.0476    0.0446    0.7482
Pt    0.1469    0.1474    0.7487
Pt    0.0230    0.2230    0.7485
Pt    0.2468    0.1991    0.7486
Pt    0.0938    0.0986    0.7483
Pt    0.9978    0.1708    0.9726
Pt    0.2189    0.2242    0.9465
Pt    0.2225    0.2215    0.9010
Pt    0.0453    0.0462    0.8970
Pt    0.0465    0.0964    0.8944
Pt    0.0466    0.1450    0.8991
Pt    0.0430    0.1412    0.9484
Pt    0.0469    0.1945    0.9012
Pt    0.0471    0.1968    0.9469
Pt    0.0966    0.2440    0.9007
Pt    0.0964    0.0471    0.8972
Pt    0.0935    0.0459    0.9473
Pt    0.0907    0.0935    0.8985
Pt    0.0955    0.0943    0.9496
Pt    0.0979    0.1467    0.8990
Pt    0.0954    0.1463    0.9461
Pt    0.0998    0.1956    0.8946
Pt    0.0935    0.1950    0.9465
Pt    0.0730    0.2450    0.9754
Pt    0.9985    0.1949    0.9474
Pt    0.1454    0.0472    0.8990
Pt    0.1452    0.0467    0.9467
Pt    0.1460    0.0944    0.8954
Pt    0.1474    0.0957    0.9501
Pt    0.1464    0.1501    0.8984
Pt    0.1489    0.1467    0.9501
Pt    0.1479    0.1961    0.8991
Pt    0.1456    0.1935    0.9493
Pt    0.1711    0.2445    0.9712
Pt    0.0967    0.1207    0.8748
Pt    0.1934    0.0461    0.8971
Pt    0.1953    0.0491    0.9481
Pt    0.1939    0.0944    0.8968
Pt    0.1961    0.0958    0.9471
Pt    0.1962    0.1487    0.8956
Pt    0.1936    0.1473    0.9493
Pt    0.1972    0.1973    0.8972
Pt    0.1987    0.1953    0.9469
Pt    0.2233    0.1734    0.9457
Pt    0.2227    0.1721    0.8975
Pt    0.2186    0.2466    0.9210
Pt    0.2471    0.1985    0.8954
Pt    0.0447    0.2454    0.9491
Pt    0.0444    0.1220    0.9212
Pt    0.0496    0.1699    0.9243
Pt    0.0483    0.1703    0.9761
Pt    0.0488    0.2230    0.9242
Pt    0.0454    0.2221    0.9729
Pt    0.0949    0.0217    0.9211
Pt    0.0948    0.0712    0.9233
Pt    0.0949    0.0705    0.9704
Pt    0.0943    0.1190    0.9254
Pt    0.0953    0.1216    0.9729
Pt    0.0958    0.1721    0.9216
Pt    0.0942    0.1708    0.9738
Pt    0.0946    0.2186    0.9221
Pt    0.0935    0.2190    0.9734
Pt    0.1450    0.0215    0.9236
Pt    0.1460    0.0187    0.9720
Pt    0.1487    0.0729    0.9212
Pt    0.1440    0.0697    0.9741
Pt    0.1471    0.1202    0.9229
Pt    0.1429    0.1232    0.9732
Pt    0.1488    0.1723    0.9256
Pt    0.1474    0.1694    0.9748
Pt    0.1462    0.2182    0.9230
Pt    0.1461    0.2188    0.9703
Pt    0.1941    0.0224    0.9255
Pt    0.1951    0.0187    0.9737
Pt    0.1956    0.0706    0.9230
Pt    0.1921    0.0734    0.9731
Pt    0.1988    0.1186    0.9197
Pt    0.1955    0.1204    0.9743
Pt    0.1946    0.1729    0.9239
Pt    0.1967    0.1718    0.9706
Pt    0.1957    0.2234    0.9205
Pt    0.1957    0.2233    0.9728
Pt    0.1219    0.2478    0.9739
Pt    0.0193    0.1433    0.9211
Pt    0.0201    0.1462    0.9744
Pt    0.0230    0.1931    0.9263
Pt    0.0231    0.1930    0.9726
Pt    0.0691    0.0448    0.9213
Pt    0.0628    0.0905    0.9219
Pt    0.0730    0.0966    0.9776
Pt    0.0690    0.1448    0.9230
Pt    0.0719    0.1435    0.9679
Pt    0.0719    0.1969    0.9216
Pt    0.0679    0.1980    0.9748
Pt    0.1699    0.9986    0.9236
Pt    0.1183    0.0465    0.9231
Pt    0.1235    0.0447    0.9678
Pt    0.1213    0.0994    0.9256
Pt    0.1197    0.0982    0.9713
Pt    0.1246    0.1482    0.9237
Pt    0.1190    0.1472    0.9708
Pt    0.1216    0.1955    0.9231
Pt    0.1168    0.1968    0.9721
Pt    0.2446    0.1009    0.9970
Pt    0.1472    0.1197    0.8735
Pt    0.1721    0.0463    0.9205
Pt    0.1693    0.0458    0.9717
Pt    0.1716    0.0958    0.9227
Pt    0.1680    0.0971    0.9756
Pt    0.1711    0.1442    0.9195
Pt    0.1695    0.1439    0.9779
Pt    0.1747    0.1988    0.9193
Pt    0.1703    0.1955    0.9727
Pt    0.2232    0.1210    0.9489
Pt    0.2196    0.1214    0.8953
Pt    0.2204    0.0465    0.9243
Pt    0.2195    0.0505    0.9705
Pt    0.2230    0.0954    0.9225
Pt    0.2205    0.0964    0.9705
Pt    0.2181    0.1467    0.9245
Pt    0.2214    0.1462    0.9714
Pt    0.2225    0.1983    0.9214
Pt    0.2221    0.1968    0.9724
Pt    0.0185    0.1216    0.8974
Pt    0.0234    0.1685    0.9016
Pt    0.0233    0.1679    0.9492
Pt    0.0224    0.2194    0.9016
Pt    0.0210    0.2205    0.9467
Pt    0.0697    0.0216    0.8956
Pt    0.0976    0.2464    0.9972
Pt    0.0704    0.0674    0.8970
Pt    0.0693    0.0712    0.9482
Pt    0.0734    0.1192    0.9005
Pt    0.0667    0.1140    0.9494
Pt    0.0683    0.1710    0.8970
Pt    0.0701    0.1723    0.9500
Pt    0.0685    0.2195    0.8966
Pt    0.0719    0.2244    0.9458
Pt    0.1209    0.0218    0.8998
Pt    0.1206    0.0208    0.9459
Pt    0.1187    0.0710    0.8984
Pt    0.1219    0.0725    0.9478
Pt    0.1203    0.1202    0.8977
Pt    0.1224    0.1231    0.9475
Pt    0.1233    0.1734    0.8976
Pt    0.1165    0.1722    0.9477
Pt    0.1245    0.2230    0.8967
Pt    0.1218    0.2204    0.9494
Pt    0.1695    0.0216    0.8985
Pt    0.1688    0.0208    0.9498
Pt    0.1694    0.0709    0.8934
Pt    0.1696    0.0708    0.9480
Pt    0.1730    0.1221    0.8975
Pt    0.1742    0.1238    0.9443
Pt    0.1705    0.1719    0.8983
Pt    0.1706    0.1715    0.9493
Pt    0.1695    0.2221    0.8975
Pt    0.1725    0.2151    0.9480
Pt    0.2219    0.0244    0.8979
Pt    0.2194    0.0220    0.9480
Pt    0.2209    0.0714    0.8976
Pt    0.2205    0.0726    0.9457
Pt    0.2424    0.1450    0.9015
Pt    0.0189    0.2465    0.9738
Pt    0.2448    0.0976    0.8989
Pt    0.0226    0.2447    0.9239
Pt    0.2453    0.0502    0.9463
Pt    0.2204    0.1963    0.8737
Pt    0.0442    0.2457    0.8973
Pt    0.9983    0.1928    0.9029
Pt    0.0948    0.1689    0.8756
Pt    0.1249    0.2449    0.9229
Pt    0.1731    0.1980    0.8736
Pt    0.0973    0.0002    0.8952
Pt    0.2223    0.2479    0.9725
Pt    0.2457    0.1218    0.8736
Pt    0.2445    0.0251    0.9211
Pt    0.2462    0.0255    0.9699
Pt    0.2467    0.0497    0.8974
Pt    0.2462    0.2482    0.9506
Pt    0.2474    0.2243    0.9239
Pt    0.2462    0.2001    0.9466
Pt    0.1486    0.2445    0.9484
Pt    0.2465    0.1245    0.9726
Pt    0.0986    0.2458    0.9478
Pt    0.2214    0.2470    0.8773
Pt    0.2435    0.0720    0.9220
Pt    0.2467    0.2478    0.8985
Pt    0.1950    0.2456    0.8942
Pt    0.0727    0.1446    0.8735
Pt    0.0223    0.2187    0.9953
Pt    0.0702    0.1254    0.9938
Pt    0.0469    0.1219    0.8738
Pt    0.0225    0.1469    0.8752
Pt    0.1714    0.0699    0.9957
Pt    0.9979    0.1750    0.8750
Pt    0.1176    0.0644    0.9946
Pt    0.2472    0.1480    0.9499
Pt    0.2437    0.1732    0.9737
Pt    0.1232    0.1700    0.9956
Pt    0.0419    0.0709    0.8733
Pt    0.1431    0.1958    0.9976
Pt    0.1957    0.2476    0.9475
Pt    0.2203    0.0242    0.9941
Pt    0.1985    0.0959    0.9965
Pt    0.0971    0.2223    0.8738
Pt    0.2463    0.1730    0.9202
Pt    0.0230    0.1972    0.8781
Pt    0.0444    0.1694    0.8736
Pt    0.0468    0.2477    0.9969
Pt    0.1197    0.2209    0.9970
Pt    0.1446    0.0438    0.9960
Pt    0.2445    0.1223    0.9268
Pt    0.2191    0.0727    0.9933
Pt    0.2186    0.2216    0.9949
Pt    0.0722    0.2462    0.8741
Pt    0.1460    0.2474    0.9978
Pt    0.1681    0.2202    0.9977
Pt    0.2437    0.2262    0.8729
Pt    0.1947    0.1725    0.8736
Pt    0.2215    0.0515    0.8737
Pt    0.2472    0.0751    0.8739
Pt    0.0951    0.0719    0.8729
Pt    0.2216    0.1500    0.8731
Pt    0.2195    0.4717    0.0982
Pt    0.2233    0.4699    0.0470
Pt    0.9984    0.3992    0.0493
Pt    0.2226    0.4223    0.1005
Pt    0.2233    0.4233    0.0522
Pt    0.0181    0.2518    0.0711
Pt    0.2203    0.3709    0.0980
Pt    0.2215    0.3732    0.0495
Pt    0.9983    0.4483    0.0476
Pt    0.1970    0.2510    0.0480
Pt    0.2219    0.3244    0.1010
Pt    0.2241    0.3214    0.0470
Pt    0.1456    0.3471    0.0001
Pt    0.0226    0.3213    0.9992
Pt    0.2250    0.2766    0.0986
Pt    0.9990    0.3988    0.1011
Pt    0.1215    0.3716    0.9988
Pt    0.1947    0.4953    0.0962
Pt    0.9979    0.3227    0.0223
Pt    0.0454    0.2973    0.0467
Pt    0.0455    0.2990    0.0974
Pt    0.1510    0.3935    0.9998
Pt    0.0478    0.3525    0.0452
Pt    0.0469    0.3479    0.0952
Pt    0.9979    0.2488    0.0989
Pt    0.0468    0.4022    0.0475
Pt    0.0506    0.3977    0.0968
Pt    0.1239    0.4775    0.0989
Pt    0.0470    0.4473    0.0477
Pt    0.0478    0.4463    0.0968
Pt    0.1732    0.4963    0.0220
Pt    0.9986    0.4745    0.0243
Pt    0.2032    0.2501    0.0994
Pt    0.1239    0.4721    0.0506
Pt    0.0968    0.2994    0.0474
Pt    0.0954    0.2955    0.0936
Pt    0.1238    0.4192    0.0981
Pt    0.1007    0.3465    0.0492
Pt    0.0979    0.3469    0.0977
Pt    0.1240    0.4213    0.0486
Pt    0.0984    0.3953    0.0499
Pt    0.0982    0.3971    0.0987
Pt    0.1242    0.3719    0.0991
Pt    0.0989    0.4473    0.0481
Pt    0.1008    0.4503    0.1009
Pt    0.1253    0.4954    0.0235
Pt    0.2289    0.2484    0.0770
Pt    0.1257    0.4173    0.9992
Pt    0.1209    0.2489    0.0715
Pt    0.1494    0.2965    0.0479
Pt    0.1515    0.2930    0.0945
Pt    0.1282    0.3684    0.0515
Pt    0.1478    0.3437    0.0488
Pt    0.1475    0.3446    0.1017
Pt    0.1244    0.3182    0.0995
Pt    0.1488    0.3955    0.0497
Pt    0.1493    0.3982    0.1008
Pt    0.1219    0.3206    0.0521
Pt    0.1484    0.4480    0.0493
Pt    0.1471    0.4458    0.0969
Pt    0.2471    0.3979    0.9995
Pt    0.1712    0.3216    0.9980
Pt    0.9990    0.3230    0.1223
Pt    0.1473    0.4446    0.9984
Pt    0.2009    0.2983    0.0490
Pt    0.1987    0.2957    0.0945
Pt    0.2452    0.3941    0.0502
Pt    0.1999    0.3477    0.0500
Pt    0.1936    0.3477    0.0976
Pt    0.1217    0.2723    0.0965
Pt    0.1993    0.3985    0.0475
Pt    0.1972    0.3954    0.0995
Pt    0.1198    0.2726    0.0468
Pt    0.1983    0.4463    0.0476
Pt    0.1974    0.4463    0.1028
Pt    0.2255    0.2732    0.0464
Pt    0.0738    0.2484    0.0233
Pt    0.1739    0.4694    0.0980
Pt    0.1710    0.4734    0.0479
Pt    0.0738    0.4729    0.0990
Pt    0.1732    0.4236    0.0977
Pt    0.1746    0.4223    0.0492
Pt    0.0724    0.4731    0.0460
Pt    0.1489    0.4982    0.0468
Pt    0.1715    0.3735    0.0997
Pt    0.0481    0.2703    0.0187
Pt    0.0473    0.2734    0.0736
Pt    0.0491    0.3216    0.0242
Pt    0.0454    0.3247    0.0704
Pt    0.0486    0.3757    0.0232
Pt    0.0486    0.3754    0.0714
Pt    0.0441    0.4210    0.0200
Pt    0.0485    0.4246    0.0714
Pt    0.0499    0.4766    0.0228
Pt    0.0475    0.4718    0.0716
Pt    0.0969    0.2741    0.0219
Pt    0.0965    0.2712    0.0710
Pt    0.0983    0.3227    0.0251
Pt    0.0961    0.3241    0.0710
Pt    0.0976    0.3701    0.0255
Pt    0.1018    0.3693    0.0725
Pt    0.0995    0.4208    0.0220
Pt    0.0996    0.4253    0.0727
Pt    0.0990    0.4712    0.0233
Pt    0.0990    0.4725    0.0751
Pt    0.1477    0.2716    0.0209
Pt    0.1474    0.2709    0.0708
Pt    0.1441    0.3228    0.0252
Pt    0.1521    0.3230    0.0776
Pt    0.1500    0.3735    0.0265
Pt    0.1492    0.3722    0.0739
Pt    0.1506    0.4192    0.0249
Pt    0.1483    0.4218    0.0734
Pt    0.1479    0.4708    0.0216
Pt    0.1485    0.4728    0.0731
Pt    0.1976    0.2727    0.0239
Pt    0.2002    0.2716    0.0723
Pt    0.1991    0.3201    0.0217
Pt    0.1989    0.3220    0.0772
Pt    0.1995    0.3667    0.0230
Pt    0.1984    0.3728    0.0720
Pt    0.2005    0.4213    0.0236
Pt    0.1979    0.4203    0.0749
Pt    0.1973    0.4724    0.0228
Pt    0.1975    0.4684    0.0730
Pt    0.2235    0.4952    0.0739
Pt    0.1737    0.3693    0.0479
Pt    0.0235    0.2985    0.0221
Pt    0.0200    0.2984    0.0721
Pt    0.0220    0.3465    0.0232
Pt    0.0207    0.3503    0.0702
Pt    0.0214    0.3991    0.0214
Pt    0.0242    0.3981    0.0766
Pt    0.0249    0.4495    0.0245
Pt    0.0226    0.4483    0.0735
Pt    0.0741    0.4231    0.0986
Pt    0.0260    0.4969    0.0731
Pt    0.0736    0.2997    0.0215
Pt    0.0702    0.2990    0.0718
Pt    0.0726    0.3487    0.0204
Pt    0.0680    0.3495    0.0706
Pt    0.0749    0.3992    0.0258
Pt    0.0717    0.4002    0.0718
Pt    0.0715    0.4436    0.0231
Pt    0.0760    0.4510    0.0713
Pt    0.1753    0.3190    0.1026
Pt    0.0493    0.4962    0.9989
Pt    0.1230    0.2958    0.0249
Pt    0.1228    0.2973    0.0734
Pt    0.1220    0.3480    0.0233
Pt    0.1257    0.3454    0.0766
Pt    0.1215    0.3931    0.0244
Pt    0.1237    0.3938    0.0735
Pt    0.1238    0.4455    0.0248
Pt    0.1239    0.4476    0.0772
Pt    0.1738    0.3222    0.0498
Pt    0.0751    0.4952    0.0228
Pt    0.1717    0.2963    0.0233
Pt    0.1752    0.2971    0.0724
Pt    0.1742    0.3442    0.0214
Pt    0.1737    0.3460    0.0728
Pt    0.1752    0.3931    0.0257
Pt    0.1715    0.3978    0.0726
Pt    0.1737    0.4436    0.0232
Pt    0.1732    0.4473    0.0718
Pt    0.1760    0.2719    0.0964
Pt    0.1729    0.2721    0.0497
Pt    0.2248    0.2969    0.0219
Pt    0.2264    0.2949    0.0716
Pt    0.2243    0.3450    0.0238
Pt    0.2219    0.3454    0.0745
Pt    0.2210    0.3960    0.0233
Pt    0.2233    0.3975    0.0745
Pt    0.2233    0.4466    0.0193
Pt    0.2229    0.4461    0.0750
Pt    0.0748    0.4227    0.0463
Pt    0.0217    0.2754    0.0441
Pt    0.0236    0.2744    0.0968
Pt    0.0755    0.3714    0.0992
Pt    0.0207    0.3233    0.0482
Pt    0.0206    0.3246    0.0948
Pt    0.0749    0.3743    0.0498
Pt    0.0227    0.3728    0.0481
Pt    0.0243    0.3726    0.0977
Pt    0.0713    0.3253    0.0956
Pt    0.0216    0.4240    0.0480
Pt    0.0221    0.4236    0.0977
Pt    0.0714    0.2991    0.1184
Pt    0.0237    0.4708    0.0482
Pt    0.0275    0.4741    0.0983
Pt    0.0724    0.3242    0.0473
Pt    0.0734    0.2744    0.0458
Pt    0.0709    0.2730    0.0951
Pt    0.1215    0.2739    0.9991
Pt    0.0741    0.4969    0.0743
Pt    0.0489    0.3714    0.1224
Pt    0.0470    0.4210    0.1210
Pt    0.2454    0.4466    0.1010
Pt    0.2230    0.4960    0.0228
Pt    0.2469    0.3946    0.1007
Pt    0.2450    0.4970    0.0971
Pt    0.0006    0.4979    0.0987
Pt    0.9981    0.4725    0.0766
Pt    0.1232    0.4973    0.0718
Pt    0.0718    0.2497    0.1211
Pt    0.1016    0.4959    0.0474
Pt    0.1743    0.4186    0.9998
Pt    0.0009    0.4976    0.0513
Pt    0.0988    0.3199    0.1205
Pt    0.1201    0.3438    0.1223
Pt    0.2472    0.3215    0.0765
Pt    0.0472    0.2729    0.1208
Pt    0.0219    0.2967    0.1219
Pt    0.9979    0.3506    0.1006
Pt    0.2468    0.3727    0.0729
Pt    0.9977    0.4468    0.0989
Pt    0.2464    0.3470    0.0492
Pt    0.1458    0.2970    0.9996
Pt    0.0969    0.2991    0.9982
Pt    0.0472    0.2494    0.0487
Pt    0.2239    0.3196    0.9998
Pt    0.1708    0.4935    0.1208
Pt    0.0236    0.3476    0.1224
Pt    0.0989    0.4462    0.9986
Pt    0.9992    0.3978    0.9990
Pt    0.1213    0.3965    0.1223
Pt    0.2249    0.3715    0.9994
Pt    0.1978    0.3928    0.9998
Pt    0.0237    0.3725    0.9981
Pt    0.0245    0.4486    0.1217
Pt    0.1223    0.3233    0.9994
Pt    0.0992    0.3697    0.1217
Pt    0.0471    0.3232    0.1209
Pt    0.0729    0.3451    0.1209
Pt    0.0985    0.2769    0.1229
Pt    0.2468    0.3704    0.1228
Pt    0.9978    0.2725    0.1223
Pt    0.1491    0.4947    1.0000
Pt    0.0473    0.2973    0.9981
Pt    0.1977    0.4976    0.9985
Pt    0.0009    0.4721    0.1737
Pt    0.1452    0.2735    0.1244
Pt    0.2292    0.4709    0.2002
Pt    0.2235    0.4712    0.1501
Pt    0.2257    0.4213    0.2023
Pt    0.2207    0.4212    0.1492
Pt    0.2208    0.3727    0.1515
Pt    0.1707    0.4679    0.1996
Pt    0.1713    0.4742    0.1491
Pt    0.1736    0.4214    0.2022
Pt    0.1704    0.2490    0.1239
Pt    0.1708    0.3974    0.1251
Pt    0.0505    0.3012    0.1465
Pt    0.0462    0.2968    0.2008
Pt    0.0460    0.3494    0.1469
Pt    0.0479    0.3485    0.1992
Pt    0.0493    0.3976    0.1474
Pt    0.0488    0.3974    0.1997
Pt    0.0487    0.4479    0.1525
Pt    0.0473    0.4480    0.1997
Pt    0.2474    0.4966    0.1455
Pt    0.0005    0.4255    0.2258
Pt    0.1006    0.2980    0.1510
Pt    0.0995    0.3034    0.2030
Pt    0.0968    0.3504    0.1537
Pt    0.0983    0.3502    0.1999
Pt    0.1001    0.3965    0.1480
Pt    0.0980    0.3942    0.2014
Pt    0.0975    0.4473    0.1483
Pt    0.0992    0.4483    0.1990
Pt    0.0025    0.4980    0.1498
Pt    0.1452    0.2949    0.1500
Pt    0.1492    0.2958    0.1971
Pt    0.1515    0.3491    0.1517
Pt    0.1496    0.3463    0.2026
Pt    0.1451    0.3946    0.1486
Pt    0.1473    0.3979    0.2005
Pt    0.1493    0.4475    0.1506
Pt    0.1475    0.4435    0.1987
Pt    0.1961    0.2969    0.1456
Pt    0.1960    0.3474    0.1511
Pt    0.1968    0.3968    0.1517
Pt    0.1988    0.3999    0.2023
Pt    0.1982    0.4497    0.1522
Pt    0.1989    0.4464    0.2027
Pt    0.1720    0.4246    0.1498
Pt    0.9978    0.4766    0.2249
Pt    0.1223    0.2971    0.1234
Pt    0.1736    0.3704    0.2020
Pt    0.1747    0.3737    0.1510
Pt    0.1738    0.3178    0.1943
Pt    0.1715    0.3223    0.1502
Pt    0.1492    0.4963    0.2010
Pt    0.1716    0.2711    0.1483
Pt    0.1235    0.4713    0.1984
Pt    0.1249    0.4703    0.1493
Pt    0.1207    0.4178    0.1994
Pt    0.1224    0.4226    0.1479
Pt    0.1259    0.3712    0.1993
Pt    0.1233    0.3660    0.1455
Pt    0.0504    0.2495    0.1986
Pt    0.0534    0.2714    0.1739
Pt    0.0476    0.2687    0.2248
Pt    0.1982    0.4963    0.2470
Pt    0.0480    0.3186    0.1742
Pt    0.0471    0.3244    0.2254
Pt    0.0528    0.4976    0.1486
Pt    0.0464    0.3719    0.1747
Pt    0.0476    0.3720    0.2222
Pt    0.9983    0.3979    0.2027
Pt    0.0486    0.4236    0.1763
Pt    0.0480    0.4232    0.2262
Pt    0.2227    0.4966    0.1247
Pt    0.0475    0.4727    0.1775
Pt    0.0472    0.4718    0.2256
Pt    0.1719    0.4966    0.1743
Pt    0.0990    0.2731    0.1747
Pt    0.1002    0.2796    0.2264
Pt    0.1977    0.3731    0.1249
Pt    0.0972    0.3262    0.1767
Pt    0.0992    0.3279    0.2244
Pt    0.0001    0.3000    0.1960
Pt    0.0975    0.3734    0.1760
Pt    0.1014    0.3723    0.2275
Pt    0.2195    0.3486    0.1243
Pt    0.0957    0.4211    0.1734
Pt    0.1010    0.4245    0.2228
Pt    0.9991    0.2949    0.1481
Pt    0.0964    0.4723    0.1737
Pt    0.0984    0.4726    0.2253
Pt    0.2232    0.3986    0.1242
Pt    0.1446    0.2710    0.1741
Pt    0.2009    0.4966    0.1536
Pt    0.1464    0.3197    0.1759
Pt    0.0268    0.4958    0.1233
Pt    0.1496    0.3701    0.1753
Pt    0.1515    0.3704    0.2295
Pt    0.1205    0.3274    0.1487
Pt    0.1461    0.4211    0.1736
Pt    0.1470    0.4209    0.2242
Pt    0.0756    0.4951    0.1259
Pt    0.1508    0.4710    0.1755
Pt    0.1488    0.4743    0.2277
Pt    0.1245    0.2740    0.2002
Pt    0.1695    0.2970    0.1261
Pt    0.0995    0.4942    0.2011
Pt    0.1217    0.2715    0.1463
Pt    0.0736    0.4708    0.1987
Pt    0.1946    0.3758    0.1777
Pt    0.0748    0.4711    0.1495
Pt    0.1973    0.4235    0.1734
Pt    0.2009    0.4225    0.2249
Pt    0.0010    0.4721    0.1259
Pt    0.2018    0.4703    0.1821
Pt    0.1979    0.4756    0.2210
Pt    0.0739    0.4217    0.2010
Pt    0.0008    0.4470    0.1502
Pt    0.1945    0.2726    0.1248
Pt    0.0735    0.4218    0.1489
Pt    0.0267    0.2929    0.1721
Pt    0.0201    0.3004    0.2236
Pt    0.0714    0.3733    0.1982
Pt    0.0237    0.3447    0.1697
Pt    0.0221    0.3479    0.2224
Pt    0.1006    0.4938    0.1503
Pt    0.0242    0.3992    0.1729
Pt    0.0246    0.3986    0.2254
Pt    0.2464    0.4211    0.1722
Pt    0.0217    0.4474    0.1767
Pt    0.0241    0.4498    0.2270
Pt    0.0695    0.3700    0.1497
Pt    0.9977    0.4512    0.2000
Pt    0.9978    0.2759    0.2254
Pt    0.0735    0.3232    0.2029
Pt    0.0749    0.2977    0.1757
Pt    0.0729    0.2982    0.2255
Pt    0.0757    0.3259    0.1490
Pt    0.0715    0.3461    0.1767
Pt    0.0729    0.3489    0.2242
Pt    0.0773    0.2750    0.2018
Pt    0.0730    0.3953    0.1722
Pt    0.0736    0.3998    0.2250
Pt    0.9987    0.2730    0.1760
Pt    0.0742    0.4492    0.1733
Pt    0.0735    0.4492    0.2236
Pt    0.0719    0.2765    0.1462
Pt    0.2206    0.4459    0.1769
Pt    0.0229    0.4738    0.2004
Pt    0.1185    0.2983    0.1763
Pt    0.0260    0.4725    0.1506
Pt    0.1239    0.3480    0.1767
Pt    0.1241    0.3492    0.2268
Pt    0.0248    0.4201    0.1995
Pt    0.1237    0.3978    0.1760
Pt    0.1232    0.3968    0.2266
Pt    0.0262    0.4260    0.1490
Pt    0.1219    0.4469    0.1751
Pt    0.1243    0.4494    0.2259
Pt    0.0221    0.3718    0.2007
Pt    0.0235    0.3728    0.1487
Pt    0.1768    0.2944    0.1721
Pt    0.0242    0.3223    0.1970
Pt    0.1776    0.3450    0.1773
Pt    0.0220    0.3200    0.1465
Pt    0.1710    0.3998    0.1761
Pt    0.1726    0.3943    0.2241
Pt    0.0461    0.2965    0.2450
Pt    0.1733    0.4462    0.1752
Pt    0.1736    0.4474    0.2266
Pt    0.1240    0.3237    0.2020
Pt    0.0240    0.2718    0.2015
Pt    0.0286    0.2731    0.1496
Pt    0.2227    0.3999    0.1753
Pt    0.2207    0.4494    0.2248
Pt    0.1460    0.3219    0.1277
Pt    0.2222    0.4745    0.2464
Pt    0.1032    0.4767    0.1241
Pt    0.2216    0.4466    0.1255
Pt    0.2477    0.4461    0.2008
Pt    0.1738    0.4487    0.1247
Pt    0.1475    0.4703    0.1230
Pt    0.1968    0.4206    0.1264
Pt    0.1495    0.4232    0.1243
Pt    0.0747    0.4971    0.2265
Pt    0.1980    0.4740    0.1266
Pt    0.1478    0.3728    0.1248
Pt    0.0247    0.2702    0.2460
Pt    0.0012    0.3729    0.2281
Pt    0.9986    0.3994    0.1484
Pt    0.9985    0.4232    0.1255
Pt    0.1240    0.4947    0.1729
Pt    0.9981    0.4243    0.1763
Pt    0.1256    0.4462    0.1246
Pt    0.0756    0.3955    0.1250
Pt    0.1972    0.3219    0.1247
Pt    0.0503    0.4715    0.1238
Pt    0.0744    0.4488    0.1237
Pt    0.0756    0.3218    0.2475
Pt    0.0969    0.4225    0.1232
Pt    0.1725    0.3472    0.1244
Pt    0.0231    0.3951    0.1231
Pt    0.0060    0.2753    0.3232
Pt    0.9980    0.3262    0.3248
Pt    0.1268    0.2484    0.3723
Pt    0.0987    0.4479    0.2489
Pt    0.9998    0.4750    0.2748
Pt    0.2444    0.4728    0.3239
Pt    0.9984    0.4539    0.2985
Pt    0.2185    0.4709    0.3506
Pt    0.2195    0.4744    0.3017
Pt    0.0023    0.3014    0.3485
Pt    0.0735    0.3711    0.2480
Pt    0.1700    0.4746    0.2530
Pt    0.2224    0.4239    0.3517
Pt    0.2225    0.4231    0.2995
Pt    0.0264    0.3729    0.2506
Pt    0.2471    0.4007    0.3526
Pt    0.0212    0.4227    0.2527
Pt    0.9994    0.4008    0.3028
Pt    0.0501    0.3011    0.3007
Pt    0.0519    0.3014    0.3465
Pt    0.9984    0.4251    0.3250
Pt    0.0492    0.3501    0.3007
Pt    0.0494    0.3485    0.3495
Pt    0.0007    0.2497    0.2963
Pt    0.0486    0.3990    0.3020
Pt    0.0728    0.4265    0.2487
Pt    0.0487    0.4507    0.2991
Pt    0.0750    0.2519    0.3216
Pt    0.0990    0.4002    0.2500
Pt    0.1476    0.4465    0.2498
Pt    0.0969    0.4016    0.2989
Pt    0.2254    0.4213    0.2481
Pt    0.0980    0.4490    0.3009
Pt    0.0967    0.4520    0.3491
Pt    0.1501    0.4976    0.3008
Pt    0.0985    0.3485    0.2530
Pt    0.1504    0.4479    0.2946
Pt    0.1499    0.4500    0.3484
Pt    0.0449    0.4481    0.2515
Pt    0.1976    0.3973    0.3461
Pt    0.2453    0.4492    0.3003
Pt    0.1987    0.4493    0.2974
Pt    0.1958    0.4468    0.3472
Pt    0.0738    0.2503    0.3717
Pt    0.9986    0.4023    0.3516
Pt    0.2447    0.3456    0.3457
Pt    0.0512    0.2743    0.3701
Pt    0.9979    0.3968    0.2495
Pt    0.2251    0.3751    0.3513
Pt    0.0988    0.2506    0.3492
Pt    0.0493    0.2489    0.3452
Pt    0.1757    0.4246    0.2982
Pt    0.1726    0.4742    0.3486
Pt    0.0495    0.2740    0.2718
Pt    0.0509    0.2753    0.3234
Pt    0.0513    0.3263    0.2784
Pt    0.0540    0.3244    0.3249
Pt    0.0472    0.3744    0.2753
Pt    0.0512    0.3727    0.3265
Pt    0.0526    0.4217    0.2728
Pt    0.0466    0.4263    0.3242
Pt    0.0517    0.4736    0.2777
Pt    0.0477    0.4750    0.3246
Pt    0.1010    0.3770    0.2763
Pt    0.0975    0.4244    0.2737
Pt    0.0990    0.4243    0.3261
Pt    0.1020    0.4748    0.2754
Pt    0.0977    0.4749    0.3251
Pt    0.1487    0.4204    0.2757
Pt    0.1487    0.4251    0.3230
Pt    0.1468    0.4750    0.2771
Pt    0.1490    0.4718    0.3238
Pt    0.2005    0.4207    0.2735
Pt    0.1955    0.4244    0.3226
Pt    0.2003    0.4709    0.2715
Pt    0.1975    0.4745    0.3239
Pt    0.0001    0.3759    0.3315
Pt    0.0228    0.3240    0.2502
Pt    0.0270    0.3022    0.2735
Pt    0.0286    0.3016    0.3239
Pt    0.0240    0.3479    0.2760
Pt    0.0272    0.3490    0.3245
Pt    0.0222    0.3974    0.2757
Pt    0.0250    0.3977    0.3271
Pt    0.0222    0.4484    0.2750
Pt    0.0219    0.4498    0.3237
Pt    0.9979    0.3732    0.2785
Pt    0.0733    0.3010    0.2740
Pt    0.0741    0.3495    0.2744
Pt    0.0757    0.3985    0.2703
Pt    0.0753    0.4502    0.2743
Pt    0.0738    0.4480    0.3254
Pt    0.1223    0.3996    0.2763
Pt    0.1236    0.4476    0.2735
Pt    0.1225    0.4480    0.3263
Pt    0.1750    0.4449    0.2704
Pt    0.1726    0.4501    0.3216
Pt    0.1746    0.4750    0.2983
Pt    0.2236    0.3981    0.3258
Pt    0.2214    0.4457    0.2721
Pt    0.2218    0.4486    0.3250
Pt    0.2470    0.3972    0.3014
Pt    0.0263    0.2749    0.2950
Pt    0.0270    0.2754    0.3492
Pt    0.1221    0.4245    0.3489
Pt    0.0243    0.3247    0.2979
Pt    0.0252    0.3252    0.3501
Pt    0.1985    0.4438    0.2495
Pt    0.0238    0.3729    0.3000
Pt    0.0246    0.3771    0.3547
Pt    0.1231    0.4517    0.3714
Pt    0.0266    0.4216    0.2989
Pt    0.1760    0.4209    0.2486
Pt    0.0232    0.4751    0.2995
Pt    0.9993    0.3007    0.2507
Pt    0.0764    0.2771    0.3451
Pt    0.0025    0.2508    0.3472
Pt    0.1242    0.4766    0.3481
Pt    0.0759    0.3758    0.2973
Pt    0.2455    0.4959    0.2990
Pt    0.0695    0.4231    0.3010
Pt    0.1500    0.3976    0.2492
Pt    0.0751    0.4772    0.3021
Pt    0.0706    0.4744    0.3499
Pt    0.1241    0.4687    0.3026
Pt    0.1713    0.4222    0.3486
Pt    0.1240    0.4222    0.2996
Pt    0.0502    0.3468    0.2516
Pt    0.0048    0.2993    0.3004
Pt    0.0736    0.4724    0.2488
Pt    0.0043    0.2738    0.2714
Pt    0.2450    0.4217    0.3241
Pt    0.0716    0.4982    0.3280
Pt    0.1224    0.4746    0.2493
Pt    0.0497    0.3972    0.2481
Pt    0.1229    0.3735    0.2535
Pt    0.9979    0.3480    0.2507
Pt    0.9988    0.3516    0.3034
Pt    0.0274    0.4752    0.2520
Pt    0.9985    0.3236    0.2756
Pt    0.0505    0.3279    0.3718
Pt    0.2428    0.4725    0.2744
Pt    0.9990    0.3520    0.3536
Pt    0.2461    0.4516    0.3481
Pt    0.1259    0.4226    0.2502
Pt    0.0981    0.2764    0.3685
Pt    0.0763    0.3030    0.3719
Pt    0.0014    0.2762    0.3728
Pt    0.2470    0.4482    0.2479
Pt    0.0732    0.2751    0.2480
Pt    0.2232    0.4727    0.4486
Pt    0.2197    0.4757    0.3996
Pt    0.0526    0.2543    0.4004
Pt    0.1467    0.4725    0.3741
Pt    0.2236    0.4232    0.4504
Pt    0.2232    0.3239    0.3974
Pt    0.1992    0.2513    0.4428
Pt    0.0504    0.3034    0.3974
Pt    0.0467    0.2994    0.4462
Pt    0.1237    0.2514    0.4693
Pt    0.2470    0.4714    0.4743
Pt    0.1024    0.3026    0.3956
Pt    0.0999    0.2973    0.4471
Pt    0.0963    0.3466    0.4484
Pt    0.2256    0.2507    0.4157
Pt    0.1740    0.4519    0.3745
Pt    0.1516    0.2997    0.4474
Pt    0.1493    0.3483    0.4479
Pt    0.1478    0.4040    0.3998
Pt    0.1459    0.3999    0.4454
Pt    0.1494    0.4460    0.3970
Pt    0.9996    0.2750    0.4227
Pt    0.0223    0.2512    0.4206
Pt    0.1975    0.2954    0.4473
Pt    0.1922    0.3448    0.3950
Pt    0.1983    0.3453    0.4473
Pt    0.1977    0.3972    0.4013
Pt    0.1928    0.3988    0.4470
Pt    0.1963    0.4509    0.3992
Pt    0.1942    0.4474    0.4490
Pt    0.2454    0.4004    0.4005
Pt    0.2185    0.4237    0.3986
Pt    0.2180    0.3747    0.4491
Pt    0.2206    0.3711    0.4012
Pt    0.2240    0.2732    0.4435
Pt    0.0955    0.4751    0.3753
Pt    0.2245    0.3221    0.4475
Pt    0.0699    0.2487    0.4674
Pt    0.0478    0.2758    0.4244
Pt    0.0471    0.2758    0.4701
Pt    0.1692    0.4713    0.4522
Pt    0.0520    0.3273    0.4223
Pt    0.0483    0.3265    0.4719
Pt    0.0219    0.3254    0.4972
Pt    0.1002    0.2755    0.4206
Pt    0.1001    0.2730    0.4736
Pt    0.0987    0.3213    0.4247
Pt    0.0961    0.3252    0.4733
Pt    0.0992    0.3733    0.4730
Pt    0.1698    0.3988    0.3771
Pt    0.1488    0.2767    0.4182
Pt    0.1470    0.2737    0.4717
Pt    0.1503    0.3255    0.4192
Pt    0.1458    0.3208    0.4716
Pt    0.1457    0.3704    0.4195
Pt    0.1463    0.3756    0.4715
Pt    0.2282    0.2500    0.4706
Pt    0.1452    0.4250    0.4722
Pt    0.9987    0.2514    0.4450
Pt    0.1462    0.4712    0.4281
Pt    0.1989    0.2742    0.4111
Pt    0.1989    0.2699    0.4714
Pt    0.1993    0.3217    0.4207
Pt    0.1964    0.3220    0.4718
Pt    0.2458    0.3720    0.4735
Pt    0.1961    0.3676    0.4209
Pt    0.1964    0.3733    0.4751
Pt    0.1466    0.2487    0.3980
Pt    0.1968    0.4240    0.4266
Pt    0.1962    0.4240    0.4720
Pt    0.2454    0.4980    0.3976
Pt    0.1963    0.4750    0.4259
Pt    0.1969    0.4730    0.4731
Pt    0.2448    0.2970    0.4456
Pt    0.1525    0.2519    0.4453
Pt    0.0265    0.3014    0.3749
Pt    0.1950    0.4009    0.4935
Pt    0.0246    0.3045    0.4196
Pt    0.0232    0.3016    0.4722
Pt    0.1241    0.2499    0.4231
Pt    0.0239    0.2509    0.3740
Pt    0.0984    0.2533    0.4467
Pt    0.1988    0.3725    0.3742
Pt    0.0984    0.2510    0.3945
Pt    0.0769    0.2996    0.4213
Pt    0.0729    0.2987    0.4716
Pt    0.0737    0.3510    0.4735
Pt    0.0024    0.3004    0.3997
Pt    0.2211    0.4977    0.4256
Pt    0.1732    0.4742    0.3994
Pt    0.1262    0.3014    0.4178
Pt    0.1195    0.3002    0.4758
Pt    0.1220    0.3443    0.4239
Pt    0.1216    0.3449    0.4680
Pt    0.1205    0.3993    0.4694
Pt    0.1462    0.4221    0.3736
Pt    0.0459    0.3506    0.4961
Pt    0.1758    0.2501    0.4191
Pt    0.1726    0.2992    0.4183
Pt    0.1756    0.2925    0.4711
Pt    0.1713    0.3474    0.4223
Pt    0.1732    0.3469    0.4708
Pt    0.2469    0.3483    0.3984
Pt    0.1721    0.3943    0.4209
Pt    0.1680    0.4019    0.4715
Pt    0.0749    0.3796    0.4953
Pt    0.1705    0.4496    0.4234
Pt    0.1678    0.4467    0.4735
Pt    0.9981    0.3520    0.3980
Pt    0.1701    0.4227    0.4448
Pt    0.2219    0.2969    0.4199
Pt    0.2222    0.2947    0.4694
Pt    0.1443    0.4534    0.4962
Pt    0.2226    0.3466    0.4240
Pt    0.2216    0.3477    0.4722
Pt    0.0213    0.2492    0.4717
Pt    0.2209    0.3985    0.4267
Pt    0.2259    0.3999    0.4764
Pt    0.1737    0.4225    0.3997
Pt    0.2187    0.4504    0.4246
Pt    0.2211    0.4481    0.4725
Pt    0.0271    0.2756    0.3989
Pt    0.0217    0.2769    0.4485
Pt    0.0253    0.3291    0.3960
Pt    0.0263    0.3277    0.4459
Pt    0.0748    0.2792    0.3960
Pt    0.0757    0.2750    0.4438
Pt    0.0766    0.3271    0.3980
Pt    0.0735    0.3236    0.4489
Pt    0.1236    0.2737    0.3956
Pt    0.1282    0.2762    0.4457
Pt    0.1259    0.3207    0.4451
Pt    0.1259    0.3701    0.4465
Pt    0.1250    0.4734    0.4011
Pt    0.1731    0.2735    0.4435
Pt    0.1741    0.3237    0.4449
Pt    0.1726    0.3698    0.3948
Pt    0.1716    0.3756    0.4477
Pt    0.2207    0.3985    0.3757
Pt    0.1980    0.3457    0.4961
Pt    0.0973    0.3521    0.4976
Pt    0.1980    0.4978    0.4498
Pt    0.1701    0.3758    0.4949
Pt    0.0018    0.3240    0.3738
Pt    0.1213    0.3790    0.4973
Pt    0.2459    0.4719    0.3745
Pt    0.2208    0.4469    0.3754
Pt    0.2438    0.4486    0.4034
Pt    0.1200    0.4939    0.4260
Pt    0.9992    0.3020    0.4450
Pt    0.0473    0.2505    0.4925
Pt    0.2203    0.3215    0.4956
Pt    0.0242    0.3527    0.3735
Pt    0.0722    0.2745    0.4939
Pt    0.0738    0.2484    0.4235
Pt    0.2464    0.3748    0.4221
Pt    0.2440    0.3492    0.4482
Pt    0.2464    0.4199    0.4250
Pt    0.0457    0.2521    0.4474
Pt    0.2007    0.2955    0.4950
Pt    0.1466    0.2993    0.4974
Pt    0.1725    0.4744    0.4969
Pt    0.2475    0.3957    0.4503
Pt    0.0484    0.3020    0.4972
Pt    0.1720    0.3212    0.4944
Pt    0.1980    0.4762    0.3754
Pt    0.0952    0.4037    0.4971
Pt    0.2468    0.4252    0.3766
Pt    0.2475    0.3001    0.4930
Pt    0.1711    0.2724    0.4946
Pt    0.2237    0.4759    0.4951
Pt    0.0202    0.2771    0.4932
Pt    0.1699    0.4249    0.4958
Pt    0.1971    0.4499    0.4968
Pt    0.2229    0.3734    0.4976
Pt    0.1473    0.3499    0.4973
Pt    0.1962    0.4250    0.3737
Pt    0.2234    0.3482    0.3732
Pt    0.0711    0.2509    0.5726
Pt    0.2436    0.4468    0.5471
Pt    0.1465    0.2500    0.5994
Pt    0.2469    0.4976    0.5002
Pt    0.2225    0.4737    0.5997
Pt    0.2208    0.4751    0.5453
Pt    0.0976    0.2505    0.5499
Pt    0.0944    0.4258    0.6192
Pt    0.1218    0.2500    0.5759
Pt    0.0972    0.2506    0.5972
Pt    0.2435    0.4504    0.4999
Pt    0.0148    0.4492    0.6117
Pt    0.1240    0.2484    0.5255
Pt    0.0455    0.2967    0.5465
Pt    0.0460    0.3033    0.5961
Pt    0.0213    0.2507    0.5745
Pt    0.0461    0.3484    0.5481
Pt    0.0437    0.3529    0.5984
Pt    0.0438    0.3977    0.5499
Pt    0.0429    0.4029    0.5921
Pt    0.2468    0.3225    0.5239
Pt    0.0438    0.4522    0.5911
Pt    0.0684    0.2493    0.5239
Pt    0.2470    0.3224    0.5780
Pt    0.0208    0.3020    0.6217
Pt    0.2193    0.4241    0.5479
Pt    0.0953    0.2991    0.5494
Pt    0.0973    0.2980    0.5977
Pt    0.0223    0.2532    0.5199
Pt    0.0926    0.3505    0.5445
Pt    0.0951    0.3517    0.5982
Pt    0.9983    0.3502    0.6014
Pt    0.0959    0.4011    0.5487
Pt    0.0956    0.4022    0.5959
Pt    0.0980    0.4495    0.5470
Pt    0.0985    0.4527    0.5893
Pt    0.2220    0.3723    0.5961
Pt    0.2474    0.3980    0.5498
Pt    0.1727    0.3239    0.5464
Pt    0.2463    0.2984    0.5990
Pt    0.1481    0.3018    0.5461
Pt    0.1462    0.3003    0.5974
Pt    0.1982    0.2498    0.5976
Pt    0.1447    0.3484    0.5414
Pt    0.1459    0.3492    0.5955
Pt    0.2451    0.3002    0.5488
Pt    0.1479    0.4021    0.5451
Pt    0.1465    0.3989    0.5983
Pt    0.1202    0.2981    0.6227
Pt    0.1483    0.4514    0.5474
Pt    0.1441    0.4528    0.5963
Pt    0.2206    0.3708    0.5482
Pt    0.1710    0.4002    0.6209
Pt    0.1452    0.4761    0.6191
Pt    0.2211    0.3235    0.6006
Pt    0.1983    0.3010    0.5458
Pt    0.1944    0.3004    0.5984
Pt    0.2206    0.3262    0.5458
Pt    0.1948    0.3500    0.5438
Pt    0.1945    0.3489    0.5986
Pt    0.2228    0.2751    0.6024
Pt    0.1976    0.3969    0.5443
Pt    0.1960    0.3990    0.5937
Pt    0.2218    0.2748    0.5472
Pt    0.1959    0.4520    0.5511
Pt    0.1966    0.4485    0.5931
Pt    0.1967    0.2535    0.5480
Pt    0.1718    0.4743    0.5917
Pt    0.1209    0.4248    0.4990
Pt    0.2230    0.4257    0.5946
Pt    0.0468    0.2494    0.5959
Pt    0.1715    0.2751    0.5470
Pt    0.0469    0.2749    0.5170
Pt    0.0484    0.2737    0.5731
Pt    0.0471    0.3240    0.5272
Pt    0.0463    0.3259    0.5721
Pt    0.0404    0.3757    0.5209
Pt    0.0413    0.3759    0.5734
Pt    0.0430    0.4277    0.5670
Pt    0.1211    0.3241    0.4995
Pt    0.0988    0.2763    0.5253
Pt    0.0973    0.2766    0.5732
Pt    0.0958    0.3257    0.5208
Pt    0.0944    0.3241    0.5720
Pt    0.0945    0.3772    0.5211
Pt    0.0928    0.3768    0.5738
Pt    0.0974    0.4238    0.5252
Pt    0.0952    0.4280    0.5726
Pt    0.0998    0.4802    0.5673
Pt    0.1480    0.2735    0.5252
Pt    0.1475    0.2792    0.5716
Pt    0.1502    0.3244    0.5212
Pt    0.1445    0.3254    0.5713
Pt    0.1466    0.3754    0.5218
Pt    0.1431    0.3706    0.5694
Pt    0.1464    0.4299    0.5216
Pt    0.1450    0.4253    0.5725
Pt    0.1488    0.4732    0.5202
Pt    0.1464    0.4795    0.5685
Pt    0.1946    0.2731    0.5221
Pt    0.1965    0.2755    0.5736
Pt    0.1957    0.3238    0.5206
Pt    0.1984    0.3277    0.5706
Pt    0.1967    0.3747    0.5206
Pt    0.1918    0.3725    0.5726
Pt    0.1995    0.4230    0.5211
Pt    0.1943    0.4236    0.5701
Pt    0.1984    0.4796    0.5198
Pt    0.1978    0.4766    0.5730
Pt    0.2226    0.4233    0.5012
Pt    0.1693    0.3497    0.6202
Pt    0.0205    0.2996    0.5207
Pt    0.0229    0.3009    0.5678
Pt    0.0213    0.3504    0.5223
Pt    0.0198    0.3478    0.5744
Pt    0.0152    0.3989    0.5711
Pt    0.1711    0.3734    0.5466
Pt    0.1485    0.4264    0.6197
Pt    0.2440    0.2728    0.5755
Pt    0.0712    0.2997    0.5231
Pt    0.0713    0.2967    0.5699
Pt    0.0684    0.3526    0.5219
Pt    0.0688    0.3528    0.5737
Pt    0.0668    0.3979    0.5251
Pt    0.0692    0.4008    0.5696
Pt    0.0706    0.4573    0.5710
Pt    0.0459    0.2500    0.5468
Pt    0.1227    0.4769    0.5949
Pt    0.1237    0.2996    0.5205
Pt    0.1218    0.3013    0.5734
Pt    0.1219    0.3547    0.5190
Pt    0.1157    0.3505    0.5722
Pt    0.1229    0.3984    0.5242
Pt    0.1220    0.3984    0.5722
Pt    0.1213    0.4508    0.5215
Pt    0.1243    0.4526    0.5699
Pt    0.2475    0.3446    0.5512
Pt    0.1711    0.2754    0.5965
Pt    0.1712    0.2961    0.5177
Pt    0.1731    0.2988    0.5695
Pt    0.1731    0.3492    0.5182
Pt    0.1694    0.3474    0.5691
Pt    0.1730    0.3984    0.5214
Pt    0.1717    0.3978    0.5717
Pt    0.1738    0.4497    0.5241
Pt    0.1673    0.4483    0.5730
Pt    0.0983    0.3239    0.6213
Pt    0.2460    0.3509    0.5974
Pt    0.2215    0.3022    0.5239
Pt    0.2183    0.3009    0.5747
Pt    0.2201    0.3509    0.5212
Pt    0.2219    0.3485    0.5746
Pt    0.2258    0.3997    0.5250
Pt    0.2206    0.3983    0.5692
Pt    0.2196    0.4490    0.5243
Pt    0.2210    0.4500    0.5709
Pt    0.1706    0.4784    0.5474
Pt    0.0224    0.2739    0.5470
Pt    0.0224    0.2780    0.5968
Pt    0.1718    0.4236    0.5938
Pt    0.0204    0.3255    0.5464
Pt    0.0196    0.3239    0.5976
Pt    0.0157    0.3741    0.5496
Pt    0.0193    0.3755    0.5997
Pt    0.0169    0.4248    0.5911
Pt    0.1722    0.4217    0.5459
Pt    0.1687    0.3245    0.5962
Pt    0.1229    0.4756    0.5445
Pt    0.0702    0.2731    0.5443
Pt    0.0723    0.2731    0.5971
Pt    0.1215    0.4256    0.5941
Pt    0.0719    0.3259    0.5494
Pt    0.0734    0.3268    0.5955
Pt    0.0457    0.3812    0.6215
Pt    0.0689    0.3745    0.5481
Pt    0.0679    0.3784    0.5958
Pt    0.0704    0.4244    0.5463
Pt    0.0692    0.4270    0.5957
Pt    0.0763    0.4771    0.5954
Pt    0.1703    0.3741    0.5965
Pt    0.1231    0.2750    0.5483
Pt    0.1221    0.2761    0.5981
Pt    0.2442    0.2777    0.5233
Pt    0.1199    0.3245    0.5463
Pt    0.1206    0.3278    0.5969
Pt    0.1206    0.4224    0.5478
Pt    0.1180    0.3736    0.5470
Pt    0.1215    0.3765    0.5958
Pt    0.0216    0.4789    0.5921
Pt    0.0714    0.3247    0.4998
Pt    0.1210    0.4007    0.6199
Pt    0.2462    0.4215    0.5725
Pt    0.2476    0.3265    0.6204
Pt    0.1210    0.2717    0.4981
Pt    0.2452    0.3464    0.5022
Pt    0.0707    0.4518    0.6173
Pt    0.1218    0.4489    0.6205
Pt    0.0410    0.4274    0.6178
Pt    0.0484    0.3250    0.6227
Pt    0.1454    0.2494    0.4990
Pt    0.2194    0.4483    0.6188
Pt    0.1722    0.4502    0.6207
Pt    0.1715    0.4983    0.6193
Pt    0.2466    0.4970    0.5997
Pt    0.1445    0.3237    0.6204
Pt    0.1975    0.4717    0.6205
Pt    0.0959    0.2980    0.4980
Pt    0.0477    0.2765    0.6219
Pt    0.2461    0.3715    0.5720
Pt    0.0246    0.2518    0.6207
Pt    0.0697    0.3538    0.6210
Pt    0.2216    0.2492    0.5736
Pt    0.0953    0.3776    0.6202
Pt    0.0970    0.4723    0.6212
Pt    0.0446    0.4766    0.6170
Pt    0.2196    0.3943    0.6216
Pt    0.1228    0.3528    0.6217
Pt    0.2448    0.4715    0.5707
Pt    0.0720    0.4014    0.6219
Pt    0.1975    0.4215    0.6182
Pt    0.2428    0.3985    0.5961
Pt    0.0735    0.3003    0.6182
Pt    0.9999    0.2748    0.6226
Pt    0.2213    0.3491    0.6228
Pt    0.2180    0.4974    0.6229
Pt    0.1929    0.2751    0.6225
Pt    0.0201    0.4027    0.6204
Pt    0.1451    0.4008    0.4986
Pt    0.9979    0.2515    0.4981
Pt    0.2235    0.2737    0.4983
Pt    0.2243    0.4744    0.6974
Pt    0.2218    0.4728    0.6474
Pt    0.2182    0.2983    0.6261
Pt    0.2201    0.4267    0.6943
Pt    0.2424    0.2516    0.7448
Pt    0.1967    0.2484    0.6493
Pt    0.9991    0.2994    0.6475
Pt    0.2213    0.4241    0.6456
Pt    0.1950    0.3244    0.6236
Pt    0.2235    0.3742    0.6993
Pt    0.2175    0.2513    0.7237
Pt    0.9980    0.4979    0.6436
Pt    0.0514    0.3006    0.6477
Pt    0.0439    0.3006    0.6973
Pt    0.0473    0.3529    0.6481
Pt    0.0466    0.3473    0.6948
Pt    0.0475    0.3987    0.6499
Pt    0.0435    0.4004    0.6956
Pt    0.0471    0.4491    0.6436
Pt    0.0475    0.4463    0.6919
Pt    0.2477    0.3255    0.7238
Pt    0.2459    0.4258    0.6709
Pt    0.0942    0.3005    0.6473
Pt    0.0966    0.2989    0.6983
Pt    0.0995    0.3521    0.6433
Pt    0.0923    0.3499    0.7025
Pt    0.0952    0.3994    0.6457
Pt    0.0927    0.3985    0.6999
Pt    0.0969    0.4477    0.6439
Pt    0.0926    0.4507    0.6936
Pt    0.1691    0.4261    0.6477
Pt    0.1711    0.3771    0.6947
Pt    0.1475    0.2973    0.6468
Pt    0.1431    0.2955    0.6982
Pt    0.1455    0.3516    0.6471
Pt    0.1456    0.3487    0.6948
Pt    0.1469    0.3992    0.6453
Pt    0.1450    0.3976    0.6973
Pt    0.1422    0.4468    0.6440
Pt    0.1435    0.4502    0.6968
Pt    0.1703    0.3757    0.6463
Pt    0.1684    0.3237    0.6979
Pt    0.1936    0.2975    0.6490
Pt    0.1959    0.2980    0.6973
Pt    0.1948    0.3499    0.6478
Pt    0.1952    0.3510    0.6923
Pt    0.1968    0.4018    0.6480
Pt    0.1983    0.3981    0.6945
Pt    0.1953    0.4478    0.6449
Pt    0.1953    0.4522    0.6951
Pt    0.2212    0.3729    0.6476
Pt    0.2192    0.3262    0.6973
Pt    0.2180    0.3251    0.6485
Pt    0.2447    0.3747    0.6720
Pt    0.9986    0.4732    0.6655
Pt    0.2217    0.2720    0.6956
Pt    0.2475    0.3982    0.7463
Pt    0.0486    0.2492    0.6984
Pt    0.2197    0.2730    0.6483
Pt    0.1458    0.2731    0.6247
Pt    0.9981    0.3257    0.6272
Pt    0.1705    0.4750    0.6947
Pt    0.1655    0.4707    0.6453
Pt    0.1676    0.4243    0.6938
Pt    0.1960    0.3722    0.6247
Pt    0.0455    0.2719    0.6751
Pt    0.0460    0.2707    0.7235
Pt    0.2442    0.2966    0.6968
Pt    0.0507    0.3254    0.6737
Pt    0.0439    0.3269    0.7239
Pt    0.0219    0.4952    0.7150
Pt    0.0471    0.3741    0.6715
Pt    0.0469    0.3753    0.7231
Pt    0.2458    0.4475    0.6957
Pt    0.0441    0.4218    0.6702
Pt    0.0434    0.4232    0.7187
Pt    0.2453    0.3494    0.6991
Pt    0.0461    0.4718    0.6684
Pt    0.0438    0.4708    0.7200
Pt    0.2189    0.4966    0.7213
Pt    0.0967    0.2745    0.6723
Pt    0.0965    0.2723    0.7263
Pt    0.1454    0.4981    0.7448
Pt    0.0931    0.3218    0.6731
Pt    0.0943    0.3236    0.7249
Pt    0.2435    0.3979    0.6448
Pt    0.0973    0.3742    0.6767
Pt    0.0944    0.3740    0.7249
Pt    0.2475    0.2749    0.6715
Pt    0.0947    0.4256    0.6731
Pt    0.0969    0.4239    0.7218
Pt    0.2186    0.2496    0.6236
Pt    0.0972    0.4763    0.6697
Pt    0.0952    0.4734    0.7218
Pt    0.1223    0.2702    0.7474
Pt    0.1476    0.2734    0.6731
Pt    0.1458    0.2704    0.7205
Pt    0.0247    0.3520    0.6271
Pt    0.1434    0.3202    0.6732
Pt    0.1425    0.3213    0.7190
Pt    0.0730    0.2499    0.6738
Pt    0.1449    0.3746    0.6711
Pt    0.1460    0.3751    0.7210
Pt    0.1201    0.2722    0.6471
Pt    0.1431    0.4240    0.6702
Pt    0.1465    0.4229    0.7215
Pt    0.0206    0.2492    0.7195
Pt    0.1423    0.4742    0.6678
Pt    0.1465    0.4736    0.7206
Pt    0.0706    0.4751    0.6945
Pt    0.1943    0.2740    0.6748
Pt    0.1949    0.2756    0.7207
Pt    0.0696    0.4725    0.6420
Pt    0.1908    0.3241    0.6739
Pt    0.1950    0.3243    0.7204
Pt    0.1455    0.2986    0.7461
Pt    0.1949    0.3767    0.6713
Pt    0.1958    0.3762    0.7192
Pt    0.1463    0.3986    0.7461
Pt    0.1940    0.4274    0.6719
Pt    0.1978    0.4247    0.7255
Pt    0.0700    0.4221    0.6977
Pt    0.1937    0.4730    0.6689
Pt    0.1947    0.4729    0.7210
Pt    0.0701    0.4247    0.6476
Pt    0.2461    0.3212    0.6723
Pt    0.2458    0.2735    0.6252
Pt    0.0697    0.3735    0.6978
Pt    0.0212    0.3023    0.6730
Pt    0.0199    0.2963    0.7228
Pt    0.2454    0.4249    0.6234
Pt    0.0188    0.3460    0.6726
Pt    0.0219    0.3500    0.7245
Pt    0.0163    0.4264    0.6456
Pt    0.0184    0.4000    0.6725
Pt    0.0189    0.3987    0.7178
Pt    0.0236    0.3240    0.6456
Pt    0.0214    0.4460    0.6676
Pt    0.0170    0.4499    0.7217
Pt    0.1705    0.3219    0.6461
Pt    0.1707    0.2682    0.6981
Pt    0.1727    0.2721    0.6477
Pt    0.0222    0.3734    0.6975
Pt    0.0704    0.2978    0.6757
Pt    0.0730    0.2979    0.7258
Pt    0.0219    0.2723    0.6988
Pt    0.0717    0.3518    0.6720
Pt    0.0682    0.3488    0.7252
Pt    0.0231    0.4737    0.6412
Pt    0.0715    0.3985    0.6725
Pt    0.0698    0.3989    0.7262
Pt    0.9991    0.4954    0.6906
Pt    0.0688    0.4489    0.6692
Pt    0.0708    0.4471    0.7212
Pt    0.1224    0.4779    0.6938
Pt    0.1205    0.4741    0.6415
Pt    0.1194    0.4224    0.6955
Pt    0.0184    0.3743    0.6514
Pt    0.1190    0.2972    0.6713
Pt    0.1198    0.2976    0.7261
Pt    0.0201    0.3256    0.6997
Pt    0.1191    0.3465    0.6705
Pt    0.1203    0.3503    0.7219
Pt    0.0443    0.4949    0.6926
Pt    0.1199    0.3986    0.6722
Pt    0.1220    0.4002    0.7216
Pt    0.0726    0.3750    0.6482
Pt    0.1202    0.4500    0.6719
Pt    0.1177    0.4495    0.7175
Pt    0.1189    0.4240    0.6471
Pt    0.1196    0.3727    0.6985
Pt    0.1197    0.3747    0.6479
Pt    0.0718    0.3224    0.7021
Pt    0.1708    0.2983    0.6757
Pt    0.1702    0.2970    0.7227
Pt    0.2452    0.4251    0.7220
Pt    0.1676    0.3500    0.6722
Pt    0.1709    0.3510    0.7209
Pt    0.1936    0.4957    0.6445
Pt    0.1697    0.4001    0.6697
Pt    0.1730    0.4030    0.7186
Pt    0.0715    0.3284    0.6462
Pt    0.1655    0.4508    0.6717
Pt    0.1697    0.4499    0.7206
Pt    0.1197    0.3233    0.6941
Pt    0.1211    0.3248    0.6470
Pt    0.1186    0.2700    0.6972
Pt    0.0700    0.2760    0.7007
Pt    0.2203    0.3010    0.6713
Pt    0.2221    0.3013    0.7229
Pt    0.0720    0.2764    0.6445
Pt    0.2217    0.3500    0.6733
Pt    0.2194    0.3483    0.7225
Pt    0.0202    0.4255    0.6955
Pt    0.2196    0.4001    0.6718
Pt    0.2225    0.3998    0.7207
Pt    0.0222    0.4718    0.6914
Pt    0.2219    0.4510    0.6709
Pt    0.2201    0.4492    0.7207
Pt    0.0252    0.2785    0.6477
Pt    0.0969    0.4972    0.6447
Pt    0.1706    0.3244    0.7463
Pt    0.2173    0.4960    0.6711
Pt    0.1727    0.3752    0.7444
Pt    0.2457    0.2993    0.6469
Pt    0.0956    0.3999    0.7449
Pt    0.2472    0.4042    0.6968
Pt    0.0191    0.4693    0.7464
Pt    0.2437    0.3458    0.6506
Pt    0.2450    0.3712    0.7245
Pt    0.1189    0.3231    0.7474
Pt    0.0453    0.4470    0.7478
Pt    0.1219    0.4723    0.7449
Pt    0.0178    0.4234    0.7477
Pt    0.0458    0.2506    0.6477
Pt    0.2466    0.4736    0.7268
Pt    0.2472    0.4772    0.6733
Pt    0.1710    0.4980    0.7214
Pt    0.0956    0.2716    0.6230
Pt    0.2190    0.3236    0.7472
Pt    0.1682    0.2710    0.7454
Pt    0.0467    0.2971    0.7478
Pt    0.1940    0.2971    0.7473
Pt    0.1183    0.4250    0.7447
Pt    0.1436    0.4477    0.7453
Pt    0.1436    0.3475    0.7439
Pt    0.1711    0.4733    0.7465
Pt    0.1450    0.3762    0.6240
Pt    0.2462    0.2993    0.7473
Pt    0.0687    0.4734    0.7451
Pt    0.0717    0.4973    0.7209
Pt    0.1967    0.3981    0.7447
Pt    0.0440    0.4001    0.7456
Pt    0.0479    0.4983    0.7455
Pt    0.2415    0.3484    0.7476
Pt    0.0972    0.4973    0.7453
Pt    0.1954    0.3482    0.7469
Pt    0.0175    0.3252    0.7466
Pt    0.1724    0.2486    0.6234
Pt    0.1676    0.2998    0.6234
Pt    0.2247    0.4699    0.8482
Pt    0.2207    0.4717    0.7969
Pt    0.2445    0.4974    0.8466
Pt    0.2221    0.4244    0.8473
Pt    0.2205    0.4217    0.7962
Pt    0.2443    0.3756    0.8714
Pt    0.2214    0.3725    0.8481
Pt    0.2217    0.3746    0.7976
Pt    0.1695    0.3190    0.8502
Pt    0.1707    0.3731    0.7946
Pt    0.1691    0.3216    0.7968
Pt    0.0723    0.4250    0.8454
Pt    0.2208    0.3214    0.8484
Pt    0.9978    0.2706    0.8711
Pt    0.0718    0.4223    0.7949
Pt    0.2453    0.2733    0.7718
Pt    0.0202    0.2720    0.7484
Pt    0.2200    0.4261    0.7494
Pt    0.1717    0.3726    0.8484
Pt    0.0438    0.3000    0.7952
Pt    0.0494    0.2969    0.8462
Pt    0.1243    0.4964    0.8231
Pt    0.0449    0.3472    0.7975
Pt    0.0437    0.3478    0.8490
Pt    0.1218    0.4979    0.7723
Pt    0.0453    0.3990    0.7983
Pt    0.0458    0.3985    0.8449
Pt    0.2452    0.3472    0.8468
Pt    0.0455    0.4501    0.7978
Pt    0.0483    0.4488    0.8456
Pt    0.1954    0.4496    0.7479
Pt    0.2448    0.3750    0.8220
Pt    0.0713    0.4975    0.7698
Pt    0.2460    0.3508    0.8000
Pt    0.0994    0.2991    0.7982
Pt    0.0969    0.2967    0.8458
Pt    0.2448    0.2992    0.8475
Pt    0.0973    0.3470    0.7995
Pt    0.0981    0.3458    0.8473
Pt    0.0955    0.4491    0.7495
Pt    0.0947    0.3970    0.7983
Pt    0.0961    0.3983    0.8473
Pt    0.2191    0.3708    0.7479
Pt    0.0964    0.4465    0.7979
Pt    0.0963    0.4502    0.8505
Pt    0.0208    0.3740    0.7481
Pt    0.1681    0.3485    0.7688
Pt    0.1994    0.4965    0.8507
Pt    0.0692    0.3735    0.8485
Pt    0.1463    0.2974    0.7949
Pt    0.1449    0.2971    0.8476
Pt    0.1696    0.2962    0.8244
Pt    0.1471    0.3485    0.7983
Pt    0.1492    0.3469    0.8448
Pt    0.0730    0.3708    0.7991
Pt    0.1455    0.3993    0.7945
Pt    0.1487    0.3973    0.8512
Pt    0.0460    0.4968    0.8462
Pt    0.1430    0.4480    0.7930
Pt    0.1479    0.4495    0.8449
Pt    0.2184    0.3491    0.8227
Pt    0.9990    0.3227    0.8236
Pt    0.2207    0.3469    0.7735
Pt    0.2467    0.3250    0.8228
Pt    0.1935    0.3011    0.8001
Pt    0.1948    0.2970    0.8492
Pt    0.2462    0.4964    0.7979
Pt    0.1938    0.3486    0.7959
Pt    0.1948    0.3451    0.8488
Pt    0.2215    0.3981    0.7688
Pt    0.1935    0.3985    0.7989
Pt    0.1943    0.3961    0.8490
Pt    0.1701    0.2979    0.7673
Pt    0.1971    0.4441    0.7997
Pt    0.1994    0.4488    0.8480
Pt    0.2191    0.3229    0.8001
Pt    0.2223    0.2993    0.8225
Pt    0.2191    0.2723    0.8477
Pt    0.2220    0.2745    0.7963
Pt    0.1222    0.3977    0.8232
Pt    0.1214    0.3204    0.8492
Pt    0.1732    0.4720    0.8477
Pt    0.1707    0.2696    0.8466
Pt    0.1731    0.3528    0.8209
Pt    0.1751    0.4767    0.7986
Pt    0.1218    0.2714    0.8479
Pt    0.1221    0.3740    0.8464
Pt    0.2223    0.3005    0.7732
Pt    0.1713    0.2724    0.7993
Pt    0.1234    0.4220    0.8474
Pt    0.0444    0.2725    0.7734
Pt    0.0464    0.2696    0.8206
Pt    0.0709    0.3260    0.8492
Pt    0.0460    0.3236    0.7706
Pt    0.0474    0.3217    0.8235
Pt    0.1522    0.4948    0.8495
Pt    0.0468    0.3733    0.7729
Pt    0.0438    0.3730    0.8234
Pt    0.0183    0.4721    0.8468
Pt    0.0461    0.4213    0.7725
Pt    0.0482    0.4218    0.8230
Pt    0.0730    0.4738    0.7960
Pt    0.0461    0.4731    0.7705
Pt    0.0494    0.4755    0.8208
Pt    0.2183    0.4716    0.7481
Pt    0.0953    0.2703    0.7719
Pt    0.0998    0.2707    0.8170
Pt    0.9978    0.4741    0.7725
Pt    0.0959    0.3240    0.7756
Pt    0.0966    0.3214    0.8247
Pt    0.0215    0.4750    0.7966
Pt    0.0990    0.3720    0.7740
Pt    0.0955    0.3722    0.8257
Pt    0.1251    0.4722    0.8457
Pt    0.0943    0.4224    0.7706
Pt    0.0998    0.4228    0.8238
Pt    0.1240    0.3231    0.7975
Pt    0.0966    0.4751    0.7708
Pt    0.0952    0.4712    0.8207
Pt    0.1708    0.4470    0.8186
Pt    0.1475    0.2736    0.7707
Pt    0.1459    0.2670    0.8226
Pt    0.0214    0.4227    0.8460
Pt    0.1445    0.3222    0.7693
Pt    0.1462    0.3208    0.8215
Pt    0.1710    0.4481    0.7754
Pt    0.1423    0.3705    0.7733
Pt    0.1474    0.3747    0.8199
Pt    0.2202    0.3989    0.8201
Pt    0.1427    0.4243    0.7701
Pt    0.1443    0.4238    0.8206
Pt    0.1726    0.4003    0.8261
Pt    0.1492    0.4737    0.7706
Pt    0.1516    0.4722    0.8204
Pt    0.0228    0.4245    0.7991
Pt    0.1951    0.2756    0.7761
Pt    0.1966    0.2737    0.8218
Pt    0.1731    0.4205    0.7970
Pt    0.1937    0.3235    0.7738
Pt    0.1916    0.3271    0.8231
Pt    0.0211    0.3727    0.8485
Pt    0.1960    0.3720    0.7716
Pt    0.1977    0.3750    0.8218
Pt    0.1264    0.2702    0.7979
Pt    0.1951    0.4220    0.7711
Pt    0.1974    0.4236    0.8250
Pt    0.0209    0.3705    0.7971
Pt    0.1948    0.4737    0.7734
Pt    0.1992    0.4699    0.8226
Pt    0.0696    0.3220    0.7982
Pt    0.1193    0.4197    0.7971
Pt    0.2179    0.2752    0.7479
Pt    0.0197    0.3232    0.8487
Pt    0.0214    0.2983    0.7691
Pt    0.0216    0.2982    0.8242
Pt    0.0207    0.3226    0.7979
Pt    0.0187    0.3473    0.7745
Pt    0.0198    0.3476    0.8224
Pt    0.0230    0.2735    0.8480
Pt    0.0203    0.3967    0.7736
Pt    0.0165    0.3984    0.8188
Pt    0.0706    0.2726    0.8459
Pt    0.0209    0.4477    0.7728
Pt    0.0201    0.4499    0.8227
Pt    0.1218    0.4481    0.8201
Pt    0.0709    0.4726    0.8478
Pt    0.1192    0.3995    0.7688
Pt    0.1182    0.4500    0.7713
Pt    0.0697    0.2982    0.7739
Pt    0.0734    0.2952    0.8209
Pt    0.2435    0.2734    0.8258
Pt    0.0716    0.3470    0.7743
Pt    0.0742    0.3476    0.8228
Pt    0.1198    0.3720    0.7985
Pt    0.0721    0.3952    0.7695
Pt    0.0698    0.3966    0.8204
Pt    0.1707    0.3970    0.7711
Pt    0.0699    0.4475    0.7730
Pt    0.0714    0.4480    0.8237
Pt    0.0220    0.2732    0.7998
Pt    0.1705    0.4278    0.8461
Pt    0.2220    0.4475    0.8221
Pt    0.2193    0.4489    0.7752
Pt    0.1200    0.2946    0.7733
Pt    0.1236    0.2925    0.8213
Pt    0.1233    0.4745    0.7969
Pt    0.1204    0.3467    0.7729
Pt    0.1216    0.3449    0.8225
Pt    0.0710    0.2719    0.7962
Pt    0.2429    0.3992    0.8480
Pt    0.2470    0.4463    0.7980
Pt    0.1224    0.3432    0.8700
Pt    0.2234    0.4957    0.8211
Pt    0.1499    0.4713    0.8723
Pt    0.0982    0.4955    0.8473
Pt    0.0472    0.4704    0.8701
Pt    0.2468    0.3969    0.7956
Pt    0.0701    0.3228    0.7487
Pt    0.0215    0.4467    0.8707
Pt    0.1953    0.4228    0.8723
Pt    0.2470    0.4250    0.7747
Pt    0.2469    0.3244    0.7758
Pt    0.2458    0.4498    0.7491
Pt    0.2467    0.4726    0.7736
Pt    0.0714    0.3716    0.7489
Pt    0.2458    0.2498    0.8007
Pt    0.0739    0.2505    0.8235
Pt    0.0213    0.2968    0.8721
Pt    0.1994    0.2493    0.7959
Pt    0.0716    0.2726    0.7482
Pt    0.0704    0.4464    0.8723
Pt    0.1214    0.3961    0.8703
Pt    0.0954    0.2971    0.7507
Pt    0.2469    0.2762    0.8717
Pt    0.1738    0.2487    0.8213
Pt    0.1261    0.4483    0.8710
Pt    0.2427    0.3715    0.7724
Pt    0.0454    0.3505    0.7495
Pt    0.1695    0.3482    0.8714
Pt    0.0975    0.3504    0.7483
Pt    0.0719    0.3485    0.8709
Pt    0.0462    0.3209    0.8713
Pt    0.1701    0.4249    0.7480
Pt    0.0702    0.2950    0.8724
Pt    0.1967    0.2711    0.8718
Pt    0.0451    0.4216    0.8720
Pt    0.0481    0.4973    0.7970
Pt    0.1267    0.4918    0.8725
Pt    0.0202    0.3971    0.8698
Pt    0.0951    0.2741    0.8694
Pt    0.2215    0.4970    0.7729
Pt    0.0000    0.4734    0.8717
Pt    0.1485    0.2725    0.8727
Pt    0.1220    0.2959    0.8724
Pt    0.1197    0.3763    0.7485
Pt    0.0691    0.4247    0.7480
Pt    0.9992    0.4720    0.9766
Pt    0.9986    0.4213    0.9719
Pt    0.1757    0.4946    0.8744
Pt    0.0713    0.2483    0.9227
Pt    0.1710    0.3223    0.8987
Pt    0.9986    0.4714    0.9230
Pt    0.0947    0.4707    0.8760
Pt    0.9979    0.2956    0.8955
Pt    0.0720    0.4008    0.8739
Pt    0.2224    0.4702    0.9486
Pt    0.1706    0.2728    0.9469
Pt    0.1472    0.2495    0.8950
Pt    0.0474    0.2950    0.8956
Pt    0.0465    0.2972    0.9487
Pt    0.0476    0.3447    0.8966
Pt    0.0465    0.3459    0.9451
Pt    0.0442    0.3977    0.8966
Pt    0.0450    0.3957    0.9469
Pt    0.0468    0.4469    0.8974
Pt    0.0499    0.4479    0.9479
Pt    0.9987    0.3208    0.8749
Pt    0.0208    0.3479    0.8743
Pt    0.0937    0.2958    0.8968
Pt    0.0967    0.2958    0.9450
Pt    0.0937    0.3440    0.8979
Pt    0.0973    0.3442    0.9493
Pt    0.0973    0.3923    0.8952
Pt    0.0963    0.3963    0.9466
Pt    0.0977    0.4464    0.8990
Pt    0.0988    0.4468    0.9444
Pt    0.1741    0.2704    0.8976
Pt    0.1477    0.4224    0.8741
Pt    0.1475    0.2968    0.8991
Pt    0.1468    0.2978    0.9503
Pt    0.1457    0.3438    0.8963
Pt    0.1458    0.3464    0.9483
Pt    0.1463    0.3943    0.8971
Pt    0.1447    0.3952    0.9476
Pt    0.1462    0.4469    0.8966
Pt    0.1452    0.4475    0.9508
Pt    0.1205    0.4716    0.9460
Pt    0.9978    0.3455    0.9491
Pt    0.1968    0.2992    0.8986
Pt    0.1967    0.2995    0.9475
Pt    0.1954    0.3438    0.8948
Pt    0.1987    0.3470    0.9491
Pt    0.1945    0.3960    0.8994
Pt    0.1979    0.3951    0.9469
Pt    0.1928    0.4464    0.8982
Pt    0.1992    0.4478    0.9507
Pt    0.2455    0.3229    0.8737
Pt    0.2228    0.3733    0.9006
Pt    0.2224    0.3225    0.9482
Pt    0.2240    0.3213    0.9016
Pt    0.0468    0.4956    0.8946
Pt    0.2223    0.2737    0.9505
Pt    0.2161    0.2721    0.8979
Pt    0.1703    0.4718    0.9526
Pt    0.2246    0.3471    0.8730
Pt    0.2242    0.4734    0.9005
Pt    0.0456    0.2707    0.9262
Pt    0.0456    0.2722    0.9703
Pt    0.0441    0.3211    0.9245
Pt    0.0434    0.3229    0.9727
Pt    0.0468    0.3712    0.9199
Pt    0.0482    0.3706    0.9702
Pt    0.0469    0.4221    0.9205
Pt    0.0455    0.4226    0.9674
Pt    0.0429    0.4730    0.9227
Pt    0.0473    0.4720    0.9741
Pt    0.0981    0.2697    0.9235
Pt    0.0965    0.2737    0.9739
Pt    0.0964    0.3209    0.9222
Pt    0.0991    0.3187    0.9713
Pt    0.0957    0.3676    0.9227
Pt    0.0993    0.3746    0.9725
Pt    0.0964    0.4189    0.9211
Pt    0.0976    0.4219    0.9752
Pt    0.0990    0.4690    0.9219
Pt    0.0961    0.4746    0.9711
Pt    0.1470    0.2718    0.9259
Pt    0.1484    0.2732    0.9748
Pt    0.1469    0.3211    0.9218
Pt    0.1447    0.3254    0.9761
Pt    0.1495    0.3716    0.9239
Pt    0.1458    0.3735    0.9741
Pt    0.1446    0.4211    0.9242
Pt    0.1464    0.4195    0.9724
Pt    0.1474    0.4720    0.9274
Pt    0.1452    0.4730    0.9745
Pt    0.1956    0.2753    0.9242
Pt    0.1945    0.2737    0.9740
Pt    0.1962    0.3233    0.9224
Pt    0.1987    0.3228    0.9727
Pt    0.1947    0.3699    0.9222
Pt    0.1991    0.3691    0.9730
Pt    0.1951    0.4219    0.9203
Pt    0.1971    0.4212    0.9731
Pt    0.1932    0.4699    0.9269
Pt    0.1988    0.4722    0.9730
Pt    0.1716    0.4709    0.8986
Pt    0.1711    0.4186    0.9494
Pt    0.0208    0.2929    0.9241
Pt    0.0208    0.2957    0.9739
Pt    0.0223    0.3458    0.9209
Pt    0.0227    0.3491    0.9734
Pt    0.0226    0.3990    0.9199
Pt    0.0217    0.3964    0.9731
Pt    0.0224    0.4482    0.9220
Pt    0.0218    0.4480    0.9701
Pt    0.1702    0.4192    0.9010
Pt    0.1718    0.3717    0.9493
Pt    0.0708    0.2939    0.9236
Pt    0.0731    0.2960    0.9711
Pt    0.0699    0.3416    0.9201
Pt    0.0709    0.3465    0.9718
Pt    0.0692    0.3950    0.9241
Pt    0.0701    0.3952    0.9689
Pt    0.0700    0.4467    0.9210
Pt    0.0750    0.4465    0.9722
Pt    0.1723    0.4952    0.9221
Pt    0.1720    0.3705    0.8967
Pt    0.1252    0.2956    0.9252
Pt    0.1233    0.2960    0.9730
Pt    0.1203    0.3463    0.9211
Pt    0.1204    0.3468    0.9744
Pt    0.1209    0.3948    0.9245
Pt    0.1235    0.3970    0.9731
Pt    0.1230    0.4467    0.9220
Pt    0.1220    0.4484    0.9742
Pt    0.1726    0.3209    0.9512
Pt    0.2252    0.4201    0.9501
Pt    0.1704    0.2951    0.9231
Pt    0.1712    0.2995    0.9733
Pt    0.1694    0.3441    0.9263
Pt    0.1734    0.3456    0.9732
Pt    0.1728    0.3953    0.9240
Pt    0.1763    0.3936    0.9736
Pt    0.1699    0.4452    0.9247
Pt    0.1721    0.4426    0.9741
Pt    0.2247    0.3716    0.9481
Pt    0.2235    0.4153    0.8988
Pt    0.2236    0.2936    0.9254
Pt    0.2221    0.2956    0.9750
Pt    0.2208    0.3463    0.9236
Pt    0.2238    0.3445    0.9766
Pt    0.2222    0.3953    0.9250
Pt    0.2238    0.3944    0.9734
Pt    0.2213    0.4444    0.9216
Pt    0.2232    0.4474    0.9743
Pt    0.0201    0.2699    0.8995
Pt    0.0189    0.2708    0.9490
Pt    0.0240    0.3189    0.8979
Pt    0.0193    0.3206    0.9500
Pt    0.0202    0.3717    0.8978
Pt    0.0232    0.3720    0.9439
Pt    0.0223    0.4250    0.8956
Pt    0.0204    0.4223    0.9445
Pt    0.0218    0.4705    0.8956
Pt    0.0233    0.4769    0.9496
Pt    0.0730    0.2703    0.8976
Pt    0.0722    0.2689    0.9493
Pt    0.0682    0.3187    0.8968
Pt    0.0738    0.3205    0.9493
Pt    0.0719    0.3718    0.8966
Pt    0.0705    0.3676    0.9461
Pt    0.0713    0.4218    0.8988
Pt    0.0721    0.4220    0.9471
Pt    0.0695    0.4713    0.9016
Pt    0.0709    0.4738    0.9457
Pt    0.1211    0.2696    0.8974
Pt    0.1212    0.2708    0.9505
Pt    0.1188    0.3181    0.8984
Pt    0.1207    0.3207    0.9446
Pt    0.1214    0.3684    0.8981
Pt    0.1205    0.3704    0.9475
Pt    0.1247    0.4192    0.8977
Pt    0.1196    0.4197    0.9487
Pt    0.1234    0.4717    0.8994
Pt    0.1989    0.4963    0.8996
Pt    0.1445    0.3186    0.8746
Pt    0.1727    0.2963    0.8742
Pt    0.2199    0.2969    0.8740
Pt    0.2214    0.4468    0.8781
Pt    0.0438    0.2693    0.8743
Pt    0.1196    0.2488    0.8748
Pt    0.2012    0.3716    0.8733
Pt    0.0982    0.4261    0.8730
Pt    0.0727    0.4197    0.9972
Pt    0.0477    0.4455    0.9969
Pt    0.1977    0.3211    0.8731
Pt    0.1956    0.4967    0.9533
Pt    0.2449    0.2684    0.9244
Pt    0.2476    0.3456    0.9497
Pt    0.1700    0.4981    0.9746
Pt    0.2468    0.3702    0.9237
Pt    0.2463    0.2966    0.9479
Pt    0.9982    0.3971    0.9467
Pt    0.2215    0.2735    0.9975
Pt    0.1460    0.4959    0.9489
Pt    0.1726    0.4465    0.8741
Pt    0.1211    0.4724    0.9971
Pt    0.1717    0.3700    0.9965
Pt    0.1494    0.4943    0.8976
Pt    0.1955    0.2488    0.9969
Pt    0.2226    0.4970    0.9767
Pt    0.2465    0.2974    0.8973
Pt    0.2190    0.4962    0.9262
Pt    0.1958    0.2968    0.9965
Pt    0.1740    0.4698    0.9966
Pt    0.1437    0.3709    0.8740
Pt    0.0466    0.3967    0.9935
Pt    0.0450    0.3712    0.8738
Pt    0.0248    0.4237    0.9925
Pt    0.1982    0.3461    0.9975
Pt    0.0722    0.3247    0.9970
Pt    0.1235    0.4971    0.9230
Pt    0.0678    0.3718    0.9959
Pt    0.1971    0.4448    0.9972
Pt    0.1716    0.2496    0.9210
Pt    0.0208    0.2718    0.9969
Pt    0.0976    0.3490    0.9970
Pt    0.2464    0.2718    0.9752
Pt    0.0743    0.4679    0.9960
Pt    0.0723    0.2724    0.9972
Pt    0.2257    0.4220    0.9956
Pt    0.1211    0.4969    0.9704
Pt    0.1736    0.3946    0.8757
Pt    0.2465    0.4709    0.9712
Pt    0.2440    0.4961    0.9490
Pt    0.0962    0.4962    0.8977
Pt    0.2214    0.4710    0.9968
Pt    0.1708    0.2732    0.9964
Pt    0.0254    0.4711    0.9972
Pt    0.0000    0.3458    0.9976
Pt    0.0461    0.3463    0.9972
Pt    0.0948    0.3936    0.9979
Pt    0.9997    0.4479    0.9977
Pt    0.0974    0.3691    0.8729
Pt    0.2189    0.3979    0.8743
Pt    0.0968    0.3180    0.8739
Pt    0.1991    0.4717    0.8739
Pt    0.0017    0.6458    0.0474
Pt    0.2016    0.5976    0.0007
Pt    0.2242    0.7242    0.0955
Pt    0.9978    0.5474    0.0009
Pt    0.0005    0.5493    0.0481
Pt    0.1736    0.5240    0.9983
Pt    0.2174    0.7268    0.0427
Pt    0.0525    0.4991    0.1003
Pt    0.2257    0.5723    0.0976
Pt    0.1714    0.4983    0.0689
Pt    0.9990    0.5981    0.0453
Pt    0.2276    0.5735    0.0477
Pt    0.2434    0.6767    0.0233
Pt    0.1008    0.5004    0.0988
Pt    0.2270    0.6773    0.0975
Pt    0.9991    0.6233    0.0722
Pt    0.2272    0.5196    0.9986
Pt    0.0736    0.5752    0.0955
Pt    0.9989    0.6716    0.0210
Pt    0.0492    0.5467    0.0462
Pt    0.0486    0.5517    0.0991
Pt    0.0257    0.4992    0.0228
Pt    0.0498    0.5979    0.0458
Pt    0.0542    0.6025    0.0975
Pt    0.0785    0.5740    0.0003
Pt    0.0483    0.6472    0.0433
Pt    0.0490    0.6481    0.0992
Pt    0.1002    0.5485    0.0007
Pt    0.0485    0.6956    0.0494
Pt    0.0530    0.6967    0.0953
Pt    0.2013    0.6730    0.1195
Pt    0.0716    0.5732    0.0466
Pt    0.1713    0.6729    0.0491
Pt    0.1738    0.5245    0.0478
Pt    0.0968    0.5474    0.0506
Pt    0.1002    0.5495    0.1022
Pt    0.1244    0.7285    0.0967
Pt    0.1013    0.6008    0.0466
Pt    0.1005    0.6019    0.0970
Pt    0.1250    0.7258    0.0461
Pt    0.0993    0.6474    0.0470
Pt    0.1006    0.6485    0.0996
Pt    0.1696    0.7247    0.0438
Pt    0.1016    0.6990    0.0484
Pt    0.0997    0.7033    0.0959
Pt    0.9997    0.6025    0.0977
Pt    0.0747    0.5265    0.1002
Pt    0.1226    0.6763    0.0968
Pt    0.1218    0.6738    0.0474
Pt    0.1476    0.5487    0.0483
Pt    0.1493    0.5505    0.0994
Pt    0.1762    0.6221    0.0958
Pt    0.1493    0.6011    0.0456
Pt    0.1533    0.5977    0.0949
Pt    0.1270    0.6223    0.0960
Pt    0.1491    0.6489    0.0493
Pt    0.1523    0.6473    0.0992
Pt    0.2270    0.5748    0.0005
Pt    0.1467    0.6997    0.0486
Pt    0.1490    0.6979    0.1002
Pt    0.1247    0.6243    0.0477
Pt    0.0759    0.5218    0.0490
Pt    0.1233    0.5710    0.1000
Pt    0.1222    0.5725    0.0475
Pt    0.1979    0.5464    0.0480
Pt    0.1986    0.5478    0.0986
Pt    0.1747    0.5237    0.0937
Pt    0.2020    0.6011    0.0502
Pt    0.2019    0.5967    0.0974
Pt    0.1263    0.5276    0.0993
Pt    0.1966    0.6514    0.0489
Pt    0.2001    0.6463    0.0959
Pt    0.0266    0.7212    0.0962
Pt    0.1955    0.6996    0.0496
Pt    0.1963    0.6992    0.0965
Pt    0.1255    0.5244    0.0449
Pt    0.0266    0.7216    0.0487
Pt    0.0735    0.7290    0.0960
Pt    0.1194    0.7483    0.0188
Pt    0.0737    0.7219    0.0455
Pt    0.1743    0.5735    0.0969
Pt    0.9982    0.7234    0.0235
Pt    0.2250    0.5262    0.0962
Pt    0.2199    0.6757    0.0490
Pt    0.0253    0.6732    0.0959
Pt    0.0507    0.5194    0.0229
Pt    0.0489    0.5238    0.0746
Pt    0.0506    0.5723    0.0220
Pt    0.0494    0.5754    0.0710
Pt    0.0505    0.6223    0.0223
Pt    0.0486    0.6261    0.0738
Pt    0.0488    0.6715    0.0198
Pt    0.0511    0.6717    0.0738
Pt    0.0475    0.7248    0.0233
Pt    0.0516    0.7216    0.0719
Pt    0.0975    0.5211    0.0226
Pt    0.0985    0.5200    0.0718
Pt    0.0979    0.5715    0.0274
Pt    0.0977    0.5751    0.0713
Pt    0.1011    0.6248    0.0207
Pt    0.0989    0.6256    0.0716
Pt    0.1006    0.6742    0.0177
Pt    0.1019    0.6726    0.0713
Pt    0.0995    0.7202    0.0218
Pt    0.0998    0.7248    0.0736
Pt    0.1490    0.5223    0.0231
Pt    0.1474    0.5234    0.0719
Pt    0.1490    0.5706    0.0195
Pt    0.1491    0.5712    0.0721
Pt    0.1494    0.6258    0.0209
Pt    0.1503    0.6235    0.0718
Pt    0.1486    0.6727    0.0225
Pt    0.1466    0.6745    0.0744
Pt    0.1446    0.7273    0.0168
Pt    0.1472    0.7234    0.0682
Pt    0.2015    0.5233    0.0213
Pt    0.2026    0.5222    0.0705
Pt    0.2001    0.5731    0.0262
Pt    0.1999    0.5721    0.0716
Pt    0.1974    0.6245    0.0234
Pt    0.2012    0.6252    0.0705
Pt    0.1971    0.6735    0.0223
Pt    0.1989    0.6715    0.0743
Pt    0.1936    0.7223    0.0198
Pt    0.1965    0.7210    0.0712
Pt    0.0765    0.6740    0.0990
Pt    0.1724    0.5716    0.0458
Pt    0.0257    0.5478    0.0222
Pt    0.0264    0.5505    0.0733
Pt    0.0270    0.5980    0.0237
Pt    0.0239    0.5997    0.0689
Pt    0.0231    0.6489    0.0228
Pt    0.0249    0.6488    0.0721
Pt    0.0251    0.7003    0.0238
Pt    0.0230    0.6968    0.0726
Pt    0.2240    0.5191    0.0463
Pt    0.2271    0.6241    0.0487
Pt    0.0751    0.5481    0.0246
Pt    0.0733    0.5499    0.0768
Pt    0.0765    0.6007    0.0221
Pt    0.0758    0.5982    0.0691
Pt    0.0753    0.6469    0.0202
Pt    0.0737    0.6484    0.0735
Pt    0.0715    0.6957    0.0227
Pt    0.0786    0.6957    0.0710
Pt    0.0773    0.6723    0.0455
Pt    0.2257    0.6247    0.0983
Pt    0.1249    0.5463    0.0225
Pt    0.1219    0.5475    0.0731
Pt    0.1251    0.5998    0.0223
Pt    0.1276    0.5972    0.0693
Pt    0.1241    0.6493    0.0200
Pt    0.1256    0.6481    0.0743
Pt    0.1271    0.6972    0.0246
Pt    0.1257    0.7008    0.0745
Pt    0.0778    0.6267    0.0995
Pt    0.1738    0.6263    0.0476
Pt    0.1774    0.5490    0.0243
Pt    0.1747    0.5459    0.0729
Pt    0.1723    0.5990    0.0222
Pt    0.1753    0.6007    0.0690
Pt    0.1722    0.6474    0.0221
Pt    0.1728    0.6485    0.0747
Pt    0.1690    0.7005    0.0207
Pt    0.1711    0.6994    0.0741
Pt    0.0232    0.6729    0.0435
Pt    0.1755    0.7254    0.0977
Pt    0.2241    0.5494    0.0250
Pt    0.2263    0.5496    0.0721
Pt    0.2246    0.5976    0.0242
Pt    0.2259    0.5972    0.0749
Pt    0.2207    0.6478    0.0248
Pt    0.2266    0.6506    0.0708
Pt    0.2212    0.7000    0.0202
Pt    0.2245    0.7009    0.0720
Pt    0.0258    0.6206    0.0982
Pt    0.0219    0.5236    0.0494
Pt    0.0217    0.5243    0.0971
Pt    0.0737    0.6236    0.0463
Pt    0.0242    0.5744    0.0477
Pt    0.0234    0.5732    0.0951
Pt    0.1724    0.6739    0.0964
Pt    0.0242    0.6237    0.0464
Pt    0.0770    0.7001    0.1221
Pt    0.0003    0.7001    0.0491
Pt    0.9979    0.6943    0.0975
Pt    0.0007    0.5755    0.0706
Pt    0.0220    0.5715    0.0008
Pt    0.1753    0.5986    0.1220
Pt    0.2461    0.6469    0.0001
Pt    0.1481    0.7277    0.1219
Pt    0.9989    0.6732    0.0710
Pt    0.0253    0.5234    0.9995
Pt    0.0728    0.7232    0.9982
Pt    0.0261    0.5980    0.1205
Pt    0.2464    0.7002    0.0475
Pt    0.1781    0.5736    0.0007
Pt    0.0011    0.4999    0.0006
Pt    0.9998    0.6495    0.0981
Pt    0.0492    0.5237    0.1200
Pt    0.9984    0.5502    0.0949
Pt    0.2001    0.6226    0.1211
Pt    0.2204    0.7483    0.0728
Pt    0.1507    0.5230    0.1222
Pt    0.0724    0.7482    0.0210
Pt    0.1479    0.5006    0.0972
Pt    0.0498    0.5011    0.0520
Pt    0.0483    0.7252    0.1202
Pt    0.1981    0.4992    0.0469
Pt    0.0285    0.7467    0.0729
Pt    0.2460    0.7457    0.0496
Pt    0.2476    0.6006    0.1004
Pt    0.1723    0.6976    0.1210
Pt    0.1258    0.6461    0.1206
Pt    0.1261    0.5967    0.1224
Pt    0.0984    0.7262    0.1201
Pt    0.0269    0.6968    0.1213
Pt    0.2002    0.5216    0.1211
Pt    0.0223    0.5466    0.1202
Pt    0.2281    0.6514    0.1209
Pt    0.9984    0.7228    0.0746
Pt    0.1513    0.6217    0.1222
Pt    0.1997    0.5739    0.1210
Pt    0.9989    0.5747    0.1196
Pt    0.2474    0.7245    0.1221
Pt    0.2228    0.5479    0.1206
Pt    0.0266    0.6234    0.9991
Pt    0.1260    0.6995    0.1223
Pt    0.0770    0.5966    0.1210
Pt    0.1493    0.5972    0.9980
Pt    0.2227    0.7242    0.9989
Pt    0.0511    0.5489    0.9987
Pt    0.0490    0.6466    0.9986
Pt    0.9979    0.5246    0.0744
Pt    0.9992    0.5762    0.0231
Pt    0.9982    0.7222    0.1186
Pt    0.0481    0.7481    0.0461
Pt    0.0480    0.6729    0.1222
Pt    0.0216    0.6474    0.1225
Pt    0.0009    0.5212    0.1225
Pt    0.1995    0.7275    0.1224
Pt    0.1239    0.5734    0.9988
Pt    0.0980    0.4984    0.9980
Pt    0.2230    0.7230    0.1987
Pt    0.2226    0.7254    0.1478
Pt    0.1739    0.5009    0.2218
Pt    0.0495    0.4996    0.1986
Pt    0.9991    0.6483    0.1489
Pt    0.1774    0.5466    0.1239
Pt    0.1977    0.5015    0.1982
Pt    0.2260    0.6742    0.1967
Pt    0.2257    0.6739    0.1457
Pt    0.2251    0.6218    0.1958
Pt    0.0008    0.6210    0.2232
Pt    0.0241    0.4987    0.2249
Pt    0.0469    0.5475    0.1490
Pt    0.0507    0.5498    0.1953
Pt    0.0484    0.5990    0.1465
Pt    0.0519    0.5996    0.1972
Pt    0.0515    0.6483    0.1440
Pt    0.0513    0.6512    0.1983
Pt    0.0480    0.6996    0.1458
Pt    0.0457    0.6988    0.1964
Pt    0.0733    0.4989    0.1761
Pt    0.2225    0.7475    0.2231
Pt    0.0966    0.5489    0.1480
Pt    0.0982    0.5469    0.1991
Pt    0.1003    0.5969    0.1490
Pt    0.1002    0.6014    0.1955
Pt    0.1012    0.6481    0.1455
Pt    0.1039    0.6507    0.1951
Pt    0.0981    0.6995    0.1474
Pt    0.0988    0.6984    0.1917
Pt    0.2266    0.6500    0.1730
Pt    0.2249    0.5968    0.1237
Pt    0.1496    0.5460    0.1503
Pt    0.1463    0.5516    0.1958
Pt    0.1494    0.5987    0.1479
Pt    0.1481    0.5979    0.1977
Pt    0.1502    0.6455    0.1441
Pt    0.1520    0.6508    0.1964
Pt    0.1488    0.6992    0.1477
Pt    0.1494    0.6996    0.1951
Pt    0.9989    0.5989    0.1985
Pt    0.1749    0.6750    0.2460
Pt    0.2000    0.5509    0.1475
Pt    0.2006    0.5475    0.1972
Pt    0.1993    0.5997    0.1483
Pt    0.2006    0.5976    0.1954
Pt    0.2002    0.6482    0.1464
Pt    0.2020    0.6483    0.1947
Pt    0.1991    0.6982    0.1445
Pt    0.1979    0.6984    0.1954
Pt    0.2256    0.5998    0.2217
Pt    0.0986    0.6987    0.2454
Pt    0.2239    0.6248    0.1462
Pt    0.0018    0.5467    0.1463
Pt    0.0749    0.7236    0.1967
Pt    0.0751    0.5745    0.1993
Pt    0.2264    0.5969    0.1731
Pt    0.2277    0.4994    0.1730
Pt    0.2223    0.5727    0.2003
Pt    0.1476    0.6986    0.2460
Pt    0.2258    0.5735    0.1490
Pt    0.2224    0.5237    0.1965
Pt    0.2237    0.5219    0.1456
Pt    0.1731    0.7263    0.1941
Pt    0.1735    0.7233    0.1449
Pt    0.0714    0.7249    0.1431
Pt    0.0477    0.5214    0.1714
Pt    0.0495    0.5286    0.2248
Pt    0.0719    0.7261    0.2436
Pt    0.0506    0.5722    0.1736
Pt    0.0480    0.5755    0.2254
Pt    0.0744    0.5731    0.1497
Pt    0.0504    0.6263    0.1715
Pt    0.0480    0.6276    0.2242
Pt    0.0757    0.5240    0.2025
Pt    0.0470    0.6725    0.1744
Pt    0.0475    0.6749    0.2222
Pt    0.2239    0.4988    0.2206
Pt    0.0506    0.7244    0.1715
Pt    0.0473    0.7250    0.2191
Pt    0.0721    0.5244    0.1491
Pt    0.0999    0.5217    0.1739
Pt    0.0999    0.5252    0.2252
Pt    0.0217    0.7232    0.1953
Pt    0.0979    0.5729    0.1754
Pt    0.0989    0.5725    0.2257
Pt    0.0237    0.7240    0.1445
Pt    0.1005    0.6249    0.1701
Pt    0.1003    0.6262    0.2236
Pt    0.0197    0.6737    0.1957
Pt    0.1012    0.6746    0.1702
Pt    0.0994    0.6720    0.2212
Pt    0.1786    0.6737    0.1965
Pt    0.0943    0.7260    0.1689
Pt    0.0985    0.7243    0.2212
Pt    0.1765    0.6747    0.1456
Pt    0.1471    0.5212    0.1752
Pt    0.1503    0.5271    0.2228
Pt    0.1777    0.6252    0.1951
Pt    0.1459    0.5737    0.1713
Pt    0.1460    0.5746    0.2211
Pt    0.1752    0.6224    0.1454
Pt    0.1493    0.6241    0.1736
Pt    0.1497    0.6241    0.2243
Pt    0.0746    0.6756    0.1968
Pt    0.1507    0.6761    0.1727
Pt    0.1508    0.6729    0.2207
Pt    0.9999    0.6707    0.1247
Pt    0.1477    0.7256    0.1698
Pt    0.1480    0.7252    0.2216
Pt    0.0256    0.6712    0.1481
Pt    0.2030    0.5253    0.1707
Pt    0.1973    0.5245    0.2238
Pt    0.0742    0.6734    0.1451
Pt    0.1996    0.5744    0.1732
Pt    0.2009    0.5711    0.2233
Pt    0.0246    0.6245    0.1974
Pt    0.2015    0.6257    0.1720
Pt    0.1990    0.6268    0.2213
Pt    0.0750    0.6262    0.2019
Pt    0.2002    0.6729    0.1693
Pt    0.2012    0.6729    0.2215
Pt    0.1759    0.5769    0.1987
Pt    0.1987    0.7236    0.1712
Pt    0.1963    0.7215    0.2213
Pt    0.1727    0.5750    0.1499
Pt    0.2243    0.5470    0.2218
Pt    0.0233    0.6247    0.1480
Pt    0.1747    0.5265    0.1995
Pt    0.0247    0.5485    0.1736
Pt    0.0215    0.5513    0.2233
Pt    0.2275    0.5501    0.1733
Pt    0.0265    0.5965    0.1750
Pt    0.0262    0.5991    0.2263
Pt    0.1753    0.5198    0.1469
Pt    0.0213    0.6492    0.1747
Pt    0.0264    0.6505    0.2215
Pt    0.0254    0.5758    0.2012
Pt    0.0215    0.6979    0.1690
Pt    0.0204    0.7013    0.2223
Pt    0.0252    0.5741    0.1459
Pt    0.0238    0.5269    0.1992
Pt    0.0257    0.5207    0.1442
Pt    0.1242    0.7242    0.1952
Pt    0.0735    0.5458    0.1730
Pt    0.0729    0.5503    0.2224
Pt    0.1191    0.7276    0.1479
Pt    0.0733    0.6001    0.1734
Pt    0.0774    0.5993    0.2211
Pt    0.2249    0.6986    0.2207
Pt    0.0742    0.6522    0.1758
Pt    0.0736    0.6522    0.2258
Pt    0.2270    0.6479    0.2209
Pt    0.0735    0.6957    0.1701
Pt    0.0729    0.6994    0.2191
Pt    0.2255    0.6982    0.1693
Pt    0.0743    0.6199    0.1471
Pt    0.1269    0.6757    0.1973
Pt    0.1219    0.5213    0.1487
Pt    0.1230    0.5479    0.1693
Pt    0.1219    0.5468    0.2221
Pt    0.1220    0.5728    0.1949
Pt    0.1242    0.5991    0.1726
Pt    0.1228    0.5975    0.2189
Pt    0.1243    0.5735    0.1481
Pt    0.1274    0.6490    0.1721
Pt    0.1258    0.6490    0.2235
Pt    0.1244    0.5208    0.1969
Pt    0.1249    0.6999    0.1714
Pt    0.1225    0.7018    0.2199
Pt    0.1259    0.6730    0.1487
Pt    0.9997    0.5232    0.1727
Pt    0.1250    0.6279    0.1986
Pt    0.9995    0.5765    0.2244
Pt    0.1732    0.5488    0.1717
Pt    0.1732    0.5515    0.2212
Pt    0.1242    0.6229    0.1479
Pt    0.1720    0.6008    0.1722
Pt    0.1756    0.6015    0.2216
Pt    0.1708    0.6990    0.2218
Pt    0.1724    0.6507    0.1703
Pt    0.1760    0.6499    0.2233
Pt    0.0242    0.7470    0.1704
Pt    0.1761    0.6981    0.1706
Pt    0.0010    0.6215    0.1744
Pt    0.2234    0.6250    0.2477
Pt    0.1519    0.5745    0.1236
Pt    0.0513    0.5751    0.1244
Pt    0.1490    0.5005    0.1496
Pt    0.1012    0.6747    0.1248
Pt    0.1974    0.6009    0.2446
Pt    0.9995    0.5031    0.2015
Pt    0.0217    0.7253    0.2450
Pt    0.0227    0.4983    0.1788
Pt    0.0511    0.6241    0.1233
Pt    0.0034    0.5755    0.1725
Pt    0.0772    0.6487    0.1232
Pt    0.0000    0.5978    0.1469
Pt    0.1236    0.4990    0.2231
Pt    0.0967    0.7478    0.1973
Pt    0.1968    0.7472    0.1501
Pt    0.1743    0.5760    0.2449
Pt    0.0971    0.5206    0.1258
Pt    0.0193    0.6754    0.2455
Pt    0.9996    0.5266    0.2260
Pt    0.1239    0.6744    0.2471
Pt    0.2461    0.5723    0.2213
Pt    0.9978    0.6204    0.1229
Pt    0.1756    0.7481    0.2242
Pt    0.1465    0.5994    0.2459
Pt    0.1010    0.6216    0.1249
Pt    0.1001    0.5717    0.1251
Pt    0.1245    0.5468    0.1257
Pt    0.1991    0.7011    0.2477
Pt    0.1258    0.4997    0.1236
Pt    0.2241    0.7228    0.2451
Pt    0.0218    0.7450    0.2210
Pt    0.2254    0.5244    0.2462
Pt    0.0732    0.5474    0.1252
Pt    0.9977    0.6738    0.1711
Pt    0.1241    0.5249    0.2470
Pt    0.9985    0.5992    0.2466
Pt    0.1995    0.7458    0.2454
Pt    0.1758    0.5243    0.2464
Pt    0.1463    0.5497    0.2465
Pt    0.1250    0.7266    0.2465
Pt    0.1728    0.7242    0.2470
Pt    0.0455    0.6983    0.2458
Pt    0.1491    0.5007    0.2457
Pt    0.2232    0.5766    0.2469
Pt    0.2240    0.6742    0.2458
Pt    0.1473    0.6743    0.1249
Pt    0.1958    0.5491    0.2473
Pt    0.2249    0.6994    0.1229
Pt    0.1762    0.6475    0.1229
Pt    0.2227    0.7233    0.3521
Pt    0.2256    0.7205    0.2979
Pt    0.0969    0.5963    0.2488
Pt    0.2234    0.6706    0.3459
Pt    0.9981    0.5256    0.2751
Pt    0.2270    0.6712    0.2978
Pt    0.1504    0.7475    0.3506
Pt    0.2475    0.5766    0.3217
Pt    0.2228    0.6239    0.3519
Pt    0.2213    0.6226    0.2993
Pt    0.0194    0.4999    0.3266
Pt    0.0230    0.5741    0.2520
Pt    0.2239    0.5735    0.3493
Pt    0.2472    0.6009    0.3480
Pt    0.0710    0.5761    0.2494
Pt    0.9979    0.6259    0.2761
Pt    0.0725    0.4994    0.2749
Pt    0.1743    0.5008    0.2730
Pt    0.0468    0.5489    0.3013
Pt    0.0444    0.5496    0.3502
Pt    0.9983    0.7246    0.3190
Pt    0.0451    0.6003    0.3001
Pt    0.0478    0.5985    0.3468
Pt    0.0464    0.5491    0.2498
Pt    0.0475    0.6503    0.2993
Pt    0.0495    0.6513    0.3520
Pt    0.2228    0.4993    0.3254
Pt    0.0454    0.7008    0.2988
Pt    0.0432    0.6962    0.3473
Pt    0.0983    0.5486    0.2498
Pt    0.1465    0.4992    0.3478
Pt    0.0495    0.7446    0.2970
Pt    0.1962    0.5018    0.3492
Pt    0.0966    0.5475    0.2978
Pt    0.0981    0.5490    0.3476
Pt    0.0466    0.5003    0.3488
Pt    0.1006    0.5991    0.2977
Pt    0.0954    0.5989    0.3481
Pt    0.1721    0.5251    0.3537
Pt    0.1003    0.6533    0.2981
Pt    0.0973    0.6488    0.3480
Pt    0.1722    0.5241    0.2955
Pt    0.0968    0.6982    0.2950
Pt    0.0992    0.7005    0.3472
Pt    0.0479    0.5000    0.2517
Pt    0.0485    0.7480    0.3452
Pt    0.1481    0.6493    0.2488
Pt    0.1240    0.7254    0.3449
Pt    0.1475    0.5497    0.2934
Pt    0.1485    0.5496    0.3461
Pt    0.1239    0.7272    0.2965
Pt    0.1506    0.5990    0.3000
Pt    0.1495    0.6024    0.3493
Pt    0.1256    0.6776    0.3479
Pt    0.1487    0.6475    0.2957
Pt    0.1493    0.6547    0.3483
Pt    0.1221    0.6780    0.2957
Pt    0.1472    0.6993    0.2961
Pt    0.1463    0.7009    0.3449
Pt    0.0982    0.5000    0.3000
Pt    0.1283    0.6266    0.3493
Pt    0.1729    0.6783    0.3469
Pt    0.1240    0.6258    0.2966
Pt    0.1961    0.5494    0.2968
Pt    0.1938    0.5476    0.3478
Pt    0.1222    0.5766    0.3483
Pt    0.1979    0.5989    0.2980
Pt    0.1965    0.6003    0.3488
Pt    0.1223    0.5748    0.2995
Pt    0.1979    0.6510    0.2977
Pt    0.1973    0.6459    0.3504
Pt    0.9990    0.4994    0.2507
Pt    0.1988    0.6965    0.2973
Pt    0.2002    0.6964    0.3492
Pt    0.2220    0.5761    0.2951
Pt    0.1228    0.5259    0.3490
Pt    0.2246    0.5250    0.3479
Pt    0.2220    0.5267    0.2981
Pt    0.1219    0.5233    0.2994
Pt    0.0244    0.4995    0.2752
Pt    0.1729    0.7248    0.3491
Pt    0.2473    0.5229    0.3241
Pt    0.1776    0.7248    0.2992
Pt    0.2195    0.5484    0.3718
Pt    0.0482    0.5234    0.2750
Pt    0.0440    0.5238    0.3243
Pt    0.0464    0.5796    0.2732
Pt    0.0429    0.5730    0.3280
Pt    0.0464    0.6259    0.2759
Pt    0.0493    0.6278    0.3273
Pt    0.0476    0.6767    0.2753
Pt    0.0474    0.6757    0.3208
Pt    0.0503    0.7218    0.2721
Pt    0.0493    0.7229    0.3237
Pt    0.0967    0.5244    0.2759
Pt    0.0965    0.5231    0.3233
Pt    0.0961    0.5726    0.2738
Pt    0.0940    0.5741    0.3186
Pt    0.0982    0.6257    0.2748
Pt    0.0995    0.6222    0.3224
Pt    0.0997    0.6737    0.2719
Pt    0.1002    0.6732    0.3234
Pt    0.0986    0.7240    0.2700
Pt    0.0970    0.7271    0.3223
Pt    0.1480    0.5241    0.2734
Pt    0.1465    0.5241    0.3233
Pt    0.1493    0.5732    0.2728
Pt    0.1489    0.5746    0.3262
Pt    0.1477    0.6220    0.2726
Pt    0.1480    0.6271    0.3236
Pt    0.1506    0.6760    0.2710
Pt    0.1476    0.6762    0.3193
Pt    0.1485    0.7279    0.2724
Pt    0.1482    0.7254    0.3215
Pt    0.1995    0.5242    0.2720
Pt    0.1970    0.5229    0.3225
Pt    0.1980    0.5750    0.2710
Pt    0.1999    0.5704    0.3271
Pt    0.1980    0.6230    0.2734
Pt    0.1976    0.6253    0.3210
Pt    0.1997    0.6739    0.2701
Pt    0.1986    0.6741    0.3233
Pt    0.2001    0.7225    0.2732
Pt    0.1992    0.7229    0.3245
Pt    0.1723    0.6754    0.2955
Pt    0.0743    0.7237    0.3462
Pt    0.0239    0.5508    0.2761
Pt    0.0202    0.5510    0.3250
Pt    0.0234    0.6048    0.2746
Pt    0.0226    0.6001    0.3253
Pt    0.0219    0.6549    0.2714
Pt    0.0195    0.6475    0.3225
Pt    0.0205    0.7011    0.2726
Pt    0.0214    0.7017    0.3205
Pt    0.1731    0.6230    0.3489
Pt    0.0743    0.5232    0.2508
Pt    0.0724    0.5497    0.2725
Pt    0.0723    0.5465    0.3244
Pt    0.0745    0.6022    0.2775
Pt    0.0745    0.6010    0.3226
Pt    0.0727    0.6522    0.2733
Pt    0.0751    0.6511    0.3236
Pt    0.0743    0.7000    0.2688
Pt    0.0724    0.6988    0.3225
Pt    0.1742    0.6245    0.2985
Pt    0.2462    0.5262    0.2729
Pt    0.1218    0.5496    0.2729
Pt    0.1225    0.5509    0.3238
Pt    0.1234    0.5959    0.2742
Pt    0.1271    0.6012    0.3232
Pt    0.1258    0.6503    0.2702
Pt    0.1231    0.6492    0.3257
Pt    0.1231    0.7008    0.2713
Pt    0.1216    0.7017    0.3196
Pt    0.0739    0.7222    0.2982
Pt    0.1211    0.4994    0.3250
Pt    0.1725    0.5480    0.2720
Pt    0.1718    0.5495    0.3212
Pt    0.1718    0.5980    0.2740
Pt    0.1712    0.6006    0.3255
Pt    0.1748    0.6478    0.2720
Pt    0.1749    0.6507    0.3253
Pt    0.1710    0.7015    0.2709
Pt    0.1726    0.7016    0.3206
Pt    0.1696    0.5721    0.3518
Pt    0.1766    0.5753    0.3011
Pt    0.2229    0.5500    0.2722
Pt    0.2250    0.5508    0.3209
Pt    0.2257    0.5996    0.2722
Pt    0.2206    0.5971    0.3225
Pt    0.2241    0.6477    0.2739
Pt    0.2223    0.6489    0.3202
Pt    0.2240    0.6973    0.2710
Pt    0.2265    0.6939    0.3233
Pt    0.2242    0.7482    0.3227
Pt    0.0190    0.5256    0.2999
Pt    0.0215    0.5247    0.3490
Pt    0.1251    0.4988    0.2749
Pt    0.0225    0.5777    0.2992
Pt    0.0160    0.5732    0.3497
Pt    0.0216    0.5253    0.2496
Pt    0.0221    0.6265    0.2989
Pt    0.0242    0.6228    0.3477
Pt    0.0741    0.6764    0.3454
Pt    0.0215    0.6748    0.2970
Pt    0.0190    0.6723    0.3443
Pt    0.0749    0.6742    0.2982
Pt    0.0233    0.7252    0.2947
Pt    0.0212    0.7244    0.3456
Pt    0.0494    0.6008    0.2495
Pt    0.0697    0.5218    0.3013
Pt    0.0719    0.5235    0.3477
Pt    0.0749    0.6233    0.3490
Pt    0.0684    0.5762    0.2973
Pt    0.0720    0.5734    0.3466
Pt    0.0735    0.6264    0.2992
Pt    0.0438    0.5004    0.3009
Pt    0.1235    0.5717    0.2481
Pt    0.0722    0.6989    0.3708
Pt    0.0691    0.6757    0.2501
Pt    0.0752    0.6244    0.2507
Pt    0.0964    0.6768    0.3721
Pt    0.1210    0.6216    0.2492
Pt    0.0472    0.7247    0.3709
Pt    0.0964    0.5008    0.3503
Pt    0.2238    0.4988    0.2711
Pt    0.2234    0.4984    0.3704
Pt    0.1722    0.4994    0.3258
Pt    0.1753    0.7481    0.3231
Pt    0.0706    0.5972    0.3725
Pt    0.0987    0.6482    0.2487
Pt    0.0182    0.6493    0.3676
Pt    0.2469    0.6241    0.3228
Pt    0.1980    0.6469    0.2490
Pt    0.1980    0.5011    0.2983
Pt    0.0475    0.6514    0.2483
Pt    0.0986    0.4998    0.2485
Pt    0.0952    0.5717    0.3716
Pt    0.2471    0.7255    0.3249
Pt    0.1211    0.6010    0.3704
Pt    0.0474    0.6232    0.3724
Pt    0.0200    0.7463    0.3711
Pt    0.2195    0.5987    0.3722
Pt    0.2470    0.5997    0.2979
Pt    0.1242    0.7070    0.3714
Pt    0.2210    0.6518    0.3719
Pt    0.1487    0.6787    0.3722
Pt    0.1741    0.7004    0.3706
Pt    0.1723    0.6493    0.3712
Pt    0.2471    0.5734    0.3725
Pt    0.1965    0.5735    0.3722
Pt    0.1934    0.6752    0.3727
Pt    0.1740    0.6258    0.2480
Pt    0.0264    0.6263    0.2485
Pt    0.2476    0.6503    0.2481
Pt    0.1952    0.6240    0.3750
Pt    0.1733    0.5011    0.4242
Pt    0.2231    0.7241    0.4476
Pt    0.0461    0.5474    0.3983
Pt    0.0930    0.5745    0.4710
Pt    0.0447    0.5962    0.3971
Pt    0.0455    0.5965    0.4437
Pt    0.0434    0.6481    0.3975
Pt    0.0456    0.6531    0.4498
Pt    0.0483    0.6987    0.3974
Pt    0.0448    0.6979    0.4489
Pt    0.2459    0.5199    0.4220
Pt    0.0956    0.5483    0.3969
Pt    0.0933    0.5477    0.4460
Pt    0.0938    0.6007    0.3950
Pt    0.0938    0.5981    0.4446
Pt    0.0982    0.6497    0.3983
Pt    0.0950    0.6502    0.4458
Pt    0.0912    0.6981    0.3978
Pt    0.0954    0.6985    0.4469
Pt    0.0208    0.7472    0.4200
Pt    0.2472    0.6451    0.4474
Pt    0.1446    0.5509    0.3971
Pt    0.1485    0.5516    0.4478
Pt    0.1483    0.5965    0.4020
Pt    0.1483    0.6035    0.4492
Pt    0.1493    0.6500    0.3978
Pt    0.1430    0.6521    0.4483
Pt    0.1488    0.7008    0.3982
Pt    0.1477    0.6984    0.4491
Pt    0.1729    0.4986    0.3748
Pt    0.2474    0.5249    0.4763
Pt    0.1950    0.5524    0.3959
Pt    0.1977    0.5497    0.4493
Pt    0.1952    0.5953    0.3996
Pt    0.1994    0.5979    0.4515
Pt    0.1956    0.6507    0.3993
Pt    0.1997    0.6471    0.4492
Pt    0.1960    0.6994    0.3982
Pt    0.1974    0.6970    0.4448
Pt    0.0720    0.4983    0.3736
Pt    0.0958    0.5006    0.4004
Pt    0.2241    0.6977    0.3751
Pt    0.0477    0.7466    0.3956
Pt    0.2234    0.7222    0.3992
Pt    0.2237    0.6716    0.4491
Pt    0.1746    0.5003    0.4737
Pt    0.0442    0.5724    0.3738
Pt    0.1454    0.4995    0.4055
Pt    0.0475    0.5707    0.4227
Pt    0.2460    0.7482    0.4496
Pt    0.0413    0.6204    0.4198
Pt    0.0988    0.7277    0.3736
Pt    0.0450    0.6702    0.4211
Pt    0.0460    0.6752    0.4758
Pt    0.2235    0.7463    0.4746
Pt    0.0455    0.7227    0.4268
Pt    0.0492    0.7251    0.4705
Pt    0.2190    0.4986    0.4717
Pt    0.0981    0.5203    0.4265
Pt    0.1723    0.7462    0.4760
Pt    0.0982    0.5750    0.4192
Pt    0.1214    0.5478    0.3743
Pt    0.0956    0.6239    0.4246
Pt    0.0935    0.6236    0.4701
Pt    0.0701    0.5454    0.3736
Pt    0.0982    0.6746    0.4210
Pt    0.0931    0.6727    0.4712
Pt    0.1460    0.5766    0.3767
Pt    0.0968    0.7234    0.4232
Pt    0.0971    0.7210    0.4746
Pt    0.1986    0.7483    0.4516
Pt    0.1453    0.5263    0.4247
Pt    0.1463    0.5254    0.4755
Pt    0.2474    0.5980    0.3983
Pt    0.1439    0.5746    0.4269
Pt    0.1431    0.5707    0.4767
Pt    0.2466    0.7248    0.3747
Pt    0.1471    0.6234    0.4206
Pt    0.1435    0.6242    0.4757
Pt    0.1251    0.6492    0.3760
Pt    0.1433    0.6727    0.4203
Pt    0.1456    0.6728    0.4752
Pt    0.1445    0.5237    0.3733
Pt    0.1512    0.7236    0.4258
Pt    0.1468    0.7233    0.4762
Pt    0.1714    0.5984    0.3731
Pt    0.1993    0.5253    0.4233
Pt    0.1971    0.5295    0.4748
Pt    0.1990    0.4995    0.3988
Pt    0.1993    0.5735    0.4251
Pt    0.1998    0.5753    0.4756
Pt    0.2455    0.5480    0.4002
Pt    0.2011    0.6230    0.4237
Pt    0.1976    0.6222    0.4754
Pt    0.2468    0.7005    0.4466
Pt    0.1982    0.6723    0.4232
Pt    0.1965    0.6729    0.4736
Pt    0.1197    0.6799    0.3925
Pt    0.1992    0.7238    0.4250
Pt    0.1970    0.7195    0.4727
Pt    0.1226    0.7483    0.4269
Pt    0.0698    0.6005    0.4699
Pt    0.1211    0.6241    0.4458
Pt    0.2210    0.6730    0.3997
Pt    0.0166    0.6491    0.4223
Pt    0.2244    0.6206    0.4473
Pt    0.0257    0.6973    0.4207
Pt    0.0215    0.6970    0.4721
Pt    0.2235    0.6233    0.3962
Pt    0.2221    0.5763    0.4520
Pt    0.0708    0.5488    0.4214
Pt    0.2476    0.6979    0.4006
Pt    0.0716    0.5982    0.4213
Pt    0.2210    0.5747    0.3984
Pt    0.0715    0.6503    0.4247
Pt    0.0684    0.6481    0.4745
Pt    0.2212    0.5233    0.4478
Pt    0.0699    0.6974    0.4226
Pt    0.0705    0.6984    0.4715
Pt    0.2234    0.5242    0.3979
Pt    0.2474    0.6719    0.4241
Pt    0.1719    0.7215    0.4536
Pt    0.1208    0.5474    0.4236
Pt    0.1743    0.7253    0.4017
Pt    0.1210    0.5977    0.4245
Pt    0.1214    0.6002    0.4706
Pt    0.1230    0.4987    0.3766
Pt    0.1211    0.6488    0.4248
Pt    0.1187    0.6509    0.4716
Pt    0.1719    0.6725    0.4489
Pt    0.1243    0.6991    0.4212
Pt    0.1202    0.6958    0.4748
Pt    0.1736    0.6742    0.3979
Pt    0.1987    0.5024    0.4974
Pt    0.1213    0.5468    0.4716
Pt    0.1735    0.6253    0.4474
Pt    0.1730    0.5459    0.4242
Pt    0.1710    0.5535    0.4736
Pt    0.1730    0.6230    0.3991
Pt    0.1731    0.5984    0.4246
Pt    0.1684    0.5984    0.4762
Pt    0.1498    0.5025    0.4469
Pt    0.1738    0.6489    0.4253
Pt    0.1706    0.6477    0.4733
Pt    0.2467    0.6503    0.3947
Pt    0.1699    0.6962    0.4236
Pt    0.1721    0.6974    0.4762
Pt    0.1745    0.5241    0.3994
Pt    0.2447    0.5478    0.4481
Pt    0.1204    0.6757    0.4477
Pt    0.1734    0.5735    0.4461
Pt    0.2232    0.5501    0.4254
Pt    0.2231    0.5480    0.4762
Pt    0.1711    0.5735    0.4033
Pt    0.2228    0.5992    0.4230
Pt    0.2254    0.5987    0.4736
Pt    0.1225    0.7228    0.4485
Pt    0.2224    0.6468    0.4223
Pt    0.2225    0.6452    0.4729
Pt    0.1735    0.5253    0.4508
Pt    0.2251    0.6964    0.4260
Pt    0.2213    0.6970    0.4742
Pt    0.1275    0.7250    0.4016
Pt    0.0160    0.6240    0.3958
Pt    0.0210    0.6737    0.3969
Pt    0.0184    0.6775    0.4458
Pt    0.0233    0.7234    0.3979
Pt    0.0207    0.7235    0.4476
Pt    0.0714    0.5229    0.4015
Pt    0.0717    0.5714    0.3953
Pt    0.0686    0.5717    0.4481
Pt    0.0683    0.6241    0.3999
Pt    0.0702    0.6248    0.4469
Pt    0.0702    0.6716    0.3955
Pt    0.0713    0.6755    0.4485
Pt    0.0734    0.7254    0.3974
Pt    0.0722    0.7229    0.4457
Pt    0.1200    0.5254    0.4001
Pt    0.1247    0.5247    0.4480
Pt    0.1188    0.5786    0.3952
Pt    0.1176    0.5721    0.4478
Pt    0.1198    0.6243    0.4003
Pt    0.0949    0.6019    0.4952
Pt    0.1250    0.7477    0.3730
Pt    0.0215    0.7237    0.4947
Pt    0.0950    0.7476    0.4488
Pt    0.0948    0.6493    0.4957
Pt    0.1679    0.5501    0.3743
Pt    0.0461    0.7018    0.4967
Pt    0.0958    0.6950    0.4960
Pt    0.1181    0.7479    0.4747
Pt    0.1469    0.6237    0.3766
Pt    0.0989    0.6259    0.3730
Pt    0.2450    0.5763    0.4217
Pt    0.0970    0.5243    0.3749
Pt    0.2424    0.6725    0.4747
Pt    0.1166    0.5762    0.4932
Pt    0.0708    0.7249    0.4973
Pt    0.1528    0.7279    0.3778
Pt    0.2005    0.6474    0.4973
Pt    0.2224    0.6210    0.4971
Pt    0.1201    0.7247    0.4956
Pt    0.1976    0.7252    0.3738
Pt    0.0462    0.6743    0.3737
Pt    0.1419    0.6007    0.4973
Pt    0.1935    0.5957    0.4979
Pt    0.1725    0.5246    0.4976
Pt    0.1976    0.5249    0.3739
Pt    0.0730    0.6484    0.3744
Pt    0.0203    0.7005    0.3730
Pt    0.0205    0.5946    0.3730
Pt    0.2227    0.5749    0.4991
Pt    0.0217    0.5017    0.6175
Pt    0.2202    0.7241    0.5495
Pt    0.9992    0.5965    0.5963
Pt    0.2203    0.6730    0.5502
Pt    0.9990    0.6706    0.5201
Pt    0.2218    0.6729    0.5019
Pt    0.1972    0.5538    0.5023
Pt    0.9992    0.5028    0.5948
Pt    0.0492    0.6481    0.5953
Pt    0.9992    0.6713    0.5733
Pt    0.0461    0.6995    0.5446
Pt    0.0461    0.6949    0.5928
Pt    0.9988    0.5730    0.6212
Pt    0.2465    0.5978    0.5988
Pt    0.0973    0.6987    0.5502
Pt    0.0965    0.7012    0.5959
Pt    0.1969    0.7448    0.5016
Pt    0.2435    0.5247    0.6223
Pt    0.1456    0.5001    0.5937
Pt    0.1456    0.6471    0.5479
Pt    0.0987    0.5013    0.5928
Pt    0.1455    0.6975    0.5520
Pt    0.1497    0.6984    0.5991
Pt    0.2219    0.4985    0.5720
Pt    0.0700    0.7475    0.5727
Pt    0.0215    0.5718    0.5939
Pt    0.2222    0.7238    0.4980
Pt    0.1991    0.5491    0.5475
Pt    0.1937    0.5506    0.5969
Pt    0.9979    0.6971    0.5971
Pt    0.1957    0.6046    0.5512
Pt    0.1999    0.6039    0.6015
Pt    0.1972    0.7475    0.5526
Pt    0.1958    0.6485    0.5501
Pt    0.1184    0.5017    0.6179
Pt    0.1982    0.6988    0.5494
Pt    0.2450    0.7244    0.5248
Pt    0.2218    0.5273    0.4992
Pt    0.2260    0.6250    0.6005
Pt    0.2189    0.6244    0.5498
Pt    0.1182    0.6242    0.5019
Pt    0.2236    0.7473    0.5761
Pt    0.0475    0.6740    0.5224
Pt    0.0460    0.6703    0.5684
Pt    0.0477    0.7228    0.5221
Pt    0.0460    0.7222    0.5712
Pt    0.0974    0.6717    0.5259
Pt    0.0969    0.6762    0.5751
Pt    0.0960    0.7250    0.5257
Pt    0.0971    0.7264    0.5735
Pt    0.1415    0.6206    0.5241
Pt    0.1447    0.6710    0.5210
Pt    0.1454    0.6746    0.5770
Pt    0.1475    0.7217    0.5260
Pt    0.1500    0.7232    0.5764
Pt    0.1959    0.5238    0.5213
Pt    0.1961    0.5272    0.5705
Pt    0.1961    0.5758    0.5245
Pt    0.1957    0.5816    0.5765
Pt    0.1950    0.6225    0.5212
Pt    0.1971    0.6255    0.5771
Pt    0.1941    0.6723    0.5231
Pt    0.1936    0.6712    0.5738
Pt    0.1967    0.7211    0.5233
Pt    0.1981    0.7205    0.5760
Pt    0.0735    0.6517    0.6183
Pt    0.0237    0.6474    0.5711
Pt    0.0212    0.6984    0.5198
Pt    0.0215    0.6938    0.5719
Pt    0.0748    0.6978    0.5260
Pt    0.0692    0.6985    0.5675
Pt    0.1175    0.6460    0.5262
Pt    0.1203    0.6983    0.5222
Pt    0.1225    0.7010    0.5736
Pt    0.0206    0.7470    0.5216
Pt    0.9984    0.5497    0.5965
Pt    0.1725    0.5537    0.5251
Pt    0.1704    0.6015    0.5230
Pt    0.1699    0.6457    0.5229
Pt    0.1721    0.6964    0.5262
Pt    0.1721    0.6968    0.5719
Pt    0.2444    0.5751    0.5734
Pt    0.0989    0.7242    0.6211
Pt    0.2223    0.5483    0.5243
Pt    0.2222    0.5499    0.5744
Pt    0.2194    0.6006    0.5249
Pt    0.2217    0.6011    0.5761
Pt    0.2234    0.6472    0.5256
Pt    0.2230    0.6495    0.5784
Pt    0.2200    0.6985    0.5245
Pt    0.2238    0.6968    0.5768
Pt    0.0262    0.5296    0.5969
Pt    0.0275    0.6212    0.5958
Pt    0.0243    0.6701    0.5432
Pt    0.0236    0.6712    0.5960
Pt    0.1700    0.6711    0.4987
Pt    0.0206    0.7215    0.5451
Pt    0.0217    0.7210    0.5971
Pt    0.9982    0.6464    0.5436
Pt    0.0684    0.6693    0.5468
Pt    0.0738    0.6744    0.5963
Pt    0.0030    0.6249    0.5702
Pt    0.0711    0.7251    0.5448
Pt    0.0718    0.7221    0.5945
Pt    0.0718    0.6995    0.6197
Pt    0.1951    0.5015    0.5943
Pt    0.1220    0.6731    0.5470
Pt    0.1206    0.6768    0.5983
Pt    0.1178    0.6731    0.5001
Pt    0.1196    0.7238    0.5482
Pt    0.1229    0.7248    0.5991
Pt    0.1693    0.5003    0.5199
Pt    0.1716    0.5243    0.5430
Pt    0.1680    0.5249    0.5950
Pt    0.1717    0.7474    0.5748
Pt    0.0196    0.7476    0.6214
Pt    0.1704    0.6247    0.5527
Pt    0.0691    0.6778    0.5001
Pt    0.1682    0.6694    0.5474
Pt    0.2457    0.5764    0.5240
Pt    0.1712    0.7230    0.5499
Pt    0.1752    0.7255    0.6017
Pt    0.1977    0.5031    0.5477
Pt    0.2238    0.5238    0.5500
Pt    0.2222    0.5222    0.5965
Pt    0.0481    0.7261    0.6197
Pt    0.2181    0.5770    0.5519
Pt    0.2202    0.5755    0.5990
Pt    0.2458    0.6750    0.5793
Pt    0.1427    0.6454    0.5007
Pt    0.2465    0.6956    0.4998
Pt    0.9986    0.6462    0.5972
Pt    0.2470    0.6457    0.4987
Pt    0.9995    0.7226    0.5195
Pt    0.0236    0.5498    0.6208
Pt    0.9986    0.7197    0.5733
Pt    0.0470    0.6741    0.6224
Pt    0.1660    0.5748    0.5028
Pt    0.2471    0.5483    0.5979
Pt    0.0249    0.6413    0.6204
Pt    0.1237    0.7471    0.5728
Pt    0.2243    0.5014    0.5238
Pt    0.1685    0.5044    0.5693
Pt    0.0462    0.7481    0.5457
Pt    0.1979    0.6943    0.4997
Pt    0.1223    0.7452    0.5223
Pt    0.1721    0.7464    0.5261
Pt    0.9988    0.6193    0.6219
Pt    0.1703    0.5499    0.6201
Pt    0.0973    0.6761    0.6198
Pt    0.0452    0.4992    0.5927
Pt    0.1979    0.7470    0.5973
Pt    0.2465    0.6724    0.5256
Pt    0.0016    0.6941    0.5454
Pt    1.0000    0.6710    0.6211
Pt    0.1960    0.5753    0.6215
Pt    0.0251    0.5939    0.6171
Pt    0.2459    0.7015    0.5500
Pt    0.1963    0.5228    0.6178
Pt    0.1716    0.6243    0.4988
Pt    0.1458    0.6990    0.5023
Pt    0.2204    0.5494    0.6223
Pt    0.2459    0.6521    0.5550
Pt    0.0484    0.5234    0.6185
Pt    0.0742    0.4991    0.6188
Pt    0.0502    0.5724    0.6191
Pt    0.0535    0.6255    0.6168
Pt    0.1460    0.7452    0.5494
Pt    0.0223    0.7439    0.5714
Pt    0.1479    0.5228    0.6205
Pt    0.2473    0.6275    0.5298
Pt    0.2474    0.5529    0.5516
Pt    0.0229    0.6979    0.6222
Pt    0.9983    0.7218    0.6223
Pt    0.1276    0.7455    0.6228
Pt    0.1724    0.7227    0.4996
Pt    0.2182    0.5727    0.6976
Pt    0.2228    0.5738    0.6474
Pt    0.0489    0.7465    0.6471
Pt    0.2168    0.5237    0.6984
Pt    0.9998    0.6000    0.7433
Pt    0.2210    0.5238    0.6477
Pt    0.0002    0.5480    0.6954
Pt    0.9990    0.5239    0.6701
Pt    0.1440    0.4991    0.6450
Pt    0.9995    0.5189    0.7183
Pt    0.0715    0.5008    0.6672
Pt    0.0496    0.5456    0.6954
Pt    0.0547    0.6001    0.6349
Pt    0.0495    0.5985    0.6956
Pt    0.0510    0.6502    0.6461
Pt    0.0486    0.6497    0.6923
Pt    0.0478    0.7020    0.6492
Pt    0.0508    0.7012    0.6967
Pt    0.2472    0.5504    0.6975
Pt    0.1524    0.7243    0.6242
Pt    0.0933    0.5496    0.6969
Pt    0.0977    0.5996    0.6939
Pt    0.0993    0.6554    0.6453
Pt    0.1040    0.6499    0.6910
Pt    0.0983    0.6993    0.6449
Pt    0.9987    0.6498    0.6968
Pt    0.0781    0.7465    0.7249
Pt    0.1448    0.5519    0.6433
Pt    0.1440    0.5511    0.6927
Pt    0.1471    0.5988    0.6925
Pt    0.9998    0.6669    0.6704
Pt    0.0946    0.5480    0.6478
Pt    0.1959    0.5487    0.6453
Pt    0.1936    0.5485    0.6957
Pt    0.1708    0.5245    0.7466
Pt    0.9999    0.6953    0.6962
Pt    0.1712    0.5705    0.6925
Pt    0.2453    0.5466    0.6459
Pt    0.1251    0.6714    0.7432
Pt    0.1691    0.5739    0.6408
Pt    0.1656    0.5248    0.6963
Pt    0.0219    0.7223    0.7444
Pt    0.1717    0.5247    0.6434
Pt    0.1229    0.7231    0.6470
Pt    0.0783    0.6244    0.7445
Pt    0.0003    0.5718    0.6701
Pt    0.0011    0.5465    0.7422
Pt    0.1744    0.6211    0.7413
Pt    0.0479    0.5237    0.6660
Pt    0.0475    0.5241    0.7206
Pt    0.0520    0.5774    0.6696
Pt    0.0493    0.5735    0.7168
Pt    0.1464    0.4992    0.6985
Pt    0.0484    0.6237    0.6705
Pt    0.0528    0.6254    0.7185
Pt    0.0966    0.4985    0.6955
Pt    0.0491    0.6763    0.6716
Pt    0.0491    0.6754    0.7186
Pt    0.0243    0.5208    0.7438
Pt    0.0488    0.7293    0.6742
Pt    0.0474    0.7250    0.7220
Pt    0.0932    0.5237    0.6723
Pt    0.0965    0.5254    0.7183
Pt    0.1027    0.5817    0.6649
Pt    0.0952    0.5760    0.7216
Pt    0.0986    0.6285    0.6672
Pt    0.0998    0.6259    0.7184
Pt    0.0512    0.5508    0.6445
Pt    0.1042    0.6819    0.6740
Pt    0.0989    0.6709    0.7183
Pt    0.0234    0.6745    0.7449
Pt    0.0998    0.7246    0.6728
Pt    0.1034    0.7058    0.7006
Pt    0.9982    0.7258    0.6756
Pt    0.1442    0.5261    0.6715
Pt    0.1430    0.5281    0.7191
Pt    0.1469    0.5740    0.6686
Pt    0.1482    0.5754    0.7173
Pt    0.1468    0.6227    0.7209
Pt    0.2415    0.5249    0.6735
Pt    0.0245    0.4988    0.6657
Pt    0.1964    0.5244    0.6715
Pt    0.1935    0.5214    0.7208
Pt    0.1937    0.4987    0.6940
Pt    0.1950    0.5762    0.6647
Pt    0.1942    0.5740    0.7206
Pt    0.2215    0.5744    0.7469
Pt    0.9978    0.7225    0.7172
Pt    0.0255    0.5472    0.6687
Pt    0.0249    0.5515    0.7181
Pt    0.0277    0.5743    0.7446
Pt    0.0243    0.5983    0.6695
Pt    0.0238    0.5972    0.7176
Pt    0.1696    0.5013    0.6707
Pt    0.0232    0.6448    0.6696
Pt    0.0225    0.6494    0.7203
Pt    0.0513    0.6963    0.7474
Pt    0.0224    0.6989    0.6742
Pt    0.0247    0.6971    0.7173
Pt    0.0469    0.4999    0.6405
Pt    0.2425    0.5016    0.6964
Pt    0.1226    0.5026    0.6702
Pt    0.0725    0.5478    0.6701
Pt    0.0715    0.5478    0.7212
Pt    0.0717    0.6029    0.6631
Pt    0.0741    0.6009    0.7194
Pt    0.0728    0.5231    0.6415
Pt    0.0746    0.6544    0.6696
Pt    0.0739    0.6518    0.7169
Pt    0.1512    0.7474    0.6495
Pt    0.0751    0.7001    0.6708
Pt    0.0730    0.7010    0.7224
Pt    0.1203    0.5749    0.7466
Pt    0.1186    0.5250    0.6953
Pt    0.1479    0.5965    0.7441
Pt    0.1193    0.5523    0.6714
Pt    0.1212    0.5511    0.7203
Pt    0.1255    0.6083    0.6678
Pt    0.1221    0.5991    0.7188
Pt    0.1269    0.6514    0.7167
Pt    0.0226    0.5245    0.6428
Pt    0.2235    0.6003    0.6256
Pt    0.0519    0.6518    0.7423
Pt    0.0770    0.6723    0.7461
Pt    0.1174    0.5244    0.6450
Pt    0.1707    0.5472    0.6670
Pt    0.1721    0.5487    0.7224
Pt    0.1695    0.5984    0.7132
Pt    0.0748    0.7233    0.6994
Pt    0.0739    0.7231    0.6487
Pt    0.0769    0.6774    0.6944
Pt    0.1251    0.6264    0.6943
Pt    0.2233    0.5521    0.6743
Pt    0.2149    0.5483    0.7220
Pt    0.1197    0.5737    0.6954
Pt    0.0236    0.5207    0.6949
Pt    0.0268    0.5737    0.6469
Pt    0.0267    0.5742    0.6924
Pt    0.0264    0.6191    0.6425
Pt    0.0220    0.6226    0.6981
Pt    0.0242    0.6726    0.6477
Pt    0.0239    0.6720    0.6947
Pt    0.0222    0.7247    0.6478
Pt    0.0251    0.7263    0.6987
Pt    0.0686    0.5183    0.6945
Pt    0.0768    0.5761    0.6932
Pt    0.0769    0.6295    0.6427
Pt    0.0759    0.6258    0.6943
Pt    0.0733    0.6764    0.6446
Pt    0.1262    0.7009    0.6262
Pt    0.2003    0.6009    0.7419
Pt    0.1025    0.6980    0.7423
Pt    0.1211    0.5247    0.7445
Pt    0.1210    0.5004    0.7218
Pt    0.9990    0.6457    0.7457
Pt    0.9990    0.6724    0.7208
Pt    0.0470    0.5488    0.7458
Pt    0.1028    0.7462    0.6994
Pt    0.1020    0.6492    0.7435
Pt    0.1214    0.6208    0.7459
Pt    0.2435    0.5776    0.7195
Pt    0.1709    0.5724    0.7449
Pt    0.0271    0.6259    0.7415
Pt    0.1479    0.6462    0.7455
Pt    0.2431    0.5285    0.7259
Pt    0.2432    0.4983    0.6472
Pt    0.9992    0.6455    0.6452
Pt    0.0696    0.5755    0.7455
Pt    0.1456    0.5518    0.7438
Pt    0.0006    0.6983    0.6485
Pt    0.0971    0.5508    0.7457
Pt    0.0698    0.5237    0.7466
Pt    0.0498    0.6000    0.7423
Pt    0.1950    0.4999    0.7477
Pt    0.0534    0.7482    0.7479
Pt    0.1010    0.4992    0.7976
Pt    0.9986    0.5254    0.8205
Pt    0.2256    0.6705    0.8419
Pt    0.0009    0.6763    0.8203
Pt    0.0216    0.5025    0.8185
Pt    0.2234    0.6241    0.8476
Pt    0.0023    0.5002    0.8461
Pt    0.2213    0.5490    0.7739
Pt    0.2195    0.6226    0.7956
Pt    0.1501    0.5017    0.7999
Pt    0.0003    0.7220    0.7716
Pt    0.2226    0.5736    0.8493
Pt    0.2475    0.5963    0.8488
Pt    0.0000    0.5991    0.7975
Pt    0.1475    0.6254    0.8692
Pt    0.1995    0.4985    0.7958
Pt    0.9978    0.4996    0.7955
Pt    0.1229    0.6774    0.8468
Pt    0.1249    0.6747    0.7970
Pt    0.0460    0.5511    0.7964
Pt    0.0478    0.5487    0.8506
Pt    0.0038    0.5513    0.7965
Pt    0.0479    0.6044    0.7954
Pt    0.0501    0.5985    0.8477
Pt    0.1246    0.6261    0.8457
Pt    0.0479    0.6485    0.7938
Pt    0.0488    0.6511    0.8455
Pt    0.1240    0.6260    0.7946
Pt    0.0507    0.6982    0.7951
Pt    0.0460    0.6988    0.8450
Pt    0.1517    0.7235    0.8727
Pt    0.1683    0.5005    0.7725
Pt    0.1217    0.5728    0.8453
Pt    0.1267    0.5732    0.7968
Pt    0.0981    0.5436    0.7965
Pt    0.1016    0.5489    0.8477
Pt    0.0725    0.4992    0.8210
Pt    0.0989    0.5982    0.7990
Pt    0.0968    0.5946    0.8451
Pt    0.0757    0.6991    0.8702
Pt    0.1022    0.6505    0.7968
Pt    0.1011    0.6518    0.8436
Pt    0.0274    0.7473    0.7678
Pt    0.1027    0.6998    0.7970
Pt    0.0982    0.6991    0.8444
Pt    0.9984    0.6965    0.7484
Pt    0.2464    0.5743    0.7703
Pt    0.0008    0.5740    0.7716
Pt    0.1250    0.5181    0.8521
Pt    0.1471    0.5476    0.7976
Pt    0.1508    0.5456    0.8473
Pt    0.9999    0.5739    0.8222
Pt    0.1457    0.6001    0.8000
Pt    0.1508    0.5971    0.8470
Pt    0.9982    0.5220    0.7710
Pt    0.1531    0.6464    0.7965
Pt    0.1475    0.6523    0.8482
Pt    0.1523    0.6938    0.8495
Pt    0.1240    0.5226    0.7988
Pt    0.1943    0.5499    0.7507
Pt    0.2192    0.5251    0.7503
Pt    0.0721    0.7251    0.8447
Pt    0.1979    0.5492    0.7972
Pt    0.2002    0.5481    0.8498
Pt    0.0009    0.7260    0.8707
Pt    0.1976    0.5974    0.7988
Pt    0.1983    0.5979    0.8490
Pt    0.1904    0.6446    0.7951
Pt    0.2015    0.6448    0.8473
Pt    0.2023    0.6956    0.8464
Pt    0.2215    0.5519    0.8218
Pt    0.2210    0.5762    0.7929
Pt    0.0766    0.7248    0.7962
Pt    0.2252    0.6022    0.7689
Pt    0.2225    0.5229    0.8494
Pt    0.2235    0.5216    0.7997
Pt    0.1718    0.6469    0.8227
Pt    0.2460    0.6215    0.8719
Pt    0.1764    0.6712    0.8471
Pt    0.1254    0.5974    0.8698
Pt    0.0237    0.5261    0.7941
Pt    0.1733    0.6721    0.7937
Pt    0.0743    0.6496    0.8680
Pt    0.1286    0.6986    0.8227
Pt    0.0754    0.6724    0.8409
Pt    0.0492    0.5211    0.7711
Pt    0.0463    0.5254    0.8202
Pt    0.0262    0.5227    0.8464
Pt    0.0493    0.5751    0.7709
Pt    0.0507    0.5774    0.8201
Pt    0.1272    0.6518    0.8202
Pt    0.0492    0.6279    0.7682
Pt    0.0499    0.6271    0.8225
Pt    0.0024    0.6982    0.8462
Pt    0.0504    0.6721    0.7669
Pt    0.0497    0.6715    0.8181
Pt    0.1727    0.6441    0.7667
Pt    0.0503    0.7223    0.7719
Pt    0.0528    0.7279    0.8197
Pt    0.0732    0.6749    0.7939
Pt    0.0987    0.5209    0.7722
Pt    0.0983    0.5228    0.8238
Pt    0.2240    0.5986    0.8215
Pt    0.1007    0.5716    0.7774
Pt    0.0999    0.5697    0.8199
Pt    0.0778    0.6260    0.8437
Pt    0.0990    0.6227    0.7720
Pt    0.1017    0.6233    0.8194
Pt    0.0751    0.6239    0.7971
Pt    0.0995    0.6739    0.7688
Pt    0.1009    0.6750    0.8173
Pt    0.9982    0.5982    0.8472
Pt    0.1025    0.7211    0.7728
Pt    0.0983    0.7252    0.8229
Pt    0.0753    0.5711    0.8455
Pt    0.1464    0.5257    0.7702
Pt    0.1472    0.5220    0.8270
Pt    0.0705    0.5788    0.7965
Pt    0.1481    0.5734    0.7697
Pt    0.1495    0.5719    0.8217
Pt    0.0732    0.5191    0.8483
Pt    0.1465    0.6191    0.7717
Pt    0.1474    0.6231    0.8228
Pt    0.0713    0.5225    0.7949
Pt    0.1479    0.6730    0.7698
Pt    0.1529    0.6772    0.8199
Pt    0.0238    0.7251    0.8432
Pt    0.0253    0.7223    0.7949
Pt    0.1971    0.5257    0.7737
Pt    0.1997    0.5214    0.8249
Pt    0.0259    0.5000    0.7704
Pt    0.1964    0.5760    0.7695
Pt    0.1942    0.5729    0.8223
Pt    0.0231    0.6739    0.8473
Pt    0.2003    0.6194    0.7688
Pt    0.1957    0.6226    0.8211
Pt    0.0243    0.6761    0.7990
Pt    0.1975    0.6678    0.8214
Pt    0.2006    0.6727    0.8707
Pt    0.1233    0.6506    0.7702
Pt    0.1736    0.6241    0.8455
Pt    0.1731    0.6203    0.7969
Pt    0.0254    0.5493    0.7695
Pt    0.0254    0.5517    0.8214
Pt    0.1742    0.5996    0.8241
Pt    0.0240    0.5986    0.7680
Pt    0.0259    0.5984    0.8245
Pt    0.1707    0.5969    0.7681
Pt    0.0223    0.6512    0.7685
Pt    0.0209    0.6509    0.8232
Pt    0.2215    0.6452    0.8188
Pt    0.0245    0.6984    0.7710
Pt    0.0267    0.6999    0.8197
Pt    0.1753    0.5463    0.8240
Pt    0.0249    0.7479    0.8684
Pt    0.1716    0.5716    0.8460
Pt    0.1725    0.5745    0.7965
Pt    0.0741    0.5506    0.7723
Pt    0.0706    0.5494    0.8219
Pt    0.1702    0.5486    0.7736
Pt    0.0710    0.6003    0.7714
Pt    0.0731    0.6008    0.8220
Pt    0.0256    0.6233    0.8476
Pt    0.0753    0.6477    0.7720
Pt    0.0752    0.6482    0.8172
Pt    0.1266    0.7241    0.8483
Pt    0.0773    0.6991    0.7742
Pt    0.0731    0.6986    0.8205
Pt    0.0236    0.6233    0.8021
Pt    0.0249    0.5773    0.7954
Pt    0.1733    0.5232    0.8508
Pt    0.1746    0.5232    0.7975
Pt    0.1242    0.5480    0.7710
Pt    0.1243    0.5477    0.8225
Pt    0.0228    0.5752    0.8464
Pt    0.1230    0.5982    0.7717
Pt    0.1216    0.5981    0.8226
Pt    0.9988    0.6987    0.7944
Pt    0.1015    0.7250    0.8682
Pt    0.0020    0.7209    0.8224
Pt    0.2470    0.5474    0.8448
Pt    0.0472    0.6737    0.8706
Pt    0.2453    0.5255    0.7724
Pt    0.2472    0.5984    0.7963
Pt    0.0192    0.6472    0.8729
Pt    0.2458    0.5491    0.7937
Pt    0.1760    0.4994    0.8260
Pt    0.2458    0.5230    0.8234
Pt    0.0975    0.5975    0.7483
Pt    0.0795    0.7220    0.7493
Pt    0.0006    0.6227    0.7697
Pt    0.9978    0.6480    0.7982
Pt    0.0481    0.7249    0.8693
Pt    0.0795    0.5482    0.8699
Pt    0.0475    0.6256    0.8697
Pt    0.1746    0.5977    0.8719
Pt    0.0749    0.5998    0.8692
Pt    0.1478    0.5708    0.8713
Pt    0.1782    0.6992    0.8704
Pt    0.0977    0.6758    0.8699
Pt    0.0228    0.6997    0.8722
Pt    0.0997    0.5755    0.8717
Pt    0.0223    0.5491    0.8727
Pt    0.1026    0.6225    0.8727
Pt    0.9999    0.6758    0.8722
Pt    0.0494    0.5011    0.9502
Pt    0.2272    0.7257    0.9413
Pt    0.2254    0.7249    0.8953
Pt    0.0252    0.5949    0.8739
Pt    0.2239    0.6765    0.9447
Pt    0.2271    0.6743    0.8982
Pt    0.2224    0.6244    0.9505
Pt    0.2227    0.6218    0.9009
Pt    0.2240    0.5731    0.9507
Pt    0.2230    0.5678    0.8993
Pt    0.9991    0.5019    0.9482
Pt    0.0037    0.6210    0.9715
Pt    0.0500    0.5481    0.8956
Pt    0.0475    0.5487    0.9476
Pt    0.0528    0.6032    0.8913
Pt    0.0492    0.5980    0.9497
Pt    0.0483    0.6487    0.8951
Pt    0.0479    0.6490    0.9471
Pt    0.0496    0.6991    0.8930
Pt    0.0498    0.6992    0.9459
Pt    0.9980    0.5236    0.9752
Pt    0.9998    0.7252    0.9206
Pt    0.0993    0.5494    0.8984
Pt    0.0980    0.5518    0.9494
Pt    0.0970    0.5981    0.8966
Pt    0.1028    0.5972    0.9481
Pt    0.0968    0.6511    0.8969
Pt    0.1003    0.6504    0.9461
Pt    0.0984    0.7029    0.8939
Pt    0.0967    0.7001    0.9477
Pt    0.1497    0.6734    0.8744
Pt    0.9980    0.6483    0.8982
Pt    0.1519    0.5444    0.9024
Pt    0.1495    0.5451    0.9460
Pt    0.1490    0.5962    0.8922
Pt    0.1510    0.5966    0.9480
Pt    0.1488    0.6463    0.8975
Pt    0.1502    0.6467    0.9458
Pt    0.1525    0.6976    0.8967
Pt    0.1458    0.7021    0.9458
Pt    0.2247    0.5463    0.8732
Pt    0.1748    0.5721    0.8965
Pt    0.1976    0.5461    0.9018
Pt    0.2014    0.5481    0.9527
Pt    0.2036    0.5956    0.8989
Pt    0.1996    0.5954    0.9499
Pt    0.2027    0.6503    0.9007
Pt    0.2005    0.6524    0.9457
Pt    0.1970    0.6977    0.8958
Pt    0.1971    0.6956    0.9479
Pt    0.2203    0.5201    0.9516
Pt    0.0720    0.5004    0.9734
Pt    0.2221    0.5199    0.8990
Pt    0.1691    0.7282    0.9432
Pt    0.1782    0.7274    0.8947
Pt    0.1731    0.6750    0.9431
Pt    0.1760    0.6744    0.8949
Pt    0.1768    0.6211    0.9457
Pt    0.1743    0.6189    0.8935
Pt    0.1766    0.5724    0.9492
Pt    0.0472    0.5252    0.9216
Pt    0.0492    0.5266    0.9743
Pt    0.0517    0.5728    0.9219
Pt    0.0448    0.5696    0.9729
Pt    0.0508    0.6190    0.9209
Pt    0.0495    0.6225    0.9727
Pt    0.0491    0.6746    0.9218
Pt    0.0469    0.6703    0.9724
Pt    0.0509    0.7235    0.9190
Pt    0.0507    0.7229    0.9733
Pt    0.0970    0.5209    0.9209
Pt    0.0980    0.5227    0.9716
Pt    0.1002    0.5751    0.9233
Pt    0.1032    0.5739    0.9747
Pt    0.0979    0.6230    0.9196
Pt    0.0981    0.6232    0.9703
Pt    0.0985    0.6765    0.9204
Pt    0.0996    0.6746    0.9716
Pt    0.0989    0.7263    0.9171
Pt    0.0939    0.7244    0.9692
Pt    0.1497    0.5183    0.9247
Pt    0.1468    0.5201    0.9727
Pt    0.1498    0.5717    0.9239
Pt    0.1515    0.5748    0.9742
Pt    0.1496    0.6208    0.9225
Pt    0.1524    0.6228    0.9713
Pt    0.1479    0.6757    0.9220
Pt    0.1514    0.6734    0.9706
Pt    0.1481    0.7263    0.9185
Pt    0.1458    0.7270    0.9675
Pt    0.1965    0.5198    0.9245
Pt    0.1993    0.5202    0.9771
Pt    0.1989    0.5736    0.9262
Pt    0.2030    0.5743    0.9760
Pt    0.1950    0.6219    0.9191
Pt    0.1950    0.6268    0.9702
Pt    0.1999    0.6770    0.9208
Pt    0.1987    0.6740    0.9719
Pt    0.1991    0.7225    0.9219
Pt    0.1995    0.7263    0.9655
Pt    0.0538    0.5738    0.8734
Pt    0.0509    0.7469    0.9432
Pt    0.0240    0.5499    0.9245
Pt    0.0205    0.5485    0.9758
Pt    0.0260    0.5982    0.9219
Pt    0.0217    0.5938    0.9740
Pt    0.0219    0.6496    0.9209
Pt    0.0253    0.6454    0.9684
Pt    0.0253    0.6993    0.9214
Pt    0.0258    0.6964    0.9720
Pt    0.1725    0.5207    0.9481
Pt    0.1722    0.7276    0.9948
Pt    0.0763    0.5487    0.9219
Pt    0.0746    0.5466    0.9724
Pt    0.0741    0.5968    0.9252
Pt    0.0747    0.5971    0.9718
Pt    0.0742    0.6483    0.9219
Pt    0.0719    0.6482    0.9718
Pt    0.0748    0.6997    0.9203
Pt    0.0739    0.6974    0.9720
Pt    0.1744    0.5213    0.8996
Pt    0.1199    0.7267    0.9455
Pt    0.1234    0.5495    0.9236
Pt    0.1253    0.5482    0.9723
Pt    0.1253    0.5952    0.9219
Pt    0.1268    0.5979    0.9728
Pt    0.1227    0.6521    0.9193
Pt    0.1263    0.6485    0.9703
Pt    0.1219    0.7010    0.9222
Pt    0.1226    0.7012    0.9695
Pt    0.1243    0.7256    0.8924
Pt    0.1239    0.6747    0.9458
Pt    0.1755    0.5452    0.9238
Pt    0.1719    0.5485    0.9726
Pt    0.1724    0.5956    0.9211
Pt    0.1762    0.5968    0.9737
Pt    0.1735    0.6482    0.9185
Pt    0.1753    0.6506    0.9702
Pt    0.1729    0.7034    0.9230
Pt    0.1713    0.7019    0.9722
Pt    0.1250    0.6757    0.8979
Pt    0.0003    0.5959    0.9454
Pt    0.2228    0.5439    0.9247
Pt    0.2251    0.5460    0.9784
Pt    0.2259    0.5969    0.9275
Pt    0.2243    0.5994    0.9749
Pt    0.2258    0.6483    0.9226
Pt    0.2215    0.6506    0.9701
Pt    0.2248    0.7007    0.9191
Pt    0.2231    0.6980    0.9712
Pt    0.0202    0.5244    0.8962
Pt    0.0242    0.5244    0.9485
Pt    0.0261    0.5713    0.8973
Pt    0.0234    0.5742    0.9450
Pt    0.0231    0.6228    0.8992
Pt    0.0260    0.6216    0.9464
Pt    0.0253    0.6726    0.8942
Pt    0.0237    0.6735    0.9455
Pt    0.0239    0.7229    0.8951
Pt    0.0248    0.7231    0.9459
Pt    0.0739    0.5215    0.8982
Pt    0.0717    0.5259    0.9466
Pt    0.0764    0.5711    0.8978
Pt    0.0706    0.5731    0.9495
Pt    0.0732    0.6279    0.8927
Pt    0.0774    0.6244    0.9459
Pt    0.0701    0.6733    0.8952
Pt    0.0749    0.6715    0.9491
Pt    0.0743    0.7233    0.8932
Pt    0.0734    0.7256    0.9448
Pt    0.1238    0.5222    0.9006
Pt    0.1220    0.5227    0.9491
Pt    0.1280    0.5713    0.8971
Pt    0.1267    0.5729    0.9490
Pt    0.1248    0.6204    0.8969
Pt    0.1237    0.6258    0.9436
Pt    0.0002    0.7001    0.9469
Pt    0.9998    0.5492    0.9471
Pt    0.0995    0.4994    0.9477
Pt    0.0249    0.6712    0.9963
Pt    0.9978    0.6745    0.9219
Pt    0.9978    0.5251    0.9220
Pt    0.0719    0.4983    0.8735
Pt    0.0239    0.4988    0.9743
Pt    0.0251    0.5007    0.9241
Pt    0.2212    0.6981    0.8750
Pt    0.1492    0.5466    0.9957
Pt    0.1974    0.5222    0.8734
Pt    0.2467    0.5714    0.9263
Pt    0.1767    0.6250    0.9967
Pt    0.2238    0.6478    0.8755
Pt    0.1199    0.7231    0.9960
Pt    0.1002    0.5216    0.8749
Pt    0.0721    0.4989    0.9228
Pt    0.2465    0.7480    0.9947
Pt    0.1474    0.5216    0.8752
Pt    0.9996    0.7481    0.9962
Pt    0.9990    0.6738    0.9711
Pt    0.1276    0.6982    0.8734
Pt    0.1989    0.7020    0.9947
Pt    0.1747    0.6760    0.9978
Pt    0.9994    0.6202    0.8748
Pt    0.1991    0.5707    0.8732
Pt    0.9982    0.6490    0.9472
Pt    0.2218    0.6754    0.9977
Pt    0.0014    0.5959    0.8980
Pt    0.0236    0.7214    0.9952
Pt    0.1220    0.7479    0.9715
Pt    0.1241    0.6483    0.8742
Pt    0.2463    0.5975    0.8992
Pt    0.0954    0.7479    0.9950
Pt    0.0719    0.6728    0.9951
Pt    0.1233    0.5486    0.8738
Pt    0.2011    0.6253    0.8745
Pt    0.1987    0.6513    0.9955
Pt    0.1727    0.5451    0.8735
Pt    0.1264    0.6723    0.9976
Pt    0.0981    0.6982    0.9968
Pt    0.1007    0.6002    0.9966
Pt    0.9992    0.6984    0.8973
Pt    0.0998    0.6451    0.9942
Pt    0.0038    0.7482    0.9481
Pt    0.2462    0.7236    0.9718
Pt    0.0489    0.6962    0.9968
Pt    0.0481    0.7476    0.9960
Pt    0.2230    0.7469    0.9698
Pt    0.0001    0.6502    0.9958
Pt    0.0754    0.5250    0.9968
Pt    0.2451    0.5738    0.8743
Pt    0.1509    0.6481    0.9945
Pt    0.1265    0.6236    0.9938
Pt    0.0488    0.5248    0.8748
Pt    0.2222    0.6277    0.9945
Pt    0.1434    0.7004    0.9949
Pt    0.0492    0.5965    0.9968
Pt    0.0221    0.4989    0.8737
Pt    0.2475    0.7005    0.9463
Pt    0.0742    0.6235    0.9971
Pt    0.1227    0.5200    0.9969
Pt    0.2473    0.6511    0.9496
Pt    0.2470    0.5971    0.9499
Pt    0.2466    0.5234    0.9749
Pt    0.2476    0.5198    0.8741
Pt    0.9994    0.6980    0.9974
Pt    0.1971    0.5469    0.9975
Pt    0.9991    0.5994    0.9973
Pt    0.2219    0.4989    0.8738
Pt    0.1750    0.6473    0.8740
Pt    0.2245    0.5979    0.8729
Pt    0.2212    0.9757    0.0948
Pt    0.2234    0.9699    0.0440
Pt    0.0752    0.7484    0.0683
Pt    0.2202    0.9244    0.0983
Pt    0.2212    0.9258    0.0462
Pt    0.2434    0.8501    0.9982
Pt    0.2474    0.8995    0.0977
Pt    0.0004    0.8025    0.0480
Pt    0.1224    0.7536    0.0697
Pt    0.2224    0.8724    0.0990
Pt    0.1706    0.7497    0.0676
Pt    0.0488    0.7499    0.0975
Pt    0.0005    0.8986    0.1004
Pt    0.9996    0.8685    0.0756
Pt    0.0461    0.8022    0.0420
Pt    0.0491    0.7977    0.0986
Pt    0.0463    0.8516    0.0423
Pt    0.0508    0.8506    0.0961
Pt    0.0429    0.9043    0.0533
Pt    0.0432    0.9007    0.0946
Pt    0.0462    0.9494    0.0894
Pt    0.9985    0.8245    0.0710
Pt    0.2471    0.7972    0.0969
Pt    0.0231    0.7487    0.0219
Pt    0.1943    0.7526    0.0957
Pt    0.0933    0.7996    0.0445
Pt    0.0973    0.8023    0.0935
Pt    0.0647    0.9536    0.1178
Pt    0.0973    0.8524    0.0431
Pt    0.0952    0.8520    0.0944
Pt    0.0966    0.9002    0.0435
Pt    0.0966    0.9004    0.0947
Pt    0.0952    0.9505    0.1014
Pt    0.0286    0.9507    0.1182
Pt    0.0968    0.9228    0.1199
Pt    0.0941    0.8776    0.1191
Pt    0.0735    0.8488    0.1202
Pt    0.1439    0.8017    0.0463
Pt    0.1481    0.8019    0.0923
Pt    0.2244    0.7497    0.1183
Pt    0.1422    0.8530    0.0423
Pt    0.1442    0.8481    0.0953
Pt    0.9994    0.9481    0.1031
Pt    0.1448    0.9001    0.0466
Pt    0.1433    0.9000    0.0932
Pt    0.1463    0.9507    0.0419
Pt    0.1459    0.9500    0.0947
Pt    0.2216    0.7518    0.0192
Pt    0.0977    0.7501    0.0417
Pt    0.1721    0.7522    0.0194
Pt    0.1719    0.7796    0.0955
Pt    0.1986    0.7994    0.0467
Pt    0.2014    0.7982    0.0959
Pt    0.1727    0.8259    0.0954
Pt    0.1977    0.8485    0.0454
Pt    0.1959    0.8525    0.0958
Pt    0.1470    0.7507    0.0451
Pt    0.1931    0.9011    0.0460
Pt    0.2001    0.8966    0.0941
Pt    0.1445    0.9742    0.1210
Pt    0.1952    0.9478    0.0476
Pt    0.1977    0.9499    0.1002
Pt    0.2215    0.8716    0.0462
Pt    0.1702    0.9733    0.0957
Pt    0.0447    0.9248    0.1220
Pt    0.0006    0.7498    0.0471
Pt    0.1496    0.7506    0.0931
Pt    0.2236    0.8267    0.0970
Pt    0.0466    0.7737    0.0224
Pt    0.0483    0.7729    0.0731
Pt    0.0480    0.8281    0.0180
Pt    0.0496    0.8257    0.0673
Pt    0.0471    0.8764    0.0719
Pt    0.0281    0.9326    0.0666
Pt    0.0952    0.7753    0.0191
Pt    0.0961    0.7743    0.0682
Pt    0.0943    0.8243    0.0160
Pt    0.0943    0.8260    0.0703
Pt    0.0952    0.8786    0.0183
Pt    0.0958    0.8759    0.0682
Pt    0.0920    0.9288    0.0743
Pt    0.1468    0.7775    0.0196
Pt    0.1499    0.7766    0.0696
Pt    0.1461    0.8264    0.0158
Pt    0.1466    0.8268    0.0685
Pt    0.1423    0.8772    0.0152
Pt    0.1451    0.8764    0.0693
Pt    0.1460    0.9242    0.0241
Pt    0.1439    0.9283    0.0716
Pt    0.1429    0.9749    0.0715
Pt    0.1965    0.7788    0.0197
Pt    0.1987    0.7750    0.0700
Pt    0.1944    0.8246    0.0214
Pt    0.1986    0.8254    0.0697
Pt    0.1971    0.8748    0.0220
Pt    0.1949    0.8751    0.0692
Pt    0.1973    0.9222    0.0238
Pt    0.1957    0.9255    0.0720
Pt    0.1948    0.9728    0.0247
Pt    0.1939    0.9730    0.0670
Pt    0.2196    0.8734    0.9986
Pt    0.1665    0.8285    0.0406
Pt    0.0203    0.8013    0.0190
Pt    0.0231    0.7951    0.0720
Pt    0.0199    0.8503    0.0201
Pt    0.0274    0.8493    0.0734
Pt    0.0177    0.8988    0.0716
Pt    0.1965    0.7526    0.0426
Pt    0.0738    0.7517    0.1197
Pt    0.0732    0.8015    0.1215
Pt    0.2459    0.9981    0.0966
Pt    0.0698    0.8017    0.0194
Pt    0.0705    0.8002    0.0700
Pt    0.0736    0.8529    0.0203
Pt    0.0690    0.8507    0.0661
Pt    0.0695    0.9006    0.0702
Pt    0.1677    0.9758    0.0444
Pt    0.1751    0.8985    0.1213
Pt    0.1211    0.8029    0.0172
Pt    0.1197    0.7998    0.0661
Pt    0.1185    0.8510    0.0187
Pt    0.1214    0.8505    0.0680
Pt    0.1186    0.9042    0.0172
Pt    0.1166    0.9045    0.0705
Pt    0.1168    0.9492    0.0702
Pt    0.2235    0.8257    0.0471
Pt    0.1692    0.9275    0.0933
Pt    0.1728    0.8018    0.0221
Pt    0.1709    0.8018    0.0701
Pt    0.1723    0.8494    0.0178
Pt    0.1725    0.8483    0.0683
Pt    0.1670    0.8977    0.0190
Pt    0.1694    0.9002    0.0734
Pt    0.1715    0.9482    0.0225
Pt    0.1680    0.9504    0.0702
Pt    0.2243    0.7742    0.0966
Pt    0.2245    0.7728    0.0445
Pt    0.2201    0.8019    0.0191
Pt    0.2237    0.7990    0.0724
Pt    0.2176    0.8461    0.0215
Pt    0.2208    0.8512    0.0734
Pt    0.2223    0.8966    0.0252
Pt    0.2230    0.8973    0.0666
Pt    0.2196    0.9489    0.0197
Pt    0.2227    0.9497    0.0736
Pt    0.1680    0.9243    0.0475
Pt    0.0222    0.7771    0.0441
Pt    0.0235    0.7719    0.0990
Pt    0.0984    0.7528    0.0957
Pt    0.0222    0.8269    0.0418
Pt    0.0265    0.8258    0.0935
Pt    0.0206    0.8723    0.0481
Pt    0.0259    0.8734    0.0974
Pt    0.1463    0.7737    0.1187
Pt    0.0221    0.9246    0.1001
Pt    0.1443    0.9236    0.1168
Pt    0.1735    0.8749    0.0955
Pt    0.0719    0.7721    0.0452
Pt    0.0748    0.7745    0.0943
Pt    0.9992    0.8466    0.0983
Pt    0.0700    0.8270    0.0408
Pt    0.0708    0.8222    0.0952
Pt    0.0655    0.8798    0.0454
Pt    0.0732    0.8767    0.0940
Pt    0.0603    0.9354    0.0644
Pt    0.0712    0.9249    0.0982
Pt    0.1695    0.8710    0.0456
Pt    0.1204    0.7759    0.0422
Pt    0.1235    0.7770    0.0946
Pt    0.1744    0.7758    0.0470
Pt    0.1205    0.8261    0.0433
Pt    0.1204    0.8259    0.0908
Pt    0.1229    0.9741    0.0966
Pt    0.1204    0.8783    0.0458
Pt    0.1203    0.8746    0.0931
Pt    0.1195    0.9258    0.0443
Pt    0.1201    0.9252    0.0943
Pt    0.1963    0.9236    0.1213
Pt    0.1972    0.9973    0.0955
Pt    0.2460    0.8248    0.0718
Pt    0.2437    0.7981    0.0435
Pt    0.2463    0.9734    0.0202
Pt    0.0685    0.8973    0.1200
Pt    0.2468    0.7762    0.0709
Pt    0.1213    0.8517    0.1200
Pt    0.1445    0.8241    0.1208
Pt    0.2468    0.9489    0.0975
Pt    0.2472    0.9262    0.1217
Pt    0.9986    0.7751    0.0230
Pt    0.0964    0.7787    0.1194
Pt    0.9989    0.7720    0.0729
Pt    0.2473    0.8504    0.0983
Pt    0.2462    0.8776    0.1217
Pt    0.1730    0.8497    0.1210
Pt    0.1202    0.8998    0.1218
Pt    0.2471    0.9262    0.0706
Pt    0.2189    0.9962    0.0220
Pt    0.1185    0.9501    0.1217
Pt    0.1461    0.8752    0.1178
Pt    0.1697    0.9506    0.1217
Pt    0.1018    0.8238    0.1206
Pt    0.1264    0.7983    0.1188
Pt    0.0010    0.7986    0.0963
Pt    0.0031    0.8718    0.1227
Pt    0.1994    0.7738    0.1211
Pt    0.1741    0.7513    0.1215
Pt    0.1970    0.8729    0.1219
Pt    0.1202    0.7541    0.1221
Pt    0.2445    0.9737    0.1205
Pt    0.0247    0.8477    0.1209
Pt    0.1760    0.8001    0.1198
Pt    0.1980    0.8252    0.1176
Pt    0.2222    0.9720    0.1980
Pt    0.2192    0.9726    0.1473
Pt    0.2221    0.9242    0.1936
Pt    0.2211    0.9254    0.1456
Pt    0.9984    0.8218    0.1766
Pt    0.2278    0.8762    0.1952
Pt    0.1485    0.7501    0.2477
Pt    0.2202    0.8726    0.1453
Pt    0.9989    0.7981    0.1999
Pt    0.2226    0.8253    0.1982
Pt    0.0708    0.7515    0.2238
Pt    0.9988    0.9235    0.1272
Pt    0.0484    0.7984    0.1508
Pt    0.0510    0.7996    0.1992
Pt    0.0448    0.8474    0.1524
Pt    0.0482    0.8462    0.2019
Pt    0.0472    0.8952    0.1468
Pt    0.0490    0.8983    0.1975
Pt    0.0488    0.9500    0.1466
Pt    0.0470    0.9504    0.1949
Pt    0.1462    0.7519    0.1449
Pt    0.9977    0.8458    0.1482
Pt    0.0989    0.8006    0.1477
Pt    0.0992    0.7975    0.1986
Pt    0.0967    0.8488    0.1465
Pt    0.0996    0.8483    0.1977
Pt    0.0939    0.8983    0.1456
Pt    0.0971    0.8989    0.1972
Pt    0.0950    0.9474    0.1463
Pt    0.0974    0.9478    0.1973
Pt    0.1717    0.8240    0.1977
Pt    0.1776    0.8215    0.1463
Pt    0.1486    0.7973    0.1427
Pt    0.1458    0.8028    0.1986
Pt    0.1447    0.8502    0.1419
Pt    0.1461    0.8498    0.1965
Pt    0.1438    0.8985    0.1428
Pt    0.1456    0.8998    0.1980
Pt    0.1426    0.9489    0.1428
Pt    0.1440    0.9477    0.1984
Pt    0.1688    0.7762    0.1987
Pt    0.1706    0.7492    0.1708
Pt    0.1994    0.7987    0.1481
Pt    0.1984    0.8002    0.1985
Pt    0.1953    0.8474    0.1478
Pt    0.1963    0.8517    0.1966
Pt    0.1947    0.8983    0.1467
Pt    0.1961    0.8985    0.1966
Pt    0.1963    0.9457    0.1458
Pt    0.1975    0.9488    0.1965
Pt    0.2231    0.8242    0.1480
Pt    0.2243    0.7728    0.1995
Pt    0.2206    0.7737    0.1458
Pt    0.9978    0.9495    0.1486
Pt    0.2226    0.8988    0.1252
Pt    0.1697    0.9713    0.2000
Pt    0.0957    0.7518    0.1437
Pt    0.0487    0.7501    0.1475
Pt    0.1731    0.9699    0.1489
Pt    0.0992    0.7501    0.2470
Pt    0.1729    0.9237    0.2011
Pt    0.1685    0.9239    0.1428
Pt    0.1718    0.8754    0.1970
Pt    0.1711    0.8732    0.1470
Pt    0.0473    0.8713    0.1235
Pt    0.0485    0.7761    0.1719
Pt    0.0483    0.7722    0.2210
Pt    0.9987    0.7753    0.1230
Pt    0.0500    0.8235    0.1771
Pt    0.0463    0.8212    0.2263
Pt    0.0460    0.7498    0.2469
Pt    0.0475    0.8754    0.1744
Pt    0.0477    0.8740    0.2203
Pt    0.2203    0.9981    0.2235
Pt    0.0508    0.9244    0.1689
Pt    0.0479    0.9251    0.2212
Pt    0.0462    0.9763    0.1710
Pt    0.0497    0.9711    0.2222
Pt    0.1226    0.7498    0.1727
Pt    0.1001    0.7745    0.1712
Pt    0.1004    0.7748    0.2236
Pt    0.0512    0.8261    0.1237
Pt    0.1001    0.8234    0.1712
Pt    0.0979    0.8248    0.2210
Pt    0.0748    0.7741    0.1991
Pt    0.0990    0.8744    0.1750
Pt    0.0972    0.8745    0.2215
Pt    0.9980    0.9228    0.1723
Pt    0.0960    0.9259    0.1732
Pt    0.0973    0.9231    0.2229
Pt    0.0023    0.8199    0.1234
Pt    0.0974    0.9759    0.1714
Pt    0.0971    0.9770    0.2228
Pt    0.0735    0.7775    0.1452
Pt    0.1479    0.7749    0.1695
Pt    0.1457    0.7790    0.2200
Pt    0.0205    0.9736    0.1957
Pt    0.1500    0.8213    0.1686
Pt    0.1486    0.8266    0.2228
Pt    0.0007    0.8972    0.1503
Pt    0.1463    0.8729    0.1682
Pt    0.1443    0.8733    0.2241
Pt    0.0251    0.9694    0.1469
Pt    0.1472    0.9240    0.1744
Pt    0.1458    0.9223    0.2250
Pt    0.2457    0.9236    0.2240
Pt    0.1464    0.9733    0.1737
Pt    0.1485    0.9715    0.2244
Pt    0.2470    0.9476    0.1951
Pt    0.1951    0.7757    0.1709
Pt    0.1985    0.7740    0.2219
Pt    0.0218    0.9231    0.1975
Pt    0.1994    0.8277    0.1729
Pt    0.1948    0.8219    0.2252
Pt    0.2466    0.9977    0.1981
Pt    0.1939    0.8743    0.1713
Pt    0.1972    0.8725    0.2233
Pt    0.0232    0.9222    0.1472
Pt    0.1948    0.9234    0.1692
Pt    0.1988    0.9221    0.2235
Pt    0.0734    0.7520    0.1712
Pt    0.1977    0.9749    0.1703
Pt    0.1977    0.9728    0.2230
Pt    0.1743    0.7734    0.1445
Pt    0.1198    0.9742    0.1980
Pt    0.1220    0.9750    0.1469
Pt    0.0195    0.8762    0.1972
Pt    0.0225    0.7991    0.1761
Pt    0.0248    0.7973    0.2241
Pt    0.0224    0.8709    0.1512
Pt    0.0250    0.8462    0.1777
Pt    0.0249    0.8511    0.2245
Pt    0.0199    0.8221    0.2013
Pt    0.0249    0.8984    0.1723
Pt    0.0215    0.9004    0.2225
Pt    0.1228    0.9751    0.2466
Pt    0.0241    0.9452    0.1721
Pt    0.0215    0.9496    0.2241
Pt    0.1215    0.9237    0.1976
Pt    0.1196    0.9230    0.1469
Pt    0.1243    0.8746    0.1981
Pt    0.2233    0.8012    0.1231
Pt    0.0739    0.8004    0.1710
Pt    0.0746    0.7979    0.2237
Pt    0.2212    0.9494    0.1240
Pt    0.0740    0.8483    0.1748
Pt    0.0713    0.8515    0.2232
Pt    0.1929    0.7516    0.1953
Pt    0.0736    0.8979    0.1725
Pt    0.0728    0.9006    0.2220
Pt    0.0480    0.7749    0.1249
Pt    0.0724    0.9494    0.1715
Pt    0.0750    0.9490    0.2234
Pt    0.1195    0.8721    0.1485
Pt    0.1212    0.8267    0.1979
Pt    0.1245    0.8213    0.1460
Pt    0.0226    0.8217    0.1493
Pt    0.1243    0.8006    0.1723
Pt    0.1235    0.8018    0.2260
Pt    0.0677    0.9236    0.1437
Pt    0.1240    0.8478    0.1729
Pt    0.1218    0.8499    0.2251
Pt    0.0730    0.8732    0.1962
Pt    0.1188    0.8999    0.1712
Pt    0.1220    0.8978    0.2233
Pt    0.0726    0.8711    0.1462
Pt    0.1221    0.9493    0.1721
Pt    0.1211    0.9495    0.2203
Pt    0.1251    0.7756    0.1956
Pt    0.1240    0.7749    0.1476
Pt    0.0747    0.9743    0.1958
Pt    0.0467    0.9004    0.2471
Pt    0.1733    0.7971    0.1704
Pt    0.1729    0.7976    0.2248
Pt    0.2458    0.9732    0.2197
Pt    0.1717    0.8484    0.1700
Pt    0.1727    0.8491    0.2246
Pt    0.2217    0.7502    0.1728
Pt    0.1674    0.8978    0.1710
Pt    0.1710    0.8968    0.2237
Pt    0.0771    0.8222    0.1979
Pt    0.1712    0.9470    0.1730
Pt    0.1714    0.9470    0.2242
Pt    0.0695    0.9739    0.1491
Pt    0.0715    0.9257    0.1989
Pt    0.1493    0.7506    0.1988
Pt    0.0721    0.8254    0.1489
Pt    0.2214    0.7997    0.1734
Pt    0.2222    0.8007    0.2227
Pt    0.0213    0.7731    0.1971
Pt    0.2247    0.8508    0.1712
Pt    0.2203    0.8491    0.2217
Pt    0.0221    0.7723    0.1488
Pt    0.2223    0.8984    0.1699
Pt    0.2203    0.8969    0.2226
Pt    0.0258    0.7974    0.1264
Pt    0.2203    0.9475    0.1713
Pt    0.2220    0.9456    0.2195
Pt    0.1240    0.7489    0.2213
Pt    0.9982    0.7493    0.1979
Pt    0.9980    0.8714    0.1733
Pt    0.0457    0.9484    0.2465
Pt    0.2454    0.9964    0.1488
Pt    0.1727    0.9980    0.2220
Pt    0.1751    0.9717    0.2471
Pt    0.0241    0.8991    0.1241
Pt    0.0505    0.7492    0.1963
Pt    0.0227    0.7496    0.1231
Pt    0.1461    0.8478    0.2476
Pt    0.2477    0.8513    0.1447
Pt    0.2468    0.9718    0.1725
Pt    0.1970    0.9954    0.1986
Pt    0.9981    0.9751    0.1242
Pt    0.2438    0.7738    0.1740
Pt    0.2470    0.9501    0.1490
Pt    0.2459    0.8253    0.2260
Pt    0.2472    0.9029    0.2001
Pt    0.2455    0.8242    0.1750
Pt    0.0237    0.9981    0.2228
Pt    0.0956    0.9741    0.1260
Pt    0.2471    0.8757    0.1697
Pt    0.2471    0.7999    0.2475
Pt    0.2473    0.8744    0.2273
Pt    0.2213    0.8488    0.1238
Pt    0.0740    0.7734    0.2471
Pt    0.9984    0.9268    0.2214
Pt    0.0981    0.8002    0.2454
Pt    0.0212    0.8229    0.2457
Pt    0.2451    0.9007    0.2472
Pt    0.0491    0.8499    0.2472
Pt    0.1970    0.9487    0.2463
Pt    0.2228    0.7724    0.2456
Pt    0.0250    0.7747    0.2449
Pt    0.1978    0.8480    0.2476
Pt    0.1963    0.9968    0.2476
Pt    0.1219    0.8247    0.2475
Pt    0.1958    0.9760    0.1234
Pt    0.2243    0.9760    0.3450
Pt    0.2220    0.9748    0.2972
Pt    0.2457    0.9002    0.3024
Pt    0.2240    0.9255    0.3508
Pt    0.2218    0.9246    0.3012
Pt    0.1777    0.7491    0.2718
Pt    0.2197    0.8712    0.3486
Pt    0.2264    0.8731    0.3014
Pt    0.0207    0.9010    0.3705
Pt    0.2218    0.8244    0.2489
Pt    0.2233    0.8227    0.3499
Pt    0.1505    0.7491    0.2993
Pt    0.2244    0.8246    0.2946
Pt    0.0734    0.7505    0.3210
Pt    0.0241    0.9306    0.3481
Pt    0.2010    0.7492    0.2971
Pt    0.0190    0.9258    0.2955
Pt    0.1245    0.9737    0.3473
Pt    0.0226    0.8744    0.3462
Pt    0.0468    0.7988    0.2971
Pt    0.0429    0.7971    0.3468
Pt    0.1730    0.8248    0.2489
Pt    0.0478    0.8502    0.2976
Pt    0.0493    0.8488    0.3488
Pt    0.2272    0.7493    0.2756
Pt    0.0443    0.9008    0.2987
Pt    0.0493    0.8983    0.3468
Pt    0.0227    0.8735    0.2986
Pt    0.0456    0.9502    0.2938
Pt    0.0489    0.9521    0.3419
Pt    0.0178    0.9735    0.2971
Pt    0.0983    0.8982    0.2499
Pt    0.1240    0.7526    0.2733
Pt    0.0746    0.7488    0.2716
Pt    0.0978    0.8008    0.3003
Pt    0.0993    0.7982    0.3473
Pt    0.1234    0.8235    0.3014
Pt    0.0962    0.8470    0.2991
Pt    0.0953    0.8501    0.3493
Pt    0.1211    0.9262    0.3484
Pt    0.0974    0.8956    0.2962
Pt    0.0955    0.8990    0.3497
Pt    0.1253    0.7731    0.3499
Pt    0.1001    0.9502    0.2961
Pt    0.0954    0.9508    0.3488
Pt    0.1209    0.8709    0.2981
Pt    0.0224    0.9727    0.3439
Pt    0.1242    0.8495    0.3700
Pt    0.1232    0.7769    0.2977
Pt    0.1495    0.7995    0.2987
Pt    0.1494    0.7978    0.3476
Pt    0.1228    0.8226    0.3521
Pt    0.1490    0.8481    0.2999
Pt    0.1505    0.8475    0.3485
Pt    0.0721    0.9753    0.3464
Pt    0.1463    0.8966    0.2977
Pt    0.1454    0.8995    0.3498
Pt    0.0746    0.9732    0.2931
Pt    0.1489    0.9468    0.2976
Pt    0.1475    0.9496    0.3446
Pt    0.0976    0.7514    0.2959
Pt    0.0233    0.7492    0.3186
Pt    0.0698    0.9253    0.3439
Pt    0.0725    0.9214    0.2987
Pt    0.2004    0.8005    0.2976
Pt    0.1968    0.7997    0.3487
Pt    0.1233    0.9760    0.2967
Pt    0.2008    0.8482    0.2973
Pt    0.1961    0.8479    0.3498
Pt    0.0724    0.8731    0.3484
Pt    0.1995    0.8988    0.2986
Pt    0.1974    0.9009    0.3472
Pt    0.1999    0.7492    0.3459
Pt    0.1964    0.9479    0.2978
Pt    0.1996    0.9500    0.3478
Pt    0.1714    0.9224    0.3469
Pt    0.2257    0.7735    0.3496
Pt    0.2252    0.7735    0.2989
Pt    0.0704    0.8735    0.3001
Pt    0.1743    0.9719    0.3468
Pt    0.0717    0.8215    0.3501
Pt    0.1730    0.9743    0.2977
Pt    0.0234    0.8256    0.3484
Pt    0.1742    0.9186    0.3018
Pt    0.0686    0.8255    0.2981
Pt    0.0501    0.7729    0.2725
Pt    0.0480    0.7743    0.3214
Pt    0.0451    0.8217    0.2740
Pt    0.0474    0.8202    0.3239
Pt    0.0477    0.8740    0.2718
Pt    0.0465    0.8732    0.3236
Pt    0.0450    0.9234    0.2720
Pt    0.0460    0.9263    0.3207
Pt    0.0445    0.9754    0.2692
Pt    0.0484    0.9747    0.3160
Pt    0.0980    0.7759    0.2736
Pt    0.0973    0.7752    0.3232
Pt    0.0981    0.8226    0.2745
Pt    0.0957    0.8237    0.3254
Pt    0.0993    0.8706    0.2728
Pt    0.0944    0.8724    0.3236
Pt    0.0945    0.9223    0.2740
Pt    0.0983    0.9249    0.3227
Pt    0.1014    0.9738    0.2706
Pt    0.0977    0.9751    0.3216
Pt    0.1487    0.7717    0.2754
Pt    0.1488    0.7727    0.3212
Pt    0.1487    0.8224    0.2745
Pt    0.1509    0.8230    0.3241
Pt    0.1453    0.8680    0.2756
Pt    0.1447    0.8721    0.3228
Pt    0.1497    0.9240    0.2754
Pt    0.1478    0.9234    0.3244
Pt    0.1461    0.9708    0.2736
Pt    0.1482    0.9755    0.3193
Pt    0.2007    0.7729    0.2722
Pt    0.2010    0.7760    0.3235
Pt    0.1983    0.8236    0.2722
Pt    0.2018    0.8250    0.3217
Pt    0.1953    0.8738    0.2726
Pt    0.1954    0.8748    0.3229
Pt    0.1968    0.9262    0.2741
Pt    0.2025    0.9267    0.3245
Pt    0.1981    0.9732    0.2730
Pt    0.1963    0.9774    0.3202
Pt    0.0219    0.7488    0.2728
Pt    0.1740    0.8742    0.3486
Pt    0.0195    0.7975    0.2759
Pt    0.0183    0.8003    0.3234
Pt    0.0213    0.8489    0.2725
Pt    0.0242    0.8477    0.3217
Pt    0.0197    0.8985    0.2733
Pt    0.0241    0.9027    0.3258
Pt    0.0207    0.9509    0.2727
Pt    0.0235    0.9488    0.3205
Pt    0.1714    0.8734    0.2987
Pt    0.0756    0.7737    0.3479
Pt    0.0746    0.8001    0.2741
Pt    0.0716    0.7984    0.3237
Pt    0.0717    0.8490    0.2738
Pt    0.0702    0.8467    0.3243
Pt    0.0728    0.8973    0.2734
Pt    0.0715    0.8991    0.3231
Pt    0.0677    0.9482    0.2710
Pt    0.0758    0.9482    0.3207
Pt    0.1742    0.8234    0.3485
Pt    0.1733    0.8220    0.2987
Pt    0.1214    0.7998    0.2731
Pt    0.1250    0.7983    0.3241
Pt    0.1219    0.8466    0.2722
Pt    0.1227    0.8471    0.3272
Pt    0.1241    0.8961    0.2738
Pt    0.1223    0.8960    0.3218
Pt    0.1238    0.9447    0.2714
Pt    0.1212    0.9515    0.3225
Pt    0.1221    0.9224    0.2958
Pt    0.1225    0.8737    0.3491
Pt    0.1744    0.7992    0.2739
Pt    0.1762    0.7982    0.3216
Pt    0.1746    0.8471    0.2750
Pt    0.1743    0.8480    0.3215
Pt    0.1715    0.8999    0.2740
Pt    0.1722    0.8976    0.3251
Pt    0.1723    0.9486    0.2735
Pt    0.1749    0.9503    0.3240
Pt    0.0719    0.7754    0.2969
Pt    0.1747    0.7732    0.3457
Pt    0.2223    0.7978    0.2745
Pt    0.2252    0.8001    0.3223
Pt    0.2275    0.8538    0.2732
Pt    0.2230    0.8496    0.3238
Pt    0.2203    0.9017    0.2724
Pt    0.2236    0.8971    0.3246
Pt    0.2242    0.9487    0.2742
Pt    0.2248    0.9513    0.3222
Pt    0.1762    0.7733    0.2998
Pt    0.0217    0.7758    0.3005
Pt    0.0201    0.7705    0.3454
Pt    0.1214    0.7532    0.3222
Pt    0.0201    0.8249    0.2961
Pt    0.1494    0.7983    0.2512
Pt    0.0709    0.8755    0.2480
Pt    0.9994    0.9963    0.3470
Pt    0.2470    0.8791    0.2731
Pt    0.0742    0.9218    0.2498
Pt    0.0428    0.9962    0.2936
Pt    0.9999    0.9743    0.3724
Pt    0.1478    0.8980    0.2492
Pt    0.2227    0.9243    0.2493
Pt    0.1741    0.9243    0.2486
Pt    0.9983    0.8719    0.3215
Pt    0.1748    0.9001    0.3719
Pt    0.0992    0.7494    0.3487
Pt    0.0231    0.8764    0.2485
Pt    0.0740    0.9955    0.2707
Pt    0.0960    0.9269    0.3711
Pt    0.2473    0.9283    0.2751
Pt    0.0489    0.7970    0.2510
Pt    0.0216    0.9959    0.3216
Pt    0.1973    0.8731    0.3726
Pt    0.0926    0.8496    0.2482
Pt    0.2216    0.9740    0.2486
Pt    0.1481    0.9482    0.2493
Pt    0.1716    0.9952    0.2720
Pt    0.0471    0.9978    0.3496
Pt    0.1215    0.9217    0.2487
Pt    0.0014    0.8463    0.3460
Pt    0.0196    0.9249    0.2486
Pt    0.1493    0.8750    0.3722
Pt    0.1749    0.9497    0.3717
Pt    0.1692    0.8716    0.2513
Pt    0.1477    0.9967    0.2495
Pt    0.2475    0.9273    0.3236
Pt    0.1720    0.9973    0.3702
Pt    0.1473    0.9248    0.3717
Pt    0.2205    0.8723    0.2486
Pt    0.1739    0.7736    0.2479
Pt    0.2468    0.9768    0.2730
Pt    0.0501    0.7738    0.3721
Pt    0.0679    0.9502    0.3694
Pt    0.0192    0.9723    0.2496
Pt    0.1984    0.7752    0.3715
Pt    0.0449    0.9733    0.3717
Pt    0.0459    0.9236    0.3707
Pt    0.2006    0.9253    0.3716
Pt    0.9995    0.8742    0.3722
Pt    0.0209    0.7974    0.3695
Pt    0.0991    0.8226    0.3729
Pt    0.1993    0.7962    0.2480
Pt    0.1986    0.9753    0.3710
Pt    0.2231    0.8461    0.3720
Pt    0.2214    0.9531    0.3701
Pt    0.1005    0.9465    0.2481
Pt    0.1240    0.7741    0.2484
Pt    0.0726    0.8484    0.3727
Pt    0.2250    0.9014    0.3724
Pt    0.9977    0.7982    0.2490
Pt    0.0723    0.8230    0.2486
Pt    0.1236    0.8734    0.2484
Pt    0.0739    0.9727    0.2485
Pt    0.1975    0.8980    0.2481
Pt    0.2243    0.9724    0.4473
Pt    0.2228    0.9725    0.4002
Pt    0.0494    0.9975    0.3975
Pt    0.1466    0.9757    0.3739
Pt    0.1237    0.7706    0.4004
Pt    0.0709    0.8273    0.4950
Pt    0.0996    0.7487    0.3988
Pt    0.0737    0.7490    0.3751
Pt    0.0742    0.9740    0.4471
Pt    0.2260    0.9256    0.4485
Pt    0.0713    0.9734    0.3951
Pt    0.0496    0.7495    0.4461
Pt    0.0474    0.7999    0.3982
Pt    0.0499    0.7995    0.4470
Pt    0.0484    0.8485    0.3973
Pt    0.0480    0.8484    0.4435
Pt    0.0428    0.8969    0.3961
Pt    0.0452    0.9004    0.4435
Pt    0.0480    0.9493    0.3974
Pt    0.0473    0.9511    0.4436
Pt    0.0727    0.9256    0.4444
Pt    0.0714    0.9241    0.3947
Pt    0.0984    0.7964    0.3983
Pt    0.0953    0.7985    0.4505
Pt    0.1013    0.8457    0.3973
Pt    0.0956    0.8488    0.4459
Pt    0.0994    0.9007    0.3968
Pt    0.0971    0.8994    0.4459
Pt    0.0988    0.9523    0.3973
Pt    0.0981    0.9471    0.4480
Pt    0.1747    0.7494    0.4251
Pt    0.0722    0.8755    0.4478
Pt    0.1481    0.7990    0.4003
Pt    0.1478    0.7982    0.4507
Pt    0.1491    0.8477    0.3978
Pt    0.1486    0.8493    0.4478
Pt    0.1485    0.8990    0.3945
Pt    0.1470    0.8955    0.4454
Pt    0.1510    0.9493    0.3958
Pt    0.1493    0.9492    0.4467
Pt    0.0701    0.8753    0.3970
Pt    0.0750    0.7966    0.3752
Pt    0.1995    0.8001    0.4010
Pt    0.1972    0.7989    0.4477
Pt    0.2027    0.8515    0.3967
Pt    0.1950    0.8492    0.4508
Pt    0.2008    0.9006    0.3940
Pt    0.1994    0.9011    0.4488
Pt    0.2002    0.9513    0.3987
Pt    0.1985    0.9455    0.4483
Pt    0.2260    0.9277    0.3951
Pt    0.0717    0.8242    0.4482
Pt    0.0720    0.8245    0.3963
Pt    0.0713    0.7751    0.4460
Pt    0.0729    0.7524    0.4735
Pt    0.0458    0.8225    0.3750
Pt    0.0716    0.7744    0.3999
Pt    0.0225    0.9733    0.4474
Pt    0.0228    0.9755    0.3988
Pt    0.0238    0.9234    0.4484
Pt    0.0732    0.9726    0.4945
Pt    0.0201    0.9221    0.3965
Pt    0.2440    0.8989    0.4467
Pt    0.0217    0.8756    0.4474
Pt    0.2223    0.8716    0.4480
Pt    0.9987    0.9736    0.4735
Pt    0.0430    0.7749    0.4207
Pt    0.0458    0.7757    0.4706
Pt    0.2455    0.8472    0.3963
Pt    0.0477    0.8225    0.4210
Pt    0.0468    0.8271    0.4689
Pt    0.0232    0.8719    0.4019
Pt    0.0504    0.8762    0.4241
Pt    0.0473    0.8739    0.4683
Pt    0.0208    0.8212    0.4444
Pt    0.0502    0.9240    0.4198
Pt    0.0464    0.9271    0.4712
Pt    0.1740    0.8772    0.3979
Pt    0.0469    0.9758    0.4212
Pt    0.0478    0.9736    0.4733
Pt    0.1509    0.8230    0.3743
Pt    0.0977    0.7713    0.4245
Pt    0.0947    0.7750    0.4740
Pt    0.0193    0.8241    0.3980
Pt    0.0985    0.8237    0.4225
Pt    0.0947    0.8270    0.4714
Pt    0.1746    0.9239    0.3970
Pt    0.0967    0.8744    0.4175
Pt    0.0982    0.8735    0.4714
Pt    0.1715    0.8237    0.4490
Pt    0.0965    0.9243    0.4205
Pt    0.1007    0.9258    0.4731
Pt    0.2235    0.8471    0.4248
Pt    0.0970    0.9720    0.4243
Pt    0.0993    0.9734    0.4726
Pt    0.1742    0.8248    0.3998
Pt    0.1496    0.7742    0.4272
Pt    0.1435    0.7736    0.4755
Pt    0.1758    0.7754    0.4495
Pt    0.1444    0.8243    0.4255
Pt    0.1481    0.8231    0.4744
Pt    0.1728    0.7756    0.4003
Pt    0.1482    0.8698    0.4206
Pt    0.1492    0.8741    0.4733
Pt    0.0204    0.7703    0.4469
Pt    0.1481    0.9209    0.4201
Pt    0.1475    0.9252    0.4693
Pt    0.9999    0.7981    0.4959
Pt    0.1485    0.9753    0.4192
Pt    0.1473    0.9744    0.4728
Pt    0.1751    0.8751    0.4452
Pt    0.1991    0.7729    0.4221
Pt    0.1989    0.7717    0.4758
Pt    0.1238    0.9742    0.4478
Pt    0.1977    0.8244    0.4263
Pt    0.1988    0.8194    0.4732
Pt    0.1963    0.7488    0.3990
Pt    0.2013    0.8743    0.4229
Pt    0.1986    0.8779    0.4742
Pt    0.1236    0.9741    0.3972
Pt    0.1978    0.9249    0.4198
Pt    0.2008    0.9231    0.4763
Pt    0.0199    0.7720    0.3947
Pt    0.1976    0.9736    0.4251
Pt    0.1994    0.9742    0.4738
Pt    0.1744    0.9224    0.4461
Pt    0.2459    0.9766    0.3733
Pt    0.1726    0.7979    0.3744
Pt    0.1261    0.9226    0.4438
Pt    0.0197    0.7970    0.4228
Pt    0.0224    0.8000    0.4691
Pt    0.1738    0.9728    0.3973
Pt    0.0173    0.8455    0.4243
Pt    0.0192    0.8511    0.4719
Pt    0.2233    0.9500    0.4738
Pt    0.0186    0.8998    0.4230
Pt    0.0236    0.8975    0.4742
Pt    0.2217    0.8218    0.4488
Pt    0.0219    0.9461    0.4213
Pt    0.0204    0.9503    0.4709
Pt    0.1259    0.9265    0.3972
Pt    0.2218    0.9477    0.4222
Pt    0.2260    0.8238    0.4013
Pt    0.2229    0.7964    0.4730
Pt    0.0734    0.7999    0.4242
Pt    0.0709    0.7995    0.4739
Pt    0.1729    0.9479    0.4714
Pt    0.0725    0.8459    0.4229
Pt    0.0719    0.8505    0.4683
Pt    0.2252    0.7988    0.4255
Pt    0.0734    0.9005    0.4218
Pt    0.0744    0.9014    0.4705
Pt    0.2243    0.8767    0.3943
Pt    0.0728    0.9469    0.4203
Pt    0.0720    0.9485    0.4715
Pt    0.1203    0.8747    0.4485
Pt    0.1243    0.8745    0.3967
Pt    0.0733    0.9966    0.4242
Pt    0.2215    0.7740    0.4500
Pt    0.1220    0.7953    0.4246
Pt    0.1231    0.7977    0.4752
Pt    0.2244    0.8987    0.4749
Pt    0.1208    0.8520    0.4221
Pt    0.1228    0.8485    0.4735
Pt    0.2234    0.9018    0.4205
Pt    0.1227    0.8994    0.4218
Pt    0.1210    0.8999    0.4725
Pt    0.1231    0.7730    0.4498
Pt    0.1236    0.9480    0.4218
Pt    0.1232    0.9494    0.4732
Pt    0.1220    0.8249    0.4514
Pt    0.0983    0.8721    0.3740
Pt    0.0207    0.7491    0.4730
Pt    0.1239    0.8216    0.4019
Pt    0.1711    0.8013    0.4256
Pt    0.1716    0.7945    0.4734
Pt    0.2210    0.7717    0.4011
Pt    0.1753    0.8517    0.4197
Pt    0.1719    0.8488    0.4738
Pt    0.2223    0.8459    0.4720
Pt    0.1738    0.8991    0.4216
Pt    0.1727    0.9002    0.4727
Pt    0.1747    0.9731    0.4503
Pt    0.1748    0.9479    0.4222
Pt    0.2223    0.7488    0.4257
Pt    0.2263    0.7504    0.3753
Pt    0.1746    0.7514    0.3748
Pt    0.0189    0.9482    0.3758
Pt    0.0450    0.8018    0.4954
Pt    0.0733    0.9225    0.4948
Pt    0.1247    0.8726    0.4948
Pt    0.1728    0.9225    0.4977
Pt    0.1500    0.7511    0.4013
Pt    0.0711    0.7517    0.4216
Pt    0.1502    0.9960    0.4458
Pt    0.2252    0.9226    0.4977
Pt    0.0448    0.9976    0.4498
Pt    0.1714    0.9759    0.4970
Pt    0.1964    0.9509    0.4963
Pt    0.1498    0.7492    0.4512
Pt    0.2461    0.8733    0.4208
Pt    0.0981    0.8536    0.4975
Pt    0.0242    0.8272    0.4950
Pt    0.1236    0.9493    0.3731
Pt    0.2230    0.9975    0.4731
Pt    0.0474    0.9018    0.4957
Pt    0.2267    0.8733    0.4976
Pt    0.0763    0.9973    0.4742
Pt    0.0476    0.9503    0.4958
Pt    0.0219    0.8476    0.3743
Pt    0.1458    0.7753    0.3755
Pt    0.0999    0.9978    0.4478
Pt    0.0218    0.9265    0.4960
Pt    0.2222    0.8200    0.4963
Pt    0.0238    0.9966    0.4754
Pt    0.1966    0.9980    0.3979
Pt    0.0977    0.8989    0.4971
Pt    0.1979    0.8464    0.4966
Pt    0.2213    0.9960    0.4238
Pt    0.0996    0.7728    0.3731
Pt    0.1990    0.8220    0.3763
Pt    0.2232    0.7973    0.3776
Pt    0.0711    0.8970    0.3743
Pt    0.1733    0.8217    0.4959
Pt    0.0473    0.7516    0.4944
Pt    0.1465    0.8990    0.4966
Pt    0.0955    0.8017    0.4960
Pt    0.1221    0.8218    0.4972
Pt    0.0453    0.8739    0.3733
Pt    0.0222    0.9983    0.4248
Pt    0.1240    0.7986    0.3739
Pt    0.1222    0.9004    0.3736
Pt    0.2470    0.8205    0.4746
Pt    0.9980    0.8229    0.4695
Pt    0.1458    0.9494    0.4966
Pt    0.2472    0.8974    0.4976
Pt    0.2207    0.7709    0.4978
Pt    0.2459    0.8205    0.3735
Pt    0.1721    0.8474    0.3737
Pt    0.0964    0.9743    0.3732
Pt    0.0985    0.9976    0.5961
Pt    0.1978    0.9960    0.5976
Pt    0.0220    0.8764    0.4997
Pt    0.2241    0.7500    0.5253
Pt    0.2257    0.9700    0.5994
Pt    0.9995    0.8738    0.5731
Pt    0.2211    0.9711    0.5448
Pt    0.0713    0.8766    0.4996
Pt    0.2274    0.9205    0.5968
Pt    0.0729    0.7757    0.4998
Pt    0.2250    0.9218    0.5465
Pt    0.0449    0.7489    0.5935
Pt    0.2293    0.8713    0.5982
Pt    0.2246    0.8724    0.5469
Pt    0.0957    0.7514    0.4984
Pt    0.1795    0.9205    0.5967
Pt    0.1739    0.9228    0.5479
Pt    0.1975    0.7945    0.5006
Pt    0.1469    0.7492    0.4999
Pt    0.0457    0.8015    0.5476
Pt    0.0490    0.7999    0.5987
Pt    0.0965    0.7506    0.5971
Pt    0.0456    0.8446    0.5488
Pt    0.0488    0.8500    0.5987
Pt    0.1240    0.9178    0.5974
Pt    0.0479    0.9009    0.5490
Pt    0.0490    0.9002    0.5967
Pt    0.2456    0.8227    0.5210
Pt    0.0485    0.9490    0.5506
Pt    0.0473    0.9498    0.5970
Pt    0.1233    0.9200    0.5489
Pt    0.0008    0.9002    0.5467
Pt    0.0972    0.7512    0.5509
Pt    0.1220    0.8737    0.5992
Pt    0.0982    0.7963    0.5492
Pt    0.0981    0.7967    0.5987
Pt    0.1240    0.8735    0.5512
Pt    0.1002    0.8479    0.5480
Pt    0.1008    0.8464    0.5986
Pt    0.1258    0.8212    0.6003
Pt    0.0977    0.8980    0.5494
Pt    0.0964    0.8972    0.5967
Pt    0.1224    0.8224    0.5465
Pt    0.0989    0.9501    0.5499
Pt    0.0986    0.9489    0.5959
Pt    0.1755    0.8752    0.5993
Pt    0.1745    0.8741    0.5471
Pt    0.0727    0.9965    0.5239
Pt    0.1246    0.7724    0.5994
Pt    0.1501    0.8002    0.5504
Pt    0.1499    0.7984    0.6005
Pt    0.1249    0.7736    0.5513
Pt    0.1474    0.8498    0.5481
Pt    0.1492    0.8476    0.5973
Pt    0.0751    0.9734    0.5963
Pt    0.1480    0.8965    0.5491
Pt    0.1495    0.8965    0.5983
Pt    0.0726    0.9742    0.5487
Pt    0.1461    0.9472    0.5480
Pt    0.1502    0.9461    0.5999
Pt    0.0724    0.9255    0.5981
Pt    0.1771    0.8205    0.5995
Pt    0.1468    0.8481    0.5001
Pt    0.1224    0.9955    0.6228
Pt    0.1964    0.7983    0.5506
Pt    0.2002    0.7953    0.6027
Pt    0.1492    0.7498    0.6002
Pt    0.1973    0.8476    0.5458
Pt    0.2029    0.8491    0.5988
Pt    0.0724    0.9239    0.5462
Pt    0.1996    0.8995    0.5476
Pt    0.2046    0.8966    0.5960
Pt    0.0735    0.8732    0.5981
Pt    0.1990    0.9465    0.5473
Pt    0.2004    0.9495    0.5960
Pt    0.9985    0.8537    0.5000
Pt    0.0717    0.7483    0.5232
Pt    0.2206    0.8233    0.5947
Pt    0.2255    0.8211    0.5532
Pt    0.1217    0.9487    0.6196
Pt    0.2239    0.7676    0.6039
Pt    0.2273    0.7746    0.5509
Pt    0.0214    0.7742    0.4983
Pt    0.1741    0.9739    0.5967
Pt    0.1715    0.9717    0.5488
Pt    0.0457    0.7783    0.5202
Pt    0.0439    0.7718    0.5706
Pt    0.0497    0.8252    0.5208
Pt    0.0492    0.8243    0.5750
Pt    0.0474    0.8757    0.5259
Pt    0.0484    0.8753    0.5732
Pt    0.0486    0.9239    0.5208
Pt    0.0519    0.9255    0.5732
Pt    0.0475    0.9726    0.5237
Pt    0.0493    0.9792    0.5709
Pt    0.0951    0.7735    0.5249
Pt    0.0985    0.7731    0.5746
Pt    0.0975    0.8238    0.5190
Pt    0.0970    0.8213    0.5725
Pt    0.0988    0.8740    0.5252
Pt    0.0994    0.8703    0.5726
Pt    0.0963    0.9237    0.5238
Pt    0.0983    0.9250    0.5736
Pt    0.0973    0.9747    0.5215
Pt    0.1003    0.9746    0.5715
Pt    0.1483    0.7714    0.5296
Pt    0.1494    0.7716    0.5742
Pt    0.1474    0.8206    0.5190
Pt    0.1503    0.8223    0.5759
Pt    0.1446    0.8740    0.5237
Pt    0.1511    0.8727    0.5734
Pt    0.1491    0.9202    0.5218
Pt    0.1487    0.9221    0.5735
Pt    0.1454    0.9745    0.5230
Pt    0.1489    0.9696    0.5746
Pt    0.2007    0.7712    0.5246
Pt    0.1998    0.7738    0.5777
Pt    0.1992    0.8214    0.5206
Pt    0.1979    0.8256    0.5703
Pt    0.1988    0.8712    0.5225
Pt    0.1978    0.8716    0.5705
Pt    0.1971    0.9245    0.5180
Pt    0.2016    0.9208    0.5726
Pt    0.1968    0.9739    0.5234
Pt    0.1975    0.9740    0.5682
Pt    0.1738    0.8253    0.5465
Pt    0.0229    0.9736    0.5007
Pt    0.0226    0.8053    0.5251
Pt    0.0237    0.7988    0.5754
Pt    0.0257    0.8479    0.5222
Pt    0.0244    0.8492    0.5732
Pt    0.0227    0.9047    0.5239
Pt    0.0225    0.9004    0.5723
Pt    0.0235    0.9491    0.5240
Pt    0.0242    0.9489    0.5740
Pt    0.1734    0.7720    0.5990
Pt    0.1722    0.8714    0.5003
Pt    0.0716    0.8005    0.5233
Pt    0.0709    0.7982    0.5725
Pt    0.0728    0.8513    0.5232
Pt    0.0717    0.8491    0.5714
Pt    0.0743    0.8984    0.5223
Pt    0.0741    0.8966    0.5720
Pt    0.0714    0.9489    0.5183
Pt    0.0756    0.9508    0.5729
Pt    0.1755    0.7732    0.5486
Pt    0.2471    0.7718    0.5779
Pt    0.1239    0.7962    0.5246
Pt    0.1241    0.8003    0.5744
Pt    0.1214    0.8463    0.5240
Pt    0.1227    0.8449    0.5743
Pt    0.1225    0.8976    0.5242
Pt    0.1227    0.8971    0.5742
Pt    0.1210    0.9521    0.5252
Pt    0.1237    0.9454    0.5755
Pt    0.0504    0.9948    0.4983
Pt    0.1264    0.8487    0.6227
Pt    0.1746    0.8008    0.5268
Pt    0.1750    0.7958    0.5767
Pt    0.1726    0.8483    0.5243
Pt    0.1734    0.8472    0.5783
Pt    0.1721    0.8981    0.5227
Pt    0.1750    0.8991    0.5712
Pt    0.1733    0.9467    0.5243
Pt    0.1740    0.9469    0.5740
Pt    0.1223    0.9749    0.5968
Pt    0.1245    0.9741    0.5501
Pt    0.2205    0.7983    0.5263
Pt    0.2256    0.7977    0.5764
Pt    0.2228    0.8462    0.5242
Pt    0.2249    0.8480    0.5726
Pt    0.2271    0.8938    0.5224
Pt    0.2277    0.8964    0.5713
Pt    0.2218    0.9485    0.5223
Pt    0.2256    0.9477    0.5715
Pt    0.0731    0.8747    0.5488
Pt    0.0207    0.7748    0.5432
Pt    0.0225    0.7749    0.5982
Pt    0.0742    0.8260    0.6000
Pt    0.0204    0.8231    0.5517
Pt    0.0272    0.8252    0.6008
Pt    0.0716    0.8240    0.5480
Pt    0.0237    0.8759    0.5488
Pt    0.0240    0.8729    0.5976
Pt    0.0702    0.7729    0.5969
Pt    0.0228    0.9261    0.5496
Pt    0.0222    0.9249    0.5983
Pt    0.0690    0.7741    0.5487
Pt    0.0220    0.9754    0.5518
Pt    0.0234    0.9743    0.5984
Pt    0.0489    0.9980    0.5968
Pt    0.1204    0.9227    0.5018
Pt    0.1480    0.7946    0.4996
Pt    0.2015    0.9194    0.6216
Pt    0.2236    0.9958    0.5718
Pt    0.9986    0.9971    0.5952
Pt    0.2218    0.9977    0.6225
Pt    0.0502    0.8753    0.6225
Pt    0.0216    0.8996    0.6219
Pt    0.9990    0.8291    0.5217
Pt    0.2466    0.7960    0.4993
Pt    0.1971    0.9982    0.5483
Pt    0.1488    0.9979    0.5465
Pt    0.1205    0.7729    0.4996
Pt    0.0453    0.9269    0.6214
Pt    0.9994    0.9747    0.5242
Pt    0.2002    0.8965    0.4996
Pt    0.2468    0.8453    0.5456
Pt    0.1205    0.9764    0.4982
Pt    0.0730    0.9978    0.6211
Pt    0.1740    0.8474    0.6202
Pt    0.1744    0.7700    0.5012
Pt    0.0960    0.9737    0.6218
Pt    0.9984    0.8013    0.5970
Pt    0.2273    0.8964    0.6214
Pt    0.0985    0.9251    0.6190
Pt    0.9979    0.9241    0.6212
Pt    0.9983    0.8490    0.5994
Pt    0.9990    0.9742    0.6219
Pt    0.1760    0.9477    0.6196
Pt    0.0239    0.7980    0.6217
Pt    0.0992    0.9493    0.4998
Pt    0.2476    0.9752    0.5233
Pt    0.9985    0.7761    0.6219
Pt    0.9982    0.7723    0.5728
Pt    0.9991    0.9486    0.5450
Pt    0.9977    0.8009    0.5486
Pt    0.9991    0.8745    0.5240
Pt    0.2271    0.8055    0.6221
Pt    0.2227    0.9474    0.6225
Pt    0.1995    0.9707    0.6222
Pt    0.2008    0.8726    0.6227
Pt    0.1761    0.8997    0.6219
Pt    0.1991    0.9962    0.4987
Pt    0.2257    0.9741    0.4979
Pt    0.0483    0.8514    0.4984
Pt    0.2245    0.8493    0.6265
Pt    0.1520    0.8231    0.6244
Pt    0.0505    0.8242    0.6256
Pt    0.9983    0.9003    0.7459
Pt    0.2249    0.9721    0.6974
Pt    0.1749    0.7496    0.6237
Pt    0.2238    0.9700    0.6472
Pt    0.2262    0.9206    0.6995
Pt    0.2221    0.9216    0.6482
Pt    0.2223    0.8656    0.7016
Pt    0.0513    0.7484    0.7000
Pt    0.9980    0.8752    0.7237
Pt    0.0456    0.7981    0.6498
Pt    0.0527    0.7993    0.6998
Pt    0.0494    0.8498    0.6477
Pt    0.0506    0.8494    0.6973
Pt    0.0462    0.9015    0.6443
Pt    0.0501    0.8999    0.6981
Pt    0.0497    0.9453    0.6488
Pt    0.0493    0.9483    0.6942
Pt    0.9992    0.8498    0.6964
Pt    1.0000    0.8024    0.6980
Pt    0.1007    0.7996    0.6491
Pt    0.1004    0.8015    0.6961
Pt    0.1012    0.8499    0.6492
Pt    0.1029    0.8521    0.6959
Pt    0.1007    0.9003    0.6435
Pt    0.0993    0.8999    0.6969
Pt    0.0990    0.9489    0.6465
Pt    0.0999    0.9468    0.6977
Pt    0.9992    0.8760    0.6734
Pt    0.1483    0.7968    0.6495
Pt    0.1480    0.7968    0.6980
Pt    0.1520    0.8462    0.6475
Pt    0.1525    0.8483    0.6958
Pt    0.1519    0.8983    0.6491
Pt    0.1542    0.8992    0.6958
Pt    0.1489    0.9485    0.6483
Pt    0.1507    0.9467    0.6975
Pt    0.2006    0.8010    0.6478
Pt    0.2262    0.8301    0.6996
Pt    0.1998    0.8472    0.6527
Pt    0.1967    0.8418    0.7022
Pt    0.2010    0.8958    0.6445
Pt    0.2002    0.8970    0.7001
Pt    0.1973    0.9506    0.6472
Pt    0.2019    0.9433    0.6995
Pt    0.2008    0.9974    0.6930
Pt    0.0235    0.9769    0.6961
Pt    0.0216    0.9748    0.6497
Pt    0.2260    0.8733    0.6487
Pt    0.1512    0.7749    0.6274
Pt    0.0231    0.9259    0.6994
Pt    0.2263    0.8229    0.6494
Pt    0.0759    0.8231    0.6496
Pt    0.0772    0.8511    0.6231
Pt    0.1776    0.9698    0.6946
Pt    0.1719    0.9736    0.6480
Pt    0.1765    0.9207    0.6962
Pt    0.1802    0.9210    0.6503
Pt    0.1795    0.8724    0.6994
Pt    0.1468    0.9978    0.6950
Pt    0.0980    0.9969    0.6463
Pt    0.0468    0.7723    0.6722
Pt    0.0510    0.7708    0.7231
Pt    0.9989    0.8245    0.7212
Pt    0.0517    0.8238    0.6731
Pt    0.0498    0.8287    0.7235
Pt    0.0237    0.8501    0.6235
Pt    0.0479    0.8738    0.6743
Pt    0.0479    0.8747    0.7209
Pt    0.0227    0.7489    0.6715
Pt    0.0421    0.9220    0.6707
Pt    0.0462    0.9241    0.7209
Pt    0.0211    0.9257    0.6464
Pt    0.0482    0.9744    0.6703
Pt    0.0434    0.9732    0.7197
Pt    0.1994    0.9960    0.6496
Pt    0.0992    0.7726    0.6718
Pt    0.1035    0.7713    0.7284
Pt    0.9979    0.8749    0.6240
Pt    0.0989    0.8250    0.6737
Pt    0.0967    0.8252    0.7241
Pt    0.0790    0.7728    0.6988
Pt    0.0998    0.8753    0.6701
Pt    0.0992    0.8771    0.7269
Pt    0.9980    0.7515    0.6953
Pt    0.0971    0.9219    0.6698
Pt    0.0990    0.9226    0.7220
Pt    0.2471    0.8772    0.6728
Pt    0.1015    0.9686    0.6713
Pt    0.1004    0.9719    0.7241
Pt    0.0213    0.8744    0.6985
Pt    0.1485    0.7741    0.6745
Pt    0.0014    0.7767    0.6730
Pt    0.1483    0.8235    0.6730
Pt    0.1448    0.8236    0.7222
Pt    0.0242    0.8761    0.6497
Pt    0.1502    0.8735    0.6742
Pt    0.1497    0.8735    0.7201
Pt    0.9986    0.8987    0.6482
Pt    0.1476    0.9224    0.6703
Pt    0.1530    0.9225    0.7213
Pt    0.0249    0.8252    0.6952
Pt    0.1488    0.9726    0.6728
Pt    0.1484    0.9732    0.7188
Pt    0.1738    0.8702    0.6462
Pt    0.9989    0.8501    0.6476
Pt    0.1718    0.8202    0.6989
Pt    0.2031    0.8229    0.6753
Pt    0.0757    0.7486    0.6745
Pt    0.2025    0.8745    0.6757
Pt    0.1987    0.8745    0.7266
Pt    0.1471    0.9975    0.6498
Pt    0.2001    0.9209    0.6752
Pt    0.1991    0.9223    0.7250
Pt    0.1017    0.8745    0.6242
Pt    0.2019    0.9704    0.6730
Pt    0.2002    0.9743    0.7203
Pt    0.1764    0.8216    0.6481
Pt    0.1743    0.7774    0.6518
Pt    0.0744    0.7509    0.6237
Pt    0.0239    0.8232    0.6501
Pt    0.0242    0.7998    0.6744
Pt    0.0256    0.8024    0.7214
Pt    0.1233    0.9702    0.6955
Pt    0.0260    0.8495    0.6725
Pt    0.0241    0.8482    0.7214
Pt    0.1485    0.9247    0.6242
Pt    0.0238    0.8979    0.6739
Pt    0.0222    0.8981    0.7234
Pt    0.0255    0.7791    0.6987
Pt    0.0238    0.9513    0.6699
Pt    0.0173    0.9506    0.7240
Pt    0.1233    0.9726    0.6484
Pt    0.0719    0.7739    0.6483
Pt    0.0222    0.7493    0.7217
Pt    0.1270    0.9219    0.7004
Pt    0.0763    0.7965    0.6738
Pt    0.0736    0.7957    0.7247
Pt    0.1222    0.9239    0.6465
Pt    0.0732    0.8508    0.6714
Pt    0.0775    0.8503    0.7230
Pt    0.1284    0.8779    0.6970
Pt    0.0703    0.8992    0.6727
Pt    0.0742    0.8997    0.7228
Pt    0.1214    0.9976    0.6723
Pt    0.0744    0.9480    0.6727
Pt    0.0688    0.9499    0.7195
Pt    0.1268    0.8723    0.6478
Pt    0.0974    0.7497    0.6473
Pt    0.1257    0.8257    0.6948
Pt    0.1251    0.7989    0.6746
Pt    0.1234    0.7983    0.7216
Pt    0.9999    0.9267    0.6744
Pt    0.1263    0.8486    0.6724
Pt    0.1227    0.8471    0.7214
Pt    0.1247    0.8239    0.6455
Pt    0.1226    0.8977    0.6708
Pt    0.1262    0.8986    0.7245
Pt    0.1204    0.7714    0.6987
Pt    0.1223    0.9410    0.6737
Pt    0.1246    0.9468    0.7194
Pt    0.1246    0.7732    0.6474
Pt    0.0760    0.9779    0.6951
Pt    0.1744    0.7991    0.6749
Pt    0.0753    0.9715    0.6499
Pt    0.1765    0.8469    0.6752
Pt    0.1710    0.8497    0.7256
Pt    0.2235    0.9958    0.6707
Pt    0.1751    0.8967    0.6707
Pt    0.1747    0.8962    0.7225
Pt    0.0719    0.9224    0.6958
Pt    0.1756    0.9428    0.6740
Pt    0.1746    0.9465    0.7211
Pt    0.0255    0.7724    0.6472
Pt    0.0736    0.9226    0.6464
Pt    0.0725    0.9940    0.7248
Pt    0.0750    0.8748    0.6982
Pt    0.2289    0.8489    0.6712
Pt    0.0716    0.8749    0.6470
Pt    0.2247    0.9004    0.6743
Pt    0.2249    0.8953    0.7240
Pt    0.0749    0.8239    0.6998
Pt    0.2235    0.9446    0.6749
Pt    0.2253    0.9488    0.7241
Pt    0.0990    0.8237    0.6235
Pt    0.1999    0.7736    0.6280
Pt    0.1257    0.7484    0.6697
Pt    0.0510    0.7754    0.6231
Pt    0.1715    0.9954    0.6729
Pt    0.1743    0.7987    0.6253
Pt    0.0735    0.7987    0.6255
Pt    0.0217    0.9492    0.6254
Pt    0.1734    0.9936    0.7169
Pt    0.0991    0.9975    0.7014
Pt    0.2263    0.9967    0.7232
Pt    0.1260    0.7996    0.6238
Pt    0.9983    0.8251    0.6716
Pt    0.2008    0.8251    0.6250
Pt    0.1012    0.7748    0.6235
Pt    0.1224    0.9714    0.7470
Pt    0.9996    0.8241    0.6243
Pt    0.0982    0.9005    0.7476
Pt    0.0696    0.9262    0.7464
Pt    0.2476    0.9234    0.6721
Pt    0.1272    0.8980    0.6241
Pt    0.1238    0.9981    0.7258
Pt    0.1515    0.9722    0.6233
Pt    0.0240    0.8725    0.7457
Pt    0.0725    0.9012    0.6234
Pt    0.0495    0.9728    0.6241
Pt    0.1500    0.8714    0.6233
Pt    0.0002    0.8998    0.6976
Pt    0.1989    0.9967    0.7473
Pt    0.0999    0.8009    0.7468
Pt    0.0222    0.9251    0.7474
Pt    0.1003    0.9466    0.7441
Pt    0.0195    0.9730    0.7470
Pt    0.0228    0.8233    0.7451
Pt    0.0491    0.8998    0.7444
Pt    0.1282    0.9228    0.7467
Pt    0.1736    0.9196    0.7474
Pt    0.0477    0.8528    0.7458
Pt    0.1755    0.9725    0.7443
Pt    0.0469    0.9519    0.7454
Pt    0.0221    0.7772    0.7440
Pt    0.0997    0.8501    0.7477
Pt    0.1479    0.9927    0.7475
Pt    0.0744    0.9464    0.6233
Pt    0.0484    0.7501    0.8449
Pt    0.0189    0.9743    0.7990
Pt    0.0724    0.7486    0.8685
Pt    0.9979    0.7989    0.8477
Pt    0.0471    0.7485    0.7953
Pt    0.2201    0.9714    0.8474
Pt    0.0256    0.7498    0.8202
Pt    0.0280    0.8802    0.8511
Pt    0.2230    0.9733    0.7970
Pt    0.1199    0.9142    0.8512
Pt    0.0999    0.9977    0.7482
Pt    0.1047    0.7511    0.8416
Pt    0.1227    0.9208    0.7994
Pt    0.0755    0.7758    0.8415
Pt    0.2212    0.9215    0.8456
Pt    0.9985    0.9546    0.8484
Pt    0.0755    0.8234    0.7498
Pt    0.1520    0.8948    0.7508
Pt    0.9982    0.8757    0.7731
Pt    0.0492    0.7989    0.7947
Pt    0.0480    0.7998    0.8457
Pt    0.0005    0.8753    0.8693
Pt    0.0506    0.8490    0.7954
Pt    0.0523    0.8528    0.8485
Pt    0.9988    0.8996    0.8441
Pt    0.0474    0.8954    0.7964
Pt    0.9981    0.7762    0.7722
Pt    0.0466    0.9465    0.7961
Pt    0.1227    0.9716    0.7984
Pt    0.2475    0.9475    0.7948
Pt    0.0251    0.8718    0.7988
Pt    0.1000    0.8494    0.7988
Pt    0.0005    0.8036    0.7968
Pt    0.0932    0.8994    0.8007
Pt    0.0003    0.9231    0.8199
Pt    0.0981    0.9488    0.7989
Pt    0.0976    0.9508    0.8475
Pt    0.2451    0.9465    0.8427
Pt    0.0742    0.7744    0.7951
Pt    0.1444    0.8957    0.8019
Pt    0.1517    0.8960    0.8399
Pt    0.0734    0.8714    0.7956
Pt    0.1493    0.9464    0.7994
Pt    0.1473    0.9501    0.8472
Pt    0.9983    0.7498    0.7480
Pt    0.1951    0.8950    0.8453
Pt    0.0236    0.7730    0.7916
Pt    0.1986    0.9496    0.7973
Pt    0.1973    0.9479    0.8488
Pt    0.2218    0.9973    0.8721
Pt    0.2179    0.9213    0.7996
Pt    0.1203    0.8758    0.7976
Pt    0.2476    0.8487    0.8493
Pt    0.1468    0.9975    0.7993
Pt    0.2205    0.8702    0.8439
Pt    0.1720    0.9240    0.8468
Pt    0.0233    0.8498    0.8687
Pt    0.1707    0.9710    0.8480
Pt    0.0977    0.9975    0.7967
Pt    0.0242    0.9219    0.7956
Pt    0.0761    0.8237    0.7962
Pt    0.2005    0.9505    0.7479
Pt    0.0490    0.7763    0.7703
Pt    0.0507    0.7746    0.8202
Pt    0.1230    0.9732    0.8482
Pt    0.0489    0.8260    0.7696
Pt    0.0478    0.8267    0.8184
Pt    0.2230    0.8936    0.8696
Pt    0.0531    0.8724    0.7725
Pt    0.0523    0.8752    0.8227
Pt    0.0481    0.9252    0.7704
Pt    0.0452    0.9269    0.8231
Pt    0.0482    0.9742    0.7748
Pt    0.0487    0.9748    0.8248
Pt    0.1706    0.9197    0.8005
Pt    0.0999    0.8241    0.7749
Pt    0.0986    0.8766    0.7745
Pt    0.0959    0.8745    0.8218
Pt    0.0986    0.9230    0.7760
Pt    0.0967    0.9247    0.8259
Pt    0.0992    0.9700    0.7710
Pt    0.0950    0.9717    0.8252
Pt    0.2214    0.9474    0.8203
Pt    0.1452    0.8728    0.7744
Pt    0.1522    0.9226    0.7715
Pt    0.1442    0.9229    0.8253
Pt    0.2220    0.9507    0.7742
Pt    0.1471    0.9721    0.7760
Pt    0.1455    0.9729    0.8206
Pt    0.0794    0.7513    0.8187
Pt    0.1752    0.8706    0.7543
Pt    0.1923    0.9224    0.7753
Pt    0.1958    0.9225    0.8226
Pt    0.9981    0.8997    0.7971
Pt    0.1962    0.9735    0.7739
Pt    0.1994    0.9732    0.8217
Pt    0.0783    0.7495    0.7741
Pt    0.0249    0.7762    0.8430
Pt    0.0658    0.9714    0.8523
Pt    0.1727    0.9724    0.8006
Pt    0.0239    0.7990    0.7704
Pt    0.0283    0.8029    0.8191
Pt    0.0250    0.8249    0.8457
Pt    0.0257    0.8506    0.7728
Pt    0.0239    0.8526    0.8286
Pt    0.1697    0.9942    0.7720
Pt    0.0270    0.8980    0.7708
Pt    0.0214    0.8985    0.8214
Pt    0.0228    0.9497    0.7743
Pt    0.0226    0.9531    0.8231
Pt    0.2455    0.8919    0.7961
Pt    0.1257    0.7509    0.8663
Pt    0.0240    0.8260    0.7969
Pt    0.0767    0.7949    0.7693
Pt    0.0711    0.8053    0.8193
Pt    0.0722    0.8242    0.8455
Pt    0.0752    0.8473    0.7725
Pt    0.0760    0.8467    0.8205
Pt    0.0729    0.9001    0.7738
Pt    0.0735    0.9005    0.8239
Pt    0.0748    0.9470    0.7700
Pt    0.0720    0.9473    0.8231
Pt    0.0730    0.9722    0.7996
Pt    0.1214    0.8511    0.7736
Pt    0.1247    0.9014    0.7715
Pt    0.1183    0.8983    0.8238
Pt    0.1242    0.9453    0.7738
Pt    0.1224    0.9474    0.8239
Pt    0.2448    0.9753    0.7729
Pt    0.1722    0.8947    0.7761
Pt    0.1468    0.9972    0.8445
Pt    0.1741    0.9489    0.7710
Pt    0.1726    0.9469    0.8228
Pt    0.2260    0.8956    0.8247
Pt    0.0706    0.9253    0.7997
Pt    0.1993    0.8948    0.7530
Pt    0.9997    0.7510    0.8446
Pt    0.2223    0.9980    0.7738
Pt    0.2223    0.9184    0.7514
Pt    0.1204    0.9968    0.8225
Pt    0.0032    0.7742    0.8719
Pt    0.1225    0.9960    0.7728
Pt    0.1947    0.9955    0.8475
Pt    0.0701    0.9975    0.8235
Pt    0.0208    0.9955    0.7723
Pt    0.0015    0.7777    0.8168
Pt    0.0728    0.8007    0.8689
Pt    1.0000    0.7498    0.7941
Pt    0.1953    0.9963    0.7987
Pt    0.0755    0.8752    0.7492
Pt    0.2199    0.8509    0.8727
Pt    0.0483    0.7745    0.8676
Pt    0.9998    0.8263    0.8211
Pt    0.0743    0.9735    0.7488
Pt    0.0899    0.9940    0.8512
Pt    0.1686    0.8974    0.8678
Pt    0.2240    0.9451    0.8691
Pt    0.0492    0.8248    0.8710
Pt    0.2464    0.9708    0.8692
Pt    0.0986    0.7752    0.8668
Pt    0.0016    0.8251    0.7715
Pt    0.1958    0.8732    0.8704
Pt    0.1210    0.9448    0.8659
Pt    0.1462    0.9219    0.8693
Pt    0.2470    0.9222    0.8701
Pt    0.9995    0.8232    0.8708
Pt    0.1706    0.9476    0.8725
Pt    0.0944    0.9685    0.8724
Pt    0.0440    0.9928    0.7491
Pt    0.2249    0.9750    0.7495
Pt    0.0753    0.7722    0.7483
Pt    0.0477    0.7999    0.7491
Pt    0.1462    0.8494    0.7493
Pt    0.2471    0.9729    0.8207
Pt    0.1946    0.9730    0.8724
Pt    0.9994    0.8475    0.7482
Pt    0.1244    0.8216    0.7492
Pt    0.1494    0.9468    0.7480
Pt    0.1249    0.8742    0.7481
Pt    0.1947    0.7499    0.9423
Pt    0.0017    0.8024    0.8966
Pt    0.2215    0.9742    0.9459
Pt    0.2460    0.8227    0.9165
Pt    0.2227    0.9728    0.8929
Pt    0.2459    0.8505    0.8976
Pt    0.9990    0.8484    0.8961
Pt    0.0516    0.8024    0.8971
Pt    0.0547    0.8029    0.9411
Pt    0.0009    0.8271    0.9228
Pt    0.0517    0.7489    0.8949
Pt    0.0990    0.7982    0.8903
Pt    0.0958    0.8037    0.9460
Pt    0.2476    0.7530    0.9476
Pt    0.0217    0.7728    0.9968
Pt    0.1482    0.8012    0.9441
Pt    0.1446    0.8462    0.9432
Pt    0.1432    0.9467    0.8911
Pt    0.0978    0.8009    0.9915
Pt    0.1953    0.7969    0.9445
Pt    0.1931    0.8473    0.8909
Pt    0.1940    0.8490    0.9435
Pt    0.1986    0.8964    0.8989
Pt    0.1938    0.8985    0.9432
Pt    0.1981    0.9484    0.8921
Pt    0.1959    0.9492    0.9464
Pt    0.2442    0.8967    0.9495
Pt    0.2170    0.9243    0.9447
Pt    0.2220    0.9231    0.8969
Pt    0.2179    0.8733    0.9455
Pt    0.0511    0.7745    0.9189
Pt    0.0497    0.7758    0.9678
Pt    0.1970    0.7497    0.9920
Pt    0.0993    0.7791    0.9187
Pt    0.0963    0.7715    0.9688
Pt    0.0969    0.8303    0.9672
Pt    0.1517    0.7752    0.9131
Pt    0.1465    0.7750    0.9695
Pt    0.1457    0.8250    0.9695
Pt    0.1440    0.8781    0.9695
Pt    0.1477    0.9740    0.9226
Pt    0.1949    0.7770    0.9169
Pt    0.1993    0.7729    0.9682
Pt    0.1989    0.8258    0.9208
Pt    0.1995    0.8253    0.9661
Pt    0.1949    0.8703    0.9194
Pt    0.1944    0.8757    0.9663
Pt    0.1939    0.9248    0.9180
Pt    0.1960    0.9246    0.9719
Pt    0.1957    0.9718    0.9234
Pt    0.1960    0.9720    0.9727
Pt    0.9996    0.7994    0.9944
Pt    0.2462    0.8469    0.9489
Pt    0.0261    0.8017    0.9222
Pt    0.0238    0.7993    0.9720
Pt    0.0719    0.7747    0.9941
Pt    0.0246    0.7491    0.9207
Pt    0.0795    0.8077    0.9153
Pt    0.0720    0.8016    0.9709
Pt    0.2198    0.7495    0.9160
Pt    0.1179    0.9963    0.9223
Pt    0.1260    0.7973    0.9159
Pt    0.1216    0.7997    0.9674
Pt    0.1202    0.8543    0.9679
Pt    0.1711    0.9982    0.8741
Pt    0.1963    0.8989    0.9959
Pt    0.1727    0.8012    0.9182
Pt    0.1735    0.7999    0.9699
Pt    0.1694    0.8477    0.9146
Pt    0.1681    0.8473    0.9674
Pt    0.1684    0.9005    0.9219
Pt    0.1713    0.8992    0.9711
Pt    0.1664    0.9437    0.9233
Pt    0.1681    0.9497    0.9721
Pt    0.1462    0.9966    0.8996
Pt    0.0879    0.9724    0.9052
Pt    0.2223    0.7984    0.9221
Pt    0.2235    0.7959    0.9680
Pt    0.2217    0.8485    0.9226
Pt    0.2180    0.8515    0.9704
Pt    0.2217    0.8993    0.9219
Pt    0.2177    0.8998    0.9706
Pt    0.2226    0.9481    0.9198
Pt    0.2200    0.9498    0.9704
Pt    0.0278    0.7763    0.8958
Pt    0.0288    0.7752    0.9434
Pt    0.0267    0.8246    0.8952
Pt    0.0739    0.7770    0.8932
Pt    0.0732    0.7750    0.9446
Pt    0.1250    0.7732    0.8904
Pt    0.1211    0.7768    0.9435
Pt    0.1231    0.8235    0.9418
Pt    0.1191    0.9707    0.8970
Pt    0.1721    0.7730    0.9443
Pt    0.1706    0.8221    0.9427
Pt    0.1710    0.8766    0.8952
Pt    0.1702    0.8717    0.9441
Pt    0.1665    0.9219    0.8952
Pt    0.1685    0.9236    0.9510
Pt    0.1716    0.9705    0.9020
Pt    0.1709    0.9721    0.9452
Pt    0.2211    0.7701    0.9415
Pt    0.2193    0.8238    0.8955
Pt    0.2239    0.8236    0.9478
Pt    0.2200    0.8718    0.8982
Pt    0.1194    0.8295    0.9945
Pt    0.0204    0.8249    0.9961
Pt    0.2446    0.9730    0.9718
Pt    0.1684    0.9948    0.9732
Pt    0.1976    0.9975    0.8969
Pt    0.2462    0.7739    0.9202
Pt    0.1457    0.8515    0.9927
Pt    0.0275    0.7505    0.9719
Pt    0.1695    0.8767    0.9947
Pt    0.0032    0.7778    0.9222
Pt    0.2212    0.9740    0.9975
Pt    0.1974    0.9491    0.9952
Pt    0.0008    0.7763    0.9719
Pt    0.1488    0.7506    0.8908
Pt    0.1442    0.9003    0.9916
Pt    0.1992    0.8028    0.9928
Pt    0.1239    0.7769    0.9923
Pt    0.0978    0.7505    0.9441
Pt    0.1736    0.7758    0.9949
Pt    0.0925    0.8526    0.9942
Pt    0.0704    0.7513    0.9681
Pt    0.0972    0.7510    0.8913
Pt    0.0457    0.7958    0.9975
Pt    0.2441    0.8728    0.9729
Pt    0.0763    0.7502    0.9183
Pt    0.2468    0.9490    0.8974
Pt    0.2460    0.9732    0.9225
Pt    0.2443    0.9974    0.9460
Pt    0.1739    0.7495    0.9162
Pt    0.0018    0.8021    0.9471
Pt    0.1498    0.7993    0.9925
Pt    0.2218    0.9972    0.9216
Pt    0.2241    0.8240    0.9944
Pt    0.2472    0.7731    0.9714
Pt    0.0702    0.8273    0.9924
Pt    0.0032    0.7502    0.8952
Pt    0.1219    0.7498    0.9174
Pt    0.1953    0.9980    0.9477
Pt    0.1936    0.8513    0.9915
Pt    0.1457    0.7508    0.9958
Pt    0.1399    0.9945    0.9502
Pt    0.1735    0.8241    0.9963
Pt    0.1450    0.7526    0.9440
Pt    0.1924    0.9164    0.8741
Pt    0.2435    0.9454    0.9942
Pt    0.2228    0.7746    0.9952
Pt    0.0670    0.9904    0.8799
Pt    0.2437    0.9232    0.9705
Pt    0.2470    0.8990    0.8973
Pt    0.1969    0.9972    0.9972
Pt    0.1184    0.8744    0.9949
Pt    0.1722    0.7511    0.9685
Pt    0.2212    0.9953    0.9724
Pt    0.2470    0.9243    0.9224
Pt    0.2440    0.9496    0.9464
Pt    0.1715    0.9229    0.9966
Pt    0.1455    0.9743    0.8750
Pt    0.1708    0.9720    0.9968
Pt    0.2472    0.8008    0.9964
Pt    0.2440    0.8751    0.9240
Pt    0.2428    0.9001    0.9963
Pt    0.2181    0.9228    0.9972
Pt    0.0266    0.7988    0.8750
Pt    0.1210    0.9958    0.8736
Pt    0.4724    0.2260    0.1001
Pt    0.4718    0.2241    0.0479
Pt    0.4476    0.1966    0.9994
Pt    0.4726    0.1718    0.0973
Pt    0.4755    0.1743    0.0501
Pt    0.3980    0.0962    0.9985
Pt    0.4750    0.1241    0.0993
Pt    0.4750    0.1216    0.0499
Pt    0.2513    0.2451    0.0504
Pt    0.2481    0.0270    0.0243
Pt    0.4743    0.0719    0.0962
Pt    0.4727    0.0740    0.0491
Pt    0.3220    0.0028    0.0209
Pt    0.4739    0.0231    0.0982
Pt    0.3976    0.2470    0.9993
Pt    0.3259    0.0003    0.0733
Pt    0.3728    0.0715    0.9991
Pt    0.4962    0.0453    0.9982
Pt    0.2994    0.9997    0.0471
Pt    0.2972    0.0482    0.0483
Pt    0.2959    0.0485    0.0955
Pt    0.3010    0.9987    0.0991
Pt    0.2956    0.1003    0.0469
Pt    0.2957    0.0990    0.0988
Pt    0.4510    0.0010    0.0452
Pt    0.2979    0.1467    0.0466
Pt    0.2932    0.1483    0.0955
Pt    0.4967    0.1758    0.0770
Pt    0.2985    0.1976    0.0456
Pt    0.2967    0.1985    0.0977
Pt    0.4747    0.1699    0.0018
Pt    0.3754    0.9989    0.1209
Pt    0.4472    0.2471    0.0989
Pt    0.4963    0.2454    0.0444
Pt    0.3431    0.0468    0.0492
Pt    0.3491    0.0481    0.0971
Pt    0.3732    0.1237    0.0984
Pt    0.3454    0.0980    0.0472
Pt    0.3487    0.0976    0.0977
Pt    0.3714    0.1197    0.0497
Pt    0.3475    0.1490    0.0490
Pt    0.3466    0.1451    0.0992
Pt    0.3721    0.0758    0.1001
Pt    0.3481    0.1994    0.0494
Pt    0.3510    0.1965    0.0977
Pt    0.3477    0.9983    0.0482
Pt    0.4017    0.0013    0.0953
Pt    0.3710    0.0721    0.0474
Pt    0.3734    0.0243    0.0998
Pt    0.3966    0.0481    0.0478
Pt    0.4001    0.0445    0.1024
Pt    0.3733    0.0239    0.0464
Pt    0.3937    0.0944    0.0500
Pt    0.4007    0.0949    0.1013
Pt    0.3198    0.2257    0.0989
Pt    0.3985    0.1480    0.0470
Pt    0.3964    0.1469    0.0971
Pt    0.3229    0.2229    0.0479
Pt    0.3958    0.1966    0.0494
Pt    0.3986    0.1965    0.0979
Pt    0.4250    0.0703    0.1022
Pt    0.4211    0.0717    0.0494
Pt    0.4231    0.1696    0.9996
Pt    0.3993    0.0006    0.0494
Pt    0.4475    0.0508    0.0502
Pt    0.4490    0.0495    0.0970
Pt    0.3196    0.1732    0.0986
Pt    0.4511    0.0993    0.0479
Pt    0.4479    0.0950    0.1029
Pt    0.3244    0.1732    0.0496
Pt    0.4437    0.1473    0.0493
Pt    0.4464    0.1481    0.0972
Pt    0.2483    0.0473    0.9989
Pt    0.4489    0.1954    0.0478
Pt    0.4480    0.1978    0.0988
Pt    0.4767    0.0212    0.0485
Pt    0.3224    0.1207    0.0985
Pt    0.4227    0.2220    0.0973
Pt    0.4230    0.2242    0.0471
Pt    0.3194    0.1235    0.0463
Pt    0.4197    0.1708    0.0992
Pt    0.4200    0.1728    0.0424
Pt    0.3206    0.0734    0.0985
Pt    0.4237    0.1208    0.0983
Pt    0.4255    0.1181    0.0491
Pt    0.2947    0.0258    0.0224
Pt    0.2995    0.0219    0.0705
Pt    0.2997    0.0723    0.0225
Pt    0.2944    0.0734    0.0710
Pt    0.2933    0.1221    0.0230
Pt    0.2973    0.1227    0.0728
Pt    0.2971    0.1734    0.0213
Pt    0.2971    0.1735    0.0722
Pt    0.2984    0.2223    0.0248
Pt    0.2968    0.2233    0.0702
Pt    0.3487    0.0244    0.0242
Pt    0.3487    0.0233    0.0728
Pt    0.3452    0.0728    0.0215
Pt    0.3478    0.0733    0.0735
Pt    0.3484    0.1228    0.0240
Pt    0.3438    0.1233    0.0741
Pt    0.3494    0.1749    0.0216
Pt    0.3471    0.1705    0.0764
Pt    0.3452    0.2204    0.0215
Pt    0.3439    0.2230    0.0741
Pt    0.4004    0.0240    0.0233
Pt    0.3967    0.0248    0.0728
Pt    0.3983    0.0735    0.0224
Pt    0.3940    0.0733    0.0773
Pt    0.3995    0.1185    0.0268
Pt    0.3984    0.1242    0.0703
Pt    0.3951    0.1754    0.0211
Pt    0.3969    0.1717    0.0731
Pt    0.3987    0.2203    0.0238
Pt    0.3997    0.2251    0.0711
Pt    0.4456    0.0263    0.0240
Pt    0.4519    0.0231    0.0722
Pt    0.4491    0.0727    0.0222
Pt    0.4458    0.0758    0.0727
Pt    0.4504    0.1223    0.0226
Pt    0.4472    0.1210    0.0739
Pt    0.4489    0.1717    0.0239
Pt    0.4469    0.1730    0.0729
Pt    0.4479    0.2233    0.0250
Pt    0.4446    0.2237    0.0719
Pt    0.4295    0.0220    0.0982
Pt    0.4240    0.0265    0.0494
Pt    0.2715    0.0500    0.0253
Pt    0.2718    0.0493    0.0740
Pt    0.2692    0.0987    0.0211
Pt    0.2697    0.0986    0.0726
Pt    0.2729    0.1489    0.0232
Pt    0.2694    0.1483    0.0732
Pt    0.2716    0.1991    0.0189
Pt    0.2741    0.1969    0.0704
Pt    0.2489    0.2010    0.0467
Pt    0.3202    0.0743    0.0478
Pt    0.3231    0.0473    0.0212
Pt    0.3221    0.0507    0.0741
Pt    0.3203    0.0981    0.0219
Pt    0.3197    0.0965    0.0715
Pt    0.3268    0.1498    0.0214
Pt    0.3197    0.1472    0.0786
Pt    0.3228    0.1955    0.0194
Pt    0.3207    0.1999    0.0734
Pt    0.3757    0.2210    0.0967
Pt    0.3701    0.2231    0.0476
Pt    0.3751    0.0494    0.0237
Pt    0.3735    0.0477    0.0734
Pt    0.3709    0.0985    0.0220
Pt    0.3744    0.1007    0.0762
Pt    0.3762    0.1463    0.0222
Pt    0.3730    0.1478    0.0702
Pt    0.3724    0.1995    0.0238
Pt    0.3731    0.1979    0.0712
Pt    0.3226    0.0234    0.0982
Pt    0.3738    0.1706    0.1009
Pt    0.4207    0.0495    0.0217
Pt    0.4189    0.0491    0.0759
Pt    0.4250    0.0951    0.0209
Pt    0.4203    0.0956    0.0739
Pt    0.4240    0.1435    0.0213
Pt    0.4214    0.1474    0.0743
Pt    0.4232    0.1976    0.0214
Pt    0.4237    0.1975    0.0739
Pt    0.3729    0.1728    0.0476
Pt    0.3215    0.0247    0.0459
Pt    0.4729    0.0479    0.0244
Pt    0.4746    0.0478    0.0707
Pt    0.4748    0.0941    0.0205
Pt    0.4722    0.0970    0.0758
Pt    0.4733    0.1462    0.0267
Pt    0.4743    0.1466    0.0743
Pt    0.4743    0.1998    0.0264
Pt    0.4721    0.2008    0.0743
Pt    0.3479    0.0985    0.0008
Pt    0.2719    0.0211    0.0478
Pt    0.2699    0.0251    0.0959
Pt    0.4481    0.1232    0.1218
Pt    0.2698    0.0728    0.0502
Pt    0.2690    0.0774    0.0965
Pt    0.3477    0.2468    0.1021
Pt    0.2697    0.1230    0.0475
Pt    0.2741    0.1229    0.0995
Pt    0.4251    0.0006    0.0706
Pt    0.2739    0.1710    0.0483
Pt    0.2715    0.1749    0.0977
Pt    0.4231    0.1224    0.9982
Pt    0.2753    0.2264    0.0474
Pt    0.2752    0.2242    0.0994
Pt    0.3741    0.2245    0.9990
Pt    0.2733    0.2471    0.0215
Pt    0.3995    0.0014    0.9993
Pt    0.3225    0.2453    0.0216
Pt    0.3757    0.1225    0.9983
Pt    0.4248    0.9989    0.0250
Pt    0.3714    0.9997    0.0743
Pt    0.4974    0.0496    0.0468
Pt    0.3188    0.0985    0.1224
Pt    0.2948    0.0268    0.1187
Pt    0.3981    0.2472    0.0476
Pt    0.4739    0.0224    0.9991
Pt    0.2483    0.2480    0.9985
Pt    0.2726    0.0719    0.9989
Pt    0.2486    0.2236    0.0755
Pt    0.2482    0.2244    0.1220
Pt    0.4220    0.1976    0.1222
Pt    0.4451    0.2479    0.0462
Pt    0.3704    0.2479    0.0232
Pt    0.2956    0.1716    0.1213
Pt    0.3714    0.0995    0.1211
Pt    0.3472    0.1218    0.1225
Pt    0.3201    0.1238    0.9992
Pt    0.4949    0.2003    0.1002
Pt    0.4970    0.2252    0.0733
Pt    0.4211    0.2455    0.0211
Pt    0.3478    0.2456    0.0512
Pt    0.2661    0.0510    0.1227
Pt    0.3465    0.0252    0.1221
Pt    0.2706    0.1500    0.1214
Pt    0.2944    0.0726    0.1219
Pt    0.3433    0.0727    0.1210
Pt    0.4472    0.2226    0.1205
Pt    0.3453    0.1715    0.1226
Pt    0.4697    0.1963    0.1213
Pt    0.3227    0.0471    0.1216
Pt    0.3477    0.2221    0.1226
Pt    0.4245    0.9997    0.1227
Pt    0.3210    0.1457    0.1222
Pt    0.2704    0.0229    0.9987
Pt    0.4500    0.1472    0.9986
Pt    0.4496    0.0468    0.9980
Pt    0.3724    0.0229    0.9989
Pt    0.3221    0.2215    0.9982
Pt    0.4714    0.2266    0.1976
Pt    0.4705    0.2213    0.1467
Pt    0.4705    0.1753    0.1978
Pt    0.2930    0.0010    0.1460
Pt    0.3193    0.1245    0.1964
Pt    0.4481    0.9999    0.1495
Pt    0.2704    0.0984    0.1231
Pt    0.2968    0.0467    0.1475
Pt    0.2968    0.0492    0.1975
Pt    0.2944    0.0976    0.1460
Pt    0.2908    0.1081    0.2004
Pt    0.2943    0.1496    0.1460
Pt    0.2935    0.1477    0.1951
Pt    0.2945    0.1954    0.1471
Pt    0.4934    0.2220    0.2226
Pt    0.4751    0.9989    0.1238
Pt    0.4528    0.0233    0.1231
Pt    0.3474    0.0482    0.1458
Pt    0.3466    0.0523    0.1964
Pt    0.3457    0.0983    0.1466
Pt    0.3444    0.1006    0.1972
Pt    0.3452    0.1489    0.1461
Pt    0.3441    0.1490    0.2004
Pt    0.3451    0.1981    0.1483
Pt    0.3439    0.1939    0.2023
Pt    0.3712    0.1971    0.1244
Pt    0.4965    0.1717    0.1236
Pt    0.3998    0.0481    0.1480
Pt    0.3971    0.0490    0.1970
Pt    0.3978    0.0991    0.1488
Pt    0.3974    0.1003    0.1977
Pt    0.3959    0.1481    0.1493
Pt    0.3950    0.1480    0.2003
Pt    0.3982    0.1968    0.1469
Pt    0.3939    0.1990    0.2014
Pt    0.3215    0.1189    0.1455
Pt    0.4720    0.9989    0.2245
Pt    0.4473    0.0464    0.1477
Pt    0.4444    0.0480    0.1984
Pt    0.4481    0.0999    0.1490
Pt    0.4457    0.0980    0.1992
Pt    0.4478    0.1480    0.1487
Pt    0.4471    0.1490    0.1985
Pt    0.4458    0.1960    0.1467
Pt    0.4458    0.2036    0.2011
Pt    0.4729    0.1750    0.1492
Pt    0.4719    0.1236    0.1974
Pt    0.3447    0.0006    0.1961
Pt    0.4735    0.1236    0.1490
Pt    0.4678    0.0731    0.1978
Pt    0.4964    0.1236    0.2235
Pt    0.2711    0.1979    0.1237
Pt    0.3217    0.0740    0.1949
Pt    0.4713    0.0740    0.1509
Pt    0.3687    0.9996    0.2225
Pt    0.2980    0.0247    0.1727
Pt    0.2951    0.0213    0.2236
Pt    0.4728    0.1475    0.1244
Pt    0.2960    0.0728    0.1708
Pt    0.2988    0.0744    0.2208
Pt    0.4470    0.2482    0.2001
Pt    0.2964    0.1255    0.1703
Pt    0.2936    0.1227    0.2306
Pt    0.3725    0.1449    0.1232
Pt    0.2945    0.1733    0.1714
Pt    0.2496    0.0507    0.1972
Pt    0.3477    0.9988    0.2448
Pt    0.3721    0.0508    0.1230
Pt    0.3484    0.0256    0.1742
Pt    0.3440    0.0244    0.2210
Pt    0.3981    0.0722    0.1240
Pt    0.3457    0.0760    0.1709
Pt    0.3459    0.0787    0.2222
Pt    0.4968    0.0498    0.1502
Pt    0.3452    0.1233    0.1721
Pt    0.3442    0.1235    0.2240
Pt    0.4270    0.0444    0.1232
Pt    0.3438    0.1735    0.1727
Pt    0.3457    0.1697    0.2264
Pt    0.4229    0.2472    0.1231
Pt    0.3472    0.2185    0.1742
Pt    0.4730    0.0465    0.1232
Pt    0.3967    0.0240    0.1724
Pt    0.3959    0.0220    0.2204
Pt    0.4228    0.2223    0.1475
Pt    0.3978    0.0701    0.1744
Pt    0.3957    0.0749    0.2211
Pt    0.4194    0.1758    0.1986
Pt    0.3954    0.1235    0.1719
Pt    0.3965    0.1220    0.2242
Pt    0.4218    0.1723    0.1486
Pt    0.3956    0.1743    0.1735
Pt    0.3930    0.1714    0.2248
Pt    0.4220    0.1259    0.2008
Pt    0.3978    0.2277    0.1738
Pt    0.3941    0.2230    0.2230
Pt    0.3981    0.1213    0.1237
Pt    0.4473    0.0229    0.1754
Pt    0.4465    0.0233    0.2223
Pt    0.4002    0.2225    0.1242
Pt    0.4418    0.0737    0.1748
Pt    0.4484    0.0729    0.2251
Pt    0.4240    0.1224    0.1466
Pt    0.4486    0.1249    0.1729
Pt    0.4475    0.1242    0.2229
Pt    0.4214    0.0730    0.1993
Pt    0.4451    0.1748    0.1745
Pt    0.4456    0.1710    0.2250
Pt    0.4951    0.1997    0.1979
Pt    0.4464    0.2264    0.1724
Pt    0.4461    0.2281    0.2263
Pt    0.2748    0.0744    0.2477
Pt    0.4935    0.0718    0.2221
Pt    0.4964    0.0484    0.1971
Pt    0.3987    0.9997    0.2461
Pt    0.2724    0.0469    0.1708
Pt    0.2735    0.0497    0.2225
Pt    0.4222    0.0709    0.1486
Pt    0.2742    0.0981    0.1726
Pt    0.2691    0.0953    0.2220
Pt    0.4193    0.0250    0.1981
Pt    0.2692    0.1472    0.1741
Pt    0.4225    0.0221    0.1502
Pt    0.3697    0.0257    0.2446
Pt    0.3212    0.0209    0.1995
Pt    0.3190    0.1707    0.1951
Pt    0.2966    0.0004    0.1974
Pt    0.3726    0.2215    0.1959
Pt    0.3221    0.0497    0.1720
Pt    0.3213    0.0482    0.2207
Pt    0.3256    0.0254    0.1488
Pt    0.3153    0.0992    0.1720
Pt    0.3193    0.1012    0.2241
Pt    0.3712    0.2250    0.1494
Pt    0.3189    0.1489    0.1708
Pt    0.3196    0.1470    0.2240
Pt    0.3699    0.1727    0.1980
Pt    0.3186    0.1950    0.1735
Pt    0.4939    0.0966    0.2000
Pt    0.3208    0.0740    0.1472
Pt    0.2719    0.0010    0.1729
Pt    0.3698    0.1709    0.1481
Pt    0.3723    0.0486    0.1723
Pt    0.3685    0.0497    0.2227
Pt    0.3694    0.1252    0.1976
Pt    0.3707    0.0972    0.1732
Pt    0.3707    0.1021    0.2231
Pt    0.4973    0.1240    0.1765
Pt    0.3676    0.1471    0.1712
Pt    0.3678    0.1473    0.2239
Pt    0.3682    0.1212    0.1488
Pt    0.3734    0.1975    0.1714
Pt    0.3668    0.1965    0.2247
Pt    0.3208    0.1732    0.1478
Pt    0.2691    0.1723    0.1459
Pt    0.4951    0.2228    0.1734
Pt    0.2666    0.1280    0.2063
Pt    0.4227    0.0479    0.1738
Pt    0.4219    0.0500    0.2233
Pt    0.3704    0.0758    0.1998
Pt    0.4229    0.1019    0.1744
Pt    0.4207    0.0996    0.2216
Pt    0.3735    0.0743    0.1505
Pt    0.4184    0.1497    0.1764
Pt    0.4208    0.1489    0.2288
Pt    0.3696    0.0247    0.1989
Pt    0.4195    0.1994    0.1746
Pt    0.4210    0.1963    0.2245
Pt    0.4736    0.0225    0.1975
Pt    0.4754    0.0221    0.1493
Pt    0.4187    0.2247    0.2002
Pt    0.3478    0.9997    0.1516
Pt    0.4723    0.0478    0.1755
Pt    0.4695    0.0489    0.2230
Pt    0.4965    0.2234    0.1274
Pt    0.4695    0.0986    0.1765
Pt    0.4706    0.0991    0.2248
Pt    0.3744    0.0215    0.1485
Pt    0.4719    0.1502    0.1733
Pt    0.4727    0.1499    0.2228
Pt    0.3202    0.2227    0.1510
Pt    0.4682    0.2002    0.1728
Pt    0.4695    0.1977    0.2218
Pt    0.2721    0.0264    0.1452
Pt    0.2724    0.0260    0.1955
Pt    0.2711    0.0733    0.1471
Pt    0.2737    0.0742    0.1958
Pt    0.2702    0.1245    0.1489
Pt    0.4762    0.0974    0.1248
Pt    0.4967    0.0729    0.1749
Pt    0.4008    0.0202    0.1263
Pt    0.4949    0.1976    0.1493
Pt    0.4969    0.2458    0.2010
Pt    0.3959    0.0496    0.2474
Pt    0.3965    0.2468    0.1465
Pt    0.4240    0.0259    0.2476
Pt    0.4973    0.1719    0.1735
Pt    0.4956    0.1481    0.1999
Pt    0.3945    0.1725    0.1256
Pt    0.4473    0.1712    0.1263
Pt    0.4243    0.0945    0.1254
Pt    0.4498    0.0704    0.1236
Pt    0.3229    0.2467    0.1251
Pt    0.3226    0.0777    0.2468
Pt    0.3225    0.0007    0.1261
Pt    0.2979    0.2238    0.1272
Pt    0.3425    0.0516    0.2461
Pt    0.2985    0.0503    0.2432
Pt    0.2481    0.0479    0.2434
Pt    0.2962    0.1237    0.1232
Pt    0.3956    0.0970    0.2459
Pt    0.4210    0.1475    0.1245
Pt    0.4453    0.2006    0.2473
Pt    0.3219    0.1994    0.1236
Pt    0.4003    0.9987    0.3503
Pt    0.3243    1.0000    0.2721
Pt    0.3944    0.1476    0.2522
Pt    0.3706    0.9994    0.3241
Pt    0.4735    0.0734    0.2497
Pt    0.4751    0.1243    0.2975
Pt    0.4728    0.2212    0.3482
Pt    0.4716    0.2252    0.2937
Pt    0.4227    0.0012    0.2748
Pt    0.4729    0.1748    0.3482
Pt    0.3732    0.0010    0.2715
Pt    0.3965    0.0002    0.2972
Pt    0.4460    0.2247    0.3710
Pt    0.2483    0.0483    0.3515
Pt    0.2970    0.0493    0.2957
Pt    0.3009    0.0482    0.3496
Pt    0.2947    0.0012    0.2505
Pt    0.3021    0.0978    0.3475
Pt    0.2974    0.0992    0.2500
Pt    0.4243    0.2210    0.3461
Pt    0.4975    0.2229    0.2712
Pt    0.4705    0.0075    0.3253
Pt    0.3473    0.0516    0.2991
Pt    0.3521    0.0470    0.3500
Pt    0.2511    0.0742    0.3273
Pt    0.3432    0.1014    0.3003
Pt    0.3231    0.0952    0.3224
Pt    0.4752    0.9999    0.2751
Pt    0.4175    0.2248    0.2998
Pt    0.3718    0.1202    0.2499
Pt    0.3009    0.0017    0.3457
Pt    0.4506    0.0094    0.3542
Pt    0.3963    0.0508    0.2981
Pt    0.3976    0.0473    0.3482
Pt    0.4698    0.2220    0.2499
Pt    0.3964    0.0975    0.2987
Pt    0.4412    0.2466    0.2956
Pt    0.3956    0.1511    0.3003
Pt    0.2484    0.0038    0.3482
Pt    0.4434    0.2481    0.2516
Pt    0.3253    0.0018    0.3257
Pt    0.3722    0.1720    0.2507
Pt    0.3230    0.1289    0.2532
Pt    0.4465    0.0537    0.2988
Pt    0.4495    0.1472    0.2502
Pt    0.4462    0.0989    0.2972
Pt    0.4239    0.1776    0.3435
Pt    0.4453    0.1488    0.2967
Pt    0.4454    0.1471    0.3484
Pt    0.3950    0.2458    0.3476
Pt    0.4463    0.2003    0.2956
Pt    0.4502    0.1994    0.3445
Pt    0.4494    0.9996    0.2508
Pt    0.4255    0.0003    0.3258
Pt    0.3718    0.0737    0.3497
Pt    0.4727    0.1713    0.2981
Pt    0.2497    0.0766    0.2738
Pt    0.4711    0.1252    0.3450
Pt    0.2958    0.0278    0.2712
Pt    0.2981    0.0234    0.3205
Pt    0.2984    0.0733    0.2710
Pt    0.2989    0.0684    0.3225
Pt    0.3482    0.0250    0.2703
Pt    0.3492    0.0255    0.3230
Pt    0.3477    0.0728    0.2741
Pt    0.3471    0.0713    0.3260
Pt    0.3473    0.1241    0.2770
Pt    0.3964    0.0250    0.2707
Pt    0.3971    0.0227    0.3211
Pt    0.3946    0.0716    0.2724
Pt    0.3947    0.0752    0.3255
Pt    0.3961    0.1226    0.2748
Pt    0.3979    0.1177    0.3224
Pt    0.3942    0.1752    0.2753
Pt    0.4473    0.0234    0.2739
Pt    0.4455    0.0296    0.3267
Pt    0.4485    0.0748    0.2732
Pt    0.4484    0.0697    0.3257
Pt    0.4497    0.1220    0.2727
Pt    0.4452    0.1212    0.3201
Pt    0.4448    0.1725    0.2727
Pt    0.4466    0.1750    0.3216
Pt    0.4421    0.2247    0.2738
Pt    0.4470    0.2248    0.3220
Pt    0.3496    0.1473    0.2533
Pt    0.4188    0.0747    0.2981
Pt    0.2688    0.0501    0.2700
Pt    0.2739    0.0477    0.3299
Pt    0.2772    0.0999    0.3202
Pt    0.4189    0.1230    0.2498
Pt    0.4242    0.0266    0.3523
Pt    0.3239    0.0482    0.2742
Pt    0.3237    0.0469    0.3195
Pt    0.3197    0.1030    0.2737
Pt    0.4192    0.1732    0.2997
Pt    0.4213    0.1212    0.2984
Pt    0.3716    0.0491    0.2690
Pt    0.3731    0.0491    0.3236
Pt    0.3706    0.0983    0.2733
Pt    0.3709    0.0976    0.3223
Pt    0.3738    0.1489    0.2762
Pt    0.4738    0.0725    0.2986
Pt    0.3725    0.0244    0.3000
Pt    0.4218    0.0475    0.2759
Pt    0.4212    0.0525    0.3266
Pt    0.4219    0.0980    0.2732
Pt    0.4238    0.0920    0.3253
Pt    0.4216    0.1470    0.2755
Pt    0.4210    0.1445    0.3236
Pt    0.4225    0.1960    0.2721
Pt    0.4227    0.2005    0.3192
Pt    0.2527    0.0997    0.3462
Pt    0.3711    0.0755    0.2993
Pt    0.4711    0.0465    0.2729
Pt    0.4768    0.0466    0.3233
Pt    0.4736    0.0980    0.2747
Pt    0.4713    0.0984    0.3216
Pt    0.4735    0.1500    0.2720
Pt    0.4707    0.1487    0.3227
Pt    0.4715    0.2007    0.2719
Pt    0.4730    0.2014    0.3179
Pt    0.4954    0.0961    0.3466
Pt    0.2721    0.0258    0.2967
Pt    0.2743    0.0237    0.3521
Pt    0.4248    0.0267    0.3022
Pt    0.2753    0.0748    0.2985
Pt    0.2794    0.0762    0.3502
Pt    0.2778    0.1264    0.3478
Pt    0.4178    0.2228    0.2504
Pt    0.4696    0.0269    0.2983
Pt    0.3251    0.0222    0.2983
Pt    0.3271    0.0222    0.3510
Pt    0.3725    0.1254    0.3017
Pt    0.3219    0.0748    0.2952
Pt    0.3238    0.0703    0.3491
Pt    0.4748    0.2434    0.3215
Pt    0.3754    0.0192    0.3509
Pt    0.4952    0.1466    0.3441
Pt    0.4965    0.0447    0.3496
Pt    0.4470    0.9998    0.2993
Pt    0.3503    0.0001    0.2957
Pt    0.4467    0.0989    0.2490
Pt    0.2502    0.1774    0.3719
Pt    0.4971    0.1749    0.2731
Pt    0.4973    0.2450    0.3450
Pt    0.4708    0.1495    0.3709
Pt    0.2484    0.0520    0.2979
Pt    0.2985    0.1239    0.3697
Pt    0.2547    0.1266    0.3248
Pt    0.4730    0.0217    0.2484
Pt    0.2524    0.1268    0.3698
Pt    0.3009    0.9997    0.2960
Pt    0.4223    0.1705    0.2518
Pt    0.4226    0.0707    0.2494
Pt    0.2512    0.1549    0.3480
Pt    0.2534    0.1028    0.2953
Pt    0.3454    0.1005    0.2492
Pt    0.4478    0.0488    0.2494
Pt    0.4939    0.1735    0.3233
Pt    0.4946    0.0470    0.2480
Pt    0.2722    0.0251    0.2483
Pt    0.4968    0.0717    0.3256
Pt    0.2714    0.0023    0.3209
Pt    0.4940    0.1227    0.3722
Pt    0.4954    0.1984    0.3464
Pt    0.3700    0.0757    0.2479
Pt    0.4457    0.1754    0.3699
Pt    0.4204    0.1962    0.3703
Pt    0.3006    0.0216    0.3717
Pt    0.3997    0.2241    0.3714
Pt    0.4710    0.1977    0.3716
Pt    0.3196    0.0204    0.2494
Pt    0.4964    0.2465    0.2490
Pt    0.4718    0.1731    0.2489
Pt    0.3249    0.0470    0.3727
Pt    0.2498    0.0743    0.3726
Pt    0.4966    0.1484    0.2486
Pt    0.3972    0.1952    0.2479
Pt    0.4722    0.1226    0.2481
Pt    0.3526    0.0266    0.3745
Pt    0.2484    0.0225    0.3762
Pt    0.3220    0.9998    0.4281
Pt    0.2988    0.0688    0.3779
Pt    0.4708    0.2181    0.4488
Pt    0.4676    0.2238    0.3954
Pt    0.4735    0.1719    0.3956
Pt    0.4245    0.2241    0.4460
Pt    0.4238    0.2228    0.3973
Pt    0.4694    0.1708    0.4932
Pt    0.2991    0.0011    0.3980
Pt    0.2738    0.0494    0.3760
Pt    0.2995    0.0462    0.4018
Pt    0.3027    0.0513    0.4513
Pt    0.2985    0.0977    0.3953
Pt    0.3008    0.0988    0.4479
Pt    0.2987    0.1500    0.4003
Pt    0.2967    0.1460    0.4459
Pt    0.2970    0.1983    0.4488
Pt    0.2509    0.1029    0.3958
Pt    0.3771    0.9996    0.4256
Pt    0.3526    0.0479    0.4016
Pt    0.3458    0.1518    0.4467
Pt    0.3448    0.1963    0.4464
Pt    0.2479    0.0724    0.4717
Pt    0.3967    0.2021    0.3991
Pt    0.3963    0.1965    0.4424
Pt    0.4494    0.1936    0.3977
Pt    0.4457    0.1919    0.4413
Pt    0.3984    0.0237    0.3741
Pt    0.4964    0.1714    0.4229
Pt    0.2496    0.1196    0.4748
Pt    0.3708    0.2214    0.4435
Pt    0.3705    0.2249    0.3943
Pt    0.3266    0.9994    0.3749
Pt    0.3714    0.1723    0.4457
Pt    0.3725    0.0198    0.3965
Pt    0.2737    0.0008    0.4234
Pt    0.3223    0.2218    0.4473
Pt    0.3222    0.1750    0.4473
Pt    0.2499    0.1240    0.4233
Pt    0.3983    0.9990    0.3986
Pt    0.4711    0.2458    0.4228
Pt    0.4231    0.0009    0.3755
Pt    0.2982    0.0259    0.4306
Pt    0.3018    0.0243    0.4738
Pt    0.3972    0.2472    0.3963
Pt    0.2984    0.0750    0.4229
Pt    0.3014    0.0743    0.4737
Pt    0.3949    0.1445    0.4945
Pt    0.3006    0.1232    0.4234
Pt    0.3011    0.1257    0.4746
Pt    0.2972    0.1759    0.4225
Pt    0.2969    0.1691    0.4703
Pt    0.3018    0.2229    0.4207
Pt    0.2977    0.2242    0.4728
Pt    0.2495    0.1769    0.4229
Pt    0.3506    0.0219    0.4227
Pt    0.3013    0.0475    0.4966
Pt    0.3468    0.1221    0.4701
Pt    0.3463    0.1730    0.4736
Pt    0.3443    0.2222    0.4189
Pt    0.3483    0.2245    0.4705
Pt    0.2486    0.1754    0.4737
Pt    0.3954    0.1733    0.4692
Pt    0.3777    0.0491    0.3763
Pt    0.3972    0.2247    0.4227
Pt    0.3956    0.2245    0.4668
Pt    0.2753    0.9983    0.4756
Pt    0.4467    0.1714    0.4712
Pt    0.3003    0.0001    0.4506
Pt    0.4454    0.2228    0.4216
Pt    0.4489    0.2238    0.4742
Pt    0.4974    0.1946    0.4456
Pt    0.3509    0.0707    0.3773
Pt    0.4004    0.1982    0.4909
Pt    0.4227    0.1731    0.4969
Pt    0.2747    0.0474    0.4210
Pt    0.2771    0.0499    0.4733
Pt    0.2486    0.0240    0.4226
Pt    0.2749    0.1010    0.4224
Pt    0.2746    0.0969    0.4719
Pt    0.2506    0.1475    0.3960
Pt    0.2749    0.1496    0.4217
Pt    0.2712    0.1494    0.4725
Pt    0.2735    0.2005    0.4202
Pt    0.2732    0.1985    0.4728
Pt    0.3219    0.1247    0.4466
Pt    0.3191    0.1247    0.3929
Pt    0.3242    0.0229    0.3975
Pt    0.2751    0.2243    0.4430
Pt    0.3246    0.0475    0.4233
Pt    0.3315    0.0480    0.4740
Pt    0.2478    0.1488    0.4504
Pt    0.3252    0.1017    0.4212
Pt    0.3248    0.0963    0.4706
Pt    0.3261    0.1560    0.4218
Pt    0.3225    0.1504    0.4696
Pt    0.3241    0.1956    0.4203
Pt    0.3223    0.1995    0.4726
Pt    0.3276    0.0741    0.4448
Pt    0.3266    0.0730    0.3993
Pt    0.3251    0.0932    0.3737
Pt    0.3690    0.1489    0.4723
Pt    0.3673    0.1951    0.4208
Pt    0.3707    0.1976    0.4701
Pt    0.3319    0.0263    0.4499
Pt    0.3474    0.2457    0.4442
Pt    0.4238    0.1978    0.4186
Pt    0.4218    0.1938    0.4664
Pt    0.2492    0.0764    0.4237
Pt    0.2718    0.2253    0.4979
Pt    0.3253    0.9997    0.4734
Pt    0.4707    0.1966    0.4214
Pt    0.4729    0.1959    0.4712
Pt    0.2742    0.0211    0.3975
Pt    0.2734    0.0225    0.4518
Pt    0.2722    0.0760    0.4004
Pt    0.2753    0.0725    0.4465
Pt    0.2768    0.1276    0.3966
Pt    0.2757    0.1210    0.4475
Pt    0.2706    0.1756    0.3991
Pt    0.2740    0.1722    0.4449
Pt    0.4751    0.2449    0.4728
Pt    0.2998    0.0977    0.4974
Pt    0.3477    0.2475    0.4964
Pt    0.3006    0.0002    0.4960
Pt    0.4218    0.2481    0.4709
Pt    0.3738    0.2229    0.4953
Pt    0.2988    0.2463    0.4431
Pt    0.2504    0.2262    0.4713
Pt    0.2484    0.0505    0.3973
Pt    0.3222    0.2252    0.4941
Pt    0.2481    0.0987    0.4464
Pt    0.3736    0.1763    0.4944
Pt    0.3476    0.2005    0.4949
Pt    0.2510    0.2030    0.4465
Pt    0.4498    0.2477    0.4492
Pt    0.2499    0.2459    0.4435
Pt    0.2742    0.1516    0.3740
Pt    0.4237    0.2216    0.4958
Pt    0.2736    0.2467    0.4127
Pt    0.3238    0.2482    0.4176
Pt    0.4473    0.1965    0.4950
Pt    0.3270    0.1178    0.4966
Pt    0.2498    0.2030    0.3945
Pt    0.3278    0.0233    0.4967
Pt    0.3742    0.2476    0.4701
Pt    0.2982    0.2473    0.4945
Pt    0.3232    0.1742    0.4979
Pt    0.2726    0.1238    0.4974
Pt    0.2740    0.0253    0.4967
Pt    0.2973    0.1976    0.4945
Pt    0.3531    0.0954    0.4957
Pt    0.2731    0.0981    0.3729
Pt    0.2733    0.2478    0.4704
Pt    0.4465    0.2481    0.3973
Pt    0.4953    0.2218    0.3736
Pt    0.3731    0.1211    0.4982
Pt    0.2490    0.1717    0.6212
Pt    0.2739    0.1701    0.4986
Pt    0.3726    0.2482    0.5213
Pt    0.3729    0.1473    0.6192
Pt    0.2754    0.0732    0.4994
Pt    0.2515    0.0273    0.5236
Pt    0.2510    0.2003    0.5470
Pt    0.4721    0.2232    0.5973
Pt    0.2499    0.1257    0.5702
Pt    0.4716    0.2215    0.5476
Pt    0.2483    0.1480    0.5933
Pt    0.4951    0.2455    0.5001
Pt    0.4770    0.1741    0.5944
Pt    0.4736    0.1721    0.5478
Pt    0.3253    0.0723    0.4984
Pt    0.3233    0.2479    0.5724
Pt    0.4968    0.1228    0.6190
Pt    0.4959    0.1676    0.5212
Pt    0.3022    0.0452    0.5504
Pt    0.2977    0.0488    0.5978
Pt    0.4248    0.2477    0.5224
Pt    0.2998    0.0980    0.5454
Pt    0.2975    0.0968    0.5970
Pt    0.4742    0.2165    0.4982
Pt    0.2990    0.1477    0.5473
Pt    0.2979    0.1510    0.5969
Pt    0.2495    0.0488    0.5958
Pt    0.2984    0.1993    0.5453
Pt    0.2961    0.1964    0.5950
Pt    0.4716    0.2466    0.5256
Pt    0.3470    0.0486    0.5499
Pt    0.3473    0.0460    0.5984
Pt    0.3257    0.9992    0.5723
Pt    0.3495    0.0965    0.5482
Pt    0.3483    0.0994    0.5945
Pt    0.4231    0.0944    0.6186
Pt    0.3473    0.1462    0.5465
Pt    0.3471    0.1461    0.5959
Pt    0.4222    0.2208    0.5960
Pt    0.3503    0.1988    0.5458
Pt    0.3479    0.1973    0.5962
Pt    0.3995    0.0444    0.5950
Pt    0.3982    0.0971    0.5476
Pt    0.4009    0.0965    0.5947
Pt    0.3971    0.0195    0.6184
Pt    0.4011    0.1490    0.5461
Pt    0.3989    0.1454    0.5955
Pt    0.4229    0.2209    0.5480
Pt    0.3975    0.1958    0.5459
Pt    0.3974    0.1962    0.5956
Pt    0.4522    0.0464    0.5974
Pt    0.4485    0.0993    0.5444
Pt    0.4489    0.0958    0.5942
Pt    0.4481    0.1468    0.5422
Pt    0.4488    0.1522    0.5976
Pt    0.3518    0.0022    0.4983
Pt    0.4495    0.1962    0.5458
Pt    0.4484    0.1996    0.5977
Pt    0.3238    0.1491    0.6202
Pt    0.2483    0.0211    0.5750
Pt    0.3998    0.1207    0.6205
Pt    0.3748    0.1237    0.5438
Pt    0.3966    0.1727    0.6215
Pt    0.2999    0.2476    0.5951
Pt    0.4244    0.0673    0.5948
Pt    0.4740    0.1201    0.5952
Pt    0.4740    0.1209    0.5475
Pt    0.4775    0.0711    0.5936
Pt    0.2996    0.0244    0.5218
Pt    0.2980    0.0220    0.5733
Pt    0.2996    0.0714    0.5217
Pt    0.2977    0.0721    0.5720
Pt    0.2989    0.1232    0.5235
Pt    0.2969    0.1241    0.5736
Pt    0.2997    0.1732    0.5242
Pt    0.2988    0.1727    0.5708
Pt    0.2991    0.2246    0.5213
Pt    0.2976    0.2222    0.5734
Pt    0.3515    0.0241    0.5711
Pt    0.3531    0.0720    0.5209
Pt    0.3520    0.0720    0.5728
Pt    0.3494    0.1220    0.5205
Pt    0.3488    0.1214    0.5689
Pt    0.3473    0.1713    0.5232
Pt    0.3487    0.1729    0.5752
Pt    0.3494    0.2215    0.5212
Pt    0.3489    0.2233    0.5703
Pt    0.3999    0.0711    0.5694
Pt    0.3980    0.1223    0.5213
Pt    0.3970    0.1265    0.5677
Pt    0.3969    0.1710    0.5203
Pt    0.3992    0.1722    0.5715
Pt    0.3996    0.2233    0.5197
Pt    0.3981    0.2233    0.5709
Pt    0.4493    0.0732    0.5737
Pt    0.4477    0.1232    0.5718
Pt    0.4484    0.1725    0.5185
Pt    0.4502    0.1749    0.5736
Pt    0.4488    0.2222    0.5204
Pt    0.4481    0.2219    0.5739
Pt    0.4949    0.0446    0.5986
Pt    0.4218    0.0743    0.5467
Pt    0.2753    0.0504    0.5250
Pt    0.2745    0.0469    0.5716
Pt    0.2750    0.0963    0.5229
Pt    0.2724    0.1011    0.5743
Pt    0.2747    0.1490    0.5226
Pt    0.2743    0.1487    0.5734
Pt    0.2724    0.2007    0.5194
Pt    0.2718    0.1969    0.5711
Pt    0.3721    0.2216    0.5969
Pt    0.2509    0.1752    0.5233
Pt    0.3280    0.0457    0.5217
Pt    0.3241    0.0501    0.5741
Pt    0.3256    0.0977    0.5216
Pt    0.3256    0.0975    0.5712
Pt    0.3256    0.1446    0.5215
Pt    0.3241    0.1475    0.5712
Pt    0.3258    0.1979    0.5225
Pt    0.3246    0.1997    0.5698
Pt    0.3766    0.0478    0.5701
Pt    0.3737    0.0980    0.5236
Pt    0.3743    0.0971    0.5694
Pt    0.3729    0.1476    0.5212
Pt    0.3717    0.1497    0.5697
Pt    0.3755    0.1972    0.5186
Pt    0.3745    0.1986    0.5707
Pt    0.4244    0.0960    0.5725
Pt    0.4213    0.1458    0.5161
Pt    0.4252    0.1457    0.5681
Pt    0.4249    0.1961    0.5224
Pt    0.4241    0.1969    0.5701
Pt    0.3737    0.1717    0.5976
Pt    0.3489    0.0004    0.5980
Pt    0.2489    0.0982    0.5467
Pt    0.4771    0.0960    0.5679
Pt    0.4716    0.1463    0.5230
Pt    0.4746    0.1466    0.5724
Pt    0.4736    0.1930    0.5230
Pt    0.4747    0.2001    0.5697
Pt    0.3726    0.1213    0.5948
Pt    0.2757    0.0213    0.5471
Pt    0.2743    0.0230    0.5965
Pt    0.4958    0.1462    0.5475
Pt    0.2741    0.0743    0.5480
Pt    0.2724    0.0736    0.5989
Pt    0.4252    0.1759    0.5977
Pt    0.2754    0.1242    0.5465
Pt    0.2726    0.1233    0.5978
Pt    0.4233    0.1723    0.5455
Pt    0.2731    0.1718    0.5463
Pt    0.2725    0.1739    0.5956
Pt    0.3004    0.1472    0.4986
Pt    0.2732    0.2250    0.5475
Pt    0.2743    0.2226    0.5982
Pt    0.3715    0.1750    0.5498
Pt    0.3251    0.0215    0.5470
Pt    0.3217    0.0240    0.5979
Pt    0.4240    0.1229    0.5937
Pt    0.3232    0.0731    0.5474
Pt    0.3234    0.0750    0.5952
Pt    0.3751    0.0949    0.6201
Pt    0.3246    0.1215    0.5471
Pt    0.3210    0.1228    0.5978
Pt    0.3756    0.2232    0.5429
Pt    0.3238    0.1724    0.5487
Pt    0.3232    0.1771    0.6014
Pt    0.4237    0.1210    0.5436
Pt    0.3232    0.2247    0.5459
Pt    0.3256    0.2215    0.5972
Pt    0.3735    0.0254    0.5946
Pt    0.3731    0.0706    0.5463
Pt    0.3755    0.0709    0.5975
Pt    0.3252    0.0022    0.5201
Pt    0.3979    0.2239    0.6212
Pt    0.3469    0.0765    0.6222
Pt    0.2481    0.0720    0.5225
Pt    0.3483    0.2479    0.5471
Pt    0.2768    0.0004    0.5223
Pt    0.4953    0.2234    0.5748
Pt    0.3981    0.2462    0.5491
Pt    0.3010    0.2200    0.6194
Pt    0.4216    0.1484    0.6207
Pt    0.4472    0.2465    0.5487
Pt    0.2721    0.2465    0.5749
Pt    0.3237    0.2473    0.6200
Pt    0.2743    0.2439    0.6219
Pt    0.3502    0.1239    0.6204
Pt    0.3500    0.1723    0.6223
Pt    0.4493    0.0733    0.6217
Pt    0.4712    0.1527    0.6199
Pt    0.2746    0.1497    0.6216
Pt    0.4238    0.1997    0.6213
Pt    0.3986    0.0694    0.6224
Pt    0.4261    0.0449    0.6215
Pt    0.4485    0.1223    0.6173
Pt    0.4739    0.0970    0.6178
Pt    0.2481    0.2472    0.5994
Pt    0.4753    0.2460    0.6226
Pt    0.2501    0.9985    0.5487
Pt    0.2737    0.0458    0.6219
Pt    0.4244    0.2455    0.5754
Pt    0.3491    0.2228    0.6212
Pt    0.3237    0.0005    0.6219
Pt    0.4487    0.1752    0.6221
Pt    0.2965    0.1235    0.6180
Pt    0.2710    0.1976    0.6225
Pt    0.2479    0.0989    0.5964
Pt    0.2478    0.1524    0.5004
Pt    0.2485    0.1251    0.5245
Pt    0.3733    0.2471    0.6193
Pt    0.3467    0.2473    0.5965
Pt    0.3259    0.1002    0.6225
Pt    0.2961    0.1726    0.6223
Pt    0.4732    0.0475    0.6227
Pt    0.2961    0.0739    0.6221
Pt    0.3714    0.0443    0.6226
Pt    0.3463    0.1482    0.4981
Pt    0.2523    0.0955    0.4984
Pt    0.2751    0.0003    0.6233
Pt    0.3503    0.2474    0.6977
Pt    0.4752    0.2211    0.6980
Pt    0.4739    0.2231    0.6481
Pt    0.4707    0.1737    0.6973
Pt    0.4757    0.1732    0.6472
Pt    0.4723    0.1197    0.6949
Pt    0.4732    0.1251    0.6405
Pt    0.4711    0.0764    0.6956
Pt    0.4933    0.9988    0.6484
Pt    0.2965    0.2457    0.6987
Pt    0.2487    0.0482    0.6959
Pt    0.2973    0.0429    0.6505
Pt    0.3005    0.0468    0.6958
Pt    0.2998    0.0972    0.6501
Pt    0.2986    0.0961    0.6963
Pt    0.2995    0.1441    0.6479
Pt    0.2974    0.1482    0.6948
Pt    0.2967    0.1974    0.6450
Pt    0.2968    0.1965    0.6951
Pt    0.2489    0.0510    0.6452
Pt    0.3003    0.2473    0.6457
Pt    0.3479    0.0494    0.6472
Pt    0.3493    0.0475    0.6965
Pt    0.3507    0.0978    0.6505
Pt    0.3501    0.0991    0.6990
Pt    0.3496    0.1464    0.6460
Pt    0.3495    0.1469    0.6961
Pt    0.3474    0.2002    0.6496
Pt    0.3456    0.1968    0.6971
Pt    0.4489    0.2477    0.6973
Pt    0.2493    0.1519    0.6483
Pt    0.3943    0.0452    0.6461
Pt    0.3975    0.0458    0.6942
Pt    0.3994    0.0999    0.6440
Pt    0.3994    0.0970    0.6940
Pt    0.3984    0.1471    0.6454
Pt    0.3969    0.1454    0.6949
Pt    0.3975    0.1992    0.6466
Pt    0.3963    0.1935    0.6950
Pt    0.2478    0.9988    0.6442
Pt    0.4456    0.0462    0.6462
Pt    0.4458    0.0439    0.6971
Pt    0.4486    0.1010    0.6417
Pt    0.4465    0.0985    0.6924
Pt    0.4471    0.1490    0.6476
Pt    0.4493    0.1499    0.6957
Pt    0.4497    0.2024    0.6490
Pt    0.4476    0.1987    0.6978
Pt    0.3208    0.2475    0.6747
Pt    0.4703    0.0694    0.6470
Pt    0.4723    0.0212    0.6952
Pt    0.4672    0.0207    0.6446
Pt    0.4237    0.2229    0.6993
Pt    0.4214    0.2250    0.6485
Pt    0.4250    0.1745    0.6938
Pt    0.4210    0.1723    0.6452
Pt    0.4229    0.1234    0.6950
Pt    0.4238    0.1246    0.6431
Pt    0.4218    0.0702    0.6974
Pt    0.4231    0.0729    0.6457
Pt    0.4218    0.0175    0.6925
Pt    0.4205    0.0216    0.6452
Pt    0.4961    0.1663    0.7227
Pt    0.2494    0.2217    0.6726
Pt    0.3010    0.0177    0.6733
Pt    0.2964    0.0193    0.7174
Pt    0.3972    0.9988    0.6473
Pt    0.2968    0.0698    0.6702
Pt    0.3019    0.0714    0.7239
Pt    0.3968    0.2469    0.6967
Pt    0.2993    0.1198    0.6728
Pt    0.2994    0.1215    0.7191
Pt    0.3465    0.2459    0.6503
Pt    0.2993    0.1719    0.6680
Pt    0.2972    0.1732    0.7209
Pt    0.3717    0.1730    0.6476
Pt    0.2981    0.2225    0.6729
Pt    0.2948    0.2238    0.7231
Pt    0.3737    0.2463    0.7222
Pt    0.3476    0.0219    0.6716
Pt    0.3495    0.0224    0.7223
Pt    0.2728    0.1751    0.7454
Pt    0.3481    0.0710    0.6753
Pt    0.3441    0.0744    0.7221
Pt    0.2507    0.1724    0.6739
Pt    0.3478    0.1214    0.6733
Pt    0.3485    0.1226    0.7258
Pt    0.2499    0.0763    0.6709
Pt    0.3488    0.1733    0.6741
Pt    0.3483    0.1745    0.7201
Pt    0.3742    0.1210    0.6986
Pt    0.3480    0.2228    0.6732
Pt    0.3473    0.2232    0.7207
Pt    0.2483    0.0737    0.7225
Pt    0.3958    0.0204    0.6730
Pt    0.4005    0.0220    0.7197
Pt    0.2485    0.0224    0.7262
Pt    0.3978    0.0733    0.6710
Pt    0.3977    0.0712    0.7256
Pt    0.2717    0.2473    0.6733
Pt    0.3996    0.1205    0.6686
Pt    0.3994    0.1219    0.7220
Pt    0.2488    0.2255    0.7230
Pt    0.3969    0.1715    0.6710
Pt    0.3995    0.1722    0.7224
Pt    0.3726    0.2471    0.6724
Pt    0.3975    0.2221    0.6722
Pt    0.3984    0.2231    0.7226
Pt    0.4477    0.0193    0.6720
Pt    0.4481    0.0205    0.7188
Pt    0.4957    0.9988    0.6949
Pt    0.4467    0.0712    0.6698
Pt    0.4466    0.0707    0.7213
Pt    0.3219    0.2216    0.6976
Pt    0.4469    0.1258    0.6703
Pt    0.4478    0.1240    0.7223
Pt    0.4476    0.1974    0.7476
Pt    0.4480    0.1737    0.6692
Pt    0.4461    0.1737    0.7224
Pt    0.2481    0.1734    0.7232
Pt    0.4453    0.2263    0.6730
Pt    0.4477    0.2240    0.7223
Pt    0.3211    0.0541    0.6232
Pt    0.2481    0.1206    0.7233
Pt    0.3222    0.2479    0.7245
Pt    0.3753    0.1227    0.6438
Pt    0.2717    0.0475    0.6716
Pt    0.2738    0.0464    0.7223
Pt    0.3754    0.0717    0.6994
Pt    0.2716    0.0988    0.6744
Pt    0.2747    0.0947    0.7193
Pt    0.3726    0.0757    0.6488
Pt    0.2718    0.1479    0.6716
Pt    0.2756    0.1455    0.7220
Pt    0.3719    0.0215    0.6980
Pt    0.2742    0.1971    0.6716
Pt    0.2728    0.1980    0.7218
Pt    0.2975    0.1492    0.7474
Pt    0.4963    0.1003    0.7458
Pt    0.4737    0.2471    0.7213
Pt    0.4249    0.2477    0.7245
Pt    0.3235    0.0458    0.6728
Pt    0.3239    0.0456    0.7197
Pt    0.3216    0.2223    0.6506
Pt    0.3254    0.0965    0.6739
Pt    0.3210    0.0989    0.7235
Pt    0.3710    0.1965    0.6239
Pt    0.3258    0.1486    0.6714
Pt    0.3242    0.1452    0.7231
Pt    0.3707    0.0208    0.6460
Pt    0.3216    0.1972    0.6744
Pt    0.3202    0.1968    0.7226
Pt    0.4231    0.0207    0.7450
Pt    0.4238    0.2216    0.7451
Pt    0.3725    0.2210    0.6975
Pt    0.3234    0.1696    0.6959
Pt    0.3735    0.0468    0.6713
Pt    0.3742    0.0467    0.7210
Pt    0.4782    0.0730    0.7433
Pt    0.3750    0.0971    0.6729
Pt    0.3737    0.0984    0.7233
Pt    0.3261    0.1713    0.6457
Pt    0.3712    0.1469    0.6704
Pt    0.3739    0.1443    0.7247
Pt    0.3460    0.0241    0.6239
Pt    0.3739    0.1974    0.6727
Pt    0.3715    0.1996    0.7231
Pt    0.3744    0.2240    0.6471
Pt    0.3740    0.1689    0.6986
Pt    0.4721    0.1986    0.6231
Pt    0.4222    0.0472    0.6705
Pt    0.4242    0.0487    0.7222
Pt    0.3471    0.0469    0.7453
Pt    0.4245    0.0976    0.6666
Pt    0.4213    0.0940    0.7193
Pt    0.3227    0.1243    0.6976
Pt    0.4222    0.1501    0.6720
Pt    0.4215    0.1475    0.7209
Pt    0.3259    0.1226    0.6487
Pt    0.4205    0.1983    0.6697
Pt    0.4210    0.1978    0.7217
Pt    0.2977    0.0970    0.7466
Pt    0.3224    0.0734    0.6959
Pt    0.3231    0.0718    0.6498
Pt    0.4708    0.0466    0.6728
Pt    0.4717    0.0476    0.7210
Pt    0.3233    0.0222    0.6955
Pt    0.4706    0.0970    0.6670
Pt    0.4726    0.0970    0.7221
Pt    0.3214    0.0216    0.6481
Pt    0.4736    0.1465    0.6714
Pt    0.4729    0.1455    0.7198
Pt    0.2499    0.1974    0.6986
Pt    0.4732    0.1993    0.6746
Pt    0.4742    0.1987    0.7229
Pt    0.2719    0.0229    0.6473
Pt    0.2715    0.0244    0.6931
Pt    0.2751    0.0764    0.6480
Pt    0.2733    0.0712    0.6958
Pt    0.2708    0.1232    0.6452
Pt    0.2750    0.1217    0.6980
Pt    0.2737    0.1745    0.6486
Pt    0.2727    0.1709    0.7001
Pt    0.2742    0.2234    0.6490
Pt    0.2733    0.2224    0.6983
Pt    0.3744    0.0219    0.7461
Pt    0.3705    0.1737    0.7450
Pt    0.3254    0.1986    0.6261
Pt    0.4953    0.1221    0.6715
Pt    0.4007    0.1480    0.7472
Pt    0.4726    0.2210    0.7470
Pt    0.4739    0.0221    0.7467
Pt    0.4735    0.1730    0.7469
Pt    0.4965    0.0675    0.6714
Pt    0.4480    0.0959    0.7459
Pt    0.4945    0.0969    0.6458
Pt    0.4964    0.0956    0.6902
Pt    0.2482    0.1222    0.6738
Pt    0.4255    0.2454    0.6248
Pt    0.4937    0.0239    0.6712
Pt    0.3726    0.2233    0.7465
Pt    0.2721    0.2238    0.7447
Pt    0.3209    0.0219    0.7402
Pt    0.4723    0.1235    0.7459
Pt    0.2749    0.0711    0.7452
Pt    0.3990    0.0463    0.7440
Pt    0.3479    0.0977    0.7469
Pt    0.3233    0.1721    0.7451
Pt    0.2751    0.1209    0.7425
Pt    0.2727    0.0987    0.6233
Pt    0.3764    0.1241    0.7470
Pt    0.2743    0.0195    0.7461
Pt    0.3483    0.1989    0.7451
Pt    0.3003    0.0470    0.7466
Pt    0.4976    0.0220    0.6237
Pt    0.4472    0.1485    0.7455
Pt    0.2487    0.1996    0.6480
Pt    0.3002    0.0238    0.6233
Pt    0.4955    0.0445    0.6972
Pt    0.4973    0.1468    0.6456
Pt    0.3986    0.2480    0.7464
Pt    0.3201    0.2223    0.7478
Pt    0.4217    0.1210    0.7478
Pt    0.3716    0.0728    0.7465
Pt    0.4493    0.2222    0.6229
Pt    0.4740    0.2246    0.8472
Pt    0.4765    0.2223    0.7936
Pt    0.4954    0.0265    0.8707
Pt    0.4243    0.1237    0.8448
Pt    0.2520    0.0988    0.7484
Pt    0.3742    0.1507    0.8217
Pt    0.4723    0.1750    0.8438
Pt    0.3753    0.1510    0.7712
Pt    0.2744    0.1724    0.7981
Pt    0.4751    0.1742    0.7967
Pt    0.4949    0.9998    0.8452
Pt    0.4941    0.1242    0.8220
Pt    0.4198    0.0228    0.7946
Pt    0.3740    0.1024    0.8229
Pt    0.2482    0.1447    0.8505
Pt    0.2497    0.0755    0.8241
Pt    0.4243    0.1701    0.7479
Pt    0.3228    0.0723    0.7506
Pt    0.3730    0.0979    0.7744
Pt    0.2973    0.0464    0.7958
Pt    0.3001    0.0486    0.8481
Pt    0.3220    0.2243    0.8476
Pt    0.3002    0.0991    0.7976
Pt    0.2988    0.0962    0.8492
Pt    0.3735    0.0231    0.8478
Pt    0.2972    0.1490    0.7998
Pt    0.2971    0.1485    0.8491
Pt    0.4712    0.1480    0.8208
Pt    0.2937    0.1997    0.7971
Pt    0.2989    0.1985    0.8485
Pt    0.4713    0.1422    0.7745
Pt    0.3742    0.9990    0.8220
Pt    0.4943    0.0219    0.8201
Pt    0.2510    0.0240    0.8218
Pt    0.3452    0.0447    0.7993
Pt    0.3461    0.0478    0.8477
Pt    0.2493    0.0013    0.7984
Pt    0.3476    0.1008    0.8003
Pt    0.3485    0.0957    0.8479
Pt    0.4742    0.0952    0.8221
Pt    0.3509    0.1506    0.7973
Pt    0.3491    0.1514    0.8483
Pt    0.4744    0.0979    0.7696
Pt    0.3456    0.2022    0.7984
Pt    0.3469    0.1972    0.8478
Pt    0.2484    0.9990    0.7502
Pt    0.3706    0.0728    0.7989
Pt    0.3200    0.0708    0.7989
Pt    0.4718    0.0469    0.8220
Pt    0.3956    0.0470    0.7989
Pt    0.3972    0.0461    0.8443
Pt    0.4760    0.0472    0.7729
Pt    0.3949    0.0982    0.7968
Pt    0.3966    0.0972    0.8447
Pt    0.3746    0.0704    0.8438
Pt    0.3966    0.1480    0.7999
Pt    0.3980    0.1500    0.8479
Pt    0.3725    0.0440    0.8214
Pt    0.3970    0.1984    0.7990
Pt    0.3931    0.2013    0.8455
Pt    0.3212    0.2210    0.7959
Pt    0.4238    0.1994    0.8196
Pt    0.3687    0.0478    0.7687
Pt    0.4222    0.1992    0.7703
Pt    0.4480    0.0484    0.7962
Pt    0.4470    0.0454    0.8463
Pt    0.3223    0.0215    0.7971
Pt    0.4477    0.0960    0.7979
Pt    0.4481    0.0964    0.8441
Pt    0.4202    0.0232    0.8477
Pt    0.4443    0.1457    0.7967
Pt    0.4487    0.1474    0.8463
Pt    0.2749    0.1206    0.8465
Pt    0.4494    0.1984    0.7927
Pt    0.4499    0.1996    0.8466
Pt    0.4726    0.1221    0.8472
Pt    0.4208    0.1497    0.8234
Pt    0.4701    0.1202    0.7969
Pt    0.4226    0.1477    0.7709
Pt    0.3475    0.1501    0.7482
Pt    0.3729    0.1253    0.7968
Pt    0.4239    0.0951    0.8233
Pt    0.2713    0.1748    0.8499
Pt    0.2720    0.1239    0.7944
Pt    0.2723    0.2232    0.8514
Pt    0.4211    0.1220    0.7977
Pt    0.2716    0.0749    0.8477
Pt    0.4738    0.0690    0.8491
Pt    0.4719    0.0724    0.7963
Pt    0.4235    0.0975    0.7747
Pt    0.2990    0.0215    0.7730
Pt    0.2988    0.0233    0.8242
Pt    0.2716    0.0732    0.7980
Pt    0.2978    0.0721    0.7735
Pt    0.2951    0.0715    0.8224
Pt    0.2707    0.0209    0.8471
Pt    0.2984    0.1232    0.7736
Pt    0.2992    0.1261    0.8233
Pt    0.2965    0.2478    0.8010
Pt    0.2952    0.1714    0.7733
Pt    0.2970    0.1735    0.8235
Pt    0.3238    0.0202    0.8439
Pt    0.2944    0.2230    0.7718
Pt    0.2953    0.2233    0.8261
Pt    0.2767    0.0203    0.7975
Pt    0.3455    0.0219    0.7663
Pt    0.3487    0.0194    0.8225
Pt    0.3694    0.0219    0.7952
Pt    0.3468    0.0733    0.7752
Pt    0.3490    0.0704    0.8226
Pt    0.4234    0.0470    0.8217
Pt    0.3502    0.1235    0.7736
Pt    0.3450    0.1248    0.8263
Pt    0.4220    0.0459    0.7702
Pt    0.3465    0.1739    0.7712
Pt    0.3453    0.1735    0.8215
Pt    0.3208    0.1783    0.7947
Pt    0.3456    0.2248    0.7709
Pt    0.3447    0.2273    0.8204
Pt    0.4194    0.0725    0.8484
Pt    0.3938    0.0234    0.7717
Pt    0.3987    0.0210    0.8208
Pt    0.3742    0.1272    0.8469
Pt    0.3967    0.0726    0.7725
Pt    0.3989    0.0722    0.8213
Pt    0.2722    0.2235    0.7984
Pt    0.4002    0.1220    0.7715
Pt    0.3980    0.1225    0.8234
Pt    0.3190    0.1231    0.8517
Pt    0.3988    0.1758    0.7717
Pt    0.3987    0.1771    0.8233
Pt    0.4753    0.1999    0.8193
Pt    0.3978    0.2230    0.7759
Pt    0.3997    0.2263    0.8239
Pt    0.3685    0.2250    0.8472
Pt    0.4495    0.0238    0.7752
Pt    0.4483    0.0202    0.8197
Pt    0.3698    0.2228    0.7987
Pt    0.4524    0.0737    0.7714
Pt    0.4475    0.0718    0.8219
Pt    0.3211    0.1744    0.8472
Pt    0.4470    0.1221    0.7694
Pt    0.4489    0.1206    0.8212
Pt    0.3736    0.1736    0.8479
Pt    0.4479    0.1699    0.7736
Pt    0.4494    0.1735    0.8184
Pt    0.4703    0.0220    0.8483
Pt    0.4495    0.2271    0.7709
Pt    0.4515    0.2229    0.8175
Pt    0.4746    0.0183    0.7967
Pt    0.4735    0.9989    0.8708
Pt    0.3688    0.1967    0.8207
Pt    0.3725    0.1990    0.7729
Pt    0.2740    0.0482    0.7737
Pt    0.2717    0.0497    0.8228
Pt    0.4736    0.1962    0.7692
Pt    0.2760    0.0973    0.7731
Pt    0.2726    0.0988    0.8215
Pt    0.4221    0.2233    0.8463
Pt    0.2720    0.1464    0.7710
Pt    0.2698    0.1479    0.8244
Pt    0.4246    0.2235    0.7960
Pt    0.2699    0.1959    0.7741
Pt    0.2736    0.1979    0.8240
Pt    0.2499    0.1234    0.8225
Pt    0.4226    0.0708    0.7962
Pt    0.3251    0.1228    0.7997
Pt    0.3733    0.1744    0.7945
Pt    0.3230    0.0486    0.7757
Pt    0.3211    0.0490    0.8228
Pt    0.3216    0.0712    0.8509
Pt    0.3209    0.0978    0.7738
Pt    0.3246    0.0982    0.8254
Pt    0.4207    0.1771    0.8469
Pt    0.3236    0.1483    0.7760
Pt    0.3232    0.1487    0.8215
Pt    0.4216    0.1710    0.7984
Pt    0.3240    0.1992    0.7698
Pt    0.3204    0.2008    0.8238
Pt    0.3981    0.1985    0.7498
Pt    0.2513    0.0252    0.7739
Pt    0.4972    0.1483    0.7962
Pt    0.2483    0.0748    0.7726
Pt    0.2484    0.2224    0.7722
Pt    0.4248    0.0728    0.7490
Pt    0.4531    0.2476    0.7962
Pt    0.3233    0.9990    0.7688
Pt    0.3732    0.0981    0.8696
Pt    0.3991    0.2473    0.7976
Pt    0.4257    0.0998    0.8717
Pt    0.4517    0.0473    0.7484
Pt    0.4958    0.1474    0.7495
Pt    0.4946    0.1497    0.8471
Pt    0.3187    0.2474    0.8706
Pt    0.3986    0.2240    0.8725
Pt    0.4974    0.1973    0.8438
Pt    0.3205    0.1242    0.7506
Pt    0.4967    0.0966    0.8449
Pt    0.4973    0.0708    0.8223
Pt    0.4726    0.2480    0.8727
Pt    0.4489    0.1751    0.8701
Pt    0.4971    0.1235    0.8725
Pt    0.4229    0.9998    0.8212
Pt    0.3465    0.2482    0.8455
Pt    0.2489    0.0481    0.7492
Pt    0.2491    0.1952    0.7983
Pt    0.3966    0.0215    0.8728
Pt    0.3204    0.1501    0.8719
Pt    0.2951    0.0217    0.8694
Pt    0.4252    0.1486    0.8713
Pt    0.2969    0.2479    0.8473
Pt    0.2971    0.2233    0.8724
Pt    0.3955    0.0737    0.8699
Pt    0.3982    0.0969    0.7491
Pt    0.3732    0.1988    0.8704
Pt    0.4964    0.1723    0.8697
Pt    0.4963    0.1720    0.7729
Pt    0.4476    0.2245    0.8699
Pt    0.4724    0.0973    0.8691
Pt    0.4008    0.1242    0.8693
Pt    0.3485    0.0705    0.8717
Pt    0.4965    0.1222    0.7705
Pt    0.3742    0.0469    0.8713
Pt    0.3492    0.1232    0.8673
Pt    0.3482    0.0235    0.8719
Pt    0.3470    0.2258    0.8728
Pt    0.4702    0.1504    0.8709
Pt    0.3487    0.1747    0.8729
Pt    0.3228    0.1980    0.8723
Pt    0.4235    0.2008    0.8726
Pt    0.2724    0.0492    0.8721
Pt    0.2982    0.1985    0.7480
Pt    0.4736    0.2234    0.9473
Pt    0.4726    0.2205    0.8979
Pt    0.2946    0.1227    0.8744
Pt    0.4745    0.1678    0.9490
Pt    0.2957    0.0722    0.8759
Pt    0.4468    0.0223    0.8734
Pt    0.2493    0.0737    0.9717
Pt    0.4970    0.0212    0.9206
Pt    0.2942    0.1724    0.8730
Pt    0.2481    0.0003    0.8997
Pt    0.4716    0.1980    0.8729
Pt    0.2679    0.9983    0.9722
Pt    0.2983    0.0463    0.8965
Pt    0.2979    0.0477    0.9469
Pt    0.2981    0.0999    0.8991
Pt    0.3013    0.0998    0.9442
Pt    0.2956    0.1479    0.8994
Pt    0.2977    0.1417    0.9475
Pt    0.2978    0.1980    0.8972
Pt    0.2956    0.1984    0.9474
Pt    0.2721    0.9993    0.9227
Pt    0.3740    0.1515    0.8745
Pt    0.3506    0.0473    0.9005
Pt    0.3473    0.0444    0.9433
Pt    0.3498    0.1011    0.8940
Pt    0.3476    0.0990    0.9450
Pt    0.3471    0.1475    0.8974
Pt    0.3493    0.1511    0.9449
Pt    0.3460    0.1999    0.8978
Pt    0.3456    0.1991    0.9492
Pt    0.4203    0.2468    0.9745
Pt    0.4230    0.0476    0.8732
Pt    0.3982    0.0504    0.8988
Pt    0.3965    0.0441    0.9474
Pt    0.3971    0.0986    0.8955
Pt    0.3968    0.0991    0.9491
Pt    0.4016    0.1491    0.8974
Pt    0.3987    0.1530    0.9472
Pt    0.3986    0.1989    0.8965
Pt    0.3976    0.2005    0.9456
Pt    0.4960    0.0484    0.8981
Pt    0.3265    0.0453    0.8735
Pt    0.4448    0.0473    0.8992
Pt    0.4466    0.0443    0.9473
Pt    0.4487    0.0984    0.8982
Pt    0.4508    0.0980    0.9480
Pt    0.4486    0.1486    0.8972
Pt    0.4460    0.1454    0.9452
Pt    0.4473    0.1979    0.8998
Pt    0.4513    0.1973    0.9473
Pt    0.4739    0.1734    0.8972
Pt    0.4755    0.1201    0.9490
Pt    0.3228    0.2480    0.9727
Pt    0.4752    0.1217    0.8952
Pt    0.4729    0.2472    0.9727
Pt    0.4720    0.0709    0.9472
Pt    0.2495    0.0953    0.9461
Pt    0.2961    0.9989    0.8965
Pt    0.2705    0.1219    0.9961
Pt    0.2505    0.0253    0.8758
Pt    0.2975    0.0228    0.9217
Pt    0.2983    0.0205    0.9715
Pt    0.2987    0.0732    0.9227
Pt    0.3026    0.0751    0.9698
Pt    0.3003    0.1225    0.9216
Pt    0.2953    0.1224    0.9757
Pt    0.2950    0.1752    0.9231
Pt    0.2940    0.1729    0.9701
Pt    0.2947    0.2214    0.9213
Pt    0.2971    0.2219    0.9734
Pt    0.3477    0.0181    0.9216
Pt    0.3504    0.0218    0.9739
Pt    0.3464    0.0718    0.9228
Pt    0.3502    0.0742    0.9701
Pt    0.3481    0.1242    0.9202
Pt    0.3504    0.1251    0.9673
Pt    0.3490    0.1756    0.9212
Pt    0.3488    0.1725    0.9725
Pt    0.3457    0.2209    0.9225
Pt    0.3446    0.2226    0.9735
Pt    0.3964    0.0219    0.9215
Pt    0.3964    0.0236    0.9725
Pt    0.3997    0.0744    0.9222
Pt    0.3980    0.0728    0.9719
Pt    0.3983    0.1236    0.9226
Pt    0.3988    0.1199    0.9748
Pt    0.3973    0.1756    0.9240
Pt    0.3982    0.1733    0.9737
Pt    0.3967    0.2228    0.9218
Pt    0.3965    0.2222    0.9717
Pt    0.4463    0.0201    0.9225
Pt    0.4494    0.0211    0.9726
Pt    0.4469    0.0701    0.9209
Pt    0.4487    0.0707    0.9722
Pt    0.4481    0.1217    0.9223
Pt    0.4488    0.1224    0.9744
Pt    0.4526    0.1711    0.9228
Pt    0.4468    0.1717    0.9717
Pt    0.4508    0.2207    0.9238
Pt    0.4468    0.2246    0.9690
Pt    0.4771    0.0734    0.8945
Pt    0.4735    0.2466    0.9203
Pt    0.2728    0.0492    0.9228
Pt    0.2713    0.0466    0.9713
Pt    0.2749    0.1001    0.9210
Pt    0.2742    0.0959    0.9743
Pt    0.2714    0.1474    0.9248
Pt    0.2698    0.1496    0.9749
Pt    0.2691    0.2001    0.9231
Pt    0.2690    0.1966    0.9745
Pt    0.2699    0.0980    0.8736
Pt    0.2734    0.2464    0.9244
Pt    0.3220    0.0434    0.9222
Pt    0.3244    0.0462    0.9714
Pt    0.3239    0.0983    0.9192
Pt    0.3264    0.1005    0.9745
Pt    0.3232    0.1496    0.9221
Pt    0.3229    0.1488    0.9721
Pt    0.3197    0.1964    0.9239
Pt    0.3227    0.1972    0.9734
Pt    0.2486    0.2216    0.9761
Pt    0.4966    0.1964    0.8929
Pt    0.3764    0.0499    0.9215
Pt    0.3701    0.0468    0.9737
Pt    0.3706    0.0981    0.9197
Pt    0.3721    0.0983    0.9750
Pt    0.3757    0.1502    0.9208
Pt    0.3752    0.1494    0.9718
Pt    0.3722    0.1999    0.9232
Pt    0.3720    0.1985    0.9749
Pt    0.4764    0.0243    0.9476
Pt    0.3967    0.1977    0.9962
Pt    0.4214    0.0454    0.9221
Pt    0.4231    0.0496    0.9721
Pt    0.4240    0.0988    0.9213
Pt    0.4239    0.0949    0.9744
Pt    0.4241    0.1490    0.9207
Pt    0.4245    0.1470    0.9725
Pt    0.4214    0.2001    0.9189
Pt    0.4236    0.1961    0.9726
Pt    0.4479    0.2476    0.8963
Pt    0.2699    0.1730    0.9965
Pt    0.4726    0.0465    0.9211
Pt    0.4731    0.0445    0.9735
Pt    0.4771    0.0966    0.9214
Pt    0.4749    0.0970    0.9720
Pt    0.4736    0.1427    0.9250
Pt    0.4723    0.1449    0.9746
Pt    0.4784    0.1973    0.9208
Pt    0.4703    0.1938    0.9716
Pt    0.2737    0.0230    0.8988
Pt    0.2739    0.0213    0.9477
Pt    0.2718    0.0750    0.8993
Pt    0.2769    0.0763    0.9480
Pt    0.2671    0.1244    0.8981
Pt    0.2716    0.1205    0.9510
Pt    0.2704    0.1719    0.8988
Pt    0.2684    0.1727    0.9491
Pt    0.2718    0.2222    0.8967
Pt    0.2737    0.2234    0.9494
Pt    0.3233    0.0201    0.8988
Pt    0.3215    0.0214    0.9478
Pt    0.3255    0.0731    0.8975
Pt    0.3242    0.0733    0.9454
Pt    0.3213    0.1231    0.8959
Pt    0.3261    0.1232    0.9466
Pt    0.3240    0.1736    0.8977
Pt    0.3230    0.1731    0.9497
Pt    0.3214    0.2239    0.8954
Pt    0.3200    0.2216    0.9484
Pt    0.3727    0.0218    0.8964
Pt    0.3729    0.0198    0.9471
Pt    0.3712    0.0733    0.8969
Pt    0.3732    0.0767    0.9464
Pt    0.3731    0.1255    0.8937
Pt    0.3732    0.1254    0.9433
Pt    0.3730    0.1728    0.8977
Pt    0.3733    0.1740    0.9493
Pt    0.3708    0.2252    0.8962
Pt    0.3697    0.2243    0.9482
Pt    0.4202    0.0222    0.8963
Pt    0.4251    0.0214    0.9473
Pt    0.4236    0.0759    0.8961
Pt    0.4215    0.0771    0.9470
Pt    0.4229    0.1243    0.8961
Pt    0.4238    0.1209    0.9491
Pt    0.4237    0.1724    0.8961
Pt    0.4243    0.1742    0.9456
Pt    0.4222    0.2264    0.8985
Pt    0.4200    0.2277    0.9474
Pt    0.4711    0.0233    0.8968
Pt    0.4964    0.1956    0.9473
Pt    0.2986    0.1510    0.9961
Pt    0.2744    0.2006    0.8738
Pt    0.3240    0.0233    0.9968
Pt    0.3510    0.1437    0.9958
Pt    0.3200    0.2455    0.9239
Pt    0.2984    0.0973    0.9958
Pt    0.2708    0.1481    0.8742
Pt    0.4966    0.1492    0.8953
Pt    0.3704    0.1718    0.9958
Pt    0.3464    0.1982    0.9965
Pt    0.3237    0.1698    0.9953
Pt    0.4255    0.0713    0.9969
Pt    0.4248    0.2213    0.9962
Pt    0.3231    0.0768    0.9950
Pt    0.3475    0.0541    0.9955
Pt    0.3976    0.1739    0.8759
Pt    0.3963    0.0487    0.9965
Pt    0.4778    0.1210    0.9969
Pt    0.2728    0.2243    0.9963
Pt    0.4740    0.0735    0.9967
Pt    0.2962    0.1962    0.9957
Pt    0.4721    0.2210    0.9968
Pt    0.2997    0.0483    0.9961
Pt    0.4254    0.0247    0.9967
Pt    0.3986    0.1467    0.9964
Pt    0.4484    0.0989    0.9974
Pt    0.2968    0.9991    0.9972
Pt    0.3223    0.9990    0.8729
Pt    0.3241    0.0982    0.8734
Pt    0.4499    0.1240    0.8730
Pt    0.4469    0.0747    0.8729
Pt    0.4703    0.0479    0.8738
Pt    0.2503    0.2962    0.0009
Pt    0.4728    0.3732    0.0970
Pt    0.4710    0.3233    0.1000
Pt    0.2495    0.4684    0.0225
Pt    0.2487    0.4708    0.0697
Pt    0.3709    0.2506    0.0780
Pt    0.4715    0.3242    0.0472
Pt    0.3224    0.2514    0.0781
Pt    0.4724    0.2737    0.0971
Pt    0.4723    0.2745    0.0479
Pt    0.3476    0.2988    0.9980
Pt    0.4926    0.3994    0.0938
Pt    0.3245    0.2724    0.0002
Pt    0.3476    0.2484    0.9990
Pt    0.4729    0.2773    0.9991
Pt    0.4214    0.2501    0.0760
Pt    0.4694    0.4244    0.0984
Pt    0.2988    0.3016    0.0521
Pt    0.2482    0.4213    0.0723
Pt    0.3013    0.3465    0.0536
Pt    0.3228    0.3226    0.9996
Pt    0.3038    0.3983    0.0475
Pt    0.2983    0.3952    0.1031
Pt    0.4955    0.3702    0.0727
Pt    0.2995    0.4448    0.0491
Pt    0.2992    0.4440    0.1006
Pt    0.4423    0.3987    0.1005
Pt    0.3751    0.3751    0.9984
Pt    0.2492    0.4937    0.0469
Pt    0.4700    0.2491    0.0733
Pt    0.3494    0.2984    0.0515
Pt    0.3471    0.2978    0.1030
Pt    0.2992    0.4740    0.1217
Pt    0.3519    0.3495    0.0452
Pt    0.4241    0.4781    0.0975
Pt    0.2491    0.4945    0.9983
Pt    0.2985    0.2512    0.0988
Pt    0.4967    0.2494    0.0963
Pt    0.2504    0.2730    0.0769
Pt    0.4010    0.2997    0.0543
Pt    0.4000    0.3003    0.1005
Pt    0.2738    0.4721    0.9982
Pt    0.4974    0.2767    0.0225
Pt    0.4502    0.4512    0.0988
Pt    0.2728    0.2487    0.0737
Pt    0.2481    0.3729    0.0237
Pt    0.4432    0.2981    0.0520
Pt    0.4494    0.2989    0.0988
Pt    0.4487    0.3482    0.0962
Pt    0.4195    0.3272    0.1003
Pt    0.4177    0.3264    0.0509
Pt    0.2489    0.3452    0.0991
Pt    0.4967    0.3487    0.0488
Pt    0.3957    0.2505    0.1013
Pt    0.2499    0.3496    0.0009
Pt    0.4246    0.4293    0.1037
Pt    0.4204    0.2729    0.0985
Pt    0.3239    0.4978    0.0254
Pt    0.3277    0.4953    0.0724
Pt    0.3018    0.2749    0.0283
Pt    0.3013    0.2783    0.0786
Pt    0.2993    0.3239    0.0243
Pt    0.2959    0.3237    0.0775
Pt    0.3002    0.3756    0.0226
Pt    0.3002    0.3776    0.0754
Pt    0.3010    0.4203    0.0232
Pt    0.2940    0.4200    0.0771
Pt    0.2983    0.4715    0.0242
Pt    0.2993    0.4686    0.0767
Pt    0.3486    0.2726    0.0263
Pt    0.3467    0.2736    0.0779
Pt    0.3458    0.3237    0.0232
Pt    0.3488    0.3276    0.0718
Pt    0.3517    0.3745    0.0227
Pt    0.3973    0.2722    0.0226
Pt    0.3949    0.2733    0.0718
Pt    0.4025    0.3251    0.0206
Pt    0.3937    0.3265    0.0750
Pt    0.4462    0.2722    0.0232
Pt    0.4455    0.2728    0.0739
Pt    0.4433    0.3254    0.0279
Pt    0.4440    0.3277    0.0728
Pt    0.3004    0.4945    0.9985
Pt    0.4937    0.2720    0.1209
Pt    0.2763    0.2973    0.0250
Pt    0.2744    0.2967    0.0740
Pt    0.2759    0.3495    0.0251
Pt    0.2749    0.3487    0.0776
Pt    0.2741    0.3953    0.0234
Pt    0.2715    0.3964    0.0774
Pt    0.2761    0.4458    0.0248
Pt    0.2730    0.4463    0.0774
Pt    0.4951    0.3217    0.0181
Pt    0.3000    0.2944    0.0010
Pt    0.3251    0.2983    0.0262
Pt    0.3254    0.3038    0.0760
Pt    0.3229    0.3481    0.0239
Pt    0.3290    0.3994    0.0236
Pt    0.3224    0.4475    0.0252
Pt    0.4941    0.4256    0.1205
Pt    0.4212    0.2721    0.0472
Pt    0.3737    0.2988    0.0245
Pt    0.3709    0.2982    0.0742
Pt    0.3775    0.3494    0.0242
Pt    0.4950    0.3458    0.0980
Pt    0.3000    0.4950    0.0505
Pt    0.4217    0.2943    0.0227
Pt    0.4226    0.3009    0.0793
Pt    0.3279    0.4732    0.0036
Pt    0.3497    0.4269    0.0201
Pt    0.4709    0.3001    0.0243
Pt    0.4748    0.3006    0.0713
Pt    0.4716    0.3486    0.0717
Pt    0.4724    0.3491    0.1203
Pt    0.2746    0.2709    0.0483
Pt    0.4013    0.4980    0.0979
Pt    0.2734    0.3267    0.0516
Pt    0.2743    0.4974    0.0222
Pt    0.2783    0.3727    0.0513
Pt    0.2730    0.3721    0.1011
Pt    0.2752    0.3714    0.9990
Pt    0.2728    0.4197    0.0491
Pt    0.2697    0.4223    0.0984
Pt    0.3745    0.3217    0.1003
Pt    0.2741    0.4719    0.0459
Pt    0.2753    0.4683    0.1009
Pt    0.3023    0.2505    0.0483
Pt    0.3258    0.2739    0.0523
Pt    0.3213    0.2751    0.1033
Pt    0.3752    0.3232    0.0448
Pt    0.3228    0.3233    0.0465
Pt    0.3729    0.2749    0.1045
Pt    0.3253    0.3694    0.0491
Pt    0.4689    0.3957    0.1224
Pt    0.3728    0.2713    0.0476
Pt    0.3248    0.4700    0.0487
Pt    0.3271    0.4712    0.0990
Pt    0.3941    0.4697    0.1215
Pt    0.3232    0.3712    0.9990
Pt    0.3238    0.4221    0.0005
Pt    0.4527    0.4784    0.1185
Pt    0.4967    0.3750    0.1205
Pt    0.3527    0.4945    0.0957
Pt    0.2533    0.3259    0.0217
Pt    0.2527    0.2985    0.0509
Pt    0.2489    0.2690    0.0236
Pt    0.4246    0.2701    0.9983
Pt    0.2738    0.4950    0.0741
Pt    0.4929    0.2515    0.9993
Pt    0.3506    0.3495    0.0012
Pt    0.3043    0.4962    0.0962
Pt    0.4727    0.2499    0.0224
Pt    0.4967    0.3231    0.0729
Pt    0.4464    0.2996    0.9999
Pt    0.2499    0.4453    0.0519
Pt    0.4972    0.2991    0.0974
Pt    0.4260    0.4563    0.1219
Pt    0.4956    0.2717    0.0699
Pt    0.3734    0.3255    0.0029
Pt    0.4457    0.3729    0.1197
Pt    0.2479    0.4210    0.0249
Pt    0.3536    0.4733    0.1219
Pt    0.3972    0.4340    0.1225
Pt    0.2991    0.2507    0.9984
Pt    0.3739    0.2738    0.9986
Pt    0.4759    0.4743    0.1948
Pt    0.2514    0.4695    0.1743
Pt    0.4714    0.4228    0.1973
Pt    0.2973    0.4445    0.1491
Pt    0.2963    0.4440    0.2008
Pt    0.4760    0.2496    0.1738
Pt    0.3470    0.3974    0.1983
Pt    0.3439    0.4493    0.1500
Pt    0.3452    0.4474    0.1994
Pt    0.3971    0.2533    0.2040
Pt    0.2745    0.4460    0.1252
Pt    0.3948    0.3013    0.1531
Pt    0.3918    0.3165    0.1906
Pt    0.3968    0.3524    0.1970
Pt    0.3927    0.4000    0.2033
Pt    0.3981    0.4486    0.2023
Pt    0.4535    0.4951    0.1497
Pt    0.3492    0.2500    0.1506
Pt    0.4448    0.3010    0.1506
Pt    0.4441    0.2979    0.1963
Pt    0.4441    0.3501    0.1484
Pt    0.4460    0.3512    0.2020
Pt    0.4433    0.3949    0.1472
Pt    0.4486    0.3975    0.1971
Pt    0.4483    0.4494    0.1968
Pt    0.3721    0.2521    0.1278
Pt    0.4741    0.4244    0.1495
Pt    0.4741    0.3754    0.1951
Pt    0.4506    0.4215    0.1273
Pt    0.4717    0.3725    0.1464
Pt    0.4240    0.2511    0.2244
Pt    0.4711    0.3254    0.1960
Pt    0.4740    0.3275    0.1486
Pt    0.4461    0.2495    0.1471
Pt    0.2994    0.4184    0.1749
Pt    0.2966    0.4164    0.2244
Pt    0.3464    0.2731    0.1252
Pt    0.2948    0.4707    0.1771
Pt    0.2976    0.4724    0.2243
Pt    0.2496    0.4454    0.1490
Pt    0.3435    0.3739    0.2263
Pt    0.3436    0.4231    0.1749
Pt    0.3441    0.4230    0.2235
Pt    0.4950    0.3493    0.1996
Pt    0.3470    0.4737    0.1724
Pt    0.3492    0.4737    0.2222
Pt    0.3996    0.4970    0.2015
Pt    0.3954    0.2775    0.1778
Pt    0.3964    0.2621    0.2413
Pt    0.4205    0.2521    0.1764
Pt    0.3937    0.2902    0.2116
Pt    0.3932    0.3277    0.2205
Pt    0.3943    0.3727    0.1711
Pt    0.3988    0.3744    0.2237
Pt    0.3942    0.4279    0.1747
Pt    0.3979    0.4233    0.2245
Pt    0.4001    0.4763    0.1769
Pt    0.4031    0.4743    0.2249
Pt    0.4192    0.4031    0.1261
Pt    0.4468    0.2742    0.1712
Pt    0.4459    0.2769    0.2225
Pt    0.4965    0.3259    0.2261
Pt    0.4487    0.3259    0.1751
Pt    0.4417    0.3249    0.2259
Pt    0.4729    0.2489    0.2248
Pt    0.4454    0.3729    0.1706
Pt    0.4464    0.3762    0.2235
Pt    0.4468    0.4248    0.1726
Pt    0.4494    0.4228    0.2254
Pt    0.4505    0.4730    0.1725
Pt    0.4499    0.4712    0.2203
Pt    0.2484    0.3934    0.1499
Pt    0.2480    0.4717    0.1232
Pt    0.3708    0.3036    0.1282
Pt    0.2726    0.4438    0.1761
Pt    0.2733    0.4476    0.2252
Pt    0.4948    0.3026    0.2005
Pt    0.3208    0.3950    0.2220
Pt    0.4190    0.3007    0.1300
Pt    0.3207    0.4462    0.1772
Pt    0.3206    0.4476    0.2236
Pt    0.3255    0.4965    0.1746
Pt    0.3272    0.4927    0.1232
Pt    0.4690    0.2495    0.1263
Pt    0.3692    0.3494    0.2253
Pt    0.3683    0.4014    0.1713
Pt    0.3680    0.3989    0.2227
Pt    0.3690    0.4480    0.1713
Pt    0.3726    0.4498    0.2264
Pt    0.2500    0.4211    0.1282
Pt    0.3950    0.3244    0.1274
Pt    0.4477    0.4493    0.1481
Pt    0.4244    0.4745    0.1475
Pt    0.4179    0.3014    0.1756
Pt    0.4202    0.3003    0.2269
Pt    0.4954    0.2506    0.1477
Pt    0.4250    0.3502    0.1759
Pt    0.4192    0.3506    0.2240
Pt    0.4171    0.4043    0.1679
Pt    0.4215    0.3974    0.2213
Pt    0.4209    0.4490    0.1770
Pt    0.4263    0.4471    0.2203
Pt    0.2511    0.4198    0.2235
Pt    0.4242    0.4981    0.1727
Pt    0.4227    0.4300    0.1463
Pt    0.2516    0.4973    0.1976
Pt    0.4718    0.2999    0.1764
Pt    0.4711    0.3007    0.2217
Pt    0.3990    0.2756    0.1268
Pt    0.4701    0.3489    0.1722
Pt    0.4695    0.3491    0.2254
Pt    0.4695    0.2747    0.2469
Pt    0.4699    0.3972    0.1697
Pt    0.4744    0.3984    0.2222
Pt    0.4776    0.4468    0.1724
Pt    0.4758    0.4472    0.2209
Pt    0.2727    0.4195    0.1552
Pt    0.2736    0.4189    0.1998
Pt    0.2766    0.4724    0.1466
Pt    0.2730    0.4711    0.2006
Pt    0.3195    0.4231    0.1507
Pt    0.3213    0.4185    0.1986
Pt    0.3166    0.4703    0.1522
Pt    0.3195    0.4710    0.1987
Pt    0.3739    0.2742    0.1499
Pt    0.3716    0.3738    0.1998
Pt    0.3707    0.4276    0.1995
Pt    0.3738    0.4732    0.1505
Pt    0.3733    0.4730    0.1955
Pt    0.4191    0.2754    0.1528
Pt    0.4188    0.2775    0.1996
Pt    0.4186    0.3266    0.1508
Pt    0.4221    0.3249    0.1993
Pt    0.4160    0.3761    0.1476
Pt    0.4183    0.3789    0.1921
Pt    0.4233    0.4227    0.1981
Pt    0.4245    0.4740    0.2009
Pt    0.4726    0.2746    0.1489
Pt    0.4726    0.2741    0.1988
Pt    0.4744    0.4971    0.2251
Pt    0.3968    0.4500    0.1503
Pt    0.4696    0.2978    0.1236
Pt    0.3682    0.4266    0.1491
Pt    0.3736    0.4977    0.1732
Pt    0.4959    0.4192    0.1737
Pt    0.4716    0.4482    0.1243
Pt    0.3222    0.4484    0.1247
Pt    0.4750    0.4727    0.1489
Pt    0.2714    0.3955    0.1245
Pt    0.4204    0.3467    0.1269
Pt    0.4449    0.3229    0.1265
Pt    0.4941    0.3986    0.1425
Pt    0.2972    0.4196    0.1274
Pt    0.4167    0.3236    0.2466
Pt    0.3990    0.4967    0.1456
Pt    0.4948    0.3011    0.1487
Pt    0.2971    0.4963    0.1987
Pt    0.2497    0.4740    0.2242
Pt    0.3724    0.2497    0.1754
Pt    0.3908    0.2984    0.2450
Pt    0.4748    0.3760    0.2452
Pt    0.2740    0.4959    0.1717
Pt    0.3744    0.4967    0.2243
Pt    0.4432    0.2762    0.1251
Pt    0.4965    0.3748    0.1704
Pt    0.3498    0.4962    0.1464
Pt    0.4948    0.3520    0.1460
Pt    0.3210    0.4202    0.2470
Pt    0.2962    0.4971    0.1487
Pt    0.3690    0.3209    0.2438
Pt    0.3936    0.3500    0.2474
Pt    0.3445    0.3471    0.2463
Pt    0.3714    0.3736    0.2453
Pt    0.4285    0.4739    0.2456
Pt    0.2987    0.4470    0.2477
Pt    0.4507    0.4468    0.2468
Pt    0.3475    0.4488    0.2473
Pt    0.4961    0.3511    0.2471
Pt    0.4723    0.3250    0.2467
Pt    0.4724    0.4230    0.2475
Pt    0.2980    0.3931    0.2476
Pt    0.3750    0.4958    0.1230
Pt    0.2730    0.4972    0.1232
Pt    0.4754    0.4716    0.3472
Pt    0.3209    0.3694    0.2519
Pt    0.4688    0.2492    0.2731
Pt    0.2721    0.4230    0.2493
Pt    0.4733    0.4760    0.2974
Pt    0.4003    0.4524    0.2497
Pt    0.4741    0.4238    0.3461
Pt    0.2976    0.3022    0.3497
Pt    0.2987    0.3474    0.2944
Pt    0.2952    0.3474    0.3490
Pt    0.4465    0.3966    0.2505
Pt    0.2920    0.3956    0.2964
Pt    0.2975    0.4003    0.3467
Pt    0.3743    0.4755    0.2510
Pt    0.2961    0.4463    0.2977
Pt    0.2980    0.4484    0.3510
Pt    0.3488    0.2973    0.3437
Pt    0.4958    0.2489    0.2958
Pt    0.3448    0.3474    0.2939
Pt    0.3466    0.3478    0.3494
Pt    0.2957    0.4959    0.2995
Pt    0.3461    0.3976    0.2956
Pt    0.3453    0.3964    0.3489
Pt    0.2728    0.3006    0.3705
Pt    0.3475    0.4488    0.2989
Pt    0.3444    0.4493    0.3481
Pt    0.4951    0.2721    0.2740
Pt    0.4186    0.2496    0.3225
Pt    0.3940    0.2952    0.2965
Pt    0.3969    0.2982    0.3458
Pt    0.2488    0.3732    0.3257
Pt    0.3945    0.3472    0.2961
Pt    0.3986    0.3536    0.3473
Pt    0.3736    0.4227    0.2483
Pt    0.3955    0.3972    0.2971
Pt    0.3944    0.4036    0.3463
Pt    0.4733    0.4968    0.3719
Pt    0.4002    0.4472    0.2954
Pt    0.3932    0.4473    0.3492
Pt    0.4142    0.2500    0.2739
Pt    0.4205    0.4955    0.3722
Pt    0.4242    0.2972    0.3701
Pt    0.4969    0.4494    0.3004
Pt    0.4446    0.2966    0.2954
Pt    0.4458    0.2961    0.3460
Pt    0.2496    0.3242    0.3710
Pt    0.4500    0.3512    0.3009
Pt    0.4452    0.3478    0.3466
Pt    0.4971    0.2968    0.3473
Pt    0.4473    0.3969    0.2996
Pt    0.4476    0.4000    0.3457
Pt    0.2726    0.3298    0.3031
Pt    0.4452    0.4481    0.2972
Pt    0.4466    0.4469    0.3480
Pt    0.4695    0.4216    0.2991
Pt    0.4234    0.4982    0.3240
Pt    0.4720    0.2687    0.3466
Pt    0.3985    0.4957    0.3457
Pt    0.4708    0.3714    0.3491
Pt    0.4724    0.3742    0.2978
Pt    0.2979    0.3242    0.3223
Pt    0.2915    0.3711    0.2704
Pt    0.2944    0.3729    0.3243
Pt    0.2955    0.4244    0.2733
Pt    0.2968    0.4206    0.3189
Pt    0.2970    0.4754    0.2748
Pt    0.2967    0.4752    0.3285
Pt    0.3498    0.3178    0.2723
Pt    0.3465    0.3261    0.3236
Pt    0.3488    0.3740    0.2700
Pt    0.3460    0.3686    0.3215
Pt    0.3465    0.4261    0.2711
Pt    0.3437    0.4237    0.3221
Pt    0.3467    0.4793    0.2746
Pt    0.3487    0.4757    0.3229
Pt    0.3962    0.2769    0.2709
Pt    0.3954    0.2728    0.3226
Pt    0.3911    0.3187    0.2715
Pt    0.3964    0.3229    0.3217
Pt    0.3950    0.3740    0.2720
Pt    0.3939    0.3727    0.3234
Pt    0.3992    0.4245    0.2715
Pt    0.3946    0.4247    0.3183
Pt    0.4019    0.4745    0.2755
Pt    0.3990    0.4729    0.3220
Pt    0.4474    0.2756    0.2726
Pt    0.4474    0.2720    0.3203
Pt    0.4455    0.3246    0.2746
Pt    0.4451    0.3210    0.3237
Pt    0.4455    0.3703    0.2740
Pt    0.4477    0.3747    0.3228
Pt    0.4511    0.4212    0.2749
Pt    0.4465    0.4266    0.3246
Pt    0.4490    0.4745    0.2717
Pt    0.4490    0.4757    0.3236
Pt    0.4252    0.4742    0.3469
Pt    0.2720    0.3498    0.3276
Pt    0.2687    0.3967    0.2687
Pt    0.2713    0.3998    0.3259
Pt    0.2707    0.4506    0.2736
Pt    0.2725    0.4493    0.3224
Pt    0.3205    0.3416    0.2715
Pt    0.3207    0.3504    0.3243
Pt    0.3192    0.3993    0.2752
Pt    0.3210    0.3976    0.3227
Pt    0.3241    0.4531    0.2750
Pt    0.3204    0.4461    0.3215
Pt    0.3735    0.2958    0.3206
Pt    0.3689    0.3478    0.2713
Pt    0.3736    0.3467    0.3227
Pt    0.3701    0.3987    0.2713
Pt    0.3677    0.3982    0.3235
Pt    0.3744    0.4492    0.2733
Pt    0.3727    0.4500    0.3239
Pt    0.4235    0.4736    0.3004
Pt    0.4967    0.2739    0.3702
Pt    0.4199    0.2989    0.2719
Pt    0.4215    0.2965    0.3200
Pt    0.4184    0.3474    0.2700
Pt    0.4219    0.3471    0.3217
Pt    0.4217    0.3949    0.2734
Pt    0.4188    0.4001    0.3214
Pt    0.4244    0.4492    0.2714
Pt    0.4179    0.4470    0.3230
Pt    0.4969    0.3732    0.3216
Pt    0.3977    0.2732    0.3716
Pt    0.4740    0.3004    0.2709
Pt    0.4712    0.2965    0.3219
Pt    0.4700    0.3480    0.2705
Pt    0.4733    0.3485    0.3235
Pt    0.4720    0.3957    0.2737
Pt    0.4737    0.3994    0.3221
Pt    0.4715    0.4498    0.2739
Pt    0.4720    0.4477    0.3216
Pt    0.4955    0.2739    0.3227
Pt    0.2725    0.4752    0.2507
Pt    0.2696    0.3189    0.3424
Pt    0.2693    0.3716    0.3009
Pt    0.2702    0.3752    0.3515
Pt    0.4456    0.2494    0.3461
Pt    0.2709    0.4240    0.2985
Pt    0.2723    0.4260    0.3466
Pt    0.4252    0.2761    0.2496
Pt    0.2720    0.4740    0.2999
Pt    0.2733    0.4743    0.3501
Pt    0.3213    0.3255    0.3003
Pt    0.3226    0.3237    0.3475
Pt    0.4971    0.3492    0.2966
Pt    0.3218    0.3733    0.2930
Pt    0.3190    0.3731    0.3477
Pt    0.4687    0.3248    0.2975
Pt    0.3235    0.4242    0.2955
Pt    0.3216    0.4251    0.3504
Pt    0.4728    0.2731    0.2977
Pt    0.3245    0.4742    0.3004
Pt    0.3234    0.4733    0.3494
Pt    0.3749    0.2730    0.3448
Pt    0.2705    0.4980    0.3261
Pt    0.3707    0.3195    0.2974
Pt    0.3734    0.3243    0.3494
Pt    0.4727    0.3191    0.3443
Pt    0.3694    0.3713    0.2959
Pt    0.3716    0.3774    0.3501
Pt    0.4211    0.4238    0.3471
Pt    0.3721    0.4234    0.2957
Pt    0.3674    0.4263    0.3487
Pt    0.4231    0.4225    0.2940
Pt    0.3714    0.4756    0.2947
Pt    0.3704    0.4750    0.3460
Pt    0.4972    0.4244    0.2717
Pt    0.4193    0.2732    0.2963
Pt    0.4191    0.2710    0.3454
Pt    0.4007    0.4971    0.2495
Pt    0.4177    0.3234    0.2973
Pt    0.4209    0.3227    0.3484
Pt    0.4217    0.3753    0.3466
Pt    0.4199    0.3711    0.2993
Pt    0.4473    0.3013    0.2491
Pt    0.4234    0.2509    0.3715
Pt    0.4490    0.4750    0.3720
Pt    0.3515    0.2729    0.3684
Pt    0.2480    0.4250    0.2742
Pt    0.4465    0.3245    0.3716
Pt    0.4444    0.3496    0.2488
Pt    0.4969    0.4490    0.2503
Pt    0.3971    0.4736    0.3716
Pt    0.4971    0.4222    0.3198
Pt    0.3233    0.4979    0.3239
Pt    0.4977    0.3467    0.3460
Pt    0.4702    0.3979    0.3696
Pt    0.4210    0.3727    0.2495
Pt    0.4961    0.3968    0.3481
Pt    0.3958    0.3990    0.2494
Pt    0.4742    0.4963    0.3237
Pt    0.4934    0.4218    0.3728
Pt    0.3244    0.2961    0.3692
Pt    0.4456    0.2722    0.3714
Pt    0.3755    0.4976    0.3210
Pt    0.4198    0.3475    0.3709
Pt    0.3967    0.3237    0.3725
Pt    0.3737    0.3516    0.3702
Pt    0.3439    0.3986    0.2498
Pt    0.4446    0.3748    0.3711
Pt    0.4975    0.3216    0.3717
Pt    0.4698    0.2962    0.3711
Pt    0.3487    0.3212    0.3711
Pt    0.3750    0.3004    0.3727
Pt    0.4245    0.4478    0.3726
Pt    0.4724    0.2500    0.3722
Pt    0.4708    0.3501    0.3724
Pt    0.2719    0.4020    0.3723
Pt    0.4247    0.4005    0.3725
Pt    0.4955    0.4000    0.2485
Pt    0.4735    0.4746    0.2479
Pt    0.3219    0.4745    0.2482
Pt    0.4239    0.4204    0.2483
Pt    0.2487    0.4212    0.4779
Pt    0.3999    0.3775    0.3733
Pt    0.4744    0.4744    0.4487
Pt    0.3986    0.4242    0.3744
Pt    0.4698    0.4738    0.3965
Pt    0.3248    0.2487    0.4671
Pt    0.4731    0.4211    0.4490
Pt    0.4725    0.4249    0.3987
Pt    0.4716    0.3716    0.4465
Pt    0.2982    0.4771    0.3741
Pt    0.2993    0.2968    0.3918
Pt    0.2973    0.2993    0.4452
Pt    0.2944    0.3517    0.4005
Pt    0.2986    0.3476    0.4485
Pt    0.2977    0.4003    0.3975
Pt    0.2960    0.4003    0.4499
Pt    0.2994    0.4505    0.3998
Pt    0.2957    0.4494    0.4499
Pt    0.2488    0.3236    0.4238
Pt    0.3475    0.4256    0.3772
Pt    0.3472    0.2972    0.3964
Pt    0.3451    0.2966    0.4446
Pt    0.3475    0.3478    0.3983
Pt    0.3513    0.3490    0.4463
Pt    0.3446    0.3986    0.3995
Pt    0.3475    0.4003    0.4503
Pt    0.3469    0.4507    0.4017
Pt    0.3460    0.4492    0.4497
Pt    0.2940    0.3268    0.3755
Pt    0.4969    0.4480    0.3959
Pt    0.3985    0.2975    0.3972
Pt    0.3983    0.2978    0.4480
Pt    0.3942    0.3521    0.3958
Pt    0.3986    0.3504    0.4478
Pt    0.3994    0.3998    0.3979
Pt    0.3999    0.3980    0.4486
Pt    0.3985    0.4497    0.3972
Pt    0.3983    0.4485    0.4498
Pt    0.3734    0.2506    0.4187
Pt    0.2506    0.2976    0.3972
Pt    0.4460    0.2984    0.3960
Pt    0.4482    0.2968    0.4473
Pt    0.4462    0.3475    0.3989
Pt    0.4490    0.3429    0.4471
Pt    0.4498    0.4003    0.3981
Pt    0.4450    0.3987    0.4460
Pt    0.4471    0.4496    0.3995
Pt    0.4490    0.4493    0.4507
Pt    0.4706    0.3714    0.4001
Pt    0.2483    0.3751    0.3752
Pt    0.4968    0.2704    0.4691
Pt    0.2497    0.2745    0.4184
Pt    0.4750    0.3200    0.4461
Pt    0.3226    0.4510    0.3741
Pt    0.4969    0.4223    0.4213
Pt    0.4707    0.3239    0.3953
Pt    0.3231    0.4231    0.4500
Pt    0.4741    0.2703    0.4428
Pt    0.4716    0.2724    0.4012
Pt    0.4239    0.4758    0.4468
Pt    0.4242    0.4751    0.3968
Pt    0.4240    0.4240    0.4507
Pt    0.3001    0.2733    0.4170
Pt    0.2980    0.2734    0.4702
Pt    0.3235    0.4245    0.4004
Pt    0.2941    0.3257    0.4209
Pt    0.2989    0.3250    0.4735
Pt    0.3474    0.4970    0.3999
Pt    0.2988    0.3738    0.4244
Pt    0.2996    0.3747    0.4738
Pt    0.4216    0.2488    0.4205
Pt    0.2968    0.4240    0.4224
Pt    0.2969    0.4255    0.4740
Pt    0.4735    0.2700    0.4963
Pt    0.2986    0.4742    0.4239
Pt    0.2966    0.4740    0.4740
Pt    0.4972    0.3216    0.4727
Pt    0.3470    0.2734    0.4191
Pt    0.3498    0.2745    0.4718
Pt    0.3506    0.4740    0.3753
Pt    0.3490    0.3234    0.4216
Pt    0.3495    0.3245    0.4700
Pt    0.2702    0.3516    0.3750
Pt    0.3463    0.3730    0.4231
Pt    0.3499    0.3745    0.4707
Pt    0.2943    0.3772    0.3749
Pt    0.3474    0.4237    0.4220
Pt    0.3452    0.4260    0.4738
Pt    0.3231    0.3742    0.4489
Pt    0.3484    0.4739    0.4263
Pt    0.3476    0.4730    0.4736
Pt    0.2714    0.4505    0.3751
Pt    0.3961    0.2762    0.4222
Pt    0.3980    0.2716    0.4708
Pt    0.4964    0.2949    0.4438
Pt    0.3986    0.3232    0.4200
Pt    0.3991    0.3251    0.4712
Pt    0.3497    0.2499    0.3973
Pt    0.3973    0.3752    0.4233
Pt    0.3991    0.3737    0.4735
Pt    0.4963    0.3467    0.4472
Pt    0.4006    0.4224    0.4226
Pt    0.3981    0.4237    0.4763
Pt    0.4009    0.2485    0.4956
Pt    0.3995    0.4716    0.4241
Pt    0.3960    0.4727    0.4750
Pt    0.3977    0.4980    0.4001
Pt    0.4475    0.2710    0.4231
Pt    0.4505    0.2715    0.4726
Pt    0.3216    0.3756    0.3980
Pt    0.4484    0.3221    0.4231
Pt    0.4518    0.3225    0.4749
Pt    0.3989    0.2509    0.4461
Pt    0.4430    0.3690    0.4225
Pt    0.4469    0.3736    0.4700
Pt    0.2484    0.3236    0.4711
Pt    0.4501    0.4250    0.4231
Pt    0.4501    0.4210    0.4739
Pt    0.2483    0.4486    0.4479
Pt    0.4483    0.4710    0.4261
Pt    0.4511    0.4743    0.4747
Pt    0.3225    0.3984    0.3732
Pt    0.3236    0.3214    0.4454
Pt    0.3207    0.3244    0.3993
Pt    0.2734    0.2986    0.4218
Pt    0.2754    0.2989    0.4725
Pt    0.3461    0.3485    0.4954
Pt    0.2694    0.3484    0.4264
Pt    0.2759    0.3481    0.4730
Pt    0.3740    0.2712    0.4975
Pt    0.2728    0.3963    0.4278
Pt    0.2745    0.3975    0.4784
Pt    0.4218    0.4982    0.4268
Pt    0.2710    0.4463    0.4226
Pt    0.2720    0.4489    0.4713
Pt    0.4236    0.4241    0.3949
Pt    0.4208    0.3723    0.4465
Pt    0.3207    0.2726    0.4429
Pt    0.3225    0.3000    0.4184
Pt    0.3198    0.2983    0.4683
Pt    0.3188    0.4757    0.4512
Pt    0.3226    0.3496    0.4225
Pt    0.3236    0.3500    0.4747
Pt    0.3722    0.3725    0.4461
Pt    0.3192    0.4002    0.4235
Pt    0.3213    0.3997    0.4727
Pt    0.3211    0.3251    0.4962
Pt    0.3224    0.4483    0.4254
Pt    0.3223    0.4509    0.4755
Pt    0.4947    0.3956    0.3960
Pt    0.3725    0.4488    0.3737
Pt    0.4217    0.3735    0.3967
Pt    0.3695    0.3748    0.3975
Pt    0.3717    0.2990    0.4214
Pt    0.3741    0.2978    0.4711
Pt    0.3719    0.4977    0.4211
Pt    0.3757    0.3471    0.4241
Pt    0.3730    0.3483    0.4703
Pt    0.3738    0.3211    0.4465
Pt    0.3735    0.3967    0.4244
Pt    0.3740    0.3984    0.4757
Pt    0.3222    0.4739    0.3995
Pt    0.3754    0.4455    0.4249
Pt    0.3724    0.4476    0.4734
Pt    0.3732    0.4947    0.4720
Pt    0.4958    0.4973    0.3972
Pt    0.4241    0.3228    0.4459
Pt    0.3725    0.3225    0.3966
Pt    0.4214    0.2977    0.4218
Pt    0.4238    0.3005    0.4717
Pt    0.3683    0.2735    0.4458
Pt    0.4213    0.3461    0.4217
Pt    0.4247    0.3477    0.4727
Pt    0.3714    0.2750    0.3968
Pt    0.4224    0.3972    0.4230
Pt    0.4215    0.3976    0.4748
Pt    0.4240    0.4957    0.4713
Pt    0.4219    0.4474    0.4253
Pt    0.4221    0.4506    0.4728
Pt    0.4213    0.3231    0.3946
Pt    0.4254    0.2723    0.4485
Pt    0.4223    0.2745    0.3978
Pt    0.3715    0.4702    0.4458
Pt    0.4710    0.2971    0.4205
Pt    0.4744    0.2957    0.4718
Pt    0.3751    0.4721    0.3990
Pt    0.4733    0.3466    0.4227
Pt    0.4724    0.3501    0.4735
Pt    0.3761    0.4189    0.4494
Pt    0.4715    0.3976    0.4222
Pt    0.4726    0.3943    0.4740
Pt    0.3737    0.4249    0.3983
Pt    0.4736    0.4492    0.4253
Pt    0.4725    0.4477    0.4729
Pt    0.2751    0.2760    0.3954
Pt    0.2704    0.2716    0.4438
Pt    0.2717    0.3227    0.3971
Pt    0.2732    0.3232    0.4501
Pt    0.2720    0.3764    0.3992
Pt    0.2731    0.3726    0.4504
Pt    0.2746    0.4214    0.3996
Pt    0.2717    0.4239    0.4484
Pt    0.2715    0.4770    0.3983
Pt    0.2740    0.4728    0.4486
Pt    0.3244    0.2713    0.3939
Pt    0.3198    0.3479    0.3759
Pt    0.4968    0.2962    0.4957
Pt    0.2997    0.2980    0.4977
Pt    0.4238    0.2732    0.4948
Pt    0.2759    0.4974    0.4243
Pt    0.3457    0.3728    0.3735
Pt    0.3971    0.3451    0.4967
Pt    0.2983    0.4269    0.3762
Pt    0.4976    0.3706    0.4220
Pt    0.2703    0.3707    0.4974
Pt    0.4467    0.4482    0.4972
Pt    0.3482    0.3991    0.4964
Pt    0.4460    0.3977    0.4964
Pt    0.3971    0.2972    0.4953
Pt    0.2504    0.2735    0.4691
Pt    0.2747    0.2731    0.4935
Pt    0.4970    0.2983    0.3984
Pt    0.2492    0.4762    0.4240
Pt    0.4692    0.4494    0.3755
Pt    0.3698    0.4009    0.3751
Pt    0.4971    0.4207    0.4730
Pt    0.3453    0.2970    0.4949
Pt    0.3221    0.2705    0.4936
Pt    0.4952    0.3455    0.3962
Pt    0.4958    0.4738    0.4218
Pt    0.2981    0.3504    0.4976
Pt    0.3250    0.3750    0.4964
Pt    0.3718    0.4746    0.4976
Pt    0.2986    0.4966    0.4964
Pt    0.3739    0.3703    0.4972
Pt    0.3741    0.2513    0.3736
Pt    0.4487    0.4222    0.3746
Pt    0.4977    0.3703    0.3739
Pt    0.3235    0.2491    0.5210
Pt    0.4708    0.4749    0.5988
Pt    0.2489    0.4503    0.5972
Pt    0.4718    0.4742    0.5477
Pt    0.3723    0.2489    0.5746
Pt    0.3241    0.4738    0.4981
Pt    0.3967    0.4957    0.5989
Pt    0.2500    0.2515    0.4991
Pt    0.4207    0.3239    0.5975
Pt    0.4701    0.4248    0.5970
Pt    0.4706    0.4246    0.5479
Pt    0.4735    0.2506    0.5729
Pt    0.2751    0.2507    0.5247
Pt    0.4724    0.3736    0.5991
Pt    0.4729    0.3769    0.5477
Pt    0.2486    0.4980    0.5513
Pt    0.4235    0.3205    0.5441
Pt    0.3242    0.3719    0.5458
Pt    0.2485    0.2497    0.5476
Pt    0.2954    0.2989    0.5457
Pt    0.2987    0.2975    0.5998
Pt    0.4255    0.2734    0.5968
Pt    0.3013    0.3450    0.5484
Pt    0.2992    0.3451    0.5968
Pt    0.4243    0.2707    0.5481
Pt    0.2971    0.3983    0.5505
Pt    0.2960    0.3957    0.5962
Pt    0.3217    0.3232    0.5980
Pt    0.2985    0.4516    0.5491
Pt    0.2974    0.4484    0.5974
Pt    0.4232    0.4738    0.5990
Pt    0.3695    0.4739    0.5991
Pt    0.4700    0.3720    0.5008
Pt    0.3723    0.4735    0.5499
Pt    0.3449    0.2978    0.5462
Pt    0.3484    0.2977    0.5936
Pt    0.3708    0.4207    0.6015
Pt    0.3521    0.3502    0.5490
Pt    0.3475    0.3465    0.5987
Pt    0.3722    0.4227    0.5501
Pt    0.3455    0.3997    0.5496
Pt    0.3425    0.3962    0.5983
Pt    0.4197    0.4770    0.5488
Pt    0.3487    0.4448    0.5467
Pt    0.3451    0.4492    0.6000
Pt    0.2987    0.4959    0.5996
Pt    0.3225    0.3212    0.5485
Pt    0.3483    0.4499    0.5022
Pt    0.2734    0.4967    0.5739
Pt    0.3968    0.2967    0.5431
Pt    0.4007    0.2961    0.6008
Pt    0.3714    0.3746    0.5986
Pt    0.3987    0.3477    0.5479
Pt    0.3974    0.3493    0.5985
Pt    0.4220    0.4249    0.5500
Pt    0.3964    0.4036    0.5506
Pt    0.3970    0.3982    0.5970
Pt    0.3222    0.2726    0.5991
Pt    0.3976    0.4486    0.5500
Pt    0.3961    0.4518    0.5993
Pt    0.4012    0.2496    0.5998
Pt    0.3728    0.3770    0.5485
Pt    0.3220    0.2743    0.5486
Pt    0.4237    0.4216    0.5995
Pt    0.4446    0.2961    0.5448
Pt    0.4458    0.3006    0.5966
Pt    0.4213    0.3749    0.5998
Pt    0.4499    0.3486    0.5487
Pt    0.4479    0.3482    0.5989
Pt    0.3755    0.3219    0.5974
Pt    0.4460    0.3994    0.5465
Pt    0.4493    0.3973    0.5987
Pt    0.3771    0.3229    0.5462
Pt    0.4454    0.4486    0.5480
Pt    0.4453    0.4477    0.6006
Pt    0.4976    0.4482    0.4985
Pt    0.2715    0.4706    0.5956
Pt    0.3213    0.4257    0.5495
Pt    0.3745    0.2738    0.5968
Pt    0.3724    0.2732    0.5455
Pt    0.4713    0.2732    0.5491
Pt    0.4734    0.3223    0.5964
Pt    0.4705    0.3226    0.5525
Pt    0.2730    0.4723    0.5489
Pt    0.4754    0.2724    0.6015
Pt    0.3014    0.2738    0.5221
Pt    0.2955    0.2711    0.5712
Pt    0.2958    0.3229    0.5195
Pt    0.2979    0.3220    0.5732
Pt    0.2981    0.3709    0.5262
Pt    0.3005    0.3706    0.5728
Pt    0.2965    0.4241    0.5272
Pt    0.2979    0.4251    0.5737
Pt    0.2979    0.4754    0.5239
Pt    0.2993    0.4750    0.5749
Pt    0.3457    0.2725    0.5216
Pt    0.3491    0.2730    0.5718
Pt    0.3480    0.3246    0.5249
Pt    0.3498    0.3231    0.5696
Pt    0.3479    0.3730    0.5207
Pt    0.3467    0.3702    0.5736
Pt    0.3447    0.4189    0.5240
Pt    0.3483    0.4240    0.5745
Pt    0.3486    0.4754    0.5263
Pt    0.3471    0.4750    0.5730
Pt    0.3987    0.2700    0.5224
Pt    0.3967    0.2732    0.5707
Pt    0.3944    0.3208    0.5212
Pt    0.3986    0.3183    0.5728
Pt    0.3983    0.3768    0.5248
Pt    0.3976    0.3751    0.5733
Pt    0.3986    0.4236    0.5247
Pt    0.3963    0.4256    0.5754
Pt    0.3962    0.4747    0.5236
Pt    0.3966    0.4734    0.5757
Pt    0.4501    0.2717    0.5224
Pt    0.4490    0.2760    0.5734
Pt    0.4505    0.3215    0.5240
Pt    0.4459    0.3251    0.5733
Pt    0.4450    0.3717    0.5250
Pt    0.4457    0.3736    0.5750
Pt    0.4479    0.4232    0.5206
Pt    0.4487    0.4236    0.5719
Pt    0.4482    0.4728    0.5231
Pt    0.4454    0.4760    0.5702
Pt    0.2724    0.3737    0.5990
Pt    0.4960    0.2694    0.5251
Pt    0.2716    0.2977    0.5179
Pt    0.2732    0.2960    0.5717
Pt    0.2750    0.3473    0.5255
Pt    0.2730    0.3447    0.5747
Pt    0.2719    0.3940    0.5252
Pt    0.2703    0.3954    0.5745
Pt    0.2730    0.4489    0.5250
Pt    0.2740    0.4468    0.5712
Pt    0.3231    0.4714    0.6019
Pt    0.3197    0.3724    0.5989
Pt    0.3240    0.2989    0.5207
Pt    0.3190    0.2956    0.5729
Pt    0.3230    0.3468    0.5212
Pt    0.3230    0.3473    0.5720
Pt    0.3209    0.3980    0.5247
Pt    0.3226    0.3972    0.5724
Pt    0.3216    0.4491    0.5255
Pt    0.3231    0.4490    0.5723
Pt    0.4217    0.3740    0.5506
Pt    0.2495    0.4732    0.5244
Pt    0.3702    0.2954    0.5174
Pt    0.3721    0.2983    0.5669
Pt    0.3730    0.3489    0.5219
Pt    0.3758    0.3469    0.5757
Pt    0.3724    0.4019    0.5250
Pt    0.3690    0.3967    0.5757
Pt    0.3719    0.4453    0.5228
Pt    0.3724    0.4508    0.5715
Pt    0.2716    0.3239    0.5993
Pt    0.3245    0.4742    0.5497
Pt    0.4215    0.2927    0.5209
Pt    0.4227    0.2987    0.5725
Pt    0.4218    0.3487    0.5262
Pt    0.4233    0.3482    0.5711
Pt    0.4231    0.3978    0.5230
Pt    0.4230    0.3975    0.5739
Pt    0.4207    0.4492    0.5259
Pt    0.4209    0.4475    0.5757
Pt    0.3206    0.4240    0.6005
Pt    0.2727    0.4249    0.5953
Pt    0.4752    0.2968    0.5245
Pt    0.4743    0.2962    0.5734
Pt    0.4723    0.3482    0.5260
Pt    0.4721    0.3495    0.5729
Pt    0.4724    0.3994    0.5252
Pt    0.4718    0.3981    0.5742
Pt    0.4717    0.4490    0.5232
Pt    0.4678    0.4516    0.5718
Pt    0.2707    0.4205    0.5487
Pt    0.2694    0.2731    0.5486
Pt    0.2687    0.2738    0.5986
Pt    0.2727    0.3699    0.5514
Pt    0.2728    0.3224    0.5504
Pt    0.2719    0.4732    0.4992
Pt    0.4973    0.4981    0.5486
Pt    0.4972    0.2726    0.5756
Pt    0.3235    0.4244    0.4992
Pt    0.4971    0.4266    0.5253
Pt    0.4473    0.3465    0.5039
Pt    0.2477    0.3964    0.5016
Pt    0.4749    0.4224    0.4993
Pt    0.4495    0.2507    0.5969
Pt    0.2975    0.2501    0.5469
Pt    0.4732    0.4968    0.5222
Pt    0.4697    0.4972    0.5734
Pt    0.4976    0.3465    0.5964
Pt    0.2483    0.3715    0.5267
Pt    0.2718    0.3496    0.6201
Pt    0.2978    0.4493    0.5001
Pt    0.4965    0.3993    0.5487
Pt    0.4932    0.4250    0.5750
Pt    0.4218    0.4239    0.4984
Pt    0.4248    0.4974    0.5213
Pt    0.2485    0.4272    0.5223
Pt    0.4969    0.3722    0.5747
Pt    0.4961    0.3972    0.5981
Pt    0.4255    0.4733    0.4992
Pt    0.3725    0.4225    0.4991
Pt    0.4971    0.3710    0.5245
Pt    0.4942    0.3459    0.4996
Pt    0.3238    0.4972    0.5760
Pt    0.2702    0.4015    0.6184
Pt    0.3448    0.4973    0.6030
Pt    0.2966    0.4229    0.6227
Pt    0.4974    0.2949    0.5486
Pt    0.4230    0.3226    0.5005
Pt    0.4962    0.3220    0.5266
Pt    0.3971    0.3989    0.5009
Pt    0.3473    0.3195    0.6224
Pt    0.4949    0.4490    0.5973
Pt    0.4207    0.3697    0.4983
Pt    0.2982    0.4003    0.4996
Pt    0.4740    0.3206    0.4992
Pt    0.2928    0.2715    0.6214
Pt    0.2731    0.4236    0.5005
Pt    0.4956    0.4736    0.5736
Pt    0.4976    0.3194    0.5720
Pt    0.2703    0.3246    0.4989
Pt    0.3476    0.2732    0.6212
Pt    0.3692    0.3203    0.4997
Pt    0.2746    0.4452    0.6196
Pt    0.4946    0.3948    0.4992
Pt    0.3980    0.4500    0.5005
Pt    0.4479    0.3243    0.6228
Pt    0.3693    0.3477    0.6227
Pt    0.4715    0.2987    0.6205
Pt    0.2485    0.4719    0.6213
Pt    0.2942    0.3222    0.6225
Pt    0.3205    0.2977    0.6221
Pt    0.4481    0.2487    0.4979
Pt    0.4751    0.4719    0.4982
Pt    0.4491    0.2957    0.4983
Pt    0.4694    0.4710    0.7018
Pt    0.3469    0.4240    0.6234
Pt    0.2717    0.2504    0.7232
Pt    0.4186    0.4480    0.6240
Pt    0.3210    0.4484    0.6252
Pt    0.4210    0.2503    0.6723
Pt    0.2479    0.2768    0.7212
Pt    0.4216    0.3461    0.6230
Pt    0.4975    0.3698    0.6755
Pt    0.3960    0.3255    0.6241
Pt    0.2488    0.4505    0.6491
Pt    0.4257    0.4004    0.6237
Pt    0.2968    0.2960    0.6460
Pt    0.2925    0.2982    0.6958
Pt    0.2943    0.3470    0.6501
Pt    0.2952    0.3477    0.6970
Pt    0.2959    0.3983    0.6449
Pt    0.2929    0.3956    0.6970
Pt    0.2973    0.4482    0.6488
Pt    0.2976    0.4497    0.6998
Pt    0.4929    0.4752    0.6772
Pt    0.3252    0.4004    0.6267
Pt    0.3457    0.2929    0.6505
Pt    0.3445    0.2988    0.6987
Pt    0.3468    0.3449    0.6464
Pt    0.3462    0.3484    0.6968
Pt    0.3445    0.3961    0.6500
Pt    0.3464    0.4008    0.6975
Pt    0.3489    0.4485    0.6490
Pt    0.3458    0.4465    0.6987
Pt    0.3996    0.2492    0.6480
Pt    0.4522    0.2497    0.7469
Pt    0.3965    0.2968    0.6461
Pt    0.4000    0.2974    0.6973
Pt    0.3950    0.3491    0.6453
Pt    0.3983    0.3488    0.7019
Pt    0.4000    0.3986    0.6498
Pt    0.3961    0.3954    0.6990
Pt    0.3948    0.4446    0.6485
Pt    0.3977    0.4476    0.6997
Pt    0.3972    0.4754    0.6265
Pt    0.3458    0.3725    0.6262
Pt    0.4517    0.2964    0.6464
Pt    0.4492    0.2958    0.6955
Pt    0.4466    0.3474    0.6500
Pt    0.4468    0.3450    0.6980
Pt    0.4470    0.3985    0.6484
Pt    0.4498    0.3951    0.6967
Pt    0.4459    0.4479    0.6530
Pt    0.4514    0.4464    0.7014
Pt    0.3445    0.2963    0.7472
Pt    0.3979    0.3974    0.7459
Pt    0.4518    0.2495    0.6478
Pt    0.2714    0.3213    0.6486
Pt    0.4217    0.4716    0.6996
Pt    0.2724    0.2737    0.6965
Pt    0.4423    0.4718    0.6280
Pt    0.4195    0.4680    0.6535
Pt    0.2737    0.2715    0.6491
Pt    0.4749    0.2952    0.6738
Pt    0.4762    0.4459    0.7262
Pt    0.4716    0.4729    0.6497
Pt    0.4740    0.4199    0.6993
Pt    0.4775    0.2968    0.7224
Pt    0.4733    0.4445    0.6759
Pt    0.3212    0.3208    0.6496
Pt    0.2988    0.2701    0.6748
Pt    0.2948    0.2746    0.7219
Pt    0.3213    0.2738    0.6996
Pt    0.2964    0.3231    0.6719
Pt    0.2951    0.3245    0.7244
Pt    0.4240    0.4171    0.6991
Pt    0.2936    0.3712    0.6718
Pt    0.2949    0.3704    0.7224
Pt    0.4224    0.4257    0.6489
Pt    0.2954    0.4216    0.6719
Pt    0.2984    0.4266    0.7238
Pt    0.4230    0.3716    0.6994
Pt    0.2971    0.4725    0.6722
Pt    0.2950    0.4753    0.7235
Pt    0.4754    0.2735    0.6497
Pt    0.3478    0.2715    0.6725
Pt    0.3472    0.2722    0.7232
Pt    0.4230    0.3721    0.6495
Pt    0.3477    0.3226    0.6713
Pt    0.3494    0.3236    0.7240
Pt    0.2696    0.3226    0.6973
Pt    0.3441    0.3729    0.6728
Pt    0.3435    0.3719    0.7226
Pt    0.4726    0.3954    0.7243
Pt    0.3462    0.4237    0.6714
Pt    0.3417    0.4229    0.7219
Pt    0.3207    0.3708    0.6464
Pt    0.3456    0.4708    0.6748
Pt    0.3475    0.4736    0.7229
Pt    0.3232    0.2709    0.6459
Pt    0.3969    0.2727    0.6727
Pt    0.3997    0.2721    0.7256
Pt    0.2677    0.4761    0.7006
Pt    0.3964    0.3253    0.6740
Pt    0.4009    0.3210    0.7210
Pt    0.4223    0.3214    0.6951
Pt    0.3973    0.3707    0.6703
Pt    0.4015    0.3728    0.7244
Pt    0.2965    0.4958    0.6503
Pt    0.3982    0.4215    0.6744
Pt    0.3997    0.4211    0.7220
Pt    0.4221    0.3219    0.6460
Pt    0.3932    0.4738    0.6757
Pt    0.3950    0.4736    0.7216
Pt    0.4214    0.2711    0.6995
Pt    0.4454    0.2737    0.6736
Pt    0.4508    0.2725    0.7214
Pt    0.4236    0.2724    0.6448
Pt    0.4487    0.3216    0.6715
Pt    0.4504    0.3222    0.7212
Pt    0.2714    0.4756    0.6489
Pt    0.4462    0.3702    0.6735
Pt    0.4482    0.3713    0.7251
Pt    0.3703    0.4699    0.7000
Pt    0.4495    0.4216    0.6748
Pt    0.4488    0.4199    0.7194
Pt    0.4743    0.3951    0.6743
Pt    0.4471    0.4730    0.6737
Pt    0.4457    0.4717    0.7273
Pt    0.3701    0.4738    0.6474
Pt    0.3724    0.4228    0.6991
Pt    0.3205    0.3230    0.6964
Pt    0.3695    0.4209    0.6499
Pt    0.2727    0.2967    0.6714
Pt    0.2736    0.2990    0.7263
Pt    0.2712    0.2969    0.6235
Pt    0.2688    0.3476    0.6724
Pt    0.2705    0.3497    0.7214
Pt    0.3700    0.3736    0.6985
Pt    0.2684    0.3977    0.6721
Pt    0.2716    0.3949    0.7233
Pt    0.3704    0.3739    0.6504
Pt    0.2721    0.4496    0.6726
Pt    0.2708    0.4499    0.7209
Pt    0.4760    0.3466    0.7287
Pt    0.4739    0.3672    0.7005
Pt    0.4725    0.3482    0.6725
Pt    0.2723    0.4221    0.6965
Pt    0.3185    0.2948    0.6739
Pt    0.3185    0.2992    0.7229
Pt    0.3716    0.3209    0.6985
Pt    0.3196    0.3479    0.6747
Pt    0.3218    0.3475    0.7204
Pt    0.3731    0.3247    0.6469
Pt    0.3202    0.3950    0.6709
Pt    0.3196    0.3965    0.7224
Pt    0.3724    0.2714    0.6974
Pt    0.3217    0.4456    0.6733
Pt    0.3217    0.4497    0.7247
Pt    0.3728    0.2694    0.6458
Pt    0.4712    0.3748    0.6482
Pt    0.4771    0.3226    0.6962
Pt    0.2722    0.4214    0.6464
Pt    0.3739    0.2988    0.6716
Pt    0.3742    0.2963    0.7204
Pt    0.4718    0.4204    0.6507
Pt    0.3707    0.3494    0.6719
Pt    0.3718    0.3489    0.7225
Pt    0.2707    0.3740    0.6955
Pt    0.3729    0.3998    0.6741
Pt    0.3710    0.3975    0.7223
Pt    0.3187    0.4734    0.6994
Pt    0.3722    0.4460    0.6754
Pt    0.3711    0.4451    0.7227
Pt    0.4725    0.3224    0.6460
Pt    0.3221    0.4741    0.6495
Pt    0.4742    0.2712    0.6974
Pt    0.3205    0.4207    0.6963
Pt    0.4214    0.2983    0.6698
Pt    0.4248    0.2971    0.7216
Pt    0.3208    0.4240    0.6478
Pt    0.4224    0.3453    0.6737
Pt    0.4246    0.3464    0.7249
Pt    0.3190    0.3732    0.6997
Pt    0.4220    0.3956    0.6730
Pt    0.4241    0.3951    0.7252
Pt    0.2692    0.3726    0.6478
Pt    0.4243    0.4429    0.6782
Pt    0.4259    0.4468    0.7260
Pt    0.3733    0.2987    0.6239
Pt    0.4746    0.2489    0.6736
Pt    0.4920    0.4979    0.7020
Pt    0.4958    0.4969    0.6508
Pt    0.4455    0.4932    0.6979
Pt    0.2724    0.4243    0.7470
Pt    0.3699    0.3952    0.6235
Pt    0.3749    0.4972    0.6238
Pt    0.2714    0.4962    0.6231
Pt    0.3934    0.4982    0.7004
Pt    0.4497    0.2716    0.6237
Pt    0.4685    0.4967    0.7260
Pt    0.4952    0.4268    0.6248
Pt    0.3470    0.4973    0.6998
Pt    0.4703    0.4983    0.6241
Pt    0.3242    0.4982    0.6722
Pt    0.3952    0.2739    0.6233
Pt    0.3966    0.3728    0.6243
Pt    0.4467    0.4259    0.6262
Pt    0.2480    0.3735    0.6234
Pt    0.3209    0.3244    0.7440
Pt    0.4511    0.2973    0.7453
Pt    0.3714    0.4461    0.6230
Pt    0.3217    0.3449    0.6248
Pt    0.4938    0.4717    0.7272
Pt    0.4687    0.4502    0.6252
Pt    0.4201    0.4956    0.6720
Pt    0.3780    0.3224    0.7474
Pt    0.2477    0.2491    0.6957
Pt    0.4801    0.2712    0.7446
Pt    0.4248    0.2750    0.7462
Pt    0.4948    0.3490    0.6476
Pt    0.4474    0.3720    0.6235
Pt    0.3750    0.3728    0.7452
Pt    0.4691    0.4018    0.6232
Pt    0.3706    0.2743    0.7439
Pt    0.3948    0.4454    0.7457
Pt    0.2948    0.2508    0.7474
Pt    0.3451    0.4733    0.6263
Pt    0.4961    0.3726    0.6243
Pt    0.4974    0.4493    0.7003
Pt    0.4973    0.2767    0.6264
Pt    0.4459    0.4965    0.6500
Pt    0.3464    0.2488    0.7471
Pt    0.4962    0.4708    0.6265
Pt    0.3200    0.2741    0.7461
Pt    0.4240    0.2986    0.6234
Pt    0.3462    0.4980    0.6482
Pt    0.3227    0.3718    0.7471
Pt    0.3471    0.3501    0.7447
Pt    0.3444    0.3969    0.7440
Pt    0.2959    0.4506    0.7477
Pt    0.3213    0.4745    0.7459
Pt    0.3446    0.4975    0.7464
Pt    0.4288    0.3209    0.7470
Pt    0.2709    0.2740    0.7478
Pt    0.3692    0.4202    0.7475
Pt    0.2953    0.3976    0.7470
Pt    0.4483    0.3493    0.7478
Pt    0.4466    0.3979    0.7474
Pt    0.3955    0.4193    0.6239
Pt    0.4730    0.3477    0.6236
Pt    0.2966    0.3707    0.6231
Pt    0.2949    0.4731    0.6229
Pt    0.2686    0.2491    0.7756
Pt    0.2478    0.2995    0.7973
Pt    0.4689    0.4725    0.8495
Pt    0.4752    0.4463    0.8238
Pt    0.4737    0.4476    0.7758
Pt    0.4714    0.4722    0.8025
Pt    0.4724    0.4953    0.7757
Pt    0.3958    0.4982    0.8449
Pt    0.4733    0.4220    0.8496
Pt    0.4743    0.4231    0.7988
Pt    0.3203    0.2499    0.7704
Pt    0.4729    0.3709    0.8500
Pt    0.4734    0.3711    0.7998
Pt    0.2718    0.4744    0.7482
Pt    0.4757    0.3228    0.8453
Pt    0.3752    0.2504    0.8261
Pt    0.3434    0.4964    0.7971
Pt    0.2491    0.4190    0.8203
Pt    0.2693    0.2488    0.8235
Pt    0.2984    0.2989    0.7966
Pt    0.2972    0.2981    0.8508
Pt    0.4741    0.3214    0.7492
Pt    0.3002    0.3496    0.7991
Pt    0.2963    0.3497    0.8464
Pt    0.3743    0.4746    0.7480
Pt    0.2994    0.3951    0.7974
Pt    0.2974    0.3970    0.8488
Pt    0.3430    0.4977    0.8460
Pt    0.2997    0.4452    0.7958
Pt    0.2966    0.4444    0.8471
Pt    0.4481    0.4970    0.8024
Pt    0.4496    0.4963    0.8483
Pt    0.4771    0.3964    0.8286
Pt    0.2485    0.4442    0.8448
Pt    0.3475    0.3028    0.7955
Pt    0.3452    0.2983    0.8455
Pt    0.3480    0.4447    0.7494
Pt    0.3491    0.3458    0.7978
Pt    0.3477    0.3466    0.8479
Pt    0.3186    0.4953    0.8236
Pt    0.3484    0.3966    0.7967
Pt    0.3486    0.4001    0.8461
Pt    0.2705    0.3243    0.7485
Pt    0.3479    0.4474    0.7990
Pt    0.3499    0.4483    0.8452
Pt    0.2969    0.3478    0.7509
Pt    0.4231    0.3712    0.7521
Pt    0.3705    0.4978    0.8212
Pt    0.4692    0.4697    0.7525
Pt    0.4004    0.2984    0.7961
Pt    0.3999    0.2958    0.8500
Pt    0.4741    0.4973    0.8279
Pt    0.4008    0.3487    0.8032
Pt    0.4002    0.3478    0.8495
Pt    0.3737    0.2495    0.7673
Pt    0.3980    0.3943    0.8000
Pt    0.3981    0.3961    0.8493
Pt    0.3749    0.3742    0.8476
Pt    0.3973    0.4475    0.7978
Pt    0.3980    0.4459    0.8469
Pt    0.3202    0.2487    0.8232
Pt    0.4962    0.4719    0.8298
Pt    0.4010    0.2519    0.8465
Pt    0.3739    0.3711    0.7965
Pt    0.4504    0.2967    0.7959
Pt    0.4516    0.2989    0.8482
Pt    0.3724    0.3215    0.8477
Pt    0.4469    0.3489    0.7985
Pt    0.4491    0.3465    0.8479
Pt    0.4250    0.4468    0.8711
Pt    0.4526    0.3985    0.8003
Pt    0.4515    0.3981    0.8476
Pt    0.2984    0.4224    0.8727
Pt    0.4491    0.4475    0.7984
Pt    0.4480    0.4470    0.8476
Pt    0.4721    0.3962    0.7723
Pt    0.4752    0.3228    0.7956
Pt    0.3739    0.3242    0.7971
Pt    0.3972    0.4981    0.7504
Pt    0.4757    0.2726    0.8493
Pt    0.4776    0.2731    0.7967
Pt    0.3730    0.2735    0.8486
Pt    0.4232    0.4712    0.8487
Pt    0.4224    0.4702    0.8011
Pt    0.2677    0.2519    0.8714
Pt    0.4226    0.4218    0.8492
Pt    0.4231    0.4211    0.7972
Pt    0.3767    0.2739    0.7953
Pt    0.4273    0.3728    0.8488
Pt    0.3199    0.4706    0.8484
Pt    0.2955    0.2726    0.7775
Pt    0.2990    0.2754    0.8224
Pt    0.3217    0.4705    0.7957
Pt    0.2974    0.3243    0.7727
Pt    0.2973    0.3223    0.8234
Pt    0.3247    0.4222    0.8492
Pt    0.2978    0.3725    0.7731
Pt    0.2995    0.3721    0.8228
Pt    0.3232    0.4214    0.7958
Pt    0.2959    0.4217    0.7707
Pt    0.3003    0.4198    0.8208
Pt    0.4474    0.2499    0.8497
Pt    0.2974    0.4739    0.7750
Pt    0.2972    0.4694    0.8239
Pt    0.2943    0.4967    0.8494
Pt    0.3496    0.2722    0.7722
Pt    0.3476    0.2729    0.8234
Pt    0.3239    0.3718    0.8498
Pt    0.3499    0.3251    0.7686
Pt    0.3473    0.3227    0.8224
Pt    0.3276    0.3718    0.7980
Pt    0.3500    0.3728    0.7735
Pt    0.3512    0.3726    0.8239
Pt    0.3750    0.3507    0.8721
Pt    0.3445    0.4222    0.7726
Pt    0.3474    0.4214    0.8233
Pt    0.4922    0.4496    0.8531
Pt    0.3489    0.4704    0.7732
Pt    0.3455    0.4724    0.8193
Pt    0.3713    0.2505    0.8727
Pt    0.3964    0.2722    0.7702
Pt    0.4010    0.2735    0.8215
Pt    0.3217    0.3231    0.8514
Pt    0.4024    0.3235    0.7700
Pt    0.3975    0.3226    0.8276
Pt    0.3984    0.4219    0.8723
Pt    0.3983    0.3743    0.7748
Pt    0.3972    0.3723    0.8239
Pt    0.4229    0.4719    0.7514
Pt    0.3946    0.4228    0.7691
Pt    0.3973    0.4218    0.8204
Pt    0.4743    0.3494    0.8242
Pt    0.3961    0.4724    0.7732
Pt    0.3967    0.4705    0.8226
Pt    0.4752    0.2497    0.7718
Pt    0.4490    0.2718    0.7688
Pt    0.4527    0.2738    0.8217
Pt    0.3214    0.3249    0.7991
Pt    0.4497    0.3207    0.7726
Pt    0.4524    0.3236    0.8195
Pt    0.4703    0.3477    0.7739
Pt    0.4483    0.3728    0.7755
Pt    0.4506    0.3738    0.8235
Pt    0.3721    0.4469    0.8722
Pt    0.4497    0.4203    0.7734
Pt    0.4507    0.4232    0.8244
Pt    0.3207    0.2722    0.8477
Pt    0.4454    0.4745    0.7777
Pt    0.4457    0.4716    0.8252
Pt    0.4754    0.2976    0.8208
Pt    0.4251    0.3746    0.8026
Pt    0.3210    0.2745    0.7972
Pt    0.2725    0.2984    0.7712
Pt    0.2737    0.2982    0.8215
Pt    0.2731    0.4725    0.8494
Pt    0.2718    0.3475    0.7769
Pt    0.2725    0.3514    0.8220
Pt    0.2722    0.4724    0.7990
Pt    0.2711    0.3975    0.7722
Pt    0.2746    0.3966    0.8222
Pt    0.2731    0.4218    0.8467
Pt    0.2715    0.4508    0.7764
Pt    0.2750    0.4459    0.8211
Pt    0.2738    0.4222    0.7957
Pt    0.4241    0.3233    0.8483
Pt    0.4248    0.3246    0.7950
Pt    0.2713    0.3734    0.8487
Pt    0.3234    0.3026    0.7736
Pt    0.3211    0.3003    0.8242
Pt    0.2705    0.3736    0.7967
Pt    0.3209    0.3481    0.7730
Pt    0.3237    0.3494    0.8245
Pt    0.2691    0.3220    0.8505
Pt    0.3220    0.3968    0.7722
Pt    0.3238    0.3953    0.8238
Pt    0.4753    0.2958    0.7703
Pt    0.3228    0.4483    0.7699
Pt    0.3239    0.4472    0.8240
Pt    0.3764    0.4194    0.7979
Pt    0.4266    0.2751    0.8481
Pt    0.4228    0.2748    0.7978
Pt    0.2752    0.3229    0.7981
Pt    0.3712    0.2997    0.7710
Pt    0.3758    0.2967    0.8253
Pt    0.3738    0.4209    0.8495
Pt    0.3746    0.3480    0.7720
Pt    0.3734    0.3468    0.8253
Pt    0.4222    0.4467    0.8214
Pt    0.3732    0.3988    0.7742
Pt    0.3742    0.3983    0.8247
Pt    0.4196    0.4461    0.7742
Pt    0.3727    0.4461    0.7771
Pt    0.3736    0.4452    0.8241
Pt    0.2700    0.2741    0.7998
Pt    0.3709    0.4750    0.8444
Pt    0.3750    0.4729    0.7972
Pt    0.2723    0.2743    0.8479
Pt    0.4251    0.2962    0.7726
Pt    0.4239    0.3002    0.8227
Pt    0.4231    0.3985    0.8246
Pt    0.4215    0.3492    0.7758
Pt    0.4249    0.3475    0.8237
Pt    0.4213    0.3991    0.7727
Pt    0.2487    0.4708    0.8259
Pt    0.4275    0.2501    0.8205
Pt    0.2725    0.4463    0.8719
Pt    0.2985    0.3000    0.7505
Pt    0.3506    0.2489    0.7956
Pt    0.4965    0.4481    0.7540
Pt    0.4214    0.2486    0.7731
Pt    0.3466    0.4710    0.8703
Pt    0.2975    0.3740    0.8719
Pt    0.3211    0.4208    0.7488
Pt    0.3247    0.3989    0.8726
Pt    0.2666    0.3703    0.7503
Pt    0.4238    0.4975    0.8688
Pt    0.4969    0.4927    0.7499
Pt    0.3976    0.2974    0.7488
Pt    0.3243    0.4976    0.8718
Pt    0.4760    0.2483    0.8225
Pt    0.4756    0.3721    0.7507
Pt    0.3471    0.2751    0.8683
Pt    0.4509    0.4441    0.7484
Pt    0.4752    0.4186    0.7491
Pt    0.2967    0.4973    0.7977
Pt    0.4217    0.4236    0.7484
Pt    0.4457    0.4948    0.7507
Pt    0.4766    0.2967    0.8727
Pt    0.3978    0.4701    0.8684
Pt    0.2723    0.4938    0.8241
Pt    0.4960    0.4981    0.8019
Pt    0.3729    0.4977    0.8700
Pt    0.4029    0.3708    0.8725
Pt    0.4261    0.3445    0.8727
Pt    0.2976    0.3258    0.8727
Pt    0.3497    0.3720    0.8728
Pt    0.3997    0.3493    0.7491
Pt    0.4511    0.2755    0.8733
Pt    0.2497    0.3957    0.9017
Pt    0.4796    0.3745    0.8979
Pt    0.4786    0.3293    0.9502
Pt    0.4755    0.3233    0.9006
Pt    0.4734    0.2713    0.9439
Pt    0.4779    0.2752    0.8995
Pt    0.4504    0.2486    0.9973
Pt    0.3475    0.2495    0.9479
Pt    0.2964    0.2489    0.8987
Pt    0.2488    0.4233    0.9248
Pt    0.4460    0.2487    0.9490
Pt    0.2995    0.3002    0.8993
Pt    0.3009    0.2996    0.9490
Pt    0.2959    0.3501    0.9007
Pt    0.2981    0.3508    0.9485
Pt    0.2988    0.3974    0.8964
Pt    0.2983    0.3988    0.9455
Pt    0.2991    0.4499    0.8981
Pt    0.2985    0.4488    0.9485
Pt    0.2512    0.3970    0.9501
Pt    0.3223    0.4475    0.8734
Pt    0.3431    0.2975    0.8968
Pt    0.3454    0.2985    0.9511
Pt    0.3498    0.3511    0.8995
Pt    0.3512    0.3475    0.9482
Pt    0.3509    0.4010    0.8983
Pt    0.3494    0.3972    0.9456
Pt    0.3487    0.4454    0.8985
Pt    0.3470    0.4457    0.9491
Pt    0.3005    0.4964    0.8945
Pt    0.2508    0.4484    0.9499
Pt    0.3963    0.3004    0.9002
Pt    0.3971    0.2984    0.9505
Pt    0.4004    0.3460    0.8978
Pt    0.3980    0.3491    0.9461
Pt    0.3999    0.3988    0.8954
Pt    0.3989    0.4016    0.9468
Pt    0.4011    0.4472    0.8937
Pt    0.3990    0.4503    0.9448
Pt    0.2709    0.3955    0.8731
Pt    0.4527    0.3230    0.8737
Pt    0.4515    0.2980    0.9005
Pt    0.4483    0.2989    0.9475
Pt    0.4507    0.3511    0.8991
Pt    0.4485    0.3511    0.9480
Pt    0.4485    0.3964    0.9017
Pt    0.4462    0.3954    0.9454
Pt    0.4496    0.4480    0.8932
Pt    0.4489    0.3739    0.8744
Pt    0.4254    0.4764    0.8968
Pt    0.4246    0.4230    0.9475
Pt    0.4256    0.4218    0.8939
Pt    0.4235    0.3733    0.9483
Pt    0.4235    0.3723    0.9003
Pt    0.2513    0.4465    0.8994
Pt    0.2729    0.2492    0.9695
Pt    0.2516    0.3217    0.9230
Pt    0.4009    0.4281    0.9696
Pt    0.3974    0.2738    0.8763
Pt    0.2971    0.2728    0.9231
Pt    0.2969    0.2724    0.9737
Pt    0.2983    0.3236    0.9236
Pt    0.2982    0.3230    0.9718
Pt    0.2972    0.3737    0.9220
Pt    0.2983    0.3754    0.9733
Pt    0.2990    0.4241    0.9198
Pt    0.3006    0.4200    0.9722
Pt    0.2977    0.4735    0.9227
Pt    0.3000    0.4717    0.9736
Pt    0.3446    0.2719    0.9234
Pt    0.3477    0.2736    0.9735
Pt    0.3477    0.3245    0.9234
Pt    0.3487    0.3230    0.9762
Pt    0.3494    0.3722    0.9252
Pt    0.3481    0.3713    0.9737
Pt    0.3474    0.4214    0.9241
Pt    0.3483    0.4230    0.9748
Pt    0.3485    0.4739    0.9218
Pt    0.3464    0.4713    0.9734
Pt    0.3947    0.2739    0.9214
Pt    0.3973    0.2748    0.9723
Pt    0.4034    0.3230    0.9249
Pt    0.4001    0.3233    0.9706
Pt    0.3996    0.3751    0.9210
Pt    0.3976    0.3759    0.9723
Pt    0.3977    0.4277    0.9235
Pt    0.3986    0.4723    0.9175
Pt    0.4487    0.2730    0.9241
Pt    0.4476    0.2720    0.9716
Pt    0.4515    0.3246    0.9251
Pt    0.4510    0.3271    0.9738
Pt    0.4469    0.3736    0.9232
Pt    0.4488    0.4221    0.9218
Pt    0.3997    0.3196    0.8731
Pt    0.4259    0.3237    0.9492
Pt    0.4271    0.3226    0.9004
Pt    0.2739    0.2988    0.9256
Pt    0.2721    0.2959    0.9727
Pt    0.2728    0.3497    0.9248
Pt    0.2733    0.3484    0.9748
Pt    0.2739    0.3995    0.9260
Pt    0.2738    0.3978    0.9745
Pt    0.2752    0.4486    0.9240
Pt    0.2750    0.4470    0.9741
Pt    0.4216    0.2748    0.9505
Pt    0.4217    0.2495    0.8742
Pt    0.3223    0.2998    0.9225
Pt    0.3240    0.2985    0.9742
Pt    0.3231    0.3499    0.9241
Pt    0.3229    0.3468    0.9750
Pt    0.3245    0.3966    0.9242
Pt    0.3295    0.3971    0.9734
Pt    0.3230    0.4491    0.9216
Pt    0.3245    0.4467    0.9760
Pt    0.4240    0.2726    0.8968
Pt    0.3942    0.2506    0.9475
Pt    0.3693    0.2984    0.9258
Pt    0.3708    0.2990    0.9724
Pt    0.3749    0.3470    0.9215
Pt    0.3762    0.3476    0.9740
Pt    0.3746    0.3992    0.9232
Pt    0.3752    0.4009    0.9742
Pt    0.3724    0.4490    0.9239
Pt    0.4265    0.2999    0.8744
Pt    0.2490    0.4205    0.9740
Pt    0.4227    0.2940    0.9231
Pt    0.4239    0.3002    0.9750
Pt    0.4236    0.3467    0.9229
Pt    0.4252    0.3488    0.9728
Pt    0.4221    0.4014    0.9231
Pt    0.4266    0.4485    0.9197
Pt    0.3965    0.2484    0.8977
Pt    0.2976    0.2485    0.9501
Pt    0.4748    0.3008    0.9260
Pt    0.4703    0.2979    0.9735
Pt    0.4737    0.3520    0.9222
Pt    0.4190    0.3992    0.9720
Pt    0.2704    0.2744    0.9017
Pt    0.2704    0.2730    0.9472
Pt    0.2730    0.3232    0.8982
Pt    0.2711    0.3235    0.9507
Pt    0.2713    0.3735    0.8991
Pt    0.2717    0.3728    0.9490
Pt    0.2745    0.4224    0.8965
Pt    0.2741    0.4232    0.9499
Pt    0.2725    0.4722    0.8978
Pt    0.2743    0.4718    0.9487
Pt    0.3233    0.2725    0.8944
Pt    0.3242    0.2737    0.9475
Pt    0.3223    0.3267    0.8959
Pt    0.3252    0.3258    0.9486
Pt    0.3258    0.3749    0.9016
Pt    0.3228    0.3725    0.9503
Pt    0.3225    0.4214    0.8953
Pt    0.3228    0.4215    0.9466
Pt    0.3241    0.4724    0.8968
Pt    0.3257    0.4738    0.9470
Pt    0.3696    0.2776    0.9006
Pt    0.3714    0.2732    0.9479
Pt    0.3732    0.3227    0.8975
Pt    0.3726    0.3232    0.9479
Pt    0.3723    0.3750    0.8993
Pt    0.3741    0.3736    0.9500
Pt    0.3764    0.4236    0.9002
Pt    0.3729    0.4229    0.9516
Pt    0.3736    0.4745    0.8954
Pt    0.3747    0.4744    0.9450
Pt    0.3221    0.3516    0.8753
Pt    0.4758    0.3478    0.8760
Pt    0.3471    0.4239    0.8735
Pt    0.3730    0.2486    0.9239
Pt    0.2479    0.3712    0.9754
Pt    0.3738    0.4479    0.9718
Pt    0.3731    0.2505    0.9755
Pt    0.3476    0.2492    0.8985
Pt    0.4967    0.2742    0.9707
Pt    0.3454    0.3243    0.8737
Pt    0.3699    0.2983    0.8732
Pt    0.2736    0.4982    0.8759
Pt    0.4203    0.2537    0.9245
Pt    0.2769    0.4962    0.9209
Pt    0.2991    0.4972    0.9505
Pt    0.3240    0.4948    0.9748
Pt    0.4951    0.3009    0.9927
Pt    0.3491    0.4477    0.9966
Pt    0.3490    0.4956    0.8945
Pt    0.2479    0.3167    0.9743
Pt    0.2975    0.2741    0.8743
Pt    0.3765    0.4257    0.9974
Pt    0.2479    0.3471    0.9004
Pt    0.3972    0.3012    0.9978
Pt    0.2478    0.4212    0.8739
Pt    0.4004    0.4956    0.8936
Pt    0.2499    0.4728    0.9259
Pt    0.3490    0.4978    0.9492
Pt    0.2719    0.2990    0.8747
Pt    0.2966    0.3467    0.9951
Pt    0.3991    0.3504    0.9954
Pt    0.2757    0.3205    0.9969
Pt    0.4231    0.3253    0.9971
Pt    0.3522    0.3985    0.9978
Pt    0.2723    0.3498    0.8750
Pt    0.4739    0.3986    0.8752
Pt    0.3724    0.3976    0.8744
Pt    0.3205    0.2964    0.8741
Pt    0.4511    0.4206    0.8748
Pt    0.2969    0.4717    0.8748
Pt    0.2483    0.4964    0.8981
Pt    0.2517    0.4449    0.9978
Pt    0.2757    0.4205    0.9973
Pt    0.2971    0.4473    0.9977
Pt    0.3024    0.3955    0.9975
Pt    0.2756    0.2725    0.9978
Pt    0.2482    0.4695    0.8730
Pt    0.4261    0.3975    0.8733
Pt    0.2522    0.5461    0.0973
Pt    0.2493    0.7253    0.0220
Pt    0.2502    0.5231    0.1206
Pt    0.2515    0.7018    0.1002
Pt    0.2498    0.6499    0.0967
Pt    0.3757    0.7241    0.0439
Pt    0.4731    0.7451    0.0239
Pt    0.2504    0.5195    0.0723
Pt    0.4716    0.7218    0.0958
Pt    0.4488    0.7447    0.9985
Pt    0.4758    0.7214    0.0475
Pt    0.2505    0.6227    0.0236
Pt    0.3685    0.5737    0.0026
Pt    0.4743    0.6718    0.0987
Pt    0.4749    0.6708    0.0455
Pt    0.2493    0.5509    0.0030
Pt    0.2485    0.6751    0.0714
Pt    0.3941    0.5984    0.0017
Pt    0.4974    0.6258    0.1212
Pt    0.2986    0.5443    0.0472
Pt    0.3005    0.5449    0.0982
Pt    0.2487    0.5746    0.0247
Pt    0.2960    0.5961    0.0534
Pt    0.3020    0.6018    0.0980
Pt    0.2502    0.6241    0.0730
Pt    0.2994    0.6510    0.0459
Pt    0.2978    0.6512    0.0983
Pt    0.3711    0.7482    0.1224
Pt    0.2993    0.6984    0.0462
Pt    0.3011    0.7014    0.0962
Pt    0.4257    0.7466    0.0240
Pt    0.3021    0.6749    0.1205
Pt    0.3489    0.5462    0.0469
Pt    0.3494    0.5511    0.0968
Pt    0.2497    0.5449    0.0489
Pt    0.3468    0.5989    0.0473
Pt    0.3506    0.5963    0.0981
Pt    0.4478    0.7482    0.1004
Pt    0.3486    0.6501    0.0484
Pt    0.3512    0.6507    0.0969
Pt    0.2482    0.5207    0.0227
Pt    0.3502    0.6990    0.0471
Pt    0.3500    0.6963    0.0986
Pt    0.3997    0.5474    0.0493
Pt    0.3965    0.5481    0.0968
Pt    0.2487    0.6502    0.0452
Pt    0.3968    0.5985    0.0471
Pt    0.3994    0.5981    0.0988
Pt    0.4749    0.6972    0.1215
Pt    0.3977    0.6472    0.0476
Pt    0.4012    0.6481    0.0983
Pt    0.2492    0.7241    0.0721
Pt    0.3993    0.6980    0.0462
Pt    0.3996    0.7020    0.0991
Pt    0.4959    0.6966    0.0975
Pt    0.3721    0.7453    0.0702
Pt    0.4490    0.5495    0.0979
Pt    0.4447    0.5977    0.0445
Pt    0.4518    0.6025    0.0988
Pt    0.4714    0.7454    0.0752
Pt    0.4477    0.6481    0.0488
Pt    0.4500    0.6522    0.1003
Pt    0.3467    0.7473    0.0960
Pt    0.4466    0.6971    0.0452
Pt    0.4493    0.6971    0.0971
Pt    0.4977    0.6688    0.0204
Pt    0.4258    0.5675    0.0966
Pt    0.3268    0.6985    0.1226
Pt    0.3726    0.7247    0.0971
Pt    0.4267    0.5696    0.0480
Pt    0.3978    0.7479    0.0447
Pt    0.4733    0.6274    0.0973
Pt    0.4696    0.6208    0.0458
Pt    0.4730    0.5749    0.1001
Pt    0.3997    0.7448    0.0990
Pt    0.2985    0.5203    0.0203
Pt    0.3014    0.5212    0.0748
Pt    0.2970    0.5694    0.0237
Pt    0.2971    0.5714    0.0766
Pt    0.2954    0.6232    0.0247
Pt    0.2961    0.6267    0.0745
Pt    0.3002    0.6739    0.0200
Pt    0.2997    0.6763    0.0695
Pt    0.2977    0.7228    0.0197
Pt    0.2983    0.7239    0.0711
Pt    0.3513    0.5170    0.0258
Pt    0.3522    0.5195    0.0735
Pt    0.3459    0.5727    0.0270
Pt    0.3475    0.5737    0.0726
Pt    0.3456    0.6244    0.0220
Pt    0.3501    0.6217    0.0721
Pt    0.3480    0.6727    0.0210
Pt    0.3506    0.6741    0.0717
Pt    0.3480    0.7225    0.0214
Pt    0.3462    0.7238    0.0704
Pt    0.3979    0.5218    0.0732
Pt    0.3991    0.5729    0.0258
Pt    0.3977    0.5722    0.0705
Pt    0.3961    0.6270    0.0229
Pt    0.4010    0.6240    0.0733
Pt    0.3992    0.6708    0.0213
Pt    0.3986    0.6723    0.0729
Pt    0.4008    0.7211    0.0196
Pt    0.3976    0.7229    0.0736
Pt    0.4975    0.6955    0.0464
Pt    0.4495    0.5772    0.0753
Pt    0.4463    0.6244    0.0232
Pt    0.4510    0.6215    0.0707
Pt    0.4502    0.6710    0.0197
Pt    0.4522    0.6722    0.0712
Pt    0.4476    0.7224    0.0210
Pt    0.4489    0.7212    0.0722
Pt    0.4961    0.6237    0.0686
Pt    0.4267    0.7230    0.0993
Pt    0.2747    0.5450    0.0225
Pt    0.2793    0.5462    0.0743
Pt    0.2739    0.5953    0.0238
Pt    0.2737    0.5968    0.0770
Pt    0.2744    0.6475    0.0233
Pt    0.2741    0.6497    0.0704
Pt    0.2718    0.6965    0.0224
Pt    0.2737    0.7012    0.0724
Pt    0.3982    0.5225    0.1200
Pt    0.4224    0.5455    0.1217
Pt    0.3254    0.5448    0.0227
Pt    0.3261    0.5447    0.0757
Pt    0.3215    0.5971    0.0255
Pt    0.3252    0.5982    0.0740
Pt    0.3224    0.6490    0.0240
Pt    0.3239    0.6483    0.0725
Pt    0.3254    0.6982    0.0198
Pt    0.3251    0.6991    0.0726
Pt    0.3731    0.5489    0.0229
Pt    0.3733    0.5475    0.0697
Pt    0.3698    0.5992    0.0224
Pt    0.3762    0.5988    0.0735
Pt    0.3733    0.6500    0.0213
Pt    0.3757    0.6461    0.0731
Pt    0.3719    0.6969    0.0205
Pt    0.3743    0.7026    0.0729
Pt    0.4217    0.5453    0.0755
Pt    0.4195    0.6013    0.0230
Pt    0.4240    0.5986    0.0707
Pt    0.4249    0.6474    0.0204
Pt    0.4213    0.6488    0.0702
Pt    0.4231    0.6955    0.0202
Pt    0.4284    0.6941    0.0731
Pt    0.4237    0.5956    0.1190
Pt    0.4270    0.5203    0.0991
Pt    0.4757    0.5975    0.0704
Pt    0.4719    0.6445    0.0235
Pt    0.4750    0.6453    0.0673
Pt    0.4719    0.6986    0.0216
Pt    0.4766    0.6954    0.0730
Pt    0.4245    0.7249    0.0491
Pt    0.2746    0.5202    0.0508
Pt    0.2757    0.5166    0.0969
Pt    0.4244    0.6748    0.0993
Pt    0.2741    0.5691    0.0459
Pt    0.2738    0.5710    0.0996
Pt    0.4237    0.6711    0.0471
Pt    0.2742    0.6221    0.0493
Pt    0.2715    0.6250    0.0994
Pt    0.3449    0.5975    0.0004
Pt    0.2713    0.6756    0.0484
Pt    0.2753    0.6758    0.0959
Pt    0.4282    0.6261    0.0946
Pt    0.2736    0.7219    0.0460
Pt    0.2739    0.7256    0.0959
Pt    0.4241    0.6239    0.0473
Pt    0.3255    0.5202    0.0509
Pt    0.3303    0.5199    0.0970
Pt    0.3769    0.6725    0.0975
Pt    0.3227    0.5706    0.0515
Pt    0.3219    0.5718    0.1005
Pt    0.3756    0.6724    0.0470
Pt    0.3193    0.6209    0.0487
Pt    0.3268    0.6248    0.0942
Pt    0.3011    0.5983    0.9987
Pt    0.3257    0.6753    0.0492
Pt    0.3244    0.6732    0.0971
Pt    0.2994    0.6230    0.1200
Pt    0.3229    0.7211    0.0454
Pt    0.3227    0.7239    0.0950
Pt    0.3761    0.5238    0.0462
Pt    0.3729    0.5228    0.0967
Pt    0.2525    0.5705    0.0746
Pt    0.3731    0.5736    0.0477
Pt    0.3754    0.5724    0.0984
Pt    0.3722    0.6219    0.1002
Pt    0.3734    0.6257    0.0446
Pt    0.3000    0.7256    0.1223
Pt    0.2526    0.6751    0.1206
Pt    0.4017    0.6225    0.1229
Pt    0.4001    0.5693    0.1219
Pt    0.2530    0.5965    0.0510
Pt    0.3500    0.6498    0.9986
Pt    0.4733    0.5518    0.1226
Pt    0.3247    0.6485    0.1203
Pt    0.2751    0.5960    0.1216
Pt    0.4467    0.6228    0.1222
Pt    0.4001    0.6759    0.1213
Pt    0.2975    0.5184    0.1217
Pt    0.3733    0.6998    0.1218
Pt    0.4232    0.7467    0.1227
Pt    0.2491    0.5707    0.1226
Pt    0.3944    0.6495    0.9979
Pt    0.3034    0.5464    0.9979
Pt    0.3714    0.6736    0.9980
Pt    0.3711    0.6231    0.9994
Pt    0.3226    0.6228    0.9988
Pt    0.3274    0.5225    0.9996
Pt    0.2734    0.6254    0.9979
Pt    0.3235    0.6713    0.9980
Pt    0.4282    0.4999    0.1249
Pt    0.4745    0.7279    0.1998
Pt    0.4719    0.7242    0.1530
Pt    0.4705    0.6745    0.2011
Pt    0.4737    0.6742    0.1468
Pt    0.4717    0.6275    0.2017
Pt    0.4693    0.6273    0.1506
Pt    0.4774    0.5762    0.2007
Pt    0.4749    0.5761    0.1485
Pt    0.4759    0.5214    0.1968
Pt    0.3729    0.5490    0.1243
Pt    0.4975    0.6033    0.2017
Pt    0.2999    0.5464    0.1483
Pt    0.3001    0.5458    0.1986
Pt    0.2987    0.5986    0.1493
Pt    0.3009    0.5975    0.1982
Pt    0.3032    0.6457    0.1458
Pt    0.2982    0.6460    0.1964
Pt    0.3030    0.6988    0.1477
Pt    0.3009    0.6975    0.1988
Pt    0.2750    0.4985    0.2235
Pt    0.3212    0.5011    0.2226
Pt    0.3511    0.5479    0.1503
Pt    0.3489    0.5455    0.1972
Pt    0.3467    0.5972    0.1488
Pt    0.3539    0.5999    0.1965
Pt    0.3504    0.6481    0.1472
Pt    0.3475    0.6462    0.2009
Pt    0.3497    0.6958    0.1502
Pt    0.3524    0.6986    0.1973
Pt    0.3762    0.7479    0.1737
Pt    0.2506    0.5490    0.2462
Pt    0.3995    0.5469    0.1471
Pt    0.4016    0.5475    0.1979
Pt    0.4001    0.5981    0.1453
Pt    0.4004    0.5947    0.1979
Pt    0.4003    0.6507    0.1475
Pt    0.4030    0.6521    0.2000
Pt    0.3983    0.7026    0.1496
Pt    0.3967    0.7000    0.1988
Pt    0.2486    0.7228    0.2216
Pt    0.2509    0.6748    0.1727
Pt    0.4480    0.5510    0.1456
Pt    0.4555    0.5481    0.1977
Pt    0.4479    0.6017    0.1468
Pt    0.4507    0.5985    0.1977
Pt    0.4486    0.6524    0.1473
Pt    0.4471    0.6497    0.1990
Pt    0.4483    0.7000    0.1515
Pt    0.4492    0.7034    0.2008
Pt    0.2515    0.6513    0.1480
Pt    0.4767    0.5235    0.1481
Pt    0.4216    0.7260    0.2004
Pt    0.4260    0.7256    0.1512
Pt    0.4229    0.6789    0.1992
Pt    0.2504    0.6476    0.1957
Pt    0.4214    0.6774    0.1511
Pt    0.4249    0.6261    0.1988
Pt    0.4236    0.6256    0.1476
Pt    0.4277    0.5708    0.1972
Pt    0.4236    0.5751    0.1491
Pt    0.4277    0.5221    0.1964
Pt    0.4282    0.5206    0.1491
Pt    0.3711    0.7277    0.1989
Pt    0.3743    0.7247    0.1443
Pt    0.4766    0.4983    0.1705
Pt    0.2987    0.5201    0.1749
Pt    0.2948    0.5240    0.2247
Pt    0.3505    0.6727    0.1254
Pt    0.3010    0.5727    0.1714
Pt    0.3033    0.5720    0.2217
Pt    0.2490    0.5474    0.1961
Pt    0.3028    0.6207    0.1709
Pt    0.2995    0.6244    0.2218
Pt    0.2512    0.5712    0.1725
Pt    0.3017    0.6730    0.1724
Pt    0.2986    0.6734    0.2212
Pt    0.4972    0.6480    0.1498
Pt    0.2999    0.7267    0.1702
Pt    0.2990    0.7224    0.2188
Pt    0.2485    0.7005    0.1960
Pt    0.3479    0.5219    0.1705
Pt    0.3505    0.5213    0.2226
Pt    0.3235    0.7218    0.1974
Pt    0.3527    0.5744    0.1731
Pt    0.3491    0.5728    0.2237
Pt    0.3265    0.5473    0.1238
Pt    0.3511    0.6261    0.1738
Pt    0.3516    0.6198    0.2230
Pt    0.4244    0.6533    0.1236
Pt    0.3510    0.6719    0.1744
Pt    0.3499    0.6741    0.2229
Pt    0.3262    0.7272    0.1482
Pt    0.3510    0.7235    0.1721
Pt    0.3473    0.7249    0.2218
Pt    0.2522    0.6989    0.1475
Pt    0.3989    0.5194    0.1731
Pt    0.4023    0.5216    0.2248
Pt    0.2505    0.6203    0.2213
Pt    0.4047    0.5722    0.1709
Pt    0.4019    0.5707    0.2203
Pt    0.3257    0.6732    0.1975
Pt    0.4019    0.6241    0.1744
Pt    0.4014    0.6215    0.2212
Pt    0.2504    0.5198    0.1728
Pt    0.3954    0.6742    0.1749
Pt    0.3980    0.6748    0.2247
Pt    0.3513    0.5201    0.1245
Pt    0.3984    0.7246    0.1744
Pt    0.3958    0.7275    0.2255
Pt    0.4975    0.7259    0.2249
Pt    0.4518    0.5215    0.1724
Pt    0.4549    0.5240    0.2226
Pt    0.4275    0.4997    0.2229
Pt    0.4512    0.5773    0.1719
Pt    0.4501    0.5724    0.2239
Pt    0.3463    0.5002    0.2470
Pt    0.4454    0.6262    0.1733
Pt    0.4456    0.6246    0.2244
Pt    0.2749    0.7235    0.1463
Pt    0.4479    0.6737    0.1729
Pt    0.4484    0.6786    0.2251
Pt    0.3280    0.6717    0.1507
Pt    0.4484    0.7271    0.1779
Pt    0.4497    0.7246    0.2243
Pt    0.2513    0.7244    0.1710
Pt    0.4478    0.6000    0.2459
Pt    0.2758    0.6746    0.1962
Pt    0.3261    0.6224    0.1981
Pt    0.2755    0.5475    0.1715
Pt    0.2750    0.5503    0.2228
Pt    0.2741    0.6746    0.1490
Pt    0.2755    0.5996    0.1694
Pt    0.2784    0.5994    0.2219
Pt    0.3276    0.6249    0.1488
Pt    0.2747    0.6471    0.1727
Pt    0.2733    0.6484    0.2226
Pt    0.3252    0.5732    0.1968
Pt    0.2774    0.6996    0.1705
Pt    0.2765    0.6984    0.2211
Pt    0.4521    0.5238    0.1248
Pt    0.3718    0.6722    0.1999
Pt    0.3743    0.6723    0.1478
Pt    0.3242    0.5728    0.1490
Pt    0.3261    0.5470    0.1735
Pt    0.3240    0.5459    0.2244
Pt    0.2744    0.6213    0.1977
Pt    0.3267    0.5984    0.1740
Pt    0.3255    0.5968    0.2224
Pt    0.2481    0.6759    0.2240
Pt    0.3259    0.6474    0.1734
Pt    0.3242    0.6493    0.2230
Pt    0.3234    0.5230    0.1983
Pt    0.3219    0.7012    0.1743
Pt    0.3254    0.6963    0.2198
Pt    0.4974    0.6729    0.1742
Pt    0.3771    0.6246    0.1960
Pt    0.3776    0.6257    0.1480
Pt    0.3224    0.5212    0.1463
Pt    0.3768    0.5494    0.1761
Pt    0.3728    0.5476    0.2230
Pt    0.2506    0.5973    0.1458
Pt    0.3765    0.6013    0.1705
Pt    0.3752    0.5966    0.2223
Pt    0.2510    0.5223    0.2250
Pt    0.3750    0.6486    0.1749
Pt    0.3766    0.6481    0.2219
Pt    0.4973    0.6042    0.1491
Pt    0.3748    0.7017    0.1736
Pt    0.3733    0.7008    0.2214
Pt    0.2494    0.6241    0.1711
Pt    0.3745    0.5711    0.2013
Pt    0.3781    0.5724    0.1495
Pt    0.2757    0.6252    0.1476
Pt    0.4275    0.5470    0.1734
Pt    0.4294    0.5473    0.2230
Pt    0.4745    0.7477    0.1238
Pt    0.4253    0.5994    0.1739
Pt    0.4261    0.5964    0.2199
Pt    0.2762    0.5733    0.1969
Pt    0.4203    0.6502    0.1725
Pt    0.4238    0.6516    0.2291
Pt    0.2778    0.5708    0.1476
Pt    0.4234    0.7022    0.1741
Pt    0.4213    0.7018    0.2243
Pt    0.3772    0.5212    0.1989
Pt    0.3762    0.5240    0.1488
Pt    0.2753    0.5465    0.1238
Pt    0.4780    0.5500    0.1718
Pt    0.4757    0.5501    0.2240
Pt    0.3004    0.5721    0.1243
Pt    0.4741    0.6019    0.1750
Pt    0.4736    0.5999    0.2218
Pt    0.2739    0.5240    0.1989
Pt    0.4695    0.6480    0.1763
Pt    0.4738    0.6496    0.2252
Pt    0.2763    0.7219    0.1946
Pt    0.4729    0.6979    0.1738
Pt    0.4762    0.6998    0.2244
Pt    0.2728    0.5217    0.1471
Pt    0.3237    0.6253    0.2468
Pt    0.4254    0.6995    0.1247
Pt    0.3989    0.5494    0.2464
Pt    0.3759    0.5725    0.2443
Pt    0.3500    0.4992    0.1967
Pt    0.4533    0.7218    0.1272
Pt    0.4507    0.4990    0.2005
Pt    0.2509    0.6988    0.2476
Pt    0.4494    0.5759    0.1255
Pt    0.3246    0.5992    0.1231
Pt    0.2489    0.5468    0.1490
Pt    0.2484    0.6251    0.1235
Pt    0.3736    0.5999    0.1246
Pt    0.3289    0.6735    0.2473
Pt    0.2991    0.6498    0.2455
Pt    0.3491    0.5733    0.1231
Pt    0.2500    0.5978    0.1981
Pt    0.3993    0.7223    0.1233
Pt    0.2513    0.4989    0.2467
Pt    0.3046    0.6961    0.2448
Pt    0.2749    0.6518    0.1231
Pt    0.2747    0.6765    0.2471
Pt    0.4747    0.6003    0.1241
Pt    0.4490    0.6758    0.1233
Pt    0.3493    0.7220    0.1232
Pt    0.2735    0.7223    0.2472
Pt    0.4974    0.7221    0.1732
Pt    0.3713    0.7266    0.2479
Pt    0.3520    0.5976    0.2466
Pt    0.3532    0.6468    0.2444
Pt    0.3753    0.6770    0.2477
Pt    0.2737    0.6249    0.2459
Pt    0.3213    0.7280    0.2454
Pt    0.3751    0.5253    0.2477
Pt    0.4227    0.7273    0.2471
Pt    0.3992    0.5998    0.2469
Pt    0.4245    0.5782    0.2475
Pt    0.4743    0.6494    0.1235
Pt    0.3781    0.6500    0.1233
Pt    0.3467    0.6218    0.1231
Pt    0.2793    0.6998    0.1229
Pt    0.4742    0.7240    0.3498
Pt    0.4723    0.7255    0.2983
Pt    0.2495    0.7233    0.2734
Pt    0.2479    0.5726    0.2721
Pt    0.3454    0.5005    0.3484
Pt    0.2491    0.6500    0.3494
Pt    0.2513    0.6977    0.2995
Pt    0.3222    0.6250    0.3470
Pt    0.3210    0.6232    0.2987
Pt    0.4752    0.6758    0.3480
Pt    0.3762    0.6229    0.2486
Pt    0.4224    0.5725    0.2992
Pt    0.4710    0.6709    0.2995
Pt    0.3257    0.5728    0.3489
Pt    0.4760    0.4990    0.2737
Pt    0.4713    0.5758    0.2484
Pt    0.2677    0.4990    0.2749
Pt    0.3246    0.5735    0.3023
Pt    0.3253    0.6736    0.2990
Pt    0.2982    0.5497    0.2992
Pt    0.2963    0.5490    0.3493
Pt    0.4228    0.5743    0.3454
Pt    0.2999    0.5966    0.2985
Pt    0.2958    0.6001    0.3502
Pt    0.3480    0.5001    0.3003
Pt    0.2993    0.6484    0.2942
Pt    0.2974    0.6471    0.3503
Pt    0.3712    0.6728    0.3513
Pt    0.3016    0.6968    0.2989
Pt    0.2976    0.7007    0.3505
Pt    0.4259    0.7481    0.3726
Pt    0.2990    0.5002    0.3497
Pt    0.3727    0.6765    0.2975
Pt    0.4219    0.6247    0.2487
Pt    0.3502    0.5486    0.2972
Pt    0.3538    0.5519    0.3481
Pt    0.4237    0.5241    0.3473
Pt    0.3494    0.6004    0.2933
Pt    0.3470    0.5976    0.3481
Pt    0.3754    0.6234    0.3479
Pt    0.3475    0.6438    0.2985
Pt    0.3470    0.6479    0.3482
Pt    0.2977    0.5028    0.2483
Pt    0.3482    0.7016    0.2997
Pt    0.3472    0.6988    0.3493
Pt    0.2491    0.6261    0.3707
Pt    0.3732    0.6241    0.2981
Pt    0.3225    0.5217    0.3493
Pt    0.3738    0.5022    0.2696
Pt    0.3985    0.5463    0.2974
Pt    0.3976    0.5459    0.3474
Pt    0.4724    0.5737    0.3481
Pt    0.3967    0.5984    0.2990
Pt    0.4006    0.6008    0.3516
Pt    0.3728    0.7248    0.2954
Pt    0.3945    0.6514    0.2989
Pt    0.3980    0.6487    0.3471
Pt    0.4789    0.5741    0.2991
Pt    0.3993    0.7015    0.2945
Pt    0.3969    0.6994    0.3478
Pt    0.4739    0.5229    0.3513
Pt    0.4768    0.5244    0.2969
Pt    0.3764    0.5760    0.3493
Pt    0.3720    0.5735    0.3000
Pt    0.4491    0.5510    0.3015
Pt    0.4505    0.5484    0.3487
Pt    0.3232    0.5261    0.2987
Pt    0.4479    0.6012    0.2981
Pt    0.4510    0.5980    0.3480
Pt    0.2504    0.5511    0.3484
Pt    0.4465    0.6452    0.3009
Pt    0.4470    0.6504    0.3495
Pt    0.2714    0.6242    0.3471
Pt    0.4473    0.6989    0.2986
Pt    0.4463    0.6993    0.3479
Pt    0.3744    0.5227    0.3462
Pt    0.4242    0.6271    0.3516
Pt    0.3739    0.5220    0.2959
Pt    0.2749    0.6241    0.2979
Pt    0.3486    0.7472    0.3495
Pt    0.3230    0.7241    0.3493
Pt    0.4747    0.6242    0.3487
Pt    0.3253    0.7262    0.2980
Pt    0.4740    0.6257    0.3008
Pt    0.4207    0.7268    0.3477
Pt    0.2961    0.5246    0.2765
Pt    0.2973    0.5229    0.3218
Pt    0.3007    0.5764    0.2731
Pt    0.2995    0.5738    0.3279
Pt    0.3000    0.6239    0.2712
Pt    0.2969    0.6228    0.3248
Pt    0.3001    0.6740    0.2693
Pt    0.2974    0.6712    0.3232
Pt    0.2981    0.7232    0.2707
Pt    0.2988    0.7235    0.3220
Pt    0.3483    0.5245    0.2731
Pt    0.3465    0.5271    0.3245
Pt    0.3524    0.5738    0.2713
Pt    0.3520    0.5731    0.3247
Pt    0.3499    0.6235    0.2703
Pt    0.3499    0.6201    0.3227
Pt    0.3464    0.6758    0.2722
Pt    0.3487    0.6732    0.3221
Pt    0.3464    0.7276    0.2703
Pt    0.3480    0.7237    0.3271
Pt    0.4014    0.5249    0.2752
Pt    0.3982    0.5249    0.3233
Pt    0.3984    0.5732    0.2750
Pt    0.3988    0.5732    0.3222
Pt    0.3980    0.6260    0.2741
Pt    0.3970    0.6259    0.3234
Pt    0.3995    0.6746    0.2689
Pt    0.3992    0.6754    0.3228
Pt    0.3983    0.7267    0.2724
Pt    0.3940    0.7256    0.3263
Pt    0.4489    0.5264    0.2738
Pt    0.4536    0.5234    0.3232
Pt    0.4457    0.5726    0.2747
Pt    0.4495    0.5746    0.3217
Pt    0.4476    0.6236    0.2744
Pt    0.4468    0.6229    0.3262
Pt    0.4490    0.6746    0.2752
Pt    0.4484    0.6713    0.3251
Pt    0.4499    0.7266    0.2738
Pt    0.4481    0.7233    0.3239
Pt    0.3740    0.7241    0.3509
Pt    0.4227    0.7249    0.3028
Pt    0.2742    0.5522    0.2758
Pt    0.2732    0.5511    0.3219
Pt    0.2737    0.5987    0.2750
Pt    0.2731    0.5994    0.3217
Pt    0.2754    0.6501    0.2707
Pt    0.2734    0.6472    0.3223
Pt    0.2741    0.6989    0.2712
Pt    0.2764    0.7006    0.3224
Pt    0.4208    0.6752    0.3508
Pt    0.4205    0.6231    0.2985
Pt    0.3264    0.5523    0.2740
Pt    0.3197    0.5458    0.3253
Pt    0.3251    0.5989    0.2735
Pt    0.3241    0.5984    0.3242
Pt    0.3254    0.6481    0.2719
Pt    0.3239    0.6490    0.3230
Pt    0.3246    0.7021    0.2731
Pt    0.3221    0.6991    0.3247
Pt    0.2772    0.6739    0.2970
Pt    0.2732    0.7247    0.3502
Pt    0.3744    0.5501    0.2701
Pt    0.3739    0.5493    0.3217
Pt    0.3755    0.5976    0.2726
Pt    0.3739    0.5989    0.3231
Pt    0.3741    0.6517    0.2711
Pt    0.3727    0.6517    0.3248
Pt    0.3726    0.7006    0.2744
Pt    0.3727    0.6998    0.3230
Pt    0.2734    0.6776    0.3461
Pt    0.3227    0.6744    0.3467
Pt    0.4223    0.5499    0.2686
Pt    0.4265    0.5488    0.3257
Pt    0.4230    0.5978    0.2752
Pt    0.4229    0.5973    0.3218
Pt    0.4247    0.6501    0.2743
Pt    0.4199    0.6501    0.3212
Pt    0.4239    0.7020    0.2700
Pt    0.4214    0.7002    0.3258
Pt    0.4250    0.5238    0.3005
Pt    0.2754    0.7222    0.2960
Pt    0.4766    0.5514    0.2737
Pt    0.4769    0.5522    0.3237
Pt    0.4722    0.5962    0.2725
Pt    0.4715    0.5991    0.3226
Pt    0.4743    0.6497    0.2765
Pt    0.4710    0.6465    0.3261
Pt    0.4721    0.7001    0.2775
Pt    0.4716    0.6983    0.3255
Pt    0.4252    0.6772    0.2985
Pt    0.2723    0.5209    0.3004
Pt    0.2722    0.5257    0.3447
Pt    0.4520    0.5027    0.2506
Pt    0.2754    0.5747    0.2993
Pt    0.2722    0.5753    0.3494
Pt    0.3487    0.5490    0.2489
Pt    0.3206    0.5250    0.2524
Pt    0.4254    0.5015    0.2746
Pt    0.4524    0.5493    0.2506
Pt    0.2486    0.5019    0.3492
Pt    0.4745    0.5495    0.3713
Pt    0.4770    0.5251    0.2480
Pt    0.3212    0.4993    0.2753
Pt    0.2498    0.6776    0.3712
Pt    0.4278    0.6784    0.2486
Pt    0.4466    0.4988    0.2978
Pt    0.3242    0.5747    0.2496
Pt    0.4488    0.5001    0.3483
Pt    0.2506    0.6719    0.3226
Pt    0.2967    0.5489    0.2521
Pt    0.3736    0.6987    0.3717
Pt    0.2488    0.6720    0.2726
Pt    0.3998    0.4987    0.2981
Pt    0.4970    0.5514    0.2494
Pt    0.4964    0.6486    0.2524
Pt    0.4477    0.7460    0.2997
Pt    0.2767    0.7470    0.3229
Pt    0.2964    0.6243    0.3725
Pt    0.3984    0.7017    0.2498
Pt    0.4971    0.6765    0.3236
Pt    0.4758    0.7227    0.2510
Pt    0.2731    0.5257    0.2518
Pt    0.2985    0.7477    0.3530
Pt    0.3980    0.6477    0.2484
Pt    0.2514    0.6464    0.2957
Pt    0.4504    0.7020    0.2504
Pt    0.2718    0.4989    0.3716
Pt    0.3242    0.6476    0.3727
Pt    0.4256    0.5998    0.3711
Pt    0.4737    0.6762    0.2502
Pt    0.3493    0.6237    0.3697
Pt    0.2490    0.6254    0.2707
Pt    0.2481    0.5480    0.2988
Pt    0.3766    0.5476    0.3710
Pt    0.2989    0.7442    0.2972
Pt    0.3509    0.5255    0.3705
Pt    0.4232    0.5506    0.3724
Pt    0.4723    0.6238    0.2509
Pt    0.2972    0.5716    0.3724
Pt    0.3221    0.5954    0.3714
Pt    0.4473    0.5739    0.3724
Pt    0.2498    0.7002    0.3478
Pt    0.3222    0.6974    0.3722
Pt    0.4228    0.6984    0.3722
Pt    0.4953    0.7219    0.3727
Pt    0.4512    0.6772    0.3723
Pt    0.4273    0.5235    0.2488
Pt    0.3474    0.6998    0.2484
Pt    0.2726    0.5736    0.2482
Pt    0.3005    0.6000    0.2481
Pt    0.2488    0.6009    0.2488
Pt    0.4491    0.6527    0.2483
Pt    0.4741    0.7239    0.4482
Pt    0.4726    0.7258    0.3988
Pt    0.4745    0.6763    0.4488
Pt    0.4723    0.6756    0.4006
Pt    0.3993    0.4994    0.4499
Pt    0.4717    0.6256    0.4475
Pt    0.3234    0.4988    0.4223
Pt    0.4515    0.6275    0.3734
Pt    0.2479    0.5000    0.4529
Pt    0.3005    0.7476    0.4492
Pt    0.4736    0.5029    0.4715
Pt    0.4966    0.6744    0.3736
Pt    0.2979    0.5494    0.3998
Pt    0.3004    0.5494    0.4499
Pt    0.2968    0.6001    0.3966
Pt    0.2975    0.5968    0.4473
Pt    0.2999    0.6467    0.3972
Pt    0.2960    0.6493    0.4479
Pt    0.2973    0.6984    0.3969
Pt    0.2968    0.7022    0.4478
Pt    0.3498    0.5014    0.4475
Pt    0.4968    0.7267    0.4730
Pt    0.3509    0.5526    0.3974
Pt    0.3481    0.5498    0.4479
Pt    0.3457    0.6005    0.3964
Pt    0.3473    0.6006    0.4465
Pt    0.3478    0.6526    0.4003
Pt    0.3465    0.6507    0.4533
Pt    0.3483    0.6999    0.4016
Pt    0.3479    0.6988    0.4509
Pt    0.2706    0.5735    0.3991
Pt    0.2481    0.6258    0.4200
Pt    0.3963    0.5501    0.3966
Pt    0.4013    0.5501    0.4467
Pt    0.4004    0.5997    0.3975
Pt    0.3982    0.6011    0.4496
Pt    0.3984    0.6500    0.3979
Pt    0.3985    0.6518    0.4498
Pt    0.3970    0.7011    0.3981
Pt    0.3952    0.6998    0.4463
Pt    0.4225    0.5220    0.3988
Pt    0.2726    0.5240    0.4493
Pt    0.4477    0.5500    0.3942
Pt    0.4485    0.5495    0.4461
Pt    0.4529    0.5986    0.4010
Pt    0.4467    0.6011    0.4471
Pt    0.4475    0.6506    0.3987
Pt    0.4485    0.6511    0.4463
Pt    0.4476    0.7030    0.3982
Pt    0.4493    0.6998    0.4492
Pt    0.4743    0.6262    0.3972
Pt    0.4714    0.5757    0.4481
Pt    0.4747    0.5726    0.3961
Pt    0.2712    0.5210    0.3983
Pt    0.4760    0.5251    0.4463
Pt    0.4737    0.5242    0.3961
Pt    0.3717    0.7281    0.4521
Pt    0.4730    0.6992    0.4736
Pt    0.4207    0.7266    0.4511
Pt    0.4462    0.4984    0.3978
Pt    0.4735    0.7009    0.4239
Pt    0.4227    0.6781    0.4535
Pt    0.3717    0.7245    0.3956
Pt    0.3711    0.6738    0.4480
Pt    0.2725    0.7462    0.3757
Pt    0.4729    0.6478    0.4703
Pt    0.2967    0.5256    0.4230
Pt    0.2971    0.5252    0.4735
Pt    0.4741    0.6516    0.4239
Pt    0.2988    0.5742    0.4224
Pt    0.2983    0.5713    0.4754
Pt    0.3732    0.6745    0.3992
Pt    0.3004    0.6231    0.4226
Pt    0.2975    0.6252    0.4751
Pt    0.4194    0.7244    0.4001
Pt    0.2961    0.6759    0.4225
Pt    0.2969    0.6730    0.4709
Pt    0.3257    0.5000    0.3736
Pt    0.2989    0.7258    0.4242
Pt    0.2979    0.7243    0.4743
Pt    0.4220    0.6519    0.4239
Pt    0.3478    0.5244    0.4203
Pt    0.3462    0.5240    0.4728
Pt    0.3256    0.5257    0.4458
Pt    0.3498    0.5748    0.4231
Pt    0.3442    0.5774    0.4741
Pt    0.3713    0.6252    0.4501
Pt    0.3475    0.6263    0.4248
Pt    0.3456    0.6237    0.4716
Pt    0.4723    0.6010    0.4726
Pt    0.3479    0.6769    0.4245
Pt    0.3471    0.6773    0.4763
Pt    0.4723    0.6045    0.4249
Pt    0.3468    0.7252    0.4254
Pt    0.3480    0.7249    0.4754
Pt    0.3216    0.5020    0.4715
Pt    0.3943    0.5247    0.4196
Pt    0.4009    0.5227    0.4736
Pt    0.2705    0.6728    0.4480
Pt    0.3960    0.5764    0.4247
Pt    0.3992    0.5766    0.4759
Pt    0.4733    0.5472    0.4730
Pt    0.4012    0.6250    0.4254
Pt    0.3985    0.6261    0.4705
Pt    0.4745    0.5493    0.4224
Pt    0.3976    0.6758    0.4239
Pt    0.3953    0.6762    0.4719
Pt    0.3725    0.6247    0.4020
Pt    0.3944    0.7266    0.4232
Pt    0.3966    0.7259    0.4747
Pt    0.4240    0.6015    0.4732
Pt    0.4490    0.5251    0.4222
Pt    0.4473    0.5236    0.4712
Pt    0.4246    0.6769    0.3981
Pt    0.4488    0.5764    0.4241
Pt    0.4487    0.5719    0.4735
Pt    0.2757    0.7227    0.4026
Pt    0.4478    0.6269    0.4214
Pt    0.4470    0.6248    0.4759
Pt    0.3734    0.5734    0.4496
Pt    0.4481    0.6739    0.4231
Pt    0.4482    0.6740    0.4715
Pt    0.2720    0.6737    0.4013
Pt    0.4468    0.7239    0.4235
Pt    0.4483    0.7258    0.4721
Pt    0.2727    0.7280    0.4485
Pt    0.4245    0.6267    0.4498
Pt    0.3724    0.5757    0.3971
Pt    0.4216    0.5254    0.4486
Pt    0.2693    0.5445    0.4243
Pt    0.2739    0.5496    0.4718
Pt    0.3733    0.5279    0.4519
Pt    0.2734    0.6000    0.4205
Pt    0.2761    0.5964    0.4718
Pt    0.3729    0.5245    0.3942
Pt    0.2724    0.6485    0.4233
Pt    0.2702    0.6494    0.4725
Pt    0.4201    0.5987    0.4240
Pt    0.2737    0.7014    0.4250
Pt    0.2723    0.6982    0.4734
Pt    0.4224    0.6246    0.3958
Pt    0.2739    0.6226    0.4490
Pt    0.2726    0.6256    0.3977
Pt    0.2711    0.5730    0.4459
Pt    0.3246    0.5506    0.4191
Pt    0.3232    0.5473    0.4739
Pt    0.3262    0.7261    0.4491
Pt    0.3242    0.6014    0.4212
Pt    0.3204    0.5996    0.4746
Pt    0.3242    0.7220    0.3978
Pt    0.3201    0.6506    0.4231
Pt    0.3228    0.6489    0.4796
Pt    0.3224    0.6740    0.4502
Pt    0.3220    0.6981    0.4253
Pt    0.3218    0.6950    0.4742
Pt    0.4223    0.7050    0.4733
Pt    0.4238    0.5764    0.4488
Pt    0.4239    0.6991    0.4260
Pt    0.2495    0.7241    0.4238
Pt    0.3726    0.5497    0.4236
Pt    0.3685    0.5530    0.4735
Pt    0.3227    0.6746    0.3985
Pt    0.3764    0.6022    0.4245
Pt    0.3728    0.6000    0.4745
Pt    0.3266    0.5242    0.3956
Pt    0.3728    0.6500    0.4232
Pt    0.3697    0.6502    0.4757
Pt    0.3198    0.6269    0.4483
Pt    0.3729    0.7021    0.4232
Pt    0.3698    0.7002    0.4747
Pt    0.3268    0.6263    0.3984
Pt    0.4216    0.6516    0.4741
Pt    0.3233    0.5756    0.4453
Pt    0.3231    0.5751    0.3990
Pt    0.4255    0.5490    0.4197
Pt    0.4206    0.5473    0.4742
Pt    0.4267    0.5748    0.3988
Pt    0.3990    0.6759    0.3754
Pt    0.2981    0.5012    0.3988
Pt    0.3755    0.4993    0.3740
Pt    0.4485    0.5005    0.4966
Pt    0.2963    0.5008    0.4495
Pt    0.2720    0.6508    0.3748
Pt    0.2712    0.7021    0.3737
Pt    0.2722    0.4989    0.4776
Pt    0.2479    0.7214    0.4733
Pt    0.3235    0.5498    0.3749
Pt    0.2976    0.7234    0.3794
Pt    0.3746    0.6022    0.3762
Pt    0.4699    0.4984    0.4208
Pt    0.2988    0.5234    0.3762
Pt    0.2707    0.7478    0.4732
Pt    0.4185    0.6287    0.4972
Pt    0.3722    0.6478    0.3745
Pt    0.3490    0.6751    0.3756
Pt    0.4954    0.5997    0.4974
Pt    0.4739    0.6507    0.3754
Pt    0.4223    0.7480    0.4263
Pt    0.2487    0.5987    0.4457
Pt    0.2720    0.5984    0.3751
Pt    0.2487    0.6212    0.4723
Pt    0.4973    0.6253    0.4230
Pt    0.2945    0.6754    0.3755
Pt    0.3991    0.7248    0.3744
Pt    0.3525    0.5731    0.3737
Pt    0.4977    0.5994    0.4488
Pt    0.4971    0.6749    0.4733
Pt    0.4970    0.5761    0.4214
Pt    0.2732    0.5496    0.3748
Pt    0.4962    0.6248    0.4754
Pt    0.4960    0.6003    0.3986
Pt    0.3733    0.5255    0.4960
Pt    0.3999    0.4987    0.4975
Pt    0.2494    0.5758    0.4720
Pt    0.4465    0.5237    0.3730
Pt    0.4735    0.5974    0.3745
Pt    0.4001    0.5231    0.3749
Pt    0.4515    0.5002    0.4483
Pt    0.3988    0.6266    0.3737
Pt    0.4972    0.5731    0.4731
Pt    0.2479    0.5256    0.3755
Pt    0.4711    0.5730    0.4964
Pt    0.4016    0.5761    0.3737
Pt    0.4232    0.6525    0.3757
Pt    0.4490    0.6501    0.4968
Pt    0.4752    0.7263    0.4977
Pt    0.2491    0.5535    0.4962
Pt    0.3479    0.4999    0.4960
Pt    0.3969    0.5502    0.4967
Pt    0.4458    0.5478    0.4966
Pt    0.3954    0.6507    0.4962
Pt    0.4960    0.6506    0.4965
Pt    0.2717    0.6748    0.4964
Pt    0.4493    0.7006    0.4958
Pt    0.4974    0.5241    0.4711
Pt    0.2478    0.7481    0.4002
Pt    0.3746    0.6250    0.4976
Pt    0.4471    0.7222    0.3732
Pt    0.4749    0.6988    0.3736
Pt    0.3480    0.7209    0.3729
Pt    0.4707    0.7207    0.5972
Pt    0.4741    0.7262    0.5461
Pt    0.3944    0.5004    0.5478
Pt    0.4719    0.6726    0.5954
Pt    0.4742    0.6730    0.5476
Pt    0.4968    0.7009    0.4983
Pt    0.3730    0.4993    0.5732
Pt    0.4256    0.7248    0.4986
Pt    0.3472    0.7011    0.5011
Pt    0.4703    0.6225    0.5954
Pt    0.4734    0.6173    0.5474
Pt    0.2480    0.5741    0.6207
Pt    0.2489    0.5222    0.5755
Pt    0.3214    0.5016    0.5226
Pt    0.3728    0.5022    0.5246
Pt    0.2737    0.4993    0.5214
Pt    0.4451    0.4992    0.6005
Pt    0.4219    0.4990    0.5756
Pt    0.2959    0.5466    0.5484
Pt    0.2968    0.5469    0.5998
Pt    0.2747    0.5735    0.4994
Pt    0.2984    0.6007    0.5489
Pt    0.2960    0.6000    0.5969
Pt    0.3225    0.6269    0.5021
Pt    0.2992    0.6475    0.5532
Pt    0.2962    0.6503    0.6016
Pt    0.2951    0.5018    0.5500
Pt    0.2965    0.7000    0.5510
Pt    0.2952    0.6998    0.5989
Pt    0.3713    0.7472    0.5733
Pt    0.3478    0.5968    0.4990
Pt    0.3225    0.7245    0.4983
Pt    0.4216    0.5212    0.5457
Pt    0.3446    0.5494    0.5510
Pt    0.3434    0.5494    0.5991
Pt    0.3716    0.7248    0.5956
Pt    0.3466    0.5995    0.5472
Pt    0.3452    0.5981    0.5993
Pt    0.3739    0.7241    0.5495
Pt    0.3489    0.6458    0.5487
Pt    0.3427    0.6496    0.6008
Pt    0.3221    0.5746    0.4992
Pt    0.3486    0.6987    0.5488
Pt    0.3443    0.6995    0.5992
Pt    0.4241    0.7253    0.5972
Pt    0.4255    0.7227    0.5488
Pt    0.3700    0.6737    0.5966
Pt    0.3733    0.6725    0.5476
Pt    0.3941    0.5493    0.5512
Pt    0.3969    0.5465    0.5982
Pt    0.3684    0.6268    0.6015
Pt    0.3967    0.5986    0.5504
Pt    0.3977    0.5995    0.5982
Pt    0.3715    0.6239    0.5483
Pt    0.3995    0.6465    0.5493
Pt    0.3960    0.6462    0.5952
Pt    0.3715    0.5722    0.5975
Pt    0.3985    0.6978    0.5445
Pt    0.3985    0.6985    0.5985
Pt    0.3703    0.5765    0.5503
Pt    0.4241    0.5730    0.4990
Pt    0.4212    0.6729    0.5946
Pt    0.3732    0.5228    0.5967
Pt    0.4451    0.5468    0.5481
Pt    0.4475    0.5495    0.5991
Pt    0.3707    0.5237    0.5499
Pt    0.4481    0.5950    0.5489
Pt    0.4486    0.5936    0.5952
Pt    0.3205    0.7251    0.6012
Pt    0.4470    0.6478    0.5483
Pt    0.4467    0.6473    0.5980
Pt    0.3215    0.7270    0.5472
Pt    0.4467    0.6996    0.5489
Pt    0.4463    0.6978    0.5960
Pt    0.4737    0.5687    0.5980
Pt    0.4715    0.5731    0.5520
Pt    0.3455    0.5017    0.5452
Pt    0.4458    0.4999    0.5476
Pt    0.4724    0.5232    0.5972
Pt    0.4208    0.7467    0.5718
Pt    0.4718    0.5260    0.5474
Pt    0.4969    0.6995    0.5973
Pt    0.2502    0.5999    0.4981
Pt    0.3980    0.5990    0.5008
Pt    0.2933    0.5253    0.5217
Pt    0.2952    0.5247    0.5736
Pt    0.2958    0.5749    0.5260
Pt    0.2978    0.5730    0.5723
Pt    0.2965    0.6240    0.5245
Pt    0.2961    0.6241    0.5744
Pt    0.2956    0.6776    0.5246
Pt    0.2987    0.6759    0.5765
Pt    0.2935    0.7199    0.5249
Pt    0.2987    0.7252    0.5753
Pt    0.3463    0.5235    0.5227
Pt    0.3477    0.5238    0.5774
Pt    0.3485    0.5726    0.5255
Pt    0.3463    0.5757    0.5732
Pt    0.3471    0.6239    0.5224
Pt    0.3454    0.6232    0.5744
Pt    0.3481    0.6748    0.5295
Pt    0.3453    0.6746    0.5747
Pt    0.3476    0.7278    0.5240
Pt    0.3444    0.7263    0.5741
Pt    0.3959    0.5266    0.5221
Pt    0.3982    0.5230    0.5710
Pt    0.3993    0.5729    0.5238
Pt    0.3954    0.5735    0.5749
Pt    0.3968    0.6207    0.5259
Pt    0.3951    0.6234    0.5751
Pt    0.3945    0.6713    0.5228
Pt    0.3967    0.6719    0.5702
Pt    0.3995    0.7243    0.5231
Pt    0.3999    0.7219    0.5721
Pt    0.4474    0.5249    0.5239
Pt    0.4491    0.5229    0.5740
Pt    0.4484    0.5699    0.5237
Pt    0.4436    0.5720    0.5715
Pt    0.4465    0.6247    0.5208
Pt    0.4459    0.6202    0.5748
Pt    0.4492    0.6749    0.5246
Pt    0.4489    0.6724    0.5685
Pt    0.4500    0.7266    0.5234
Pt    0.4490    0.7238    0.5724
Pt    0.4214    0.6729    0.5477
Pt    0.3231    0.6746    0.6010
Pt    0.2665    0.5519    0.5239
Pt    0.2709    0.5495    0.5723
Pt    0.2738    0.5986    0.5257
Pt    0.2721    0.5989    0.5734
Pt    0.2730    0.6481    0.5243
Pt    0.2721    0.6497    0.5756
Pt    0.2665    0.6999    0.5249
Pt    0.2705    0.6986    0.5743
Pt    0.4203    0.6237    0.5998
Pt    0.4238    0.6235    0.5468
Pt    0.3217    0.5489    0.5261
Pt    0.3200    0.5461    0.5742
Pt    0.3221    0.5987    0.5247
Pt    0.3229    0.5988    0.5743
Pt    0.3191    0.6514    0.5237
Pt    0.3203    0.6485    0.5761
Pt    0.3239    0.6997    0.5269
Pt    0.3240    0.7026    0.5735
Pt    0.3214    0.6724    0.5505
Pt    0.4200    0.5717    0.5992
Pt    0.3725    0.5484    0.5234
Pt    0.3695    0.5484    0.5749
Pt    0.3718    0.5986    0.5233
Pt    0.3711    0.6009    0.5736
Pt    0.3749    0.6456    0.5254
Pt    0.3698    0.6489    0.5743
Pt    0.3729    0.7011    0.5228
Pt    0.3754    0.6983    0.5726
Pt    0.4189    0.5734    0.5493
Pt    0.2964    0.7478    0.4994
Pt    0.4213    0.5468    0.5234
Pt    0.4227    0.5455    0.5731
Pt    0.4255    0.5975    0.5251
Pt    0.4225    0.6007    0.5729
Pt    0.4211    0.6501    0.5235
Pt    0.4252    0.6491    0.5732
Pt    0.4254    0.6991    0.5262
Pt    0.4213    0.6980    0.5705
Pt    0.2980    0.5475    0.4979
Pt    0.4228    0.5226    0.5990
Pt    0.4752    0.5514    0.5218
Pt    0.4716    0.5480    0.5730
Pt    0.4743    0.5943    0.5238
Pt    0.4730    0.5979    0.5767
Pt    0.4695    0.6503    0.5220
Pt    0.4747    0.6470    0.5708
Pt    0.4738    0.7012    0.5217
Pt    0.4727    0.6976    0.5730
Pt    0.3200    0.6226    0.5971
Pt    0.2667    0.5233    0.5495
Pt    0.2722    0.5202    0.6001
Pt    0.3243    0.6268    0.5483
Pt    0.2724    0.5742    0.5497
Pt    0.2715    0.5744    0.5982
Pt    0.2722    0.5263    0.4985
Pt    0.2717    0.6263    0.5507
Pt    0.2709    0.6227    0.5980
Pt    0.2481    0.6233    0.5750
Pt    0.2709    0.6733    0.5496
Pt    0.2714    0.6775    0.5993
Pt    0.4957    0.7230    0.5712
Pt    0.2719    0.7235    0.5510
Pt    0.2727    0.7243    0.5974
Pt    0.3198    0.5726    0.5953
Pt    0.3216    0.5213    0.5513
Pt    0.3185    0.5229    0.5997
Pt    0.3230    0.5733    0.5457
Pt    0.2694    0.7224    0.5007
Pt    0.2478    0.7460    0.5503
Pt    0.2481    0.7233    0.5801
Pt    0.4728    0.7471    0.5725
Pt    0.3738    0.7240    0.5001
Pt    0.4960    0.5471    0.5916
Pt    0.2535    0.6478    0.6017
Pt    0.4975    0.7270    0.5220
Pt    0.4486    0.5988    0.4997
Pt    0.4225    0.5228    0.4989
Pt    0.2951    0.7480    0.5501
Pt    0.2478    0.5993    0.5495
Pt    0.4490    0.7451    0.5970
Pt    0.4962    0.6000    0.5986
Pt    0.4719    0.6265    0.4988
Pt    0.4008    0.6989    0.5007
Pt    0.4974    0.6729    0.5241
Pt    0.3224    0.6769    0.5012
Pt    0.4939    0.6462    0.5449
Pt    0.2732    0.6239    0.4990
Pt    0.2954    0.6976    0.4983
Pt    0.4966    0.6471    0.5971
Pt    0.4457    0.6737    0.6173
Pt    0.3712    0.6745    0.4997
Pt    0.4262    0.6773    0.4985
Pt    0.2478    0.5219    0.5233
Pt    0.4464    0.6192    0.6191
Pt    0.3208    0.5265    0.5006
Pt    0.3476    0.5264    0.6212
Pt    0.4726    0.5247    0.4997
Pt    0.3731    0.5732    0.4996
Pt    0.3466    0.5502    0.5007
Pt    0.3484    0.6507    0.5030
Pt    0.3713    0.6977    0.6218
Pt    0.3731    0.6489    0.6228
Pt    0.4956    0.4995    0.5993
Pt    0.4702    0.6485    0.6202
Pt    0.4735    0.6743    0.4985
Pt    0.2999    0.5993    0.5013
Pt    0.4486    0.5260    0.6217
Pt    0.3985    0.6713    0.6208
Pt    0.3975    0.7249    0.6211
Pt    0.4701    0.5958    0.6210
Pt    0.3751    0.5996    0.6220
Pt    0.2716    0.5964    0.6225
Pt    0.3953    0.5732    0.6208
Pt    0.3977    0.5245    0.6212
Pt    0.4215    0.6960    0.6211
Pt    0.3218    0.5511    0.6226
Pt    0.4949    0.6240    0.6220
Pt    0.3213    0.6994    0.6226
Pt    0.3500    0.5770    0.6216
Pt    0.3459    0.7225    0.6219
Pt    0.2926    0.6502    0.4984
Pt    0.4703    0.7232    0.7005
Pt    0.3504    0.5984    0.7468
Pt    0.4741    0.7238    0.6498
Pt    0.3701    0.5007    0.7256
Pt    0.4951    0.5211    0.7263
Pt    0.4971    0.7237    0.6236
Pt    0.2485    0.5998    0.6502
Pt    0.2981    0.5496    0.6463
Pt    0.2948    0.5501    0.6994
Pt    0.2957    0.6004    0.6498
Pt    0.2948    0.6000    0.7022
Pt    0.2972    0.6503    0.6553
Pt    0.3029    0.6998    0.6475
Pt    0.3212    0.4987    0.7203
Pt    0.3483    0.6746    0.6267
Pt    0.3458    0.5489    0.6471
Pt    0.3463    0.5467    0.6982
Pt    0.3450    0.6002    0.6506
Pt    0.3448    0.5997    0.6979
Pt    0.3462    0.6479    0.6524
Pt    0.3468    0.6480    0.6992
Pt    0.3512    0.6974    0.6483
Pt    0.3474    0.6994    0.6962
Pt    0.4497    0.7480    0.6498
Pt    0.4717    0.6223    0.6448
Pt    0.3963    0.5466    0.6498
Pt    0.3960    0.5497    0.6991
Pt    0.3964    0.5997    0.6480
Pt    0.3951    0.5961    0.6984
Pt    0.3993    0.6475    0.6493
Pt    0.3936    0.6506    0.6987
Pt    0.3967    0.6990    0.6466
Pt    0.3964    0.7012    0.7018
Pt    0.4702    0.5722    0.6999
Pt    0.4706    0.5736    0.6506
Pt    0.4465    0.5478    0.6470
Pt    0.4460    0.5487    0.6986
Pt    0.4458    0.5984    0.6485
Pt    0.4477    0.5989    0.7013
Pt    0.4491    0.6487    0.6475
Pt    0.4437    0.6491    0.6975
Pt    0.4507    0.6986    0.6532
Pt    0.4485    0.6987    0.6994
Pt    0.4703    0.6721    0.7000
Pt    0.2499    0.5725    0.6730
Pt    0.3706    0.4990    0.6733
Pt    0.3979    0.5012    0.6507
Pt    0.4732    0.6744    0.6520
Pt    0.3711    0.5716    0.7478
Pt    0.3716    0.7464    0.6732
Pt    0.4716    0.6209    0.7006
Pt    0.3446    0.6257    0.6254
Pt    0.2989    0.5231    0.6715
Pt    0.2951    0.5224    0.7211
Pt    0.4696    0.5014    0.6745
Pt    0.2945    0.5744    0.6702
Pt    0.2962    0.5730    0.7238
Pt    0.4225    0.6472    0.6254
Pt    0.2972    0.6206    0.6770
Pt    0.4925    0.5249    0.6232
Pt    0.4970    0.5990    0.6963
Pt    0.2969    0.5208    0.6278
Pt    0.4209    0.6246    0.7470
Pt    0.4960    0.6968    0.6470
Pt    0.3469    0.5244    0.6714
Pt    0.3443    0.5237    0.7237
Pt    0.4234    0.5725    0.6972
Pt    0.3469    0.5720    0.6742
Pt    0.3484    0.5724    0.7215
Pt    0.4202    0.5740    0.6494
Pt    0.3436    0.6224    0.6739
Pt    0.3522    0.6231    0.7209
Pt    0.4221    0.5184    0.6971
Pt    0.3491    0.6745    0.6714
Pt    0.4252    0.5221    0.6475
Pt    0.3495    0.7229    0.6706
Pt    0.4216    0.5720    0.7469
Pt    0.3937    0.5226    0.6777
Pt    0.3960    0.5238    0.7261
Pt    0.3720    0.7237    0.6987
Pt    0.3963    0.5725    0.6718
Pt    0.3985    0.5737    0.7209
Pt    0.3734    0.7233    0.6466
Pt    0.3969    0.6230    0.6721
Pt    0.3959    0.6222    0.7247
Pt    0.3724    0.6776    0.6969
Pt    0.3988    0.6767    0.6739
Pt    0.3943    0.6758    0.7250
Pt    0.3745    0.6728    0.6488
Pt    0.3985    0.7221    0.6728
Pt    0.3977    0.7284    0.7265
Pt    0.4222    0.5007    0.6251
Pt    0.4462    0.5243    0.6734
Pt    0.4459    0.5192    0.7200
Pt    0.2751    0.6497    0.6285
Pt    0.4472    0.5718    0.6751
Pt    0.4495    0.5726    0.7261
Pt    0.3724    0.6223    0.6944
Pt    0.4476    0.6239    0.6762
Pt    0.4470    0.6241    0.7233
Pt    0.3703    0.6232    0.6462
Pt    0.4472    0.6740    0.6757
Pt    0.4465    0.6745    0.7231
Pt    0.3713    0.5703    0.6977
Pt    0.4495    0.7235    0.6756
Pt    0.4469    0.7241    0.7285
Pt    0.4192    0.4995    0.7225
Pt    0.3208    0.4999    0.6278
Pt    0.2694    0.5021    0.7224
Pt    0.3715    0.5726    0.6474
Pt    0.2723    0.5461    0.6731
Pt    0.2718    0.5522    0.7260
Pt    0.3685    0.5212    0.6993
Pt    0.2704    0.5991    0.6757
Pt    0.3711    0.5235    0.6458
Pt    0.4723    0.5259    0.6954
Pt    0.3971    0.7480    0.6966
Pt    0.2959    0.4995    0.6965
Pt    0.3984    0.7483    0.6475
Pt    0.3210    0.5498    0.6735
Pt    0.3192    0.5472    0.7240
Pt    0.4950    0.5739    0.6727
Pt    0.3196    0.5955    0.6757
Pt    0.3259    0.5973    0.7274
Pt    0.3241    0.7249    0.6488
Pt    0.3196    0.6473    0.6805
Pt    0.3274    0.6736    0.6958
Pt    0.3234    0.6954    0.6726
Pt    0.4703    0.5238    0.6487
Pt    0.4237    0.7257    0.7026
Pt    0.4966    0.7235    0.7227
Pt    0.3212    0.6727    0.6496
Pt    0.3713    0.5489    0.6740
Pt    0.3717    0.5463    0.7230
Pt    0.3211    0.6189    0.7016
Pt    0.3685    0.5990    0.6721
Pt    0.3730    0.5963    0.7210
Pt    0.3202    0.6238    0.6488
Pt    0.3709    0.6473    0.6731
Pt    0.3733    0.6482    0.7284
Pt    0.3228    0.5737    0.6986
Pt    0.3725    0.6974    0.6734
Pt    0.4220    0.7226    0.6469
Pt    0.4205    0.6753    0.7001
Pt    0.2941    0.7229    0.6267
Pt    0.2984    0.5766    0.6248
Pt    0.4193    0.5475    0.6732
Pt    0.4199    0.5458    0.7245
Pt    0.3225    0.5754    0.6504
Pt    0.4213    0.5979    0.6745
Pt    0.4230    0.5981    0.7217
Pt    0.3215    0.5234    0.6944
Pt    0.4204    0.6508    0.6720
Pt    0.4213    0.6508    0.7229
Pt    0.3226    0.5251    0.6497
Pt    0.4217    0.7003    0.6780
Pt    0.4206    0.6996    0.7280
Pt    0.4252    0.6755    0.6479
Pt    0.4208    0.6251    0.6968
Pt    0.4242    0.6222    0.6491
Pt    0.4969    0.6698    0.6742
Pt    0.4711    0.5487    0.6719
Pt    0.4721    0.5464    0.7237
Pt    0.4464    0.7210    0.6262
Pt    0.4709    0.5981    0.6731
Pt    0.4708    0.5998    0.7243
Pt    0.2732    0.6233    0.6488
Pt    0.4706    0.6473    0.6750
Pt    0.4711    0.6459    0.7234
Pt    0.2716    0.5729    0.6987
Pt    0.4730    0.6967    0.6774
Pt    0.4746    0.6985    0.7237
Pt    0.2703    0.5209    0.6472
Pt    0.2687    0.5233    0.7002
Pt    0.2698    0.5735    0.6483
Pt    0.2972    0.6735    0.6254
Pt    0.4457    0.5474    0.7452
Pt    0.4205    0.5493    0.6243
Pt    0.4963    0.6261    0.6736
Pt    0.4724    0.5494    0.6259
Pt    0.4962    0.5253    0.6715
Pt    0.4962    0.5766    0.7238
Pt    0.3973    0.6246    0.6241
Pt    0.4193    0.5998    0.6240
Pt    0.3220    0.5979    0.6254
Pt    0.3197    0.6476    0.6271
Pt    0.4940    0.7227    0.6722
Pt    0.2492    0.6249    0.6253
Pt    0.4973    0.6497    0.6473
Pt    0.2739    0.5465    0.6257
Pt    0.2701    0.5026    0.6750
Pt    0.4443    0.5730    0.6231
Pt    0.4245    0.7469    0.7303
Pt    0.4008    0.5963    0.7469
Pt    0.2720    0.5249    0.7477
Pt    0.3249    0.5727    0.7467
Pt    0.4727    0.7019    0.6230
Pt    0.3710    0.5478    0.6230
Pt    0.2955    0.6245    0.6236
Pt    0.4484    0.7428    0.7568
Pt    0.3203    0.5738    0.8454
Pt    0.3207    0.5716    0.7993
Pt    0.2721    0.4991    0.7754
Pt    0.2481    0.5514    0.7482
Pt    0.3197    0.5255    0.8455
Pt    0.4675    0.7197    0.8508
Pt    0.4709    0.7185    0.8011
Pt    0.4944    0.6219    0.8210
Pt    0.2720    0.5727    0.8005
Pt    0.2966    0.4983    0.7484
Pt    0.3726    0.5257    0.8479
Pt    0.3005    0.5507    0.7515
Pt    0.2955    0.5454    0.7991
Pt    0.2974    0.5509    0.8451
Pt    0.2928    0.5907    0.8487
Pt    0.4239    0.4989    0.8245
Pt    0.3991    0.6465    0.7509
Pt    0.4727    0.5181    0.7504
Pt    0.2499    0.6231    0.8277
Pt    0.3481    0.5520    0.8008
Pt    0.3461    0.5466    0.8514
Pt    0.3711    0.4992    0.7742
Pt    0.2682    0.5219    0.8466
Pt    0.4228    0.7195    0.7543
Pt    0.4248    0.5227    0.7481
Pt    0.4936    0.5940    0.8030
Pt    0.3965    0.5491    0.7993
Pt    0.3986    0.5523    0.8519
Pt    0.3207    0.5234    0.8004
Pt    0.3983    0.5975    0.7988
Pt    0.4467    0.6485    0.7497
Pt    0.2717    0.5208    0.7982
Pt    0.4965    0.5959    0.7494
Pt    0.3746    0.5253    0.7512
Pt    0.4497    0.5983    0.7498
Pt    0.4465    0.5470    0.8007
Pt    0.4710    0.6696    0.7480
Pt    0.4454    0.5980    0.7994
Pt    0.4743    0.6940    0.7728
Pt    0.4438    0.6477    0.8009
Pt    0.4472    0.6492    0.8498
Pt    0.4736    0.5697    0.8045
Pt    0.4468    0.6943    0.8016
Pt    0.4465    0.6924    0.8494
Pt    0.4705    0.6468    0.8233
Pt    0.3696    0.5237    0.7989
Pt    0.4705    0.7210    0.7497
Pt    0.2753    0.6194    0.8506
Pt    0.4721    0.6736    0.8503
Pt    0.4714    0.6707    0.7947
Pt    0.4974    0.5461    0.7498
Pt    0.4706    0.6223    0.8507
Pt    0.4687    0.6197    0.7984
Pt    0.4678    0.5460    0.7715
Pt    0.2977    0.5225    0.7751
Pt    0.2971    0.5213    0.8224
Pt    0.3982    0.5484    0.7505
Pt    0.3010    0.5749    0.7738
Pt    0.2973    0.5744    0.8207
Pt    0.4740    0.5285    0.8010
Pt    0.4957    0.7197    0.7756
Pt    0.3488    0.5237    0.7718
Pt    0.3460    0.5230    0.8238
Pt    0.3994    0.4986    0.8002
Pt    0.3488    0.5789    0.7741
Pt    0.3452    0.5744    0.8247
Pt    0.4704    0.6440    0.7750
Pt    0.3972    0.5235    0.7745
Pt    0.3933    0.5241    0.8236
Pt    0.3216    0.5227    0.7482
Pt    0.4011    0.5741    0.7736
Pt    0.3941    0.5708    0.8256
Pt    0.3995    0.6217    0.7734
Pt    0.4224    0.7181    0.8530
Pt    0.4490    0.5181    0.7765
Pt    0.4480    0.5222    0.8225
Pt    0.4491    0.5723    0.7766
Pt    0.4466    0.5707    0.8234
Pt    0.4421    0.6243    0.7735
Pt    0.4465    0.6215    0.8250
Pt    0.4458    0.6728    0.7758
Pt    0.4491    0.6719    0.8224
Pt    0.4244    0.4985    0.7758
Pt    0.4442    0.7207    0.7833
Pt    0.4423    0.7182    0.8264
Pt    0.4202    0.6220    0.8027
Pt    0.3228    0.5001    0.7722
Pt    0.2486    0.4983    0.7502
Pt    0.3730    0.5743    0.7983
Pt    0.2752    0.5506    0.7730
Pt    0.2731    0.5487    0.8203
Pt    0.4212    0.5723    0.8024
Pt    0.2698    0.5958    0.8233
Pt    0.4206    0.5229    0.8479
Pt    0.4212    0.5235    0.7999
Pt    0.2960    0.5235    0.8682
Pt    0.4970    0.5693    0.7742
Pt    0.2685    0.5704    0.8485
Pt    0.3230    0.5471    0.7744
Pt    0.3238    0.5495    0.8216
Pt    0.4684    0.5968    0.8269
Pt    0.4722    0.7423    0.7761
Pt    0.2498    0.6586    0.8195
Pt    0.3684    0.6248    0.7496
Pt    0.4961    0.7469    0.8468
Pt    0.3746    0.5490    0.7738
Pt    0.3709    0.5479    0.8245
Pt    0.4728    0.5963    0.7776
Pt    0.3759    0.5990    0.7689
Pt    0.4721    0.6970    0.8230
Pt    0.4725    0.5484    0.8305
Pt    0.4484    0.6976    0.7534
Pt    0.4234    0.5492    0.7724
Pt    0.4184    0.5484    0.8263
Pt    0.4218    0.5970    0.7751
Pt    0.4207    0.6500    0.7779
Pt    0.4228    0.6963    0.7754
Pt    0.3707    0.5718    0.8473
Pt    0.4205    0.7477    0.8230
Pt    0.4968    0.5216    0.8265
Pt    0.4958    0.6206    0.7727
Pt    0.4930    0.6473    0.8497
Pt    0.4642    0.7438    0.8226
Pt    0.3974    0.5237    0.8724
Pt    0.4711    0.5717    0.7515
Pt    0.4222    0.6728    0.7492
Pt    0.3466    0.5477    0.7495
Pt    0.3005    0.6211    0.8727
Pt    0.3966    0.7446    0.8445
Pt    0.4971    0.6452    0.7962
Pt    0.4954    0.5972    0.8477
Pt    0.4974    0.5219    0.7740
Pt    0.4461    0.7447    0.8521
Pt    0.2479    0.6480    0.8496
Pt    0.4698    0.6237    0.7497
Pt    0.3465    0.5713    0.8726
Pt    0.3958    0.7200    0.8728
Pt    0.2683    0.5485    0.8711
Pt    0.3708    0.7474    0.8705
Pt    0.4971    0.6940    0.8505
Pt    0.2478    0.5700    0.8230
Pt    0.3481    0.5216    0.8727
Pt    0.4946    0.7443    0.7495
Pt    0.2691    0.5782    0.7480
Pt    0.4724    0.7465    0.9254
Pt    0.2488    0.5453    0.8974
Pt    0.3471    0.6983    0.9975
Pt    0.2713    0.4984    0.9732
Pt    0.4722    0.7221    0.9497
Pt    0.4745    0.7206    0.9971
Pt    0.4748    0.7218    0.8983
Pt    0.2953    0.6975    0.9969
Pt    0.4744    0.6722    0.9486
Pt    0.2488    0.6240    0.9728
Pt    0.2733    0.5227    0.9975
Pt    0.2504    0.6216    0.9242
Pt    0.2993    0.5447    0.8963
Pt    0.2997    0.5460    0.9513
Pt    0.2962    0.5965    0.9012
Pt    0.2972    0.5962    0.9489
Pt    0.2994    0.6469    0.8957
Pt    0.2988    0.6510    0.9489
Pt    0.3013    0.6996    0.9469
Pt    0.2533    0.7284    0.9169
Pt    0.2491    0.7011    0.9954
Pt    0.3468    0.5475    0.8988
Pt    0.3460    0.5714    0.9212
Pt    0.3483    0.5971    0.9443
Pt    0.3455    0.6488    0.9455
Pt    0.3486    0.6971    0.9483
Pt    0.2730    0.7472    0.9705
Pt    0.3944    0.6459    0.9469
Pt    0.3938    0.6957    0.8972
Pt    0.3964    0.6965    0.9481
Pt    0.4467    0.6950    0.9013
Pt    0.4507    0.6989    0.9494
Pt    0.3949    0.7472    0.8967
Pt    0.2722    0.5962    0.8756
Pt    0.3246    0.7483    0.9204
Pt    0.4241    0.6917    0.8749
Pt    0.4708    0.6706    0.8995
Pt    0.4952    0.7223    0.9240
Pt    0.4227    0.7218    0.9496
Pt    0.4240    0.6687    0.9954
Pt    0.4441    0.7198    0.8755
Pt    0.4196    0.7212    0.8992
Pt    0.2997    0.5248    0.9254
Pt    0.2978    0.5193    0.9746
Pt    0.2952    0.5705    0.9269
Pt    0.3003    0.5726    0.9736
Pt    0.2996    0.6265    0.9245
Pt    0.2990    0.6235    0.9716
Pt    0.2995    0.6730    0.9236
Pt    0.2986    0.6756    0.9722
Pt    0.2970    0.7225    0.9218
Pt    0.2985    0.7218    0.9728
Pt    0.3497    0.5242    0.9254
Pt    0.3504    0.5727    0.9709
Pt    0.3476    0.6246    0.9199
Pt    0.3478    0.6222    0.9755
Pt    0.3446    0.6758    0.9212
Pt    0.3489    0.6705    0.9717
Pt    0.3497    0.7219    0.9210
Pt    0.3485    0.7236    0.9743
Pt    0.3977    0.6214    0.9731
Pt    0.3952    0.6708    0.9190
Pt    0.3980    0.6697    0.9702
Pt    0.3977    0.7178    0.9227
Pt    0.3962    0.7270    0.9713
Pt    0.4474    0.6695    0.9246
Pt    0.4502    0.6703    0.9701
Pt    0.4476    0.7223    0.9224
Pt    0.4462    0.7227    0.9732
Pt    0.2480    0.6757    0.9724
Pt    0.2920    0.5690    0.8745
Pt    0.2740    0.5469    0.9221
Pt    0.2769    0.5472    0.9734
Pt    0.2726    0.5964    0.9262
Pt    0.2738    0.6007    0.9758
Pt    0.2756    0.6458    0.9240
Pt    0.2766    0.6518    0.9733
Pt    0.2728    0.7003    0.9218
Pt    0.2716    0.6993    0.9713
Pt    0.4967    0.6470    0.8971
Pt    0.3762    0.7197    0.9965
Pt    0.3223    0.5483    0.9232
Pt    0.3274    0.5512    0.9682
Pt    0.3227    0.5999    0.9231
Pt    0.3261    0.5960    0.9715
Pt    0.3236    0.6494    0.9168
Pt    0.3244    0.6483    0.9722
Pt    0.3239    0.7008    0.9232
Pt    0.3243    0.6978    0.9735
Pt    0.4193    0.6696    0.9452
Pt    0.3718    0.6001    0.9728
Pt    0.3699    0.6489    0.9232
Pt    0.3716    0.6463    0.9712
Pt    0.3715    0.6933    0.9197
Pt    0.3740    0.6957    0.9730
Pt    0.4232    0.6425    0.9685
Pt    0.4263    0.6962    0.9251
Pt    0.4249    0.6932    0.9705
Pt    0.4213    0.6714    0.9003
Pt    0.4720    0.6977    0.9247
Pt    0.4745    0.6969    0.9741
Pt    0.2738    0.5219    0.8973
Pt    0.2745    0.5192    0.9470
Pt    0.2698    0.5710    0.9019
Pt    0.2716    0.5731    0.9527
Pt    0.2751    0.6198    0.9011
Pt    0.2765    0.6222    0.9476
Pt    0.2759    0.6719    0.9021
Pt    0.2748    0.6764    0.9481
Pt    0.2747    0.7246    0.9475
Pt    0.3288    0.5199    0.8991
Pt    0.3263    0.5233    0.9531
Pt    0.3215    0.5723    0.8997
Pt    0.3258    0.5753    0.9436
Pt    0.3251    0.6215    0.8972
Pt    0.3254    0.6210    0.9472
Pt    0.3239    0.6739    0.9503
Pt    0.3229    0.7273    0.9500
Pt    0.3729    0.5213    0.8980
Pt    0.3697    0.6239    0.9476
Pt    0.3719    0.6746    0.9462
Pt    0.3717    0.7218    0.8992
Pt    0.3733    0.7220    0.9462
Pt    0.3700    0.7474    0.9225
Pt    0.2981    0.6468    0.9965
Pt    0.4208    0.7463    0.9233
Pt    0.3194    0.5933    0.8749
Pt    0.2518    0.6725    0.9250
Pt    0.3728    0.4984    0.9247
Pt    0.4444    0.7482    0.8987
Pt    0.2498    0.5692    0.9748
Pt    0.2755    0.5741    0.9950
Pt    0.3475    0.5472    0.9938
Pt    0.4734    0.7450    0.8730
Pt    0.3496    0.7480    0.8974
Pt    0.4962    0.6713    0.8760
Pt    0.4744    0.6677    0.9953
Pt    0.2740    0.6429    0.8731
Pt    0.4509    0.6445    0.9946
Pt    0.2511    0.5452    0.9486
Pt    0.3726    0.5491    0.8743
Pt    0.4466    0.7449    0.9493
Pt    0.3239    0.7236    0.9952
Pt    0.4187    0.7446    0.8738
Pt    0.3217    0.5497    0.8748
Pt    0.2514    0.5209    0.9232
Pt    0.3233    0.5005    0.9261
Pt    0.4917    0.6224    0.8730
Pt    0.4215    0.6245    0.9956
Pt    0.2492    0.6978    0.8965
Pt    0.4740    0.7441    0.9729
Pt    0.2501    0.6661    0.8766
Pt    0.2712    0.7234    0.9976
Pt    0.4707    0.6487    0.8742
Pt    0.4224    0.7213    0.9949
Pt    0.3989    0.6956    0.9965
Pt    0.4970    0.7164    0.8735
Pt    0.2525    0.6438    0.8990
Pt    0.4485    0.6952    0.9945
Pt    0.4694    0.6944    0.8763
Pt    0.4455    0.6682    0.8777
Pt    0.2723    0.6723    0.9978
Pt    0.3255    0.5693    0.9976
Pt    0.2521    0.5997    0.9973
Pt    0.4758    0.9709    0.0962
Pt    0.4719    0.7715    0.9990
[truncated: 517,212 more chars]
