# Supplementary material
Source: publisher figshare collection journal article supplement (https://rs.figshare.com/ndownloader/files/37464464)
Supplement: Supplementary file 2 [file 37464464 › Ordered_Nanoporous_Metals_SI/ONMs_Crystal_Structures/ONM_from_ST_SOD-ST3.cif]

data_block_1
#***********************************************************************************************
#
# On use of this cif file, please acknowledge citation to:
#
# Understanding the stability and structural properties of Ordered Nanoporous Metals towards their rational synthesis
# Jose M. Ortiz-Roldan, Salvador R. G. Balestra, Rocio Bueno-Perez, Sof�a Calero,
# Elena Garcia-Perez, C. Richard A. Catlow, A. Rabdel Ruiz-Salvador, Said Hamad
# Proc. R Soc. A 2022
#
# Contact emails: : said@upo.es, rruisal@upo.es, c.r.a.catlow@ucl.ac.uk
#
#***********************************************************************************************

_audit_creation_date         'Tue March 22 2022'
_audit_creation_method       'generated by GDIS v0.90'


_cell_length_a             89.3722
_cell_length_b             89.5031
_cell_length_c             89.4079
_cell_angle_alpha          90.00
_cell_angle_beta           90.00
_cell_angle_gamma          90.00


_symmetry_space_group_name_H-M   'P 1'
_symmetry_Int_Tables_number       1


loop_
_atom_site_label
_atom_site_fract_x
_atom_site_fract_y
_atom_site_fract_z
Pt    0.2528    0.2527    0.0998
Pt    0.2518    0.2542    0.0563
Pt    0.1242    0.0805    0.0587
Pt    0.2547    0.2112    0.0989
Pt    0.2547    0.2099    0.0563
Pt    0.2547    0.1660    0.1003
Pt    0.0150    0.0574    0.1017
Pt    0.2118    0.2540    0.0992
Pt    0.2074    0.2556    0.0560
Pt    0.2100    0.2097    0.0993
Pt    0.2093    0.2081    0.0533
Pt    0.0822    0.1255    0.0161
Pt    0.2129    0.1692    0.1005
Pt    0.2536    0.0158    0.0382
Pt    0.2117    0.1213    0.1018
Pt    0.2118    0.0815    0.0594
Pt    0.1230    0.0354    0.1029
Pt    0.1257    0.0370    0.0594
Pt    0.1686    0.1210    0.1022
Pt    0.1696    0.1234    0.0572
Pt    0.1685    0.0379    0.0149
Pt    0.0590    0.0598    0.0587
Pt    0.0570    0.0594    0.1008
Pt    0.0819    0.2110    0.0594
Pt    0.0569    0.1033    0.0589
Pt    0.0576    0.1009    0.1042
Pt    0.0811    0.1656    0.1040
Pt    0.0589    0.1476    0.0617
Pt    0.0580    0.1463    0.1049
Pt    0.0829    0.1701    0.0149
Pt    0.0604    0.1905    0.0596
Pt    0.0570    0.1918    0.1068
Pt    0.0816    0.1669    0.0587
Pt    0.1708    0.1249    0.0166
Pt    0.1708    0.0789    0.1015
Pt    0.1698    0.0792    0.0579
Pt    0.0810    0.1228    0.1033
Pt    0.1002    0.0593    0.0583
Pt    0.1030    0.0577    0.1040
Pt    0.0792    0.1260    0.0603
Pt    0.1029    0.1024    0.0577
Pt    0.1010    0.1002    0.1038
Pt    0.2134    0.0151    0.0356
Pt    0.1042    0.1454    0.0602
Pt    0.1024    0.1450    0.1027
Pt    0.2543    0.0378    0.0152
Pt    0.1029    0.1876    0.0585
Pt    0.1007    0.1894    0.1016
Pt    0.0800    0.0803    0.1046
Pt    0.1702    0.0370    0.1046
Pt    0.0155    0.0367    0.0389
Pt    0.0794    0.0822    0.0561
Pt    0.1481    0.0571    0.0596
Pt    0.1459    0.0571    0.1059
Pt    0.2110    0.2307    0.0355
Pt    0.1476    0.1012    0.0591
Pt    0.1461    0.1010    0.1038
Pt    0.0806    0.0376    0.1021
Pt    0.1480    0.1457    0.0566
Pt    0.1467    0.1431    0.1005
Pt    0.1455    0.1888    0.1029
Pt    0.1454    0.2331    0.1012
Pt    0.1701    0.0368    0.0575
Pt    0.1693    0.0802    0.0157
Pt    0.0394    0.1260    0.0187
Pt    0.2565    0.1449    0.1249
Pt    0.1908    0.0584    0.0594
Pt    0.1918    0.0596    0.1032
Pt    0.0801    0.0363    0.0592
Pt    0.1912    0.1028    0.0570
Pt    0.1930    0.1006    0.1011
Pt    0.1901    0.1438    0.1013
Pt    0.1906    0.1865    0.0559
Pt    0.1890    0.1874    0.0987
Pt    0.1873    0.2347    0.0580
Pt    0.1879    0.2325    0.1006
Pt    0.1219    0.2117    0.0998
Pt    0.1249    0.1666    0.1023
Pt    0.0374    0.2541    0.0178
Pt    0.2331    0.1410    0.0988
Pt    0.2341    0.1874    0.0574
Pt    0.2336    0.1882    0.0996
Pt    0.2107    0.1875    0.1224
Pt    0.2301    0.2317    0.0573
Pt    0.2332    0.2310    0.1004
Pt    0.2119    0.0366    0.0579
Pt    0.1247    0.0796    0.0158
Pt    0.1238    0.0797    0.1037
Pt    0.2526    0.2311    0.1227
Pt    0.0368    0.2116    0.0613
Pt    0.1267    0.1693    0.0162
Pt    0.2521    0.2315    0.0762
Pt    0.2543    0.2316    0.0371
Pt    0.2116    0.2314    0.1213
Pt    0.2116    0.1867    0.0765
Pt    0.1660    0.2541    0.0999
Pt    0.2535    0.1886    0.1222
Pt    0.1668    0.2107    0.0993
Pt    0.1672    0.1655    0.1003
Pt    0.1673    0.1676    0.0602
Pt    0.0596    0.0383    0.0376
Pt    0.0579    0.0372    0.0806
Pt    0.0579    0.0364    0.1261
Pt    0.0565    0.0806    0.0354
Pt    0.0581    0.0810    0.0797
Pt    0.0581    0.0797    0.1284
Pt    0.0594    0.1265    0.0389
Pt    0.0593    0.1253    0.0836
Pt    0.0586    0.1242    0.1265
Pt    0.0600    0.1700    0.0380
Pt    0.0591    0.1723    0.0838
Pt    0.0598    0.1679    0.1261
Pt    0.0586    0.2126    0.0380
Pt    0.0586    0.2127    0.0825
Pt    0.1031    0.0363    0.0378
Pt    0.1015    0.0365    0.0805
Pt    0.1012    0.0353    0.1273
Pt    0.1024    0.0805    0.0370
Pt    0.1013    0.0803    0.0821
Pt    0.1011    0.0795    0.1266
Pt    0.1037    0.1261    0.0368
Pt    0.1023    0.1219    0.0811
Pt    0.1022    0.1239    0.1268
Pt    0.1037    0.1695    0.0357
Pt    0.1051    0.1669    0.0801
Pt    0.1027    0.1662    0.1246
Pt    0.1015    0.2109    0.1230
Pt    0.1475    0.0366    0.0370
Pt    0.1456    0.0381    0.0837
Pt    0.1474    0.0347    0.1271
Pt    0.1467    0.0801    0.0385
Pt    0.1469    0.0793    0.0832
Pt    0.1495    0.0797    0.1264
Pt    0.1484    0.1247    0.0366
Pt    0.1475    0.1208    0.0795
Pt    0.1462    0.1206    0.1260
Pt    0.1465    0.1705    0.0387
Pt    0.1463    0.1688    0.0789
Pt    0.1453    0.1648    0.1244
Pt    0.1456    0.2088    0.0778
Pt    0.1455    0.2095    0.1228
Pt    0.1439    0.2543    0.1231
Pt    0.1919    0.0337    0.0342
Pt    0.1936    0.0368    0.0821
Pt    0.1908    0.0802    0.0388
Pt    0.1922    0.0794    0.0814
Pt    0.1928    0.0788    0.1243
Pt    0.1906    0.1245    0.0797
Pt    0.1906    0.1219    0.1226
Pt    0.1898    0.1657    0.0799
Pt    0.1896    0.1656    0.1214
Pt    0.1886    0.2098    0.0771
Pt    0.1887    0.2091    0.1192
Pt    0.1856    0.2561    0.0769
Pt    0.1876    0.2534    0.1196
Pt    0.2322    0.0371    0.0396
Pt    0.2350    0.1224    0.1233
Pt    0.2338    0.1659    0.0790
Pt    0.2342    0.1690    0.1245
Pt    0.2318    0.2085    0.0352
Pt    0.2323    0.2096    0.0768
Pt    0.2312    0.2084    0.1229
Pt    0.2296    0.2540    0.0350
Pt    0.2308    0.2525    0.0779
Pt    0.2323    0.2538    0.1235
Pt    0.1252    0.1690    0.0581
Pt    0.0366    0.0378    0.0582
Pt    0.2090    0.2324    0.0796
Pt    0.0349    0.0588    0.0364
Pt    0.0375    0.0576    0.0806
Pt    0.0372    0.0596    0.1244
Pt    0.0374    0.1044    0.0367
Pt    0.0361    0.1029    0.0818
Pt    0.0371    0.1009    0.1260
Pt    0.0389    0.1482    0.0400
Pt    0.0377    0.1469    0.0845
Pt    0.0396    0.1457    0.1262
Pt    0.0378    0.1913    0.0374
Pt    0.0372    0.1917    0.0847
Pt    0.0362    0.2323    0.0405
Pt    0.2555    0.1877    0.0777
Pt    0.0372    0.1689    0.1044
Pt    0.0383    0.1713    0.0619
Pt    0.0797    0.0601    0.0355
Pt    0.0800    0.0594    0.0783
Pt    0.0791    0.0589    0.1261
Pt    0.0811    0.1038    0.0353
Pt    0.0801    0.1007    0.0781
Pt    0.0777    0.1029    0.1260
Pt    0.0826    0.1467    0.0382
Pt    0.0821    0.1473    0.0811
Pt    0.0800    0.1458    0.1248
Pt    0.0800    0.1929    0.0362
Pt    0.0808    0.1918    0.0795
Pt    0.0818    0.1871    0.1234
Pt    0.0604    0.1908    0.0150
Pt    0.0376    0.0798    0.1044
Pt    0.0357    0.0796    0.0588
Pt    0.1252    0.0579    0.0386
Pt    0.1243    0.0594    0.0791
Pt    0.1242    0.0567    0.1261
Pt    0.1255    0.1026    0.0371
Pt    0.1258    0.1014    0.0804
Pt    0.1242    0.1004    0.1244
Pt    0.1254    0.1465    0.0377
Pt    0.1253    0.1458    0.0802
Pt    0.1250    0.1430    0.1227
Pt    0.1238    0.1905    0.0797
Pt    0.1242    0.1859    0.1242
Pt    0.1244    0.2325    0.1207
Pt    0.0377    0.1234    0.1053
Pt    0.1250    0.1227    0.0994
Pt    0.0377    0.0373    0.1041
Pt    0.1695    0.0575    0.0353
Pt    0.1697    0.0577    0.0813
Pt    0.1712    0.0564    0.1255
Pt    0.1687    0.1013    0.0375
Pt    0.1706    0.1018    0.0786
Pt    0.1699    0.1007    0.1229
Pt    0.1702    0.1477    0.0365
Pt    0.1679    0.1439    0.0778
Pt    0.1681    0.1434    0.1239
Pt    0.1687    0.1895    0.0785
Pt    0.1669    0.1900    0.1223
Pt    0.1664    0.2319    0.0796
Pt    0.1667    0.2306    0.1239
Pt    0.1270    0.1240    0.0589
Pt    0.0376    0.1258    0.0622
Pt    0.2116    0.0590    0.0380
Pt    0.2135    0.0577    0.0796
Pt    0.2144    0.1001    0.1234
Pt    0.2117    0.1441    0.0782
Pt    0.2123    0.1451    0.1212
Pt    0.1005    0.0144    0.1040
Pt    0.0161    0.1031    0.0610
Pt    0.1909    0.0587    0.0163
Pt    0.1469    0.0161    0.1047
Pt    0.0605    0.1487    0.0162
Pt    0.0163    0.1689    0.0833
Pt    0.0154    0.0368    0.1237
Pt    0.0596    0.0164    0.0181
Pt    0.0163    0.1442    0.0179
Pt    0.2328    0.0592    0.0183
Pt    0.0162    0.2128    0.0851
Pt    0.0155    0.2343    0.0164
Pt    0.0799    0.0153    0.0401
Pt    0.1265    0.0157    0.0806
Pt    0.0584    0.2338    0.0185
Pt    0.0163    0.2338    0.0621
Pt    0.1917    0.0144    0.0610
Pt    0.1222    0.0147    0.1235
Pt    0.0159    0.1898    0.0609
Pt    0.0154    0.1914    0.1041
Pt    0.0823    0.0363    0.0157
Pt    0.0818    0.0147    0.0807
Pt    0.1043    0.1903    0.0161
Pt    0.0800    0.2131    0.0163
Pt    0.2111    0.0810    0.0174
Pt    0.1679    0.0171    0.0805
Pt    0.1055    0.0165    0.0587
Pt    0.1702    0.0151    0.1265
Pt    0.0157    0.1029    0.1036
Pt    0.2143    0.0150    0.0828
Pt    0.0378    0.1687    0.0162
Pt    0.1669    0.1681    0.0168
Pt    0.0366    0.0357    0.0161
Pt    0.1031    0.1044    0.0150
Pt    0.0166    0.1904    0.0174
Pt    0.1036    0.0149    0.0154
Pt    0.0179    0.1673    0.0390
Pt    0.0589    0.1043    0.0154
Pt    0.0802    0.0816    0.0151
Pt    0.2345    0.0174    0.0617
Pt    0.0579    0.0152    0.0595
Pt    0.0359    0.0144    0.1252
Pt    0.1920    0.0178    0.1049
Pt    0.0160    0.1235    0.0392
Pt    0.1462    0.0601    0.0162
Pt    0.1911    0.1022    0.0168
Pt    0.0181    0.1690    0.1259
Pt    0.0375    0.0161    0.0808
Pt    0.1461    0.1480    0.0151
Pt    0.0162    0.1466    0.0612
Pt    0.2551    0.2539    0.2320
Pt    0.2546    0.2538    0.1857
Pt    0.1683    0.2078    0.1435
Pt    0.2552    0.2125    0.2301
Pt    0.0152    0.0349    0.2547
Pt    0.2552    0.2115    0.1867
Pt    0.2122    0.1230    0.2326
Pt    0.2542    0.2106    0.1426
Pt    0.2553    0.1661    0.2337
Pt    0.2136    0.0782    0.1462
Pt    0.2587    0.0747    0.1870
Pt    0.0152    0.0155    0.1453
Pt    0.2549    0.0347    0.2336
Pt    0.0587    0.0590    0.1486
Pt    0.0602    0.0584    0.1918
Pt    0.0585    0.1014    0.1517
Pt    0.0588    0.1035    0.1936
Pt    0.0574    0.1445    0.1479
Pt    0.0582    0.1858    0.1894
Pt    0.0570    0.1845    0.2314
Pt    0.0583    0.2312    0.1884
Pt    0.0562    0.2304    0.2325
Pt    0.2549    0.2556    0.1447
Pt    0.2110    0.2536    0.2306
Pt    0.1019    0.0580    0.1479
Pt    0.1030    0.0588    0.1897
Pt    0.1026    0.1010    0.1466
Pt    0.1025    0.0978    0.1946
Pt    0.1013    0.1439    0.1467
Pt    0.1019    0.1457    0.1913
Pt    0.1005    0.1419    0.2325
Pt    0.1024    0.1861    0.1448
Pt    0.0990    0.1873    0.1864
Pt    0.1000    0.1882    0.2326
Pt    0.1022    0.2320    0.1421
Pt    0.1005    0.2317    0.1887
Pt    0.1005    0.2304    0.2328
Pt    0.2105    0.2517    0.1878
Pt    0.1465    0.0562    0.1456
Pt    0.1453    0.0987    0.1477
Pt    0.1452    0.0986    0.1894
Pt    0.1468    0.1000    0.2352
Pt    0.1459    0.1431    0.1460
Pt    0.1443    0.1435    0.1913
Pt    0.1412    0.1450    0.2343
Pt    0.1455    0.1874    0.1436
Pt    0.1450    0.1856    0.1887
Pt    0.1446    0.1874    0.2324
Pt    0.1436    0.2282    0.1433
Pt    0.1465    0.2279    0.1887
Pt    0.1451    0.2310    0.2338
Pt    0.1918    0.0570    0.1878
Pt    0.1906    0.0572    0.2333
Pt    0.1913    0.1017    0.1454
Pt    0.1890    0.0983    0.1883
Pt    0.1895    0.1027    0.2332
Pt    0.1887    0.1432    0.1471
Pt    0.1894    0.1444    0.1892
Pt    0.1913    0.1452    0.2336
Pt    0.1891    0.1865    0.1449
Pt    0.1897    0.1878    0.1884
Pt    0.1871    0.1872    0.2341
Pt    0.1885    0.2313    0.1424
Pt    0.1860    0.2316    0.1892
Pt    0.1888    0.2316    0.2329
Pt    0.2119    0.0783    0.2330
Pt    0.2333    0.0597    0.1894
Pt    0.2343    0.0565    0.2351
Pt    0.2351    0.0976    0.1433
Pt    0.2332    0.1012    0.1895
Pt    0.2323    0.0993    0.2340
Pt    0.2317    0.1451    0.1421
Pt    0.2343    0.1447    0.1898
Pt    0.2337    0.1443    0.2312
Pt    0.2323    0.1879    0.1460
Pt    0.2336    0.1888    0.1888
Pt    0.2345    0.1886    0.2322
Pt    0.2325    0.2334    0.1456
Pt    0.2310    0.2302    0.1889
Pt    0.2341    0.2344    0.2343
Pt    0.0163    0.0798    0.2134
Pt    0.2539    0.1674    0.1896
Pt    0.2559    0.1656    0.1434
Pt    0.2562    0.1220    0.2308
Pt    0.2559    0.1208    0.1880
Pt    0.2111    0.0780    0.1908
Pt    0.2541    0.1215    0.1464
Pt    0.2546    0.0778    0.2329
Pt    0.0586    0.0366    0.1711
Pt    0.0606    0.0366    0.2123
Pt    0.0577    0.0785    0.1709
Pt    0.0584    0.0799    0.2131
Pt    0.0612    0.1230    0.1715
Pt    0.0574    0.1644    0.1703
Pt    0.0548    0.2091    0.2103
Pt    0.0551    0.2039    0.2541
Pt    0.0568    0.2533    0.2101
Pt    0.0552    0.2519    0.2530
Pt    0.1013    0.0357    0.1694
Pt    0.1017    0.0812    0.1695
Pt    0.1013    0.1214    0.1671
Pt    0.1013    0.1208    0.2127
Pt    0.1010    0.1664    0.1679
Pt    0.0975    0.1656    0.2107
Pt    0.0990    0.1670    0.2535
Pt    0.1012    0.2091    0.1656
Pt    0.1024    0.2077    0.2113
Pt    0.0998    0.2093    0.2542
Pt    0.1012    0.2526    0.1656
Pt    0.1023    0.2519    0.2129
Pt    0.0987    0.2526    0.2535
Pt    0.1459    0.0331    0.1688
Pt    0.1470    0.0768    0.1680
Pt    0.1486    0.0768    0.2111
Pt    0.1450    0.1195    0.1684
Pt    0.1451    0.1228    0.2116
Pt    0.1467    0.1218    0.2552
Pt    0.1450    0.1647    0.1687
Pt    0.1455    0.1654    0.2121
Pt    0.1449    0.1649    0.2536
Pt    0.1436    0.2077    0.1667
Pt    0.1462    0.2093    0.2110
Pt    0.1451    0.2102    0.2540
Pt    0.1452    0.2506    0.1664
Pt    0.1441    0.2549    0.2110
Pt    0.1439    0.2546    0.2555
Pt    0.1906    0.0779    0.1668
Pt    0.1885    0.0796    0.2129
Pt    0.1902    0.0788    0.2552
Pt    0.1896    0.1210    0.1668
Pt    0.1904    0.1209    0.2096
Pt    0.1902    0.1235    0.2546
Pt    0.1907    0.1650    0.1665
Pt    0.1910    0.1688    0.2102
Pt    0.1888    0.1673    0.2555
Pt    0.1897    0.2089    0.1650
Pt    0.1870    0.2089    0.2102
Pt    0.1891    0.2087    0.2545
Pt    0.1885    0.2512    0.1651
Pt    0.1886    0.2535    0.2090
Pt    0.1886    0.2556    0.2531
Pt    0.2329    0.0371    0.2129
Pt    0.2310    0.0341    0.2569
Pt    0.2341    0.0794    0.1681
Pt    0.2333    0.0795    0.2118
Pt    0.2345    0.0756    0.2572
Pt    0.2335    0.1207    0.1660
Pt    0.2331    0.1210    0.2110
Pt    0.2351    0.1225    0.2523
Pt    0.2320    0.1667    0.1665
Pt    0.2334    0.1672    0.2119
Pt    0.2326    0.1641    0.2538
Pt    0.2325    0.2121    0.1642
Pt    0.2324    0.2095    0.2115
Pt    0.2332    0.2109    0.2530
Pt    0.2315    0.2530    0.1669
Pt    0.2340    0.2522    0.2096
Pt    0.2316    0.2548    0.2537
Pt    0.2098    0.1225    0.1871
Pt    0.2083    0.2539    0.1424
Pt    0.2102    0.2102    0.2329
Pt    0.0366    0.0579    0.1704
Pt    0.0383    0.0565    0.2125
Pt    0.0380    0.1031    0.1730
Pt    0.0361    0.1443    0.1670
Pt    0.0346    0.2302    0.2109
Pt    0.0353    0.2285    0.2554
Pt    0.2106    0.2100    0.1888
Pt    0.2091    0.2082    0.1439
Pt    0.0803    0.0585    0.1704
Pt    0.0823    0.0549    0.2138
Pt    0.0789    0.0996    0.1732
Pt    0.0814    0.1432    0.1706
Pt    0.0786    0.1414    0.2131
Pt    0.0760    0.1901    0.1660
Pt    0.0787    0.1875    0.2105
Pt    0.0787    0.1862    0.2552
Pt    0.0798    0.2310    0.1665
Pt    0.0784    0.2299    0.2099
Pt    0.0761    0.2305    0.2534
Pt    0.0592    0.0162    0.2317
Pt    0.1260    0.0564    0.1683
Pt    0.1233    0.0999    0.1669
Pt    0.1252    0.0987    0.2149
Pt    0.1230    0.1408    0.1696
Pt    0.1227    0.1428    0.2116
Pt    0.1195    0.1446    0.2562
Pt    0.1244    0.1867    0.1667
Pt    0.1228    0.1877    0.2112
Pt    0.1216    0.1884    0.2541
Pt    0.1222    0.2287    0.1667
Pt    0.1240    0.2308    0.2106
Pt    0.1219    0.2306    0.2542
Pt    0.2107    0.1667    0.2335
Pt    0.1695    0.0568    0.1665
Pt    0.1674    0.1000    0.1698
Pt    0.1657    0.0995    0.2115
Pt    0.1681    0.0995    0.2549
Pt    0.1664    0.1438    0.1714
Pt    0.1681    0.1442    0.2117
Pt    0.1675    0.1446    0.2538
Pt    0.1666    0.1853    0.1662
Pt    0.1668    0.1885    0.2095
Pt    0.1665    0.1876    0.2549
Pt    0.1665    0.2289    0.1629
Pt    0.1656    0.2318    0.2125
Pt    0.1674    0.2335    0.2550
Pt    0.2104    0.0575    0.2105
Pt    0.2100    0.0575    0.2567
Pt    0.2114    0.0999    0.1668
Pt    0.2095    0.0998    0.2117
Pt    0.2099    0.1011    0.2547
Pt    0.2139    0.1427    0.1665
Pt    0.2110    0.1421    0.2092
Pt    0.2106    0.1418    0.2548
Pt    0.2101    0.1884    0.1668
Pt    0.2115    0.1886    0.2097
Pt    0.2122    0.1877    0.2552
Pt    0.2097    0.2307    0.1647
Pt    0.2102    0.2299    0.2104
Pt    0.2112    0.2324    0.2544
Pt    0.2124    0.1653    0.1870
Pt    0.2547    0.0577    0.2101
Pt    0.2544    0.0539    0.2555
Pt    0.2535    0.0997    0.1674
Pt    0.2554    0.0996    0.2105
Pt    0.2554    0.0992    0.2555
Pt    0.2539    0.1454    0.1654
Pt    0.2563    0.1436    0.2101
Pt    0.2564    0.1430    0.2528
Pt    0.2541    0.1896    0.1672
Pt    0.2561    0.1900    0.2099
Pt    0.2561    0.1906    0.2535
Pt    0.2528    0.2335    0.1651
Pt    0.2565    0.2322    0.2099
Pt    0.2552    0.2322    0.2546
Pt    0.0370    0.0389    0.1479
Pt    0.0358    0.0350    0.1904
Pt    0.0362    0.0351    0.2336
Pt    0.0362    0.0810    0.1479
Pt    0.0360    0.0787    0.1934
Pt    0.0376    0.1218    0.1491
Pt    0.0398    0.1684    0.1477
Pt    0.0345    0.2075    0.2323
Pt    0.0340    0.2523    0.2331
Pt    0.0801    0.0369    0.1479
Pt    0.0818    0.0351    0.1904
Pt    0.0808    0.0809    0.1481
Pt    0.0816    0.0778    0.1965
Pt    0.0795    0.1233    0.1464
Pt    0.0819    0.1225    0.1926
Pt    0.0798    0.1666    0.1481
Pt    0.0771    0.1644    0.1909
Pt    0.0755    0.1632    0.2318
Pt    0.0165    0.1023    0.1951
Pt    0.0782    0.2089    0.1876
Pt    0.0761    0.2078    0.2332
Pt    0.0786    0.2546    0.1879
Pt    0.0781    0.2524    0.2331
Pt    0.1257    0.0348    0.1477
Pt    0.1245    0.0783    0.1466
Pt    0.1252    0.0776    0.1900
Pt    0.1239    0.1226    0.1451
Pt    0.1229    0.1194    0.1920
Pt    0.1229    0.1208    0.2346
Pt    0.1238    0.1634    0.1464
Pt    0.1237    0.1642    0.1896
Pt    0.1197    0.1636    0.2309
Pt    0.1219    0.2096    0.1438
Pt    0.1206    0.2088    0.1886
Pt    0.1233    0.2101    0.2316
Pt    0.1225    0.2537    0.1441
Pt    0.1237    0.2502    0.1873
Pt    0.1221    0.2534    0.2346
Pt    0.1674    0.0343    0.1479
Pt    0.1694    0.0785    0.1467
Pt    0.1689    0.0779    0.1892
Pt    0.1672    0.0771    0.2325
Pt    0.1672    0.1204    0.1469
Pt    0.1664    0.1200    0.1902
Pt    0.1664    0.1224    0.2341
Pt    0.1667    0.1633    0.1467
Pt    0.1684    0.1654    0.1900
Pt    0.1666    0.1650    0.2323
Pt    0.0809    0.2100    0.1439
Pt    0.1673    0.2077    0.1874
Pt    0.1669    0.2088    0.2341
Pt    0.1658    0.2515    0.1423
Pt    0.1640    0.2517    0.1889
Pt    0.1648    0.2547    0.2330
Pt    0.2126    0.0360    0.2357
Pt    0.2121    0.1217    0.1434
Pt    0.2115    0.1653    0.1426
Pt    0.0161    0.0564    0.2346
Pt    0.0832    0.0143    0.2130
Pt    0.0568    0.0159    0.1479
Pt    0.2339    0.0163    0.2362
Pt    0.0157    0.0356    0.2133
Pt    0.1036    0.0159    0.1918
Pt    0.0369    0.0144    0.2125
Pt    0.2558    0.2526    0.3643
Pt    0.2536    0.2551    0.3189
Pt    0.2542    0.2536    0.2744
Pt    0.2103    0.2091    0.3614
Pt    0.2563    0.2313    0.3847
Pt    0.2556    0.0783    0.2772
Pt    0.2537    0.2103    0.3612
Pt    0.2549    0.2103    0.3187
Pt    0.2102    0.1655    0.3184
Pt    0.2116    0.2100    0.3179
Pt    0.0598    0.0590    0.3160
Pt    0.0611    0.0587    0.3605
Pt    0.0577    0.1027    0.3156
Pt    0.0579    0.1002    0.3590
Pt    0.0574    0.1429    0.3603
Pt    0.0553    0.2288    0.2762
Pt    0.2115    0.1238    0.3225
Pt    0.1049    0.0603    0.3177
Pt    0.1028    0.0578    0.3601
Pt    0.1014    0.1023    0.3168
Pt    0.1030    0.1038    0.3618
Pt    0.0978    0.1465    0.2763
Pt    0.1007    0.1470    0.3188
Pt    0.1005    0.1457    0.3627
Pt    0.1017    0.1882    0.2751
Pt    0.1022    0.1888    0.3192
Pt    0.0987    0.1890    0.3629
Pt    0.0973    0.2308    0.2760
Pt    0.1018    0.2303    0.3181
Pt    0.0996    0.2326    0.3625
Pt    0.2555    0.1674    0.2729
Pt    0.1473    0.0568    0.3598
Pt    0.1456    0.1008    0.2745
Pt    0.1447    0.1019    0.3174
Pt    0.1481    0.1009    0.3599
Pt    0.1426    0.1455    0.2745
Pt    0.1432    0.1448    0.3186
Pt    0.1462    0.1436    0.3634
Pt    0.1456    0.1891    0.2769
Pt    0.1463    0.1883    0.3204
Pt    0.1440    0.1898    0.3628
Pt    0.1424    0.2329    0.2769
Pt    0.1440    0.2338    0.3216
Pt    0.1457    0.2323    0.3646
Pt    0.1880    0.1011    0.2751
Pt    0.1888    0.1023    0.3182
Pt    0.1914    0.0999    0.3632
Pt    0.1881    0.1453    0.2758
Pt    0.1885    0.1456    0.3207
Pt    0.1896    0.1437    0.3627
Pt    0.1887    0.1888    0.2781
Pt    0.1892    0.1888    0.3181
Pt    0.1875    0.1899    0.3635
Pt    0.1895    0.2335    0.2748
Pt    0.1864    0.2311    0.3193
Pt    0.1898    0.2339    0.3630
Pt    0.2547    0.1207    0.3641
Pt    0.2331    0.0565    0.2787
Pt    0.2319    0.1004    0.2742
Pt    0.2311    0.1004    0.3196
Pt    0.2318    0.0973    0.3642
Pt    0.2335    0.1446    0.2767
Pt    0.2336    0.1465    0.3191
Pt    0.2334    0.1426    0.3617
Pt    0.2350    0.1882    0.2736
Pt    0.2334    0.1874    0.3204
Pt    0.2325    0.1886    0.3638
Pt    0.2334    0.2316    0.2756
Pt    0.2323    0.2323    0.3153
Pt    0.2326    0.2322    0.3641
Pt    0.2552    0.2106    0.2770
Pt    0.2084    0.0771    0.2790
Pt    0.2120    0.2111    0.2748
Pt    0.2104    0.0782    0.3166
Pt    0.2108    0.1217    0.3623
Pt    0.2555    0.0340    0.2763
Pt    0.2108    0.2526    0.3638
Pt    0.2537    0.1668    0.3634
Pt    0.2560    0.1669    0.3187
Pt    0.0604    0.0406    0.2947
Pt    0.0601    0.0374    0.3372
Pt    0.0607    0.0380    0.3835
Pt    0.0592    0.0801    0.2953
Pt    0.0594    0.0789    0.3374
Pt    0.0580    0.0789    0.3816
Pt    0.0599    0.1240    0.3383
Pt    0.0570    0.1241    0.3797
Pt    0.0573    0.1672    0.3850
Pt    0.0525    0.2494    0.2978
Pt    0.1051    0.0361    0.3364
Pt    0.1030    0.0383    0.3826
Pt    0.1026    0.0804    0.3381
Pt    0.1028    0.0810    0.3816
Pt    0.1001    0.1229    0.2957
Pt    0.1024    0.1256    0.3408
Pt    0.1028    0.1245    0.3857
Pt    0.0993    0.1669    0.2964
Pt    0.1029    0.1667    0.3413
Pt    0.1044    0.1691    0.3854
Pt    0.1015    0.2093    0.2967
Pt    0.0992    0.2099    0.3423
Pt    0.0975    0.2111    0.3826
Pt    0.0988    0.2512    0.2979
Pt    0.0996    0.2537    0.3425
Pt    0.0990    0.2535    0.3868
Pt    0.1476    0.0364    0.3820
Pt    0.1469    0.0795    0.3381
Pt    0.1463    0.0797    0.3809
Pt    0.1419    0.1214    0.2945
Pt    0.1439    0.1234    0.3389
Pt    0.1478    0.1217    0.3847
Pt    0.1457    0.1680    0.2984
Pt    0.1468    0.1672    0.3415
Pt    0.1474    0.1687    0.3846
Pt    0.1450    0.2098    0.2994
Pt    0.1446    0.2128    0.3436
Pt    0.1458    0.2101    0.3833
Pt    0.1417    0.2546    0.2968
Pt    0.1464    0.2545    0.3424
Pt    0.1436    0.2535    0.3856
Pt    0.1871    0.0823    0.2967
Pt    0.1880    0.0797    0.3383
Pt    0.1910    0.0774    0.3820
Pt    0.1896    0.1243    0.2981
Pt    0.1889    0.1218    0.3407
Pt    0.1909    0.1226    0.3848
Pt    0.1860    0.1646    0.2978
Pt    0.1912    0.1663    0.3413
Pt    0.1891    0.1673    0.3875
Pt    0.1908    0.2119    0.2970
Pt    0.1900    0.2098    0.3397
Pt    0.1905    0.2138    0.3839
Pt    0.1873    0.2540    0.2975
Pt    0.1891    0.2547    0.3402
Pt    0.1889    0.2558    0.3847
Pt    0.2356    0.0346    0.2979
Pt    0.2330    0.0794    0.2976
Pt    0.2307    0.0789    0.3400
Pt    0.2325    0.1229    0.2978
Pt    0.2346    0.1205    0.3411
Pt    0.2321    0.1247    0.3848
Pt    0.2332    0.1664    0.2956
Pt    0.2336    0.1654    0.3414
Pt    0.2326    0.1655    0.3871
Pt    0.2327    0.2091    0.2970
Pt    0.2325    0.2104    0.3403
Pt    0.2330    0.2095    0.3865
Pt    0.2339    0.2538    0.2959
Pt    0.2315    0.2514    0.3405
Pt    0.1662    0.2332    0.3841
Pt    0.2543    0.1212    0.3195
Pt    0.1679    0.2564    0.3629
Pt    0.2121    0.1655    0.2755
Pt    0.0362    0.0616    0.2949
Pt    0.0381    0.0575    0.3369
Pt    0.0361    0.0582    0.3798
Pt    0.0376    0.1035    0.3391
Pt    0.0368    0.1016    0.3799
Pt    0.0349    0.1480    0.3830
Pt    0.0328    0.2295    0.2972
Pt    0.2129    0.1671    0.3629
Pt    0.2113    0.2562    0.2745
Pt    0.0830    0.0599    0.2960
Pt    0.0811    0.0592    0.3359
Pt    0.0809    0.0589    0.3822
Pt    0.0806    0.1010    0.3386
Pt    0.0810    0.1033    0.3833
Pt    0.0792    0.1479    0.3374
Pt    0.0798    0.1447    0.3816
Pt    0.0792    0.1886    0.2970
Pt    0.0788    0.1854    0.3395
Pt    0.0782    0.1877    0.3841
Pt    0.0767    0.2282    0.2982
Pt    0.0789    0.2333    0.3378
Pt    0.2111    0.1232    0.2755
Pt    0.2114    0.2531    0.3189
Pt    0.1255    0.0579    0.3392
Pt    0.1247    0.0586    0.3814
Pt    0.1213    0.1009    0.2934
Pt    0.1221    0.1033    0.3400
Pt    0.1263    0.1009    0.3824
Pt    0.1217    0.1455    0.2967
Pt    0.1229    0.1464    0.3418
Pt    0.1242    0.1466    0.3843
Pt    0.1216    0.1888    0.2974
Pt    0.1244    0.1870    0.3409
Pt    0.1235    0.1915    0.3848
Pt    0.1206    0.2298    0.2969
Pt    0.1218    0.2313    0.3405
Pt    0.1210    0.2347    0.3862
Pt    0.2554    0.1201    0.2774
Pt    0.1684    0.0583    0.3830
Pt    0.1667    0.1033    0.2963
Pt    0.1665    0.1010    0.3390
Pt    0.1685    0.1015    0.3840
Pt    0.1658    0.1451    0.2992
Pt    0.1682    0.1445    0.3421
Pt    0.1676    0.1473    0.3850
Pt    0.1670    0.1886    0.2980
Pt    0.1691    0.1894    0.3410
Pt    0.1678    0.1903    0.3857
Pt    0.1655    0.2314    0.2965
Pt    0.1686    0.2329    0.3412
Pt    0.1243    0.0163    0.3844
Pt    0.2120    0.1024    0.2972
Pt    0.2114    0.1003    0.3436
Pt    0.2120    0.1009    0.3848
Pt    0.2117    0.1442    0.2979
Pt    0.2109    0.1459    0.3414
Pt    0.2085    0.1472    0.3853
Pt    0.2129    0.1871    0.2962
Pt    0.2130    0.1884    0.3397
Pt    0.2099    0.1882    0.3843
Pt    0.2100    0.2350    0.2957
Pt    0.2111    0.2308    0.3396
Pt    0.2115    0.2321    0.3870
Pt    0.2540    0.0791    0.3226
Pt    0.2548    0.0575    0.2999
Pt    0.2550    0.0997    0.2988
Pt    0.2539    0.0983    0.3454
Pt    0.2538    0.0992    0.3853
Pt    0.2552    0.1433    0.2967
Pt    0.2545    0.1445    0.3410
Pt    0.2548    0.1460    0.3858
Pt    0.2546    0.1872    0.2977
Pt    0.2570    0.1878    0.3390
Pt    0.2553    0.1899    0.3853
Pt    0.2549    0.2325    0.2961
Pt    0.2552    0.2311    0.3410
Pt    0.2322    0.2546    0.3867
Pt    0.0410    0.0369    0.2724
Pt    0.0375    0.0366    0.3161
Pt    0.0383    0.0353    0.3596
Pt    0.0372    0.0830    0.3166
Pt    0.0359    0.0792    0.3606
Pt    0.0332    0.1248    0.3603
Pt    0.0323    0.2493    0.2774
Pt    0.0846    0.0363    0.3125
Pt    0.0798    0.0370    0.3610
Pt    0.0811    0.0818    0.3143
Pt    0.0825    0.0803    0.3609
Pt    0.0810    0.1236    0.3182
Pt    0.0788    0.1236    0.3610
Pt    0.0786    0.1657    0.3609
Pt    0.0787    0.2082    0.2746
Pt    0.0792    0.2090    0.3196
Pt    0.0762    0.2519    0.2787
Pt    0.0763    0.2543    0.3179
Pt    0.1251    0.0358    0.3577
Pt    0.1238    0.0822    0.3173
Pt    0.1248    0.0810    0.3589
Pt    0.1206    0.1216    0.2731
Pt    0.1231    0.1221    0.3167
Pt    0.1241    0.1233    0.3633
Pt    0.1220    0.1677    0.2764
Pt    0.1243    0.1674    0.3199
Pt    0.1231    0.1688    0.3632
Pt    0.1235    0.2107    0.2748
Pt    0.1238    0.2090    0.3198
Pt    0.1205    0.2131    0.3633
Pt    0.1197    0.2511    0.2744
Pt    0.1205    0.2529    0.3186
Pt    0.1224    0.2539    0.3630
Pt    0.1687    0.0807    0.3604
Pt    0.1681    0.1237    0.2756
Pt    0.1658    0.1233    0.3188
Pt    0.1675    0.1223    0.3622
Pt    0.1668    0.1656    0.2739
Pt    0.1678    0.1644    0.3221
Pt    0.1678    0.1665    0.3624
Pt    0.1660    0.2119    0.2756
Pt    0.1666    0.2101    0.3194
Pt    0.1680    0.2114    0.3609
Pt    0.1650    0.2560    0.2770
Pt    0.1665    0.2536    0.3177
Pt    0.0165    0.0396    0.2928
Pt    0.0406    0.0165    0.2944
Pt    0.1031    0.0176    0.3601
Pt    0.0595    0.0163    0.3170
Pt    0.0170    0.0797    0.3390
Pt    0.0165    0.0364    0.3814
Pt    0.0152    0.0553    0.3579
Pt    0.0818    0.0180    0.3382
Pt    0.0366    0.0162    0.3380
Pt    0.0816    0.0163    0.3837
Pt    0.1695    0.0151    0.3809
Pt    0.0161    0.0596    0.3156
Pt    0.0159    0.1235    0.3833
Pt    0.0158    0.0145    0.3125
Pt    0.0387    0.0146    0.3806
Pt    0.0607    0.0151    0.3589
Pt    0.2541    0.2542    0.4946
Pt    0.2559    0.2546    0.4519
Pt    0.2543    0.2533    0.4068
Pt    0.1269    0.0799    0.4925
Pt    0.0381    0.0159    0.5133
Pt    0.2292    0.2494    0.5132
Pt    0.0159    0.1444    0.4928
Pt    0.0163    0.1234    0.4699
Pt    0.1252    0.0363    0.4499
Pt    0.1684    0.1675    0.4077
Pt    0.0366    0.1235    0.4500
Pt    0.1945    0.0146    0.4490
Pt    0.1704    0.1245    0.4915
Pt    0.1232    0.0392    0.4061
Pt    0.0831    0.2095    0.4947
Pt    0.2547    0.2087    0.4532
Pt    0.1253    0.0997    0.5145
Pt    0.0839    0.1671    0.4926
Pt    0.1252    0.1228    0.4947
Pt    0.0598    0.0599    0.4037
Pt    0.0597    0.0582    0.4485
Pt    0.0586    0.0579    0.4917
Pt    0.0567    0.1006    0.4023
Pt    0.0587    0.1030    0.4477
Pt    0.0596    0.1006    0.4917
Pt    0.0600    0.1452    0.4039
Pt    0.0590    0.1431    0.4475
Pt    0.0609    0.1448    0.4916
Pt    0.0600    0.1901    0.4077
Pt    0.0576    0.1903    0.4506
Pt    0.0618    0.1889    0.4957
Pt    0.0595    0.2323    0.4541
Pt    0.0588    0.2330    0.4912
Pt    0.0799    0.0800    0.4043
Pt    0.1678    0.0150    0.4244
Pt    0.0154    0.1665    0.4280
Pt    0.1044    0.0598    0.4036
Pt    0.1026    0.0558    0.4506
Pt    0.1040    0.0569    0.4949
Pt    0.1030    0.1008    0.4036
Pt    0.1027    0.1008    0.4506
Pt    0.1030    0.0994    0.4908
Pt    0.1014    0.1451    0.4068
Pt    0.1056    0.1441    0.4499
Pt    0.1028    0.1446    0.4931
Pt    0.1010    0.1886    0.4085
Pt    0.1045    0.1881    0.4504
Pt    0.1042    0.1888    0.4955
Pt    0.1024    0.2342    0.4069
Pt    0.1705    0.1231    0.4061
Pt    0.0825    0.0147    0.4720
Pt    0.1472    0.1688    0.5129
Pt    0.1474    0.0569    0.4043
Pt    0.1486    0.0592    0.4495
Pt    0.1481    0.0577    0.4932
Pt    0.1474    0.1007    0.4057
Pt    0.1475    0.1013    0.4508
Pt    0.1507    0.1021    0.4933
Pt    0.1458    0.1470    0.4049
Pt    0.1472    0.1458    0.4495
Pt    0.1484    0.1464    0.4934
Pt    0.1461    0.1910    0.4059
Pt    0.1460    0.1886    0.4482
Pt    0.1440    0.2306    0.4065
Pt    0.1736    0.0790    0.4928
Pt    0.0592    0.0176    0.4492
Pt    0.0806    0.0148    0.5146
Pt    0.1911    0.0569    0.4030
Pt    0.1920    0.0562    0.4470
Pt    0.1948    0.0581    0.4947
Pt    0.1898    0.1002    0.4059
Pt    0.1921    0.1024    0.4497
Pt    0.1932    0.1019    0.4910
Pt    0.1910    0.1450    0.4082
Pt    0.1909    0.1438    0.4490
Pt    0.1894    0.1913    0.4079
Pt    0.1899    0.1882    0.4505
Pt    0.1892    0.2333    0.4067
Pt    0.1919    0.2321    0.4534
Pt    0.2121    0.2086    0.4514
Pt    0.2365    0.0571    0.4471
Pt    0.2389    0.0561    0.4894
Pt    0.2351    0.1001    0.4058
Pt    0.2322    0.1450    0.4070
Pt    0.2338    0.1884    0.4077
Pt    0.2335    0.1882    0.4509
Pt    0.2333    0.2320    0.4082
Pt    0.2323    0.2306    0.4528
Pt    0.2318    0.2305    0.4883
Pt    0.0807    0.2117    0.4520
Pt    0.0369    0.0788    0.4906
Pt    0.2548    0.2097    0.4089
Pt    0.1218    0.2098    0.4094
Pt    0.1254    0.1668    0.4932
Pt    0.2542    0.1666    0.4075
Pt    0.0807    0.2115    0.4054
Pt    0.1242    0.0794    0.4504
Pt    0.2548    0.1221    0.4050
Pt    0.1696    0.1237    0.4517
Pt    0.0391    0.1244    0.4039
Pt    0.1024    0.0160    0.4498
Pt    0.0381    0.2117    0.4519
Pt    0.2131    0.2546    0.4535
Pt    0.2096    0.2539    0.4080
Pt    0.0605    0.0374    0.4244
Pt    0.0607    0.0366    0.4713
Pt    0.1271    0.1228    0.4494
Pt    0.0570    0.0838    0.4254
Pt    0.0605    0.0769    0.4698
Pt    0.0395    0.1651    0.4946
Pt    0.0590    0.1225    0.4267
Pt    0.0609    0.1235    0.4709
Pt    0.1276    0.0356    0.4916
Pt    0.0609    0.1665    0.4267
Pt    0.0586    0.1657    0.4685
Pt    0.0350    0.0791    0.4471
Pt    0.0601    0.2121    0.4291
Pt    0.0618    0.2079    0.4745
Pt    0.2370    0.0354    0.5129
Pt    0.1045    0.0358    0.4274
Pt    0.1038    0.0366    0.4742
Pt    0.0359    0.1675    0.4485
Pt    0.1021    0.0800    0.4284
Pt    0.1015    0.0776    0.4689
Pt    0.0821    0.0149    0.4262
Pt    0.1047    0.1215    0.4282
Pt    0.1060    0.1232    0.4715
Pt    0.1468    0.0151    0.4493
Pt    0.1032    0.1650    0.4278
Pt    0.1048    0.1647    0.4709
Pt    0.1700    0.0796    0.4056
Pt    0.1016    0.2131    0.4310
Pt    0.1050    0.2099    0.4729
Pt    0.1467    0.0375    0.4269
Pt    0.1479    0.0369    0.4699
Pt    0.1706    0.0154    0.5137
Pt    0.1470    0.0809    0.4286
Pt    0.1492    0.0802    0.4715
Pt    0.0798    0.1674    0.4479
Pt    0.1474    0.1222    0.4276
Pt    0.1488    0.1212    0.4731
Pt    0.1730    0.0373    0.4928
Pt    0.1472    0.1664    0.4288
Pt    0.1494    0.1689    0.4716
Pt    0.2104    0.0800    0.4044
Pt    0.1457    0.2102    0.4286
Pt    0.1422    0.2524    0.4270
Pt    0.1924    0.0341    0.4233
Pt    0.1929    0.0366    0.4734
Pt    0.0806    0.1669    0.4039
Pt    0.1890    0.0804    0.4278
Pt    0.1930    0.0774    0.4694
Pt    0.0817    0.0366    0.4929
Pt    0.1908    0.1221    0.4269
Pt    0.1933    0.1240    0.4734
Pt    0.1716    0.0362    0.4481
Pt    0.1890    0.1651    0.4284
Pt    0.1888    0.2117    0.4306
Pt    0.1879    0.2516    0.4322
Pt    0.2376    0.0353    0.4696
Pt    0.2158    0.0335    0.4926
Pt    0.2339    0.0770    0.4685
Pt    0.2339    0.1238    0.4260
Pt    0.2339    0.1670    0.4305
Pt    0.2324    0.2101    0.4300
Pt    0.2329    0.2529    0.4302
Pt    0.2341    0.2543    0.4727
Pt    0.2134    0.0346    0.4447
Pt    0.0363    0.0788    0.4027
Pt    0.0809    0.0371    0.4485
Pt    0.2128    0.2092    0.4081
Pt    0.0370    0.0595    0.4231
Pt    0.0365    0.0574    0.4700
Pt    0.1249    0.1221    0.4047
Pt    0.0352    0.1023    0.4237
Pt    0.0359    0.0996    0.4698
Pt    0.0821    0.0365    0.4051
Pt    0.0387    0.1460    0.4242
Pt    0.0378    0.1449    0.4696
Pt    0.0834    0.1216    0.4913
Pt    0.0373    0.1890    0.4266
Pt    0.0396    0.1870    0.4745
Pt    0.0397    0.1216    0.4913
Pt    0.0362    0.2307    0.4732
Pt    0.1676    0.2546    0.4070
Pt    0.2375    0.0149    0.4909
Pt    0.0359    0.1693    0.4049
Pt    0.2117    0.1677    0.4075
Pt    0.0835    0.0574    0.4275
Pt    0.0799    0.0571    0.4707
Pt    0.1273    0.1669    0.4508
Pt    0.0800    0.1026    0.4261
Pt    0.0796    0.1002    0.4702
Pt    0.1255    0.1684    0.4083
Pt    0.0821    0.1437    0.4279
Pt    0.0809    0.1452    0.4669
Pt    0.0828    0.1236    0.4495
Pt    0.0802    0.1911    0.4293
Pt    0.0839    0.1885    0.4704
Pt    0.0799    0.1217    0.4053
Pt    0.0822    0.2324    0.4727
Pt    0.0364    0.0357    0.4919
Pt    0.0809    0.1450    0.5131
Pt    0.2135    0.1214    0.4474
Pt    0.1244    0.0582    0.4273
Pt    0.1266    0.0571    0.4707
Pt    0.1270    0.0796    0.4056
Pt    0.1228    0.0998    0.4280
Pt    0.1274    0.1016    0.4718
Pt    0.0804    0.0777    0.4926
Pt    0.1250    0.1426    0.4256
Pt    0.1281    0.1445    0.4719
Pt    0.1688    0.0362    0.4032
Pt    0.1247    0.1886    0.4292
Pt    0.1258    0.1883    0.4720
Pt    0.1220    0.2564    0.4064
Pt    0.1259    0.2293    0.4306
Pt    0.1696    0.0801    0.4494
Pt    0.1258    0.0155    0.4267
Pt    0.2127    0.1220    0.4069
Pt    0.1694    0.0564    0.4252
Pt    0.1701    0.0567    0.4702
Pt    0.0386    0.2094    0.4947
Pt    0.1684    0.1026    0.4295
Pt    0.1720    0.1015    0.4705
Pt    0.1263    0.2107    0.4521
Pt    0.1664    0.1441    0.4271
Pt    0.1711    0.1467    0.4726
Pt    0.1694    0.2131    0.4060
Pt    0.1685    0.1884    0.4296
Pt    0.1659    0.2331    0.4306
Pt    0.0382    0.0373    0.4477
Pt    0.2165    0.0782    0.4927
Pt    0.2141    0.0586    0.4250
Pt    0.2136    0.0560    0.4687
Pt    0.0779    0.0795    0.4448
Pt    0.2133    0.1001    0.4267
Pt    0.2151    0.0996    0.4690
Pt    0.2137    0.1474    0.4299
Pt    0.2104    0.1880    0.4298
Pt    0.2103    0.2321    0.4309
Pt    0.2133    0.0774    0.4481
Pt    0.2537    0.1423    0.4282
Pt    0.2559    0.1870    0.4311
Pt    0.2536    0.2310    0.4302
Pt    0.2544    0.2328    0.4721
Pt    0.1684    0.1661    0.4482
Pt    0.0372    0.0333    0.4031
Pt    0.1955    0.0806    0.5144
Pt    0.1497    0.0152    0.4924
Pt    0.0338    0.2520    0.4918
Pt    0.0575    0.0782    0.5144
Pt    0.2620    0.0549    0.5105
Pt    0.2597    0.0185    0.4744
Pt    0.1035    0.1208    0.5138
Pt    0.0166    0.0149    0.4488
Pt    0.0835    0.1007    0.5126
Pt    0.1474    0.0161    0.4040
Pt    0.1703    0.0999    0.5138
Pt    0.2541    0.2294    0.5117
Pt    0.0163    0.1882    0.4944
Pt    0.1286    0.0574    0.5145
Pt    0.1712    0.1438    0.5142
Pt    0.0355    0.0990    0.5123
Pt    0.0616    0.1207    0.5139
Pt    0.1496    0.0790    0.5136
Pt    0.0158    0.0794    0.4263
Pt    0.1488    0.1240    0.5143
Pt    0.1029    0.0144    0.4059
Pt    0.0160    0.1901    0.4504
Pt    0.2648    0.0257    0.5034
Pt    0.0406    0.1420    0.5148
Pt    0.0379    0.0158    0.4695
Pt    0.0164    0.1668    0.4723
Pt    0.1920    0.1211    0.5128
Pt    0.0174    0.1244    0.4267
Pt    0.0158    0.0361    0.4273
Pt    0.0158    0.0358    0.4690
Pt    0.1498    0.0346    0.5147
Pt    0.2185    0.0600    0.5145
Pt    0.1059    0.0355    0.5147
Pt    0.2544    0.2541    0.6214
Pt    0.2529    0.2540    0.5776
Pt    0.2536    0.2510    0.5327
Pt    0.2537    0.2099    0.6212
Pt    0.2557    0.2074    0.5782
Pt    0.2536    0.1658    0.6205
Pt    0.2518    0.1673    0.5776
Pt    0.2557    0.1228    0.6222
Pt    0.0394    0.1907    0.5164
Pt    0.2105    0.2516    0.6202
Pt    0.2098    0.2535    0.5797
Pt    0.2117    0.2076    0.6209
Pt    0.2108    0.2097    0.5750
Pt    0.2132    0.2072    0.5352
Pt    0.2134    0.1657    0.6212
Pt    0.0157    0.2105    0.5174
Pt    0.1675    0.1663    0.6215
Pt    0.1691    0.1660    0.5790
Pt    0.1687    0.1680    0.5339
Pt    0.0574    0.0579    0.5364
Pt    0.0603    0.0573    0.5804
Pt    0.0569    0.0557    0.6253
Pt    0.0603    0.0998    0.5356
Pt    0.0595    0.0993    0.5803
Pt    0.0592    0.1009    0.6234
Pt    0.0615    0.1449    0.5361
Pt    0.0606    0.1457    0.5810
Pt    0.0590    0.1450    0.6238
Pt    0.0595    0.1903    0.5379
Pt    0.0627    0.1901    0.5827
Pt    0.0672    0.1941    0.6105
Pt    0.0590    0.2310    0.5377
Pt    0.1694    0.1231    0.6216
Pt    0.1713    0.1244    0.5781
Pt    0.1701    0.1201    0.5354
Pt    0.1062    0.0556    0.5354
Pt    0.1038    0.0583    0.5799
Pt    0.1056    0.0576    0.6238
Pt    0.1044    0.0996    0.5370
Pt    0.1031    0.1005    0.5812
Pt    0.1018    0.0998    0.6240
Pt    0.1028    0.1428    0.5371
Pt    0.1019    0.1431    0.5805
Pt    0.1036    0.1436    0.6229
Pt    0.1064    0.1905    0.5399
Pt    0.1139    0.1906    0.5724
Pt    0.1018    0.1879    0.6214
Pt    0.1045    0.2323    0.6209
Pt    0.1685    0.0799    0.6233
Pt    0.1730    0.0759    0.5784
Pt    0.1733    0.0788    0.5365
Pt    0.1492    0.0572    0.5366
Pt    0.1497    0.0572    0.5788
Pt    0.1484    0.0583    0.6208
Pt    0.1469    0.0989    0.5353
Pt    0.1516    0.1007    0.5785
Pt    0.1477    0.1005    0.6244
Pt    0.1486    0.1441    0.5348
Pt    0.1489    0.1427    0.5773
Pt    0.1457    0.1440    0.6226
Pt    0.1438    0.1897    0.5770
Pt    0.1439    0.1871    0.6201
Pt    0.1482    0.2311    0.6217
Pt    0.1715    0.0345    0.6260
Pt    0.1738    0.0366    0.5792
Pt    0.1738    0.0353    0.5361
Pt    0.1971    0.0555    0.5347
Pt    0.1990    0.0589    0.5792
Pt    0.1924    0.0549    0.6230
Pt    0.1922    0.1019    0.5351
Pt    0.1937    0.1018    0.5778
Pt    0.1919    0.0994    0.6224
Pt    0.1927    0.1446    0.5740
Pt    0.1901    0.1460    0.6204
Pt    0.1892    0.1879    0.5773
Pt    0.1886    0.1867    0.6189
Pt    0.1905    0.2310    0.5776
Pt    0.1866    0.2325    0.6226
Pt    0.1039    0.1656    0.5166
Pt    0.2407    0.0582    0.5384
Pt    0.2318    0.0987    0.6241
Pt    0.2334    0.1447    0.6216
Pt    0.2323    0.1881    0.5748
Pt    0.2328    0.1860    0.6208
Pt    0.2330    0.2285    0.5323
Pt    0.2314    0.2303    0.5768
Pt    0.2320    0.2314    0.6199
Pt    0.2142    0.1644    0.5743
Pt    0.2117    0.1226    0.6233
Pt    0.2141    0.0797    0.5366
Pt    0.2155    0.0343    0.5788
Pt    0.2189    0.0350    0.5371
Pt    0.1665    0.2552    0.6207
Pt    0.1671    0.2554    0.5790
Pt    0.1664    0.2085    0.6186
Pt    0.1683    0.2104    0.5762
Pt    0.0605    0.0357    0.5561
Pt    0.0598    0.0357    0.6010
Pt    0.0599    0.0779    0.5593
Pt    0.0577    0.0771    0.6026
Pt    0.0597    0.1208    0.5573
Pt    0.0601    0.1231    0.6018
Pt    0.0612    0.1657    0.5597
Pt    0.0590    0.1663    0.6032
Pt    0.0598    0.2102    0.5606
Pt    0.1059    0.0347    0.5579
Pt    0.1018    0.0356    0.6008
Pt    0.1056    0.0778    0.5569
Pt    0.1016    0.0782    0.6022
Pt    0.1030    0.1215    0.5587
Pt    0.1022    0.1209    0.6018
Pt    0.1041    0.1657    0.5585
Pt    0.1019    0.1672    0.6017
Pt    0.1509    0.0356    0.5575
Pt    0.1490    0.0359    0.6019
Pt    0.1504    0.0783    0.5568
Pt    0.1476    0.0801    0.6013
Pt    0.1493    0.1216    0.5560
Pt    0.1497    0.1231    0.5993
Pt    0.1485    0.1652    0.5584
Pt    0.1456    0.1667    0.5989
Pt    0.1440    0.2093    0.5991
Pt    0.1433    0.2545    0.5992
Pt    0.1959    0.0343    0.5574
Pt    0.1960    0.0375    0.5997
Pt    0.1946    0.0791    0.5568
Pt    0.1928    0.0792    0.6020
Pt    0.1917    0.1231    0.5547
Pt    0.1914    0.1228    0.5980
Pt    0.1891    0.1684    0.5544
Pt    0.1923    0.1655    0.6001
Pt    0.1893    0.2089    0.5543
Pt    0.1907    0.2091    0.6003
Pt    0.1875    0.2513    0.5579
Pt    0.1874    0.2532    0.6006
Pt    0.2424    0.0328    0.5563
Pt    0.2323    0.1231    0.6020
Pt    0.2326    0.1624    0.5983
Pt    0.2359    0.2099    0.5548
Pt    0.2325    0.2068    0.5987
Pt    0.2316    0.2509    0.5530
Pt    0.2326    0.2556    0.5995
Pt    0.1232    0.2558    0.6199
Pt    0.1249    0.2111    0.6215
Pt    0.0345    0.0582    0.5578
Pt    0.0345    0.0567    0.6042
Pt    0.0357    0.1020    0.5576
Pt    0.0368    0.1020    0.6014
Pt    0.0393    0.1452    0.5593
Pt    0.0389    0.1457    0.6025
Pt    0.0400    0.1861    0.5612
Pt    0.0398    0.1895    0.6018
Pt    0.0365    0.2330    0.5574
Pt    0.1234    0.1668    0.6219
Pt    0.1239    0.1643    0.5799
Pt    0.0823    0.0577    0.5569
Pt    0.0819    0.0578    0.6050
Pt    0.0815    0.0995    0.5556
Pt    0.0806    0.0991    0.6016
Pt    0.0821    0.1438    0.5579
Pt    0.0814    0.1451    0.6032
Pt    0.0843    0.1901    0.5602
Pt    0.0924    0.1931    0.5932
Pt    0.1255    0.1672    0.5358
Pt    0.1235    0.1212    0.6243
Pt    0.1285    0.0578    0.5575
Pt    0.1259    0.0567    0.6015
Pt    0.1269    0.1006    0.5588
Pt    0.1273    0.1004    0.6001
Pt    0.1275    0.1454    0.5559
Pt    0.1251    0.1443    0.6009
Pt    0.1374    0.1909    0.5475
Pt    0.1211    0.1895    0.5993
Pt    0.1241    0.2321    0.6012
Pt    0.1250    0.1236    0.5814
Pt    0.1265    0.1228    0.5363
Pt    0.1730    0.0559    0.5561
Pt    0.1717    0.0560    0.6006
Pt    0.1717    0.0999    0.5578
Pt    0.1724    0.0996    0.5986
Pt    0.1717    0.1449    0.5538
Pt    0.1684    0.1455    0.5998
Pt    0.1656    0.1879    0.5555
Pt    0.1660    0.1882    0.5964
Pt    0.1674    0.2324    0.6001
Pt    0.1246    0.0813    0.6226
Pt    0.2174    0.0558    0.5562
Pt    0.2119    0.1432    0.5977
Pt    0.2114    0.1857    0.5536
Pt    0.2107    0.1871    0.5975
Pt    0.2103    0.2314    0.5530
Pt    0.2102    0.2299    0.5998
Pt    0.2557    0.1428    0.5991
Pt    0.2576    0.1887    0.5546
Pt    0.2555    0.1877    0.6008
Pt    0.2543    0.2319    0.5561
Pt    0.2546    0.2307    0.5986
Pt    0.0367    0.0360    0.5380
Pt    0.0383    0.0368    0.5783
Pt    0.0358    0.0351    0.6251
Pt    0.0375    0.0797    0.5364
Pt    0.0363    0.0789    0.5795
Pt    0.0375    0.0786    0.6240
Pt    0.0383    0.1232    0.5361
Pt    0.0381    0.1236    0.5802
Pt    0.0389    0.1227    0.6250
Pt    0.0387    0.1668    0.5362
Pt    0.0362    0.1659    0.5803
Pt    0.0372    0.1656    0.6245
Pt    0.0368    0.2095    0.5382
Pt    0.0394    0.2107    0.5815
Pt    0.0385    0.2537    0.5362
Pt    0.0824    0.0359    0.5361
Pt    0.0831    0.0349    0.5782
Pt    0.0804    0.0350    0.6242
Pt    0.0824    0.0781    0.5335
Pt    0.0806    0.0781    0.5787
Pt    0.0783    0.0778    0.6252
Pt    0.0829    0.1197    0.5360
Pt    0.0788    0.1216    0.5794
Pt    0.0808    0.1221    0.6224
Pt    0.0818    0.1668    0.5383
Pt    0.0822    0.1660    0.5806
Pt    0.0791    0.1679    0.6223
Pt    0.0827    0.2092    0.5394
Pt    0.1286    0.0336    0.5363
Pt    0.1270    0.0340    0.5805
Pt    0.1262    0.0343    0.6242
Pt    0.1269    0.0778    0.5355
Pt    0.1275    0.0780    0.5806
Pt    0.0813    0.0149    0.6022
Pt    0.0172    0.1254    0.6038
Pt    0.0608    0.1672    0.5168
Pt    0.0176    0.1232    0.5561
Pt    0.0171    0.1457    0.5788
Pt    0.0164    0.1897    0.5829
Pt    0.0152    0.1040    0.5829
Pt    0.0625    0.0146    0.5797
Pt    0.1250    0.0144    0.6024
Pt    0.0189    0.1866    0.6250
Pt    0.0172    0.1008    0.6238
Pt    0.0834    0.0144    0.5574
Pt    0.0153    0.0329    0.6017
Pt    0.0151    0.1449    0.6264
Pt    0.0587    0.0156    0.5365
Pt    0.0620    0.2129    0.5155
Pt    0.1923    0.0145    0.6260
Pt    0.1966    0.0360    0.5151
Pt    0.0177    0.1451    0.5376
Pt    0.1730    0.0165    0.6034
Pt    0.0165    0.1687    0.5566
Pt    0.0403    0.2340    0.5158
Pt    0.1260    0.1902    0.5182
Pt    0.0170    0.2106    0.5614
Pt    0.2612    0.0327    0.5333
Pt    0.0159    0.1657    0.6045
Pt    0.0166    0.1875    0.5365
Pt    0.0841    0.1889    0.5181
Pt    0.1500    0.0152    0.6235
Pt    0.1725    0.0156    0.5587
Pt    0.0157    0.0578    0.5807
Pt    0.1044    0.0147    0.5351
Pt    0.0728    0.1884    0.6391
Pt    0.0154    0.1664    0.5163
Pt    0.0365    0.0574    0.5149
Pt    0.0820    0.0559    0.5163
Pt    0.1507    0.0144    0.5804
Pt    0.1708    0.0585    0.5157
Pt    0.0153    0.0999    0.5355
Pt    0.1934    0.0144    0.5361
Pt    0.1034    0.0145    0.6240
Pt    0.0596    0.0374    0.5149
Pt    0.1039    0.0802    0.5150
Pt    0.1250    0.1440    0.5150
Pt    0.0171    0.1230    0.5150
Pt    0.2533    0.2544    0.7520
Pt    0.2539    0.2543    0.7089
Pt    0.2542    0.2533    0.6650
Pt    0.2532    0.2095    0.7521
Pt    0.2557    0.2089    0.7103
Pt    0.2544    0.2107    0.6646
Pt    0.2112    0.1229    0.6668
Pt    0.2114    0.2096    0.6650
Pt    0.2509    0.0770    0.7510
Pt    0.2555    0.0782    0.7080
Pt    0.0579    0.0586    0.6652
Pt    0.0582    0.0580    0.7111
Pt    0.0585    0.0981    0.6686
Pt    0.0589    0.1422    0.6702
Pt    0.0563    0.1881    0.6689
Pt    0.0581    0.1892    0.7073
Pt    0.0595    0.1875    0.7541
Pt    0.0526    0.2335    0.7083
Pt    0.0577    0.2280    0.7536
Pt    0.2533    0.0800    0.6670
Pt    0.1026    0.0573    0.6681
Pt    0.1021    0.1010    0.6676
Pt    0.1013    0.1430    0.6665
Pt    0.0987    0.1436    0.7112
Pt    0.1004    0.1422    0.7522
Pt    0.0971    0.1885    0.6630
Pt    0.0997    0.1904    0.7074
Pt    0.1011    0.1873    0.7524
Pt    0.0971    0.2310    0.6627
Pt    0.1005    0.2324    0.7073
Pt    0.0996    0.2319    0.7550
Pt    0.2091    0.0787    0.7558
Pt    0.1459    0.0573    0.6675
Pt    0.1476    0.0988    0.6690
Pt    0.1449    0.0985    0.7129
Pt    0.1435    0.0997    0.7518
Pt    0.1454    0.1434    0.6673
Pt    0.1438    0.1436    0.7111
Pt    0.1414    0.1433    0.7534
Pt    0.1460    0.1865    0.6655
Pt    0.1447    0.1877    0.7082
Pt    0.1429    0.1871    0.7517
Pt    0.1430    0.2303    0.6642
Pt    0.1438    0.2310    0.7082
Pt    0.1454    0.2317    0.7534
Pt    0.1918    0.0573    0.6648
Pt    0.1860    0.0557    0.7106
Pt    0.1876    0.0579    0.7544
Pt    0.1905    0.0985    0.6667
Pt    0.1883    0.0999    0.7116
Pt    0.1907    0.0983    0.7528
Pt    0.1881    0.1442    0.6646
Pt    0.1878    0.1443    0.7102
Pt    0.1888    0.1440    0.7515
Pt    0.1869    0.1878    0.6646
Pt    0.1883    0.1884    0.7082
Pt    0.1876    0.1884    0.7528
Pt    0.1887    0.2306    0.6665
Pt    0.1898    0.2308    0.7087
Pt    0.1882    0.2320    0.7527
Pt    0.2097    0.1238    0.7546
Pt    0.2360    0.0544    0.7059
Pt    0.2288    0.0540    0.7549
Pt    0.2335    0.1001    0.6654
Pt    0.2349    0.0991    0.7099
Pt    0.2325    0.0983    0.7525
Pt    0.2321    0.1460    0.6666
Pt    0.2326    0.1457    0.7095
Pt    0.2320    0.1429    0.7548
Pt    0.2329    0.1861    0.6657
Pt    0.2320    0.1892    0.7107
Pt    0.2313    0.1876    0.7541
Pt    0.2327    0.2333    0.6644
Pt    0.2337    0.2322    0.7094
Pt    0.2300    0.2315    0.7532
Pt    0.2509    0.1669    0.7545
Pt    0.2538    0.1673    0.7101
Pt    0.0816    0.0151    0.6885
Pt    0.2539    0.1658    0.6655
Pt    0.2547    0.1216    0.7523
Pt    0.2539    0.1225    0.7085
Pt    0.2562    0.1226    0.6647
Pt    0.1889    0.2535    0.6436
Pt    0.2101    0.1675    0.7540
Pt    0.0588    0.0345    0.6470
Pt    0.0593    0.0377    0.6897
Pt    0.0592    0.0380    0.7331
Pt    0.0565    0.0788    0.6466
Pt    0.0621    0.0792    0.6911
Pt    0.0595    0.1216    0.6472
Pt    0.0616    0.1204    0.6922
Pt    0.0554    0.1673    0.6481
Pt    0.0596    0.1664    0.6883
Pt    0.0562    0.2119    0.6875
Pt    0.0579    0.2092    0.7297
Pt    0.0569    0.2520    0.6874
Pt    0.0569    0.2523    0.7332
Pt    0.1050    0.0343    0.6470
Pt    0.1040    0.0342    0.6880
Pt    0.1030    0.0784    0.6469
Pt    0.1050    0.0782    0.6906
Pt    0.0998    0.1210    0.6449
Pt    0.1004    0.1209    0.6897
Pt    0.1008    0.1210    0.7306
Pt    0.1007    0.1676    0.6437
Pt    0.1016    0.1670    0.6866
Pt    0.1005    0.1679    0.7303
Pt    0.0992    0.2101    0.6410
Pt    0.1002    0.2104    0.6828
Pt    0.1007    0.2105    0.7320
Pt    0.1008    0.2545    0.6429
Pt    0.0979    0.2531    0.6862
Pt    0.0974    0.2533    0.7321
Pt    0.1480    0.0361    0.6450
Pt    0.1485    0.0792    0.6443
Pt    0.1464    0.0773    0.6902
Pt    0.1461    0.1221    0.6454
Pt    0.1462    0.1200    0.6893
Pt    0.1430    0.1227    0.7335
Pt    0.1464    0.1641    0.6436
Pt    0.1423    0.1651    0.6883
Pt    0.1426    0.1640    0.7332
Pt    0.1470    0.2095    0.6413
Pt    0.1450    0.2084    0.6877
Pt    0.1434    0.2082    0.7294
Pt    0.1434    0.2508    0.6439
Pt    0.1423    0.2543    0.6881
Pt    0.1434    0.2512    0.7317
Pt    0.1927    0.0765    0.6432
Pt    0.1897    0.0750    0.6877
Pt    0.1889    0.0778    0.7320
Pt    0.1910    0.1223    0.6441
Pt    0.1867    0.1202    0.6885
Pt    0.1894    0.1211    0.7331
Pt    0.1888    0.1672    0.6417
Pt    0.1884    0.1664    0.6886
Pt    0.1873    0.1655    0.7292
Pt    0.1879    0.2086    0.6411
Pt    0.1869    0.2083    0.6867
Pt    0.1888    0.2091    0.7296
Pt    0.0378    0.0156    0.6900
Pt    0.1890    0.2534    0.6862
Pt    0.1874    0.2518    0.7323
Pt    0.2311    0.0355    0.7300
Pt    0.2317    0.0769    0.6877
Pt    0.2291    0.0777    0.7283
Pt    0.2348    0.1224    0.6436
Pt    0.2316    0.1223    0.6868
Pt    0.2318    0.1211    0.7302
Pt    0.2336    0.1659    0.6441
Pt    0.2323    0.1671    0.6872
Pt    0.2325    0.1647    0.7328
Pt    0.2330    0.2091    0.6427
Pt    0.2333    0.2114    0.6881
Pt    0.2327    0.2083    0.7313
Pt    0.2324    0.2519    0.6422
Pt    0.2337    0.2552    0.6878
Pt    0.2312    0.2525    0.7297
Pt    0.2530    0.0355    0.7520
Pt    0.2099    0.2544    0.7530
Pt    0.2108    0.1663    0.7087
Pt    0.0351    0.0563    0.6474
Pt    0.0365    0.0576    0.6886
Pt    0.0378    0.0609    0.7321
Pt    0.0344    0.1011    0.6494
Pt    0.0376    0.1008    0.6911
Pt    0.0381    0.1432    0.6471
Pt    0.0359    0.2281    0.7328
Pt    0.2098    0.2525    0.7079
Pt    0.2109    0.2549    0.6669
Pt    0.0830    0.0563    0.6432
Pt    0.0827    0.0575    0.6896
Pt    0.0808    0.1006    0.6465
Pt    0.0815    0.0996    0.6935
Pt    0.0790    0.1442    0.6446
Pt    0.0815    0.1447    0.6870
Pt    0.1510    0.0159    0.6677
Pt    0.0802    0.1881    0.6858
Pt    0.0766    0.1874    0.7314
Pt    0.0775    0.2305    0.6837
Pt    0.0785    0.2312    0.7288
Pt    0.2084    0.2089    0.7541
Pt    0.2104    0.2105    0.7076
Pt    0.1270    0.0593    0.6446
Pt    0.1247    0.0555    0.6892
Pt    0.1249    0.0992    0.6454
Pt    0.1234    0.1007    0.6907
Pt    0.1230    0.1012    0.7321
Pt    0.1221    0.1410    0.6451
Pt    0.1224    0.1420    0.6893
Pt    0.1207    0.1446    0.7324
Pt    0.1241    0.1873    0.6431
Pt    0.1223    0.1874    0.6833
Pt    0.1231    0.1891    0.7293
Pt    0.1215    0.2322    0.6447
Pt    0.1220    0.2322    0.6842
Pt    0.1206    0.2312    0.7330
Pt    0.2095    0.1216    0.7093
Pt    0.1688    0.0562    0.6450
Pt    0.1667    0.0554    0.6878
Pt    0.1701    0.0991    0.6448
Pt    0.1692    0.0973    0.6903
Pt    0.1673    0.1000    0.7318
Pt    0.1680    0.1440    0.6426
Pt    0.1679    0.1438    0.6863
Pt    0.1654    0.1438    0.7313
Pt    0.1660    0.1872    0.6417
Pt    0.1650    0.1849    0.6877
Pt    0.1644    0.1874    0.7294
Pt    0.1683    0.2320    0.6444
Pt    0.1661    0.2305    0.6886
Pt    0.1668    0.2311    0.7334
Pt    0.2149    0.0527    0.6835
Pt    0.2094    0.0541    0.7345
Pt    0.2106    0.0993    0.6446
Pt    0.2109    0.0987    0.6879
Pt    0.2102    0.0997    0.7313
Pt    0.2105    0.1464    0.6447
Pt    0.2096    0.1446    0.6881
Pt    0.2110    0.1434    0.7318
Pt    0.2121    0.1882    0.6440
Pt    0.2113    0.1896    0.6868
Pt    0.2084    0.1884    0.7305
Pt    0.2096    0.2319    0.6436
Pt    0.2119    0.2333    0.6870
Pt    0.2106    0.2298    0.7322
Pt    0.2093    0.1678    0.6671
Pt    0.2584    0.0576    0.6841
Pt    0.2515    0.0561    0.7301
Pt    0.0159    0.1648    0.6486
Pt    0.2568    0.1008    0.6869
Pt    0.2556    0.0995    0.7292
Pt    0.2549    0.1458    0.6437
Pt    0.2539    0.1423    0.6854
Pt    0.2530    0.1437    0.7303
Pt    0.2542    0.1886    0.6427
Pt    0.2540    0.1887    0.6885
Pt    0.2535    0.1877    0.7321
Pt    0.2545    0.2306    0.6433
Pt    0.2552    0.2326    0.6861
Pt    0.2549    0.2314    0.7316
Pt    0.0366    0.0341    0.6684
Pt    0.0377    0.0368    0.7119
Pt    0.0386    0.0377    0.7551
Pt    0.0359    0.0789    0.6693
Pt    0.0369    0.0824    0.7109
Pt    0.0384    0.1215    0.6697
Pt    0.0363    0.1633    0.6691
Pt    0.0365    0.2092    0.7094
Pt    0.0364    0.2510    0.7528
Pt    0.0815    0.0381    0.6670
Pt    0.0811    0.0380    0.7119
Pt    0.0810    0.0783    0.6664
Pt    0.0821    0.1223    0.6671
Pt    0.0784    0.1651    0.6653
Pt    0.0794    0.1675    0.7088
Pt    0.0793    0.1633    0.7517
Pt    0.0744    0.2106    0.6609
Pt    0.0791    0.2120    0.7063
Pt    0.0802    0.2093    0.7535
Pt    0.0778    0.2526    0.6645
Pt    0.0782    0.2535    0.7091
Pt    0.0768    0.2520    0.7567
Pt    0.1272    0.0346    0.6685
Pt    0.1239    0.0794    0.6684
Pt    0.1243    0.1201    0.6685
Pt    0.1235    0.1219    0.7104
Pt    0.1204    0.1208    0.7539
Pt    0.1230    0.1638    0.6641
Pt    0.1216    0.1661    0.7093
Pt    0.1197    0.1670    0.7539
Pt    0.1219    0.2099    0.6629
Pt    0.1214    0.2107    0.7085
Pt    0.1234    0.2102    0.7535
Pt    0.1207    0.2539    0.6654
Pt    0.1236    0.2521    0.7115
Pt    0.1219    0.2554    0.7531
Pt    0.1706    0.0366    0.6649
Pt    0.1687    0.0776    0.6662
Pt    0.1655    0.0776    0.7136
Pt    0.1662    0.0791    0.7524
Pt    0.1681    0.1203    0.6663
Pt    0.1670    0.1217    0.7104
Pt    0.1656    0.1219    0.7534
Pt    0.1669    0.1647    0.6640
Pt    0.1641    0.1652    0.7108
Pt    0.1667    0.1668    0.7532
Pt    0.1655    0.2092    0.6640
Pt    0.1668    0.2097    0.7105
Pt    0.1670    0.2078    0.7548
Pt    0.1665    0.2527    0.6660
Pt    0.1658    0.2513    0.7090
Pt    0.1647    0.2538    0.7527
Pt    0.2084    0.0383    0.7090
Pt    0.2110    0.0790    0.6659
Pt    0.2106    0.0727    0.7083
Pt    0.0152    0.1248    0.6496
Pt    0.0159    0.0585    0.7120
Pt    0.0163    0.2286    0.7545
Pt    0.2543    0.0992    0.6445
Pt    0.0155    0.0365    0.6900
Pt    0.0601    0.0160    0.7105
Pt    0.2296    0.0148    0.7523
Pt    0.0177    0.1219    0.6907
Pt    0.0382    0.0154    0.7368
Pt    0.0162    0.0370    0.7324
Pt    0.0823    0.0154    0.6458
Pt    0.0151    0.2506    0.7301
Pt    0.1273    0.0150    0.6455
Pt    0.2551    0.2541    0.8861
Pt    0.2546    0.2532    0.8420
Pt    0.2526    0.2530    0.7981
Pt    0.2538    0.0757    0.7982
Pt    0.2520    0.2084    0.8847
Pt    0.2512    0.0338    0.7942
Pt    0.2115    0.1632    0.7973
Pt    0.2527    0.2090    0.8445
Pt    0.2114    0.1228    0.8840
Pt    0.2535    0.2119    0.7973
Pt    0.0177    0.0799    0.8180
Pt    0.2565    0.1671    0.7969
Pt    0.2117    0.2097    0.8414
Pt    0.0633    0.0605    0.7932
Pt    0.0618    0.0572    0.8391
Pt    0.0573    0.0566    0.8834
Pt    0.0596    0.1046    0.8386
Pt    0.0587    0.1025    0.8828
Pt    0.0596    0.1456    0.8837
Pt    0.0572    0.2311    0.8002
Pt    0.2105    0.1220    0.7956
Pt    0.1641    0.1667    0.8847
Pt    0.1072    0.0579    0.8387
Pt    0.1021    0.0564    0.8836
Pt    0.1038    0.1021    0.7985
Pt    0.1022    0.1003    0.8417
Pt    0.1013    0.0998    0.8825
Pt    0.0992    0.1405    0.7952
Pt    0.1012    0.1444    0.8406
Pt    0.1012    0.1455    0.8833
Pt    0.1002    0.1888    0.7962
Pt    0.0988    0.1862    0.8396
Pt    0.1028    0.1886    0.8834
Pt    0.1002    0.2301    0.7981
Pt    0.1016    0.2318    0.8405
Pt    0.1026    0.2305    0.8838
Pt    0.2087    0.0780    0.8410
Pt    0.1451    0.0566    0.8845
Pt    0.1457    0.0996    0.7964
Pt    0.1475    0.1024    0.8419
Pt    0.1463    0.1005    0.8844
Pt    0.1465    0.1446    0.7954
Pt    0.1458    0.1442    0.8392
Pt    0.1444    0.1443    0.8841
Pt    0.1442    0.1874    0.7973
Pt    0.1487    0.1875    0.8406
Pt    0.1444    0.1898    0.8831
Pt    0.1436    0.2298    0.7976
Pt    0.1449    0.2318    0.8422
Pt    0.1470    0.2340    0.8864
Pt    0.1908    0.0987    0.7951
Pt    0.1889    0.1018    0.8394
Pt    0.1891    0.0994    0.8848
Pt    0.1863    0.1439    0.7959
Pt    0.1932    0.1436    0.8421
Pt    0.1891    0.1454    0.8838
Pt    0.1887    0.1882    0.7984
Pt    0.1898    0.1875    0.8411
Pt    0.1881    0.1857    0.8862
Pt    0.1893    0.2307    0.7994
Pt    0.1870    0.2316    0.8419
Pt    0.2529    0.0156    0.7739
Pt    0.2549    0.1205    0.8410
Pt    0.2315    0.0566    0.7950
Pt    0.2344    0.0990    0.7974
Pt    0.2314    0.0997    0.8415
Pt    0.2294    0.0159    0.7989
Pt    0.2325    0.1435    0.7990
Pt    0.2329    0.1430    0.8410
Pt    0.2344    0.1443    0.8866
Pt    0.2341    0.1869    0.7984
Pt    0.2328    0.1873    0.8427
Pt    0.2319    0.1875    0.8877
Pt    0.2325    0.2317    0.7943
Pt    0.2311    0.2317    0.8424
Pt    0.2308    0.2308    0.8862
Pt    0.1702    0.2539    0.8867
Pt    0.1896    0.2300    0.8885
Pt    0.2545    0.1657    0.8878
Pt    0.2099    0.2527    0.8416
Pt    0.2097    0.2537    0.7966
Pt    0.2523    0.1641    0.8426
Pt    0.2121    0.1233    0.8430
Pt    0.2522    0.1188    0.8858
Pt    0.0604    0.0384    0.7749
Pt    0.0613    0.0387    0.8138
Pt    0.0594    0.0350    0.8614
Pt    0.0613    0.0796    0.8188
Pt    0.0611    0.0826    0.8597
Pt    0.0603    0.1252    0.8616
Pt    0.0589    0.1677    0.8621
Pt    0.0562    0.2068    0.7766
Pt    0.0558    0.2527    0.7778
Pt    0.0591    0.2544    0.8214
Pt    0.1046    0.0336    0.8173
Pt    0.1042    0.0361    0.8601
Pt    0.1077    0.0788    0.8182
Pt    0.1027    0.0770    0.8620
Pt    0.1012    0.1236    0.8201
Pt    0.1039    0.1217    0.8602
Pt    0.0985    0.1641    0.7767
Pt    0.1001    0.1664    0.8175
Pt    0.1004    0.1667    0.8609
Pt    0.1001    0.2100    0.7762
Pt    0.1005    0.2090    0.8196
Pt    0.0999    0.2109    0.8630
Pt    0.0990    0.2521    0.7768
Pt    0.1017    0.2559    0.8197
Pt    0.1041    0.2539    0.8649
Pt    0.1481    0.0356    0.8620
Pt    0.1486    0.0801    0.8625
Pt    0.1459    0.1209    0.7746
Pt    0.1460    0.1237    0.8184
Pt    0.1465    0.1247    0.8627
Pt    0.1430    0.1660    0.7742
Pt    0.1445    0.1650    0.8182
Pt    0.1449    0.1648    0.8634
Pt    0.1457    0.2092    0.7744
Pt    0.1449    0.2096    0.8208
Pt    0.1451    0.2105    0.8601
Pt    0.1445    0.2524    0.7747
Pt    0.1436    0.2531    0.8186
Pt    0.1456    0.2559    0.8634
Pt    0.1852    0.0771    0.7766
Pt    0.1884    0.0787    0.8183
Pt    0.1879    0.0790    0.8617
Pt    0.1871    0.1201    0.7747
Pt    0.1912    0.1226    0.8185
Pt    0.1891    0.1222    0.8635
Pt    0.1869    0.1642    0.7747
Pt    0.1906    0.1659    0.8202
Pt    0.1891    0.1667    0.8631
Pt    0.1890    0.2114    0.7776
Pt    0.1903    0.2074    0.8199
Pt    0.1887    0.2104    0.8644
Pt    0.1865    0.2529    0.7737
Pt    0.1879    0.2527    0.8205
Pt    0.1893    0.2537    0.8642
Pt    0.2278    0.0332    0.7750
Pt    0.2320    0.0777    0.7761
Pt    0.2331    0.0765    0.8204
Pt    0.2324    0.1210    0.7772
Pt    0.2317    0.1202    0.8197
Pt    0.2329    0.1218    0.8645
Pt    0.2310    0.1628    0.7769
Pt    0.2327    0.1669    0.8200
Pt    0.2321    0.1671    0.8649
Pt    0.2313    0.2098    0.7726
Pt    0.2327    0.2100    0.8198
Pt    0.2302    0.2094    0.8631
Pt    0.2321    0.2543    0.7753
Pt    0.2314    0.2548    0.8228
Pt    0.2321    0.2522    0.8640
Pt    0.1661    0.2542    0.8392
Pt    0.2114    0.2104    0.7980
Pt    0.2543    0.1231    0.7984
Pt    0.0401    0.0593    0.7750
Pt    0.0404    0.0602    0.8169
Pt    0.0386    0.0595    0.8619
Pt    0.0398    0.1024    0.8118
Pt    0.0398    0.1023    0.8627
Pt    0.0393    0.1447    0.8568
Pt    0.0370    0.2302    0.7761
Pt    0.2110    0.1663    0.8852
Pt    0.2118    0.1660    0.8433
Pt    0.0854    0.0564    0.8187
Pt    0.0816    0.0570    0.8609
Pt    0.0821    0.1012    0.8203
Pt    0.0811    0.1023    0.8617
Pt    0.0814    0.1453    0.8619
Pt    0.0784    0.1866    0.7770
Pt    0.0772    0.1866    0.8170
Pt    0.0792    0.1884    0.8618
Pt    0.0775    0.2307    0.7782
Pt    0.0776    0.2313    0.8225
Pt    0.2545    0.0770    0.8428
Pt    0.1273    0.0565    0.8596
Pt    0.1257    0.0992    0.8195
Pt    0.1246    0.1010    0.8620
Pt    0.1209    0.1434    0.7752
Pt    0.1217    0.1455    0.8168
Pt    0.1230    0.1453    0.8643
Pt    0.1211    0.1870    0.7770
Pt    0.1238    0.1864    0.8194
Pt    0.1231    0.1886    0.8615
Pt    0.1231    0.2288    0.7753
Pt    0.1223    0.2317    0.8201
Pt    0.1247    0.2302    0.8618
Pt    0.2121    0.0796    0.7949
Pt    0.1674    0.0581    0.8608
Pt    0.1661    0.0989    0.7730
Pt    0.1660    0.0973    0.8169
Pt    0.1690    0.1026    0.8631
Pt    0.1668    0.1427    0.7728
Pt    0.1695    0.1447    0.8192
Pt    0.1684    0.1452    0.8623
Pt    0.1671    0.1853    0.7786
Pt    0.1668    0.1869    0.8189
Pt    0.1661    0.1881    0.8628
Pt    0.1668    0.2312    0.7759
Pt    0.1663    0.2304    0.8179
Pt    0.1676    0.2329    0.8654
Pt    0.2060    0.0564    0.7761
Pt    0.2113    0.1007    0.7741
Pt    0.2101    0.0995    0.8195
Pt    0.2100    0.0964    0.8631
Pt    0.2081    0.1431    0.7744
Pt    0.2133    0.1439    0.8200
Pt    0.2135    0.1442    0.8658
Pt    0.2117    0.1884    0.7778
Pt    0.2116    0.1888    0.8216
Pt    0.2091    0.1904    0.8640
Pt    0.2097    0.2331    0.7748
Pt    0.2117    0.2319    0.8187
Pt    0.2092    0.2318    0.8639
Pt    0.1653    0.2519    0.7962
Pt    0.2538    0.0587    0.7739
Pt    0.2534    0.0532    0.8182
Pt    0.2544    0.1001    0.7754
Pt    0.2541    0.1000    0.8195
Pt    0.2495    0.0972    0.8677
Pt    0.2546    0.1422    0.7747
Pt    0.2543    0.1427    0.8204
Pt    0.2526    0.1433    0.8634
Pt    0.2545    0.1892    0.7750
Pt    0.2537    0.1870    0.8214
Pt    0.2547    0.1844    0.8644
Pt    0.2536    0.2296    0.7730
Pt    0.2528    0.2321    0.8203
Pt    0.2542    0.2319    0.8642
Pt    0.0375    0.0367    0.7937
Pt    0.0384    0.0359    0.8373
Pt    0.0355    0.0364    0.8845
Pt    0.0402    0.0808    0.7935
Pt    0.0386    0.0835    0.8381
Pt    0.0377    0.0797    0.8840
Pt    0.0376    0.1243    0.8389
Pt    0.0372    0.1264    0.8807
Pt    0.0390    0.1698    0.8849
Pt    0.0346    0.2519    0.8000
Pt    0.0819    0.0364    0.7934
Pt    0.0829    0.0361    0.8395
Pt    0.0811    0.0353    0.8833
Pt    0.0841    0.0790    0.7985
Pt    0.0839    0.0783    0.8398
Pt    0.0805    0.0795    0.8834
Pt    0.0752    0.1302    0.8358
Pt    0.0794    0.1234    0.8842
Pt    0.0778    0.1654    0.8374
Pt    0.0805    0.1686    0.8843
Pt    0.0770    0.2107    0.7976
Pt    0.0786    0.2087    0.8397
Pt    0.0773    0.2527    0.7979
Pt    0.0795    0.2517    0.8433
Pt    0.1263    0.0334    0.8388
Pt    0.1230    0.0345    0.8852
Pt    0.1297    0.0781    0.8388
Pt    0.1243    0.0775    0.8821
Pt    0.1247    0.1232    0.7961
Pt    0.1245    0.1210    0.8381
Pt    0.1245    0.1232    0.8850
Pt    0.1215    0.1658    0.7958
Pt    0.1235    0.1660    0.8400
Pt    0.1245    0.1684    0.8858
Pt    0.1234    0.2088    0.7979
Pt    0.1202    0.2079    0.8416
Pt    0.1249    0.2107    0.8834
Pt    0.1212    0.2525    0.7972
Pt    0.1241    0.2541    0.8414
Pt    0.1241    0.2569    0.8876
Pt    0.1673    0.0368    0.8872
Pt    0.1669    0.0800    0.8395
Pt    0.1687    0.0795    0.8850
Pt    0.1667    0.1202    0.7979
Pt    0.1692    0.1234    0.8397
Pt    0.1668    0.1212    0.8855
Pt    0.1667    0.1660    0.7983
Pt    0.1690    0.1663    0.8394
Pt    0.2281    0.0955    0.8853
Pt    0.1677    0.2085    0.7984
Pt    0.1685    0.2092    0.8418
Pt    0.1665    0.2097    0.8850
Pt    0.2100    0.2089    0.8881
Pt    0.0597    0.0149    0.8403
Pt    0.2096    0.2532    0.8874
Pt    0.0176    0.0608    0.7954
Pt    0.0150    0.1457    0.8848
Pt    0.0820    0.0149    0.8175
Pt    0.0161    0.1027    0.8841
Pt    0.0619    0.0150    0.7950
Pt    0.0160    0.0158    0.8371
Pt    0.0161    0.0799    0.8621
Pt    0.0373    0.0165    0.8621
Pt    0.0166    0.2295    0.7978
Pt    0.0166    0.0588    0.8832
Pt    0.0171    0.0599    0.8381
Pt    0.0160    0.2513    0.7754
Pt    0.0180    0.0148    0.7930
Pt    0.0185    0.1665    0.8654
Pt    0.0170    0.1243    0.8594
Pt    0.0162    0.1020    0.8370
Pt    0.0167    0.0374    0.8157
Pt    0.2550    0.2529    0.9744
Pt    0.2537    0.2554    0.9288
Pt    0.0813    0.1254    0.9725
Pt    0.0813    0.1239    0.9278
Pt    0.0152    0.1266    0.9936
Pt    0.0815    0.0811    0.9715
Pt    0.2539    0.2104    0.9727
Pt    0.0156    0.0357    0.9073
Pt    0.0814    0.1683    0.9712
Pt    0.2538    0.2098    0.9287
Pt    0.0813    0.0800    0.9302
Pt    0.0801    0.1703    0.9282
Pt    0.0810    0.0383    0.9713
Pt    0.0602    0.0587    0.9288
Pt    0.0590    0.0592    0.9719
Pt    0.0612    0.1033    0.9288
Pt    0.0578    0.1035    0.9724
Pt    0.0591    0.1458    0.9270
Pt    0.0594    0.1453    0.9725
Pt    0.0582    0.1913    0.9282
Pt    0.0580    0.1908    0.9717
Pt    0.0603    0.2377    0.9719
Pt    0.2124    0.0380    0.0128
Pt    0.1244    0.1705    0.9732
Pt    0.1040    0.0588    0.9283
Pt    0.1037    0.0591    0.9726
Pt    0.1025    0.1019    0.9258
Pt    0.1035    0.1011    0.9723
Pt    0.1003    0.1460    0.9278
Pt    0.1039    0.1465    0.9728
Pt    0.1010    0.1897    0.9308
Pt    0.1007    0.1930    0.9737
Pt    0.1026    0.2301    0.9283
Pt    0.2111    0.0369    0.9263
Pt    0.1234    0.1669    0.9300
Pt    0.1465    0.0590    0.9295
Pt    0.1476    0.0598    0.9717
Pt    0.1459    0.1017    0.9281
Pt    0.1481    0.1029    0.9733
Pt    0.1458    0.1454    0.9285
Pt    0.1456    0.1474    0.9724
Pt    0.1436    0.1874    0.9276
Pt    0.1454    0.2296    0.9306
Pt    0.0810    0.0362    0.9281
Pt    0.1662    0.2535    0.9310
Pt    0.1898    0.0585    0.9284
Pt    0.1911    0.0583    0.9695
Pt    0.1903    0.1031    0.9304
Pt    0.1928    0.1029    0.9732
Pt    0.1882    0.1465    0.9279
Pt    0.1895    0.1864    0.9313
Pt    0.1880    0.2315    0.9314
Pt    0.1243    0.1256    0.9730
Pt    0.2337    0.0581    0.9707
Pt    0.2318    0.1024    0.9278
Pt    0.2329    0.1448    0.9315
Pt    0.2325    0.1854    0.9291
Pt    0.2331    0.2297    0.9296
Pt    0.2337    0.2311    0.9717
Pt    0.2539    0.1659    0.9297
Pt    0.2541    0.0381    0.9705
Pt    0.2125    0.2534    0.9747
Pt    0.2106    0.2550    0.9325
Pt    0.1237    0.1235    0.9285
Pt    0.2116    0.2089    0.9307
Pt    0.2111    0.1666    0.9296
Pt    0.2089    0.1237    0.9295
Pt    0.2151    0.0818    0.9697
Pt    0.2111    0.0816    0.9268
Pt    0.0376    0.2573    0.9719
Pt    0.2122    0.0360    0.9730
Pt    0.1257    0.0811    0.9723
Pt    0.1238    0.0802    0.9292
Pt    0.0387    0.0156    0.9939
Pt    0.0613    0.0342    0.9049
Pt    0.0590    0.0354    0.9495
Pt    0.0604    0.0372    0.9948
Pt    0.0596    0.0811    0.9059
Pt    0.0598    0.0811    0.9517
Pt    0.0581    0.0814    0.9935
Pt    0.0584    0.1246    0.9054
Pt    0.0594    0.1258    0.9484
Pt    0.0584    0.1260    0.9961
Pt    0.0575    0.1683    0.9068
Pt    0.0593    0.1680    0.9502
Pt    0.0589    0.1711    0.9927
Pt    0.0589    0.2150    0.9513
Pt    0.0589    0.2126    0.9958
Pt    0.0599    0.2557    0.9968
Pt    0.1020    0.0359    0.9071
Pt    0.1044    0.0362    0.9515
Pt    0.1027    0.0372    0.9944
Pt    0.1022    0.0802    0.9043
Pt    0.1036    0.0806    0.9496
Pt    0.1037    0.0815    0.9946
Pt    0.1017    0.1228    0.9054
Pt    0.1011    0.1231    0.9500
Pt    0.1024    0.1258    0.9946
Pt    0.0998    0.1685    0.9080
Pt    0.1013    0.1700    0.9514
Pt    0.1041    0.1705    0.9945
Pt    0.1031    0.2098    0.9068
Pt    0.1026    0.2145    0.9514
Pt    0.1010    0.2118    0.9945
Pt    0.1463    0.0353    0.9078
Pt    0.1471    0.0356    0.9527
Pt    0.1472    0.0371    0.9952
Pt    0.1454    0.0795    0.9061
Pt    0.1478    0.0815    0.9502
Pt    0.1482    0.0808    0.9951
Pt    0.1449    0.1233    0.9075
Pt    0.1460    0.1243    0.9522
Pt    0.1483    0.1247    0.9942
Pt    0.1452    0.1654    0.9075
Pt    0.1457    0.1699    0.9510
Pt    0.1462    0.1719    0.9916
Pt    0.1444    0.2085    0.9063
Pt    0.1446    0.2554    0.9077
Pt    0.1908    0.0405    0.9061
Pt    0.1916    0.0368    0.9498
Pt    0.1884    0.0352    0.9939
Pt    0.1921    0.0781    0.9065
Pt    0.1921    0.0802    0.9509
Pt    0.1906    0.0800    0.9941
Pt    0.1891    0.1222    0.9070
Pt    0.1891    0.1260    0.9499
Pt    0.1919    0.1213    0.9947
Pt    0.1876    0.1656    0.9064
Pt    0.1919    0.1675    0.9530
Pt    0.1880    0.2096    0.9079
Pt    0.1915    0.2096    0.9507
Pt    0.1890    0.2521    0.9105
Pt    0.1859    0.2528    0.9510
Pt    0.2331    0.0359    0.9493
Pt    0.2334    0.0366    0.9921
Pt    0.2337    0.0812    0.9480
Pt    0.2311    0.0800    0.9944
Pt    0.2329    0.1233    0.9081
Pt    0.2331    0.1662    0.9082
Pt    0.2325    0.2093    0.9084
Pt    0.2323    0.2094    0.9540
Pt    0.2312    0.2530    0.9079
Pt    0.2347    0.2545    0.9521
Pt    0.2329    0.2514    0.9938
Pt    0.1679    0.2085    0.9308
Pt    0.1679    0.1685    0.9703
Pt    0.1668    0.1654    0.9274
Pt    0.0372    0.0573    0.9068
Pt    0.0382    0.0584    0.9501
Pt    0.0358    0.0579    0.9944
Pt    0.0370    0.1030    0.9059
Pt    0.0386    0.1020    0.9489
Pt    0.0359    0.1043    0.9942
Pt    0.0366    0.1472    0.9054
Pt    0.0371    0.1463    0.9509
Pt    0.0384    0.1473    0.9956
Pt    0.0360    0.1896    0.9062
Pt    0.0382    0.1908    0.9511
Pt    0.0368    0.1903    0.9954
Pt    0.0377    0.2348    0.9533
Pt    0.0350    0.2338    0.9943
Pt    0.1697    0.1233    0.9720
Pt    0.1241    0.0373    0.9732
Pt    0.1679    0.1242    0.9272
Pt    0.0788    0.0575    0.9050
Pt    0.0832    0.0585    0.9507
Pt    0.0805    0.0595    0.9933
Pt    0.0798    0.1032    0.9047
Pt    0.0811    0.1012    0.9512
Pt    0.0803    0.1031    0.9930
Pt    0.0810    0.1460    0.9051
Pt    0.0810    0.1469    0.9480
Pt    0.0805    0.1467    0.9938
Pt    0.0785    0.1917    0.9032
Pt    0.0804    0.1926    0.9509
Pt    0.0808    0.1909    0.9940
Pt    0.0811    0.2336    0.9518
Pt    0.0802    0.2343    0.9959
Pt    0.1695    0.0795    0.9727
Pt    0.1697    0.0798    0.9292
Pt    0.1690    0.0366    0.9710
Pt    0.1238    0.0580    0.9072
Pt    0.1258    0.0582    0.9506
Pt    0.1250    0.0597    0.9930
Pt    0.1254    0.1007    0.9058
Pt    0.1244    0.1022    0.9514
Pt    0.1258    0.1026    0.9947
Pt    0.1238    0.1450    0.9061
Pt    0.1226    0.1464    0.9483
Pt    0.1261    0.1486    0.9953
Pt    0.1226    0.1883    0.9077
Pt    0.1249    0.1922    0.9523
Pt    0.1233    0.1944    0.9930
Pt    0.1246    0.2317    0.9048
Pt    0.1695    0.0378    0.9282
Pt    0.1256    0.0350    0.9288
Pt    0.1246    0.2101    0.9295
Pt    0.1683    0.0610    0.9063
Pt    0.1691    0.0583    0.9502
Pt    0.1699    0.0586    0.9928
Pt    0.1685    0.1007    0.9083
Pt    0.1685    0.1028    0.9504
Pt    0.1689    0.1022    0.9940
Pt    0.1668    0.1429    0.9045
Pt    0.1658    0.1472    0.9510
Pt    0.1688    0.1490    0.9932
Pt    0.1653    0.1880    0.9054
Pt    0.1644    0.1929    0.9528
Pt    0.1666    0.2308    0.9105
Pt    0.0809    0.2127    0.9737
Pt    0.0784    0.2123    0.9288
Pt    0.2138    0.0589    0.9477
Pt    0.2116    0.0586    0.9925
Pt    0.2113    0.1033    0.9063
Pt    0.2142    0.1059    0.9508
Pt    0.2121    0.1017    0.9963
Pt    0.2096    0.1447    0.9079
Pt    0.2108    0.1864    0.9096
Pt    0.2131    0.1881    0.9509
Pt    0.2098    0.2322    0.9128
Pt    0.2098    0.2329    0.9535
Pt    0.0152    0.1232    0.9056
Pt    0.2538    0.0596    0.9948
Pt    0.2558    0.1414    0.9110
Pt    0.2545    0.1872    0.9078
Pt    0.2550    0.1849    0.9503
Pt    0.2537    0.2312    0.9066
Pt    0.2551    0.2326    0.9498
Pt    0.2566    0.2305    0.9941
Pt    0.0399    0.0373    0.9291
Pt    0.0379    0.0367    0.9743
Pt    0.0390    0.0797    0.9281
Pt    0.0377    0.0811    0.9728
Pt    0.0368    0.1252    0.9256
Pt    0.0377    0.1251    0.9710
Pt    0.0369    0.1688    0.9286
Pt    0.0381    0.1686    0.9717
Pt    0.0380    0.2131    0.9300
Pt    0.0379    0.2133    0.9739
Pt    0.1899    0.0165    0.9278
Pt    0.0161    0.1015    0.9306
Pt    0.0156    0.1687    0.9510
Pt    0.1034    0.1488    0.0144
Pt    0.2318    0.2308    0.0147
Pt    0.0807    0.0157    0.9933
Pt    0.0161    0.1467    0.9290
Pt    0.1036    0.0150    0.9297
Pt    0.1252    0.0151    0.9943
Pt    0.0163    0.1682    0.9933
Pt    0.0156    0.0793    0.9507
Pt    0.1024    0.0147    0.9720
Pt    0.0160    0.1459    0.9729
Pt    0.1270    0.0154    0.9504
Pt    0.0155    0.1244    0.9497
Pt    0.0171    0.1912    0.9283
Pt    0.0172    0.0381    0.9530
Pt    0.2554    0.2513    0.0146
Pt    0.0157    0.1672    0.9074
Pt    0.0164    0.0368    0.9932
Pt    0.0155    0.1020    0.9704
Pt    0.0591    0.0592    0.0138
Pt    0.0181    0.2130    0.9512
Pt    0.0181    0.0797    0.9076
Pt    0.0166    0.0600    0.9740
Pt    0.0171    0.1906    0.9713
Pt    0.2342    0.0158    0.0132
Pt    0.0609    0.0158    0.9715
Pt    0.2116    0.0168    0.9509
Pt    0.1690    0.0158    0.9496
Pt    0.0816    0.0158    0.9503
Pt    0.1898    0.0143    0.9719
Pt    0.1464    0.1041    0.0146
Pt    0.1263    0.1251    0.0147
Pt    0.1023    0.0585    0.0137
Pt    0.2349    0.0146    0.9710
Pt    0.2557    0.0145    0.9897
Pt    0.0349    0.0807    0.0146
Pt    0.1262    0.0367    0.0148
Pt    0.0377    0.2121    0.0148
Pt    0.2115    0.4270    0.1001
Pt    0.2525    0.3823    0.0992
Pt    0.1922    0.4493    0.0181
Pt    0.2533    0.3415    0.1017
Pt    0.0154    0.3578    0.0998
Pt    0.1666    0.4239    0.0570
Pt    0.2547    0.2978    0.1018
Pt    0.0400    0.4696    0.0608
Pt    0.0390    0.3370    0.1032
Pt    0.2542    0.3008    0.0573
Pt    0.0170    0.4931    0.0574
Pt    0.0160    0.3589    0.0587
Pt    0.2114    0.4252    0.0571
Pt    0.0378    0.3360    0.0579
Pt    0.0380    0.3817    0.0588
Pt    0.0807    0.3365    0.1001
Pt    0.0590    0.3154    0.0604
Pt    0.0615    0.3142    0.1024
Pt    0.2539    0.4921    0.0419
Pt    0.0586    0.3589    0.0572
Pt    0.0596    0.3578    0.1023
Pt    0.1241    0.4686    0.1034
Pt    0.0576    0.4040    0.0572
Pt    0.0605    0.4005    0.1014
Pt    0.0810    0.2945    0.0571
Pt    0.0614    0.4462    0.0585
Pt    0.0589    0.4479    0.1028
Pt    0.1238    0.3811    0.1018
Pt    0.0597    0.4911    0.0584
Pt    0.0611    0.4933    0.1037
Pt    0.1035    0.3151    0.0590
Pt    0.1017    0.3151    0.1037
Pt    0.1683    0.2957    0.0987
Pt    0.1023    0.3578    0.0573
Pt    0.1039    0.3578    0.1025
Pt    0.0805    0.3355    0.0579
Pt    0.1001    0.4014    0.0610
Pt    0.1034    0.4030    0.1011
Pt    0.0387    0.2716    0.0396
Pt    0.1031    0.4459    0.0596
Pt    0.1039    0.4472    0.1018
Pt    0.2343    0.5140    0.0389
Pt    0.1036    0.4912    0.0596
Pt    0.1029    0.4918    0.1040
Pt    0.1454    0.2747    0.1014
Pt    0.1445    0.3139    0.1002
Pt    0.2118    0.3860    0.1024
Pt    0.1483    0.3576    0.0564
Pt    0.1450    0.3600    0.1010
Pt    0.0179    0.3368    0.0371
Pt    0.1438    0.4012    0.0572
Pt    0.1471    0.4040    0.1007
Pt    0.0155    0.4266    0.0360
Pt    0.1463    0.4475    0.0566
Pt    0.1469    0.4490    0.1030
Pt    0.2562    0.4042    0.1223
Pt    0.1463    0.4895    0.0586
Pt    0.1462    0.4872    0.1030
Pt    0.1888    0.2751    0.0991
Pt    0.1875    0.3182    0.0991
Pt    0.1905    0.3610    0.1006
Pt    0.1694    0.4698    0.1026
Pt    0.1890    0.4029    0.0584
Pt    0.1893    0.4037    0.1011
Pt    0.1267    0.4695    0.0569
Pt    0.1865    0.4473    0.0593
Pt    0.1910    0.4475    0.0999
Pt    0.1227    0.3814    0.0152
Pt    0.1899    0.4918    0.0619
Pt    0.1931    0.4929    0.1069
Pt    0.2120    0.3411    0.1013
Pt    0.2317    0.2762    0.0572
Pt    0.2334    0.2767    0.0987
Pt    0.2323    0.3191    0.1018
Pt    0.2317    0.3626    0.0976
Pt    0.2330    0.4044    0.1027
Pt    0.2323    0.4489    0.0613
Pt    0.2115    0.2964    0.1007
Pt    0.2363    0.4931    0.0644
Pt    0.1250    0.5133    0.0595
Pt    0.2548    0.3632    0.1228
Pt    0.0380    0.4251    0.1020
Pt    0.2530    0.2743    0.1217
Pt    0.1221    0.4240    0.0578
Pt    0.1687    0.4696    0.0587
Pt    0.1681    0.3804    0.1021
Pt    0.0816    0.4697    0.1052
Pt    0.1191    0.2922    0.1008
Pt    0.0830    0.4695    0.0606
Pt    0.0379    0.4691    0.1020
Pt    0.1238    0.4259    0.1014
Pt    0.1248    0.3363    0.1020
Pt    0.1691    0.3799    0.0565
Pt    0.2110    0.4686    0.1021
Pt    0.2122    0.4735    0.0594
Pt    0.0602    0.2920    0.0364
Pt    0.0611    0.2929    0.0802
Pt    0.0596    0.3371    0.0363
Pt    0.0582    0.3367    0.0801
Pt    0.0594    0.3350    0.1244
Pt    0.0603    0.3820    0.0358
Pt    0.0589    0.3794    0.0795
Pt    0.0595    0.3809    0.1227
Pt    0.0588    0.4251    0.0356
Pt    0.0607    0.4244    0.0808
Pt    0.0578    0.4229    0.1227
Pt    0.0605    0.4705    0.0375
Pt    0.0602    0.4681    0.0804
Pt    0.0596    0.4693    0.1239
Pt    0.0403    0.2946    0.0576
Pt    0.0798    0.3805    0.0589
Pt    0.1234    0.3374    0.0590
Pt    0.1006    0.2936    0.1229
Pt    0.1013    0.3339    0.0359
Pt    0.1033    0.3370    0.0814
Pt    0.1014    0.3378    0.1255
Pt    0.1016    0.3804    0.0374
Pt    0.1016    0.3805    0.0812
Pt    0.1011    0.3821    0.1239
Pt    0.1034    0.4236    0.0358
Pt    0.1026    0.4232    0.0797
Pt    0.1025    0.4262    0.1239
Pt    0.1037    0.4714    0.0368
Pt    0.1030    0.4697    0.0807
Pt    0.1021    0.4702    0.1270
Pt    0.0824    0.4252    0.1025
Pt    0.1239    0.3793    0.0568
Pt    0.0804    0.4247    0.0575
Pt    0.1438    0.2957    0.1221
Pt    0.1446    0.3368    0.0792
Pt    0.1455    0.3380    0.1245
Pt    0.1449    0.3785    0.0363
Pt    0.1448    0.3797    0.0787
Pt    0.1470    0.3803    0.1233
Pt    0.1451    0.4266    0.0345
Pt    0.1437    0.4260    0.0813
Pt    0.1437    0.4262    0.1240
Pt    0.1452    0.4687    0.0354
Pt    0.1485    0.4691    0.0790
Pt    0.1462    0.4693    0.1263
Pt    0.0369    0.3786    0.1032
Pt    0.2542    0.2756    0.0776
Pt    0.1677    0.4275    0.1036
Pt    0.1902    0.2986    0.0791
Pt    0.1890    0.2963    0.1237
Pt    0.1910    0.3394    0.0798
Pt    0.1884    0.3368    0.1217
Pt    0.1924    0.3811    0.0767
Pt    0.1890    0.3842    0.1224
Pt    0.1918    0.4258    0.0361
Pt    0.1889    0.4247    0.0786
Pt    0.1896    0.4251    0.1227
Pt    0.1912    0.4709    0.0379
Pt    0.1909    0.4711    0.0816
Pt    0.1911    0.4700    0.1242
Pt    0.0803    0.3797    0.1014
Pt    0.2532    0.3194    0.1228
Pt    0.1660    0.3382    0.0980
Pt    0.2341    0.2937    0.0344
Pt    0.2319    0.2978    0.0769
Pt    0.2318    0.2960    0.1221
Pt    0.2333    0.3411    0.0781
Pt    0.2336    0.3413    0.1237
Pt    0.2334    0.3833    0.1238
Pt    0.2326    0.4285    0.1215
Pt    0.2358    0.4711    0.0401
Pt    0.2322    0.4697    0.0817
Pt    0.0380    0.4258    0.0589
Pt    0.2547    0.3182    0.0814
Pt    0.0403    0.3163    0.0369
Pt    0.0380    0.3122    0.0840
Pt    0.0377    0.3603    0.0361
Pt    0.0375    0.3576    0.0791
Pt    0.0370    0.3617    0.1249
Pt    0.0357    0.4048    0.0380
Pt    0.0370    0.4030    0.0815
Pt    0.0374    0.4012    0.1240
Pt    0.0374    0.4477    0.0374
Pt    0.0376    0.4466    0.0811
Pt    0.0377    0.4485    0.1232
Pt    0.0399    0.4938    0.0361
Pt    0.0391    0.4918    0.0820
Pt    0.0373    0.4925    0.1242
Pt    0.0803    0.3152    0.0374
Pt    0.0831    0.3139    0.0799
Pt    0.0802    0.3158    0.1276
Pt    0.0805    0.3577    0.0360
Pt    0.0814    0.3589    0.0808
Pt    0.0810    0.3595    0.1227
Pt    0.0807    0.4044    0.0338
Pt    0.0795    0.4036    0.0814
Pt    0.0803    0.4021    0.1226
Pt    0.0828    0.4484    0.0376
Pt    0.0808    0.4478    0.0827
Pt    0.0831    0.4474    0.1222
Pt    0.0817    0.4919    0.0384
Pt    0.0799    0.4924    0.0809
Pt    0.0808    0.4919    0.1270
Pt    0.1227    0.2743    0.1226
Pt    0.1245    0.3154    0.0796
Pt    0.1226    0.3144    0.1237
Pt    0.1246    0.3559    0.0376
Pt    0.1234    0.3589    0.0796
Pt    0.1238    0.3588    0.1250
Pt    0.1249    0.4032    0.0348
Pt    0.1260    0.4036    0.0814
Pt    0.1240    0.4047    0.1237
Pt    0.1234    0.4468    0.0358
Pt    0.1253    0.4499    0.0786
Pt    0.1239    0.4473    0.1266
Pt    0.1264    0.4916    0.0375
Pt    0.1242    0.4893    0.0794
Pt    0.1242    0.4903    0.1260
Pt    0.1681    0.2743    0.1216
Pt    0.1662    0.3167    0.1194
Pt    0.1681    0.3602    0.0799
Pt    0.1678    0.3586    0.1219
Pt    0.1676    0.4031    0.0356
Pt    0.1674    0.4001    0.0801
Pt    0.1672    0.4053    0.1225
Pt    0.1664    0.4484    0.0371
Pt    0.1670    0.4467    0.0820
Pt    0.1698    0.4484    0.1248
Pt    0.1699    0.4937    0.0388
Pt    0.1669    0.4909    0.0826
Pt    0.1689    0.4921    0.1233
Pt    0.2111    0.2766    0.0777
Pt    0.2107    0.2732    0.1196
Pt    0.2113    0.3197    0.0780
Pt    0.2111    0.3186    0.1221
Pt    0.2124    0.3614    0.1233
Pt    0.2117    0.4056    0.0813
Pt    0.2118    0.4068    0.1234
Pt    0.2130    0.4486    0.0383
Pt    0.2103    0.4468    0.0778
Pt    0.2093    0.4465    0.1216
Pt    0.2130    0.4925    0.0355
Pt    0.2136    0.4930    0.0851
Pt    0.2548    0.2757    0.0382
Pt    0.2555    0.5128    0.0179
Pt    0.1906    0.5126    0.0810
Pt    0.0154    0.3805    0.0377
Pt    0.1018    0.5138    0.1244
Pt    0.0171    0.2943    0.0396
Pt    0.1055    0.5129    0.0828
Pt    0.0165    0.4050    0.1021
Pt    0.0370    0.5143    0.0166
Pt    0.1057    0.5114    0.0365
Pt    0.1928    0.5132    0.1277
Pt    0.0161    0.3346    0.0800
Pt    0.0156    0.2746    0.0168
Pt    0.1913    0.5126    0.0385
Pt    0.0163    0.3410    0.1236
Pt    0.1702    0.4274    0.0159
Pt    0.0182    0.4479    0.0598
Pt    0.0826    0.5135    0.1029
Pt    0.0163    0.4253    0.1238
Pt    0.1486    0.4912    0.0167
Pt    0.1470    0.5137    0.1243
Pt    0.0154    0.5134    0.0809
Pt    0.0380    0.4694    0.0154
Pt    0.0604    0.4480    0.0159
Pt    0.1259    0.5122    0.1033
Pt    0.2364    0.4905    0.0176
Pt    0.2141    0.5128    0.0616
Pt    0.0173    0.4695    0.0366
Pt    0.1685    0.5123    0.0619
Pt    0.0165    0.3799    0.0802
Pt    0.0167    0.4727    0.0810
Pt    0.0183    0.3124    0.0623
Pt    0.0393    0.2941    0.0181
Pt    0.0814    0.4722    0.0159
Pt    0.2150    0.4684    0.0165
Pt    0.1693    0.4707    0.0164
Pt    0.1904    0.4053    0.0166
Pt    0.0602    0.3144    0.0156
Pt    0.1008    0.3603    0.0151
Pt    0.1671    0.3813    0.0157
Pt    0.2555    0.3040    0.0175
Pt    0.1907    0.4909    0.0168
Pt    0.1444    0.3588    0.0162
Pt    0.1240    0.4259    0.0159
Pt    0.0605    0.4923    0.0150
Pt    0.0163    0.4485    0.0150
Pt    0.0156    0.3163    0.0152
Pt    0.2563    0.3418    0.2336
Pt    0.2550    0.4744    0.2351
Pt    0.2314    0.2768    0.1449
Pt    0.2094    0.4291    0.2316
Pt    0.2111    0.3398    0.1436
Pt    0.2111    0.3412    0.2315
Pt    0.1914    0.4061    0.1457
Pt    0.2119    0.2963    0.1863
Pt    0.2544    0.4293    0.2332
Pt    0.0565    0.2726    0.2312
Pt    0.0597    0.3599    0.1460
Pt    0.0573    0.4038    0.1462
Pt    0.0587    0.4030    0.1898
Pt    0.0597    0.4475    0.1441
Pt    0.0581    0.4474    0.1898
Pt    0.0586    0.4508    0.2320
Pt    0.0583    0.4919    0.1463
Pt    0.0611    0.4925    0.1890
Pt    0.0576    0.4904    0.2359
Pt    0.0990    0.2745    0.1450
Pt    0.1007    0.2734    0.1881
Pt    0.0976    0.2732    0.2335
Pt    0.1015    0.3139    0.1451
Pt    0.1005    0.3170    0.1873
Pt    0.0982    0.3173    0.2336
Pt    0.1025    0.3587    0.1455
Pt    0.1003    0.3618    0.1903
Pt    0.1008    0.3626    0.2328
Pt    0.1026    0.4025    0.1465
Pt    0.1006    0.4038    0.1894
Pt    0.1027    0.4057    0.2314
Pt    0.1021    0.4472    0.1462
Pt    0.1017    0.4483    0.1885
Pt    0.1034    0.4909    0.1478
Pt    0.1037    0.4940    0.1899
Pt    0.1449    0.2734    0.1439
Pt    0.1439    0.2752    0.1880
Pt    0.1407    0.2765    0.2325
Pt    0.1455    0.3180    0.1457
Pt    0.1436    0.3163    0.1906
Pt    0.1457    0.3196    0.2322
Pt    0.1458    0.3588    0.1460
Pt    0.1456    0.3591    0.1894
Pt    0.1429    0.3617    0.2350
Pt    0.1473    0.4032    0.1444
Pt    0.1446    0.4032    0.1898
Pt    0.1458    0.4063    0.2325
Pt    0.1459    0.4470    0.1473
Pt    0.1466    0.4484    0.1927
Pt    0.1484    0.4913    0.1474
Pt    0.1870    0.2719    0.1456
Pt    0.1889    0.2748    0.1862
Pt    0.1870    0.2760    0.2306
Pt    0.1893    0.3195    0.1444
Pt    0.1916    0.3169    0.1889
Pt    0.1902    0.3210    0.2324
Pt    0.1876    0.3594    0.1435
Pt    0.1896    0.3603    0.1882
Pt    0.1881    0.3632    0.2330
Pt    0.0164    0.5118    0.1685
Pt    0.1894    0.4063    0.1890
Pt    0.1892    0.4078    0.2311
Pt    0.1903    0.4480    0.1460
Pt    0.1927    0.4480    0.1845
Pt    0.1889    0.4488    0.2308
Pt    0.1661    0.4276    0.1894
Pt    0.2315    0.2735    0.1876
Pt    0.2319    0.2747    0.2313
Pt    0.2339    0.3189    0.1441
Pt    0.2347    0.3163    0.1892
Pt    0.2349    0.3195    0.2332
Pt    0.2347    0.3621    0.1461
Pt    0.2328    0.3626    0.1890
Pt    0.2347    0.3645    0.2308
Pt    0.2323    0.4056    0.1432
Pt    0.2347    0.4066    0.1892
Pt    0.2331    0.4072    0.2316
Pt    0.2316    0.4518    0.1878
Pt    0.2340    0.4498    0.2321
Pt    0.2307    0.4929    0.2358
Pt    0.2536    0.4301    0.1874
Pt    0.2537    0.4269    0.1455
Pt    0.2122    0.4263    0.1884
Pt    0.2102    0.3844    0.1889
Pt    0.2088    0.3850    0.2310
Pt    0.2554    0.3861    0.2319
Pt    0.2553    0.3842    0.1887
Pt    0.2543    0.3852    0.1464
Pt    0.0542    0.2959    0.2550
Pt    0.0571    0.3808    0.1688
Pt    0.0583    0.4262    0.1685
Pt    0.0591    0.4277    0.2124
Pt    0.0573    0.4705    0.1673
Pt    0.0575    0.4713    0.2108
Pt    0.2107    0.3824    0.1444
Pt    0.2124    0.3386    0.1890
Pt    0.0982    0.2946    0.1664
Pt    0.0997    0.2969    0.2113
Pt    0.0981    0.2963    0.2533
Pt    0.1023    0.3386    0.1678
Pt    0.0981    0.3389    0.2128
Pt    0.0983    0.3404    0.2550
Pt    0.1008    0.3823    0.1690
Pt    0.1011    0.3830    0.2121
Pt    0.1003    0.3848    0.2535
Pt    0.1011    0.4268    0.1666
Pt    0.1008    0.4272    0.2118
Pt    0.1009    0.4697    0.1683
Pt    0.1028    0.4717    0.2101
Pt    0.2115    0.2988    0.2308
Pt    0.1450    0.2983    0.1681
Pt    0.1439    0.2961    0.2108
Pt    0.1428    0.2963    0.2536
Pt    0.1455    0.3384    0.1688
Pt    0.1442    0.3379    0.2111
Pt    0.1419    0.3394    0.2562
Pt    0.1460    0.3804    0.1655
Pt    0.1480    0.3850    0.2108
Pt    0.1437    0.3831    0.2543
Pt    0.1459    0.4274    0.1687
Pt    0.1464    0.4261    0.2118
Pt    0.1440    0.4301    0.2535
Pt    0.1469    0.4695    0.1681
Pt    0.2554    0.3403    0.1892
Pt    0.1877    0.2950    0.1634
Pt    0.1902    0.2966    0.2093
Pt    0.1873    0.2962    0.2519
Pt    0.1900    0.3399    0.1663
Pt    0.1895    0.3400    0.2101
Pt    0.1898    0.3423    0.2550
Pt    0.1917    0.3835    0.1664
Pt    0.1877    0.3815    0.2101
Pt    0.1891    0.3871    0.2537
Pt    0.1881    0.4276    0.1660
Pt    0.1900    0.4306    0.2086
Pt    0.1900    0.4272    0.2552
Pt    0.2335    0.2988    0.1664
Pt    0.2342    0.2948    0.2096
Pt    0.2322    0.2956    0.2528
Pt    0.2340    0.3400    0.1676
Pt    0.2348    0.3423    0.2098
Pt    0.2331    0.3421    0.2532
Pt    0.2324    0.3847    0.1667
Pt    0.2334    0.3858    0.2097
Pt    0.2313    0.3863    0.2535
Pt    0.2338    0.4311    0.1659
Pt    0.2336    0.4287    0.2095
Pt    0.2322    0.4290    0.2543
Pt    0.2333    0.4706    0.2552
Pt    0.2556    0.3416    0.1454
Pt    0.0329    0.2719    0.2555
Pt    0.0368    0.4030    0.1683
Pt    0.0359    0.4486    0.1676
Pt    0.0379    0.4460    0.2115
Pt    0.0380    0.4933    0.1703
Pt    0.0361    0.4932    0.2115
Pt    0.0358    0.4870    0.2544
Pt    0.0798    0.2737    0.2096
Pt    0.0748    0.2711    0.2559
Pt    0.0764    0.3168    0.2138
Pt    0.0748    0.3168    0.2536
Pt    0.0805    0.3605    0.1668
Pt    0.0800    0.4051    0.1681
Pt    0.0791    0.4049    0.2129
Pt    0.0793    0.4478    0.1679
Pt    0.0796    0.4506    0.2115
Pt    0.0806    0.4925    0.1683
Pt    0.0785    0.4914    0.2125
Pt    0.1225    0.2732    0.1668
Pt    0.1199    0.2751    0.2105
Pt    0.1201    0.2747    0.2548
Pt    0.1230    0.3166    0.1665
Pt    0.1207    0.3190    0.2123
Pt    0.1223    0.3178    0.2556
Pt    0.1230    0.3607    0.1692
Pt    0.1207    0.3595    0.2118
Pt    0.1202    0.3620    0.2558
Pt    0.1237    0.4036    0.1680
Pt    0.1222    0.4047    0.2089
Pt    0.1208    0.4070    0.2545
Pt    0.1250    0.4491    0.1677
Pt    0.1218    0.4491    0.2117
Pt    0.1270    0.4922    0.1694
Pt    0.1649    0.2734    0.1666
Pt    0.1661    0.2738    0.2101
Pt    0.1653    0.2755    0.2540
Pt    0.1673    0.3191    0.1689
Pt    0.1674    0.3185    0.2100
Pt    0.1676    0.3203    0.2533
Pt    0.1694    0.3618    0.1666
Pt    0.1646    0.3601    0.2104
Pt    0.1669    0.3634    0.2554
Pt    0.1678    0.4041    0.1679
Pt    0.1678    0.4063    0.2099
Pt    0.1663    0.4068    0.2535
Pt    0.1685    0.4493    0.1690
Pt    0.2106    0.2759    0.1656
Pt    0.2095    0.2754    0.2108
Pt    0.2083    0.2764    0.2527
Pt    0.2106    0.3191    0.1645
Pt    0.2149    0.3180    0.2100
Pt    0.2117    0.3193    0.2519
Pt    0.2103    0.3616    0.1653
Pt    0.2113    0.3619    0.2113
Pt    0.2115    0.3629    0.2536
Pt    0.2122    0.4074    0.1671
Pt    0.2101    0.4066    0.2100
Pt    0.2110    0.4059    0.2547
Pt    0.2126    0.4500    0.2103
Pt    0.2112    0.4502    0.2531
Pt    0.2535    0.2771    0.1667
Pt    0.2549    0.2747    0.2119
Pt    0.2537    0.2751    0.2532
Pt    0.2553    0.3206    0.1659
Pt    0.2539    0.3190    0.2101
Pt    0.2548    0.3209    0.2551
Pt    0.2542    0.3632    0.1684
Pt    0.2575    0.3631    0.2113
Pt    0.2569    0.3636    0.2542
Pt    0.2545    0.4067    0.1673
Pt    0.2545    0.4076    0.2113
Pt    0.2538    0.4084    0.2546
Pt    0.2536    0.4529    0.2099
Pt    0.2558    0.4504    0.2553
Pt    0.2535    0.4954    0.2557
Pt    0.0360    0.2938    0.2349
Pt    0.0385    0.3807    0.1457
Pt    0.0375    0.4260    0.1461
Pt    0.0381    0.4238    0.1900
Pt    0.0382    0.4700    0.1445
Pt    0.0347    0.4702    0.1894
Pt    0.0341    0.4683    0.2324
Pt    0.2548    0.2985    0.1440
Pt    0.2102    0.2968    0.1440
Pt    0.2551    0.2965    0.2317
Pt    0.0803    0.2967    0.1929
Pt    0.0771    0.2957    0.2335
Pt    0.0816    0.3371    0.1471
Pt    0.0809    0.3367    0.1878
Pt    0.0779    0.3388    0.2350
Pt    0.0800    0.3822    0.1448
Pt    0.0783    0.3839    0.1896
Pt    0.0797    0.4258    0.1464
Pt    0.0806    0.4266    0.1895
Pt    0.0802    0.4689    0.1465
Pt    0.0800    0.4695    0.1899
Pt    0.0822    0.4700    0.2322
Pt    0.2558    0.2966    0.1898
Pt    0.1668    0.4303    0.2319
Pt    0.1241    0.2942    0.1455
Pt    0.1213    0.2951    0.1888
Pt    0.1202    0.2970    0.2331
Pt    0.1237    0.3380    0.1462
Pt    0.1223    0.3384    0.1906
Pt    0.1209    0.3404    0.2343
Pt    0.1242    0.3834    0.1448
Pt    0.1255    0.3811    0.1905
Pt    0.1239    0.3859    0.2313
Pt    0.1226    0.4255    0.1475
Pt    0.1232    0.4276    0.1872
Pt    0.1240    0.4270    0.2316
Pt    0.1229    0.4702    0.1480
Pt    0.1241    0.4700    0.1883
Pt    0.1675    0.4701    0.1463
Pt    0.2144    0.4281    0.1460
Pt    0.1645    0.2954    0.1440
Pt    0.1661    0.2958    0.1891
Pt    0.1667    0.2974    0.2296
Pt    0.1669    0.3391    0.1457
Pt    0.1695    0.3384    0.1888
Pt    0.1677    0.3402    0.2330
Pt    0.1705    0.3833    0.1459
Pt    0.1680    0.3838    0.1878
Pt    0.1662    0.3836    0.2346
Pt    0.1678    0.4250    0.1441
Pt    0.0162    0.4241    0.1694
Pt    0.0160    0.4467    0.1458
Pt    0.0155    0.3608    0.1465
Pt    0.0156    0.4906    0.1480
Pt    0.0808    0.5139    0.1914
Pt    0.0177    0.4041    0.1452
Pt    0.1255    0.5134    0.1445
Pt    0.1038    0.5136    0.1656
Pt    0.0169    0.3808    0.1681
Pt    0.0344    0.5134    0.1903
Pt    0.2528    0.5134    0.2327
Pt    0.0590    0.5139    0.2147
Pt    0.0360    0.5127    0.2339
Pt    0.0375    0.5140    0.1453
Pt    0.1698    0.5138    0.1447
Pt    0.2546    0.2984    0.3209
Pt    0.2530    0.4734    0.3238
Pt    0.0590    0.5102    0.2944
Pt    0.2547    0.4716    0.2767
Pt    0.2530    0.4306    0.3647
Pt    0.2548    0.4314    0.3212
Pt    0.2524    0.4279    0.2781
Pt    0.2123    0.3408    0.3629
Pt    0.0537    0.2713    0.2758
Pt    0.0552    0.2725    0.3221
Pt    0.0548    0.3180    0.2755
Pt    0.0548    0.3193    0.3199
Pt    0.0569    0.3612    0.3628
Pt    0.0601    0.4060    0.3624
Pt    0.0584    0.4484    0.3181
Pt    0.0566    0.4484    0.3624
Pt    0.0609    0.4910    0.3164
Pt    0.0594    0.4910    0.3621
Pt    0.0981    0.2725    0.2757
Pt    0.0997    0.2746    0.3202
Pt    0.1000    0.2738    0.3633
Pt    0.1002    0.3179    0.2763
Pt    0.0992    0.3175    0.3183
Pt    0.1018    0.3200    0.3628
Pt    0.0977    0.3633    0.2752
Pt    0.0982    0.3604    0.3182
Pt    0.0993    0.3589    0.3613
Pt    0.1012    0.4076    0.3164
Pt    0.1014    0.4048    0.3609
Pt    0.1014    0.4485    0.3608
Pt    0.1041    0.4927    0.3619
Pt    0.1429    0.2754    0.2758
Pt    0.1452    0.2744    0.3202
Pt    0.1426    0.2773    0.3640
Pt    0.1434    0.3189    0.2775
Pt    0.1456    0.3191    0.3197
Pt    0.1436    0.3184    0.3636
Pt    0.1474    0.3625    0.2762
Pt    0.1442    0.3607    0.3186
Pt    0.1448    0.3598    0.3630
Pt    0.1444    0.4051    0.2738
Pt    0.1455    0.4057    0.3187
Pt    0.1427    0.4039    0.3617
Pt    0.1441    0.4498    0.3170
Pt    0.1442    0.4494    0.3623
Pt    0.1455    0.4924    0.3593
Pt    0.1872    0.2761    0.2751
Pt    0.1901    0.2754    0.3191
Pt    0.1896    0.2766    0.3645
Pt    0.1901    0.3194    0.2736
Pt    0.1884    0.3190    0.3203
Pt    0.1914    0.3176    0.3641
Pt    0.1880    0.3641    0.2754
Pt    0.1884    0.3624    0.3191
Pt    0.1885    0.3615    0.3632
Pt    0.1880    0.4065    0.2764
Pt    0.1880    0.4071    0.3181
Pt    0.1893    0.4057    0.3599
Pt    0.1891    0.4501    0.2718
Pt    0.1878    0.4520    0.3191
Pt    0.1879    0.4471    0.3627
Pt    0.2317    0.2762    0.2760
Pt    0.2336    0.2756    0.3173
Pt    0.2331    0.2746    0.3624
Pt    0.2323    0.3182    0.2752
Pt    0.2343    0.3170    0.3228
Pt    0.2325    0.3183    0.3639
Pt    0.2316    0.3633    0.2774
Pt    0.2335    0.3627    0.3186
Pt    0.2327    0.3617    0.3636
Pt    0.2329    0.4059    0.2751
Pt    0.2326    0.4076    0.3205
Pt    0.2326    0.4075    0.3640
Pt    0.2325    0.4503    0.2774
Pt    0.2335    0.4514    0.3215
Pt    0.2327    0.4504    0.3685
Pt    0.2338    0.4932    0.2765
Pt    0.2324    0.4955    0.3191
Pt    0.1655    0.4688    0.3618
Pt    0.2540    0.3854    0.3600
Pt    0.2555    0.3852    0.3183
Pt    0.2119    0.2949    0.3642
Pt    0.2536    0.3851    0.2741
Pt    0.2106    0.2973    0.3220
Pt    0.2555    0.3410    0.3644
Pt    0.2544    0.3413    0.3216
Pt    0.2526    0.3420    0.2761
Pt    0.2560    0.2957    0.3635
Pt    0.0570    0.2957    0.2971
Pt    0.0575    0.2959    0.3429
Pt    0.0537    0.3415    0.2954
Pt    0.0556    0.3409    0.3401
Pt    0.0593    0.3836    0.3834
Pt    0.0587    0.4264    0.3395
Pt    0.0579    0.4257    0.3856
Pt    0.0580    0.4691    0.3389
Pt    0.0587    0.4698    0.3825
Pt    0.2534    0.2985    0.2758
Pt    0.2105    0.3384    0.3208
Pt    0.2116    0.4730    0.3213
Pt    0.0995    0.2955    0.2994
Pt    0.1005    0.2971    0.3415
Pt    0.0977    0.2963    0.3850
Pt    0.0982    0.3403    0.2974
Pt    0.0995    0.3384    0.3403
Pt    0.1009    0.3394    0.3849
Pt    0.0992    0.3838    0.2960
Pt    0.1004    0.3826    0.3405
Pt    0.0994    0.3814    0.3844
Pt    0.1013    0.4261    0.3390
Pt    0.1033    0.4263    0.3828
Pt    0.0995    0.4729    0.3388
Pt    0.1024    0.4726    0.3830
Pt    0.2115    0.4733    0.2747
Pt    0.1675    0.4286    0.3594
Pt    0.1443    0.2978    0.2991
Pt    0.1444    0.2985    0.3417
Pt    0.1454    0.2993    0.3842
Pt    0.1442    0.3425    0.2971
Pt    0.1452    0.3399    0.3413
Pt    0.1457    0.3397    0.3864
Pt    0.1461    0.3835    0.2997
Pt    0.1450    0.3818    0.3411
Pt    0.1447    0.3819    0.3869
Pt    0.1456    0.4296    0.2944
Pt    0.1448    0.4268    0.3403
Pt    0.1451    0.4270    0.3816
Pt    0.1464    0.4717    0.3833
Pt    0.2112    0.4277    0.3642
Pt    0.1902    0.2986    0.2964
Pt    0.1896    0.2970    0.3427
Pt    0.1919    0.2980    0.3877
Pt    0.1897    0.3406    0.2980
Pt    0.1886    0.3390    0.3438
Pt    0.1899    0.3403    0.3826
Pt    0.1888    0.3837    0.2974
Pt    0.1885    0.3831    0.3413
Pt    0.1867    0.3834    0.3839
Pt    0.1890    0.4304    0.2968
Pt    0.1921    0.4275    0.3406
Pt    0.1875    0.4268    0.3849
Pt    0.1899    0.4707    0.2971
Pt    0.1859    0.4698    0.3418
Pt    0.2324    0.2963    0.2986
Pt    0.2328    0.2946    0.3406
Pt    0.2101    0.2978    0.2756
Pt    0.2347    0.3390    0.3000
Pt    0.2339    0.3418    0.3431
Pt    0.2323    0.3405    0.3861
Pt    0.2327    0.3860    0.2982
Pt    0.2322    0.3857    0.3405
Pt    0.2330    0.3845    0.3861
Pt    0.2316    0.4291    0.2990
Pt    0.2312    0.4284    0.3419
Pt    0.0155    0.3627    0.3620
Pt    0.2330    0.4725    0.2985
Pt    0.2317    0.4713    0.3430
Pt    0.2323    0.2970    0.3876
Pt    0.0356    0.2753    0.2996
Pt    0.0370    0.3164    0.2965
Pt    0.0373    0.3610    0.3823
Pt    0.0384    0.4033    0.3821
Pt    0.0354    0.4484    0.3399
Pt    0.0351    0.4489    0.3813
Pt    0.0356    0.4910    0.2960
Pt    0.0365    0.4909    0.3387
Pt    0.0367    0.4926    0.3829
Pt    0.0782    0.2758    0.2999
Pt    0.0779    0.2734    0.3421
Pt    0.0768    0.3178    0.2970
Pt    0.0790    0.3193    0.3406
Pt    0.0787    0.3214    0.3837
Pt    0.0766    0.3631    0.2992
Pt    0.0777    0.3602    0.3397
Pt    0.0782    0.3577    0.3855
Pt    0.0804    0.4067    0.3402
Pt    0.0803    0.4059    0.3856
Pt    0.0792    0.4477    0.3392
Pt    0.0829    0.4476    0.3834
Pt    0.0813    0.4932    0.3396
Pt    0.0812    0.4932    0.3822
Pt    0.1194    0.2736    0.2962
Pt    0.1210    0.2745    0.3415
Pt    0.1212    0.2773    0.3854
Pt    0.1221    0.3176    0.2980
Pt    0.1222    0.3181    0.3413
Pt    0.1231    0.3196    0.3844
Pt    0.1220    0.3633    0.2973
Pt    0.1227    0.3602    0.3377
Pt    0.1218    0.3605    0.3860
Pt    0.1247    0.4046    0.2980
Pt    0.1229    0.4033    0.3384
Pt    0.1224    0.4048    0.3830
Pt    0.1236    0.4493    0.3393
Pt    0.1229    0.4497    0.3812
Pt    0.1256    0.4926    0.3826
Pt    0.1665    0.2773    0.2973
Pt    0.1674    0.2764    0.3424
Pt    0.1659    0.2757    0.3845
Pt    0.1673    0.3193    0.2964
Pt    0.1668    0.3172    0.3404
Pt    0.1696    0.3169    0.3866
Pt    0.1674    0.3611    0.2974
Pt    0.1659    0.3602    0.3416
Pt    0.1671    0.3616    0.3872
Pt    0.1664    0.4103    0.2961
Pt    0.1650    0.4043    0.3402
Pt    0.1649    0.4051    0.3810
Pt    0.1664    0.4522    0.2949
Pt    0.1617    0.4511    0.3399
Pt    0.1670    0.4492    0.3832
Pt    0.1684    0.4905    0.3828
Pt    0.2102    0.2770    0.2969
Pt    0.2101    0.2740    0.3408
Pt    0.2117    0.2750    0.3880
Pt    0.2130    0.3176    0.2989
Pt    0.2106    0.3188    0.3429
Pt    0.2135    0.3188    0.3858
Pt    0.2128    0.3615    0.2984
Pt    0.2110    0.3626    0.3415
Pt    0.2101    0.3631    0.3853
Pt    0.2104    0.4059    0.2968
Pt    0.2106    0.4045    0.3401
Pt    0.2090    0.4053    0.3845
Pt    0.2113    0.4509    0.2993
Pt    0.2095    0.4498    0.3417
Pt    0.2097    0.4495    0.3851
Pt    0.2099    0.4917    0.2996
Pt    0.2559    0.2758    0.2961
Pt    0.2561    0.2757    0.3417
Pt    0.2103    0.3828    0.2756
Pt    0.2534    0.3175    0.2975
Pt    0.2553    0.3186    0.3448
Pt    0.2538    0.3212    0.3854
Pt    0.2543    0.3617    0.2969
Pt    0.2543    0.3639    0.3406
Pt    0.2538    0.3623    0.3866
Pt    0.2533    0.4065    0.2982
Pt    0.2550    0.4081    0.3424
Pt    0.2519    0.4069    0.3858
Pt    0.2534    0.4505    0.2990
Pt    0.2530    0.4519    0.3433
Pt    0.2541    0.4920    0.3001
Pt    0.0313    0.2953    0.2756
Pt    0.0377    0.2958    0.3199
Pt    0.0391    0.3832    0.3607
Pt    0.0378    0.4249    0.3602
Pt    0.0387    0.4689    0.3163
Pt    0.0359    0.4696    0.3602
Pt    0.2108    0.4268    0.3189
Pt    0.2108    0.4301    0.2765
Pt    0.2537    0.2752    0.3872
Pt    0.0785    0.2949    0.2762
Pt    0.0755    0.2961    0.3201
Pt    0.0785    0.2983    0.3645
Pt    0.0771    0.3407    0.2758
Pt    0.0753    0.3407    0.3181
Pt    0.0775    0.3396    0.3614
Pt    0.0788    0.3823    0.3210
Pt    0.0799    0.3828    0.3609
Pt    0.0806    0.4270    0.3639
Pt    0.0784    0.4703    0.3192
Pt    0.0797    0.4694    0.3606
Pt    0.2133    0.3840    0.3635
Pt    0.2107    0.3835    0.3190
Pt    0.1218    0.2968    0.2773
Pt    0.1229    0.2975    0.3199
Pt    0.1204    0.2968    0.3642
Pt    0.1196    0.3414    0.2748
Pt    0.1221    0.3384    0.3189
Pt    0.1242    0.3403    0.3627
Pt    0.1236    0.3833    0.2765
Pt    0.1204    0.3820    0.3191
Pt    0.1206    0.3820    0.3608
Pt    0.1241    0.4280    0.3184
Pt    0.1228    0.4262    0.3598
Pt    0.1234    0.4718    0.3594
Pt    0.2116    0.3400    0.2764
Pt    0.1659    0.2984    0.2731
Pt    0.1679    0.2973    0.3198
Pt    0.1670    0.2972    0.3642
Pt    0.1672    0.3402    0.2752
Pt    0.1691    0.3388    0.3187
Pt    0.1663    0.3394    0.3644
Pt    0.1657    0.3865    0.2770
Pt    0.1674    0.3842    0.3204
Pt    0.1653    0.3810    0.3629
Pt    0.1659    0.4290    0.2737
Pt    0.1682    0.4308    0.3188
Pt    0.1674    0.5116    0.3602
Pt    0.0398    0.5101    0.2735
Pt    0.0381    0.5129    0.3157
Pt    0.0161    0.4260    0.3404
Pt    0.2320    0.4299    0.3875
Pt    0.0155    0.3828    0.3831
Pt    0.0154    0.5125    0.3392
Pt    0.0376    0.5131    0.3608
Pt    0.0157    0.4258    0.3820
Pt    0.0160    0.4458    0.3168
Pt    0.0157    0.4920    0.3177
Pt    0.0160    0.4924    0.2749
Pt    0.1488    0.5127    0.3816
Pt    0.0176    0.4047    0.3591
Pt    0.0590    0.5127    0.3386
Pt    0.0594    0.5142    0.3819
Pt    0.2566    0.5139    0.2789
Pt    0.0792    0.5137    0.3181
Pt    0.1486    0.4270    0.5133
Pt    0.2545    0.3854    0.4079
Pt    0.2506    0.3406    0.4521
Pt    0.0172    0.3615    0.4049
Pt    0.2552    0.3399    0.4084
Pt    0.1286    0.3608    0.5138
Pt    0.0166    0.3354    0.4704
Pt    0.0567    0.5139    0.4253
Pt    0.1042    0.3835    0.5126
Pt    0.1466    0.5124    0.4269
Pt    0.2547    0.2986    0.4965
Pt    0.2537    0.2753    0.4742
Pt    0.2565    0.2754    0.4305
Pt    0.1900    0.4699    0.5135
Pt    0.2541    0.2970    0.4525
Pt    0.0589    0.3163    0.4499
Pt    0.0578    0.3164    0.4952
Pt    0.0560    0.3584    0.4040
Pt    0.0601    0.3606    0.4497
Pt    0.0604    0.3608    0.4914
Pt    0.0592    0.4040    0.4067
Pt    0.0595    0.4044    0.4490
Pt    0.0586    0.4045    0.4927
Pt    0.0595    0.4493    0.4054
Pt    0.0573    0.4531    0.4493
Pt    0.0582    0.4501    0.4926
Pt    0.0579    0.4931    0.4044
Pt    0.0583    0.4948    0.4475
Pt    0.0594    0.4940    0.4951
Pt    0.0997    0.3161    0.4057
Pt    0.1012    0.3584    0.4075
Pt    0.1028    0.3572    0.4496
Pt    0.1038    0.3609    0.4944
Pt    0.1026    0.4064    0.4065
Pt    0.1018    0.4044    0.4500
Pt    0.1039    0.4061    0.4928
Pt    0.1046    0.4501    0.4055
Pt    0.1036    0.4487    0.4505
Pt    0.1014    0.4504    0.4924
Pt    0.1031    0.4911    0.4046
Pt    0.1013    0.4959    0.4491
Pt    0.1011    0.4919    0.4926
Pt    0.1438    0.2742    0.4068
Pt    0.1455    0.3190    0.4067
Pt    0.1460    0.3183    0.4516
Pt    0.1435    0.3602    0.4072
Pt    0.1476    0.3622    0.4528
Pt    0.1466    0.3588    0.4914
Pt    0.1442    0.4056    0.4049
Pt    0.1470    0.4065    0.4505
Pt    0.1490    0.4074    0.4922
Pt    0.1459    0.4484    0.4044
Pt    0.1465    0.4523    0.4489
Pt    0.1464    0.4491    0.4935
Pt    0.1461    0.4927    0.4037
Pt    0.1471    0.4926    0.4491
Pt    0.1470    0.4946    0.4940
Pt    0.1881    0.2767    0.4075
Pt    0.1904    0.2748    0.4540
Pt    0.1881    0.3197    0.4090
Pt    0.1891    0.3199    0.4508
Pt    0.1887    0.3608    0.4083
Pt    0.1912    0.3626    0.4528
Pt    0.1892    0.4045    0.4058
Pt    0.1900    0.4069    0.4505
Pt    0.1904    0.4470    0.4071
Pt    0.1902    0.4497    0.4487
Pt    0.1919    0.4494    0.4915
Pt    0.1884    0.4934    0.4491
Pt    0.1914    0.4936    0.4930
Pt    0.2327    0.2742    0.4105
Pt    0.2336    0.2752    0.4497
Pt    0.2297    0.2729    0.4975
Pt    0.2344    0.3196    0.4094
Pt    0.2321    0.3187    0.4528
Pt    0.2315    0.3186    0.4955
Pt    0.2322    0.3621    0.4083
Pt    0.2344    0.3659    0.4522
Pt    0.2311    0.4068    0.4070
Pt    0.2358    0.4933    0.4940
Pt    0.2520    0.2961    0.4083
Pt    0.1689    0.4704    0.4920
Pt    0.1687    0.4725    0.4478
Pt    0.2532    0.3201    0.4735
Pt    0.2144    0.4705    0.4913
Pt    0.0368    0.4280    0.4498
Pt    0.2106    0.4705    0.4490
Pt    0.2102    0.4267    0.4050
Pt    0.2122    0.3854    0.4518
Pt    0.2124    0.3844    0.4075
Pt    0.2104    0.3417    0.4528
Pt    0.2099    0.3414    0.4071
Pt    0.2106    0.2958    0.4920
Pt    0.2105    0.2982    0.4526
Pt    0.2102    0.2957    0.4121
Pt    0.0190    0.3369    0.4266
Pt    0.1686    0.4706    0.4055
Pt    0.1660    0.2956    0.4540
Pt    0.0588    0.3370    0.4289
Pt    0.0596    0.3366    0.4733
Pt    0.1238    0.5131    0.4047
Pt    0.0584    0.3809    0.4270
Pt    0.0586    0.3835    0.4704
Pt    0.1650    0.2949    0.4090
Pt    0.0585    0.4286    0.4262
Pt    0.0580    0.4280    0.4712
Pt    0.0812    0.4052    0.5126
Pt    0.0556    0.4732    0.4276
Pt    0.0589    0.4744    0.4698
Pt    0.2551    0.3198    0.4309
Pt    0.1689    0.4291    0.4920
Pt    0.1680    0.4264    0.4499
Pt    0.0363    0.4265    0.4045
Pt    0.1025    0.3361    0.4270
Pt    0.1014    0.3361    0.4700
Pt    0.0825    0.4308    0.4069
Pt    0.1039    0.3809    0.4273
Pt    0.1022    0.3822    0.4734
Pt    0.0823    0.3823    0.4935
Pt    0.1028    0.4268    0.4307
Pt    0.1029    0.4276    0.4718
Pt    0.1252    0.4716    0.4933
Pt    0.1029    0.4718    0.4279
Pt    0.1028    0.4718    0.4704
Pt    0.1240    0.4743    0.4492
Pt    0.1679    0.4290    0.4064
Pt    0.1732    0.3849    0.4930
Pt    0.0814    0.3824    0.4480
Pt    0.1449    0.2961    0.4299
Pt    0.1452    0.3379    0.4289
Pt    0.1457    0.3838    0.4296
Pt    0.1482    0.3826    0.4739
Pt    0.1249    0.4694    0.4033
Pt    0.1471    0.4277    0.4263
Pt    0.1476    0.4289    0.4706
Pt    0.0368    0.3819    0.4492
Pt    0.1489    0.4722    0.4255
Pt    0.1474    0.4718    0.4728
Pt    0.1249    0.4284    0.4915
Pt    0.0386    0.3828    0.4055
Pt    0.1682    0.3845    0.4515
Pt    0.0374    0.4730    0.4944
Pt    0.1869    0.2966    0.4303
Pt    0.1883    0.2964    0.4725
Pt    0.1899    0.3414    0.4300
Pt    0.1871    0.3359    0.4758
Pt    0.1903    0.3839    0.4311
Pt    0.1888    0.4275    0.4278
Pt    0.1900    0.4282    0.4699
Pt    0.1253    0.4278    0.4503
Pt    0.1894    0.4700    0.4272
Pt    0.1927    0.4713    0.4717
Pt    0.0790    0.4727    0.4927
Pt    0.1653    0.3832    0.4078
Pt    0.0354    0.3399    0.4929
Pt    0.0791    0.4701    0.4056
Pt    0.2325    0.2969    0.4296
Pt    0.2352    0.2961    0.4738
Pt    0.0372    0.3365    0.4502
Pt    0.2321    0.3420    0.4300
Pt    0.2273    0.3437    0.4759
Pt    0.2346    0.3875    0.4314
Pt    0.1236    0.4278    0.4053
Pt    0.1672    0.3412    0.4500
Pt    0.0366    0.2947    0.4937
Pt    0.1257    0.3829    0.4925
Pt    0.0383    0.3172    0.4714
Pt    0.1246    0.3799    0.4533
Pt    0.0379    0.3610    0.4290
Pt    0.0374    0.3603    0.4706
Pt    0.0340    0.4748    0.4466
Pt    0.0375    0.4049    0.4287
Pt    0.0366    0.4028    0.4704
Pt    0.0789    0.4728    0.4496
Pt    0.0349    0.4481    0.4253
Pt    0.0366    0.4519    0.4703
Pt    0.0160    0.3587    0.4499
Pt    0.0337    0.4949    0.4242
Pt    0.0358    0.4946    0.4695
Pt    0.0794    0.3819    0.4059
Pt    0.0787    0.3160    0.4727
Pt    0.1223    0.3831    0.4053
Pt    0.0808    0.3598    0.4274
Pt    0.0820    0.3594    0.4700
Pt    0.1266    0.3390    0.4524
Pt    0.0816    0.4064    0.4276
Pt    0.0820    0.4057    0.4726
Pt    0.0370    0.3816    0.4924
Pt    0.0808    0.4497    0.4307
Pt    0.0797    0.4507    0.4707
Pt    0.1231    0.3381    0.4085
Pt    0.0811    0.4945    0.4270
Pt    0.0807    0.4937    0.4718
Pt    0.0802    0.4284    0.4919
Pt    0.1246    0.3155    0.4307
Pt    0.1241    0.3611    0.4295
Pt    0.1216    0.3579    0.4741
Pt    0.0372    0.4706    0.4051
Pt    0.1241    0.4054    0.4287
Pt    0.1250    0.4041    0.4706
Pt    0.2523    0.3634    0.4297
Pt    0.1245    0.4497    0.4276
Pt    0.1267    0.4499    0.4711
Pt    0.0813    0.3384    0.4961
Pt    0.1238    0.4932    0.4255
Pt    0.1254    0.4958    0.4700
Pt    0.0378    0.4283    0.4914
Pt    0.1665    0.2756    0.4319
Pt    0.1656    0.3166    0.4305
Pt    0.1676    0.3641    0.4308
Pt    0.1698    0.3615    0.4742
Pt    0.1220    0.2968    0.4066
Pt    0.1670    0.4048    0.4282
Pt    0.1717    0.4064    0.4728
Pt    0.0827    0.3349    0.4487
Pt    0.1669    0.4498    0.4273
Pt    0.1689    0.4504    0.4697
Pt    0.0782    0.3367    0.4077
Pt    0.1699    0.4938    0.4262
Pt    0.1704    0.4928    0.4712
Pt    0.0806    0.4263    0.4507
Pt    0.2085    0.2744    0.4320
Pt    0.2133    0.2764    0.4724
Pt    0.2102    0.3199    0.4291
Pt    0.2104    0.3206    0.4738
Pt    0.2114    0.3641    0.4295
Pt    0.2120    0.4069    0.4283
Pt    0.2132    0.4480    0.4695
Pt    0.1669    0.3400    0.4087
Pt    0.2116    0.4928    0.4715
Pt    0.2129    0.4905    0.5138
Pt    0.1703    0.5139    0.4053
Pt    0.1917    0.5134    0.4277
Pt    0.1663    0.3636    0.5128
Pt    0.0157    0.4925    0.4930
Pt    0.0170    0.3819    0.4272
Pt    0.1686    0.4494    0.5140
Pt    0.1258    0.4060    0.5137
Pt    0.2572    0.5141    0.4916
Pt    0.2554    0.4900    0.5140
Pt    0.0609    0.4276    0.5144
Pt    0.0160    0.3159    0.4488
Pt    0.0168    0.3165    0.4939
Pt    0.0373    0.4051    0.5137
Pt    0.1913    0.4237    0.5125
Pt    0.1461    0.3848    0.5145
Pt    0.1237    0.4932    0.5143
Pt    0.0156    0.3615    0.4943
Pt    0.0153    0.4735    0.4709
Pt    0.0153    0.4285    0.4726
Pt    0.1012    0.5142    0.4722
Pt    0.0154    0.4289    0.5143
Pt    0.1259    0.4496    0.5145
Pt    0.0572    0.3398    0.5145
Pt    0.2332    0.4676    0.5148
Pt    0.2123    0.4446    0.5145
Pt    0.1038    0.4719    0.5142
Pt    0.0356    0.4493    0.5145
Pt    0.1263    0.3828    0.5806
Pt    0.0807    0.4497    0.5156
Pt    0.1465    0.4734    0.5152
Pt    0.0171    0.4478    0.5806
Pt    0.1689    0.4684    0.5360
Pt    0.2561    0.4657    0.5365
Pt    0.2562    0.3888    0.6182
Pt    0.2543    0.3421    0.6218
Pt    0.2530    0.3423    0.5775
Pt    0.2534    0.2985    0.6221
Pt    0.1683    0.4275    0.6255
Pt    0.2541    0.2977    0.5774
Pt    0.2542    0.2987    0.5398
Pt    0.1251    0.4723    0.5363
Pt    0.0156    0.3400    0.6045
Pt    0.0571    0.2763    0.5373
Pt    0.0581    0.3174    0.5383
Pt    0.0604    0.3165    0.5805
Pt    0.0589    0.3616    0.5357
Pt    0.0587    0.3620    0.5805
Pt    0.0582    0.3625    0.6240
Pt    0.0589    0.4072    0.5381
Pt    0.0600    0.4061    0.5809
Pt    0.0561    0.4048    0.6255
Pt    0.0579    0.4485    0.5379
Pt    0.0597    0.4503    0.5812
Pt    0.0607    0.4465    0.6277
Pt    0.0602    0.4935    0.5383
Pt    0.0589    0.4932    0.5822
Pt    0.0584    0.4946    0.6268
Pt    0.1025    0.3183    0.5382
Pt    0.1028    0.3153    0.5800
Pt    0.1001    0.3176    0.6211
Pt    0.1031    0.3643    0.5346
Pt    0.1012    0.3616    0.5803
Pt    0.1021    0.3620    0.6233
Pt    0.1031    0.4058    0.5344
Pt    0.1042    0.4056    0.5785
Pt    0.1010    0.4041    0.6257
Pt    0.1026    0.4505    0.5352
Pt    0.1027    0.4516    0.5817
Pt    0.1020    0.4498    0.6261
Pt    0.1026    0.4939    0.5359
Pt    0.1045    0.4910    0.5794
Pt    0.1036    0.4949    0.6268
Pt    0.1425    0.2764    0.6195
Pt    0.1448    0.3172    0.6210
Pt    0.1491    0.3588    0.5352
Pt    0.1459    0.3611    0.5803
Pt    0.1461    0.3613    0.6247
Pt    0.1465    0.4054    0.5365
Pt    0.1456    0.4057    0.5818
Pt    0.1452    0.4031    0.6244
Pt    0.1471    0.4504    0.5379
Pt    0.1475    0.4493    0.5813
Pt    0.1452    0.4489    0.6265
Pt    0.1460    0.4956    0.5357
Pt    0.1491    0.4920    0.5796
Pt    0.1451    0.4942    0.6250
Pt    0.1899    0.2756    0.5770
Pt    0.1892    0.2765    0.6210
Pt    0.1896    0.3198    0.5748
Pt    0.1892    0.3189    0.6213
Pt    0.1890    0.3620    0.5768
Pt    0.1878    0.3624    0.6223
Pt    0.1904    0.4039    0.5376
Pt    0.1907    0.4039    0.5810
Pt    0.1920    0.4050    0.6236
Pt    0.1901    0.4486    0.5361
Pt    0.1931    0.4480    0.5822
Pt    0.1895    0.4507    0.6264
Pt    0.1928    0.4914    0.5362
Pt    0.1913    0.4897    0.5816
Pt    0.1906    0.4881    0.6273
Pt    0.2287    0.2741    0.5301
Pt    0.2318    0.2764    0.5784
Pt    0.2336    0.2766    0.6222
Pt    0.2339    0.3198    0.5760
Pt    0.2305    0.3207    0.6218
Pt    0.2338    0.3645    0.6223
Pt    0.2345    0.4074    0.6242
Pt    0.2312    0.4452    0.5380
Pt    0.2290    0.4473    0.5810
Pt    0.2330    0.4893    0.5360
Pt    0.2371    0.4907    0.5783
Pt    0.1667    0.4262    0.5799
Pt    0.2150    0.4721    0.5802
Pt    0.1653    0.4728    0.6271
Pt    0.1241    0.4259    0.6262
Pt    0.2143    0.4665    0.5352
Pt    0.1664    0.4265    0.5362
Pt    0.1673    0.3821    0.6248
Pt    0.1655    0.3852    0.5809
Pt    0.1683    0.3828    0.5371
Pt    0.2110    0.4296    0.6226
Pt    0.2132    0.4235    0.5775
Pt    0.0597    0.2955    0.5603
Pt    0.0607    0.3401    0.5587
Pt    0.0625    0.3358    0.6042
Pt    0.0606    0.3849    0.5584
Pt    0.0580    0.3838    0.6031
Pt    0.0579    0.4281    0.5610
Pt    0.0592    0.4268    0.6034
Pt    0.0604    0.4735    0.5600
Pt    0.0593    0.4703    0.6040
Pt    0.1664    0.3388    0.6208
Pt    0.1231    0.4270    0.5787
Pt    0.1016    0.2953    0.6026
Pt    0.1020    0.3410    0.5579
Pt    0.1009    0.3381    0.5993
Pt    0.1053    0.3832    0.5592
Pt    0.1028    0.3842    0.6013
Pt    0.1008    0.4277    0.5594
Pt    0.1036    0.4278    0.6042
Pt    0.1020    0.4719    0.5568
Pt    0.1038    0.4714    0.6043
Pt    0.1689    0.3418    0.5801
Pt    0.1246    0.4271    0.5344
Pt    0.1440    0.2961    0.5992
Pt    0.1441    0.3401    0.6040
Pt    0.1462    0.3854    0.5585
Pt    0.1440    0.3840    0.6042
Pt    0.1455    0.4273    0.5586
Pt    0.1465    0.4246    0.6053
Pt    0.1467    0.4735    0.5584
Pt    0.1461    0.4711    0.6046
Pt    0.1671    0.2958    0.6208
Pt    0.2092    0.4247    0.5370
Pt    0.1900    0.2977    0.5960
Pt    0.1894    0.3409    0.6011
Pt    0.1892    0.3827    0.6011
Pt    0.1898    0.4279    0.5596
Pt    0.1900    0.4276    0.6013
Pt    0.1922    0.4699    0.5593
Pt    0.1891    0.4677    0.6033
Pt    0.2118    0.3847    0.6216
Pt    0.1233    0.4720    0.6247
Pt    0.2293    0.2957    0.5528
Pt    0.2308    0.2982    0.6026
Pt    0.2331    0.3419    0.5991
Pt    0.2318    0.3859    0.6001
Pt    0.2337    0.4282    0.6034
Pt    0.2359    0.4663    0.5594
Pt    0.1698    0.4694    0.5805
Pt    0.0391    0.2727    0.5600
Pt    0.0389    0.3187    0.5588
Pt    0.0411    0.3175    0.6039
Pt    0.0389    0.3615    0.5598
Pt    0.0368    0.3626    0.6015
Pt    0.0371    0.4064    0.5599
Pt    0.0365    0.4068    0.6027
Pt    0.0366    0.4504    0.5587
Pt    0.0383    0.4491    0.6031
Pt    0.0378    0.4924    0.5601
Pt    0.0381    0.4919    0.6044
Pt    0.0814    0.3173    0.5590
Pt    0.0753    0.3109    0.6068
Pt    0.0810    0.3628    0.5575
Pt    0.0799    0.3618    0.6015
Pt    0.0810    0.4066    0.5588
Pt    0.0810    0.4036    0.6034
Pt    0.0795    0.4483    0.5579
Pt    0.0826    0.4492    0.6032
Pt    0.0813    0.4942    0.5611
Pt    0.0805    0.4930    0.6035
Pt    0.1231    0.3191    0.6013
Pt    0.1266    0.3610    0.5598
Pt    0.1224    0.3624    0.6031
Pt    0.1245    0.4049    0.5557
Pt    0.1238    0.4055    0.6021
Pt    0.1238    0.4488    0.5576
Pt    0.1259    0.4490    0.6030
Pt    0.1260    0.4952    0.5593
Pt    0.1241    0.4924    0.6027
Pt    0.1688    0.2773    0.5962
Pt    0.1677    0.3174    0.5990
Pt    0.1676    0.3630    0.5583
Pt    0.1665    0.3635    0.6020
Pt    0.1686    0.4059    0.5573
Pt    0.1705    0.4071    0.6025
Pt    0.1688    0.4500    0.5596
Pt    0.1647    0.4459    0.6042
Pt    0.1704    0.4917    0.5574
Pt    0.1694    0.4928    0.6036
Pt    0.2108    0.2733    0.5560
Pt    0.2091    0.2764    0.6001
Pt    0.2122    0.3199    0.5980
Pt    0.2097    0.3635    0.6002
Pt    0.2125    0.4078    0.6011
Pt    0.2108    0.4475    0.5591
Pt    0.2126    0.4516    0.6042
Pt    0.2144    0.4896    0.5581
Pt    0.2133    0.4898    0.6035
Pt    0.2525    0.2743    0.5560
Pt    0.2547    0.2786    0.5984
Pt    0.2543    0.3211    0.5582
Pt    0.2532    0.3199    0.6007
Pt    0.2548    0.3655    0.5989
Pt    0.2538    0.4882    0.5552
Pt    0.0368    0.2974    0.5370
Pt    0.0411    0.2924    0.5824
Pt    0.0385    0.3408    0.5380
Pt    0.0378    0.3398    0.5814
Pt    0.0382    0.3422    0.6235
Pt    0.0354    0.3834    0.5376
Pt    0.0383    0.3836    0.5797
Pt    0.0354    0.3822    0.6247
Pt    0.0376    0.4276    0.5362
Pt    0.0375    0.4276    0.5817
Pt    0.0357    0.4266    0.6260
Pt    0.0365    0.4730    0.5378
Pt    0.0360    0.4697    0.5818
Pt    0.0369    0.4707    0.6254
Pt    0.1252    0.4706    0.5813
Pt    0.2105    0.3405    0.6225
Pt    0.2105    0.3420    0.5799
Pt    0.0802    0.2959    0.5389
Pt    0.0818    0.2979    0.5827
Pt    0.0793    0.3380    0.5365
Pt    0.0808    0.3386    0.5795
Pt    0.0818    0.3407    0.6248
Pt    0.0831    0.3849    0.5383
Pt    0.0818    0.3848    0.5818
Pt    0.0802    0.3817    0.6247
Pt    0.0812    0.4262    0.5364
Pt    0.0812    0.4275    0.5819
Pt    0.0792    0.4251    0.6252
Pt    0.0794    0.4715    0.5370
Pt    0.0820    0.4717    0.5836
Pt    0.0815    0.4704    0.6259
Pt    0.2098    0.2981    0.6232
Pt    0.1230    0.3837    0.6257
Pt    0.2119    0.2974    0.5777
Pt    0.1200    0.2964    0.6232
Pt    0.1226    0.3398    0.5372
Pt    0.1240    0.3392    0.5788
Pt    0.1220    0.3387    0.6243
Pt    0.1273    0.3823    0.5351
Pt    0.0165    0.4931    0.6254
Pt    0.0153    0.2948    0.5168
Pt    0.0151    0.4705    0.5609
Pt    0.1917    0.5135    0.6029
Pt    0.2365    0.5136    0.5602
Pt    0.0582    0.2939    0.5152
Pt    0.0354    0.4939    0.5155
Pt    0.0594    0.4720    0.5168
Pt    0.2291    0.2975    0.5164
Pt    0.1716    0.5141    0.5383
Pt    0.1711    0.5127    0.5816
Pt    0.0166    0.3624    0.5796
Pt    0.0196    0.2955    0.5638
Pt    0.0156    0.3401    0.5169
Pt    0.0159    0.3839    0.6033
Pt    0.1942    0.5135    0.5601
Pt    0.2137    0.5133    0.5371
Pt    0.0169    0.2757    0.5403
Pt    0.0162    0.3620    0.5372
Pt    0.1021    0.4285    0.5152
Pt    0.1693    0.4045    0.5152
Pt    0.2557    0.5125    0.5388
Pt    0.0829    0.4922    0.5158
Pt    0.2536    0.2766    0.5164
Pt    0.2154    0.5115    0.5819
Pt    0.0164    0.3174    0.5389
Pt    0.0163    0.4922    0.5829
Pt    0.0809    0.3627    0.5157
Pt    0.0185    0.3154    0.5858
Pt    0.1730    0.5130    0.6267
Pt    0.1706    0.4919    0.5152
Pt    0.0371    0.2730    0.5163
Pt    0.0591    0.3845    0.5167
Pt    0.0164    0.3403    0.5598
Pt    0.0356    0.3618    0.5153
Pt    0.0373    0.5138    0.6258
Pt    0.0366    0.3172    0.5162
Pt    0.0156    0.4065    0.6252
Pt    0.0791    0.3154    0.5164
Pt    0.1017    0.3371    0.5158
Pt    0.2535    0.2743    0.6419
Pt    0.2104    0.3388    0.7095
Pt    0.2329    0.3829    0.6432
Pt    0.2548    0.2970    0.7104
Pt    0.2566    0.2966    0.6647
Pt    0.2518    0.4728    0.7548
Pt    0.2069    0.4701    0.7538
Pt    0.1706    0.4740    0.6667
Pt    0.0561    0.2743    0.7089
Pt    0.0539    0.2760    0.7533
Pt    0.0561    0.3180    0.7529
Pt    0.0551    0.3619    0.6674
Pt    0.0551    0.4051    0.6705
Pt    0.0579    0.4485    0.6689
Pt    0.0566    0.4463    0.7143
Pt    0.0561    0.4919    0.6711
Pt    0.0580    0.4917    0.7134
Pt    0.0580    0.4904    0.7531
Pt    0.0990    0.2750    0.6659
Pt    0.0991    0.2762    0.7101
Pt    0.0990    0.2749    0.7555
Pt    0.0976    0.3175    0.6671
Pt    0.1019    0.3177    0.7096
Pt    0.0988    0.3177    0.7513
Pt    0.1011    0.3617    0.6667
Pt    0.0989    0.3635    0.7109
Pt    0.1008    0.3625    0.7531
Pt    0.1006    0.4059    0.6700
Pt    0.1005    0.4040    0.7119
Pt    0.1052    0.4493    0.6712
Pt    0.1036    0.4518    0.7134
Pt    0.1002    0.4918    0.6704
Pt    0.1001    0.4935    0.7128
Pt    0.1426    0.2732    0.6637
Pt    0.1458    0.2743    0.7096
Pt    0.1443    0.2753    0.7520
Pt    0.1458    0.3183    0.6674
Pt    0.1435    0.3209    0.7104
Pt    0.1455    0.3192    0.7540
Pt    0.1456    0.3627    0.6678
Pt    0.1456    0.3634    0.7100
Pt    0.1442    0.3647    0.7545
Pt    0.1452    0.4049    0.6686
Pt    0.1470    0.4074    0.7119
Pt    0.1409    0.4074    0.7555
Pt    0.1454    0.4477    0.6695
Pt    0.1454    0.4926    0.6719
Pt    0.1881    0.2732    0.6652
Pt    0.1874    0.2734    0.7086
Pt    0.1877    0.2745    0.7521
Pt    0.1882    0.3183    0.6654
Pt    0.1891    0.3166    0.7101
Pt    0.1877    0.3176    0.7534
Pt    0.1908    0.3624    0.6690
Pt    0.1912    0.3617    0.7087
Pt    0.1881    0.3622    0.7550
Pt    0.1920    0.4052    0.6675
Pt    0.1904    0.4079    0.7097
Pt    0.1878    0.4066    0.7562
Pt    0.1908    0.4513    0.6625
Pt    0.1851    0.4509    0.7100
Pt    0.1879    0.4482    0.7546
Pt    0.2328    0.2766    0.6650
Pt    0.2338    0.2744    0.7101
Pt    0.2328    0.2746    0.7508
Pt    0.2348    0.3200    0.6668
Pt    0.2339    0.3180    0.7106
Pt    0.2317    0.3176    0.7543
Pt    0.2334    0.3629    0.6651
Pt    0.2320    0.3634    0.7121
Pt    0.2320    0.3618    0.7533
Pt    0.2346    0.4079    0.6669
Pt    0.2321    0.4064    0.7105
Pt    0.2312    0.4078    0.7538
Pt    0.2312    0.4518    0.7101
Pt    0.2312    0.4483    0.7524
Pt    0.2270    0.4937    0.7582
Pt    0.2521    0.4716    0.7112
Pt    0.2104    0.3391    0.6665
Pt    0.2535    0.4283    0.7546
Pt    0.2110    0.2954    0.7521
Pt    0.2090    0.4285    0.7562
Pt    0.2545    0.4282    0.7094
Pt    0.2099    0.4309    0.7105
Pt    0.2551    0.4281    0.6659
Pt    0.2543    0.3839    0.7546
Pt    0.2543    0.3840    0.7128
Pt    0.0529    0.2963    0.7294
Pt    0.0564    0.3826    0.6465
Pt    0.0571    0.4254    0.6482
Pt    0.0560    0.4265    0.6934
Pt    0.0593    0.4691    0.6470
Pt    0.0559    0.4684    0.6934
Pt    0.0580    0.4685    0.7348
Pt    0.2104    0.4304    0.6682
Pt    0.2542    0.3851    0.6660
Pt    0.2119    0.3849    0.7565
Pt    0.0972    0.2987    0.6433
Pt    0.0998    0.2969    0.6888
Pt    0.1003    0.2957    0.7324
Pt    0.0996    0.3393    0.6478
Pt    0.0992    0.3397    0.6871
Pt    0.1017    0.3396    0.7312
Pt    0.0989    0.3820    0.6473
Pt    0.1026    0.3834    0.6894
Pt    0.1010    0.3830    0.7319
Pt    0.0998    0.4246    0.6485
Pt    0.1022    0.4265    0.6916
Pt    0.0995    0.4276    0.7321
Pt    0.1025    0.4720    0.6472
Pt    0.1016    0.4697    0.6925
Pt    0.2548    0.3405    0.7559
Pt    0.2123    0.2968    0.6680
Pt    0.1424    0.2971    0.6445
Pt    0.1438    0.2932    0.6874
Pt    0.1446    0.2975    0.7306
Pt    0.1431    0.3382    0.6451
Pt    0.1446    0.3406    0.6885
Pt    0.1461    0.3413    0.7335
Pt    0.1464    0.3808    0.6471
Pt    0.1468    0.3824    0.6894
Pt    0.1452    0.3849    0.7337
Pt    0.1467    0.4251    0.6449
Pt    0.1453    0.4288    0.6922
Pt    0.1447    0.4276    0.7331
Pt    0.1449    0.4714    0.6484
Pt    0.2104    0.2953    0.7093
Pt    0.1860    0.2951    0.6455
Pt    0.1879    0.2963    0.6856
Pt    0.1869    0.2957    0.7311
Pt    0.1888    0.3421    0.6449
Pt    0.1888    0.3381    0.6878
Pt    0.1887    0.3411    0.7311
Pt    0.1899    0.3820    0.6467
Pt    0.1917    0.3840    0.6906
Pt    0.1898    0.3855    0.7331
Pt    0.1904    0.4265    0.6441
Pt    0.1883    0.4285    0.6879
Pt    0.1900    0.4276    0.7340
Pt    0.2322    0.2989    0.6447
Pt    0.2340    0.2970    0.6882
Pt    0.2332    0.2965    0.7312
Pt    0.2325    0.3408    0.6446
Pt    0.2327    0.3399    0.6891
Pt    0.2334    0.3408    0.7326
Pt    0.0164    0.3639    0.6692
Pt    0.2325    0.3861    0.6900
Pt    0.2314    0.3858    0.7332
Pt    0.2324    0.4299    0.6456
Pt    0.2325    0.4295    0.6879
Pt    0.2324    0.4274    0.7316
Pt    0.2318    0.4722    0.7327
Pt    0.2544    0.3437    0.7124
Pt    0.0347    0.2713    0.7291
Pt    0.0346    0.3621    0.6462
Pt    0.0349    0.4047    0.6462
Pt    0.0332    0.4072    0.6907
Pt    0.0365    0.4485    0.6487
Pt    0.0351    0.4468    0.6919
Pt    0.0350    0.4474    0.7353
Pt    0.0383    0.4931    0.6474
Pt    0.0338    0.4935    0.6921
Pt    0.0343    0.4920    0.7346
Pt    0.0768    0.2752    0.6870
Pt    0.0771    0.2748    0.7311
Pt    0.0776    0.3176    0.6882
Pt    0.0765    0.3170    0.7315
Pt    0.0772    0.3614    0.6457
Pt    0.0815    0.3611    0.6890
Pt    0.0774    0.4043    0.6489
Pt    0.0777    0.4028    0.6911
Pt    0.0817    0.4494    0.6491
Pt    0.0811    0.4477    0.6929
Pt    0.0804    0.4486    0.7306
Pt    0.0787    0.4938    0.6474
Pt    0.0782    0.4918    0.6905
Pt    0.0806    0.4937    0.7364
Pt    0.0150    0.4726    0.6464
Pt    0.1210    0.2746    0.6886
Pt    0.1211    0.2753    0.7329
Pt    0.1195    0.3179    0.6457
Pt    0.1238    0.3162    0.6875
Pt    0.1235    0.3171    0.7318
Pt    0.1233    0.3605    0.6451
Pt    0.1212    0.3611    0.6904
Pt    0.1235    0.3619    0.7323
Pt    0.1219    0.4061    0.6495
Pt    0.1236    0.4052    0.6900
Pt    0.1243    0.4067    0.7328
Pt    0.1234    0.4484    0.6484
Pt    0.1275    0.4545    0.6940
Pt    0.1226    0.4922    0.6499
Pt    0.1204    0.4932    0.6907
Pt    0.1642    0.2748    0.6427
Pt    0.1657    0.2728    0.6881
Pt    0.1669    0.2746    0.7306
Pt    0.1650    0.3168    0.6430
Pt    0.1672    0.3175    0.6882
Pt    0.1671    0.3175    0.7315
Pt    0.1662    0.3596    0.6466
Pt    0.1673    0.3594    0.6881
Pt    0.1672    0.3634    0.7331
Pt    0.1692    0.4030    0.6451
Pt    0.1687    0.4050    0.6887
Pt    0.1671    0.4079    0.7311
Pt    0.1665    0.4528    0.6485
Pt    0.1656    0.4507    0.6892
Pt    0.1652    0.4945    0.6471
Pt    0.2110    0.2765    0.6441
Pt    0.2107    0.2752    0.6886
Pt    0.2109    0.2735    0.7305
Pt    0.2085    0.3178    0.6444
Pt    0.2107    0.3190    0.6874
Pt    0.2109    0.3178    0.7307
Pt    0.2123    0.3607    0.6440
Pt    0.2128    0.3637    0.6891
Pt    0.2102    0.3608    0.7353
Pt    0.2135    0.4069    0.6448
Pt    0.2113    0.4079    0.6893
Pt    0.2106    0.4090    0.7322
Pt    0.2082    0.4524    0.6904
Pt    0.2092    0.4490    0.7335
Pt    0.1655    0.4287    0.7537
Pt    0.2557    0.2751    0.6866
Pt    0.2548    0.2753    0.7306
Pt    0.2562    0.3193    0.6450
Pt    0.2551    0.3198    0.6901
Pt    0.2544    0.3206    0.7326
Pt    0.2553    0.3619    0.6430
Pt    0.2524    0.3634    0.6899
Pt    0.2549    0.3634    0.7350
Pt    0.2550    0.4066    0.6442
Pt    0.2555    0.4063    0.6891
Pt    0.2557    0.4070    0.7315
Pt    0.2524    0.4514    0.6868
Pt    0.2522    0.4503    0.7313
Pt    0.2536    0.4928    0.7323
Pt    0.0344    0.2979    0.7532
Pt    0.0363    0.3844    0.6689
Pt    0.0343    0.4277    0.6681
Pt    0.0331    0.4284    0.7142
Pt    0.0364    0.4697    0.6683
Pt    0.0360    0.4708    0.7141
Pt    0.0369    0.4681    0.7573
Pt    0.2555    0.3429    0.6656
Pt    0.2121    0.3845    0.7118
Pt    0.1656    0.4326    0.7141
Pt    0.0786    0.2962    0.7108
Pt    0.0745    0.2965    0.7525
Pt    0.0777    0.3411    0.6656
Pt    0.0803    0.3380    0.7103
Pt    0.0778    0.3420    0.7523
Pt    0.0786    0.3828    0.6685
Pt    0.0778    0.4259    0.6710
Pt    0.0737    0.4216    0.7152
Pt    0.0804    0.4676    0.6700
Pt    0.0794    0.4715    0.7141
Pt    0.2121    0.3848    0.6666
Pt    0.2098    0.3372    0.7540
Pt    0.1200    0.2966    0.6666
Pt    0.1224    0.2955    0.7101
Pt    0.1231    0.2977    0.7527
Pt    0.1245    0.3379    0.6686
Pt    0.1210    0.3398    0.7092
Pt    0.1241    0.3404    0.7518
Pt    0.1228    0.3828    0.6683
Pt    0.1253    0.3850    0.7114
Pt    0.1215    0.3834    0.7537
Pt    0.1249    0.4269    0.6703
Pt    0.1215    0.4282    0.7128
Pt    0.1235    0.4726    0.6720
Pt    0.2547    0.2970    0.7526
Pt    0.1665    0.2934    0.6663
Pt    0.1667    0.2958    0.7089
Pt    0.1652    0.2979    0.7531
Pt    0.1686    0.3391    0.6675
Pt    0.1667    0.3402    0.7118
Pt    0.1669    0.3423    0.7529
Pt    0.1691    0.3831    0.6678
Pt    0.1679    0.3842    0.7100
Pt    0.1681    0.3844    0.7585
Pt    0.1677    0.4283    0.6668
Pt    0.2305    0.5118    0.7340
Pt    0.0168    0.2727    0.7512
Pt    0.1216    0.5143    0.6709
Pt    0.1190    0.2751    0.6427
Pt    0.0194    0.2961    0.7292
Pt    0.0586    0.5127    0.7349
Pt    0.0574    0.5142    0.6931
Pt    0.0374    0.5138    0.7145
Pt    0.0359    0.5138    0.6672
Pt    0.2110    0.3844    0.8403
Pt    0.2520    0.4281    0.8872
Pt    0.2095    0.2963    0.7953
Pt    0.2538    0.4703    0.8415
Pt    0.2529    0.4712    0.7967
Pt    0.1898    0.2757    0.8869
Pt    0.2116    0.3411    0.8838
Pt    0.2535    0.4303    0.8415
Pt    0.2528    0.4273    0.7976
Pt    0.0565    0.2751    0.7991
Pt    0.0575    0.2729    0.8447
Pt    0.0597    0.3183    0.7974
Pt    0.0533    0.3196    0.8435
Pt    0.0587    0.3622    0.8389
Pt    0.0569    0.3625    0.8854
Pt    0.0590    0.4042    0.8381
Pt    0.0600    0.4043    0.8838
Pt    0.0603    0.4489    0.8368
Pt    0.0596    0.4474    0.8833
Pt    0.0588    0.4925    0.7977
Pt    0.0584    0.4930    0.8388
Pt    0.0600    0.4938    0.8843
Pt    0.0994    0.2748    0.7965
Pt    0.1009    0.2751    0.8418
Pt    0.0985    0.2773    0.8885
Pt    0.0988    0.3194    0.7979
Pt    0.1009    0.3210    0.8432
Pt    0.0996    0.3193    0.8873
Pt    0.1014    0.3603    0.7975
Pt    0.1004    0.3622    0.8413
Pt    0.1016    0.3618    0.8841
Pt    0.1008    0.4083    0.8002
Pt    0.1000    0.4047    0.8429
Pt    0.1019    0.4055    0.8842
Pt    0.1049    0.4490    0.8364
Pt    0.1029    0.4494    0.8841
Pt    0.1023    0.4941    0.8388
Pt    0.1032    0.4935    0.8836
Pt    0.1447    0.2752    0.7958
Pt    0.1446    0.2756    0.8400
Pt    0.1457    0.2756    0.8865
Pt    0.1454    0.3193    0.7979
Pt    0.1468    0.3187    0.8411
Pt    0.1454    0.3190    0.8862
Pt    0.1445    0.3601    0.7976
Pt    0.1466    0.3626    0.8405
Pt    0.1458    0.3630    0.8853
Pt    0.1446    0.4053    0.7990
Pt    0.1436    0.4046    0.8410
Pt    0.1457    0.4046    0.8844
Pt    0.1438    0.4506    0.8389
Pt    0.1439    0.4516    0.8828
Pt    0.1488    0.4924    0.8833
Pt    0.1880    0.2744    0.7958
Pt    0.1896    0.2744    0.8420
Pt    0.0160    0.2756    0.7989
Pt    0.1883    0.3192    0.7978
Pt    0.1902    0.3181    0.8411
Pt    0.1895    0.3193    0.8830
Pt    0.1905    0.3604    0.7991
Pt    0.1894    0.3624    0.8408
Pt    0.1900    0.3615    0.8853
Pt    0.1867    0.4052    0.7962
Pt    0.1901    0.4089    0.8410
Pt    0.1880    0.4074    0.8836
Pt    0.1882    0.4490    0.7991
Pt    0.1862    0.4497    0.8391
Pt    0.1882    0.4485    0.8858
Pt    0.2331    0.2757    0.7978
Pt    0.2338    0.2753    0.8435
Pt    0.2328    0.2757    0.8862
Pt    0.2326    0.3159    0.7957
Pt    0.2343    0.3174    0.8408
Pt    0.2329    0.3198    0.8844
Pt    0.2323    0.3619    0.7981
Pt    0.2315    0.3638    0.8421
Pt    0.2318    0.3624    0.8842
Pt    0.2334    0.4066    0.7980
Pt    0.2320    0.4095    0.8423
Pt    0.2316    0.4077    0.8871
Pt    0.2309    0.4499    0.7984
Pt    0.2323    0.4509    0.8413
Pt    0.2311    0.4972    0.7983
Pt    0.2121    0.3833    0.7995
Pt    0.2100    0.2968    0.8851
Pt    0.0156    0.4924    0.7951
Pt    0.2543    0.3842    0.8410
Pt    0.2549    0.3856    0.7977
Pt    0.2557    0.3416    0.8883
Pt    0.2552    0.3394    0.8421
Pt    0.2547    0.3398    0.7977
Pt    0.0552    0.2982    0.7747
Pt    0.0556    0.2949    0.8222
Pt    0.0569    0.3373    0.7751
Pt    0.0569    0.3385    0.8218
Pt    0.0562    0.3407    0.8646
Pt    0.0586    0.3824    0.8619
Pt    0.0604    0.4278    0.8588
Pt    0.0594    0.4710    0.8173
Pt    0.0605    0.4711    0.8619
Pt    0.2562    0.2980    0.8861
Pt    0.2557    0.2967    0.8406
Pt    0.0990    0.2962    0.7760
Pt    0.0993    0.2953    0.8200
Pt    0.1010    0.2984    0.8633
Pt    0.1011    0.3394    0.7744
Pt    0.0987    0.3403    0.8200
Pt    0.1033    0.3395    0.8645
Pt    0.1001    0.3842    0.7766
Pt    0.0987    0.3844    0.8173
Pt    0.1019    0.3820    0.8617
Pt    0.1010    0.4284    0.8603
Pt    0.1023    0.4714    0.8618
Pt    0.2534    0.2967    0.7967
Pt    0.1434    0.2947    0.7745
Pt    0.1428    0.2986    0.8173
Pt    0.1452    0.2969    0.8644
Pt    0.1445    0.3409    0.7748
Pt    0.1461    0.3405    0.8194
Pt    0.1476    0.3401    0.8637
Pt    0.1436    0.3838    0.7781
Pt    0.1449    0.3844    0.8185
Pt    0.1447    0.3835    0.8630
Pt    0.1405    0.4302    0.7787
Pt    0.1440    0.4267    0.8198
Pt    0.1472    0.4266    0.8626
Pt    0.1456    0.4743    0.8606
Pt    0.2109    0.2954    0.8405
Pt    0.1870    0.2978    0.7748
Pt    0.1901    0.2971    0.8187
Pt    0.1896    0.2958    0.8644
Pt    0.1880    0.3411    0.7764
Pt    0.1899    0.3396    0.8206
Pt    0.1892    0.3407    0.8613
Pt    0.1906    0.3822    0.7780
Pt    0.1888    0.3848    0.8204
Pt    0.1915    0.3861    0.8620
Pt    0.1864    0.4275    0.7770
Pt    0.1890    0.4287    0.8180
Pt    0.1885    0.4301    0.8615
Pt    0.1881    0.4692    0.7784
Pt    0.1901    0.4715    0.8178
Pt    0.1903    0.4678    0.8615
Pt    0.2320    0.2957    0.7747
Pt    0.2336    0.2970    0.8202
Pt    0.2358    0.2988    0.8644
Pt    0.2324    0.3406    0.7757
Pt    0.2331    0.3397    0.8210
Pt    0.2314    0.3395    0.8613
Pt    0.2333    0.3854    0.7758
Pt    0.2335    0.3843    0.8202
Pt    0.2313    0.3862    0.8637
Pt    0.2303    0.4278    0.7764
Pt    0.2316    0.4284    0.8195
Pt    0.2333    0.4295    0.8653
Pt    0.2322    0.4710    0.7751
Pt    0.2353    0.4751    0.8179
Pt    0.2111    0.3387    0.7992
Pt    0.0349    0.2739    0.7765
Pt    0.0354    0.3184    0.8185
Pt    0.0366    0.3617    0.8613
Pt    0.0397    0.4048    0.8605
Pt    0.0375    0.4487    0.8182
Pt    0.0382    0.4491    0.8614
Pt    0.0388    0.4907    0.7754
Pt    0.0367    0.4949    0.8171
Pt    0.0351    0.4949    0.8579
Pt    0.0764    0.2752    0.7764
Pt    0.0786    0.2766    0.8204
Pt    0.0820    0.2747    0.8635
Pt    0.0802    0.3187    0.7740
Pt    0.0787    0.3163    0.8214
Pt    0.0786    0.3207    0.8637
Pt    0.0795    0.3601    0.7751
Pt    0.0780    0.3647    0.8163
Pt    0.0787    0.3609    0.8610
Pt    0.0797    0.4040    0.8626
Pt    0.0822    0.4507    0.8600
Pt    0.0806    0.4928    0.8184
Pt    0.0812    0.4923    0.8587
Pt    0.1214    0.2737    0.7741
Pt    0.1230    0.2759    0.8179
Pt    0.1240    0.2764    0.8634
Pt    0.1215    0.3171    0.7754
Pt    0.1205    0.3184    0.8181
Pt    0.1255    0.3195    0.8640
Pt    0.1227    0.3626    0.7772
Pt    0.1216    0.3619    0.8192
Pt    0.1252    0.3607    0.8631
Pt    0.1200    0.4061    0.7766
Pt    0.1233    0.4060    0.8208
Pt    0.1242    0.4049    0.8629
Pt    0.1237    0.4495    0.8603
Pt    0.1240    0.4943    0.8610
Pt    0.1654    0.2752    0.7741
Pt    0.1680    0.2764    0.8201
Pt    0.1689    0.2737    0.8631
Pt    0.1663    0.3196    0.7762
Pt    0.1671    0.3156    0.8190
Pt    0.1671    0.3197    0.8638
Pt    0.1660    0.3619    0.7757
Pt    0.1681    0.3627    0.8196
Pt    0.1678    0.3636    0.8608
Pt    0.1639    0.4077    0.7763
Pt    0.1667    0.4063    0.8199
Pt    0.1675    0.4058    0.8609
Pt    0.1654    0.4489    0.7777
Pt    0.1628    0.4506    0.8161
Pt    0.1649    0.4499    0.8611
Pt    0.1718    0.4903    0.8620
Pt    0.2081    0.2744    0.7736
Pt    0.2105    0.2745    0.8192
Pt    0.2109    0.2734    0.8646
Pt    0.2088    0.3199    0.7752
Pt    0.2124    0.3173    0.8206
Pt    0.2120    0.3161    0.8617
Pt    0.2114    0.3608    0.7770
Pt    0.2115    0.3615    0.8203
Pt    0.2112    0.3635    0.8628
Pt    0.2089    0.4047    0.7776
Pt    0.2105    0.4057    0.8193
Pt    0.2111    0.4069    0.8641
Pt    0.2097    0.4501    0.7761
Pt    0.2110    0.4498    0.8215
Pt    0.2163    0.4529    0.8683
Pt    0.2134    0.4910    0.8198
Pt    0.2534    0.2758    0.7736
Pt    0.2543    0.2741    0.8200
Pt    0.2565    0.2753    0.8648
Pt    0.2549    0.3171    0.7752
Pt    0.2546    0.3187    0.8200
Pt    0.2563    0.3214    0.8664
Pt    0.2539    0.3629    0.7769
Pt    0.2547    0.3629    0.8184
Pt    0.2545    0.3622    0.8622
Pt    0.2538    0.4061    0.7753
Pt    0.2542    0.4067    0.8189
Pt    0.2555    0.4070    0.8610
Pt    0.2529    0.4503    0.7751
Pt    0.2561    0.4517    0.8184
Pt    0.2558    0.4505    0.8647
Pt    0.2525    0.4939    0.7783
Pt    0.0381    0.2965    0.7985
Pt    0.0372    0.3846    0.8833
Pt    0.0387    0.4256    0.8383
Pt    0.0385    0.4260    0.8822
Pt    0.0359    0.4703    0.7979
Pt    0.0391    0.4691    0.8398
Pt    0.0379    0.4716    0.8832
Pt    0.2106    0.3400    0.8415
Pt    0.2094    0.4707    0.8407
Pt    0.2120    0.4726    0.7975
Pt    0.0777    0.2960    0.7972
Pt    0.0772    0.2957    0.8420
Pt    0.0767    0.3410    0.7981
Pt    0.0776    0.3400    0.8420
Pt    0.0778    0.3398    0.8842
Pt    0.0800    0.3848    0.8392
Pt    0.0796    0.3815    0.8838
Pt    0.0810    0.4280    0.8369
Pt    0.0813    0.4265    0.8826
Pt    0.0818    0.4715    0.8380
Pt    0.0808    0.4718    0.8835
Pt    0.2091    0.4286    0.8849
Pt    0.2117    0.4294    0.8433
Pt    0.1217    0.2952    0.7967
Pt    0.1216    0.2979    0.8415
Pt    0.1201    0.2975    0.8844
Pt    0.1228    0.3377    0.7973
Pt    0.1262    0.3420    0.8412
Pt    0.1238    0.3390    0.8865
Pt    0.1211    0.3843    0.7984
Pt    0.1218    0.3833    0.8396
Pt    0.1225    0.3847    0.8861
Pt    0.1214    0.4285    0.7998
Pt    0.1224    0.4266    0.8422
Pt    0.1235    0.4283    0.8839
Pt    0.1244    0.4732    0.8396
Pt    0.1240    0.4736    0.8847
Pt    0.2099    0.4280    0.7984
Pt    0.2094    0.3844    0.8870
Pt    0.1660    0.2960    0.7994
Pt    0.1686    0.2970    0.8430
Pt    0.1663    0.2962    0.8851
Pt    0.1688    0.3415    0.7990
Pt    0.1693    0.3406    0.8398
Pt    0.1678    0.3408    0.8859
Pt    0.1668    0.3832    0.7963
Pt    0.1657    0.3850    0.8407
Pt    0.1679    0.3839    0.8821
Pt    0.1660    0.4276    0.7978
Pt    0.1670    0.4286    0.8389
Pt    0.1662    0.4275    0.8827
Pt    0.1681    0.4732    0.8392
Pt    0.1689    0.4716    0.8855
Pt    0.2533    0.3853    0.8857
Pt    0.0174    0.3840    0.8600
Pt    0.0163    0.3615    0.8835
Pt    0.0170    0.4468    0.8400
Pt    0.0170    0.4264    0.8616
Pt    0.0167    0.4940    0.8819
Pt    0.0164    0.4703    0.8198
Pt    0.0169    0.4072    0.8400
Pt    0.1261    0.5131    0.8378
Pt    0.0172    0.4503    0.8820
Pt    0.1714    0.5139    0.8833
Pt    0.1502    0.5110    0.8606
Pt    0.0187    0.4690    0.8596
Pt    0.1019    0.5131    0.8617
Pt    0.2530    0.3877    0.9298
Pt    0.2542    0.3414    0.9734
Pt    0.2549    0.3418    0.9291
Pt    0.2531    0.2992    0.9759
Pt    0.2554    0.2975    0.9307
Pt    0.1243    0.4716    0.9716
Pt    0.2122    0.4691    0.9704
Pt    0.2113    0.3825    0.9277
Pt    0.2146    0.3445    0.9727
Pt    0.0581    0.3131    0.9697
Pt    0.0600    0.3554    0.9275
Pt    0.0598    0.3587    0.9697
Pt    0.0598    0.4026    0.9282
Pt    0.0562    0.4034    0.9698
Pt    0.0591    0.4485    0.9275
Pt    0.0592    0.4477    0.9712
Pt    0.0588    0.4930    0.9264
Pt    0.0584    0.4936    0.9705
Pt    0.1029    0.3608    0.9302
Pt    0.1024    0.3578    0.9718
Pt    0.1030    0.4036    0.9285
Pt    0.1033    0.4050    0.9716
Pt    0.1036    0.4498    0.9273
Pt    0.1027    0.4482    0.9717
Pt    0.1029    0.4915    0.9265
Pt    0.1042    0.4970    0.9720
Pt    0.1430    0.2747    0.9306
Pt    0.1465    0.3185    0.9291
Pt    0.1477    0.3600    0.9278
Pt    0.1464    0.3612    0.9725
Pt    0.1484    0.4040    0.9265
Pt    0.1468    0.4043    0.9704
Pt    0.1467    0.4499    0.9296
Pt    0.1446    0.4477    0.9712
Pt    0.1484    0.4924    0.9274
Pt    0.1484    0.4935    0.9709
Pt    0.1891    0.2744    0.9314
Pt    0.1913    0.2726    0.9713
Pt    0.1890    0.3186    0.9289
Pt    0.1893    0.3202    0.9718
Pt    0.1906    0.3610    0.9305
Pt    0.1884    0.3580    0.9729
Pt    0.1907    0.4060    0.9285
Pt    0.1890    0.4066    0.9702
Pt    0.1959    0.4500    0.9317
Pt    0.1918    0.4479    0.9715
Pt    0.1902    0.4900    0.9288
Pt    0.1938    0.4926    0.9691
Pt    0.2326    0.2785    0.9297
Pt    0.2319    0.2767    0.9740
Pt    0.2321    0.3193    0.9298
Pt    0.2323    0.3219    0.9725
Pt    0.2344    0.3626    0.9279
Pt    0.2311    0.4065    0.9292
Pt    0.2333    0.4917    0.9712
Pt    0.1942    0.5130    0.9501
Pt    0.2104    0.3393    0.9312
Pt    0.2113    0.2991    0.9724
Pt    0.2090    0.2978    0.9298
Pt    0.1253    0.4719    0.9270
Pt    0.1250    0.4269    0.9697
Pt    0.1717    0.4708    0.9715
Pt    0.1688    0.4696    0.9306
Pt    0.1663    0.4260    0.9728
Pt    0.1698    0.4293    0.9282
Pt    0.1704    0.3844    0.9721
Pt    0.1693    0.3836    0.9295
Pt    0.1655    0.3392    0.9752
Pt    0.1691    0.3390    0.9274
Pt    0.1654    0.2959    0.9298
Pt    0.1262    0.4276    0.9276
Pt    0.0605    0.2914    0.9966
Pt    0.0595    0.3379    0.9058
Pt    0.0574    0.3332    0.9480
Pt    0.0588    0.3368    0.9912
Pt    0.0585    0.3818    0.9074
Pt    0.0579    0.3811    0.9475
Pt    0.0603    0.3814    0.9928
Pt    0.0581    0.4249    0.9054
Pt    0.0581    0.4262    0.9488
Pt    0.0598    0.4244    0.9931
Pt    0.0602    0.4718    0.9044
Pt    0.0589    0.4703    0.9497
Pt    0.0578    0.4691    0.9956
Pt    0.1251    0.3830    0.9732
Pt    0.1250    0.3816    0.9306
Pt    0.1240    0.3361    0.9744
Pt    0.1016    0.2987    0.9088
Pt    0.1035    0.3385    0.9095
Pt    0.1027    0.3362    0.9515
Pt    0.0999    0.3366    0.9927
Pt    0.1036    0.3842    0.9070
Pt    0.1042    0.3836    0.9524
Pt    0.1017    0.3810    0.9919
Pt    0.1031    0.4267    0.9064
Pt    0.1023    0.4288    0.9477
Pt    0.1025    0.4273    0.9914
Pt    0.1017    0.4715    0.9053
Pt    0.1020    0.4709    0.9504
Pt    0.1039    0.4728    0.9915
Pt    0.1239    0.3386    0.9315
Pt    0.1227    0.2984    0.9303
Pt    0.0804    0.4697    0.9731
Pt    0.1466    0.2967    0.9075
Pt    0.1457    0.3401    0.9072
Pt    0.1460    0.3364    0.9522
Pt    0.1479    0.3827    0.9065
Pt    0.1454    0.3835    0.9495
Pt    0.1435    0.3800    0.9949
Pt    0.1459    0.4275    0.9062
Pt    0.1457    0.4262    0.9499
Pt    0.1475    0.4245    0.9934
Pt    0.1449    0.4706    0.9064
Pt    0.1478    0.4707    0.9530
Pt    0.1468    0.4700    0.9912
Pt    0.0802    0.4692    0.9286
Pt    0.0818    0.4262    0.9705
Pt    0.0791    0.4248    0.9273
Pt    0.1883    0.2973    0.9086
Pt    0.1894    0.2969    0.9520
Pt    0.1899    0.3399    0.9056
Pt    0.1879    0.3396    0.9511
Pt    0.1881    0.3840    0.9059
Pt    0.1908    0.3843    0.9496
Pt    0.1920    0.4320    0.9092
Pt    0.1927    0.4267    0.9496
Pt    0.1899    0.4262    0.9926
Pt    0.1912    0.4669    0.9072
Pt    0.1904    0.4711    0.9511
Pt    0.1915    0.4716    0.9935
Pt    0.0812    0.3835    0.9692
Pt    0.0808    0.3800    0.9295
Pt    0.0782    0.3338    0.9697
Pt    0.2300    0.2974    0.9076
Pt    0.2334    0.2995    0.9508
Pt    0.2333    0.2991    0.9960
Pt    0.2319    0.3395    0.9088
Pt    0.2326    0.3416    0.9488
Pt    0.2350    0.3860    0.9061
Pt    0.2275    0.4313    0.9068
Pt    0.2335    0.4700    0.9938
Pt    0.0151    0.3599    0.9270
Pt    0.0359    0.2742    0.9944
Pt    0.0339    0.3173    0.9483
Pt    0.0386    0.3144    0.9922
Pt    0.0367    0.3583    0.9060
Pt    0.0375    0.3594    0.9490
Pt    0.0382    0.3584    0.9910
Pt    0.0383    0.4047    0.9055
Pt    0.0367    0.4034    0.9479
Pt    0.0384    0.4023    0.9930
Pt    0.0383    0.4500    0.9043
Pt    0.0374    0.4495    0.9488
Pt    0.0382    0.4474    0.9934
Pt    0.0381    0.4918    0.9052
Pt    0.0385    0.4924    0.9502
Pt    0.0390    0.4924    0.9933
Pt    0.0791    0.3156    0.9917
Pt    0.0819    0.3605    0.9063
Pt    0.0800    0.3580    0.9496
Pt    0.0792    0.3599    0.9933
Pt    0.0820    0.4031    0.9042
Pt    0.0815    0.4046    0.9500
Pt    0.0818    0.4030    0.9931
Pt    0.0803    0.4479    0.9057
Pt    0.0794    0.4497    0.9511
Pt    0.0819    0.4488    0.9919
Pt    0.0814    0.4936    0.9059
Pt    0.0802    0.4920    0.9517
Pt    0.0819    0.4932    0.9911
Pt    0.1234    0.2793    0.9073
Pt    0.1238    0.3182    0.9084
Pt    0.1245    0.3627    0.9083
Pt    0.1232    0.3599    0.9516
Pt    0.1243    0.3581    0.9933
Pt    0.1247    0.4053    0.9063
Pt    0.1242    0.4069    0.9484
Pt    0.1247    0.4054    0.9954
Pt    0.1225    0.4491    0.9069
Pt    0.1239    0.4506    0.9502
Pt    0.1242    0.4488    0.9943
Pt    0.1243    0.4927    0.9071
Pt    0.1255    0.4939    0.9498
Pt    0.1282    0.4941    0.9914
Pt    0.1671    0.2751    0.9104
Pt    0.1666    0.2765    0.9520
Pt    0.1659    0.3164    0.9059
Pt    0.1663    0.3169    0.9532
Pt    0.1695    0.3611    0.9084
Pt    0.1676    0.3609    0.9511
Pt    0.1668    0.3622    0.9928
Pt    0.1686    0.4073    0.9062
Pt    0.1692    0.4071    0.9494
Pt    0.1695    0.4056    0.9932
Pt    0.1674    0.4479    0.9057
Pt    0.1696    0.4473    0.9530
Pt    0.1711    0.4486    0.9943
Pt    0.1706    0.4899    0.9063
Pt    0.1702    0.4929    0.9508
Pt    0.1685    0.4920    0.9942
Pt    0.2113    0.2744    0.9090
Pt    0.2130    0.2736    0.9534
Pt    0.2106    0.3205    0.9038
Pt    0.2109    0.3189    0.9519
Pt    0.2110    0.3193    0.9912
Pt    0.2104    0.3608    0.9059
Pt    0.2119    0.3631    0.9504
Pt    0.2101    0.4073    0.9068
Pt    0.2115    0.4475    0.9945
Pt    0.2139    0.4897    0.9455
Pt    0.2138    0.4918    0.9964
Pt    0.2534    0.2762    0.9074
Pt    0.2557    0.2783    0.9535
Pt    0.2546    0.2761    0.9940
Pt    0.2539    0.3189    0.9070
Pt    0.2545    0.3199    0.9505
Pt    0.2534    0.3646    0.9074
Pt    0.2517    0.3629    0.9538
Pt    0.2562    0.4108    0.9090
Pt    0.2552    0.4915    0.9921
Pt    0.0357    0.2929    0.9716
Pt    0.0345    0.3354    0.9261
Pt    0.0373    0.3369    0.9703
Pt    0.0368    0.3818    0.9257
Pt    0.0369    0.3821    0.9691
Pt    0.0376    0.4287    0.9291
Pt    0.0374    0.4281    0.9715
Pt    0.0365    0.4696    0.9273
Pt    0.0378    0.4702    0.9734
Pt    0.0824    0.3368    0.9293
Pt    0.0594    0.3592    0.0146
Pt    0.0157    0.3846    0.9058
Pt    0.0159    0.4714    0.9500
Pt    0.0159    0.4935    0.9712
Pt    0.0165    0.4033    0.0137
Pt    0.0803    0.3367    0.0146
Pt    0.0170    0.4239    0.9921
Pt    0.0154    0.2948    0.9938
Pt    0.0176    0.4274    0.9050
Pt    0.0158    0.4916    0.9271
Pt    0.1214    0.3386    0.0142
Pt    0.0601    0.5141    0.9945
Pt    0.1479    0.4476    0.0130
Pt    0.0361    0.3807    0.0141
Pt    0.0168    0.3374    0.9918
Pt    0.0171    0.4707    0.9925
Pt    0.0383    0.4244    0.0142
Pt    0.1912    0.5123    0.9074
Pt    0.1035    0.4930    0.0121
Pt    0.0156    0.4710    0.9046
Pt    0.0378    0.3373    0.0135
Pt    0.1029    0.4053    0.0145
Pt    0.0165    0.5140    0.9049
Pt    0.0175    0.4907    0.0130
Pt    0.0156    0.3598    0.9698
Pt    0.0817    0.4274    0.0140
Pt    0.0151    0.3805    0.9500
Pt    0.1243    0.4729    0.0140
Pt    0.1927    0.5127    0.9941
Pt    0.1275    0.5134    0.9287
Pt    0.1494    0.5140    0.9058
Pt    0.2307    0.2734    0.0126
Pt    0.0153    0.4058    0.9266
Pt    0.1706    0.5133    0.9274
Pt    0.0152    0.5131    0.9480
Pt    0.1466    0.4026    0.0136
Pt    0.1009    0.4516    0.0140
Pt    0.0153    0.4040    0.9704
Pt    0.0812    0.3820    0.0145
Pt    0.0579    0.4026    0.0147
Pt    0.0174    0.3587    0.0148
Pt    0.2553    0.7326    0.1034
Pt    0.2558    0.7314    0.0562
Pt    0.1258    0.6032    0.0154
Pt    0.2554    0.6900    0.0999
Pt    0.2526    0.6851    0.0577
Pt    0.2567    0.6428    0.1014
Pt    0.2094    0.7321    0.1001
Pt    0.2117    0.7317    0.0565
Pt    0.2113    0.6892    0.1001
Pt    0.2120    0.6865    0.0556
Pt    0.2150    0.6430    0.0987
Pt    0.2128    0.5568    0.0588
Pt    0.1928    0.5795    0.0166
Pt    0.1673    0.7320    0.1005
Pt    0.1690    0.6887    0.0995
Pt    0.1233    0.6906    0.0564
Pt    0.0576    0.5378    0.0609
Pt    0.0605    0.5368    0.1040
Pt    0.1245    0.6463    0.1003
Pt    0.0594    0.5810    0.0593
Pt    0.0586    0.5803    0.1020
Pt    0.1266    0.6476    0.0576
Pt    0.0588    0.6228    0.0572
Pt    0.0607    0.6230    0.1039
Pt    0.1255    0.6000    0.1007
Pt    0.0587    0.6677    0.0598
Pt    0.0589    0.6691    0.1016
Pt    0.1254    0.6026    0.0595
Pt    0.0600    0.7122    0.0588
Pt    0.1259    0.5580    0.1036
Pt    0.1033    0.5357    0.0594
Pt    0.1017    0.5349    0.1027
Pt    0.1273    0.5570    0.0575
Pt    0.1032    0.5794    0.0604
Pt    0.1024    0.5803    0.0996
Pt    0.0802    0.6930    0.0991
Pt    0.1045    0.6249    0.0568
Pt    0.1034    0.6239    0.1024
Pt    0.0804    0.6897    0.0582
Pt    0.1040    0.6704    0.0574
Pt    0.1022    0.6685    0.0986
Pt    0.0812    0.6466    0.1019
Pt    0.1475    0.5348    0.0599
Pt    0.1492    0.5361    0.1026
Pt    0.0802    0.6447    0.0561
Pt    0.1481    0.5797    0.0580
Pt    0.1485    0.5800    0.1002
Pt    0.0810    0.6024    0.1014
Pt    0.1480    0.6237    0.0577
Pt    0.1465    0.6215    0.0995
Pt    0.0591    0.5146    0.1234
Pt    0.1470    0.6682    0.0560
Pt    0.1453    0.6677    0.0987
Pt    0.1455    0.7122    0.1017
Pt    0.1462    0.7517    0.0991
Pt    0.0807    0.6014    0.0576
Pt    0.1896    0.5342    0.0594
Pt    0.1925    0.5349    0.1049
Pt    0.0804    0.5561    0.1015
Pt    0.1929    0.5787    0.0591
Pt    0.1934    0.5787    0.1000
Pt    0.0803    0.5565    0.0602
Pt    0.1921    0.6232    0.0579
Pt    0.1922    0.6234    0.0986
Pt    0.1913    0.6673    0.0572
Pt    0.1902    0.6655    0.0991
Pt    0.1930    0.7084    0.0558
Pt    0.1894    0.7100    0.1000
Pt    0.1905    0.7545    0.0580
Pt    0.1888    0.7538    0.0985
Pt    0.0578    0.6240    0.0154
Pt    0.2331    0.5359    0.0624
Pt    0.2360    0.6224    0.0995
Pt    0.2340    0.6637    0.1013
Pt    0.2351    0.7087    0.0563
Pt    0.2339    0.7117    0.1005
Pt    0.0790    0.6430    0.0152
Pt    0.2337    0.7537    0.0588
Pt    0.2348    0.7541    0.1004
Pt    0.1688    0.6892    0.0577
Pt    0.1689    0.6440    0.0994
Pt    0.1702    0.6448    0.0572
Pt    0.0152    0.7126    0.0597
Pt    0.1706    0.6009    0.1002
Pt    0.1692    0.6013    0.0587
Pt    0.0366    0.7326    0.0590
Pt    0.1701    0.5588    0.1021
Pt    0.1703    0.5563    0.0593
Pt    0.1005    0.6669    0.0153
Pt    0.1228    0.7317    0.0975
Pt    0.1244    0.6902    0.0999
Pt    0.1483    0.5147    0.0377
Pt    0.0571    0.5595    0.0377
Pt    0.0575    0.5566    0.0819
Pt    0.0579    0.5565    0.1238
Pt    0.0598    0.6024    0.0349
Pt    0.0586    0.6027    0.0819
Pt    0.0603    0.6013    0.1237
Pt    0.0566    0.6465    0.0369
Pt    0.0578    0.6454    0.0796
Pt    0.0585    0.6485    0.1231
Pt    0.0585    0.6903    0.0358
Pt    0.0580    0.6905    0.0809
Pt    0.0577    0.6887    0.1241
Pt    0.0592    0.7335    0.0388
Pt    0.1019    0.5579    0.0404
Pt    0.1042    0.5579    0.0802
Pt    0.1029    0.5579    0.1234
Pt    0.1051    0.6022    0.0374
Pt    0.1023    0.6038    0.0787
Pt    0.1030    0.5998    0.1225
Pt    0.1040    0.6454    0.0358
Pt    0.1013    0.6443    0.0781
Pt    0.1027    0.6468    0.1208
Pt    0.1047    0.6899    0.0349
Pt    0.1034    0.6936    0.0782
Pt    0.1005    0.6906    0.1213
Pt    0.0999    0.7312    0.1177
Pt    0.1474    0.5583    0.0359
Pt    0.1472    0.5568    0.0804
Pt    0.1473    0.5568    0.1247
Pt    0.1475    0.6017    0.0378
Pt    0.1468    0.5998    0.0785
Pt    0.1478    0.6013    0.1211
Pt    0.1492    0.6475    0.0352
Pt    0.1481    0.6454    0.0782
Pt    0.1460    0.6441    0.1202
Pt    0.1434    0.6906    0.0780
Pt    0.1468    0.6892    0.1218
Pt    0.1446    0.7327    0.1215
Pt    0.1907    0.5565    0.0374
Pt    0.1949    0.5547    0.0828
Pt    0.1915    0.5584    0.1230
Pt    0.1937    0.6016    0.0381
Pt    0.1928    0.6022    0.0789
Pt    0.1920    0.5999    0.1212
Pt    0.1909    0.6454    0.0779
Pt    0.1915    0.6426    0.1198
Pt    0.1910    0.6883    0.0794
Pt    0.1896    0.6895    0.1218
Pt    0.1879    0.7311    0.0769
Pt    0.1880    0.7309    0.1219
Pt    0.2332    0.5568    0.0374
Pt    0.2337    0.6011    0.1216
Pt    0.2335    0.6432    0.1221
Pt    0.2328    0.6886    0.0788
Pt    0.2353    0.6887    0.1226
Pt    0.2353    0.7315    0.0361
Pt    0.2344    0.7322    0.0790
Pt    0.2333    0.7344    0.1223
Pt    0.0373    0.5383    0.0380
Pt    0.0341    0.5361    0.0805
Pt    0.0373    0.5341    0.1250
Pt    0.0371    0.5825    0.0359
Pt    0.0365    0.5808    0.0807
Pt    0.0374    0.5812    0.1252
Pt    0.0358    0.6244    0.0368
Pt    0.0367    0.6227    0.0803
Pt    0.0373    0.6236    0.1223
Pt    0.0374    0.6690    0.0362
Pt    0.0364    0.6691    0.0801
Pt    0.0355    0.6684    0.1247
Pt    0.0367    0.7122    0.0374
Pt    0.0327    0.7090    0.0814
Pt    0.0360    0.7529    0.0367
Pt    0.0830    0.5355    0.0370
Pt    0.0807    0.5345    0.0819
Pt    0.0816    0.5351    0.1243
Pt    0.0809    0.5798    0.0365
Pt    0.0804    0.5783    0.0804
Pt    0.0796    0.5780    0.1216
Pt    0.0818    0.6222    0.0356
Pt    0.0804    0.6248    0.0795
Pt    0.0834    0.6236    0.1243
Pt    0.0798    0.6665    0.0357
Pt    0.0799    0.6663    0.0791
Pt    0.0807    0.6695    0.1206
Pt    0.0833    0.7105    0.0352
Pt    0.1254    0.5361    0.0356
Pt    0.1249    0.5370    0.0810
Pt    0.1255    0.5359    0.1238
Pt    0.1249    0.5805    0.0367
Pt    0.1253    0.5797    0.0791
Pt    0.1255    0.5808    0.1222
Pt    0.1271    0.6237    0.0377
Pt    0.1257    0.6265    0.0796
Pt    0.1242    0.6207    0.1238
Pt    0.1250    0.6692    0.0352
Pt    0.1229    0.6672    0.0785
Pt    0.1243    0.6683    0.1208
Pt    0.1223    0.7116    0.1203
Pt    0.1223    0.7540    0.1207
Pt    0.1702    0.5342    0.0369
Pt    0.1711    0.5365    0.0812
Pt    0.1705    0.5353    0.1254
Pt    0.1715    0.5790    0.0382
Pt    0.1705    0.5789    0.0798
Pt    0.1701    0.5792    0.1235
Pt    0.1707    0.6228    0.0386
Pt    0.1695    0.6212    0.0791
Pt    0.1680    0.6223    0.1215
Pt    0.1724    0.6634    0.0350
Pt    0.1695    0.6675    0.0789
Pt    0.1677    0.6661    0.1204
Pt    0.1656    0.7103    0.0767
Pt    0.1672    0.7097    0.1217
Pt    0.1683    0.7532    0.0780
Pt    0.1682    0.7552    0.1215
Pt    0.2114    0.5349    0.0389
Pt    0.2138    0.5333    0.0848
Pt    0.2133    0.5779    0.0375
Pt    0.2127    0.6215    0.1218
Pt    0.2127    0.6667    0.0795
Pt    0.2121    0.6678    0.1202
Pt    0.2139    0.7111    0.0352
Pt    0.2112    0.7107    0.0777
Pt    0.2123    0.7115    0.1217
Pt    0.2123    0.7520    0.0793
Pt    0.2112    0.7525    0.1224
Pt    0.2535    0.5368    0.0389
Pt    0.2554    0.6189    0.1207
Pt    0.2544    0.6649    0.0802
Pt    0.2554    0.6648    0.1202
Pt    0.2567    0.7099    0.0788
Pt    0.2563    0.7085    0.1238
Pt    0.2555    0.7516    0.0346
Pt    0.2572    0.7526    0.0791
Pt    0.2556    0.7543    0.1246
Pt    0.0362    0.6889    0.1044
Pt    0.0353    0.5606    0.0575
Pt    0.0360    0.5575    0.1032
Pt    0.0364    0.6905    0.0573
Pt    0.0370    0.6025    0.0594
Pt    0.0361    0.6010    0.1025
Pt    0.0391    0.6453    0.1013
Pt    0.0351    0.6456    0.0591
Pt    0.0814    0.5152    0.0171
Pt    0.1483    0.6235    0.0163
Pt    0.1020    0.5779    0.0167
Pt    0.0380    0.5147    0.0586
Pt    0.0822    0.5145    0.0605
Pt    0.0157    0.5144    0.0355
Pt    0.1698    0.5148    0.0156
Pt    0.0584    0.5159    0.0809
Pt    0.1704    0.5154    0.1042
Pt    0.0162    0.6466    0.0351
Pt    0.1253    0.5144    0.0149
Pt    0.0152    0.5362    0.1034
Pt    0.0608    0.5155    0.0380
Pt    0.0373    0.5148    0.1029
Pt    0.1462    0.5144    0.0823
Pt    0.0171    0.5596    0.1245
Pt    0.0161    0.6668    0.1029
Pt    0.0151    0.6037    0.1230
Pt    0.2558    0.7294    0.0153
Pt    0.1928    0.5357    0.0154
Pt    0.0151    0.5820    0.0593
Pt    0.0815    0.5580    0.0167
Pt    0.0578    0.5372    0.0156
Pt    0.2348    0.5360    0.0164
Pt    0.0596    0.7144    0.0157
Pt    0.1711    0.6008    0.0181
Pt    0.1703    0.5586    0.0152
Pt    0.1930    0.6228    0.0162
Pt    0.0590    0.6678    0.0150
Pt    0.2142    0.5148    0.0151
Pt    0.0366    0.5589    0.0149
Pt    0.1465    0.5824    0.0156
Pt    0.1491    0.5376    0.0149
Pt    0.2564    0.7288    0.2327
Pt    0.2551    0.7318    0.1898
Pt    0.0157    0.6472    0.1676
Pt    0.2557    0.7294    0.1450
Pt    0.2552    0.6874    0.2336
Pt    0.2535    0.6851    0.1886
Pt    0.2537    0.6871    0.1472
Pt    0.2559    0.6000    0.1919
Pt    0.0153    0.7296    0.2521
Pt    0.0592    0.5361    0.1462
Pt    0.0591    0.5351    0.1908
Pt    0.0576    0.5372    0.2325
Pt    0.0592    0.5821    0.1459
Pt    0.0588    0.5822    0.1927
Pt    0.0601    0.6247    0.1461
Pt    0.0589    0.6253    0.1899
Pt    0.0573    0.6667    0.1447
Pt    0.0583    0.6661    0.1895
Pt    0.0575    0.7047    0.1891
Pt    0.0543    0.7082    0.2324
Pt    0.0600    0.7512    0.1877
Pt    0.0591    0.7524    0.2317
Pt    0.1031    0.5353    0.1467
Pt    0.1041    0.5343    0.1896
Pt    0.1016    0.5792    0.1470
Pt    0.1032    0.5754    0.1908
Pt    0.1033    0.6236    0.1460
Pt    0.1036    0.6230    0.1892
Pt    0.1022    0.6259    0.2309
Pt    0.1027    0.6673    0.1431
Pt    0.1018    0.6669    0.1883
Pt    0.1021    0.6645    0.2310
Pt    0.1026    0.7107    0.1445
Pt    0.0990    0.7089    0.1888
Pt    0.1009    0.7079    0.2326
Pt    0.1001    0.7516    0.1412
Pt    0.1020    0.7536    0.1844
Pt    0.0995    0.7522    0.2325
Pt    0.1486    0.5353    0.1463
Pt    0.1473    0.5786    0.1436
Pt    0.1487    0.5787    0.1879
Pt    0.1470    0.6239    0.1434
Pt    0.1453    0.6204    0.1886
Pt    0.1480    0.6231    0.2322
Pt    0.1453    0.6670    0.1425
Pt    0.1444    0.6666    0.1852
Pt    0.1452    0.6675    0.2302
Pt    0.1423    0.7099    0.1425
Pt    0.1433    0.7106    0.1861
Pt    0.1455    0.7104    0.2309
Pt    0.1460    0.7535    0.1441
Pt    0.1422    0.7523    0.1887
Pt    0.1441    0.7527    0.2307
Pt    0.1909    0.5787    0.1445
Pt    0.1897    0.5778    0.1879
Pt    0.1894    0.5785    0.2311
Pt    0.1891    0.6214    0.1431
Pt    0.1920    0.6217    0.1898
Pt    0.1892    0.6205    0.2334
Pt    0.1465    0.5163    0.1670
Pt    0.1898    0.6677    0.1856
Pt    0.1887    0.6667    0.2314
Pt    0.1912    0.7106    0.1439
Pt    0.1882    0.7106    0.1874
Pt    0.1891    0.7103    0.2319
Pt    0.1909    0.7557    0.1433
Pt    0.1900    0.7527    0.1888
Pt    0.1862    0.7535    0.2332
Pt    0.2317    0.5322    0.2305
Pt    0.2343    0.5779    0.1891
Pt    0.2329    0.5787    0.2329
Pt    0.2342    0.6208    0.1450
Pt    0.2315    0.6232    0.1888
Pt    0.2345    0.6207    0.2341
Pt    0.2333    0.6652    0.1436
Pt    0.2310    0.6649    0.1891
Pt    0.2319    0.6658    0.2330
Pt    0.2343    0.7113    0.1446
Pt    0.2334    0.7090    0.1899
Pt    0.2316    0.7102    0.2301
Pt    0.2312    0.7513    0.1458
Pt    0.2312    0.7537    0.1901
Pt    0.2296    0.7563    0.2303
Pt    0.2542    0.6419    0.2352
Pt    0.2535    0.6436    0.1877
Pt    0.2541    0.6413    0.1430
Pt    0.2509    0.5554    0.2336
Pt    0.2547    0.5991    0.2327
Pt    0.0607    0.5584    0.1671
Pt    0.0612    0.5588    0.2122
Pt    0.0588    0.6025    0.1707
Pt    0.0587    0.6454    0.1664
Pt    0.0572    0.6871    0.1651
Pt    0.0557    0.6852    0.2135
Pt    0.0584    0.6890    0.2528
Pt    0.0590    0.7321    0.2094
Pt    0.0550    0.7289    0.2543
Pt    0.1018    0.5586    0.1668
Pt    0.1028    0.6012    0.1684
Pt    0.0996    0.6464    0.1652
Pt    0.0992    0.6446    0.2086
Pt    0.1029    0.6445    0.2539
Pt    0.1013    0.6890    0.1651
Pt    0.1018    0.6852    0.2103
Pt    0.1008    0.6864    0.2534
Pt    0.1018    0.7312    0.1649
Pt    0.1010    0.7325    0.2090
Pt    0.1010    0.7296    0.2560
Pt    0.1460    0.5563    0.1673
Pt    0.1468    0.6016    0.1660
Pt    0.1459    0.6024    0.2098
Pt    0.1457    0.5992    0.2536
Pt    0.1477    0.6457    0.1636
Pt    0.1465    0.6443    0.2091
Pt    0.1441    0.6453    0.2553
Pt    0.1454    0.6902    0.1635
Pt    0.1431    0.6901    0.2083
Pt    0.1453    0.6903    0.2541
Pt    0.1441    0.7314    0.1653
Pt    0.1428    0.7307    0.2089
Pt    0.1450    0.7312    0.2542
Pt    0.1928    0.5555    0.1640
Pt    0.1899    0.5548    0.2109
Pt    0.1895    0.5568    0.2541
Pt    0.1888    0.5983    0.1674
Pt    0.1890    0.6004    0.2101
Pt    0.1888    0.5999    0.2544
Pt    0.1903    0.6456    0.1637
Pt    0.1893    0.6451    0.2090
Pt    0.1897    0.6422    0.2549
Pt    0.1898    0.6892    0.1636
Pt    0.1890    0.6886    0.2109
Pt    0.1887    0.6890    0.2533
Pt    0.1890    0.7320    0.1654
Pt    0.1868    0.7310    0.2107
Pt    0.1874    0.7326    0.2542
Pt    0.2325    0.5536    0.2092
Pt    0.2309    0.5552    0.2544
Pt    0.2303    0.6001    0.1675
Pt    0.2318    0.5999    0.2101
Pt    0.2337    0.5982    0.2549
Pt    0.2326    0.6437    0.1656
Pt    0.2335    0.6449    0.2122
Pt    0.2321    0.6440    0.2559
Pt    0.2322    0.6874    0.1680
Pt    0.2321    0.6877    0.2112
Pt    0.2329    0.6891    0.2531
Pt    0.2339    0.7326    0.1679
Pt    0.2342    0.7325    0.2118
Pt    0.2317    0.7318    0.2508
Pt    0.0389    0.5351    0.1674
Pt    0.0364    0.5340    0.2109
Pt    0.0368    0.5345    0.2537
Pt    0.0392    0.5803    0.1682
Pt    0.0353    0.5788    0.2101
Pt    0.0376    0.6253    0.1688
Pt    0.0370    0.6664    0.1679
Pt    0.0377    0.7102    0.2080
Pt    0.0339    0.7518    0.2548
Pt    0.0825    0.5354    0.1698
Pt    0.0811    0.5331    0.2123
Pt    0.0800    0.5810    0.1696
Pt    0.0806    0.6223    0.1681
Pt    0.0791    0.6675    0.1637
Pt    0.0776    0.6635    0.2127
Pt    0.0810    0.6656    0.2516
Pt    0.0767    0.7100    0.1672
Pt    0.0797    0.7078    0.2115
Pt    0.0787    0.7105    0.2534
Pt    0.0800    0.7516    0.1645
Pt    0.0794    0.7549    0.2097
Pt    0.0779    0.7486    0.2533
Pt    0.1250    0.5361    0.1651
Pt    0.1246    0.5794    0.1675
Pt    0.1251    0.6229    0.1667
Pt    0.1234    0.6223    0.2099
Pt    0.1235    0.6223    0.2546
Pt    0.1227    0.6659    0.1654
Pt    0.1231    0.6647    0.2098
Pt    0.1234    0.6667    0.2533
Pt    0.1232    0.7097    0.1656
Pt    0.1222    0.7082    0.2110
Pt    0.1220    0.7091    0.2527
Pt    0.1225    0.7556    0.1635
Pt    0.1222    0.7545    0.2097
Pt    0.1215    0.7530    0.2532
Pt    0.1697    0.5338    0.1674
Pt    0.1675    0.5775    0.1651
Pt    0.1694    0.5778    0.2108
Pt    0.1665    0.5779    0.2525
Pt    0.1683    0.6239    0.1657
Pt    0.1688    0.6226    0.2096
Pt    0.1667    0.6217    0.2547
Pt    0.1683    0.6691    0.1638
Pt    0.1679    0.6672    0.2083
Pt    0.1660    0.6662    0.2535
Pt    0.1665    0.7110    0.1651
Pt    0.1664    0.7096    0.2097
Pt    0.1680    0.7100    0.2541
Pt    0.1675    0.7537    0.1660
Pt    0.1652    0.7525    0.2068
Pt    0.1656    0.7530    0.2545
Pt    0.2114    0.5360    0.2083
Pt    0.2140    0.5775    0.1668
Pt    0.2121    0.5783    0.2120
Pt    0.2122    0.5772    0.2542
Pt    0.2091    0.6237    0.1659
Pt    0.2126    0.6229    0.2122
Pt    0.2129    0.6230    0.2547
Pt    0.2104    0.6670    0.1644
Pt    0.2101    0.6668    0.2099
Pt    0.2111    0.6670    0.2534
Pt    0.2130    0.7104    0.1648
Pt    0.2104    0.7097    0.2091
Pt    0.2112    0.7100    0.2549
Pt    0.2110    0.7527    0.1687
Pt    0.2095    0.7514    0.2086
Pt    0.2093    0.7548    0.2533
Pt    0.2534    0.5332    0.2550
Pt    0.2542    0.5790    0.1694
Pt    0.2548    0.5764    0.2117
Pt    0.2545    0.5749    0.2553
Pt    0.2527    0.6186    0.1685
Pt    0.2534    0.6236    0.2113
Pt    0.2556    0.6191    0.2566
Pt    0.2540    0.6639    0.1669
Pt    0.2536    0.6660    0.2112
Pt    0.2538    0.6664    0.2548
Pt    0.2543    0.7089    0.1690
Pt    0.2533    0.7086    0.2092
Pt    0.2535    0.7077    0.2546
Pt    0.2565    0.7517    0.1662
Pt    0.2542    0.7540    0.2110
Pt    0.2544    0.7525    0.2518
Pt    0.0387    0.5596    0.1448
Pt    0.0377    0.5564    0.1904
Pt    0.0368    0.5574    0.2325
Pt    0.0377    0.6027    0.1472
Pt    0.0364    0.6034    0.1907
Pt    0.0366    0.6457    0.1448
Pt    0.0376    0.7312    0.2300
Pt    0.0813    0.5583    0.1456
Pt    0.0818    0.5560    0.1904
Pt    0.0823    0.6012    0.1431
Pt    0.0820    0.6029    0.1905
Pt    0.0815    0.6466    0.1414
Pt    0.0804    0.6465    0.1851
Pt    0.0785    0.6900    0.1439
Pt    0.0794    0.6868    0.1903
Pt    0.0775    0.6886    0.2314
Pt    0.0805    0.7303    0.1864
Pt    0.0786    0.7293    0.2322
Pt    0.1243    0.5588    0.1448
Pt    0.1252    0.5564    0.1874
Pt    0.1246    0.6012    0.1448
Pt    0.1233    0.5988    0.1893
Pt    0.1261    0.6044    0.2330
Pt    0.1249    0.6443    0.1441
Pt    0.1234    0.6450    0.1881
Pt    0.1265    0.6426    0.2321
Pt    0.1219    0.6890    0.1431
Pt    0.1214    0.6886    0.1874
Pt    0.1231    0.6872    0.2317
Pt    0.1225    0.7332    0.1430
Pt    0.1211    0.7300    0.1870
Pt    0.1219    0.7311    0.2314
Pt    0.1700    0.5568    0.1439
Pt    0.1726    0.5555    0.1852
Pt    0.1692    0.6014    0.1443
Pt    0.1680    0.6021    0.1896
Pt    0.1659    0.6001    0.2316
Pt    0.1699    0.6443    0.1435
Pt    0.1702    0.6436    0.1870
Pt    0.1682    0.6440    0.2330
Pt    0.1678    0.6890    0.1433
Pt    0.1680    0.6881    0.1873
Pt    0.1677    0.6887    0.2311
Pt    0.1662    0.7319    0.1421
Pt    0.1651    0.7331    0.1872
Pt    0.1658    0.7313    0.2304
Pt    0.2116    0.5570    0.1876
Pt    0.2100    0.5542    0.2320
Pt    0.2117    0.6014    0.1445
Pt    0.2114    0.6002    0.1889
Pt    0.2112    0.6007    0.2334
Pt    0.2125    0.6456    0.1419
Pt    0.2104    0.6447    0.1873
Pt    0.2088    0.6435    0.2315
Pt    0.2143    0.6891    0.1424
Pt    0.2098    0.6915    0.1877
Pt    0.2103    0.6876    0.2327
Pt    0.2112    0.7323    0.1453
Pt    0.2116    0.7303    0.1892
Pt    0.2091    0.7327    0.2312
Pt    0.2558    0.5564    0.1892
Pt    0.0168    0.6238    0.1902
Pt    0.0155    0.6246    0.1474
Pt    0.2278    0.5148    0.2546
Pt    0.2519    0.5984    0.1459
Pt    0.0160    0.5805    0.1484
Pt    0.0160    0.5567    0.1666
Pt    0.0167    0.6020    0.1693
Pt    0.0168    0.5780    0.1881
Pt    0.0607    0.5147    0.1684
Pt    0.0793    0.5156    0.1468
Pt    0.0157    0.5367    0.1904
Pt    0.0153    0.5579    0.2127
Pt    0.0152    0.5352    0.2314
Pt    0.0154    0.5338    0.1473
Pt    0.1264    0.5146    0.1869
Pt    0.1895    0.6668    0.1403
Pt    0.2532    0.5985    0.2787
Pt    0.2563    0.6410    0.2772
Pt    0.2534    0.7317    0.3637
Pt    0.2541    0.6013    0.3641
Pt    0.2523    0.5998    0.3210
Pt    0.2552    0.7316    0.3182
Pt    0.2542    0.6868    0.2771
Pt    0.2109    0.7321    0.3645
Pt    0.0600    0.5309    0.2737
Pt    0.0578    0.5351    0.3182
Pt    0.0604    0.5337    0.3598
Pt    0.0607    0.5815    0.3164
Pt    0.0579    0.5788    0.3611
Pt    0.0582    0.6242    0.3622
Pt    0.0574    0.6685    0.3584
Pt    0.0576    0.7065    0.2759
Pt    0.0563    0.7525    0.2760
Pt    0.0553    0.7506    0.3202
Pt    0.1024    0.5342    0.3193
Pt    0.1039    0.5382    0.3600
Pt    0.1014    0.5811    0.3178
Pt    0.1027    0.5781    0.3617
Pt    0.1027    0.6224    0.3198
Pt    0.0992    0.6242    0.3597
Pt    0.1006    0.6657    0.2756
Pt    0.0992    0.6652    0.3184
Pt    0.1004    0.6661    0.3616
Pt    0.0986    0.7068    0.2759
Pt    0.0996    0.7097    0.3193
Pt    0.1004    0.7097    0.3650
Pt    0.0991    0.7522    0.2775
Pt    0.0970    0.7534    0.3208
Pt    0.0997    0.7538    0.3641
Pt    0.1489    0.5377    0.3609
Pt    0.1467    0.5797    0.3620
Pt    0.1441    0.6228    0.2761
Pt    0.1446    0.6209    0.3187
Pt    0.1452    0.6246    0.3612
Pt    0.1446    0.6690    0.2768
Pt    0.1442    0.6672    0.3193
Pt    0.1472    0.6644    0.3614
Pt    0.1418    0.7097    0.2747
Pt    0.1438    0.7110    0.3189
Pt    0.1449    0.7126    0.3622
Pt    0.1438    0.7550    0.2756
Pt    0.1435    0.7543    0.3185
Pt    0.1431    0.7538    0.3603
Pt    0.1879    0.5774    0.2752
Pt    0.1882    0.5775    0.3199
Pt    0.1904    0.5777    0.3643
Pt    0.1896    0.6223    0.2759
Pt    0.1875    0.6234    0.3195
Pt    0.1894    0.6219    0.3629
Pt    0.1886    0.6669    0.2743
Pt    0.1882    0.6671    0.3182
Pt    0.1886    0.6661    0.3631
Pt    0.1887    0.7116    0.2750
Pt    0.1904    0.7099    0.3172
Pt    0.1874    0.7119    0.3634
Pt    0.1873    0.7542    0.2749
Pt    0.1867    0.7556    0.3195
Pt    0.1885    0.7546    0.3619
Pt    0.2308    0.5338    0.2757
Pt    0.2337    0.5768    0.2770
Pt    0.2332    0.5757    0.3219
Pt    0.2296    0.6207    0.2785
Pt    0.2314    0.6223    0.3203
Pt    0.2333    0.6240    0.3631
Pt    0.2328    0.6650    0.2757
Pt    0.2316    0.6662    0.3188
Pt    0.2328    0.6687    0.3631
Pt    0.2326    0.7100    0.2747
Pt    0.2328    0.7108    0.3183
Pt    0.2308    0.7110    0.3619
Pt    0.2315    0.7524    0.2741
Pt    0.2303    0.7516    0.3177
Pt    0.2316    0.7548    0.3627
Pt    0.2571    0.5547    0.3266
Pt    0.2544    0.7326    0.2737
Pt    0.2529    0.7543    0.3861
Pt    0.2534    0.6450    0.3649
Pt    0.2532    0.6906    0.3619
Pt    0.2540    0.6448    0.3212
Pt    0.2527    0.6879    0.3171
Pt    0.0601    0.5567    0.2962
Pt    0.0588    0.5582    0.3398
Pt    0.0576    0.5560    0.3812
Pt    0.0604    0.6033    0.3402
Pt    0.0580    0.6015    0.3827
Pt    0.0568    0.6504    0.3823
Pt    0.0543    0.7313    0.2985
Pt    0.1050    0.5576    0.3368
Pt    0.1027    0.5565    0.3828
Pt    0.1005    0.6051    0.2964
Pt    0.1027    0.5997    0.3404
Pt    0.0997    0.6028    0.3837
Pt    0.1025    0.6433    0.2967
Pt    0.1006    0.6443    0.3390
Pt    0.1022    0.6435    0.3839
Pt    0.0974    0.6862    0.2981
Pt    0.0991    0.6875    0.3393
Pt    0.1018    0.6888    0.3855
Pt    0.1002    0.7287    0.2989
Pt    0.0997    0.7290    0.3439
Pt    0.2332    0.6025    0.3859
Pt    0.1473    0.5582    0.3833
Pt    0.1441    0.5992    0.2945
Pt    0.1467    0.6016    0.3400
Pt    0.1460    0.6012    0.3840
Pt    0.1436    0.6435    0.2963
Pt    0.1472    0.6450    0.3394
Pt    0.1464    0.6459    0.3834
Pt    0.1452    0.6889    0.2988
Pt    0.1432    0.6881    0.3426
Pt    0.1418    0.6874    0.3818
Pt    0.1444    0.7314    0.2967
Pt    0.1420    0.7332    0.3403
Pt    0.1444    0.7342    0.3835
Pt    0.1878    0.5992    0.2973
Pt    0.1882    0.6003    0.3418
Pt    0.1933    0.6006    0.3847
Pt    0.1893    0.6457    0.2949
Pt    0.1884    0.6450    0.3397
Pt    0.1890    0.6458    0.3838
Pt    0.1883    0.6870    0.2974
Pt    0.1897    0.6888    0.3409
Pt    0.1888    0.6898    0.3866
Pt    0.1882    0.7320    0.2977
Pt    0.1870    0.7312    0.3390
Pt    0.1871    0.7321    0.3851
Pt    0.2352    0.5542    0.3002
Pt    0.2318    0.5987    0.2991
Pt    0.2307    0.6013    0.3404
Pt    0.0180    0.5580    0.2964
Pt    0.2342    0.6455    0.2994
Pt    0.2326    0.6458    0.3404
Pt    0.2316    0.6460    0.3832
Pt    0.2317    0.6875    0.2952
Pt    0.2305    0.6896    0.3398
Pt    0.2316    0.6888    0.3859
Pt    0.2335    0.7323    0.2956
Pt    0.2331    0.7334    0.3402
Pt    0.2322    0.7329    0.3863
Pt    0.0400    0.5353    0.2958
Pt    0.0375    0.5337    0.3396
Pt    0.0357    0.5360    0.3818
Pt    0.0379    0.5790    0.2950
Pt    0.0382    0.5806    0.3381
Pt    0.0349    0.5802    0.3844
Pt    0.0377    0.6245    0.3432
Pt    0.0376    0.6271    0.3830
Pt    0.0361    0.6730    0.3835
Pt    0.0329    0.7533    0.2998
Pt    0.0788    0.5345    0.2980
Pt    0.0815    0.5380    0.3399
Pt    0.0811    0.5351    0.3817
Pt    0.0823    0.5825    0.2956
Pt    0.0810    0.5801    0.3382
Pt    0.0815    0.5792    0.3846
Pt    0.0751    0.6281    0.3315
Pt    0.0770    0.6228    0.3822
Pt    0.0801    0.6656    0.3383
Pt    0.0801    0.6668    0.3837
Pt    0.0768    0.7086    0.2976
Pt    0.0760    0.7078    0.3423
Pt    0.0778    0.7492    0.2980
Pt    0.0777    0.7500    0.3435
Pt    0.1245    0.5356    0.3410
Pt    0.1266    0.5362    0.3840
Pt    0.1245    0.5803    0.3409
Pt    0.1243    0.5789    0.3834
Pt    0.1236    0.6219    0.2962
Pt    0.1228    0.6222    0.3408
Pt    0.1232    0.6230    0.3837
Pt    0.1228    0.6674    0.2973
Pt    0.1225    0.6665    0.3407
Pt    0.1220    0.6658    0.3853
Pt    0.1226    0.7071    0.2982
Pt    0.1212    0.7113    0.3421
Pt    0.1239    0.7101    0.3857
Pt    0.1217    0.7516    0.2982
Pt    0.1197    0.7519    0.3413
Pt    0.1225    0.7566    0.3845
Pt    0.1689    0.5337    0.3835
Pt    0.1643    0.5787    0.3399
Pt    0.1704    0.5787    0.3843
Pt    0.1672    0.6221    0.2969
Pt    0.1682    0.6214    0.3401
Pt    0.1674    0.6224    0.3856
Pt    0.1669    0.6661    0.2984
Pt    0.1694    0.6676    0.3402
Pt    0.1664    0.6697    0.3844
Pt    0.1655    0.7099    0.2971
Pt    0.1657    0.7087    0.3391
Pt    0.1653    0.7115    0.3841
Pt    0.1649    0.7549    0.2960
Pt    0.1657    0.7557    0.3384
Pt    0.1681    0.7537    0.3827
Pt    0.2124    0.5752    0.2992
Pt    0.2100    0.5788    0.3420
Pt    0.2074    0.6203    0.2975
Pt    0.2102    0.6222    0.3411
Pt    0.2118    0.6242    0.3857
Pt    0.2114    0.6643    0.2976
Pt    0.2109    0.6658    0.3414
Pt    0.2095    0.6690    0.3852
Pt    0.2112    0.7110    0.2956
Pt    0.2109    0.7109    0.3405
Pt    0.2095    0.7106    0.3849
Pt    0.2099    0.7534    0.2956
Pt    0.2106    0.7543    0.3405
Pt    0.2101    0.7554    0.3847
Pt    0.2538    0.5320    0.3010
Pt    0.2546    0.5763    0.3007
Pt    0.2534    0.5798    0.3445
Pt    0.2545    0.6213    0.3003
Pt    0.2544    0.6226    0.3423
Pt    0.2548    0.6217    0.3857
Pt    0.2549    0.6660    0.2956
Pt    0.2528    0.6683    0.3421
Pt    0.2528    0.6665    0.3869
Pt    0.2557    0.7096    0.2970
Pt    0.2537    0.7091    0.3387
Pt    0.2308    0.5145    0.2977
Pt    0.2567    0.7528    0.2949
Pt    0.2530    0.7530    0.3436
Pt    0.2540    0.5528    0.2770
Pt    0.0384    0.5590    0.2737
Pt    0.0380    0.5567    0.3191
Pt    0.0366    0.5551    0.3597
Pt    0.0392    0.6031    0.3197
Pt    0.0372    0.6004    0.3628
Pt    0.0352    0.6492    0.3606
Pt    0.0357    0.7280    0.2774
Pt    0.0809    0.5592    0.3172
Pt    0.0807    0.5578    0.3606
Pt    0.0793    0.6041    0.3172
Pt    0.0809    0.5998    0.3618
Pt    0.0793    0.6456    0.3601
Pt    0.0768    0.6855    0.2755
Pt    0.0762    0.6863    0.3190
Pt    0.0810    0.6876    0.3621
Pt    0.0765    0.7296    0.2763
Pt    0.0773    0.7284    0.3191
Pt    0.1265    0.5570    0.3611
Pt    0.1258    0.5995    0.3179
Pt    0.1253    0.6017    0.3628
Pt    0.1230    0.6458    0.2758
Pt    0.1236    0.6447    0.3192
Pt    0.1228    0.6454    0.3615
Pt    0.1216    0.6874    0.2758
Pt    0.1225    0.6879    0.3219
Pt    0.1204    0.6893    0.3608
Pt    0.1222    0.7310    0.2768
Pt    0.1211    0.7314    0.3198
Pt    0.1200    0.7318    0.3644
Pt    0.1697    0.5596    0.3616
Pt    0.1664    0.6004    0.2741
Pt    0.1665    0.5977    0.3171
Pt    0.1661    0.6007    0.3630
Pt    0.1650    0.6453    0.2769
Pt    0.1680    0.6452    0.3183
Pt    0.1688    0.6435    0.3618
Pt    0.1672    0.6888    0.2768
Pt    0.1664    0.6889    0.3182
Pt    0.1672    0.6895    0.3631
Pt    0.1669    0.7309    0.2763
Pt    0.1643    0.7332    0.3176
Pt    0.1654    0.7338    0.3579
Pt    0.2111    0.5574    0.2754
Pt    0.2093    0.5976    0.2776
Pt    0.2094    0.6004    0.3189
Pt    0.2130    0.6020    0.3636
Pt    0.2097    0.6440    0.2754
Pt    0.2113    0.6437    0.3181
Pt    0.2105    0.6462    0.3624
Pt    0.2095    0.6889    0.2765
Pt    0.2097    0.6876    0.3180
Pt    0.2074    0.6887    0.3629
Pt    0.2125    0.7331    0.2744
Pt    0.2100    0.7319    0.3177
Pt    0.0155    0.5582    0.3383
Pt    0.0158    0.5344    0.3182
Pt    0.2535    0.7105    0.3834
Pt    0.1046    0.5146    0.3814
Pt    0.0998    0.7352    0.3862
Pt    0.0171    0.5815    0.3159
Pt    0.0162    0.6048    0.3405
Pt    0.1263    0.5153    0.3617
Pt    0.0839    0.5158    0.3605
Pt    0.0167    0.7292    0.3002
Pt    0.0160    0.5804    0.3602
Pt    0.0160    0.5148    0.2955
Pt    0.1045    0.5147    0.3402
Pt    0.2539    0.7324    0.4937
Pt    0.2538    0.7316    0.4525
Pt    0.2540    0.7305    0.4082
Pt    0.2540    0.6872    0.4539
Pt    0.1682    0.6444    0.4514
Pt    0.2536    0.6874    0.4078
Pt    0.2535    0.6454    0.4079
Pt    0.2578    0.5593    0.4942
Pt    0.2088    0.7314    0.4523
Pt    0.2108    0.7324    0.4073
Pt    0.1661    0.6462    0.4044
Pt    0.2067    0.6916    0.4548
Pt    0.1679    0.6001    0.4932
Pt    0.1699    0.6027    0.4490
Pt    0.2379    0.5161    0.4683
Pt    0.0587    0.5368    0.4042
Pt    0.0564    0.5358    0.4464
Pt    0.0587    0.5386    0.4952
Pt    0.0569    0.5785    0.4036
Pt    0.0585    0.5801    0.4470
Pt    0.0601    0.5840    0.4930
Pt    0.0578    0.6256    0.4069
Pt    0.0584    0.6264    0.4479
Pt    0.0593    0.6262    0.4924
Pt    0.0581    0.6693    0.4074
Pt    0.0576    0.6712    0.4492
Pt    0.0570    0.6692    0.4924
Pt    0.0595    0.7127    0.4487
Pt    0.0590    0.7121    0.4943
Pt    0.0599    0.7552    0.4907
Pt    0.1035    0.5359    0.4058
Pt    0.1020    0.5380    0.4471
Pt    0.1012    0.5369    0.4915
Pt    0.1011    0.5803    0.4060
Pt    0.1023    0.5805    0.4484
Pt    0.1020    0.5820    0.4931
Pt    0.1018    0.6236    0.4076
Pt    0.1020    0.6232    0.4493
Pt    0.1032    0.6255    0.4943
Pt    0.1001    0.6666    0.4068
Pt    0.1032    0.6701    0.4491
Pt    0.1025    0.6673    0.4922
Pt    0.1002    0.7136    0.4067
Pt    0.1048    0.7123    0.4509
Pt    0.1019    0.7134    0.4928
Pt    0.1480    0.5321    0.4049
Pt    0.1456    0.5376    0.4491
Pt    0.1462    0.5392    0.4926
Pt    0.1452    0.5814    0.4053
Pt    0.1465    0.5806    0.4483
Pt    0.1459    0.5778    0.4917
Pt    0.1457    0.6223    0.4057
Pt    0.1476    0.6212    0.4500
Pt    0.1461    0.6254    0.4952
Pt    0.1451    0.6686    0.4051
Pt    0.1464    0.6667    0.4506
Pt    0.1455    0.6707    0.4955
Pt    0.1438    0.7131    0.4048
Pt    0.1442    0.7541    0.4078
Pt    0.1904    0.5340    0.4042
Pt    0.1908    0.5375    0.4492
Pt    0.1930    0.5345    0.4939
Pt    0.1906    0.5790    0.4052
Pt    0.1904    0.5784    0.4497
Pt    0.1924    0.5796    0.4940
Pt    0.1884    0.6233    0.4068
Pt    0.1898    0.6243    0.4528
Pt    0.1909    0.6228    0.4945
Pt    0.1892    0.6682    0.4075
Pt    0.1869    0.6676    0.4530
Pt    0.1872    0.7123    0.4086
Pt    0.1839    0.7104    0.4510
Pt    0.1882    0.7549    0.4065
Pt    0.1892    0.7533    0.4519
Pt    0.2355    0.5380    0.4497
Pt    0.2355    0.5357    0.4930
Pt    0.2319    0.5839    0.4525
Pt    0.2329    0.5804    0.4942
Pt    0.2338    0.6226    0.4085
Pt    0.2303    0.6681    0.4072
Pt    0.2330    0.7106    0.4088
Pt    0.2318    0.7094    0.4537
Pt    0.2320    0.7533    0.4081
Pt    0.2332    0.7561    0.4521
Pt    0.2304    0.7539    0.4931
Pt    0.1670    0.6011    0.4066
Pt    0.1688    0.5589    0.4934
Pt    0.2103    0.6908    0.4065
Pt    0.1687    0.5572    0.4491
Pt    0.1702    0.5567    0.4032
Pt    0.2114    0.6433    0.4066
Pt    0.2109    0.6006    0.4973
Pt    0.1218    0.7352    0.4066
Pt    0.2122    0.6028    0.4508
Pt    0.0806    0.5579    0.4483
Pt    0.2121    0.6017    0.4068
Pt    0.2136    0.5568    0.4924
Pt    0.1230    0.6904    0.4902
Pt    0.2145    0.5569    0.4504
Pt    0.0554    0.5578    0.4259
Pt    0.0596    0.5579    0.4703
Pt    0.0362    0.6466    0.4481
Pt    0.0570    0.6018    0.4259
Pt    0.0579    0.6023    0.4701
Pt    0.1237    0.5606    0.4476
Pt    0.0557    0.6488    0.4280
Pt    0.0588    0.6476    0.4714
Pt    0.1240    0.5582    0.4038
Pt    0.0601    0.6913    0.4264
Pt    0.0575    0.6922    0.4711
Pt    0.0792    0.5561    0.4039
Pt    0.0594    0.7347    0.4701
Pt    0.0809    0.7340    0.4935
Pt    0.1016    0.5585    0.4262
Pt    0.1022    0.5609    0.4705
Pt    0.0821    0.7325    0.4508
Pt    0.1016    0.6022    0.4258
Pt    0.1023    0.6023    0.4719
Pt    0.0825    0.6911    0.4917
Pt    0.1024    0.6461    0.4297
Pt    0.1024    0.6476    0.4692
Pt    0.1243    0.6913    0.4508
Pt    0.1009    0.6911    0.4276
Pt    0.1030    0.6909    0.4697
Pt    0.0356    0.7341    0.4922
Pt    0.1030    0.7323    0.4292
Pt    0.1473    0.5570    0.4258
Pt    0.1430    0.5595    0.4700
Pt    0.0793    0.6916    0.4501
Pt    0.1467    0.6017    0.4279
Pt    0.1477    0.6032    0.4721
Pt    0.0355    0.7329    0.4468
Pt    0.1487    0.6467    0.4274
Pt    0.1450    0.6457    0.4733
Pt    0.0369    0.6928    0.4925
Pt    0.1458    0.6869    0.4296
Pt    0.1424    0.7333    0.4283
Pt    0.1917    0.5575    0.4268
Pt    0.1918    0.5564    0.4712
Pt    0.1229    0.6889    0.4065
Pt    0.1908    0.6020    0.4286
Pt    0.1895    0.5997    0.4709
Pt    0.0350    0.6921    0.4494
Pt    0.1904    0.6429    0.4305
Pt    0.1884    0.6899    0.4315
Pt    0.1879    0.7314    0.4301
Pt    0.2368    0.5591    0.4725
Pt    0.0796    0.6923    0.4045
Pt    0.2330    0.6014    0.4288
Pt    0.2316    0.6462    0.4266
Pt    0.2324    0.6875    0.4311
Pt    0.2333    0.7335    0.4323
Pt    0.2300    0.7317    0.4735
Pt    0.1241    0.6464    0.4932
Pt    0.0335    0.5365    0.4263
Pt    0.0364    0.5371    0.4705
Pt    0.0352    0.6913    0.4072
Pt    0.0354    0.5802    0.4257
Pt    0.0349    0.5827    0.4702
Pt    0.1256    0.6453    0.4508
Pt    0.0365    0.6236    0.4267
Pt    0.0375    0.6249    0.4713
Pt    0.1246    0.6448    0.4071
Pt    0.0356    0.6705    0.4267
Pt    0.0361    0.6680    0.4717
Pt    0.1245    0.6040    0.4917
Pt    0.0386    0.7121    0.4274
Pt    0.0382    0.7143    0.4707
Pt    0.0800    0.6469    0.4916
Pt    0.0360    0.7540    0.4683
Pt    0.0151    0.5385    0.4486
Pt    0.0801    0.5358    0.4261
Pt    0.0811    0.5374    0.4703
Pt    0.1231    0.6032    0.4500
Pt    0.0776    0.5799    0.4238
Pt    0.0805    0.5800    0.4703
Pt    0.0807    0.6489    0.4494
Pt    0.0809    0.6225    0.4299
Pt    0.0811    0.6258    0.4683
Pt    0.1230    0.6042    0.4073
Pt    0.0806    0.6693    0.4266
Pt    0.0798    0.6691    0.4727
Pt    0.0797    0.6457    0.4075
Pt    0.0797    0.7119    0.4288
Pt    0.0800    0.7136    0.4720
Pt    0.0832    0.6055    0.4921
Pt    0.1251    0.5387    0.4278
Pt    0.1216    0.5376    0.4688
Pt    0.1235    0.5585    0.4929
Pt    0.1253    0.5800    0.4263
Pt    0.1248    0.5832    0.4710
Pt    0.0151    0.5147    0.5129
Pt    0.1235    0.6239    0.4293
Pt    0.1246    0.6246    0.4730
Pt    0.1656    0.7326    0.4076
Pt    0.1238    0.6672    0.4280
Pt    0.1256    0.6676    0.4716
Pt    0.1641    0.6896    0.4524
Pt    0.1242    0.7106    0.4274
Pt    0.1697    0.5360    0.4273
Pt    0.1693    0.5371    0.4729
Pt    0.1680    0.6905    0.4097
Pt    0.1688    0.5791    0.4275
Pt    0.1688    0.5795    0.4711
Pt    0.0799    0.6005    0.4476
Pt    0.1688    0.6232    0.4281
Pt    0.1689    0.6244    0.4738
Pt    0.1711    0.6438    0.4942
Pt    0.1680    0.6679    0.4298
Pt    0.1664    0.6679    0.4741
Pt    0.0356    0.6472    0.4931
Pt    0.1636    0.7111    0.4305
Pt    0.1675    0.7534    0.4304
Pt    0.2120    0.5367    0.4270
Pt    0.2141    0.5348    0.4709
Pt    0.0800    0.6029    0.4044
Pt    0.2121    0.5805    0.4271
Pt    0.2118    0.5786    0.4722
Pt    0.0821    0.5584    0.4925
Pt    0.2101    0.6224    0.4298
Pt    0.2101    0.6692    0.4319
Pt    0.2107    0.7105    0.4307
Pt    0.2093    0.7526    0.4296
Pt    0.2109    0.7537    0.4728
Pt    0.2568    0.5374    0.4713
Pt    0.1679    0.5152    0.4490
Pt    0.2543    0.6662    0.4298
Pt    0.2544    0.7087    0.4300
Pt    0.2554    0.7094    0.4739
Pt    0.2553    0.7544    0.4306
Pt    0.2533    0.7550    0.4731
Pt    0.1678    0.5799    0.5145
Pt    0.0347    0.5575    0.4022
Pt    0.0370    0.5609    0.4494
Pt    0.0381    0.5620    0.4909
Pt    0.0352    0.6024    0.4035
Pt    0.0364    0.6037    0.4489
Pt    0.0371    0.6046    0.4931
Pt    0.0363    0.6490    0.4064
Pt    0.0154    0.7554    0.4928
Pt    0.0803    0.5156    0.4500
Pt    0.0348    0.5154    0.4483
Pt    0.2292    0.7299    0.5140
Pt    0.2131    0.5154    0.4484
Pt    0.0382    0.5160    0.4933
Pt    0.1030    0.5594    0.5139
Pt    0.2141    0.5155    0.4929
Pt    0.0587    0.5158    0.4708
Pt    0.1027    0.5155    0.4271
Pt    0.1700    0.5158    0.4915
Pt    0.0350    0.5164    0.4032
Pt    0.0594    0.6061    0.5131
Pt    0.0813    0.5165    0.4042
Pt    0.1241    0.5163    0.4476
Pt    0.0805    0.6692    0.5132
Pt    0.2530    0.7537    0.5138
Pt    0.1671    0.6673    0.5147
Pt    0.0151    0.7140    0.4906
Pt    0.1905    0.5154    0.4698
Pt    0.0776    0.5162    0.4959
Pt    0.1252    0.5159    0.4936
Pt    0.1033    0.6046    0.5147
Pt    0.2353    0.5586    0.5143
Pt    0.0387    0.7547    0.5126
Pt    0.0168    0.6932    0.4718
Pt    0.1904    0.5582    0.5136
Pt    0.0155    0.6736    0.4938
Pt    0.0151    0.6269    0.4510
Pt    0.1487    0.5156    0.4689
Pt    0.1032    0.6915    0.5142
Pt    0.0338    0.5387    0.5129
Pt    0.0155    0.6045    0.5137
Pt    0.0160    0.6715    0.4517
Pt    0.1456    0.5996    0.5112
Pt    0.2571    0.5355    0.5134
Pt    0.1025    0.5169    0.5127
Pt    0.0600    0.7355    0.5140
Pt    0.0811    0.5807    0.5128
Pt    0.1256    0.6683    0.5139
Pt    0.0808    0.7101    0.5135
Pt    0.2154    0.5362    0.5136
Pt    0.2357    0.5147    0.5147
Pt    0.0588    0.5605    0.5144
Pt    0.1438    0.5584    0.5147
Pt    0.2551    0.7296    0.6189
Pt    0.1472    0.6456    0.5156
Pt    0.1884    0.5163    0.5163
Pt    0.0162    0.6026    0.6018
Pt    0.2548    0.7315    0.5787
Pt    0.0818    0.5146    0.6251
Pt    0.1884    0.6028    0.5176
Pt    0.1233    0.5163    0.5367
Pt    0.1493    0.5158    0.5152
Pt    0.0153    0.6224    0.6250
Pt    0.2514    0.7307    0.5344
Pt    0.0797    0.5159    0.5386
Pt    0.2542    0.6873    0.6200
Pt    0.2548    0.6852    0.5788
Pt    0.2540    0.6418    0.6229
Pt    0.0578    0.5370    0.5385
Pt    0.0586    0.5363    0.5791
Pt    0.0589    0.5365    0.6252
Pt    0.0589    0.5814    0.5377
Pt    0.0562    0.5796    0.5818
Pt    0.0549    0.5764    0.6242
Pt    0.0584    0.6255    0.5360
Pt    0.0573    0.6246    0.5797
Pt    0.0582    0.6223    0.6248
Pt    0.0591    0.6702    0.5378
Pt    0.0575    0.6717    0.5802
Pt    0.0574    0.6677    0.6251
Pt    0.0589    0.7140    0.5382
Pt    0.0589    0.7114    0.5795
Pt    0.1012    0.5388    0.5387
Pt    0.1022    0.5374    0.5800
Pt    0.1013    0.5378    0.6255
Pt    0.1009    0.5806    0.5371
Pt    0.1005    0.5808    0.5806
Pt    0.1013    0.5780    0.6277
Pt    0.1015    0.6268    0.5365
Pt    0.0995    0.6244    0.5801
Pt    0.1018    0.6228    0.6247
Pt    0.1030    0.6711    0.5361
Pt    0.1015    0.6700    0.5805
Pt    0.0989    0.6694    0.6243
Pt    0.0988    0.7125    0.6245
Pt    0.1459    0.5379    0.5375
Pt    0.1469    0.5359    0.5812
Pt    0.1482    0.5346    0.6249
Pt    0.1439    0.5793    0.5369
Pt    0.1489    0.5777    0.5808
Pt    0.1453    0.5783    0.6263
Pt    0.1460    0.6242    0.5366
Pt    0.1449    0.6246    0.5814
Pt    0.1441    0.6210    0.6226
Pt    0.1465    0.6695    0.5359
Pt    0.1451    0.6650    0.5795
Pt    0.1434    0.6681    0.6255
Pt    0.1486    0.7100    0.5756
Pt    0.1434    0.7112    0.6225
Pt    0.1425    0.7545    0.6225
Pt    0.1932    0.5385    0.5384
Pt    0.1909    0.5350    0.5796
Pt    0.1909    0.5801    0.5367
Pt    0.1908    0.5787    0.5815
Pt    0.1901    0.5765    0.6239
Pt    0.1890    0.6212    0.5812
Pt    0.1889    0.6198    0.6228
Pt    0.1904    0.6661    0.5776
Pt    0.1894    0.6642    0.6222
Pt    0.1829    0.7131    0.5763
Pt    0.1865    0.7099    0.6234
Pt    0.1887    0.7530    0.5785
Pt    0.1843    0.7539    0.6216
Pt    0.2381    0.5354    0.5374
Pt    0.2321    0.6218    0.6213
Pt    0.2321    0.6641    0.5789
Pt    0.2304    0.6657    0.6223
Pt    0.2300    0.7102    0.5363
Pt    0.2295    0.7098    0.5788
Pt    0.2316    0.7110    0.6213
Pt    0.2303    0.7521    0.5339
Pt    0.2309    0.7538    0.5781
Pt    0.2311    0.7519    0.6199
Pt    0.2079    0.7309    0.6208
Pt    0.2075    0.7319    0.5790
Pt    0.2096    0.7318    0.5387
Pt    0.2093    0.6870    0.6215
Pt    0.2101    0.6883    0.5794
Pt    0.1041    0.5166    0.5597
Pt    0.0819    0.5168    0.5826
Pt    0.2109    0.6451    0.6222
Pt    0.2113    0.6435    0.5800
Pt    0.0577    0.5582    0.5594
Pt    0.0575    0.5571    0.6018
Pt    0.0592    0.6026    0.5596
Pt    0.0588    0.6026    0.6018
Pt    0.0592    0.6472    0.5593
Pt    0.0560    0.6457    0.6005
Pt    0.0572    0.6918    0.5581
Pt    0.0578    0.6930    0.6041
Pt    0.1026    0.5589    0.5599
Pt    0.1034    0.5588    0.6008
Pt    0.1021    0.6042    0.5585
Pt    0.1021    0.6013    0.6030
Pt    0.1047    0.6488    0.5589
Pt    0.0996    0.6468    0.6040
Pt    0.1018    0.6927    0.5566
Pt    0.0993    0.6910    0.6030
Pt    0.1460    0.5578    0.5601
Pt    0.1468    0.5574    0.6051
Pt    0.1446    0.6032    0.5592
Pt    0.1475    0.6012    0.6023
Pt    0.1460    0.6449    0.5579
Pt    0.1435    0.6456    0.6029
Pt    0.1440    0.6905    0.6007
Pt    0.1439    0.7326    0.6004
Pt    0.1898    0.5584    0.5593
Pt    0.1922    0.5543    0.6013
Pt    0.1899    0.6001    0.5586
Pt    0.1886    0.5986    0.6029
Pt    0.1882    0.6440    0.6004
Pt    0.1869    0.6894    0.5594
Pt    0.1881    0.6900    0.5996
Pt    0.1853    0.7346    0.5564
Pt    0.1849    0.7329    0.6019
Pt    0.2332    0.6440    0.6015
Pt    0.2300    0.6899    0.5570
Pt    0.2324    0.6866    0.5994
Pt    0.2306    0.7320    0.5576
Pt    0.2331    0.7320    0.5980
Pt    0.0351    0.5373    0.5573
Pt    0.0347    0.5369    0.6042
Pt    0.0364    0.5806    0.5593
Pt    0.0342    0.5793    0.6018
Pt    0.0371    0.6237    0.5590
Pt    0.0369    0.6224    0.6017
Pt    0.0368    0.6692    0.5580
Pt    0.0385    0.6710    0.6019
Pt    0.0359    0.7144    0.5589
Pt    0.0810    0.5387    0.5591
Pt    0.0809    0.5378    0.6030
Pt    0.0802    0.5822    0.5584
Pt    0.0809    0.5789    0.6033
Pt    0.0790    0.6251    0.5577
Pt    0.0809    0.6237    0.6040
Pt    0.0811    0.6716    0.5605
Pt    0.0751    0.6685    0.6037
Pt    0.0800    0.7135    0.5576
Pt    0.1241    0.5374    0.5599
Pt    0.1258    0.5365    0.6028
Pt    0.1246    0.5812    0.5606
Pt    0.1258    0.5816    0.6031
Pt    0.1235    0.6243    0.5585
Pt    0.1220    0.6244    0.6033
Pt    0.1268    0.6726    0.5591
Pt    0.1221    0.6698    0.6037
Pt    0.1209    0.7118    0.6019
Pt    0.1697    0.5376    0.5570
Pt    0.1691    0.5347    0.6033
Pt    0.1677    0.5794    0.5581
Pt    0.1683    0.5769    0.6028
Pt    0.1686    0.6230    0.5568
Pt    0.1679    0.6221    0.6010
Pt    0.1667    0.6679    0.5567
Pt    0.1667    0.6667    0.6008
Pt    0.1662    0.7096    0.5995
Pt    0.1651    0.7556    0.5993
Pt    0.2168    0.5379    0.5610
Pt    0.2109    0.5780    0.5573
Pt    0.2107    0.6212    0.5999
Pt    0.2090    0.6669    0.5990
Pt    0.2068    0.7099    0.5579
Pt    0.2091    0.7106    0.6007
Pt    0.2094    0.7543    0.5573
Pt    0.2106    0.7518    0.5986
Pt    0.2572    0.6652    0.6020
Pt    0.2518    0.7108    0.5585
Pt    0.2540    0.7077    0.5965
Pt    0.2524    0.7533    0.5565
Pt    0.2533    0.7535    0.6009
Pt    0.0363    0.5585    0.5364
Pt    0.0353    0.5586    0.5806
Pt    0.0350    0.5565    0.6252
Pt    0.0361    0.6029    0.5356
Pt    0.0369    0.6018    0.5800
Pt    0.0359    0.6003    0.6239
Pt    0.0375    0.6462    0.5382
Pt    0.0365    0.6476    0.5812
Pt    0.0369    0.6444    0.6241
Pt    0.0374    0.6912    0.5377
Pt    0.0368    0.6940    0.5806
Pt    0.0364    0.7339    0.5351
Pt    0.0799    0.5598    0.5367
Pt    0.0799    0.5595    0.5814
Pt    0.0790    0.5570    0.6250
Pt    0.0809    0.6033    0.5363
Pt    0.0798    0.6026    0.5814
Pt    0.0822    0.5990    0.6241
Pt    0.0810    0.6497    0.5393
Pt    0.0806    0.6463    0.5806
Pt    0.0784    0.6454    0.6243
Pt    0.0802    0.6892    0.5356
Pt    0.0814    0.6924    0.5806
Pt    0.0779    0.6917    0.6258
Pt    0.1231    0.5594    0.5381
Pt    0.1238    0.5591    0.5809
Pt    0.1246    0.5564    0.6254
Pt    0.1240    0.6026    0.5366
Pt    0.1230    0.6049    0.5824
Pt    0.1233    0.5996    0.6256
Pt    0.1254    0.6494    0.5379
Pt    0.1218    0.6473    0.5833
Pt    0.1230    0.6441    0.6253
Pt    0.1209    0.6919    0.5797
Pt    0.1216    0.6907    0.6227
Pt    0.1189    0.7356    0.6224
Pt    0.1666    0.5593    0.5353
Pt    0.1701    0.5557    0.5800
Pt    0.1740    0.5539    0.6270
Pt    0.1658    0.6009    0.5365
Pt    0.1668    0.6024    0.5780
Pt    0.1692    0.5985    0.6251
Pt    0.1693    0.6461    0.5361
Pt    0.1676    0.6446    0.5776
Pt    0.1662    0.6438    0.6232
Pt    0.1647    0.6873    0.5782
Pt    0.1640    0.6888    0.6229
Pt    0.1634    0.7353    0.5800
Pt    0.1638    0.7317    0.6228
Pt    0.2155    0.5565    0.5379
Pt    0.2114    0.5583    0.5800
Pt    0.2104    0.5973    0.6227
Pt    0.1480    0.5161    0.5559
Pt    0.1226    0.5372    0.5155
Pt    0.1018    0.6480    0.5151
Pt    0.0595    0.6896    0.5157
Pt    0.1687    0.6219    0.5167
Pt    0.0583    0.5143    0.6032
Pt    0.0356    0.5144    0.5817
Pt    0.0349    0.5817    0.5150
Pt    0.1044    0.5167    0.6042
Pt    0.1234    0.5164    0.6270
Pt    0.0155    0.6450    0.5610
Pt    0.0156    0.5826    0.5366
Pt    0.0153    0.6493    0.6036
Pt    0.0383    0.7108    0.5153
Pt    0.0370    0.6683    0.5157
Pt    0.1226    0.5821    0.5151
Pt    0.1235    0.5150    0.5819
Pt    0.0594    0.5160    0.5605
Pt    0.0789    0.5394    0.5159
Pt    0.0357    0.5160    0.5364
Pt    0.1476    0.5149    0.6019
Pt    0.1239    0.6274    0.5158
Pt    0.0356    0.6267    0.5158
Pt    0.0595    0.6485    0.5171
Pt    0.0187    0.7543    0.5354
Pt    0.1680    0.5363    0.5160
Pt    0.2123    0.5789    0.5160
Pt    0.0177    0.6694    0.6249
Pt    0.0161    0.6488    0.5160
Pt    0.0585    0.5155    0.5178
Pt    0.0152    0.6700    0.5364
Pt    0.0154    0.5148    0.5597
Pt    0.0818    0.6264    0.5149
Pt    0.0993    0.5148    0.6501
Pt    0.2545    0.7306    0.7532
Pt    0.2534    0.7297    0.7088
Pt    0.2544    0.7307    0.6643
Pt    0.2539    0.6870    0.7541
Pt    0.1435    0.5156    0.6487
Pt    0.2544    0.6875    0.7076
Pt    0.2555    0.6883    0.6629
Pt    0.0558    0.5367    0.6713
Pt    0.0584    0.5355    0.7127
Pt    0.0564    0.5813    0.6723
Pt    0.0559    0.5825    0.7105
Pt    0.0585    0.6219    0.6680
Pt    0.0571    0.6670    0.6680
Pt    0.0586    0.7107    0.7098
Pt    0.0547    0.7089    0.7521
Pt    0.0552    0.7563    0.7088
Pt    0.0564    0.7547    0.7537
Pt    0.1005    0.5364    0.6719
Pt    0.0977    0.5785    0.6692
Pt    0.0986    0.6221    0.6676
Pt    0.0988    0.6227    0.7109
Pt    0.1000    0.6654    0.6683
Pt    0.1004    0.6668    0.7093
Pt    0.0993    0.6664    0.7545
Pt    0.1008    0.7123    0.6670
Pt    0.1003    0.7113    0.7112
Pt    0.1011    0.7111    0.7531
Pt    0.0989    0.7561    0.6661
Pt    0.0998    0.7558    0.7097
Pt    0.0990    0.7555    0.7539
Pt    0.1443    0.5378    0.6722
Pt    0.1461    0.5744    0.6678
Pt    0.1466    0.5791    0.7095
Pt    0.1460    0.6203    0.6687
Pt    0.1437    0.6230    0.7114
Pt    0.1449    0.6220    0.7535
Pt    0.1441    0.6673    0.6652
Pt    0.1437    0.6662    0.7076
Pt    0.1429    0.6668    0.7517
Pt    0.1453    0.7105    0.6691
Pt    0.1440    0.7101    0.7094
Pt    0.1435    0.7112    0.7545
Pt    0.1432    0.7541    0.6667
Pt    0.1440    0.7535    0.7110
Pt    0.1439    0.7526    0.7541
Pt    0.1922    0.5745    0.6657
Pt    0.1918    0.5770    0.7084
Pt    0.1871    0.5762    0.7542
Pt    0.1877    0.6204    0.6665
Pt    0.1897    0.6221    0.7102
Pt    0.1875    0.6222    0.7522
Pt    0.1880    0.6656    0.6645
Pt    0.1886    0.6637    0.7080
Pt    0.1888    0.6659    0.7524
Pt    0.1894    0.7096    0.6661
Pt    0.1880    0.7081    0.7090
Pt    0.1873    0.7095    0.7530
Pt    0.1896    0.7530    0.6655
Pt    0.1881    0.7547    0.7121
Pt    0.1882    0.7521    0.7551
Pt    0.2314    0.5320    0.7124
Pt    0.2302    0.5341    0.7515
Pt    0.2318    0.5767    0.6654
Pt    0.2335    0.5764    0.7088
Pt    0.2317    0.5773    0.7544
Pt    0.2337    0.6194    0.6643
Pt    0.2320    0.6221    0.7090
Pt    0.2328    0.6232    0.7529
Pt    0.2309    0.6666    0.6657
Pt    0.2328    0.6659    0.7068
Pt    0.2325    0.6667    0.7520
Pt    0.2343    0.7103    0.6631
Pt    0.2324    0.7079    0.7076
Pt    0.2331    0.7110    0.7516
Pt    0.2322    0.7533    0.6637
Pt    0.2338    0.7508    0.7089
Pt    0.2328    0.7521    0.7555
Pt    0.2543    0.6441    0.7540
Pt    0.2318    0.6873    0.6429
Pt    0.2539    0.6447    0.7088
Pt    0.2525    0.7542    0.6408
Pt    0.2544    0.6426    0.6637
Pt    0.2555    0.5995    0.7533
Pt    0.2540    0.5991    0.7104
Pt    0.0565    0.5579    0.6481
Pt    0.0556    0.5593    0.6917
Pt    0.0573    0.6022    0.6456
Pt    0.0551    0.6072    0.6929
Pt    0.0593    0.6442    0.6468
Pt    0.0563    0.6843    0.6913
Pt    0.0577    0.6879    0.7307
Pt    0.0578    0.7317    0.6890
Pt    0.0570    0.7334    0.7322
Pt    0.1012    0.5579    0.6482
Pt    0.0988    0.5604    0.6930
Pt    0.1014    0.6007    0.6480
Pt    0.1020    0.5996    0.6896
Pt    0.0998    0.6434    0.6458
Pt    0.1011    0.6430    0.6882
Pt    0.1033    0.6447    0.7314
Pt    0.1009    0.6929    0.6450
Pt    0.0994    0.6883    0.6881
Pt    0.1021    0.6878    0.7310
Pt    0.0973    0.7347    0.6462
Pt    0.0998    0.7309    0.6901
Pt    0.1007    0.7348    0.7334
Pt    0.1477    0.5541    0.6457
Pt    0.1460    0.5987    0.6470
Pt    0.1451    0.6004    0.6905
Pt    0.1436    0.5982    0.7319
Pt    0.1454    0.6426    0.6463
Pt    0.1451    0.6425    0.6870
Pt    0.1445    0.6440    0.7322
Pt    0.1438    0.6884    0.6449
Pt    0.1440    0.6878    0.6889
Pt    0.1449    0.6876    0.7302
Pt    0.1418    0.7308    0.6432
Pt    0.1421    0.7326    0.6873
Pt    0.1449    0.7308    0.7324
Pt    0.1905    0.5533    0.6901
Pt    0.1859    0.5569    0.7282
Pt    0.1898    0.5979    0.6462
Pt    0.1879    0.5988    0.6858
Pt    0.1887    0.5989    0.7326
Pt    0.1879    0.6422    0.6447
Pt    0.1883    0.6440    0.6862
Pt    0.1885    0.6458    0.7305
Pt    0.1873    0.6871    0.6438
Pt    0.1869    0.6878    0.6862
Pt    0.1876    0.6866    0.7308
Pt    0.1884    0.7322    0.6439
Pt    0.1895    0.7319    0.6883
Pt    0.1876    0.7315    0.7307
Pt    0.2311    0.5539    0.6880
Pt    0.2320    0.5571    0.7303
Pt    0.2330    0.5978    0.6421
Pt    0.2310    0.6006    0.6883
Pt    0.2348    0.5998    0.7331
Pt    0.2333    0.6445    0.6431
Pt    0.2310    0.6438    0.6834
Pt    0.2331    0.6433    0.7301
Pt    0.2545    0.6195    0.6427
Pt    0.2317    0.6873    0.6872
Pt    0.2335    0.6859    0.7289
Pt    0.2325    0.7296    0.6415
Pt    0.2333    0.7299    0.6850
Pt    0.2322    0.7312    0.7301
Pt    0.0349    0.5363    0.6473
Pt    0.0354    0.5352    0.6933
Pt    0.0381    0.5374    0.7349
Pt    0.0377    0.5797    0.6492
Pt    0.0346    0.5816    0.6932
Pt    0.0360    0.6242    0.6479
Pt    0.0352    0.6669    0.6477
Pt    0.0369    0.7113    0.7309
Pt    0.0360    0.7549    0.7319
Pt    0.0786    0.5370    0.6475
Pt    0.0787    0.5379    0.6909
Pt    0.0766    0.5786    0.6454
Pt    0.0778    0.5826    0.6923
Pt    0.0793    0.6211    0.6456
Pt    0.0796    0.6215    0.6891
Pt    0.0794    0.6675    0.6473
Pt    0.0769    0.6646    0.6889
Pt    0.0801    0.6663    0.7324
Pt    0.0745    0.7121    0.6468
Pt    0.0779    0.7085    0.6873
Pt    0.0792    0.7105    0.7320
Pt    0.0765    0.7560    0.6881
Pt    0.0784    0.7568    0.7317
Pt    0.1229    0.5372    0.6479
Pt    0.1244    0.5788    0.6470
Pt    0.1234    0.5781    0.6908
Pt    0.1244    0.6217    0.6481
Pt    0.1238    0.6220    0.6916
Pt    0.1231    0.6204    0.7370
Pt    0.1196    0.6675    0.6447
Pt    0.1228    0.6660    0.6877
Pt    0.1219    0.6651    0.7314
Pt    0.1215    0.7130    0.6426
Pt    0.1217    0.7108    0.6867
Pt    0.1231    0.7106    0.7318
Pt    0.1222    0.7540    0.6444
Pt    0.1210    0.7540    0.6878
Pt    0.1227    0.7559    0.7317
Pt    0.1677    0.5332    0.6470
Pt    0.1690    0.5759    0.6461
Pt    0.1694    0.5759    0.6887
Pt    0.1660    0.5773    0.7321
Pt    0.1660    0.6193    0.6469
Pt    0.1675    0.6208    0.6900
Pt    0.1667    0.6220    0.7316
Pt    0.1668    0.6649    0.6454
Pt    0.1659    0.6649    0.6874
Pt    0.1659    0.6655    0.7303
Pt    0.1654    0.7111    0.6447
Pt    0.1688    0.7110    0.6883
Pt    0.1658    0.7109    0.7289
Pt    0.1656    0.7528    0.6459
Pt    0.1675    0.7539    0.6887
Pt    0.1654    0.7530    0.7329
Pt    0.2080    0.5334    0.7319
Pt    0.2133    0.5759    0.6440
Pt    0.2109    0.5778    0.6859
Pt    0.2111    0.5788    0.7309
Pt    0.2118    0.6199    0.6426
Pt    0.2106    0.6202    0.6888
Pt    0.2117    0.6207    0.7311
Pt    0.2090    0.6646    0.6441
Pt    0.2081    0.6676    0.6845
Pt    0.2106    0.6669    0.7308
Pt    0.2086    0.7102    0.6435
Pt    0.2098    0.7087    0.6887
Pt    0.2088    0.7077    0.7300
Pt    0.2118    0.7534    0.6418
Pt    0.2120    0.7534    0.6870
Pt    0.2109    0.7529    0.7328
Pt    0.2552    0.5320    0.7322
Pt    0.2532    0.5773    0.6877
Pt    0.2542    0.5768    0.7320
Pt    0.0786    0.5147    0.6701
Pt    0.2534    0.6235    0.6879
Pt    0.2538    0.6234    0.7312
Pt    0.2549    0.6668    0.6420
Pt    0.2546    0.6666    0.6835
Pt    0.2557    0.6656    0.7303
Pt    0.2531    0.7088    0.6409
Pt    0.2555    0.7088    0.6845
Pt    0.2554    0.7085    0.7308
Pt    0.2543    0.5961    0.6652
Pt    0.2532    0.7520    0.6868
Pt    0.2553    0.7516    0.7314
Pt    0.0355    0.5593    0.6709
Pt    0.0350    0.5588    0.7140
Pt    0.0357    0.6039    0.6709
Pt    0.0372    0.6439    0.6681
Pt    0.0360    0.7332    0.7113
Pt    0.0363    0.7317    0.7535
Pt    0.0775    0.5574    0.6701
Pt    0.0758    0.5584    0.7139
Pt    0.0790    0.6001    0.6699
Pt    0.0792    0.6429    0.6686
Pt    0.0814    0.6455    0.7105
Pt    0.0779    0.6881    0.6677
Pt    0.0798    0.6882    0.7116
Pt    0.0796    0.6894    0.7543
Pt    0.0767    0.7330    0.6685
Pt    0.0785    0.7337    0.7104
Pt    0.0780    0.7328    0.7526
Pt    0.1226    0.5570    0.6713
Pt    0.1228    0.5990    0.6679
Pt    0.1226    0.6021    0.7125
Pt    0.1224    0.6442    0.6661
Pt    0.1219    0.6448    0.7099
Pt    0.1212    0.6455    0.7544
Pt    0.1226    0.6884    0.6665
Pt    0.1222    0.6867    0.7104
Pt    0.1220    0.6896    0.7543
Pt    0.1196    0.7323    0.6665
Pt    0.1230    0.7310    0.7119
Pt    0.1222    0.7325    0.7536
Pt    0.1705    0.5530    0.6704
Pt    0.1655    0.5963    0.6677
Pt    0.1690    0.5993    0.7097
Pt    0.1657    0.5991    0.7538
Pt    0.1658    0.6420    0.6675
Pt    0.1654    0.6436    0.7083
Pt    0.1659    0.6452    0.7526
Pt    0.1663    0.6885    0.6655
Pt    0.1668    0.6869    0.7089
Pt    0.1649    0.6883    0.7521
Pt    0.1650    0.7343    0.6685
Pt    0.1671    0.7319    0.7081
Pt    0.1656    0.7316    0.7536
Pt    0.2103    0.5542    0.7101
Pt    0.2095    0.5574    0.7500
Pt    0.2121    0.5998    0.6646
Pt    0.2102    0.6010    0.7106
Pt    0.2112    0.5997    0.7547
Pt    0.2081    0.6430    0.6659
Pt    0.2121    0.6441    0.7068
Pt    0.2105    0.6442    0.7517
Pt    0.2110    0.6897    0.6649
Pt    0.2082    0.6855    0.7093
Pt    0.2109    0.6864    0.7533
Pt    0.2104    0.7318    0.6638
Pt    0.2114    0.7302    0.7080
Pt    0.2106    0.7293    0.7524
Pt    0.2530    0.5549    0.7096
Pt    0.2527    0.5565    0.7567
Pt    0.0800    0.5150    0.7136
Pt    0.0157    0.6462    0.6452
Pt    0.0154    0.5575    0.6490
Pt    0.0577    0.5175    0.6477
Pt    0.2513    0.5156    0.7566
Pt    0.1629    0.5157    0.6696
Pt    0.1024    0.5175    0.6935
Pt    0.0420    0.5162    0.7590
Pt    0.0376    0.5385    0.7749
Pt    0.2536    0.5982    0.8416
Pt    0.2510    0.5993    0.7974
Pt    0.2523    0.6439    0.8388
Pt    0.2550    0.5563    0.7980
Pt    0.2537    0.6890    0.7992
Pt    0.0601    0.5145    0.8175
Pt    0.2536    0.7303    0.8445
Pt    0.2529    0.7292    0.7986
Pt    0.0615    0.5362    0.7943
Pt    0.0606    0.5368    0.8397
Pt    0.0605    0.5375    0.8830
Pt    0.0598    0.5805    0.7965
Pt    0.0594    0.5794    0.8399
Pt    0.0608    0.5804    0.8812
Pt    0.0581    0.6250    0.8384
Pt    0.0584    0.6221    0.8818
Pt    0.0581    0.6665    0.8840
Pt    0.0576    0.7536    0.7980
Pt    0.1064    0.5338    0.8408
Pt    0.1048    0.5346    0.8837
Pt    0.1035    0.5778    0.8407
Pt    0.1057    0.5783    0.8844
Pt    0.1002    0.6232    0.7956
Pt    0.1027    0.6220    0.8393
Pt    0.1000    0.6240    0.8824
Pt    0.0997    0.6685    0.7956
Pt    0.1007    0.6649    0.8383
Pt    0.1024    0.6681    0.8843
Pt    0.1003    0.7117    0.7981
Pt    0.1024    0.7110    0.8431
Pt    0.0979    0.7122    0.8825
Pt    0.0976    0.7523    0.7991
Pt    0.0993    0.7536    0.8424
Pt    0.1021    0.7528    0.8867
Pt    0.1492    0.5365    0.8822
Pt    0.1484    0.5789    0.8398
Pt    0.1512    0.5780    0.8828
Pt    0.1458    0.6200    0.7966
Pt    0.1463    0.6220    0.8409
Pt    0.1479    0.6216    0.8846
Pt    0.1440    0.6663    0.7950
Pt    0.1464    0.6638    0.8403
Pt    0.1439    0.6657    0.8819
Pt    0.1440    0.7097    0.7979
Pt    0.1442    0.7102    0.8424
Pt    0.1438    0.7095    0.8842
Pt    0.1439    0.7530    0.7977
Pt    0.1462    0.7532    0.8418
Pt    0.1462    0.7525    0.8856
Pt    0.1854    0.5789    0.7970
Pt    0.1921    0.5781    0.8403
Pt    0.1918    0.5786    0.8858
Pt    0.1904    0.6230    0.7957
Pt    0.1906    0.6228    0.8413
Pt    0.1921    0.6224    0.8834
Pt    0.1889    0.6670    0.7955
Pt    0.1878    0.6652    0.8417
Pt    0.1900    0.6648    0.8864
Pt    0.1880    0.7088    0.7968
Pt    0.1895    0.7088    0.8441
Pt    0.1891    0.7072    0.8852
Pt    0.1886    0.7508    0.7992
Pt    0.1895    0.7531    0.8408
Pt    0.1894    0.7520    0.8851
Pt    0.2343    0.5368    0.8006
Pt    0.2321    0.5761    0.7980
Pt    0.2301    0.5762    0.8406
Pt    0.2317    0.6217    0.7962
Pt    0.2330    0.6216    0.8405
Pt    0.2337    0.6217    0.8845
Pt    0.2328    0.6652    0.7961
Pt    0.2317    0.6654    0.8401
Pt    0.2343    0.6656    0.8851
Pt    0.2323    0.7087    0.7979
Pt    0.2315    0.7091    0.8408
Pt    0.2335    0.7069    0.8862
Pt    0.2308    0.7519    0.7974
Pt    0.2331    0.7530    0.8427
Pt    0.2538    0.6409    0.7969
Pt    0.2116    0.7290    0.8875
Pt    0.2568    0.6001    0.8888
Pt    0.2539    0.6444    0.8845
Pt    0.2541    0.6881    0.8857
Pt    0.2543    0.6884    0.8416
Pt    0.0612    0.5565    0.8167
Pt    0.0599    0.5579    0.8610
Pt    0.0605    0.6020    0.8175
Pt    0.0594    0.6014    0.8589
Pt    0.0578    0.6460    0.8605
Pt    0.0576    0.7327    0.7745
Pt    0.1028    0.5548    0.8191
Pt    0.1041    0.5554    0.8617
Pt    0.1042    0.5999    0.8176
Pt    0.1048    0.6001    0.8624
Pt    0.1016    0.6437    0.7748
Pt    0.1009    0.6432    0.8171
Pt    0.1010    0.6438    0.8603
Pt    0.0984    0.6888    0.7750
Pt    0.1006    0.6893    0.8182
Pt    0.1019    0.6879    0.8625
Pt    0.0979    0.7330    0.7766
Pt    0.1009    0.7306    0.8204
Pt    0.1004    0.7327    0.8637
Pt    0.1504    0.5563    0.8591
Pt    0.1443    0.5993    0.7738
Pt    0.1448    0.5981    0.8171
Pt    0.1482    0.6022    0.8626
Pt    0.1459    0.6429    0.7745
Pt    0.1445    0.6425    0.8176
Pt    0.1464    0.6426    0.8613
Pt    0.1452    0.6894    0.7751
Pt    0.1470    0.6864    0.8200
Pt    0.1449    0.6864    0.8603
Pt    0.1440    0.7319    0.7756
Pt    0.1459    0.7302    0.8196
Pt    0.1451    0.7315    0.8636
Pt    0.1889    0.5965    0.7743
Pt    0.1880    0.5990    0.8194
Pt    0.1911    0.5994    0.8626
Pt    0.1881    0.6436    0.7723
Pt    0.1918    0.6428    0.8184
Pt    0.1881    0.6449    0.8630
Pt    0.1871    0.6881    0.7738
Pt    0.1881    0.6859    0.8182
Pt    0.1897    0.6859    0.8650
Pt    0.1897    0.7312    0.7759
Pt    0.1880    0.7270    0.8201
Pt    0.1871    0.7308    0.8646
Pt    0.2292    0.5556    0.7759
Pt    0.2325    0.6012    0.7738
Pt    0.2313    0.5994    0.8200
Pt    0.2328    0.5980    0.8613
Pt    0.2312    0.6458    0.7725
Pt    0.2312    0.6441    0.8180
Pt    0.2316    0.6441    0.8629
Pt    0.2325    0.6860    0.7761
Pt    0.2309    0.6856    0.8181
Pt    0.2327    0.6875    0.8623
Pt    0.2298    0.7306    0.7759
Pt    0.2300    0.7299    0.8214
Pt    0.2338    0.7330    0.8659
Pt    0.2308    0.7524    0.8874
Pt    0.0374    0.5370    0.8136
Pt    0.0386    0.5375    0.8621
Pt    0.0383    0.5797    0.8146
Pt    0.0382    0.5819    0.8599
Pt    0.0369    0.6240    0.8595
Pt    0.0365    0.7531    0.7750
Pt    0.0822    0.5349    0.8175
Pt    0.0818    0.5375    0.8611
Pt    0.0810    0.5785    0.8177
Pt    0.0827    0.5812    0.8603
Pt    0.0787    0.6235    0.8171
Pt    0.0792    0.6243    0.8595
Pt    0.0822    0.6661    0.8634
Pt    0.0765    0.7099    0.7764
Pt    0.0791    0.7089    0.8202
Pt    0.0785    0.7569    0.7763
Pt    0.0778    0.7524    0.8216
Pt    0.1285    0.5331    0.8620
Pt    0.1247    0.5766    0.8192
Pt    0.1265    0.5798    0.8620
Pt    0.1227    0.6210    0.7733
Pt    0.1244    0.6208    0.8178
Pt    0.1244    0.6220    0.8619
Pt    0.1224    0.6683    0.7739
Pt    0.1222    0.6659    0.8173
Pt    0.1224    0.6661    0.8618
Pt    0.1223    0.7108    0.7773
Pt    0.1225    0.7099    0.8210
Pt    0.1245    0.7095    0.8628
Pt    0.1212    0.7526    0.7768
Pt    0.1207    0.7530    0.8205
Pt    0.1226    0.7533    0.8643
Pt    0.1709    0.5762    0.8608
Pt    0.1675    0.6200    0.7753
Pt    0.1669    0.6222    0.8189
Pt    0.1698    0.6203    0.8605
Pt    0.1665    0.6665    0.7738
Pt    0.1676    0.6643    0.8180
Pt    0.1668    0.6649    0.8629
Pt    0.1662    0.7113    0.7761
Pt    0.1673    0.7078    0.8194
Pt    0.1660    0.7096    0.8638
Pt    0.1654    0.7517    0.7773
Pt    0.1669    0.7514    0.8196
Pt    0.1669    0.7541    0.8634
Pt    0.2110    0.5773    0.7775
Pt    0.2094    0.5771    0.8151
Pt    0.2111    0.6236    0.7727
Pt    0.2116    0.6204    0.8193
Pt    0.2121    0.6221    0.8629
Pt    0.2093    0.6661    0.7750
Pt    0.2084    0.6647    0.8198
Pt    0.2116    0.6658    0.8629
Pt    0.2102    0.7081    0.7754
Pt    0.2096    0.7072    0.8185
Pt    0.2105    0.7088    0.8649
Pt    0.2103    0.7557    0.7762
Pt    0.2102    0.7512    0.8221
Pt    0.2111    0.7538    0.8638
Pt    0.2541    0.5365    0.7777
Pt    0.2534    0.5767    0.7768
Pt    0.2512    0.5746    0.8210
Pt    0.2529    0.6224    0.7744
Pt    0.2544    0.6208    0.8180
Pt    0.2539    0.6214    0.8632
Pt    0.2561    0.6663    0.7740
Pt    0.2537    0.6656    0.8197
Pt    0.2551    0.6658    0.8615
Pt    0.2528    0.7096    0.7759
Pt    0.2545    0.7103    0.8211
Pt    0.2549    0.7102    0.8641
Pt    0.2528    0.7513    0.7774
Pt    0.2554    0.7530    0.8191
Pt    0.2559    0.7534    0.8639
Pt    0.0378    0.5600    0.7933
Pt    0.0361    0.5566    0.8348
Pt    0.0386    0.5587    0.8830
Pt    0.0384    0.6034    0.8361
Pt    0.0392    0.6010    0.8828
Pt    0.0353    0.6442    0.8817
Pt    0.0385    0.7325    0.7953
Pt    0.0824    0.5585    0.7958
Pt    0.0820    0.5582    0.8408
Pt    0.0828    0.5571    0.8837
Pt    0.0803    0.6035    0.8392
Pt    0.0804    0.6012    0.8814
Pt    0.0773    0.6454    0.8378
Pt    0.0780    0.6459    0.8821
Pt    0.0779    0.6894    0.7972
Pt    0.0815    0.6877    0.8424
Pt    0.0796    0.6873    0.8850
Pt    0.0751    0.7293    0.7988
Pt    0.0805    0.7309    0.8409
Pt    0.1270    0.5557    0.8413
Pt    0.1274    0.5573    0.8821
Pt    0.1232    0.5998    0.7949
Pt    0.1238    0.6003    0.8393
Pt    0.1269    0.6006    0.8833
Pt    0.1248    0.6444    0.7940
Pt    0.1237    0.6429    0.8394
Pt    0.1235    0.6454    0.8828
Pt    0.1223    0.6882    0.7966
Pt    0.1221    0.6863    0.8400
Pt    0.1224    0.6885    0.8839
Pt    0.1220    0.7324    0.7985
Pt    0.1228    0.7329    0.8418
Pt    0.1225    0.7287    0.8840
Pt    0.1706    0.5563    0.8815
Pt    0.1682    0.6009    0.7981
Pt    0.1674    0.5990    0.8389
Pt    0.1696    0.6006    0.8839
Pt    0.1697    0.6450    0.7958
Pt    0.1682    0.6432    0.8407
Pt    0.1681    0.6422    0.8848
Pt    0.1661    0.6873    0.7963
Pt    0.1681    0.6853    0.8416
Pt    0.1680    0.6875    0.8860
Pt    0.1656    0.7306    0.7975
Pt    0.1676    0.7295    0.8411
Pt    0.1675    0.7305    0.8833
Pt    0.2099    0.6001    0.7968
Pt    0.2110    0.6001    0.8399
Pt    0.2135    0.5998    0.8829
Pt    0.2107    0.6440    0.7960
Pt    0.2121    0.6445    0.8405
Pt    0.2134    0.6452    0.8855
Pt    0.2096    0.6873    0.7979
Pt    0.2088    0.6857    0.8415
Pt    0.2118    0.6874    0.8848
Pt    0.2109    0.7304    0.7990
Pt    0.2108    0.7316    0.8447
Pt    0.2301    0.5180    0.7782
Pt    0.0163    0.5150    0.8595
Pt    0.2550    0.5155    0.7999
Pt    0.0155    0.5375    0.8822
Pt    0.0362    0.5193    0.8367
Pt    0.2561    0.7320    0.8869
Pt    0.0167    0.5825    0.8355
Pt    0.0394    0.5159    0.7929
Pt    0.1281    0.5146    0.8840
Pt    0.0154    0.5615    0.8147
Pt    0.0159    0.6656    0.8833
Pt    0.0167    0.5171    0.7739
Pt    0.0379    0.5151    0.8845
Pt    0.0180    0.5589    0.8585
Pt    0.0596    0.5148    0.8622
Pt    0.0159    0.5995    0.8615
Pt    0.0828    0.5164    0.8391
Pt    0.0822    0.5146    0.8839
Pt    0.0160    0.6238    0.8838
Pt    0.0159    0.6213    0.8403
Pt    0.1245    0.6894    0.0144
Pt    0.0602    0.5149    0.9058
Pt    0.1039    0.5144    0.9070
Pt    0.2562    0.7317    0.9329
Pt    0.0804    0.5151    0.9710
Pt    0.0378    0.5156    0.9708
Pt    0.1717    0.5165    0.9741
Pt    0.2553    0.6439    0.9312
Pt    0.0157    0.5367    0.9706
Pt    0.0598    0.5364    0.9253
Pt    0.0601    0.5372    0.9736
Pt    0.0604    0.5817    0.9273
Pt    0.0614    0.5789    0.9685
Pt    0.0592    0.6233    0.9284
Pt    0.0573    0.6236    0.9702
Pt    0.0570    0.6691    0.9270
Pt    0.0615    0.6674    0.9705
Pt    0.0624    0.7120    0.9301
Pt    0.0597    0.7102    0.9723
Pt    0.1042    0.5362    0.9270
Pt    0.1025    0.5359    0.9713
Pt    0.1047    0.5794    0.9260
Pt    0.1051    0.5801    0.9705
Pt    0.1054    0.6229    0.9237
Pt    0.1026    0.6229    0.9691
Pt    0.1024    0.6655    0.9269
Pt    0.1049    0.6665    0.9723
Pt    0.1028    0.7093    0.9282
Pt    0.1039    0.7103    0.9718
Pt    0.1497    0.5363    0.9289
Pt    0.1508    0.5352    0.9717
Pt    0.1490    0.5787    0.9276
Pt    0.1473    0.5793    0.9723
Pt    0.1487    0.6231    0.9279
Pt    0.1471    0.6233    0.9731
Pt    0.1470    0.6661    0.9281
Pt    0.1476    0.6671    0.9726
Pt    0.1467    0.7087    0.9284
Pt    0.1459    0.7535    0.9308
Pt    0.1930    0.5352    0.9272
Pt    0.1928    0.5350    0.9714
Pt    0.1922    0.5779    0.9285
Pt    0.1958    0.5812    0.9741
Pt    0.1915    0.6227    0.9303
Pt    0.1924    0.6243    0.9733
Pt    0.1940    0.6656    0.9322
Pt    0.1902    0.7105    0.9316
Pt    0.1886    0.7517    0.9330
Pt    0.2384    0.5366    0.9696
Pt    0.2313    0.5801    0.9699
Pt    0.2342    0.6227    0.9321
Pt    0.2358    0.6670    0.9326
Pt    0.2336    0.7092    0.9299
Pt    0.2293    0.7518    0.9300
Pt    0.2323    0.7504    0.9744
Pt    0.2123    0.7292    0.9314
Pt    0.2134    0.6875    0.9322
Pt    0.0600    0.5157    0.9488
Pt    0.2547    0.6874    0.9298
Pt    0.1493    0.5147    0.9496
Pt    0.2152    0.6464    0.9322
Pt    0.0174    0.6687    0.9259
Pt    0.0374    0.7544    0.9910
Pt    0.2122    0.6036    0.9718
Pt    0.2143    0.6020    0.9303
Pt    0.2327    0.7514    0.0139
Pt    0.0162    0.5147    0.9933
Pt    0.2560    0.7288    0.9732
Pt    0.0598    0.5597    0.9059
Pt    0.0612    0.5575    0.9488
Pt    0.0575    0.5586    0.9947
Pt    0.0610    0.6005    0.9053
Pt    0.0600    0.6017    0.9484
Pt    0.0587    0.6022    0.9919
Pt    0.0568    0.6449    0.9022
Pt    0.0604    0.6464    0.9468
Pt    0.0586    0.6446    0.9922
Pt    0.0582    0.6914    0.9050
Pt    0.0597    0.6903    0.9487
Pt    0.0605    0.6892    0.9923
Pt    0.0617    0.7312    0.9510
Pt    0.0588    0.7340    0.9910
Pt    0.1053    0.5573    0.9046
Pt    0.1040    0.5583    0.9479
Pt    0.1031    0.5571    0.9925
Pt    0.1035    0.6025    0.9042
Pt    0.1050    0.6022    0.9475
Pt    0.1049    0.5998    0.9949
Pt    0.1032    0.6450    0.9048
Pt    0.1041    0.6459    0.9507
Pt    0.1012    0.6446    0.9944
Pt    0.1025    0.6899    0.9071
Pt    0.1036    0.6869    0.9499
Pt    0.1035    0.6888    0.9936
Pt    0.1019    0.7318    0.9072
Pt    0.1487    0.5561    0.9046
Pt    0.1506    0.5569    0.9508
Pt    0.1488    0.5579    0.9928
Pt    0.1496    0.6008    0.9038
Pt    0.1497    0.6027    0.9495
Pt    0.1469    0.6030    0.9934
Pt    0.1489    0.6440    0.9057
Pt    0.1483    0.6453    0.9518
Pt    0.1473    0.6451    0.9938
Pt    0.1452    0.6876    0.9056
Pt    0.1474    0.6884    0.9501
Pt    0.1471    0.7303    0.9082
Pt    0.1909    0.5557    0.9043
Pt    0.1924    0.5556    0.9493
Pt    0.1914    0.5573    0.9942
Pt    0.1910    0.6006    0.9077
Pt    0.1904    0.6014    0.9519
Pt    0.1923    0.6021    0.9955
Pt    0.1913    0.6436    0.9094
Pt    0.1925    0.6453    0.9521
Pt    0.1901    0.6863    0.9102
Pt    0.1887    0.6882    0.9517
Pt    0.1883    0.7314    0.9089
Pt    0.1898    0.7279    0.9524
Pt    0.2340    0.5586    0.9499
Pt    0.2357    0.5607    0.9926
Pt    0.2332    0.6012    0.9060
Pt    0.2345    0.6463    0.9089
Pt    0.2331    0.6877    0.9098
Pt    0.2341    0.6894    0.9524
Pt    0.2341    0.7299    0.9069
Pt    0.2334    0.7309    0.9529
Pt    0.2363    0.7300    0.9944
Pt    0.0379    0.5369    0.9046
Pt    0.0389    0.5382    0.9484
Pt    0.0376    0.5352    0.9924
Pt    0.0370    0.5808    0.9033
Pt    0.0392    0.5805    0.9494
Pt    0.0368    0.5810    0.9920
Pt    0.0379    0.6221    0.9051
Pt    0.0369    0.6227    0.9492
Pt    0.0359    0.6263    0.9918
Pt    0.0373    0.6685    0.9050
Pt    0.0358    0.6678    0.9465
Pt    0.0383    0.6677    0.9909
Pt    0.0388    0.7124    0.9479
Pt    0.0377    0.7109    0.9925
Pt    0.2138    0.5575    0.9724
Pt    0.0825    0.5354    0.9049
Pt    0.0829    0.5373    0.9485
Pt    0.0809    0.5373    0.9940
Pt    0.0815    0.5805    0.9037
Pt    0.0837    0.5812    0.9495
Pt    0.0827    0.5790    0.9932
Pt    0.0797    0.6251    0.9037
Pt    0.0807    0.6230    0.9493
Pt    0.0802    0.6236    0.9914
Pt    0.0790    0.6655    0.9056
Pt    0.0807    0.6680    0.9496
Pt    0.0813    0.6678    0.9923
Pt    0.0799    0.7116    0.9079
Pt    0.0827    0.7105    0.9501
Pt    0.0815    0.7142    0.9947
Pt    0.1271    0.5359    0.9061
Pt    0.1249    0.5376    0.9479
Pt    0.1261    0.5371    0.9937
Pt    0.1264    0.5782    0.9046
Pt    0.1279    0.5808    0.9493
Pt    0.1253    0.5798    0.9940
Pt    0.1276    0.6230    0.9044
Pt    0.1248    0.6226    0.9502
Pt    0.1242    0.6241    0.9939
Pt    0.1259    0.6642    0.9040
Pt    0.1260    0.6668    0.9502
Pt    0.1240    0.6679    0.9943
Pt    0.1243    0.7083    0.9070
Pt    0.1241    0.7081    0.9475
Pt    0.1258    0.7506    0.9043
Pt    0.1702    0.5349    0.9068
Pt    0.1724    0.5335    0.9496
Pt    0.1729    0.5361    0.9937
Pt    0.1703    0.5783    0.9048
Pt    0.1706    0.5790    0.9516
Pt    0.1711    0.5803    0.9949
Pt    0.1720    0.6238    0.9080
Pt    0.1690    0.6252    0.9535
Pt    0.1709    0.6215    0.9948
Pt    0.1699    0.6656    0.9061
Pt    0.1694    0.6658    0.9507
Pt    0.1670    0.7101    0.9065
Pt    0.1681    0.7523    0.9088
Pt    0.2138    0.5352    0.9505
Pt    0.2167    0.5374    0.9928
Pt    0.2122    0.5797    0.9069
Pt    0.2116    0.5781    0.9495
Pt    0.2158    0.5832    0.9973
Pt    0.2132    0.6238    0.9062
Pt    0.2137    0.6237    0.9517
Pt    0.2120    0.6656    0.9066
Pt    0.2097    0.7080    0.9092
Pt    0.2130    0.7101    0.9552
Pt    0.2095    0.7519    0.9086
Pt    0.2103    0.7501    0.9533
Pt    0.2566    0.5391    0.9920
Pt    0.2549    0.6238    0.9085
Pt    0.2581    0.6648    0.9095
Pt    0.2568    0.7088    0.9064
Pt    0.2549    0.7094    0.9503
Pt    0.2528    0.7515    0.9076
Pt    0.2522    0.7535    0.9525
Pt    0.2549    0.7538    0.9946
Pt    0.0381    0.5597    0.9270
Pt    0.0385    0.5597    0.9698
Pt    0.0354    0.6004    0.9264
Pt    0.0374    0.6021    0.9707
Pt    0.0364    0.6434    0.9267
Pt    0.0384    0.6470    0.9691
Pt    0.0380    0.6907    0.9260
Pt    0.0368    0.6895    0.9684
Pt    0.0393    0.7333    0.9689
Pt    0.0833    0.5586    0.9268
Pt    0.0834    0.5586    0.9705
Pt    0.0826    0.6035    0.9260
Pt    0.0824    0.5998    0.9719
Pt    0.0830    0.6440    0.9283
Pt    0.0813    0.6464    0.9715
Pt    0.0822    0.6863    0.9285
Pt    0.0821    0.6882    0.9712
Pt    0.0819    0.7310    0.9727
Pt    0.1262    0.5571    0.9269
Pt    0.1252    0.5583    0.9704
Pt    0.1277    0.6025    0.9246
Pt    0.1270    0.6016    0.9704
Pt    0.1269    0.6445    0.9301
Pt    0.1241    0.6451    0.9721
Pt    0.1230    0.6863    0.9277
Pt    0.1282    0.6912    0.9725
Pt    0.1254    0.7304    0.9272
Pt    0.1712    0.5563    0.9278
Pt    0.1715    0.5603    0.9727
Pt    0.1698    0.5992    0.9283
Pt    0.1698    0.6009    0.9736
Pt    0.1706    0.6452    0.9286
Pt    0.1708    0.6482    0.9751
Pt    0.1684    0.6880    0.9287
Pt    0.1680    0.7304    0.9299
Pt    0.2150    0.5582    0.9263
Pt    0.1483    0.5155    0.9949
Pt    0.2155    0.5152    0.9716
Pt    0.0823    0.5145    0.9282
Pt    0.0370    0.6029    0.0132
Pt    0.0363    0.7331    0.0142
Pt    0.0166    0.5381    0.0148
Pt    0.0163    0.5589    0.9053
Pt    0.0394    0.6906    0.0143
Pt    0.1040    0.5388    0.0147
Pt    0.0162    0.7116    0.9670
Pt    0.0155    0.5371    0.9258
Pt    0.0172    0.7314    0.9907
Pt    0.0161    0.6699    0.0131
Pt    0.0159    0.6896    0.9475
Pt    0.2379    0.5163    0.9918
Pt    0.0160    0.5599    0.9928
Pt    0.1456    0.6681    0.0136
Pt    0.0152    0.5794    0.9285
Pt    0.0379    0.5143    0.9269
Pt    0.1047    0.5145    0.9492
Pt    0.0157    0.6910    0.9908
Pt    0.0814    0.6912    0.0134
Pt    0.1019    0.5178    0.9942
Pt    0.0155    0.6233    0.9257
Pt    0.1277    0.5172    0.9705
Pt    0.0164    0.6016    0.9489
Pt    0.0595    0.5811    0.0130
Pt    0.1271    0.5592    0.0134
Pt    0.2148    0.5572    0.0139
Pt    0.1708    0.6428    0.0137
Pt    0.0377    0.6471    0.0136
Pt    0.0819    0.6015    0.0131
Pt    0.1266    0.6460    0.0145
Pt    0.1042    0.6239    0.0148
Pt    0.2538    0.9958    0.0580
Pt    0.1690    0.9942    0.0597
Pt    0.0826    0.9948    0.0171
Pt    0.2563    0.8636    0.1017
Pt    0.0815    0.8170    0.1016
Pt    0.2541    0.8201    0.1018
Pt    0.1674    0.9513    0.1036
Pt    0.2577    0.8180    0.0571
Pt    0.2554    0.7754    0.1012
Pt    0.1665    0.9487    0.0590
Pt    0.1249    0.9033    0.0580
Pt    0.2532    0.7777    0.0560
Pt    0.1682    0.9062    0.1021
Pt    0.1676    0.9063    0.0570
Pt    0.1235    0.9049    0.1029
Pt    0.0584    0.7940    0.0581
Pt    0.0151    0.8817    0.0175
Pt    0.0586    0.8400    0.0592
Pt    0.0583    0.8390    0.1032
Pt    0.1241    0.8627    0.1038
Pt    0.0591    0.8826    0.0587
Pt    0.0585    0.8826    0.1037
Pt    0.1264    0.8639    0.0577
Pt    0.0591    0.9264    0.0585
Pt    0.0589    0.9276    0.1026
Pt    0.2126    0.7776    0.0981
Pt    0.0574    0.9718    0.0593
Pt    0.0605    0.9693    0.1019
Pt    0.1050    0.7966    0.0984
Pt    0.0800    0.8158    0.0578
Pt    0.1028    0.8381    0.0559
Pt    0.1014    0.8406    0.1037
Pt    0.0817    0.8618    0.1023
Pt    0.1035    0.8828    0.0590
Pt    0.1021    0.8835    0.1043
Pt    0.1246    0.8196    0.1002
Pt    0.1025    0.9260    0.0596
Pt    0.1018    0.9264    0.1023
Pt    0.0808    0.9924    0.1044
Pt    0.1020    0.9724    0.0581
Pt    0.1026    0.9700    0.1020
Pt    0.1463    0.7987    0.1011
Pt    0.1460    0.8417    0.1018
Pt    0.0820    0.9045    0.0596
Pt    0.1479    0.8825    0.0566
Pt    0.1464    0.8830    0.1019
Pt    0.1660    0.8195    0.1017
Pt    0.1448    0.9258    0.0596
Pt    0.1437    0.9291    0.1054
Pt    0.0790    0.9940    0.0594
Pt    0.1462    0.9716    0.0607
Pt    0.1461    0.9726    0.1039
Pt    0.1878    0.7978    0.0989
Pt    0.1905    0.8411    0.0997
Pt    0.1891    0.8827    0.1015
Pt    0.0366    0.9924    0.1013
Pt    0.1898    0.9279    0.0577
Pt    0.1899    0.9268    0.1003
Pt    0.1676    0.7756    0.0975
Pt    0.1899    0.9723    0.0596
Pt    0.1884    0.9740    0.1045
Pt    0.1248    0.9926    0.1039
Pt    0.2315    0.7992    0.0570
Pt    0.2326    0.7972    0.1013
Pt    0.2344    0.8410    0.0995
Pt    0.2351    0.8843    0.0991
Pt    0.2292    0.9304    0.1028
Pt    0.1249    0.9493    0.0589
Pt    0.2367    0.9710    0.0571
Pt    0.1471    0.0140    0.0584
Pt    0.1694    0.9964    0.1025
Pt    0.1685    0.8597    0.1018
Pt    0.1030    0.9259    0.0155
Pt    0.1701    0.8592    0.0584
Pt    0.2130    0.9941    0.1032
Pt    0.2136    0.9934    0.0603
Pt    0.0812    0.9496    0.1030
Pt    0.2097    0.9513    0.1037
Pt    0.2139    0.9493    0.0587
Pt    0.0376    0.9920    0.0586
Pt    0.0807    0.9497    0.0581
Pt    0.2106    0.9047    0.0963
Pt    0.2117    0.8633    0.1014
Pt    0.2107    0.8188    0.1041
Pt    0.0586    0.7743    0.0361
Pt    0.0591    0.8161    0.0366
Pt    0.0595    0.8183    0.0805
Pt    0.0582    0.8604    0.0382
Pt    0.0583    0.8613    0.0816
Pt    0.0581    0.8623    0.1267
Pt    0.0598    0.9049    0.0375
Pt    0.0596    0.9035    0.0828
Pt    0.0592    0.9050    0.1253
Pt    0.0592    0.9499    0.0367
Pt    0.0590    0.9485    0.0799
Pt    0.0574    0.9471    0.1255
Pt    0.0607    0.9926    0.0367
Pt    0.0582    0.9924    0.0818
Pt    0.0580    0.9912    0.1252
Pt    0.1023    0.8172    0.0346
Pt    0.1044    0.8211    0.0811
Pt    0.0986    0.8186    0.1256
Pt    0.1026    0.8608    0.0348
Pt    0.1060    0.8587    0.0798
Pt    0.1016    0.8618    0.1254
Pt    0.1019    0.9058    0.0362
Pt    0.1023    0.9054    0.0818
Pt    0.1008    0.9047    0.1246
Pt    0.1030    0.9473    0.0392
Pt    0.1030    0.9499    0.0791
Pt    0.1005    0.9501    0.1255
Pt    0.1030    0.9945    0.0385
Pt    0.1026    0.9947    0.0801
Pt    0.1008    0.9934    0.1256
Pt    0.1441    0.7737    0.1197
Pt    0.1461    0.8190    0.1229
Pt    0.1490    0.8585    0.0332
Pt    0.1473    0.8621    0.0779
Pt    0.1435    0.8608    0.1249
Pt    0.1461    0.9047    0.0357
Pt    0.1471    0.9045    0.0823
Pt    0.1458    0.9063    0.1228
Pt    0.1452    0.9483    0.0382
Pt    0.1445    0.9507    0.0827
Pt    0.1464    0.9513    0.1250
Pt    0.1484    0.9926    0.0361
Pt    0.1467    0.9944    0.0826
Pt    0.1451    0.9948    0.1257
Pt    0.1905    0.7767    0.0774
Pt    0.1905    0.7750    0.1197
Pt    0.1923    0.8187    0.0785
Pt    0.1875    0.8209    0.1235
Pt    0.1924    0.8654    0.0795
Pt    0.1886    0.8620    0.1235
Pt    0.1918    0.9041    0.0383
Pt    0.1866    0.9063    0.0784
Pt    0.1890    0.9053    0.1237
Pt    0.1902    0.9506    0.0374
Pt    0.1871    0.9512    0.0813
Pt    0.1896    0.9506    0.1245
Pt    0.1913    0.9926    0.0381
Pt    0.1918    0.9956    0.0830
Pt    0.1915    0.9955    0.1244
Pt    0.2311    0.7725    0.0356
Pt    0.2324    0.7774    0.0787
Pt    0.2331    0.7748    0.1231
Pt    0.2323    0.8210    0.0758
Pt    0.2343    0.8184    0.1234
Pt    0.2350    0.8627    0.1214
Pt    0.2335    0.9056    0.1180
Pt    0.2326    0.9493    0.0360
Pt    0.2320    0.9532    0.0804
Pt    0.2343    0.9928    0.0358
Pt    0.2343    0.9920    0.0812
Pt    0.0370    0.7954    0.0362
Pt    0.0367    0.7951    0.0817
Pt    0.0369    0.8384    0.0350
Pt    0.0362    0.8355    0.0819
Pt    0.0347    0.8388    0.1254
Pt    0.0363    0.8812    0.0367
Pt    0.0369    0.8819    0.0821
Pt    0.0343    0.8820    0.1266
Pt    0.0371    0.9257    0.0375
Pt    0.0363    0.9275    0.0786
Pt    0.0381    0.9255    0.1242
Pt    0.0376    0.9711    0.0351
Pt    0.0365    0.9701    0.0813
Pt    0.0365    0.9701    0.1245
Pt    0.0810    0.7966    0.0341
Pt    0.0832    0.7974    0.0794
Pt    0.0793    0.8382    0.0384
Pt    0.0809    0.8418    0.0804
Pt    0.0769    0.8400    0.1273
Pt    0.0791    0.8830    0.0351
Pt    0.0826    0.8832    0.0826
Pt    0.0801    0.8831    0.1240
Pt    0.0800    0.9274    0.0381
Pt    0.0802    0.9273    0.0796
Pt    0.0805    0.9264    0.1234
Pt    0.0810    0.9708    0.0385
Pt    0.0805    0.9702    0.0795
Pt    0.0782    0.9689    0.1259
Pt    0.1215    0.7976    0.1219
Pt    0.1244    0.8387    0.0366
Pt    0.1274    0.8388    0.0769
Pt    0.1209    0.8394    0.1241
Pt    0.1249    0.8813    0.0358
Pt    0.1240    0.8825    0.0794
Pt    0.1251    0.8831    0.1248
Pt    0.1247    0.9265    0.0387
Pt    0.1246    0.9276    0.0806
Pt    0.1206    0.9275    0.1268
Pt    0.1242    0.9694    0.0369
Pt    0.1239    0.9711    0.0803
Pt    0.1246    0.9705    0.1255
Pt    0.1694    0.7972    0.1216
Pt    0.1662    0.8394    0.0813
Pt    0.1668    0.8406    0.1239
Pt    0.1690    0.8814    0.0379
Pt    0.1686    0.8833    0.0789
Pt    0.1661    0.8827    0.1241
Pt    0.1699    0.9261    0.0362
Pt    0.1646    0.9280    0.0825
Pt    0.1661    0.9306    0.1232
Pt    0.1695    0.9720    0.0397
Pt    0.1676    0.9741    0.0824
Pt    0.1678    0.9751    0.1245
Pt    0.2132    0.7988    0.0793
Pt    0.2093    0.7972    0.1226
Pt    0.2122    0.8404    0.0778
Pt    0.2109    0.8415    0.1208
Pt    0.2121    0.8840    0.1226
Pt    0.2123    0.9283    0.0374
Pt    0.2103    0.9291    0.0797
Pt    0.2089    0.9283    0.1220
Pt    0.2122    0.9722    0.0395
Pt    0.2097    0.9721    0.0828
Pt    0.2529    0.7997    0.0364
Pt    0.2557    0.7990    0.0816
Pt    0.2556    0.7963    0.1243
Pt    0.2555    0.8413    0.0778
Pt    0.2543    0.8413    0.1240
Pt    0.2549    0.8854    0.1216
Pt    0.2552    0.9710    0.0362
Pt    0.0799    0.8600    0.0160
Pt    0.0345    0.7744    0.0582
Pt    0.0808    0.9054    0.1027
Pt    0.0371    0.8175    0.0572
Pt    0.0392    0.8166    0.1053
Pt    0.0822    0.8618    0.0590
Pt    0.0353    0.8599    0.0579
Pt    0.0368    0.8600    0.1037
Pt    0.1241    0.9925    0.0592
Pt    0.0370    0.9028    0.0576
Pt    0.0369    0.9038    0.1042
Pt    0.1227    0.9506    0.1029
Pt    0.0370    0.9488    0.0578
Pt    0.0387    0.9490    0.1023
Pt    0.2138    0.7761    0.0568
Pt    0.0151    0.9068    0.1252
Pt    0.0172    0.9046    0.0801
Pt    0.0375    0.0131    0.0369
Pt    0.0371    0.9037    0.0153
Pt    0.0161    0.7978    0.0597
Pt    0.0160    0.8605    0.0801
Pt    0.0588    0.0140    0.1041
Pt    0.0157    0.0141    0.0157
Pt    0.0347    0.9489    0.0156
Pt    0.0800    0.9466    0.0166
Pt    0.1699    0.9036    0.0171
Pt    0.0599    0.8380    0.0154
Pt    0.0574    0.9266    0.0173
Pt    0.0159    0.9914    0.0796
Pt    0.1232    0.9926    0.0155
Pt    0.1457    0.9684    0.0178
Pt    0.0162    0.9246    0.0152
Pt    0.1029    0.9721    0.0164
Pt    0.0158    0.0140    0.0583
Pt    0.0158    0.9257    0.0604
Pt    0.0160    0.9260    0.1021
Pt    0.0792    0.0133    0.1263
Pt    0.0161    0.9459    0.1242
Pt    0.0591    0.9699    0.0156
Pt    0.1919    0.9253    0.0185
Pt    0.0151    0.9910    0.0370
Pt    0.1224    0.9483    0.0161
Pt    0.2318    0.7968    0.0157
Pt    0.1689    0.9906    0.0154
Pt    0.1253    0.9051    0.0150
Pt    0.1684    0.9478    0.0179
Pt    0.0796    0.9050    0.0153
Pt    0.1041    0.8831    0.0150
Pt    0.0168    0.9700    0.0574
Pt    0.1698    0.0140    0.0355
Pt    0.1262    0.0141    0.0359
Pt    0.2523    0.9943    0.2326
Pt    0.2521    0.9072    0.1438
Pt    0.2539    0.9517    0.2327
Pt    0.2545    0.8643    0.2325
Pt    0.2544    0.7749    0.1454
Pt    0.2522    0.9493    0.1855
Pt    0.2550    0.8628    0.1448
Pt    0.0573    0.7991    0.2275
Pt    0.0574    0.8845    0.1460
Pt    0.0570    0.9265    0.1480
Pt    0.0581    0.9262    0.1906
Pt    0.0578    0.9704    0.1487
Pt    0.0578    0.9692    0.1917
Pt    0.0608    0.9682    0.2346
Pt    0.1025    0.7972    0.1438
Pt    0.0988    0.7963    0.1864
Pt    0.1026    0.7986    0.2313
Pt    0.0997    0.8383    0.1465
Pt    0.1002    0.8391    0.1882
Pt    0.1011    0.8422    0.2317
Pt    0.1020    0.8831    0.1461
Pt    0.1019    0.8805    0.1896
Pt    0.0996    0.8852    0.2332
Pt    0.1020    0.9276    0.1482
Pt    0.0992    0.9271    0.1915
Pt    0.1008    0.9263    0.2319
Pt    0.1018    0.9693    0.1476
Pt    0.1027    0.9719    0.1904
Pt    0.1449    0.7972    0.1440
Pt    0.1452    0.7971    0.1888
Pt    0.1424    0.7948    0.2339
Pt    0.1448    0.8388    0.1463
Pt    0.1451    0.8382    0.1893
Pt    0.1421    0.8398    0.2330
Pt    0.1453    0.8837    0.1452
Pt    0.1459    0.8835    0.1886
Pt    0.1447    0.8859    0.2338
Pt    0.1445    0.9276    0.1468
Pt    0.1459    0.9267    0.1887
Pt    0.1429    0.9259    0.2315
Pt    0.1475    0.9729    0.1477
Pt    0.1894    0.7970    0.1452
Pt    0.1886    0.7956    0.1896
Pt    0.1880    0.7974    0.2314
Pt    0.1905    0.8408    0.1449
Pt    0.1891    0.8391    0.1900
Pt    0.1895    0.8419    0.2327
Pt    0.1898    0.8828    0.1461
Pt    0.1875    0.8831    0.1886
Pt    0.1877    0.8844    0.2338
Pt    0.1879    0.9287    0.1461
Pt    0.1886    0.9304    0.1890
Pt    0.1902    0.9297    0.2337
Pt    0.2331    0.7971    0.1452
Pt    0.2319    0.7956    0.1880
Pt    0.2319    0.7979    0.2329
Pt    0.2326    0.8407    0.1459
Pt    0.2321    0.8403    0.1874
Pt    0.2339    0.8418    0.2340
Pt    0.1020    0.0134    0.1475
Pt    0.2316    0.8847    0.1877
Pt    0.2310    0.8860    0.2314
Pt    0.2552    0.0117    0.2554
Pt    0.2300    0.9300    0.1847
Pt    0.2306    0.9279    0.2304
Pt    0.2326    0.9716    0.2306
Pt    0.2321    0.8849    0.1443
Pt    0.2519    0.8639    0.1886
Pt    0.2526    0.9077    0.2319
Pt    0.2530    0.8198    0.2325
Pt    0.2536    0.8194    0.1874
Pt    0.2544    0.9085    0.1875
Pt    0.2552    0.8186    0.1446
Pt    0.2563    0.7771    0.2331
Pt    0.0554    0.7722    0.2091
Pt    0.0558    0.7748    0.2537
Pt    0.0573    0.8182    0.2510
Pt    0.0574    0.8602    0.1671
Pt    0.0595    0.9056    0.1699
Pt    0.0564    0.9481    0.1707
Pt    0.0584    0.9454    0.2140
Pt    0.0586    0.9928    0.1687
Pt    0.0587    0.9918    0.2151
Pt    0.0600    0.9925    0.2521
Pt    0.0998    0.7756    0.1622
Pt    0.1027    0.7751    0.2096
Pt    0.0992    0.7774    0.2527
Pt    0.0982    0.8171    0.1659
Pt    0.1003    0.8190    0.2096
Pt    0.0996    0.8178    0.2538
Pt    0.1014    0.8604    0.1687
Pt    0.1003    0.8606    0.2119
Pt    0.0997    0.8628    0.2539
Pt    0.1000    0.9043    0.1694
Pt    0.1029    0.9036    0.2109
Pt    0.1030    0.9472    0.1702
Pt    0.1016    0.9493    0.2114
Pt    0.1032    0.9932    0.1701
Pt    0.1032    0.9927    0.2108
Pt    0.1441    0.7757    0.1665
Pt    0.1454    0.7748    0.2112
Pt    0.1447    0.7744    0.2535
Pt    0.1440    0.8176    0.1666
Pt    0.1447    0.8184    0.2093
Pt    0.1436    0.8181    0.2529
Pt    0.1446    0.8602    0.1678
Pt    0.1437    0.8617    0.2126
Pt    0.1438    0.8643    0.2553
Pt    0.1437    0.9057    0.1690
Pt    0.1457    0.9059    0.2110
Pt    0.1452    0.9075    0.2547
Pt    0.1437    0.9492    0.1691
Pt    0.1473    0.9923    0.1686
Pt    0.1904    0.7759    0.1664
Pt    0.1889    0.7745    0.2113
Pt    0.1861    0.7754    0.2548
Pt    0.1882    0.8195    0.1669
Pt    0.1912    0.8176    0.2104
Pt    0.1865    0.8200    0.2548
Pt    0.1890    0.8618    0.1673
Pt    0.1889    0.8641    0.2115
Pt    0.1876    0.8630    0.2551
Pt    0.1892    0.9063    0.1677
Pt    0.1883    0.9064    0.2099
Pt    0.1891    0.9076    0.2555
Pt    0.1863    0.9503    0.1668
Pt    0.1874    0.9502    0.2133
Pt    0.1857    0.9498    0.2520
Pt    0.2323    0.7754    0.1662
Pt    0.2333    0.7755    0.2108
Pt    0.2311    0.7757    0.2544
Pt    0.2315    0.8179    0.1652
Pt    0.2328    0.8188    0.2104
Pt    0.2296    0.8191    0.2546
Pt    0.2322    0.8656    0.1659
Pt    0.2323    0.8630    0.2108
Pt    0.2333    0.8630    0.2540
Pt    0.2337    0.9087    0.1663
Pt    0.2313    0.9082    0.2088
Pt    0.2300    0.9070    0.2533
Pt    0.2316    0.9514    0.2041
Pt    0.2339    0.9510    0.2555
Pt    0.2313    0.9917    0.2525
Pt    0.0367    0.7973    0.2521
Pt    0.0347    0.8817    0.1686
Pt    0.0338    0.9271    0.1695
Pt    0.0365    0.9271    0.2146
Pt    0.0370    0.9711    0.1703
Pt    0.0371    0.9699    0.2137
Pt    0.0372    0.9686    0.2554
Pt    0.0808    0.7946    0.2105
Pt    0.0777    0.7971    0.2534
Pt    0.0787    0.8396    0.1683
Pt    0.0783    0.8398    0.2099
Pt    0.0789    0.8403    0.2565
Pt    0.0787    0.8835    0.1676
Pt    0.0790    0.9275    0.1679
Pt    0.0794    0.9237    0.2121
Pt    0.0807    0.9690    0.1700
Pt    0.0817    0.9704    0.2140
Pt    0.1226    0.7969    0.1658
Pt    0.1227    0.7965    0.2080
Pt    0.1226    0.7966    0.2539
Pt    0.1215    0.8385    0.1664
Pt    0.1225    0.8388    0.2104
Pt    0.1210    0.8381    0.2546
Pt    0.1238    0.8819    0.1676
Pt    0.1231    0.8830    0.2122
Pt    0.1215    0.8860    0.2547
Pt    0.1224    0.9262    0.1697
Pt    0.1219    0.9270    0.2091
Pt    0.1242    0.9714    0.1680
Pt    0.1673    0.7972    0.1670
Pt    0.1667    0.7984    0.2107
Pt    0.1663    0.7975    0.2532
Pt    0.1672    0.8405    0.1699
Pt    0.1688    0.8407    0.2104
Pt    0.1643    0.8420    0.2560
Pt    0.1667    0.8824    0.1650
Pt    0.1651    0.8828    0.2106
Pt    0.1664    0.8855    0.2563
Pt    0.1664    0.9270    0.1680
Pt    0.1671    0.9273    0.2113
Pt    0.1657    0.9292    0.2543
Pt    0.1680    0.9713    0.1725
Pt    0.2102    0.7978    0.1675
Pt    0.2119    0.7978    0.2099
Pt    0.2082    0.7983    0.2547
Pt    0.2114    0.8417    0.1655
Pt    0.2128    0.8424    0.2114
Pt    0.2090    0.8417    0.2537
Pt    0.2104    0.8849    0.1637
Pt    0.2110    0.8837    0.2103
Pt    0.2103    0.8854    0.2550
Pt    0.2093    0.9302    0.1646
Pt    0.2096    0.9294    0.2092
Pt    0.2110    0.9299    0.2540
Pt    0.2106    0.9702    0.2561
Pt    0.2543    0.7977    0.1666
Pt    0.2558    0.7969    0.2096
Pt    0.2538    0.7979    0.2555
Pt    0.2538    0.8412    0.1663
Pt    0.2543    0.8416    0.2092
Pt    0.2535    0.8419    0.2537
Pt    0.2544    0.8858    0.1652
Pt    0.2519    0.8862    0.2098
Pt    0.2534    0.8841    0.2547
Pt    0.2526    0.9320    0.1604
Pt    0.2535    0.9319    0.2097
Pt    0.2539    0.9295    0.2530
Pt    0.2520    0.9710    0.2093
Pt    0.2556    0.9727    0.2534
Pt    0.0372    0.7768    0.2306
Pt    0.0332    0.8604    0.1471
Pt    0.0362    0.9049    0.1496
Pt    0.0376    0.9067    0.1907
Pt    0.0376    0.9489    0.1457
Pt    0.0347    0.9457    0.1941
Pt    0.0361    0.9499    0.2349
Pt    0.0365    0.9928    0.1468
Pt    0.0376    0.9927    0.1915
Pt    0.0375    0.9907    0.2329
Pt    0.0786    0.7744    0.1882
Pt    0.0785    0.7756    0.2312
Pt    0.0787    0.8181    0.1886
Pt    0.0802    0.8197    0.2324
Pt    0.0800    0.8624    0.1469
Pt    0.0788    0.8626    0.1891
Pt    0.0798    0.9053    0.1474
Pt    0.0808    0.9027    0.1902
Pt    0.0785    0.9505    0.1466
Pt    0.0776    0.9473    0.1917
Pt    0.0816    0.9489    0.2325
Pt    0.0794    0.9905    0.1469
Pt    0.0783    0.9920    0.1919
Pt    0.0815    0.9931    0.2329
Pt    0.1237    0.7748    0.1417
Pt    0.1213    0.7761    0.1866
Pt    0.1221    0.7736    0.2329
Pt    0.1237    0.8184    0.1435
Pt    0.1214    0.8180    0.1881
Pt    0.1213    0.8186    0.2325
Pt    0.1228    0.8599    0.1471
Pt    0.1237    0.8616    0.1905
Pt    0.1222    0.8633    0.2338
Pt    0.1235    0.9049    0.1456
Pt    0.1231    0.9036    0.1888
Pt    0.1218    0.9068    0.2312
Pt    0.1236    0.9494    0.1471
Pt    0.1241    0.9513    0.1904
Pt    0.1224    0.9916    0.1476
Pt    0.1247    0.9928    0.1918
Pt    0.1677    0.7765    0.1439
Pt    0.1679    0.7757    0.1874
Pt    0.1658    0.7754    0.2317
Pt    0.1693    0.8202    0.1463
Pt    0.1676    0.8172    0.1901
Pt    0.1678    0.8210    0.2321
Pt    0.1676    0.8598    0.1475
Pt    0.1668    0.8612    0.1901
Pt    0.1660    0.8614    0.2320
Pt    0.1674    0.9068    0.1456
Pt    0.1683    0.9070    0.1898
Pt    0.1677    0.9070    0.2343
Pt    0.1668    0.9506    0.1472
Pt    0.1647    0.9502    0.1909
Pt    0.1743    0.9916    0.1478
Pt    0.2112    0.7763    0.1436
Pt    0.2105    0.7759    0.1887
Pt    0.2087    0.7762    0.2332
Pt    0.2115    0.8185    0.1434
Pt    0.2112    0.8186    0.1883
Pt    0.2107    0.8196    0.2321
Pt    0.2118    0.8620    0.1433
Pt    0.2095    0.8617    0.1900
Pt    0.2104    0.8646    0.2329
Pt    0.2102    0.9071    0.1429
Pt    0.2102    0.9062    0.1879
Pt    0.2085    0.9062    0.2310
Pt    0.2070    0.9522    0.1866
Pt    0.2137    0.9497    0.2313
Pt    0.2525    0.7739    0.1872
Pt    0.1263    0.0122    0.1711
Pt    0.2299    0.9263    0.1429
Pt    0.0152    0.9721    0.2349
Pt    0.0158    0.7977    0.2304
Pt    0.1678    0.0118    0.1683
Pt    0.0158    0.9690    0.1931
Pt    0.0154    0.9902    0.2578
Pt    0.0152    0.7760    0.2527
Pt    0.1442    0.0125    0.1476
Pt    0.0799    0.0137    0.1691
Pt    0.0168    0.0102    0.2368
Pt    0.0158    0.9927    0.1702
Pt    0.0392    0.0137    0.2550
Pt    0.0355    0.0140    0.1685
Pt    0.0581    0.0141    0.1927
Pt    0.2339    0.7773    0.3858
Pt    0.1887    0.8196    0.3823
Pt    0.2545    0.9935    0.2771
Pt    0.2521    0.9521    0.3625
Pt    0.2559    0.9506    0.3192
Pt    0.0572    0.7938    0.2765
Pt    0.0551    0.7937    0.3209
Pt    0.0572    0.8360    0.2744
Pt    0.0553    0.8373    0.3200
Pt    0.0561    0.8399    0.3645
Pt    0.0580    0.8827    0.3614
Pt    0.0562    0.9279    0.3613
Pt    0.0611    0.9714    0.3170
Pt    0.0603    0.9727    0.3603
Pt    0.0994    0.7957    0.2745
Pt    0.0998    0.7960    0.3203
Pt    0.0967    0.7956    0.3648
Pt    0.0993    0.8407    0.2766
Pt    0.0995    0.8404    0.3193
Pt    0.0988    0.8391    0.3632
Pt    0.0991    0.8835    0.2751
Pt    0.0972    0.8854    0.3186
Pt    0.0979    0.8822    0.3609
Pt    0.0998    0.9265    0.3618
Pt    0.1009    0.9707    0.3616
Pt    0.1415    0.7980    0.2747
Pt    0.1420    0.7955    0.3192
Pt    0.1450    0.7952    0.3615
Pt    0.1431    0.8409    0.2761
Pt    0.1424    0.8396    0.3209
Pt    0.1447    0.8391    0.3639
Pt    0.1427    0.8852    0.2757
Pt    0.1429    0.8828    0.3168
Pt    0.1447    0.8835    0.3636
Pt    0.1434    0.9287    0.2756
Pt    0.1438    0.9316    0.3177
Pt    0.1447    0.9271    0.3615
Pt    0.1448    0.9731    0.3609
Pt    0.1872    0.7989    0.2767
Pt    0.1881    0.7980    0.3184
Pt    0.1891    0.7983    0.3632
Pt    0.1855    0.8418    0.2754
Pt    0.1881    0.8398    0.3190
Pt    0.1877    0.8428    0.3648
Pt    0.1894    0.8845    0.2760
Pt    0.1871    0.8857    0.3214
Pt    0.1868    0.8830    0.3630
Pt    0.1888    0.9281    0.2755
Pt    0.1884    0.9263    0.3219
Pt    0.1881    0.9295    0.3634
Pt    0.1885    0.9683    0.2749
Pt    0.1858    0.9741    0.3149
Pt    0.1915    0.9744    0.3644
Pt    0.2308    0.7973    0.2757
Pt    0.2330    0.7979    0.3167
Pt    0.2323    0.7976    0.3616
Pt    0.2304    0.8411    0.2767
Pt    0.2317    0.8406    0.3205
Pt    0.2325    0.8421    0.3643
Pt    0.2335    0.8859    0.2756
Pt    0.2309    0.8844    0.3179
Pt    0.2319    0.8835    0.3637
Pt    0.2324    0.9290    0.2776
Pt    0.2292    0.9260    0.3202
Pt    0.2342    0.9295    0.3623
Pt    0.2332    0.9726    0.2768
Pt    0.2336    0.9712    0.3203
Pt    0.2532    0.8172    0.3631
Pt    0.2561    0.8191    0.3198
Pt    0.2546    0.9499    0.2779
Pt    0.2540    0.9080    0.3632
Pt    0.2515    0.9059    0.3212
Pt    0.2545    0.9073    0.2746
Pt    0.2530    0.8635    0.2779
Pt    0.2568    0.8615    0.3632
Pt    0.2541    0.8625    0.3211
Pt    0.0558    0.7734    0.2980
Pt    0.0571    0.7730    0.3425
Pt    0.0580    0.8162    0.2980
Pt    0.0569    0.8176    0.3424
Pt    0.0580    0.8602    0.3425
Pt    0.0579    0.8609    0.3833
Pt    0.0546    0.9024    0.3384
Pt    0.0561    0.9065    0.3845
Pt    0.0601    0.9503    0.3389
Pt    0.0595    0.9492    0.3828
Pt    0.0584    0.9936    0.2974
Pt    0.0588    0.9944    0.3378
Pt    0.0612    0.9946    0.3819
Pt    0.0983    0.7736    0.2991
Pt    0.0998    0.7750    0.3413
Pt    0.0997    0.7770    0.3869
Pt    0.0987    0.8175    0.2978
Pt    0.0981    0.8168    0.3434
Pt    0.0160    0.0121    0.3605
Pt    0.0968    0.8613    0.2987
Pt    0.0984    0.8610    0.3408
Pt    0.1003    0.8617    0.3847
Pt    0.1030    0.9083    0.2979
Pt    0.0998    0.9053    0.3388
Pt    0.0994    0.9061    0.3839
Pt    0.1026    0.9505    0.3366
Pt    0.1033    0.9496    0.3823
Pt    0.1028    0.9962    0.3386
Pt    0.1028    0.9938    0.3824
Pt    0.1412    0.7747    0.2985
Pt    0.1431    0.7760    0.3388
Pt    0.1446    0.7752    0.3841
Pt    0.1417    0.8190    0.2994
Pt    0.1422    0.8180    0.3439
Pt    0.1436    0.8181    0.3866
Pt    0.1433    0.8624    0.2967
Pt    0.1431    0.8631    0.3402
Pt    0.1423    0.8615    0.3862
Pt    0.1437    0.9052    0.2964
Pt    0.1428    0.9036    0.3411
Pt    0.1459    0.9063    0.3830
Pt    0.1476    0.9508    0.3397
Pt    0.1444    0.9502    0.3822
Pt    0.1461    0.9917    0.3831
Pt    0.1861    0.7758    0.2980
Pt    0.1892    0.7769    0.3411
Pt    0.1903    0.7779    0.3857
Pt    0.1867    0.8185    0.2974
Pt    0.1887    0.8185    0.3403
Pt    0.2557    0.0119    0.2986
Pt    0.1872    0.8650    0.2996
Pt    0.1867    0.8617    0.3406
Pt    0.1903    0.8649    0.3861
Pt    0.1879    0.9077    0.2968
Pt    0.1879    0.9067    0.3437
Pt    0.1886    0.9026    0.3853
Pt    0.1888    0.9502    0.2970
Pt    0.1877    0.9529    0.3413
Pt    0.1900    0.9503    0.3847
Pt    0.2315    0.7761    0.2943
Pt    0.2308    0.7762    0.3392
Pt    0.0161    0.9925    0.3847
Pt    0.2314    0.8197    0.2966
Pt    0.2331    0.8189    0.3396
Pt    0.2353    0.8189    0.3879
Pt    0.2310    0.8640    0.2967
Pt    0.2303    0.8634    0.3413
Pt    0.0156    0.9072    0.3407
Pt    0.2316    0.9063    0.2989
Pt    0.2307    0.9040    0.3423
Pt    0.2312    0.9069    0.3835
Pt    0.2309    0.9500    0.3002
Pt    0.2322    0.9483    0.3400
Pt    0.2335    0.9934    0.3006
Pt    0.0355    0.7949    0.2981
Pt    0.0343    0.8829    0.3833
Pt    0.0386    0.9293    0.3402
Pt    0.0353    0.9262    0.3821
Pt    0.0376    0.9712    0.2970
Pt    0.0379    0.9712    0.3377
Pt    0.0359    0.9717    0.3807
Pt    0.0785    0.7943    0.2987
Pt    0.0764    0.7951    0.3416
Pt    0.0767    0.8404    0.2983
Pt    0.0782    0.8393    0.3412
Pt    0.0798    0.8384    0.3864
Pt    0.0769    0.8833    0.3388
Pt    0.0786    0.8850    0.3841
Pt    0.0777    0.9253    0.3377
Pt    0.0798    0.9298    0.3832
Pt    0.0834    0.9743    0.3376
Pt    0.0807    0.9713    0.3810
Pt    0.1206    0.7959    0.2985
Pt    0.1206    0.7978    0.3417
Pt    0.1217    0.7952    0.3862
Pt    0.1205    0.8405    0.2993
Pt    0.1213    0.8414    0.3431
Pt    0.1213    0.8397    0.3866
Pt    0.1196    0.8826    0.2968
Pt    0.1187    0.8841    0.3395
Pt    0.1202    0.8845    0.3819
Pt    0.1246    0.9279    0.2955
Pt    0.1232    0.9281    0.3386
Pt    0.1230    0.9275    0.3810
Pt    0.1223    0.9731    0.3398
Pt    0.1225    0.9717    0.3826
Pt    0.1642    0.7986    0.2967
Pt    0.1669    0.7975    0.3420
Pt    0.1665    0.7967    0.3853
Pt    0.1646    0.8403    0.2988
Pt    0.1671    0.8412    0.3433
Pt    0.1649    0.8397    0.3861
Pt    0.1658    0.8861    0.2981
Pt    0.1651    0.8844    0.3424
Pt    0.1654    0.8821    0.3846
Pt    0.1655    0.9265    0.2992
Pt    0.1662    0.9281    0.3406
Pt    0.1671    0.9270    0.3825
Pt    0.1668    0.9739    0.3393
Pt    0.1694    0.9736    0.3828
Pt    0.2100    0.7964    0.2973
Pt    0.2110    0.7989    0.3405
Pt    0.2123    0.7987    0.3851
Pt    0.2083    0.8417    0.2975
Pt    0.2096    0.8418    0.3419
Pt    0.2112    0.8415    0.3858
Pt    0.2096    0.8826    0.2967
Pt    0.2096    0.8835    0.3399
Pt    0.2129    0.8839    0.3868
Pt    0.2099    0.9277    0.2984
Pt    0.2102    0.9267    0.3429
Pt    0.2106    0.9273    0.3840
Pt    0.2101    0.9722    0.2979
Pt    0.2114    0.9703    0.3415
Pt    0.2544    0.7968    0.2972
Pt    0.2527    0.7954    0.3396
Pt    0.2560    0.7965    0.3862
Pt    0.2523    0.8420    0.2992
Pt    0.2515    0.8413    0.3434
Pt    0.2560    0.8401    0.3858
Pt    0.2530    0.8841    0.2989
Pt    0.2526    0.8831    0.3429
Pt    0.2548    0.8858    0.3861
Pt    0.2530    0.9283    0.2987
Pt    0.2560    0.9313    0.3413
Pt    0.2545    0.9317    0.3864
Pt    0.2539    0.9711    0.2991
Pt    0.2536    0.9727    0.3411
Pt    0.0349    0.7739    0.2754
Pt    0.0366    0.8153    0.3188
Pt    0.0366    0.8632    0.3622
Pt    0.0370    0.9043    0.3611
Pt    0.0406    0.9494    0.3155
Pt    0.0382    0.9513    0.3610
Pt    0.0404    0.9912    0.2744
Pt    0.0360    0.9931    0.3165
Pt    0.0373    0.9944    0.3576
Pt    0.0777    0.7736    0.2742
Pt    0.0751    0.7724    0.3192
Pt    0.0764    0.7729    0.3636
Pt    0.0772    0.8175    0.2770
Pt    0.0772    0.8167    0.3212
Pt    0.0762    0.8163    0.3652
Pt    0.0766    0.8619    0.2755
Pt    0.0750    0.8650    0.3160
Pt    0.0788    0.8614    0.3635
Pt    0.0783    0.9047    0.3600
Pt    0.0817    0.9484    0.3569
Pt    0.0840    0.9970    0.3178
Pt    0.0828    0.9956    0.3605
Pt    0.1209    0.7743    0.2775
Pt    0.1211    0.7732    0.3193
Pt    0.1219    0.7753    0.3605
Pt    0.1204    0.8176    0.2781
Pt    0.1199    0.8186    0.3217
Pt    0.1208    0.8177    0.3648
Pt    0.1217    0.8615    0.2730
Pt    0.1199    0.8633    0.3191
Pt    0.1219    0.8636    0.3620
Pt    0.1210    0.9067    0.2743
Pt    0.1242    0.9062    0.3177
Pt    0.1215    0.9064    0.3609
Pt    0.1250    0.9496    0.3604
Pt    0.1240    0.9929    0.3609
Pt    0.1655    0.7781    0.2763
Pt    0.1642    0.7782    0.3184
Pt    0.1675    0.7755    0.3619
Pt    0.1624    0.8186    0.2766
Pt    0.1634    0.8193    0.3201
Pt    0.1661    0.8169    0.3632
Pt    0.1672    0.8663    0.2772
Pt    0.1649    0.8611    0.3221
Pt    0.1647    0.8619    0.3633
Pt    0.1672    0.9070    0.2765
Pt    0.1647    0.9061    0.3220
Pt    0.1678    0.9049    0.3625
Pt    0.1659    0.9474    0.2766
Pt    0.1663    0.9508    0.3185
Pt    0.1676    0.9508    0.3632
Pt    0.1694    0.9934    0.3603
Pt    0.2069    0.7758    0.2747
Pt    0.2105    0.7770    0.3188
Pt    0.2113    0.7761    0.3640
Pt    0.2080    0.8190    0.2759
Pt    0.2108    0.8207    0.3184
Pt    0.2102    0.8204    0.3627
Pt    0.2085    0.8625    0.2761
Pt    0.2088    0.8621    0.3202
Pt    0.2093    0.8627    0.3615
Pt    0.2102    0.9057    0.2765
Pt    0.2081    0.9064    0.3187
Pt    0.2104    0.9043    0.3624
Pt    0.2121    0.9502    0.2763
Pt    0.2065    0.9511    0.3199
Pt    0.2109    0.9510    0.3650
Pt    0.2084    0.9908    0.3212
Pt    0.2532    0.7761    0.2748
Pt    0.2500    0.7735    0.3169
Pt    0.2541    0.7757    0.3624
Pt    0.2527    0.8205    0.2747
Pt    0.2347    0.8638    0.3861
Pt    0.1469    0.0131    0.3622
Pt    0.0163    0.7960    0.2757
Pt    0.0978    0.8165    0.3875
Pt    0.0164    0.9915    0.2933
Pt    0.0160    0.9486    0.3373
Pt    0.2337    0.0132    0.2787
Pt    0.0159    0.9503    0.3815
Pt    0.1269    0.0128    0.3413
Pt    0.0152    0.9927    0.3382
Pt    0.0164    0.0140    0.2761
Pt    0.0180    0.7751    0.5145
Pt    0.1034    0.9484    0.5145
Pt    0.2572    0.9086    0.4098
Pt    0.2542    0.8634    0.4505
Pt    0.2547    0.8629    0.4073
Pt    0.2540    0.8195    0.4504
Pt    0.2553    0.8202    0.4093
Pt    0.2499    0.7762    0.4947
Pt    0.2560    0.7779    0.4533
Pt    0.2534    0.7741    0.4084
Pt    0.2167    0.9913    0.4930
Pt    0.2154    0.9915    0.4498
Pt    0.2139    0.9494    0.4921
Pt    0.0590    0.7945    0.4911
Pt    0.0586    0.8438    0.4070
Pt    0.0581    0.8392    0.4471
Pt    0.0583    0.8380    0.4925
Pt    0.0557    0.8835    0.4044
Pt    0.0576    0.8828    0.4494
Pt    0.0594    0.8839    0.4924
Pt    0.0600    0.9287    0.4055
Pt    0.0596    0.9287    0.4494
Pt    0.0597    0.9247    0.4934
Pt    0.0579    0.9699    0.4031
Pt    0.0603    0.9706    0.4493
Pt    0.0607    0.9698    0.4929
Pt    0.1011    0.7987    0.4090
Pt    0.0999    0.8397    0.4079
Pt    0.1030    0.8365    0.4515
Pt    0.1046    0.8390    0.4940
Pt    0.1014    0.8834    0.4064
Pt    0.1033    0.8840    0.4512
Pt    0.1058    0.8835    0.4928
Pt    0.1010    0.9287    0.4056
Pt    0.1036    0.9284    0.4487
Pt    0.1040    0.9288    0.4934
Pt    0.1014    0.9727    0.4064
Pt    0.1034    0.9719    0.4500
Pt    0.1040    0.9711    0.4918
Pt    0.1432    0.7959    0.4081
Pt    0.1443    0.8409    0.4089
Pt    0.1448    0.8372    0.4512
Pt    0.1448    0.8846    0.4080
Pt    0.1468    0.8833    0.4499
Pt    0.1484    0.8847    0.4932
Pt    0.1458    0.9282    0.4042
Pt    0.1494    0.9301    0.4507
Pt    0.1503    0.9292    0.4926
Pt    0.1476    0.9721    0.4029
Pt    0.1491    0.9725    0.4477
Pt    0.1497    0.9707    0.4925
Pt    0.1872    0.7982    0.4074
Pt    0.1887    0.7987    0.4492
Pt    0.1871    0.8401    0.4062
Pt    0.1905    0.8403    0.4516
Pt    0.1907    0.8849    0.4080
Pt    0.1893    0.8850    0.4495
Pt    0.1911    0.9274    0.4055
Pt    0.1963    0.9287    0.4493
Pt    0.1909    0.9271    0.4910
Pt    0.1921    0.9721    0.4046
Pt    0.1934    0.9717    0.4455
Pt    0.1929    0.9718    0.4915
Pt    0.2315    0.7967    0.4083
Pt    0.2345    0.7965    0.4505
Pt    0.2306    0.7981    0.4963
Pt    0.2335    0.8404    0.4094
Pt    0.2323    0.8414    0.4502
Pt    0.2368    0.8865    0.4079
Pt    0.2348    0.9263    0.4069
Pt    0.2427    0.9705    0.4920
Pt    0.2133    0.9051    0.4084
Pt    0.2123    0.8635    0.4513
Pt    0.2126    0.8622    0.4071
Pt    0.2120    0.8219    0.4941
Pt    0.2106    0.8195    0.4515
Pt    0.2106    0.8201    0.4076
Pt    0.2093    0.7747    0.4508
Pt    0.2106    0.7771    0.4072
Pt    0.1715    0.9934    0.4903
Pt    0.1723    0.9942    0.4459
Pt    0.1674    0.9939    0.4040
Pt    0.1711    0.9510    0.4922
Pt    0.1730    0.9491    0.4484
Pt    0.1675    0.9499    0.4035
Pt    0.1712    0.9057    0.4921
Pt    0.0597    0.8178    0.4692
Pt    0.2165    0.0142    0.4694
Pt    0.0578    0.8636    0.4284
Pt    0.0584    0.8622    0.4703
Pt    0.1909    0.0134    0.4022
Pt    0.0598    0.9070    0.4276
Pt    0.0598    0.9047    0.4703
Pt    0.0152    0.9930    0.4248
Pt    0.0600    0.9482    0.4258
Pt    0.0589    0.9497    0.4727
Pt    0.0808    0.8818    0.5146
Pt    0.0590    0.9911    0.4272
Pt    0.0612    0.9929    0.4708
Pt    0.1254    0.0139    0.4723
Pt    0.1023    0.8611    0.4303
Pt    0.1045    0.8602    0.4729
Pt    0.1934    0.0125    0.4934
Pt    0.1034    0.9047    0.4259
Pt    0.1049    0.9062    0.4716
Pt    0.1510    0.9908    0.5143
Pt    0.1049    0.9493    0.4264
Pt    0.1041    0.9499    0.4705
Pt    0.1715    0.9085    0.4495
Pt    0.1056    0.9916    0.4292
Pt    0.1040    0.9924    0.4712
Pt    0.1697    0.9070    0.4067
Pt    0.1456    0.7775    0.4314
Pt    0.1439    0.8178    0.4287
Pt    0.1457    0.8630    0.4280
Pt    0.1484    0.8623    0.4726
Pt    0.0607    0.0142    0.4925
Pt    0.1480    0.9088    0.4277
Pt    0.1486    0.9083    0.4706
Pt    0.1685    0.8631    0.4915
Pt    0.1473    0.9480    0.4272
Pt    0.1485    0.9502    0.4701
Pt    0.1698    0.8622    0.4513
Pt    0.1475    0.9946    0.4261
Pt    0.1504    0.9933    0.4704
Pt    0.1668    0.8623    0.4078
Pt    0.1883    0.7756    0.4294
Pt    0.1877    0.7772    0.4718
Pt    0.1894    0.8224    0.4295
Pt    0.1903    0.8219    0.4732
Pt    0.1897    0.8624    0.4286
Pt    0.1928    0.8645    0.4725
Pt    0.1901    0.9066    0.4286
Pt    0.1946    0.9068    0.4700
Pt    0.1675    0.8183    0.4535
Pt    0.1932    0.9515    0.4252
Pt    0.1943    0.9513    0.4685
Pt    0.1652    0.8181    0.4087
Pt    0.1930    0.9932    0.4248
Pt    0.1937    0.9920    0.4705
Pt    0.1680    0.7743    0.4502
Pt    0.2320    0.7748    0.4297
Pt    0.2302    0.7789    0.4728
Pt    0.0829    0.9919    0.4922
Pt    0.2333    0.8171    0.4293
Pt    0.2315    0.8199    0.4720
Pt    0.2346    0.8640    0.4306
Pt    0.2344    0.9085    0.4289
Pt    0.2394    0.9944    0.4693
Pt    0.0368    0.0130    0.4264
Pt    0.0369    0.7972    0.4700
Pt    0.0823    0.9933    0.4490
Pt    0.0367    0.8390    0.4245
Pt    0.0389    0.8388    0.4694
Pt    0.1664    0.7750    0.4080
Pt    0.0345    0.8857    0.4282
Pt    0.0379    0.8822    0.4710
Pt    0.1282    0.9930    0.4945
Pt    0.0382    0.9273    0.4290
Pt    0.0370    0.9283    0.4734
Pt    0.1283    0.9932    0.4481
Pt    0.0375    0.9721    0.4255
Pt    0.0354    0.9698    0.4706
Pt    0.1250    0.9924    0.4062
Pt    0.0802    0.8377    0.4294
Pt    0.0814    0.8386    0.4727
Pt    0.1274    0.9497    0.4914
Pt    0.0824    0.8837    0.4305
Pt    0.0832    0.8817    0.4714
Pt    0.1263    0.9499    0.4491
Pt    0.0817    0.9273    0.4267
Pt    0.0821    0.9287    0.4698
Pt    0.1248    0.9507    0.4035
Pt    0.0814    0.9705    0.4280
Pt    0.0807    0.9698    0.4699
Pt    0.1250    0.9057    0.4928
Pt    0.1224    0.8002    0.4325
Pt    0.1235    0.8397    0.4285
Pt    0.1249    0.8404    0.4733
Pt    0.1247    0.9063    0.4490
Pt    0.1246    0.8835    0.4290
Pt    0.1257    0.8847    0.4718
Pt    0.1250    0.9060    0.4061
Pt    0.1227    0.9276    0.4259
Pt    0.1258    0.9275    0.4724
Pt    0.1256    0.8600    0.4952
Pt    0.1264    0.9711    0.4274
Pt    0.1262    0.9714    0.4722
Pt    0.1253    0.8607    0.4501
Pt    0.1649    0.7983    0.4309
Pt    0.1666    0.8403    0.4316
Pt    0.1667    0.8398    0.4746
Pt    0.1681    0.8848    0.4294
Pt    0.1694    0.8851    0.4711
Pt    0.1486    0.9059    0.5132
Pt    0.1715    0.9306    0.4264
Pt    0.1718    0.9292    0.4709
Pt    0.1204    0.8619    0.4061
Pt    0.1695    0.9698    0.4268
Pt    0.1705    0.9726    0.4692
Pt    0.1235    0.8169    0.4076
Pt    0.2096    0.7975    0.4283
Pt    0.2088    0.7986    0.4745
Pt    0.2123    0.8425    0.4287
Pt    0.2122    0.8424    0.4734
Pt    0.2139    0.8865    0.4301
Pt    0.2162    0.9698    0.4706
Pt    0.1220    0.7747    0.4097
Pt    0.2561    0.7981    0.4286
Pt    0.2532    0.7995    0.4749
Pt    0.0366    0.9710    0.5146
Pt    0.2574    0.8433    0.4311
Pt    0.2520    0.8397    0.4721
Pt    0.2574    0.8858    0.4293
Pt    0.0381    0.7744    0.4917
Pt    0.0368    0.8165    0.4492
Pt    0.0359    0.8181    0.4913
Pt    0.0339    0.8601    0.4044
Pt    0.0365    0.8596    0.4489
Pt    0.0379    0.8585    0.4905
Pt    0.0367    0.9061    0.4068
Pt    0.0370    0.9068    0.4508
Pt    0.0362    0.9035    0.4914
Pt    0.0366    0.9489    0.4065
Pt    0.0379    0.9474    0.4509
Pt    0.0373    0.9487    0.4944
Pt    0.0362    0.9936    0.4032
Pt    0.0372    0.9934    0.4470
Pt    0.0369    0.9913    0.4929
Pt    0.0795    0.8162    0.4905
Pt    0.0802    0.8646    0.4075
Pt    0.0802    0.8596    0.4501
Pt    0.0812    0.8601    0.4937
Pt    0.0809    0.9053    0.4056
Pt    0.0830    0.9066    0.4498
Pt    0.0823    0.9048    0.4910
Pt    0.0826    0.9510    0.4040
Pt    0.0832    0.9502    0.4481
Pt    0.0809    0.9489    0.4913
Pt    0.0816    0.9947    0.4056
Pt    0.0165    0.9247    0.4938
Pt    0.0165    0.8387    0.4470
Pt    0.0155    0.8599    0.4702
Pt    0.1276    0.9286    0.5140
Pt    0.1716    0.0137    0.4693
Pt    0.0592    0.0138    0.4059
Pt    0.0597    0.8167    0.5125
Pt    0.1900    0.9036    0.5138
Pt    0.1935    0.9465    0.5131
Pt    0.1023    0.0134    0.4928
Pt    0.0582    0.8613    0.5128
Pt    0.0160    0.8808    0.4916
Pt    0.2602    0.9958    0.4969
Pt    0.0366    0.8827    0.5126
Pt    0.0591    0.9930    0.5136
Pt    0.1280    0.0136    0.5142
Pt    0.1025    0.9054    0.5136
Pt    0.1705    0.8818    0.5142
Pt    0.0161    0.9500    0.4264
Pt    0.1263    0.9704    0.5129
Pt    0.1266    0.8842    0.5146
Pt    0.0801    0.8386    0.5140
Pt    0.1695    0.9261    0.5131
Pt    0.0391    0.7963    0.5129
Pt    0.1473    0.8596    0.5148
Pt    0.2365    0.9904    0.5137
Pt    0.0815    0.9269    0.5130
Pt    0.1489    0.9493    0.5142
Pt    0.0373    0.9239    0.5146
Pt    0.0168    0.0128    0.5804
Pt    0.0397    0.7742    0.5345
Pt    0.0392    0.0135    0.5604
Pt    0.0156    0.9930    0.5155
Pt    0.0599    0.0130    0.6275
Pt    0.0170    0.7947    0.5371
Pt    0.0174    0.8610    0.5577
Pt    0.0158    0.9464    0.5151
Pt    0.0163    0.8823    0.5798
Pt    0.0152    0.9717    0.5791
Pt    0.2149    0.9696    0.5159
Pt    0.0158    0.8386    0.5350
Pt    0.2147    0.0116    0.5153
Pt    0.0600    0.7956    0.5346
Pt    0.0613    0.7976    0.5802
Pt    0.0595    0.8386    0.5362
Pt    0.0582    0.8384    0.5819
Pt    0.0595    0.8391    0.6206
Pt    0.0595    0.8818    0.5348
Pt    0.0568    0.8834    0.5807
Pt    0.0580    0.8830    0.6231
Pt    0.0598    0.9265    0.5365
Pt    0.0597    0.9255    0.5814
Pt    0.0594    0.9279    0.6247
Pt    0.0599    0.9713    0.5354
Pt    0.0610    0.9708    0.5799
Pt    0.0581    0.9724    0.6238
Pt    0.1025    0.7964    0.6203
Pt    0.1032    0.8399    0.5366
Pt    0.1021    0.8395    0.5784
Pt    0.1017    0.8421    0.6250
Pt    0.1040    0.8853    0.5357
Pt    0.1015    0.8813    0.5804
Pt    0.1007    0.8836    0.6220
Pt    0.1032    0.9250    0.5352
Pt    0.1036    0.9256    0.5791
Pt    0.1052    0.9278    0.6246
Pt    0.1054    0.9692    0.5368
Pt    0.1038    0.9702    0.5780
Pt    0.1041    0.9706    0.6248
Pt    0.1434    0.7974    0.6223
Pt    0.1455    0.8404    0.5803
Pt    0.1463    0.8427    0.6228
Pt    0.1487    0.8833    0.5345
Pt    0.1468    0.8839    0.5785
Pt    0.1454    0.8851    0.6234
Pt    0.1491    0.9264    0.5364
Pt    0.1478    0.9262    0.5814
Pt    0.1470    0.9270    0.6240
Pt    0.1482    0.9680    0.5373
Pt    0.1490    0.9711    0.5797
Pt    0.1498    0.9718    0.6238
Pt    0.1877    0.7972    0.5802
Pt    0.1849    0.7963    0.6217
Pt    0.1897    0.8405    0.5781
Pt    0.1905    0.8401    0.6221
Pt    0.1928    0.8805    0.5793
Pt    0.1903    0.8849    0.6222
Pt    0.1890    0.9262    0.5369
Pt    0.1932    0.9251    0.5794
Pt    0.1926    0.9308    0.6246
Pt    0.1913    0.9707    0.5380
Pt    0.1945    0.9739    0.5805
Pt    0.1915    0.9718    0.6234
Pt    0.2318    0.7965    0.5356
Pt    0.2301    0.7990    0.5763
Pt    0.2318    0.7957    0.6218
Pt    0.2340    0.8387    0.5783
Pt    0.2299    0.8394    0.6220
Pt    0.2313    0.8832    0.6222
Pt    0.2340    0.9248    0.6233
Pt    0.2388    0.9662    0.5345
Pt    0.2351    0.9691    0.5793
Pt    0.2564    0.9044    0.6218
Pt    0.2599    0.9725    0.5161
Pt    0.0841    0.9693    0.5155
Pt    0.2534    0.8597    0.6226
Pt    0.0152    0.8834    0.6241
Pt    0.2534    0.8182    0.6208
Pt    0.1056    0.9911    0.5164
Pt    0.0596    0.9483    0.5154
Pt    0.2552    0.8189    0.5782
Pt    0.0584    0.8183    0.5599
Pt    0.0569    0.8163    0.6029
Pt    0.0600    0.8600    0.5575
Pt    0.0579    0.8610    0.6025
Pt    0.0615    0.9054    0.5585
Pt    0.0568    0.9058    0.6023
Pt    0.0592    0.9491    0.5600
Pt    0.0589    0.9489    0.6021
Pt    0.0606    0.9920    0.5579
Pt    0.0599    0.9925    0.6007
Pt    0.1022    0.8196    0.5585
Pt    0.1021    0.8196    0.6015
Pt    0.1025    0.8639    0.5558
Pt    0.1019    0.8596    0.6016
Pt    0.1013    0.9050    0.5594
Pt    0.1035    0.9057    0.6005
Pt    0.1051    0.9479    0.5568
Pt    0.1033    0.9478    0.5994
Pt    0.1037    0.9932    0.5559
Pt    0.1037    0.9912    0.6033
Pt    0.1424    0.7740    0.5961
Pt    0.1465    0.8207    0.6014
Pt    0.1473    0.8605    0.5576
Pt    0.1473    0.8630    0.6004
Pt    0.1481    0.9048    0.5574
Pt    0.1492    0.9047    0.6006
Pt    0.1486    0.9483    0.5582
Pt    0.1475    0.9496    0.6014
Pt    0.1505    0.9929    0.5586
Pt    0.1499    0.9943    0.6020
Pt    0.1897    0.7748    0.5992
Pt    0.1892    0.8196    0.5995
Pt    0.1891    0.8609    0.6000
Pt    0.1917    0.9026    0.5544
Pt    0.1909    0.9051    0.6020
Pt    0.1938    0.9496    0.5598
Pt    0.1924    0.9498    0.6027
Pt    0.1943    0.9931    0.5591
Pt    0.1963    0.9956    0.6051
Pt    0.2325    0.7752    0.5559
Pt    0.2310    0.7750    0.5990
Pt    0.2335    0.8168    0.6008
Pt    0.2325    0.8619    0.5994
Pt    0.2355    0.9072    0.5984
Pt    0.2325    0.9463    0.5608
Pt    0.2386    0.9890    0.5578
Pt    0.0407    0.7944    0.5574
Pt    0.0372    0.8389    0.5585
Pt    0.0361    0.8399    0.6010
Pt    0.0393    0.8825    0.5575
Pt    0.0368    0.8829    0.6021
Pt    0.0392    0.9260    0.5592
Pt    0.0364    0.9270    0.6025
Pt    0.0367    0.9698    0.5567
Pt    0.0373    0.9710    0.6035
Pt    0.0798    0.7984    0.5576
Pt    0.0800    0.8395    0.5597
Pt    0.0807    0.8396    0.6026
Pt    0.0807    0.8827    0.5583
Pt    0.0784    0.8830    0.6016
Pt    0.0819    0.9286    0.5582
Pt    0.0811    0.9287    0.6034
Pt    0.0811    0.9707    0.5564
Pt    0.0834    0.9701    0.6029
Pt    0.1246    0.7983    0.6010
Pt    0.1238    0.8402    0.5568
Pt    0.1234    0.8407    0.6018
Pt    0.1254    0.8834    0.5594
Pt    0.1258    0.8843    0.6006
Pt    0.1273    0.9272    0.5545
Pt    0.1252    0.9267    0.6021
Pt    0.1270    0.9708    0.5591
Pt    0.1274    0.9699    0.5999
Pt    0.1646    0.7925    0.5971
Pt    0.1687    0.8397    0.5997
Pt    0.1692    0.8811    0.5544
Pt    0.1717    0.8819    0.5995
Pt    0.1695    0.9259    0.5601
Pt    0.1710    0.9265    0.6015
Pt    0.1711    0.9720    0.5591
Pt    0.1734    0.9708    0.6016
Pt    0.2106    0.7968    0.6015
Pt    0.2113    0.8390    0.5975
Pt    0.2156    0.8870    0.5977
Pt    0.2134    0.9256    0.5567
Pt    0.2138    0.9265    0.6022
Pt    0.2144    0.9700    0.5571
Pt    0.2156    0.9719    0.6013
Pt    0.2524    0.7972    0.5570
Pt    0.2534    0.7937    0.5986
Pt    0.2548    0.8388    0.5996
Pt    0.2537    0.8846    0.5996
Pt    0.2622    0.0084    0.5540
Pt    0.0383    0.8160    0.5373
Pt    0.0340    0.8155    0.5804
Pt    0.0366    0.8618    0.5347
Pt    0.0371    0.8608    0.5807
Pt    0.0361    0.8592    0.6249
Pt    0.0383    0.9047    0.5371
Pt    0.0365    0.9052    0.5793
Pt    0.0345    0.9045    0.6242
Pt    0.0388    0.9481    0.5359
Pt    0.0370    0.9502    0.5806
Pt    0.0376    0.9485    0.6248
Pt    0.0381    0.9940    0.5371
Pt    0.0361    0.9910    0.5805
Pt    0.0374    0.9954    0.6233
Pt    0.0811    0.8170    0.5350
Pt    0.0819    0.8170    0.5808
Pt    0.0791    0.8172    0.6230
Pt    0.0806    0.8599    0.5365
Pt    0.0809    0.8614    0.5800
Pt    0.0790    0.8621    0.6248
Pt    0.0805    0.9048    0.5360
Pt    0.0811    0.9038    0.5799
Pt    0.0804    0.9058    0.6221
Pt    0.0811    0.9489    0.5360
Pt    0.0808    0.9494    0.5790
Pt    0.0810    0.9491    0.6259
Pt    0.0808    0.9931    0.5355
Pt    0.0838    0.9921    0.5783
Pt    0.0814    0.9915    0.6243
Pt    0.1225    0.7761    0.6212
Pt    0.1242    0.8190    0.5792
Pt    0.1238    0.8190    0.6227
Pt    0.1244    0.8615    0.5373
Pt    0.1239    0.8598    0.5785
Pt    0.1248    0.8643    0.6214
Pt    0.1260    0.9054    0.5355
Pt    0.1252    0.9054    0.5792
Pt    0.1237    0.9049    0.6237
Pt    0.1267    0.9499    0.5366
Pt    0.1262    0.9459    0.5780
Pt    0.1262    0.9487    0.6242
Pt    0.1286    0.9909    0.5355
Pt    0.1255    0.9914    0.5787
Pt    0.1280    0.9919    0.6230
Pt    0.1626    0.7751    0.6199
Pt    0.1652    0.8197    0.6229
Pt    0.1692    0.8617    0.5766
Pt    0.1677    0.8620    0.6226
Pt    0.1684    0.9040    0.5347
Pt    0.1702    0.9029    0.5776
Pt    0.1668    0.9064    0.6239
Pt    0.1719    0.9480    0.5377
Pt    0.1703    0.9488    0.5801
Pt    0.1700    0.9498    0.6234
Pt    0.1719    0.9916    0.5354
Pt    0.1725    0.9930    0.5809
Pt    0.1723    0.9924    0.6258
Pt    0.2100    0.7779    0.5748
Pt    0.2091    0.7743    0.6217
Pt    0.2074    0.8199    0.5739
Pt    0.2082    0.8168    0.6211
Pt    0.2109    0.8611    0.6215
Pt    0.2163    0.9049    0.5764
Pt    0.2125    0.9071    0.6247
Pt    0.2145    0.9466    0.5360
Pt    0.2127    0.9489    0.5807
Pt    0.2150    0.9501    0.6226
Pt    0.2153    0.9910    0.5366
Pt    0.2180    0.9944    0.5812
Pt    0.2533    0.7752    0.5357
Pt    0.2530    0.7751    0.5770
Pt    0.2548    0.7763    0.6211
Pt    0.2628    0.9796    0.5442
Pt    0.0176    0.8375    0.6236
Pt    0.1234    0.8404    0.5171
Pt    0.1488    0.0127    0.5352
Pt    0.0152    0.9267    0.5374
Pt    0.2309    0.7754    0.5154
Pt    0.2383    0.0108    0.5351
Pt    0.1259    0.0124    0.5562
Pt    0.0591    0.9039    0.5151
Pt    0.2530    0.7988    0.5149
Pt    0.0158    0.9265    0.5795
Pt    0.0378    0.0142    0.6014
Pt    0.1046    0.0126    0.5806
Pt    0.1958    0.0131    0.5814
Pt    0.0162    0.9484    0.5572
Pt    0.2646    0.0024    0.5240
Pt    0.1718    0.9685    0.5162
Pt    0.2172    0.0124    0.5579
Pt    0.0168    0.9923    0.5570
Pt    0.0387    0.8391    0.5153
Pt    0.0158    0.9493    0.6038
Pt    0.1932    0.9903    0.5151
Pt    0.1033    0.8640    0.5153
Pt    0.0156    0.8159    0.5149
Pt    0.2509    0.9937    0.7544
Pt    0.2551    0.9529    0.7535
Pt    0.2526    0.8168    0.7093
Pt    0.2544    0.8177    0.6669
Pt    0.2524    0.7732    0.7563
Pt    0.0557    0.8000    0.7550
Pt    0.0577    0.8851    0.6684
Pt    0.0594    0.9268    0.6702
Pt    0.0609    0.9275    0.7109
Pt    0.0610    0.9714    0.6677
Pt    0.0622    0.9725    0.7108
Pt    0.0983    0.7974    0.6670
Pt    0.1001    0.7979    0.7117
Pt    0.0994    0.7986    0.7564
Pt    0.1001    0.8381    0.6685
Pt    0.0995    0.8432    0.7122
Pt    0.1001    0.8414    0.7554
Pt    0.1017    0.8829    0.6653
Pt    0.1011    0.8836    0.7118
Pt    0.1014    0.8861    0.7525
Pt    0.1036    0.9258    0.6690
Pt    0.1036    0.9291    0.7112
Pt    0.1047    0.9729    0.6676
Pt    0.1020    0.9718    0.7099
Pt    0.1447    0.7947    0.6701
Pt    0.1446    0.7970    0.7122
Pt    0.1440    0.7963    0.7554
Pt    0.1419    0.8392    0.6677
Pt    0.1453    0.8390    0.7108
Pt    0.1450    0.8400    0.7554
Pt    0.1447    0.8837    0.6673
Pt    0.1452    0.8853    0.7127
Pt    0.1441    0.8867    0.7524
Pt    0.1463    0.9271    0.6670
Pt    0.1453    0.9319    0.7140
Pt    0.1458    0.9307    0.7536
Pt    0.1494    0.9713    0.6693
Pt    0.1877    0.7984    0.6648
Pt    0.1913    0.7967    0.7092
Pt    0.1876    0.7975    0.7550
Pt    0.1878    0.8394    0.6662
Pt    0.1896    0.8431    0.7109
Pt    0.1861    0.8417    0.7554
Pt    0.1875    0.8828    0.6664
Pt    0.1902    0.8835    0.7086
Pt    0.1893    0.8850    0.7544
Pt    0.1904    0.9284    0.6660
Pt    0.1910    0.9274    0.7100
Pt    0.1856    0.9311    0.7552
Pt    0.2318    0.7960    0.6652
Pt    0.2315    0.7962    0.7119
Pt    0.2317    0.7962    0.7559
Pt    0.2319    0.8393    0.6649
Pt    0.2317    0.8398    0.7121
Pt    0.2319    0.8408    0.7545
Pt    0.2319    0.8831    0.6670
Pt    0.2320    0.8850    0.7095
Pt    0.2286    0.8835    0.7530
Pt    0.2334    0.9269    0.6653
Pt    0.2331    0.9298    0.7084
Pt    0.2327    0.9320    0.7543
Pt    0.2285    0.9739    0.7548
Pt    0.2530    0.9512    0.7106
Pt    0.2536    0.9072    0.7537
Pt    0.2532    0.8614    0.7104
Pt    0.0370    0.9911    0.7544
Pt    0.2538    0.8625    0.6655
Pt    0.2548    0.7979    0.6455
Pt    0.2542    0.9047    0.6673
Pt    0.2536    0.8622    0.7513
Pt    0.2545    0.9080    0.7090
Pt    0.0575    0.7766    0.7325
Pt    0.0578    0.8591    0.6476
Pt    0.0569    0.9051    0.6456
Pt    0.0600    0.9062    0.6908
Pt    0.0581    0.9491    0.6464
Pt    0.0595    0.9496    0.6896
Pt    0.0621    0.9497    0.7311
Pt    0.0581    0.9913    0.6464
Pt    0.0609    0.9928    0.6895
Pt    0.0588    0.9938    0.7317
Pt    0.1001    0.7771    0.6438
Pt    0.0987    0.7780    0.6900
Pt    0.0989    0.7767    0.7327
Pt    0.1031    0.8189    0.6436
Pt    0.0982    0.8186    0.6896
Pt    0.0988    0.8198    0.7338
Pt    0.1005    0.8626    0.6450
Pt    0.1018    0.8620    0.6902
Pt    0.1018    0.8632    0.7345
Pt    0.1016    0.9040    0.6445
Pt    0.1027    0.9055    0.6915
Pt    0.1021    0.9075    0.7323
Pt    0.1039    0.9487    0.6474
Pt    0.1058    0.9500    0.6895
Pt    0.1053    0.9925    0.6442
Pt    0.1049    0.9937    0.6933
Pt    0.1449    0.7765    0.6437
Pt    0.1426    0.7747    0.6900
Pt    0.1460    0.7751    0.7338
Pt    0.1437    0.8175    0.6453
Pt    0.1434    0.8157    0.6894
Pt    0.1440    0.8191    0.7343
Pt    0.1444    0.8638    0.6432
Pt    0.1449    0.8610    0.6902
Pt    0.1459    0.8621    0.7327
Pt    0.1459    0.9068    0.6461
Pt    0.1448    0.9069    0.6904
Pt    0.1446    0.9086    0.7338
Pt    0.1476    0.9496    0.6463
Pt    0.1488    0.9509    0.6902
Pt    0.1499    0.9934    0.6462
Pt    0.1874    0.7747    0.6430
Pt    0.1903    0.7739    0.6881
Pt    0.1877    0.7748    0.7328
Pt    0.1880    0.8176    0.6431
Pt    0.1888    0.8190    0.6894
Pt    0.1862    0.8188    0.7316
Pt    0.1881    0.8613    0.6444
Pt    0.1902    0.8615    0.6872
Pt    0.1881    0.8636    0.7314
Pt    0.1900    0.9051    0.6437
Pt    0.1900    0.9061    0.6892
Pt    0.1876    0.9082    0.7328
Pt    0.1927    0.9513    0.6470
Pt    0.1908    0.9481    0.6888
Pt    0.1884    0.9490    0.7298
Pt    0.2309    0.7758    0.6432
Pt    0.2315    0.7737    0.6892
Pt    0.2327    0.7755    0.7342
Pt    0.2330    0.8174    0.6417
Pt    0.2310    0.8167    0.6889
Pt    0.2318    0.8175    0.7336
Pt    0.2292    0.8634    0.6453
Pt    0.2308    0.8613    0.6873
Pt    0.2322    0.8635    0.7316
Pt    0.2334    0.9050    0.6435
Pt    0.2326    0.9068    0.6878
Pt    0.2321    0.9067    0.7305
Pt    0.2334    0.9487    0.6876
Pt    0.2318    0.9552    0.7317
Pt    0.2304    0.9915    0.7323
Pt    0.0362    0.7960    0.7326
Pt    0.0371    0.8831    0.6469
Pt    0.0365    0.9265    0.6456
Pt    0.0381    0.9259    0.6916
Pt    0.0374    0.9699    0.6469
Pt    0.0387    0.9709    0.6905
Pt    0.0409    0.9698    0.7325
Pt    0.0752    0.7995    0.6890
Pt    0.0776    0.7996    0.7322
Pt    0.0791    0.8377    0.6450
Pt    0.0794    0.8406    0.6889
Pt    0.0783    0.8416    0.7347
Pt    0.0793    0.8839    0.6452
Pt    0.0823    0.8820    0.6881
Pt    0.0810    0.9260    0.6462
Pt    0.0829    0.9286    0.6889
Pt    0.0811    0.9712    0.6459
Pt    0.0826    0.9720    0.6892
Pt    0.0843    0.9719    0.7331
Pt    0.1232    0.7960    0.6449
Pt    0.1210    0.7985    0.6905
Pt    0.1224    0.7975    0.7338
Pt    0.1240    0.8407    0.6439
Pt    0.1215    0.8396    0.6902
Pt    0.1224    0.8414    0.7319
Pt    0.1239    0.8848    0.6442
Pt    0.1232    0.8837    0.6893
Pt    0.1229    0.8863    0.7331
Pt    0.1253    0.9293    0.6468
Pt    0.1259    0.9295    0.6894
Pt    0.1221    0.9318    0.7343
Pt    0.1281    0.9705    0.6430
Pt    0.1270    0.9725    0.6890
Pt    0.1645    0.7965    0.6451
Pt    0.1698    0.7937    0.6886
Pt    0.1651    0.7971    0.7341
Pt    0.1659    0.8391    0.6450
Pt    0.1663    0.8410    0.6893
Pt    0.1649    0.8390    0.7328
Pt    0.1678    0.8853    0.6439
Pt    0.1672    0.8841    0.6903
Pt    0.1678    0.8874    0.7328
Pt    0.1693    0.9278    0.6445
Pt    0.1698    0.9265    0.6875
Pt    0.1672    0.9289    0.7314
Pt    0.1717    0.9709    0.6474
Pt    0.2094    0.7968    0.6444
Pt    0.2110    0.7968    0.6874
Pt    0.2090    0.7962    0.7344
Pt    0.2090    0.8397    0.6428
Pt    0.2100    0.8384    0.6876
Pt    0.2090    0.8409    0.7353
Pt    0.2091    0.8838    0.6446
Pt    0.2110    0.8842    0.6871
Pt    0.2085    0.8850    0.7302
Pt    0.2122    0.9273    0.6449
Pt    0.2106    0.9283    0.6858
Pt    0.2128    0.9309    0.7313
Pt    0.0367    0.0139    0.6456
Pt    0.2536    0.7960    0.6859
Pt    0.2532    0.7960    0.7335
Pt    0.2527    0.8408    0.6446
Pt    0.2533    0.8412    0.6874
Pt    0.2537    0.8405    0.7325
Pt    0.2566    0.8842    0.6426
Pt    0.2536    0.8843    0.6885
Pt    0.2554    0.8846    0.7319
Pt    0.1719    0.0131    0.6469
Pt    0.2546    0.9279    0.6878
Pt    0.2523    0.9299    0.7317
Pt    0.2552    0.9753    0.7303
Pt    0.0349    0.7763    0.7525
Pt    0.0371    0.9059    0.6663
Pt    0.0373    0.9489    0.6710
Pt    0.0406    0.9492    0.7119
Pt    0.0385    0.9918    0.6689
Pt    0.0375    0.9921    0.7123
Pt    0.2546    0.8181    0.7530
Pt    0.0761    0.7774    0.7098
Pt    0.0775    0.7792    0.7542
Pt    0.0770    0.8205    0.7091
Pt    0.0774    0.8198    0.7550
Pt    0.0803    0.8610    0.6673
Pt    0.0810    0.9048    0.6668
Pt    0.0826    0.9063    0.7113
Pt    0.0823    0.9479    0.6694
Pt    0.0826    0.9494    0.7111
Pt    0.0840    0.9925    0.6680
Pt    0.0835    0.9952    0.7141
Pt    0.1205    0.7756    0.6681
Pt    0.1223    0.7770    0.7109
Pt    0.1217    0.7744    0.7552
Pt    0.1235    0.8176    0.6662
Pt    0.1225    0.8202    0.7128
Pt    0.1220    0.8204    0.7556
Pt    0.1203    0.8603    0.6679
Pt    0.1231    0.8632    0.7110
Pt    0.1219    0.8654    0.7537
Pt    0.1236    0.9045    0.6679
Pt    0.1260    0.9099    0.7119
Pt    0.1247    0.9092    0.7545
Pt    0.1275    0.9507    0.6674
Pt    0.1233    0.9541    0.7128
Pt    0.1287    0.9905    0.6676
Pt    0.1673    0.7747    0.6651
Pt    0.1661    0.7761    0.7121
Pt    0.1642    0.7746    0.7555
Pt    0.1644    0.8179    0.6688
Pt    0.1670    0.8187    0.7093
Pt    0.1651    0.8189    0.7571
Pt    0.1638    0.8611    0.6667
Pt    0.1670    0.8623    0.7115
Pt    0.1662    0.8649    0.7528
Pt    0.1666    0.9032    0.6677
Pt    0.1678    0.9066    0.7102
Pt    0.1665    0.9071    0.7549
Pt    0.1683    0.9500    0.6674
Pt    0.2105    0.7756    0.6664
Pt    0.2119    0.7757    0.7129
Pt    0.2082    0.7750    0.7545
Pt    0.2092    0.8166    0.6661
Pt    0.2103    0.8182    0.7121
Pt    0.2095    0.8192    0.7537
Pt    0.2097    0.8596    0.6653
Pt    0.2112    0.8613    0.7089
Pt    0.2093    0.8621    0.7552
Pt    0.2107    0.9053    0.6667
Pt    0.2114    0.9067    0.7101
Pt    0.2093    0.9112    0.7521
Pt    0.2122    0.9503    0.7091
Pt    0.2095    0.9518    0.7514
Pt    0.2547    0.7748    0.6662
Pt    0.2542    0.7737    0.7093
Pt    0.2543    0.9258    0.6438
Pt    0.0598    0.0137    0.6683
Pt    0.0165    0.0138    0.7550
Pt    0.0162    0.0123    0.6667
Pt    0.0165    0.9913    0.6455
Pt    0.0172    0.9925    0.6909
Pt    0.0175    0.8823    0.6692
Pt    0.0166    0.9706    0.6696
Pt    0.0162    0.9075    0.6905
Pt    0.0169    0.9905    0.7342
Pt    0.1041    0.0130    0.6682
Pt    0.0180    0.8605    0.6479
Pt    0.0162    0.9486    0.6920
Pt    0.1276    0.0129    0.6859
Pt    0.0170    0.9690    0.7140
Pt    0.0166    0.7985    0.7529
Pt    0.0180    0.0136    0.7133
Pt    0.2522    0.0135    0.7317
Pt    0.1451    0.0141    0.8838
Pt    0.2509    0.9952    0.7967
Pt    0.2551    0.9486    0.8429
Pt    0.2541    0.8175    0.8418
Pt    0.2546    0.9508    0.7967
Pt    0.2543    0.7740    0.8870
Pt    0.2314    0.9329    0.8891
Pt    0.0561    0.7974    0.7983
Pt    0.0578    0.7977    0.8453
Pt    0.0554    0.8400    0.7962
Pt    0.0586    0.8393    0.8434
Pt    0.0573    0.8835    0.8849
Pt    0.0546    0.9266    0.8377
Pt    0.0595    0.9272    0.8844
Pt    0.0579    0.9706    0.8386
Pt    0.0575    0.9719    0.8828
Pt    0.1004    0.7969    0.8011
Pt    0.1008    0.7964    0.8434
Pt    0.1010    0.7980    0.8862
Pt    0.0975    0.8429    0.7981
Pt    0.1002    0.8436    0.8389
Pt    0.1019    0.8412    0.8870
Pt    0.0980    0.8850    0.7965
Pt    0.1016    0.8859    0.8421
Pt    0.1014    0.8830    0.8847
Pt    0.0987    0.9268    0.8413
Pt    0.1006    0.9301    0.8852
Pt    0.1003    0.9700    0.8393
Pt    0.1031    0.9688    0.8826
Pt    0.1438    0.7970    0.8006
Pt    0.1444    0.7956    0.8410
Pt    0.1450    0.7978    0.8842
Pt    0.1426    0.8433    0.7965
Pt    0.1431    0.8404    0.8434
Pt    0.1463    0.8408    0.8860
Pt    0.1448    0.8861    0.7969
Pt    0.1441    0.8854    0.8408
Pt    0.1452    0.8842    0.8859
Pt    0.1424    0.9284    0.7992
Pt    0.1438    0.9273    0.8396
Pt    0.1457    0.9275    0.8868
Pt    0.1469    0.9715    0.8858
Pt    0.1887    0.7968    0.7982
Pt    0.1890    0.7958    0.8407
Pt    0.1880    0.7966    0.8855
Pt    0.1872    0.8398    0.7991
Pt    0.1873    0.8418    0.8413
Pt    0.1878    0.8383    0.8866
Pt    0.1882    0.8856    0.7972
Pt    0.1878    0.8861    0.8425
Pt    0.1893    0.8827    0.8856
Pt    0.1893    0.9315    0.7985
Pt    0.1875    0.9284    0.8416
Pt    0.1862    0.9291    0.8851
Pt    0.1873    0.9716    0.7988
Pt    0.1850    0.9742    0.8418
Pt    0.2315    0.7963    0.7997
Pt    0.2321    0.7968    0.8409
Pt    0.2332    0.7966    0.8866
Pt    0.2312    0.8418    0.7987
Pt    0.2317    0.8417    0.8446
Pt    0.0164    0.9696    0.7963
Pt    0.2326    0.8847    0.7981
Pt    0.2298    0.8865    0.8426
Pt    0.2332    0.8859    0.8869
Pt    0.2318    0.9304    0.7977
Pt    0.2311    0.9297    0.8417
Pt    0.2325    0.8387    0.8850
Pt    0.2310    0.9732    0.8001
Pt    0.2324    0.9732    0.8403
Pt    0.2534    0.9060    0.8434
Pt    0.2541    0.9069    0.7973
Pt    0.2541    0.8197    0.7970
Pt    0.2528    0.8608    0.8856
Pt    0.2534    0.8625    0.8433
Pt    0.2541    0.8637    0.7966
Pt    0.2536    0.8181    0.8850
Pt    0.2546    0.7756    0.8426
Pt    0.0563    0.7748    0.7752
Pt    0.0557    0.7779    0.8203
Pt    0.0578    0.8199    0.7773
Pt    0.0575    0.8176    0.8215
Pt    0.0547    0.8617    0.8626
Pt    0.0563    0.9052    0.8630
Pt    0.0550    0.9482    0.8175
Pt    0.0558    0.9495    0.8634
Pt    0.0613    0.9937    0.8165
Pt    0.0559    0.9926    0.8606
Pt    0.1013    0.7761    0.7759
Pt    0.1003    0.7743    0.8213
Pt    0.1017    0.7760    0.8631
Pt    0.0992    0.8211    0.7773
Pt    0.0986    0.8209    0.8213
Pt    0.1010    0.8184    0.8634
Pt    0.0971    0.8644    0.7758
Pt    0.0984    0.8659    0.8188
Pt    0.1023    0.8627    0.8632
Pt    0.0991    0.9061    0.8197
Pt    0.1004    0.9053    0.8636
Pt    0.1003    0.9476    0.8617
Pt    0.1031    0.9918    0.8617
Pt    0.1432    0.7755    0.7779
Pt    0.1452    0.7722    0.8207
Pt    0.1436    0.7727    0.8641
Pt    0.1434    0.8204    0.7793
Pt    0.1440    0.8193    0.8217
Pt    0.1441    0.8184    0.8635
Pt    0.1449    0.8634    0.7746
Pt    0.1437    0.8635    0.8191
Pt    0.1460    0.8638    0.8632
Pt    0.1424    0.9105    0.7763
Pt    0.1454    0.9058    0.8197
Pt    0.1447    0.9044    0.8627
Pt    0.1428    0.9504    0.8192
Pt    0.1429    0.9497    0.8604
Pt    0.1468    0.9912    0.8615
Pt    0.1878    0.7762    0.7771
Pt    0.1885    0.7748    0.8203
Pt    0.1901    0.7752    0.8643
Pt    0.1895    0.8184    0.7767
Pt    0.1891    0.8189    0.8211
Pt    0.1864    0.8183    0.8633
Pt    0.1872    0.8619    0.7768
Pt    0.1889    0.8638    0.8180
Pt    0.1890    0.8610    0.8649
Pt    0.1899    0.9087    0.7763
Pt    0.1891    0.9065    0.8193
Pt    0.1890    0.9082    0.8640
Pt    0.1878    0.9527    0.7755
Pt    0.1861    0.9514    0.8205
Pt    0.1874    0.9502    0.8622
Pt    0.2324    0.7745    0.7794
Pt    0.2323    0.7733    0.8191
Pt    0.2335    0.7741    0.8648
Pt    0.2334    0.8187    0.7760
Pt    0.2312    0.8202    0.8206
Pt    0.2319    0.8173    0.8640
Pt    0.2333    0.8623    0.7749
Pt    0.2306    0.8648    0.8201
Pt    0.2316    0.8627    0.8657
Pt    0.2325    0.9089    0.7734
Pt    0.2311    0.9067    0.8192
Pt    0.2328    0.9084    0.8654
Pt    0.2324    0.9515    0.7773
Pt    0.2331    0.9515    0.8201
Pt    0.2313    0.9518    0.8627
Pt    0.2306    0.9943    0.7753
Pt    0.2307    0.9950    0.8204
Pt    0.0355    0.7967    0.7762
Pt    0.0366    0.7976    0.8201
Pt    0.0374    0.8843    0.8613
Pt    0.0365    0.9265    0.8618
Pt    0.0388    0.9733    0.8154
Pt    0.0365    0.9716    0.8605
Pt    0.0778    0.7980    0.7773
Pt    0.0775    0.7973    0.8221
Pt    0.0806    0.7955    0.8662
Pt    0.0767    0.8427    0.7740
Pt    0.0762    0.8434    0.8198
Pt    0.0816    0.8406    0.8623
Pt    0.0761    0.8851    0.8192
Pt    0.0780    0.8824    0.8627
Pt    0.0781    0.9264    0.8614
Pt    0.0792    0.9709    0.8178
Pt    0.0790    0.9691    0.8608
Pt    0.1225    0.7979    0.7775
Pt    0.1219    0.7989    0.8221
Pt    0.1228    0.7968    0.8642
Pt    0.1215    0.8434    0.7752
Pt    0.1211    0.8426    0.8172
Pt    0.1227    0.8416    0.8665
Pt    0.1236    0.8863    0.7761
Pt    0.1215    0.8854    0.8201
Pt    0.1228    0.8854    0.8640
Pt    0.1213    0.9271    0.8192
Pt    0.1224    0.9276    0.8633
Pt    0.1230    0.9707    0.8591
Pt    0.1656    0.7974    0.7762
Pt    0.1662    0.7951    0.8203
Pt    0.1668    0.7955    0.8628
Pt    0.1671    0.8400    0.7778
Pt    0.1655    0.8435    0.8183
Pt    0.1668    0.8402    0.8647
Pt    0.1658    0.8869    0.7753
Pt    0.1670    0.8861    0.8203
Pt    0.1681    0.8852    0.8651
Pt    0.1669    0.9301    0.7764
Pt    0.1662    0.9290    0.8178
Pt    0.1654    0.9292    0.8644
Pt    0.1662    0.9696    0.8627
Pt    0.2104    0.7963    0.7768
Pt    0.2098    0.7975    0.8188
Pt    0.2095    0.7966    0.8623
Pt    0.2096    0.8395    0.7761
Pt    0.2086    0.8430    0.8195
Pt    0.2102    0.8407    0.8649
Pt    0.2102    0.8852    0.7773
Pt    0.2080    0.8862    0.8198
Pt    0.2101    0.8825    0.8655
Pt    0.2101    0.9312    0.7742
Pt    0.2093    0.9295    0.8189
Pt    0.2094    0.9308    0.8635
Pt    0.2097    0.9729    0.7763
Pt    0.2097    0.9733    0.8191
Pt    0.2546    0.7959    0.7768
Pt    0.2533    0.7978    0.8208
Pt    0.2552    0.7951    0.8650
Pt    0.2534    0.8409    0.7760
Pt    0.2515    0.8407    0.8204
Pt    0.2534    0.8389    0.8631
Pt    0.2525    0.8859    0.7738
Pt    0.2517    0.8837    0.8203
Pt    0.2519    0.8847    0.8627
Pt    0.2550    0.9290    0.7749
Pt    0.2537    0.9286    0.8188
Pt    0.2529    0.9295    0.8684
Pt    0.2517    0.9732    0.7777
Pt    0.2522    0.9731    0.8199
Pt    0.0352    0.7752    0.7973
Pt    0.0361    0.8186    0.7971
Pt    0.0370    0.8534    0.8850
Pt    0.0362    0.9060    0.8850
Pt    0.0338    0.9495    0.8404
Pt    0.0348    0.9480    0.8845
Pt    0.0415    0.9921    0.7928
Pt    0.0369    0.9941    0.8367
Pt    0.0347    0.9917    0.8830
Pt    0.0773    0.7757    0.7987
Pt    0.0771    0.7742    0.8418
Pt    0.0784    0.8183    0.7991
Pt    0.0786    0.8169    0.8441
Pt    0.0791    0.8197    0.8835
Pt    0.0753    0.8638    0.7949
Pt    0.0782    0.8640    0.8409
Pt    0.0780    0.8605    0.8833
Pt    0.0783    0.9047    0.8410
Pt    0.0780    0.9050    0.8831
Pt    0.0779    0.9481    0.8416
Pt    0.0782    0.9508    0.8836
Pt    0.0800    0.9917    0.8404
Pt    0.0809    0.9917    0.8826
Pt    0.1222    0.7755    0.8005
Pt    0.1222    0.7745    0.8413
Pt    0.1241    0.7768    0.8863
Pt    0.1210    0.8179    0.8010
Pt    0.1205    0.8210    0.8425
Pt    0.1245    0.8184    0.8875
Pt    0.1207    0.8666    0.7951
Pt    0.1234    0.8647    0.8406
Pt    0.1238    0.8624    0.8887
Pt    0.1223    0.9060    0.7982
Pt    0.1224    0.9084    0.8423
Pt    0.1243    0.9054    0.8863
Pt    0.1205    0.9491    0.8377
Pt    0.1257    0.9485    0.8842
Pt    0.1247    0.9909    0.8821
Pt    0.1662    0.7744    0.7980
Pt    0.1666    0.7751    0.8433
Pt    0.1673    0.7742    0.8864
Pt    0.1656    0.8174    0.7989
Pt    0.1657    0.8173    0.8416
Pt    0.1671    0.8179    0.8863
Pt    0.1667    0.8664    0.7971
Pt    0.1660    0.8640    0.8412
Pt    0.1663    0.8626    0.8861
Pt    0.1655    0.9070    0.7962
Pt    0.1674    0.9078    0.8416
Pt    0.1671    0.9061    0.8860
Pt    0.1662    0.9524    0.7978
Pt    0.1634    0.9509    0.8391
Pt    0.1683    0.9510    0.8860
Pt    0.1693    0.9895    0.8831
Pt    0.2093    0.7729    0.7996
Pt    0.2120    0.7736    0.8428
Pt    0.2116    0.7728    0.8869
Pt    0.2091    0.8210    0.7981
Pt    0.2119    0.8179    0.8419
Pt    0.2094    0.8182    0.8851
Pt    0.2103    0.8645    0.7977
Pt    0.2081    0.8637    0.8406
Pt    0.2091    0.8612    0.8879
Pt    0.2119    0.9096    0.7952
Pt    0.2085    0.9094    0.8422
Pt    0.2119    0.9080    0.8840
Pt    0.2096    0.9521    0.7984
Pt    0.2106    0.9512    0.8409
Pt    0.2097    0.9512    0.8844
Pt    0.2112    0.9934    0.7969
Pt    0.2542    0.7753    0.7978
Pt    0.0160    0.9949    0.8600
Pt    0.0155    0.9046    0.8612
Pt    0.0151    0.7740    0.7759
Pt    0.0182    0.8602    0.8607
Pt    0.2527    0.9089    0.8878
Pt    0.0170    0.9959    0.8141
Pt    0.0160    0.9726    0.8362
Pt    0.1030    0.0127    0.8402
Pt    0.0151    0.8801    0.8808
Pt    0.1670    0.0135    0.8663
Pt    0.0808    0.0140    0.8625
Pt    0.0582    0.0134    0.8852
Pt    0.1032    0.0133    0.8830
Pt    0.0169    0.9903    0.7748
Pt    0.0154    0.7959    0.7983
Pt    0.0164    0.9266    0.8848
Pt    0.0152    0.9264    0.8425
Pt    0.0411    0.0143    0.8158
Pt    0.0406    0.0140    0.7735
Pt    0.1242    0.0141    0.8620
Pt    0.2551    0.8639    0.9342
Pt    0.2566    0.8194    0.9759
Pt    0.2116    0.0139    0.9932
Pt    0.1899    0.0118    0.0139
Pt    0.2534    0.8182    0.9287
Pt    0.2537    0.7739    0.9728
Pt    0.2535    0.7716    0.9297
Pt    0.2139    0.9940    0.9693
Pt    0.2104    0.9450    0.9735
Pt    0.0598    0.8390    0.9274
Pt    0.0573    0.8383    0.9726
Pt    0.0552    0.8826    0.9265
Pt    0.0563    0.8823    0.9721
Pt    0.0581    0.9275    0.9292
Pt    0.0605    0.9263    0.9724
Pt    0.0576    0.9717    0.9293
Pt    0.0587    0.9714    0.9729
Pt    0.1028    0.8398    0.9274
Pt    0.1026    0.8374    0.9721
Pt    0.0991    0.8847    0.9280
Pt    0.1014    0.8827    0.9712
Pt    0.1030    0.9266    0.9274
Pt    0.1020    0.9270    0.9728
Pt    0.1017    0.9717    0.9282
Pt    0.1019    0.9716    0.9733
Pt    0.1458    0.7957    0.9301
Pt    0.1444    0.8379    0.9312
Pt    0.1473    0.8846    0.9301
Pt    0.1482    0.8839    0.9727
Pt    0.1452    0.9267    0.9287
Pt    0.1490    0.9268    0.9719
Pt    0.1448    0.9720    0.9270
Pt    0.1463    0.9691    0.9712
Pt    0.1879    0.7966    0.9315
Pt    0.1877    0.7979    0.9722
Pt    0.1882    0.8416    0.9327
Pt    0.1887    0.8398    0.9733
Pt    0.1909    0.8848    0.9297
Pt    0.1918    0.9288    0.9294
Pt    0.1906    0.9239    0.9728
Pt    0.1906    0.9693    0.9307
Pt    0.1904    0.9696    0.9735
Pt    0.2316    0.7978    0.9289
Pt    0.2328    0.7963    0.9738
Pt    0.2326    0.8426    0.9312
Pt    0.2328    0.8421    0.9742
Pt    0.2317    0.8858    0.9309
Pt    0.2101    0.9053    0.9285
Pt    0.2128    0.8626    0.9315
Pt    0.2099    0.8189    0.9749
Pt    0.2546    0.9896    0.0144
Pt    0.2118    0.8202    0.9309
Pt    0.0822    0.0138    0.9058
Pt    0.0153    0.9477    0.9071
Pt    0.0594    0.7934    0.0136
Pt    0.1461    0.8816    0.0141
Pt    0.2333    0.9687    0.0120
Pt    0.2104    0.7764    0.9737
Pt    0.0361    0.0136    0.9505
Pt    0.0372    0.0137    0.9046
Pt    0.1266    0.8605    0.0132
Pt    0.2086    0.7753    0.9310
Pt    0.0595    0.8195    0.9498
Pt    0.0598    0.8139    0.9929
Pt    0.0572    0.8588    0.9044
Pt    0.0580    0.8603    0.9474
Pt    0.0575    0.8589    0.9936
Pt    0.0557    0.9064    0.9060
Pt    0.0571    0.9045    0.9496
Pt    0.0572    0.9055    0.9943
Pt    0.0587    0.9511    0.9082
Pt    0.0593    0.9475    0.9497
Pt    0.0575    0.9488    0.9944
Pt    0.0600    0.9928    0.9062
Pt    0.0601    0.9929    0.9507
Pt    0.0597    0.9937    0.9951
Pt    0.0996    0.8179    0.9075
Pt    0.1011    0.8620    0.9082
Pt    0.1015    0.8620    0.9492
Pt    0.1018    0.8623    0.9938
Pt    0.1007    0.9055    0.9056
Pt    0.1001    0.9043    0.9515
Pt    0.1027    0.9044    0.9939
Pt    0.1022    0.9499    0.9064
Pt    0.1008    0.9494    0.9496
Pt    0.1017    0.9505    0.9944
Pt    0.1028    0.9913    0.9048
Pt    0.1035    0.9931    0.9515
Pt    0.1012    0.9935    0.9933
Pt    0.1450    0.7750    0.9083
Pt    0.1461    0.8182    0.9076
Pt    0.1462    0.8182    0.9541
Pt    0.1481    0.8629    0.9091
Pt    0.1445    0.8607    0.9508
Pt    0.1481    0.8606    0.9922
Pt    0.1445    0.9047    0.9085
Pt    0.1457    0.9052    0.9493
Pt    0.1456    0.9042    0.9943
Pt    0.1459    0.9498    0.9066
Pt    0.1458    0.9475    0.9505
Pt    0.1462    0.9479    0.9943
Pt    0.1477    0.9952    0.9055
Pt    0.1474    0.9913    0.9512
Pt    0.1446    0.9895    0.9960
Pt    0.1906    0.7744    0.9066
Pt    0.1878    0.7728    0.9513
Pt    0.1882    0.8196    0.9116
Pt    0.1887    0.8194    0.9529
Pt    0.1891    0.8633    0.9084
Pt    0.1917    0.8651    0.9508
Pt    0.1904    0.9063    0.9057
Pt    0.1897    0.9056    0.9508
Pt    0.1909    0.9489    0.9081
Pt    0.1901    0.9463    0.9528
Pt    0.1883    0.9448    0.9963
Pt    0.1909    0.9933    0.9486
Pt    0.1920    0.9917    0.9917
Pt    0.2315    0.7748    0.9093
Pt    0.2320    0.7756    0.9495
Pt    0.2318    0.7748    0.9951
Pt    0.2324    0.8198    0.9074
Pt    0.2359    0.8199    0.9537
Pt    0.2322    0.8200    0.9931
Pt    0.2335    0.8630    0.9080
Pt    0.2359    0.8625    0.9537
Pt    0.2322    0.9063    0.9084
Pt    0.2347    0.9921    0.9901
Pt    0.0356    0.7950    0.9938
Pt    0.0353    0.8357    0.9492
Pt    0.0370    0.8373    0.9936
Pt    0.0359    0.8799    0.9043
Pt    0.0362    0.8830    0.9499
Pt    0.0366    0.8820    0.9952
Pt    0.0376    0.9271    0.9065
Pt    0.0365    0.9268    0.9492
Pt    0.0347    0.9281    0.9923
Pt    0.0354    0.9718    0.9049
Pt    0.0353    0.9722    0.9509
Pt    0.0370    0.9705    0.9945
Pt    0.0801    0.8399    0.9071
Pt    0.0809    0.8407    0.9499
Pt    0.0810    0.8378    0.9946
Pt    0.0799    0.8859    0.9046
Pt    0.0787    0.8819    0.9506
Pt    0.0813    0.8835    0.9926
Pt    0.0798    0.9272    0.9046
Pt    0.0819    0.9264    0.9489
Pt    0.0800    0.9259    0.9935
Pt    0.0810    0.9702    0.9061
Pt    0.0806    0.9684    0.9494
Pt    0.0785    0.9697    0.9951
Pt    0.1246    0.7984    0.9086
Pt    0.1249    0.8394    0.9088
Pt    0.1232    0.8364    0.9516
Pt    0.1225    0.8850    0.9093
Pt    0.1230    0.8829    0.9511
Pt    0.1259    0.8821    0.9926
Pt    0.1224    0.9281    0.9058
Pt    0.1220    0.9286    0.9511
Pt    0.1232    0.9277    0.9937
Pt    0.1246    0.9710    0.9070
Pt    0.1250    0.9696    0.9519
Pt    0.1264    0.9692    0.9941
Pt    0.1681    0.7973    0.9074
Pt    0.1660    0.7956    0.9521
Pt    0.1672    0.8403    0.9104
Pt    0.1658    0.8404    0.9543
Pt    0.1685    0.8838    0.9069
Pt    0.1687    0.8854    0.9512
Pt    0.1721    0.8835    0.9944
Pt    0.1672    0.9292    0.9063
Pt    0.1687    0.9255    0.9489
Pt    0.1704    0.9238    0.9963
Pt    0.1684    0.9717    0.9086
Pt    0.1708    0.9694    0.9520
Pt    0.1671    0.9698    0.9950
Pt    0.2094    0.7985    0.9083
Pt    0.2130    0.7991    0.9520
Pt    0.2122    0.7955    0.9955
Pt    0.2098    0.8430    0.9085
Pt    0.2116    0.8405    0.9535
Pt    0.2129    0.8835    0.9083
Pt    0.2110    0.8851    0.9529
Pt    0.2113    0.9286    0.9088
Pt    0.2095    0.9680    0.9531
Pt    0.2134    0.9718    0.9912
Pt    0.2537    0.7961    0.9077
Pt    0.2522    0.7952    0.9511
Pt    0.2528    0.7971    0.9940
Pt    0.2527    0.8418    0.9074
Pt    0.2583    0.8424    0.9553
Pt    0.2550    0.8834    0.9112
Pt    0.0368    0.8157    0.9725
Pt    0.0352    0.8558    0.9264
Pt    0.0360    0.8600    0.9704
Pt    0.0359    0.9030    0.9284
Pt    0.0349    0.9057    0.9714
Pt    0.0376    0.9502    0.9292
Pt    0.0375    0.9478    0.9713
Pt    0.0371    0.9934    0.9283
Pt    0.0347    0.9933    0.9745
Pt    0.0802    0.8166    0.9720
Pt    0.0785    0.8617    0.9265
Pt    0.0794    0.8603    0.9724
Pt    0.0780    0.9055    0.9259
Pt    0.0794    0.9037    0.9721
Pt    0.0811    0.9476    0.9272
Pt    0.0808    0.9491    0.9737
Pt    0.0809    0.9920    0.9296
Pt    0.0792    0.9909    0.9714
Pt    0.1234    0.8142    0.9327
Pt    0.1253    0.8623    0.9297
Pt    0.1216    0.8618    0.9713
Pt    0.1223    0.9065    0.9306
Pt    0.1248    0.9068    0.9701
Pt    0.1237    0.9482    0.9296
Pt    0.1236    0.9478    0.9720
Pt    0.1245    0.9934    0.9296
Pt    0.1240    0.9921    0.9727
Pt    0.1659    0.7748    0.9309
Pt    0.1659    0.8172    0.9314
Pt    0.1686    0.8620    0.9309
Pt    0.1714    0.8641    0.9732
Pt    0.1697    0.9053    0.9278
Pt    0.1701    0.9049    0.9746
Pt    0.1679    0.9487    0.9305
Pt    0.1690    0.9487    0.9732
Pt    0.1699    0.9920    0.9287
Pt    0.1688    0.9929    0.9722
Pt    0.0152    0.9033    0.9062
Pt    0.0371    0.8156    0.0142
Pt    0.1680    0.0141    0.9935
Pt    0.1040    0.8378    0.0144
Pt    0.2123    0.9477    0.0125
Pt    0.0824    0.8166    0.0138
Pt    0.0603    0.0136    0.9286
Pt    0.0158    0.8801    0.9264
Pt    0.0593    0.8823    0.0146
Pt    0.0371    0.9938    0.0141
Pt    0.0364    0.8607    0.0143
Pt    0.0167    0.8598    0.9488
Pt    0.1936    0.9690    0.0139
Pt    0.1712    0.0134    0.9068
Pt    0.1219    0.0136    0.9076
Pt    0.1465    0.0137    0.9729
Pt    0.2150    0.9938    0.0133
Pt    0.1689    0.8633    0.0146
Pt    0.0368    0.7730    0.0147
Pt    0.1495    0.0143    0.9290
Pt    0.2539    0.7743    0.0146
Pt    0.1458    0.9265    0.0145
Pt    0.1479    0.0141    0.0143
Pt    0.5149    0.0359    0.0562
Pt    0.2735    0.1422    0.1014
Pt    0.2774    0.1900    0.1002
Pt    0.4276    0.1232    0.0164
Pt    0.2779    0.2320    0.0565
Pt    0.2759    0.2331    0.0992
Pt    0.5145    0.1016    0.0349
Pt    0.3390    0.0162    0.0782
Pt    0.4744    0.1248    0.1014
Pt    0.3189    0.0573    0.0563
Pt    0.3184    0.0560    0.1036
Pt    0.3165    0.0996    0.0571
Pt    0.3149    0.1007    0.0995
Pt    0.3176    0.1465    0.0998
Pt    0.3187    0.1905    0.1003
Pt    0.3216    0.2309    0.1013
Pt    0.4271    0.0144    0.0363
Pt    0.4514    0.1903    0.0158
Pt    0.4031    0.1016    0.0155
Pt    0.4487    0.0156    0.1017
Pt    0.3641    0.0591    0.0569
Pt    0.3620    0.0564    0.1007
Pt    0.2956    0.1237    0.1004
Pt    0.3603    0.1026    0.0582
Pt    0.3600    0.1021    0.1008
Pt    0.4739    0.2109    0.1055
Pt    0.3604    0.1455    0.0567
Pt    0.3595    0.1476    0.1000
Pt    0.3630    0.1870    0.1003
Pt    0.3630    0.2307    0.1020
Pt    0.4293    0.1688    0.0154
Pt    0.2955    0.0777    0.0592
Pt    0.3396    0.0330    0.0157
Pt    0.3843    0.2098    0.1012
Pt    0.4037    0.0588    0.0577
Pt    0.4052    0.0589    0.1009
Pt    0.2967    0.0340    0.0572
Pt    0.4050    0.1041    0.0593
Pt    0.4066    0.1026    0.1020
Pt    0.4290    0.2098    0.1020
Pt    0.4049    0.1441    0.0578
Pt    0.4070    0.1484    0.0987
Pt    0.4293    0.2144    0.0595
Pt    0.4082    0.1935    0.0564
Pt    0.4069    0.1906    0.1007
Pt    0.4069    0.2317    0.1021
Pt    0.4719    0.2110    0.0584
Pt    0.4279    0.0806    0.0574
Pt    0.5146    0.0365    0.1012
Pt    0.3833    0.0804    0.0995
Pt    0.4487    0.0568    0.0590
Pt    0.4496    0.0587    0.1005
Pt    0.5129    0.1234    0.1028
Pt    0.4488    0.1037    0.0585
Pt    0.4525    0.1037    0.1013
Pt    0.3824    0.0809    0.0597
Pt    0.4499    0.1461    0.0583
Pt    0.4500    0.1465    0.1014
Pt    0.3388    0.0343    0.1026
Pt    0.4508    0.1897    0.0605
Pt    0.4527    0.1907    0.1024
Pt    0.4495    0.2339    0.0635
Pt    0.3373    0.1243    0.1000
Pt    0.3419    0.2072    0.1005
Pt    0.3383    0.1234    0.0555
Pt    0.4309    0.0824    0.1044
Pt    0.4939    0.0560    0.0579
Pt    0.4915    0.0553    0.1020
Pt    0.2980    0.1668    0.0957
Pt    0.4940    0.1014    0.0569
Pt    0.4933    0.0996    0.1033
Pt    0.4739    0.1677    0.0592
Pt    0.4939    0.1445    0.0586
Pt    0.4955    0.1473    0.1011
Pt    0.5143    0.0357    0.0156
Pt    0.4937    0.1900    0.0589
Pt    0.4963    0.1907    0.1025
Pt    0.2990    0.2529    0.0573
Pt    0.4956    0.2362    0.0577
Pt    0.3635    0.1469    0.0160
Pt    0.2729    0.1210    0.1224
Pt    0.2759    0.1665    0.1218
Pt    0.2761    0.2108    0.0789
Pt    0.2768    0.2113    0.1217
Pt    0.2769    0.2542    0.0345
Pt    0.2744    0.2525    0.0775
Pt    0.2745    0.2540    0.1217
Pt    0.3208    0.0344    0.0382
Pt    0.3180    0.0367    0.0788
Pt    0.3153    0.0799    0.0352
Pt    0.3186    0.0796    0.0792
Pt    0.3180    0.0795    0.1225
Pt    0.3150    0.1231    0.0780
Pt    0.3180    0.1246    0.1210
Pt    0.3151    0.1664    0.1229
Pt    0.3232    0.2094    0.0793
Pt    0.3194    0.2115    0.1237
Pt    0.3205    0.2508    0.0759
Pt    0.3192    0.2553    0.1208
Pt    0.3610    0.0366    0.0341
Pt    0.3619    0.0354    0.0793
Pt    0.3614    0.0348    0.1227
Pt    0.3618    0.0815    0.0362
Pt    0.3616    0.0807    0.0806
Pt    0.3603    0.0800    0.1219
Pt    0.3609    0.1247    0.0354
Pt    0.3595    0.1230    0.0799
Pt    0.3627    0.1238    0.1230
Pt    0.3659    0.1683    0.0775
Pt    0.3622    0.1676    0.1231
Pt    0.3622    0.2110    0.1234
Pt    0.3649    0.2545    0.1231
Pt    0.4065    0.0360    0.0357
Pt    0.4051    0.0361    0.0801
Pt    0.4051    0.0364    0.1221
Pt    0.4035    0.0814    0.0388
Pt    0.4059    0.0816    0.0797
Pt    0.4037    0.0806    0.1228
Pt    0.4052    0.1242    0.0359
Pt    0.4082    0.1241    0.0806
Pt    0.4054    0.1257    0.1219
Pt    0.4079    0.1680    0.0343
Pt    0.4064    0.1704    0.0776
Pt    0.4082    0.1666    0.1223
Pt    0.4082    0.2127    0.0803
Pt    0.4065    0.2114    0.1237
Pt    0.4077    0.2526    0.1252
Pt    0.4499    0.0365    0.0350
Pt    0.4490    0.0357    0.0796
Pt    0.4475    0.0378    0.1236
Pt    0.4492    0.0792    0.0357
Pt    0.4491    0.0807    0.0802
Pt    0.4520    0.0806    0.1245
Pt    0.4497    0.1257    0.0367
Pt    0.4518    0.1249    0.0796
Pt    0.4511    0.1245    0.1210
Pt    0.4512    0.1689    0.0386
Pt    0.4504    0.1692    0.0821
Pt    0.4482    0.1679    0.1231
Pt    0.4529    0.2092    0.0371
Pt    0.4522    0.2129    0.0817
Pt    0.4493    0.2122    0.1235
Pt    0.4924    0.0360    0.0360
Pt    0.4919    0.0347    0.0790
Pt    0.4909    0.0365    0.1243
Pt    0.4935    0.0783    0.0359
Pt    0.4937    0.0778    0.0778
Pt    0.4922    0.0795    0.1244
Pt    0.4945    0.1239    0.0366
Pt    0.4939    0.1237    0.0802
Pt    0.4941    0.1246    0.1253
Pt    0.4959    0.1669    0.0353
Pt    0.4961    0.1695    0.0813
Pt    0.4948    0.1698    0.1236
Pt    0.4939    0.2137    0.0374
Pt    0.4979    0.2128    0.0844
Pt    0.4947    0.2550    0.0364
Pt    0.3821    0.1254    0.0592
Pt    0.2967    0.0579    0.0348
Pt    0.2987    0.0596    0.0797
Pt    0.2957    0.1016    0.1219
Pt    0.2956    0.1449    0.1214
Pt    0.2978    0.1935    0.0800
Pt    0.2973    0.1893    0.1210
Pt    0.3002    0.2357    0.0328
Pt    0.2995    0.2301    0.0772
Pt    0.2972    0.2343    0.1235
Pt    0.3834    0.0367    0.1017
Pt    0.4721    0.1221    0.0574
Pt    0.4695    0.0339    0.1014
Pt    0.3405    0.0585    0.0362
Pt    0.3396    0.0578    0.0822
Pt    0.3388    0.0557    0.1244
Pt    0.3368    0.1014    0.0353
Pt    0.3387    0.1017    0.0794
Pt    0.3388    0.1025    0.1205
Pt    0.3394    0.1469    0.0797
Pt    0.3388    0.1465    0.1221
Pt    0.3415    0.1877    0.0795
Pt    0.3417    0.1874    0.1240
Pt    0.3453    0.2292    0.0798
Pt    0.3422    0.2323    0.1215
Pt    0.3842    0.0356    0.0585
Pt    0.3827    0.1244    0.1013
Pt    0.4710    0.0351    0.0580
Pt    0.3831    0.0585    0.0346
Pt    0.3845    0.0572    0.0806
Pt    0.3819    0.0576    0.1236
Pt    0.3823    0.1048    0.0368
Pt    0.3839    0.1033    0.0809
Pt    0.3846    0.1016    0.1246
Pt    0.3838    0.1455    0.0363
Pt    0.3843    0.1457    0.0787
Pt    0.3838    0.1475    0.1198
Pt    0.3857    0.1925    0.0743
Pt    0.3852    0.1891    0.1227
Pt    0.3856    0.2327    0.1238
Pt    0.3383    0.1689    0.1014
Pt    0.3417    0.0362    0.0571
Pt    0.2988    0.2121    0.1007
Pt    0.4285    0.0563    0.0375
Pt    0.4269    0.0590    0.0813
Pt    0.4269    0.0597    0.1219
Pt    0.4272    0.1005    0.0369
Pt    0.4294    0.1029    0.0805
Pt    0.4298    0.1058    0.1244
Pt    0.4265    0.1461    0.0364
Pt    0.4291    0.1483    0.0786
Pt    0.4291    0.1453    0.1242
Pt    0.4289    0.1914    0.0363
Pt    0.4291    0.1916    0.0795
Pt    0.4273    0.1900    0.1247
Pt    0.4312    0.2347    0.1226
Pt    0.3389    0.0151    0.1255
Pt    0.4293    0.1703    0.0577
Pt    0.3838    0.2502    0.1005
Pt    0.4700    0.0578    0.0357
Pt    0.4704    0.0576    0.0800
Pt    0.4710    0.0594    0.1227
Pt    0.4685    0.1015    0.0363
Pt    0.4719    0.1012    0.0797
Pt    0.4722    0.1040    0.1249
Pt    0.4735    0.1456    0.0362
Pt    0.4725    0.1460    0.0809
Pt    0.4713    0.1470    0.1226
Pt    0.4733    0.1894    0.0380
Pt    0.4747    0.1914    0.0818
Pt    0.4729    0.1923    0.1271
Pt    0.4702    0.2341    0.0414
Pt    0.4759    0.2327    0.0803
Pt    0.4717    0.1699    0.1025
Pt    0.3410    0.0785    0.0586
Pt    0.2978    0.2525    0.0963
Pt    0.4270    0.0374    0.1017
Pt    0.4291    0.1261    0.1007
Pt    0.4275    0.0368    0.0595
Pt    0.4280    0.1705    0.1000
Pt    0.4274    0.1241    0.0569
Pt    0.3424    0.2523    0.1001
Pt    0.2759    0.0348    0.0345
Pt    0.3856    0.1692    0.1004
Pt    0.4736    0.0802    0.1006
Pt    0.3846    0.1679    0.0558
Pt    0.3384    0.0793    0.1001
Pt    0.4727    0.0799    0.0574
Pt    0.4729    0.2115    0.0153
Pt    0.2768    0.2310    0.0172
Pt    0.5149    0.2334    0.0349
Pt    0.3846    0.1687    0.0176
Pt    0.5132    0.1902    0.0372
Pt    0.4917    0.1029    0.0155
Pt    0.4700    0.0799    0.0158
Pt    0.4722    0.1670    0.0151
Pt    0.2964    0.0146    0.0364
Pt    0.4912    0.2350    0.0151
Pt    0.4701    0.0363    0.1451
Pt    0.2769    0.0547    0.2336
Pt    0.2749    0.1028    0.1462
Pt    0.2763    0.1008    0.1898
Pt    0.2762    0.1001    0.2324
Pt    0.2770    0.1439    0.1448
Pt    0.2748    0.1463    0.1882
Pt    0.2775    0.1460    0.2327
Pt    0.4013    0.0148    0.1890
Pt    0.2766    0.1891    0.1888
Pt    0.2759    0.1862    0.2323
Pt    0.2750    0.1894    0.1447
Pt    0.2757    0.2328    0.1873
Pt    0.2773    0.2325    0.2325
Pt    0.3166    0.1001    0.1458
Pt    0.3205    0.0997    0.1878
Pt    0.3196    0.0994    0.2308
Pt    0.3175    0.1465    0.1456
Pt    0.3199    0.1440    0.1881
Pt    0.3193    0.1442    0.2332
Pt    0.3191    0.1891    0.1450
Pt    0.3190    0.1876    0.1892
Pt    0.3198    0.1888    0.2332
Pt    0.3208    0.2351    0.1439
Pt    0.3211    0.2319    0.1869
Pt    0.3193    0.2317    0.2323
Pt    0.2961    0.2556    0.1436
Pt    0.3579    0.0594    0.1460
Pt    0.3609    0.1019    0.1447
Pt    0.3629    0.1015    0.1889
Pt    0.3618    0.0978    0.2325
Pt    0.3654    0.1459    0.1438
Pt    0.3608    0.1430    0.1882
Pt    0.3642    0.1465    0.2312
Pt    0.3635    0.1898    0.1449
Pt    0.3639    0.1894    0.1883
Pt    0.3638    0.1873    0.2335
Pt    0.3664    0.2342    0.1458
Pt    0.3660    0.2323    0.1873
Pt    0.3648    0.2332    0.2315
Pt    0.4872    0.0429    0.2574
Pt    0.4286    0.1679    0.1448
Pt    0.4050    0.0597    0.1439
Pt    0.4025    0.0573    0.1896
Pt    0.4073    0.1034    0.1436
Pt    0.4054    0.1025    0.1866
Pt    0.4068    0.1013    0.2321
Pt    0.4073    0.1454    0.1442
Pt    0.4048    0.1453    0.1873
Pt    0.4062    0.1434    0.2332
Pt    0.4088    0.1904    0.1461
Pt    0.4093    0.1896    0.1898
Pt    0.4085    0.1902    0.2337
Pt    0.4100    0.2323    0.1469
Pt    0.4104    0.2306    0.1889
Pt    0.4099    0.2326    0.2337
Pt    0.4326    0.2100    0.1893
Pt    0.4318    0.2142    0.1480
Pt    0.4493    0.0566    0.1455
Pt    0.4480    0.0588    0.1888
Pt    0.4485    0.0579    0.2299
Pt    0.4518    0.1018    0.1466
Pt    0.4507    0.1030    0.1875
Pt    0.4526    0.1479    0.1450
Pt    0.4527    0.1475    0.1923
Pt    0.4488    0.1914    0.1467
Pt    0.4529    0.1887    0.1909
Pt    0.4543    0.1869    0.2312
Pt    0.4532    0.2344    0.1903
Pt    0.4565    0.2305    0.2321
Pt    0.4279    0.1660    0.2310
Pt    0.4342    0.2088    0.2320
Pt    0.4279    0.1213    0.2323
Pt    0.4932    0.0599    0.1452
Pt    0.4909    0.0580    0.1882
Pt    0.4922    0.0590    0.2338
Pt    0.4944    0.1019    0.1455
Pt    0.4929    0.1017    0.1933
Pt    0.4948    0.1467    0.1458
Pt    0.4920    0.2345    0.2311
Pt    0.2762    0.0333    0.2546
Pt    0.2767    0.0783    0.2106
Pt    0.2774    0.0765    0.2549
Pt    0.2769    0.1238    0.1676
Pt    0.2797    0.1242    0.2106
Pt    0.2777    0.1201    0.2550
Pt    0.2769    0.1661    0.1664
Pt    0.2752    0.1680    0.2097
Pt    0.2782    0.1662    0.2535
Pt    0.2757    0.2110    0.1665
Pt    0.2769    0.2106    0.2098
Pt    0.2761    0.2108    0.2547
Pt    0.2761    0.2560    0.1651
Pt    0.2778    0.2563    0.2091
Pt    0.2783    0.2549    0.2526
Pt    0.3194    0.0782    0.2091
Pt    0.3176    0.0755    0.2521
Pt    0.3203    0.1220    0.1658
Pt    0.3200    0.1210    0.2092
Pt    0.3193    0.1216    0.2535
Pt    0.3175    0.1662    0.1682
Pt    0.3207    0.1676    0.2096
Pt    0.3199    0.1665    0.2536
Pt    0.3206    0.2097    0.1672
Pt    0.3199    0.2098    0.2113
Pt    0.3191    0.2107    0.2539
Pt    0.3193    0.2542    0.1662
Pt    0.3194    0.2547    0.2076
Pt    0.3199    0.2541    0.2525
Pt    0.3613    0.0811    0.1666
Pt    0.3619    0.1227    0.1668
Pt    0.3648    0.1229    0.2111
Pt    0.3618    0.1207    0.2534
Pt    0.3633    0.1678    0.1638
Pt    0.3625    0.1658    0.2088
Pt    0.3615    0.1667    0.2546
Pt    0.3629    0.2111    0.1662
Pt    0.3646    0.2116    0.2096
Pt    0.3641    0.2118    0.2522
Pt    0.3645    0.2548    0.1669
Pt    0.3657    0.2523    0.2102
Pt    0.3636    0.2547    0.2562
Pt    0.4036    0.0364    0.1686
Pt    0.4048    0.0787    0.1679
Pt    0.4058    0.0798    0.2096
Pt    0.4080    0.1245    0.1665
Pt    0.4066    0.1238    0.2108
Pt    0.4068    0.1236    0.2535
Pt    0.4068    0.1673    0.1655
Pt    0.4064    0.1673    0.2106
Pt    0.4061    0.1674    0.2543
Pt    0.4101    0.2108    0.1684
Pt    0.4093    0.2097    0.2119
Pt    0.4098    0.2090    0.2548
Pt    0.4119    0.2545    0.1669
Pt    0.4101    0.2519    0.2120
Pt    0.4085    0.2547    0.2565
Pt    0.4478    0.0359    0.1686
Pt    0.4472    0.0360    0.2091
Pt    0.4505    0.0803    0.1680
Pt    0.4474    0.0811    0.2099
Pt    0.4520    0.1272    0.1693
Pt    0.4492    0.1230    0.2091
Pt    0.4525    0.1697    0.1690
Pt    0.4544    0.2084    0.2103
Pt    0.4538    0.2069    0.2548
Pt    0.4539    0.2546    0.2116
Pt    0.4542    0.2544    0.2570
Pt    0.4925    0.0376    0.1681
Pt    0.4906    0.0364    0.2136
Pt    0.5148    0.0800    0.1435
Pt    0.4932    0.0806    0.1704
Pt    0.4937    0.0790    0.2118
Pt    0.4958    0.1274    0.1683
Pt    0.4955    0.2523    0.2548
Pt    0.4682    0.0352    0.1874
Pt    0.3016    0.0538    0.2504
Pt    0.2965    0.1012    0.1672
Pt    0.2973    0.1000    0.2098
Pt    0.2981    0.0992    0.2530
Pt    0.2967    0.1452    0.1668
Pt    0.2996    0.1459    0.2113
Pt    0.2976    0.1443    0.2541
Pt    0.2970    0.1886    0.1658
Pt    0.2989    0.1894    0.2125
Pt    0.2982    0.1891    0.2552
Pt    0.2974    0.2313    0.1649
Pt    0.2968    0.2327    0.2082
Pt    0.2980    0.2331    0.2539
Pt    0.3414    0.1017    0.1669
Pt    0.3413    0.0996    0.2102
Pt    0.3418    0.0994    0.2531
Pt    0.3417    0.1448    0.1647
Pt    0.3411    0.1452    0.2081
Pt    0.3414    0.1439    0.2542
Pt    0.3422    0.1899    0.1670
Pt    0.3428    0.1887    0.2109
Pt    0.3410    0.1887    0.2557
Pt    0.3418    0.2315    0.1656
Pt    0.3427    0.2310    0.2107
Pt    0.3433    0.2325    0.2518
Pt    0.4748    0.2569    0.2346
Pt    0.3803    0.0573    0.1679
Pt    0.3849    0.1014    0.1644
Pt    0.3833    0.1022    0.2108
Pt    0.3864    0.0986    0.2524
Pt    0.3851    0.1459    0.1650
Pt    0.3859    0.1437    0.2092
Pt    0.3846    0.1449    0.2530
Pt    0.3855    0.1901    0.1672
Pt    0.3838    0.1884    0.2106
Pt    0.3851    0.1892    0.2532
Pt    0.3884    0.2333    0.1681
Pt    0.3877    0.2299    0.2108
Pt    0.3846    0.2326    0.2552
Pt    0.4675    0.0362    0.2351
Pt    0.4258    0.0564    0.1672
Pt    0.4263    0.0578    0.2102
Pt    0.4287    0.1035    0.1670
Pt    0.4259    0.1003    0.2090
Pt    0.4305    0.1476    0.1683
Pt    0.4285    0.1449    0.2103
Pt    0.4295    0.1460    0.2550
Pt    0.4294    0.1874    0.1675
Pt    0.4314    0.1875    0.2119
Pt    0.4305    0.1856    0.2527
Pt    0.4336    0.2331    0.1677
Pt    0.4313    0.2329    0.2116
Pt    0.4337    0.2309    0.2536
Pt    0.4336    0.2546    0.1882
Pt    0.4277    0.1663    0.1882
Pt    0.4704    0.0597    0.1674
Pt    0.4698    0.0567    0.2095
Pt    0.4750    0.1032    0.1701
Pt    0.4705    0.1030    0.2133
Pt    0.4756    0.1481    0.1702
Pt    0.4759    0.2294    0.2563
Pt    0.4736    0.1674    0.1468
Pt    0.4738    0.1248    0.1904
Pt    0.4725    0.1226    0.1478
Pt    0.4330    0.2538    0.1436
Pt    0.4329    0.2523    0.2346
Pt    0.4699    0.0789    0.2292
Pt    0.4701    0.0820    0.1919
Pt    0.4722    0.0809    0.1469
Pt    0.2965    0.0325    0.2316
Pt    0.2971    0.0811    0.1879
Pt    0.2984    0.0776    0.2305
Pt    0.2966    0.1222    0.1449
Pt    0.2992    0.1223    0.1881
Pt    0.2988    0.1223    0.2328
Pt    0.2959    0.1668    0.1441
Pt    0.2961    0.1674    0.1879
Pt    0.2982    0.1668    0.2312
Pt    0.2962    0.2084    0.1432
Pt    0.2988    0.2102    0.1877
Pt    0.2982    0.2116    0.2334
Pt    0.4290    0.1255    0.1887
Pt    0.2985    0.2538    0.1861
Pt    0.2996    0.2532    0.2301
Pt    0.3400    0.0817    0.1440
Pt    0.3440    0.0795    0.1916
Pt    0.3411    0.0780    0.2335
Pt    0.3406    0.1248    0.1428
Pt    0.3423    0.1218    0.1881
Pt    0.3413    0.1228    0.2306
Pt    0.3394    0.1669    0.1453
Pt    0.3408    0.1662    0.1863
Pt    0.3399    0.1661    0.2339
Pt    0.3400    0.2107    0.1432
Pt    0.3418    0.2096    0.1903
Pt    0.3420    0.2098    0.2327
Pt    0.3436    0.2559    0.1446
Pt    0.3438    0.2533    0.1892
Pt    0.3425    0.2542    0.2302
Pt    0.3818    0.0363    0.1464
Pt    0.3816    0.0783    0.1456
Pt    0.3835    0.0817    0.1897
Pt    0.3859    0.1244    0.1444
Pt    0.3833    0.1237    0.1873
Pt    0.3847    0.1223    0.2331
Pt    0.3849    0.1688    0.1442
Pt    0.3856    0.1670    0.1870
Pt    0.3849    0.1666    0.2327
Pt    0.3859    0.2101    0.1455
Pt    0.3854    0.2100    0.1877
Pt    0.3856    0.2105    0.2331
Pt    0.3887    0.2557    0.1482
Pt    0.3876    0.2541    0.1892
Pt    0.3877    0.2536    0.2330
Pt    0.4255    0.0364    0.1439
Pt    0.4246    0.0358    0.1897
Pt    0.4278    0.0799    0.1468
Pt    0.4267    0.0797    0.1864
Pt    0.4329    0.1260    0.1470
Pt    0.2761    0.2323    0.1438
Pt    0.4453    0.0149    0.1883
Pt    0.4244    0.0165    0.1660
Pt    0.5124    0.0581    0.2113
Pt    0.5117    0.0367    0.2354
Pt    0.5143    0.0814    0.1906
Pt    0.4482    0.0157    0.1437
Pt    0.4879    0.0156    0.2360
Pt    0.5134    0.0363    0.1911
Pt    0.5140    0.2276    0.2529
Pt    0.5140    0.0367    0.1462
Pt    0.4692    0.0165    0.2121
Pt    0.4899    0.0147    0.1902
Pt    0.5140    0.1234    0.1897
Pt    0.5140    0.1690    0.1448
Pt    0.4915    0.0149    0.1496
Pt    0.3823    0.0166    0.1674
Pt    0.5150    0.1046    0.1672
Pt    0.5140    0.2540    0.2277
Pt    0.4680    0.0146    0.1668
Pt    0.5122    0.0143    0.2547
Pt    0.4706    0.2089    0.3226
Pt    0.2761    0.0564    0.2780
Pt    0.2763    0.0537    0.3228
Pt    0.2767    0.0987    0.2757
Pt    0.2766    0.1007    0.3214
Pt    0.2763    0.0989    0.3644
Pt    0.2770    0.1437    0.2767
Pt    0.2777    0.1444    0.3204
Pt    0.2779    0.1460    0.3645
Pt    0.2778    0.1891    0.2772
Pt    0.2769    0.1876    0.3176
Pt    0.2759    0.1902    0.3626
Pt    0.2774    0.2327    0.2754
Pt    0.2742    0.2324    0.3187
Pt    0.2772    0.2317    0.3634
Pt    0.3211    0.0573    0.2749
Pt    0.3198    0.0527    0.3223
Pt    0.3198    0.0969    0.2736
Pt    0.3193    0.1004    0.3206
Pt    0.3193    0.0980    0.3648
Pt    0.3189    0.1446    0.2752
Pt    0.3186    0.1429    0.3186
Pt    0.3203    0.1440    0.3640
Pt    0.3194    0.1900    0.2775
Pt    0.3199    0.1864    0.3193
Pt    0.3210    0.1853    0.3635
Pt    0.3209    0.2339    0.2753
Pt    0.3206    0.2326    0.3211
Pt    0.3191    0.2322    0.3654
Pt    0.4730    0.2082    0.2777
Pt    0.3620    0.0584    0.3632
Pt    0.3642    0.0982    0.2745
Pt    0.3646    0.0998    0.3175
Pt    0.3616    0.0974    0.3630
Pt    0.3627    0.1409    0.2739
Pt    0.3632    0.1459    0.3188
Pt    0.3623    0.1433    0.3629
Pt    0.3640    0.1897    0.2764
Pt    0.3633    0.1866    0.3191
Pt    0.3629    0.1896    0.3667
Pt    0.3644    0.2312    0.2778
Pt    0.3625    0.2309    0.3203
Pt    0.3631    0.2306    0.3645
Pt    0.5133    0.1462    0.3854
Pt    0.4059    0.0565    0.3604
Pt    0.4100    0.0984    0.3170
Pt    0.4070    0.0992    0.3612
Pt    0.4057    0.1447    0.2747
Pt    0.4053    0.1437    0.3180
Pt    0.4042    0.1422    0.3632
Pt    0.4072    0.1895    0.2766
Pt    0.4072    0.1884    0.3185
Pt    0.4061    0.1878    0.3632
Pt    0.4099    0.2322    0.2739
Pt    0.4099    0.2333    0.3205
Pt    0.4075    0.2321    0.3626
Pt    0.4704    0.1650    0.3615
Pt    0.4709    0.1235    0.3605
Pt    0.4502    0.0590    0.3181
Pt    0.4499    0.0578    0.3596
Pt    0.4490    0.1010    0.3617
Pt    0.4485    0.1442    0.3219
Pt    0.4488    0.1427    0.3624
Pt    0.4536    0.1835    0.2759
Pt    0.4522    0.1876    0.3207
Pt    0.4522    0.1897    0.3675
Pt    0.4508    0.2297    0.2770
Pt    0.4515    0.2309    0.3211
Pt    0.4531    0.2321    0.3656
Pt    0.4717    0.0819    0.3606
Pt    0.4681    0.0800    0.3159
Pt    0.4661    0.0161    0.2948
Pt    0.4914    0.0576    0.3176
Pt    0.4938    0.0574    0.3605
Pt    0.4928    0.1023    0.3600
Pt    0.4930    0.1451    0.3609
Pt    0.4958    0.2284    0.2786
Pt    0.4934    0.2300    0.3232
Pt    0.2750    0.0348    0.3009
Pt    0.2778    0.0781    0.2988
Pt    0.2771    0.0781    0.3427
Pt    0.2773    0.1220    0.2975
Pt    0.2757    0.1214    0.3415
Pt    0.2755    0.1215    0.3849
Pt    0.2762    0.1652    0.2973
Pt    0.2755    0.1647    0.3434
Pt    0.2756    0.1673    0.3842
Pt    0.2765    0.2101    0.2964
Pt    0.2759    0.2106    0.3417
Pt    0.2773    0.2104    0.3860
Pt    0.2768    0.2549    0.2939
Pt    0.2756    0.2522    0.3409
Pt    0.5122    0.0379    0.2734
Pt    0.3201    0.0365    0.2970
Pt    0.3189    0.0756    0.3011
Pt    0.3193    0.0754    0.3415
Pt    0.3204    0.0773    0.3881
Pt    0.3205    0.1216    0.2988
Pt    0.3190    0.1208    0.3424
Pt    0.3188    0.1236    0.3847
Pt    0.3215    0.1657    0.2968
Pt    0.3210    0.1654    0.3419
Pt    0.3191    0.1659    0.3842
Pt    0.3199    0.2109    0.2991
Pt    0.3189    0.2093    0.3431
Pt    0.3180    0.2089    0.3861
Pt    0.3199    0.2551    0.2980
Pt    0.3179    0.2544    0.3423
Pt    0.3194    0.2544    0.3870
Pt    0.3631    0.0344    0.3850
Pt    0.3643    0.0786    0.2969
Pt    0.3646    0.0766    0.3412
Pt    0.3595    0.0781    0.3846
Pt    0.3629    0.1197    0.2943
Pt    0.3624    0.1210    0.3413
Pt    0.3633    0.1227    0.3838
Pt    0.3646    0.1652    0.2961
Pt    0.3619    0.1665    0.3418
Pt    0.3632    0.1647    0.3862
Pt    0.3629    0.2100    0.3000
Pt    0.3638    0.2079    0.3440
Pt    0.3623    0.2109    0.3876
Pt    0.3648    0.2523    0.2988
Pt    0.3641    0.2522    0.3430
Pt    0.3631    0.2533    0.3870
Pt    0.4054    0.0348    0.3819
Pt    0.4054    0.0780    0.3410
Pt    0.4071    0.0763    0.3844
Pt    0.4065    0.1217    0.2977
Pt    0.4073    0.1211    0.3401
Pt    0.4029    0.1217    0.3842
Pt    0.4064    0.1642    0.2960
Pt    0.4058    0.1659    0.3416
Pt    0.4047    0.1660    0.3865
Pt    0.4074    0.2122    0.2976
Pt    0.4085    0.2096    0.3418
Pt    0.4079    0.2102    0.3859
Pt    0.4063    0.2515    0.2970
Pt    0.4080    0.2535    0.3408
Pt    0.4100    0.2531    0.3862
Pt    0.4514    0.0368    0.3389
Pt    0.4498    0.0356    0.3842
Pt    0.4507    0.0799    0.3386
Pt    0.4491    0.0798    0.3833
Pt    0.4495    0.1231    0.3408
Pt    0.4489    0.1228    0.3857
Pt    0.4502    0.1640    0.3003
Pt    0.4482    0.1652    0.3422
Pt    0.4514    0.1651    0.3837
Pt    0.4502    0.2086    0.2987
Pt    0.4490    0.2089    0.3432
Pt    0.4506    0.2119    0.3868
Pt    0.4524    0.2522    0.2984
Pt    0.4498    0.2527    0.3428
Pt    0.4919    0.0378    0.2952
Pt    0.4925    0.0366    0.3388
Pt    0.4935    0.0359    0.3833
Pt    0.4926    0.0810    0.3379
Pt    0.4940    0.0810    0.3815
Pt    0.4935    0.1246    0.3823
Pt    0.4930    0.1683    0.3813
Pt    0.4916    0.2094    0.3011
Pt    0.4983    0.2554    0.3043
Pt    0.5134    0.0361    0.3607
Pt    0.2983    0.0557    0.2984
Pt    0.2977    0.0541    0.3427
Pt    0.3000    0.1003    0.2984
Pt    0.2976    0.0993    0.3434
Pt    0.2963    0.1000    0.3857
Pt    0.2994    0.1440    0.2969
Pt    0.2994    0.1449    0.3429
Pt    0.2978    0.1442    0.3842
Pt    0.2991    0.1870    0.2983
Pt    0.2980    0.1891    0.3397
Pt    0.2974    0.1865    0.3859
Pt    0.2988    0.2314    0.2994
Pt    0.2977    0.2310    0.3426
Pt    0.4263    0.1211    0.3634
Pt    0.3426    0.0573    0.2959
Pt    0.3429    0.0554    0.3405
Pt    0.3401    0.0989    0.2957
Pt    0.3415    0.0985    0.3401
Pt    0.3413    0.1017    0.3848
Pt    0.3414    0.1407    0.2969
Pt    0.3416    0.1428    0.3408
Pt    0.3404    0.1431    0.3863
Pt    0.3417    0.1879    0.2978
Pt    0.3405    0.1872    0.3414
Pt    0.3423    0.1845    0.3870
Pt    0.3420    0.2337    0.2985
Pt    0.3402    0.2316    0.3454
Pt    0.3406    0.2334    0.3887
Pt    0.4704    0.0363    0.3615
Pt    0.3824    0.0563    0.3835
Pt    0.3869    0.1003    0.2996
Pt    0.3845    0.1000    0.3412
Pt    0.3827    0.0993    0.3843
Pt    0.3833    0.1409    0.2960
Pt    0.3833    0.1452    0.3411
Pt    0.3841    0.1438    0.3856
Pt    0.3857    0.1884    0.2981
Pt    0.3842    0.1876    0.3425
Pt    0.3857    0.1904    0.3869
Pt    0.3857    0.2312    0.3018
Pt    0.3839    0.2311    0.3432
Pt    0.3853    0.2318    0.3863
Pt    0.4692    0.0356    0.3175
Pt    0.2969    0.2322    0.3872
Pt    0.4278    0.0574    0.3375
Pt    0.4272    0.0574    0.3833
Pt    0.4286    0.0977    0.3399
Pt    0.4273    0.1003    0.3842
Pt    0.4296    0.1429    0.2980
Pt    0.4267    0.1435    0.3420
Pt    0.4276    0.1433    0.3844
Pt    0.4292    0.1882    0.2972
Pt    0.4289    0.1876    0.3428
Pt    0.4273    0.1876    0.3851
Pt    0.4290    0.2328    0.2989
Pt    0.4299    0.2307    0.3430
Pt    0.4291    0.2307    0.3873
Pt    0.4324    0.2532    0.3654
Pt    0.4288    0.1662    0.3633
Pt    0.4295    0.2534    0.3200
Pt    0.4723    0.0585    0.3397
Pt    0.4735    0.0581    0.3826
Pt    0.4704    0.1023    0.3367
Pt    0.4712    0.1008    0.3846
Pt    0.4729    0.1438    0.3849
Pt    0.4724    0.1833    0.2964
Pt    0.4718    0.1905    0.3469
Pt    0.4720    0.2293    0.2996
Pt    0.4716    0.2299    0.3432
Pt    0.4302    0.2542    0.2757
Pt    0.4285    0.2085    0.3643
Pt    0.4299    0.2099    0.3215
Pt    0.5138    0.1038    0.3372
Pt    0.4316    0.2077    0.2748
Pt    0.4276    0.1656    0.3193
Pt    0.4725    0.2545    0.3211
Pt    0.4296    0.1656    0.2770
Pt    0.4759    0.2506    0.2795
Pt    0.2760    0.2533    0.3835
Pt    0.2984    0.0362    0.2763
Pt    0.2992    0.0336    0.3206
Pt    0.2984    0.0768    0.2772
Pt    0.2968    0.0763    0.3207
Pt    0.2980    0.0773    0.3664
Pt    0.2987    0.1197    0.2759
Pt    0.2972    0.1228    0.3207
Pt    0.2963    0.1223    0.3632
Pt    0.2986    0.1653    0.2767
Pt    0.2985    0.1657    0.3202
Pt    0.2970    0.1697    0.3628
Pt    0.2982    0.2102    0.2759
Pt    0.2968    0.2111    0.3188
Pt    0.2992    0.2099    0.3639
Pt    0.2988    0.2527    0.2756
Pt    0.2970    0.2551    0.3199
Pt    0.2986    0.2529    0.3632
Pt    0.3434    0.0790    0.2753
Pt    0.3430    0.0769    0.3186
Pt    0.3381    0.0768    0.3637
Pt    0.3407    0.1205    0.2731
Pt    0.3433    0.1193    0.3177
Pt    0.3392    0.1205    0.3628
Pt    0.3432    0.1670    0.2761
Pt    0.3405    0.1639    0.3187
Pt    0.3414    0.1650    0.3636
Pt    0.3414    0.2111    0.2771
Pt    0.3418    0.2103    0.3226
Pt    0.3406    0.2099    0.3661
Pt    0.3414    0.2542    0.2756
Pt    0.3418    0.2553    0.3204
Pt    0.3411    0.2530    0.3655
Pt    0.3838    0.0379    0.3585
Pt    0.3848    0.0774    0.3210
Pt    0.3858    0.0765    0.3634
Pt    0.3860    0.1209    0.2736
Pt    0.3835    0.1227    0.3202
Pt    0.3831    0.1215    0.3619
Pt    0.3844    0.1655    0.2755
Pt    0.3866    0.1666    0.3176
Pt    0.3851    0.1677    0.3643
Pt    0.3865    0.2104    0.2757
Pt    0.3855    0.2082    0.3216
Pt    0.3873    0.2108    0.3643
Pt    0.3852    0.2542    0.2775
Pt    0.3858    0.2535    0.3217
Pt    0.3882    0.2528    0.3646
Pt    0.4297    0.0365    0.3610
Pt    0.4262    0.0790    0.3617
Pt    0.4293    0.1229    0.3203
Pt    0.4910    0.0158    0.3158
Pt    0.5145    0.0591    0.3382
Pt    0.5144    0.0363    0.3168
Pt    0.4270    0.0160    0.3397
Pt    0.3606    0.0161    0.3636
Pt    0.5130    0.0805    0.3598
Pt    0.5144    0.0569    0.2974
Pt    0.5133    0.2522    0.2779
Pt    0.5143    0.1246    0.3599
Pt    0.5140    0.1019    0.3814
Pt    0.5145    0.2315    0.3028
Pt    0.4898    0.0157    0.2767
Pt    0.4478    0.0145    0.3160
Pt    0.4062    0.0163    0.3601
Pt    0.5144    0.0164    0.2955
Pt    0.4930    0.0154    0.3618
Pt    0.4277    0.0153    0.3820
Pt    0.3801    0.0347    0.4489
Pt    0.2770    0.1416    0.4081
Pt    0.2755    0.1883    0.4084
Pt    0.2762    0.1865    0.4548
Pt    0.2764    0.2316    0.4089
Pt    0.2771    0.2323    0.4527
Pt    0.2783    0.2315    0.4945
Pt    0.4932    0.2121    0.5137
Pt    0.4037    0.1681    0.5141
Pt    0.3139    0.0578    0.4471
Pt    0.3153    0.0578    0.4930
Pt    0.3189    0.1004    0.4073
Pt    0.3191    0.1439    0.4100
Pt    0.3184    0.1444    0.4547
Pt    0.3177    0.1878    0.4070
Pt    0.3190    0.1873    0.4531
Pt    0.3184    0.2321    0.4085
Pt    0.3221    0.2325    0.4528
Pt    0.3208    0.2321    0.4941
Pt    0.5148    0.1667    0.4930
Pt    0.4726    0.2142    0.4892
Pt    0.5128    0.1911    0.4277
Pt    0.3604    0.0577    0.4050
Pt    0.3603    0.0560    0.4477
Pt    0.3565    0.0569    0.4937
Pt    0.3631    0.0993    0.4062
Pt    0.3579    0.0996    0.4507
Pt    0.3578    0.0997    0.4935
Pt    0.3618    0.1440    0.4096
Pt    0.3599    0.1451    0.4514
Pt    0.3609    0.1459    0.4945
Pt    0.3633    0.1875    0.4080
Pt    0.3627    0.1876    0.4523
Pt    0.3637    0.2322    0.4111
Pt    0.3616    0.2292    0.4507
Pt    0.5140    0.1005    0.4276
Pt    0.5150    0.0150    0.4283
Pt    0.4688    0.0160    0.5140
Pt    0.4038    0.0544    0.4042
Pt    0.4024    0.0553    0.4483
Pt    0.4015    0.0589    0.4932
Pt    0.4039    0.1010    0.4070
Pt    0.4050    0.0990    0.4503
Pt    0.4018    0.1016    0.4948
Pt    0.4045    0.1440    0.4069
Pt    0.4042    0.1447    0.4523
Pt    0.4050    0.1457    0.4941
Pt    0.4053    0.1892    0.4080
Pt    0.4079    0.1877    0.4502
Pt    0.4094    0.2328    0.4081
Pt    0.2992    0.2547    0.4526
Pt    0.4721    0.2113    0.4487
Pt    0.5135    0.0375    0.4506
Pt    0.4500    0.0588    0.4038
Pt    0.4493    0.0560    0.4490
Pt    0.4457    0.0592    0.4924
Pt    0.4496    0.1017    0.4067
Pt    0.4472    0.1015    0.4476
Pt    0.4479    0.1023    0.4924
Pt    0.4497    0.1443    0.4045
Pt    0.4464    0.1433    0.4484
Pt    0.4496    0.1472    0.4929
Pt    0.4502    0.1878    0.4044
Pt    0.4524    0.1902    0.4514
Pt    0.4499    0.1894    0.4944
Pt    0.5138    0.0597    0.4272
Pt    0.5142    0.0789    0.4056
Pt    0.4716    0.1666    0.4916
Pt    0.4927    0.0606    0.4047
Pt    0.4923    0.0592    0.4488
Pt    0.4928    0.0588    0.4948
Pt    0.4908    0.1019    0.4057
Pt    0.4921    0.1029    0.4501
Pt    0.4934    0.1031    0.4942
Pt    0.4932    0.1424    0.4067
Pt    0.4909    0.1468    0.4472
Pt    0.4927    0.1440    0.4916
Pt    0.4922    0.1898    0.4481
Pt    0.4948    0.1911    0.4919
Pt    0.4927    0.2350    0.4921
Pt    0.4270    0.1241    0.4932
Pt    0.2764    0.1659    0.4304
Pt    0.2752    0.2092    0.4302
Pt    0.2764    0.2103    0.4734
Pt    0.2784    0.2551    0.4329
Pt    0.2767    0.2549    0.4751
Pt    0.4252    0.1211    0.4516
Pt    0.3102    0.0378    0.4687
Pt    0.4254    0.1217    0.4053
Pt    0.3183    0.0781    0.4683
Pt    0.4224    0.0800    0.4934
Pt    0.3203    0.1231    0.4332
Pt    0.3187    0.1670    0.4305
Pt    0.3206    0.2093    0.4300
Pt    0.3204    0.2096    0.4742
Pt    0.3197    0.2537    0.4319
Pt    0.3206    0.2555    0.4729
Pt    0.3587    0.0349    0.4246
Pt    0.3561    0.0342    0.4700
Pt    0.2972    0.2537    0.4096
Pt    0.3617    0.0771    0.4267
Pt    0.3578    0.0779    0.4702
Pt    0.4271    0.0792    0.4499
Pt    0.3604    0.1214    0.4304
Pt    0.3584    0.1212    0.4739
Pt    0.5132    0.0349    0.4046
Pt    0.3611    0.1664    0.4307
Pt    0.3613    0.1670    0.4733
Pt    0.4280    0.0788    0.4061
Pt    0.3643    0.2093    0.4306
Pt    0.3650    0.2555    0.4318
Pt    0.4040    0.0341    0.4266
Pt    0.4026    0.0329    0.4700
Pt    0.4531    0.2128    0.5118
Pt    0.4044    0.0785    0.4277
Pt    0.4021    0.0761    0.4710
Pt    0.2970    0.2097    0.4939
Pt    0.4039    0.1224    0.4289
Pt    0.4039    0.1208    0.4733
Pt    0.4723    0.2349    0.5144
Pt    0.4060    0.1667    0.4289
Pt    0.4055    0.1694    0.4744
Pt    0.5131    0.0809    0.4944
Pt    0.4112    0.2102    0.4309
Pt    0.4491    0.0326    0.4268
Pt    0.4475    0.0369    0.4707
Pt    0.3345    0.0357    0.4925
Pt    0.4491    0.0796    0.4275
Pt    0.4486    0.0793    0.4701
Pt    0.4234    0.0368    0.4920
Pt    0.4488    0.1220    0.4267
Pt    0.4472    0.1225    0.4711
Pt    0.2975    0.1655    0.4517
Pt    0.4480    0.1661    0.4282
Pt    0.4481    0.1686    0.4726
Pt    0.4245    0.0354    0.4498
Pt    0.4489    0.2100    0.4702
Pt    0.4264    0.0355    0.4060
Pt    0.4926    0.0369    0.4274
Pt    0.4898    0.0371    0.4721
Pt    0.4923    0.0147    0.4494
Pt    0.4903    0.0794    0.4273
Pt    0.4921    0.0799    0.4705
Pt    0.2965    0.2091    0.4520
Pt    0.4931    0.1229    0.4287
Pt    0.4902    0.1233    0.4702
Pt    0.5117    0.1683    0.4045
Pt    0.4924    0.1665    0.4267
Pt    0.4922    0.1673    0.4715
Pt    0.3372    0.0786    0.4933
Pt    0.4938    0.2147    0.4691
Pt    0.3871    0.2536    0.4072
Pt    0.3869    0.2063    0.4504
Pt    0.4689    0.1660    0.4485
Pt    0.4734    0.1678    0.4047
Pt    0.3843    0.2124    0.4089
Pt    0.2975    0.1431    0.4312
Pt    0.2962    0.1872    0.4314
Pt    0.2988    0.1887    0.4741
Pt    0.2987    0.2317    0.4313
Pt    0.3004    0.2319    0.4739
Pt    0.3389    0.1660    0.4085
Pt    0.4704    0.1240    0.4924
Pt    0.2970    0.2102    0.4099
Pt    0.4694    0.1234    0.4500
Pt    0.3385    0.0559    0.4256
Pt    0.3371    0.0567    0.4701
Pt    0.3396    0.1228    0.4525
Pt    0.3405    0.1013    0.4289
Pt    0.3354    0.1013    0.4709
Pt    0.3812    0.1700    0.4960
Pt    0.3403    0.1423    0.4301
Pt    0.3405    0.1886    0.4308
Pt    0.3405    0.1868    0.4736
Pt    0.3408    0.2308    0.4309
Pt    0.3419    0.2336    0.4755
Pt    0.3822    0.0338    0.4060
Pt    0.4701    0.1224    0.4044
Pt    0.4698    0.0813    0.4946
Pt    0.3839    0.0556    0.4261
Pt    0.3807    0.0528    0.4708
Pt    0.3860    0.1673    0.4531
Pt    0.3820    0.1006    0.4297
Pt    0.3829    0.0992    0.4714
Pt    0.3407    0.2115    0.4084
Pt    0.3825    0.1437    0.4300
Pt    0.3839    0.1462    0.4742
Pt    0.3840    0.1647    0.4094
Pt    0.3843    0.1864    0.4293
Pt    0.3869    0.2304    0.4325
Pt    0.4702    0.0797    0.4473
Pt    0.4701    0.0803    0.4064
Pt    0.4697    0.0385    0.4943
Pt    0.4285    0.0580    0.4249
Pt    0.4257    0.0583    0.4714
Pt    0.3821    0.1251    0.4935
Pt    0.4252    0.0975    0.4268
Pt    0.4254    0.0994    0.4726
Pt    0.3811    0.1225    0.4528
Pt    0.4267    0.1428    0.4266
Pt    0.4270    0.1449    0.4711
Pt    0.3388    0.0786    0.4471
Pt    0.4310    0.1880    0.4296
Pt    0.4275    0.1908    0.4727
Pt    0.3835    0.1223    0.4073
Pt    0.4697    0.0351    0.4488
Pt    0.4728    0.0350    0.4056
Pt    0.4313    0.2108    0.4096
Pt    0.4700    0.0556    0.4264
Pt    0.4697    0.0571    0.4737
Pt    0.3796    0.0781    0.4948
Pt    0.4711    0.1021    0.4278
Pt    0.4707    0.1007    0.4722
Pt    0.3816    0.0762    0.4492
Pt    0.4699    0.1460    0.4266
Pt    0.4687    0.1459    0.4689
Pt    0.3848    0.0777    0.4046
Pt    0.4720    0.1884    0.4261
Pt    0.4741    0.1904    0.4709
Pt    0.3444    0.2531    0.4518
Pt    0.3794    0.0350    0.4931
Pt    0.4265    0.1685    0.4942
Pt    0.4271    0.1653    0.4497
Pt    0.4268    0.1670    0.4055
Pt    0.3408    0.2539    0.4090
Pt    0.2964    0.1650    0.4092
Pt    0.3408    0.2093    0.4534
Pt    0.3347    0.0373    0.4481
Pt    0.3398    0.1649    0.4514
Pt    0.5142    0.1016    0.4720
Pt    0.4471    0.0817    0.5146
Pt    0.3408    0.0802    0.4077
Pt    0.3359    0.1007    0.5146
Pt    0.2987    0.2555    0.4955
Pt    0.4450    0.0164    0.4919
Pt    0.3402    0.1234    0.4081
Pt    0.2994    0.1238    0.4084
Pt    0.4934    0.0371    0.5144
Pt    0.2880    0.0380    0.4907
Pt    0.4908    0.0157    0.4927
Pt    0.3351    0.0148    0.4683
Pt    0.3581    0.0368    0.5139
Pt    0.5143    0.1211    0.4508
Pt    0.2765    0.2540    0.5144
Pt    0.5145    0.1450    0.4717
Pt    0.5123    0.1902    0.4690
Pt    0.4914    0.2555    0.5128
Pt    0.5150    0.0800    0.4504
Pt    0.5133    0.1451    0.4276
Pt    0.2947    0.0590    0.5115
Pt    0.5133    0.1226    0.4043
Pt    0.5129    0.0580    0.4711
Pt    0.5140    0.0146    0.4710
Pt    0.4055    0.1256    0.5145
Pt    0.4025    0.0378    0.5142
Pt    0.4468    0.0375    0.5143
Pt    0.4733    0.1886    0.5119
Pt    0.5132    0.0357    0.4922
Pt    0.4464    0.0146    0.4506
Pt    0.3570    0.1225    0.5121
Pt    0.5129    0.2558    0.4901
Pt    0.3135    0.0354    0.5137
Pt    0.3363    0.0579    0.5141
Pt    0.4240    0.0584    0.5144
Pt    0.4704    0.0589    0.5138
Pt    0.4941    0.1242    0.5143
Pt    0.5140    0.1898    0.5135
Pt    0.4689    0.1046    0.5145
Pt    0.4261    0.1040    0.5145
Pt    0.3807    0.0576    0.5147
Pt    0.3152    0.0798    0.5143
Pt    0.4035    0.0153    0.5793
Pt    0.2738    0.0589    0.5380
Pt    0.2752    0.1446    0.6208
Pt    0.2769    0.1860    0.5776
Pt    0.2767    0.1900    0.6229
Pt    0.2762    0.2294    0.5334
Pt    0.2759    0.2324    0.5783
Pt    0.2759    0.2335    0.6222
Pt    0.4265    0.1257    0.5382
Pt    0.4732    0.1436    0.5157
Pt    0.3143    0.0558    0.5362
Pt    0.3153    0.0576    0.5809
Pt    0.3108    0.1028    0.5370
Pt    0.3164    0.1019    0.5789
Pt    0.3199    0.0988    0.6252
Pt    0.3180    0.1463    0.6211
Pt    0.3208    0.1898    0.5787
Pt    0.3182    0.1880    0.6222
Pt    0.3223    0.2303    0.5779
Pt    0.3219    0.2326    0.6204
Pt    0.5143    0.1905    0.6024
Pt    0.5144    0.1713    0.6252
Pt    0.4740    0.0812    0.5799
Pt    0.3573    0.0581    0.5362
Pt    0.3598    0.0565    0.5797
Pt    0.3597    0.0567    0.6242
Pt    0.3572    0.1022    0.5374
Pt    0.3585    0.1012    0.5801
Pt    0.3617    0.1001    0.6224
Pt    0.3592    0.1434    0.5370
Pt    0.3603    0.1454    0.5781
Pt    0.3605    0.1434    0.6195
Pt    0.3661    0.1927    0.5788
Pt    0.3642    0.1907    0.6220
Pt    0.3626    0.2323    0.6243
Pt    0.4700    0.0809    0.5362
Pt    0.4263    0.0806    0.5813
Pt    0.4704    0.2546    0.5344
Pt    0.4040    0.0590    0.5376
Pt    0.4028    0.0569    0.5796
Pt    0.4041    0.0559    0.6253
Pt    0.4055    0.1039    0.5380
Pt    0.4055    0.1003    0.5808
Pt    0.4036    0.1034    0.6220
Pt    0.4028    0.1468    0.5370
Pt    0.4062    0.1463    0.5811
Pt    0.4066    0.1450    0.6232
Pt    0.4077    0.1887    0.5359
Pt    0.4005    0.1931    0.5761
Pt    0.4081    0.1891    0.6257
Pt    0.4092    0.2313    0.6226
Pt    0.4730    0.2105    0.5776
Pt    0.4714    0.0350    0.6233
Pt    0.4714    0.2110    0.5350
Pt    0.4488    0.0604    0.5362
Pt    0.4493    0.0595    0.5798
Pt    0.4477    0.0570    0.6244
Pt    0.4467    0.1032    0.5355
Pt    0.4486    0.1021    0.5800
Pt    0.4493    0.1009    0.6260
Pt    0.4499    0.1458    0.5369
Pt    0.4476    0.1486    0.5810
Pt    0.4499    0.1453    0.6232
Pt    0.4514    0.1893    0.5361
Pt    0.4480    0.1886    0.5795
Pt    0.4518    0.1894    0.6219
Pt    0.4514    0.2317    0.5352
Pt    0.4502    0.2316    0.5787
Pt    0.4713    0.1669    0.6248
Pt    0.4739    0.1679    0.5794
Pt    0.4720    0.1668    0.5358
Pt    0.4921    0.0586    0.5357
Pt    0.4938    0.0582    0.5815
Pt    0.4935    0.0583    0.6225
Pt    0.4935    0.1013    0.5369
Pt    0.4921    0.1056    0.5811
Pt    0.4944    0.1022    0.6245
Pt    0.4929    0.1448    0.5361
Pt    0.4917    0.1437    0.5817
Pt    0.4949    0.1459    0.6237
Pt    0.4936    0.1898    0.5364
Pt    0.4956    0.1909    0.5798
Pt    0.4904    0.1892    0.6245
Pt    0.4933    0.2360    0.5351
Pt    0.4933    0.2360    0.5789
Pt    0.2716    0.0370    0.5587
Pt    0.2763    0.1668    0.5990
Pt    0.2750    0.2111    0.5565
Pt    0.2784    0.2099    0.5975
Pt    0.2759    0.2535    0.5539
Pt    0.2748    0.2537    0.5988
Pt    0.3146    0.0364    0.5581
Pt    0.3148    0.0342    0.6021
Pt    0.3154    0.0806    0.5603
Pt    0.3142    0.0780    0.6027
Pt    0.3182    0.1234    0.5989
Pt    0.3167    0.1663    0.5991
Pt    0.3210    0.2109    0.6001
Pt    0.3216    0.2513    0.5560
Pt    0.3214    0.2558    0.5993
Pt    0.3579    0.0335    0.5560
Pt    0.3577    0.0345    0.6023
Pt    0.3578    0.0802    0.5581
Pt    0.3599    0.0776    0.6023
Pt    0.3599    0.1228    0.5587
Pt    0.3592    0.1224    0.5997
Pt    0.3622    0.1678    0.5579
Pt    0.3625    0.1672    0.5992
Pt    0.3638    0.2112    0.6012
Pt    0.3661    0.2516    0.5999
Pt    0.4029    0.0366    0.5578
Pt    0.4032    0.0358    0.6020
Pt    0.4035    0.0804    0.5585
Pt    0.4052    0.0782    0.6027
Pt    0.4029    0.1245    0.5597
Pt    0.4052    0.1256    0.6012
Pt    0.4036    0.1682    0.5576
Pt    0.4085    0.1698    0.6031
Pt    0.4087    0.2079    0.6025
Pt    0.4470    0.0376    0.5596
Pt    0.4491    0.0357    0.6044
Pt    0.4476    0.0800    0.5583
Pt    0.4502    0.0796    0.6026
Pt    0.4476    0.1241    0.5585
Pt    0.4486    0.1230    0.6039
Pt    0.4486    0.1692    0.5557
Pt    0.4514    0.1670    0.6027
Pt    0.4514    0.2118    0.5573
Pt    0.4502    0.2133    0.5992
Pt    0.4904    0.0374    0.5590
Pt    0.4938    0.0361    0.6019
Pt    0.4940    0.0806    0.5589
Pt    0.4937    0.0805    0.6032
Pt    0.4931    0.1268    0.5599
Pt    0.4928    0.1234    0.6039
Pt    0.4932    0.1650    0.5574
Pt    0.4936    0.1675    0.6026
Pt    0.4948    0.2126    0.5567
Pt    0.4927    0.2115    0.6014
Pt    0.4945    0.2572    0.5576
Pt    0.4697    0.0378    0.5801
Pt    0.2941    0.0592    0.5606
Pt    0.2961    0.1022    0.6025
Pt    0.2961    0.1447    0.5998
Pt    0.2995    0.1889    0.5982
Pt    0.2980    0.2321    0.5553
Pt    0.3003    0.2314    0.5975
Pt    0.4717    0.1241    0.6254
Pt    0.4258    0.0795    0.6237
Pt    0.3354    0.0571    0.5582
Pt    0.3370    0.0557    0.6016
Pt    0.3342    0.1045    0.5556
Pt    0.3379    0.0992    0.6024
Pt    0.3381    0.1464    0.6003
Pt    0.3417    0.1898    0.6017
Pt    0.3434    0.2335    0.5991
Pt    0.4691    0.0387    0.5361
Pt    0.4684    0.1252    0.5813
Pt    0.3799    0.0572    0.5582
Pt    0.3809    0.0582    0.6014
Pt    0.3793    0.1012    0.5581
Pt    0.3820    0.0997    0.5999
Pt    0.3822    0.1454    0.5569
Pt    0.3825    0.1457    0.5992
Pt    0.3847    0.1889    0.6006
Pt    0.3878    0.2305    0.6010
Pt    0.4232    0.0822    0.5368
Pt    0.4292    0.2080    0.6255
Pt    0.4263    0.0590    0.5601
Pt    0.4250    0.0573    0.6026
Pt    0.4274    0.1033    0.5589
Pt    0.4274    0.1006    0.6019
Pt    0.4251    0.1447    0.5601
Pt    0.4266    0.1467    0.6006
Pt    0.4269    0.1908    0.5587
Pt    0.4305    0.1893    0.6024
Pt    0.4264    0.2306    0.5979
Pt    0.4267    0.2119    0.5779
Pt    0.4307    0.2122    0.5356
Pt    0.4698    0.0584    0.5592
Pt    0.4723    0.0570    0.6036
Pt    0.4717    0.1020    0.5600
Pt    0.4705    0.1030    0.6040
Pt    0.4703    0.1459    0.5590
Pt    0.4715    0.1466    0.6025
Pt    0.4715    0.1883    0.5584
Pt    0.4705    0.1886    0.6002
Pt    0.4723    0.2335    0.5570
Pt    0.4730    0.1229    0.5370
Pt    0.4692    0.0794    0.6245
Pt    0.4293    0.1674    0.6251
Pt    0.4265    0.0345    0.6244
Pt    0.4246    0.1707    0.5790
Pt    0.4265    0.1666    0.5374
Pt    0.4265    0.0369    0.5815
Pt    0.3857    0.2521    0.6214
Pt    0.4262    0.1237    0.6256
Pt    0.4270    0.1236    0.5808
Pt    0.4284    0.0402    0.5383
Pt    0.2893    0.0364    0.5303
Pt    0.2950    0.0345    0.5781
Pt    0.2934    0.0781    0.5367
Pt    0.2953    0.0802    0.5805
Pt    0.2966    0.1247    0.6230
Pt    0.2964    0.1666    0.6220
Pt    0.3000    0.2094    0.5745
Pt    0.2990    0.2136    0.6205
Pt    0.3015    0.2515    0.5343
Pt    0.2990    0.2527    0.5774
Pt    0.2975    0.2556    0.6207
Pt    0.3363    0.0348    0.5345
Pt    0.3376    0.0349    0.5804
Pt    0.3367    0.0350    0.6240
Pt    0.3339    0.0808    0.5370
Pt    0.3379    0.0785    0.5811
Pt    0.3376    0.0756    0.6238
Pt    0.3382    0.1250    0.5342
Pt    0.3363    0.1261    0.5770
Pt    0.3390    0.1232    0.6203
Pt    0.3407    0.1677    0.5782
Pt    0.3414    0.1671    0.6227
Pt    0.3438    0.2105    0.5773
Pt    0.3400    0.2105    0.6230
Pt    0.3459    0.2550    0.5771
Pt    0.3417    0.2553    0.6209
Pt    0.3809    0.0360    0.5363
Pt    0.3800    0.0347    0.5799
Pt    0.3806    0.0359    0.6230
Pt    0.3815    0.0808    0.5359
Pt    0.3801    0.0793    0.5794
Pt    0.3828    0.0780    0.6231
Pt    0.3810    0.1230    0.5355
Pt    0.3830    0.1233    0.5795
Pt    0.3822    0.1218    0.6216
Pt    0.3813    0.1704    0.5364
Pt    0.3855    0.1676    0.5796
Pt    0.3854    0.1677    0.6217
Pt    0.3856    0.2103    0.6227
Pt    0.4699    0.0149    0.5999
Pt    0.3109    0.0145    0.5337
Pt    0.2913    0.0178    0.5538
Pt    0.4897    0.0166    0.5356
Pt    0.4283    0.1899    0.5166
Pt    0.5146    0.0803    0.5360
Pt    0.4260    0.0148    0.6019
Pt    0.4033    0.0170    0.5354
Pt    0.4256    0.1455    0.5159
Pt    0.5136    0.0371    0.5361
Pt    0.4041    0.0145    0.6232
Pt    0.3583    0.1649    0.5166
Pt    0.4673    0.0150    0.5584
Pt    0.5144    0.1256    0.5824
Pt    0.3812    0.1458    0.5155
Pt    0.4509    0.1666    0.5151
Pt    0.5141    0.1679    0.5365
Pt    0.5149    0.2126    0.5355
Pt    0.5149    0.1043    0.5608
Pt    0.4012    0.0800    0.5153
Pt    0.3593    0.0782    0.5166
Pt    0.4487    0.1264    0.5158
Pt    0.5134    0.0574    0.5574
Pt    0.4234    0.0147    0.5582
Pt    0.5131    0.0343    0.5796
Pt    0.4441    0.0148    0.5357
Pt    0.4946    0.1679    0.5153
Pt    0.3795    0.1010    0.5167
Pt    0.4921    0.0813    0.5164
Pt    0.2994    0.2309    0.5152
Pt    0.4214    0.0727    0.7139
Pt    0.2760    0.0570    0.7085
Pt    0.2749    0.0563    0.7487
Pt    0.2770    0.0979    0.6637
Pt    0.2775    0.1006    0.7077
Pt    0.2749    0.0997    0.7523
Pt    0.2750    0.1453    0.6640
Pt    0.2763    0.1421    0.7093
Pt    0.2762    0.1440    0.7526
Pt    0.2738    0.1870    0.6657
Pt    0.2763    0.1851    0.7086
Pt    0.2737    0.1860    0.7542
Pt    0.2770    0.2316    0.6653
Pt    0.2759    0.2305    0.7096
Pt    0.2766    0.2283    0.7536
Pt    0.3176    0.0586    0.7518
Pt    0.3177    0.1005    0.6647
Pt    0.3187    0.0981    0.7108
Pt    0.3198    0.1008    0.7533
Pt    0.3179    0.1446    0.6659
Pt    0.3203    0.1426    0.7079
Pt    0.3201    0.1434    0.7548
Pt    0.3197    0.1881    0.6661
Pt    0.3215    0.1885    0.7100
Pt    0.3188    0.1867    0.7532
Pt    0.3201    0.2327    0.6670
Pt    0.3211    0.2313    0.7110
Pt    0.3195    0.2308    0.7532
Pt    0.4299    0.1649    0.6680
Pt    0.3597    0.0565    0.6672
Pt    0.3633    0.1028    0.6673
Pt    0.3635    0.0990    0.7100
Pt    0.3627    0.1001    0.7537
Pt    0.3632    0.1443    0.6649
Pt    0.3660    0.1422    0.7110
Pt    0.3628    0.1410    0.7543
Pt    0.3636    0.1880    0.6681
Pt    0.3625    0.1871    0.7112
Pt    0.3636    0.1868    0.7530
Pt    0.3658    0.2296    0.6659
Pt    0.3668    0.2308    0.7112
Pt    0.3651    0.2338    0.7529
Pt    0.3617    0.0167    0.6665
Pt    0.4053    0.0584    0.6674
Pt    0.4060    0.1012    0.6671
Pt    0.4052    0.0976    0.7111
Pt    0.4082    0.1435    0.6680
Pt    0.4047    0.1449    0.7107
Pt    0.4077    0.1435    0.7554
Pt    0.4069    0.1873    0.6669
Pt    0.4084    0.1881    0.7101
Pt    0.4084    0.1885    0.7544
Pt    0.4097    0.2319    0.6652
Pt    0.4107    0.2292    0.7087
Pt    0.4082    0.2316    0.7540
Pt    0.4334    0.2527    0.7558
Pt    0.4321    0.2538    0.7105
Pt    0.4488    0.0575    0.6696
Pt    0.4503    0.0585    0.7117
Pt    0.4500    0.1016    0.6696
Pt    0.4511    0.1028    0.7143
Pt    0.4529    0.1446    0.6691
Pt    0.4539    0.1886    0.6657
Pt    0.4532    0.1881    0.7082
Pt    0.4539    0.1822    0.7499
Pt    0.4511    0.2314    0.7102
Pt    0.4536    0.2298    0.7518
Pt    0.4725    0.0808    0.7124
Pt    0.4318    0.2525    0.6637
Pt    0.4282    0.0808    0.6705
Pt    0.4948    0.0561    0.6700
Pt    0.4925    0.0591    0.7134
Pt    0.4915    0.0562    0.7541
Pt    0.4930    0.1009    0.6675
Pt    0.4977    0.1028    0.7123
Pt    0.4942    0.1458    0.6678
Pt    0.4940    0.2266    0.7497
Pt    0.2737    0.0364    0.7267
Pt    0.2791    0.0758    0.6831
Pt    0.2764    0.0792    0.7302
Pt    0.2767    0.1223    0.6442
Pt    0.2760    0.1226    0.6864
Pt    0.2758    0.1218    0.7305
Pt    0.2760    0.1666    0.6418
Pt    0.2760    0.1648    0.6867
Pt    0.2740    0.1655    0.7318
Pt    0.2757    0.2109    0.6435
Pt    0.2763    0.2085    0.6886
Pt    0.2768    0.2067    0.7315
Pt    0.2966    0.1883    0.6450
Pt    0.2769    0.2533    0.6889
Pt    0.2758    0.2527    0.7319
Pt    0.3160    0.0760    0.6828
Pt    0.3237    0.0770    0.7300
Pt    0.3192    0.1238    0.6413
Pt    0.3185    0.1204    0.6888
Pt    0.3203    0.1216    0.7318
Pt    0.3194    0.1678    0.6441
Pt    0.3218    0.1658    0.6885
Pt    0.3199    0.1643    0.7318
Pt    0.3174    0.2110    0.6445
Pt    0.3221    0.2104    0.6877
Pt    0.3214    0.2096    0.7313
Pt    0.3206    0.2537    0.6431
Pt    0.3216    0.2524    0.6886
Pt    0.3217    0.2529    0.7328
Pt    0.3594    0.0347    0.6454
Pt    0.3621    0.0796    0.6455
Pt    0.3634    0.0790    0.6867
Pt    0.3625    0.1216    0.6453
Pt    0.3634    0.1222    0.6882
Pt    0.3624    0.1224    0.7321
Pt    0.3629    0.1671    0.6423
Pt    0.3638    0.1640    0.6883
Pt    0.3654    0.1651    0.7311
Pt    0.3648    0.2102    0.6441
Pt    0.3649    0.2097    0.6892
Pt    0.3628    0.2103    0.7326
Pt    0.3625    0.2534    0.6444
Pt    0.3645    0.2528    0.6881
Pt    0.3671    0.2542    0.7312
Pt    0.4033    0.0347    0.6494
Pt    0.4046    0.0384    0.6908
Pt    0.4054    0.0799    0.6461
Pt    0.3995    0.0740    0.6938
Pt    0.4062    0.1220    0.6463
Pt    0.4067    0.1226    0.6897
Pt    0.4076    0.1193    0.7363
Pt    0.4047    0.1655    0.6447
Pt    0.4078    0.1671    0.6898
Pt    0.4097    0.1667    0.7314
Pt    0.4062    0.2090    0.6464
Pt    0.4111    0.2079    0.6864
Pt    0.4105    0.2099    0.7341
Pt    0.4070    0.2529    0.6431
Pt    0.4107    0.2535    0.6880
Pt    0.4104    0.2537    0.7298
Pt    0.4474    0.0365    0.6470
Pt    0.4484    0.0366    0.6898
Pt    0.4449    0.0367    0.7316
Pt    0.4512    0.0783    0.6477
Pt    0.4507    0.0827    0.6925
Pt    0.4453    0.0792    0.7302
Pt    0.4519    0.1237    0.6474
Pt    0.4500    0.1223    0.6905
Pt    0.4495    0.1660    0.6461
Pt    0.4526    0.1666    0.6879
Pt    0.4530    0.2122    0.6862
Pt    0.4513    0.2069    0.7333
Pt    0.4522    0.2520    0.6880
Pt    0.4529    0.2518    0.7324
Pt    0.4938    0.0349    0.6458
Pt    0.4943    0.0352    0.6905
Pt    0.4927    0.0340    0.7336
Pt    0.4918    0.0776    0.6464
Pt    0.4942    0.0801    0.6932
Pt    0.4899    0.0794    0.7337
Pt    0.4935    0.1245    0.6470
Pt    0.4949    0.1220    0.6890
Pt    0.4935    0.1694    0.6464
Pt    0.4965    0.2530    0.7268
Pt    0.4699    0.0792    0.6691
Pt    0.2981    0.0576    0.7303
Pt    0.2976    0.0990    0.6428
Pt    0.2980    0.0994    0.6863
Pt    0.2986    0.1011    0.7304
Pt    0.2973    0.1470    0.6443
Pt    0.2969    0.1434    0.6863
Pt    0.2994    0.1443    0.7307
Pt    0.5150    0.1660    0.6685
Pt    0.2989    0.1870    0.6875
Pt    0.3003    0.1857    0.7299
Pt    0.3000    0.2325    0.6440
Pt    0.2994    0.2315    0.6883
Pt    0.2982    0.2278    0.7311
Pt    0.3398    0.1015    0.6467
Pt    0.3419    0.1000    0.6867
Pt    0.3415    0.0999    0.7312
Pt    0.3423    0.1435    0.6423
Pt    0.3421    0.1443    0.6859
Pt    0.3428    0.1432    0.7321
Pt    0.3420    0.1895    0.6440
Pt    0.3434    0.1872    0.6899
Pt    0.3410    0.1876    0.7320
Pt    0.5147    0.0605    0.7346
Pt    0.3443    0.2314    0.6900
Pt    0.3441    0.2323    0.7325
Pt    0.4253    0.1217    0.7113
Pt    0.3825    0.0570    0.6458
Pt    0.3830    0.1011    0.6443
Pt    0.3851    0.1003    0.6883
Pt    0.3863    0.0977    0.7331
Pt    0.3823    0.1432    0.6416
Pt    0.3857    0.1440    0.6884
Pt    0.3865    0.1418    0.7318
Pt    0.3843    0.1892    0.6467
Pt    0.3857    0.1872    0.6889
Pt    0.3853    0.1893    0.7324
Pt    0.3857    0.2315    0.6444
Pt    0.3881    0.2330    0.6858
Pt    0.3876    0.2313    0.7307
Pt    0.4772    0.2509    0.7506
Pt    0.4274    0.1220    0.6676
Pt    0.4253    0.0577    0.6448
Pt    0.4269    0.0600    0.6885
Pt    0.4285    0.1011    0.6466
Pt    0.4274    0.1005    0.6919
Pt    0.4260    0.0991    0.7316
Pt    0.4307    0.1439    0.6461
Pt    0.4310    0.1429    0.6888
Pt    0.4285    0.1412    0.7310
Pt    0.4283    0.1886    0.6473
Pt    0.4343    0.1888    0.6862
Pt    0.4317    0.1844    0.7293
Pt    0.4724    0.0155    0.6466
Pt    0.4319    0.2327    0.6858
Pt    0.4294    0.2305    0.7309
Pt    0.4330    0.2062    0.7547
Pt    0.4741    0.2514    0.7112
Pt    0.4313    0.2084    0.7085
Pt    0.4705    0.0547    0.6463
Pt    0.4721    0.0572    0.6897
Pt    0.4699    0.0573    0.7343
Pt    0.4734    0.1003    0.6467
Pt    0.4737    0.1025    0.6898
Pt    0.4735    0.1458    0.6436
Pt    0.4752    0.2247    0.7307
Pt    0.4747    0.2053    0.7536
Pt    0.4735    0.1659    0.6666
Pt    0.4733    0.1210    0.6679
Pt    0.4678    0.0359    0.7552
Pt    0.2767    0.2537    0.6433
Pt    0.4718    0.0366    0.7137
Pt    0.4336    0.2103    0.6648
Pt    0.4316    0.1631    0.7509
Pt    0.4300    0.1659    0.7073
Pt    0.4722    0.0353    0.6683
Pt    0.2961    0.0370    0.7520
Pt    0.2987    0.0777    0.7077
Pt    0.2978    0.0811    0.7515
Pt    0.2980    0.1242    0.6654
Pt    0.2981    0.1239    0.7092
Pt    0.2973    0.1224    0.7524
Pt    0.2972    0.1663    0.6678
Pt    0.2968    0.1644    0.7093
Pt    0.2986    0.1649    0.7532
Pt    0.2984    0.2103    0.6680
Pt    0.2981    0.2091    0.7091
Pt    0.2973    0.2076    0.7516
Pt    0.2987    0.2531    0.6651
Pt    0.2995    0.2506    0.7099
Pt    0.2967    0.2513    0.7530
Pt    0.3382    0.0782    0.6648
Pt    0.3384    0.0784    0.7054
Pt    0.3411    0.0791    0.7526
Pt    0.3379    0.1238    0.6657
Pt    0.3426    0.1209    0.7085
Pt    0.3410    0.1217    0.7546
Pt    0.3416    0.1675    0.6653
Pt    0.3423    0.1656    0.7105
Pt    0.3423    0.1665    0.7548
Pt    0.3412    0.2101    0.6664
Pt    0.3426    0.2094    0.7092
Pt    0.3417    0.2082    0.7544
Pt    0.3432    0.2515    0.6664
Pt    0.3451    0.2536    0.7122
Pt    0.3437    0.2541    0.7535
Pt    0.3827    0.0393    0.6684
Pt    0.3838    0.0811    0.6659
Pt    0.3855    0.1245    0.6652
Pt    0.3862    0.1190    0.7102
Pt    0.3846    0.1243    0.7550
Pt    0.3852    0.1652    0.6648
Pt    0.3859    0.1687    0.7111
Pt    0.3838    0.1642    0.7522
Pt    0.3867    0.2079    0.6675
Pt    0.3882    0.2101    0.7085
Pt    0.3858    0.2103    0.7543
Pt    0.3865    0.2538    0.6644
Pt    0.3892    0.2525    0.7081
Pt    0.3877    0.2540    0.7539
Pt    0.4264    0.0357    0.6695
Pt    0.4272    0.0387    0.7087
Pt    0.4295    0.2308    0.6421
Pt    0.4474    0.0154    0.7116
Pt    0.3426    0.2313    0.6447
Pt    0.2959    0.0158    0.7287
Pt    0.4508    0.0155    0.6677
Pt    0.4251    0.0158    0.6904
Pt    0.2749    0.0156    0.7515
Pt    0.5120    0.0793    0.6706
Pt    0.4012    0.0155    0.6719
Pt    0.5113    0.2524    0.7516
Pt    0.4670    0.0153    0.7339
Pt    0.4718    0.0150    0.6906
Pt    0.5141    0.0584    0.6471
Pt    0.4311    0.2107    0.8399
Pt    0.2753    0.0551    0.7980
Pt    0.2749    0.0546    0.8380
Pt    0.2742    0.0986    0.7975
Pt    0.2748    0.0995    0.8424
Pt    0.5146    0.1690    0.8855
Pt    0.2757    0.1445    0.7973
Pt    0.2754    0.1415    0.8408
Pt    0.5149    0.2533    0.7953
Pt    0.2751    0.1877    0.7964
Pt    0.2752    0.1886    0.8417
Pt    0.2754    0.1873    0.8873
Pt    0.2754    0.2308    0.7969
Pt    0.2744    0.2307    0.8421
Pt    0.2755    0.2309    0.8846
Pt    0.3182    0.0531    0.7939
Pt    0.3185    0.0564    0.8397
Pt    0.3198    0.0984    0.7990
Pt    0.3209    0.0974    0.8396
Pt    0.3196    0.0991    0.8828
Pt    0.3187    0.1440    0.7987
Pt    0.3172    0.1432    0.8410
Pt    0.3203    0.1429    0.8848
Pt    0.3204    0.1876    0.7960
Pt    0.3205    0.1873    0.8414
Pt    0.3185    0.1862    0.8849
Pt    0.3182    0.2300    0.7986
Pt    0.3186    0.2328    0.8398
Pt    0.3189    0.2318    0.8836
Pt    0.2733    0.1414    0.8861
Pt    0.3621    0.0568    0.8376
Pt    0.3620    0.0584    0.8835
Pt    0.3622    0.0989    0.7953
Pt    0.3639    0.1008    0.8379
Pt    0.3621    0.1010    0.8820
Pt    0.3644    0.1446    0.7968
Pt    0.3620    0.1464    0.8400
Pt    0.3639    0.1459    0.8848
Pt    0.3642    0.1892    0.7972
Pt    0.3623    0.1881    0.8409
Pt    0.3638    0.1905    0.8861
Pt    0.3640    0.2292    0.7970
Pt    0.3618    0.2301    0.8406
Pt    0.3618    0.2314    0.8864
Pt    0.4716    0.2556    0.8430
Pt    0.4747    0.2536    0.7977
Pt    0.4046    0.0577    0.8384
Pt    0.4053    0.0580    0.8816
Pt    0.4074    0.0993    0.7958
Pt    0.4054    0.1003    0.8368
Pt    0.4064    0.1030    0.8855
Pt    0.4092    0.1449    0.7950
Pt    0.4075    0.1456    0.8392
Pt    0.4056    0.1428    0.8840
Pt    0.4099    0.1881    0.7974
Pt    0.4106    0.1884    0.8409
Pt    0.4084    0.1892    0.8827
Pt    0.4102    0.2342    0.7971
Pt    0.4075    0.2325    0.8404
Pt    0.4060    0.2304    0.8833
Pt    0.4728    0.2104    0.8411
Pt    0.4767    0.2067    0.7955
Pt    0.4517    0.0575    0.8361
Pt    0.4502    0.0573    0.8801
Pt    0.4483    0.0976    0.8372
Pt    0.4503    0.1022    0.8825
Pt    0.4526    0.1448    0.8401
Pt    0.4518    0.1441    0.8799
Pt    0.4545    0.1878    0.7981
Pt    0.4535    0.1868    0.8409
Pt    0.4535    0.1892    0.8833
Pt    0.4535    0.2316    0.7969
Pt    0.4522    0.2332    0.8400
Pt    0.4283    0.2542    0.8414
Pt    0.4723    0.1686    0.8852
Pt    0.4746    0.1652    0.8389
Pt    0.4940    0.0562    0.7923
Pt    0.4928    0.0557    0.8365
Pt    0.4938    0.0575    0.8816
Pt    0.4926    0.0992    0.8378
Pt    0.4926    0.1024    0.8812
Pt    0.4936    0.1458    0.8813
Pt    0.4941    0.2310    0.7989
Pt    0.2720    0.0382    0.7743
Pt    0.2757    0.0789    0.7730
Pt    0.2737    0.0765    0.8191
Pt    0.2741    0.0781    0.8647
Pt    0.2757    0.1216    0.7765
Pt    0.2760    0.1213    0.8190
Pt    0.2743    0.1203    0.8644
Pt    0.2757    0.1647    0.7747
Pt    0.2751    0.1644    0.8203
Pt    0.2748    0.1630    0.8665
Pt    0.2773    0.2093    0.7761
Pt    0.2733    0.2089    0.8195
Pt    0.2753    0.2086    0.8651
Pt    0.2729    0.2546    0.7752
Pt    0.2734    0.2522    0.8197
Pt    0.2771    0.2553    0.8639
Pt    0.3189    0.0358    0.8180
Pt    0.3173    0.0779    0.7735
Pt    0.3191    0.0745    0.8168
Pt    0.3175    0.0765    0.8614
Pt    0.3187    0.1237    0.7760
Pt    0.3174    0.1211    0.8204
Pt    0.3170    0.1199    0.8631
Pt    0.3186    0.1670    0.7760
Pt    0.3191    0.1658    0.8199
Pt    0.3189    0.1652    0.8642
Pt    0.3191    0.2091    0.7744
Pt    0.3163    0.2079    0.8213
Pt    0.3189    0.2112    0.8612
Pt    0.3212    0.2534    0.7759
Pt    0.3195    0.2515    0.8178
Pt    0.3190    0.2522    0.8618
Pt    0.3632    0.0368    0.8610
Pt    0.3616    0.0788    0.7741
Pt    0.3612    0.0767    0.8152
Pt    0.3638    0.0784    0.8604
Pt    0.3617    0.1219    0.7757
Pt    0.3622    0.1218    0.8165
Pt    0.3640    0.1230    0.8615
Pt    0.3647    0.1658    0.7750
Pt    0.3627    0.1680    0.8168
Pt    0.3620    0.1679    0.8619
Pt    0.3640    0.2083    0.7742
Pt    0.3617    0.2088    0.8190
Pt    0.3642    0.2095    0.8632
Pt    0.3659    0.2522    0.7761
Pt    0.3640    0.2536    0.8180
Pt    0.3638    0.2527    0.8642
Pt    0.4045    0.0347    0.8600
Pt    0.4089    0.0788    0.8584
Pt    0.4088    0.1192    0.7729
Pt    0.4061    0.1233    0.8143
Pt    0.4073    0.1223    0.8609
Pt    0.4094    0.1657    0.7728
Pt    0.4092    0.1664    0.8173
Pt    0.4071    0.1668    0.8607
Pt    0.4089    0.2084    0.7765
Pt    0.4090    0.2079    0.8193
Pt    0.4094    0.2107    0.8623
Pt    0.4101    0.2537    0.7760
Pt    0.4087    0.2541    0.8194
Pt    0.4061    0.2543    0.8641
Pt    0.4498    0.0339    0.8146
Pt    0.4512    0.0348    0.8594
Pt    0.4497    0.0793    0.8594
Pt    0.4514    0.1231    0.8600
Pt    0.4506    0.1672    0.7741
Pt    0.4550    0.1644    0.8150
Pt    0.4531    0.1670    0.8620
Pt    0.4529    0.2091    0.7758
Pt    0.4547    0.2103    0.8194
Pt    0.4527    0.2103    0.8634
Pt    0.4561    0.2526    0.7751
Pt    0.4515    0.2543    0.8187
Pt    0.4505    0.2507    0.8615
Pt    0.4914    0.0335    0.7730
Pt    0.4934    0.0337    0.8150
Pt    0.4925    0.0354    0.8595
Pt    0.4901    0.0781    0.8157
Pt    0.4935    0.0800    0.8610
Pt    0.4929    0.1211    0.8583
Pt    0.4939    0.1682    0.8630
Pt    0.4954    0.2113    0.8200
Pt    0.4940    0.2529    0.7767
Pt    0.2751    0.0982    0.8856
Pt    0.2961    0.0578    0.7724
Pt    0.2968    0.0566    0.8193
Pt    0.2964    0.1005    0.7768
Pt    0.2973    0.0948    0.8190
Pt    0.2967    0.0960    0.8638
Pt    0.2968    0.1425    0.7773
Pt    0.2968    0.1429    0.8196
Pt    0.2976    0.1409    0.8658
Pt    0.2961    0.1860    0.7743
Pt    0.2973    0.1864    0.8206
Pt    0.2961    0.1847    0.8634
Pt    0.2971    0.2326    0.7752
Pt    0.2952    0.2319    0.8200
Pt    0.2955    0.2310    0.8629
Pt    0.3399    0.0563    0.7706
Pt    0.3416    0.0540    0.8158
Pt    0.3401    0.0575    0.8629
Pt    0.3396    0.0996    0.7776
Pt    0.3420    0.0986    0.8173
Pt    0.3420    0.1006    0.8604
Pt    0.3430    0.1459    0.7774
Pt    0.3397    0.1432    0.8173
Pt    0.3394    0.1418    0.8604
Pt    0.3423    0.1874    0.7751
Pt    0.3393    0.1882    0.8197
Pt    0.3402    0.1875    0.8643
Pt    0.3405    0.2321    0.7740
Pt    0.3414    0.2315    0.8179
Pt    0.3414    0.2339    0.8629
Pt    0.4299    0.2111    0.8846
Pt    0.3858    0.0567    0.8600
Pt    0.3860    0.0998    0.7732
Pt    0.3832    0.0976    0.8153
Pt    0.3862    0.1011    0.8588
Pt    0.3850    0.1449    0.7746
Pt    0.3817    0.1430    0.8192
Pt    0.3858    0.1447    0.8605
Pt    0.3880    0.1865    0.7749
Pt    0.3839    0.1894    0.8183
Pt    0.3865    0.1891    0.8625
Pt    0.3876    0.2319    0.7763
Pt    0.3866    0.2304    0.8179
Pt    0.3849    0.2318    0.8609
Pt    0.4730    0.1235    0.8807
Pt    0.4270    0.0571    0.8598
Pt    0.4286    0.1012    0.8604
Pt    0.4313    0.1453    0.7756
Pt    0.4318    0.1436    0.8176
Pt    0.4276    0.1438    0.8595
Pt    0.4325    0.1886    0.7752
Pt    0.4326    0.1880    0.8198
Pt    0.4306    0.1888    0.8615
Pt    0.4309    0.2305    0.7743
Pt    0.4300    0.2325    0.8200
Pt    0.4316    0.2304    0.8619
Pt    0.4723    0.1216    0.8377
Pt    0.4705    0.0791    0.8821
Pt    0.4725    0.0552    0.8149
Pt    0.4703    0.0574    0.8571
Pt    0.4709    0.1008    0.8604
Pt    0.4752    0.1447    0.8594
Pt    0.4727    0.1869    0.7750
Pt    0.4756    0.1884    0.8206
Pt    0.4770    0.1894    0.8617
Pt    0.4760    0.2300    0.7745
Pt    0.4767    0.2334    0.8222
Pt    0.4703    0.0792    0.8383
Pt    0.4714    0.0358    0.8814
Pt    0.4708    0.0364    0.8370
Pt    0.4714    0.0332    0.7942
Pt    0.5140    0.1249    0.8816
Pt    0.4334    0.2539    0.7952
Pt    0.4298    0.2106    0.7985
Pt    0.4272    0.2523    0.8838
Pt    0.2953    0.0348    0.7962
Pt    0.2965    0.0766    0.7955
Pt    0.2966    0.0758    0.8419
Pt    0.2974    0.1197    0.7990
Pt    0.2997    0.1182    0.8415
Pt    0.2973    0.1210    0.8865
Pt    0.2976    0.1666    0.7980
Pt    0.2954    0.1637    0.8434
Pt    0.2970    0.1638    0.8869
Pt    0.2967    0.2081    0.7989
Pt    0.2955    0.2109    0.8424
Pt    0.2983    0.2091    0.8846
Pt    0.2964    0.2533    0.7980
Pt    0.2986    0.2537    0.8396
Pt    0.2973    0.2539    0.8844
Pt    0.3397    0.0751    0.7945
Pt    0.3420    0.0781    0.8400
Pt    0.3391    0.0780    0.8833
Pt    0.3393    0.1226    0.7964
Pt    0.3418    0.1215    0.8379
Pt    0.3428    0.1244    0.8821
Pt    0.3402    0.1687    0.7978
Pt    0.3400    0.1660    0.8401
Pt    0.3409    0.1664    0.8841
Pt    0.3399    0.2086    0.7967
Pt    0.3404    0.2100    0.8408
Pt    0.3409    0.2111    0.8822
Pt    0.3438    0.2534    0.7971
Pt    0.3433    0.2519    0.8395
Pt    0.3402    0.2525    0.8864
Pt    0.3819    0.0343    0.8836
Pt    0.3851    0.0799    0.8374
Pt    0.3870    0.0823    0.8829
Pt    0.3865    0.1212    0.7927
Pt    0.3854    0.1227    0.8397
Pt    0.3829    0.1236    0.8836
Pt    0.3873    0.1666    0.7970
Pt    0.3841    0.1687    0.8391
Pt    0.3857    0.1668    0.8826
Pt    0.3868    0.2097    0.7956
Pt    0.3867    0.2114    0.8390
Pt    0.3848    0.2106    0.8843
Pt    0.3851    0.2538    0.7979
Pt    0.3835    0.2522    0.8393
Pt    0.3849    0.2520    0.8840
Pt    0.4287    0.0369    0.8376
Pt    0.4260    0.0354    0.8843
Pt    0.4287    0.0769    0.8360
Pt    0.4282    0.0789    0.8833
Pt    0.4295    0.1223    0.7962
Pt    0.4267    0.1215    0.8353
Pt    0.4286    0.1246    0.8819
Pt    0.4313    0.1659    0.7973
Pt    0.4322    0.1648    0.8394
Pt    0.4291    0.1648    0.8817
Pt    0.5142    0.1252    0.8380
Pt    0.5147    0.1006    0.8581
Pt    0.2955    0.0157    0.7725
Pt    0.4283    0.0155    0.8618
Pt    0.3822    0.0151    0.8576
Pt    0.5146    0.0350    0.8381
Pt    0.5138    0.0566    0.8596
Pt    0.5139    0.0796    0.8367
Pt    0.2740    0.0144    0.7979
Pt    0.4093    0.0149    0.8380
Pt    0.5125    0.2306    0.7744
Pt    0.2774    0.1409    0.9334
Pt    0.2748    0.1885    0.9285
Pt    0.2755    0.1912    0.9714
Pt    0.2744    0.2334    0.9278
Pt    0.2770    0.2337    0.9731
Pt    0.4265    0.1253    0.9289
Pt    0.3155    0.0575    0.9694
Pt    0.3178    0.1445    0.9286
Pt    0.3199    0.1881    0.9299
Pt    0.3195    0.1869    0.9732
Pt    0.3191    0.2325    0.9282
Pt    0.3208    0.2358    0.9757
Pt    0.4279    0.0792    0.9705
Pt    0.4265    0.0795    0.9258
Pt    0.3609    0.0590    0.9256
Pt    0.3594    0.0562    0.9682
Pt    0.3606    0.1008    0.9265
Pt    0.3635    0.1005    0.9709
Pt    0.3624    0.1445    0.9283
Pt    0.3617    0.1451    0.9749
Pt    0.3619    0.1887    0.9310
Pt    0.3620    0.1883    0.9730
Pt    0.3635    0.2314    0.9309
Pt    0.4291    0.0339    0.9703
Pt    0.4279    0.0363    0.9264
Pt    0.4052    0.0569    0.9253
Pt    0.4069    0.0573    0.9701
Pt    0.4055    0.1024    0.9279
Pt    0.4066    0.1030    0.9710
Pt    0.4050    0.1461    0.9270
Pt    0.4058    0.1452    0.9708
Pt    0.4058    0.1875    0.9279
Pt    0.4049    0.1890    0.9732
Pt    0.4055    0.2313    0.9289
Pt    0.3887    0.2551    0.9290
Pt    0.3853    0.2087    0.9297
Pt    0.4490    0.0559    0.9250
Pt    0.4475    0.0578    0.9697
Pt    0.4478    0.1032    0.9250
Pt    0.4491    0.1012    0.9702
Pt    0.4492    0.1443    0.9273
Pt    0.4480    0.1459    0.9729
Pt    0.4466    0.1931    0.9256
Pt    0.4482    0.1924    0.9695
Pt    0.3846    0.1658    0.9721
Pt    0.3828    0.1673    0.9283
Pt    0.4953    0.0571    0.9239
Pt    0.4936    0.0587    0.9708
Pt    0.4951    0.1009    0.9267
Pt    0.4944    0.1023    0.9689
Pt    0.4938    0.1454    0.9266
Pt    0.4932    0.1453    0.9696
Pt    0.4929    0.1894    0.9293
Pt    0.4918    0.1877    0.9686
Pt    0.4898    0.2329    0.9698
Pt    0.2742    0.0368    0.9912
Pt    0.2766    0.1194    0.9075
Pt    0.2748    0.1641    0.9082
Pt    0.2772    0.1665    0.9509
Pt    0.2771    0.2107    0.9072
Pt    0.2780    0.2116    0.9497
Pt    0.2745    0.2552    0.9078
Pt    0.2765    0.2557    0.9508
Pt    0.2765    0.2531    0.9944
Pt    0.3177    0.0360    0.9477
Pt    0.3185    0.0353    0.9927
Pt    0.3173    0.0792    0.9930
Pt    0.3200    0.1199    0.9074
Pt    0.3194    0.1651    0.9070
Pt    0.3178    0.1643    0.9543
Pt    0.3210    0.2102    0.9062
Pt    0.3195    0.2104    0.9516
Pt    0.3208    0.2116    0.9932
Pt    0.3177    0.2529    0.9069
Pt    0.3205    0.2572    0.9503
Pt    0.3610    0.0357    0.9022
Pt    0.3613    0.0369    0.9471
Pt    0.3586    0.0347    0.9927
Pt    0.3627    0.0809    0.9038
Pt    0.3605    0.0786    0.9487
Pt    0.3595    0.0793    0.9917
Pt    0.3636    0.1240    0.9054
Pt    0.3628    0.1230    0.9500
Pt    0.3612    0.1232    0.9933
Pt    0.3611    0.1669    0.9070
Pt    0.3625    0.1653    0.9502
Pt    0.3656    0.1673    0.9956
Pt    0.3618    0.2101    0.9069
Pt    0.3631    0.2113    0.9509
Pt    0.3633    0.2520    0.9072
Pt    0.3652    0.2541    0.9494
Pt    0.4037    0.0346    0.9032
Pt    0.4066    0.0363    0.9488
Pt    0.4062    0.0367    0.9921
Pt    0.4039    0.0789    0.9050
Pt    0.4052    0.0793    0.9491
Pt    0.4057    0.0792    0.9910
Pt    0.4077    0.1238    0.9055
Pt    0.4044    0.1241    0.9492
Pt    0.4067    0.1241    0.9931
Pt    0.4080    0.1679    0.9046
Pt    0.4073    0.1666    0.9498
Pt    0.4061    0.1695    0.9942
Pt    0.4089    0.2104    0.9080
Pt    0.4066    0.2508    0.9048
Pt    0.4492    0.0339    0.9036
Pt    0.4496    0.0353    0.9466
Pt    0.4487    0.0341    0.9924
Pt    0.4502    0.0793    0.9034
Pt    0.4491    0.0809    0.9458
Pt    0.4496    0.0807    0.9917
Pt    0.4494    0.1248    0.9055
Pt    0.4491    0.1218    0.9486
Pt    0.4480    0.1242    0.9941
Pt    0.4491    0.1669    0.9037
Pt    0.4481    0.1691    0.9492
Pt    0.4513    0.1689    0.9918
Pt    0.4492    0.2115    0.9923
Pt    0.4933    0.0332    0.9041
Pt    0.4912    0.0347    0.9486
Pt    0.4932    0.0345    0.9924
Pt    0.4942    0.0817    0.9047
Pt    0.4930    0.0796    0.9491
Pt    0.4927    0.0794    0.9931
Pt    0.4914    0.1231    0.9038
Pt    0.4968    0.1230    0.9493
Pt    0.4939    0.1221    0.9894
Pt    0.4953    0.1669    0.9070
Pt    0.4940    0.1672    0.9480
Pt    0.4914    0.1688    0.9937
Pt    0.4937    0.2110    0.9486
Pt    0.4905    0.2139    0.9905
Pt    0.4910    0.2551    0.9915
Pt    0.5148    0.1232    0.9276
Pt    0.2972    0.0588    0.9951
Pt    0.2999    0.0998    0.9076
Pt    0.2968    0.1414    0.9068
Pt    0.2979    0.1899    0.9079
Pt    0.2987    0.1890    0.9510
Pt    0.2965    0.2326    0.9072
Pt    0.2984    0.2325    0.9531
Pt    0.2970    0.2288    0.9960
Pt    0.3824    0.1229    0.9725
Pt    0.3838    0.1228    0.9280
Pt    0.3828    0.0787    0.9701
Pt    0.3398    0.0564    0.9061
Pt    0.3377    0.0585    0.9495
Pt    0.3395    0.0586    0.9902
Pt    0.3420    0.1006    0.9032
Pt    0.3413    0.1013    0.9496
Pt    0.3377    0.1014    0.9928
Pt    0.3408    0.1443    0.9068
Pt    0.3418    0.1436    0.9499
Pt    0.3417    0.1877    0.9060
Pt    0.3411    0.1880    0.9511
Pt    0.3404    0.2316    0.9066
Pt    0.3422    0.2317    0.9509
Pt    0.3827    0.0780    0.9284
Pt    0.3839    0.0362    0.9707
Pt    0.3819    0.0373    0.9261
Pt    0.3838    0.0577    0.9050
Pt    0.3854    0.0554    0.9478
Pt    0.3825    0.0572    0.9913
Pt    0.3835    0.1035    0.9057
Pt    0.3851    0.1026    0.9496
Pt    0.3837    0.1020    0.9931
Pt    0.3864    0.1454    0.9052
Pt    0.3830    0.1453    0.9503
Pt    0.3852    0.1463    0.9934
Pt    0.3832    0.1898    0.9073
Pt    0.3833    0.1884    0.9524
Pt    0.3847    0.2288    0.9079
Pt    0.3420    0.2546    0.9693
Pt    0.3407    0.2530    0.9282
Pt    0.3417    0.2091    0.9722
Pt    0.4274    0.0581    0.9033
Pt    0.4280    0.0587    0.9480
Pt    0.4277    0.0583    0.9936
Pt    0.4272    0.1002    0.9046
Pt    0.4286    0.1005    0.9491
Pt    0.4266    0.1009    0.9942
Pt    0.4285    0.1453    0.9035
Pt    0.4302    0.1458    0.9495
Pt    0.4283    0.1468    0.9930
Pt    0.4292    0.1887    0.9055
Pt    0.4263    0.1903    0.9495
Pt    0.4298    0.1895    0.9933
Pt    0.4281    0.2307    0.9045
Pt    0.3408    0.2099    0.9291
Pt    0.3417    0.1661    0.9714
Pt    0.3406    0.1660    0.9277
Pt    0.4733    0.0587    0.9029
Pt    0.4702    0.0561    0.9481
Pt    0.4692    0.0574    0.9916
Pt    0.4702    0.1005    0.9054
Pt    0.4727    0.1009    0.9485
Pt    0.4728    0.1001    0.9920
Pt    0.4709    0.1446    0.9042
Pt    0.4705    0.1422    0.9496
Pt    0.4712    0.1433    0.9919
Pt    0.4702    0.1890    0.9090
Pt    0.4694    0.1897    0.9449
Pt    0.4721    0.1919    0.9900
Pt    0.4695    0.2342    0.9937
Pt    0.3395    0.1240    0.9711
Pt    0.3401    0.1229    0.9278
Pt    0.3369    0.0794    0.9690
Pt    0.4702    0.2124    0.9667
Pt    0.4723    0.1662    0.9685
Pt    0.4709    0.1648    0.9269
Pt    0.4724    0.1223    0.9716
Pt    0.4719    0.1229    0.9277
Pt    0.4724    0.0780    0.9701
Pt    0.4710    0.0767    0.9268
Pt    0.4707    0.0338    0.9696
Pt    0.4726    0.0375    0.9246
Pt    0.4274    0.1696    0.9726
Pt    0.4307    0.1677    0.9261
Pt    0.4306    0.1216    0.9709
Pt    0.4280    0.0367    0.0137
Pt    0.2961    0.0360    0.9708
Pt    0.2986    0.1221    0.9291
Pt    0.2974    0.1654    0.9283
Pt    0.2983    0.2103    0.9303
Pt    0.2972    0.2089    0.9758
Pt    0.2958    0.2532    0.9313
Pt    0.2971    0.2551    0.9742
Pt    0.3412    0.0360    0.9260
Pt    0.3387    0.0347    0.9710
Pt    0.3388    0.0786    0.9269
Pt    0.3613    0.0574    0.0137
Pt    0.4028    0.0153    0.9270
Pt    0.4703    0.1220    0.0142
Pt    0.4937    0.0562    0.0127
Pt    0.5146    0.1459    0.9918
Pt    0.5129    0.2123    0.0142
Pt    0.3405    0.1265    0.0135
Pt    0.2962    0.2591    0.0142
Pt    0.3852    0.1244    0.0129
Pt    0.4509    0.1478    0.0132
Pt    0.5141    0.1026    0.9014
Pt    0.5136    0.0143    0.9934
Pt    0.4068    0.0572    0.0143
Pt    0.5123    0.2335    0.9905
Pt    0.5141    0.0790    0.0141
Pt    0.4705    0.0356    0.0114
Pt    0.3160    0.0164    0.9688
Pt    0.4925    0.1459    0.0127
Pt    0.3404    0.0153    0.9477
Pt    0.5143    0.1017    0.9928
Pt    0.3842    0.0152    0.9916
Pt    0.5138    0.0330    0.9687
Pt    0.3389    0.0782    0.0139
Pt    0.5142    0.2111    0.9713
Pt    0.3827    0.0787    0.0142
Pt    0.5137    0.1450    0.9043
Pt    0.2964    0.0366    0.0127
Pt    0.4053    0.1907    0.0128
Pt    0.4480    0.1009    0.0131
Pt    0.4481    0.0583    0.0142
Pt    0.5148    0.1671    0.9739
Pt    0.3591    0.1010    0.0137
Pt    0.3842    0.0363    0.0126
Pt    0.4937    0.1903    0.0144
Pt    0.3191    0.0562    0.0136
Pt    0.4071    0.1458    0.0135
Pt    0.4266    0.0796    0.0141
Pt    0.2948    0.0148    0.9930
Pt    0.4715    0.4265    0.0595
Pt    0.2767    0.2747    0.0562
Pt    0.2746    0.2752    0.1007
Pt    0.2739    0.3254    0.0560
Pt    0.2782    0.3212    0.1013
Pt    0.2755    0.3607    0.1030
Pt    0.4726    0.3811    0.1041
Pt    0.3190    0.2762    0.0564
Pt    0.3191    0.2755    0.0965
Pt    0.3207    0.3206    0.0573
Pt    0.3235    0.3183    0.1008
Pt    0.3185    0.3631    0.1021
Pt    0.3180    0.4058    0.0996
Pt    0.4721    0.3846    0.0598
Pt    0.3194    0.4469    0.0585
Pt    0.4705    0.3367    0.1018
Pt    0.3179    0.4925    0.0622
Pt    0.3613    0.2726    0.1010
Pt    0.3648    0.3177    0.1006
Pt    0.4679    0.3370    0.0542
Pt    0.3619    0.3631    0.0587
Pt    0.3648    0.3614    0.0998
Pt    0.5128    0.3573    0.1252
Pt    0.3596    0.4027    0.0571
Pt    0.3640    0.4085    0.1036
Pt    0.4035    0.4069    0.0157
Pt    0.3621    0.4479    0.0581
Pt    0.3631    0.4503    0.1042
Pt    0.4931    0.3609    0.0169
Pt    0.3598    0.4929    0.0599
Pt    0.3614    0.4904    0.1024
Pt    0.4067    0.3165    0.1017
Pt    0.4484    0.4067    0.0170
Pt    0.4042    0.3580    0.0583
Pt    0.4080    0.3616    0.1015
Pt    0.4288    0.5126    0.1046
Pt    0.4060    0.4048    0.0575
Pt    0.4064    0.4059    0.1037
Pt    0.3811    0.5131    0.1039
Pt    0.4059    0.4481    0.0584
Pt    0.4065    0.4490    0.1053
Pt    0.3396    0.3418    0.0561
Pt    0.4053    0.4903    0.0603
Pt    0.4048    0.4927    0.1021
Pt    0.4707    0.4281    0.1040
Pt    0.4459    0.3161    0.0564
Pt    0.4284    0.4709    0.1043
Pt    0.4499    0.3610    0.0593
Pt    0.4484    0.3594    0.1027
Pt    0.4020    0.5135    0.0406
Pt    0.4506    0.4070    0.0613
Pt    0.4478    0.4023    0.1035
Pt    0.4277    0.4713    0.0577
Pt    0.4521    0.4493    0.0604
Pt    0.4498    0.4486    0.1044
Pt    0.5140    0.3836    0.0599
Pt    0.4485    0.4945    0.0570
Pt    0.4511    0.4917    0.1041
Pt    0.4267    0.4275    0.1045
Pt    0.4274    0.4276    0.0584
Pt    0.4923    0.3160    0.0584
Pt    0.5150    0.4055    0.0378
Pt    0.4910    0.3612    0.0610
Pt    0.4923    0.3611    0.1042
Pt    0.4054    0.5121    0.1260
Pt    0.4952    0.4055    0.0600
Pt    0.4902    0.4052    0.1047
Pt    0.3600    0.5132    0.1251
Pt    0.4927    0.4486    0.0594
Pt    0.4944    0.4487    0.1040
Pt    0.4271    0.3835    0.1027
Pt    0.4932    0.4933    0.0616
Pt    0.4937    0.4932    0.1052
Pt    0.2775    0.3000    0.0389
Pt    0.2761    0.2972    0.0771
Pt    0.2764    0.2985    0.1211
Pt    0.2756    0.3427    0.0811
Pt    0.2759    0.3408    0.1250
Pt    0.2756    0.3839    0.1220
Pt    0.4291    0.3822    0.0608
Pt    0.3182    0.2975    0.0339
Pt    0.3208    0.2995    0.0787
Pt    0.3210    0.2962    0.1212
Pt    0.3207    0.3405    0.0815
Pt    0.3218    0.3411    0.1226
Pt    0.3205    0.3828    0.0776
Pt    0.3188    0.3873    0.1224
Pt    0.3204    0.4267    0.1231
Pt    0.3191    0.4716    0.0395
Pt    0.3208    0.4683    0.0815
Pt    0.3422    0.2966    0.0983
Pt    0.4272    0.5137    0.0589
Pt    0.3647    0.2946    0.0759
Pt    0.3634    0.2952    0.1203
Pt    0.3638    0.3403    0.0780
Pt    0.3645    0.3404    0.1223
Pt    0.3629    0.3797    0.0358
Pt    0.3632    0.3841    0.0798
Pt    0.3648    0.3834    0.1234
Pt    0.3615    0.4269    0.0366
Pt    0.3633    0.4246    0.0786
Pt    0.3643    0.4283    0.1253
Pt    0.3617    0.4697    0.0371
Pt    0.3604    0.4697    0.0805
Pt    0.3624    0.4705    0.1253
Pt    0.5135    0.4711    0.1029
Pt    0.3852    0.3390    0.1001
Pt    0.4478    0.3634    0.0178
Pt    0.4057    0.2963    0.1230
Pt    0.4079    0.3383    0.0801
Pt    0.4058    0.3400    0.1223
Pt    0.4057    0.3818    0.0365
Pt    0.4071    0.3845    0.0815
Pt    0.4074    0.3844    0.1267
Pt    0.4056    0.4270    0.0360
Pt    0.4058    0.4273    0.0815
Pt    0.4057    0.4271    0.1265
Pt    0.4054    0.4710    0.0360
Pt    0.4047    0.4676    0.0812
Pt    0.4078    0.4733    0.1279
Pt    0.3855    0.2961    0.0986
Pt    0.3404    0.3832    0.1001
Pt    0.3409    0.4683    0.0587
Pt    0.4475    0.3379    0.0360
Pt    0.4466    0.3366    0.0790
Pt    0.4483    0.3396    0.1239
Pt    0.4494    0.3847    0.0387
Pt    0.4509    0.3825    0.0818
Pt    0.4520    0.3811    0.1257
Pt    0.4492    0.4269    0.0388
Pt    0.4490    0.4290    0.0832
Pt    0.4510    0.4272    0.1270
Pt    0.4514    0.4720    0.0384
Pt    0.4484    0.4723    0.0825
Pt    0.4487    0.4712    0.1257
Pt    0.4710    0.4713    0.1047
Pt    0.4278    0.3385    0.1017
Pt    0.3603    0.5140    0.0384
Pt    0.4913    0.2947    0.0345
Pt    0.4920    0.3400    0.0393
Pt    0.4901    0.3361    0.0798
Pt    0.4941    0.3850    0.0365
Pt    0.4920    0.3842    0.0822
Pt    0.4926    0.3812    0.1254
Pt    0.4949    0.4274    0.0384
Pt    0.4926    0.4267    0.0832
Pt    0.4913    0.4257    0.1265
Pt    0.4927    0.4689    0.0390
Pt    0.4941    0.4690    0.0816
Pt    0.4928    0.4716    0.1278
Pt    0.3372    0.4706    0.0172
Pt    0.5147    0.4058    0.1254
Pt    0.4723    0.3403    0.0153
Pt    0.2983    0.2764    0.0364
Pt    0.2977    0.2758    0.0776
Pt    0.2978    0.2774    0.1207
Pt    0.2965    0.3219    0.0358
Pt    0.2984    0.3213    0.0777
Pt    0.3008    0.3181    0.1228
Pt    0.2986    0.3620    0.0807
Pt    0.2988    0.3640    0.1239
Pt    0.2953    0.4062    0.1212
Pt    0.2961    0.4919    0.0398
Pt    0.3408    0.2754    0.0784
Pt    0.3412    0.2749    0.1223
Pt    0.3452    0.3196    0.0782
Pt    0.3424    0.3189    0.1225
Pt    0.3399    0.3630    0.0772
Pt    0.3432    0.3636    0.1227
Pt    0.3409    0.4063    0.0807
Pt    0.3419    0.4057    0.1211
Pt    0.3404    0.4480    0.0353
Pt    0.3388    0.4466    0.0818
Pt    0.3405    0.4502    0.1248
Pt    0.3394    0.4921    0.0381
Pt    0.3379    0.4919    0.0826
Pt    0.3862    0.2755    0.1209
Pt    0.3851    0.3160    0.0772
Pt    0.3852    0.3168    0.1228
Pt    0.3855    0.3607    0.0372
Pt    0.3851    0.3605    0.0793
Pt    0.3854    0.3623    0.1232
Pt    0.3819    0.4025    0.0385
Pt    0.3844    0.4062    0.0800
Pt    0.3851    0.4048    0.1230
Pt    0.3839    0.4478    0.0362
Pt    0.3822    0.4472    0.0798
Pt    0.3867    0.4519    0.1255
Pt    0.3818    0.4919    0.0367
Pt    0.3827    0.4913    0.0803
Pt    0.3818    0.4924    0.1250
Pt    0.4302    0.3162    0.1228
Pt    0.4270    0.3584    0.0385
Pt    0.4277    0.3608    0.0801
Pt    0.4278    0.3623    0.1248
Pt    0.4255    0.4057    0.0369
Pt    0.4296    0.4060    0.0798
Pt    0.4289    0.4069    0.1254
Pt    0.4259    0.4489    0.0369
Pt    0.4276    0.4489    0.0801
Pt    0.4277    0.4480    0.1278
Pt    0.4265    0.4936    0.0376
Pt    0.4252    0.4925    0.0813
Pt    0.4298    0.4934    0.1270
Pt    0.4695    0.3169    0.0346
Pt    0.4686    0.3166    0.0764
Pt    0.4701    0.3626    0.0379
Pt    0.4685    0.3576    0.0803
Pt    0.4721    0.3577    0.1258
Pt    0.4719    0.4069    0.0390
Pt    0.4718    0.4054    0.0815
Pt    0.4705    0.4038    0.1272
Pt    0.4713    0.4476    0.0363
Pt    0.4718    0.4481    0.0817
Pt    0.4719    0.4484    0.1267
Pt    0.4721    0.4928    0.0398
Pt    0.4714    0.4929    0.0816
Pt    0.4706    0.4929    0.1270
Pt    0.3428    0.4267    0.1013
Pt    0.3871    0.3830    0.1004
Pt    0.4265    0.3375    0.0577
Pt    0.3415    0.2980    0.0581
Pt    0.2952    0.4692    0.0183
Pt    0.3844    0.4294    0.1038
Pt    0.3398    0.4270    0.0591
Pt    0.3828    0.4702    0.0584
Pt    0.2967    0.2998    0.0158
Pt    0.3422    0.3413    0.0998
Pt    0.4715    0.4718    0.0615
Pt    0.2961    0.5137    0.0608
Pt    0.3855    0.3836    0.0596
Pt    0.3838    0.4253    0.0590
Pt    0.4267    0.3861    0.0151
Pt    0.3395    0.4715    0.1043
Pt    0.2988    0.2988    0.0595
Pt    0.2978    0.2972    0.0991
Pt    0.2989    0.3417    0.0590
Pt    0.2987    0.3423    0.1027
Pt    0.2965    0.3848    0.1015
Pt    0.3851    0.4706    0.1032
Pt    0.3590    0.4933    0.0151
Pt    0.4498    0.4491    0.0167
Pt    0.4961    0.4922    0.0155
Pt    0.4259    0.3370    0.0179
Pt    0.2728    0.2803    0.0169
Pt    0.3376    0.4275    0.0174
Pt    0.4729    0.4728    0.0170
Pt    0.5121    0.3381    0.1020
Pt    0.2752    0.5135    0.0379
Pt    0.5144    0.3173    0.0359
Pt    0.5138    0.4938    0.0817
Pt    0.5146    0.3414    0.0587
Pt    0.3620    0.4039    0.0174
Pt    0.3823    0.5138    0.0166
Pt    0.5144    0.2765    0.0371
Pt    0.4491    0.4930    0.0158
Pt    0.3144    0.4919    0.0156
Pt    0.3382    0.5135    0.0580
Pt    0.4269    0.4710    0.0155
Pt    0.4040    0.5140    0.0808
Pt    0.5125    0.3404    0.0158
Pt    0.3588    0.5138    0.0811
Pt    0.4693    0.3845    0.0156
Pt    0.5136    0.3833    0.1041
Pt    0.5134    0.3611    0.0814
Pt    0.4698    0.5134    0.1045
Pt    0.4716    0.4262    0.0156
Pt    0.2735    0.4891    0.0167
Pt    0.3379    0.5140    0.1038
Pt    0.3172    0.4475    0.0181
Pt    0.4945    0.4470    0.0159
Pt    0.4696    0.2941    0.0155
Pt    0.4716    0.5111    0.0166
Pt    0.4266    0.4281    0.0152
Pt    0.4942    0.5140    0.1272
Pt    0.4489    0.3169    0.0150
Pt    0.3637    0.3608    0.0150
Pt    0.5144    0.4930    0.0375
Pt    0.5148    0.3632    0.0389
Pt    0.4931    0.5141    0.0377
Pt    0.4065    0.3596    0.0152
Pt    0.3384    0.5141    0.0149
Pt    0.3825    0.4272    0.0151
Pt    0.4037    0.4931    0.0155
Pt    0.2767    0.2775    0.1429
Pt    0.2782    0.2776    0.1879
Pt    0.2769    0.2751    0.2311
Pt    0.2776    0.3185    0.1430
Pt    0.2774    0.3201    0.1879
Pt    0.2766    0.3184    0.2332
Pt    0.2784    0.3621    0.1455
Pt    0.2773    0.3628    0.1894
Pt    0.2781    0.3630    0.2336
Pt    0.2765    0.4066    0.1446
Pt    0.2752    0.4080    0.1890
Pt    0.2765    0.4075    0.2322
Pt    0.2754    0.4529    0.1872
Pt    0.2752    0.4519    0.2334
Pt    0.2751    0.4976    0.2308
Pt    0.3185    0.2737    0.1437
Pt    0.3189    0.2758    0.1865
Pt    0.3200    0.2754    0.2314
Pt    0.3233    0.3192    0.1444
Pt    0.3237    0.3194    0.1881
Pt    0.3199    0.3203    0.2313
Pt    0.3198    0.3635    0.1440
Pt    0.3217    0.3624    0.1876
Pt    0.3227    0.3629    0.2346
Pt    0.5147    0.4257    0.1928
Pt    0.3185    0.4072    0.1877
Pt    0.3193    0.4079    0.2331
Pt    0.3185    0.4520    0.1463
Pt    0.3188    0.4515    0.1881
Pt    0.3183    0.4505    0.2323
Pt    0.3198    0.4973    0.2308
Pt    0.3672    0.2769    0.1458
Pt    0.3645    0.2755    0.1875
Pt    0.3658    0.2745    0.2312
Pt    0.3639    0.3170    0.1444
Pt    0.3655    0.3176    0.1907
Pt    0.3640    0.3187    0.2340
Pt    0.3659    0.3622    0.1462
Pt    0.3633    0.3637    0.1875
Pt    0.3650    0.3641    0.2321
Pt    0.3631    0.4072    0.1448
Pt    0.3633    0.4083    0.1908
Pt    0.3622    0.4067    0.2345
Pt    0.3649    0.4503    0.1466
Pt    0.3650    0.4511    0.1918
Pt    0.3619    0.4517    0.2332
Pt    0.3619    0.4926    0.1467
Pt    0.4097    0.2762    0.1474
Pt    0.4079    0.2747    0.1899
Pt    0.4108    0.2750    0.2335
Pt    0.4115    0.3174    0.1452
Pt    0.4106    0.3182    0.1897
Pt    0.4089    0.3198    0.2301
Pt    0.4079    0.3596    0.1464
Pt    0.4086    0.3648    0.1898
Pt    0.4075    0.3624    0.2332
Pt    0.4093    0.4055    0.1477
Pt    0.4075    0.4076    0.1927
Pt    0.4061    0.4069    0.2354
Pt    0.4061    0.4505    0.1493
Pt    0.4054    0.4500    0.1925
Pt    0.4064    0.4941    0.1491
Pt    0.4540    0.2749    0.1881
Pt    0.4525    0.2752    0.2324
Pt    0.4526    0.3179    0.1460
Pt    0.4548    0.3206    0.1902
Pt    0.4538    0.3179    0.2310
Pt    0.4533    0.3602    0.1465
Pt    0.4524    0.3628    0.1896
Pt    0.4536    0.3612    0.2317
Pt    0.4498    0.4063    0.1510
Pt    0.4491    0.4065    0.1958
Pt    0.4518    0.4513    0.1487
Pt    0.4489    0.4507    0.1960
Pt    0.4504    0.4921    0.1497
Pt    0.4502    0.4938    0.1941
Pt    0.4946    0.2760    0.2307
Pt    0.4949    0.3179    0.2350
Pt    0.4947    0.3618    0.1489
Pt    0.4924    0.4046    0.1467
Pt    0.4915    0.4485    0.1481
Pt    0.4951    0.4505    0.1957
Pt    0.4948    0.4932    0.1495
Pt    0.4928    0.4934    0.1970
Pt    0.4929    0.4946    0.2404
Pt    0.2779    0.2987    0.1658
Pt    0.2768    0.2986    0.2104
Pt    0.2757    0.2977    0.2534
Pt    0.2796    0.3410    0.1684
Pt    0.2775    0.3401    0.2115
Pt    0.2784    0.3410    0.2549
Pt    0.2780    0.3856    0.1685
Pt    0.2786    0.3849    0.2116
Pt    0.2760    0.3877    0.2541
Pt    0.2768    0.4291    0.1672
Pt    0.2753    0.4289    0.2118
Pt    0.2758    0.4298    0.2553
Pt    0.2750    0.4742    0.2116
Pt    0.2783    0.4746    0.2541
Pt    0.4305    0.4287    0.1494
Pt    0.3204    0.2978    0.1677
Pt    0.3215    0.2992    0.2107
Pt    0.3209    0.3000    0.2541
Pt    0.3212    0.3419    0.1665
Pt    0.3212    0.3424    0.2111
Pt    0.3206    0.3417    0.2555
Pt    0.3205    0.3863    0.1662
Pt    0.3200    0.3855    0.2108
Pt    0.3209    0.3833    0.2549
Pt    0.3198    0.4301    0.1672
Pt    0.3191    0.4286    0.2090
Pt    0.3193    0.4282    0.2534
Pt    0.3179    0.4735    0.2085
Pt    0.3227    0.4766    0.2566
Pt    0.3657    0.2995    0.1672
Pt    0.3649    0.2967    0.2110
Pt    0.3657    0.2968    0.2546
Pt    0.3662    0.3393    0.1647
Pt    0.3638    0.3423    0.2117
Pt    0.3642    0.3412    0.2542
Pt    0.3626    0.3856    0.1669
Pt    0.3645    0.3850    0.2094
Pt    0.3624    0.3849    0.2535
Pt    0.3641    0.4295    0.1699
Pt    0.3635    0.4292    0.2127
Pt    0.3614    0.4294    0.2547
Pt    0.3644    0.4715    0.1684
Pt    0.4705    0.4721    0.1939
Pt    0.4103    0.2991    0.1675
Pt    0.4136    0.2971    0.2125
Pt    0.4086    0.2963    0.2577
Pt    0.4109    0.3391    0.1683
Pt    0.4079    0.3415    0.2130
Pt    0.4088    0.3402    0.2541
Pt    0.4092    0.3852    0.1692
Pt    0.4072    0.3854    0.2132
Pt    0.4099    0.3852    0.2543
Pt    0.4062    0.4289    0.1716
Pt    0.4054    0.4318    0.2150
Pt    0.4063    0.4734    0.1706
Pt    0.4303    0.3831    0.2333
Pt    0.4537    0.2967    0.1666
Pt    0.4521    0.2967    0.2105
Pt    0.4532    0.2959    0.2554
Pt    0.4557    0.3403    0.1676
Pt    0.4521    0.3413    0.2112
Pt    0.4520    0.3419    0.2568
Pt    0.4500    0.3850    0.1710
Pt    0.4529    0.3840    0.2123
Pt    0.4498    0.4285    0.1753
Pt    0.4512    0.4716    0.1721
Pt    0.4494    0.4719    0.2148
Pt    0.4729    0.4726    0.1509
Pt    0.4723    0.4275    0.1959
Pt    0.4937    0.2976    0.2104
Pt    0.4989    0.2988    0.2580
Pt    0.4939    0.3877    0.1732
Pt    0.4925    0.4260    0.1715
Pt    0.4928    0.4720    0.1713
Pt    0.4950    0.4721    0.2180
Pt    0.4286    0.3852    0.1916
Pt    0.4717    0.4259    0.1499
Pt    0.4731    0.3819    0.1484
Pt    0.2976    0.2776    0.1658
Pt    0.2987    0.2775    0.2092
Pt    0.2985    0.2767    0.2530
Pt    0.2999    0.3200    0.1672
Pt    0.2984    0.3204    0.2117
Pt    0.2991    0.3182    0.2546
Pt    0.2996    0.3638    0.1666
Pt    0.3005    0.3633    0.2114
Pt    0.2989    0.3622    0.2546
Pt    0.2978    0.4068    0.1689
Pt    0.2976    0.4093    0.2123
Pt    0.2981    0.4076    0.2546
Pt    0.2976    0.4510    0.1671
Pt    0.2954    0.4506    0.2103
Pt    0.2984    0.4522    0.2551
Pt    0.2978    0.4951    0.2089
Pt    0.2974    0.4961    0.2520
Pt    0.3404    0.2758    0.1658
Pt    0.3425    0.2755    0.2111
Pt    0.3425    0.2744    0.2529
Pt    0.3438    0.3206    0.1669
Pt    0.3428    0.3183    0.2101
Pt    0.3412    0.3198    0.2537
Pt    0.3429    0.3635    0.1641
Pt    0.3408    0.3637    0.2103
Pt    0.3445    0.3624    0.2547
Pt    0.3431    0.4072    0.1684
Pt    0.3413    0.4092    0.2110
Pt    0.3412    0.4066    0.2551
Pt    0.3413    0.4512    0.1655
Pt    0.3416    0.4495    0.2119
Pt    0.3409    0.4511    0.2537
Pt    0.3878    0.2776    0.1687
Pt    0.3877    0.2750    0.2110
Pt    0.3857    0.2753    0.2554
Pt    0.3878    0.3188    0.1689
Pt    0.3870    0.3187    0.2101
Pt    0.3875    0.3191    0.2534
Pt    0.3863    0.3625    0.1677
Pt    0.3858    0.3627    0.2094
Pt    0.3871    0.3619    0.2540
Pt    0.3853    0.4061    0.1672
Pt    0.3838    0.4079    0.2136
Pt    0.3831    0.4065    0.2548
Pt    0.3870    0.4507    0.1709
Pt    0.3851    0.4524    0.2131
Pt    0.3846    0.4932    0.1706
Pt    0.4325    0.2745    0.1673
Pt    0.4304    0.2751    0.2105
Pt    0.4324    0.2750    0.2565
Pt    0.4341    0.3188    0.1669
Pt    0.4325    0.3180    0.2113
Pt    0.4329    0.3197    0.2556
Pt    0.4309    0.3615    0.1676
Pt    0.4301    0.3623    0.2111
Pt    0.4286    0.3610    0.2534
Pt    0.4273    0.4079    0.1711
Pt    0.4296    0.4074    0.2167
Pt    0.4288    0.4507    0.1708
Pt    0.4270    0.4942    0.1732
Pt    0.4739    0.2754    0.2102
Pt    0.4768    0.2759    0.2556
Pt    0.4783    0.3212    0.2107
Pt    0.4717    0.3182    0.2565
Pt    0.4729    0.3655    0.1704
Pt    0.4712    0.4062    0.1746
Pt    0.4708    0.4481    0.1735
Pt    0.4716    0.4521    0.2147
Pt    0.4726    0.4936    0.1727
Pt    0.4700    0.4920    0.2205
Pt    0.5148    0.4710    0.1495
Pt    0.3201    0.4078    0.1450
Pt    0.4279    0.4717    0.1505
Pt    0.4275    0.4714    0.1948
Pt    0.5135    0.4268    0.1470
Pt    0.4738    0.2985    0.2329
Pt    0.4728    0.2977    0.1899
Pt    0.4282    0.4295    0.1948
Pt    0.2995    0.2976    0.1435
Pt    0.3015    0.3007    0.1893
Pt    0.3008    0.2972    0.2310
Pt    0.2996    0.3399    0.1441
Pt    0.2982    0.3409    0.1903
Pt    0.2989    0.3422    0.2313
Pt    0.2966    0.3857    0.1449
Pt    0.2994    0.3854    0.1895
Pt    0.2985    0.3851    0.2346
Pt    0.2973    0.4274    0.1445
Pt    0.2983    0.4300    0.1898
Pt    0.2983    0.4292    0.2334
Pt    0.2968    0.4725    0.1893
Pt    0.2974    0.4732    0.2312
Pt    0.4760    0.3437    0.1918
Pt    0.3418    0.2962    0.1439
Pt    0.3441    0.2969    0.1873
Pt    0.3430    0.2963    0.2320
Pt    0.3429    0.3417    0.1450
Pt    0.3437    0.3425    0.1877
Pt    0.3423    0.3408    0.2336
Pt    0.3408    0.3852    0.1446
Pt    0.3410    0.3881    0.1901
Pt    0.3428    0.3854    0.2311
Pt    0.3421    0.4288    0.1451
Pt    0.3418    0.4316    0.1885
Pt    0.3407    0.4269    0.2338
Pt    0.3430    0.4706    0.1888
Pt    0.3365    0.4736    0.2325
Pt    0.3867    0.2987    0.1457
Pt    0.3870    0.2976    0.1903
Pt    0.3892    0.2960    0.2325
Pt    0.3861    0.3391    0.1445
Pt    0.3872    0.3404    0.1898
Pt    0.3852    0.3406    0.2320
Pt    0.3847    0.3853    0.1460
Pt    0.3843    0.3869    0.1894
Pt    0.3855    0.3858    0.2331
Pt    0.3862    0.4280    0.1469
Pt    0.3857    0.4287    0.1926
Pt    0.3827    0.4280    0.2357
Pt    0.3854    0.4720    0.1482
Pt    0.4734    0.3399    0.2317
Pt    0.4303    0.2947    0.1428
Pt    0.4316    0.2966    0.1888
Pt    0.4314    0.2965    0.2351
Pt    0.4304    0.3402    0.1469
Pt    0.4309    0.3407    0.1908
Pt    0.4308    0.3379    0.2349
Pt    0.4294    0.3844    0.1482
Pt    0.5145    0.3840    0.1462
Pt    0.5142    0.4937    0.2190
Pt    0.5089    0.4781    0.2646
Pt    0.5147    0.4928    0.1729
Pt    0.5135    0.4498    0.1720
Pt    0.4714    0.5132    0.1958
Pt    0.5143    0.2744    0.2550
Pt    0.4719    0.5121    0.1507
Pt    0.4490    0.5118    0.2184
Pt    0.5147    0.4714    0.1953
Pt    0.5149    0.2983    0.2330
Pt    0.2759    0.2765    0.2744
Pt    0.2748    0.2753    0.3188
Pt    0.2766    0.2741    0.3642
Pt    0.2760    0.3182    0.2765
Pt    0.2763    0.3197    0.3183
Pt    0.2782    0.3206    0.3664
Pt    0.2767    0.3624    0.2748
Pt    0.2762    0.3641    0.3182
Pt    0.2750    0.3640    0.3621
Pt    0.2752    0.4103    0.2782
Pt    0.2748    0.4093    0.3198
Pt    0.2755    0.4077    0.3664
Pt    0.2758    0.4514    0.2771
Pt    0.2749    0.4513    0.3207
Pt    0.2776    0.4928    0.2766
Pt    0.3212    0.2769    0.2756
Pt    0.3203    0.2769    0.3214
Pt    0.3184    0.2757    0.3657
Pt    0.3197    0.3192    0.2750
Pt    0.3188    0.3192    0.3207
Pt    0.3183    0.3202    0.3641
Pt    0.3216    0.3618    0.2764
Pt    0.3202    0.3637    0.3191
Pt    0.3196    0.3634    0.3645
Pt    0.3194    0.4057    0.2751
Pt    0.3173    0.4080    0.3194
Pt    0.3176    0.4105    0.3636
Pt    0.3211    0.4520    0.2754
Pt    0.3186    0.4526    0.3208
Pt    0.3638    0.2753    0.2783
Pt    0.3661    0.2739    0.3215
Pt    0.3626    0.2726    0.3648
Pt    0.3648    0.3189    0.2750
Pt    0.3614    0.3174    0.3207
Pt    0.3632    0.3198    0.3650
Pt    0.3642    0.3616    0.2773
Pt    0.3625    0.3613    0.3196
Pt    0.3627    0.3625    0.3631
Pt    0.3617    0.4068    0.2767
Pt    0.3620    0.4060    0.3179
Pt    0.3622    0.4080    0.3606
Pt    0.3620    0.4517    0.3595
Pt    0.4069    0.2739    0.2786
Pt    0.4077    0.2754    0.3209
Pt    0.4094    0.2740    0.3641
Pt    0.4090    0.3198    0.2775
Pt    0.4083    0.3193    0.3198
Pt    0.4074    0.3175    0.3641
Pt    0.4079    0.3625    0.2744
Pt    0.4055    0.3624    0.3215
Pt    0.4047    0.3606    0.3629
Pt    0.4053    0.4062    0.2757
Pt    0.4065    0.4061    0.3173
Pt    0.4069    0.4073    0.3609
Pt    0.4074    0.4511    0.3148
Pt    0.4082    0.4521    0.3591
Pt    0.4069    0.4929    0.3580
Pt    0.4535    0.2752    0.2768
[truncated: 809,592 more chars]
