# Supplementary material
Source: publisher figshare collection journal article supplement (https://rs.figshare.com/ndownloader/files/37464464)
Supplement: Supplementary file 2 [file 37464464 › Ordered_Nanoporous_Metals_SI/ONMs_Crystal_Structures/ONM_from_ST_SOD-ST4.cif]

data_block_1
#***********************************************************************************************
#
# On use of this cif file, please acknowledge citation to:
#
# Understanding the stability and structural properties of Ordered Nanoporous Metals towards their rational synthesis
# Jose M. Ortiz-Roldan, Salvador R. G. Balestra, Rocio Bueno-Perez, Sof�a Calero,
# Elena Garcia-Perez, C. Richard A. Catlow, A. Rabdel Ruiz-Salvador, Said Hamad
# Proc. R Soc. A 2022
#
# Contact emails: : said@upo.es, rruisal@upo.es, c.r.a.catlow@ucl.ac.uk
#
#***********************************************************************************************

_audit_creation_date         'Tue March 22 2022'
_audit_creation_method       'generated by GDIS v0.90'


_cell_length_a             94.4458
_cell_length_b             94.3879
_cell_length_c             94.4116
_cell_angle_alpha          90.00
_cell_angle_beta           90.00
_cell_angle_gamma          90.00


_symmetry_space_group_name_H-M   'P 1'
_symmetry_Int_Tables_number       1


loop_
_atom_site_label
_atom_site_fract_x
_atom_site_fract_y
_atom_site_fract_z
Pt    0.9992    0.1646    0.0821
Pt    0.2288    0.2273    0.0805
Pt    0.2281    0.2284    0.0374
Pt    0.1852    0.9987    0.0588
Pt    0.1008    0.1411    0.9995
Pt    0.2270    0.1836    0.0807
Pt    0.2294    0.1857    0.0374
Pt    0.0185    0.1412    0.0800
Pt    0.0820    0.9993    0.0770
Pt    0.1419    0.0420    0.0148
Pt    0.2279    0.1439    0.0794
Pt    0.0183    0.1446    0.0388
Pt    0.2287    0.1431    0.0362
Pt    0.1433    0.0379    0.0618
Pt    0.0610    0.0207    0.0410
Pt    0.0609    0.0208    0.0796
Pt    0.0147    0.9977    0.1017
Pt    0.0807    0.9977    0.0372
Pt    0.0593    0.1009    0.0387
Pt    0.0159    0.1006    0.0796
Pt    0.1440    0.2067    0.0610
Pt    0.0166    0.9988    0.0174
Pt    0.9988    0.1838    0.0599
Pt    0.0211    0.1017    0.0369
Pt    0.2281    0.1034    0.0806
Pt    0.1410    0.0177    0.0807
Pt    0.1431    0.0179    0.0379
Pt    0.1030    0.2073    0.1042
Pt    0.1005    0.2111    0.0615
Pt    0.1032    0.2281    0.0818
Pt    0.1032    0.2278    0.0385
Pt    0.0177    0.0620    0.0787
Pt    0.0192    0.0606    0.0387
Pt    0.0398    0.0413    0.0381
Pt    0.0378    0.0397    0.0804
Pt    0.0183    0.0195    0.0822
Pt    0.0168    0.0175    0.0395
Pt    0.0401    0.0805    0.0387
Pt    0.0403    0.0815    0.0811
Pt    0.0610    0.9990    0.0582
Pt    0.1019    0.2081    0.0181
Pt    0.0394    0.1206    0.0392
Pt    0.0350    0.1217    0.0791
Pt    0.0188    0.1858    0.0374
Pt    0.0609    0.2054    0.0177
Pt    0.0390    0.1642    0.0382
Pt    0.0402    0.1654    0.0819
Pt    0.0185    0.1863    0.0815
Pt    0.9988    0.1226    0.0376
Pt    0.0388    0.2065    0.0401
Pt    0.0410    0.2027    0.0808
Pt    0.2316    0.2039    0.0995
Pt    0.2063    0.2052    0.9971
Pt    0.1030    0.1658    0.1012
Pt    0.1034    0.1872    0.0818
Pt    0.1013    0.1866    0.0414
Pt    0.1444    0.9990    0.1031
Pt    0.2298    0.2061    0.0613
Pt    0.1062    0.1454    0.0802
Pt    0.2277    0.2082    0.0164
Pt    0.2243    0.1626    0.1007
Pt    0.0826    0.0381    0.0388
Pt    0.0804    0.0401    0.0820
Pt    0.2281    0.1632    0.0572
Pt    0.2263    0.1661    0.0192
Pt    0.0793    0.0833    0.0413
Pt    0.0838    0.0819    0.0806
Pt    0.2244    0.1246    0.1030
Pt    0.1021    0.1660    0.0617
Pt    0.0787    0.1224    0.0409
Pt    0.0809    0.1215    0.0827
Pt    0.2287    0.1247    0.0572
Pt    0.0630    0.1651    0.1017
Pt    0.0823    0.1656    0.0393
Pt    0.0803    0.1628    0.0808
Pt    0.2278    0.1218    0.0168
Pt    0.0000    0.0804    0.0382
Pt    0.0818    0.2080    0.0387
Pt    0.0830    0.2087    0.0834
Pt    0.2279    0.0812    0.1038
Pt    0.1019    0.1446    0.0386
Pt    0.1017    0.1661    0.0184
Pt    0.2272    0.0799    0.0617
Pt    0.1043    0.0997    0.0849
Pt    0.1014    0.1043    0.0427
Pt    0.1419    0.2088    0.0202
Pt    0.1438    0.1666    0.1005
Pt    0.2287    0.0813    0.0179
Pt    0.1013    0.1240    0.1027
Pt    0.1231    0.0414    0.0375
Pt    0.1232    0.0409    0.0824
Pt    0.2253    0.0395    0.1035
Pt    0.1020    0.1262    0.0599
Pt    0.1236    0.0839    0.0417
Pt    0.1231    0.0812    0.0833
Pt    0.2256    0.0410    0.0616
Pt    0.1021    0.1226    0.0200
Pt    0.1242    0.1208    0.0372
Pt    0.1209    0.1222    0.0836
Pt    0.2271    0.0400    0.0177
Pt    0.0179    0.0600    0.9973
Pt    0.1222    0.1636    0.0380
Pt    0.1246    0.1643    0.0832
Pt    0.1447    0.1639    0.0596
Pt    0.1862    0.9982    0.0200
Pt    0.1202    0.2057    0.0410
Pt    0.1232    0.2079    0.0818
Pt    0.1434    0.1642    0.0187
Pt    0.2270    0.9989    0.0171
Pt    0.2058    0.9973    0.0816
Pt    0.1026    0.0623    0.0815
Pt    0.1018    0.0620    0.0408
Pt    0.0398    0.9989    0.0811
Pt    0.0594    0.2047    0.1016
Pt    0.0596    0.2064    0.0581
Pt    0.1418    0.1432    0.9985
Pt    0.0622    0.1648    0.0590
Pt    0.1617    0.0371    0.0409
Pt    0.1629    0.0391    0.0791
Pt    0.0184    0.2282    0.0383
Pt    0.0610    0.1638    0.0171
Pt    0.1641    0.0806    0.0417
Pt    0.1660    0.0869    0.0823
Pt    0.1874    0.2038    0.1012
Pt    0.0997    0.0002    0.0576
Pt    0.1655    0.1229    0.0383
Pt    0.1637    0.1235    0.0823
Pt    0.1444    0.1245    0.1033
Pt    0.0186    0.9973    0.0578
Pt    0.1640    0.1636    0.0408
Pt    0.1657    0.1634    0.0793
Pt    0.1441    0.1215    0.0629
Pt    0.0825    0.0799    0.0006
Pt    0.1660    0.2017    0.0390
Pt    0.1673    0.2061    0.0821
Pt    0.1039    0.0790    0.1039
Pt    0.1863    0.2040    0.0584
Pt    0.1015    0.0181    0.0843
Pt    0.1025    0.0186    0.0392
Pt    0.1834    0.2064    0.0181
Pt    0.1853    0.1656    0.1063
Pt    0.1661    0.9986    0.9971
Pt    0.0990    0.2464    0.0181
Pt    0.1868    0.1675    0.0589
Pt    0.0602    0.0401    0.1013
Pt    0.2067    0.0411    0.0401
Pt    0.2061    0.0415    0.0813
Pt    0.1866    0.1626    0.0180
Pt    0.0595    0.0408    0.0611
Pt    0.2068    0.0817    0.0392
Pt    0.2064    0.0838    0.0846
Pt    0.1854    0.1237    0.1037
Pt    0.1227    0.9980    0.0836
Pt    0.2054    0.1214    0.0402
Pt    0.2063    0.1252    0.0797
Pt    0.1445    0.1244    0.0166
Pt    0.2060    0.9991    0.0399
Pt    0.2068    0.1636    0.0370
Pt    0.2074    0.1631    0.0772
Pt    0.1024    0.0830    0.0613
Pt    0.1225    0.2053    0.9983
Pt    0.2082    0.2054    0.0400
Pt    0.2050    0.2077    0.0777
Pt    0.0397    0.9970    0.0368
Pt    0.0586    0.2245    0.0819
Pt    0.0586    0.2278    0.0380
Pt    0.0178    0.2255    0.9988
Pt    0.1866    0.1210    0.0589
Pt    0.2260    0.1024    0.0380
Pt    0.9985    0.2057    0.0416
Pt    0.1867    0.1229    0.0191
Pt    0.2252    0.0613    0.0825
Pt    0.2266    0.0615    0.0383
Pt    0.0632    0.0419    0.0201
Pt    0.1855    0.0802    0.1036
Pt    0.2253    0.0184    0.0813
Pt    0.2264    0.0194    0.0371
Pt    0.0583    0.1043    0.0813
Pt    0.0996    0.9970    0.1023
Pt    0.1857    0.2274    0.0815
Pt    0.1856    0.2234    0.0399
Pt    0.0615    0.0786    0.0201
Pt    0.1010    0.0821    0.0216
Pt    0.1863    0.1813    0.0816
Pt    0.1872    0.1846    0.0371
Pt    0.0183    0.2247    0.0835
Pt    0.1421    0.0820    0.1040
Pt    0.1862    0.1445    0.0809
Pt    0.1863    0.1427    0.0382
Pt    0.0367    0.1629    0.9998
Pt    0.1443    0.0809    0.0609
Pt    0.1857    0.1037    0.0815
Pt    0.1844    0.1013    0.0398
Pt    0.9976    0.1866    0.1008
Pt    0.1862    0.0812    0.0610
Pt    0.1846    0.0608    0.0811
Pt    0.1858    0.0611    0.0414
Pt    0.1647    0.9967    0.0815
Pt    0.1854    0.0812    0.0180
Pt    0.1854    0.0220    0.0824
Pt    0.1859    0.0207    0.0405
Pt    0.0621    0.1456    0.0379
Pt    0.1035    0.0406    0.1011
Pt    0.1455    0.2261    0.0808
Pt    0.1438    0.2291    0.0384
Pt    0.1031    0.0406    0.0608
Pt    0.1019    0.0376    0.0193
Pt    0.1457    0.2088    0.1027
Pt    0.0599    0.1454    0.0816
Pt    0.0793    0.2453    0.0796
Pt    0.9968    0.2273    0.0585
Pt    0.1226    0.1653    0.9981
Pt    0.0602    0.1256    0.1009
Pt    0.0186    0.2048    0.1029
Pt    0.0375    0.0193    0.0189
Pt    0.0381    0.0177    0.0599
Pt    0.0388    0.0216    0.1009
Pt    0.0391    0.0613    0.0160
Pt    0.0383    0.0591    0.0585
Pt    0.0368    0.0609    0.1020
Pt    0.0407    0.1019    0.0174
Pt    0.0392    0.1015    0.0595
Pt    0.0383    0.1016    0.0985
Pt    0.0392    0.1416    0.0200
Pt    0.0367    0.1442    0.0582
Pt    0.0374    0.1432    0.1002
Pt    0.0408    0.1854    0.0178
Pt    0.0422    0.1828    0.0604
Pt    0.0397    0.1842    0.1038
Pt    0.0393    0.2272    0.0161
Pt    0.0400    0.2267    0.0620
Pt    0.0396    0.2237    0.1040
Pt    0.0808    0.0190    0.0208
Pt    0.0805    0.0233    0.0619
Pt    0.0802    0.0200    0.1017
Pt    0.0832    0.0612    0.0199
Pt    0.0793    0.0589    0.0621
Pt    0.0825    0.0611    0.1029
Pt    0.0821    0.1029    0.0205
Pt    0.0787    0.1032    0.0616
Pt    0.0822    0.1009    0.1020
Pt    0.0797    0.1430    0.0173
Pt    0.0817    0.1454    0.0591
Pt    0.0817    0.1454    0.1026
Pt    0.0830    0.1879    0.0168
Pt    0.0823    0.1877    0.0627
Pt    0.0839    0.1857    0.1016
Pt    0.0762    0.2273    0.0178
Pt    0.0787    0.2272    0.0587
Pt    0.0800    0.2298    0.1031
Pt    0.1241    0.0168    0.0162
Pt    0.1212    0.0194    0.0592
Pt    0.1224    0.0201    0.1032
Pt    0.1239    0.0634    0.0170
Pt    0.1237    0.0613    0.0599
Pt    0.1236    0.0582    0.1028
Pt    0.1226    0.0997    0.0189
Pt    0.1221    0.1023    0.0612
Pt    0.1233    0.1021    0.1062
Pt    0.1223    0.1425    0.0178
Pt    0.1247    0.1424    0.0588
Pt    0.1217    0.1435    0.1081
Pt    0.1219    0.1861    0.0195
Pt    0.1214    0.1868    0.0625
Pt    0.1238    0.1862    0.1014
Pt    0.1217    0.2283    0.0198
Pt    0.1240    0.2261    0.0633
Pt    0.1231    0.2280    0.1033
Pt    0.1623    0.0192    0.0172
Pt    0.1633    0.0163    0.0614
Pt    0.1649    0.0180    0.1015
Pt    0.1663    0.0581    0.0197
Pt    0.1637    0.0606    0.0614
Pt    0.1639    0.0621    0.1023
Pt    0.1655    0.1029    0.0167
Pt    0.1658    0.1034    0.0596
Pt    0.1646    0.1039    0.1032
Pt    0.1659    0.1432    0.0165
Pt    0.1642    0.1407    0.0604
Pt    0.1664    0.1440    0.1030
Pt    0.1627    0.1837    0.0194
Pt    0.1649    0.1867    0.0618
Pt    0.1653    0.1864    0.1046
Pt    0.1640    0.2287    0.0159
Pt    0.1632    0.2246    0.0579
Pt    0.1668    0.2282    0.1022
Pt    0.2084    0.0196    0.0173
Pt    0.2040    0.0198    0.0601
Pt    0.2066    0.0200    0.1016
Pt    0.2052    0.0608    0.0197
Pt    0.2049    0.0620    0.0614
Pt    0.2072    0.0617    0.1049
Pt    0.2074    0.1000    0.0163
Pt    0.2080    0.1019    0.0614
Pt    0.2055    0.1028    0.1029
Pt    0.2075    0.1432    0.0189
Pt    0.2076    0.1421    0.0562
Pt    0.2044    0.1453    0.1025
Pt    0.2078    0.1868    0.0178
Pt    0.2103    0.1847    0.0584
Pt    0.2063    0.1844    0.0993
Pt    0.2063    0.2261    0.0188
Pt    0.2087    0.2281    0.0615
Pt    0.2087    0.2282    0.1000
Pt    0.0587    0.1254    0.0625
Pt    0.1476    0.0813    0.0177
Pt    0.1453    0.1862    0.0826
Pt    0.1409    0.1866    0.0392
Pt    0.0592    0.1228    0.0180
Pt    0.1435    0.0393    0.1017
Pt    0.1436    0.1427    0.0833
Pt    0.1452    0.1423    0.0385
Pt    0.0615    0.0793    0.1008
Pt    0.1863    0.0390    0.1036
Pt    0.1424    0.1032    0.0834
Pt    0.1457    0.1046    0.0419
Pt    0.0609    0.0613    0.0427
Pt    0.1844    0.0401    0.0618
Pt    0.1415    0.0607    0.0797
Pt    0.1433    0.0592    0.0397
Pt    0.0592    0.0593    0.0811
Pt    0.1865    0.0379    0.0188
Pt    0.0639    0.1864    0.0831
Pt    0.0621    0.1876    0.0399
Pt    0.0597    0.0806    0.0609
Pt    0.0180    0.0402    0.0188
Pt    0.0185    0.0389    0.0582
Pt    0.0166    0.0392    0.1017
Pt    0.0188    0.0797    0.0160
Pt    0.0180    0.0819    0.0602
Pt    0.0177    0.0794    0.1013
Pt    0.0190    0.1207    0.0151
Pt    0.0163    0.1217    0.0603
Pt    0.0176    0.1237    0.1036
Pt    0.0150    0.1652    0.0190
Pt    0.0191    0.1661    0.0597
Pt    0.0180    0.1661    0.1026
Pt    0.0196    0.2055    0.0193
Pt    0.0180    0.2075    0.0612
Pt    0.1842    0.9975    0.0999
Pt    0.2459    0.9981    0.0374
Pt    0.0621    0.0003    0.0998
Pt    0.1657    0.2455    0.0796
Pt    0.1033    0.0605    0.9985
Pt    0.9990    0.0823    0.9994
Pt    0.1433    0.2223    0.9970
Pt    0.9969    0.1226    0.0839
Pt    0.2274    0.0005    0.0604
Pt    0.9970    0.1220    0.9969
Pt    0.1420    0.9989    0.0595
Pt    0.9965    0.0382    0.0385
Pt    0.9970    0.0182    0.0589
Pt    0.9973    0.2064    0.0799
Pt    0.1238    0.9988    0.0368
Pt    0.9970    0.2082    0.9984
Pt    0.9965    0.9987    0.0413
Pt    0.9971    0.9970    0.0804
Pt    0.0364    0.0393    0.9987
Pt    0.2081    0.1229    0.9975
Pt    0.1880    0.1015    0.9977
Pt    0.1001    0.9976    0.0157
Pt    0.0155    0.1852    0.9991
Pt    0.1851    0.1862    0.9992
Pt    0.1013    0.1020    0.9968
Pt    0.9983    0.1447    0.1026
Pt    0.9968    0.1854    0.0195
Pt    0.9966    0.1004    0.1029
Pt    0.1855    0.2257    0.9974
Pt    0.2257    0.1858    0.9983
Pt    0.2461    0.1817    0.1035
Pt    0.9988    0.0402    0.0815
Pt    0.9975    0.0168    0.0191
Pt    0.9992    0.1008    0.0186
Pt    0.1418    0.1862    0.9985
Pt    0.9970    0.0593    0.0191
Pt    0.1856    0.2452    0.0577
Pt    0.0604    0.1020    0.1183
Pt    0.9967    0.1041    0.0597
Pt    0.9978    0.1425    0.0605
Pt    0.2462    0.0604    0.1030
Pt    0.9986    0.2285    0.1002
Pt    0.2065    0.0798    0.9989
Pt    0.0568    0.1438    0.9971
Pt    0.9977    0.0385    0.0006
Pt    0.0594    0.1857    0.9967
Pt    0.1873    0.0182    0.9984
Pt    0.0585    0.0013    0.0161
Pt    0.1433    0.1037    0.9977
Pt    0.2271    0.0171    0.1203
Pt    0.2460    0.9983    0.0802
Pt    0.0199    0.2467    0.1024
Pt    0.2051    0.0410    0.9988
Pt    0.1020    0.2273    0.9986
Pt    0.0403    0.0816    0.9967
Pt    0.2283    0.0618    0.9975
Pt    0.0824    0.0410    0.0005
Pt    0.2461    0.1056    0.1053
Pt    0.1025    0.0186    0.9984
Pt    0.2459    0.1018    0.0592
Pt    0.2088    0.2065    0.1196
Pt    0.1427    0.1859    0.1214
Pt    0.1669    0.0368    0.9977
Pt    0.1635    0.1638    0.9975
Pt    0.1228    0.0846    0.9968
Pt    0.0145    0.1452    0.9978
Pt    0.2273    0.0191    0.9978
Pt    0.0187    0.0168    0.9966
Pt    0.1653    0.0808    0.9968
Pt    0.2460    0.1431    0.1027
Pt    0.9965    0.1613    0.0401
Pt    0.0168    0.1013    0.1215
Pt    0.0386    0.2048    0.9967
Pt    0.0633    0.1841    0.1655
Pt    0.2296    0.2281    0.2052
Pt    0.2277    0.2285    0.1671
Pt    0.9982    0.1653    0.1668
Pt    0.0628    0.1859    0.1248
Pt    0.0630    0.1462    0.2098
Pt    0.0603    0.0616    0.1222
Pt    0.9995    0.0792    0.2459
Pt    0.0600    0.1458    0.1645
Pt    0.2275    0.9974    0.1841
Pt    0.9978    0.1864    0.1853
Pt    0.0587    0.1014    0.2083
Pt    0.9974    0.2024    0.2087
Pt    0.0592    0.9990    0.1424
Pt    0.0583    0.1020    0.1638
Pt    0.2041    0.0392    0.1226
Pt    0.0825    0.9980    0.1251
Pt    0.0595    0.0639    0.2075
Pt    0.1419    0.1855    0.1658
Pt    0.0607    0.0627    0.1658
Pt    0.1438    0.1431    0.2073
Pt    0.0398    0.1641    0.1222
Pt    0.1036    0.0164    0.2052
Pt    0.0586    0.0191    0.2062
Pt    0.0390    0.0412    0.1644
Pt    0.0357    0.0394    0.2061
Pt    0.0601    0.0196    0.1660
Pt    0.0382    0.0813    0.1628
Pt    0.0378    0.0825    0.2051
Pt    0.0154    0.2262    0.2121
Pt    0.0406    0.1238    0.1629
Pt    0.0386    0.1213    0.2083
Pt    0.0174    0.2279    0.1642
Pt    0.0414    0.1666    0.1677
Pt    0.0421    0.1652    0.2072
Pt    0.0186    0.1833    0.2087
Pt    0.0385    0.2066    0.1628
Pt    0.0390    0.2095    0.2091
Pt    0.0185    0.1853    0.1663
Pt    0.1457    0.1472    0.1660
Pt    0.0212    0.1451    0.2074
Pt    0.1420    0.1032    0.2066
Pt    0.1459    0.0182    0.1233
Pt    0.0615    0.9984    0.1879
Pt    0.0184    0.1437    0.1654
Pt    0.0786    0.0389    0.1657
Pt    0.0784    0.0401    0.2055
Pt    0.0173    0.1007    0.2056
Pt    0.0823    0.0802    0.1648
Pt    0.0808    0.0806    0.2075
Pt    0.0194    0.1043    0.1657
Pt    0.0774    0.1221    0.1635
Pt    0.0793    0.1206    0.2036
Pt    0.0159    0.0586    0.2060
Pt    0.0824    0.1645    0.1650
Pt    0.0806    0.1676    0.2081
Pt    0.0197    0.0612    0.1638
Pt    0.0816    0.2031    0.1696
Pt    0.0791    0.2056    0.2099
Pt    0.0186    0.0170    0.2050
Pt    0.1445    0.1013    0.1660
Pt    0.0167    0.0144    0.1643
Pt    0.1421    0.0608    0.2064
Pt    0.0405    0.0422    0.1243
Pt    0.9987    0.0174    0.1853
Pt    0.0581    0.1891    0.2082
Pt    0.1235    0.0403    0.1637
Pt    0.1233    0.0388    0.2053
Pt    0.0594    0.2288    0.1667
Pt    0.1228    0.0805    0.1664
Pt    0.1231    0.0818    0.2075
Pt    0.2264    0.2056    0.2280
Pt    0.1207    0.1254    0.1659
Pt    0.1207    0.1240    0.2043
Pt    0.2267    0.2067    0.1870
Pt    0.1224    0.1651    0.1659
Pt    0.1221    0.1642    0.2089
Pt    0.2301    0.2068    0.1464
Pt    0.1254    0.2080    0.1622
Pt    0.1222    0.2064    0.2090
Pt    0.2260    0.1639    0.2258
Pt    0.1472    0.0568    0.1669
Pt    0.2265    0.1681    0.1841
Pt    0.1434    0.0177    0.2074
Pt    0.9990    0.1852    0.1454
Pt    0.1248    0.2085    0.1241
Pt    0.2251    0.1656    0.1445
Pt    0.1663    0.0378    0.1642
Pt    0.1642    0.0398    0.2083
Pt    0.2266    0.1208    0.2255
Pt    0.1667    0.0809    0.1685
Pt    0.1625    0.0810    0.2051
Pt    0.2278    0.1222    0.1862
Pt    0.1648    0.1227    0.1642
Pt    0.1642    0.1201    0.2069
Pt    0.2283    0.1219    0.1434
Pt    0.1643    0.1674    0.1691
Pt    0.1659    0.1646    0.2091
Pt    0.2258    0.0801    0.2305
Pt    0.1628    0.2063    0.1658
Pt    0.1630    0.2086    0.2072
Pt    0.2273    0.0785    0.1875
Pt    0.1443    0.0185    0.1632
Pt    0.2246    0.0841    0.1453
Pt    0.0993    0.2271    0.2077
Pt    0.0999    0.0571    0.1655
Pt    0.9996    0.2260    0.1859
Pt    0.2282    0.0373    0.2301
Pt    0.2062    0.0397    0.1667
Pt    0.2074    0.0379    0.2081
Pt    0.2270    0.0392    0.1848
Pt    0.2067    0.0801    0.1653
Pt    0.2074    0.0793    0.2064
Pt    0.2259    0.0406    0.1429
Pt    0.2058    0.1239    0.1650
Pt    0.2062    0.1250    0.2044
Pt    0.1410    0.1241    0.1857
Pt    0.2070    0.1667    0.1638
Pt    0.2049    0.1623    0.2078
Pt    0.9987    0.0808    0.1629
Pt    0.2075    0.2094    0.1663
Pt    0.2057    0.2078    0.2059
Pt    0.1044    0.1888    0.1240
Pt    0.1027    0.2273    0.1641
Pt    0.0603    0.2253    0.2047
Pt    0.1024    0.1848    0.2083
Pt    0.1038    0.0172    0.1649
Pt    0.2287    0.1857    0.2069
Pt    0.2286    0.1876    0.1642
Pt    0.1850    0.2056    0.2229
Pt    0.2299    0.1454    0.2039
Pt    0.2274    0.1446    0.1651
Pt    0.1839    0.2064    0.1869
Pt    0.2253    0.0996    0.2076
Pt    0.2250    0.1021    0.1666
Pt    0.1864    0.2063    0.1459
Pt    0.2273    0.0582    0.2089
Pt    0.2292    0.0607    0.1654
Pt    0.1866    0.1648    0.2293
Pt    0.2292    0.0182    0.2079
Pt    0.2251    0.0194    0.1635
Pt    0.1832    0.1632    0.1865
Pt    0.1865    0.2273    0.2055
Pt    0.1842    0.2264    0.1667
Pt    0.1842    0.1671    0.1454
Pt    0.1864    0.1838    0.2053
Pt    0.1651    0.0411    0.1238
Pt    0.1424    0.1222    0.2272
Pt    0.1432    0.1222    0.1455
Pt    0.1431    0.0839    0.2278
Pt    0.1434    0.0810    0.1849
Pt    0.0601    0.2251    0.1247
Pt    0.1034    0.0602    0.2052
Pt    0.1847    0.0391    0.1458
Pt    0.1008    0.1027    0.1641
Pt    0.1007    0.2084    0.2284
Pt    0.1448    0.0794    0.1467
Pt    0.1019    0.2065    0.1864
Pt    0.1025    0.2071    0.1443
Pt    0.1023    0.1643    0.2281
Pt    0.1004    0.1644    0.1859
Pt    0.1419    0.0409    0.2266
Pt    0.1020    0.1663    0.1443
Pt    0.1030    0.1221    0.2248
Pt    0.1012    0.1232    0.1840
Pt    0.0388    0.0201    0.1444
Pt    0.0405    0.0193    0.1857
Pt    0.0425    0.0178    0.2269
Pt    0.0437    0.0601    0.1452
Pt    0.0387    0.0616    0.1851
Pt    0.0376    0.0600    0.2263
Pt    0.0381    0.1045    0.1434
Pt    0.0382    0.1045    0.1860
Pt    0.0396    0.1021    0.2259
Pt    0.0397    0.1455    0.1442
Pt    0.0416    0.1419    0.1856
Pt    0.0381    0.1454    0.2292
Pt    0.0368    0.1836    0.1439
Pt    0.0364    0.1865    0.1893
Pt    0.0404    0.1850    0.2282
Pt    0.0387    0.2279    0.1451
Pt    0.0367    0.2264    0.1849
Pt    0.0381    0.2278    0.2295
Pt    0.0799    0.0196    0.1448
Pt    0.0820    0.0193    0.1839
Pt    0.0803    0.0170    0.2263
Pt    0.0805    0.0593    0.1460
Pt    0.0789    0.0594    0.1877
Pt    0.0830    0.0588    0.2279
Pt    0.0808    0.1022    0.1457
Pt    0.0815    0.1009    0.1856
Pt    0.0806    0.1038    0.2259
Pt    0.0801    0.1450    0.1441
Pt    0.0810    0.1437    0.1855
Pt    0.0832    0.1441    0.2281
Pt    0.0818    0.1867    0.1452
Pt    0.0785    0.1864    0.1899
Pt    0.0816    0.1872    0.2311
Pt    0.0783    0.2261    0.1472
Pt    0.0810    0.2286    0.1827
Pt    0.0788    0.2303    0.2294
Pt    0.1232    0.0187    0.1463
Pt    0.1238    0.0187    0.1834
Pt    0.1215    0.0185    0.2271
Pt    0.1213    0.0623    0.1466
Pt    0.1221    0.0609    0.1835
Pt    0.1216    0.0623    0.2293
Pt    0.1223    0.1009    0.1478
Pt    0.1220    0.1033    0.1849
Pt    0.1217    0.1020    0.2249
Pt    0.1251    0.1421    0.1459
Pt    0.1223    0.1465    0.1871
Pt    0.1240    0.1438    0.2283
Pt    0.1248    0.1853    0.1430
Pt    0.1228    0.1868    0.1887
Pt    0.1203    0.1857    0.2317
Pt    0.1221    0.2303    0.1445
Pt    0.1203    0.2276    0.1855
Pt    0.1219    0.2277    0.2285
Pt    0.1650    0.0167    0.1432
Pt    0.1658    0.0193    0.1875
Pt    0.1651    0.0175    0.2278
Pt    0.1650    0.0604    0.1439
Pt    0.1630    0.0586    0.1872
Pt    0.1642    0.0630    0.2260
Pt    0.1638    0.1018    0.1455
Pt    0.1637    0.1034    0.1847
Pt    0.1629    0.1028    0.2279
Pt    0.1660    0.1463    0.1460
Pt    0.1637    0.1416    0.1874
Pt    0.1643    0.1442    0.2280
Pt    0.1637    0.1858    0.1450
Pt    0.1627    0.1874    0.1893
Pt    0.1648    0.1862    0.2258
Pt    0.1652    0.2269    0.1468
Pt    0.1626    0.2310    0.1858
Pt    0.1663    0.2277    0.2308
Pt    0.2078    0.0198    0.1416
Pt    0.2081    0.0166    0.1875
Pt    0.2081    0.0156    0.2270
Pt    0.2082    0.0609    0.1452
Pt    0.2053    0.0584    0.1884
Pt    0.2071    0.0576    0.2288
Pt    0.2054    0.1029    0.1430
Pt    0.2043    0.0996    0.1858
Pt    0.2048    0.1029    0.2261
Pt    0.2057    0.1444    0.1457
Pt    0.2052    0.1449    0.1851
Pt    0.2073    0.1409    0.2268
Pt    0.2079    0.1878    0.1467
Pt    0.2059    0.1880    0.1864
Pt    0.2062    0.1854    0.2273
Pt    0.2087    0.2279    0.1435
Pt    0.2065    0.2294    0.1851
Pt    0.2088    0.2277    0.2257
Pt    0.1843    0.1868    0.1667
Pt    0.1825    0.1227    0.2272
Pt    0.1834    0.1437    0.2084
Pt    0.1842    0.1423    0.1659
Pt    0.1862    0.1212    0.1879
Pt    0.1834    0.0982    0.2092
Pt    0.1870    0.1039    0.1659
Pt    0.1838    0.1240    0.1451
Pt    0.1830    0.0602    0.2070
Pt    0.1868    0.0596    0.1647
Pt    0.1855    0.0795    0.2295
Pt    0.1859    0.0173    0.2092
Pt    0.1843    0.0189    0.1651
Pt    0.1840    0.0798    0.1886
Pt    0.1426    0.2292    0.2071
Pt    0.1422    0.2276    0.1647
Pt    0.1859    0.0809    0.1455
Pt    0.1432    0.1868    0.2084
Pt    0.1442    0.2073    0.1419
Pt    0.1444    0.0383    0.1861
Pt    0.0186    0.9994    0.2259
Pt    0.0176    0.0397    0.1442
Pt    0.0193    0.0402    0.1843
Pt    0.0184    0.0358    0.2261
Pt    0.0212    0.0827    0.1423
Pt    0.0162    0.0796    0.1852
Pt    0.0172    0.0804    0.2244
Pt    0.0169    0.1252    0.1435
Pt    0.0154    0.1234    0.1872
Pt    0.0171    0.1232    0.2255
Pt    0.0176    0.1638    0.1438
Pt    0.0188    0.1650    0.1881
Pt    0.0166    0.1638    0.2288
Pt    0.0173    0.2074    0.1424
Pt    0.0184    0.2064    0.1875
Pt    0.0187    0.2033    0.2294
Pt    0.1027    0.1859    0.1671
Pt    0.1862    0.0388    0.2270
Pt    0.1010    0.1435    0.2056
Pt    0.1456    0.0403    0.1441
Pt    0.1445    0.1671    0.1875
Pt    0.1431    0.2057    0.2301
Pt    0.0580    0.0384    0.1435
Pt    0.0578    0.0418    0.1861
Pt    0.0613    0.0411    0.2262
Pt    0.0608    0.0833    0.1424
Pt    0.0611    0.0818    0.1855
Pt    0.0606    0.0812    0.2275
Pt    0.0602    0.1252    0.1408
Pt    0.0597    0.1219    0.1864
Pt    0.0591    0.1262    0.2283
Pt    0.0596    0.1658    0.1458
Pt    0.0597    0.1634    0.1877
Pt    0.0614    0.1661    0.2304
Pt    0.0596    0.2035    0.1470
Pt    0.0553    0.2058    0.1863
Pt    0.0596    0.2092    0.2292
Pt    0.1016    0.1429    0.1650
Pt    0.1881    0.0361    0.1859
Pt    0.1011    0.1005    0.2047
Pt    0.1427    0.1640    0.2258
Pt    0.1410    0.2079    0.1863
Pt    0.1440    0.1669    0.1451
Pt    0.0998    0.0389    0.1434
Pt    0.1031    0.0366    0.1855
Pt    0.1009    0.0384    0.2242
Pt    0.1005    0.0803    0.1444
Pt    0.1030    0.0820    0.1861
Pt    0.1005    0.0818    0.2284
Pt    0.1014    0.1232    0.1436
Pt    0.2072    0.9971    0.2071
Pt    0.2044    0.1233    0.1248
Pt    0.0389    0.0822    0.1228
Pt    0.1854    0.0170    0.1224
Pt    0.1440    0.1018    0.1258
Pt    0.1627    0.1666    0.1259
Pt    0.0389    0.9978    0.2046
Pt    0.1204    0.1645    0.1241
Pt    0.0811    0.0395    0.1224
Pt    0.9980    0.0585    0.1840
Pt    0.0399    0.0020    0.1229
Pt    0.0826    0.9989    0.2063
Pt    0.0178    0.1455    0.1235
Pt    0.1861    0.0596    0.1256
Pt    0.0372    0.1233    0.1227
Pt    0.1199    0.0405    0.2463
Pt    0.1875    0.1874    0.1262
Pt    0.2299    0.9976    0.2288
Pt    0.2266    0.1432    0.2460
Pt    0.1872    0.1433    0.1258
Pt    0.9989    0.0360    0.1632
Pt    0.9975    0.1213    0.1667
Pt    0.1658    0.0800    0.1261
Pt    0.9966    0.1646    0.2077
Pt    0.9989    0.0817    0.1240
Pt    0.9972    0.1011    0.1453
Pt    0.0145    0.1009    0.2450
Pt    0.1009    0.2291    0.1253
Pt    0.0188    0.2278    0.1232
Pt    0.1635    0.9983    0.2082
Pt    0.1627    0.1257    0.1243
Pt    0.1880    0.9982    0.1427
Pt    0.0819    0.2064    0.1226
Pt    0.0402    0.9972    0.1637
Pt    0.9976    0.0368    0.2062
Pt    0.1878    0.2259    0.1228
Pt    0.2284    0.1863    0.1271
Pt    0.1421    0.9996    0.2294
Pt    0.0181    0.1834    0.1241
Pt    0.0606    0.1451    0.1219
Pt    0.1477    0.2298    0.1224
Pt    0.1018    0.1028    0.1252
Pt    0.2246    0.1431    0.1252
Pt    0.1249    0.0806    0.1257
Pt    0.2062    0.9984    0.1652
Pt    0.1876    0.9986    0.1850
Pt    0.1659    0.2086    0.1238
Pt    0.1821    0.1057    0.1236
Pt    0.0798    0.9969    0.1636
Pt    0.0823    0.1237    0.1228
Pt    0.2051    0.0821    0.1230
Pt    0.0821    0.1657    0.1234
Pt    0.2266    0.9970    0.1433
Pt    0.2274    0.0614    0.1245
Pt    0.1434    0.1468    0.1245
Pt    0.1429    0.0595    0.1237
Pt    0.1227    0.9978    0.1653
Pt    0.1655    0.9982    0.1651
Pt    0.0599    0.0194    0.1230
Pt    0.0381    0.2060    0.1231
Pt    0.0178    0.0198    0.1236
Pt    0.0776    0.2457    0.1264
Pt    0.0812    0.0819    0.1231
Pt    0.0194    0.0602    0.1231
Pt    0.2068    0.1666    0.1235
Pt    0.1446    0.2465    0.2285
Pt    0.1885    0.2260    0.2455
Pt    0.1233    0.0378    0.1263
Pt    0.1239    0.1227    0.1250
Pt    0.0159    0.0572    0.2436
Pt    0.9969    0.0981    0.1852
Pt    0.1039    0.0601    0.1219
Pt    0.1008    0.0180    0.1225
Pt    0.9979    0.1660    0.1238
Pt    0.1005    0.1459    0.1252
Pt    0.9976    0.1249    0.1237
Pt    0.2459    0.1441    0.1433
Pt    0.1659    0.0392    0.2463
Pt    0.2460    0.1211    0.2046
Pt    0.0362    0.2448    0.2046
Pt    0.0599    0.9969    0.2245
Pt    0.2457    0.0193    0.1430
Pt    0.1850    0.2463    0.1407
Pt    0.0811    0.0393    0.2465
Pt    0.0402    0.0387    0.2449
Pt    0.0840    0.1232    0.2463
Pt    0.9968    0.2073    0.1217
Pt    0.2288    0.2246    0.1219
Pt    0.2251    0.1034    0.1216
Pt    0.1869    0.1858    0.2932
Pt    0.2221    0.2280    0.3307
Pt    0.2255    0.2281    0.2890
Pt    0.2070    0.9969    0.3364
Pt    0.2054    0.2036    0.2480
Pt    0.1849    0.1430    0.3331
Pt    0.0371    0.2073    0.2495
Pt    0.1007    0.9988    0.2667
Pt    0.1840    0.1451    0.2877
Pt    0.2297    0.1840    0.2474
Pt    0.0569    0.1021    0.2492
Pt    0.9973    0.1208    0.3293
Pt    0.1015    0.0001    0.3552
Pt    0.1423    0.2248    0.2502
Pt    0.1840    0.1006    0.3332
Pt    0.1430    0.0207    0.2473
Pt    0.9980    0.0355    0.3301
Pt    0.2274    0.1839    0.3329
Pt    0.2231    0.1841    0.2927
Pt    0.9968    0.0985    0.3509
Pt    0.1210    0.9970    0.2913
Pt    0.1841    0.1031    0.2876
Pt    0.0391    0.0387    0.2897
Pt    0.0374    0.0387    0.3311
Pt    0.1856    0.0607    0.3295
Pt    0.0376    0.0782    0.2889
Pt    0.0408    0.0819    0.3300
Pt    0.0372    0.1202    0.2882
Pt    0.0381    0.1219    0.3354
Pt    0.0354    0.1655    0.2880
Pt    0.0365    0.1657    0.3362
Pt    0.0392    0.2053    0.2917
Pt    0.0360    0.2089    0.3367
Pt    0.1637    0.2064    0.2490
Pt    0.2281    0.0598    0.2913
Pt    0.0818    0.9986    0.2903
Pt    0.1641    0.1234    0.2498
Pt    0.1807    0.0581    0.2890
Pt    0.0818    0.0391    0.2929
Pt    0.0803    0.0392    0.3311
Pt    0.0810    0.0810    0.2926
Pt    0.0809    0.0805    0.3308
Pt    0.0827    0.1239    0.2883
Pt    0.0802    0.1198    0.3329
Pt    0.0810    0.1630    0.2911
Pt    0.0800    0.1662    0.3314
Pt    0.0786    0.2059    0.2893
Pt    0.0783    0.2051    0.3359
Pt    0.9974    0.2275    0.2717
Pt    0.1428    0.9971    0.3112
Pt    0.1842    0.0193    0.3359
Pt    0.1217    0.2087    0.2521
Pt    0.1020    0.1881    0.2530
Pt    0.1855    0.0173    0.2916
Pt    0.1218    0.0383    0.2911
Pt    0.1216    0.0370    0.3321
Pt    0.1226    0.0789    0.2899
Pt    0.1237    0.0770    0.3337
Pt    0.1222    0.1247    0.2920
Pt    0.1226    0.1229    0.3335
Pt    0.9993    0.0150    0.3482
Pt    0.1221    0.1639    0.2934
Pt    0.1232    0.1630    0.3357
Pt    0.1379    0.2301    0.3337
Pt    0.1192    0.2076    0.2935
Pt    0.1181    0.2063    0.3344
Pt    0.1434    0.2235    0.2901
Pt    0.0604    0.0188    0.2494
Pt    0.1858    0.9991    0.3134
Pt    0.1423    0.1846    0.3344
Pt    0.1447    0.0593    0.2482
Pt    0.2095    0.1670    0.2473
Pt    0.2256    0.0182    0.3350
Pt    0.1608    0.0382    0.2896
Pt    0.1646    0.0409    0.3332
Pt    0.1633    0.0799    0.2880
Pt    0.1634    0.0809    0.3320
Pt    0.1616    0.1230    0.2914
Pt    0.1627    0.1219    0.3351
Pt    0.1436    0.1862    0.2941
Pt    0.1645    0.1662    0.2957
Pt    0.1657    0.1646    0.3328
Pt    0.1450    0.1449    0.3361
Pt    0.1662    0.2069    0.2916
Pt    0.1576    0.2073    0.3350
Pt    0.1424    0.1445    0.2908
Pt    0.1643    0.9973    0.3320
Pt    0.1443    0.0014    0.3563
Pt    0.1420    0.1004    0.3312
Pt    0.9978    0.1193    0.2889
Pt    0.1019    0.9983    0.3131
Pt    0.2036    0.0414    0.2889
Pt    0.2047    0.0401    0.3342
Pt    0.2058    0.0795    0.2892
Pt    0.2052    0.0808    0.3313
Pt    0.2034    0.1238    0.2878
Pt    0.2044    0.1211    0.3330
Pt    0.1419    0.1019    0.2899
Pt    0.2061    0.1623    0.2919
Pt    0.2060    0.1602    0.3353
Pt    0.1410    0.0562    0.3356
Pt    0.2038    0.2083    0.2907
Pt    0.2020    0.2056    0.3363
Pt    0.1432    0.0592    0.2887
Pt    0.1022    0.2286    0.2512
Pt    0.0563    0.2288    0.2506
Pt    0.1431    0.0182    0.3316
Pt    0.1435    0.0128    0.2875
Pt    0.2238    0.0197    0.2900
Pt    0.1840    0.1446    0.2493
Pt    0.2255    0.1391    0.3354
Pt    0.0178    0.9971    0.3503
Pt    0.9969    0.0161    0.3087
Pt    0.0966    0.2285    0.3348
Pt    0.1430    0.1440    0.2476
Pt    0.9983    0.1873    0.3542
Pt    0.0976    0.2324    0.2899
Pt    0.0602    0.0612    0.2482
Pt    0.2451    0.1839    0.3110
Pt    0.2260    0.2281    0.2490
Pt    0.1233    0.0825    0.2477
Pt    0.1032    0.1026    0.2468
Pt    0.1002    0.1852    0.3340
Pt    0.1627    0.0839    0.2485
Pt    0.1865    0.1032    0.2501
Pt    0.1013    0.1865    0.2921
Pt    0.1221    0.1631    0.2494
Pt    0.9993    0.1635    0.3313
Pt    0.0801    0.9986    0.3325
Pt    0.9973    0.2239    0.3520
Pt    0.1839    0.9986    0.3540
Pt    0.0172    0.1838    0.2496
Pt    0.1228    0.1236    0.2466
Pt    0.0397    0.1666    0.2482
Pt    0.2434    0.1829    0.3543
Pt    0.0152    0.0184    0.3709
Pt    0.0560    0.1016    0.2883
Pt    0.2451    0.2236    0.3491
Pt    0.0605    0.0614    0.3304
Pt    0.2441    0.0190    0.3116
Pt    0.9977    0.1439    0.3114
Pt    0.1415    0.1031    0.2477
Pt    0.1427    0.1821    0.2490
Pt    0.2253    0.1402    0.2896
Pt    0.0374    0.0198    0.2676
Pt    0.0376    0.0196    0.3083
Pt    0.0390    0.0201    0.3536
Pt    0.0393    0.0585    0.2661
Pt    0.0386    0.0612    0.3102
Pt    0.0379    0.0628    0.3492
Pt    0.0353    0.1020    0.2684
Pt    0.0347    0.1000    0.3102
Pt    0.0403    0.1047    0.3587
Pt    0.0399    0.1435    0.2718
Pt    0.0402    0.1418    0.3106
Pt    0.0540    0.1309    0.3556
Pt    0.0382    0.1858    0.2684
Pt    0.0374    0.1833    0.3133
Pt    0.0391    0.2279    0.2710
Pt    0.0361    0.2281    0.3102
Pt    0.0370    0.2295    0.3551
Pt    0.0774    0.0179    0.2693
Pt    0.0817    0.0183    0.3106
Pt    0.0828    0.0211    0.3542
Pt    0.0810    0.0622    0.2698
Pt    0.0824    0.0609    0.3123
Pt    0.0807    0.0597    0.3508
Pt    0.0786    0.1012    0.2690
Pt    0.0834    0.1014    0.3103
Pt    0.0735    0.1113    0.3603
Pt    0.0816    0.1438    0.2692
Pt    0.0821    0.1424    0.3126
Pt    0.0800    0.1431    0.3514
Pt    0.0797    0.1861    0.2708
Pt    0.0797    0.1836    0.3099
Pt    0.0814    0.1838    0.3561
Pt    0.0782    0.2300    0.2684
Pt    0.0758    0.2259    0.3126
Pt    0.0737    0.2262    0.3572
Pt    0.1208    0.0187    0.2672
Pt    0.1244    0.0174    0.3108
Pt    0.1215    0.0186    0.3551
Pt    0.1190    0.0601    0.2697
Pt    0.1206    0.0590    0.3115
Pt    0.1216    0.1014    0.2693
Pt    0.1211    0.1008    0.3080
Pt    0.1227    0.0997    0.3508
Pt    0.1197    0.1439    0.2705
Pt    0.1214    0.1444    0.3124
Pt    0.1236    0.1446    0.3561
Pt    0.1230    0.1868    0.2727
Pt    0.1203    0.1856    0.3147
Pt    0.1203    0.1836    0.3548
Pt    0.1226    0.2273    0.2713
Pt    0.1188    0.2297    0.3122
Pt    0.1188    0.2299    0.3543
Pt    0.1628    0.0142    0.2669
Pt    0.1643    0.0187    0.3121
Pt    0.1644    0.0221    0.3558
Pt    0.1627    0.0602    0.2662
Pt    0.1628    0.0577    0.3096
Pt    0.1653    0.0632    0.3511
Pt    0.1607    0.1030    0.2703
Pt    0.1648    0.1017    0.3110
Pt    0.1641    0.0989    0.3535
Pt    0.1642    0.1471    0.2686
Pt    0.1631    0.1458    0.3131
Pt    0.1654    0.1441    0.3554
Pt    0.1665    0.1851    0.2733
Pt    0.1623    0.1879    0.3160
Pt    0.1591    0.1876    0.3565
Pt    0.1626    0.2261    0.2706
Pt    0.1606    0.2255    0.3161
Pt    0.1587    0.2287    0.3538
Pt    0.2049    0.0194    0.2691
Pt    0.2068    0.0156    0.3134
Pt    0.2073    0.0599    0.2685
Pt    0.2064    0.0612    0.3086
Pt    0.2051    0.1019    0.2700
Pt    0.2027    0.1023    0.3122
Pt    0.2064    0.1002    0.3546
Pt    0.2065    0.1457    0.2668
Pt    0.2048    0.1417    0.3129
Pt    0.2059    0.1391    0.3557
Pt    0.2053    0.1839    0.2686
Pt    0.2040    0.1840    0.3159
Pt    0.2040    0.1834    0.3517
Pt    0.2061    0.2257    0.2684
Pt    0.2037    0.2275    0.3099
Pt    0.2024    0.2263    0.3529
Pt    0.1011    0.1409    0.3327
Pt    0.0611    0.0605    0.2907
Pt    0.2257    0.1026    0.3319
Pt    0.2260    0.1057    0.2877
Pt    0.1007    0.0599    0.2493
Pt    0.9982    0.0985    0.3109
Pt    0.2279    0.0592    0.3305
Pt    0.1006    0.0626    0.2907
Pt    0.1019    0.0199    0.3344
Pt    0.0570    0.9992    0.3091
Pt    0.1037    0.0171    0.2911
Pt    0.0573    0.2291    0.3343
Pt    0.0591    0.0224    0.3311
Pt    0.0395    0.9986    0.2468
Pt    0.0180    0.9988    0.2678
Pt    0.2253    0.1032    0.2482
Pt    0.0575    0.0182    0.2875
Pt    0.0190    0.1432    0.3345
Pt    0.0166    0.2309    0.3335
Pt    0.0202    0.1434    0.2492
Pt    0.0602    0.1426    0.2508
Pt    0.0173    0.0390    0.2659
Pt    0.0160    0.0380    0.3094
Pt    0.0172    0.0384    0.3509
Pt    0.0178    0.0799    0.2655
Pt    0.0157    0.0765    0.3083
Pt    0.0225    0.0862    0.3561
Pt    0.0174    0.1235    0.2691
Pt    0.0186    0.1255    0.3117
Pt    0.0164    0.1191    0.3517
Pt    0.0187    0.1651    0.2668
Pt    0.0212    0.1617    0.3113
Pt    0.0154    0.1644    0.3535
Pt    0.0161    0.2046    0.2695
Pt    0.0177    0.2044    0.3103
Pt    0.1029    0.1439    0.2924
Pt    0.0585    0.2306    0.2918
Pt    0.1822    0.2240    0.3321
Pt    0.0587    0.1833    0.3366
Pt    0.1210    0.9995    0.2485
Pt    0.0586    0.1855    0.2912
Pt    0.0612    0.0420    0.2685
Pt    0.0589    0.0414    0.3107
Pt    0.0573    0.0405    0.3503
Pt    0.0586    0.0809    0.2666
Pt    0.0589    0.0831    0.3089
Pt    0.0626    0.0830    0.3504
Pt    0.0608    0.1236    0.2714
Pt    0.0598    0.1215    0.3105
Pt    0.0600    0.1624    0.2702
Pt    0.0574    0.1640    0.3101
Pt    0.0597    0.1628    0.3552
Pt    0.0586    0.2081    0.2699
Pt    0.0565    0.2053    0.3146
Pt    0.1840    0.2287    0.2909
Pt    0.9972    0.0787    0.3303
Pt    0.0172    0.2286    0.2918
Pt    0.0584    0.1456    0.3325
Pt    0.0542    0.0007    0.3499
Pt    0.0363    0.0441    0.3689
Pt    0.1008    0.0391    0.2699
Pt    0.1011    0.0375    0.3121
Pt    0.1011    0.0405    0.3550
Pt    0.1009    0.0827    0.2686
Pt    0.1037    0.0815    0.3124
Pt    0.1012    0.0787    0.3527
Pt    0.1023    0.1214    0.2682
Pt    0.1020    0.1222    0.3127
Pt    0.1005    0.1181    0.3555
Pt    0.1015    0.1664    0.2715
Pt    0.0999    0.1626    0.3121
Pt    0.0988    0.1645    0.3530
Pt    0.0999    0.2080    0.2714
Pt    0.0968    0.2073    0.3124
Pt    0.0983    0.2081    0.3557
Pt    0.1009    0.1006    0.3338
Pt    0.0385    0.0829    0.2483
Pt    0.0815    0.1683    0.2513
Pt    0.1007    0.0204    0.2471
Pt    0.2073    0.9986    0.2900
Pt    0.0157    0.1429    0.2905
Pt    0.1393    0.0390    0.2692
Pt    0.1428    0.0390    0.3102
Pt    0.1407    0.0370    0.3534
Pt    0.1429    0.0807    0.2693
Pt    0.1427    0.0784    0.3092
Pt    0.1437    0.0783    0.3570
Pt    0.1405    0.1245    0.2698
Pt    0.1427    0.1246    0.3134
Pt    0.1431    0.1196    0.3552
Pt    0.1427    0.1648    0.2714
Pt    0.1418    0.1655    0.3127
Pt    0.1417    0.1660    0.3559
Pt    0.1431    0.2046    0.2702
Pt    0.1380    0.2089    0.3140
Pt    0.1382    0.2054    0.3578
Pt    0.1231    0.9984    0.3324
Pt    0.0164    0.2287    0.2497
Pt    0.2308    0.0592    0.2477
Pt    0.0612    0.1436    0.2904
Pt    0.9985    0.1415    0.3542
Pt    0.0605    0.1861    0.2500
Pt    0.1847    0.0391    0.2691
Pt    0.1846    0.0377    0.3102
Pt    0.1839    0.0777    0.2694
Pt    0.1841    0.0835    0.3100
Pt    0.1892    0.0769    0.3525
Pt    0.1847    0.1253    0.2687
Pt    0.1835    0.1254    0.3078
Pt    0.1839    0.1197    0.3550
Pt    0.1844    0.1655    0.2708
Pt    0.1853    0.1630    0.3125
Pt    0.1829    0.1645    0.3546
Pt    0.1850    0.2086    0.2685
Pt    0.1838    0.2069    0.3116
Pt    0.1814    0.2062    0.3551
Pt    0.9971    0.1843    0.3092
Pt    0.2272    0.0189    0.2516
Pt    0.1861    0.0574    0.2483
Pt    0.0811    0.0814    0.2489
Pt    0.0187    0.1866    0.3355
Pt    0.1820    0.1865    0.3336
Pt    0.2269    0.0391    0.2716
Pt    0.2223    0.0380    0.3105
Pt    0.2256    0.0424    0.3527
Pt    0.2262    0.0816    0.2688
Pt    0.2275    0.0822    0.3103
Pt    0.2283    0.0765    0.3505
Pt    0.2245    0.1220    0.2681
Pt    0.2229    0.1209    0.3097
Pt    0.2270    0.1184    0.3576
Pt    0.2267    0.1620    0.2696
Pt    0.2249    0.1611    0.3138
Pt    0.2248    0.1630    0.3562
Pt    0.2253    0.2059    0.2696
Pt    0.2218    0.2053    0.3122
Pt    0.2230    0.2039    0.3520
Pt    0.0160    0.1849    0.2902
Pt    0.0596    0.1050    0.3361
Pt    0.9966    0.1626    0.2498
Pt    0.0161    0.0177    0.2878
Pt    0.0189    0.0174    0.3278
Pt    0.0995    0.1038    0.2890
Pt    0.0179    0.0589    0.2854
Pt    0.0189    0.0603    0.3298
Pt    0.1020    0.0575    0.3339
Pt    0.0167    0.0954    0.2889
Pt    0.0180    0.0978    0.3308
Pt    0.1876    0.9976    0.2692
Pt    0.1865    0.0187    0.2471
Pt    0.1848    0.1862    0.2473
Pt    0.2445    0.1640    0.2918
Pt    0.2080    0.0375    0.2477
Pt    0.9974    0.9972    0.3692
Pt    0.9994    0.0582    0.3491
Pt    0.0596    0.0624    0.3711
Pt    0.2047    0.1230    0.2481
Pt    0.9972    0.2049    0.3306
Pt    0.2450    0.0173    0.3562
Pt    0.0798    0.2103    0.2507
Pt    0.2242    0.9971    0.3570
Pt    0.0584    0.9971    0.2693
Pt    0.2458    0.1435    0.3547
Pt    0.1643    0.1663    0.2478
Pt    0.2053    0.0820    0.2483
Pt    0.2437    0.2056    0.3708
Pt    0.2451    0.2272    0.3105
Pt    0.1011    0.1438    0.2479
Pt    0.2281    0.9981    0.3096
Pt    0.2425    0.2066    0.2907
Pt    0.2449    0.1021    0.3104
Pt    0.2238    0.2272    0.3698
Pt    0.9973    0.1413    0.2695
Pt    0.1849    0.2447    0.2658
Pt    0.2439    0.2055    0.3285
Pt    0.2435    0.2454    0.3313
Pt    0.0369    0.1232    0.2471
Pt    0.2464    0.2268    0.2705
Pt    0.1783    0.2465    0.3148
Pt    0.1673    0.9969    0.2884
Pt    0.0181    0.0178    0.2467
Pt    0.2033    0.2036    0.4948
Pt    0.2220    0.2228    0.4564
Pt    0.2250    0.2266    0.4118
Pt    0.2237    0.2449    0.4746
Pt    0.2251    0.1391    0.3758
Pt    0.9981    0.1177    0.4151
Pt    0.0172    0.9994    0.3914
Pt    0.2376    0.0255    0.4717
Pt    0.1011    0.9971    0.4352
Pt    0.2273    0.1827    0.4539
Pt    0.2260    0.1811    0.4158
Pt    0.1630    0.1196    0.3758
Pt    0.2279    0.1418    0.4158
Pt    0.1216    0.9985    0.3722
Pt    0.1395    0.1837    0.3780
Pt    0.1195    0.1650    0.3772
Pt    0.0370    0.0420    0.4112
Pt    0.0381    0.0383    0.4535
Pt    0.1199    0.1181    0.3724
Pt    0.0383    0.0781    0.4519
Pt    0.1418    0.0966    0.4571
Pt    0.0813    0.0443    0.3752
Pt    0.2068    0.0000    0.4526
Pt    0.1429    0.1441    0.3772
Pt    0.0155    0.9993    0.4761
Pt    0.0784    0.0383    0.4556
Pt    0.0981    0.1617    0.3945
Pt    0.0795    0.0830    0.4541
Pt    0.9968    0.1197    0.3734
Pt    0.0819    0.1120    0.4534
Pt    0.1844    0.1858    0.3745
Pt    0.1817    0.1403    0.4155
Pt    0.1249    0.0760    0.4598
Pt    0.1416    0.9999    0.3904
Pt    0.1212    0.1181    0.4139
Pt    0.1215    0.1182    0.4545
Pt    0.0582    0.9981    0.4737
Pt    0.1174    0.1624    0.4134
Pt    0.0000    0.1592    0.3775
Pt    0.1201    0.2055    0.4162
Pt    0.9969    0.0994    0.4733
Pt    0.1685    0.0979    0.3944
Pt    0.1601    0.1216    0.4121
Pt    0.2024    0.1612    0.4926
Pt    0.1590    0.1645    0.4179
Pt    0.1624    0.1611    0.4569
Pt    0.0361    0.9968    0.4554
Pt    0.1616    0.2029    0.4192
Pt    0.1590    0.2063    0.4540
Pt    0.1813    0.2240    0.4956
Pt    0.2435    0.2243    0.4338
Pt    0.0801    0.9985    0.3732
Pt    0.1854    0.1417    0.3746
Pt    0.1394    0.2244    0.4146
Pt    0.2055    0.1185    0.4134
Pt    0.2043    0.1619    0.4148
Pt    0.2035    0.1620    0.4538
Pt    0.0639    0.0205    0.3739
Pt    0.2033    0.2070    0.4117
Pt    0.2035    0.2047    0.4542
Pt    0.9972    0.0374    0.4533
Pt    0.1427    0.1003    0.3751
Pt    0.0363    0.0376    0.4943
Pt    0.2281    0.1405    0.4966
Pt    0.0966    0.2295    0.3727
Pt    0.1422    0.2271    0.4958
Pt    0.1645    0.1661    0.3768
Pt    0.9972    0.0780    0.3732
Pt    0.1415    0.2268    0.3766
Pt    0.1404    0.1821    0.4958
Pt    0.1824    0.1821    0.4925
Pt    0.1810    0.2264    0.4517
Pt    0.2458    0.2260    0.3935
Pt    0.0190    0.0617    0.3730
Pt    0.1836    0.0997    0.3738
Pt    0.9971    0.0793    0.4547
Pt    0.2224    0.2263    0.4946
Pt    0.1003    0.1349    0.4494
Pt    0.2456    0.2244    0.4737
Pt    0.9985    0.2035    0.4894
Pt    0.1215    0.0752    0.4913
Pt    0.2266    0.0957    0.3743
Pt    0.9979    0.0599    0.4743
Pt    0.0179    0.0586    0.4953
Pt    0.9971    0.0973    0.3911
Pt    0.1822    0.2258    0.4160
Pt    0.2241    0.1845    0.3769
Pt    0.1818    0.1827    0.4541
Pt    0.1823    0.1788    0.4176
Pt    0.0365    0.0226    0.3883
Pt    0.0367    0.0174    0.4320
Pt    0.0382    0.0163    0.4743
Pt    0.0406    0.0643    0.3928
Pt    0.0411    0.0619    0.4299
Pt    0.0364    0.0602    0.4742
Pt    0.0373    0.0952    0.4758
Pt    0.2453    0.2055    0.4535
Pt    0.0786    0.0163    0.4332
Pt    0.0805    0.0171    0.4768
Pt    0.0777    0.0567    0.4764
Pt    0.0794    0.0978    0.4770
Pt    0.1637    0.0001    0.3746
Pt    0.1254    0.0968    0.4320
Pt    0.1169    0.1002    0.4754
Pt    0.1202    0.1409    0.3955
Pt    0.1198    0.1393    0.4331
Pt    0.1211    0.1409    0.4712
Pt    0.1183    0.1847    0.3979
Pt    0.1166    0.2286    0.3935
Pt    0.1433    0.1011    0.4112
Pt    0.1610    0.1458    0.3972
Pt    0.1625    0.1396    0.4359
Pt    0.1596    0.1381    0.4766
Pt    0.1652    0.1821    0.3973
Pt    0.1564    0.1835    0.4413
Pt    0.1599    0.1841    0.4731
Pt    0.1598    0.2264    0.3967
Pt    0.1577    0.2273    0.4354
Pt    0.1604    0.2281    0.4737
Pt    0.2063    0.0972    0.3933
Pt    0.2040    0.1414    0.3950
Pt    0.2036    0.1843    0.3954
Pt    0.2039    0.1822    0.4339
Pt    0.2076    0.1820    0.4739
Pt    0.2027    0.2275    0.3919
Pt    0.2024    0.2241    0.4347
Pt    0.2009    0.2281    0.4744
Pt    0.2225    0.2448    0.4349
Pt    0.0174    0.0163    0.4123
Pt    0.1999    0.0028    0.4914
Pt    0.1811    0.2450    0.3939
Pt    0.2028    0.2466    0.4135
Pt    0.0603    0.0590    0.4540
Pt    0.1377    0.1388    0.4964
Pt    0.2042    0.2067    0.3744
Pt    0.0777    0.1194    0.4965
Pt    0.0176    0.0613    0.4111
Pt    0.0386    0.9990    0.4106
Pt    0.1047    0.0916    0.4518
Pt    0.2033    0.2458    0.4540
Pt    0.0183    0.0177    0.4541
Pt    0.0160    0.0407    0.3918
Pt    0.0166    0.0400    0.4331
Pt    0.0159    0.0369    0.4754
Pt    0.0215    0.0832    0.3941
Pt    0.0171    0.0802    0.4323
Pt    0.0150    0.0798    0.4758
Pt    0.2317    0.0109    0.4492
Pt    0.0986    0.1860    0.3782
Pt    0.0963    0.1412    0.4960
Pt    0.9965    0.0374    0.4123
Pt    0.0581    0.0419    0.3926
Pt    0.0583    0.0400    0.4336
Pt    0.0578    0.0381    0.4724
Pt    0.0593    0.0786    0.4751
Pt    0.2431    0.1397    0.4404
Pt    0.1393    0.1853    0.4159
Pt    0.0172    0.0605    0.4533
Pt    0.0983    0.0378    0.4746
Pt    0.0988    0.0763    0.4734
Pt    0.1003    0.1133    0.4330
Pt    0.0961    0.1198    0.4767
Pt    0.1014    0.1385    0.4138
Pt    0.0991    0.2067    0.3976
Pt    0.1002    0.0564    0.4945
Pt    0.1427    0.1432    0.4539
Pt    0.1396    0.1214    0.3908
Pt    0.1449    0.1167    0.4360
Pt    0.1408    0.1184    0.4757
Pt    0.1382    0.1636    0.3975
Pt    0.1376    0.1639    0.4338
Pt    0.1387    0.1592    0.4743
Pt    0.1385    0.2055    0.3952
Pt    0.2035    0.1638    0.3759
Pt    0.0589    0.0178    0.4522
Pt    0.2188    0.0269    0.4934
Pt    0.1800    0.1395    0.4925
Pt    0.1836    0.1230    0.3935
Pt    0.1846    0.1617    0.3934
Pt    0.1822    0.1591    0.4350
Pt    0.1839    0.1609    0.4740
Pt    0.1798    0.2061    0.3960
Pt    0.1820    0.2019    0.4350
Pt    0.1810    0.2050    0.4743
Pt    0.0994    0.1371    0.3748
Pt    0.0774    0.0770    0.4960
Pt    0.0573    0.0223    0.4134
Pt    0.1411    0.1417    0.4158
Pt    0.2266    0.1178    0.3951
Pt    0.2259    0.1599    0.3941
Pt    0.2258    0.1616    0.4363
Pt    0.2229    0.1588    0.4728
Pt    0.2256    0.2054    0.3940
Pt    0.2247    0.2024    0.4326
Pt    0.2261    0.2029    0.4743
Pt    0.1184    0.2435    0.4178
Pt    0.0996    0.0968    0.4941
Pt    0.1604    0.2060    0.3754
Pt    0.2229    0.0026    0.4766
Pt    0.1617    0.1171    0.4955
Pt    0.0808    0.9987    0.4118
Pt    0.1796    0.2279    0.3726
Pt    0.2045    0.1199    0.3769
Pt    0.1174    0.2055    0.3762
Pt    0.1594    0.2054    0.4941
Pt    0.2456    0.1624    0.3759
Pt    0.0579    0.0987    0.4959
Pt    0.1176    0.1218    0.4944
Pt    0.1580    0.1616    0.4914
Pt    0.1010    0.0009    0.3945
Pt    0.0128    0.2455    0.4584
Pt    0.1399    0.0968    0.4945
Pt    0.0825    0.0340    0.4959
Pt    0.0146    0.0180    0.4963
Pt    0.0375    0.0788    0.4954
Pt    0.2274    0.1839    0.4959
Pt    0.0356    0.9976    0.3729
Pt    0.1390    0.2467    0.4365
Pt    0.2249    0.2216    0.5803
Pt    0.2208    0.2234    0.5375
Pt    0.2277    0.1796    0.5773
Pt    0.2230    0.1823    0.5359
Pt    0.2265    0.1388    0.5755
Pt    0.2252    0.1406    0.5329
Pt    0.2227    0.0041    0.5073
Pt    0.1421    0.1420    0.5369
Pt    0.1380    0.0994    0.5787
Pt    0.1400    0.1016    0.5371
Pt    0.0365    0.0373    0.5394
Pt    0.0352    0.0371    0.5801
Pt    0.0354    0.0791    0.5393
Pt    0.0365    0.0810    0.5776
Pt    0.0358    0.1225    0.5353
Pt    0.0386    0.1205    0.5777
Pt    0.0377    0.1633    0.5352
Pt    0.0376    0.1639    0.5762
Pt    0.0110    0.2014    0.5553
Pt    0.0342    0.2093    0.5719
Pt    0.1438    0.0578    0.5808
Pt    0.1402    0.0577    0.5376
Pt    0.0815    0.0367    0.5382
Pt    0.0765    0.0380    0.5830
Pt    0.0766    0.0784    0.5378
Pt    0.0790    0.0781    0.5782
Pt    0.0788    0.1188    0.5366
Pt    0.0777    0.1222    0.5763
Pt    0.0774    0.1618    0.5352
Pt    0.0765    0.1612    0.5777
Pt    0.0763    0.2042    0.5374
Pt    0.0779    0.2030    0.5803
Pt    0.0582    0.9978    0.5168
Pt    0.1250    0.0339    0.5370
Pt    0.1219    0.0368    0.5772
Pt    0.1214    0.0792    0.5347
Pt    0.1201    0.0774    0.5795
Pt    0.1187    0.1220    0.5370
Pt    0.1174    0.1199    0.5789
Pt    0.1166    0.1629    0.5333
Pt    0.1197    0.1636    0.5789
Pt    0.1262    0.2051    0.5389
Pt    0.1181    0.2021    0.5774
Pt    0.1417    0.0152    0.5780
Pt    0.1655    0.0377    0.5433
Pt    0.1623    0.0332    0.5803
Pt    0.1585    0.0796    0.5375
Pt    0.1600    0.0797    0.5780
Pt    0.1629    0.1207    0.5331
Pt    0.1634    0.1227    0.5777
Pt    0.1613    0.1618    0.5363
Pt    0.1597    0.1611    0.5760
Pt    0.1588    0.2031    0.5363
Pt    0.1608    0.2047    0.5811
Pt    0.1617    0.0784    0.6194
Pt    0.0998    0.2285    0.5772
Pt    0.1844    0.0160    0.5401
Pt    0.2077    0.0376    0.5783
Pt    0.2027    0.0791    0.5373
Pt    0.2062    0.0809    0.5766
Pt    0.2042    0.1213    0.5363
Pt    0.2024    0.1207    0.5773
Pt    0.2047    0.1596    0.5341
Pt    0.2052    0.1624    0.5754
Pt    0.2018    0.2008    0.5367
Pt    0.2054    0.1994    0.5764
Pt    0.0974    0.1826    0.5778
Pt    0.0976    0.1835    0.5362
Pt    0.2288    0.0991    0.5782
Pt    0.2245    0.0588    0.5774
Pt    0.0090    0.2298    0.4996
Pt    0.2424    0.2433    0.5812
Pt    0.1841    0.2245    0.5800
Pt    0.1846    0.2212    0.5383
Pt    0.1201    0.9978    0.5784
Pt    0.9977    0.0000    0.6180
Pt    0.1810    0.1829    0.5752
Pt    0.1835    0.1831    0.5372
Pt    0.1838    0.1424    0.5756
Pt    0.1839    0.1401    0.5324
Pt    0.1846    0.0982    0.5787
Pt    0.1831    0.0979    0.5332
Pt    0.1963    0.0176    0.5150
Pt    0.2241    0.0286    0.5200
Pt    0.1829    0.0603    0.5793
Pt    0.2458    0.0237    0.4991
Pt    0.9968    0.0591    0.5999
Pt    0.0386    0.0179    0.5169
Pt    0.0401    0.0176    0.5604
Pt    0.0362    0.0146    0.6008
Pt    0.0358    0.0571    0.5197
Pt    0.0365    0.0589    0.5605
Pt    0.0393    0.0563    0.6002
Pt    0.0348    0.0981    0.5178
Pt    0.0349    0.1009    0.5562
Pt    0.0340    0.1023    0.5994
Pt    0.0359    0.1436    0.5559
Pt    0.0342    0.1412    0.5960
Pt    0.0330    0.1855    0.5584
Pt    0.0342    0.1847    0.5949
Pt    0.0159    0.1835    0.5352
Pt    0.0319    0.2067    0.5388
Pt    0.0398    0.2242    0.5964
Pt    0.0806    0.0166    0.5167
Pt    0.0787    0.0158    0.5574
Pt    0.0760    0.0127    0.6022
Pt    0.0763    0.0593    0.5193
Pt    0.0794    0.0562    0.5600
Pt    0.0806    0.0585    0.5994
Pt    0.0775    0.0990    0.5152
Pt    0.0778    0.0992    0.5593
Pt    0.0802    0.0992    0.5976
Pt    0.0767    0.1411    0.5157
Pt    0.0783    0.1419    0.5550
Pt    0.0776    0.1410    0.5981
Pt    0.0775    0.1831    0.5573
Pt    0.0785    0.1837    0.5995
Pt    0.0767    0.2215    0.5570
Pt    0.0764    0.2261    0.5963
Pt    0.1203    0.0172    0.5588
Pt    0.1210    0.0172    0.5986
Pt    0.1215    0.0564    0.5165
Pt    0.1218    0.0565    0.5584
Pt    0.1195    0.0552    0.5997
Pt    0.1185    0.0986    0.5149
Pt    0.1198    0.0984    0.5548
Pt    0.1186    0.1012    0.5995
Pt    0.1194    0.1416    0.5161
Pt    0.1168    0.1424    0.5566
Pt    0.1196    0.1399    0.5986
Pt    0.1205    0.1849    0.5174
Pt    0.1179    0.1822    0.5577
Pt    0.1202    0.1842    0.5985
Pt    0.1207    0.2252    0.5584
Pt    0.1200    0.2258    0.6027
Pt    0.1634    0.0145    0.5602
Pt    0.1610    0.0127    0.5983
Pt    0.1611    0.0598    0.5589
Pt    0.1628    0.0594    0.5981
Pt    0.1599    0.0984    0.5147
Pt    0.1609    0.0998    0.5567
Pt    0.1605    0.0990    0.5943
Pt    0.1617    0.1421    0.5146
Pt    0.1618    0.1405    0.5573
Pt    0.1623    0.1434    0.5976
Pt    0.1614    0.1817    0.5151
Pt    0.1607    0.1837    0.5557
Pt    0.1610    0.1850    0.6000
Pt    0.1623    0.2253    0.5165
Pt    0.1610    0.2229    0.5554
Pt    0.1616    0.2252    0.5982
Pt    0.2243    0.2462    0.5166
Pt    0.2040    0.0207    0.5993
Pt    0.2065    0.0619    0.5571
Pt    0.2059    0.0587    0.5982
Pt    0.2058    0.1011    0.5582
Pt    0.2058    0.1029    0.5996
Pt    0.2048    0.1388    0.5120
Pt    0.2055    0.1408    0.5564
Pt    0.2027    0.1407    0.5983
Pt    0.2027    0.1824    0.5137
Pt    0.2043    0.1792    0.5562
Pt    0.2046    0.1828    0.5994
Pt    0.2031    0.2256    0.5162
Pt    0.2023    0.2241    0.5600
Pt    0.2046    0.2230    0.5982
Pt    0.1825    0.0580    0.5384
Pt    0.1841    0.0154    0.5818
Pt    0.2032    0.2456    0.5805
Pt    0.1382    0.2256    0.5799
Pt    0.1402    0.2271    0.5350
Pt    0.1383    0.1838    0.5796
Pt    0.1382    0.1806    0.5368
Pt    0.1394    0.1400    0.5756
Pt    0.0400    0.9996    0.5380
Pt    0.0364    0.1644    0.6179
Pt    0.1615    0.2462    0.6192
Pt    0.0977    0.1417    0.5763
Pt    0.0969    0.1408    0.5349
Pt    0.1007    0.0982    0.5750
Pt    0.0181    0.0374    0.5166
Pt    0.0141    0.0372    0.5566
Pt    0.0174    0.0375    0.6023
Pt    0.0145    0.0785    0.5160
Pt    0.0159    0.0816    0.5572
Pt    0.0154    0.0807    0.5998
Pt    0.0157    0.1228    0.5585
Pt    0.0143    0.1228    0.5970
Pt    0.0165    0.1669    0.5565
Pt    0.0147    0.1635    0.6030
Pt    0.0127    0.2048    0.5137
Pt    0.0175    0.2052    0.5986
Pt    0.0985    0.0984    0.5349
Pt    0.1000    0.0575    0.5772
Pt    0.1013    0.0565    0.5370
Pt    0.0996    0.0174    0.5802
Pt    0.0567    0.0393    0.5171
Pt    0.0593    0.0381    0.5583
Pt    0.0592    0.0346    0.6030
Pt    0.0549    0.0776    0.5191
Pt    0.0558    0.0808    0.5596
Pt    0.0566    0.0767    0.5991
Pt    0.0568    0.1193    0.5151
Pt    0.0574    0.1210    0.5537
Pt    0.0580    0.1220    0.5994
Pt    0.0583    0.1624    0.5552
Pt    0.0585    0.1642    0.5987
Pt    0.0553    0.2018    0.5550
Pt    0.0586    0.2051    0.6030
Pt    0.0989    0.2463    0.6014
Pt    0.9965    0.0220    0.6007
Pt    0.1022    0.0178    0.5375
Pt    0.1016    0.0353    0.5162
Pt    0.1001    0.0355    0.5584
Pt    0.0979    0.0349    0.6021
Pt    0.0982    0.0780    0.5142
Pt    0.1005    0.0770    0.5559
Pt    0.1002    0.0765    0.6007
Pt    0.0973    0.1193    0.5152
Pt    0.0982    0.1201    0.5559
Pt    0.0991    0.1221    0.5999
Pt    0.0965    0.1649    0.5139
Pt    0.0983    0.1623    0.5568
Pt    0.0984    0.1592    0.5974
Pt    0.0955    0.2028    0.5601
Pt    0.0988    0.2068    0.5974
Pt    0.0587    0.2240    0.5764
Pt    0.2438    0.1843    0.6006
Pt    0.1432    0.0365    0.5603
Pt    0.1438    0.0348    0.5990
Pt    0.1396    0.0754    0.5140
Pt    0.1401    0.0807    0.5590
Pt    0.1409    0.0794    0.5998
Pt    0.1382    0.1202    0.5159
Pt    0.1400    0.1197    0.5578
Pt    0.1429    0.1202    0.5969
Pt    0.1410    0.1631    0.5156
Pt    0.1370    0.1611    0.5585
Pt    0.1408    0.1606    0.5991
Pt    0.1413    0.2045    0.5149
Pt    0.1407    0.2038    0.5619
Pt    0.1381    0.2064    0.6002
Pt    0.0359    0.2453    0.6168
Pt    0.0564    0.1853    0.5783
Pt    0.0579    0.1837    0.5319
Pt    0.1859    0.0341    0.5631
Pt    0.1834    0.0388    0.5972
Pt    0.1825    0.0793    0.5577
Pt    0.1825    0.0784    0.5991
Pt    0.1819    0.1196    0.5134
Pt    0.1821    0.1202    0.5549
Pt    0.1803    0.1195    0.5973
Pt    0.1825    0.1605    0.5146
Pt    0.1827    0.1607    0.5561
Pt    0.1840    0.1640    0.5962
Pt    0.1799    0.2030    0.5140
Pt    0.1800    0.2033    0.5577
Pt    0.1842    0.2011    0.5979
Pt    0.0571    0.1426    0.5776
Pt    0.0558    0.1414    0.5337
Pt    0.0568    0.0997    0.5824
Pt    0.0783    0.9981    0.4969
Pt    0.2037    0.0399    0.5379
Pt    0.2109    0.0184    0.5595
Pt    0.2252    0.0401    0.6005
Pt    0.2271    0.0816    0.5588
Pt    0.2271    0.0785    0.5973
Pt    0.2254    0.1189    0.5548
Pt    0.2254    0.1226    0.5990
Pt    0.2276    0.1635    0.5152
Pt    0.2273    0.1598    0.5557
Pt    0.2263    0.1605    0.5991
Pt    0.2237    0.2043    0.5155
Pt    0.2245    0.2028    0.5565
Pt    0.2238    0.2023    0.6002
Pt    0.1611    0.2466    0.4969
Pt    0.1003    0.9983    0.5567
Pt    0.2259    0.1412    0.6214
Pt    0.0151    0.0170    0.5365
Pt    0.0182    0.0158    0.5787
Pt    0.0148    0.0570    0.5388
Pt    0.0168    0.0603    0.5791
Pt    0.0115    0.0997    0.5354
Pt    0.0131    0.1000    0.5793
Pt    0.0122    0.1482    0.5790
Pt    0.0136    0.1814    0.5789
Pt    0.0105    0.2252    0.5350
Pt    0.0587    0.0178    0.5375
Pt    0.0578    0.0165    0.5813
Pt    0.0578    0.0570    0.5409
Pt    0.0565    0.0585    0.5783
Pt    0.0572    0.0993    0.5356
Pt    0.9971    0.0398    0.5783
Pt    0.2032    0.2451    0.5363
Pt    0.2454    0.1395    0.5988
Pt    0.1189    0.1613    0.4978
Pt    0.0958    0.2271    0.6201
Pt    0.1617    0.2442    0.5778
Pt    0.0137    0.1005    0.4970
Pt    0.2438    0.2242    0.5560
Pt    0.2031    0.2463    0.6201
Pt    0.2448    0.2032    0.6207
Pt    0.1813    0.1414    0.6152
Pt    0.1853    0.2451    0.5152
Pt    0.2450    0.2030    0.5769
Pt    0.0806    0.1645    0.6204
Pt    0.1009    0.0536    0.6198
Pt    0.1414    0.0136    0.6166
Pt    0.2020    0.1597    0.6182
Pt    0.0805    0.2036    0.6210
Pt    0.0610    0.0579    0.6206
Pt    0.2262    0.2248    0.6205
Pt    0.1207    0.1634    0.6181
Pt    0.1614    0.2052    0.6189
Pt    0.2038    0.0774    0.6169
Pt    0.2028    0.2051    0.6206
Pt    0.1211    0.0346    0.6204
Pt    0.0985    0.1004    0.6196
Pt    0.0354    0.2065    0.6189
Pt    0.1819    0.1838    0.6201
Pt    0.1823    0.2281    0.6213
Pt    0.0378    0.0838    0.6188
Pt    0.1185    0.0809    0.6206
Pt    0.2116    0.0078    0.5356
Pt    0.0153    0.2273    0.6179
Pt    0.1823    0.0185    0.6181
Pt    0.1838    0.0574    0.6206
Pt    0.1427    0.1015    0.6199
Pt    0.0570    0.1827    0.6198
Pt    0.1397    0.1410    0.6196
Pt    0.0172    0.1405    0.6194
Pt    0.1610    0.1221    0.6198
Pt    0.0137    0.1017    0.6161
Pt    0.2437    0.2017    0.5382
Pt    0.0378    0.1224    0.6205
Pt    0.1177    0.2052    0.6214
Pt    0.2079    0.0401    0.6200
Pt    0.2240    0.0166    0.6215
Pt    0.2422    0.0059    0.5272
Pt    0.1835    0.0994    0.6185
Pt    0.2239    0.1776    0.6200
Pt    0.0798    0.0794    0.6202
Pt    0.1825    0.2458    0.5579
Pt    0.2274    0.0991    0.6183
Pt    0.2421    0.2448    0.5385
Pt    0.0126    0.1863    0.6193
Pt    0.2270    0.2442    0.6010
Pt    0.1625    0.1653    0.6201
Pt    0.2454    0.2266    0.5186
Pt    0.1628    0.0368    0.6190
Pt    0.2268    0.0592    0.6197
Pt    0.1392    0.1861    0.6200
Pt    0.2238    0.2425    0.5601
Pt    0.0574    0.1437    0.6195
Pt    0.0588    0.2269    0.6190
Pt    0.0180    0.0594    0.6188
Pt    0.1414    0.0573    0.6178
Pt    0.1018    0.1833    0.6211
Pt    0.0192    0.0156    0.6212
Pt    0.0772    0.1197    0.6199
Pt    0.1036    0.0153    0.4975
Pt    0.0580    0.0571    0.4972
Pt    0.0567    0.0185    0.4971
Pt    0.0181    0.9970    0.5585
Pt    0.1002    0.1442    0.7447
Pt    0.2254    0.2246    0.7058
Pt    0.2251    0.2229    0.6654
Pt    0.2242    0.1217    0.7230
Pt    0.9982    0.1866    0.6816
Pt    0.2255    0.1825    0.7048
Pt    0.2253    0.1855    0.6662
Pt    0.2241    0.1227    0.6823
Pt    0.2038    0.9984    0.7036
Pt    0.2236    0.1436    0.7049
Pt    0.2207    0.1433    0.6625
Pt    0.2258    0.1196    0.6434
Pt    0.0388    0.2086    0.7442
Pt    0.2274    0.0999    0.7020
Pt    0.2261    0.0972    0.6593
Pt    0.2268    0.0771    0.7244
Pt    0.0171    0.1022    0.7033
Pt    0.1036    0.9972    0.6850
Pt    0.2237    0.0572    0.7022
Pt    0.2276    0.0571    0.6604
Pt    0.2256    0.0787    0.6802
Pt    0.9967    0.2042    0.7045
Pt    0.2245    0.0179    0.7017
Pt    0.0999    0.2053    0.7247
Pt    0.1032    0.9972    0.7230
Pt    0.2220    0.0144    0.6588
Pt    0.0994    0.1431    0.7048
Pt    0.0997    0.1433    0.6634
Pt    0.2272    0.0783    0.6380
Pt    0.9969    0.2064    0.6598
Pt    0.2277    0.0373    0.7227
Pt    0.0416    0.0374    0.6626
Pt    0.0407    0.0375    0.7023
Pt    0.9989    0.1651    0.7019
Pt    0.2224    0.0392    0.6816
Pt    0.0351    0.0799    0.6628
Pt    0.0368    0.0795    0.7046
Pt    0.2244    0.9985    0.6825
Pt    0.2233    0.0369    0.6428
Pt    0.0378    0.1208    0.6600
Pt    0.0378    0.1209    0.7032
Pt    0.2257    0.9976    0.7231
Pt    0.2238    0.1630    0.6437
Pt    0.0353    0.1637    0.6603
Pt    0.0383    0.1609    0.7024
Pt    0.9971    0.9984    0.7453
Pt    0.0992    0.1640    0.7245
Pt    0.0385    0.2069    0.6626
Pt    0.0359    0.2098    0.7007
Pt    0.0810    0.9970    0.7039
Pt    0.0984    0.1225    0.6426
Pt    0.1017    0.1009    0.7023
Pt    0.1014    0.0996    0.6626
Pt    0.2243    0.1637    0.6831
Pt    0.9968    0.0152    0.6843
Pt    0.1013    0.0569    0.7024
Pt    0.1002    0.0570    0.6622
Pt    0.0833    0.9971    0.7437
Pt    0.2252    0.1627    0.7248
Pt    0.0811    0.0377    0.6623
Pt    0.0805    0.0351    0.7057
Pt    0.9983    0.0805    0.7452
Pt    0.2222    0.2022    0.6409
Pt    0.0806    0.0788    0.6636
Pt    0.0801    0.0792    0.7027
Pt    0.9965    0.1445    0.7250
Pt    0.2265    0.2044    0.6860
Pt    0.0803    0.1221    0.6650
Pt    0.0800    0.1196    0.7041
Pt    0.9966    0.1609    0.6584
Pt    0.1820    0.2059    0.7275
Pt    0.0762    0.1640    0.6631
Pt    0.0795    0.1635    0.7018
Pt    0.1399    0.2461    0.7274
Pt    0.1836    0.2056    0.6834
Pt    0.0778    0.2109    0.6601
Pt    0.0797    0.2059    0.7049
Pt    0.9973    0.2244    0.6820
Pt    0.0167    0.0602    0.7451
Pt    0.1025    0.0172    0.7045
Pt    0.0999    0.0157    0.6608
Pt    0.1825    0.2049    0.6421
Pt    0.0771    0.1635    0.7459
Pt    0.0573    0.2292    0.7008
Pt    0.0559    0.2303    0.6602
Pt    0.1836    0.1635    0.7245
Pt    0.1817    0.1650    0.6864
Pt    0.1218    0.0365    0.6589
Pt    0.1218    0.0395    0.7036
Pt    0.0978    0.1835    0.7437
Pt    0.1822    0.1623    0.6448
Pt    0.1203    0.0771    0.6619
Pt    0.1224    0.0779    0.7037
Pt    0.2233    0.2457    0.6848
Pt    0.1831    0.1219    0.7259
Pt    0.1215    0.1236    0.6604
Pt    0.1235    0.1226    0.7035
Pt    0.1863    0.0179    0.7437
Pt    0.1838    0.1220    0.6803
Pt    0.1210    0.1632    0.6633
Pt    0.1202    0.1648    0.7034
Pt    0.0366    0.0396    0.6227
Pt    0.1834    0.1223    0.6374
Pt    0.1180    0.2065    0.6618
Pt    0.1183    0.2033    0.7042
Pt    0.2093    0.0387    0.7460
Pt    0.9984    0.0561    0.6799
Pt    0.0576    0.1831    0.7025
Pt    0.0590    0.1886    0.6611
Pt    0.1868    0.0777    0.7243
Pt    0.2450    0.0997    0.6812
Pt    0.9980    0.0190    0.7244
Pt    0.0595    0.1411    0.7025
Pt    0.0593    0.1436    0.6597
Pt    0.1851    0.0797    0.6841
Pt    0.1624    0.0346    0.6610
Pt    0.1615    0.0369    0.7026
Pt    0.2446    0.1425    0.6821
Pt    0.1834    0.0785    0.6387
Pt    0.1628    0.0785    0.6587
Pt    0.1640    0.0809    0.7036
Pt    0.1421    0.2266    0.6229
Pt    0.1854    0.0404    0.7257
Pt    0.1609    0.1213    0.6589
Pt    0.1626    0.1211    0.7023
Pt    0.0589    0.2271    0.7453
Pt    0.1826    0.0391    0.6828
Pt    0.1596    0.1644    0.6618
Pt    0.1616    0.1656    0.7035
Pt    0.0793    0.0350    0.6216
Pt    0.1874    0.0343    0.6393
Pt    0.1619    0.2065    0.6630
Pt    0.1661    0.2037    0.7048
Pt    0.1415    0.1424    0.7465
Pt    0.2261    0.2036    0.7262
Pt    0.2226    0.2425    0.6436
Pt    0.0595    0.1012    0.7019
Pt    0.0564    0.0994    0.6625
Pt    0.0184    0.0110    0.6640
Pt    0.9990    0.2058    0.7463
Pt    0.0596    0.0573    0.7035
Pt    0.0986    0.1633    0.6831
Pt    0.2031    0.0377    0.6607
Pt    0.2029    0.0362    0.7031
Pt    0.2249    0.2449    0.7247
Pt    0.0175    0.0160    0.7050
Pt    0.2041    0.0804    0.6607
Pt    0.2058    0.0806    0.7013
Pt    0.1452    0.0596    0.7454
Pt    0.1642    0.0366    0.7445
Pt    0.2045    0.1212    0.6614
Pt    0.2041    0.1221    0.7027
Pt    0.0556    0.0169    0.6229
Pt    0.1417    0.2059    0.7244
Pt    0.2045    0.1645    0.6641
Pt    0.2051    0.1643    0.7061
Pt    0.2460    0.1203    0.7455
Pt    0.1396    0.2058    0.6837
Pt    0.2026    0.2056    0.6630
Pt    0.2038    0.2067    0.7064
Pt    0.1184    0.1189    0.6217
Pt    0.0604    0.0583    0.6658
Pt    0.1401    0.2055    0.6407
Pt    0.2447    0.1190    0.6631
Pt    0.0605    0.0164    0.7056
Pt    0.0990    0.2044    0.6832
Pt    0.0991    0.1634    0.6417
Pt    0.9982    0.1210    0.7441
Pt    0.0988    0.1214    0.6838
Pt    0.1786    0.2263    0.7041
Pt    0.1814    0.2266    0.6637
Pt    0.1420    0.1622    0.7238
Pt    0.0171    0.2289    0.7464
Pt    0.1856    0.1852    0.7061
Pt    0.1829    0.1843    0.6640
Pt    0.1418    0.1617    0.6825
Pt    0.9971    0.0608    0.6410
Pt    0.1823    0.1413    0.7055
Pt    0.1848    0.1433    0.6614
Pt    0.1421    0.1643    0.6387
Pt    0.2436    0.9985    0.6599
Pt    0.1826    0.1020    0.7042
Pt    0.1853    0.1000    0.6590
Pt    0.1414    0.1190    0.7234
Pt    0.2445    0.0772    0.7014
Pt    0.1839    0.0561    0.7051
Pt    0.1870    0.0584    0.6609
Pt    0.1439    0.1205    0.6809
Pt    0.1393    0.1209    0.6396
Pt    0.1456    0.0173    0.7444
Pt    0.0795    0.0777    0.7450
Pt    0.9966    0.1004    0.7235
Pt    0.1851    0.0168    0.7012
Pt    0.1837    0.0150    0.6593
Pt    0.1428    0.0806    0.7215
Pt    0.1833    0.9971    0.7251
Pt    0.1412    0.2293    0.7020
Pt    0.1392    0.2250    0.6635
Pt    0.1436    0.0816    0.6802
Pt    0.1018    0.0575    0.7441
Pt    0.1430    0.1857    0.7050
Pt    0.1409    0.1857    0.6631
Pt    0.1410    0.0787    0.6392
Pt    0.9987    0.2238    0.7261
Pt    0.1437    0.1420    0.7044
Pt    0.1424    0.1415    0.6598
Pt    0.1418    0.0389    0.7238
Pt    0.0999    0.2076    0.6424
Pt    0.0168    0.1425    0.7457
Pt    0.1429    0.1006    0.6996
Pt    0.0359    0.0177    0.6443
Pt    0.0402    0.0148    0.6835
Pt    0.0376    0.0162    0.7239
Pt    0.0402    0.0638    0.6399
Pt    0.0381    0.0565    0.6827
Pt    0.0387    0.0575    0.7247
Pt    0.0379    0.1020    0.6405
Pt    0.0365    0.1013    0.6809
Pt    0.0387    0.1015    0.7230
Pt    0.0367    0.1430    0.6395
Pt    0.0400    0.1410    0.6807
Pt    0.0380    0.1405    0.7231
Pt    0.0380    0.1856    0.6378
Pt    0.0395    0.1858    0.6794
Pt    0.0373    0.1853    0.7245
Pt    0.0355    0.2277    0.6383
Pt    0.0359    0.2298    0.6826
Pt    0.0372    0.2303    0.7206
Pt    0.0782    0.0167    0.6427
Pt    0.0812    0.0174    0.6819
Pt    0.0811    0.0178    0.7264
Pt    0.0789    0.0558    0.6411
Pt    0.0815    0.0574    0.6842
Pt    0.0805    0.0591    0.7228
Pt    0.0815    0.1008    0.6435
Pt    0.0802    0.0998    0.6811
Pt    0.0812    0.0986    0.7239
Pt    0.0785    0.1448    0.6402
Pt    0.0787    0.1428    0.6831
Pt    0.0794    0.1440    0.7234
Pt    0.0780    0.1829    0.6394
Pt    0.0793    0.1851    0.6811
Pt    0.0767    0.1856    0.7229
Pt    0.0766    0.2284    0.6412
Pt    0.0788    0.2281    0.6825
Pt    0.0753    0.2282    0.7220
Pt    0.1206    0.0135    0.6422
Pt    0.1219    0.0178    0.6793
Pt    0.1216    0.0199    0.7260
Pt    0.1196    0.0573    0.6391
Pt    0.1225    0.0588    0.6816
Pt    0.1219    0.0592    0.7229
Pt    0.1197    0.0989    0.6413
Pt    0.1225    0.1010    0.6819
Pt    0.1232    0.1006    0.7222
Pt    0.1217    0.1438    0.6401
Pt    0.1206    0.1416    0.6827
Pt    0.1227    0.1431    0.7236
Pt    0.1222    0.1854    0.6410
Pt    0.1190    0.1843    0.6809
Pt    0.1192    0.1829    0.7253
Pt    0.1200    0.2268    0.6406
Pt    0.1179    0.2260    0.6836
Pt    0.1196    0.2246    0.7252
Pt    0.1632    0.0166    0.6377
Pt    0.1613    0.0169    0.6829
Pt    0.1635    0.0177    0.7225
Pt    0.1649    0.0566    0.6405
Pt    0.1642    0.0576    0.6789
Pt    0.1628    0.0606    0.7244
Pt    0.1640    0.1004    0.6393
Pt    0.1646    0.0995    0.6819
Pt    0.1618    0.1001    0.7228
Pt    0.1629    0.1422    0.6393
Pt    0.1646    0.1412    0.6803
Pt    0.1615    0.1418    0.7255
Pt    0.1631    0.1859    0.6409
Pt    0.1600    0.1848    0.6807
Pt    0.1639    0.1838    0.7245
Pt    0.1618    0.2277    0.6446
Pt    0.1612    0.2264    0.6844
Pt    0.1600    0.2267    0.7263
Pt    0.2013    0.0110    0.6364
Pt    0.2030    0.0179    0.6792
Pt    0.2044    0.0191    0.7230
Pt    0.2040    0.0581    0.6417
Pt    0.2045    0.0602    0.6838
Pt    0.2061    0.0591    0.7239
Pt    0.2059    0.0990    0.6403
Pt    0.2037    0.1031    0.6835
Pt    0.2054    0.0987    0.7243
Pt    0.2048    0.1424    0.6405
Pt    0.2048    0.1421    0.6845
Pt    0.2048    0.1432    0.7253
Pt    0.2036    0.1839    0.6390
Pt    0.2033    0.1847    0.6849
Pt    0.2050    0.1853    0.7259
Pt    0.2031    0.2237    0.6422
Pt    0.2007    0.2260    0.6852
Pt    0.2029    0.2275    0.7231
Pt    0.1399    0.1004    0.6584
Pt    0.1410    0.0363    0.6812
Pt    0.0587    0.0587    0.7448
Pt    0.1448    0.0608    0.6992
Pt    0.1416    0.0574    0.6585
Pt    0.1426    0.0354    0.6398
Pt    0.1202    0.2043    0.7458
Pt    0.1399    0.0179    0.7051
Pt    0.1425    0.0163    0.6596
Pt    0.2045    0.1206    0.7446
Pt    0.0583    0.1856    0.7450
Pt    0.0992    0.2257    0.7047
Pt    0.0984    0.2280    0.6619
Pt    0.0166    0.0612    0.6601
Pt    0.1220    0.1231    0.7430
Pt    0.0984    0.1832    0.7041
Pt    0.0983    0.1843    0.6598
Pt    0.0172    0.0551    0.7027
Pt    0.0601    0.0143    0.6631
Pt    0.2455    0.1808    0.7255
Pt    0.9965    0.1864    0.7255
Pt    0.0169    0.0384    0.6415
Pt    0.0182    0.0347    0.6836
Pt    0.0198    0.0391    0.7237
Pt    0.0176    0.0822    0.6403
Pt    0.0168    0.0784    0.6865
Pt    0.0172    0.0799    0.7235
Pt    0.0164    0.1203    0.6400
Pt    0.0170    0.1205    0.6842
Pt    0.0163    0.1217    0.7215
Pt    0.0162    0.1645    0.6380
Pt    0.0182    0.1651    0.6810
Pt    0.0174    0.1654    0.7250
Pt    0.0190    0.2036    0.6421
Pt    0.0181    0.2055    0.6818
Pt    0.0206    0.2076    0.7251
Pt    0.0141    0.2298    0.7033
Pt    0.0166    0.2277    0.6608
Pt    0.1012    0.1225    0.7227
Pt    0.1650    0.9973    0.7450
Pt    0.0191    0.1848    0.7038
Pt    0.0142    0.1814    0.6583
Pt    0.0595    0.0384    0.6447
Pt    0.0613    0.0350    0.6828
Pt    0.0595    0.0376    0.7245
Pt    0.0607    0.0817    0.6444
Pt    0.0563    0.0809    0.6839
Pt    0.0603    0.0794    0.7214
Pt    0.0602    0.1186    0.6427
Pt    0.0605    0.1202    0.6821
Pt    0.0586    0.1213    0.7238
Pt    0.0561    0.1635    0.6406
Pt    0.0560    0.1632    0.6817
Pt    0.0580    0.1662    0.7240
Pt    0.0563    0.2049    0.6387
Pt    0.0594    0.2078    0.6818
Pt    0.0558    0.2074    0.7227
Pt    0.0144    0.1001    0.6612
Pt    0.0589    0.1017    0.7450
Pt    0.0173    0.1442    0.7032
Pt    0.0190    0.1408    0.6620
Pt    0.2452    0.2239    0.6418
Pt    0.2455    0.0208    0.6809
Pt    0.0995    0.0369    0.6419
Pt    0.1026    0.0377    0.6818
Pt    0.0999    0.0386    0.7244
Pt    0.0982    0.0773    0.6404
Pt    0.1003    0.0776    0.6843
Pt    0.1028    0.0804    0.7254
Pt    0.2449    0.1401    0.6436
Pt    0.1649    0.9974    0.7028
Pt    0.2073    0.1191    0.6222
Pt    0.1009    0.1419    0.6217
Pt    0.1010    0.0152    0.6229
Pt    0.2270    0.0988    0.7457
Pt    0.2459    0.2434    0.6667
Pt    0.2460    0.1602    0.7070
Pt    0.2441    0.1640    0.6636
Pt    0.1189    0.2467    0.6225
Pt    0.0161    0.0175    0.7465
Pt    0.2062    0.0788    0.7442
Pt    0.2460    0.2041    0.6639
Pt    0.1220    0.1625    0.7436
Pt    0.9974    0.0789    0.7043
Pt    0.2440    0.1842    0.6429
Pt    0.1017    0.0205    0.7454
Pt    0.1235    0.0821    0.7452
Pt    0.1624    0.1639    0.7450
Pt    0.1249    0.0384    0.7462
Pt    0.0180    0.1011    0.7454
Pt    0.1217    0.9981    0.7439
Pt    0.1827    0.2452    0.6425
Pt    0.0576    0.0136    0.7450
Pt    0.9967    0.0799    0.6633
Pt    0.1805    0.2454    0.7271
Pt    0.2464    0.0985    0.7244
Pt    0.0771    0.2065    0.7427
Pt    0.1411    0.1839    0.7460
Pt    0.0384    0.1631    0.7448
Pt    0.0577    0.1421    0.7417
Pt    0.2039    0.2464    0.7067
Pt    0.2460    0.0379    0.6232
Pt    0.0590    0.0998    0.6225
Pt    0.1670    0.0799    0.7439
Pt    0.2461    0.1191    0.7063
Pt    0.2458    0.2040    0.7087
Pt    0.9996    0.1639    0.7456
Pt    0.0965    0.2271    0.7448
Pt    0.0382    0.0819    0.7441
Pt    0.1825    0.1020    0.7463
Pt    0.1629    0.1218    0.7463
Pt    0.1838    0.1421    0.7454
Pt    0.2284    0.0597    0.7465
Pt    0.2441    0.2447    0.7464
Pt    0.2284    0.0194    0.7463
Pt    0.2250    0.2283    0.8290
Pt    0.2265    0.2254    0.7935
Pt    0.2260    0.1825    0.8295
Pt    0.2272    0.1839    0.7889
Pt    0.2272    0.1433    0.8277
Pt    0.2240    0.1398    0.7871
Pt    0.2252    0.1031    0.8290
Pt    0.2257    0.0988    0.7875
Pt    0.2269    0.0603    0.8298
Pt    0.2262    0.0590    0.7899
Pt    0.2269    0.0190    0.8270
Pt    0.2270    0.0194    0.7882
Pt    0.1840    0.2287    0.8313
Pt    0.1850    0.2240    0.7904
Pt    0.0155    0.1423    0.8273
Pt    0.0168    0.1445    0.7871
Pt    0.0339    0.0398    0.7870
Pt    0.0362    0.0371    0.8283
Pt    0.0349    0.0799    0.7919
Pt    0.0384    0.0808    0.8308
Pt    0.0358    0.1225    0.7899
Pt    0.0354    0.1249    0.8289
Pt    0.0359    0.1660    0.7876
Pt    0.0340    0.1644    0.8302
Pt    0.0384    0.2078    0.7877
Pt    0.0374    0.2081    0.8276
Pt    0.0161    0.1004    0.8307
Pt    0.0152    0.1023    0.7893
Pt    0.0174    0.0593    0.8296
Pt    0.0164    0.0610    0.7895
Pt    0.0801    0.0360    0.7876
Pt    0.0772    0.0352    0.8271
Pt    0.0789    0.0793    0.7863
Pt    0.0783    0.0811    0.8301
Pt    0.0781    0.1221    0.7847
Pt    0.0789    0.1215    0.8303
Pt    0.0770    0.1661    0.7862
Pt    0.0769    0.1632    0.8316
Pt    0.0798    0.2075    0.7875
Pt    0.0779    0.2026    0.8294
Pt    0.0170    0.0150    0.8266
Pt    0.0151    0.0175    0.7882
Pt    0.2247    0.2049    0.8513
Pt    0.2268    0.2025    0.8096
Pt    0.1247    0.0390    0.7881
Pt    0.1219    0.0380    0.8280
Pt    0.1174    0.0814    0.7893
Pt    0.1215    0.0826    0.8297
Pt    0.1195    0.1232    0.7859
Pt    0.1197    0.1208    0.8321
Pt    0.1182    0.1658    0.7860
Pt    0.1196    0.1642    0.8287
Pt    0.1214    0.2058    0.7866
Pt    0.1197    0.2052    0.8276
Pt    0.2253    0.2053    0.7660
Pt    0.2259    0.1620    0.8497
Pt    0.2232    0.1611    0.8071
Pt    0.2245    0.1629    0.7701
Pt    0.1638    0.0415    0.7879
Pt    0.1628    0.0370    0.8302
Pt    0.1618    0.0799    0.7865
Pt    0.1632    0.0808    0.8289
Pt    0.1601    0.1249    0.7867
Pt    0.1601    0.1216    0.8296
Pt    0.1619    0.1658    0.7876
Pt    0.1611    0.1642    0.8284
Pt    0.1635    0.2068    0.7872
Pt    0.1621    0.2063    0.8302
Pt    0.2282    0.1222    0.8507
Pt    0.2248    0.1217    0.8088
Pt    0.2242    0.1215    0.7682
Pt    0.2249    0.0834    0.8476
Pt    0.2067    0.0380    0.7888
Pt    0.2065    0.0401    0.8312
Pt    0.2045    0.0778    0.7899
Pt    0.2041    0.0789    0.8291
Pt    0.2025    0.1225    0.7886
Pt    0.2058    0.1242    0.8308
Pt    0.2011    0.1642    0.7875
Pt    0.2052    0.1628    0.8302
Pt    0.2057    0.2042    0.7889
Pt    0.2035    0.2033    0.8308
Pt    0.2260    0.0796    0.8093
Pt    0.2253    0.0775    0.7683
Pt    0.1841    0.1832    0.8296
Pt    0.1830    0.1839    0.7859
Pt    0.1816    0.1439    0.8307
Pt    0.1826    0.1416    0.7863
Pt    0.1864    0.0994    0.8306
Pt    0.1834    0.1019    0.7886
Pt    0.1839    0.0604    0.8289
Pt    0.1849    0.0592    0.7883
Pt    0.1851    0.0187    0.8309
Pt    0.1833    0.0208    0.7890
Pt    0.1433    0.2264    0.8291
Pt    0.1417    0.2278    0.7859
Pt    0.1399    0.1849    0.8277
Pt    0.1412    0.1838    0.7880
Pt    0.1393    0.1419    0.8301
Pt    0.1393    0.1462    0.7851
Pt    0.1413    0.1008    0.8290
Pt    0.1427    0.1012    0.7866
Pt    0.1428    0.0603    0.8275
Pt    0.1418    0.0591    0.7882
Pt    0.1420    0.0158    0.8305
Pt    0.1440    0.0182    0.7872
Pt    0.1002    0.2249    0.8307
Pt    0.0997    0.2271    0.7888
Pt    0.0987    0.1813    0.8267
Pt    0.0995    0.1845    0.7883
Pt    0.1009    0.1432    0.8309
Pt    0.1005    0.1424    0.7874
Pt    0.1006    0.0989    0.8318
Pt    0.0967    0.1024    0.7871
Pt    0.1000    0.0579    0.8270
Pt    0.1006    0.0576    0.7876
Pt    0.0358    0.0199    0.7698
Pt    0.0393    0.0192    0.8066
Pt    0.0414    0.0171    0.8512
Pt    0.0376    0.0583    0.7658
Pt    0.0354    0.0557    0.8097
Pt    0.0364    0.0584    0.8504
Pt    0.0386    0.1014    0.7665
Pt    0.0370    0.1019    0.8128
Pt    0.0376    0.1023    0.8536
Pt    0.0390    0.1437    0.7667
Pt    0.0361    0.1464    0.8083
Pt    0.0372    0.1443    0.8496
Pt    0.0393    0.1847    0.7671
Pt    0.0354    0.1874    0.8094
Pt    0.0378    0.1870    0.8509
Pt    0.0375    0.2276    0.7678
Pt    0.0355    0.2298    0.8081
Pt    0.0358    0.2252    0.8515
Pt    0.0791    0.0134    0.7672
Pt    0.0806    0.0146    0.8057
Pt    0.0786    0.0171    0.8507
Pt    0.0779    0.0567    0.7688
Pt    0.0779    0.0589    0.8063
Pt    0.0817    0.0571    0.8473
Pt    0.0775    0.1012    0.7658
Pt    0.0794    0.1006    0.8081
Pt    0.0796    0.1008    0.8505
Pt    0.0788    0.1435    0.7668
Pt    0.0789    0.1448    0.8091
Pt    0.0796    0.1414    0.8510
Pt    0.0793    0.1870    0.7668
Pt    0.0773    0.1830    0.8079
Pt    0.0760    0.1845    0.8512
Pt    0.0786    0.2272    0.7681
Pt    0.0779    0.2274    0.8086
Pt    0.0779    0.2263    0.8512
Pt    0.1236    0.0181    0.7656
Pt    0.1212    0.0177    0.8068
Pt    0.1210    0.0192    0.8532
Pt    0.1224    0.0577    0.7665
Pt    0.1197    0.0611    0.8086
Pt    0.1219    0.0616    0.8484
Pt    0.1204    0.1025    0.7695
Pt    0.1187    0.1019    0.8074
Pt    0.1200    0.0993    0.8512
Pt    0.1191    0.1438    0.7643
Pt    0.1200    0.1432    0.8061
Pt    0.1202    0.1441    0.8523
Pt    0.1160    0.1857    0.7653
Pt    0.1206    0.1831    0.8075
Pt    0.1189    0.1858    0.8492
Pt    0.1211    0.2295    0.7646
Pt    0.1210    0.2266    0.8077
Pt    0.1225    0.2264    0.8492
Pt    0.1647    0.0182    0.7684
Pt    0.1639    0.0172    0.8121
Pt    0.1649    0.0169    0.8500
Pt    0.1661    0.0605    0.7657
Pt    0.1631    0.0589    0.8077
Pt    0.1622    0.0598    0.8495
Pt    0.1654    0.0999    0.7684
Pt    0.1624    0.1005    0.8080
Pt    0.1633    0.1027    0.8493
Pt    0.1599    0.1421    0.7664
Pt    0.1634    0.1423    0.8068
Pt    0.1597    0.1446    0.8507
Pt    0.1616    0.1851    0.7665
Pt    0.1620    0.1865    0.8070
Pt    0.1629    0.1854    0.8473
Pt    0.1619    0.2260    0.7673
Pt    0.1613    0.2283    0.8067
Pt    0.1646    0.2269    0.8502
Pt    0.2074    0.0190    0.7680
Pt    0.2070    0.0172    0.8086
Pt    0.2054    0.0182    0.8505
Pt    0.2044    0.0585    0.7669
Pt    0.2044    0.0582    0.8102
Pt    0.2038    0.0615    0.8497
Pt    0.2074    0.1001    0.7668
Pt    0.2060    0.0997    0.8092
Pt    0.2051    0.1061    0.8512
Pt    0.2038    0.1444    0.7653
Pt    0.2008    0.1436    0.8085
Pt    0.2050    0.1443    0.8499
Pt    0.2053    0.1859    0.7672
Pt    0.2049    0.1847    0.8097
Pt    0.2071    0.1826    0.8526
Pt    0.2045    0.2252    0.7683
Pt    0.2048    0.2244    0.8102
Pt    0.2049    0.2276    0.8510
Pt    0.0987    0.0173    0.8295
Pt    0.1016    0.0185    0.7848
Pt    0.0604    0.2268    0.8286
Pt    0.0588    0.2290    0.7871
Pt    0.0564    0.1876    0.8277
Pt    0.0579    0.1873    0.7886
Pt    0.0559    0.1426    0.8250
Pt    0.0603    0.1451    0.7882
Pt    0.0583    0.1011    0.8299
Pt    0.0586    0.0997    0.7868
Pt    0.0592    0.0567    0.8291
Pt    0.0554    0.0607    0.7887
Pt    0.0581    0.0145    0.8278
Pt    0.0593    0.0147    0.7864
Pt    0.0165    0.2281    0.8305
Pt    0.0165    0.2271    0.7874
Pt    0.0164    0.1882    0.8296
Pt    0.0149    0.1874    0.7873
Pt    0.2274    0.0384    0.8490
Pt    0.2276    0.0400    0.8100
Pt    0.2275    0.0385    0.7670
Pt    0.0140    0.0405    0.7657
Pt    0.0122    0.0385    0.8109
Pt    0.0192    0.0374    0.8514
Pt    0.0193    0.0817    0.7693
Pt    0.0159    0.0815    0.8108
Pt    0.0186    0.0816    0.8517
Pt    0.0128    0.1200    0.7694
Pt    0.0140    0.1224    0.8061
Pt    0.0157    0.1230    0.8492
Pt    0.0192    0.1625    0.7659
Pt    0.0169    0.1643    0.8069
Pt    0.0132    0.1648    0.8496
Pt    0.0185    0.2069    0.7651
Pt    0.0133    0.2078    0.8078
Pt    0.0142    0.2082    0.8501
Pt    0.1855    0.2065    0.8524
Pt    0.1846    0.2043    0.8079
Pt    0.1838    0.2044    0.7703
Pt    0.1836    0.1666    0.8519
Pt    0.1832    0.1654    0.8085
Pt    0.1803    0.1614    0.7670
Pt    0.0584    0.0375    0.7681
Pt    0.0590    0.0395    0.8045
Pt    0.0596    0.0385    0.8509
Pt    0.0590    0.0795    0.7657
Pt    0.0597    0.0816    0.8071
Pt    0.0586    0.0806    0.8501
Pt    0.0564    0.1230    0.7675
Pt    0.0590    0.1194    0.8067
Pt    0.0557    0.1222    0.8490
Pt    0.0583    0.1646    0.7662
Pt    0.0561    0.1664    0.8093
Pt    0.0560    0.1642    0.8495
Pt    0.0577    0.2065    0.7650
Pt    0.0575    0.2098    0.8084
Pt    0.0562    0.2069    0.8490
Pt    0.1852    0.1259    0.8507
Pt    0.1836    0.1190    0.8126
Pt    0.1857    0.1216    0.7664
Pt    0.1846    0.0832    0.8511
Pt    0.1819    0.0804    0.8091
Pt    0.1870    0.0804    0.7678
Pt    0.1000    0.0395    0.7674
Pt    0.1007    0.0368    0.8076
Pt    0.1008    0.0369    0.8488
Pt    0.1010    0.0773    0.7671
Pt    0.0978    0.0792    0.8087
Pt    0.0980    0.0797    0.8516
Pt    0.1004    0.1226    0.7665
Pt    0.0969    0.1237    0.8115
Pt    0.0985    0.1215    0.8529
Pt    0.0993    0.1662    0.7642
Pt    0.0997    0.1624    0.8079
Pt    0.0986    0.1641    0.8507
Pt    0.0988    0.2085    0.7658
Pt    0.0989    0.2040    0.8105
Pt    0.0980    0.2065    0.8505
Pt    0.1853    0.0406    0.8506
Pt    0.1852    0.0396    0.8088
Pt    0.1853    0.0374    0.7663
Pt    0.1393    0.2029    0.8497
Pt    0.1421    0.2072    0.8073
Pt    0.1400    0.2058    0.7687
Pt    0.1442    0.0382    0.7672
Pt    0.1435    0.0380    0.8076
Pt    0.1411    0.0382    0.8493
Pt    0.1366    0.0802    0.7695
Pt    0.1413    0.0791    0.8072
Pt    0.1421    0.0795    0.8482
Pt    0.1396    0.1231    0.7668
Pt    0.1412    0.1226    0.8074
Pt    0.1418    0.1215    0.8510
Pt    0.1423    0.1657    0.7650
Pt    0.1432    0.1626    0.8080
Pt    0.1410    0.1667    0.8508
Pt    0.1422    0.2252    0.7473
Pt    0.1407    0.9971    0.8081
Pt    0.1635    0.9981    0.7880
Pt    0.9982    0.0182    0.8501
Pt    0.2286    0.9982    0.8081
Pt    0.1214    0.9971    0.7855
Pt    0.2251    0.1833    0.7478
Pt    0.2066    0.9973    0.8697
Pt    0.2459    0.9976    0.7849
Pt    0.2443    0.2052    0.8315
Pt    0.9978    0.2286    0.7670
Pt    0.1864    0.9974    0.8510
Pt    0.1841    0.9986    0.8099
Pt    0.1208    0.9990    0.8301
Pt    0.0380    0.1226    0.7480
Pt    0.2007    0.2456    0.7492
Pt    0.2257    0.1420    0.7477
Pt    0.1006    0.9986    0.8517
Pt    0.0193    0.1853    0.7475
Pt    0.0170    0.9993    0.7663
Pt    0.1214    0.2464    0.8303
Pt    0.1649    0.0402    0.8694
Pt    0.2462    0.0791    0.8282
Pt    0.1820    0.2465    0.7691
Pt    0.1433    0.1002    0.7483
Pt    0.1857    0.9992    0.7652
Pt    0.0797    0.0373    0.7467
Pt    0.9965    0.0619    0.8533
Pt    0.1828    0.2249    0.7474
Pt    0.9969    0.0185    0.7674
Pt    0.2249    0.0614    0.8704
Pt    0.0166    0.2454    0.8523
Pt    0.1828    0.1452    0.8713
Pt    0.1863    0.0218    0.8711
Pt    0.0580    0.1456    0.8687
Pt    0.2261    0.9975    0.8476
Pt    0.2274    0.9975    0.7659
Pt    0.1026    0.9971    0.8075
Pt    0.1415    0.0006    0.8530
Pt    0.0389    0.2464    0.8711
Pt    0.2464    0.2040    0.7477
Pt    0.2025    0.2035    0.7468
Pt    0.2073    0.2459    0.8319
Pt    0.1032    0.1008    0.7472
Pt    0.1449    0.9975    0.7645
Pt    0.2457    0.1849    0.8502
Pt    0.0578    0.2447    0.8500
Pt    0.0364    0.9970    0.7476
Pt    0.0805    0.1231    0.7473
Pt    0.1216    0.0802    0.8699
Pt    0.2256    0.1449    0.8712
Pt    0.0773    0.1244    0.8704
Pt    0.1029    0.2457    0.8519
Pt    0.0392    0.0375    0.7471
Pt    0.0383    0.0786    0.8702
Pt    0.2281    0.2246    0.8714
Pt    0.2050    0.9984    0.7853
Pt    0.0171    0.0609    0.8707
Pt    0.2459    0.1008    0.8086
Pt    0.1400    0.1859    0.8706
Pt    0.0365    0.1246    0.8707
Pt    0.1620    0.1670    0.8691
Pt    0.1416    0.0585    0.8712
Pt    0.2059    0.2454    0.7899
Pt    0.1423    0.1010    0.8711
Pt    0.2058    0.0818    0.8689
Pt    0.1670    0.9972    0.8698
Pt    0.1837    0.1835    0.7476
Pt    0.1650    0.1244    0.8699
Pt    0.2277    0.0209    0.8690
Pt    0.1845    0.2457    0.8106
Pt    0.0352    0.1679    0.8697
Pt    0.1647    0.2041    0.8695
Pt    0.1659    0.0835    0.8697
Pt    0.2457    0.0598    0.8521
Pt    0.0190    0.0179    0.8695
Pt    0.0378    0.2466    0.8310
Pt    0.2050    0.1649    0.7468
Pt    0.1852    0.0597    0.7471
Pt    0.2239    0.2449    0.7702
Pt    0.0163    0.1447    0.8691
Pt    0.2452    0.2459    0.7880
Pt    0.2233    0.2265    0.7469
Pt    0.2456    0.2244    0.7679
Pt    0.1859    0.1040    0.8697
Pt    0.0983    0.1837    0.8709
Pt    0.2264    0.1013    0.8687
Pt    0.2457    0.9974    0.8702
Pt    0.2457    0.0829    0.8706
Pt    0.1438    0.2283    0.8705
Pt    0.1427    0.1425    0.8710
Pt    0.0997    0.0184    0.8708
Pt    0.1216    0.9992    0.8705
Pt    0.0999    0.2275    0.8696
Pt    0.1003    0.1434    0.8714
Pt    0.2460    0.1219    0.8715
Pt    0.2058    0.0410    0.8714
Pt    0.1613    0.2057    0.7468
Pt    0.2282    0.2273    0.9548
Pt    0.2261    0.2266    0.9145
Pt    0.1435    0.0001    0.8890
Pt    0.2312    0.1856    0.9547
Pt    0.2248    0.1869    0.9126
Pt    0.9981    0.1018    0.8926
Pt    0.2281    0.1447    0.9562
Pt    0.2228    0.1462    0.9153
Pt    0.2285    0.0399    0.9752
Pt    0.2271    0.0998    0.9575
Pt    0.2227    0.1025    0.9111
Pt    0.1853    0.0407    0.9756
Pt    0.2275    0.0603    0.9527
Pt    0.2276    0.0585    0.9131
Pt    0.1833    0.0370    0.9340
Pt    0.2275    0.0175    0.9564
Pt    0.2255    0.0168    0.9119
Pt    0.1863    0.0418    0.8925
Pt    0.1822    0.2262    0.9580
Pt    0.1870    0.2278    0.9120
Pt    0.9967    0.1854    0.8932
Pt    0.0605    0.1435    0.9568
Pt    0.0607    0.1430    0.9123
Pt    0.1853    0.0833    0.8904
Pt    0.1844    0.0813    0.9340
Pt    0.0373    0.0386    0.9127
Pt    0.0376    0.0418    0.9551
Pt    0.1832    0.0813    0.9740
Pt    0.0379    0.0825    0.9125
Pt    0.0375    0.0804    0.9532
Pt    0.1846    0.1253    0.8932
Pt    0.0392    0.1249    0.9127
Pt    0.0385    0.1249    0.9536
Pt    0.1843    0.1245    0.9328
Pt    0.0357    0.1672    0.9137
Pt    0.0385    0.1650    0.9562
Pt    0.1847    0.1214    0.9776
Pt    0.0361    0.2048    0.9129
Pt    0.0387    0.2083    0.9554
Pt    0.0582    0.0996    0.9562
Pt    0.0587    0.1007    0.9152
Pt    0.1465    0.2068    0.9747
Pt    0.0599    0.0604    0.9566
Pt    0.0587    0.0611    0.9143
Pt    0.1435    0.2069    0.9355
Pt    0.1411    0.2053    0.8924
Pt    0.0786    0.0390    0.9139
Pt    0.0801    0.0399    0.9532
Pt    0.1409    0.1643    0.9778
Pt    0.0814    0.0814    0.9147
Pt    0.0805    0.0825    0.9571
Pt    0.1409    0.1674    0.9340
Pt    0.0800    0.1211    0.9124
Pt    0.0768    0.1214    0.9563
Pt    0.1415    0.1633    0.8888
Pt    0.0802    0.1642    0.9151
Pt    0.0812    0.1648    0.9559
Pt    0.1415    0.1239    0.9763
Pt    0.0801    0.2060    0.9124
Pt    0.0807    0.2074    0.9535
Pt    0.0574    0.0179    0.9544
Pt    0.0582    0.0183    0.9117
Pt    0.1429    0.1228    0.9357
Pt    0.0166    0.2259    0.9557
Pt    0.0154    0.2281    0.9117
Pt    0.1428    0.1211    0.8912
Pt    0.1406    0.0822    0.9780
Pt    0.1240    0.0427    0.9128
Pt    0.1248    0.0386    0.9564
Pt    0.1431    0.0814    0.9345
Pt    0.1230    0.0814    0.9142
Pt    0.1230    0.0827    0.9565
Pt    0.1445    0.0812    0.8933
Pt    0.1217    0.1241    0.9134
Pt    0.1218    0.1216    0.9546
Pt    0.1011    0.0374    0.8954
Pt    0.1214    0.1641    0.9117
Pt    0.1211    0.1643    0.9576
Pt    0.2240    0.0829    0.8915
Pt    0.1236    0.2083    0.9134
Pt    0.1234    0.2076    0.9541
Pt    0.0177    0.1867    0.9588
Pt    0.0141    0.1847    0.9171
Pt    0.1444    0.0376    0.9762
Pt    0.0173    0.1427    0.9565
Pt    0.0173    0.1441    0.9130
Pt    0.1435    0.0418    0.9316
Pt    0.1479    0.0416    0.8924
Pt    0.1652    0.0370    0.9120
Pt    0.1635    0.0410    0.9548
Pt    0.1841    0.1646    0.8948
Pt    0.1638    0.0829    0.9117
Pt    0.1656    0.0766    0.9550
Pt    0.2258    0.0402    0.8931
Pt    0.1636    0.1242    0.9126
Pt    0.1636    0.1249    0.9562
Pt    0.2265    0.0810    0.9340
Pt    0.1620    0.1642    0.9143
Pt    0.1648    0.1663    0.9557
Pt    0.0375    0.9984    0.9126
Pt    0.1609    0.2061    0.9130
Pt    0.1643    0.2050    0.9555
Pt    0.0172    0.1008    0.9552
Pt    0.0182    0.1048    0.9147
Pt    0.1836    0.1644    0.9347
Pt    0.0173    0.0608    0.9561
Pt    0.0166    0.0614    0.9118
Pt    0.1861    0.1641    0.9745
Pt    0.1812    0.2066    0.8917
Pt    0.2044    0.0410    0.9124
Pt    0.2088    0.0406    0.9561
Pt    0.1855    0.2070    0.9380
Pt    0.2045    0.0825    0.9141
Pt    0.2060    0.0814    0.9546
Pt    0.2279    0.0821    0.9787
Pt    0.2029    0.1230    0.9148
Pt    0.2065    0.1206    0.9541
Pt    0.9965    0.0617    0.8899
Pt    0.2073    0.1675    0.9154
Pt    0.2061    0.1650    0.9559
Pt    0.2048    0.2077    0.8730
Pt    0.2033    0.2064    0.9148
Pt    0.2063    0.2064    0.9554
Pt    0.0165    0.0169    0.9549
Pt    0.0163    0.0197    0.9126
Pt    0.1860    0.2074    0.9774
Pt    0.1841    0.1859    0.9558
Pt    0.1858    0.1851    0.9140
Pt    0.9966    0.1224    0.9539
Pt    0.1854    0.1433    0.9556
Pt    0.1840    0.1455    0.9137
Pt    0.0587    0.2059    0.9761
Pt    0.1864    0.1036    0.9553
Pt    0.1830    0.1029    0.9145
Pt    0.1011    0.2062    0.9758
Pt    0.1871    0.0591    0.9541
Pt    0.1850    0.0620    0.9119
Pt    0.1020    0.2065    0.9348
Pt    0.1852    0.0183    0.9560
Pt    0.1824    0.0169    0.9127
Pt    0.0991    0.2071    0.8930
Pt    0.1453    0.2283    0.9556
Pt    0.1439    0.2282    0.9121
Pt    0.0567    0.2081    0.9356
Pt    0.1424    0.1855    0.9551
Pt    0.1411    0.1832    0.9107
Pt    0.0570    0.2051    0.8924
Pt    0.1422    0.1463    0.9578
Pt    0.1401    0.1450    0.9146
Pt    0.2260    0.0392    0.9322
Pt    0.1449    0.1028    0.9568
Pt    0.1454    0.1025    0.9148
Pt    0.1024    0.1647    0.9774
Pt    0.1436    0.0606    0.9568
Pt    0.1466    0.0607    0.9124
Pt    0.1014    0.1621    0.9348
Pt    0.1463    0.0162    0.9555
Pt    0.1440    0.0191    0.9095
Pt    0.1010    0.1654    0.8910
Pt    0.1006    0.2284    0.9529
Pt    0.1002    0.2254    0.9142
Pt    0.1005    0.1222    0.9759
Pt    0.1028    0.1859    0.9547
Pt    0.0999    0.1855    0.9129
Pt    0.1017    0.1230    0.9329
Pt    0.0371    0.0186    0.8923
Pt    0.0376    0.0196    0.9332
Pt    0.0385    0.0181    0.9753
Pt    0.0362    0.0592    0.8920
Pt    0.0374    0.0615    0.9321
Pt    0.0402    0.0597    0.9751
Pt    0.0397    0.1015    0.8904
Pt    0.0402    0.1018    0.9336
Pt    0.0390    0.1014    0.9744
Pt    0.0387    0.1437    0.8915
Pt    0.0375    0.1465    0.9334
Pt    0.0369    0.1448    0.9775
Pt    0.0354    0.1856    0.8922
Pt    0.0379    0.1854    0.9363
Pt    0.0388    0.1857    0.9763
Pt    0.0391    0.2282    0.8924
Pt    0.0356    0.2266    0.9335
Pt    0.0380    0.2286    0.9755
Pt    0.0803    0.0175    0.8929
Pt    0.0778    0.0189    0.9349
Pt    0.0792    0.0192    0.9761
Pt    0.0797    0.0591    0.8936
Pt    0.0798    0.0603    0.9336
Pt    0.0823    0.0578    0.9736
Pt    0.0812    0.1001    0.8938
Pt    0.0817    0.1028    0.9356
Pt    0.0801    0.0999    0.9786
Pt    0.0781    0.1440    0.8902
Pt    0.0794    0.1415    0.9356
Pt    0.0797    0.1452    0.9796
Pt    0.0789    0.1837    0.8939
Pt    0.0821    0.1855    0.9362
Pt    0.0819    0.1847    0.9738
Pt    0.0784    0.2263    0.8935
Pt    0.0807    0.2274    0.9339
Pt    0.0807    0.2285    0.9762
Pt    0.1214    0.0206    0.8921
Pt    0.1242    0.0214    0.9292
Pt    0.1220    0.0186    0.9778
Pt    0.1243    0.0619    0.8935
Pt    0.1230    0.0613    0.9371
Pt    0.1199    0.0581    0.9740
Pt    0.1230    0.0990    0.8925
Pt    0.1209    0.1030    0.9343
Pt    0.1201    0.1030    0.9752
Pt    0.1220    0.1441    0.8924
Pt    0.1235    0.1460    0.9371
Pt    0.1185    0.1425    0.9758
Pt    0.1188    0.1856    0.8897
Pt    0.1206    0.1856    0.9341
Pt    0.1234    0.1861    0.9752
Pt    0.1223    0.2254    0.8943
Pt    0.1217    0.2275    0.9344
Pt    0.1189    0.2256    0.9737
Pt    0.1662    0.0181    0.8896
Pt    0.1649    0.0191    0.9339
Pt    0.1648    0.0183    0.9788
Pt    0.1655    0.0647    0.8888
Pt    0.1661    0.0608    0.9315
Pt    0.1629    0.0591    0.9753
Pt    0.1646    0.1053    0.8883
Pt    0.1649    0.1018    0.9379
Pt    0.1658    0.1025    0.9763
Pt    0.1621    0.1432    0.8942
Pt    0.1597    0.1443    0.9330
Pt    0.1664    0.1445    0.9766
Pt    0.1617    0.1848    0.8916
Pt    0.1622    0.1842    0.9345
Pt    0.1636    0.1832    0.9778
Pt    0.1634    0.2281    0.8921
Pt    0.1646    0.2268    0.9326
Pt    0.1634    0.2288    0.9763
Pt    0.2036    0.0183    0.8901
Pt    0.2055    0.0200    0.9329
Pt    0.2050    0.0210    0.9774
Pt    0.2055    0.0627    0.8931
Pt    0.2058    0.0590    0.9324
Pt    0.2076    0.0595    0.9753
Pt    0.2049    0.1042    0.8910
Pt    0.2041    0.1024    0.9329
Pt    0.2059    0.1003    0.9759
Pt    0.2060    0.1462    0.8934
Pt    0.2063    0.1457    0.9364
Pt    0.2048    0.1443    0.9774
Pt    0.2049    0.1873    0.8938
Pt    0.2064    0.1850    0.9356
Pt    0.2080    0.1853    0.9743
Pt    0.2061    0.2285    0.8932
Pt    0.2067    0.2278    0.9343
Pt    0.2081    0.2260    0.9768
Pt    0.0977    0.1421    0.9558
Pt    0.1011    0.1420    0.9143
Pt    0.1012    0.1237    0.8909
Pt    0.1005    0.1021    0.9550
Pt    0.1021    0.1030    0.9121
Pt    0.0998    0.0796    0.9767
Pt    0.1011    0.0616    0.9530
Pt    0.1009    0.0612    0.9151
Pt    0.1010    0.0832    0.9345
Pt    0.1027    0.0223    0.9549
Pt    0.1021    0.0161    0.9125
Pt    0.1003    0.0801    0.8934
Pt    0.0588    0.2266    0.9568
Pt    0.0570    0.2279    0.9142
Pt    0.1004    0.0390    0.9773
Pt    0.0608    0.1853    0.9523
Pt    0.0603    0.1847    0.9162
Pt    0.1031    0.0406    0.9354
Pt    0.2295    0.2035    0.9760
Pt    0.2268    0.2064    0.9349
Pt    0.2253    0.2071    0.8942
Pt    0.0173    0.0372    0.8893
Pt    0.0168    0.0398    0.9326
Pt    0.0201    0.0403    0.9775
Pt    0.0173    0.0807    0.8916
Pt    0.0164    0.0810    0.9335
Pt    0.0189    0.0817    0.9742
Pt    0.0189    0.1232    0.8918
Pt    0.0192    0.1246    0.9339
Pt    0.0156    0.1226    0.9757
Pt    0.0166    0.1635    0.8920
Pt    0.0177    0.1646    0.9354
Pt    0.0174    0.1646    0.9761
Pt    0.0146    0.2066    0.8918
Pt    0.0165    0.2042    0.9348
Pt    0.0178    0.2078    0.9773
Pt    0.2285    0.1653    0.9755
Pt    0.2277    0.1643    0.9357
Pt    0.2252    0.1656    0.8931
Pt    0.2255    0.1233    0.9770
Pt    0.2238    0.1237    0.9310
Pt    0.2246    0.1266    0.8934
Pt    0.0593    0.0390    0.8929
Pt    0.0571    0.0397    0.9362
Pt    0.0609    0.0392    0.9774
Pt    0.0576    0.0777    0.8926
Pt    0.0614    0.0806    0.9357
Pt    0.0614    0.0803    0.9770
Pt    0.0615    0.1219    0.8917
Pt    0.0578    0.1249    0.9327
Pt    0.0576    0.1201    0.9760
Pt    0.0568    0.1641    0.8962
Pt    0.0597    0.1622    0.9345
Pt    0.0581    0.1647    0.9754
Pt    0.1195    0.9985    0.9552
Pt    0.2252    0.9992    0.9760
Pt    0.0581    0.0586    0.8726
Pt    0.9979    0.2263    0.9332
Pt    0.0338    0.2058    0.8738
Pt    0.0995    0.0589    0.8734
Pt    0.2062    0.9985    0.9537
Pt    0.9968    0.0184    0.9340
Pt    0.9984    0.1046    0.9348
Pt    0.0183    0.9978    0.9331
Pt    0.0399    0.0369    0.8731
Pt    0.9996    0.0617    0.9770
Pt    0.9975    0.1875    0.9791
Pt    0.1431    0.9986    0.9732
Pt    0.9969    0.1426    0.8919
Pt    0.0571    0.2257    0.8720
Pt    0.0147    0.9985    0.8916
Pt    0.0776    0.1648    0.8723
Pt    0.9966    0.1440    0.9771
Pt    0.1835    0.2277    0.8735
Pt    0.0585    0.9970    0.9745
Pt    0.2290    0.9972    0.9343
Pt    0.1855    0.9973    0.8895
Pt    0.1001    0.1028    0.8726
Pt    0.1657    0.9970    0.9548
Pt    0.0782    0.9986    0.9134
Pt    0.0373    0.2458    0.9536
Pt    0.9969    0.9982    0.9144
Pt    0.9970    0.0808    0.9549
Pt    0.2035    0.9992    0.9121
Pt    0.9981    0.0166    0.9764
Pt    0.0793    0.9985    0.9532
Pt    0.9974    0.1656    0.9554
Pt    0.1203    0.0419    0.8732
Pt    0.1213    0.1192    0.8720
Pt    0.0167    0.1024    0.8724
Pt    0.2041    0.1644    0.8732
Pt    0.1028    0.9986    0.8927
Pt    0.2267    0.9997    0.8890
Pt    0.1002    0.0014    0.9774
Pt    0.9970    0.0818    0.9136
Pt    0.2253    0.1861    0.8722
Pt    0.2459    0.0584    0.8906
Pt    0.0592    0.9975    0.8923
Pt    0.2460    0.0790    0.9098
Pt    0.0770    0.2073    0.8732
Pt    0.1865    0.0610    0.8724
Pt    0.1614    0.9968    0.9139
Pt    0.2292    0.2465    0.8926
Pt    0.0134    0.1826    0.8728
Pt    0.1242    0.2465    0.8725
Pt    0.1045    0.1852    0.9965
Pt    0.1212    0.2081    0.8726
Pt    0.1213    0.9984    0.9951
Pt    0.1427    0.2456    0.8913
Pt    0.0772    0.0777    0.8735
Pt    0.9977    0.0411    0.9574
Pt    0.0770    0.9969    0.9953
Pt    0.0170    0.2275    0.8725
Pt    0.0611    0.0158    0.8729
Pt    0.2279    0.1463    0.9955
Pt    0.0566    0.1849    0.8727
Pt    0.0586    0.2453    0.9359
Pt    0.0392    0.1234    0.9961
Pt    0.1194    0.1660    0.8720
Pt    0.0159    0.2463    0.9337
Pt    0.1845    0.1847    0.8723
Pt    0.2449    0.1195    0.9544
Pt    0.0180    0.1008    0.9957
Pt    0.1420    0.0215    0.8720
Pt    0.1224    0.0396    0.9954
Pt    0.1416    0.0609    0.9948
Pt    0.1207    0.1220    0.9962
Pt    0.2045    0.1257    0.8725
Pt    0.0591    0.2277    0.9954
Pt    0.0572    0.0198    0.9953
Pt    0.2285    0.1035    0.9938
Pt    0.1428    0.0181    0.9964
Pt    0.1857    0.0614    0.9927
Pt    0.0814    0.0397    0.8742
Pt    0.0594    0.1006    0.9958
Pt    0.0818    0.2069    0.9944
Pt    0.1652    0.2046    0.9953
Pt    0.2269    0.2282    0.9955
Pt    0.1850    0.1433    0.9960
Pt    0.2040    0.1659    0.9962
Pt    0.0610    0.0605    0.9955
Pt    0.0788    0.1241    0.9960
Pt    0.1640    0.1232    0.9954
Pt    0.0824    0.1647    0.9962
Pt    0.0381    0.9969    0.9964
Pt    0.0380    0.9988    0.8716
Pt    0.0597    0.1007    0.8718
Pt    0.0829    0.4182    0.9990
Pt    0.1204    0.4157    0.9986
Pt    0.9965    0.4351    0.0155
Pt    0.0366    0.3763    0.0003
Pt    0.2264    0.2491    0.1002
Pt    0.9984    0.4339    0.0601
Pt    0.0172    0.4336    0.9970
Pt    0.9969    0.4115    0.9985
Pt    0.1851    0.2496    0.0189
Pt    0.0591    0.4925    0.0991
Pt    0.0774    0.2870    0.9967
Pt    0.0589    0.4947    0.0593
Pt    0.2268    0.3545    0.0756
Pt    0.0374    0.2500    0.0813
Pt    0.1443    0.2489    0.0604
Pt    0.2285    0.3561    0.0413
Pt    0.1234    0.4931    0.0774
Pt    0.1883    0.4778    0.0124
Pt    0.1221    0.4163    0.1170
Pt    0.1234    0.2477    0.0800
Pt    0.2255    0.3114    0.0792
Pt    0.2425    0.3580    0.0157
Pt    0.2071    0.2904    0.9969
Pt    0.0372    0.2903    0.0417
Pt    0.0378    0.2900    0.0829
Pt    0.1656    0.2478    0.0389
Pt    0.2071    0.2491    0.0798
Pt    0.0385    0.3348    0.0403
Pt    0.0414    0.3335    0.0845
Pt    0.2275    0.3102    0.9970
Pt    0.1421    0.2708    0.9974
Pt    0.0391    0.3718    0.0411
Pt    0.9975    0.4564    0.0398
Pt    0.0404    0.4117    0.0407
Pt    0.1915    0.4500    0.0092
Pt    0.0380    0.4542    0.0367
Pt    0.0350    0.4553    0.0823
Pt    0.0793    0.2483    0.0396
Pt    0.2290    0.2482    0.0172
Pt    0.1824    0.3525    0.1189
Pt    0.0154    0.2491    0.0601
Pt    0.0787    0.2883    0.0366
Pt    0.0825    0.2890    0.0796
Pt    0.2097    0.4612    0.0518
Pt    0.2293    0.2486    0.0600
Pt    0.0818    0.3311    0.0384
Pt    0.0789    0.3329    0.0810
Pt    0.0580    0.3923    0.0006
Pt    0.1443    0.2680    0.1202
Pt    0.1000    0.2482    0.0575
Pt    0.2350    0.4346    0.0062
Pt    0.0837    0.4536    0.0377
Pt    0.0799    0.4527    0.0761
Pt    0.0803    0.4967    0.0787
Pt    0.1872    0.2669    0.0777
Pt    0.1005    0.4934    0.0988
Pt    0.0384    0.4965    0.0371
Pt    0.2057    0.2479    0.0379
Pt    0.2260    0.4380    0.0496
Pt    0.1210    0.2875    0.0340
Pt    0.1195    0.2880    0.0773
Pt    0.0575    0.4366    0.9979
Pt    0.1427    0.2472    0.0184
Pt    0.1213    0.3302    0.0407
Pt    0.1211    0.3340    0.0786
Pt    0.1642    0.3749    0.0015
Pt    0.1864    0.2473    0.0995
Pt    0.0154    0.4898    0.1042
Pt    0.0649    0.3992    0.0439
Pt    0.0165    0.3552    0.9986
Pt    0.1233    0.4573    0.0811
Pt    0.1440    0.4784    0.1198
Pt    0.2104    0.4721    0.9992
Pt    0.1379    0.3929    0.1201
Pt    0.2096    0.4281    0.0058
Pt    0.1640    0.2890    0.0386
Pt    0.1657    0.2877    0.0819
Pt    0.1406    0.4962    0.0986
Pt    0.0374    0.2920    0.9972
Pt    0.1640    0.3305    0.0376
Pt    0.1621    0.3302    0.0788
Pt    0.0358    0.3335    0.9982
Pt    0.9965    0.3330    0.0436
Pt    0.9977    0.3533    0.0616
Pt    0.1871    0.3554    0.9981
Pt    0.0834    0.4510    0.1164
Pt    0.1622    0.2921    0.9975
Pt    0.2056    0.2882    0.0370
Pt    0.2077    0.2900    0.0811
Pt    0.0393    0.2493    0.0402
Pt    0.1011    0.3091    0.0371
Pt    0.2034    0.3332    0.0377
Pt    0.2047    0.3305    0.0782
Pt    0.0177    0.4950    0.0178
Pt    0.0167    0.4332    0.0405
Pt    0.9967    0.2710    0.1014
Pt    0.1000    0.2674    0.0815
Pt    0.2267    0.3142    0.0395
Pt    0.0168    0.3933    0.9983
Pt    0.0993    0.2681    0.0353
Pt    0.1421    0.2687    0.0791
Pt    0.0632    0.3566    0.0804
Pt    0.1893    0.4597    0.0335
Pt    0.1028    0.2471    0.1028
Pt    0.0628    0.4952    0.0198
Pt    0.0588    0.4721    0.0800
Pt    0.0148    0.3944    0.0804
Pt    0.1041    0.4341    0.1183
Pt    0.1177    0.3759    0.0009
Pt    0.2281    0.2687    0.0789
Pt    0.9973    0.4556    0.0795
Pt    0.9991    0.3330    0.0839
Pt    0.0592    0.3526    0.0383
Pt    0.9969    0.3096    0.0612
Pt    0.1820    0.2679    0.0380
Pt    0.0601    0.4734    0.0371
Pt    0.0200    0.3564    0.0868
Pt    0.0179    0.3896    0.0420
Pt    0.1618    0.3336    0.0023
Pt    0.0125    0.3095    0.9980
Pt    0.0593    0.2706    0.0816
Pt    0.0571    0.2718    0.0453
Pt    0.0165    0.3523    0.0389
Pt    0.0589    0.4322    0.0426
Pt    0.1444    0.2694    0.0381
Pt    0.2367    0.4696    0.0377
Pt    0.2261    0.2700    0.0373
Pt    0.1417    0.3100    0.0804
Pt    0.2043    0.3346    0.1180
Pt    0.9966    0.3106    0.1027
Pt    0.0364    0.2709    0.0200
Pt    0.0356    0.2684    0.0609
Pt    0.0389    0.2683    0.1023
Pt    0.0377    0.3129    0.0192
Pt    0.0382    0.3121    0.0619
Pt    0.0390    0.3118    0.1031
Pt    0.0381    0.3521    0.0194
Pt    0.0408    0.3569    0.0635
Pt    0.0389    0.3531    0.1060
Pt    0.0375    0.3938    0.0211
Pt    0.0369    0.3915    0.0636
Pt    0.0407    0.4335    0.0201
Pt    0.0385    0.4321    0.0621
Pt    0.0394    0.4755    0.0167
Pt    0.0357    0.4783    0.0604
Pt    0.0424    0.4728    0.1017
Pt    0.0782    0.2658    0.0176
Pt    0.0795    0.2702    0.0619
Pt    0.0807    0.2702    0.1019
Pt    0.0781    0.3107    0.0174
Pt    0.0828    0.3094    0.0608
Pt    0.0803    0.3133    0.1024
Pt    0.0784    0.3499    0.0194
Pt    0.0808    0.3529    0.0578
Pt    0.0995    0.3511    0.0798
Pt    0.0826    0.3951    0.0197
Pt    0.0804    0.4330    0.0212
Pt    0.0834    0.4750    0.0203
Pt    0.0782    0.4746    0.0568
Pt    0.0814    0.4728    0.0963
Pt    0.1211    0.2671    0.0148
Pt    0.1208    0.2688    0.0592
Pt    0.1220    0.2667    0.1012
Pt    0.1207    0.3101    0.0181
Pt    0.1215    0.3079    0.0572
Pt    0.1195    0.3104    0.1021
Pt    0.1215    0.3538    0.0184
Pt    0.1240    0.3541    0.0962
Pt    0.1246    0.4344    0.0964
Pt    0.1205    0.4769    0.1013
Pt    0.1623    0.2709    0.0166
Pt    0.1642    0.2686    0.0602
Pt    0.1667    0.2686    0.1027
Pt    0.1603    0.3103    0.0178
Pt    0.1638    0.3073    0.0615
Pt    0.1618    0.3117    0.0997
Pt    0.1661    0.3550    0.0212
Pt    0.1663    0.3515    0.0587
Pt    0.1625    0.3539    0.0981
Pt    0.1420    0.4121    0.1002
Pt    0.2062    0.2684    0.0169
Pt    0.2069    0.2668    0.0561
Pt    0.2045    0.2692    0.1010
Pt    0.2070    0.3118    0.0191
Pt    0.2055    0.3123    0.0586
Pt    0.2050    0.3125    0.1024
Pt    0.2060    0.3535    0.0971
Pt    0.2069    0.3917    0.1000
Pt    0.1003    0.4729    0.0737
Pt    0.1409    0.3769    0.0970
Pt    0.0181    0.4759    0.0821
Pt    0.1408    0.3100    0.0395
Pt    0.1023    0.4731    0.0401
Pt    0.0999    0.3523    1.0000
Pt    0.1854    0.3523    0.0786
Pt    0.1627    0.4123    0.1186
Pt    0.0169    0.4766    0.0399
Pt    0.0377    0.4545    0.9976
Pt    0.1456    0.3532    0.0775
Pt    0.0164    0.2917    0.0208
Pt    0.0189    0.2912    0.0617
Pt    0.0172    0.2911    0.1016
Pt    0.0151    0.3294    0.0179
Pt    0.0232    0.3357    0.0659
Pt    0.0180    0.3309    0.1055
Pt    0.0157    0.3735    0.0206
Pt    0.0178    0.3708    0.0636
Pt    0.0191    0.4149    0.0168
Pt    0.0183    0.4130    0.0602
Pt    0.0168    0.4561    0.0170
Pt    0.0178    0.4538    0.0599
Pt    0.1860    0.3098    0.0798
Pt    0.1224    0.3520    0.0586
Pt    0.1847    0.3080    0.0394
Pt    0.0562    0.2919    0.0196
Pt    0.0576    0.2912    0.0639
Pt    0.0616    0.2903    0.1018
Pt    0.0580    0.3316    0.0168
Pt    0.0601    0.3316    0.0599
Pt    0.0610    0.3348    0.1054
Pt    0.0624    0.3759    0.0216
Pt    0.0611    0.3740    0.0590
Pt    0.0606    0.4129    0.0182
Pt    0.0604    0.4533    0.0197
Pt    0.0552    0.4545    0.0599
Pt    0.1023    0.4375    0.9980
Pt    0.1449    0.3508    0.0370
Pt    0.0184    0.4321    0.0805
Pt    0.0981    0.2889    0.0164
Pt    0.0999    0.2882    0.0566
Pt    0.0999    0.2900    0.1003
Pt    0.1028    0.3311    0.0183
Pt    0.0999    0.3310    0.0597
Pt    0.0994    0.3344    0.1025
Pt    0.1038    0.4540    0.0985
Pt    0.1012    0.3521    0.0374
Pt    0.0593    0.2480    0.0615
Pt    0.2094    0.4788    0.0287
Pt    0.1421    0.2907    0.0158
Pt    0.1430    0.2881    0.0608
Pt    0.1443    0.2885    0.1019
Pt    0.1384    0.3315    0.0189
Pt    0.1413    0.3318    0.0598
Pt    0.1425    0.3327    0.0977
Pt    0.1433    0.4585    0.0993
Pt    0.1827    0.3919    0.1194
Pt    0.1853    0.2905    0.0161
Pt    0.1868    0.2870    0.0579
Pt    0.1855    0.2908    0.1005
Pt    0.1845    0.3315    0.0174
Pt    0.1841    0.3286    0.0581
Pt    0.1834    0.3310    0.0976
Pt    0.1845    0.3730    0.0980
Pt    0.1638    0.3928    0.0972
Pt    0.2274    0.2895    0.0178
Pt    0.2261    0.2906    0.0579
Pt    0.2269    0.2925    0.0999
Pt    0.2264    0.3314    0.0180
Pt    0.2275    0.3335    0.0602
Pt    0.2274    0.3321    0.0986
Pt    0.2259    0.3741    0.0992
Pt    0.0607    0.3116    0.0825
Pt    0.1013    0.3143    0.0820
Pt    0.0150    0.2685    0.0402
Pt    0.0166    0.2708    0.0816
Pt    0.0591    0.2472    0.0998
Pt    0.0800    0.3743    0.9991
Pt    0.0180    0.3143    0.0420
Pt    0.0183    0.3106    0.0821
Pt    0.0590    0.3102    0.0412
Pt    0.2010    0.4120    0.1202
Pt    0.1224    0.2493    0.0415
Pt    0.0168    0.2499    0.0201
Pt    0.1863    0.2677    0.9969
Pt    0.2260    0.4191    0.0284
Pt    0.1027    0.4962    0.0157
Pt    0.2038    0.4358    0.0335
Pt    0.2286    0.4877    0.0156
Pt    0.0063    0.4623    0.1033
Pt    0.1837    0.3098    0.9972
Pt    0.2203    0.4544    0.0206
Pt    0.0337    0.2488    0.9977
Pt    0.2062    0.3333    0.9983
Pt    0.1240    0.4965    0.1205
Pt    0.1419    0.3971    0.0020
Pt    0.9966    0.2891    0.1208
Pt    0.0557    0.3567    0.9988
Pt    0.0624    0.4743    0.0008
Pt    0.2263    0.3952    0.1183
Pt    0.0177    0.4736    0.9969
Pt    0.1408    0.3519    0.1192
Pt    0.1435    0.3543    0.0013
Pt    0.1956    0.4855    0.0518
Pt    0.1438    0.4342    0.1173
Pt    0.2048    0.3723    0.1201
Pt    0.2259    0.3525    0.1192
Pt    0.1636    0.3307    0.1201
Pt    0.2208    0.4940    0.0482
Pt    0.1602    0.3728    0.1191
Pt    0.1245    0.4538    0.1198
Pt    0.2462    0.3539    0.0983
Pt    0.2368    0.4640    0.0032
Pt    0.2463    0.3115    0.0585
Pt    0.2456    0.2907    0.0791
Pt    0.1437    0.2482    0.0998
Pt    0.0562    0.2497    0.0161
Pt    0.1406    0.3121    0.1185
Pt    0.2278    0.2708    0.1188
Pt    0.1225    0.2894    0.1198
Pt    0.0798    0.4911    0.1189
Pt    0.0800    0.2480    0.9976
Pt    0.0985    0.4760    0.9976
Pt    0.1680    0.4949    0.1188
Pt    0.1007    0.3963    0.9973
Pt    0.0799    0.4524    0.0003
Pt    0.0985    0.3527    0.1207
Pt    0.0616    0.2684    0.1209
Pt    0.2247    0.3135    0.1202
Pt    0.0783    0.3306    0.9968
Pt    0.1854    0.2708    0.1215
Pt    0.1025    0.4714    0.1216
Pt    0.1641    0.2492    0.1652
Pt    0.0793    0.2499    0.1655
Pt    0.0802    0.2480    0.2053
Pt    0.0583    0.2486    0.1865
Pt    0.0009    0.3551    0.2216
Pt    0.2263    0.4748    0.2013
Pt    0.2248    0.4763    0.1577
Pt    0.1204    0.2476    0.2078
Pt    0.2262    0.4362    0.1981
Pt    0.2254    0.4363    0.1588
Pt    0.0378    0.2920    0.1662
Pt    0.0368    0.2891    0.2074
Pt    0.2282    0.2477    0.1450
Pt    0.0372    0.3320    0.1664
Pt    0.0365    0.3340    0.2070
Pt    0.2044    0.2482    0.1625
Pt    0.2461    0.3094    0.2265
Pt    0.0774    0.2870    0.1650
Pt    0.0758    0.2931    0.2070
Pt    0.2275    0.2479    0.1844
Pt    0.0770    0.3329    0.1683
Pt    0.0759    0.3348    0.2112
Pt    0.9993    0.2897    0.1641
Pt    0.1648    0.4907    0.1621
Pt    0.1224    0.2891    0.1654
Pt    0.1197    0.2925    0.2072
Pt    0.1008    0.2478    0.1443
Pt    0.1183    0.3322    0.1648
Pt    0.1168    0.3332    0.2072
Pt    0.0568    0.2499    0.2244
Pt    0.1215    0.3739    0.1630
Pt    0.1184    0.3756    0.2061
Pt    0.0608    0.3098    0.1248
Pt    0.1213    0.4176    0.1640
Pt    0.1217    0.4179    0.2006
Pt    0.1815    0.4965    0.2220
Pt    0.0009    0.3617    0.1451
Pt    0.0585    0.2484    0.1458
Pt    0.1625    0.2911    0.1631
Pt    0.1596    0.2876    0.2105
Pt    0.1030    0.2491    0.1862
Pt    0.1644    0.3339    0.1616
Pt    0.1614    0.3339    0.2061
Pt    0.1030    0.2497    0.2289
Pt    0.1632    0.3758    0.1611
Pt    0.1583    0.3733    0.2038
Pt    0.0415    0.2873    0.1231
Pt    0.1593    0.4157    0.1608
Pt    0.1626    0.4171    0.2035
Pt    0.1620    0.4944    0.2459
Pt    0.1627    0.4592    0.1638
Pt    0.1619    0.4531    0.2002
Pt    0.1173    0.3694    0.1244
Pt    0.0159    0.2499    0.2289
Pt    0.2287    0.2479    0.2263
Pt    0.9973    0.3100    0.1412
Pt    0.2043    0.2911    0.1613
Pt    0.2022    0.2918    0.2033
Pt    0.9970    0.2485    0.1660
Pt    0.2033    0.3320    0.1634
Pt    0.2038    0.3335    0.2045
Pt    0.9978    0.2698    0.1431
Pt    0.2040    0.3716    0.1623
Pt    0.2039    0.3704    0.2035
Pt    0.1428    0.2480    0.1458
Pt    0.2041    0.4184    0.1576
Pt    0.2051    0.4154    0.2014
Pt    0.2059    0.4943    0.2019
Pt    0.2049    0.4557    0.1559
Pt    0.2053    0.4532    0.2006
Pt    0.9984    0.3750    0.1678
Pt    0.1625    0.2506    0.2045
Pt    0.2063    0.2493    0.2436
Pt    0.0138    0.4908    0.2203
Pt    0.1400    0.4960    0.1830
Pt    0.1840    0.4952    0.1832
Pt    0.9985    0.3773    0.1221
Pt    0.2272    0.3124    0.2029
Pt    0.2255    0.4360    0.2436
Pt    0.2269    0.3095    0.1604
Pt    0.1011    0.2689    0.1218
Pt    0.0143    0.3524    0.1224
Pt    0.2027    0.3736    0.2458
Pt    0.1021    0.3101    0.1261
Pt    0.2437    0.4965    0.2023
Pt    0.2026    0.4170    0.2448
Pt    0.2449    0.4594    0.2456
Pt    0.2241    0.2702    0.2007
Pt    0.0174    0.2496    0.1442
Pt    0.1827    0.3532    0.2017
Pt    0.2268    0.2693    0.1628
Pt    0.2259    0.3506    0.2042
Pt    0.0168    0.2514    0.1874
Pt    0.2458    0.3934    0.1405
Pt    0.1397    0.4417    0.1648
Pt    0.1821    0.3543    0.1620
Pt    0.1820    0.4756    0.2034
Pt    0.1865    0.4750    0.1589
Pt    0.2454    0.2898    0.2051
Pt    0.1404    0.3969    0.2053
Pt    0.2244    0.3939    0.2009
Pt    0.2234    0.3919    0.1588
Pt    0.1788    0.3105    0.2059
Pt    0.0375    0.2682    0.1463
Pt    0.0384    0.2700    0.1855
Pt    0.0359    0.2697    0.2273
Pt    0.0386    0.3119    0.1459
Pt    0.0405    0.3130    0.1884
Pt    0.0382    0.3116    0.2318
Pt    0.0400    0.3533    0.1451
Pt    0.0336    0.3534    0.2275
Pt    0.0811    0.2686    0.1423
Pt    0.0787    0.2699    0.1867
Pt    0.0809    0.2669    0.2271
Pt    0.0797    0.3126    0.1446
Pt    0.0779    0.3118    0.1872
Pt    0.0767    0.3115    0.2286
Pt    0.0744    0.3576    0.1500
Pt    0.0741    0.3591    0.1822
Pt    0.0746    0.3563    0.2287
Pt    0.0977    0.3727    0.1479
Pt    0.1227    0.2694    0.1427
Pt    0.1229    0.2710    0.1875
Pt    0.1214    0.2713    0.2324
Pt    0.1208    0.3117    0.1441
Pt    0.1213    0.3111    0.1840
Pt    0.1191    0.3136    0.2280
Pt    0.1183    0.3513    0.1431
Pt    0.1187    0.3534    0.1847
Pt    0.1168    0.3556    0.2266
Pt    0.1219    0.3931    0.1425
Pt    0.1189    0.3960    0.1827
Pt    0.1193    0.3971    0.2258
Pt    0.1251    0.4360    0.1418
Pt    0.1220    0.4773    0.1393
Pt    0.1665    0.2693    0.1414
Pt    0.1630    0.2705    0.1859
Pt    0.1636    0.2680    0.2261
Pt    0.1640    0.3112    0.1437
Pt    0.1608    0.3160    0.1826
Pt    0.1594    0.3111    0.2281
Pt    0.1616    0.3544    0.1397
Pt    0.1606    0.3543    0.1817
Pt    0.1607    0.3535    0.2268
Pt    0.1597    0.3930    0.1401
Pt    0.1620    0.3958    0.1833
Pt    0.1612    0.3937    0.2227
Pt    0.1578    0.4360    0.1415
Pt    0.1655    0.4346    0.1800
Pt    0.1615    0.4376    0.2256
Pt    0.1690    0.4749    0.1373
Pt    0.1605    0.4764    0.1855
Pt    0.1582    0.4757    0.2215
Pt    0.2063    0.2676    0.1416
Pt    0.2030    0.2698    0.1826
Pt    0.2055    0.2723    0.2262
Pt    0.2050    0.3125    0.1428
Pt    0.2056    0.3103    0.1827
Pt    0.2025    0.3113    0.2240
Pt    0.2041    0.3527    0.1413
Pt    0.2043    0.3516    0.1829
Pt    0.2001    0.3533    0.2264
Pt    0.2068    0.3948    0.1389
Pt    0.2041    0.3908    0.1835
Pt    0.2018    0.3910    0.2228
Pt    0.2030    0.4372    0.1775
Pt    0.2048    0.4366    0.2245
Pt    0.2046    0.4767    0.1809
Pt    0.2021    0.4739    0.2205
Pt    0.2065    0.4945    0.1595
Pt    0.1837    0.3097    0.1619
Pt    0.1398    0.3967    0.1645
Pt    0.1623    0.2921    0.1237
Pt    0.2251    0.4967    0.1813
Pt    0.1849    0.4364    0.2028
Pt    0.2429    0.3909    0.2240
Pt    0.1805    0.4415    0.1571
Pt    0.0004    0.3336    0.1642
Pt    0.0798    0.3315    0.1253
Pt    0.1397    0.4966    0.2254
Pt    0.1862    0.2687    0.2055
Pt    0.1866    0.4964    0.1396
Pt    0.0394    0.2485    0.1245
Pt    0.1399    0.3527    0.2057
Pt    0.2462    0.3310    0.1632
Pt    0.1400    0.2474    0.1865
Pt    0.1395    0.3528    0.1612
Pt    0.0199    0.2905    0.1443
Pt    0.0159    0.2886    0.1863
Pt    0.0161    0.2903    0.2298
Pt    0.0226    0.3342    0.1443
Pt    0.0154    0.3308    0.1885
Pt    0.0175    0.3310    0.2272
Pt    0.1818    0.2718    0.1638
Pt    0.0580    0.2913    0.1458
Pt    0.0583    0.2900    0.1852
Pt    0.0572    0.2907    0.2294
Pt    0.0597    0.3323    0.1459
Pt    0.0578    0.3340    0.1895
Pt    0.0553    0.3340    0.2318
Pt    0.1027    0.2897    0.1442
Pt    0.0998    0.2926    0.1855
Pt    0.0976    0.2914    0.2277
Pt    0.0970    0.3338    0.1467
Pt    0.0977    0.3332    0.1890
Pt    0.0965    0.3351    0.2283
Pt    0.0977    0.3764    0.1819
Pt    0.0971    0.3768    0.2287
Pt    0.1035    0.3952    0.1613
Pt    0.1044    0.4524    0.1399
Pt    0.2464    0.3514    0.2262
Pt    0.1409    0.2920    0.1396
Pt    0.1425    0.2900    0.1874
Pt    0.1379    0.2934    0.2288
Pt    0.1424    0.3306    0.1411
Pt    0.1396    0.3344    0.1830
Pt    0.1387    0.3326    0.2251
Pt    0.1402    0.3711    0.1383
Pt    0.1399    0.3779    0.1848
Pt    0.1391    0.3746    0.2270
Pt    0.1416    0.4134    0.1390
Pt    0.1419    0.4168    0.1822
Pt    0.1392    0.4170    0.2220
Pt    0.1435    0.4594    0.1408
Pt    0.2428    0.4139    0.1604
Pt    0.1382    0.4375    0.2443
Pt    0.2278    0.3520    0.1630
Pt    0.1844    0.2897    0.1439
Pt    0.1794    0.2921    0.1856
Pt    0.1828    0.2912    0.2264
Pt    0.1836    0.3322    0.1386
Pt    0.1837    0.3315    0.1833
Pt    0.1818    0.3319    0.2248
Pt    0.1857    0.3737    0.1390
Pt    0.1815    0.3741    0.1816
Pt    0.1826    0.3733    0.2254
Pt    0.1822    0.4153    0.1379
Pt    0.1825    0.4129    0.1787
Pt    0.1842    0.4147    0.2248
Pt    0.1837    0.4585    0.1800
Pt    0.1811    0.4563    0.2238
Pt    0.2436    0.4333    0.2213
Pt    0.2249    0.3511    0.2442
Pt    0.0063    0.4679    0.2331
Pt    0.2280    0.2898    0.1410
Pt    0.2246    0.2894    0.1821
Pt    0.2227    0.2926    0.2237
Pt    0.2257    0.3328    0.1415
Pt    0.2240    0.3311    0.1808
Pt    0.2254    0.3307    0.2269
Pt    0.2228    0.3715    0.1406
Pt    0.2247    0.3733    0.1818
Pt    0.2224    0.3723    0.2253
Pt    0.2270    0.4172    0.1348
Pt    0.2187    0.4136    0.1787
Pt    0.2224    0.4116    0.2238
Pt    0.2224    0.4560    0.1794
Pt    0.2270    0.4559    0.2240
Pt    0.1171    0.3378    0.2465
Pt    0.1661    0.2477    0.1219
Pt    0.2242    0.3941    0.2451
Pt    0.0168    0.2690    0.1665
Pt    0.0158    0.2705    0.2086
Pt    0.2433    0.4143    0.2007
Pt    0.0151    0.3116    0.1659
Pt    0.0184    0.3118    0.2087
Pt    0.1629    0.2883    0.2446
Pt    0.0199    0.3534    0.1662
Pt    0.1808    0.3928    0.2051
Pt    0.0363    0.2483    0.1673
Pt    0.0562    0.2673    0.1666
Pt    0.0596    0.2689    0.2062
Pt    0.1419    0.3522    0.2445
Pt    0.0583    0.3103    0.1663
Pt    0.0564    0.3126    0.2098
Pt    0.2442    0.3945    0.1814
Pt    0.0536    0.3518    0.1686
Pt    0.1823    0.3956    0.2450
Pt    0.1013    0.2715    0.1676
Pt    0.0995    0.2693    0.2062
Pt    0.1407    0.4748    0.1642
Pt    0.0991    0.3119    0.1637
Pt    0.0981    0.3141    0.2078
Pt    0.2459    0.2671    0.1838
Pt    0.0973    0.3536    0.1686
Pt    0.0966    0.3577    0.2079
Pt    0.2065    0.2499    0.2039
Pt    0.0996    0.3965    0.2038
Pt    0.1430    0.3128    0.2046
Pt    0.1057    0.4179    0.1422
Pt    0.1410    0.2694    0.1668
Pt    0.1385    0.2703    0.2104
Pt    0.1869    0.3946    0.1566
Pt    0.1418    0.3094    0.1627
Pt    0.2452    0.4779    0.2247
Pt    0.1611    0.4956    0.2035
Pt    0.2434    0.4151    0.2430
Pt    0.1589    0.4604    0.2450
Pt    0.2090    0.2474    0.1226
Pt    0.2277    0.3120    0.2457
Pt    0.0405    0.3313    0.1258
Pt    0.0213    0.3086    0.1227
Pt    0.1845    0.2479    0.2257
Pt    0.1206    0.2510    0.1660
Pt    0.1857    0.2493    0.1844
Pt    0.0185    0.2709    0.1233
Pt    0.2049    0.4959    0.2440
Pt    0.2462    0.3518    0.1843
Pt    0.0813    0.2928    0.1237
Pt    0.1235    0.2489    0.1235
Pt    0.2009    0.3306    0.2453
Pt    0.1853    0.4775    0.2428
Pt    0.2446    0.4360    0.1405
Pt    0.1452    0.4938    0.1426
Pt    0.2260    0.4940    0.1367
Pt    0.2450    0.4554    0.2005
Pt    0.2040    0.4567    0.2442
Pt    0.2423    0.2709    0.2232
Pt    0.1205    0.4947    0.1617
Pt    0.2445    0.3707    0.2445
Pt    0.2442    0.4351    0.1769
Pt    0.2253    0.4764    0.2434
Pt    0.1601    0.3768    0.2458
Pt    0.1407    0.3971    0.2450
Pt    0.1221    0.3324    0.1227
Pt    0.2455    0.3734    0.1630
Pt    0.1834    0.4380    0.2452
Pt    0.9981    0.2504    0.1218
Pt    0.0983    0.4911    0.1386
Pt    0.2068    0.2915    0.1219
Pt    0.1838    0.2700    0.2452
Pt    0.0815    0.2504    0.2458
Pt    0.1211    0.4163    0.2456
Pt    0.1203    0.3767    0.2465
Pt    0.1822    0.3554    0.2466
Pt    0.1836    0.3105    0.1217
Pt    0.2454    0.3531    0.3104
Pt    0.2217    0.4751    0.3293
Pt    0.2262    0.4763    0.2848
Pt    0.2458    0.2470    0.2889
Pt    0.2251    0.4349    0.3292
Pt    0.2253    0.4341    0.2817
Pt    0.0562    0.2520    0.3524
Pt    0.2287    0.3936    0.3301
Pt    0.2255    0.3939    0.2887
Pt    0.0370    0.2904    0.2952
Pt    0.0363    0.2907    0.3319
Pt    0.1629    0.3326    0.2467
Pt    0.0371    0.3314    0.2907
Pt    0.0337    0.3296    0.3352
Pt    0.0369    0.2903    0.2504
Pt    0.0311    0.3764    0.2901
Pt    0.0340    0.3709    0.3336
Pt    0.2041    0.2892    0.2481
Pt    0.0357    0.4154    0.2852
Pt    0.0341    0.4126    0.3350
Pt    0.1791    0.2482    0.3519
Pt    0.0372    0.4363    0.2671
Pt    0.0372    0.4585    0.3247
Pt    0.1222    0.2478    0.2875
Pt    0.0805    0.2897    0.2919
Pt    0.0791    0.2941    0.3359
Pt    0.2255    0.2472    0.3094
Pt    0.0765    0.3348    0.2887
Pt    0.0779    0.3355    0.3321
Pt    0.1625    0.2476    0.2508
Pt    0.0759    0.3808    0.2900
Pt    0.0770    0.3743    0.3292
Pt    0.1405    0.4770    0.3313
Pt    0.0760    0.4188    0.2931
Pt    0.0779    0.4164    0.3306
Pt    0.0170    0.2503    0.2693
Pt    0.0798    0.4572    0.2891
Pt    0.0798    0.4569    0.3340
Pt    0.2462    0.4774    0.2668
Pt    0.1390    0.4776    0.2882
Pt    0.1187    0.2927    0.2909
Pt    0.1183    0.2908    0.3328
Pt    0.1646    0.2475    0.2907
Pt    0.1201    0.3330    0.2920
Pt    0.1192    0.3342    0.3309
Pt    0.1402    0.4354    0.3315
Pt    0.1218    0.3728    0.2910
Pt    0.1191    0.3757    0.3346
Pt    0.1412    0.4376    0.2878
Pt    0.1191    0.4178    0.2901
Pt    0.1218    0.4157    0.3300
Pt    0.1424    0.2691    0.2485
Pt    0.1161    0.4590    0.2876
Pt    0.1186    0.4573    0.3305
Pt    0.0989    0.2492    0.3135
Pt    0.0197    0.4508    0.2495
Pt    0.0379    0.2492    0.2507
Pt    0.1628    0.2897    0.2891
Pt    0.1617    0.2937    0.3323
Pt    0.9970    0.2663    0.3526
Pt    0.1604    0.3326    0.2887
Pt    0.1590    0.3306    0.3331
Pt    0.1412    0.3955    0.3312
Pt    0.1621    0.3748    0.2869
Pt    0.1614    0.3746    0.3314
Pt    0.1411    0.3941    0.2886
Pt    0.1599    0.4168    0.2851
Pt    0.1634    0.4152    0.3302
Pt    0.0182    0.2472    0.3111
Pt    0.1607    0.4553    0.2881
Pt    0.1613    0.4569    0.3305
Pt    0.2444    0.3719    0.3698
Pt    0.1785    0.4798    0.3309
Pt    0.1824    0.4774    0.2850
Pt    0.1434    0.2526    0.2725
Pt    0.2054    0.2894    0.2869
Pt    0.2028    0.2912    0.3307
Pt    0.1399    0.3549    0.3285
Pt    0.2051    0.3294    0.2873
Pt    0.2046    0.3324    0.3319
Pt    0.1419    0.3577    0.2884
Pt    0.2050    0.3740    0.2892
Pt    0.2015    0.3720    0.3292
Pt    0.1402    0.3127    0.3345
Pt    0.2053    0.4165    0.2894
Pt    0.2029    0.4147    0.3304
Pt    0.0374    0.2476    0.3316
Pt    0.2020    0.4569    0.2870
Pt    0.2037    0.4546    0.3301
Pt    0.1395    0.2501    0.3564
Pt    0.1840    0.4363    0.3292
Pt    0.1823    0.4358    0.2874
Pt    0.2448    0.3085    0.3091
Pt    0.0556    0.3591    0.2471
Pt    0.0597    0.2472    0.3119
Pt    0.1414    0.3090    0.2911
Pt    0.1363    0.3132    0.2508
Pt    0.0589    0.2732    0.2505
Pt    0.1402    0.2715    0.3311
Pt    0.0992    0.2503    0.2670
Pt    0.0126    0.3532    0.2469
Pt    0.1386    0.2726    0.2914
Pt    0.2044    0.2481    0.2915
Pt    0.0783    0.2937    0.2487
Pt    0.0558    0.3149    0.2523
Pt    0.0786    0.2518    0.2882
Pt    0.0603    0.2500    0.2682
Pt    0.0206    0.2484    0.3534
Pt    0.1823    0.3952    0.3320
Pt    0.1847    0.3954    0.2872
Pt    0.0984    0.4791    0.3289
Pt    0.0988    0.4805    0.2872
Pt    0.2255    0.3524    0.3305
Pt    0.0977    0.3574    0.2486
Pt    0.2254    0.3535    0.2869
Pt    0.0992    0.3134    0.2915
Pt    0.2246    0.3094    0.3324
Pt    0.0987    0.2716    0.3329
Pt    0.2242    0.3106    0.2880
Pt    0.0973    0.4364    0.3315
Pt    0.2247    0.2720    0.3305
Pt    0.2248    0.2689    0.2914
Pt    0.0369    0.2715    0.2699
Pt    0.0376    0.2690    0.3126
Pt    0.0363    0.2703    0.3502
Pt    0.0360    0.3115    0.2716
Pt    0.0364    0.3131    0.3116
Pt    0.0369    0.3087    0.3568
Pt    0.0349    0.3570    0.2692
Pt    0.0373    0.3524    0.3067
Pt    0.0345    0.3511    0.3541
Pt    0.0346    0.3995    0.3105
Pt    0.0373    0.3923    0.3528
Pt    0.0289    0.4251    0.3125
Pt    0.0370    0.4359    0.3515
Pt    0.0312    0.4494    0.2986
Pt    0.0795    0.2702    0.2670
Pt    0.0807    0.2684    0.3107
Pt    0.0790    0.2693    0.3556
Pt    0.0788    0.3119    0.2698
Pt    0.0791    0.3114    0.3134
Pt    0.0779    0.3155    0.3527
Pt    0.0782    0.3584    0.2661
Pt    0.0766    0.3564    0.3090
Pt    0.0807    0.3546    0.3533
Pt    0.0781    0.4016    0.2683
Pt    0.0743    0.3964    0.3116
Pt    0.0778    0.3939    0.3519
Pt    0.0802    0.4364    0.2657
Pt    0.0750    0.4415    0.3121
Pt    0.0767    0.4364    0.3511
Pt    0.0789    0.4815    0.3044
Pt    0.0768    0.4772    0.3519
Pt    0.1185    0.2702    0.2680
Pt    0.1187    0.2697    0.3099
Pt    0.1190    0.2680    0.3536
Pt    0.1186    0.3142    0.2707
Pt    0.1214    0.3110    0.3133
Pt    0.1193    0.3141    0.3527
Pt    0.1174    0.3561    0.2663
Pt    0.1192    0.3523    0.3116
Pt    0.1204    0.3523    0.3522
Pt    0.1170    0.3948    0.2710
Pt    0.1224    0.3967    0.3089
Pt    0.1210    0.3934    0.3547
Pt    0.1198    0.4380    0.2691
Pt    0.1191    0.4371    0.3113
Pt    0.1178    0.4370    0.3523
Pt    0.1189    0.4795    0.2683
Pt    0.1173    0.4806    0.3090
Pt    0.1179    0.4795    0.3504
Pt    0.1669    0.2695    0.2694
Pt    0.1645    0.2694    0.3094
Pt    0.1622    0.2693    0.3525
Pt    0.1575    0.3094    0.2681
Pt    0.1635    0.3146    0.3090
Pt    0.1636    0.3134    0.3525
Pt    0.1613    0.3528    0.2665
Pt    0.1611    0.3526    0.3086
Pt    0.1642    0.3528    0.3515
Pt    0.1611    0.3958    0.2663
Pt    0.1653    0.3929    0.3110
Pt    0.1601    0.3924    0.3508
Pt    0.1623    0.4381    0.2650
Pt    0.1612    0.4364    0.3095
Pt    0.1615    0.4362    0.3513
Pt    0.1593    0.4770    0.2672
Pt    0.1582    0.4783    0.3111
Pt    0.1606    0.4790    0.3518
Pt    0.2036    0.2674    0.2678
Pt    0.2033    0.2696    0.3113
Pt    0.2034    0.2714    0.3491
Pt    0.2049    0.3116    0.2674
Pt    0.2031    0.3111    0.3128
Pt    0.2040    0.3122    0.3509
Pt    0.2043    0.3520    0.2667
Pt    0.2041    0.3525    0.3103
Pt    0.2055    0.3518    0.3497
Pt    0.2039    0.3954    0.2656
Pt    0.2025    0.3945    0.3100
Pt    0.2029    0.3921    0.3503
Pt    0.2055    0.4348    0.2638
Pt    0.2029    0.4365    0.3088
Pt    0.2049    0.4380    0.3533
Pt    0.2032    0.4772    0.2659
Pt    0.2035    0.4744    0.3059
Pt    0.2008    0.4769    0.3511
Pt    0.2233    0.2679    0.3709
Pt    0.1246    0.2478    0.2495
Pt    0.0086    0.4953    0.2468
Pt    0.0991    0.2509    0.3554
Pt    0.1012    0.2696    0.2901
Pt    0.1594    0.2516    0.3330
Pt    0.1636    0.4155    0.2467
Pt    0.2441    0.4546    0.2863
Pt    0.0995    0.3148    0.3309
Pt    0.0588    0.4740    0.3298
Pt    0.2419    0.2469    0.3697
Pt    0.2450    0.3291    0.2859
Pt    0.0550    0.4403    0.3293
Pt    0.9970    0.2684    0.2734
Pt    0.1430    0.2484    0.3085
Pt    0.0535    0.4357    0.2929
Pt    0.0772    0.3335    0.2495
Pt    0.0539    0.3943    0.3304
Pt    0.0163    0.2895    0.2725
Pt    0.0151    0.2893    0.3141
Pt    0.0162    0.2884    0.3530
Pt    0.0139    0.3332    0.2710
Pt    0.0181    0.3342    0.3113
Pt    0.0161    0.3266    0.3565
Pt    0.0174    0.3750    0.3118
Pt    0.0161    0.3703    0.3542
Pt    0.0103    0.4184    0.3519
Pt    0.0137    0.4481    0.2750
Pt    0.9985    0.2488    0.2492
Pt    0.0586    0.2928    0.2703
Pt    0.0587    0.2910    0.3104
Pt    0.0569    0.2914    0.3524
Pt    0.0568    0.3388    0.2670
Pt    0.0592    0.3335    0.3097
Pt    0.0559    0.3310    0.3519
Pt    0.0527    0.3799    0.2666
Pt    0.0538    0.3728    0.3135
Pt    0.0576    0.3726    0.3523
Pt    0.0570    0.4181    0.2685
Pt    0.0554    0.4171    0.3112
Pt    0.0586    0.4141    0.3560
Pt    0.0589    0.4539    0.2713
Pt    0.0567    0.4621    0.3050
Pt    0.0567    0.4578    0.3505
Pt    0.0990    0.2916    0.2700
Pt    0.0963    0.2911    0.3120
Pt    0.0986    0.2949    0.3565
Pt    0.0972    0.3347    0.2694
Pt    0.0966    0.3353    0.3093
Pt    0.0991    0.3324    0.3543
Pt    0.0957    0.3803    0.2690
Pt    0.0992    0.3745    0.3099
Pt    0.1001    0.3733    0.3553
Pt    0.1008    0.4184    0.2677
Pt    0.1002    0.4137    0.3122
Pt    0.0983    0.4149    0.3540
Pt    0.0982    0.4587    0.2666
Pt    0.0990    0.4593    0.3086
Pt    0.0989    0.4595    0.3532
Pt    0.2436    0.4747    0.3085
Pt    0.1396    0.2909    0.2706
Pt    0.1393    0.2900    0.3127
Pt    0.1417    0.2885    0.3522
Pt    0.1386    0.3362    0.2669
Pt    0.1404    0.3297    0.3095
Pt    0.1411    0.3297    0.3546
Pt    0.1417    0.3742    0.2663
Pt    0.1428    0.3763    0.3100
Pt    0.1421    0.3702    0.3524
Pt    0.1401    0.4159    0.2668
Pt    0.1418    0.4157    0.3082
Pt    0.1432    0.4169    0.3525
Pt    0.1390    0.4566    0.2666
Pt    0.1377    0.4575    0.3108
Pt    0.1387    0.4540    0.3518
Pt    0.0522    0.3967    0.2904
Pt    0.1802    0.3520    0.3287
Pt    0.1820    0.3523    0.2885
Pt    0.1834    0.2925    0.2692
Pt    0.1828    0.2892    0.3098
Pt    0.1806    0.2888    0.3520
Pt    0.1822    0.3326    0.2705
Pt    0.1857    0.3320    0.3081
Pt    0.1832    0.3327    0.3525
Pt    0.1860    0.3747    0.2686
Pt    0.1813    0.3711    0.3085
Pt    0.1828    0.3727    0.3512
Pt    0.1833    0.4174    0.2673
Pt    0.1840    0.4160    0.3093
Pt    0.1827    0.4163    0.3500
Pt    0.1841    0.4563    0.2651
Pt    0.1821    0.4571    0.3087
Pt    0.1817    0.4567    0.3518
Pt    0.0963    0.4362    0.2908
Pt    0.1828    0.3109    0.3304
Pt    0.1823    0.3108    0.2892
Pt    0.2251    0.2895    0.2657
Pt    0.2221    0.2917    0.3098
Pt    0.2229    0.2908    0.3527
Pt    0.2242    0.3349    0.2668
Pt    0.2227    0.3329    0.3085
Pt    0.2266    0.3307    0.3502
Pt    0.2260    0.3744    0.2669
Pt    0.2241    0.3760    0.3106
Pt    0.2253    0.3725    0.3494
Pt    0.2261    0.4121    0.2660
Pt    0.2236    0.4129    0.3116
Pt    0.2235    0.4132    0.3516
Pt    0.2228    0.4564    0.2660
Pt    0.2244    0.4512    0.3045
Pt    0.2236    0.4568    0.3511
Pt    0.0956    0.3567    0.2867
Pt    0.1810    0.2690    0.3309
Pt    0.1845    0.2685    0.2884
Pt    0.0168    0.2702    0.2939
Pt    0.0166    0.2658    0.3327
Pt    0.0138    0.3107    0.2904
Pt    0.0141    0.3095    0.3328
Pt    0.0346    0.4632    0.2758
Pt    0.0139    0.3528    0.2913
Pt    0.0157    0.3502    0.3326
Pt    0.0974    0.3933    0.3300
Pt    0.0144    0.3926    0.3339
Pt    0.0527    0.3529    0.3313
Pt    0.0582    0.3607    0.2867
Pt    0.2460    0.3931    0.3517
Pt    0.0582    0.2707    0.2876
Pt    0.0611    0.2725    0.3315
Pt    0.0980    0.3977    0.2913
Pt    0.0578    0.3120    0.2909
Pt    0.0568    0.3127    0.3322
Pt    0.1001    0.3555    0.3326
Pt    0.1809    0.4960    0.3089
Pt    0.2226    0.2481    0.3475
Pt    0.0993    0.2737    0.2482
Pt    0.1999    0.2468    0.3312
Pt    0.0331    0.3324    0.2522
Pt    0.2460    0.4750    0.3481
Pt    0.2229    0.4946    0.3503
Pt    0.2453    0.3722    0.2886
Pt    0.1194    0.2524    0.3315
Pt    0.0167    0.3098    0.2500
Pt    0.2440    0.2912    0.2873
Pt    0.2257    0.2666    0.2480
Pt    0.0097    0.4739    0.2686
Pt    0.2446    0.2871    0.3710
Pt    0.0393    0.2512    0.2905
Pt    0.1807    0.3115    0.2488
Pt    0.9967    0.2892    0.2499
Pt    0.2442    0.2664    0.3097
Pt    0.0190    0.2695    0.2502
Pt    0.2442    0.4551    0.3313
Pt    0.0789    0.2499    0.3339
Pt    0.0988    0.3139    0.2473
Pt    0.2248    0.2489    0.2702
Pt    0.1842    0.3948    0.3706
Pt    0.1191    0.2939    0.2490
Pt    0.2444    0.3269    0.3288
Pt    0.1999    0.2498    0.3703
Pt    0.0320    0.4133    0.3688
Pt    0.1214    0.4591    0.2468
Pt    0.2442    0.4313    0.3098
Pt    0.2455    0.4344    0.3518
Pt    0.0274    0.4771    0.2494
Pt    0.0569    0.4387    0.3712
Pt    0.2239    0.4946    0.3080
Pt    0.2027    0.4955    0.3283
Pt    0.2455    0.4952    0.3304
Pt    0.0356    0.4599    0.3707
Pt    0.1642    0.4146    0.3701
Pt    0.2261    0.4750    0.3710
Pt    0.1194    0.2898    0.3716
Pt    0.0999    0.3970    0.2473
Pt    0.1368    0.4816    0.2485
Pt    0.2461    0.3105    0.2662
Pt    0.2457    0.4149    0.3312
Pt    0.2452    0.4951    0.3716
Pt    0.2459    0.3923    0.3085
Pt    0.2455    0.3073    0.3496
Pt    0.2025    0.4574    0.3715
Pt    0.1831    0.4362    0.3705
Pt    0.0770    0.3802    0.2467
Pt    0.2455    0.2657    0.3947
Pt    0.2221    0.4776    0.4575
Pt    0.2233    0.4755    0.4125
Pt    0.2008    0.2885    0.3719
Pt    0.0158    0.3940    0.3717
Pt    0.1826    0.2510    0.4344
Pt    0.2255    0.4349    0.4569
Pt    0.2230    0.4353    0.4173
Pt    0.1365    0.3529    0.4591
Pt    0.2237    0.3922    0.4594
Pt    0.2261    0.3931    0.4168
Pt    0.0376    0.2891    0.4148
Pt    0.0323    0.2697    0.4360
Pt    0.0376    0.3321    0.4110
Pt    0.0359    0.3285    0.4556
Pt    0.0371    0.3753    0.4173
Pt    0.0345    0.3737    0.4552
Pt    0.0364    0.4153    0.4141
Pt    0.0358    0.4134    0.4584
Pt    0.1419    0.3526    0.4168
Pt    0.0377    0.4579    0.4137
Pt    0.0355    0.4574    0.4562
Pt    0.1406    0.3099    0.4569
Pt    0.2242    0.2681    0.4147
Pt    0.1414    0.3109    0.4166
Pt    0.1620    0.2489    0.4561
Pt    0.0749    0.2913    0.4158
Pt    0.0789    0.2876    0.4586
Pt    0.0797    0.3323    0.4155
Pt    0.0797    0.3296    0.4580
Pt    0.0762    0.3722    0.4164
Pt    0.0771    0.3727    0.4565
Pt    0.1819    0.3089    0.3723
Pt    0.0763    0.4151    0.4128
Pt    0.0775    0.4150    0.4607
Pt    0.1018    0.3934    0.3756
Pt    0.0790    0.4559    0.4144
Pt    0.0790    0.4548    0.4530
Pt    0.1392    0.2688    0.4584
Pt    0.1869    0.4789    0.4546
Pt    0.1844    0.4777    0.4151
Pt    0.9980    0.2622    0.4714
Pt    0.1199    0.2910    0.4172
Pt    0.1184    0.2924    0.4597
Pt    0.1208    0.3303    0.4153
Pt    0.1183    0.3314    0.4570
Pt    0.1172    0.2486    0.3755
Pt    0.1196    0.3727    0.4168
Pt    0.1188    0.3762    0.4570
Pt    0.1374    0.2690    0.4140
Pt    0.1215    0.4138    0.4132
Pt    0.1215    0.4161    0.4598
Pt    0.0989    0.4785    0.4574
Pt    0.1188    0.4524    0.4123
Pt    0.1214    0.4581    0.4552
Pt    0.1011    0.4763    0.4145
Pt    0.0989    0.4344    0.4590
Pt    0.1839    0.4363    0.4595
Pt    0.1417    0.4345    0.3724
Pt    0.1597    0.2855    0.4135
Pt    0.1597    0.2896    0.4562
Pt    0.0987    0.4345    0.4134
Pt    0.1648    0.3302    0.4162
Pt    0.1571    0.3298    0.4589
Pt    0.0975    0.3939    0.4595
Pt    0.1634    0.3735    0.4146
Pt    0.1586    0.3714    0.4572
Pt    0.0985    0.3950    0.4158
Pt    0.1629    0.4158    0.4160
Pt    0.1631    0.4177    0.4564
Pt    0.2040    0.2477    0.4943
Pt    0.1624    0.4553    0.4161
Pt    0.1627    0.4572    0.4582
Pt    0.0969    0.3514    0.4606
Pt    0.1839    0.4363    0.4192
Pt    0.1008    0.3545    0.4148
Pt    0.2261    0.4957    0.3929
Pt    0.2039    0.2875    0.4144
Pt    0.2026    0.2878    0.4552
Pt    0.1010    0.3123    0.4566
Pt    0.2032    0.3299    0.4168
Pt    0.2046    0.3279    0.4541
Pt    0.0970    0.3085    0.4166
Pt    0.2036    0.3752    0.4169
Pt    0.2039    0.3731    0.4589
Pt    0.0973    0.2687    0.4570
Pt    0.2048    0.4124    0.4170
Pt    0.2040    0.4157    0.4570
Pt    0.0958    0.2657    0.4167
Pt    0.2034    0.4549    0.4147
Pt    0.2021    0.4581    0.4553
Pt    0.0598    0.4753    0.4548
Pt    0.1809    0.3927    0.4582
Pt    0.1838    0.3934    0.4178
Pt    0.2441    0.3921    0.4788
Pt    0.2439    0.2669    0.4735
Pt    0.0807    0.3752    0.3751
Pt    0.0602    0.4779    0.4141
Pt    0.1194    0.2476    0.4582
Pt    0.0366    0.3732    0.3732
Pt    0.0573    0.4381    0.4525
Pt    0.0960    0.3118    0.3761
Pt    0.1393    0.3111    0.3750
Pt    0.0579    0.4372    0.4130
Pt    0.2453    0.3101    0.4762
Pt    0.0181    0.2529    0.4843
Pt    0.1390    0.2481    0.4796
Pt    0.1597    0.2485    0.3754
Pt    0.2461    0.3082    0.4341
Pt    0.0574    0.3920    0.4545
Pt    0.0571    0.3939    0.4150
Pt    0.1821    0.3536    0.4562
Pt    0.1802    0.4754    0.3748
Pt    0.0567    0.3537    0.4562
Pt    0.2235    0.3477    0.4574
Pt    0.2234    0.3519    0.4147
Pt    0.0566    0.3520    0.4167
Pt    0.2434    0.3908    0.3916
Pt    0.2245    0.3085    0.4533
Pt    0.2252    0.3088    0.4155
Pt    0.0570    0.3110    0.4557
Pt    0.1002    0.4795    0.3733
Pt    0.2257    0.2653    0.4554
Pt    0.0144    0.4951    0.4321
Pt    0.2259    0.4315    0.3735
Pt    0.0373    0.3091    0.3912
Pt    0.0371    0.3129    0.4343
Pt    0.0372    0.3534    0.3924
Pt    0.0370    0.3506    0.4365
Pt    0.0364    0.3954    0.3920
Pt    0.0324    0.3932    0.4364
Pt    0.0360    0.3938    0.4751
Pt    0.0370    0.4369    0.3911
Pt    0.0350    0.4343    0.4343
Pt    0.0359    0.4345    0.4757
Pt    0.0401    0.4769    0.3924
Pt    0.0371    0.4767    0.4350
Pt    0.0359    0.4775    0.4765
Pt    0.0762    0.2679    0.3969
Pt    0.0759    0.2685    0.4369
Pt    0.0776    0.3105    0.3960
Pt    0.0774    0.3101    0.4367
Pt    0.0746    0.3082    0.4769
Pt    0.0804    0.3531    0.3946
Pt    0.0795    0.3511    0.4378
Pt    0.0762    0.3521    0.4770
Pt    0.0776    0.3958    0.3931
Pt    0.0797    0.3963    0.4370
Pt    0.0759    0.3900    0.4776
Pt    0.0802    0.4371    0.3938
Pt    0.0809    0.4341    0.4338
Pt    0.0795    0.4380    0.4803
Pt    0.0801    0.4797    0.3958
Pt    0.0797    0.4773    0.4339
Pt    0.0774    0.4769    0.4753
Pt    0.1172    0.2678    0.3962
Pt    0.1168    0.2675    0.4352
Pt    0.1173    0.2706    0.4781
Pt    0.1161    0.3075    0.3935
Pt    0.1214    0.3098    0.4356
Pt    0.1150    0.3107    0.4817
Pt    0.1213    0.3513    0.3966
Pt    0.1199    0.3527    0.4356
Pt    0.1190    0.3520    0.4789
Pt    0.1235    0.3929    0.3951
Pt    0.1212    0.3954    0.4348
Pt    0.1212    0.3936    0.4805
Pt    0.1194    0.4319    0.3939
Pt    0.1201    0.4345    0.4333
Pt    0.1198    0.4350    0.4765
Pt    0.1193    0.4766    0.3939
Pt    0.1224    0.4760    0.4336
Pt    0.1202    0.4759    0.4768
Pt    0.1568    0.2676    0.3948
Pt    0.1599    0.2679    0.4387
Pt    0.1593    0.2672    0.4797
Pt    0.1598    0.3099    0.3952
Pt    0.1612    0.3100    0.4370
Pt    0.1590    0.3091    0.4774
Pt    0.1638    0.3517    0.3944
Pt    0.1607    0.3499    0.4380
Pt    0.1603    0.3505    0.4787
Pt    0.1651    0.3929    0.3915
Pt    0.1624    0.3947    0.4380
Pt    0.1623    0.3911    0.4762
Pt    0.1628    0.4348    0.3941
Pt    0.1628    0.4373    0.4374
Pt    0.1606    0.4340    0.4775
Pt    0.1584    0.4781    0.3941
Pt    0.1602    0.4761    0.4368
Pt    0.1619    0.4767    0.4778
Pt    0.2025    0.2670    0.3940
Pt    0.2060    0.2681    0.4359
Pt    0.2044    0.2675    0.4740
Pt    0.2010    0.3076    0.3969
Pt    0.2019    0.3071    0.4338
Pt    0.2027    0.3089    0.4759
Pt    0.2025    0.3499    0.3955
Pt    0.2036    0.3514    0.4374
Pt    0.2061    0.3476    0.4766
Pt    0.2043    0.3937    0.3937
Pt    0.2014    0.3937    0.4391
Pt    0.2017    0.3949    0.4787
Pt    0.2031    0.4352    0.3944
Pt    0.2045    0.4357    0.4374
Pt    0.2028    0.4356    0.4790
Pt    0.2029    0.4777    0.3902
Pt    0.2040    0.4767    0.4355
Pt    0.2052    0.4786    0.4779
Pt    0.2034    0.3316    0.3742
Pt    0.2459    0.2872    0.4137
Pt    0.1579    0.2470    0.4161
Pt    0.1384    0.2476    0.3961
Pt    0.1819    0.2482    0.4769
Pt    0.2441    0.4303    0.3954
Pt    0.0983    0.2706    0.3753
Pt    0.2437    0.4750    0.4771
Pt    0.0548    0.2699    0.3730
Pt    0.0572    0.3928    0.3752
Pt    0.2456    0.4551    0.4566
Pt    0.2461    0.2869    0.4523
Pt    0.0325    0.2860    0.3778
Pt    0.1786    0.2701    0.3755
Pt    0.0128    0.3499    0.3720
Pt    0.2439    0.3712    0.4141
Pt    0.0788    0.4570    0.3727
Pt    0.0966    0.2471    0.3944
Pt    0.0348    0.2924    0.4514
Pt    0.0152    0.3333    0.3944
Pt    0.0158    0.3740    0.3937
Pt    0.0143    0.3692    0.4391
Pt    0.0147    0.4155    0.3912
Pt    0.0145    0.4153    0.4351
Pt    0.0159    0.4136    0.4772
Pt    0.0162    0.4559    0.3920
Pt    0.0162    0.4555    0.4354
Pt    0.0161    0.4522    0.4766
Pt    0.2450    0.3505    0.3920
Pt    0.1829    0.3520    0.4178
Pt    0.0564    0.3111    0.4142
Pt    0.0568    0.2900    0.3949
Pt    0.0579    0.2907    0.4359
Pt    0.0590    0.3318    0.3945
Pt    0.0583    0.3325    0.4361
Pt    0.0566    0.3329    0.4727
Pt    0.0559    0.3739    0.3952
Pt    0.0570    0.3725    0.4354
Pt    0.0554    0.3710    0.4785
Pt    0.0560    0.4173    0.3889
Pt    0.0563    0.4151    0.4356
Pt    0.0571    0.4147    0.4764
Pt    0.0577    0.4554    0.3922
Pt    0.0588    0.4575    0.4335
Pt    0.0562    0.4542    0.4756
Pt    0.1221    0.3719    0.3754
Pt    0.1820    0.3090    0.4557
Pt    0.1800    0.3052    0.4170
Pt    0.0969    0.2856    0.4001
Pt    0.0968    0.2870    0.4353
Pt    0.0960    0.2890    0.4787
Pt    0.1007    0.3331    0.3961
Pt    0.1001    0.3331    0.4363
Pt    0.0939    0.3270    0.4823
Pt    0.0997    0.3741    0.3949
Pt    0.0993    0.3718    0.4361
Pt    0.1006    0.3750    0.4794
Pt    0.0995    0.4129    0.3949
Pt    0.1015    0.4156    0.4394
Pt    0.1010    0.4150    0.4796
Pt    0.1004    0.4589    0.3928
Pt    0.1029    0.4575    0.4356
Pt    0.0977    0.4566    0.4747
Pt    0.0531    0.2893    0.4744
Pt    0.1861    0.2675    0.4561
Pt    0.1802    0.2670    0.4121
Pt    0.1389    0.2899    0.3934
Pt    0.1402    0.2880    0.4355
Pt    0.1407    0.2880    0.4767
Pt    0.1420    0.3320    0.3960
Pt    0.1421    0.3313    0.4359
Pt    0.1388    0.3289    0.4786
Pt    0.1414    0.3725    0.3961
Pt    0.1401    0.3732    0.4372
Pt    0.1399    0.3727    0.4776
Pt    0.1436    0.4120    0.3909
Pt    0.1419    0.4140    0.4354
Pt    0.1436    0.4126    0.4779
Pt    0.1418    0.4540    0.3949
Pt    0.1403    0.4539    0.4322
Pt    0.1413    0.4563    0.4795
Pt    0.0565    0.2711    0.4162
Pt    0.1423    0.4766    0.4576
Pt    0.1406    0.4758    0.4146
Pt    0.1800    0.2884    0.3926
Pt    0.1803    0.2871    0.4370
Pt    0.1836    0.2877    0.4776
Pt    0.1822    0.3297    0.3922
Pt    0.1826    0.3307    0.4380
Pt    0.1814    0.3291    0.4746
Pt    0.1816    0.3715    0.3955
Pt    0.1810    0.3730    0.4384
Pt    0.1827    0.3709    0.4780
Pt    0.1833    0.4146    0.3926
Pt    0.1837    0.4154    0.4374
Pt    0.1822    0.4161    0.4781
Pt    0.1814    0.4567    0.3949
Pt    0.1834    0.4593    0.4358
Pt    0.1807    0.4548    0.4796
Pt    0.0151    0.4765    0.4556
Pt    0.1400    0.4377    0.4538
Pt    0.1421    0.4317    0.4130
Pt    0.2264    0.2863    0.3931
Pt    0.2237    0.2885    0.4353
Pt    0.2247    0.2886    0.4726
Pt    0.2236    0.3325    0.3946
Pt    0.2247    0.3291    0.4349
Pt    0.2278    0.3302    0.4777
Pt    0.2222    0.3715    0.3949
Pt    0.2223    0.3703    0.4360
Pt    0.2226    0.3707    0.4771
Pt    0.2243    0.4108    0.3954
Pt    0.2233    0.4135    0.4368
Pt    0.2236    0.4153    0.4772
Pt    0.2251    0.4535    0.3922
Pt    0.2233    0.4570    0.4343
Pt    0.2221    0.4561    0.4748
Pt    0.0154    0.4729    0.4138
Pt    0.1400    0.3918    0.4584
Pt    0.1440    0.3938    0.4149
Pt    0.0277    0.2679    0.4663
Pt    0.2449    0.4742    0.3944
Pt    0.0174    0.3525    0.4144
Pt    0.0156    0.3938    0.4148
Pt    0.0131    0.3939    0.4567
Pt    0.2441    0.3720    0.4574
Pt    0.0152    0.4365    0.4136
Pt    0.0159    0.4338    0.4552
Pt    0.1212    0.3312    0.3759
Pt    0.2232    0.2477    0.3925
Pt    0.0552    0.2684    0.4535
Pt    0.0134    0.3090    0.3768
Pt    0.1597    0.2917    0.3729
Pt    0.2458    0.3293    0.4152
Pt    0.2425    0.3491    0.4370
Pt    0.1594    0.4553    0.3723
Pt    0.0770    0.2898    0.3758
Pt    0.2435    0.4111    0.4537
Pt    0.0787    0.4148    0.3741
Pt    0.0396    0.3299    0.3753
Pt    0.0978    0.3511    0.4953
Pt    0.2458    0.3892    0.4352
Pt    0.0778    0.2491    0.3753
Pt    0.2418    0.3071    0.3909
Pt    0.2425    0.2468    0.4964
Pt    0.0387    0.4948    0.4141
Pt    0.1624    0.4964    0.4171
Pt    0.1392    0.4774    0.3722
Pt    0.0589    0.3543    0.3753
Pt    0.1388    0.2693    0.3733
Pt    0.2239    0.3494    0.3744
Pt    0.2196    0.3088    0.3749
Pt    0.1216    0.4963    0.4535
Pt    0.1420    0.3921    0.3726
Pt    0.0590    0.3105    0.3729
Pt    0.0155    0.4943    0.3940
Pt    0.1022    0.3514    0.3732
Pt    0.0795    0.3333    0.3734
Pt    0.1850    0.3522    0.3733
Pt    0.0616    0.4762    0.3765
Pt    0.1207    0.4572    0.3725
Pt    0.1412    0.3523    0.3732
Pt    0.0181    0.4375    0.3730
Pt    0.1620    0.3342    0.3733
Pt    0.2450    0.4341    0.4354
Pt    0.2453    0.4365    0.4773
Pt    0.2047    0.4139    0.3730
Pt    0.0999    0.4350    0.3745
Pt    0.1622    0.3723    0.3747
Pt    0.2427    0.3281    0.3718
Pt    0.2425    0.4547    0.4137
Pt    0.0588    0.4341    0.4957
Pt    0.1851    0.3484    0.4946
Pt    0.0561    0.3942    0.4959
Pt    0.1399    0.4321    0.4962
Pt    0.2460    0.4161    0.4956
Pt    0.2048    0.3295    0.4958
Pt    0.1802    0.3106    0.4957
Pt    0.0363    0.4138    0.4952
Pt    0.2255    0.3936    0.3720
Pt    0.2442    0.2467    0.4171
Pt    0.0547    0.4778    0.4964
Pt    0.2045    0.3734    0.3716
Pt    0.1218    0.4155    0.3717
Pt    0.1828    0.2478    0.6005
Pt    0.2227    0.4763    0.5833
Pt    0.9973    0.3892    0.5186
Pt    0.1624    0.3322    0.5000
Pt    0.2263    0.4756    0.5383
Pt    0.2239    0.4336    0.5799
Pt    0.1194    0.3321    0.5003
Pt    0.0425    0.3813    0.5802
Pt    0.0350    0.4124    0.5402
Pt    0.0423    0.4141    0.5794
Pt    0.0394    0.4540    0.5390
Pt    0.0402    0.4559    0.5829
Pt    0.9977    0.3720    0.5783
Pt    0.1400    0.2488    0.5172
Pt    0.0824    0.4525    0.5391
Pt    0.1173    0.3722    0.4998
Pt    0.9979    0.4958    0.5417
Pt    0.1218    0.4505    0.5399
Pt    0.9979    0.4161    0.5811
Pt    0.1383    0.2468    0.5997
Pt    0.1574    0.2891    0.5353
Pt    0.1634    0.2886    0.5790
Pt    0.1592    0.3309    0.5407
Pt    0.1605    0.3304    0.5804
Pt    0.1612    0.3714    0.5401
Pt    0.1617    0.3735    0.5818
Pt    0.1613    0.4113    0.5416
Pt    0.1599    0.4125    0.5809
Pt    0.1597    0.4580    0.5384
Pt    0.1613    0.4560    0.5816
Pt    0.0176    0.4337    0.4979
Pt    0.9974    0.4544    0.5394
Pt    0.2015    0.2907    0.5373
Pt    0.2028    0.2886    0.5786
Pt    0.2045    0.3283    0.5391
Pt    0.2034    0.3283    0.5844
Pt    0.2011    0.3736    0.5421
Pt    0.2040    0.3691    0.5804
Pt    0.2029    0.4124    0.5392
Pt    0.2016    0.4149    0.5807
Pt    0.2012    0.4537    0.5386
Pt    0.2023    0.4544    0.5811
Pt    0.1857    0.4800    0.4971
Pt    0.0764    0.2512    0.6206
Pt    0.2428    0.4540    0.4992
Pt    0.1413    0.3921    0.4994
Pt    0.2426    0.3703    0.5395
Pt    0.1206    0.2487    0.5766
Pt    0.2439    0.4321    0.5584
Pt    0.1607    0.4539    0.5000
Pt    0.2432    0.4745    0.5168
Pt    0.2213    0.2681    0.4985
Pt    0.9974    0.3514    0.5984
Pt    0.1607    0.4114    0.4988
Pt    0.2432    0.3735    0.4972
Pt    0.2457    0.4129    0.5400
Pt    0.2233    0.4337    0.4980
Pt    0.9971    0.4743    0.5610
Pt    0.2216    0.4355    0.5400
Pt    0.1415    0.2471    0.5566
Pt    0.2455    0.4555    0.5387
Pt    0.0170    0.3933    0.4975
Pt    0.9967    0.4137    0.5380
Pt    0.1203    0.4109    0.5020
Pt    0.2211    0.3925    0.5818
Pt    0.0011    0.3722    0.6199
Pt    0.2250    0.3925    0.5395
Pt    0.0386    0.3535    0.5988
Pt    0.0442    0.3974    0.6017
Pt    0.0385    0.4329    0.5165
Pt    0.0425    0.4356    0.5591
Pt    0.0349    0.4753    0.5179
Pt    0.0393    0.4740    0.5602
Pt    0.1012    0.3326    0.6009
Pt    0.0831    0.4351    0.5192
Pt    0.0800    0.4751    0.5209
Pt    0.0812    0.4729    0.5627
Pt    0.1215    0.2676    0.5964
Pt    0.1237    0.3086    0.6011
Pt    0.1214    0.4310    0.5201
Pt    0.1195    0.4329    0.5592
Pt    0.1210    0.4759    0.5157
Pt    0.1171    0.4753    0.5601
Pt    0.1610    0.2665    0.5193
Pt    0.1627    0.2669    0.5581
Pt    0.1610    0.2650    0.5991
Pt    0.1550    0.3129    0.5201
Pt    0.1609    0.3111    0.5589
Pt    0.1635    0.3060    0.6042
Pt    0.1589    0.3529    0.5202
Pt    0.1613    0.3511    0.5606
Pt    0.1621    0.3520    0.6018
Pt    0.1592    0.3892    0.5196
Pt    0.1620    0.3905    0.5613
Pt    0.1622    0.3931    0.6030
Pt    0.1618    0.4318    0.5194
Pt    0.1599    0.4332    0.5608
Pt    0.1606    0.4330    0.5984
Pt    0.1629    0.4768    0.5189
Pt    0.1582    0.4756    0.5613
Pt    0.1609    0.4766    0.6012
Pt    0.2029    0.2670    0.5190
Pt    0.2048    0.2628    0.5599
Pt    0.2007    0.2668    0.6009
Pt    0.2011    0.3090    0.5155
Pt    0.2022    0.3110    0.5615
Pt    0.2024    0.3073    0.6016
Pt    0.2018    0.3487    0.5181
Pt    0.2068    0.3501    0.5572
Pt    0.2029    0.3500    0.6013
Pt    0.2015    0.3920    0.5193
Pt    0.2033    0.3928    0.5619
Pt    0.2034    0.3930    0.6017
Pt    0.2011    0.4354    0.5170
Pt    0.2013    0.4345    0.5593
Pt    0.2020    0.4344    0.6019
Pt    0.2013    0.4778    0.5169
Pt    0.2018    0.4778    0.5615
Pt    0.2037    0.4756    0.6011
Pt    0.1394    0.3108    0.4995
Pt    0.9994    0.4323    0.5175
Pt    0.1578    0.4509    0.6199
Pt    0.2432    0.2718    0.5155
Pt    0.1612    0.3704    0.4995
Pt    0.1650    0.2476    0.5365
Pt    0.1385    0.4957    0.5620
Pt    0.2034    0.4134    0.4992
Pt    0.0787    0.4941    0.4970
Pt    0.9977    0.3953    0.6012
Pt    0.1210    0.3301    0.6205
Pt    0.0162    0.4952    0.6048
Pt    0.2248    0.3490    0.4975
Pt    0.2431    0.4343    0.5204
Pt    0.2445    0.3511    0.6018
Pt    0.2444    0.4566    0.5799
Pt    0.2455    0.2665    0.6009
Pt    0.0986    0.4965    0.5615
Pt    0.0182    0.3748    0.6000
Pt    0.0192    0.4112    0.5178
Pt    0.0191    0.4172    0.5623
Pt    0.0199    0.4100    0.6000
Pt    0.0185    0.4536    0.5174
Pt    0.0188    0.4531    0.5614
Pt    0.0123    0.4570    0.6015
Pt    0.2233    0.4772    0.4997
Pt    0.1574    0.2887    0.4996
Pt    0.2235    0.3514    0.5821
Pt    0.0768    0.3515    0.6036
Pt    0.0591    0.3727    0.6042
Pt    0.0579    0.4137    0.5181
Pt    0.0569    0.4537    0.5166
Pt    0.0625    0.4526    0.5643
Pt    0.2434    0.3488    0.5617
Pt    0.2445    0.3508    0.5166
Pt    0.2240    0.3527    0.5374
Pt    0.1034    0.2877    0.5984
Pt    0.0972    0.4121    0.5182
Pt    0.1015    0.4545    0.5180
Pt    0.1034    0.4535    0.5602
Pt    0.2046    0.4958    0.5807
Pt    0.0996    0.3110    0.6205
Pt    0.2039    0.4545    0.6213
Pt    0.1418    0.2850    0.5991
Pt    0.1376    0.3346    0.5192
Pt    0.1387    0.3302    0.5641
Pt    0.1403    0.3326    0.5997
Pt    0.1338    0.3705    0.5209
Pt    0.1398    0.3729    0.6026
Pt    0.1409    0.4123    0.5209
Pt    0.1384    0.4129    0.5594
Pt    0.1390    0.4121    0.5991
Pt    0.1402    0.4557    0.5178
Pt    0.1427    0.4542    0.5592
Pt    0.1384    0.4562    0.6017
Pt    0.1812    0.4739    0.6209
Pt    0.2456    0.3093    0.5993
Pt    0.0978    0.3914    0.5006
Pt    0.1792    0.2924    0.5183
Pt    0.1823    0.2891    0.5579
Pt    0.1834    0.2867    0.6026
Pt    0.1818    0.3281    0.5199
Pt    0.1835    0.3321    0.5592
Pt    0.1813    0.3311    0.6009
Pt    0.1825    0.3716    0.5189
Pt    0.1817    0.3704    0.5608
Pt    0.1838    0.3698    0.6025
Pt    0.1818    0.4143    0.5187
Pt    0.1810    0.4111    0.5617
Pt    0.1829    0.4119    0.6026
Pt    0.1822    0.4561    0.5201
Pt    0.1809    0.4567    0.5589
Pt    0.1824    0.4547    0.6016
Pt    0.1420    0.4764    0.4977
Pt    0.2009    0.3709    0.4971
Pt    0.1015    0.4329    0.4991
Pt    0.2233    0.2897    0.5179
Pt    0.2235    0.2864    0.5563
Pt    0.2217    0.2854    0.5999
Pt    0.2235    0.3291    0.5177
Pt    0.2239    0.3276    0.5631
Pt    0.2247    0.3299    0.6042
Pt    0.2232    0.3733    0.5190
Pt    0.2255    0.3726    0.5632
Pt    0.2261    0.3734    0.6033
Pt    0.2236    0.4135    0.5197
Pt    0.2237    0.4145    0.5604
Pt    0.2232    0.4137    0.6025
Pt    0.2213    0.4549    0.5190
Pt    0.2250    0.4551    0.5612
Pt    0.2252    0.4535    0.6013
Pt    0.1392    0.2697    0.4980
Pt    0.1801    0.4358    0.4982
Pt    0.2214    0.3912    0.4978
Pt    0.0140    0.3919    0.5398
Pt    0.0156    0.3938    0.5778
Pt    0.0190    0.4351    0.5402
Pt    0.0210    0.4332    0.5865
Pt    0.0178    0.4742    0.5416
Pt    0.0130    0.4776    0.5825
Pt    0.0602    0.4362    0.5371
Pt    0.0617    0.4737    0.5424
Pt    0.0590    0.4742    0.5806
Pt    0.1220    0.3538    0.5994
Pt    0.1208    0.4103    0.5382
Pt    0.1015    0.4732    0.5387
Pt    0.1006    0.4716    0.5829
Pt    0.1410    0.2700    0.5417
Pt    0.1394    0.2687    0.5756
Pt    0.1416    0.3097    0.5810
Pt    0.1388    0.3521    0.5431
Pt    0.1424    0.3539    0.5773
Pt    0.1404    0.3902    0.5413
Pt    0.1422    0.3911    0.5778
Pt    0.1431    0.4335    0.5385
Pt    0.1383    0.4350    0.5801
Pt    0.1387    0.4779    0.5383
Pt    0.1392    0.4721    0.5797
Pt    0.1830    0.2685    0.5381
Pt    0.1811    0.2653    0.5801
Pt    0.1820    0.3103    0.5393
Pt    0.1835    0.3083    0.5826
Pt    0.1821    0.3512    0.5393
Pt    0.1825    0.3486    0.5798
Pt    0.1814    0.3931    0.5402
Pt    0.1844    0.3908    0.5828
Pt    0.1803    0.4340    0.5403
Pt    0.1805    0.4364    0.5796
Pt    0.1800    0.4776    0.5412
Pt    0.1802    0.4764    0.5808
Pt    0.2255    0.2663    0.5373
Pt    0.2241    0.2650    0.5807
Pt    0.2265    0.3102    0.5390
Pt    0.2231    0.3063    0.5814
Pt    0.1006    0.4958    0.5153
Pt    0.2454    0.3103    0.5170
Pt    0.0578    0.4962    0.5616
Pt    0.2011    0.4569    0.4983
Pt    0.0999    0.2677    0.6172
Pt    0.1623    0.4963    0.5822
Pt    0.0993    0.4747    0.4973
Pt    0.0776    0.4567    0.4972
Pt    0.2451    0.3278    0.5808
Pt    0.1575    0.4186    0.6209
Pt    0.2425    0.3324    0.5375
Pt    0.0363    0.4921    0.5825
Pt    0.9968    0.4339    0.5616
Pt    0.2262    0.4942    0.5601
Pt    0.0806    0.2914    0.6186
Pt    0.1837    0.2690    0.5006
Pt    0.0564    0.4930    0.6043
Pt    0.2030    0.2881    0.4971
Pt    0.1177    0.4923    0.5841
Pt    0.0392    0.4950    0.5401
Pt    0.0748    0.3726    0.4999
Pt    0.2439    0.3932    0.5181
Pt    0.0368    0.3730    0.6209
Pt    0.1796    0.3924    0.4984
Pt    0.0818    0.4923    0.5827
Pt    0.2445    0.4118    0.5801
Pt    0.0793    0.4130    0.4970
Pt    0.0762    0.3311    0.6207
Pt    0.2433    0.4326    0.6047
Pt    0.1209    0.4533    0.4980
Pt    0.1398    0.3517    0.4982
Pt    0.2429    0.2869    0.6192
Pt    0.0552    0.3492    0.6207
Pt    0.2462    0.3939    0.6021
Pt    0.0999    0.4889    0.6066
Pt    0.1404    0.4961    0.6026
Pt    0.0003    0.3308    0.6179
Pt    0.0997    0.3520    0.6213
Pt    0.0828    0.3732    0.6213
Pt    0.9991    0.4745    0.5195
Pt    0.0179    0.3521    0.6210
Pt    0.2441    0.3923    0.5614
Pt    0.0765    0.4947    0.6214
Pt    0.1390    0.2665    0.6212
Pt    0.0151    0.4773    0.4969
Pt    0.1208    0.4964    0.4972
Pt    0.0376    0.4554    0.4974
Pt    0.2249    0.3081    0.4980
Pt    0.2210    0.3501    0.6215
Pt    0.2233    0.3919    0.6249
Pt    0.2271    0.4775    0.6221
Pt    0.1186    0.3746    0.6221
Pt    0.2219    0.2672    0.7064
Pt    0.2446    0.4325    0.6856
Pt    0.1613    0.4945    0.6241
Pt    0.2433    0.3940    0.6857
Pt    0.2237    0.2657    0.6621
Pt    0.9979    0.2486    0.6598
Pt    0.0579    0.2498    0.7229
Pt    0.2462    0.3498    0.6855
Pt    0.9974    0.2922    0.7045
Pt    0.2264    0.4753    0.7070
Pt    0.0345    0.2920    0.6615
Pt    0.0393    0.2920    0.7054
Pt    0.1603    0.3740    0.6244
Pt    0.0374    0.3339    0.6625
Pt    0.0380    0.3330    0.7017
Pt    0.1822    0.3941    0.6233
Pt    0.1189    0.2477    0.7445
Pt    0.0580    0.2513    0.6838
Pt    0.0166    0.2480    0.7234
Pt    0.1845    0.3937    0.6656
Pt    0.2432    0.3720    0.6670
Pt    0.0773    0.2913    0.6629
Pt    0.0773    0.2920    0.7051
Pt    0.1784    0.2511    0.6885
Pt    0.0984    0.2503    0.6869
Pt    0.0787    0.3301    0.6606
Pt    0.0731    0.3367    0.7031
Pt    0.1206    0.4935    0.6247
Pt    0.0173    0.2486    0.6830
Pt    0.0746    0.3782    0.6661
Pt    0.0770    0.3746    0.7038
Pt    0.0604    0.3985    0.6229
Pt    0.2234    0.4317    0.7090
Pt    0.1857    0.4750    0.7069
Pt    0.1224    0.2909    0.6629
Pt    0.1184    0.2923    0.7049
Pt    0.2452    0.4343    0.7289
Pt    0.1193    0.2489    0.6643
Pt    0.1170    0.3330    0.6641
Pt    0.1194    0.3345    0.7083
Pt    0.9989    0.2719    0.6380
Pt    0.2442    0.2477    0.7048
Pt    0.1192    0.3727    0.6667
Pt    0.1167    0.3753    0.7091
Pt    0.0349    0.4149    0.6229
Pt    0.9973    0.2736    0.6843
Pt    0.0382    0.2530    0.7041
Pt    0.2254    0.4342    0.6659
Pt    0.0963    0.3551    0.7064
Pt    0.1595    0.2878    0.6610
Pt    0.1619    0.2889    0.7054
Pt    0.2035    0.4127    0.6240
Pt    0.0972    0.3522    0.6626
Pt    0.1596    0.3309    0.6648
Pt    0.1604    0.3303    0.7027
Pt    0.1191    0.2481    0.7060
Pt    0.2213    0.4337    0.6227
Pt    0.1608    0.3708    0.6648
Pt    0.1618    0.3752    0.7069
Pt    0.1420    0.2679    0.6626
Pt    0.0981    0.3135    0.7060
Pt    0.1625    0.4151    0.6648
Pt    0.1628    0.4136    0.7067
Pt    0.0989    0.3104    0.6648
Pt    0.0971    0.2478    0.6416
Pt    0.1619    0.4563    0.6651
Pt    0.1622    0.4592    0.7068
Pt    0.9976    0.3762    0.6658
Pt    0.2443    0.4965    0.6648
Pt    0.2025    0.3698    0.6225
Pt    0.0178    0.3087    0.7442
Pt    0.2252    0.3089    0.7066
Pt    0.1814    0.3090    0.6231
Pt    0.2006    0.2884    0.6647
Pt    0.2024    0.2883    0.7064
Pt    0.1815    0.3536    0.7072
Pt    0.2029    0.2472    0.6646
Pt    0.2011    0.3326    0.6640
Pt    0.2031    0.3290    0.7058
Pt    0.1419    0.3101    0.6218
Pt    0.2024    0.3296    0.6233
Pt    0.2021    0.3697    0.6647
Pt    0.2050    0.3710    0.7075
Pt    0.9986    0.3557    0.6839
Pt    0.0980    0.2705    0.7434
Pt    0.2050    0.4146    0.6648
Pt    0.2027    0.4118    0.7057
Pt    0.2238    0.3063    0.6656
Pt    0.0961    0.3973    0.7450
Pt    0.2049    0.4539    0.6655
Pt    0.2057    0.4539    0.7078
Pt    0.0987    0.2710    0.7042
Pt    0.0988    0.2688    0.6610
Pt    0.2459    0.3925    0.7288
Pt    0.0972    0.3962    0.7047
Pt    0.1837    0.4732    0.6633
Pt    0.1791    0.3506    0.6644
Pt    0.0795    0.3921    0.6418
Pt    0.0543    0.2506    0.6380
Pt    0.0151    0.2476    0.6390
Pt    0.1841    0.3918    0.7088
Pt    0.2455    0.3510    0.7290
Pt    0.9996    0.3361    0.6645
Pt    0.1384    0.2696    0.7056
Pt    0.0184    0.3134    0.7043
Pt    0.2440    0.3306    0.6624
Pt    0.1400    0.3122    0.7048
Pt    0.2417    0.2673    0.7274
Pt    0.0587    0.3553    0.6616
Pt    0.1805    0.3527    0.6237
Pt    0.2447    0.4138    0.6643
Pt    0.1819    0.3098    0.7034
Pt    0.1789    0.3082    0.6644
Pt    0.2458    0.4133    0.7072
Pt    0.1379    0.2511    0.6856
Pt    0.1835    0.2669    0.6641
Pt    0.1393    0.3530    0.6640
Pt    0.1408    0.3100    0.6631
Pt    0.2442    0.3086    0.6418
Pt    0.0760    0.3334    0.7456
Pt    0.2198    0.4766    0.6659
Pt    0.0173    0.3112    0.6614
Pt    0.1405    0.3543    0.7082
Pt    0.0360    0.2502    0.6579
Pt    0.9999    0.3530    0.6406
Pt    0.2423    0.3506    0.6448
Pt    0.2434    0.3284    0.7062
Pt    0.2457    0.4768    0.7280
Pt    0.2455    0.3099    0.6842
Pt    0.0171    0.3574    0.6643
Pt    0.2235    0.3514    0.6650
Pt    0.0362    0.2685    0.6788
Pt    0.0384    0.2696    0.7256
Pt    0.0368    0.3103    0.6825
Pt    0.0376    0.3114    0.7252
Pt    0.0368    0.3527    0.6431
Pt    0.0414    0.3928    0.6415
Pt    0.0763    0.2711    0.6379
Pt    0.0765    0.2699    0.6794
Pt    0.0779    0.2711    0.7225
Pt    0.0751    0.3094    0.6378
Pt    0.0776    0.3103    0.6856
Pt    0.0775    0.3136    0.7265
Pt    0.0789    0.3499    0.6409
Pt    0.0761    0.3554    0.6825
Pt    0.0757    0.3530    0.7258
Pt    0.1003    0.3921    0.6635
Pt    0.1180    0.2668    0.6421
Pt    0.1174    0.2726    0.6834
Pt    0.1198    0.2684    0.7251
Pt    0.1215    0.3106    0.6434
Pt    0.1198    0.3127    0.6868
Pt    0.1212    0.3116    0.7277
Pt    0.1183    0.3537    0.6429
Pt    0.1190    0.3529    0.6893
Pt    0.1200    0.3541    0.7288
Pt    0.1230    0.3943    0.6852
Pt    0.1190    0.3975    0.7267
Pt    0.1601    0.2666    0.6421
Pt    0.1590    0.2699    0.6847
Pt    0.1608    0.2687    0.7256
Pt    0.1584    0.3109    0.6439
Pt    0.1604    0.3085    0.6835
Pt    0.1620    0.3111    0.7238
Pt    0.1586    0.3509    0.6426
Pt    0.1612    0.3541    0.6878
Pt    0.1616    0.3551    0.7271
Pt    0.1636    0.3954    0.6439
Pt    0.1632    0.3913    0.6840
Pt    0.1609    0.3953    0.7296
Pt    0.1618    0.4343    0.6446
Pt    0.1614    0.4347    0.6853
Pt    0.1613    0.4358    0.7278
Pt    0.1633    0.4726    0.6429
Pt    0.1632    0.4760    0.6838
Pt    0.1618    0.4757    0.7293
Pt    0.2034    0.2681    0.6431
Pt    0.2032    0.2674    0.6842
Pt    0.2023    0.2687    0.7286
Pt    0.2032    0.3081    0.6465
Pt    0.2022    0.3099    0.6842
Pt    0.2011    0.3088    0.7269
Pt    0.1995    0.3498    0.6425
Pt    0.2007    0.3513    0.6854
Pt    0.2041    0.3490    0.7268
Pt    0.2039    0.3908    0.6441
Pt    0.2028    0.3937    0.6871
Pt    0.2029    0.3974    0.7282
Pt    0.2057    0.4360    0.6462
Pt    0.2056    0.4324    0.6875
Pt    0.2063    0.4354    0.7286
Pt    0.2026    0.4723    0.6438
Pt    0.2021    0.4769    0.6832
Pt    0.2041    0.4786    0.7271
Pt    0.0576    0.3145    0.7046
Pt    0.1405    0.4746    0.6662
Pt    0.2247    0.3487    0.7055
Pt    0.2454    0.2877    0.7050
Pt    0.2452    0.3312    0.6239
Pt    0.0564    0.3102    0.6606
Pt    0.9989    0.3111    0.6424
Pt    0.1398    0.4949    0.6842
Pt    0.0580    0.2727    0.7049
Pt    0.1822    0.4351    0.7066
Pt    0.2448    0.2702    0.6425
Pt    0.0542    0.2721    0.6548
Pt    0.1829    0.4952    0.6436
Pt    0.0373    0.2476    0.7434
Pt    0.0172    0.2716    0.7057
Pt    0.2424    0.3700    0.6243
Pt    0.2453    0.3080    0.7270
Pt    0.0156    0.2699    0.6595
Pt    0.0187    0.2916    0.6870
Pt    0.0177    0.2907    0.7248
Pt    0.0148    0.3320    0.6423
Pt    0.0187    0.3331    0.6831
Pt    0.0156    0.3335    0.7246
Pt    0.0206    0.3761    0.6470
Pt    0.2241    0.3925    0.7083
Pt    0.0563    0.2894    0.6829
Pt    0.0597    0.2908    0.7271
Pt    0.0580    0.3321    0.6421
Pt    0.0580    0.3348    0.6789
Pt    0.0550    0.3331    0.7248
Pt    0.0591    0.3711    0.6386
Pt    0.0996    0.2898    0.6428
Pt    0.0986    0.2929    0.6849
Pt    0.0986    0.2934    0.7249
Pt    0.1000    0.3294    0.6410
Pt    0.0957    0.3324    0.6856
Pt    0.0979    0.3330    0.7275
Pt    0.0980    0.3713    0.6445
Pt    0.0970    0.3758    0.6841
Pt    0.0958    0.3779    0.7248
Pt    0.1185    0.3932    0.6445
Pt    0.2230    0.3923    0.6656
Pt    0.1401    0.2847    0.6415
Pt    0.1395    0.2903    0.6829
Pt    0.1412    0.2925    0.7249
Pt    0.1379    0.3316    0.6440
Pt    0.1391    0.3321    0.6827
Pt    0.1412    0.3330    0.7287
Pt    0.1399    0.3728    0.6437
Pt    0.1394    0.3723    0.6860
Pt    0.1413    0.3748    0.7265
Pt    0.1411    0.4156    0.6429
Pt    0.1390    0.4172    0.6866
Pt    0.1418    0.4166    0.7295
Pt    0.1418    0.4523    0.6442
Pt    0.1430    0.4553    0.7283
Pt    0.0184    0.3924    0.6235
Pt    0.0779    0.2486    0.6638
Pt    0.1428    0.4344    0.6654
Pt    0.1807    0.2883    0.6425
Pt    0.1803    0.2895    0.6857
Pt    0.1812    0.2880    0.7285
Pt    0.1795    0.3301    0.6444
Pt    0.1814    0.3309    0.6841
Pt    0.1826    0.3312    0.7269
Pt    0.1807    0.3737    0.6455
Pt    0.1822    0.3723    0.6849
Pt    0.1831    0.3755    0.7287
Pt    0.1846    0.4139    0.6445
Pt    0.1836    0.4159    0.6868
Pt    0.1830    0.4167    0.7283
Pt    0.1806    0.4525    0.6392
Pt    0.1843    0.4534    0.6864
Pt    0.1838    0.4552    0.7283
Pt    0.1591    0.2859    0.6223
Pt    0.0173    0.4930    0.7395
Pt    0.1852    0.4351    0.6648
Pt    0.2239    0.2882    0.6452
Pt    0.2233    0.2867    0.6849
Pt    0.2245    0.2882    0.7255
Pt    0.2221    0.3296    0.6440
Pt    0.2235    0.3307    0.6850
Pt    0.2228    0.3285    0.7264
Pt    0.2245    0.3708    0.6447
Pt    0.2238    0.3719    0.6873
Pt    0.2216    0.3708    0.7288
Pt    0.2253    0.4120    0.6464
Pt    0.2246    0.4123    0.6861
Pt    0.2250    0.4119    0.7316
Pt    0.2278    0.4561    0.6459
Pt    0.2230    0.4569    0.6863
Pt    0.2246    0.4551    0.7279
Pt    0.1426    0.3955    0.7092
Pt    0.1850    0.2698    0.7073
Pt    0.1424    0.3929    0.6661
Pt    0.1212    0.4952    0.6616
Pt    0.2227    0.4945    0.6441
Pt    0.0775    0.2482    0.7022
Pt    0.1589    0.4906    0.7063
Pt    0.1413    0.4733    0.6245
Pt    0.2447    0.3721    0.7084
Pt    0.0760    0.2477    0.7433
Pt    0.2444    0.2480    0.6236
Pt    0.0153    0.2672    0.7453
Pt    0.9991    0.2911    0.6614
Pt    0.1597    0.2488    0.7076
Pt    0.1621    0.2471    0.6625
Pt    0.2447    0.4327    0.6434
Pt    0.2457    0.4535    0.6678
Pt    0.2446    0.2667    0.6845
Pt    0.2224    0.2657    0.6226
Pt    0.1427    0.4937    0.6426
Pt    0.2444    0.3910    0.6438
Pt    0.0979    0.2477    0.7247
Pt    0.2432    0.2865    0.6643
Pt    0.1390    0.2479    0.6437
Pt    0.2445    0.4143    0.6244
Pt    0.1391    0.3533    0.6242
Pt    0.1633    0.4959    0.6638
Pt    0.1406    0.3931    0.6248
Pt    0.9990    0.4120    0.6251
Pt    0.1163    0.3752    0.7462
Pt    0.1827    0.2662    0.6232
Pt    0.0356    0.3330    0.7441
Pt    0.0561    0.3125    0.7457
Pt    0.2031    0.2889    0.6246
Pt    0.2030    0.4965    0.6221
Pt    0.1804    0.4946    0.7253
Pt    0.2459    0.4965    0.7463
Pt    0.0959    0.3543    0.7461
Pt    0.0361    0.2876    0.7454
Pt    0.1205    0.2892    0.7458
Pt    0.2039    0.3297    0.7464
Pt    0.0593    0.2696    0.7460
Pt    0.1824    0.3508    0.7463
Pt    0.2275    0.3093    0.6223
Pt    0.2456    0.4965    0.6232
Pt    0.1195    0.2883    0.6243
Pt    0.1835    0.4322    0.6230
Pt    0.1608    0.3317    0.6217
Pt    0.2285    0.4784    0.8343
Pt    0.2249    0.4758    0.7881
Pt    0.2241    0.4370    0.8339
Pt    0.2272    0.4366    0.7924
Pt    0.2229    0.3100    0.7472
Pt    0.2268    0.3955    0.8340
Pt    0.0374    0.2881    0.7879
Pt    0.0364    0.2900    0.8319
Pt    0.0374    0.3315    0.7876
Pt    0.0354    0.3335    0.8297
Pt    0.0349    0.3745    0.7893
Pt    0.0380    0.3711    0.8300
Pt    0.0361    0.4141    0.7891
Pt    0.0375    0.4173    0.8313
Pt    0.0174    0.4570    0.8083
Pt    0.0383    0.4595    0.8330
Pt    0.0783    0.2894    0.7897
Pt    0.0798    0.2893    0.8308
Pt    0.0774    0.3302    0.7887
Pt    0.0787    0.3306    0.8327
Pt    0.0778    0.3766    0.7902
Pt    0.0817    0.3728    0.8319
Pt    0.0779    0.4156    0.7901
Pt    0.0797    0.4174    0.8331
Pt    0.0764    0.4611    0.7936
Pt    0.0790    0.4599    0.8350
Pt    0.1243    0.2899    0.7901
Pt    0.1214    0.2885    0.8298
Pt    0.1173    0.3337    0.7882
Pt    0.1218    0.3308    0.8345
Pt    0.1184    0.3720    0.7894
Pt    0.1181    0.3734    0.8323
Pt    0.1197    0.4145    0.7916
Pt    0.1183    0.4178    0.8343
Pt    0.1188    0.4591    0.7910
Pt    0.1184    0.4607    0.8337
Pt    0.0987    0.4389    0.8303
Pt    0.1639    0.2906    0.7885
Pt    0.1634    0.2893    0.8316
Pt    0.1612    0.3328    0.7897
Pt    0.1617    0.3327    0.8318
Pt    0.1621    0.3744    0.7918
Pt    0.1634    0.3713    0.8323
Pt    0.1609    0.4155    0.7922
Pt    0.1610    0.4163    0.8350
Pt    0.1600    0.4546    0.7924
Pt    0.1643    0.4592    0.8352
Pt    0.1010    0.4362    0.7928
Pt    0.0991    0.3941    0.8328
Pt    0.2046    0.2895    0.7892
Pt    0.2040    0.2895    0.8339
Pt    0.2049    0.3312    0.7904
Pt    0.2059    0.3324    0.8327
Pt    0.2050    0.3744    0.7938
Pt    0.2049    0.3738    0.8343
Pt    0.2028    0.4169    0.7922
Pt    0.2051    0.4127    0.8355
Pt    0.2053    0.4595    0.7917
Pt    0.2062    0.4571    0.8350
Pt    0.0999    0.3954    0.7886
Pt    0.1008    0.3500    0.8313
Pt    0.2237    0.3974    0.7926
Pt    0.2261    0.3514    0.8339
Pt    0.2258    0.3519    0.7928
Pt    0.2243    0.3116    0.8323
Pt    0.2247    0.3104    0.7896
Pt    0.2254    0.2682    0.8325
Pt    0.2271    0.2659    0.7903
Pt    0.1855    0.4766    0.8348
Pt    0.1821    0.4783    0.7922
Pt    0.2223    0.2648    0.7470
Pt    0.0956    0.3539    0.7890
Pt    0.1850    0.4355    0.8359
Pt    0.1821    0.4334    0.7924
Pt    0.1800    0.3959    0.8344
Pt    0.1816    0.3942    0.7922
Pt    0.1864    0.3508    0.8325
Pt    0.1826    0.3536    0.7914
Pt    0.1819    0.3100    0.8294
Pt    0.2063    0.4967    0.7483
Pt    0.1842    0.3127    0.7908
Pt    0.1836    0.2665    0.8326
Pt    0.2240    0.4357    0.7489
Pt    0.9978    0.3926    0.8498
Pt    0.0381    0.2687    0.7669
Pt    0.0381    0.2702    0.8117
Pt    0.0376    0.2679    0.8513
Pt    0.0390    0.3118    0.7676
Pt    0.0381    0.3093    0.8095
Pt    0.0347    0.3124    0.8505
Pt    0.0362    0.3531    0.7690
Pt    0.0377    0.3514    0.8065
Pt    0.0379    0.3520    0.8503
Pt    0.0362    0.3965    0.7693
Pt    0.0371    0.3966    0.8109
Pt    0.0371    0.3965    0.8527
Pt    0.0296    0.4409    0.7894
Pt    0.0417    0.4413    0.8152
Pt    0.0400    0.4392    0.8544
Pt    0.0411    0.4659    0.7929
Pt    0.0777    0.2705    0.7687
Pt    0.0782    0.2695    0.8101
Pt    0.0812    0.2697    0.8519
Pt    0.0779    0.3087    0.7671
Pt    0.0809    0.3119    0.8125
Pt    0.0817    0.3103    0.8510
Pt    0.0756    0.3555    0.7684
Pt    0.0798    0.3558    0.8105
Pt    0.0804    0.3538    0.8520
Pt    0.0765    0.3957    0.7668
Pt    0.0751    0.3959    0.8118
Pt    0.0796    0.3946    0.8508
Pt    0.0820    0.4395    0.7752
Pt    0.0768    0.4374    0.8100
Pt    0.0778    0.4386    0.8534
Pt    0.0781    0.4816    0.8524
Pt    0.1196    0.2689    0.7656
Pt    0.1227    0.2652    0.8117
Pt    0.1224    0.2686    0.8539
Pt    0.1203    0.3125    0.7690
Pt    0.1196    0.3119    0.8098
Pt    0.1210    0.3091    0.8547
Pt    0.1167    0.3514    0.7659
Pt    0.1204    0.3522    0.8104
Pt    0.1204    0.3546    0.8514
Pt    0.1221    0.3936    0.7702
Pt    0.1198    0.3940    0.8118
Pt    0.1209    0.3965    0.8516
Pt    0.1202    0.4374    0.7726
Pt    0.1207    0.4412    0.8138
Pt    0.1185    0.4390    0.8541
Pt    0.1223    0.4820    0.8105
Pt    0.1208    0.4806    0.8539
Pt    0.1645    0.2700    0.7684
Pt    0.1644    0.2710    0.8083
Pt    0.1636    0.2711    0.8527
Pt    0.1630    0.3134    0.7704
Pt    0.1629    0.3136    0.8081
Pt    0.1627    0.3118    0.8513
Pt    0.1618    0.3527    0.7700
Pt    0.1628    0.3511    0.8111
Pt    0.1638    0.3525    0.8532
Pt    0.1599    0.3942    0.7725
Pt    0.1621    0.3947    0.8133
Pt    0.1610    0.3932    0.8530
Pt    0.1620    0.4360    0.7718
Pt    0.1645    0.4366    0.8146
Pt    0.1643    0.4380    0.8545
Pt    0.1648    0.4791    0.7710
Pt    0.1645    0.4787    0.8136
Pt    0.1656    0.4819    0.8535
Pt    0.2058    0.2666    0.7697
Pt    0.2058    0.2695    0.8130
Pt    0.2043    0.2683    0.8530
Pt    0.2038    0.3112    0.7692
Pt    0.2033    0.3099    0.8115
Pt    0.2050    0.3110    0.8536
Pt    0.2011    0.3528    0.7674
Pt    0.2057    0.3516    0.8125
Pt    0.2051    0.3548    0.8550
Pt    0.2034    0.3969    0.7714
Pt    0.2025    0.3951    0.8142
Pt    0.2065    0.3925    0.8552
Pt    0.2040    0.4366    0.7711
Pt    0.2057    0.4367    0.8133
Pt    0.2056    0.4357    0.8570
Pt    0.2038    0.4781    0.7678
Pt    0.2037    0.4768    0.8143
Pt    0.2077    0.4768    0.8538
Pt    0.1884    0.2661    0.7892
Pt    0.1431    0.4749    0.8343
Pt    0.1446    0.4787    0.7929
Pt    0.1424    0.4383    0.8342
Pt    0.1405    0.4344    0.7970
Pt    0.1396    0.3924    0.8339
Pt    0.1428    0.3940    0.7955
Pt    0.1412    0.3505    0.8326
Pt    0.1409    0.3548    0.7929
Pt    0.2454    0.3732    0.7487
Pt    0.1429    0.3087    0.8325
Pt    0.1373    0.3139    0.7900
Pt    0.9967    0.3335    0.8287
Pt    0.1421    0.2697    0.8325
Pt    0.1417    0.2696    0.7874
Pt    0.0804    0.2494    0.7886
Pt    0.0999    0.4805    0.8346
Pt    0.2444    0.2871    0.7479
Pt    0.0190    0.2900    0.7661
Pt    0.0160    0.2882    0.8101
Pt    0.0166    0.2891    0.8526
Pt    0.0189    0.3312    0.7660
Pt    0.0156    0.3313    0.8083
Pt    0.0151    0.3327    0.8487
Pt    0.0139    0.3722    0.7716
Pt    0.0155    0.3739    0.8093
Pt    0.0178    0.3729    0.8478
Pt    0.0186    0.4243    0.8118
Pt    0.0142    0.4142    0.8506
Pt    0.0034    0.4649    0.7849
Pt    0.1012    0.3103    0.8335
Pt    0.0564    0.2918    0.7664
Pt    0.0577    0.2909    0.8098
Pt    0.0585    0.2897    0.8515
Pt    0.0574    0.3319    0.7670
Pt    0.0601    0.3316    0.8111
Pt    0.0593    0.3312    0.8518
Pt    0.0561    0.3758    0.7686
Pt    0.0560    0.3745    0.8093
Pt    0.0563    0.3751    0.8518
Pt    0.0573    0.4203    0.7719
Pt    0.0574    0.4153    0.8119
Pt    0.0560    0.4176    0.8534
Pt    0.0594    0.4622    0.8165
Pt    0.0571    0.4629    0.8543
Pt    0.1004    0.2895    0.7670
Pt    0.1004    0.2915    0.8115
Pt    0.0997    0.2888    0.8525
Pt    0.0962    0.3322    0.7682
Pt    0.0974    0.3350    0.8096
Pt    0.1011    0.3328    0.8538
Pt    0.0964    0.3753    0.7688
Pt    0.1001    0.3757    0.8099
Pt    0.1013    0.3739    0.8537
Pt    0.0975    0.4186    0.7673
Pt    0.1002    0.4157    0.8119
Pt    0.1002    0.4205    0.8546
Pt    0.0977    0.4597    0.8118
Pt    0.1003    0.4604    0.8548
Pt    0.0987    0.3105    0.7885
Pt    0.1424    0.2900    0.7687
Pt    0.1430    0.2872    0.8098
Pt    0.1436    0.2900    0.8538
Pt    0.1409    0.3340    0.7697
Pt    0.1414    0.3304    0.8121
Pt    0.1423    0.3318    0.8542
Pt    0.1378    0.3729    0.7675
Pt    0.1396    0.3733    0.8129
Pt    0.1424    0.3704    0.8552
Pt    0.1402    0.4178    0.7737
Pt    0.1397    0.4161    0.8142
Pt    0.1406    0.4198    0.8547
Pt    0.1426    0.4553    0.7709
Pt    0.1421    0.4585    0.8142
Pt    0.1401    0.4570    0.8555
Pt    0.0185    0.2488    0.7665
Pt    0.1009    0.2687    0.8302
Pt    0.1011    0.2730    0.7898
Pt    0.1825    0.2912    0.7666
Pt    0.1845    0.2890    0.8093
Pt    0.1821    0.2923    0.8534
Pt    0.1813    0.3325    0.7690
Pt    0.1841    0.3326    0.8120
Pt    0.1822    0.3295    0.8495
Pt    0.1816    0.3730    0.7709
Pt    0.1856    0.3726    0.8121
Pt    0.1839    0.3739    0.8531
Pt    0.1842    0.4161    0.7705
Pt    0.1831    0.4153    0.8142
Pt    0.1860    0.4167    0.8563
Pt    0.1828    0.4581    0.7717
Pt    0.1856    0.4534    0.8125
Pt    0.1866    0.4582    0.8554
Pt    0.0598    0.4368    0.8338
Pt    0.0564    0.4443    0.7884
Pt    0.0575    0.3960    0.8315
Pt    0.2258    0.2877    0.7680
Pt    0.2249    0.2890    0.8095
Pt    0.2308    0.2898    0.8526
Pt    0.2238    0.3292    0.7703
Pt    0.2261    0.3304    0.8110
Pt    0.2275    0.3310    0.8524
Pt    0.2209    0.3740    0.7704
Pt    0.2251    0.3718    0.8138
Pt    0.2283    0.3709    0.8551
Pt    0.2242    0.4153    0.7694
Pt    0.2259    0.4154    0.8147
Pt    0.2286    0.4152    0.8562
Pt    0.2255    0.4561    0.7681
Pt    0.2272    0.4603    0.8120
Pt    0.2264    0.4554    0.8577
Pt    0.0576    0.3953    0.7887
Pt    0.0599    0.3524    0.8320
Pt    0.2462    0.3934    0.8128
Pt    0.0145    0.2687    0.7870
Pt    0.0173    0.2696    0.8317
Pt    0.0183    0.3129    0.7884
Pt    0.0145    0.3100    0.8290
Pt    0.0165    0.3516    0.7873
Pt    0.0174    0.3528    0.8281
Pt    0.0168    0.3946    0.7883
Pt    0.0140    0.3959    0.8256
Pt    0.0192    0.4390    0.8361
Pt    0.0210    0.4850    0.7922
Pt    0.0569    0.2668    0.7889
Pt    0.0581    0.2719    0.8309
Pt    0.0576    0.3104    0.7893
Pt    0.0584    0.3114    0.8326
Pt    0.0577    0.3542    0.7878
Pt    0.2031    0.4176    0.7493
Pt    0.1426    0.2480    0.8084
Pt    0.2455    0.2876    0.7903
Pt    0.2459    0.3117    0.8080
Pt    0.1394    0.3542    0.7475
Pt    0.2461    0.4353    0.7706
Pt    0.2264    0.2501    0.8105
Pt    0.9979    0.3303    0.7478
Pt    0.0585    0.2493    0.7672
Pt    0.2463    0.4567    0.7499
Pt    0.2043    0.2878    0.7475
Pt    0.0592    0.2492    0.8104
Pt    0.1450    0.2482    0.8516
Pt    0.1198    0.3313    0.7468
Pt    0.2461    0.3320    0.7886
Pt    0.1003    0.2491    0.8080
Pt    0.1612    0.3744    0.7487
Pt    0.1617    0.4573    0.7514
Pt    0.0365    0.2492    0.7895
Pt    0.1826    0.4790    0.7509
Pt    0.2032    0.3724    0.7476
Pt    0.1819    0.3953    0.7518
Pt    0.2242    0.4749    0.7478
Pt    0.0169    0.3555    0.7494
Pt    0.1851    0.2491    0.8535
Pt    0.2458    0.3726    0.7925
Pt    0.0117    0.4834    0.7650
Pt    0.1417    0.2687    0.7476
Pt    0.1222    0.4153    0.7512
Pt    0.1628    0.4159    0.7513
Pt    0.0744    0.3762    0.7478
Pt    0.0146    0.2513    0.8090
Pt    0.0550    0.3532    0.7482
Pt    0.2444    0.3109    0.7690
Pt    0.1612    0.2476    0.8295
Pt    0.0797    0.2481    0.8290
Pt    0.1408    0.4806    0.7504
Pt    0.1620    0.2480    0.7472
Pt    0.9965    0.3304    0.7865
Pt    0.0801    0.2473    0.8692
Pt    0.1411    0.3107    0.7499
Pt    0.2445    0.3737    0.8328
Pt    0.1596    0.3335    0.7476
Pt    0.9964    0.3110    0.7661
Pt    0.1637    0.2504    0.7886
Pt    0.0991    0.2495    0.7683
Pt    0.2036    0.4574    0.7475
Pt    0.1409    0.2497    0.7671
Pt    0.2293    0.2678    0.8705
Pt    0.0586    0.3107    0.8702
Pt    0.2291    0.4955    0.8598
Pt    0.0136    0.4383    0.8699
Pt    0.2237    0.3926    0.7505
Pt    0.2442    0.4161    0.7899
Pt    0.0997    0.3134    0.7485
Pt    0.1812    0.4389    0.7506
Pt    0.2443    0.3523    0.7704
Pt    0.2454    0.4127    0.7519
Pt    0.0811    0.2918    0.7473
Pt    0.0358    0.3750    0.7515
Pt    0.2028    0.4963    0.7927
Pt    0.0163    0.3537    0.8706
Pt    0.2453    0.2694    0.8110
Pt    0.1423    0.3973    0.7486
Pt    0.2434    0.3898    0.7709
Pt    0.1614    0.2893    0.7472
Pt    0.0589    0.2648    0.8708
Pt    0.0177    0.2667    0.8697
Pt    0.2239    0.3509    0.7490
Pt    0.2436    0.3303    0.7473
Pt    0.2446    0.2654    0.7666
Pt    0.2464    0.3527    0.8113
Pt    0.1848    0.2693    0.7495
Pt    0.1822    0.3104    0.7475
Pt    0.2463    0.4568    0.7908
Pt    0.0994    0.3963    0.8705
Pt    0.1424    0.4364    0.7507
Pt    0.0398    0.3328    0.8709
Pt    0.0794    0.4165    0.8703
Pt    0.2245    0.3099    0.8715
Pt    0.0381    0.2903    0.8713
Pt    0.2251    0.4966    0.8141
Pt    0.2264    0.2469    0.8519
Pt    0.1215    0.2468    0.7882
Pt    0.1643    0.2475    0.8714
Pt    0.1041    0.2666    0.8736
Pt    0.2238    0.4166    0.9848
Pt    0.2246    0.4361    0.9148
Pt    0.1027    0.3518    0.8729
Pt    0.2273    0.4010    0.9596
Pt    0.2321    0.3960    0.9171
Pt    0.1860    0.2493    0.9767
Pt    0.2289    0.3514    0.9543
Pt    0.2268    0.3527    0.9188
Pt    0.1208    0.4611    0.8749
Pt    0.2270    0.2479    0.9744
Pt    0.2281    0.3094    0.9563
Pt    0.2287    0.3074    0.9110
Pt    0.2088    0.3724    0.8755
Pt    0.2301    0.2684    0.9543
Pt    0.2262    0.2722    0.9124
Pt    0.1858    0.4382    0.8763
Pt    0.0377    0.2882    0.9127
Pt    0.0360    0.2883    0.9556
Pt    0.1843    0.2483    0.8937
Pt    0.0349    0.3305    0.9121
Pt    0.0376    0.3317    0.9542
Pt    0.9971    0.4304    0.9774
Pt    0.0380    0.3726    0.9124
Pt    0.0335    0.3711    0.9540
Pt    0.0560    0.4746    0.8797
Pt    0.0383    0.4194    0.9149
Pt    0.0386    0.4169    0.9568
Pt    0.1848    0.3933    0.8738
Pt    0.0379    0.4552    0.9158
Pt    0.0355    0.4566    0.9548
Pt    0.1840    0.2712    0.8729
Pt    0.0387    0.2489    0.9135
Pt    0.0561    0.2496    0.8924
Pt    0.0771    0.2928    0.9145
Pt    0.0791    0.2908    0.9558
Pt    0.0606    0.2497    0.9763
Pt    0.0784    0.3309    0.9144
Pt    0.0774    0.3323    0.9593
Pt    0.0777    0.3764    0.8724
Pt    0.0795    0.3719    0.9141
Pt    0.0802    0.3736    0.9555
Pt    0.1431    0.3514    0.8758
Pt    0.0785    0.4155    0.9134
Pt    0.0813    0.4153    0.9568
Pt    0.9971    0.3298    0.9136
Pt    0.0792    0.4569    0.9135
Pt    0.0808    0.4584    0.9556
Pt    0.1006    0.4371    0.9551
Pt    0.1029    0.4344    0.9163
Pt    0.2073    0.4133    0.8748
Pt    0.0156    0.3938    0.8724
Pt    0.1206    0.2899    0.9128
Pt    0.1187    0.2884    0.9547
Pt    0.2077    0.2493    0.9143
Pt    0.1185    0.3313    0.9168
Pt    0.1215    0.3342    0.9575
Pt    0.2279    0.3951    0.8760
Pt    0.1215    0.3734    0.9146
Pt    0.1234    0.3744    0.9572
Pt    0.1018    0.2488    0.9339
Pt    0.1232    0.4156    0.9153
Pt    0.1229    0.4156    0.9564
Pt    0.1415    0.2701    0.8757
Pt    0.1239    0.4566    0.9185
Pt    0.1236    0.4571    0.9589
Pt    0.1438    0.2511    0.9768
Pt    0.1011    0.3915    0.9547
Pt    0.0597    0.3971    0.8724
Pt    0.1611    0.2918    0.9141
Pt    0.1625    0.2939    0.9560
Pt    0.1844    0.2472    0.9333
Pt    0.1635    0.3319    0.9171
Pt    0.1638    0.3336    0.9578
Pt    0.0776    0.4967    0.9164
Pt    0.1634    0.3761    0.9154
Pt    0.1639    0.3745    0.9595
Pt    0.0981    0.4402    0.8749
Pt    0.1631    0.4161    0.9153
Pt    0.1626    0.4132    0.9609
Pt    0.1651    0.2473    0.9142
Pt    0.1670    0.4600    0.9142
Pt    0.1647    0.4572    0.9565
Pt    0.1012    0.3943    0.9144
Pt    0.0797    0.2496    0.9570
Pt    0.2038    0.2896    0.9135
Pt    0.2059    0.2931    0.9567
Pt    0.2464    0.2673    0.8935
Pt    0.2054    0.3326    0.9150
Pt    0.2077    0.3307    0.9580
Pt    0.0183    0.3105    0.8733
Pt    0.2057    0.3729    0.9153
Pt    0.2105    0.3769    0.9607
Pt    0.0160    0.4961    0.9356
Pt    0.2055    0.4119    0.9166
Pt    0.2037    0.4168    0.9614
Pt    0.9972    0.2481    0.9560
Pt    0.2041    0.4545    0.9149
Pt    0.2022    0.4530    0.9617
Pt    0.1821    0.3108    0.8731
Pt    0.1010    0.2467    0.9749
Pt    0.1815    0.4342    0.9585
Pt    0.1851    0.4353    0.9176
Pt    0.1206    0.2474    0.9107
Pt    0.1855    0.3925    0.9567
Pt    0.1851    0.3954    0.9180
Pt    0.1866    0.3533    0.8740
Pt    0.2284    0.4341    0.8773
Pt    0.1846    0.3527    0.9584
Pt    0.2456    0.3724    0.8756
Pt    0.1829    0.3548    0.9154
Pt    0.2064    0.2479    0.8724
Pt    0.1864    0.3124    0.9567
Pt    0.1844    0.3131    0.9171
Pt    0.2046    0.2492    0.9535
Pt    0.1869    0.2718    0.9562
Pt    0.1845    0.2673    0.9160
Pt    0.2270    0.2664    0.9964
Pt    0.1436    0.4800    0.9171
Pt    0.1205    0.3288    0.9956
Pt    0.1451    0.4350    0.9581
Pt    0.1443    0.4355    0.9135
Pt    0.0986    0.3103    0.8747
Pt    0.0354    0.4953    0.9168
Pt    0.1421    0.3936    0.9597
Pt    0.1866    0.4819    0.8720
Pt    0.1432    0.3982    0.9171
Pt    0.0174    0.2475    0.9741
Pt    0.0365    0.2704    0.8906
Pt    0.0391    0.2683    0.9338
Pt    0.0374    0.2659    0.9743
Pt    0.0378    0.3102    0.8912
Pt    0.0361    0.3103    0.9350
Pt    0.0382    0.3106    0.9736
Pt    0.0374    0.3498    0.8923
Pt    0.0387    0.3524    0.9317
Pt    0.0369    0.3504    0.9788
Pt    0.0381    0.3964    0.8930
Pt    0.0370    0.3929    0.9346
Pt    0.0392    0.3939    0.9750
Pt    0.0342    0.4368    0.8926
Pt    0.0391    0.4366    0.9372
Pt    0.0376    0.4358    0.9789
Pt    0.0339    0.4760    0.8965
Pt    0.0368    0.4745    0.9354
Pt    0.0346    0.4776    0.9773
Pt    0.0821    0.2678    0.8901
Pt    0.0759    0.2681    0.9346
Pt    0.0794    0.2702    0.9759
Pt    0.0784    0.3104    0.8915
Pt    0.0778    0.3110    0.9363
Pt    0.0791    0.3099    0.9760
Pt    0.0805    0.3526    0.8916
Pt    0.0756    0.3529    0.9368
Pt    0.0750    0.3548    0.9770
Pt    0.0805    0.3958    0.8936
Pt    0.0799    0.3935    0.9335
Pt    0.0790    0.3945    0.9750
Pt    0.0802    0.4361    0.8948
Pt    0.0817    0.4333    0.9349
Pt    0.0804    0.4352    0.9771
Pt    0.0810    0.4791    0.8936
Pt    0.0789    0.4765    0.9356
Pt    0.0807    0.4757    0.9772
Pt    0.1217    0.2685    0.8945
Pt    0.1230    0.2690    0.9315
Pt    0.1220    0.2693    0.9751
Pt    0.1220    0.3118    0.8944
Pt    0.1218    0.3099    0.9364
Pt    0.1219    0.3089    0.9753
Pt    0.1209    0.3519    0.8963
Pt    0.1210    0.3529    0.9384
Pt    0.1227    0.3546    0.9841
Pt    0.1190    0.3937    0.8935
Pt    0.1218    0.3938    0.9348
Pt    0.1205    0.3940    0.9775
Pt    0.1221    0.4401    0.8930
Pt    0.1241    0.4366    0.9359
Pt    0.1224    0.4374    0.9778
Pt    0.1204    0.4804    0.8975
Pt    0.1248    0.4768    0.9386
Pt    0.1614    0.2671    0.8927
Pt    0.1649    0.2720    0.9356
Pt    0.1660    0.2711    0.9772
Pt    0.1625    0.3120    0.8975
Pt    0.1630    0.3135    0.9371
Pt    0.1649    0.3136    0.9766
Pt    0.1651    0.3538    0.8946
Pt    0.1639    0.3533    0.9375
Pt    0.1638    0.3554    0.9791
Pt    0.1640    0.3938    0.8937
Pt    0.1621    0.3928    0.9379
Pt    0.1613    0.3944    0.9824
Pt    0.1638    0.4404    0.8934
Pt    0.1628    0.4394    0.9337
Pt    0.1636    0.4365    0.9798
Pt    0.1663    0.4836    0.8933
Pt    0.2049    0.2689    0.8919
Pt    0.2073    0.2716    0.9353
Pt    0.2085    0.2692    0.9764
Pt    0.2061    0.3099    0.8931
Pt    0.2060    0.3119    0.9359
Pt    0.2056    0.3123    0.9771
Pt    0.2079    0.3502    0.8949
Pt    0.2062    0.3541    0.9396
Pt    0.2067    0.3543    0.9781
Pt    0.2069    0.3951    0.8950
Pt    0.2045    0.3958    0.9392
Pt    0.2066    0.3965    0.9826
Pt    0.2055    0.4350    0.8944
Pt    0.2064    0.4349    0.9394
Pt    0.1909    0.4627    0.9849
Pt    0.1423    0.3546    0.9585
Pt    0.1464    0.3545    0.9146
Pt    0.0776    0.2874    0.8716
Pt    0.1418    0.3163    0.9560
Pt    0.1421    0.3110    0.9161
Pt    0.1429    0.3131    0.8761
Pt    0.1465    0.2702    0.9560
Pt    0.1423    0.2676    0.9139
Pt    0.0369    0.3745    0.8731
Pt    0.1009    0.4753    0.9580
Pt    0.1009    0.4798    0.9171
Pt    0.0144    0.2885    0.8912
Pt    0.0159    0.2900    0.9345
Pt    0.0149    0.2900    0.9760
Pt    0.0169    0.3320    0.8904
Pt    0.0170    0.3315    0.9348
Pt    0.0158    0.3313    0.9760
Pt    0.0171    0.3704    0.8920
Pt    0.0162    0.3727    0.9308
Pt    0.0172    0.3724    0.9768
Pt    0.0150    0.4160    0.8930
Pt    0.0142    0.4136    0.9339
Pt    0.0187    0.4121    0.9757
Pt    0.0137    0.4564    0.8949
Pt    0.0157    0.4557    0.9335
Pt    0.0141    0.4545    0.9734
Pt    0.2060    0.3314    0.8724
Pt    0.0967    0.3524    0.9569
Pt    0.0343    0.4175    0.8724
Pt    0.0578    0.2888    0.8927
Pt    0.0578    0.2894    0.9325
Pt    0.0572    0.2904    0.9782
Pt    0.0577    0.3330    0.8932
Pt    0.0577    0.3293    0.9330
Pt    0.0561    0.3315    0.9774
Pt    0.0590    0.3730    0.8926
Pt    0.0566    0.3735    0.9340
Pt    0.0579    0.3739    0.9756
Pt    0.0566    0.4164    0.8930
Pt    0.0591    0.4140    0.9368
Pt    0.0584    0.4169    0.9767
Pt    0.0570    0.4541    0.8965
Pt    0.0595    0.4554    0.9353
Pt    0.0593    0.4539    0.9762
Pt    0.0999    0.3520    0.9146
Pt    0.2054    0.4561    0.8763
Pt    0.1016    0.3145    0.9537
Pt    0.0990    0.2887    0.8929
Pt    0.0985    0.2906    0.9328
Pt    0.0987    0.2926    0.9747
Pt    0.1003    0.3306    0.8929
Pt    0.0983    0.3322    0.9353
Pt    0.1002    0.3362    0.9773
Pt    0.1002    0.3740    0.8937
Pt    0.0981    0.3701    0.9349
Pt    0.0989    0.3740    0.9787
Pt    0.1024    0.4193    0.8937
Pt    0.1024    0.4123    0.9368
Pt    0.1043    0.4182    0.9766
Pt    0.1016    0.4587    0.8973
Pt    0.1017    0.4575    0.9355
Pt    0.0996    0.4540    0.9773
Pt    0.1010    0.3119    0.9152
Pt    0.2195    0.4476    0.9864
Pt    0.0576    0.4959    0.9381
Pt    0.1428    0.2906    0.8939
Pt    0.1402    0.2895    0.9355
Pt    0.1435    0.2916    0.9758
Pt    0.1405    0.3327    0.8970
Pt    0.1407    0.3339    0.9341
Pt    0.1450    0.3344    0.9780
Pt    0.1431    0.3748    0.8966
Pt    0.1410    0.3733    0.9354
Pt    0.1418    0.3754    0.9824
Pt    0.1421    0.4111    0.8925
Pt    0.1442    0.4168    0.9384
Pt    0.1417    0.4143    0.9797
Pt    0.1433    0.4596    0.8966
Pt    0.1472    0.4615    0.9349
Pt    0.0991    0.2713    0.9529
Pt    0.1840    0.2900    0.8955
Pt    0.1839    0.2915    0.9354
Pt    0.1856    0.2908    0.9762
Pt    0.1860    0.3315    0.8908
Pt    0.1868    0.3354    0.9373
Pt    0.1846    0.3339    0.9780
Pt    0.1847    0.3745    0.8938
Pt    0.1862    0.3723    0.9380
Pt    0.1863    0.3749    0.9768
Pt    0.1851    0.4138    0.8931
Pt    0.1811    0.4158    0.9371
Pt    0.1816    0.4111    0.9800
Pt    0.1858    0.4660    0.8949
Pt    0.1857    0.4548    0.9365
Pt    0.2269    0.2889    0.8915
Pt    0.2274    0.2920    0.9335
Pt    0.2276    0.2903    0.9763
Pt    0.2284    0.3298    0.8938
Pt    0.2258    0.3309    0.9335
Pt    0.2277    0.3334    0.9768
Pt    0.2283    0.3760    0.8974
Pt    0.2296    0.3747    0.9349
Pt    0.2317    0.3774    0.9791
Pt    0.2292    0.4138    0.8971
Pt    0.2245    0.4150    0.9371
Pt    0.1921    0.4352    0.9861
Pt    0.0981    0.2688    0.9132
Pt    0.0183    0.2481    0.8920
Pt    0.0169    0.2705    0.9135
Pt    0.0176    0.2686    0.9550
Pt    0.1384    0.3925    0.8733
Pt    0.0143    0.3098    0.9163
Pt    0.0155    0.3118    0.9556
Pt    0.0601    0.4754    0.9576
Pt    0.0163    0.3511    0.9134
Pt    0.0153    0.3515    0.9584
Pt    0.1632    0.2484    0.9961
Pt    0.0157    0.3936    0.9102
Pt    0.0178    0.3922    0.9550
Pt    0.1401    0.2493    0.9359
Pt    0.0124    0.4337    0.9126
Pt    0.0164    0.4345    0.9553
Pt    0.0145    0.4779    0.9157
Pt    0.0165    0.4757    0.9554
Pt    0.9979    0.3729    0.9533
Pt    0.0613    0.2687    0.9117
Pt    0.0585    0.2687    0.9544
Pt    0.1208    0.3316    0.8738
Pt    0.0563    0.3104    0.9113
Pt    0.0560    0.3090    0.9547
Pt    0.0576    0.4771    0.9140
Pt    0.0588    0.3538    0.9131
Pt    0.0553    0.3536    0.9533
Pt    0.0556    0.2694    0.9952
Pt    0.0601    0.3929    0.9138
Pt    0.0565    0.3933    0.9552
Pt    0.1242    0.2478    0.9577
Pt    0.0595    0.4355    0.9176
Pt    0.0614    0.4347    0.9554
Pt    0.2280    0.2507    0.9328
Pt    0.1656    0.4621    0.8739
Pt    0.1629    0.3726    0.8729
Pt    0.2256    0.4365    0.9602
Pt    0.0601    0.4366    0.8761
Pt    0.0360    0.4964    0.9577
Pt    0.1434    0.4827    0.8736
Pt    0.1420    0.4398    0.8764
Pt    0.1210    0.4171    0.8749
Pt    0.1637    0.3317    0.8729
Pt    0.2442    0.3797    0.9558
Pt    0.2069    0.2486    0.9962
Pt    0.1658    0.2489    0.9567
Pt    0.0150    0.4963    0.9742
Pt    0.1426    0.3134    0.9950
Pt    0.1629    0.4171    0.8739
Pt    0.0174    0.2716    0.9960
Pt    0.2065    0.2897    0.8734
Pt    0.0770    0.4617    0.8734
Pt    0.1616    0.2906    0.8746
Pt    0.1214    0.2900    0.8756
Pt    0.2295    0.3498    0.8750
Pt    0.1209    0.3720    0.8746
Pt    0.1007    0.2698    0.9940
Pt    0.1019    0.4809    0.8746
Pt    0.0791    0.4962    0.9949
Pt    0.1210    0.2926    0.9962
Pt    0.0385    0.4118    0.9960
Pt    0.0593    0.3113    0.9962
Pt    0.1216    0.2473    0.9963
Pt    0.1005    0.3132    0.9957
Pt    0.0598    0.3542    0.8719
Pt    0.0787    0.3331    0.8725
Pt    0.0332    0.4604    0.8724
Pt    0.0993    0.2469    0.8927
Pt    0.0802    0.2469    0.9124
Pt    0.2260    0.3550    0.9966
Pt    0.1422    0.6809    0.9990
Pt    0.2256    0.7241    0.0809
Pt    0.2294    0.7273    0.0373
Pt    0.2313    0.6185    0.0962
Pt    0.1636    0.7442    0.1214
Pt    0.2275    0.6832    0.0795
Pt    0.2273    0.6807    0.9978
Pt    0.2283    0.6815    0.0381
Pt    0.2256    0.6181    0.0571
Pt    0.0800    0.4976    0.0386
Pt    0.2287    0.6368    0.0751
Pt    0.2272    0.6375    0.0362
Pt    0.2260    0.6195    0.0167
Pt    0.9998    0.7028    0.0813
Pt    0.2311    0.5978    0.0757
Pt    0.2212    0.5978    0.0350
Pt    0.0171    0.4975    0.0611
Pt    0.2265    0.5619    0.0768
Pt    0.2071    0.5354    0.0439
Pt    0.1999    0.5125    0.0616
Pt    0.2240    0.5814    0.0555
Pt    0.1883    0.7439    0.0167
Pt    0.1872    0.7228    0.0774
Pt    0.0167    0.7259    0.9987
Pt    0.0377    0.5368    0.0380
Pt    0.0370    0.5358    0.0814
Pt    0.2293    0.7467    0.0165
Pt    0.1644    0.7440    0.0361
Pt    0.0384    0.5792    0.0374
Pt    0.0378    0.5782    0.0785
Pt    0.1013    0.6826    0.0800
Pt    0.1017    0.6844    0.0361
Pt    0.0386    0.6188    0.0333
Pt    0.0392    0.6185    0.0785
Pt    0.1004    0.6412    0.0783
Pt    0.1017    0.6392    0.0392
Pt    0.0403    0.6620    0.0351
Pt    0.0413    0.6598    0.0803
Pt    0.1016    0.5996    0.0765
Pt    0.1003    0.5983    0.0368
Pt    0.0354    0.7053    0.0386
Pt    0.0397    0.7016    0.0817
Pt    0.0977    0.5561    0.0788
Pt    0.1027    0.5571    0.0373
Pt    0.9965    0.6413    0.0172
Pt    0.2462    0.6848    0.1009
Pt    0.2041    0.5004    0.0052
Pt    0.1010    0.5164    0.0800
Pt    0.0814    0.5359    0.0383
Pt    0.0797    0.5354    0.0799
Pt    0.1029    0.5140    0.0340
Pt    0.0580    0.7456    0.0153
Pt    0.0808    0.5778    0.0385
Pt    0.0818    0.5784    0.0808
Pt    0.0562    0.7255    0.0802
Pt    0.0583    0.7261    0.0376
Pt    0.0805    0.6198    0.0371
Pt    0.0798    0.6191    0.0771
Pt    0.0597    0.6816    0.0805
Pt    0.0607    0.6842    0.0365
Pt    0.0808    0.6606    0.0352
Pt    0.0792    0.6607    0.0791
Pt    0.0589    0.6394    0.0785
Pt    0.0588    0.6394    0.0370
Pt    0.0785    0.7033    0.0375
Pt    0.0780    0.7081    0.0808
Pt    0.0577    0.5986    0.0783
Pt    0.0629    0.5999    0.0358
Pt    0.9974    0.7447    0.0838
Pt    0.0999    0.4968    0.0584
Pt    0.0572    0.5568    0.0785
Pt    0.1232    0.5368    0.0393
Pt    0.1217    0.5366    0.0775
Pt    0.9966    0.5167    0.0604
Pt    0.0165    0.6854    0.9970
Pt    0.1207    0.5792    0.0381
Pt    0.1236    0.5767    0.0808
Pt    0.1409    0.7442    0.0568
Pt    0.0572    0.5585    0.0386
Pt    0.1226    0.6193    0.0367
Pt    0.1226    0.6181    0.0803
Pt    0.2291    0.7025    0.0184
Pt    0.0576    0.5144    0.0812
Pt    0.1214    0.6597    0.0392
Pt    0.1207    0.6618    0.0772
Pt    0.2073    0.5805    0.1194
Pt    0.0582    0.5184    0.0357
Pt    0.1219    0.7049    0.0357
Pt    0.1202    0.7051    0.0800
Pt    0.2278    0.6629    0.0976
Pt    0.0172    0.7246    0.0821
Pt    0.0362    0.7462    0.0811
Pt    0.1792    0.5023    0.0161
Pt    0.2259    0.6606    0.0589
Pt    0.1608    0.5349    0.0330
Pt    0.1657    0.5385    0.0804
Pt    0.2067    0.7030    0.9974
Pt    0.1625    0.5764    0.0352
Pt    0.1639    0.5782    0.0799
Pt    0.1397    0.6414    0.1206
Pt    0.2268    0.7065    0.1023
Pt    0.1621    0.6195    0.0367
Pt    0.1630    0.6187    0.0782
Pt    0.0143    0.7444    0.1041
Pt    0.0170    0.7252    0.0413
Pt    0.1601    0.6615    0.0390
Pt    0.1642    0.6639    0.0792
Pt    0.0591    0.7448    0.1048
Pt    0.0177    0.6814    0.0802
Pt    0.1664    0.7018    0.0347
Pt    0.1642    0.7070    0.0799
Pt    0.9967    0.7456    0.0406
Pt    0.0184    0.6814    0.0386
Pt    0.1423    0.7442    0.1023
Pt    0.0781    0.7455    0.0377
Pt    0.1023    0.6845    0.1192
Pt    0.1913    0.5309    0.0200
Pt    0.2055    0.5370    0.0727
Pt    0.1844    0.7445    0.0975
Pt    0.2014    0.5761    0.0327
Pt    0.2038    0.5793    0.0773
Pt    0.0166    0.7443    0.0618
Pt    0.2018    0.6194    0.0359
Pt    0.2042    0.6209    0.0771
Pt    0.9964    0.5570    0.0166
Pt    0.0375    0.4968    0.0809
Pt    0.2050    0.6623    0.0364
Pt    0.2046    0.6599    0.0803
Pt    0.1625    0.7462    0.0758
Pt    0.0189    0.6402    0.0802
Pt    0.2077    0.7025    0.0399
Pt    0.2054    0.7020    0.0792
Pt    0.9983    0.5979    0.1012
Pt    0.0186    0.6432    0.0356
Pt    0.9982    0.6838    0.0200
Pt    0.0587    0.5158    0.9988
Pt    0.1660    0.5783    0.1213
Pt    0.1860    0.7264    0.0374
Pt    0.0789    0.7465    0.0804
Pt    0.9980    0.6403    0.1011
Pt    0.1852    0.6824    0.1193
Pt    0.1840    0.6835    0.0784
Pt    0.0818    0.6193    0.1208
Pt    0.1836    0.6799    0.0380
Pt    0.0192    0.6019    0.0764
Pt    0.0003    0.5831    0.0803
Pt    0.1845    0.6400    0.0762
Pt    0.1839    0.6410    0.0352
Pt    0.0163    0.6010    0.0373
Pt    0.2084    0.7460    0.0365
Pt    0.1839    0.5987    0.0787
Pt    0.1830    0.5982    0.0349
Pt    0.1880    0.5545    0.1173
Pt    0.1844    0.5570    0.0755
Pt    0.1836    0.5572    0.0321
Pt    0.2256    0.6595    0.0180
Pt    0.1658    0.5371    0.1187
Pt    0.2256    0.6833    0.1192
Pt    0.1425    0.7250    0.0758
Pt    0.1855    0.7009    0.0998
Pt    0.1465    0.7228    0.0377
Pt    0.0157    0.5582    0.0786
Pt    0.2311    0.5803    0.0964
Pt    0.1415    0.6863    0.0781
Pt    0.1437    0.6838    0.0341
Pt    0.0169    0.5585    0.0382
Pt    0.2260    0.7037    0.0577
Pt    0.1425    0.6416    0.0791
Pt    0.1431    0.6397    0.0389
Pt    0.0153    0.5167    0.0798
Pt    0.2042    0.5097    0.0313
Pt    0.1432    0.5975    0.0782
Pt    0.0379    0.5179    0.0178
Pt    0.0378    0.5186    0.0588
Pt    0.0378    0.5143    0.1018
Pt    0.0371    0.5611    0.0146
Pt    0.0359    0.5559    0.0607
Pt    0.0374    0.5553    0.1006
Pt    0.0435    0.5976    0.0166
Pt    0.0386    0.5996    0.0554
Pt    0.0382    0.5971    0.1000
Pt    0.0389    0.6392    0.0156
Pt    0.0390    0.6414    0.0583
Pt    0.0411    0.6393    0.1007
Pt    0.0381    0.6844    0.0174
Pt    0.0409    0.6800    0.0578
Pt    0.0349    0.6778    0.1015
Pt    0.0356    0.7272    0.0208
Pt    0.0353    0.7240    0.0612
Pt    0.0380    0.7221    0.1026
Pt    0.0801    0.5171    0.0178
Pt    0.0798    0.5175    0.0582
Pt    0.0793    0.5155    0.0995
Pt    0.0797    0.5579    0.0124
Pt    0.0775    0.5552    0.0607
Pt    0.0784    0.5592    0.0997
Pt    0.0804    0.5975    0.0129
Pt    0.0798    0.5973    0.0593
Pt    0.0815    0.6003    0.0997
Pt    0.0823    0.6401    0.0124
Pt    0.0795    0.6390    0.0579
Pt    0.0790    0.6384    0.0982
Pt    0.0828    0.6801    0.0144
Pt    0.0803    0.6844    0.0599
Pt    0.0796    0.6818    0.0998
Pt    0.0793    0.7260    0.0193
Pt    0.0763    0.7261    0.0596
Pt    0.0787    0.7257    0.1027
Pt    0.1236    0.5159    0.0594
Pt    0.1212    0.5171    0.0989
Pt    0.1187    0.5557    0.0141
Pt    0.1204    0.5555    0.0589
Pt    0.1205    0.5562    0.0993
Pt    0.1188    0.5989    0.0169
Pt    0.1215    0.5989    0.0574
Pt    0.1226    0.5985    0.1000
Pt    0.1212    0.6404    0.0167
Pt    0.1218    0.6397    0.0587
Pt    0.1199    0.6419    0.0981
Pt    0.1218    0.6808    0.0172
Pt    0.1218    0.6825    0.0573
Pt    0.1230    0.6838    0.0999
Pt    0.1232    0.7259    0.0183
Pt    0.1204    0.7267    0.0571
Pt    0.1205    0.7264    0.1005
Pt    0.1663    0.5173    0.0991
Pt    0.1618    0.5537    0.0151
Pt    0.1632    0.5586    0.0565
Pt    0.1651    0.5578    0.0979
Pt    0.1606    0.5981    0.0148
Pt    0.1633    0.5972    0.0579
Pt    0.1645    0.5992    0.0997
Pt    0.1639    0.6415    0.0152
Pt    0.1632    0.6415    0.0590
Pt    0.1620    0.6408    0.0978
Pt    0.1649    0.6836    0.0166
Pt    0.1608    0.6858    0.0593
Pt    0.1627    0.6855    0.0960
Pt    0.1662    0.7228    0.0172
Pt    0.1659    0.7243    0.0580
Pt    0.1622    0.7270    0.0971
Pt    0.1780    0.5126    0.0414
Pt    0.2062    0.5609    0.0573
Pt    0.2065    0.5587    0.0952
Pt    0.2031    0.5989    0.0156
Pt    0.2033    0.5986    0.0556
Pt    0.2095    0.5998    0.0948
Pt    0.2044    0.6399    0.0150
Pt    0.2070    0.6410    0.0563
Pt    0.2100    0.6388    0.0981
Pt    0.2062    0.6828    0.0180
Pt    0.2059    0.6799    0.0593
Pt    0.2073    0.6825    0.0979
Pt    0.2082    0.7232    0.0171
Pt    0.2076    0.7249    0.0571
Pt    0.2068    0.7236    0.0993
Pt    0.1414    0.5974    0.0350
Pt    0.1851    0.7228    0.9967
Pt    0.1646    0.7014    0.1197
Pt    0.1442    0.5548    0.0780
Pt    0.1408    0.5531    0.0353
Pt    0.9980    0.6619    0.0818
Pt    0.1441    0.5178    0.0789
Pt    0.0198    0.5171    0.0387
Pt    0.0990    0.7251    0.0773
Pt    0.1003    0.7225    0.0378
Pt    0.2277    0.6410    0.1201
Pt    0.0152    0.5382    0.0186
Pt    0.0127    0.5382    0.0596
Pt    0.0155    0.5377    0.1008
Pt    0.0168    0.5800    0.0170
Pt    0.0176    0.5797    0.0577
Pt    0.0160    0.5750    0.1006
Pt    0.0168    0.6221    0.0148
Pt    0.0180    0.6234    0.0570
Pt    0.0189    0.6177    0.1014
Pt    0.0169    0.6617    0.0160
Pt    0.0163    0.6600    0.0594
Pt    0.0189    0.6574    0.1020
Pt    0.0154    0.7048    0.0186
Pt    0.0190    0.6993    0.0600
Pt    0.0175    0.7022    0.1047
Pt    0.0812    0.5790    0.1203
Pt    0.2279    0.5594    0.1204
Pt    0.0985    0.5559    0.1201
Pt    0.0600    0.5403    0.0156
Pt    0.0579    0.5368    0.0570
Pt    0.0577    0.5350    0.0996
Pt    0.0606    0.5766    0.0179
Pt    0.0619    0.5777    0.0585
Pt    0.0602    0.5788    0.1010
Pt    0.0624    0.6208    0.0131
Pt    0.0579    0.6212    0.0569
Pt    0.0597    0.6175    0.0996
Pt    0.0591    0.6622    0.0145
Pt    0.0616    0.6638    0.0560
Pt    0.0614    0.6588    0.1030
Pt    0.0588    0.7043    0.0165
Pt    0.0594    0.7034    0.0584
Pt    0.0591    0.7026    0.1026
Pt    0.1020    0.7254    0.9968
Pt    0.0992    0.7460    0.0972
Pt    0.2067    0.7453    0.0769
Pt    0.1013    0.5358    0.0191
Pt    0.1022    0.5344    0.0589
Pt    0.1004    0.5362    0.1007
Pt    0.1008    0.5774    0.0167
Pt    0.1011    0.5772    0.0592
Pt    0.1004    0.5798    0.0988
Pt    0.1005    0.6194    0.0148
Pt    0.1013    0.6189    0.0575
Pt    0.0999    0.6195    0.0990
Pt    0.1014    0.6609    0.0165
Pt    0.0982    0.6601    0.0573
Pt    0.1029    0.6624    0.0993
Pt    0.1027    0.7036    0.0162
Pt    0.0988    0.7033    0.0593
Pt    0.1011    0.7075    0.1005
Pt    0.9968    0.6228    0.0384
Pt    0.1852    0.6001    0.1181
Pt    0.1228    0.7037    0.1186
Pt    0.1463    0.5357    0.0563
Pt    0.1401    0.5374    0.1014
Pt    0.1394    0.5741    0.0169
Pt    0.1408    0.5773    0.0588
Pt    0.1419    0.5770    0.1008
Pt    0.1415    0.6223    0.0138
Pt    0.1417    0.6181    0.0591
Pt    0.1433    0.6212    0.1006
Pt    0.1436    0.6612    0.0180
Pt    0.1431    0.6646    0.0592
Pt    0.1413    0.6603    0.1003
Pt    0.1451    0.7043    0.0157
Pt    0.1391    0.7065    0.0590
Pt    0.1413    0.7087    0.0985
Pt    0.2463    0.6637    0.1210
Pt    0.1851    0.7008    0.0581
Pt    0.1438    0.5991    0.1182
Pt    0.1826    0.5376    0.0542
Pt    0.1879    0.5360    0.0951
Pt    0.1792    0.5780    0.0143
Pt    0.1843    0.5777    0.0562
Pt    0.1861    0.5792    0.1014
Pt    0.1821    0.6172    0.0129
Pt    0.1824    0.6197    0.0551
Pt    0.1858    0.6221    0.0984
Pt    0.1848    0.6605    0.0146
Pt    0.1846    0.6633    0.0595
Pt    0.1840    0.6588    0.0982
Pt    0.1854    0.7029    0.0172
Pt    0.1442    0.5582    0.1197
Pt    0.9966    0.6006    0.0578
Pt    0.2265    0.6010    0.1204
Pt    0.0365    0.6625    0.9966
Pt    0.2464    0.5782    0.1202
Pt    0.1455    0.7457    0.0154
Pt    0.9989    0.5148    0.1060
Pt    0.0596    0.5139    0.1206
Pt    0.1444    0.6816    0.1210
Pt    0.1457    0.5155    0.1194
Pt    0.2457    0.6410    0.0151
Pt    0.1865    0.7448    0.0593
Pt    0.1651    0.6198    0.1176
Pt    0.2110    0.5353    0.1138
Pt    0.0986    0.5121    0.1204
Pt    0.0389    0.4974    0.9975
Pt    0.0843    0.6621    0.1208
Pt    0.0363    0.5344    0.1199
Pt    0.1240    0.7451    0.0780
Pt    0.1229    0.7438    0.9978
Pt    0.0997    0.7437    0.0574
Pt    0.1803    0.7245    0.1178
Pt    0.2069    0.6628    0.1178
Pt    0.1203    0.5357    0.1204
Pt    0.1899    0.5148    0.1150
Pt    0.0368    0.7035    0.9973
Pt    0.9986    0.6832    0.1053
Pt    0.0817    0.7030    0.1188
Pt    0.0189    0.6007    0.9986
Pt    0.1203    0.5784    0.1212
Pt    0.0579    0.5560    0.1177
Pt    0.0391    0.6173    0.1208
Pt    0.1195    0.6205    0.1203
Pt    0.0377    0.5790    0.1195
Pt    0.9971    0.5795    0.0376
Pt    0.2065    0.6206    0.1198
Pt    0.1651    0.6620    0.1189
Pt    0.1020    0.6424    0.1194
Pt    0.0787    0.5343    0.1201
Pt    0.0398    0.6963    0.1207
Pt    0.1000    0.5986    0.1200
Pt    0.1450    0.7236    0.1205
Pt    0.1457    0.7242    0.9969
Pt    0.0803    0.7459    0.9976
Pt    0.2084    0.7464    0.9968
Pt    0.1231    0.7022    0.9982
Pt    0.9967    0.5805    0.9967
Pt    0.9969    0.4969    0.9979
Pt    0.0185    0.5969    0.1214
Pt    0.1619    0.7464    0.1613
Pt    0.2448    0.6199    0.2016
Pt    0.0281    0.5245    0.2129
Pt    0.2255    0.7271    0.2045
Pt    0.2438    0.5365    0.2015
Pt    0.2218    0.7274    0.1638
Pt    0.1859    0.7456    0.1416
Pt    0.1435    0.6823    0.1622
Pt    0.2219    0.6867    0.2022
Pt    0.2254    0.6854    0.1630
Pt    0.1386    0.6403    0.2080
Pt    0.0418    0.5333    0.1596
Pt    0.0394    0.5530    0.2177
Pt    0.0396    0.5776    0.1666
Pt    0.0410    0.5739    0.1983
Pt    0.0360    0.6185    0.1624
Pt    0.0389    0.6181    0.2043
Pt    0.2454    0.4978    0.1592
Pt    0.0360    0.6594    0.1661
Pt    0.0377    0.6600    0.2072
Pt    0.1435    0.6416    0.1619
Pt    0.0372    0.7010    0.1635
Pt    0.0406    0.7022    0.2079
Pt    0.1449    0.5996    0.2034
Pt    0.2448    0.5173    0.1387
Pt    0.1008    0.7461    0.2278
Pt    0.1441    0.6014    0.1629
Pt    0.0802    0.5370    0.1591
Pt    0.0835    0.5347    0.2053
Pt    0.0823    0.5790    0.1620
Pt    0.0815    0.5804    0.2071
Pt    0.0806    0.6183    0.1619
Pt    0.0792    0.6188    0.2019
Pt    0.1415    0.5591    0.2002
Pt    0.0801    0.6606    0.1640
Pt    0.0777    0.6608    0.2018
Pt    0.1430    0.5577    0.1604
Pt    0.0805    0.7044    0.1617
Pt    0.0797    0.7045    0.2055
Pt    0.9974    0.7432    0.2073
Pt    0.0390    0.7440    0.1637
Pt    0.2448    0.5777    0.1618
Pt    0.1394    0.5179    0.2030
Pt    0.1218    0.5367    0.1604
Pt    0.1170    0.5350    0.2053
Pt    0.1257    0.5785    0.1588
Pt    0.1234    0.5781    0.2055
Pt    0.1436    0.5167    0.1577
Pt    0.1226    0.6209    0.1610
Pt    0.1193    0.6198    0.2065
Pt    0.1011    0.7248    0.2053
Pt    0.1226    0.6614    0.1645
Pt    0.1211    0.6633    0.2036
Pt    0.1025    0.7240    0.1627
Pt    0.1212    0.7018    0.1605
Pt    0.1189    0.7030    0.2027
Pt    0.1007    0.6819    0.2037
Pt    0.0089    0.5176    0.2303
Pt    0.9975    0.6824    0.1439
Pt    0.1002    0.6825    0.1616
Pt    0.1675    0.5346    0.1582
Pt    0.1615    0.5375    0.2047
Pt    0.2461    0.6850    0.1406
Pt    0.1659    0.5786    0.1597
Pt    0.1643    0.5779    0.2058
Pt    0.0995    0.6417    0.2019
Pt    0.1631    0.6217    0.1615
Pt    0.1649    0.6212    0.2036
Pt    0.1016    0.6402    0.1645
Pt    0.1634    0.6610    0.1615
Pt    0.1621    0.6660    0.2030
Pt    0.1024    0.5982    0.2051
Pt    0.1605    0.7037    0.1618
Pt    0.1611    0.7083    0.2024
Pt    0.1059    0.5991    0.1635
Pt    0.1224    0.6197    0.2443
Pt    0.0181    0.7246    0.1243
Pt    0.1020    0.5618    0.2055
Pt    0.2038    0.5350    0.1597
Pt    0.2029    0.5384    0.2030
Pt    0.1019    0.5570    0.1615
Pt    0.2045    0.5802    0.1612
Pt    0.2016    0.5801    0.2020
Pt    0.1006    0.5126    0.1622
Pt    0.2022    0.6216    0.1593
Pt    0.2029    0.6225    0.2038
Pt    0.0591    0.7250    0.2068
Pt    0.2051    0.6631    0.1649
Pt    0.2057    0.6644    0.2010
Pt    0.0595    0.7220    0.1622
Pt    0.2047    0.7044    0.1619
Pt    0.2042    0.7051    0.2017
Pt    0.0577    0.6818    0.2038
Pt    0.9964    0.7432    0.1273
Pt    0.0189    0.5566    0.1241
Pt    0.0602    0.6812    0.1641
Pt    0.0199    0.7443    0.1842
Pt    0.2240    0.6428    0.2016
Pt    0.0798    0.7038    0.2461
Pt    0.2248    0.6406    0.1619
Pt    0.2445    0.7263    0.1448
Pt    0.2251    0.4976    0.2237
Pt    0.2243    0.6017    0.2022
Pt    0.2244    0.5996    0.1614
Pt    0.2439    0.6430    0.2220
Pt    0.2223    0.6840    0.2460
Pt    0.2227    0.5588    0.2059
Pt    0.1420    0.7447    0.1404
Pt    0.2222    0.5584    0.1594
Pt    0.2462    0.7081    0.2451
Pt    0.0612    0.6010    0.1226
Pt    0.2239    0.5192    0.2021
Pt    0.2260    0.5169    0.1597
Pt    0.0603    0.6380    0.2028
Pt    0.0796    0.7462    0.1624
Pt    0.2458    0.6838    0.1838
Pt    0.1829    0.7269    0.2040
Pt    0.1842    0.7274    0.1618
Pt    0.0397    0.6605    0.1233
Pt    0.0583    0.6385    0.1629
Pt    0.1825    0.6867    0.2025
Pt    0.1874    0.6834    0.1611
Pt    0.0584    0.5981    0.2053
Pt    0.1805    0.6422    0.2047
Pt    0.1826    0.6426    0.1638
Pt    0.0524    0.5318    0.2072
Pt    0.0397    0.5552    0.1421
Pt    0.0434    0.5502    0.1842
Pt    0.0172    0.5442    0.1965
Pt    0.0390    0.5978    0.1407
Pt    0.0371    0.5991    0.1844
Pt    0.0344    0.5960    0.2222
Pt    0.0368    0.6388    0.1436
Pt    0.0351    0.6390    0.1871
Pt    0.0375    0.6393    0.2240
Pt    0.0393    0.6775    0.1443
Pt    0.0391    0.6800    0.1852
Pt    0.0354    0.6825    0.2294
Pt    0.0374    0.7236    0.1435
Pt    0.0401    0.7254    0.1871
Pt    0.0381    0.7248    0.2253
Pt    0.0797    0.5131    0.1437
Pt    0.0784    0.5573    0.1390
Pt    0.0821    0.5586    0.1823
Pt    0.0811    0.5580    0.2260
Pt    0.0813    0.5983    0.1424
Pt    0.0836    0.5968    0.1834
Pt    0.0803    0.5992    0.2297
Pt    0.0802    0.6398    0.1423
Pt    0.0802    0.6395    0.1823
Pt    0.0785    0.6383    0.2261
Pt    0.0812    0.6843    0.1413
Pt    0.0793    0.6812    0.1831
Pt    0.0803    0.6802    0.2227
Pt    0.0780    0.7260    0.1422
Pt    0.0800    0.7248    0.1809
Pt    0.0809    0.7285    0.2291
Pt    0.1228    0.5153    0.1418
Pt    0.1217    0.5172    0.1806
Pt    0.1199    0.5571    0.1390
Pt    0.1200    0.5574    0.1832
Pt    0.1191    0.5559    0.2275
Pt    0.1240    0.5983    0.1389
Pt    0.1236    0.5955    0.1822
Pt    0.1182    0.6003    0.2251
Pt    0.1228    0.6432    0.1406
Pt    0.1230    0.6414    0.1843
Pt    0.1175    0.6395    0.2272
Pt    0.1219    0.6819    0.1421
Pt    0.1224    0.6823    0.1818
Pt    0.1209    0.6813    0.2258
Pt    0.1214    0.7260    0.1405
Pt    0.1198    0.7270    0.1845
Pt    0.1215    0.7228    0.2250
Pt    0.1684    0.5147    0.1388
Pt    0.1620    0.5149    0.1798
Pt    0.1608    0.5188    0.2238
Pt    0.1658    0.5561    0.1374
Pt    0.1630    0.5550    0.1825
Pt    0.1590    0.5566    0.2238
Pt    0.1627    0.5998    0.1417
Pt    0.1652    0.6021    0.1829
Pt    0.1648    0.6002    0.2278
Pt    0.1626    0.6408    0.1403
Pt    0.1640    0.6425    0.1815
Pt    0.1618    0.6420    0.2297
Pt    0.1649    0.6828    0.1407
Pt    0.1631    0.6832    0.1832
Pt    0.1625    0.6843    0.2244
Pt    0.1623    0.7247    0.1419
Pt    0.1638    0.7269    0.1828
Pt    0.1654    0.7255    0.2256
Pt    0.2070    0.5139    0.1379
Pt    0.2039    0.5140    0.1794
Pt    0.2050    0.5171    0.2233
Pt    0.2057    0.5567    0.1383
Pt    0.2033    0.5601    0.1824
Pt    0.2036    0.5602    0.2241
Pt    0.2044    0.5989    0.1406
Pt    0.2022    0.5998    0.1825
Pt    0.2042    0.6021    0.2246
Pt    0.2028    0.6403    0.1404
Pt    0.2037    0.6421    0.1818
Pt    0.2030    0.6439    0.2221
Pt    0.2039    0.6809    0.1399
Pt    0.2051    0.6850    0.1818
Pt    0.2045    0.6845    0.2238
Pt    0.2040    0.7269    0.1419
Pt    0.2026    0.7279    0.1822
Pt    0.2046    0.7264    0.2245
Pt    0.2448    0.6180    0.1604
Pt    0.0604    0.5991    0.1611
Pt    0.2454    0.6401    0.1816
Pt    0.1827    0.6021    0.2044
Pt    0.1850    0.5982    0.1613
Pt    0.2462    0.5371    0.1623
Pt    0.0635    0.5562    0.2040
Pt    0.1826    0.5563    0.2034
Pt    0.9964    0.6172    0.1222
Pt    0.1846    0.5596    0.1622
Pt    0.0611    0.5574    0.1633
Pt    0.1832    0.5165    0.2040
Pt    0.1846    0.5119    0.1624
Pt    0.0177    0.7224    0.2041
Pt    0.1420    0.7262    0.2041
Pt    0.1414    0.7239    0.1611
Pt    0.0192    0.7225    0.1629
Pt    0.1405    0.6855    0.2035
Pt    0.0169    0.5709    0.2102
Pt    0.0187    0.5784    0.1431
Pt    0.0158    0.5760    0.1820
Pt    0.0176    0.6191    0.1409
Pt    0.0137    0.6173    0.1824
Pt    0.0130    0.6181    0.2247
Pt    0.0146    0.6581    0.1439
Pt    0.0156    0.6571    0.1867
Pt    0.0164    0.6595    0.2276
Pt    0.0195    0.7022    0.1417
Pt    0.0194    0.7006    0.1863
Pt    0.0148    0.7020    0.2245
Pt    0.1216    0.6647    0.1219
Pt    0.1424    0.7445    0.2240
Pt    0.0580    0.7465    0.1840
Pt    0.0589    0.5368    0.1387
Pt    0.0639    0.5323    0.1805
Pt    0.0562    0.5777    0.1392
Pt    0.0619    0.5797    0.1827
Pt    0.0570    0.5761    0.2217
Pt    0.0562    0.6213    0.1424
Pt    0.0595    0.6178    0.1813
Pt    0.0593    0.6173    0.2243
Pt    0.0611    0.6596    0.1430
Pt    0.0585    0.6595    0.1825
Pt    0.0586    0.6589    0.2235
Pt    0.0597    0.7017    0.1427
Pt    0.0582    0.7023    0.1849
Pt    0.0603    0.7048    0.2286
Pt    0.0185    0.7467    0.2284
Pt    0.0183    0.6779    0.1253
Pt    0.2436    0.6835    0.2266
Pt    0.1008    0.5336    0.1421
Pt    0.0999    0.5308    0.1829
Pt    0.1013    0.5780    0.1416
Pt    0.1024    0.5776    0.1820
Pt    0.1019    0.5802    0.2288
Pt    0.1000    0.6187    0.1420
Pt    0.1013    0.6192    0.1827
Pt    0.1005    0.6191    0.2260
Pt    0.1012    0.6606    0.1437
Pt    0.1026    0.6623    0.1848
Pt    0.0981    0.6595    0.2249
Pt    0.0996    0.7039    0.1408
Pt    0.1018    0.7047    0.1829
Pt    0.1001    0.7045    0.2264
Pt    0.2462    0.6627    0.2057
Pt    0.0588    0.7222    0.1234
Pt    0.1822    0.5142    0.2425
Pt    0.1411    0.5378    0.1396
Pt    0.1427    0.5359    0.1791
Pt    0.1387    0.5377    0.2260
Pt    0.1452    0.5784    0.1402
Pt    0.1467    0.5781    0.1806
Pt    0.1424    0.5798    0.2247
Pt    0.1414    0.6219    0.1389
Pt    0.1438    0.6215    0.1813
Pt    0.1431    0.6202    0.2243
Pt    0.1435    0.6628    0.1410
Pt    0.1435    0.6619    0.1841
Pt    0.1423    0.6628    0.2244
Pt    0.1414    0.7038    0.1398
Pt    0.1396    0.7046    0.1824
Pt    0.1381    0.7017    0.2258
Pt    0.0557    0.7448    0.1426
Pt    0.9971    0.6778    0.1865
Pt    0.2280    0.7276    0.2442
Pt    0.1874    0.5338    0.1370
Pt    0.1837    0.5352    0.1811
Pt    0.1822    0.5388    0.2252
Pt    0.1870    0.5751    0.1374
Pt    0.1810    0.5761    0.1849
Pt    0.1844    0.5812    0.2258
Pt    0.1835    0.6203    0.1386
Pt    0.1854    0.6210    0.1819
Pt    0.1819    0.6226    0.2283
Pt    0.1837    0.6621    0.1407
Pt    0.1825    0.6654    0.1834
Pt    0.1836    0.6657    0.2224
Pt    0.1817    0.7055    0.1431
Pt    0.1832    0.7053    0.1815
Pt    0.1861    0.7054    0.2241
Pt    0.9964    0.5775    0.1221
Pt    0.9980    0.7240    0.2264
Pt    0.1418    0.5999    0.2451
Pt    0.2270    0.5376    0.1377
Pt    0.2230    0.5406    0.1841
Pt    0.2240    0.5383    0.2260
Pt    0.2258    0.5792    0.1402
Pt    0.2254    0.5745    0.1829
Pt    0.2237    0.5811    0.2231
Pt    0.2248    0.6203    0.1422
Pt    0.2222    0.6205    0.1815
Pt    0.2233    0.6240    0.2242
Pt    0.2245    0.6625    0.1426
Pt    0.2272    0.6628    0.1824
Pt    0.2232    0.6630    0.2244
Pt    0.2264    0.7053    0.1434
Pt    0.2239    0.7089    0.1826
Pt    0.2257    0.7065    0.2269
Pt    0.2459    0.7059    0.1649
Pt    0.0776    0.6594    0.2463
Pt    0.2434    0.5966    0.1810
Pt    0.0349    0.5223    0.1871
Pt    0.0160    0.6785    0.2052
Pt    0.0213    0.5517    0.1707
Pt    0.0178    0.5957    0.1627
Pt    0.0153    0.6003    0.2017
Pt    0.0154    0.6396    0.1650
Pt    0.0157    0.6374    0.2068
Pt    0.0145    0.6795    0.1638
Pt    0.1621    0.6629    0.2461
Pt    0.1206    0.7443    0.1633
Pt    0.2458    0.6649    0.1613
Pt    0.0634    0.6797    0.1232
Pt    0.9975    0.7034    0.1234
Pt    0.2450    0.7271    0.1864
Pt    0.2238    0.6437    0.2446
Pt    0.0977    0.7280    0.1232
Pt    0.1002    0.7465    0.1851
Pt    0.2052    0.6240    0.2447
Pt    0.0552    0.6387    0.2460
Pt    0.1856    0.6407    0.1219
Pt    0.0600    0.7458    0.2261
Pt    0.0605    0.6380    0.1224
Pt    0.1614    0.7456    0.2026
Pt    0.1829    0.6850    0.2422
Pt    0.0193    0.7447    0.1448
Pt    0.9973    0.7412    0.1636
Pt    0.0804    0.6221    0.2458
Pt    0.9976    0.7014    0.1682
Pt    0.2432    0.6624    0.2446
Pt    0.1833    0.5604    0.2457
Pt    0.2032    0.7059    0.1217
Pt    0.0355    0.5023    0.2285
Pt    0.2241    0.5180    0.2454
Pt    0.0356    0.6174    0.2429
Pt    0.2036    0.5388    0.2466
Pt    0.2454    0.7026    0.2079
Pt    0.2244    0.7256    0.1229
Pt    0.9970    0.6603    0.1225
Pt    0.2444    0.5783    0.2034
Pt    0.2236    0.6019    0.2428
Pt    0.0595    0.6819    0.2425
Pt    0.1407    0.5588    0.2451
Pt    0.2448    0.6208    0.2426
Pt    0.1233    0.5819    0.2451
Pt    0.1418    0.6403    0.2458
Pt    0.2433    0.5989    0.2249
Pt    0.0158    0.6391    0.1221
Pt    0.1603    0.7065    0.2451
Pt    0.1848    0.7282    0.2447
Pt    0.2020    0.6649    0.2464
Pt    0.1833    0.6454    0.2459
Pt    0.1201    0.6633    0.2457
Pt    0.2454    0.4968    0.2458
Pt    0.0381    0.7073    0.2465
Pt    0.9998    0.7016    0.2903
Pt    0.9989    0.7041    0.2493
Pt    0.0017    0.6386    0.3109
Pt    0.9970    0.6416    0.2704
Pt    0.1593    0.4993    0.3311
Pt    0.1009    0.7253    0.2502
Pt    0.1390    0.4970    0.3509
Pt    0.0402    0.7438    0.2488
Pt    0.0006    0.6593    0.3324
Pt    0.2233    0.7285    0.2899
Pt    0.2423    0.7269    0.3116
Pt    0.2250    0.4979    0.2655
Pt    0.0427    0.6597    0.2891
Pt    0.0362    0.6605    0.3319
Pt    0.0367    0.7035    0.2910
Pt    0.0374    0.7034    0.3333
Pt    0.1225    0.7439    0.2915
Pt    0.2435    0.6856    0.3525
Pt    0.9966    0.7438    0.2530
Pt    0.0798    0.6198    0.2852
Pt    0.0774    0.6222    0.3287
Pt    0.9996    0.7216    0.2703
Pt    0.0785    0.6634    0.2880
Pt    0.0787    0.6638    0.3318
Pt    0.2032    0.4969    0.2898
Pt    0.0797    0.7031    0.2898
Pt    0.0755    0.7041    0.3323
Pt    0.2440    0.6431    0.2659
Pt    0.2043    0.7072    0.2472
Pt    0.9988    0.7221    0.3551
Pt    0.0977    0.7463    0.3537
Pt    0.1193    0.6222    0.2886
Pt    0.1185    0.6193    0.3310
Pt    0.2461    0.6011    0.2658
Pt    0.1202    0.6633    0.2886
Pt    0.1183    0.6626    0.3313
Pt    0.0585    0.7461    0.3130
Pt    0.1216    0.7069    0.2907
Pt    0.1187    0.7031    0.3327
Pt    0.0185    0.7438    0.3115
Pt    0.1818    0.4971    0.3540
Pt    0.2424    0.5392    0.2891
Pt    0.2459    0.5622    0.3486
Pt    0.1586    0.5376    0.2877
Pt    0.1593    0.5378    0.3269
Pt    0.1384    0.4993    0.3090
Pt    0.1609    0.5804    0.2879
Pt    0.1631    0.5794    0.3293
Pt    0.9972    0.7459    0.3321
Pt    0.1611    0.6219    0.2876
Pt    0.1616    0.6206    0.3302
Pt    1.0000    0.6186    0.3301
Pt    0.1631    0.6630    0.2882
Pt    0.1601    0.6612    0.3319
Pt    0.1806    0.5184    0.3312
Pt    0.1649    0.7064    0.2882
Pt    0.1643    0.7052    0.3311
Pt    0.1819    0.5163    0.2877
Pt    0.1386    0.4985    0.2707
Pt    0.2249    0.5182    0.2893
Pt    0.0014    0.6411    0.3527
Pt    0.2035    0.5354    0.2878
Pt    0.2028    0.5382    0.3319
Pt    0.2447    0.6440    0.3095
Pt    0.2035    0.5823    0.2884
Pt    0.1995    0.5806    0.3284
Pt    0.0020    0.6841    0.3570
Pt    0.2063    0.6250    0.2867
Pt    0.2031    0.6204    0.3294
Pt    0.1175    0.5003    0.3314
Pt    0.2030    0.6650    0.2863
Pt    0.2035    0.6633    0.3321
Pt    0.9973    0.7454    0.2898
Pt    0.2042    0.7082    0.2880
Pt    0.2032    0.7036    0.3305
Pt    0.9992    0.6799    0.3115
Pt    0.2449    0.5595    0.2686
Pt    0.2436    0.6861    0.3095
Pt    0.2444    0.7046    0.3304
Pt    0.1440    0.6438    0.2890
Pt    0.1844    0.5587    0.2871
Pt    0.1381    0.5997    0.3279
Pt    0.1344    0.5966    0.2887
Pt    0.1001    0.7434    0.3123
Pt    0.1390    0.5575    0.3277
Pt    0.1848    0.4980    0.2656
Pt    0.2457    0.5191    0.2693
Pt    0.0172    0.6804    0.2473
Pt    0.1399    0.5200    0.3251
Pt    0.2223    0.5609    0.2908
Pt    0.2222    0.6433    0.3294
Pt    0.0597    0.7450    0.2700
Pt    0.1419    0.7265    0.3323
Pt    0.2271    0.6453    0.2889
Pt    0.2227    0.6850    0.3299
Pt    0.2235    0.6886    0.2874
Pt    0.2266    0.6037    0.3303
Pt    0.0157    0.7457    0.3536
Pt    0.2027    0.6202    0.3707
Pt    0.2238    0.6028    0.2881
Pt    0.0781    0.6185    0.3703
Pt    0.9971    0.7026    0.3325
Pt    0.2217    0.7465    0.3520
Pt    0.0166    0.7259    0.2475
Pt    0.0404    0.7449    0.2917
Pt    0.1432    0.7241    0.2879
Pt    0.2448    0.5407    0.3287
Pt    0.2222    0.7290    0.3314
Pt    0.0367    0.5990    0.3515
Pt    0.0357    0.6380    0.3493
Pt    0.0396    0.6812    0.2683
Pt    0.0381    0.6811    0.3125
Pt    0.0377    0.7237    0.2713
Pt    0.0391    0.7237    0.3139
Pt    0.0968    0.6010    0.3252
Pt    0.0782    0.6410    0.2677
Pt    0.0747    0.6385    0.3052
Pt    0.0754    0.6404    0.3533
Pt    0.0774    0.6834    0.2676
Pt    0.0799    0.6859    0.3118
Pt    0.0742    0.6845    0.3545
Pt    0.0798    0.7224    0.2687
Pt    0.0790    0.7252    0.3132
Pt    0.0785    0.7266    0.3561
Pt    0.1188    0.5999    0.2664
Pt    0.1176    0.6022    0.3098
Pt    0.1218    0.6454    0.2680
Pt    0.1182    0.6436    0.3090
Pt    0.1177    0.6410    0.3492
Pt    0.1199    0.6828    0.2697
Pt    0.1196    0.6821    0.3082
Pt    0.1170    0.6811    0.3517
Pt    0.1208    0.7262    0.2671
Pt    0.1207    0.7245    0.3136
Pt    0.1189    0.7278    0.3522
Pt    0.1620    0.5160    0.2672
Pt    0.1608    0.5173    0.3076
Pt    0.1602    0.5173    0.3540
Pt    0.1619    0.5564    0.2636
Pt    0.1600    0.5565    0.3072
Pt    0.1598    0.5564    0.3481
Pt    0.1568    0.5990    0.2676
Pt    0.1598    0.6013    0.3069
Pt    0.1581    0.5992    0.3477
Pt    0.1631    0.6429    0.2657
Pt    0.1604    0.6404    0.3108
Pt    0.1621    0.6423    0.3518
Pt    0.1614    0.6865    0.2663
Pt    0.1629    0.6819    0.3143
Pt    0.1613    0.6829    0.3502
Pt    0.1654    0.7282    0.2665
Pt    0.1599    0.7245    0.3103
Pt    0.1636    0.7233    0.3568
Pt    0.2041    0.5184    0.2673
Pt    0.2013    0.5175    0.3115
Pt    0.2027    0.5146    0.3501
Pt    0.2063    0.5577    0.2700
Pt    0.2016    0.5581    0.3108
Pt    0.2021    0.5605    0.3489
Pt    0.2039    0.5989    0.2655
Pt    0.2028    0.6029    0.3059
Pt    0.2018    0.6003    0.3483
Pt    0.2039    0.6416    0.2658
Pt    0.2029    0.6431    0.3077
Pt    0.2043    0.6422    0.3503
Pt    0.2041    0.6873    0.2673
Pt    0.2020    0.6838    0.3074
Pt    0.2062    0.6861    0.3529
Pt    0.2044    0.7292    0.2682
Pt    0.2019    0.7270    0.3096
Pt    0.2023    0.7245    0.3516
Pt    0.0989    0.7237    0.3313
Pt    0.9993    0.7228    0.3112
Pt    0.2453    0.6656    0.2875
Pt    0.2233    0.5152    0.3307
Pt    0.1633    0.7463    0.2868
Pt    0.1836    0.6813    0.3701
Pt    0.2437    0.7082    0.2881
Pt    0.0990    0.4991    0.3534
Pt    0.0358    0.7441    0.3332
Pt    0.2425    0.5810    0.2872
Pt    0.0978    0.7276    0.2894
Pt    0.0173    0.5954    0.3704
Pt    0.1386    0.6824    0.3311
Pt    0.1006    0.6430    0.2507
Pt    0.1835    0.6852    0.2856
Pt    0.1850    0.6833    0.3312
Pt    0.2236    0.5623    0.3305
Pt    0.1633    0.7442    0.3312
Pt    0.0173    0.6199    0.3520
Pt    0.0188    0.6592    0.2689
Pt    0.0217    0.6582    0.3083
Pt    0.0212    0.6638    0.3551
Pt    0.0200    0.6990    0.2683
Pt    0.0187    0.7023    0.3126
Pt    0.9994    0.6581    0.2916
Pt    0.1426    0.6829    0.2894
Pt    0.0998    0.6833    0.3308
Pt    0.0573    0.6195    0.3494
Pt    0.0581    0.6609    0.2655
Pt    0.0606    0.6623    0.3101
Pt    0.0567    0.6621    0.3521
Pt    0.0574    0.7014    0.2668
Pt    0.0577    0.7030    0.3103
Pt    0.1997    0.5809    0.3709
Pt    0.2429    0.6871    0.2664
Pt    0.1387    0.5986    0.3700
Pt    0.1192    0.5971    0.3486
Pt    0.1006    0.6225    0.2666
Pt    0.0978    0.6242    0.3084
Pt    0.0971    0.6191    0.3488
Pt    0.0973    0.6636    0.2674
Pt    0.0974    0.6618    0.3110
Pt    0.0956    0.6625    0.3553
Pt    0.1016    0.7062    0.2722
Pt    0.0997    0.7054    0.3081
Pt    0.0977    0.7026    0.3520
Pt    0.0994    0.6815    0.2903
Pt    0.0959    0.6436    0.3325
Pt    0.1007    0.6415    0.2873
Pt    0.1398    0.5360    0.2657
Pt    0.1397    0.5376    0.3465
Pt    0.1378    0.5778    0.2667
Pt    0.1407    0.5779    0.3105
Pt    0.1388    0.5777    0.3473
Pt    0.1389    0.6188    0.2713
Pt    0.1392    0.6215    0.3081
Pt    0.1392    0.6195    0.3495
Pt    0.1432    0.6630    0.2686
Pt    0.1421    0.6617    0.3091
Pt    0.1386    0.6605    0.3514
Pt    0.1399    0.7035    0.2705
Pt    0.1417    0.7027    0.3109
Pt    0.1416    0.7050    0.3530
Pt    0.1401    0.6402    0.3309
Pt    0.0992    0.6003    0.2889
Pt    0.1427    0.6822    0.2474
Pt    0.1816    0.5373    0.2664
Pt    0.1804    0.5390    0.3091
Pt    0.1821    0.5372    0.3526
Pt    0.1833    0.5777    0.2688
Pt    0.1819    0.5786    0.3065
Pt    0.1812    0.5780    0.3504
Pt    0.1854    0.6208    0.2638
Pt    0.1828    0.6222    0.3064
Pt    0.1798    0.6204    0.3499
Pt    0.1836    0.6640    0.2681
Pt    0.1838    0.6626    0.3067
Pt    0.1820    0.6624    0.3501
Pt    0.1823    0.7068    0.2662
Pt    0.1837    0.7054    0.3070
Pt    0.1849    0.7037    0.3525
Pt    0.1833    0.6430    0.3317
Pt    0.1818    0.6415    0.2856
Pt    0.1844    0.7280    0.2872
Pt    0.2248    0.5372    0.2689
Pt    0.2234    0.5372    0.3101
Pt    0.2265    0.5374    0.3495
Pt    0.2239    0.5807    0.2645
Pt    0.2228    0.5840    0.3100
Pt    0.2241    0.5800    0.3525
Pt    0.2254    0.6223    0.2664
Pt    0.2245    0.6245    0.3075
Pt    0.2240    0.6217    0.3511
Pt    0.2251    0.6662    0.2668
Pt    0.2242    0.6658    0.3075
Pt    0.2231    0.6661    0.3517
Pt    0.2255    0.7066    0.2639
Pt    0.2242    0.7067    0.3099
Pt    0.2237    0.7068    0.3523
Pt    0.9967    0.6609    0.2487
Pt    0.1783    0.6009    0.3267
Pt    0.1815    0.5591    0.3307
Pt    0.1795    0.6009    0.2840
Pt    0.0269    0.6317    0.3230
Pt    0.1850    0.7251    0.3287
Pt    0.0215    0.6784    0.2887
Pt    0.0189    0.6831    0.3342
Pt    0.0189    0.7242    0.2925
Pt    0.0178    0.7233    0.3340
Pt    0.0760    0.5996    0.3463
Pt    0.1416    0.7430    0.3536
Pt    0.0571    0.6387    0.3269
Pt    0.1598    0.6198    0.2487
Pt    0.0562    0.6839    0.2913
Pt    0.0576    0.6811    0.3321
Pt    0.0583    0.7245    0.2940
Pt    0.0576    0.7242    0.3355
Pt    0.1597    0.4967    0.2865
Pt    0.1218    0.7042    0.2488
Pt    0.2257    0.5167    0.3711
Pt    0.2450    0.6216    0.2880
Pt    0.2248    0.5582    0.3685
Pt    0.2446    0.5170    0.3104
Pt    0.0163    0.7458    0.2710
Pt    0.9993    0.6802    0.2702
Pt    0.0766    0.7442    0.3360
Pt    0.0610    0.7248    0.2482
Pt    0.2449    0.5635    0.3082
Pt    0.1827    0.5972    0.2480
Pt    0.0530    0.6414    0.3714
Pt    0.1218    0.7454    0.3327
Pt    0.0169    0.6393    0.2481
Pt    0.2425    0.6608    0.3301
Pt    0.2441    0.6020    0.3075
Pt    0.1403    0.7453    0.3110
Pt    0.1422    0.7447    0.2689
Pt    0.2449    0.6235    0.3280
Pt    0.0588    0.5981    0.3691
Pt    0.2452    0.7291    0.3514
Pt    0.2451    0.5811    0.3283
Pt    0.0982    0.5983    0.2499
Pt    0.0374    0.6596    0.2476
Pt    0.1378    0.5165    0.2467
Pt    0.2461    0.5386    0.3698
Pt    0.1604    0.5793    0.3691
Pt    0.1398    0.6391    0.3698
Pt    0.2041    0.6620    0.3707
Pt    0.1612    0.6214    0.3709
Pt    0.2285    0.6447    0.3691
Pt    0.1807    0.6007    0.3680
Pt    0.2069    0.5383    0.3662
Pt    0.1209    0.5005    0.3701
Pt    0.1387    0.6813    0.3712
Pt    0.1029    0.6851    0.2476
Pt    0.1600    0.5336    0.2469
Pt    0.2041    0.5774    0.2478
Pt    0.1617    0.5792    0.2474
Pt    0.1412    0.7254    0.2467
Pt    0.2461    0.5804    0.2468
Pt    0.2252    0.5568    0.2467
Pt    0.1814    0.5621    0.3744
Pt    0.2050    0.4983    0.4543
Pt    0.2227    0.7260    0.4548
Pt    0.0798    0.4990    0.3735
Pt    0.2250    0.7267    0.4130
Pt    0.9967    0.6401    0.3999
Pt    0.2441    0.7289    0.3932
Pt    0.1199    0.6614    0.3718
Pt    0.9991    0.6188    0.4152
Pt    0.2239    0.6848    0.4544
Pt    0.0371    0.5389    0.4129
Pt    0.0378    0.5350    0.4552
Pt    0.1838    0.4986    0.4746
Pt    0.0382    0.5770    0.4140
Pt    0.0363    0.5754    0.4500
Pt    0.1395    0.4994    0.3936
Pt    0.0386    0.6169    0.4102
Pt    0.2266    0.6422    0.4116
Pt    0.0814    0.5401    0.4579
Pt    0.9973    0.5562    0.4333
Pt    0.0559    0.5025    0.3890
Pt    0.1850    0.4995    0.4337
Pt    0.1185    0.5432    0.4535
Pt    0.0577    0.4970    0.4734
Pt    0.1646    0.4981    0.4565
Pt    0.0992    0.4983    0.4769
Pt    0.1814    0.6427    0.3726
Pt    0.1439    0.4985    0.4767
Pt    0.1597    0.5425    0.4110
Pt    0.1599    0.5391    0.4575
Pt    0.9993    0.5988    0.4744
Pt    0.1583    0.5825    0.4101
Pt    0.1607    0.5836    0.4529
Pt    0.0996    0.7462    0.3970
Pt    0.1609    0.6206    0.4100
Pt    0.1597    0.6199    0.4518
Pt    0.0803    0.4993    0.4544
Pt    0.1610    0.6610    0.4137
Pt    0.1606    0.6598    0.4496
Pt    0.1186    0.7017    0.3728
Pt    0.1626    0.7053    0.4177
Pt    0.1601    0.7045    0.4510
Pt    0.2274    0.4992    0.4749
Pt    0.2434    0.7273    0.4343
Pt    0.1000    0.5019    0.3935
Pt    0.2037    0.4990    0.4118
Pt    0.2037    0.5400    0.4123
Pt    0.2012    0.5400    0.4524
Pt    0.1200    0.4989    0.4148
Pt    0.2029    0.5791    0.4123
Pt    0.2035    0.5796    0.4532
Pt    0.2456    0.7083    0.3719
Pt    0.2030    0.6228    0.4124
Pt    0.2027    0.6207    0.4543
Pt    0.1023    0.4979    0.4355
Pt    0.2031    0.6630    0.4129
Pt    0.2043    0.6616    0.4550
Pt    0.2047    0.4989    0.3737
Pt    0.2043    0.7047    0.4145
Pt    0.2039    0.7051    0.4548
Pt    0.1404    0.7237    0.3750
Pt    0.9990    0.5772    0.4582
Pt    0.1800    0.4984    0.3948
Pt    0.2222    0.6015    0.4537
Pt    0.0997    0.6386    0.3745
Pt    0.1616    0.4974    0.3726
Pt    0.0474    0.7429    0.4814
Pt    0.9975    0.6009    0.4354
Pt    0.1431    0.4979    0.4349
Pt    0.9991    0.5579    0.3902
Pt    0.2447    0.7061    0.4138
Pt    0.1608    0.6631    0.3720
Pt    0.9969    0.5374    0.4560
Pt    0.1621    0.7028    0.3741
Pt    0.0409    0.7463    0.4558
Pt    0.0775    0.6646    0.3756
Pt    0.2262    0.6851    0.4952
Pt    0.0380    0.4970    0.4531
Pt    0.0772    0.7433    0.3788
Pt    0.2228    0.6015    0.4096
Pt    0.1441    0.7466    0.3942
Pt    0.2249    0.5584    0.4529
Pt    0.2262    0.6818    0.4145
Pt    0.2427    0.6438    0.4349
Pt    0.2443    0.7287    0.4755
Pt    0.1406    0.5623    0.4947
Pt    0.9968    0.5988    0.3942
Pt    0.0598    0.4976    0.4344
Pt    0.2026    0.7054    0.3746
Pt    0.2450    0.5784    0.4543
Pt    0.2237    0.6403    0.4527
Pt    0.1023    0.7281    0.3757
Pt    0.1382    0.6026    0.4938
Pt    0.0368    0.5145    0.4320
Pt    0.0375    0.5155    0.4764
Pt    0.0367    0.5541    0.4341
Pt    0.0378    0.5543    0.4768
Pt    0.0435    0.5956    0.3929
Pt    0.0386    0.6394    0.3936
Pt    0.0787    0.5200    0.4356
Pt    0.0790    0.5177    0.4749
Pt    0.0806    0.5628    0.4772
Pt    0.0991    0.6587    0.3932
Pt    0.1188    0.5223    0.4357
Pt    0.1214    0.5161    0.4747
Pt    0.1200    0.5624    0.4340
Pt    0.1188    0.5638    0.4762
Pt    0.1194    0.6817    0.3974
Pt    0.1200    0.7239    0.3954
Pt    0.1610    0.5184    0.3937
Pt    0.1584    0.5226    0.4308
Pt    0.1621    0.5194    0.4780
Pt    0.1582    0.5621    0.3923
Pt    0.1607    0.5605    0.4350
Pt    0.1618    0.5615    0.4749
Pt    0.1618    0.6002    0.3881
Pt    0.1585    0.5996    0.4314
Pt    0.1597    0.6043    0.4747
Pt    0.1597    0.6424    0.3922
Pt    0.1598    0.6398    0.4315
Pt    0.1619    0.6428    0.4760
Pt    0.1619    0.6806    0.3935
Pt    0.1586    0.6827    0.4331
Pt    0.1610    0.6867    0.4749
Pt    0.1608    0.7250    0.3975
Pt    0.1611    0.7279    0.4351
Pt    0.1651    0.7248    0.4746
Pt    0.2045    0.5204    0.3925
Pt    0.2060    0.5193    0.4344
Pt    0.2056    0.5190    0.4735
Pt    0.2041    0.5612    0.3915
Pt    0.2023    0.5605    0.4319
Pt    0.2043    0.5614    0.4725
Pt    0.2025    0.6024    0.3901
Pt    0.2049    0.6001    0.4323
Pt    0.2037    0.5987    0.4748
Pt    0.2064    0.6437    0.3912
Pt    0.2050    0.6404    0.4333
Pt    0.2034    0.6433    0.4747
Pt    0.2050    0.6863    0.3949
Pt    0.2020    0.6817    0.4332
Pt    0.2057    0.6869    0.4770
Pt    0.2003    0.7255    0.3940
Pt    0.2016    0.7250    0.4347
Pt    0.2036    0.7262    0.4761
Pt    0.0336    0.7434    0.3768
Pt    0.1406    0.6846    0.4938
Pt    0.1834    0.5982    0.4949
Pt    0.0182    0.4970    0.4766
Pt    0.2452    0.5991    0.4308
Pt    0.1400    0.7456    0.4381
Pt    0.1809    0.7246    0.3759
Pt    0.1150    0.6153    0.4854
Pt    0.0364    0.6151    0.3737
Pt    0.1611    0.5402    0.3722
Pt    0.0941    0.6004    0.4894
Pt    0.2458    0.5598    0.3888
Pt    0.0976    0.6839    0.3751
Pt    0.0798    0.5020    0.4144
Pt    0.2441    0.5392    0.4119
Pt    0.0191    0.6394    0.3738
Pt    0.1821    0.5988    0.4517
Pt    0.1809    0.6020    0.4121
Pt    0.0195    0.5367    0.3936
Pt    0.0181    0.5344    0.4361
Pt    0.0179    0.5362    0.4759
Pt    0.0172    0.5820    0.3951
Pt    0.0156    0.5766    0.4330
Pt    0.0189    0.5749    0.4748
Pt    0.0177    0.6166    0.3927
Pt    0.1840    0.7278    0.4534
Pt    0.0596    0.5388    0.4342
Pt    0.0586    0.5374    0.4766
Pt    0.0580    0.5781    0.4785
Pt    0.0582    0.6205    0.3886
Pt    0.0756    0.6400    0.3904
Pt    0.0943    0.5436    0.4332
Pt    0.1005    0.5394    0.4768
Pt    0.1230    0.5849    0.4544
Pt    0.1015    0.7026    0.3936
Pt    0.1823    0.7262    0.4141
Pt    0.1424    0.5390    0.3911
Pt    0.1402    0.5408    0.4341
Pt    0.1388    0.5409    0.4753
Pt    0.1368    0.5846    0.3935
Pt    0.1394    0.5832    0.4331
Pt    0.1414    0.5809    0.4738
Pt    0.1404    0.6178    0.3898
Pt    0.1391    0.6225    0.4704
Pt    0.1399    0.6626    0.3946
Pt    0.1356    0.6602    0.4315
Pt    0.1399    0.6653    0.4730
Pt    0.1411    0.7021    0.3930
Pt    0.1823    0.5593    0.4529
Pt    0.1808    0.5609    0.4105
Pt    0.2237    0.5601    0.4092
Pt    0.1841    0.5407    0.3905
Pt    0.1788    0.5406    0.4331
Pt    0.1831    0.5386    0.4770
Pt    0.1807    0.5814    0.3924
Pt    0.1824    0.5806    0.4305
Pt    0.1818    0.5778    0.4743
Pt    0.1801    0.6226    0.3913
Pt    0.1811    0.6203    0.4330
Pt    0.1834    0.6229    0.4783
Pt    0.1838    0.6617    0.3927
Pt    0.1836    0.6621    0.4363
Pt    0.1786    0.6637    0.4725
Pt    0.1816    0.7032    0.3954
Pt    0.1830    0.7037    0.4352
Pt    0.1847    0.7062    0.4750
Pt    0.2208    0.7264    0.3742
Pt    0.1385    0.6411    0.4924
Pt    0.2449    0.6031    0.4742
Pt    0.2269    0.5386    0.3881
Pt    0.2256    0.5396    0.4311
Pt    0.2232    0.5407    0.4714
Pt    0.2246    0.5798    0.3895
Pt    0.2260    0.5766    0.4328
Pt    0.2267    0.5819    0.4748
Pt    0.2228    0.6240    0.3905
Pt    0.2248    0.6209    0.4318
Pt    0.2248    0.6223    0.4767
Pt    0.2278    0.6635    0.3912
Pt    0.2231    0.6637    0.4358
Pt    0.2268    0.6644    0.4733
Pt    0.2242    0.7067    0.3931
Pt    0.2248    0.7039    0.4346
Pt    0.2234    0.7072    0.4770
Pt    0.1824    0.5185    0.4515
Pt    0.2283    0.5192    0.4526
Pt    0.2267    0.5162    0.4126
Pt    0.0175    0.5150    0.4121
Pt    0.0175    0.5161    0.4554
Pt    0.9965    0.6172    0.3730
Pt    0.0166    0.5583    0.4125
Pt    0.0172    0.5556    0.4540
Pt    0.0123    0.7378    0.4620
Pt    0.0203    0.6004    0.4157
Pt    0.0187    0.5947    0.4534
Pt    0.1810    0.6838    0.4533
Pt    0.1837    0.5205    0.4135
Pt    0.0602    0.5185    0.4140
Pt    0.0592    0.5197    0.4551
Pt    0.2456    0.4984    0.4547
Pt    0.0588    0.5584    0.4537
Pt    0.2264    0.6443    0.4942
Pt    0.1824    0.6800    0.4138
Pt    0.1010    0.5200    0.4152
Pt    0.1003    0.5208    0.4558
Pt    0.0799    0.6232    0.4949
Pt    0.0997    0.5650    0.4565
Pt    0.0408    0.5768    0.3735
Pt    0.9966    0.5150    0.4322
Pt    0.1819    0.6409    0.4548
Pt    0.1216    0.6405    0.3920
Pt    0.1338    0.5207    0.4139
Pt    0.1417    0.5188    0.4542
Pt    0.1841    0.6423    0.4129
Pt    0.1387    0.5617    0.4132
Pt    0.1395    0.5614    0.4541
Pt    0.2448    0.7057    0.4548
Pt    0.1373    0.6046    0.4134
Pt    0.1357    0.6094    0.4452
Pt    0.2251    0.6868    0.3746
Pt    0.1362    0.6337    0.4191
Pt    0.1354    0.6390    0.4494
Pt    0.2438    0.6859    0.4743
Pt    0.1401    0.6848    0.4145
Pt    0.2267    0.5232    0.4931
Pt    0.1388    0.7240    0.4173
Pt    0.1425    0.7274    0.4610
Pt    0.2049    0.5431    0.4951
Pt    0.2246    0.4970    0.4325
Pt    0.1426    0.7261    0.4949
Pt    0.2446    0.6422    0.4731
Pt    0.2431    0.6208    0.4532
Pt    0.9994    0.5355    0.4127
Pt    0.2031    0.6204    0.4940
Pt    0.2061    0.6650    0.4942
Pt    0.2270    0.5598    0.4956
Pt    0.9969    0.5159    0.4762
Pt    0.1823    0.5182    0.3736
Pt    0.1013    0.6400    0.4928
Pt    0.2454    0.6213    0.4118
Pt    0.2046    0.5773    0.4953
Pt    0.1622    0.5811    0.4934
Pt    0.9995    0.6604    0.3740
Pt    0.1166    0.5832    0.4929
Pt    0.1634    0.6641    0.4947
Pt    0.1608    0.5414    0.4952
Pt    0.1179    0.6609    0.4914
Pt    0.1197    0.5409    0.4961
Pt    0.1630    0.7460    0.4959
Pt    0.0591    0.5167    0.4958
Pt    0.2065    0.4994    0.4951
Pt    0.1870    0.5180    0.4955
Pt    0.2447    0.4984    0.4953
Pt    0.9983    0.5806    0.4961
Pt    0.0180    0.6005    0.4962
Pt    0.2051    0.7071    0.4965
Pt    0.0822    0.5377    0.4946
Pt    0.1840    0.5604    0.4962
Pt    0.2450    0.6206    0.3716
Pt    0.2246    0.6031    0.3731
Pt    0.1408    0.5187    0.3727
Pt    0.1155    0.6142    0.3728
Pt    0.0809    0.7063    0.3732
Pt    0.2249    0.6033    0.4966
Pt    0.2244    0.7289    0.5797
Pt    0.9984    0.5568    0.6028
Pt    0.0988    0.5608    0.4987
Pt    0.2257    0.7279    0.5398
Pt    0.2267    0.6869    0.5803
Pt    0.2227    0.6850    0.5381
Pt    0.0409    0.5378    0.5399
Pt    0.0381    0.5326    0.5807
Pt    0.0390    0.5818    0.5393
Pt    0.0395    0.5792    0.5814
Pt    0.0328    0.6195    0.5405
Pt    0.0324    0.6214    0.5760
Pt    0.0411    0.6628    0.5389
Pt    0.0357    0.6667    0.5768
Pt    0.0520    0.7068    0.5310
Pt    0.0361    0.7040    0.5799
Pt    0.0780    0.5364    0.5390
Pt    0.0790    0.5362    0.5814
Pt    0.0789    0.5828    0.5370
Pt    0.0796    0.5803    0.5799
Pt    0.0780    0.6211    0.5374
Pt    0.0799    0.6214    0.5775
Pt    0.0803    0.6655    0.5338
Pt    0.0802    0.6633    0.5762
Pt    0.0789    0.7038    0.5384
Pt    0.0792    0.7050    0.5772
Pt    0.1227    0.5386    0.5394
Pt    0.1211    0.5399    0.5815
Pt    0.1220    0.5774    0.5372
Pt    0.1197    0.5785    0.5802
Pt    0.1227    0.6215    0.5382
Pt    0.1242    0.6209    0.5800
Pt    0.1226    0.6630    0.5361
Pt    0.1190    0.6626    0.5787
Pt    0.1207    0.7038    0.5352
Pt    0.1202    0.7065    0.5781
Pt    0.0171    0.5599    0.4974
Pt    0.1817    0.7297    0.5818
Pt    0.1658    0.5379    0.5375
Pt    0.1628    0.5373    0.5841
Pt    0.1620    0.5812    0.5384
Pt    0.1632    0.5798    0.5819
Pt    0.1639    0.6210    0.5389
Pt    0.1636    0.6227    0.5811
Pt    0.1646    0.6625    0.5370
Pt    0.1608    0.6621    0.5789
Pt    0.1600    0.7040    0.5367
Pt    0.1626    0.7053    0.5818
Pt    0.1807    0.7261    0.5391
Pt    0.1806    0.6849    0.5794
Pt    0.2059    0.5382    0.5398
Pt    0.2044    0.5369    0.5802
Pt    0.2057    0.5812    0.5389
Pt    0.2065    0.5790    0.5803
Pt    0.2056    0.6227    0.5367
Pt    0.2047    0.6240    0.5780
Pt    0.2039    0.6635    0.5353
Pt    0.2038    0.6658    0.5773
Pt    0.2053    0.7063    0.5381
Pt    0.2031    0.7049    0.5804
Pt    0.1829    0.6851    0.5404
Pt    0.1844    0.6446    0.5809
Pt    0.1823    0.4987    0.6042
Pt    0.1213    0.4980    0.5392
Pt    0.0818    0.4979    0.5388
Pt    0.0358    0.4985    0.4982
Pt    0.1405    0.4974    0.5163
Pt    0.0785    0.5816    0.4997
Pt    0.2454    0.5392    0.5377
Pt    0.9968    0.5186    0.6063
Pt    0.2262    0.4982    0.5170
Pt    0.1800    0.4973    0.5601
Pt    0.1834    0.6414    0.5369
Pt    0.1870    0.6041    0.5818
Pt    0.2249    0.4975    0.6040
Pt    0.2219    0.6447    0.5764
Pt    0.9993    0.5592    0.5612
Pt    0.2241    0.6435    0.5351
Pt    0.2268    0.6019    0.5771
Pt    0.2251    0.5994    0.5339
Pt    0.1395    0.7459    0.5604
Pt    0.2252    0.5586    0.5782
Pt    0.2280    0.5592    0.5395
Pt    0.2262    0.5184    0.5794
Pt    0.2270    0.5170    0.5393
Pt    0.0402    0.5175    0.5178
Pt    0.0383    0.5136    0.5622
Pt    0.0362    0.5139    0.6059
Pt    0.0404    0.5588    0.5194
Pt    0.0380    0.5605    0.5600
Pt    0.0390    0.5574    0.6014
Pt    0.0370    0.5999    0.5182
Pt    0.0401    0.5998    0.5602
Pt    0.0393    0.6005    0.6003
Pt    0.0344    0.6438    0.5599
Pt    0.0349    0.6432    0.5977
Pt    0.0379    0.6852    0.5555
Pt    0.0374    0.6830    0.5995
Pt    0.0704    0.7181    0.5131
Pt    0.0794    0.5167    0.5178
Pt    0.0803    0.5153    0.5602
Pt    0.0780    0.5123    0.6005
Pt    0.0800    0.5601    0.5181
Pt    0.0790    0.5559    0.5613
Pt    0.0782    0.5574    0.5999
Pt    0.0784    0.6024    0.5167
Pt    0.0808    0.6000    0.5582
Pt    0.0788    0.5998    0.6037
Pt    0.0806    0.6421    0.5166
Pt    0.0784    0.6421    0.5566
Pt    0.0809    0.6448    0.5988
Pt    0.0766    0.6852    0.5134
Pt    0.0760    0.6847    0.5571
Pt    0.0804    0.6825    0.5963
Pt    0.0781    0.7250    0.5606
Pt    0.0772    0.7273    0.5983
Pt    0.1214    0.5206    0.5181
Pt    0.1212    0.5167    0.5605
Pt    0.1194    0.5152    0.6027
Pt    0.1198    0.5602    0.5165
Pt    0.1212    0.5587    0.5582
Pt    0.1178    0.5578    0.6033
Pt    0.1220    0.5978    0.5166
Pt    0.1204    0.5985    0.5580
Pt    0.1189    0.5986    0.5986
Pt    0.1195    0.6439    0.5130
Pt    0.1172    0.6441    0.5582
Pt    0.1208    0.6424    0.6044
Pt    0.1219    0.6809    0.5136
Pt    0.1202    0.6816    0.5545
Pt    0.1198    0.6835    0.5992
Pt    0.1189    0.7237    0.5145
Pt    0.1183    0.7267    0.5571
Pt    0.1211    0.7319    0.5999
Pt    0.1611    0.5205    0.5148
Pt    0.1621    0.5194    0.5620
Pt    0.1608    0.5169    0.6034
Pt    0.1637    0.5579    0.5167
Pt    0.1618    0.5586    0.5598
Pt    0.1617    0.5564    0.6026
Pt    0.1636    0.5983    0.5161
Pt    0.1627    0.6002    0.5596
Pt    0.1642    0.6026    0.6023
Pt    0.1620    0.6425    0.5163
Pt    0.1639    0.6426    0.5594
Pt    0.1613    0.6412    0.6008
Pt    0.1638    0.6812    0.5175
Pt    0.1617    0.6844    0.5566
Pt    0.1618    0.6840    0.5996
Pt    0.1607    0.7241    0.5169
Pt    0.1612    0.7227    0.5609
Pt    0.1608    0.7248    0.6004
Pt    0.2055    0.5171    0.5189
Pt    0.2036    0.5176    0.5601
Pt    0.2060    0.5172    0.6025
Pt    0.2061    0.5573    0.5175
Pt    0.2043    0.5617    0.5583
Pt    0.2024    0.5597    0.6024
Pt    0.2051    0.6033    0.5155
Pt    0.2038    0.6008    0.5594
Pt    0.2055    0.6033    0.6015
Pt    0.2045    0.6424    0.5144
Pt    0.2032    0.6432    0.5567
Pt    0.2058    0.6435    0.6002
Pt    0.2047    0.6857    0.5160
Pt    0.2031    0.6858    0.5584
Pt    0.2038    0.6828    0.6001
Pt    0.2029    0.7281    0.5199
Pt    0.2053    0.7274    0.5603
Pt    0.2024    0.7279    0.5991
Pt    0.0293    0.7339    0.5001
Pt    0.9975    0.5184    0.5220
Pt    0.0182    0.4992    0.5180
Pt    0.1833    0.5013    0.5178
Pt    0.2028    0.7464    0.4982
Pt    0.2463    0.5824    0.5381
Pt    0.1390    0.5188    0.4970
Pt    0.2035    0.4973    0.5389
Pt    0.1627    0.7043    0.4968
Pt    0.1020    0.5175    0.4983
Pt    0.2458    0.5602    0.5157
Pt    0.0170    0.4975    0.5591
Pt    0.9969    0.5364    0.5819
Pt    0.0763    0.5378    0.6196
Pt    0.1614    0.4980    0.4980
Pt    0.1633    0.6197    0.5007
Pt    0.0562    0.5997    0.4975
Pt    0.1408    0.7256    0.6207
Pt    0.0168    0.5382    0.5204
Pt    0.0193    0.5366    0.5601
Pt    0.0191    0.5367    0.6032
Pt    0.0172    0.5805    0.5185
Pt    0.0187    0.5797    0.5581
Pt    0.0168    0.5812    0.6034
Pt    0.0106    0.6240    0.5561
Pt    0.0169    0.6202    0.6008
Pt    0.0162    0.6649    0.5987
Pt    0.0531    0.7402    0.5080
Pt    0.1831    0.6019    0.5410
Pt    0.0608    0.5363    0.5156
Pt    0.0580    0.5335    0.5628
Pt    0.0586    0.5369    0.6010
Pt    0.0590    0.5820    0.5195
Pt    0.0611    0.5766    0.5601
Pt    0.0583    0.5789    0.6017
Pt    0.0559    0.6207    0.5164
Pt    0.0573    0.6205    0.5597
Pt    0.0600    0.6217    0.5983
Pt    0.0580    0.6587    0.5164
Pt    0.0599    0.6638    0.5580
Pt    0.0590    0.6606    0.5971
Pt    0.0559    0.7072    0.5601
Pt    0.0570    0.7030    0.5975
Pt    0.0986    0.5383    0.5188
Pt    0.0998    0.5352    0.5613
Pt    0.0981    0.5361    0.6005
Pt    0.0990    0.5823    0.5184
Pt    0.0991    0.5781    0.5573
Pt    0.0981    0.5765    0.6020
Pt    0.1030    0.6216    0.5133
Pt    0.0989    0.6208    0.5578
Pt    0.0997    0.6192    0.5988
Pt    0.1004    0.6640    0.5128
Pt    0.0999    0.6647    0.5549
Pt    0.1008    0.6655    0.6036
Pt    0.0982    0.7077    0.5158
Pt    0.1006    0.7064    0.5576
Pt    0.1010    0.7044    0.5996
Pt    0.1840    0.5591    0.5817
Pt    0.1410    0.5407    0.5155
Pt    0.1408    0.5388    0.5587
Pt    0.1412    0.5380    0.6021
Pt    0.1406    0.5788    0.5145
Pt    0.1431    0.5808    0.5595
Pt    0.1412    0.5769    0.6031
Pt    0.1407    0.6216    0.5153
Pt    0.1418    0.6231    0.5586
Pt    0.1399    0.6226    0.6033
Pt    0.1422    0.6626    0.5153
Pt    0.1423    0.6614    0.5586
Pt    0.1401    0.6654    0.6002
Pt    0.1405    0.7022    0.5150
Pt    0.1412    0.7034    0.5579
Pt    0.1358    0.7055    0.6012
Pt    0.1811    0.5608    0.5377
Pt    0.1823    0.5167    0.5826
Pt    0.1843    0.5185    0.5401
Pt    0.1843    0.5386    0.5162
Pt    0.1844    0.5390    0.5622
Pt    0.1846    0.5384    0.6043
Pt    0.1863    0.5794    0.5187
Pt    0.1820    0.5796    0.5586
Pt    0.1868    0.5815    0.6003
Pt    0.1845    0.6179    0.5179
Pt    0.1819    0.6228    0.5607
Pt    0.1835    0.6255    0.6013
Pt    0.1841    0.6638    0.5155
Pt    0.1839    0.6622    0.5588
Pt    0.1809    0.6636    0.5984
Pt    0.1844    0.7076    0.5168
Pt    0.1845    0.7071    0.5588
Pt    0.1827    0.7067    0.6019
Pt    0.1410    0.7269    0.5799
Pt    0.1392    0.7248    0.5354
Pt    0.1402    0.6854    0.5773
Pt    0.2247    0.5386    0.5185
Pt    0.2249    0.5387    0.5597
Pt    0.2260    0.5384    0.5993
Pt    0.2261    0.5791    0.5153
Pt    0.2283    0.5824    0.5578
Pt    0.2241    0.5842    0.6027
Pt    0.2275    0.6249    0.5124
Pt    0.2264    0.6234    0.5592
Pt    0.2262    0.6220    0.5975
Pt    0.2243    0.6668    0.5148
Pt    0.2248    0.6648    0.5558
Pt    0.2268    0.6608    0.5999
Pt    0.2247    0.7051    0.5152
Pt    0.2263    0.7075    0.5598
Pt    0.2259    0.7060    0.6012
Pt    0.1421    0.6830    0.5357
Pt    0.1414    0.6436    0.5813
Pt    0.1407    0.6421    0.5355
Pt    0.0203    0.5188    0.5403
Pt    0.0155    0.5130    0.5842
Pt    0.0196    0.5585    0.5403
Pt    0.0184    0.5569    0.5836
Pt    0.0149    0.5997    0.5409
Pt    0.0179    0.5994    0.5799
Pt    0.0158    0.6433    0.5789
Pt    0.2457    0.4972    0.5816
Pt    0.0585    0.5163    0.5413
Pt    0.0549    0.5123    0.5844
Pt    0.0599    0.5567    0.5400
Pt    0.0563    0.5556    0.5806
Pt    0.0590    0.6024    0.5384
Pt    0.0610    0.6004    0.5796
Pt    0.0563    0.6377    0.5376
Pt    0.0578    0.6424    0.5762
Pt    0.0580    0.6830    0.5354
Pt    0.0562    0.6861    0.5771
Pt    0.0645    0.7300    0.5358
Pt    0.0562    0.7263    0.5822
Pt    0.1007    0.5183    0.5400
Pt    0.0972    0.5149    0.5813
Pt    0.0980    0.5566    0.5426
Pt    0.0998    0.5581    0.5793
Pt    0.1009    0.6037    0.5346
Pt    0.1012    0.5986    0.5783
Pt    0.0992    0.6423    0.5364
Pt    0.1016    0.6391    0.5823
Pt    0.1004    0.6828    0.5334
Pt    0.0975    0.6845    0.5731
Pt    0.0971    0.7282    0.5364
Pt    0.1007    0.7259    0.5820
Pt    0.1416    0.5166    0.5427
Pt    0.1390    0.5164    0.5827
Pt    0.1435    0.5609    0.5378
Pt    0.1432    0.5599    0.5798
Pt    0.1452    0.6036    0.5376
Pt    0.1406    0.5967    0.5822
Pt    0.2461    0.6014    0.5143
Pt    0.0587    0.4973    0.5182
Pt    0.2439    0.6222    0.5372
Pt    0.0805    0.6213    0.6204
Pt    0.0615    0.6423    0.6196
Pt    0.0581    0.6850    0.6209
Pt    0.2445    0.6847    0.5582
Pt    0.2454    0.7265    0.5179
Pt    0.9965    0.5774    0.5823
Pt    0.0380    0.5800    0.4986
Pt    0.1619    0.5002    0.5361
Pt    0.2456    0.7282    0.6010
Pt    0.2453    0.7064    0.4981
Pt    0.2044    0.7055    0.6200
Pt    0.1822    0.6429    0.4966
Pt    0.0135    0.6877    0.6171
Pt    0.0783    0.7453    0.6197
Pt    0.0787    0.7043    0.6165
Pt    0.0171    0.5177    0.4977
Pt    0.2449    0.7069    0.6210
Pt    0.2449    0.5176    0.6011
Pt    0.1638    0.5801    0.6201
Pt    0.0391    0.6241    0.6155
Pt    0.0588    0.5582    0.4984
Pt    0.1417    0.5997    0.6181
Pt    0.2293    0.6033    0.6210
Pt    0.0145    0.6412    0.6180
Pt    0.9969    0.5595    0.5162
Pt    0.2230    0.7275    0.4978
Pt    0.1846    0.6869    0.4972
Pt    0.1207    0.7448    0.5367
Pt    0.2241    0.6812    0.6176
Pt    0.2462    0.7297    0.5621
Pt    0.2447    0.7055    0.5376
Pt    0.0967    0.7267    0.6178
Pt    0.2455    0.6664    0.5362
Pt    0.0399    0.6650    0.6183
Pt    0.1829    0.6843    0.6191
Pt    0.2432    0.6623    0.5751
Pt    0.0365    0.7057    0.6183
Pt    0.2460    0.6436    0.5164
Pt    0.2447    0.5179    0.5578
Pt    0.2239    0.5580    0.6186
Pt    0.0571    0.7262    0.6195
Pt    0.2037    0.6611    0.6206
Pt    0.1629    0.6617    0.6188
Pt    0.1412    0.7455    0.5176
Pt    0.0997    0.5138    0.6206
Pt    0.0184    0.5575    0.6210
Pt    0.0984    0.5988    0.6212
Pt    0.0175    0.6001    0.6210
Pt    0.0584    0.6005    0.6213
Pt    0.0380    0.5373    0.4986
Pt    0.1838    0.7262    0.4976
Pt    0.2232    0.4971    0.6853
Pt    0.2254    0.7251    0.7030
Pt    0.2241    0.7245    0.6636
Pt    0.1638    0.6225    0.6236
Pt    0.2444    0.5181    0.6436
Pt    0.2235    0.6839    0.7050
Pt    0.2235    0.6824    0.6603
Pt    0.1399    0.5574    0.6250
Pt    0.2248    0.4973    0.7251
Pt    0.2232    0.6405    0.7067
Pt    0.2233    0.6430    0.6630
Pt    0.1394    0.6822    0.7064
Pt    0.1405    0.6832    0.6632
Pt    0.2265    0.7046    0.7256
Pt    0.0563    0.5592    0.6232
Pt    0.0372    0.5354    0.6652
Pt    0.0573    0.5191    0.7143
Pt    0.1429    0.4974    0.7278
Pt    0.0359    0.5762    0.6656
Pt    0.0345    0.5757    0.7058
Pt    0.1399    0.6424    0.7072
Pt    0.0372    0.6211    0.6621
Pt    0.0362    0.6192    0.7062
Pt    0.1412    0.6413    0.6631
Pt    0.0350    0.6599    0.6593
Pt    0.0344    0.6609    0.7012
Pt    0.2443    0.5595    0.7288
Pt    0.1420    0.6029    0.7052
Pt    0.0349    0.7056    0.6606
Pt    0.0346    0.7029    0.7024
Pt    0.1402    0.6001    0.6622
Pt    0.1199    0.5780    0.6249
Pt    0.2228    0.5177    0.6640
Pt    0.2440    0.6822    0.6841
Pt    0.2039    0.5378    0.6229
Pt    0.0781    0.5379    0.6636
Pt    0.0781    0.5371    0.7092
Pt    0.1806    0.4987    0.6875
Pt    0.0750    0.5761    0.6639
Pt    0.0787    0.5761    0.7058
Pt    0.0585    0.7435    0.7248
Pt    0.0762    0.6205    0.6636
Pt    0.0775    0.6182    0.7044
Pt    0.1401    0.5593    0.7056
Pt    0.1416    0.5604    0.6621
Pt    0.0797    0.6584    0.6624
Pt    0.0784    0.6595    0.7032
Pt    0.9969    0.7441    0.7046
Pt    0.1422    0.5166    0.7080
Pt    0.0764    0.7060    0.6644
Pt    0.0775    0.7036    0.7046
Pt    0.1404    0.5158    0.6659
Pt    0.2042    0.4988    0.7053
Pt    0.1229    0.6637    0.6242
Pt    0.1837    0.7282    0.7057
Pt    0.9967    0.7463    0.6607
Pt    0.2022    0.4993    0.6644
Pt    0.1181    0.5356    0.6676
Pt    0.1213    0.5366    0.7069
Pt    0.0777    0.5778    0.6231
Pt    0.1385    0.5173    0.6226
Pt    0.1205    0.5793    0.6616
Pt    0.1205    0.5784    0.7056
Pt    0.0995    0.7247    0.7037
Pt    0.0995    0.7235    0.6636
Pt    0.1198    0.6198    0.6647
Pt    0.1194    0.6184    0.7047
Pt    0.0961    0.6829    0.7046
Pt    0.1001    0.6852    0.6625
Pt    0.1189    0.6612    0.6646
Pt    0.1183    0.6638    0.7059
Pt    0.0988    0.6380    0.7045
Pt    0.1009    0.6391    0.6641
Pt    0.1211    0.7054    0.6652
Pt    0.1175    0.7043    0.7055
Pt    0.0976    0.5972    0.7071
Pt    0.1830    0.7265    0.6632
Pt    0.0956    0.5996    0.6619
Pt    0.9968    0.7454    0.7465
Pt    0.1419    0.7452    0.6844
Pt    0.2422    0.5376    0.6218
Pt    0.1606    0.5370    0.6659
Pt    0.1613    0.5392    0.7063
Pt    0.1025    0.5567    0.7069
Pt    0.2441    0.6629    0.7035
Pt    0.1621    0.5820    0.6632
Pt    0.1611    0.5811    0.7051
Pt    0.1003    0.5573    0.6627
Pt    0.0989    0.4995    0.6439
Pt    0.1623    0.6219    0.6631
Pt    0.1619    0.6219    0.7065
Pt    0.0972    0.5170    0.7063
Pt    0.0971    0.5163    0.6676
Pt    0.1602    0.6620    0.6621
Pt    0.1623    0.6603    0.7080
Pt    0.2441    0.6833    0.6419
Pt    0.0557    0.7232    0.7057
Pt    0.1598    0.7040    0.6644
Pt    0.1643    0.7061    0.7069
Pt    0.0593    0.7261    0.6607
Pt    0.1828    0.6833    0.7074
Pt    0.1818    0.6837    0.6638
Pt    0.0578    0.6794    0.7053
Pt    0.1853    0.7264    0.6237
Pt    0.2441    0.6443    0.6442
Pt    0.2035    0.5400    0.6642
Pt    0.2016    0.5401    0.7071
Pt    0.0519    0.6837    0.6603
Pt    0.0178    0.6804    0.7445
Pt    0.2048    0.5818    0.6629
Pt    0.2024    0.5780    0.7050
Pt    0.0561    0.6376    0.7049
Pt    0.0571    0.6401    0.6602
Pt    0.2058    0.6216    0.6651
Pt    0.2046    0.6183    0.7088
Pt    0.0563    0.5989    0.7061
Pt    0.0573    0.5963    0.6663
Pt    0.2021    0.6641    0.6643
Pt    0.2028    0.6626    0.7027
Pt    0.0956    0.7427    0.7254
Pt    0.0575    0.5525    0.7081
Pt    0.2023    0.7054    0.6642
Pt    0.2062    0.7054    0.7035
Pt    0.0544    0.5556    0.6654
Pt    0.2451    0.5176    0.6877
Pt    0.1857    0.6394    0.7068
Pt    0.1848    0.6431    0.6671
Pt    0.2254    0.5378    0.6843
Pt    0.1231    0.7455    0.6628
Pt    0.0590    0.7448    0.6406
Pt    0.2463    0.5783    0.6646
Pt    0.0597    0.5161    0.6648
Pt    0.2233    0.5391    0.6449
Pt    0.9971    0.6025    0.6405
Pt    0.0775    0.7454    0.7015
Pt    0.1430    0.7266    0.7065
Pt    0.0136    0.7222    0.7023
Pt    0.0768    0.7423    0.7464
Pt    0.9967    0.6420    0.6827
Pt    0.0162    0.7270    0.6598
Pt    0.0144    0.6808    0.7019
Pt    0.1429    0.7264    0.6628
Pt    0.2041    0.6209    0.6222
Pt    0.0150    0.6824    0.6614
Pt    0.0363    0.7411    0.7041
Pt    0.2429    0.6633    0.6626
Pt    0.1845    0.7066    0.7246
Pt    0.2456    0.5991    0.6869
Pt    0.0138    0.6405    0.7032
Pt    0.0171    0.6405    0.6595
Pt    0.1839    0.6000    0.7075
Pt    0.1802    0.6011    0.6641
Pt    0.2231    0.5987    0.7055
Pt    0.2253    0.6011    0.6653
Pt    0.0564    0.7456    0.6833
Pt    0.0179    0.6010    0.6606
Pt    0.1835    0.7043    0.6852
Pt    0.2222    0.5572    0.7031
Pt    0.2224    0.5614    0.6623
Pt    0.2252    0.6611    0.7263
Pt    0.2238    0.6624    0.6838
Pt    0.2263    0.7044    0.6820
Pt    0.2237    0.5209    0.7061
Pt    0.0568    0.5439    0.7333
Pt    0.0342    0.5550    0.6444
Pt    0.0386    0.5543    0.6890
Pt    0.0381    0.5994    0.6420
Pt    0.0356    0.5979    0.6843
Pt    0.0386    0.6434    0.6377
Pt    0.0393    0.6424    0.6825
Pt    0.0348    0.6425    0.7237
Pt    0.0328    0.6849    0.6389
Pt    0.0369    0.6822    0.6823
Pt    0.0341    0.6789    0.7215
Pt    0.0367    0.7268    0.6394
Pt    0.0372    0.7235    0.6821
Pt    0.0377    0.7212    0.7267
Pt    0.0764    0.5179    0.6425
Pt    0.0767    0.5192    0.6869
Pt    0.0784    0.5582    0.6419
Pt    0.0757    0.5544    0.6858
Pt    0.0793    0.5580    0.7276
Pt    0.0767    0.5992    0.6418
Pt    0.0784    0.5971    0.6849
Pt    0.0769    0.5964    0.7304
Pt    0.0778    0.6397    0.6414
Pt    0.0765    0.6398    0.6836
Pt    0.0775    0.6417    0.7270
Pt    0.0781    0.6846    0.6444
Pt    0.0789    0.6814    0.6803
Pt    0.0769    0.6805    0.7264
Pt    0.0791    0.7248    0.6391
Pt    0.0756    0.7246    0.6853
Pt    0.0772    0.7231    0.7256
Pt    0.1236    0.5152    0.6446
Pt    0.1194    0.5158    0.6869
Pt    0.1189    0.5186    0.7274
Pt    0.1178    0.5559    0.6434
Pt    0.1208    0.5593    0.6835
Pt    0.1208    0.5569    0.7271
Pt    0.1188    0.6001    0.6415
Pt    0.1184    0.6003    0.6830
Pt    0.1203    0.5981    0.7286
Pt    0.1191    0.6422    0.6427
Pt    0.1208    0.6437    0.6867
Pt    0.1195    0.6391    0.7264
Pt    0.1192    0.6848    0.6438
Pt    0.1209    0.6828    0.6828
Pt    0.1175    0.6860    0.7286
Pt    0.1208    0.7260    0.6423
Pt    0.1218    0.7248    0.6873
Pt    0.1211    0.7269    0.7255
Pt    0.1612    0.5161    0.6411
Pt    0.1600    0.5172    0.6870
Pt    0.1642    0.5168    0.7259
Pt    0.1614    0.5610    0.6420
Pt    0.1604    0.5593    0.6860
Pt    0.1617    0.5587    0.7279
Pt    0.1609    0.6021    0.6425
Pt    0.1620    0.6043    0.6852
Pt    0.1604    0.5998    0.7292
Pt    0.1625    0.6415    0.6425
Pt    0.1612    0.6425    0.6836
Pt    0.1640    0.6411    0.7272
Pt    0.1594    0.6832    0.6422
Pt    0.1609    0.6860    0.6871
Pt    0.1619    0.6818    0.7272
Pt    0.1638    0.7243    0.6424
Pt    0.1633    0.7252    0.6846
Pt    0.1628    0.7250    0.7269
Pt    0.2026    0.5178    0.6449
Pt    0.2030    0.5198    0.6851
Pt    0.2051    0.5178    0.7289
Pt    0.2060    0.5582    0.6402
Pt    0.2023    0.5593    0.6826
Pt    0.2036    0.5609    0.7286
Pt    0.2075    0.6005    0.6427
Pt    0.2034    0.6014    0.6816
Pt    0.2035    0.5979    0.7283
Pt    0.2035    0.6410    0.6421
Pt    0.2051    0.6410    0.6844
Pt    0.2041    0.6397    0.7286
Pt    0.2042    0.6859    0.6384
Pt    0.2047    0.6839    0.6839
Pt    0.2052    0.6844    0.7258
Pt    0.2042    0.7220    0.6422
Pt    0.2061    0.7277    0.6835
Pt    0.2069    0.7257    0.7261
Pt    0.1827    0.7444    0.6849
Pt    0.2219    0.6628    0.6420
Pt    0.1178    0.5360    0.6218
Pt    0.0578    0.5165    0.6221
Pt    0.1809    0.7016    0.6424
Pt    0.1856    0.6625    0.7254
Pt    0.1795    0.6649    0.6866
Pt    0.2253    0.6163    0.7279
Pt    0.2238    0.6216    0.6852
Pt    0.0166    0.7239    0.7455
Pt    0.2449    0.5384    0.7083
Pt    0.1821    0.6643    0.6422
Pt    0.2249    0.6212    0.6424
Pt    0.1815    0.6203    0.7288
Pt    0.1853    0.6228    0.6869
Pt    0.2272    0.5799    0.7284
Pt    0.1658    0.7044    0.7452
Pt    0.2263    0.7035    0.6421
Pt    0.1603    0.5393    0.6224
Pt    0.0168    0.5782    0.6429
Pt    0.0187    0.6214    0.6392
Pt    0.0161    0.6190    0.6843
Pt    0.0138    0.6619    0.6354
Pt    0.0161    0.6617    0.6796
Pt    0.0134    0.6606    0.7237
Pt    0.0134    0.7062    0.6393
Pt    0.0173    0.7017    0.6801
Pt    0.0159    0.7020    0.7235
Pt    0.1851    0.6223    0.6436
Pt    0.2433    0.6432    0.6834
Pt    0.1816    0.5790    0.7294
Pt    0.0571    0.5372    0.6450
Pt    0.0558    0.5333    0.6874
Pt    0.0317    0.5483    0.7229
Pt    0.0561    0.5774    0.6451
Pt    0.0567    0.5768    0.6887
Pt    0.0525    0.5697    0.7290
Pt    0.0581    0.6197    0.6421
Pt    0.0551    0.6182    0.6858
Pt    0.0578    0.6220    0.7290
Pt    0.0582    0.6621    0.6396
Pt    0.0582    0.6641    0.6828
Pt    0.0559    0.6589    0.7255
Pt    0.0565    0.7044    0.6403
Pt    0.0568    0.7006    0.6848
Pt    0.0536    0.6980    0.7237
Pt    0.2232    0.5781    0.6848
Pt    0.1793    0.5595    0.7047
Pt    0.1813    0.5797    0.6837
Pt    0.0983    0.5360    0.6437
Pt    0.0992    0.5390    0.6884
Pt    0.0982    0.5392    0.7289
Pt    0.0972    0.5806    0.6438
Pt    0.1021    0.5774    0.6842
Pt    0.0993    0.5773    0.7258
Pt    0.0970    0.6191    0.6417
Pt    0.0962    0.6195    0.6830
Pt    0.0945    0.6195    0.7249
Pt    0.0982    0.6636    0.6432
Pt    0.0985    0.6609    0.6842
Pt    0.0989    0.6624    0.7251
Pt    0.0988    0.7064    0.6412
Pt    0.0982    0.7040    0.6841
Pt    0.0968    0.7039    0.7257
Pt    0.1812    0.5601    0.6621
Pt    0.2283    0.5802    0.6429
Pt    0.2219    0.5403    0.7280
Pt    0.1444    0.5364    0.6450
Pt    0.1394    0.5381    0.6860
Pt    0.1415    0.5363    0.7298
Pt    0.1432    0.5797    0.6407
Pt    0.1423    0.5814    0.6835
Pt    0.1395    0.5782    0.7268
Pt    0.1392    0.6190    0.6423
Pt    0.1384    0.6201    0.6841
Pt    0.1421    0.6205    0.7255
Pt    0.1408    0.6631    0.6429
Pt    0.1434    0.6631    0.6860
Pt    0.1396    0.6620    0.7283
Pt    0.1411    0.7067    0.6431
Pt    0.1401    0.7041    0.6858
Pt    0.1409    0.7026    0.7277
Pt    0.0330    0.5311    0.7023
Pt    0.1839    0.5163    0.7074
Pt    0.1805    0.5169    0.6661
Pt    0.1839    0.5387    0.6435
Pt    0.1804    0.5386    0.6851
Pt    0.1822    0.5382    0.7286
Pt    0.1845    0.5816    0.6429
Pt    0.2280    0.7453    0.7256
Pt    0.0992    0.5587    0.6235
Pt    0.0813    0.6653    0.6219
Pt    0.2462    0.7261    0.6832
Pt    0.0397    0.5355    0.6241
Pt    0.9973    0.6386    0.7276
Pt    0.2441    0.5566    0.6866
Pt    0.0811    0.7433    0.6603
Pt    0.2449    0.5554    0.6434
Pt    0.0057    0.5169    0.7333
Pt    0.2451    0.6210    0.6653
Pt    0.2413    0.5784    0.7070
Pt    0.1627    0.7462    0.7067
Pt    0.1426    0.6409    0.6238
Pt    0.2456    0.6632    0.6221
Pt    0.2237    0.5151    0.6271
Pt    0.0348    0.5211    0.7278
Pt    0.0366    0.5787    0.6225
Pt    0.2451    0.6839    0.7245
Pt    0.2280    0.7250    0.7453
Pt    0.2452    0.5200    0.7286
Pt    0.2461    0.6427    0.7280
Pt    0.2440    0.7037    0.7037
Pt    0.1629    0.7060    0.6216
Pt    0.2057    0.6623    0.7454
Pt    0.2446    0.5335    0.6634
Pt    0.1823    0.5175    0.6242
Pt    0.0179    0.7419    0.7237
Pt    0.0995    0.7445    0.6815
Pt    0.1836    0.5609    0.6231
Pt    0.2061    0.5798    0.6234
Pt    0.0566    0.7223    0.7463
Pt    0.1821    0.6416    0.6239
Pt    0.1825    0.6016    0.6248
Pt    0.1190    0.7082    0.6221
Pt    0.2260    0.6416    0.6245
Pt    0.0990    0.7236    0.7466
Pt    0.0995    0.6428    0.6218
Pt    0.1862    0.7262    0.7461
Pt    0.0376    0.7426    0.7460
Pt    0.1831    0.6838    0.7456
Pt    0.0358    0.7033    0.7461
Pt    0.0980    0.5989    0.7459
Pt    0.1209    0.5770    0.7461
Pt    0.1837    0.6413    0.7454
Pt    0.1413    0.6850    0.6223
Pt    0.1205    0.6200    0.6226
Pt    0.2254    0.7284    0.6230
Pt    0.2464    0.7247    0.7231
Pt    0.0373    0.7466    0.6618
Pt    0.1012    0.6860    0.6217
Pt    0.2257    0.7256    0.8308
Pt    0.9969    0.7018    0.7886
Pt    0.1815    0.5013    0.8111
Pt    0.1880    0.5024    0.8546
Pt    0.1831    0.4998    0.7713
Pt    0.0995    0.6838    0.7471
Pt    0.0153    0.7459    0.8122
Pt    0.0398    0.6626    0.7899
Pt    0.0388    0.6645    0.8291
Pt    0.0358    0.7038    0.7879
Pt    0.0384    0.7061    0.8327
Pt    0.1631    0.5367    0.7483
Pt    0.0778    0.6625    0.7470
Pt    0.0807    0.6622    0.7898
Pt    0.0789    0.6583    0.8338
Pt    0.0790    0.7035    0.7882
Pt    0.0811    0.7026    0.8321
Pt    0.9964    0.7235    0.8509
Pt    0.2273    0.7436    0.8529
Pt    0.1183    0.5823    0.7893
Pt    0.1160    0.5751    0.8309
Pt    0.1195    0.6226    0.7905
Pt    0.1213    0.6171    0.8329
Pt    0.1181    0.6622    0.7901
Pt    0.1214    0.6591    0.8327
Pt    0.1212    0.7031    0.7902
Pt    0.1221    0.7022    0.8302
Pt    0.0121    0.5164    0.7612
Pt    0.2247    0.5592    0.7501
Pt    0.1565    0.5363    0.7891
Pt    0.1629    0.5406    0.8344
Pt    0.1611    0.5792    0.7889
Pt    0.1635    0.5697    0.8354
Pt    0.1617    0.6202    0.7902
Pt    0.1653    0.6174    0.8313
Pt    0.1621    0.6602    0.7908
Pt    0.1621    0.6610    0.8319
Pt    0.1624    0.7010    0.7908
Pt    0.1626    0.7031    0.8312
Pt    0.2040    0.7431    0.7910
Pt    0.0567    0.7452    0.8515
Pt    0.2034    0.5385    0.7915
Pt    0.2045    0.5382    0.8360
Pt    0.2040    0.5786    0.7923
Pt    0.2028    0.5786    0.8317
Pt    0.2041    0.6209    0.7897
Pt    0.2053    0.6194    0.8318
Pt    0.2037    0.6623    0.7875
Pt    0.2069    0.6613    0.8327
Pt    0.2031    0.7021    0.7890
Pt    0.2054    0.7023    0.8311
Pt    0.1657    0.4991    0.8340
Pt    0.0972    0.6421    0.7482
Pt    0.0997    0.5005    0.8535
Pt    0.0004    0.6393    0.8477
Pt    0.2255    0.4975    0.7712
Pt    0.9975    0.6607    0.7475
Pt    0.1214    0.5395    0.7476
Pt    0.2439    0.7221    0.8088
Pt    0.1210    0.5018    0.8310
Pt    0.1647    0.7443    0.7900
Pt    0.2281    0.5985    0.7505
Pt    0.2451    0.5581    0.7711
Pt    0.2228    0.7216    0.7906
Pt    0.2267    0.6797    0.8310
Pt    0.2248    0.6829    0.7881
Pt    0.2252    0.6416    0.8295
Pt    0.2239    0.6413    0.7890
Pt    0.0160    0.7450    0.8492
Pt    0.2450    0.6419    0.7691
Pt    0.9973    0.7016    0.7486
Pt    0.0161    0.7438    0.7668
Pt    0.0781    0.7030    0.7469
Pt    0.1426    0.7449    0.7675
Pt    0.1419    0.4989    0.7709
Pt    0.0384    0.7457    0.7908
Pt    0.0377    0.6416    0.7679
Pt    0.9970    0.6614    0.7885
Pt    0.0376    0.6846    0.7685
Pt    0.0394    0.6833    0.8099
Pt    0.0380    0.6826    0.8507
Pt    0.0359    0.7258    0.7670
Pt    0.0382    0.7250    0.8101
Pt    0.0344    0.7257    0.8524
Pt    0.1008    0.6170    0.8540
Pt    0.0784    0.6405    0.7682
Pt    0.0772    0.6390    0.8122
Pt    0.0833    0.6379    0.8551
Pt    0.0805    0.6823    0.7689
Pt    0.0780    0.6842    0.8096
Pt    0.0830    0.6812    0.8497
Pt    0.0775    0.7238    0.7670
Pt    0.0794    0.7247    0.8098
Pt    0.0810    0.7237    0.8524
Pt    0.1198    0.5189    0.8540
Pt    0.1193    0.5537    0.8499
Pt    0.1176    0.6013    0.7694
Pt    0.1188    0.5978    0.8116
Pt    0.1217    0.5995    0.8539
Pt    0.1195    0.6398    0.7650
Pt    0.1182    0.6419    0.8119
Pt    0.1207    0.6405    0.8549
Pt    0.1192    0.6829    0.7686
Pt    0.1231    0.6812    0.8117
Pt    0.1204    0.6805    0.8520
Pt    0.1225    0.7237    0.7691
Pt    0.1232    0.7235    0.8111
Pt    0.1198    0.7253    0.8481
Pt    0.1627    0.5187    0.7680
Pt    0.1585    0.5220    0.8135
Pt    0.1619    0.5194    0.8541
Pt    0.1590    0.5587    0.7711
Pt    0.1599    0.5543    0.8101
Pt    0.1688    0.5504    0.8602
Pt    0.1607    0.6026    0.7715
Pt    0.1601    0.5976    0.8119
Pt    0.1616    0.5944    0.8505
Pt    0.1656    0.6437    0.7695
Pt    0.1634    0.6416    0.8116
Pt    0.1614    0.6368    0.8525
Pt    0.1636    0.6822    0.7712
Pt    0.1658    0.6809    0.8090
Pt    0.1647    0.6823    0.8519
Pt    0.1616    0.7223    0.7680
Pt    0.1648    0.7241    0.8103
Pt    0.1655    0.7220    0.8529
Pt    0.2051    0.5147    0.7714
Pt    0.2048    0.5177    0.8118
Pt    0.2036    0.5596    0.7722
Pt    0.2040    0.5577    0.8142
Pt    0.2054    0.5994    0.7702
Pt    0.2018    0.5974    0.8108
Pt    0.2050    0.5987    0.8540
Pt    0.2031    0.6405    0.7676
Pt    0.2053    0.6411    0.8124
Pt    0.2049    0.6415    0.8532
Pt    0.2045    0.6835    0.7676
Pt    0.2079    0.6807    0.8089
Pt    0.2067    0.6800    0.8530
Pt    0.2065    0.7271    0.7659
Pt    0.2023    0.7231    0.8096
Pt    0.2069    0.7259    0.8530
Pt    0.2440    0.6409    0.8531
Pt    0.9969    0.6413    0.8119
Pt    0.9978    0.6806    0.7689
Pt    0.2464    0.4978    0.8374
Pt    0.2450    0.6617    0.7484
Pt    0.9970    0.6621    0.8306
Pt    0.1834    0.7446    0.8097
Pt    0.1835    0.5989    0.7491
Pt    0.1829    0.5161    0.7470
Pt    0.1424    0.4988    0.8169
Pt    0.9973    0.6805    0.8511
Pt    0.2046    0.6187    0.7480
Pt    0.2053    0.4983    0.8333
Pt    0.2055    0.5777    0.7499
Pt    0.1411    0.5995    0.7493
Pt    0.2462    0.6817    0.8097
Pt    0.2086    0.7459    0.7477
Pt    0.1406    0.5193    0.7510
Pt    0.0190    0.6616    0.7678
Pt    0.0175    0.6606    0.8066
Pt    0.0187    0.6651    0.8525
Pt    0.0153    0.7025    0.7663
Pt    0.0179    0.7041    0.8086
Pt    0.0155    0.7014    0.8510
Pt    0.1441    0.7449    0.8121
Pt    0.0781    0.7429    0.7866
Pt    0.1196    0.7431    0.7470
Pt    0.0589    0.6634    0.7696
Pt    0.0605    0.6641    0.8115
Pt    0.0573    0.6648    0.8514
Pt    0.0572    0.7047    0.7677
Pt    0.0578    0.7040    0.8133
Pt    0.0602    0.7064    0.8519
Pt    0.2461    0.5377    0.8344
Pt    0.2267    0.6410    0.7481
Pt    0.0584    0.6841    0.7468
Pt    0.0974    0.5388    0.8537
Pt    0.1018    0.5966    0.8338
Pt    0.0980    0.6209    0.7697
Pt    0.0993    0.6215    0.8096
Pt    0.1013    0.6629    0.7689
Pt    0.0982    0.6607    0.8135
Pt    0.1024    0.6617    0.8543
Pt    0.1007    0.7040    0.7702
Pt    0.1013    0.7057    0.8101
Pt    0.1020    0.7040    0.8511
Pt    0.1621    0.6203    0.7497
Pt    0.1432    0.6397    0.7477
Pt    0.1196    0.6622    0.7470
Pt    0.1421    0.5406    0.8578
Pt    0.1358    0.5780    0.7693
Pt    0.1399    0.5780    0.8058
Pt    0.1440    0.5721    0.8547
Pt    0.1401    0.6196    0.7696
Pt    0.1435    0.6198    0.8124
Pt    0.1425    0.6150    0.8508
Pt    0.1420    0.6624    0.7684
Pt    0.1398    0.6589    0.8125
Pt    0.1429    0.6622    0.8537
Pt    0.1440    0.7008    0.7696
Pt    0.1430    0.7007    0.8107
Pt    0.1434    0.7029    0.8527
Pt    0.9965    0.6395    0.7699
Pt    0.2462    0.5342    0.7886
Pt    0.1234    0.7446    0.7921
Pt    0.1846    0.5391    0.7715
Pt    0.1826    0.5382    0.8134
Pt    0.1825    0.5798    0.7710
Pt    0.1821    0.5784    0.8129
Pt    0.1834    0.5791    0.8537
Pt    0.1834    0.6218    0.7707
Pt    0.1840    0.6194    0.8094
Pt    0.1850    0.6189    0.8525
Pt    0.1847    0.6621    0.7664
Pt    0.1874    0.6611    0.8104
Pt    0.1826    0.6568    0.8493
Pt    0.1832    0.7045    0.7675
Pt    0.1862    0.6993    0.8131
Pt    0.1839    0.7010    0.8526
Pt    0.1622    0.4998    0.7929
Pt    0.2452    0.5167    0.8570
Pt    0.2459    0.5388    0.7484
Pt    0.2230    0.5383    0.7687
Pt    0.2245    0.5385    0.8138
Pt    0.2267    0.5807    0.7726
Pt    0.2271    0.5799    0.8097
Pt    0.2262    0.5794    0.8552
Pt    0.2243    0.6198    0.7706
Pt    0.2246    0.6207    0.8114
Pt    0.2233    0.6203    0.8499
Pt    0.2235    0.6621    0.7669
Pt    0.2280    0.6612    0.8081
Pt    0.2268    0.6621    0.8551
Pt    0.2251    0.7058    0.7670
Pt    0.2256    0.7005    0.8100
Pt    0.2266    0.7030    0.8524
Pt    0.1434    0.5578    0.7491
Pt    0.1614    0.5806    0.7514
Pt    0.1425    0.6818    0.7479
Pt    0.0196    0.6404    0.8274
Pt    0.0167    0.6823    0.7895
Pt    0.0165    0.6842    0.8272
Pt    0.0178    0.7260    0.7884
Pt    0.0166    0.7234    0.8307
Pt    0.0571    0.6405    0.8317
Pt    0.0572    0.6853    0.7903
Pt    0.0608    0.6847    0.8311
Pt    0.0570    0.7230    0.7896
Pt    0.0604    0.7263    0.8317
Pt    0.1010    0.5786    0.8542
Pt    0.0992    0.6005    0.7910
Pt    0.0961    0.6405    0.7898
Pt    0.1009    0.6384    0.8347
Pt    0.0987    0.6840    0.7893
Pt    0.1026    0.6811    0.8307
Pt    0.1014    0.7258    0.7903
Pt    0.1008    0.7284    0.8284
Pt    0.1385    0.5234    0.8306
Pt    0.1370    0.5556    0.8307
Pt    0.1387    0.6009    0.7906
Pt    0.1404    0.5951    0.8311
Pt    0.1403    0.6414    0.7898
Pt    0.1402    0.6392    0.8341
Pt    0.1415    0.6792    0.7906
Pt    0.1419    0.6827    0.8351
Pt    0.1443    0.7248    0.7891
Pt    0.1441    0.7256    0.8340
Pt    0.1807    0.5214    0.7925
Pt    0.1829    0.5211    0.8338
Pt    0.1805    0.5605    0.7927
Pt    0.1854    0.5558    0.8391
Pt    0.1806    0.5994    0.7901
Pt    0.1857    0.5993    0.8324
Pt    0.1846    0.6410    0.7911
Pt    0.1823    0.6374    0.8312
Pt    0.1862    0.6808    0.7893
Pt    0.1843    0.6808    0.8329
Pt    0.1824    0.7205    0.7898
Pt    0.1860    0.7257    0.8337
Pt    0.2246    0.5171    0.7931
Pt    0.2249    0.5172    0.8349
Pt    0.2236    0.5575    0.7909
Pt    0.2246    0.5599    0.8360
Pt    0.2282    0.6006    0.7918
Pt    0.2239    0.5962    0.8318
Pt    0.1216    0.7046    0.7480
Pt    0.2464    0.6821    0.7681
Pt    0.2051    0.7457    0.8301
Pt    0.0214    0.5369    0.7468
Pt    0.0552    0.7436    0.7686
Pt    0.2032    0.5380    0.7477
Pt    0.2462    0.7024    0.8324
Pt    0.1642    0.7448    0.7484
Pt    0.1009    0.7246    0.8703
Pt    0.2452    0.5570    0.8115
Pt    0.1809    0.5583    0.7488
Pt    0.9974    0.5748    0.8703
Pt    0.1424    0.7227    0.8701
Pt    0.2449    0.6206    0.7910
Pt    0.1416    0.4996    0.8529
Pt    0.1208    0.7449    0.8704
Pt    0.2456    0.6222    0.8323
Pt    0.1428    0.7442    0.8527
Pt    0.0390    0.7444    0.8297
Pt    0.0164    0.6404    0.7482
Pt    0.1635    0.4978    0.7470
Pt    0.2230    0.5171    0.7485
Pt    0.1204    0.7039    0.8703
Pt    0.0999    0.7458    0.7686
Pt    0.1656    0.7445    0.8315
Pt    0.2462    0.5172    0.8154
Pt    0.2262    0.7442    0.8108
Pt    0.2450    0.4983    0.7930
Pt    0.1849    0.7435    0.7695
Pt    0.0780    0.7465    0.8313
Pt    0.0807    0.6623    0.8705
Pt    0.0598    0.6421    0.7486
Pt    0.2455    0.6197    0.7482
Pt    0.0402    0.6621    0.7486
Pt    0.2456    0.6001    0.8533
Pt    0.0587    0.6842    0.8714
Pt    0.0165    0.6430    0.8706
Pt    0.2259    0.6835    0.7482
Pt    0.1207    0.6187    0.7484
Pt    0.1436    0.7258    0.7468
Pt    0.0775    0.6207    0.7488
Pt    0.1624    0.6622    0.7476
Pt    0.2036    0.7043    0.7468
Pt    0.2281    0.7465    0.7690
Pt    0.1841    0.6801    0.8713
Pt    0.9970    0.6610    0.9581
Pt    0.1231    0.4997    0.9194
Pt    0.2265    0.7247    0.9540
Pt    0.0614    0.6412    0.8736
Pt    0.0589    0.7463    0.9771
Pt    0.1643    0.7033    0.8727
Pt    0.9969    0.7067    0.9954
Pt    0.0160    0.6841    0.8730
Pt    0.1440    0.6826    0.8750
Pt    0.2283    0.7426    0.8954
Pt    0.0580    0.4985    0.8929
Pt    0.0808    0.7034    0.8725
Pt    0.2463    0.6610    0.9953
Pt    0.0147    0.4968    0.8952
Pt    0.9988    0.5206    0.8909
Pt    0.1024    0.7457    0.9327
Pt    0.1825    0.6001    0.8744
Pt    0.0354    0.5360    0.9155
Pt    0.0365    0.5394    0.9532
Pt    0.0382    0.5817    0.9515
Pt    0.0367    0.6212    0.9517
Pt    0.9973    0.5551    0.8915
Pt    0.0387    0.6611    0.9134
Pt    0.0360    0.6625    0.9543
Pt    0.0591    0.4977    0.9760
Pt    0.0386    0.7028    0.9124
Pt    0.0388    0.7021    0.9548
Pt    0.1000    0.5008    0.8968
Pt    0.2032    0.7436    0.9110
Pt    0.9985    0.6399    0.8931
Pt    0.0183    0.6399    0.9953
Pt    0.0775    0.5400    0.9132
Pt    0.0788    0.5370    0.9521
Pt    0.1020    0.6379    0.8729
Pt    0.0803    0.6578    0.9097
Pt    0.0826    0.6607    0.9542
Pt    0.1190    0.5770    0.9960
Pt    0.0822    0.7039    0.9125
Pt    0.0809    0.7067    0.9554
Pt    0.1852    0.6390    0.9941
Pt    0.0591    0.7259    0.8741
Pt    0.1234    0.6616    0.8751
Pt    0.0983    0.5587    0.8751
Pt    0.1188    0.5434    0.9167
Pt    0.2276    0.6816    0.8743
Pt    0.1207    0.4996    0.8750
Pt    0.1214    0.5417    0.8789
Pt    0.1212    0.6590    0.9121
Pt    0.1231    0.6638    0.9544
Pt    0.0005    0.5968    0.8886
Pt    0.1243    0.7014    0.9130
Pt    0.1223    0.7016    0.9539
Pt    0.1824    0.6388    0.8740
Pt    0.1673    0.6617    0.9952
Pt    0.1621    0.7428    0.8721
Pt    0.1003    0.6808    0.9954
Pt    0.0760    0.5392    0.8845
Pt    0.9968    0.5983    0.9330
Pt    0.1652    0.6608    0.9126
Pt    0.1639    0.6604    0.9549
Pt    0.1428    0.4982    0.8967
Pt    0.1633    0.7038    0.9149
Pt    0.1650    0.7031    0.9554
Pt    0.2042    0.7032    0.8723
Pt    0.1021    0.6827    0.8722
Pt    0.1437    0.7455    0.9328
Pt    0.1647    0.7004    0.9951
Pt    0.1443    0.5589    0.8804
Pt    0.0777    0.5381    0.9955
Pt    0.2048    0.6594    0.9167
Pt    0.2041    0.6588    0.9554
Pt    0.9968    0.5364    0.9128
Pt    0.2065    0.7033    0.9147
Pt    0.2047    0.7050    0.9559
Pt    0.0576    0.7242    0.9955
Pt    0.0172    0.7266    0.8732
Pt    0.1430    0.5207    0.8758
Pt    0.2279    0.7225    0.9146
Pt    0.1437    0.6398    0.8735
Pt    0.2270    0.6011    0.8743
Pt    0.0596    0.5964    0.9925
Pt    0.0810    0.4975    0.9566
Pt    0.1433    0.7232    0.9549
Pt    0.2073    0.7460    0.8774
Pt    0.0389    0.7456    0.8730
Pt    0.1005    0.4993    0.9780
Pt    0.1190    0.6154    0.8744
Pt    0.2262    0.6808    0.9569
Pt    0.2264    0.6768    0.9152
Pt    0.0371    0.7464    0.9559
Pt    0.2243    0.6381    0.9550
Pt    0.1026    0.7247    0.9554
Pt    0.2248    0.7460    0.9329
Pt    0.2246    0.6413    0.9148
Pt    0.1029    0.7247    0.9129
Pt    0.1227    0.5789    0.8724
Pt    0.1865    0.7456    0.9792
Pt    0.2464    0.7030    0.9554
Pt    0.0860    0.5783    0.9917
Pt    0.0785    0.7451    0.8730
Pt    0.0391    0.6637    0.8716
Pt    0.0150    0.7462    0.9773
Pt    0.2462    0.7010    0.9130
Pt    0.0381    0.7036    0.8730
Pt    0.1593    0.6159    0.9942
Pt    0.1649    0.6595    0.8718
Pt    0.1458    0.6838    0.9543
Pt    0.0992    0.6414    0.9910
Pt    0.0386    0.5162    0.8961
Pt    0.0327    0.5163    0.9358
Pt    0.0367    0.5150    0.9769
Pt    0.0365    0.5584    0.9341
Pt    0.0346    0.5615    0.9727
Pt    0.0399    0.6006    0.9334
Pt    0.0369    0.6009    0.9709
Pt    0.0371    0.6397    0.8902
Pt    0.0394    0.6401    0.9331
Pt    0.0378    0.6416    0.9733
Pt    0.0369    0.6835    0.8927
Pt    0.0366    0.6814    0.9347
Pt    0.0369    0.6844    0.9745
Pt    0.0379    0.7268    0.8931
Pt    0.0374    0.7250    0.9365
Pt    0.0369    0.7262    0.9762
Pt    0.0786    0.5162    0.8973
Pt    0.0803    0.5168    0.9352
Pt    0.0800    0.5204    0.9734
Pt    0.0779    0.5556    0.9746
Pt    0.0796    0.5971    0.9715
Pt    0.0819    0.6353    0.8926
Pt    0.0796    0.6408    0.9336
Pt    0.0826    0.6370    0.9696
Pt    0.0791    0.6823    0.8918
Pt    0.0800    0.6813    0.9307
Pt    0.0809    0.6825    0.9728
Pt    0.0815    0.7236    0.8936
Pt    0.0831    0.7246    0.9331
Pt    0.0804    0.7280    0.9759
Pt    0.1204    0.5194    0.8968
Pt    0.1181    0.5641    0.8954
Pt    0.1223    0.6408    0.8912
Pt    0.1237    0.6402    0.9758
Pt    0.1222    0.6825    0.8936
Pt    0.1214    0.6822    0.9340
Pt    0.1221    0.6826    0.9755
Pt    0.1236    0.7243    0.8899
Pt    0.1242    0.7247    0.9329
Pt    0.1233    0.7244    0.9774
Pt    0.1428    0.5801    0.8976
Pt    0.1630    0.6394    0.8937
Pt    0.1625    0.6402    0.9328
Pt    0.1645    0.6413    0.9719
Pt    0.1661    0.6806    0.8919
Pt    0.1642    0.6787    0.9346
Pt    0.1643    0.6831    0.9742
Pt    0.1648    0.7224    0.8940
Pt    0.1639    0.7229    0.9337
Pt    0.1657    0.7243    0.9766
Pt    0.2045    0.5997    0.8956
Pt    0.2039    0.6382    0.8934
Pt    0.2073    0.6789    0.8914
Pt    0.2068    0.6831    0.9363
Pt    0.2052    0.6819    0.9761
Pt    0.2048    0.7217    0.8929
Pt    0.2082    0.7254    0.9330
Pt    0.2075    0.7243    0.9780
Pt    0.0994    0.6855    0.9541
Pt    0.1456    0.7443    0.9791
Pt    0.1633    0.5789    0.8738
Pt    0.2048    0.6182    0.8738
Pt    0.1660    0.5032    0.8751
Pt    0.1401    0.7462    0.8909
Pt    0.1825    0.7444    0.8923
Pt    0.2249    0.6391    0.9954
Pt    0.0999    0.6785    0.9139
Pt    0.1842    0.7237    0.9558
Pt    0.1852    0.7215    0.9132
Pt    0.0141    0.5373    0.9355
Pt    0.0164    0.5384    0.9763
Pt    0.0187    0.5804    0.9300
Pt    0.0152    0.5820    0.9738
Pt    0.0167    0.6199    0.9328
Pt    0.0162    0.6205    0.9757
Pt    0.0186    0.6619    0.8932
Pt    0.0153    0.6637    0.9341
Pt    0.0175    0.6606    0.9756
Pt    0.0174    0.7072    0.8925
Pt    0.0175    0.7056    0.9343
Pt    0.0179    0.7064    0.9759
Pt    0.0811    0.7457    0.9137
Pt    0.2461    0.6417    0.9340
Pt    0.2255    0.7242    0.8747
Pt    0.0569    0.5395    0.9352
Pt    0.0551    0.5381    0.9741
Pt    0.0614    0.5784    0.9723
Pt    0.0608    0.6209    0.9326
Pt    0.0595    0.6169    0.9684
Pt    0.0596    0.6613    0.8925
Pt    0.0621    0.6630    0.9331
Pt    0.0596    0.6615    0.9727
Pt    0.0595    0.7042    0.8936
Pt    0.0634    0.7050    0.9327
Pt    0.0608    0.7068    0.9751
Pt    0.1210    0.7460    0.9117
Pt    0.1049    0.6353    0.9526
Pt    0.2029    0.5801    0.8737
Pt    0.1007    0.5410    0.8967
Pt    0.1002    0.6623    0.8915
Pt    0.1025    0.6581    0.9340
Pt    0.1025    0.6611    0.9746
Pt    0.1038    0.7027    0.8943
Pt    0.1002    0.7039    0.9331
Pt    0.1016    0.7047    0.9766
Pt    0.1020    0.6395    0.9125
Pt    0.1628    0.7418    0.9551
Pt    0.1213    0.6611    0.9963
Pt    0.1387    0.5390    0.8994
Pt    0.1424    0.6612    0.8946
Pt    0.1429    0.6607    0.9335
Pt    0.1423    0.6608    0.9745
Pt    0.1444    0.7041    0.8940
Pt    0.1441    0.7012    0.9333
Pt    0.1431    0.7027    0.9751
Pt    0.1430    0.6198    0.8926
Pt    0.1418    0.6365    0.9151
Pt    0.1016    0.5208    0.9584
Pt    0.1625    0.6003    0.8978
Pt    0.1825    0.6183    0.8954
Pt    0.1851    0.6591    0.8937
Pt    0.1845    0.6608    0.9344
Pt    0.1855    0.6593    0.9749
Pt    0.1857    0.7005    0.8933
Pt    0.1848    0.7040    0.9367
Pt    0.1865    0.7027    0.9775
Pt    0.0795    0.6633    0.9931
Pt    0.1024    0.5207    0.9178
Pt    0.1031    0.7436    0.9769
Pt    0.2254    0.6172    0.8972
Pt    0.2271    0.6598    0.8931
Pt    0.2245    0.6585    0.9367
Pt    0.2228    0.6581    0.9755
Pt    0.2248    0.7019    0.8943
Pt    0.2287    0.7024    0.9345
Pt    0.2278    0.7055    0.9751
Pt    0.1427    0.5981    0.8754
Pt    0.1864    0.7240    0.8725
Pt    0.1450    0.6805    0.9128
Pt    0.0171    0.5166    0.9128
Pt    0.0158    0.5178    0.9570
Pt    0.0153    0.5581    0.9119
Pt    0.0153    0.5612    0.9537
Pt    0.0377    0.6198    0.9132
Pt    0.0136    0.6013    0.9543
Pt    0.1425    0.6412    0.9531
Pt    0.0196    0.6402    0.9149
Pt    0.0169    0.6419    0.9518
Pt    0.1857    0.6813    0.9562
Pt    0.0178    0.6856    0.9130
Pt    0.0168    0.6840    0.9544
Pt    0.1845    0.6834    0.9153
Pt    0.0190    0.7277    0.9142
Pt    0.0160    0.7267    0.9543
Pt    0.0568    0.5189    0.9162
Pt    0.0567    0.5186    0.9541
Pt    0.0569    0.5609    0.9532
Pt    0.0817    0.6144    0.9509
Pt    0.0583    0.6397    0.9127
Pt    0.0578    0.6394    0.9539
Pt    0.1414    0.7252    0.9115
Pt    0.0582    0.6821    0.9104
Pt    0.0618    0.6844    0.9503
Pt    0.1643    0.7449    0.9124
Pt    0.0578    0.7268    0.9179
Pt    0.0591    0.7276    0.9561
Pt    0.1839    0.6384    0.9171
Pt    0.1016    0.4994    0.9383
Pt    0.1850    0.7404    0.9344
Pt    0.2044    0.7428    0.9553
Pt    0.0800    0.7037    0.9959
Pt    0.0767    0.5004    0.8723
Pt    0.0371    0.5799    0.9936
Pt    0.1235    0.7456    0.9522
Pt    0.1448    0.6445    0.9952
Pt    0.1191    0.6210    0.9955
Pt    0.2289    0.7256    0.9957
Pt    0.1611    0.6187    0.8736
Pt    0.0175    0.5611    0.9944
Pt    0.0986    0.5539    0.9931
Pt    0.2452    0.6611    0.9561
Pt    0.0576    0.5593    0.9920
Pt    0.0390    0.6194    0.9905
Pt    0.0583    0.6421    0.9936
Pt    0.2024    0.6608    0.8726
Pt    0.2254    0.6394    0.8757
Pt    0.2458    0.5756    0.8758
Pt    0.0586    0.6837    0.9944
Pt    0.0770    0.6213    0.9904
Pt    0.0379    0.5386    0.9949
Pt    0.0989    0.5233    0.8757
Pt    0.2453    0.5968    0.8968
Pt    0.1014    0.6006    0.9918
Pt    0.0989    0.5182    0.9962
Pt    0.1866    0.6818    0.9962
Pt    0.1411    0.5948    0.9960
Pt    0.0167    0.5182    0.9951
Pt    0.2058    0.6606    0.9962
Pt    0.2464    0.6614    0.9132
Pt    0.9972    0.6198    0.8716
Pt    0.1858    0.8727    0.0198
Pt    0.2266    0.9759    0.0777
Pt    0.2254    0.9767    0.0412
Pt    0.1864    0.8291    0.1002
Pt    0.1852    0.8298    0.0585
Pt    0.2282    0.9316    0.0812
Pt    0.2269    0.9330    0.0387
Pt    0.1830    0.8281    0.0162
Pt    0.1777    0.7869    0.0993
Pt    0.2265    0.8913    0.0804
Pt    0.2272    0.8936    0.0389
Pt    0.1832    0.7889    0.0582
Pt    0.1440    0.8314    0.0603
Pt    0.2273    0.8503    0.0749
Pt    0.2230    0.8517    0.0360
Pt    0.1846    0.7849    0.0160
Pt    0.9988    0.7877    0.0390
Pt    0.2287    0.8090    0.0798
Pt    0.2277    0.8107    0.0383
Pt    0.1420    0.9541    0.1023
Pt    0.1438    0.9550    0.0597
Pt    0.0385    0.7902    0.0399
Pt    0.0356    0.7895    0.0820
Pt    0.1426    0.9546    0.0175
Pt    0.1427    0.9118    0.0996
Pt    0.0385    0.8294    0.0362
Pt    0.0416    0.8314    0.0835
Pt    0.1435    0.9142    0.0585
Pt    0.1458    0.9173    0.0158
Pt    0.0393    0.8694    0.0358
Pt    0.0393    0.8703    0.0792
Pt    0.1001    0.9353    0.0814
Pt    0.0994    0.9345    0.0381
Pt    0.0381    0.9160    0.0367
Pt    0.0384    0.9142    0.0809
Pt    0.1016    0.8955    0.0772
Pt    0.1021    0.8920    0.0358
Pt    0.0388    0.9565    0.0392
Pt    0.0399    0.9594    0.0828
Pt    0.1027    0.8544    0.0786
Pt    0.1030    0.8511    0.0360
Pt    0.0785    0.7877    0.0380
Pt    0.0777    0.7872    0.0773
Pt    0.1034    0.8082    0.0765
Pt    0.1019    0.8088    0.0397
Pt    0.0821    0.8274    0.0350
Pt    0.0824    0.8292    0.0785
Pt    0.0983    0.7689    0.0809
Pt    0.0997    0.7671    0.0382
Pt    0.0787    0.8717    0.0383
Pt    0.0835    0.8743    0.0779
Pt    0.0601    0.9797    0.0807
Pt    0.0597    0.9792    0.0350
Pt    0.0797    0.9150    0.0386
Pt    0.0808    0.9161    0.0786
Pt    0.0619    0.9365    0.0808
Pt    0.0600    0.9343    0.0378
Pt    0.0829    0.9574    0.0405
Pt    0.0813    0.9563    0.0776
Pt    0.0623    0.8942    0.0835
Pt    0.0581    0.8925    0.0386
Pt    0.1214    0.7865    0.0395
Pt    0.1237    0.7870    0.0792
Pt    0.1431    0.8296    0.0162
Pt    0.0599    0.8508    0.0773
Pt    0.1222    0.8312    0.0380
Pt    0.1225    0.8308    0.0789
Pt    0.1418    0.8722    0.0999
Pt    0.0603    0.8486    0.0368
Pt    0.1222    0.8710    0.0374
Pt    0.1232    0.8736    0.0775
Pt    0.1449    0.8739    0.0576
Pt    0.0596    0.8108    0.0804
Pt    0.1221    0.9135    0.0363
Pt    0.1245    0.9133    0.0799
Pt    0.0593    0.8091    0.0398
Pt    0.0573    0.7695    0.0829
Pt    0.1203    0.9573    0.0387
Pt    0.1206    0.9575    0.0806
Pt    0.0575    0.7681    0.0386
Pt    0.0174    0.9766    0.0823
Pt    0.1623    0.7905    0.0382
Pt    0.1632    0.7925    0.0787
Pt    0.9967    0.8935    0.0991
Pt    0.0193    0.9760    0.0379
Pt    0.1658    0.8294    0.0364
Pt    0.1656    0.8272    0.0786
Pt    0.1437    0.7888    0.1020
Pt    0.0176    0.9348    0.0797
Pt    0.1639    0.8725    0.0373
Pt    0.1656    0.8706    0.0794
Pt    0.1431    0.8713    0.0157
Pt    0.0192    0.9361    0.0390
Pt    0.1653    0.9161    0.0354
Pt    0.1653    0.9126    0.0799
Pt    0.0182    0.8927    0.0780
Pt    0.0169    0.8959    0.0412
Pt    0.1660    0.9578    0.0360
Pt    0.1646    0.9562    0.0801
Pt    0.0193    0.8507    0.0811
Pt    0.0188    0.8512    0.0378
Pt    0.2032    0.7867    0.0371
Pt    0.2069    0.7904    0.0766
Pt    0.9965    0.8098    0.1016
Pt    0.0154    0.8108    0.0809
Pt    0.2050    0.8270    0.0368
Pt    0.2063    0.8293    0.0806
Pt    0.0365    0.7471    0.0396
Pt    0.0175    0.8071    0.0397
Pt    0.2063    0.8735    0.0386
Pt    0.2037    0.8720    0.0784
Pt    0.1421    0.7866    0.0586
Pt    0.0179    0.7682    0.0842
Pt    0.2059    0.9148    0.0388
Pt    0.2065    0.9131    0.0813
Pt    0.0175    0.7667    0.0430
Pt    0.2278    0.9550    0.0987
Pt    0.2068    0.9561    0.0397
Pt    0.2056    0.9546    0.0798
Pt    0.2271    0.9523    0.0606
Pt    0.9987    0.9370    0.0578
Pt    0.2264    0.7695    0.0784
Pt    0.2268    0.7697    0.0367
Pt    0.2304    0.9538    0.0183
Pt    0.2235    0.9107    0.1024
Pt    0.1847    0.9778    0.0799
Pt    0.1855    0.9774    0.0389
Pt    0.2279    0.9111    0.0626
Pt    0.2290    0.9119    0.0162
Pt    0.1847    0.9353    0.0794
Pt    0.1868    0.9373    0.0414
Pt    0.2254    0.8700    0.0984
Pt    0.2265    0.8707    0.0576
Pt    0.1836    0.8934    0.0817
Pt    0.1850    0.8956    0.0393
Pt    0.2263    0.8729    0.0178
Pt    0.1429    0.7862    0.0197
Pt    0.1837    0.8480    0.0785
Pt    0.1846    0.8507    0.0383
Pt    0.2261    0.8279    0.1015
Pt    0.0001    0.9745    0.0613
Pt    0.1859    0.8064    0.0804
Pt    0.1839    0.8068    0.0340
Pt    0.2275    0.8291    0.0584
Pt    0.2050    0.9152    0.9998
Pt    0.1813    0.7687    0.0763
Pt    0.1866    0.7641    0.0375
Pt    0.2308    0.8313    0.0173
Pt    0.2244    0.7871    0.0992
Pt    0.1441    0.9770    0.0789
Pt    0.1410    0.9769    0.0377
Pt    0.2306    0.7892    0.0570
Pt    0.2260    0.7900    0.0170
Pt    0.1428    0.9349    0.0807
Pt    0.1413    0.9359    0.0402
Pt    0.1879    0.9530    0.1025
Pt    0.1851    0.9579    0.0597
Pt    0.1441    0.8927    0.0789
Pt    0.0365    0.7683    0.0177
Pt    0.0378    0.7665    0.0617
Pt    0.0380    0.7669    0.1036
Pt    0.0376    0.8080    0.0174
Pt    0.0384    0.8095    0.0615
Pt    0.0364    0.8091    0.1014
Pt    0.0401    0.8497    0.0147
Pt    0.0389    0.8517    0.0588
Pt    0.0396    0.8520    0.1023
Pt    0.0392    0.8924    0.0192
Pt    0.0400    0.8923    0.0598
Pt    0.0409    0.8915    0.0996
Pt    0.0382    0.9346    0.0156
Pt    0.0409    0.9366    0.0613
Pt    0.0401    0.9353    0.0997
Pt    0.0391    0.9767    0.0173
Pt    0.0401    0.9771    0.0602
Pt    0.0382    0.9810    0.1025
Pt    0.0767    0.7668    0.0161
Pt    0.0802    0.7673    0.0593
Pt    0.0794    0.7682    0.1012
Pt    0.0805    0.8072    0.0183
Pt    0.0798    0.8087    0.0606
Pt    0.0803    0.8085    0.1025
Pt    0.0817    0.8487    0.0158
Pt    0.0814    0.8506    0.0563
Pt    0.0836    0.8509    0.1017
Pt    0.0821    0.8934    0.0179
Pt    0.0797    0.8946    0.0589
Pt    0.0838    0.8931    0.1010
Pt    0.0801    0.9366    0.0167
Pt    0.0799    0.9340    0.0589
Pt    0.0771    0.9344    0.1022
Pt    0.0794    0.9775    0.0186
Pt    0.0805    0.9762    0.0585
Pt    0.0805    0.9773    0.1034
Pt    0.1220    0.7663    0.0152
Pt    0.1199    0.7650    0.0603
Pt    0.1199    0.7631    0.1006
Pt    0.1240    0.8079    0.0179
Pt    0.1232    0.8103    0.0592
Pt    0.1226    0.8073    0.0987
Pt    0.1238    0.8515    0.0158
Pt    0.1222    0.8514    0.0576
Pt    0.1221    0.8523    0.0977
Pt    0.1232    0.8921    0.0169
Pt    0.1226    0.8940    0.0580
Pt    0.1212    0.8937    0.0987
Pt    0.1212    0.9361    0.0166
Pt    0.1217    0.9356    0.0604
Pt    0.1214    0.9346    0.1006
Pt    0.1203    0.9771    0.0151
Pt    0.1219    0.9804    0.0607
Pt    0.1224    0.9753    0.1021
Pt    0.1640    0.7666    0.0182
Pt    0.1636    0.7649    0.0549
Pt    0.1620    0.7652    0.0975
Pt    0.1621    0.8047    0.0133
Pt    0.1665    0.8090    0.0559
Pt    0.1635    0.8090    0.1030
Pt    0.1636    0.8507    0.0179
Pt    0.1620    0.8508    0.0575
Pt    0.1646    0.8515    0.1003
Pt    0.1637    0.8924    0.0170
Pt    0.1640    0.8937    0.0614
Pt    0.1626    0.8919    0.1008
Pt    0.1675    0.9375    0.0185
Pt    0.1637    0.9348    0.0564
Pt    0.1623    0.9354    0.1004
Pt    0.1682    0.9784    0.0158
Pt    0.1626    0.9778    0.0589
Pt    0.1631    0.9752    0.0996
Pt    0.2068    0.7652    0.0154
Pt    0.2067    0.7671    0.0570
Pt    0.2028    0.7680    0.0943
Pt    0.2070    0.8102    0.0156
Pt    0.2073    0.8074    0.0556
Pt    0.2061    0.8070    0.1004
Pt    0.2022    0.8488    0.0178
Pt    0.2042    0.8494    0.0589
Pt    0.2046    0.8483    0.1007
Pt    0.2037    0.8952    0.0176
Pt    0.2051    0.8943    0.0594
Pt    0.2052    0.8909    0.0996
Pt    0.2060    0.9364    0.0192
Pt    0.2071    0.9317    0.0608
Pt    0.2047    0.9322    0.1027
Pt    0.2071    0.9762    0.0168
Pt    0.2063    0.9765    0.0612
Pt    0.2049    0.9752    0.0978
Pt    0.1438    0.8947    0.0378
Pt    0.1867    0.9578    0.0165
Pt    0.1455    0.8315    0.1010
Pt    0.1428    0.8533    0.0777
Pt    0.1440    0.8488    0.0376
Pt    0.1842    0.9122    0.1031
Pt    0.0966    0.9552    0.1004
Pt    0.1429    0.8110    0.0788
Pt    0.1435    0.8095    0.0403
Pt    0.1831    0.9154    0.0595
Pt    0.1030    0.9561    0.0593
Pt    0.1474    0.7676    0.0761
Pt    0.1425    0.7659    0.0370
Pt    0.1863    0.9173    0.0188
Pt    0.1850    0.8718    0.1013
Pt    0.1007    0.9791    0.0812
Pt    0.1015    0.9787    0.0385
Pt    0.1833    0.8732    0.0577
Pt    0.0162    0.7866    0.0165
Pt    0.0181    0.7893    0.0601
Pt    0.0148    0.7878    0.1040
Pt    0.0157    0.8327    0.0173
Pt    0.0180    0.8302    0.0608
Pt    0.0161    0.8297    0.1038
Pt    0.0182    0.8731    0.0194
Pt    0.0177    0.8728    0.0583
Pt    0.0178    0.8704    0.1004
Pt    0.0180    0.9144    0.0172
Pt    0.0188    0.9153    0.0594
Pt    0.0201    0.9116    0.1007
Pt    0.0181    0.9569    0.0177
Pt    0.0198    0.9567    0.0613
Pt    0.0186    0.9565    0.1022
Pt    0.0591    0.7895    0.0167
Pt    0.0586    0.7885    0.0594
Pt    0.0585    0.7920    0.1006
Pt    0.0594    0.8278    0.0154
Pt    0.0573    0.8288    0.0600
Pt    0.0632    0.8319    0.1003
Pt    0.0600    0.8718    0.0163
Pt    0.0600    0.8719    0.0594
Pt    0.0615    0.8692    0.0989
Pt    0.0588    0.9131    0.0171
Pt    0.0576    0.9149    0.0587
Pt    0.0590    0.9144    0.1018
Pt    0.0602    0.9568    0.0183
Pt    0.0591    0.9569    0.0570
Pt    0.0621    0.9552    0.1006
Pt    0.1027    0.7889    0.0198
Pt    0.1005    0.7882    0.0583
Pt    0.1016    0.7907    0.0978
Pt    0.1035    0.8279    0.0172
Pt    0.1013    0.8308    0.0586
Pt    0.1024    0.8301    0.1010
Pt    0.1023    0.8702    0.0164
Pt    0.1022    0.8733    0.0551
Pt    0.1023    0.8721    0.0981
Pt    0.1021    0.9135    0.0181
Pt    0.0999    0.9151    0.0582
Pt    0.1016    0.9134    0.1003
Pt    0.1011    0.9573    0.0169
Pt    0.0580    0.7489    0.0587
Pt    0.2256    0.8506    0.9984
Pt    0.1658    0.7473    0.9979
Pt    0.0158    0.7479    0.0190
Pt    0.0184    0.8911    0.9991
Pt    0.1683    0.9148    0.9986
Pt    0.0360    0.7479    0.1214
Pt    0.9988    0.9355    0.1007
Pt    0.9977    0.9170    0.0408
Pt    0.9986    0.8505    0.0586
Pt    0.2446    0.7888    0.1170
Pt    0.2459    0.7658    0.0995
Pt    0.1230    0.9146    0.9985
Pt    0.9989    0.9341    0.0197
Pt    0.2283    0.9351    0.9985
Pt    0.2458    0.8483    0.1023
Pt    0.9980    0.8525    0.1011
Pt    0.1021    0.7475    0.0160
Pt    0.2286    0.7482    0.0573
Pt    0.9985    0.9574    0.0388
Pt    0.0824    0.8726    0.9973
Pt    0.9983    0.7873    0.0792
Pt    0.1651    0.8720    0.9983
Pt    0.1818    0.7651    0.1194
Pt    0.0598    0.9342    0.9975
Pt    0.1638    0.9965    0.0385
Pt    0.2077    0.8728    0.9978
Pt    0.1429    0.8949    0.9984
Pt    0.1210    0.7485    0.0353
Pt    0.1645    0.9561    0.9969
Pt    0.2249    0.8109    0.9970
Pt    0.1430    0.7648    0.1201
Pt    0.2271    0.7479    0.0976
Pt    0.0813    0.8705    0.1202
Pt    0.1444    0.9952    0.0162
Pt    0.0578    0.7677    0.9975
Pt    0.1984    0.7891    0.1204
Pt    0.1216    0.9569    0.9982
Pt    0.2062    0.9946    0.1206
Pt    0.0581    0.9769    0.9970
Pt    0.0590    0.8938    0.9969
Pt    0.2286    0.9950    0.1009
Pt    0.2112    0.9567    0.9983
Pt    0.1611    0.8698    0.1209
Pt    0.1425    0.9321    0.1200
Pt    0.9965    0.8331    0.0820
Pt    0.9989    0.8954    0.0194
Pt    0.0412    0.8721    0.9971
Pt    0.1029    0.8915    0.1203
Pt    0.1029    0.8944    0.9967
Pt    0.9974    0.8084    0.0174
Pt    0.2045    0.7497    0.1164
Pt    0.9985    0.9773    0.0196
Pt    0.1834    0.9332    0.1215
Pt    0.2287    0.9797    0.9977
Pt    0.0577    0.8103    0.1211
Pt    0.1424    0.8499    0.1194
Pt    0.1180    0.8682    0.1205
Pt    0.0362    0.7473    0.9984
Pt    0.1217    0.8278    0.1199
Pt    0.2229    0.7698    0.1188
Pt    0.0830    0.8287    0.1201
Pt    0.1229    0.9123    0.1211
Pt    0.0158    0.8909    0.1195
Pt    0.1220    0.7851    0.1196
Pt    0.9978    0.8524    0.0190
Pt    0.2084    0.9537    0.1213
Pt    0.1258    0.7859    0.9969
Pt    0.9972    0.9752    0.1019
Pt    0.0800    0.7883    0.1194
Pt    0.1414    0.8935    0.1206
Pt    0.0428    0.9595    0.1206
Pt    0.1421    0.8093    0.1205
Pt    0.0186    0.9346    0.1195
Pt    0.2278    0.9348    0.1201
Pt    0.2271    0.9759    0.1210
Pt    0.0389    0.7896    0.1212
Pt    0.1040    0.9750    0.1208
Pt    0.1018    0.9318    0.1205
Pt    0.9987    0.9549    0.1214
Pt    0.2439    0.7490    0.1216
Pt    0.1846    0.8110    0.1214
Pt    0.1654    0.9560    0.1216
Pt    0.0807    0.9171    0.9967
Pt    0.1012    0.8058    0.2071
Pt    0.2265    0.9764    0.2091
Pt    0.2258    0.9782    0.1654
Pt    0.0998    0.8085    0.1673
Pt    0.2240    0.9366    0.2050
Pt    0.2245    0.9367    0.1630
Pt    0.1016    0.7689    0.2076
Pt    0.2277    0.8922    0.2048
Pt    0.2273    0.8902    0.1649
Pt    0.1010    0.7675    0.1647
Pt    0.2257    0.8501    0.2077
Pt    0.2248    0.8524    0.1604
Pt    0.0602    0.9764    0.2056
Pt    0.2252    0.8102    0.2044
Pt    0.2259    0.8123    0.1616
Pt    0.0385    0.7872    0.1621
Pt    0.0358    0.7851    0.2052
Pt    0.0618    0.9763    0.1610
Pt    0.0390    0.8296    0.1632
Pt    0.0360    0.8296    0.2045
Pt    0.0587    0.9338    0.2048
Pt    0.0397    0.8732    0.1662
Pt    0.0380    0.8717    0.2046
Pt    0.0583    0.9349    0.1638
Pt    0.0384    0.9122    0.1653
Pt    0.0383    0.9141    0.2086
Pt    0.0585    0.8913    0.2059
Pt    0.0376    0.9539    0.1609
Pt    0.0402    0.9563    0.2044
Pt    0.0589    0.8914    0.1621
Pt    0.0788    0.7909    0.1647
Pt    0.0809    0.7852    0.2057
Pt    0.0580    0.8482    0.2079
Pt    0.0802    0.8286    0.1673
Pt    0.0754    0.8278    0.2097
Pt    0.0579    0.8506    0.1631
Pt    0.0787    0.8692    0.1662
Pt    0.0786    0.8703    0.2063
Pt    0.0533    0.8081    0.2048
Pt    0.0803    0.9127    0.1626
Pt    0.0798    0.9137    0.2060
Pt    0.0580    0.8095    0.1648
Pt    0.0829    0.9538    0.1640
Pt    0.0795    0.9531    0.2049
Pt    0.0605    0.7656    0.2041
Pt    0.1223    0.7895    0.1657
Pt    0.1248    0.7882    0.2083
Pt    0.0594    0.7651    0.1628
Pt    0.1201    0.8313    0.1638
Pt    0.1216    0.8312    0.2073
Pt    0.0192    0.9725    0.2065
Pt    0.1218    0.8713    0.1650
Pt    0.1198    0.8743    0.2071
Pt    0.0212    0.9775    0.1652
Pt    0.1189    0.9120    0.1637
Pt    0.1213    0.9148    0.2063
Pt    0.0184    0.9346    0.2036
Pt    0.1233    0.9553    0.1619
Pt    0.1212    0.9526    0.2048
Pt    0.0192    0.9328    0.1640
Pt    0.1613    0.7886    0.1613
Pt    0.1629    0.7881    0.2043
Pt    0.0172    0.8910    0.2060
Pt    0.1622    0.8305    0.1610
Pt    0.1633    0.8323    0.2067
Pt    0.0143    0.8902    0.1641
Pt    0.1618    0.8712    0.1642
Pt    0.1616    0.8722    0.2067
Pt    0.0171    0.8516    0.2064
Pt    0.1627    0.9109    0.1637
Pt    0.1647    0.9140    0.2080
Pt    0.0164    0.8485    0.1641
Pt    0.1644    0.9516    0.1633
Pt    0.1620    0.9543    0.2067
Pt    0.0158    0.8054    0.2071
Pt    0.2050    0.7920    0.1647
Pt    0.2041    0.7890    0.2034
Pt    0.0179    0.8095    0.1612
Pt    0.2044    0.8305    0.1637
Pt    0.2021    0.8321    0.2062
Pt    0.0174    0.7658    0.2042
Pt    0.2054    0.8714    0.1634
Pt    0.2059    0.8736    0.2091
Pt    0.0154    0.7667    0.1655
Pt    0.2082    0.9100    0.1662
Pt    0.2073    0.9137    0.2027
Pt    0.2263    0.9547    0.2280
Pt    0.2050    0.9554    0.1626
Pt    0.2029    0.9561    0.2094
Pt    0.2262    0.9589    0.1840
Pt    0.2240    0.9551    0.1434
Pt    0.2222    0.7684    0.2035
Pt    0.2246    0.7685    0.1610
Pt    0.2259    0.9145    0.2240
Pt    0.1823    0.9752    0.2061
Pt    0.1825    0.9758    0.1671
Pt    0.2288    0.9157    0.1833
Pt    0.1841    0.9351    0.2062
Pt    0.1877    0.9315    0.1630
Pt    0.2239    0.9145    0.1456
Pt    0.1822    0.8931    0.2068
Pt    0.1860    0.8930    0.1632
Pt    0.2282    0.8727    0.2264
Pt    0.1818    0.8532    0.2068
Pt    0.1857    0.8494    0.1666
Pt    0.2240    0.8721    0.1852
Pt    0.1828    0.8108    0.2086
Pt    0.1816    0.8091    0.1641
Pt    0.2273    0.8720    0.1424
Pt    0.1805    0.7688    0.2046
Pt    0.1815    0.7683    0.1614
Pt    0.2247    0.8316    0.2264
Pt    0.1434    0.9777    0.2061
Pt    0.1436    0.9741    0.1640
Pt    0.2237    0.8315    0.1847
Pt    0.1436    0.9328    0.2065
Pt    0.1441    0.9325    0.1651
Pt    0.2269    0.8304    0.1410
Pt    0.1429    0.8944    0.2059
Pt    0.1400    0.8925    0.1623
Pt    0.2260    0.7918    0.2245
Pt    0.1395    0.8521    0.2067
Pt    0.1431    0.8506    0.1649
Pt    0.0352    0.7665    0.1440
Pt    0.0369    0.7667    0.1823
Pt    0.0389    0.7666    0.2270
Pt    0.0400    0.8089    0.1423
Pt    0.0354    0.8069    0.1847
Pt    0.0346    0.8079    0.2270
Pt    0.0389    0.8504    0.1435
Pt    0.0381    0.8518    0.1855
Pt    0.0371    0.8502    0.2272
Pt    0.0387    0.8935    0.1426
Pt    0.0381    0.8959    0.1870
Pt    0.0383    0.8915    0.2251
Pt    0.0382    0.9357    0.1377
Pt    0.0388    0.9342    0.1850
Pt    0.0380    0.9377    0.2283
Pt    0.0380    0.9776    0.1417
Pt    0.0434    0.9769    0.1840
Pt    0.0376    0.9772    0.2267
Pt    0.0796    0.7673    0.1431
Pt    0.0786    0.7685    0.1827
Pt    0.0809    0.7663    0.2283
Pt    0.0799    0.8109    0.1443
Pt    0.0783    0.8074    0.1886
Pt    0.0772    0.8079    0.2260
Pt    0.0809    0.8508    0.1441
Pt    0.0762    0.8490    0.1858
Pt    0.0787    0.8521    0.2268
Pt    0.0789    0.8911    0.1423
Pt    0.0777    0.8922    0.1826
Pt    0.0797    0.8932    0.2289
Pt    0.0809    0.9343    0.1434
Pt    0.0802    0.9312    0.1852
Pt    0.0825    0.9376    0.2264
Pt    0.0827    0.9748    0.1422
Pt    0.0789    0.9773    0.1857
Pt    0.0815    0.9761    0.2252
Pt    0.1200    0.7657    0.1432
Pt    0.1208    0.7677    0.1857
Pt    0.1259    0.7653    0.2256
Pt    0.1225    0.8071    0.1417
Pt    0.1235    0.8090    0.1862
Pt    0.1206    0.8105    0.2273
Pt    0.1225    0.8525    0.1442
Pt    0.1218    0.8507    0.1857
Pt    0.1208    0.8535    0.2271
Pt    0.1201    0.8923    0.1421
Pt    0.1242    0.8938    0.1842
Pt    0.1212    0.8954    0.2264
Pt    0.1219    0.9335    0.1401
Pt    0.1217    0.9337    0.1826
Pt    0.1208    0.9350    0.2272
Pt    0.1224    0.9748    0.1454
Pt    0.1236    0.9747    0.1848
Pt    0.1221    0.9759    0.2279
Pt    0.1642    0.7663    0.1398
Pt    0.1617    0.7661    0.1809
Pt    0.1610    0.7695    0.2271
Pt    0.1622    0.8101    0.1420
Pt    0.1599    0.8110    0.1833
Pt    0.1633    0.8120    0.2288
Pt    0.1622    0.8524    0.1424
Pt    0.1627    0.8528    0.1852
Pt    0.1614    0.8537    0.2263
Pt    0.1641    0.8910    0.1425
Pt    0.1634    0.8891    0.1856
Pt    0.1612    0.8953    0.2322
Pt    0.1636    0.9325    0.1411
Pt    0.1645    0.9338    0.1853
Pt    0.1620    0.9333    0.2285
Pt    0.1638    0.9760    0.1451
Pt    0.1627    0.9773    0.1873
Pt    0.1633    0.9761    0.2267
Pt    0.2034    0.7688    0.1398
Pt    0.2021    0.7686    0.1817
Pt    0.2039    0.7689    0.2245
Pt    0.2035    0.8093    0.1446
Pt    0.2010    0.8120    0.1871
Pt    0.2046    0.8085    0.2265
Pt    0.2043    0.8503    0.1433
Pt    0.2042    0.8522    0.1898
Pt    0.2058    0.8534    0.2280
Pt    0.2055    0.8900    0.1421
Pt    0.2060    0.8919    0.1855
Pt    0.2070    0.8933    0.2295
Pt    0.2062    0.9337    0.1401
Pt    0.2047    0.9335    0.1830
Pt    0.2034    0.9347    0.2265
Pt    0.2054    0.9771    0.1466
Pt    0.2062    0.9786    0.1846
Pt    0.2078    0.9765    0.2285
Pt    0.2270    0.7917    0.1843
Pt    0.1418    0.8116    0.2070
Pt    0.1405    0.8101    0.1632
Pt    0.2218    0.7874    0.1433
Pt    0.1431    0.7658    0.2041
Pt    0.1413    0.7659    0.1609
Pt    0.1834    0.9573    0.2261
Pt    0.1031    0.9745    0.2045
Pt    0.1001    0.9745    0.1655
Pt    0.1826    0.9559    0.1856
Pt    0.1010    0.9339    0.2045
Pt    0.1011    0.9332    0.1669
Pt    0.1847    0.9529    0.1418
Pt    0.0996    0.8924    0.2066
Pt    0.1008    0.8912    0.1640
Pt    0.1839    0.9155    0.2276
Pt    0.1002    0.8508    0.2059
Pt    0.1020    0.8517    0.1653
Pt    0.0157    0.7878    0.1427
Pt    0.0162    0.7872    0.1843
Pt    0.0178    0.7851    0.2275
Pt    0.0181    0.8316    0.1437
Pt    0.0185    0.8294    0.1843
Pt    0.0127    0.8287    0.2239
Pt    0.0209    0.8713    0.1441
Pt    0.0130    0.8704    0.1839
Pt    0.0148    0.8702    0.2281
Pt    0.0174    0.9132    0.1374
Pt    0.0167    0.9125    0.1844
Pt    0.0174    0.9109    0.2291
Pt    0.0180    0.9549    0.1435
Pt    0.0208    0.9532    0.1834
Pt    0.0148    0.9543    0.2263
Pt    0.0619    0.7909    0.1423
Pt    0.0563    0.7871    0.1843
Pt    0.0596    0.7875    0.2266
Pt    0.0589    0.8286    0.1427
Pt    0.0559    0.8281    0.1866
Pt    0.0563    0.8290    0.2282
Pt    0.0600    0.8706    0.1409
Pt    0.0585    0.8722    0.1865
Pt    0.0607    0.8739    0.2268
Pt    0.0602    0.9142    0.1442
Pt    0.0591    0.9148    0.1850
Pt    0.0608    0.9152    0.2269
Pt    0.0601    0.9559    0.1436
Pt    0.0618    0.9529    0.1831
Pt    0.0582    0.9580    0.2266
Pt    0.0985    0.7870    0.1422
Pt    0.1023    0.7870    0.1855
Pt    0.1020    0.7871    0.2276
Pt    0.0995    0.8296    0.1453
Pt    0.0995    0.8268    0.1893
Pt    0.0984    0.8294    0.2261
Pt    0.0987    0.8721    0.1431
Pt    0.1029    0.8735    0.1866
Pt    0.0986    0.8711    0.2289
Pt    0.0989    0.9108    0.1424
Pt    0.0999    0.9109    0.1847
Pt    0.1011    0.9148    0.2269
Pt    0.1015    0.9543    0.1413
Pt    0.1009    0.9547    0.1855
Pt    0.1023    0.9558    0.2274
Pt    0.1414    0.7882    0.1436
Pt    0.1425    0.7878    0.1846
Pt    0.1437    0.7922    0.2290
Pt    0.1407    0.8322    0.1431
Pt    0.1415    0.8330    0.1868
Pt    0.1424    0.8333    0.2276
Pt    0.1414    0.8707    0.1405
Pt    0.1400    0.8719    0.1846
Pt    0.1435    0.8739    0.2285
Pt    0.1413    0.9158    0.1438
Pt    0.1421    0.9154    0.1857
Pt    0.1403    0.9147    0.2293
Pt    0.1434    0.9533    0.1433
Pt    0.1420    0.9540    0.1862
Pt    0.1416    0.9548    0.2267
Pt    0.1841    0.7906    0.1441
Pt    0.1828    0.7917    0.1867
Pt    0.1814    0.7914    0.2273
Pt    0.1840    0.8327    0.1445
Pt    0.1825    0.8311    0.1849
Pt    0.1807    0.8348    0.2277
Pt    0.1841    0.8705    0.1433
Pt    0.1850    0.8708    0.1858
Pt    0.1867    0.8732    0.2275
Pt    0.1842    0.9123    0.1411
Pt    0.1831    0.9137    0.1830
Pt    0.1851    0.7476    0.1828
Pt    0.1811    0.7508    0.2240
Pt    0.9986    0.9132    0.2056
Pt    0.2036    0.7493    0.1604
Pt    0.9987    0.9544    0.1619
Pt    0.0800    0.7481    0.2057
Pt    0.1641    0.8317    0.1219
Pt    0.9967    0.8925    0.1842
Pt    0.9993    0.9756    0.1832
Pt    0.0784    0.9538    0.1220
Pt    0.9979    0.9356    0.1834
Pt    0.9981    0.8301    0.1255
Pt    0.0377    0.7473    0.2080
Pt    0.1660    0.9954    0.1220
Pt    0.9966    0.9329    0.2279
Pt    0.2235    0.7470    0.1412
Pt    0.2236    0.7494    0.2237
Pt    0.0192    0.9953    0.1867
Pt    0.9981    0.7666    0.1440
Pt    0.1009    0.9960    0.1851
Pt    0.1867    0.9962    0.2282
Pt    0.0005    0.9335    0.1421
Pt    0.2039    0.7478    0.2047
Pt    0.0210    0.8538    0.1235
Pt    0.2051    0.8289    0.1225
Pt    0.1197    0.7468    0.2049
Pt    0.1216    0.9533    0.1231
Pt    0.0794    0.9136    0.1225
Pt    0.0165    0.7664    0.1219
Pt    0.2458    0.8072    0.1387
Pt    0.0610    0.8494    0.1216
Pt    0.0769    0.7476    0.1249
Pt    0.9972    0.8070    0.1864
Pt    0.0590    0.9340    0.1226
Pt    0.1257    0.9954    0.1244
Pt    0.1403    0.7471    0.1839
Pt    0.1004    0.7471    0.1443
Pt    0.2454    0.8345    0.1647
Pt    0.9972    0.7657    0.2280
Pt    0.2458    0.9147    0.1229
Pt    0.0593    0.7687    0.1252
Pt    0.2448    0.7493    0.2051
Pt    0.2461    0.9556    0.2061
Pt    0.1443    0.9962    0.1831
Pt    0.0152    0.8085    0.1256
Pt    0.0167    0.9967    0.1432
Pt    0.2453    0.8303    0.2030
Pt    0.1869    0.8902    0.1218
Pt    0.2241    0.7478    0.1839
Pt    0.2460    0.9344    0.1425
Pt    0.2243    0.7720    0.2447
Pt    0.1821    0.8511    0.1226
Pt    0.9984    0.8902    0.1421
Pt    0.1213    0.9961    0.2067
Pt    0.1452    0.9961    0.1438
Pt    0.2435    0.7506    0.2443
Pt    0.2441    0.8542    0.1853
Pt    0.1019    0.9938    0.2270
Pt    0.2437    0.7477    0.1636
Pt    0.0596    0.9808    0.1217
Pt    0.1013    0.8060    0.1225
Pt    0.2453    0.9570    0.1646
Pt    0.2038    0.9127    0.1232
Pt    0.1630    0.9103    0.1227
Pt    0.2456    0.8942    0.1423
Pt    0.2070    0.7485    0.2455
Pt    0.0149    0.8065    0.2465
Pt    0.2271    0.8533    0.2463
Pt    0.1849    0.9749    0.1247
Pt    0.2462    0.8509    0.2261
Pt    0.2456    0.7719    0.1411
Pt    0.1023    0.9956    0.1428
Pt    0.0576    0.8513    0.2440
Pt    0.1023    0.8477    0.1241
Pt    0.2220    0.8075    0.1222
Pt    0.1832    0.7695    0.2456
Pt    0.0993    0.7669    0.1220
Pt    0.0379    0.8707    0.2451
Pt    0.0400    0.9131    0.2459
Pt    0.0988    0.8096    0.2448
Pt    0.1616    0.7476    0.2455
Pt    0.1196    0.7467    0.1218
Pt    0.1605    0.7903    0.1237
Pt    0.0190    0.9769    0.1230
Pt    0.0800    0.7875    0.2463
Pt    0.1661    0.9965    0.2463
Pt    0.1222    0.7468    0.2464
Pt    0.2266    0.8118    0.2458
Pt    0.0343    0.8274    0.2461
Pt    0.1229    0.8736    0.2464
Pt    0.2036    0.7903    0.2461
Pt    0.0775    0.8303    0.2463
Pt    0.2455    0.8705    0.1216
Pt    0.2064    0.8716    0.1217
Pt    0.1429    0.9753    0.1227
Pt    0.0403    0.8303    0.1235
Pt    0.2244    0.8495    0.1217
Pt    0.0611    0.8937    0.1221
Pt    0.0385    0.9119    0.1217
Pt    0.2463    0.8931    0.1847
Pt    0.2252    0.8943    0.1216
Pt    0.0406    0.8741    0.1218
Pt    0.0568    0.7474    0.3571
Pt    0.2270    0.9784    0.3318
Pt    0.2272    0.9762    0.2906
Pt    0.2061    0.7500    0.2882
Pt    0.0815    0.7476    0.2502
Pt    0.2266    0.9368    0.3336
Pt    0.2298    0.9330    0.2887
Pt    0.9967    0.9740    0.3497
Pt    0.2254    0.8955    0.3312
Pt    0.2280    0.8926    0.2883
Pt    0.2050    0.8299    0.2470
Pt    0.2262    0.8495    0.3303
Pt    0.2230    0.8508    0.2897
Pt    0.9984    0.8302    0.2473
Pt    0.0361    0.7859    0.2875
Pt    0.0372    0.7884    0.3330
Pt    0.0770    0.7480    0.2908
Pt    0.0392    0.8297    0.2936
Pt    0.0360    0.8297    0.3294
Pt    0.9968    0.8708    0.3303
Pt    0.0377    0.8699    0.2900
Pt    0.0376    0.8716    0.3328
Pt    0.9993    0.9094    0.2897
Pt    0.0403    0.9114    0.2907
Pt    0.0383    0.9128    0.3326
Pt    0.1644    0.8723    0.2492
Pt    0.0357    0.9544    0.2925
Pt    0.0384    0.9532    0.3248
Pt    0.1007    0.8927    0.2909
Pt    0.0788    0.7888    0.2881
Pt    0.0783    0.7873    0.3338
Pt    0.1013    0.8467    0.3328
Pt    0.0817    0.8288    0.2886
Pt    0.0789    0.8296    0.3327
Pt    0.1015    0.8511    0.2907
Pt    0.0806    0.8709    0.2891
Pt    0.0840    0.8721    0.3311
Pt    0.1001    0.8109    0.3313
Pt    0.0788    0.9108    0.2899
Pt    0.0794    0.9148    0.3310
Pt    0.1000    0.8079    0.2882
Pt    0.0813    0.9556    0.2894
Pt    0.0800    0.9552    0.3309
Pt    0.0988    0.7646    0.3305
Pt    0.1215    0.7868    0.2914
Pt    0.1188    0.7877    0.3307
Pt    0.0995    0.7665    0.2905
Pt    0.1211    0.8320    0.2907
Pt    0.1214    0.8278    0.3316
Pt    0.0590    0.9754    0.3296
Pt    0.1218    0.8717    0.2919
Pt    0.1219    0.8724    0.3339
Pt    0.0608    0.9763    0.2896
Pt    0.1228    0.9166    0.2933
Pt    0.1233    0.9153    0.3287
Pt    0.0599    0.9347    0.3304
Pt    0.1219    0.9557    0.2889
Pt    0.1218    0.9566    0.3319
Pt    0.0580    0.9338    0.2902
Pt    0.1626    0.7891    0.2878
Pt    0.1622    0.7906    0.3307
Pt    0.0589    0.8928    0.3330
Pt    0.1606    0.8312    0.2916
Pt    0.1637    0.8295    0.3306
Pt    0.0576    0.8898    0.2911
Pt    0.1630    0.8727    0.2886
Pt    0.1656    0.8729    0.3287
Pt    0.0625    0.8549    0.3325
Pt    0.1673    0.9158    0.2907
Pt    0.1634    0.9134    0.3328
Pt    0.0614    0.8486    0.2902
Pt    0.1656    0.9580    0.2922
Pt    0.1626    0.9584    0.3334
Pt    0.0570    0.8094    0.3294
Pt    0.2041    0.7879    0.2900
Pt    0.2019    0.7891    0.3312
Pt    0.0575    0.8087    0.2895
Pt    0.2065    0.8296    0.2882
Pt    0.2062    0.8311    0.3321
Pt    0.0570    0.7660    0.3357
Pt    0.2065    0.8747    0.2876
Pt    0.2042    0.8720    0.3312
Pt    0.0585    0.7674    0.2894
Pt    0.2102    0.9145    0.2901
Pt    0.2063    0.9150    0.3338
Pt    0.0183    0.9748    0.3300
Pt    0.2067    0.9573    0.2932
Pt    0.2045    0.9576    0.3335
Pt    0.2442    0.7910    0.3307
Pt    0.2245    0.8107    0.3323
Pt    0.2278    0.8095    0.2890
Pt    0.0159    0.9764    0.2860
Pt    0.2245    0.7698    0.3291
Pt    0.2276    0.7697    0.2883
Pt    0.0170    0.9312    0.3309
Pt    0.1836    0.9796    0.3326
Pt    0.1874    0.9780    0.2891
Pt    0.0212    0.9332    0.2854
Pt    0.1842    0.9372    0.3329
Pt    0.1866    0.9368    0.2932
Pt    0.0160    0.8898    0.3320
Pt    0.1862    0.8939    0.3327
Pt    0.1867    0.8933    0.2891
Pt    0.2235    0.7492    0.3113
Pt    0.0180    0.8906    0.2876
Pt    0.1846    0.8494    0.3339
Pt    0.0397    0.9564    0.2488
Pt    0.1826    0.8522    0.2887
Pt    0.2019    0.9545    0.2470
Pt    0.1823    0.8095    0.3326
Pt    0.1837    0.8111    0.2889
Pt    0.0182    0.8509    0.3325
Pt    0.1795    0.7687    0.3291
Pt    0.1836    0.7660    0.2858
Pt    0.2463    0.8311    0.2884
Pt    0.1426    0.9794    0.3334
Pt    0.1451    0.9763    0.2891
Pt    0.0144    0.8487    0.2935
Pt    0.1426    0.9374    0.3308
Pt    0.1438    0.9372    0.2911
Pt    0.0179    0.8071    0.3317
Pt    0.1428    0.8932    0.3318
Pt    0.0378    0.7644    0.2684
Pt    0.0385    0.7651    0.3128
Pt    0.0359    0.7678    0.3578
Pt    0.0385    0.8102    0.2695
Pt    0.0358    0.8081    0.3085
Pt    0.0343    0.8048    0.3543
Pt    0.0386    0.8496    0.2669
Pt    0.0391    0.8521    0.3113
Pt    0.0382    0.8521    0.3544
Pt    0.0374    0.8916    0.2680
Pt    0.0356    0.8885    0.3112
Pt    0.0367    0.8921    0.3538
Pt    0.0406    0.9343    0.2668
Pt    0.0357    0.9304    0.3090
Pt    0.0381    0.9349    0.3501
Pt    0.0388    0.9757    0.2694
Pt    0.0379    0.9784    0.3076
Pt    0.0383    0.9757    0.3529
Pt    0.0781    0.7693    0.2703
Pt    0.0775    0.7682    0.3098
Pt    0.0771    0.7631    0.3582
Pt    0.0786    0.8066    0.2679
Pt    0.0792    0.8083    0.3103
Pt    0.0742    0.8073    0.3509
Pt    0.0781    0.8505    0.2692
Pt    0.0824    0.8501    0.3095
Pt    0.0814    0.8514    0.3533
Pt    0.0784    0.8916    0.2710
Pt    0.0826    0.8918    0.3102
Pt    0.0829    0.8924    0.3509
Pt    0.0787    0.9346    0.2697
Pt    0.0795    0.9356    0.3092
Pt    0.0804    0.9353    0.3514
Pt    0.0810    0.9766    0.2692
Pt    0.0821    0.9781    0.3118
Pt    0.0813    0.9796    0.3529
Pt    0.1218    0.7688    0.2689
Pt    0.1203    0.7659    0.3107
Pt    0.1193    0.7668    0.3556
Pt    0.1187    0.8110    0.2680
Pt    0.1219    0.8068    0.3095
Pt    0.1200    0.8089    0.3546
Pt    0.1206    0.8541    0.2687
Pt    0.1222    0.8514    0.3114
Pt    0.1216    0.8513    0.3505
Pt    0.1196    0.8921    0.2676
Pt    0.1237    0.8924    0.3112
Pt    0.1238    0.8940    0.3514
Pt    0.1220    0.9333    0.2711
Pt    0.1234    0.9378    0.3104
Pt    0.1224    0.9345    0.3507
Pt    0.1207    0.9782    0.2708
Pt    0.1224    0.9764    0.3121
Pt    0.1231    0.9786    0.3522
Pt    0.1626    0.7691    0.2677
Pt    0.1620    0.7646    0.3071
Pt    0.1607    0.7682    0.3504
Pt    0.1629    0.8103    0.2700
Pt    0.1654    0.8110    0.3111
Pt    0.1623    0.8086    0.3539
Pt    0.1633    0.8512    0.2694
Pt    0.1633    0.8511    0.3108
Pt    0.1626    0.8503    0.3523
Pt    0.1636    0.8954    0.2714
Pt    0.1657    0.8934    0.3083
Pt    0.1663    0.8901    0.3521
Pt    0.1635    0.9352    0.2699
Pt    0.1635    0.9373    0.3114
Pt    0.1629    0.9341    0.3501
Pt    0.1662    0.9751    0.2692
Pt    0.1637    0.9789    0.3108
Pt    0.1627    0.9805    0.3550
Pt    0.2078    0.7706    0.2670
Pt    0.2050    0.7707    0.3100
Pt    0.2057    0.7674    0.3515
Pt    0.2066    0.8105    0.2706
Pt    0.2026    0.8090    0.3101
Pt    0.2041    0.8105    0.3524
Pt    0.2035    0.8520    0.2685
Pt    0.2045    0.8525    0.3122
Pt    0.2080    0.8538    0.3517
Pt    0.2086    0.8941    0.2678
Pt    0.2055    0.8958    0.3109
Pt    0.2035    0.8922    0.3533
Pt    0.2069    0.9341    0.2723
Pt    0.2077    0.9351    0.3138
Pt    0.2070    0.9374    0.3532
Pt    0.2035    0.9730    0.2671
Pt    0.2049    0.9794    0.3112
Pt    0.2067    0.9766    0.3558
Pt    0.1435    0.8947    0.2932
Pt    0.0161    0.8077    0.2884
Pt    0.1452    0.8490    0.3304
Pt    0.1415    0.8525    0.2882
Pt    0.2455    0.7903    0.2887
Pt    0.1416    0.8086    0.3322
Pt    0.1412    0.8100    0.2888
Pt    0.0186    0.7663    0.3348
Pt    0.1417    0.7665    0.3319
Pt    0.1410    0.7667    0.2888
Pt    0.0180    0.7650    0.2921
Pt    0.1029    0.9767    0.3336
Pt    0.0993    0.9780    0.2878
Pt    0.2281    0.9578    0.3511
Pt    0.0997    0.9345    0.3316
Pt    0.1007    0.9349    0.2896
Pt    0.2235    0.9575    0.3138
Pt    0.1045    0.8940    0.3322
Pt    0.0183    0.7864    0.2669
Pt    0.0176    0.7845    0.3125
Pt    0.0132    0.7864    0.3576
Pt    0.0160    0.8277    0.2686
Pt    0.0151    0.8255    0.3101
Pt    0.0166    0.8250    0.3545
Pt    0.0177    0.8704    0.2670
Pt    0.0144    0.8701    0.3084
Pt    0.0138    0.8684    0.3555
Pt    0.0189    0.9131    0.2652
Pt    0.0174    0.9104    0.3114
Pt    0.0159    0.9105    0.3515
Pt    0.0188    0.9550    0.2670
Pt    0.0165    0.9560    0.3092
Pt    0.0167    0.9528    0.3514
Pt    0.0570    0.7877    0.2687
Pt    0.0579    0.7887    0.3109
Pt    0.0573    0.7863    0.3533
Pt    0.0597    0.8298    0.2677
Pt    0.0602    0.8317    0.3118
Pt    0.0549    0.8278    0.3507
Pt    0.0581    0.8696    0.2689
Pt    0.0585    0.8701    0.3105
Pt    0.0583    0.8718    0.3539
Pt    0.0585    0.9137    0.2691
Pt    0.0593    0.9114    0.3101
Pt    0.0620    0.9113    0.3526
Pt    0.0579    0.9567    0.2728
Pt    0.0608    0.9555    0.3095
Pt    0.0565    0.9564    0.3508
Pt    0.1013    0.7878    0.2691
Pt    0.0992    0.7876    0.3102
Pt    0.0998    0.7886    0.3528
Pt    0.1000    0.8322    0.2700
Pt    0.1011    0.8294    0.3094
Pt    0.0969    0.8278    0.3515
Pt    0.0985    0.8728    0.2654
Pt    0.1027    0.8720    0.3109
Pt    0.1009    0.8707    0.3547
Pt    0.1005    0.9137    0.2704
Pt    0.1006    0.9136    0.3120
Pt    0.1025    0.9160    0.3528
Pt    0.1003    0.9555    0.2686
Pt    0.1034    0.9581    0.3100
Pt    0.1016    0.9567    0.3572
Pt    0.1398    0.7904    0.2701
Pt    0.1447    0.7867    0.3107
Pt    0.1387    0.7876    0.3500
Pt    0.1409    0.8294    0.2695
Pt    0.1393    0.8296    0.3111
Pt    0.1421    0.8299    0.3508
Pt    0.1423    0.8741    0.2708
Pt    0.1433    0.8715    0.3117
Pt    0.1433    0.8704    0.3521
Pt    0.1411    0.9117    0.2712
Pt    0.1437    0.9154    0.3116
Pt    0.1426    0.9148    0.3513
Pt    0.1431    0.9567    0.2678
Pt    0.1449    0.9581    0.3105
Pt    0.1425    0.9564    0.3528
Pt    0.1845    0.7871    0.2689
Pt    0.1826    0.7885    0.3084
Pt    0.1828    0.7878    0.3510
Pt    0.1858    0.8316    0.2704
Pt    0.1861    0.8300    0.3067
Pt    0.1836    0.8300    0.3523
Pt    0.1866    0.8751    0.2681
Pt    0.1858    0.8723    0.3088
Pt    0.1846    0.8691    0.3514
Pt    0.1869    0.9135    0.2696
Pt    0.1839    0.9159    0.3138
Pt    0.1833    0.9150    0.3527
Pt    0.1877    0.9523    0.2715
Pt    0.1853    0.9567    0.3118
Pt    0.1856    0.9549    0.3539
Pt    0.2254    0.7891    0.2676
Pt    0.2245    0.7913    0.3113
Pt    0.2236    0.7901    0.3500
Pt    0.2246    0.8323    0.2675
Pt    0.2248    0.8289    0.3102
Pt    0.2258    0.8324    0.3530
Pt    0.2275    0.8708    0.2675
Pt    0.2242    0.8728    0.3113
Pt    0.2255    0.8749    0.3526
Pt    0.2288    0.9153    0.2688
Pt    0.2294    0.9161    0.3117
Pt    0.2279    0.9149    0.3517
Pt    0.2276    0.9525    0.2697
Pt    0.2075    0.8738    0.2490
Pt    0.1196    0.9155    0.2493
Pt    0.2274    0.9735    0.2500
Pt    0.1828    0.7471    0.3075
Pt    0.1847    0.7492    0.2655
Pt    0.1838    0.7486    0.3510
Pt    0.1394    0.8119    0.2496
Pt    0.1042    0.7488    0.2693
Pt    0.2462    0.8305    0.3293
Pt    0.1832    0.8933    0.2472
Pt    0.0157    0.7656    0.2488
Pt    0.0588    0.8927    0.2480
Pt    0.1832    0.8121    0.2496
Pt    0.1625    0.7923    0.2485
Pt    0.2279    0.9342    0.2469
Pt    0.0178    0.8921    0.2487
Pt    0.1630    0.9557    0.2469
Pt    0.0780    0.9135    0.2495
Pt    0.2452    0.8702    0.2902
Pt    0.9972    0.7673    0.2696
Pt    0.0600    0.7660    0.2475
Pt    0.0797    0.9965    0.2473
Pt    0.2250    0.7502    0.2667
Pt    0.1835    0.9355    0.2501
Pt    0.0786    0.9541    0.3709
Pt    0.0579    0.9343    0.3708
Pt    0.9979    0.7862    0.2922
Pt    0.1421    0.8933    0.2516
Pt    0.2458    0.8738    0.3309
Pt    0.1648    0.9134    0.2514
Pt    0.0575    0.8089    0.2484
Pt    0.2010    0.7490    0.3297
Pt    0.2430    0.8491    0.3093
Pt    0.1426    0.8529    0.2472
Pt    0.0790    0.9575    0.2482
Pt    0.2086    0.9956    0.2495
Pt    0.0376    0.9947    0.3305
Pt    0.0187    0.9769    0.2467
Pt    0.9965    0.9744    0.3086
Pt    0.0758    0.8729    0.2480
Pt    0.0169    0.9740    0.3700
Pt    0.2462    0.9531    0.2919
Pt    0.0172    0.9301    0.3693
Pt    0.1636    0.9563    0.3700
Pt    0.1432    0.9947    0.2684
Pt    0.0181    0.8506    0.2483
Pt    0.1841    0.9759    0.2477
Pt    0.1431    0.7700    0.2471
Pt    0.0182    0.9338    0.2470
Pt    0.2293    0.9922    0.2705
Pt    0.1837    0.8523    0.2501
Pt    0.1231    0.7890    0.2479
Pt    0.0582    0.9814    0.3692
Pt    0.0171    0.9954    0.3081
Pt    0.0987    0.9348    0.2479
Pt    0.0981    0.8510    0.2494
Pt    0.2442    0.7692    0.3111
Pt    0.9997    0.9946    0.3295
Pt    0.1205    0.8339    0.2473
Pt    0.1216    0.9545    0.2479
Pt    0.0606    0.9362    0.2471
Pt    0.1608    0.7889    0.3709
Pt    0.9966    0.9327    0.2667
Pt    0.1414    0.9345    0.2503
Pt    0.9988    0.9345    0.3065
Pt    0.0584    0.9768    0.2501
Pt    0.1400    0.9749    0.2477
Pt    0.1622    0.8323    0.2484
Pt    0.1023    0.7684    0.2477
Pt    0.9984    0.9537    0.2862
Pt    0.1011    0.9760    0.2482
Pt    0.2443    0.7906    0.3716
Pt    0.2239    0.7669    0.3710
Pt    0.1841    0.7688    0.3704
Pt    0.0560    0.8099    0.3714
Pt    0.2095    0.9145    0.3710
Pt    0.1227    0.8743    0.3716
Pt    0.9979    0.9099    0.2474
Pt    0.2281    0.8958    0.2472
Pt    0.0401    0.7865    0.2482
Pt    0.2050    0.9149    0.2487
Pt    0.0993    0.8936    0.2479
Pt    0.0372    0.9966    0.2872
Pt    0.2461    0.7510    0.3716
Pt    0.1833    0.8102    0.3733
Pt    0.1620    0.7485    0.4564
Pt    0.2062    0.9777    0.4337
Pt    0.2256    0.9356    0.4142
Pt    0.2275    0.8950    0.4184
Pt    0.1235    0.9136    0.3720
Pt    0.2310    0.8554    0.4570
Pt    0.2272    0.8510    0.4147
Pt    0.0363    0.7877    0.4112
Pt    0.0557    0.7922    0.4723
Pt    0.0362    0.8305    0.4151
Pt    0.0346    0.8317    0.4539
Pt    0.0379    0.8684    0.4117
Pt    0.0354    0.8702    0.4570
Pt    0.0397    0.9131    0.4138
Pt    0.0380    0.9141    0.4562
Pt    0.1032    0.9784    0.3737
Pt    0.0391    0.9567    0.4116
Pt    0.0393    0.9559    0.4511
Pt    0.1235    0.9556    0.3762
Pt    0.0790    0.7880    0.4152
Pt    0.0788    0.7914    0.4553
Pt    0.0806    0.8299    0.4128
Pt    0.0778    0.8309    0.4569
Pt    0.0798    0.8724    0.4140
Pt    0.0767    0.8712    0.4561
Pt    0.1423    0.8520    0.3727
Pt    0.0786    0.9147    0.4142
Pt    0.0803    0.9180    0.4561
Pt    0.0397    0.9127    0.3728
Pt    0.0810    0.9589    0.4105
Pt    0.0826    0.9570    0.4581
Pt    0.0834    0.9121    0.3733
Pt    0.1190    0.7847    0.4153
Pt    0.1182    0.7894    0.4587
Pt    0.1186    0.8293    0.4139
Pt    0.1215    0.8325    0.4560
Pt    0.1236    0.7473    0.3736
Pt    0.1235    0.8767    0.4151
Pt    0.1208    0.8753    0.4569
Pt    0.0415    0.7692    0.4757
Pt    0.1204    0.9156    0.4159
Pt    0.1237    0.9179    0.4554
Pt    0.1844    0.8934    0.3728
Pt    0.1217    0.9551    0.4118
Pt    0.1233    0.9575    0.4578
Pt    0.1583    0.7865    0.4184
Pt    0.1619    0.7947    0.4581
Pt    0.0127    0.8155    0.4575
Pt    0.1609    0.8300    0.4137
Pt    0.1612    0.8322    0.4556
Pt    0.0157    0.9961    0.4334
Pt    0.1607    0.8713    0.4165
Pt    0.1631    0.8723    0.4605
Pt    0.2248    0.7492    0.3912
Pt    0.1643    0.9154    0.4150
Pt    0.1650    0.9174    0.4591
Pt    0.1627    0.9594    0.4151
Pt    0.1653    0.9607    0.4551
Pt    0.2033    0.7915    0.4161
Pt    0.2035    0.7911    0.4575
Pt    0.2456    0.7478    0.4562
Pt    0.2034    0.8306    0.4175
Pt    0.2071    0.8358    0.4593
Pt    0.9986    0.9583    0.4518
Pt    0.2062    0.8727    0.4144
Pt    0.2060    0.8768    0.4608
Pt    0.2021    0.9181    0.4152
Pt    0.2007    0.9126    0.4581
Pt    0.2056    0.9556    0.4146
Pt    0.1859    0.9795    0.4525
Pt    0.1624    0.9120    0.3740
Pt    0.2238    0.8113    0.4573
Pt    0.1855    0.7475    0.4762
Pt    0.2236    0.8095    0.4154
Pt    0.0997    0.8115    0.3736
Pt    0.1841    0.8512    0.3721
Pt    0.2266    0.7688    0.4571
Pt    0.2262    0.9345    0.3749
Pt    0.2051    0.9556    0.3749
Pt    0.2023    0.7885    0.3739
Pt    0.2251    0.7682    0.4123
Pt    0.0170    0.7602    0.4811
Pt    0.0378    0.8301    0.3724
Pt    0.1833    0.9791    0.4120
Pt    0.1863    0.9371    0.4604
Pt    0.1816    0.9377    0.4140
Pt    0.1793    0.8940    0.4558
Pt    0.1839    0.8960    0.4180
Pt    0.1838    0.7705    0.4139
Pt    0.0300    0.7624    0.3992
Pt    0.0136    0.7735    0.4206
Pt    0.0588    0.7692    0.4536
Pt    0.0372    0.8089    0.3936
Pt    0.0371    0.8072    0.4344
Pt    0.0386    0.8492    0.3931
Pt    0.0337    0.8515    0.4356
Pt    0.0394    0.8926    0.3934
Pt    0.0376    0.8914    0.4356
Pt    0.0382    0.8934    0.4756
Pt    0.0385    0.9312    0.3919
Pt    0.0410    0.9335    0.4360
Pt    0.0377    0.9371    0.4739
Pt    0.0390    0.9779    0.3921
Pt    0.0376    0.9782    0.4325
Pt    0.0373    0.9775    0.4760
Pt    0.0788    0.7644    0.3963
Pt    0.0787    0.7692    0.4359
Pt    0.0799    0.8090    0.3933
Pt    0.0781    0.8117    0.4345
Pt    0.0787    0.8514    0.3946
Pt    0.0791    0.8516    0.4362
Pt    0.0792    0.8525    0.4750
Pt    0.0800    0.8930    0.3948
Pt    0.0788    0.8913    0.4350
Pt    0.0825    0.8952    0.4750
Pt    0.0792    0.9337    0.3917
Pt    0.0810    0.9360    0.4338
Pt    0.0811    0.9378    0.4785
Pt    0.0817    0.9771    0.3907
Pt    0.0817    0.9760    0.4375
Pt    0.0815    0.9785    0.4766
Pt    0.1213    0.7647    0.3952
Pt    0.1185    0.7658    0.4372
Pt    0.1204    0.8072    0.3944
Pt    0.1191    0.8089    0.4368
Pt    0.1185    0.8110    0.4775
Pt    0.1206    0.8540    0.3922
Pt    0.1242    0.8533    0.4338
Pt    0.1209    0.8539    0.4793
Pt    0.1250    0.8939    0.3925
Pt    0.1230    0.8944    0.4367
Pt    0.1219    0.8953    0.4779
Pt    0.1207    0.9345    0.3953
Pt    0.1238    0.9371    0.4338
Pt    0.1231    0.9374    0.4800
Pt    0.1217    0.9779    0.3941
Pt    0.1204    0.9759    0.4353
Pt    0.1626    0.7679    0.3945
Pt    0.1587    0.7689    0.4398
Pt    0.1619    0.7691    0.4769
Pt    0.1636    0.8086    0.3936
Pt    0.1611    0.8119    0.4367
Pt    0.1607    0.8138    0.4810
Pt    0.1655    0.8523    0.3949
Pt    0.1600    0.8505    0.4357
Pt    0.1637    0.8532    0.4798
Pt    0.1661    0.8916    0.3954
Pt    0.1613    0.8966    0.4369
Pt    0.1634    0.8959    0.4798
Pt    0.1621    0.9338    0.3947
Pt    0.1634    0.9376    0.4420
Pt    0.1625    0.9798    0.3941
Pt    0.1637    0.9797    0.4345
Pt    0.2021    0.7687    0.3923
Pt    0.2027    0.7722    0.4357
Pt    0.2058    0.7690    0.4812
Pt    0.2027    0.8092    0.3950
Pt    0.2039    0.8110    0.4366
Pt    0.2059    0.8143    0.4810
Pt    0.2031    0.8518    0.3937
Pt    0.2027    0.8547    0.4390
Pt    0.2065    0.8550    0.4792
Pt    0.2071    0.8959    0.3956
Pt    0.2065    0.8910    0.4351
Pt    0.2039    0.9364    0.3924
Pt    0.2025    0.9371    0.4374
Pt    0.2058    0.9769    0.3955
Pt    0.2042    0.9819    0.4724
Pt    0.1398    0.8083    0.3731
Pt    0.2031    0.7473    0.4145
Pt    0.2234    0.7485    0.4774
Pt    0.1815    0.8529    0.4561
Pt    0.1854    0.8546    0.4173
Pt    0.1421    0.9793    0.4143
Pt    0.1838    0.8126    0.4587
Pt    0.1828    0.8080    0.4143
Pt    0.1194    0.7478    0.4153
Pt    0.1448    0.9422    0.4606
Pt    0.1837    0.7709    0.4583
Pt    0.0115    0.7845    0.3942
Pt    0.0291    0.8002    0.4737
Pt    0.0090    0.8295    0.3975
Pt    0.0138    0.8294    0.4348
Pt    0.0153    0.8713    0.3941
Pt    0.0174    0.8725    0.4356
Pt    0.0187    0.9120    0.3920
Pt    0.0192    0.9163    0.4349
Pt    0.0160    0.9144    0.4746
Pt    0.0159    0.9527    0.3912
Pt    0.0191    0.9557    0.4308
Pt    0.0158    0.9554    0.4762
Pt    0.0575    0.7873    0.3948
Pt    0.0566    0.7895    0.4337
Pt    0.0584    0.8267    0.3935
Pt    0.0564    0.8280    0.4329
Pt    0.0587    0.8728    0.3945
Pt    0.0564    0.8701    0.4364
Pt    0.0565    0.8739    0.4777
Pt    0.0607    0.9117    0.3944
Pt    0.0601    0.9120    0.4363
Pt    0.0609    0.9135    0.4785
Pt    0.0606    0.9578    0.3917
Pt    0.0613    0.9554    0.4340
Pt    0.0587    0.9588    0.4766
Pt    0.0983    0.7876    0.3930
Pt    0.0992    0.7874    0.4369
Pt    0.0997    0.8306    0.3929
Pt    0.0991    0.8315    0.4341
Pt    0.0977    0.8309    0.4767
Pt    0.1022    0.8730    0.3953
Pt    0.1019    0.8721    0.4325
Pt    0.0997    0.8733    0.4757
Pt    0.1017    0.9138    0.3959
Pt    0.1015    0.9144    0.4380
Pt    0.1040    0.9176    0.4780
Pt    0.1009    0.9573    0.3918
Pt    0.1015    0.9535    0.4353
Pt    0.1032    0.9576    0.4794
Pt    0.1427    0.7904    0.3947
Pt    0.1389    0.7885    0.4389
Pt    0.1374    0.7891    0.4801
Pt    0.1387    0.8282    0.3915
Pt    0.1378    0.8294    0.4336
Pt    0.1412    0.8324    0.4778
Pt    0.1421    0.8728    0.3934
Pt    0.1441    0.8750    0.4409
Pt    0.1415    0.8765    0.4802
Pt    0.1434    0.9143    0.3966
Pt    0.1436    0.9181    0.4369
Pt    0.1428    0.9170    0.4774
Pt    0.1439    0.9562    0.3935
Pt    0.1447    0.9591    0.4359
Pt    0.1821    0.7888    0.3932
Pt    0.1832    0.7914    0.4385
Pt    0.1836    0.7910    0.4784
Pt    0.1828    0.8306    0.3957
Pt    0.1815    0.8318    0.4357
Pt    0.1835    0.8350    0.4795
Pt    0.1851    0.8728    0.3954
Pt    0.1815    0.8746    0.4381
Pt    0.1839    0.8746    0.4811
Pt    0.1840    0.9110    0.3939
Pt    0.1816    0.9144    0.4380
Pt    0.1829    0.9581    0.3925
Pt    0.1842    0.9592    0.4348
Pt    0.2234    0.7887    0.3930
Pt    0.2265    0.7915    0.4338
Pt    0.2241    0.7914    0.4793
Pt    0.2228    0.8288    0.3959
Pt    0.2257    0.8333    0.4385
Pt    0.2286    0.8337    0.4767
Pt    0.2243    0.8741    0.3954
Pt    0.2264    0.8723    0.4349
Pt    0.2272    0.9132    0.3944
Pt    0.2205    0.9170    0.4389
Pt    0.2270    0.9566    0.3953
Pt    0.2239    0.9574    0.4382
Pt    0.2052    0.9578    0.4569
Pt    0.0368    0.7856    0.4522
Pt    0.1434    0.9381    0.4170
Pt    0.0173    0.8071    0.4118
Pt    0.0149    0.8511    0.4113
Pt    0.0191    0.8918    0.4134
Pt    0.0151    0.8913    0.4563
Pt    0.0388    0.7674    0.4320
Pt    0.0162    0.9320    0.4109
Pt    0.0173    0.9383    0.4527
Pt    0.1419    0.8971    0.4600
Pt    0.0172    0.9754    0.4081
Pt    0.0176    0.9753    0.4553
Pt    0.1587    0.7477    0.4162
Pt    0.0550    0.7650    0.4118
Pt    0.0577    0.8086    0.4138
Pt    0.0588    0.8105    0.4543
Pt    0.0606    0.8501    0.4145
Pt    0.0556    0.8482    0.4545
Pt    0.0571    0.8920    0.4169
Pt    0.0591    0.8911    0.4572
Pt    0.1423    0.8951    0.4154
Pt    0.0598    0.9357    0.4131
Pt    0.0615    0.9366    0.4551
Pt    0.1419    0.8530    0.4592
Pt    0.0597    0.9761    0.4134
Pt    0.0567    0.9772    0.4537
Pt    0.1401    0.8480    0.4126
Pt    0.0988    0.7668    0.4167
Pt    0.1000    0.8076    0.4153
Pt    0.1001    0.8128    0.4579
Pt    0.1026    0.8518    0.4133
Pt    0.1018    0.8521    0.4559
Pt    0.1388    0.8099    0.4580
Pt    0.1001    0.8969    0.4150
Pt    0.0984    0.8920    0.4541
Pt    0.1425    0.8075    0.4157
Pt    0.1000    0.9348    0.4142
Pt    0.1005    0.9352    0.4572
Pt    0.2029    0.7475    0.3747
Pt    0.1006    0.9772    0.4142
Pt    0.1022    0.9761    0.4568
Pt    0.1831    0.7519    0.4349
Pt    0.1410    0.7664    0.4144
Pt    0.1371    0.7668    0.4571
Pt    0.2453    0.7922    0.4111
Pt    0.0992    0.8475    0.3734
Pt    0.1217    0.9966    0.4138
Pt    0.1843    0.9789    0.3744
Pt    0.1434    0.7669    0.3748
Pt    0.0142    0.7640    0.3766
Pt    0.1207    0.7867    0.3763
Pt    0.1031    0.8934    0.3742
Pt    0.0814    0.8704    0.3728
Pt    0.1445    0.9781    0.3734
Pt    0.0143    0.8916    0.3747
Pt    0.2442    0.7914    0.4558
Pt    0.0599    0.9963    0.4331
Pt    0.2031    0.8730    0.3754
Pt    0.2237    0.7485    0.4339
Pt    0.9964    0.9333    0.4724
Pt    0.2366    0.9756    0.4781
Pt    0.0391    0.9540    0.3732
Pt    0.1441    0.8914    0.3719
Pt    0.1009    0.9326    0.3753
Pt    0.0804    0.9957    0.4566
Pt    0.0771    0.8294    0.3731
Pt    0.1221    0.8316    0.3718
Pt    0.1810    0.9338    0.3736
Pt    0.0603    0.9966    0.3933
Pt    0.0101    0.7866    0.4652
Pt    0.0206    0.7622    0.4533
Pt    0.1186    0.8311    0.4954
Pt    0.9969    0.9341    0.4343
Pt    0.2254    0.9777    0.3754
Pt    0.1824    0.7481    0.3943
Pt    0.1424    0.7489    0.4776
Pt    0.1633    0.8296    0.3739
Pt    0.0139    0.8465    0.3768
Pt    0.0576    0.9357    0.4952
Pt    0.2028    0.7485    0.4551
Pt    0.2268    0.8918    0.3721
Pt    0.0786    0.7853    0.3718
Pt    0.0387    0.8723    0.3755
Pt    0.0596    0.8916    0.3730
Pt    0.1443    0.9359    0.3719
Pt    0.2442    0.7705    0.3913
Pt    0.0128    0.7967    0.4378
Pt    0.2271    0.9825    0.4526
Pt    0.2451    0.8103    0.4339
Pt    0.2444    0.8327    0.3760
Pt    0.2459    0.9568    0.3740
Pt    0.0122    0.8074    0.3769
Pt    0.2460    0.8100    0.4776
Pt    0.1023    0.9967    0.4759
Pt    0.1819    0.7673    0.4963
Pt    0.0373    0.9561    0.4965
Pt    0.0347    0.7859    0.3795
Pt    0.2245    0.8099    0.3732
Pt    0.0368    0.9154    0.4942
Pt    0.1648    0.7479    0.3718
Pt    0.1648    0.8718    0.3742
Pt    0.0583    0.8521    0.3741
Pt    0.2247    0.8551    0.3749
Pt    0.9970    0.9769    0.3884
Pt    0.0515    0.7637    0.3802
Pt    0.2451    0.7703    0.4354
Pt    0.0191    0.7834    0.4965
Pt    0.1617    0.7892    0.4954
Pt    0.0996    0.7643    0.3747
Pt    0.2052    0.8336    0.3739
Pt    0.9965    0.9747    0.4315
Pt    0.2459    0.8302    0.4144
Pt    0.2432    0.7695    0.4782
Pt    0.0164    0.8958    0.4963
Pt    0.0815    0.8734    0.4964
Pt    0.2456    0.8556    0.4798
Pt    0.2464    0.8958    0.3956
Pt    0.0182    0.9764    0.4965
Pt    0.2268    0.8522    0.5818
Pt    0.9980    0.8683    0.6196
Pt    0.9972    0.9340    0.5615
Pt    0.2047    0.7502    0.5818
Pt    0.2454    0.7502    0.5809
Pt    0.0374    0.9139    0.5386
Pt    0.0429    0.9500    0.5410
Pt    0.0441    0.9544    0.5815
Pt    0.0785    0.9109    0.5402
Pt    0.0988    0.9363    0.5344
Pt    0.0784    0.9548    0.5369
Pt    0.1208    0.7873    0.5803
Pt    0.1183    0.8243    0.5770
Pt    0.1205    0.8760    0.5375
Pt    0.1167    0.8682    0.5837
Pt    0.1158    0.9121    0.5416
Pt    0.1609    0.7894    0.5383
Pt    0.1626    0.7899    0.5792
Pt    0.1598    0.8337    0.5389
Pt    0.1601    0.8321    0.5775
Pt    0.1620    0.8743    0.5798
Pt    0.2015    0.7927    0.5378
Pt    0.2019    0.7878    0.5792
Pt    0.2043    0.8363    0.5390
Pt    0.2032    0.8339    0.5769
Pt    0.2036    0.8736    0.5795
Pt    0.1592    0.7468    0.5417
Pt    0.2238    0.7486    0.5175
Pt    0.1197    0.7519    0.5795
Pt    0.0167    0.9349    0.4976
Pt    0.2231    0.8120    0.5803
Pt    0.0980    0.7474    0.5991
Pt    0.2232    0.8129    0.5409
Pt    0.2242    0.7709    0.5795
Pt    0.2245    0.7707    0.5366
Pt    0.1626    0.8893    0.6022
Pt    0.1009    0.8526    0.4971
Pt    0.1228    0.8756    0.5008
Pt    0.0790    0.9575    0.4975
Pt    0.0090    0.7485    0.5081
Pt    0.9988    0.9524    0.5807
Pt    0.1412    0.7681    0.6211
Pt    0.2035    0.8339    0.5013
Pt    0.0378    0.8930    0.5130
Pt    0.0378    0.9342    0.5172
Pt    0.0386    0.9334    0.5635
Pt    0.0395    0.9337    0.6018
Pt    0.0362    0.9738    0.5168
Pt    0.0389    0.9741    0.5602
Pt    0.0404    0.9716    0.6016
Pt    0.0805    0.9955    0.5368
Pt    0.0800    0.8929    0.5176
Pt    0.0777    0.9351    0.5158
Pt    0.0804    0.9776    0.5165
Pt    0.0799    0.9742    0.5559
Pt    0.0792    0.9750    0.6022
Pt    0.1232    0.7684    0.5999
Pt    0.1195    0.8076    0.5992
Pt    0.1213    0.8513    0.5176
Pt    0.1192    0.8454    0.5601
Pt    0.1175    0.8494    0.6034
Pt    0.1201    0.8966    0.5191
Pt    0.1206    0.8938    0.5618
Pt    0.1585    0.7670    0.5218
Pt    0.1627    0.7687    0.5579
Pt    0.1619    0.7670    0.5999
Pt    0.1592    0.8080    0.5172
Pt    0.1614    0.8108    0.5576
Pt    0.1614    0.8096    0.5984
Pt    0.1638    0.8583    0.5223
Pt    0.1616    0.8549    0.5570
Pt    0.1609    0.8498    0.6009
Pt    0.1323    0.8896    0.5840
Pt    0.2016    0.7675    0.5181
Pt    0.2032    0.7697    0.5566
Pt    0.2008    0.7698    0.6015
Pt    0.2027    0.8132    0.5193
Pt    0.2025    0.8125    0.5597
Pt    0.2033    0.8087    0.5987
Pt    0.2044    0.8532    0.5974
Pt    0.2052    0.8917    0.6006
Pt    0.2251    0.8534    0.4992
Pt    0.2236    0.7512    0.5587
Pt    0.9992    0.9963    0.5818
Pt    0.1620    0.7468    0.6206
Pt    0.1442    0.7473    0.5992
Pt    0.0043    0.7725    0.5207
Pt    0.0829    0.9934    0.5785
Pt    0.1211    0.9158    0.5002
Pt    0.1798    0.7478    0.5185
Pt    0.0402    0.9942    0.5793
Pt    0.2244    0.7491    0.6028
Pt    0.0196    0.9124    0.5189
Pt    0.0175    0.9147    0.5601
Pt    0.0211    0.9101    0.6050
Pt    0.0175    0.9545    0.5189
Pt    0.0175    0.9547    0.5623
Pt    0.0176    0.9545    0.6016
Pt    0.0578    0.9138    0.5146
Pt    0.0598    0.9567    0.5145
Pt    0.0616    0.9540    0.5597
Pt    0.0640    0.9527    0.6024
Pt    0.1020    0.7881    0.6022
Pt    0.0984    0.8487    0.5812
Pt    0.0994    0.8710    0.5199
Pt    0.1037    0.8694    0.5580
Pt    0.0989    0.9147    0.5191
Pt    0.1013    0.9568    0.5175
Pt    0.1406    0.7900    0.5989
Pt    0.1401    0.8282    0.5201
Pt    0.1403    0.8297    0.5581
Pt    0.1391    0.8293    0.5962
Pt    0.1434    0.8774    0.5184
Pt    0.1376    0.8714    0.5600
Pt    0.1428    0.8696    0.5987
Pt    0.1808    0.7884    0.5176
Pt    0.1818    0.7899    0.5572
Pt    0.1800    0.7906    0.6006
Pt    0.1822    0.8363    0.5245
Pt    0.1811    0.8323    0.5587
Pt    0.1858    0.8303    0.5998
Pt    0.1814    0.8715    0.5977
Pt    0.1415    0.8906    0.6194
Pt    0.2247    0.7914    0.5206
Pt    0.2220    0.7918    0.5585
Pt    0.2246    0.7920    0.6002
Pt    0.2240    0.8313    0.5183
Pt    0.2249    0.8365    0.5586
Pt    0.2241    0.8312    0.6010
Pt    0.2277    0.8723    0.5994
Pt    0.0205    0.9360    0.5394
Pt    0.0194    0.9325    0.5834
Pt    0.0200    0.9712    0.5395
Pt    0.0197    0.9733    0.5805
Pt    0.0630    0.9319    0.5408
Pt    0.0557    0.9764    0.5359
Pt    0.0614    0.9754    0.5793
Pt    0.0978    0.8279    0.6008
Pt    0.1031    0.8519    0.5373
Pt    0.0996    0.8920    0.5418
Pt    0.1429    0.7723    0.5768
Pt    0.1406    0.8095    0.5766
Pt    0.1398    0.8528    0.5392
Pt    0.1400    0.8506    0.5766
Pt    0.1400    0.8933    0.5419
Pt    0.1812    0.7677    0.5365
Pt    0.1819    0.7671    0.5799
Pt    0.1817    0.8143    0.5378
Pt    0.1818    0.8087    0.5784
Pt    0.1844    0.8513    0.5764
Pt    0.1591    0.9928    0.6191
Pt    0.9984    0.9547    0.5394
Pt    0.0170    0.9932    0.5202
Pt    0.2327    0.9808    0.5188
Pt    0.9989    0.9314    0.5199
Pt    0.0194    0.9923    0.6012
Pt    0.0995    0.9956    0.6015
Pt    0.2045    0.7912    0.4990
Pt    0.2037    0.7490    0.5378
Pt    0.2457    0.8344    0.5396
Pt    0.9970    0.9964    0.5394
Pt    0.0598    0.9948    0.5585
Pt    0.2460    0.7678    0.5181
Pt    0.0358    0.7612    0.5035
Pt    0.2065    0.8740    0.6209
Pt    0.1849    0.7473    0.5577
Pt    0.2449    0.7919    0.5407
Pt    0.0365    0.9967    0.4985
Pt    0.1807    0.8124    0.4999
Pt    0.1822    0.7489    0.6031
Pt    0.2241    0.7718    0.5016
Pt    0.1198    0.8285    0.6186
Pt    0.9971    0.9736    0.5633
Pt    0.1380    0.8130    0.4975
Pt    0.2450    0.7700    0.6002
Pt    0.0563    0.9777    0.4969
Pt    0.1021    0.8939    0.4989
Pt    0.0579    0.9934    0.6016
Pt    0.9973    0.9113    0.5836
Pt    0.0584    0.9315    0.6212
Pt    0.1395    0.8504    0.6190
Pt    0.9981    0.9950    0.4988
Pt    0.2463    0.8346    0.4997
Pt    0.2268    0.8519    0.6197
Pt    0.2459    0.7917    0.4972
Pt    0.9976    0.9334    0.6024
Pt    0.1203    0.9963    0.6202
Pt    0.9976    0.9554    0.5010
Pt    0.2439    0.8565    0.5585
Pt    0.2448    0.8109    0.5991
Pt    0.1413    0.8972    0.4974
Pt    0.1014    0.9768    0.4975
Pt    0.9982    0.8490    0.5989
Pt    0.0799    0.9142    0.4986
Pt    0.2267    0.8132    0.5001
Pt    0.1857    0.8538    0.5009
Pt    0.0941    0.8510    0.6191
Pt    0.1408    0.8525    0.4984
Pt    0.2444    0.7921    0.5798
Pt    0.2433    0.7716    0.5597
Pt    0.1428    0.7662    0.4988
Pt    0.1190    0.8734    0.6136
Pt    0.2449    0.7486    0.4989
Pt    0.0615    0.7658    0.4974
Pt    0.0984    0.8095    0.6204
Pt    0.1635    0.8735    0.4990
Pt    0.1375    0.9939    0.5989
Pt    0.9989    0.9114    0.5395
Pt    0.0994    0.7657    0.6185
Pt    0.2433    0.8537    0.5224
Pt    0.2452    0.8959    0.5970
Pt    0.1638    0.8342    0.5016
Pt    0.2440    0.8787    0.5751
Pt    0.2454    0.8120    0.5593
Pt    0.0377    0.9519    0.6208
Pt    0.1592    0.7885    0.6210
Pt    0.1405    0.8102    0.6194
Pt    0.2437    0.7485    0.5389
Pt    0.9993    0.8924    0.5610
Pt    0.1008    0.9954    0.5183
Pt    0.1615    0.7474    0.5789
Pt    0.2273    0.8933    0.6203
Pt    0.1857    0.8520    0.6212
Pt    0.2238    0.8105    0.6205
Pt    0.1810    0.8113    0.6203
Pt    0.1829    0.8939    0.6207
Pt    0.2456    0.7497    0.6209
Pt    0.9999    0.8300    0.6214
Pt    0.2173    0.9796    0.4967
Pt    0.0613    0.8917    0.4980
Pt    0.1003    0.9367    0.4967
Pt    0.9969    0.8067    0.6796
Pt    1.0000    0.7653    0.7258
Pt    0.9994    0.8931    0.6829
Pt    0.9977    0.8520    0.6454
Pt    0.2049    0.8315    0.6224
Pt    0.0374    0.9941    0.6228
Pt    0.1221    0.7874    0.6221
Pt    0.9999    0.8264    0.7018
Pt    0.0582    0.9726    0.6217
Pt    0.1610    0.8697    0.6234
Pt    0.9973    0.8709    0.6652
Pt    0.9985    0.7668    0.6820
Pt    0.2055    0.7470    0.7075
Pt    0.2262    0.7481    0.6814
Pt    0.0185    0.7473    0.6825
Pt    0.9987    0.9095    0.7051
Pt    0.9971    0.8292    0.7464
Pt    0.2064    0.7491    0.6227
Pt    0.1406    0.7474    0.7292
Pt    0.0402    0.7877    0.6599
Pt    0.0377    0.7863    0.7047
Pt    0.1011    0.9919    0.6417
Pt    0.0392    0.8272    0.6589
Pt    0.0383    0.8274    0.7066
Pt    0.9994    0.8921    0.6463
Pt    0.0382    0.8697    0.6626
Pt    0.0391    0.8706    0.7039
Pt    0.1634    0.8287    0.7450
Pt    0.0408    0.9118    0.6600
Pt    0.0362    0.9104    0.7074
Pt    0.9973    0.7868    0.7020
Pt    0.0177    0.9950    0.7269
Pt    0.0389    0.9539    0.6633
Pt    0.0379    0.9520    0.7064
Pt    0.1210    0.9558    0.7441
Pt    0.0838    0.7882    0.6630
Pt    0.0797    0.7866    0.7034
Pt    0.1609    0.8314    0.6220
Pt    0.0791    0.8277    0.6625
Pt    0.0811    0.8284    0.7015
Pt    0.1017    0.7480    0.6417
Pt    0.0772    0.8702    0.6576
Pt    0.0791    0.8679    0.7021
Pt    0.1040    0.8924    0.7452
Pt    0.0799    0.9117    0.6595
Pt    0.0825    0.9101    0.7022
Pt    0.9970    0.9543    0.7068
Pt    0.0821    0.9536    0.6639
Pt    0.0795    0.9524    0.7029
Pt    0.1421    0.9956    0.6388
Pt    0.2282    0.8101    0.7066
Pt    0.1233    0.7874    0.6637
Pt    0.1218    0.7860    0.7066
Pt    0.0002    0.7666    0.6389
Pt    0.1417    0.7468    0.6414
Pt    0.1196    0.8302    0.6609
Pt    0.1222    0.8278    0.7026
Pt    0.9967    0.8283    0.6619
Pt    0.2450    0.9148    0.6615
Pt    0.1200    0.8672    0.6609
Pt    0.1202    0.8687    0.7021
Pt    0.1845    0.7469    0.7281
Pt    0.1188    0.9100    0.6586
Pt    0.1199    0.9109    0.7040
Pt    0.9974    0.8080    0.6411
Pt    0.1200    0.9518    0.6612
Pt    0.1239    0.9525    0.7026
Pt    0.1199    0.7470    0.7059
Pt    0.0590    0.9929    0.6844
Pt    0.1635    0.7910    0.6616
Pt    0.1646    0.7865    0.7066
Pt    0.0384    0.9094    0.7447
Pt    0.2437    0.9384    0.7213
Pt    0.1666    0.8262    0.6637
Pt    0.1653    0.8302    0.7036
Pt    0.0790    0.9529    0.7461
Pt    0.0177    0.9944    0.6856
Pt    0.1610    0.8721    0.6598
Pt    0.1645    0.8707    0.7055
Pt    0.2041    0.7493    0.6627
Pt    0.1587    0.9099    0.6608
Pt    0.1640    0.9136    0.7025
Pt    0.0374    0.9931    0.7081
Pt    0.1609    0.9533    0.6604
Pt    0.1652    0.9551    0.7036
Pt    0.9981    0.8700    0.7007
Pt    0.1854    0.7678    0.7048
Pt    0.2072    0.7885    0.6657
Pt    0.2076    0.7891    0.7044
Pt    0.9994    0.9113    0.6220
Pt    0.9981    0.8474    0.6821
Pt    0.2086    0.8312    0.6597
Pt    0.2073    0.8317    0.7065
Pt    0.1846    0.7692    0.6644
Pt    0.2042    0.7904    0.6224
Pt    0.2040    0.8734    0.6615
Pt    0.2074    0.8719    0.7053
Pt    0.1217    0.7475    0.6218
Pt    0.2045    0.9139    0.6584
Pt    0.2043    0.9137    0.7050
Pt    0.1216    0.9950    0.6635
Pt    0.2059    0.9558    0.6626
Pt    0.2031    0.9545    0.7054
Pt    0.9975    0.9748    0.6849
Pt    0.2266    0.8112    0.6613
Pt    0.0383    0.9909    0.6611
Pt    0.9972    0.8712    0.7449
Pt    0.2280    0.9788    0.7005
Pt    0.1858    0.8521    0.7078
Pt    0.1850    0.8530    0.6626
Pt    0.0617    0.9285    0.7462
Pt    0.2253    0.9754    0.6576
Pt    0.0151    0.9755    0.6226
Pt    0.2243    0.7479    0.6432
Pt    0.1831    0.7487    0.6417
Pt    0.9973    0.7844    0.6595
Pt    0.2262    0.9956    0.6399
Pt    0.1443    0.9761    0.7052
Pt    0.1659    0.9542    0.7459
Pt    0.2245    0.9337    0.7009
Pt    0.2235    0.9340    0.6622
Pt    0.2270    0.7696    0.6228
Pt    0.1222    0.8719    0.7461
Pt    0.2250    0.8930    0.7051
Pt    0.1637    0.8743    0.7442
Pt    0.1423    0.9961    0.7242
Pt    0.1621    0.7840    0.7461
Pt    0.1410    0.9716    0.6623
Pt    0.1665    0.7484    0.6631
Pt    0.0598    0.9960    0.7234
Pt    0.1426    0.8498    0.6632
Pt    0.1621    0.9943    0.6606
Pt    0.1454    0.9340    0.7019
Pt    0.1395    0.9315    0.6587
Pt    0.1882    0.8109    0.7040
Pt    0.2251    0.9773    0.7427
Pt    0.1002    0.8515    0.7454
Pt    0.1829    0.9778    0.7040
Pt    0.1845    0.9700    0.6548
Pt    0.0165    0.9940    0.6423
Pt    0.1857    0.9366    0.7030
Pt    0.0406    0.7660    0.6417
Pt    0.0378    0.7689    0.6812
Pt    0.0378    0.7629    0.7246
Pt    0.0382    0.8050    0.6842
Pt    0.0405    0.8078    0.7254
Pt    0.0408    0.8518    0.6419
Pt    0.0384    0.8497    0.6862
Pt    0.0408    0.8529    0.7251
Pt    0.0401    0.8878    0.6394
Pt    0.0402    0.8910    0.6844
Pt    0.0370    0.8900    0.7256
Pt    0.0391    0.9349    0.6435
Pt    0.0365    0.9334    0.6833
Pt    0.0402    0.9293    0.7251
Pt    0.0379    0.9718    0.6394
Pt    0.0382    0.9721    0.6840
Pt    0.0367    0.9732    0.7273
Pt    0.0799    0.7677    0.6419
Pt    0.0807    0.7664    0.6819
Pt    0.0799    0.7654    0.7241
Pt    0.0791    0.8015    0.6398
Pt    0.0804    0.8079    0.6835
Pt    0.0798    0.8109    0.7256
Pt    0.0703    0.8552    0.6375
Pt    0.0817    0.8473    0.6799
Pt    0.0809    0.8462    0.7256
Pt    0.0750    0.8903    0.6383
Pt    0.0822    0.8906    0.6799
Pt    0.0820    0.8883    0.7243
Pt    0.0785    0.9354    0.6414
Pt    0.0812    0.9311    0.6813
Pt    0.0792    0.9325    0.7244
Pt    0.0798    0.9735    0.6432
Pt    0.0827    0.9735    0.6837
Pt    0.0805    0.9752    0.7247
Pt    0.1230    0.7673    0.6442
Pt    0.1235    0.7682    0.6845
Pt    0.1181    0.7659    0.7263
Pt    0.1199    0.8078    0.6394
Pt    0.1231    0.8090    0.6834
Pt    0.1250    0.8084    0.7241
Pt    0.1159    0.8509    0.6387
Pt    0.1205    0.8501    0.6826
Pt    0.1232    0.8481    0.7225
Pt    0.1193    0.8920    0.6374
Pt    0.1211    0.8926    0.6812
Pt    0.1225    0.8903    0.7230
Pt    0.1226    0.9308    0.6837
Pt    0.1225    0.9332    0.7242
Pt    0.1206    0.9732    0.6410
Pt    0.1234    0.9743    0.6840
Pt    0.1229    0.9701    0.7230
Pt    0.1614    0.7692    0.6432
Pt    0.1654    0.7660    0.6870
Pt    0.1651    0.7655    0.7276
Pt    0.1622    0.8115    0.6425
Pt    0.1638    0.8074    0.6862
Pt    0.1647    0.8061    0.7236
Pt    0.1645    0.8506    0.6426
Pt    0.1641    0.8501    0.6822
Pt    0.1626    0.8498    0.7266
Pt    0.1623    0.8920    0.6384
Pt    0.1630    0.8915    0.6824
Pt    0.1640    0.8944    0.7251
Pt    0.1629    0.9331    0.6414
Pt    0.1662    0.9295    0.6799
Pt    0.1652    0.9344    0.7247
Pt    0.1596    0.9726    0.6402
Pt    0.1630    0.9768    0.6813
Pt    0.1644    0.9755    0.7251
Pt    0.2060    0.7696    0.6443
Pt    0.2057    0.7682    0.6845
Pt    0.2057    0.7684    0.7261
Pt    0.2028    0.8123    0.6401
Pt    0.2075    0.8128    0.6832
Pt    0.2050    0.8091    0.7265
Pt    0.2061    0.8526    0.6426
Pt    0.2063    0.8545    0.6843
Pt    0.2059    0.8530    0.7264
Pt    0.2042    0.8942    0.6400
Pt    0.2040    0.8907    0.6824
Pt    0.2071    0.8930    0.7290
Pt    0.2032    0.9339    0.6828
Pt    0.2084    0.9343    0.7264
Pt    0.2046    0.9759    0.6835
Pt    0.2061    0.9760    0.7247
Pt    0.2084    0.9562    0.7456
Pt    0.2264    0.7645    0.7055
Pt    0.1861    0.9390    0.6583
Pt    0.0162    0.7468    0.6377
Pt    0.1835    0.8927    0.7036
Pt    0.2056    0.9960    0.7437
Pt    0.1834    0.8937    0.6619
Pt    0.2461    0.9370    0.6405
Pt    0.1872    0.8105    0.6644
Pt    0.1219    0.7878    0.7456
Pt    0.1451    0.8498    0.7026
Pt    0.2251    0.8946    0.6589
Pt    0.2453    0.9800    0.6804
Pt    0.2264    0.8520    0.6602
Pt    0.1851    0.9958    0.6810
Pt    0.1019    0.9752    0.7436
Pt    0.1432    0.8081    0.7031
Pt    0.2295    0.8521    0.7058
Pt    0.0177    0.7880    0.6815
Pt    0.0194    0.7859    0.7272
Pt    0.0197    0.8313    0.6400
Pt    0.0184    0.8244    0.6828
Pt    0.0164    0.8273    0.7243
Pt    0.0179    0.8703    0.6378
Pt    0.0186    0.8711    0.6820
Pt    0.0165    0.8683    0.7223
Pt    0.0173    0.9126    0.6434
Pt    0.0205    0.9102    0.6820
Pt    0.0166    0.9119    0.7270
Pt    0.0153    0.9543    0.6419
Pt    0.0169    0.9550    0.6856
Pt    0.0168    0.9534    0.7249
Pt    0.0604    0.7879    0.6836
Pt    0.0600    0.7871    0.7246
Pt    0.0669    0.8289    0.6380
Pt    0.0565    0.8276    0.6824
Pt    0.0586    0.8291    0.7265
Pt    0.0594    0.8717    0.6839
Pt    0.0618    0.8691    0.7243
Pt    0.0538    0.9101    0.6368
Pt    0.0622    0.9089    0.6815
Pt    0.0615    0.9090    0.7256
Pt    0.0587    0.9537    0.6437
Pt    0.0610    0.9527    0.6829
Pt    0.0587    0.9515    0.7281
Pt    0.1008    0.7831    0.6403
Pt    0.1030    0.7911    0.6830
Pt    0.1003    0.7881    0.7273
Pt    0.0954    0.8300    0.6375
Pt    0.1020    0.8280    0.6816
Pt    0.1037    0.8279    0.7256
Pt    0.0959    0.8740    0.6340
Pt    0.1006    0.8678    0.6797
Pt    0.1014    0.8679    0.7239
Pt    0.1007    0.9158    0.6382
Pt    0.1032    0.9116    0.6811
Pt    0.1033    0.9111    0.7239
Pt    0.0990    0.9549    0.6430
Pt    0.1035    0.9526    0.6842
Pt    0.0989    0.9529    0.7220
Pt    0.1417    0.7905    0.6443
Pt    0.1431    0.7870    0.6844
Pt    0.1422    0.7850    0.7272
Pt    0.1401    0.8334    0.6417
Pt    0.1446    0.8287    0.6845
Pt    0.1437    0.8284    0.7251
Pt    0.1378    0.8704    0.6378
Pt    0.1399    0.8729    0.6844
Pt    0.1422    0.8697    0.7248
Pt    0.1402    0.9123    0.6373
Pt    0.1427    0.9125    0.6842
Pt    0.1414    0.9124    0.7223
Pt    0.1386    0.9519    0.6412
Pt    0.1419    0.9535    0.6814
Pt    0.1459    0.9527    0.7256
Pt    0.1854    0.7899    0.6439
Pt    0.1837    0.7902    0.6847
Pt    0.1849    0.7868    0.7261
Pt    0.1811    0.8311    0.6438
Pt    0.1871    0.8340    0.6860
Pt    0.1850    0.8306    0.7261
Pt    0.1847    0.8731    0.6418
Pt    0.1839    0.8714    0.6838
Pt    0.1851    0.8724    0.7258
Pt    0.1797    0.9141    0.6424
Pt    0.1864    0.9139    0.6828
Pt    0.1851    0.9126    0.7260
Pt    0.1825    0.9576    0.6808
Pt    0.1853    0.9558    0.7245
Pt    0.2246    0.7889    0.6436
Pt    0.2293    0.7871    0.6861
Pt    0.2265    0.7879    0.7267
Pt    0.2291    0.8291    0.6411
Pt    0.2249    0.8326    0.6831
Pt    0.2271    0.8303    0.7260
Pt    0.2261    0.8714    0.6413
Pt    0.2278    0.8723    0.6823
Pt    0.2275    0.8731    0.7252
Pt    0.2238    0.9206    0.6385
Pt    0.2236    0.9113    0.6836
Pt    0.2283    0.9154    0.7271
Pt    0.2263    0.9553    0.6417
Pt    0.2236    0.9556    0.6811
Pt    0.2258    0.9580    0.7209
Pt    0.0190    0.7672    0.6600
Pt    0.0165    0.7656    0.7034
Pt    0.1421    0.8098    0.6633
Pt    0.0174    0.8046    0.6596
Pt    0.0178    0.8049    0.7070
Pt    0.1002    0.8888    0.7018
Pt    0.0196    0.8480    0.6630
Pt    0.0172    0.8480    0.7045
Pt    0.1447    0.7649    0.7070
Pt    0.0210    0.8911    0.6603
Pt    0.0166    0.8884    0.7037
Pt    0.0370    0.8311    0.7460
Pt    0.1465    0.7676    0.6656
Pt    0.0173    0.9338    0.6633
Pt    0.0178    0.9319    0.7053
Pt    0.1009    0.9752    0.7027
Pt    0.2459    0.8934    0.6413
Pt    0.0151    0.9747    0.6610
Pt    0.0169    0.9754    0.7048
Pt    0.1442    0.9344    0.7451
Pt    0.0623    0.7661    0.6608
Pt    0.0583    0.7667    0.7055
Pt    0.2452    0.9771    0.6394
Pt    0.0582    0.8070    0.6611
Pt    0.0601    0.8081    0.7047
Pt    0.1446    0.8094    0.7450
Pt    0.0583    0.8498    0.6641
Pt    0.0577    0.8486    0.7047
Pt    0.1009    0.9738    0.6637
Pt    0.0573    0.8914    0.6611
Pt    0.0605    0.8906    0.7041
Pt    0.0605    0.9961    0.6413
Pt    0.0980    0.8887    0.6569
Pt    0.0612    0.9318    0.6618
Pt    0.0560    0.9294    0.7001
Pt    0.0971    0.7627    0.7462
Pt    0.1382    0.8899    0.6584
Pt    0.0581    0.9754    0.6628
Pt    0.0581    0.9721    0.7072
Pt    0.1007    0.9312    0.7035
Pt    0.2272    0.7674    0.6631
Pt    0.1034    0.7665    0.6654
Pt    0.0996    0.7690    0.7043
Pt    0.1009    0.9315    0.6604
Pt    0.2462    0.8515    0.7283
Pt    0.1022    0.8066    0.6604
Pt    0.1014    0.8075    0.7054
Pt    0.1437    0.8905    0.7048
Pt    0.0944    0.8508    0.6554
Pt    0.0993    0.8485    0.7032
Pt    0.0802    0.9933    0.6637
Pt    0.0157    0.9328    0.6231
Pt    0.9979    0.9319    0.7270
Pt    0.0779    0.7855    0.7452
Pt    0.1409    0.9760    0.7424
Pt    0.2455    0.8941    0.7270
Pt    0.1795    0.9937    0.6401
Pt    0.1437    0.9965    0.6817
Pt    0.1809    0.7703    0.6234
Pt    0.2455    0.8925    0.6825
Pt    0.2009    0.9926    0.6583
Pt    0.0793    0.9923    0.6227
Pt    0.0202    0.9346    0.7433
Pt    0.0832    0.9111    0.7437
Pt    0.0597    0.8903    0.7444
Pt    0.1248    0.9134    0.7449
Pt    0.1230    0.9952    0.7039
Pt    0.2452    0.9557    0.6617
Pt    0.1850    0.9348    0.7440
Pt    0.1427    0.8503    0.7447
Pt    0.0580    0.7648    0.7450
Pt    0.2068    0.9142    0.7449
Pt    0.2457    0.7935    0.6222
Pt    0.1643    0.9151    0.7447
Pt    0.0613    0.9749    0.7418
Pt    0.0171    0.8510    0.7426
Pt    0.2264    0.8103    0.7462
Pt    0.0191    0.8074    0.7451
Pt    0.0796    0.8703    0.7443
Pt    0.0819    0.8284    0.7461
Pt    0.1003    0.9344    0.7435
Pt    0.1863    0.9765    0.7457
Pt    0.9972    0.7884    0.7451
Pt    0.1850    0.8494    0.7453
Pt    0.1442    0.8928    0.7456
Pt    0.0190    0.8907    0.7465
Pt    0.9977    0.8517    0.8066
Pt    0.9964    0.9746    0.8508
Pt    0.0602    0.7469    0.8091
Pt    0.1223    0.7484    0.8293
Pt    0.1012    0.7478    0.8488
Pt    0.9970    0.9745    0.8102
Pt    0.2262    0.9357    0.8705
Pt    0.9966    0.8940    0.8080
Pt    0.9979    0.9540    0.8277
Pt    0.9985    0.9328    0.8087
Pt    0.0380    0.7887    0.7868
Pt    0.0414    0.7891    0.8306
Pt    0.0379    0.8311    0.7883
Pt    0.0406    0.8303    0.8298
Pt    0.0403    0.8709    0.7875
Pt    0.0404    0.8714    0.8328
Pt    0.0401    0.9109    0.7891
Pt    0.0405    0.9117    0.8287
Pt    0.0396    0.9505    0.7852
Pt    0.0381    0.9551    0.8306
Pt    0.0783    0.7858    0.7876
Pt    0.0812    0.7904    0.8301
Pt    0.0831    0.8277    0.7884
Pt    0.0833    0.8297    0.8283
Pt    0.0803    0.8710    0.7876
Pt    0.0824    0.8699    0.8286
Pt    0.0818    0.9100    0.7841
Pt    0.0827    0.9127    0.8281
Pt    0.0801    0.9551    0.7901
Pt    0.0810    0.9548    0.8275
Pt    0.1239    0.7869    0.7871
Pt    0.1243    0.7869    0.8305
Pt    0.1254    0.8293    0.7848
Pt    0.1233    0.8257    0.8294
Pt    0.1220    0.8723    0.7875
Pt    0.1265    0.8685    0.8303
Pt    0.1246    0.9115    0.7877
Pt    0.1240    0.9136    0.8283
Pt    0.1220    0.9535    0.7883
Pt    0.1206    0.9530    0.8271
Pt    0.1638    0.7891    0.7887
Pt    0.1642    0.7881    0.8290
Pt    0.1653    0.8291    0.7868
Pt    0.1677    0.8259    0.8301
Pt    0.1635    0.8723    0.7859
Pt    0.1663    0.8701    0.8295
Pt    0.1646    0.9134    0.7880
Pt    0.1639    0.9126    0.8282
Pt    0.1648    0.9570    0.7873
Pt    0.1633    0.9561    0.8285
Pt    0.2063    0.7871    0.7887
Pt    0.2073    0.7840    0.8297
Pt    0.2060    0.8303    0.7876
Pt    0.2075    0.8262    0.8298
Pt    0.2046    0.8694    0.7874
Pt    0.2059    0.8702    0.8305
Pt    0.2042    0.9167    0.7876
Pt    0.2059    0.9117    0.8291
Pt    0.2053    0.9552    0.7878
Pt    0.2065    0.9565    0.8286
Pt    0.2280    0.9749    0.8285
Pt    0.2257    0.9766    0.7852
Pt    0.2241    0.9367    0.8291
Pt    0.2268    0.9340    0.7896
Pt    0.2271    0.8902    0.8303
Pt    0.2265    0.8956    0.7893
Pt    0.2272    0.8517    0.8300
Pt    0.2296    0.8510    0.7875
Pt    0.2296    0.8077    0.8317
Pt    0.2255    0.8089    0.7894
Pt    0.9973    0.8087    0.8065
Pt    0.0371    0.7857    0.7478
Pt    0.9991    0.8719    0.8288
Pt    0.9976    0.9529    0.7472
Pt    0.0387    0.9543    0.7467
Pt    0.0812    0.9946    0.7855
Pt    0.9975    0.8103    0.8496
Pt    0.0398    0.8702    0.7472
Pt    0.1846    0.8098    0.7473
Pt    0.9981    0.8934    0.8501
Pt    0.9998    0.9553    0.7893
Pt    0.2071    0.9964    0.8268
Pt    0.1021    0.7482    0.8097
Pt    0.2462    0.8922    0.8081
Pt    0.0011    0.9350    0.7671
Pt    0.1380    0.7663    0.7480
Pt    0.2268    0.7669    0.7478
Pt    0.1017    0.8091    0.7468
Pt    0.0369    0.7669    0.7681
Pt    0.0387    0.7659    0.8117
Pt    0.0371    0.7665    0.8510
Pt    0.0382    0.8083    0.7683
Pt    0.0387    0.8089    0.8070
Pt    0.0362    0.8071    0.8502
Pt    0.0372    0.8505    0.7666
Pt    0.0389    0.8510    0.8091
Pt    0.0407    0.8503    0.8506
Pt    0.0402    0.8917    0.7682
Pt    0.0416    0.8916    0.8084
Pt    0.0376    0.8917    0.8510
Pt    0.0409    0.9320    0.7643
Pt    0.0404    0.9334    0.8081
Pt    0.0399    0.9339    0.8502
Pt    0.0398    0.9725    0.7676
Pt    0.0384    0.9733    0.8076
Pt    0.0400    0.9752    0.8514
Pt    0.0780    0.7646    0.7674
Pt    0.0786    0.7657    0.8087
Pt    0.0771    0.7665    0.8509
Pt    0.0815    0.8082    0.7658
Pt    0.0810    0.8074    0.8077
Pt    0.0795    0.8083    0.8511
Pt    0.0795    0.8494    0.7678
Pt    0.0838    0.8499    0.8092
Pt    0.0830    0.8500    0.8485
Pt    0.0784    0.8904    0.7645
Pt    0.0815    0.8903    0.8086
Pt    0.0820    0.8945    0.8497
Pt    0.0823    0.9325    0.7671
Pt    0.0801    0.9308    0.8075
Pt    0.0806    0.9332    0.8497
Pt    0.0810    0.9755    0.7626
Pt    0.0845    0.9757    0.8072
Pt    0.0816    0.9749    0.8477
Pt    0.1178    0.7669    0.7658
Pt    0.1212    0.7671    0.8068
Pt    0.1235    0.7681    0.8531
Pt    0.1228    0.8065    0.7681
Pt    0.1232    0.8087    0.8071
Pt    0.1251    0.8088    0.8525
Pt    0.1212    0.8507    0.7663
Pt    0.1233    0.8484    0.8051
Pt    0.1232    0.8510    0.8531
Pt    0.1243    0.8922    0.7663
Pt    0.1213    0.8905    0.8069
Pt    0.1252    0.8936    0.8503
Pt    0.1247    0.9366    0.7660
Pt    0.1240    0.9327    0.8058
Pt    0.1231    0.9343    0.8495
Pt    0.1251    0.9764    0.7662
Pt    0.1211    0.9763    0.8062
Pt    0.1221    0.9777    0.8509
Pt    0.1654    0.7649    0.7696
Pt    0.1653    0.7672    0.8061
Pt    0.1633    0.7671    0.8505
Pt    0.1640    0.8080    0.7653
Pt    0.1641    0.8079    0.8105
Pt    0.1650    0.8072    0.8508
Pt    0.1643    0.8510    0.7644
Pt    0.1634    0.8518    0.8086
Pt    0.1648    0.8488    0.8507
Pt    0.1629    0.8949    0.7679
Pt    0.1632    0.8936    0.8099
Pt    0.1640    0.8906    0.8497
Pt    0.1633    0.9352    0.7669
Pt    0.1627    0.9343    0.8081
Pt    0.1636    0.9328    0.8513
Pt    0.1648    0.9761    0.7638
Pt    0.1626    0.9761    0.8091
Pt    0.1639    0.9759    0.8510
Pt    0.2061    0.7653    0.7697
Pt    0.2064    0.7651    0.8096
Pt    0.2058    0.7654    0.8519
Pt    0.2051    0.8094    0.7686
Pt    0.2052    0.8075    0.8085
Pt    0.2038    0.8045    0.8529
Pt    0.2050    0.8506    0.7675
Pt    0.2044    0.8510    0.8086
Pt    0.2035    0.8499    0.8509
Pt    0.2089    0.8966    0.7676
Pt    0.2055    0.8935    0.8078
Pt    0.2062    0.8929    0.8535
Pt    0.2050    0.9356    0.7644
Pt    0.2052    0.9352    0.8091
Pt    0.2036    0.9356    0.8498
Pt    0.2079    0.9780    0.7651
Pt    0.2044    0.9772    0.8047
Pt    0.2071    0.9758    0.8496
Pt    0.2313    0.7663    0.8309
Pt    0.2260    0.7659    0.7904
Pt    0.1858    0.9771    0.8296
Pt    0.1855    0.9773    0.7855
Pt    0.1832    0.9341    0.8290
Pt    0.1831    0.9356    0.7877
Pt    0.1870    0.8911    0.8312
Pt    0.1854    0.8936    0.7859
Pt    0.1853    0.8493    0.8283
Pt    0.1834    0.8508    0.7855
Pt    0.1872    0.8066    0.8289
Pt    0.1846    0.8092    0.7884
Pt    0.1846    0.7648    0.8284
Pt    0.1876    0.7670    0.7898
Pt    0.1405    0.9754    0.8288
Pt    0.1465    0.9793    0.7855
Pt    0.1438    0.9355    0.8289
Pt    0.1452    0.9353    0.7870
Pt    0.0171    0.7853    0.7668
Pt    0.0188    0.7885    0.8097
Pt    0.0161    0.7872    0.8505
Pt    0.0184    0.8291    0.7645
Pt    0.0154    0.8300    0.8078
Pt    0.0190    0.8310    0.8509
Pt    0.0153    0.8696    0.7656
Pt    0.0212    0.8717    0.8108
Pt    0.0172    0.8707    0.8507
Pt    0.0183    0.9114    0.7676
Pt    0.0194    0.9124    0.8081
Pt    0.0206    0.9120    0.8506
Pt    0.0188    0.9547    0.7663
Pt    0.0197    0.9565    0.8067
Pt    0.0166    0.9552    0.8484
Pt    0.0577    0.7852    0.7664
Pt    0.0584    0.7876    0.8103
Pt    0.0600    0.7884    0.8495
Pt    0.0564    0.8280    0.7691
Pt    0.0622    0.8292    0.8071
Pt    0.0617    0.8284    0.8474
Pt    0.0604    0.8697    0.7665
Pt    0.0611    0.8697    0.8090
Pt    0.0625    0.8702    0.8502
Pt    0.0604    0.9097    0.7658
Pt    0.0605    0.9113    0.8086
Pt    0.0611    0.9141    0.8487
Pt    0.0607    0.9539    0.7657
Pt    0.0581    0.9562    0.8086
Pt    0.0606    0.9572    0.8496
Pt    0.0987    0.7869    0.7653
Pt    0.1015    0.7874    0.8077
Pt    0.1025    0.7845    0.8509
Pt    0.1020    0.8283    0.7679
Pt    0.1028    0.8282    0.8075
Pt    0.1009    0.8286    0.8497
Pt    0.0988    0.8732    0.7660
Pt    0.1044    0.8689    0.8081
Pt    0.0999    0.8712    0.8504
Pt    0.1029    0.9123    0.7654
Pt    0.1030    0.9131    0.8078
Pt    0.1023    0.9148    0.8493
Pt    0.1035    0.9547    0.7658
Pt    0.1000    0.9551    0.8102
Pt    0.1007    0.9537    0.8485
Pt    0.1435    0.7842    0.7673
Pt    0.1424    0.7869    0.8093
Pt    0.1427    0.7864    0.8539
Pt    0.1439    0.8300    0.7641
Pt    0.1438    0.8287    0.8090
Pt    0.1441    0.8289    0.8518
Pt    0.1419    0.8726    0.7674
Pt    0.1438    0.8722    0.8085
Pt    0.1461    0.8688    0.8511
Pt    0.1442    0.9146    0.7669
Pt    0.1430    0.9122    0.8073
Pt    0.1425    0.9154    0.8491
Pt    0.1444    0.9576    0.7663
Pt    0.1428    0.9560    0.8091
Pt    0.1437    0.9561    0.8496
Pt    0.1842    0.7895    0.7679
Pt    0.1852    0.7866    0.8099
Pt    0.1864    0.7845    0.8484
Pt    0.1849    0.8282    0.7669
Pt    0.1856    0.8283    0.8105
Pt    0.1850    0.8288    0.8512
Pt    0.1841    0.8721    0.7673
Pt    0.1841    0.8738    0.8073
Pt    0.1857    0.8707    0.8493
Pt    0.1865    0.9158    0.7650
Pt    0.1865    0.9138    0.8079
Pt    0.1843    0.9145    0.8514
Pt    0.1879    0.9561    0.7652
Pt    0.1840    0.9568    0.8103
Pt    0.1842    0.9540    0.8487
Pt    0.2256    0.7894    0.7694
Pt    0.2292    0.7881    0.8104
Pt    0.2247    0.7860    0.8527
Pt    0.2281    0.8282    0.7675
Pt    0.2279    0.8305    0.8085
Pt    0.2268    0.8312    0.8524
Pt    0.2252    0.8738    0.7679
Pt    0.2253    0.8728    0.8072
Pt    0.2289    0.8695    0.8501
Pt    0.2298    0.9146    0.7678
Pt    0.2278    0.9150    0.8078
Pt    0.2262    0.9143    0.8483
Pt    0.2277    0.9562    0.7664
Pt    0.2258    0.9559    0.8082
Pt    0.2258    0.9559    0.8494
Pt    0.0187    0.7661    0.7896
Pt    0.0151    0.7671    0.8305
Pt    0.0160    0.8067    0.7862
Pt    0.0161    0.8099    0.8286
Pt    0.0189    0.8505    0.7896
Pt    0.0195    0.8501    0.8300
Pt    0.0168    0.8904    0.7894
Pt    0.0187    0.8916    0.8281
Pt    0.0181    0.9319    0.7888
Pt    0.0194    0.9353    0.8285
Pt    0.0193    0.9753    0.7855
Pt    0.0171    0.9763    0.8301
Pt    0.0563    0.7692    0.7884
Pt    0.0607    0.7686    0.8309
Pt    0.0604    0.8057    0.7876
Pt    0.0606    0.8095    0.8273
Pt    0.0599    0.8505    0.7874
Pt    0.0598    0.8496    0.8295
Pt    0.0597    0.8894    0.7877
Pt    0.0607    0.8901    0.8286
Pt    0.0601    0.9323    0.7861
Pt    0.0586    0.9354    0.8298
Pt    0.0605    0.9742    0.7860
Pt    0.0587    0.9747    0.8279
Pt    0.1002    0.7653    0.7878
Pt    0.0998    0.7646    0.8294
Pt    0.1009    0.8056    0.7861
Pt    0.1027    0.8072    0.8287
Pt    0.1004    0.8500    0.7857
Pt    0.1048    0.8487    0.8289
Pt    0.1015    0.8918    0.7874
Pt    0.1049    0.8886    0.8301
Pt    0.1018    0.9348    0.7868
Pt    0.1027    0.9321    0.8260
Pt    0.1024    0.9760    0.7831
Pt    0.1027    0.9784    0.8293
Pt    0.1428    0.7652    0.7877
Pt    0.1450    0.7669    0.8298
Pt    0.1447    0.8085    0.7868
Pt    0.1440    0.8087    0.8318
Pt    0.1432    0.8490    0.7866
Pt    0.1465    0.8488    0.8304
Pt    0.1460    0.8923    0.7894
Pt    0.1451    0.8946    0.8307
Pt    0.0810    0.9560    0.8706
Pt    0.0375    0.9959    0.8274
Pt    0.9975    0.8500    0.8503
Pt    0.0588    0.9372    0.8705
Pt    0.0186    0.9955    0.8498
Pt    0.2055    0.8276    0.8699
Pt    0.9980    0.8913    0.7685
Pt    0.0181    0.7648    0.7478
Pt    0.2064    0.8706    0.7474
Pt    0.9974    0.9958    0.8327
Pt    0.2442    0.7897    0.7883
Pt    0.9982    0.9128    0.7491
Pt    0.9992    0.9143    0.7856
Pt    0.2244    0.8504    0.7472
Pt    0.0603    0.9943    0.8062
Pt    0.1855    0.7654    0.7491
Pt    0.2068    0.8278    0.7476
Pt    0.2458    0.9546    0.8685
Pt    0.0598    0.8479    0.7475
Pt    0.9994    0.9321    0.8486
Pt    0.0590    0.9932    0.7646
Pt    0.2463    0.7665    0.7678
Pt    0.9973    0.8721    0.8713
Pt    0.1005    0.8520    0.8711
Pt    0.0395    0.9127    0.8698
Pt    0.0186    0.8511    0.8697
Pt    0.0178    0.9924    0.8063
Pt    0.2298    0.8944    0.7503
Pt    0.1026    0.9963    0.7640
Pt    0.1425    0.9337    0.8703
Pt    0.0771    0.9955    0.8284
Pt    0.0994    0.9347    0.8691
Pt    0.9988    0.8314    0.7847
Pt    0.2281    0.8923    0.8688
Pt    0.2075    0.8704    0.8693
Pt    0.0604    0.9950    0.8511
Pt    0.1626    0.9951    0.8288
Pt    0.0189    0.9331    0.8707
Pt    0.2061    0.7870    0.7496
Pt    0.0401    0.8704    0.8712
Pt    0.0371    0.9555    0.8702
Pt    0.2454    0.9765    0.8057
Pt    0.0419    0.9927    0.7850
Pt    0.9978    0.9106    0.8304
Pt    0.2256    0.9761    0.8714
Pt    0.1219    0.9540    0.8687
Pt    0.2455    0.9139    0.8285
Pt    0.9974    0.8697    0.7866
Pt    0.2267    0.8062    0.8691
Pt    0.1858    0.7469    0.8530
Pt    0.0806    0.8301    0.8697
Pt    0.2050    0.9136    0.8710
Pt    0.0804    0.9138    0.8704
Pt    0.1243    0.9133    0.8702
Pt    0.0824    0.7858    0.8713
Pt    0.1637    0.9135    0.8702
Pt    0.1840    0.8089    0.8712
Pt    0.0620    0.8938    0.8695
Pt    0.1003    0.9777    0.8702
Pt    0.1828    0.9743    0.8700
Pt    0.1626    0.9548    0.8701
Pt    0.1018    0.8106    0.8706
Pt    0.0601    0.8072    0.7495
Pt    0.9990    0.9133    0.8711
Pt    0.1419    0.8924    0.8709
Pt    0.1210    0.8728    0.8704
Pt    0.1873    0.8911    0.7487
Pt    0.0167    0.7679    0.8709
Pt    0.1840    0.9364    0.8697
Pt    0.2459    0.9149    0.8690
Pt    0.9981    0.9500    0.8691
Pt    0.1675    0.7868    0.8701
Pt    0.1832    0.8908    0.8702
Pt    0.1036    0.8942    0.8697
Pt    0.0155    0.9745    0.7467
Pt    0.1212    0.8305    0.7470
Pt    0.2279    0.8510    0.8715
Pt    0.2281    0.9386    0.7466
Pt    0.1456    0.7662    0.8735
Pt    1.0000    0.8318    0.9538
Pt    0.2274    0.7669    0.8753
Pt    0.1618    0.8299    0.8733
Pt    0.9980    0.9148    0.9547
Pt    0.0150    0.7471    0.9339
Pt    0.9967    0.8088    0.8892
Pt    0.2456    0.8731    0.9944
Pt    0.0585    0.7468    0.9349
Pt    0.0997    0.8952    0.9113
Pt    0.2282    0.9783    0.9559
Pt    0.2268    0.9767    0.9129
Pt    0.1026    0.8059    0.9560
Pt    0.9965    0.8489    0.8908
Pt    0.2265    0.9353    0.9552
Pt    0.2445    0.8913    0.9342
Pt    0.0387    0.7876    0.9135
Pt    0.0371    0.7859    0.9546
Pt    0.1009    0.7644    0.8722
Pt    0.0371    0.8286    0.9105
Pt    0.0399    0.8304    0.9540
Pt    0.1866    0.9957    0.9343
Pt    0.0394    0.8731    0.9127
Pt    0.0411    0.8727    0.9542
Pt    0.1025    0.8110    0.9118
Pt    0.0383    0.9130    0.9112
Pt    0.0376    0.9154    0.9534
Pt    0.9982    0.8126    0.9744
Pt    0.0387    0.9558    0.9149
Pt    0.0374    0.9524    0.9545
Pt    0.2459    0.9346    0.9743
Pt    0.0806    0.7891    0.9108
Pt    0.0798    0.7846    0.9555
Pt    0.0163    0.7488    0.8934
Pt    0.0813    0.8306    0.9142
Pt    0.0822    0.8302    0.9533
Pt    0.9982    0.9155    0.9133
Pt    0.0786    0.8724    0.9131
Pt    0.0807    0.8707    0.9546
Pt    0.0822    0.8720    0.8723
Pt    0.0794    0.9145    0.9143
Pt    0.0828    0.9156    0.9562
Pt    0.0011    0.9123    0.9951
Pt    0.0792    0.9565    0.9109
Pt    0.0792    0.9558    0.9559
Pt    0.1005    0.7472    0.8917
Pt    0.1228    0.7873    0.9151
Pt    0.1225    0.7852    0.9559
Pt    0.0197    0.9755    0.9553
Pt    0.1206    0.8310    0.9153
Pt    0.1238    0.8284    0.9546
Pt    0.9983    0.9758    0.9762
Pt    0.1218    0.8736    0.9120
Pt    0.1224    0.8737    0.9549
Pt    0.0159    0.9755    0.9130
Pt    0.1209    0.9146    0.9122
Pt    0.1209    0.9167    0.9529
Pt    0.1441    0.7649    0.9133
Pt    0.1223    0.9569    0.9133
Pt    0.1218    0.9549    0.9565
Pt    0.0177    0.9333    0.9515
Pt    0.1647    0.7872    0.9160
Pt    0.1681    0.7859    0.9549
Pt    0.0588    0.8071    0.9957
Pt    0.1637    0.8321    0.9151
Pt    0.1635    0.8310    0.9544
Pt    0.0583    0.7480    0.8955
Pt    0.1627    0.8749    0.9124
Pt    0.1623    0.8729    0.9559
Pt    0.0195    0.9340    0.9115
Pt    0.1667    0.9164    0.9116
Pt    0.1640    0.9146    0.9553
Pt    0.1024    0.8479    0.9530
Pt    0.1629    0.9545    0.9117
Pt    0.1615    0.9562    0.9559
Pt    0.9986    0.9339    0.8924
Pt    0.2080    0.7895    0.9133
Pt    0.2052    0.7858    0.9553
Pt    0.1429    0.7639    0.9538
Pt    0.2059    0.8293    0.9105
Pt    0.2052    0.8287    0.9532
Pt    0.0183    0.8932    0.9522
Pt    0.2053    0.8732    0.9134
Pt    0.2046    0.8729    0.9541
Pt    0.1022    0.8545    0.9141
Pt    0.2038    0.9132    0.9115
Pt    0.2067    0.9134    0.9519
Pt    0.9975    0.9353    0.9731
Pt    0.2054    0.9562    0.9102
Pt    0.2074    0.9563    0.9530
Pt    0.2287    0.9349    0.9127
Pt    0.0170    0.8896    0.9132
Pt    0.2273    0.8957    0.9541
Pt    0.2259    0.8924    0.9110
Pt    0.0807    0.9955    0.8725
Pt    0.2251    0.8482    0.9534
Pt    0.2282    0.8507    0.9140
Pt    0.0602    0.7653    0.8734
Pt    0.2295    0.8091    0.9546
Pt    0.2264    0.8107    0.9131
Pt    0.0592    0.8519    0.9539
Pt    0.2276    0.7673    0.9551
Pt    0.2265    0.7676    0.9144
Pt    0.1032    0.7648    0.9571
Pt    0.1857    0.9760    0.9541
Pt    0.0599    0.8948    0.9554
Pt    0.1003    0.7675    0.9126
Pt    0.0601    0.8483    0.9129
Pt    0.1014    0.9784    0.9153
Pt    0.0594    0.9752    0.9537
Pt    0.0617    0.8072    0.9521
Pt    0.0594    0.8099    0.9126
Pt    0.1011    0.9769    0.9555
Pt    0.0579    0.9777    0.9134
Pt    0.1843    0.9775    0.9128
Pt    0.1024    0.8937    0.9563
Pt    0.1890    0.9336    0.9544
Pt    0.1836    0.9365    0.9144
Pt    0.0590    0.7648    0.9545
Pt    0.1837    0.8946    0.9557
Pt    0.1838    0.8940    0.9112
Pt    0.0164    0.8543    0.9562
Pt    0.1841    0.8482    0.9535
Pt    0.0355    0.7694    0.8919
Pt    0.0361    0.7655    0.9346
Pt    0.0385    0.7649    0.9767
Pt    0.0378    0.8078    0.8919
Pt    0.0388    0.8108    0.9325
Pt    0.0399    0.8065    0.9738
Pt    0.0361    0.8519    0.8924
Pt    0.0386    0.8497    0.9330
Pt    0.0411    0.8479    0.9751
Pt    0.0417    0.8923    0.8924
Pt    0.0391    0.8931    0.9341
Pt    0.0416    0.8914    0.9757
Pt    0.0379    0.9347    0.8911
Pt    0.0401    0.9323    0.9323
Pt    0.0378    0.9340    0.9763
Pt    0.0360    0.9810    0.8916
Pt    0.0363    0.9751    0.9342
Pt    0.0398    0.9751    0.9762
Pt    0.0799    0.7676    0.8929
Pt    0.0829    0.7685    0.9335
Pt    0.0797    0.7646    0.9767
Pt    0.0821    0.8087    0.8917
Pt    0.0821    0.8100    0.9321
Pt    0.0812    0.8081    0.9743
Pt    0.0811    0.8509    0.8925
Pt    0.0819    0.8514    0.9327
Pt    0.0819    0.8501    0.9748
Pt    0.0810    0.8940    0.8900
Pt    0.0805    0.8939    0.9366
Pt    0.0844    0.8937    0.9770
Pt    0.0800    0.9341    0.8917
Pt    0.0792    0.9361    0.9342
Pt    0.0812    0.9357    0.9764
Pt    0.0773    0.9767    0.8931
Pt    0.0795    0.9772    0.9312
Pt    0.0811    0.9772    0.9746
Pt    0.1230    0.7691    0.8943
Pt    0.1228    0.7673    0.9323
Pt    0.1224    0.7641    0.9773
Pt    0.1237    0.8102    0.8923
Pt    0.1223    0.8064    0.9347
Pt    0.1235    0.8045    0.9741
Pt    0.1213    0.8501    0.8941
Pt    0.1245    0.8529    0.9345
Pt    0.1210    0.8493    0.9756
Pt    0.1236    0.8951    0.8919
Pt    0.1220    0.8935    0.9358
Pt    0.1209    0.8948    0.9767
Pt    0.1219    0.9340    0.8908
Pt    0.1202    0.9344    0.9317
Pt    0.1244    0.9363    0.9773
Pt    0.1192    0.9753    0.8902
Pt    0.1203    0.9755    0.9351
Pt    0.1218    0.9757    0.9772
Pt    0.1633    0.7673    0.8939
Pt    0.1675    0.7643    0.9343
Pt    0.1665    0.7645    0.9735
Pt    0.1649    0.8068    0.8918
Pt    0.1641    0.8100    0.9360
Pt    0.1620    0.8051    0.9772
Pt    0.1634    0.8510    0.8950
Pt    0.1630    0.8510    0.9333
Pt    0.1647    0.8509    0.9748
Pt    0.1614    0.8949    0.8920
Pt    0.1648    0.8934    0.9347
Pt    0.1645    0.8979    0.9772
Pt    0.1643    0.9365    0.8905
Pt    0.1637    0.9370    0.9361
Pt    0.1673    0.9351    0.9762
Pt    0.1620    0.9785    0.8906
Pt    0.1617    0.9740    0.9340
Pt    0.1644    0.9762    0.9756
Pt    0.2062    0.7682    0.8934
Pt    0.2064    0.7663    0.9351
Pt    0.2083    0.7673    0.9760
Pt    0.2082    0.8094    0.8919
Pt    0.2036    0.8086    0.9338
Pt    0.2065    0.8112    0.9765
Pt    0.2059    0.8528    0.8936
Pt    0.2045    0.8504    0.9332
Pt    0.2067    0.8534    0.9739
Pt    0.2060    0.8904    0.8921
Pt    0.2071    0.8923    0.9347
Pt    0.2067    0.8927    0.9759
Pt    0.2060    0.9352    0.8910
Pt    0.2061    0.9365    0.9325
Pt    0.2079    0.9340    0.9778
Pt    0.2061    0.9775    0.8924
Pt    0.2088    0.9777    0.9326
Pt    0.2075    0.9761    0.9759
Pt    0.1850    0.8518    0.9141
Pt    0.0579    0.7673    0.9151
Pt    0.1851    0.8088    0.9563
Pt    0.1844    0.8089    0.9136
Pt    0.0575    0.9353    0.9535
Pt    0.1870    0.7613    0.9560
Pt    0.1880    0.7658    0.9156
Pt    0.0599    0.9352    0.9110
Pt    0.1429    0.9780    0.9530
Pt    0.1437    0.9757    0.9123
Pt    0.0587    0.8958    0.9142
Pt    0.1428    0.9342    0.9535
Pt    0.1448    0.9341    0.9155
Pt    0.0999    0.9372    0.9532
Pt    0.1419    0.8942    0.9569
Pt    0.1415    0.8942    0.9144
Pt    0.1411    0.8546    0.9129
Pt    0.1444    0.8527    0.9550
Pt    0.0156    0.7890    0.8956
Pt    0.0187    0.7877    0.9343
Pt    0.0187    0.7877    0.9767
Pt    0.0157    0.8291    0.8918
Pt    0.0191    0.8315    0.9328
Pt    0.0209    0.8311    0.9737
Pt    0.0151    0.8709    0.8917
Pt    0.0181    0.8687    0.9342
Pt    0.0183    0.8749    0.9755
Pt    0.0185    0.9128    0.8906
Pt    0.0188    0.9135    0.9315
Pt    0.0180    0.9132    0.9748
Pt    0.0184    0.9547    0.8944
Pt    0.0172    0.9558    0.9349
Pt    0.0160    0.9544    0.9740
Pt    0.0571    0.7879    0.8914
Pt    0.0599    0.7902    0.9325
Pt    0.0612    0.7854    0.9746
Pt    0.0594    0.8290    0.8908
Pt    0.0596    0.8287    0.9339
Pt    0.0610    0.8271    0.9741
Pt    0.0611    0.8707    0.8921
Pt    0.0614    0.8718    0.9340
Pt    0.0614    0.8709    0.9764
Pt    0.0605    0.9156    0.8911
Pt    0.0606    0.9141    0.9345
Pt    0.0612    0.9121    0.9751
Pt    0.0589    0.9550    0.8926
Pt    0.0610    0.9551    0.9328
Pt    0.0593    0.9544    0.9754
Pt    0.1024    0.7873    0.8930
Pt    0.1004    0.7868    0.9323
Pt    0.1017    0.7869    0.9758
Pt    0.1013    0.8300    0.8911
Pt    0.1020    0.8271    0.9369
Pt    0.1023    0.8283    0.9734
Pt    0.1040    0.8744    0.8897
Pt    0.1005    0.8725    0.9346
Pt    0.1014    0.8693    0.9761
Pt    0.1035    0.9157    0.8916
Pt    0.1010    0.9137    0.9336
Pt    0.1043    0.9158    0.9760
Pt    0.1021    0.9556    0.8918
Pt    0.1016    0.9562    0.9333
Pt    0.1012    0.9558    0.9762
Pt    0.1447    0.7879    0.8927
Pt    0.1479    0.7840    0.9349
Pt    0.1433    0.7840    0.9742
Pt    0.1432    0.8298    0.8968
Pt    0.1429    0.8305    0.9349
Pt    0.1437    0.8271    0.9752
Pt    0.1433    0.8727    0.8917
Pt    0.1425    0.8736    0.9348
Pt    0.1445    0.8736    0.9778
Pt    0.1432    0.9149    0.8938
Pt    0.1440    0.9111    0.9336
Pt    0.1444    0.9144    0.9764
Pt    0.1410    0.9549    0.8925
Pt    0.1403    0.9550    0.9336
Pt    0.1435    0.9588    0.9751
Pt    0.1846    0.7883    0.8931
Pt    0.1866    0.7877    0.9346
Pt    0.1870    0.7881    0.9741
Pt    0.1847    0.8306    0.8912
Pt    0.1841    0.8293    0.9327
Pt    0.1843    0.8279    0.9750
Pt    0.1849    0.8734    0.8947
Pt    0.1839    0.8724    0.9323
Pt    0.1828    0.8710    0.9728
Pt    0.1851    0.9164    0.8903
Pt    0.1836    0.9144    0.9347
Pt    0.1887    0.9145    0.9781
Pt    0.1832    0.9564    0.8913
Pt    0.1858    0.9559    0.9343
Pt    0.1859    0.9540    0.9714
Pt    0.2293    0.7869    0.8936
Pt    0.2267    0.7891    0.9364
Pt    0.2265    0.7897    0.9781
Pt    0.2264    0.8293    0.8921
Pt    0.2254    0.8300    0.9357
Pt    0.2259    0.8316    0.9760
Pt    0.2277    0.8706    0.8932
Pt    0.2244    0.8716    0.9345
Pt    0.2276    0.8721    0.9732
Pt    0.2268    0.9119    0.8909
Pt    0.2264    0.9133    0.9306
Pt    0.2271    0.9139    0.9773
Pt    0.2264    0.9560    0.8919
Pt    0.2258    0.9555    0.9351
Pt    0.2274    0.9567    0.9748
Pt    0.0987    0.9361    0.9120
Pt    0.0170    0.7676    0.9136
Pt    0.0145    0.7691    0.9555
Pt    0.1440    0.8065    0.9560
Pt    0.0162    0.8105    0.9150
Pt    0.0184    0.8101    0.9531
Pt    0.1417    0.8076    0.9159
Pt    0.0169    0.8515    0.9129
Pt    0.2281    0.7470    0.9734
Pt    0.9996    0.8931    0.8911
Pt    0.1420    0.9765    0.8718
Pt    0.2054    0.7875    0.8730
Pt    0.1436    0.8497    0.8747
Pt    0.1653    0.7860    0.9956
Pt    0.2459    0.7659    0.9331
Pt    0.9990    0.9942    0.9544
Pt    0.1210    0.7890    0.8718
Pt    0.9984    0.9515    0.9141
Pt    0.1850    0.9961    0.9739
Pt    0.9968    0.9771    0.9325
Pt    0.2048    0.9575    0.8733
Pt    0.0378    0.7476    0.9138
Pt    0.0184    0.8094    0.8720
Pt    0.9965    0.7682    0.9766
Pt    0.1866    0.9415    0.9960
Pt    0.1251    0.9961    0.9110
Pt    0.0582    0.9761    0.8728
Pt    0.0586    0.9963    0.9340
Pt    0.9977    0.8522    0.9768
Pt    0.0178    0.9950    0.9768
Pt    0.2449    0.9788    0.8919
Pt    0.1859    0.8527    0.9949
Pt    0.0208    0.8526    0.9953
Pt    0.0807    0.7470    0.9515
Pt    0.1433    0.8094    0.8744
Pt    0.9978    0.8917    0.9349
Pt    0.2040    0.8311    0.9948
Pt    0.1867    0.9744    0.9930
Pt    0.0374    0.7868    0.9953
Pt    0.0382    0.7881    0.8717
Pt    0.1844    0.7647    0.8739
Pt    0.0373    0.9960    0.9536
Pt    0.1016    0.7670    0.9966
Pt    0.1243    0.8716    0.9939
Pt    0.0619    0.8482    0.9960
Pt    0.1849    0.8496    0.8727
Pt    0.1858    0.8915    0.9953
Pt    0.1640    0.8710    0.8744
Pt    0.0177    0.8101    0.9960
Pt    0.0787    0.9565    0.9959
Pt    0.9982    0.8313    0.9964
Pt    0.2279    0.7668    0.9964
Pt    0.2047    0.7880    0.9962
Pt    0.0175    0.9344    0.9941
Pt    0.9975    0.7891    0.9154
Pt    0.1834    0.8060    0.9960
Pt    0.0405    0.8295    0.9956
Pt    0.1446    0.9353    0.9950
Pt    0.1431    0.8501    0.9960
Pt    0.0372    0.9544    0.9961
Pt    0.1013    0.8087    0.9959
Pt    0.1653    0.8311    0.9961
Pt    0.1456    0.7673    0.9962
Pt    0.0989    0.9758    0.9960
Pt    0.1451    0.9761    0.9964
Pt    0.2258    0.8936    0.9961
Pt    0.1234    0.8295    0.9961
Pt    0.2065    0.9964    0.9960
Pt    0.1024    0.9350    0.9955
Pt    0.0161    0.9726    0.9964
Pt    0.0841    0.7868    0.9962
Pt    0.1865    0.7672    0.9964
Pt    0.1414    0.8096    0.9961
Pt    0.0375    0.9118    0.9953
Pt    0.0822    0.8273    0.9949
Pt    0.0154    0.7674    0.9962
Pt    0.0600    0.8496    0.8722
Pt    0.0176    0.9773    0.8721
Pt    0.0223    0.8912    0.8732
Pt    0.0394    0.8279    0.8731
Pt    0.0603    0.8087    0.8716
Pt    0.1221    0.8296    0.8724
Pt    0.2464    0.8495    0.9761
Pt    0.1389    0.9966    0.9347
Pt    0.1018    0.9966    0.9361
Pt    0.1018    0.8503    0.9966
Pt    0.4733    0.9984    0.0587
Pt    0.3514    0.9994    0.0590
Pt    0.4102    0.1203    0.9995
Pt    0.4548    0.9987    0.0382
Pt    0.2710    0.2276    0.9975
Pt    0.2891    0.0386    0.0423
Pt    0.2884    0.0400    0.0836
Pt    0.2488    0.0795    0.0389
Pt    0.3524    0.0005    0.1047
Pt    0.2900    0.0792    0.0402
Pt    0.2918    0.0819    0.0815
Pt    0.3107    0.2269    0.9985
Pt    0.2499    0.1218    0.9977
Pt    0.2878    0.1205    0.0386
Pt    0.2886    0.1252    0.0840
Pt    0.4668    0.0090    0.1002
Pt    0.3333    0.1198    0.9981
Pt    0.2909    0.1653    0.0410
Pt    0.2917    0.1646    0.0816
Pt    0.3970    0.0594    0.0418
Pt    0.2882    0.1237    0.9993
Pt    0.2912    0.2049    0.0377
Pt    0.2909    0.2055    0.0791
Pt    0.3912    0.1003    0.9992
Pt    0.2470    0.1819    0.0599
Pt    0.4328    0.0184    0.0414
Pt    0.4131    0.9990    0.0404
Pt    0.3309    0.9973    0.9996
Pt    0.3100    0.0578    0.9968
Pt    0.2477    0.1635    0.0365
Pt    0.4138    0.9985    0.0794
Pt    0.2487    0.0384    0.1213
Pt    0.2491    0.2056    0.0407
Pt    0.3308    0.0412    0.0428
Pt    0.3347    0.0391    0.0826
Pt    0.2504    0.2283    0.0171
Pt    0.4317    0.0002    0.1030
Pt    0.3332    0.0791    0.0405
Pt    0.3333    0.0837    0.0786
Pt    0.3897    0.0206    0.0824
Pt    0.2496    0.0165    0.0585
Pt    0.3316    0.1214    0.0400
Pt    0.3338    0.1209    0.0785
Pt    0.2483    0.0189    0.0191
Pt    0.3086    0.9969    0.0590
Pt    0.3342    0.1641    0.0377
Pt    0.3346    0.1651    0.0791
Pt    0.2507    0.2088    0.0800
Pt    0.4542    0.0394    0.9997
Pt    0.3334    0.2077    0.0399
Pt    0.3383    0.2033    0.0761
Pt    0.3950    0.2461    0.0985
Pt    0.3278    0.0392    0.9976
Pt    0.2472    0.1628    0.0803
Pt    0.3113    0.2247    0.0780
Pt    0.4141    0.0402    0.9972
Pt    0.3103    0.9984    0.1042
Pt    0.2480    0.1229    0.0813
Pt    0.2685    0.1848    0.0404
Pt    0.3582    0.0245    0.1191
Pt    0.3132    0.2269    0.0376
Pt    0.3749    0.0384    0.0403
Pt    0.4336    0.0184    0.9980
Pt    0.4940    0.0623    0.1007
Pt    0.3525    0.1446    0.0352
Pt    0.2477    0.0835    0.0807
Pt    0.2707    0.1015    0.9986
Pt    0.2894    0.9968    0.0812
Pt    0.2502    0.2269    0.0596
Pt    0.4333    0.1063    0.0002
Pt    0.2911    0.2466    0.1202
Pt    0.3117    0.1867    0.1200
Pt    0.3716    0.1203    0.9996
Pt    0.2886    0.0790    0.9979
Pt    0.3680    0.0012    0.0804
Pt    0.4171    0.0421    0.0390
Pt    0.2471    0.0401    0.0822
Pt    0.3925    0.1418    0.9997
Pt    0.4351    0.9982    0.0195
Pt    0.3935    0.9979    0.0188
Pt    0.3529    0.9987    0.0213
Pt    0.3717    0.1429    0.1001
Pt    0.3503    0.1002    0.1197
Pt    0.4151    0.9980    0.9988
Pt    0.2659    0.9970    0.1011
Pt    0.4535    0.0007    0.0776
Pt    0.4518    0.0402    0.0399
Pt    0.4553    0.0404    0.0811
Pt    0.4952    0.0605    0.0165
Pt    0.4547    0.0836    0.0401
Pt    0.4517    0.0850    0.0738
Pt    0.3709    0.9986    0.9995
Pt    0.4496    0.1231    0.0790
Pt    0.3120    0.1848    0.9985
Pt    0.3093    0.1010    0.0379
Pt    0.2688    0.2459    0.1009
Pt    0.3560    0.0975    0.0851
Pt    0.3938    0.9973    0.0618
Pt    0.3076    0.9993    0.0186
Pt    0.3109    0.0622    0.0829
Pt    0.3539    0.1431    0.0828
Pt    0.3348    0.2042    0.9977
Pt    0.3103    0.0608    0.0401
Pt    0.3524    0.1397    0.1205
Pt    0.2685    0.1447    0.0827
Pt    0.3579    0.2452    0.0551
Pt    0.3278    0.1615    0.9992
Pt    0.2903    0.2454    0.0802
Pt    0.3521    0.2462    0.0992
Pt    0.3526    0.1478    0.0025
Pt    0.3926    0.0181    0.0394
Pt    0.4535    0.9990    0.9979
Pt    0.2886    0.0174    0.0169
Pt    0.2922    0.0182    0.0611
Pt    0.2880    0.0177    0.1013
Pt    0.2876    0.0583    0.0210
Pt    0.2881    0.0603    0.0613
Pt    0.2899    0.0586    0.1030
Pt    0.2889    0.1004    0.0183
Pt    0.2914    0.1032    0.0592
Pt    0.2924    0.0993    0.1031
Pt    0.2916    0.1424    0.0199
Pt    0.2907    0.1420    0.0609
Pt    0.2909    0.1449    0.1040
Pt    0.2913    0.1863    0.0161
Pt    0.2919    0.1849    0.0595
Pt    0.2910    0.1867    0.0988
Pt    0.2909    0.2254    0.0180
Pt    0.2909    0.2268    0.0569
Pt    0.2932    0.2251    0.1001
Pt    0.3289    0.0199    0.0190
Pt    0.3309    0.0200    0.0647
Pt    0.3373    0.0218    0.1019
Pt    0.3289    0.0603    0.0183
Pt    0.3304    0.0618    0.0638
Pt    0.3344    0.0625    0.0976
Pt    0.3313    0.1007    0.0209
Pt    0.3324    0.1017    0.0583
Pt    0.3292    0.1020    0.1001
Pt    0.3296    0.1404    0.0179
Pt    0.3328    0.1424    0.0618
Pt    0.3331    0.1435    0.0989
Pt    0.3343    0.1864    0.0190
Pt    0.3385    0.1861    0.0560
Pt    0.3351    0.1863    0.0989
Pt    0.3337    0.2256    0.0185
Pt    0.3347    0.2275    0.0586
Pt    0.3333    0.2241    0.0970
Pt    0.3744    0.0190    0.0177
Pt    0.3691    0.0218    0.0612
Pt    0.3736    0.0594    0.0196
Pt    0.3752    0.0599    0.0615
Pt    0.3759    0.1853    0.0998
Pt    0.3796    0.2226    0.0997
Pt    0.4145    0.0191    0.0191
Pt    0.4120    0.0209    0.0603
Pt    0.4148    0.0619    0.0176
Pt    0.2494    0.1871    0.0181
Pt    0.4540    0.0189    0.0202
Pt    0.4546    0.0217    0.0605
Pt    0.4526    0.0604    0.0198
Pt    0.4524    0.0610    0.0585
Pt    0.4531    0.1006    0.0954
Pt    0.4543    0.1430    0.1021
Pt    0.4741    0.0604    0.0787
Pt    0.4132    0.0846    0.9981
Pt    0.4749    0.1021    0.0741
Pt    0.2925    0.2069    0.1195
Pt    0.2473    0.0598    0.0175
Pt    0.2674    0.0171    0.9977
Pt    0.4764    0.1019    0.0330
Pt    0.2491    0.1446    0.0157
Pt    0.3569    0.0999    0.0378
Pt    0.4960    0.1041    0.0540
Pt    0.4329    0.0176    0.0792
Pt    0.4184    0.2444    0.1134
Pt    0.2683    0.1446    0.0392
Pt    0.3086    0.0179    0.0389
Pt    0.2677    0.0390    0.0209
Pt    0.2684    0.0389    0.0601
Pt    0.2678    0.0365    0.1015
Pt    0.2685    0.0784    0.0205
Pt    0.2680    0.0822    0.0631
Pt    0.2695    0.0790    0.1044
Pt    0.2671    0.1259    0.0193
Pt    0.2694    0.1190    0.0609
Pt    0.2709    0.1262    0.1040
Pt    0.2712    0.1651    0.0186
Pt    0.2706    0.1635    0.0621
Pt    0.2688    0.1635    0.1014
Pt    0.2689    0.2063    0.0201
Pt    0.2717    0.2032    0.0598
Pt    0.2713    0.2070    0.1007
Pt    0.3282    1.0000    0.0807
Pt    0.3563    0.1841    0.0806
Pt    0.3117    0.1033    0.0809
Pt    0.3613    0.0289    0.0893
Pt    0.3331    0.2464    0.1198
Pt    0.2681    0.1031    0.0863
Pt    0.3076    0.0410    0.0210
Pt    0.3089    0.0396    0.0640
Pt    0.3146    0.0401    0.1011
Pt    0.3079    0.0799    0.0199
Pt    0.3119    0.0828    0.0586
Pt    0.3128    0.0809    0.1032
Pt    0.3110    0.1204    0.0143
Pt    0.3111    0.1224    0.0605
Pt    0.3113    0.1238    0.1006
Pt    0.3111    0.1623    0.0210
Pt    0.3147    0.1644    0.0584
Pt    0.3158    0.1638    0.0998
Pt    0.3110    0.2058    0.0189
Pt    0.3122    0.2066    0.0575
Pt    0.3152    0.2059    0.0989
Pt    0.3938    0.1647    0.0995
Pt    0.2490    0.2262    0.1014
Pt    0.3542    0.2278    0.0783
Pt    0.2702    0.1003    0.0381
Pt    0.4752    0.0193    0.0393
Pt    0.3142    0.1877    0.0784
Pt    0.3523    0.0394    0.0191
Pt    0.3502    0.0398    0.0595
Pt    0.3581    0.0518    0.1156
Pt    0.3506    0.0799    0.0206
Pt    0.3556    0.0768    0.0600
Pt    0.3620    0.0801    0.1068
Pt    0.3521    0.1245    0.0185
Pt    0.3535    0.1195    0.1008
Pt    0.3557    0.1688    0.0225
Pt    0.3545    0.1619    0.0605
Pt    0.3552    0.1637    0.1011
Pt    0.3574    0.2078    0.0957
Pt    0.3126    0.1853    0.0394
Pt    0.3726    0.9976    0.0414
Pt    0.4736    0.9994    0.0187
Pt    0.3113    0.1435    0.0801
Pt    0.3101    0.1416    0.0388
Pt    0.3602    0.0591    0.0856
Pt    0.3940    0.0412    0.0172
Pt    0.3918    0.0375    0.0613
Pt    0.3904    0.0787    0.0211
Pt    0.3982    0.2065    0.1025
Pt    0.3074    0.0192    0.0830
Pt    0.2658    0.1854    0.0816
Pt    0.3553    0.0592    0.0380
Pt    0.2494    0.1448    0.0590
Pt    0.4348    0.0388    0.0192
Pt    0.4320    0.0417    0.0632
Pt    0.4358    0.0843    0.0184
Pt    0.4325    0.1209    0.0994
Pt    0.4164    0.1444    0.1028
Pt    0.4735    0.1024    0.1164
Pt    0.3713    0.0785    0.9991
Pt    0.4771    0.0191    0.0783
Pt    0.4751    0.0385    0.0182
Pt    0.4746    0.0399    0.0586
Pt    0.4773    0.0390    0.1005
Pt    0.4736    0.0799    0.0188
Pt    0.4764    0.0813    0.0580
Pt    0.4728    0.0816    0.0955
Pt    0.4715    0.1221    0.0965
Pt    0.3559    0.2286    0.0354
Pt    0.3477    0.0169    0.0395
Pt    0.2686    0.0178    0.0379
Pt    0.2684    0.0173    0.0785
Pt    0.4739    0.0629    0.0377
Pt    0.4313    0.0666    0.0401
Pt    0.2678    0.0589    0.0426
Pt    0.2686    0.0607    0.0823
Pt    0.2717    0.2256    0.0780
Pt    0.2693    0.2285    0.0382
Pt    0.2911    0.1629    0.0017
Pt    0.2480    0.0831    0.9978
Pt    0.2694    0.1844    0.9984
Pt    0.3131    0.1435    0.1208
Pt    0.4855    0.2348    0.0120
Pt    0.2672    0.1858    0.1215
Pt    0.3106    0.2264    0.1205
Pt    0.3925    0.1413    0.1195
Pt    0.4736    0.1414    0.1193
Pt    0.2491    0.1220    0.0388
Pt    0.2476    0.1008    0.0197
Pt    0.2481    0.0389    0.0406
Pt    0.3904    0.0002    0.1005
Pt    0.4954    0.0812    0.0778
Pt    0.4943    0.0404    0.0810
Pt    0.4564    0.0807    0.1173
Pt    0.3753    0.1675    0.0030
Pt    0.3570    0.2263    0.1176
Pt    0.3314    0.0802    0.0001
Pt    0.3969    0.2276    0.1215
Pt    0.4943    0.1018    0.0995
Pt    0.2473    0.0182    0.0995
Pt    0.4926    0.1609    0.1156
Pt    0.3927    0.0599    0.9974
Pt    0.3770    0.2040    0.1211
Pt    0.3521    0.0595    0.0008
Pt    0.4107    0.0012    0.1199
Pt    0.4542    0.1205    0.1201
Pt    0.2481    0.0600    0.0616
Pt    0.3332    0.2067    0.1210
Pt    0.4355    0.0613    0.9973
Pt    0.4364    0.0994    0.1162
Pt    0.2901    0.9979    0.0391
Pt    0.4144    0.1164    0.1199
Pt    0.3555    0.1854    0.1212
Pt    0.3315    0.1225    0.1200
Pt    0.2500    0.2051    0.9981
Pt    0.3539    0.1850    0.9989
Pt    0.3325    0.2467    0.9977
Pt    0.4964    0.0182    0.0200
Pt    0.3964    0.1846    0.1209
Pt    0.2895    0.9968    0.9982
Pt    0.2685    0.0597    0.9982
Pt    0.3524    0.2279    0.0003
Pt    0.3752    0.1642    0.1215
Pt    0.4851    0.0780    0.1214
Pt    0.4958    0.9998    0.9969
Pt    0.2475    0.0397    0.1648
Pt    0.2492    0.0790    0.1243
Pt    0.2467    0.9971    0.1243
Pt    0.2892    0.0372    0.1665
Pt    0.2878    0.0379    0.2053
Pt    0.2481    0.1228    0.1622
Pt    0.2888    0.0788    0.1644
Pt    0.2905    0.0793    0.2043
Pt    0.3102    0.9970    0.2288
Pt    0.2902    0.1206    0.1630
Pt    0.2892    0.1215    0.2046
Pt    0.2513    0.0380    0.2065
Pt    0.2935    0.1625    0.1626
Pt    0.2892    0.1616    0.2049
Pt    0.2492    0.1861    0.1444
Pt    0.2919    0.2065    0.1628
Pt    0.2894    0.2064    0.2028
Pt    0.3324    0.2463    0.2452
[truncated: 1,160,580 more chars]
