# Supplementary material
Source: publisher figshare collection journal article supplement (https://rs.figshare.com/ndownloader/files/37464464)
Supplement: Supplementary file 2 [file 37464464 › Ordered_Nanoporous_Metals_SI/ONMs_EAM_Potential_files/EAM_Ag.Sheng.lammps.eam]

# EAM potentials generated by H.W.Sheng (hsheng@gmu.edu) on Wed May 19 05:44:35 2010
#
##
   2  Ag1 Ag2   
 1001   1.0000000000000000e-03 1001   6.0000000000000001e-03   6.0000000000000000e+00 # nrho drho nr dr cutoff
   47 107.90  0 dummy #Atomic_number  atomic_mass (g/cm^3) lattice_constant lattice_type
 -2.7879188654832432e-01 -2.9641800707930072e-01 -3.1396005122850112e-01 -3.3141802590632397e-01 -3.4879194259023499e-01
 -3.6608181729059752e-01 -3.8328767051650225e-01 -4.0040952724159773e-01 -4.1744741686992010e-01 -4.3440137320172345e-01
 -4.5127143439930972e-01 -4.6805764295285890e-01 -4.8476004564625913e-01 -5.0137869352293674e-01 -5.1791364185168620e-01
 -5.3436495009250062e-01 -5.5073268186240154e-01 -5.6701690490126877e-01 -5.8321769103767140e-01 -5.9933511615469670e-01
 -6.1536926015578097e-01 -6.3132020693053947e-01 -6.4718804432059673e-01 -6.6297286408541600e-01 -6.7867476186812992e-01
 -6.9429383716137061e-01 -7.0983019327309926e-01 -7.2528393729243712e-01 -7.4065518005549413e-01 -7.5594403611120087e-01
 -7.7115062368713705e-01 -7.8627506465536257e-01 -8.0131748449824691e-01 -8.1627801227430019e-01 -8.3115678058400233e-01
 -8.4595392553563331e-01 -8.6066958671110372e-01 -8.7530390713178441e-01 -8.8985703322433696e-01 -9.0432911478654332e-01
 -9.1872030495313628e-01 -9.3303076016162934e-01 -9.4726064011814681e-01 -9.6141010776325408e-01 -9.7547932923778780e-01
 -9.8946847384868530e-01 -1.0033777140348155e+00 -1.0172072253328086e+00 -1.0309571863428864e+00 -1.0446277786946916e+00
 -1.0582191870131195e+00 -1.0717315988841460e+00 -1.0851652048206599e+00 -1.0985201982282913e+00 -1.1117967753712421e+00
 -1.1249951353381167e+00 -1.1381154800077515e+00 -1.1511580140150453e+00 -1.1641229447167887e+00 -1.1770104821574956e+00
 -1.1898208390352318e+00 -1.2025542306674462e+00 -1.2152108749567998e+00 -1.2277909923569972e+00 -1.2402948058386154e+00
 -1.2527225408549343e+00 -1.2650744253077675e+00 -1.2773506895132907e+00 -1.2895515661678743e+00 -1.3016772903139109e+00
 -1.3137280993056470e+00 -1.3257042327750130e+00 -1.3376059325974523e+00 -1.3494334428577524e+00 -1.3611870098158745e+00
 -1.3728668818727841e+00 -1.3844733095362802e+00 -1.3960065453868260e+00 -1.4074668440433793e+00 -1.4188544621292216e+00
 -1.4301696582377894e+00 -1.4414126928985032e+00 -1.4525838285425983e+00 -1.4636833294689544e+00 -1.4747114618099266e+00
 -1.4856684934971742e+00 -1.4965546942274917e+00 -1.5073703354286383e+00 -1.5181156902251689e+00 -1.5287910334042631e+00
 -1.5393966413815563e+00 -1.5499327921669690e+00 -1.5603997653305368e+00 -1.5707978419682418e+00 -1.5811273046678409e+00
 -1.5913884374746974e+00 -1.6015815258576103e+00 -1.6117068566746440e+00 -1.6217647181389598e+00 -1.6317553997846448e+00
 -1.6416791924325418e+00 -1.6515363881560809e+00 -1.6613272802471077e+00 -1.6710521631817155e+00 -1.6807113325860725e+00
 -1.6903050852022548e+00 -1.6998337188540749e+00 -1.7092975324129125e+00 -1.7186968257635440e+00 -1.7280318997699728e+00
 -1.7373030562412595e+00 -1.7465105978973521e+00 -1.7556548283349156e+00 -1.7647360519931630e+00 -1.7737545741196843e+00
 -1.7827107007362770e+00 -1.7916047386047773e+00 -1.8004369951928878e+00 -1.8092077786400098e+00 -1.8179173977230729e+00
 -1.8265661618223639e+00 -1.8351543808873585e+00 -1.8436823654025498e+00 -1.8521504263532809e+00 -1.8605588751915709e+00
 -1.8689080238019495e+00 -1.8771981844672845e+00 -1.8854296698346120e+00 -1.8936027928809671e+00 -1.9017178668792138e+00
 -1.9097752053638757e+00 -1.9177751220969643e+00 -1.9257179310338108e+00 -1.9336039462888965e+00 -1.9414334821016808e+00
 -1.9492068528024336e+00 -1.9569243727780630e+00 -1.9645863564379487e+00 -1.9721931181797683e+00 -1.9797449723553302e+00
 -1.9872422332364026e+00 -1.9946852149805434e+00 -2.0020742315969304e+00 -2.0094095969121932e+00 -2.0166916245362394e+00
 -2.0239206278280886e+00 -2.0310969198617004e+00 -2.0382208133918041e+00 -2.0452926208197315e+00 -2.0523126541592434e+00
 -2.0592812250023629e+00 -2.0661986444852021e+00 -2.0730652232537965e+00 -2.0798812714299304e+00 -2.0866470985769716e+00
 -2.0933630136656975e+00 -2.1000293250401274e+00 -2.1066463403833522e+00 -2.1132143666833638e+00 -2.1197337101988873e+00
 -2.1262046764252078e+00 -2.1326275700600030e+00 -2.1390026949691725e+00 -2.1453303541526689e+00 -2.1516108497103250e+00
 -2.1578444828076866e+00 -2.1640315536418431e+00 -2.1701723614072548e+00 -2.1762672042615847e+00 -2.1823163792915290e+00
 -2.1883201824786456e+00 -2.1942789086651868e+00 -2.2001928515199261e+00 -2.2060623035039910e+00 -2.2118875558366913e+00
 -2.2176688984613513e+00 -2.2234066200111364e+00 -2.2291010077748874e+00 -2.2347523476629467e+00 -2.2403609241729923e+00
 -2.2459270203558637e+00 -2.2514509177813959e+00 -2.2569328965042459e+00 -2.2623732350297265e+00 -2.2677722102796336e+00
 -2.2731300975580755e+00 -2.2784471705173086e+00 -2.2837237011235585e+00 -2.2889599596228614e+00 -2.2941562145068808e+00
 -2.2993127324787501e+00 -2.3044297784188954e+00 -2.3095076153508680e+00 -2.3145465044071729e+00 -2.3195467047951013e+00
 -2.3245084737625588e+00 -2.3294320665638955e+00 -2.3343177364257386e+00 -2.3391657345128181e+00 -2.3439763098938009e+00
 -2.3487497095071186e+00 -2.3534861781271808e+00 -2.3581859583404743e+00 -2.3628492905467890e+00 -2.3674764129703272e+00
 -2.3720675616711984e+00 -2.3766229705569146e+00 -2.3811428713938829e+00 -2.3856274938189008e+00 -2.3900770653506478e+00
 -2.3944918114011826e+00 -2.3988719552874342e+00 -2.4032177182426988e+00 -2.4075293194281304e+00 -2.4118069759442373e+00
 -2.4160509028423758e+00 -2.4202613131362436e+00 -2.4244384178133731e+00 -2.4285824258466269e+00 -2.4326935442056916e+00
 -2.4367719778685704e+00 -2.4408179298330790e+00 -2.4448316011283375e+00 -2.4488131908262663e+00 -2.4527628960530787e+00
 -2.4566809120007771e+00 -2.4605674319386428e+00 -2.4644226472247350e+00 -2.4682467473173810e+00 -2.4720399197866723e+00
 -2.4758023503259565e+00 -2.4795342227633350e+00 -2.4832357190731531e+00 -2.4869070193874951e+00 -2.4905483020076802e+00
 -2.4941597434157545e+00 -2.4977415182859843e+00 -2.5012937994963536e+00 -2.5048167581400542e+00 -2.5083105635369813e+00
 -2.5117753832452290e+00 -2.5152113830725806e+00 -2.5186187270880072e+00 -2.5219975776331571e+00 -2.5253480953338534e+00
 -2.5286704391115862e+00 -2.5319647661950073e+00 -2.5352312321314225e+00 -2.5384699907982893e+00 -2.5416811944147066e+00
 -2.5448649935529111e+00 -2.5480215371497716e+00 -2.5511509725182817e+00 -2.5542534453590537e+00 -2.5573290997718150e+00
 -2.5603780782668983e+00 -2.5634005217767393e+00 -2.5663965696673681e+00 -2.5693663597499037e+00 -2.5723100282920499e+00
 -2.5752277100295862e+00 -2.5781195381778645e+00 -2.5809856444433015e+00 -2.5838261590348734e+00 -2.5866412106756091e+00
 -2.5894309266140860e+00 -2.5921954326359216e+00 -2.5949348530752689e+00 -2.5976493108263106e+00 -2.6003389273547519e+00
 -2.6030038227093164e+00 -2.6056441155332379e+00 -2.6082599230757562e+00 -2.6108513612036091e+00 -2.6134185444125286e+00
 -2.6159615858387344e+00 -2.6184805972704268e+00 -2.6209756891592804e+00 -2.6234469706319401e+00 -2.6258945495015142e+00
 -2.6283185322790672e+00 -2.6307190241851162e+00 -2.6330961291611215e+00 -2.6354499498809840e+00 -2.6377805877625380e+00
 -2.6400881429790442e+00 -2.6423727144706839e+00 -2.6446343999560549e+00 -2.6468732959436632e+00 -2.6490894977434190e+00
 -2.6512830994781278e+00 -2.6534541940949881e+00 -2.6556028733770822e+00 -2.6577292279548725e+00 -2.6598333473176941e+00
 -2.6619153198252485e+00 -2.6639752327190993e+00 -2.6660131721341651e+00 -2.6680292231102127e+00 -2.6700234696033527e+00
 -2.6719959944975331e+00 -2.6739468796160324e+00 -2.6758762057329539e+00 -2.6777840525847205e+00 -2.6796704988815683e+00
 -2.6815356223190396e+00 -2.6833794995894786e+00 -2.6852022063935239e+00 -2.6870038174516040e+00 -2.6887844065154289e+00
 -2.6905440463794874e+00 -2.6922828088925375e+00 -2.6940007649691040e+00 -2.6956979846009697e+00 -2.6973745368686703e+00
 -2.6990304899529889e+00 -2.7006659111464488e+00 -2.7022808668648097e+00 -2.7038754226585593e+00 -2.7054496432244077e+00
 -2.7070035924167835e+00 -2.7085373332593248e+00 -2.7100509279563751e+00 -2.7115444379044780e+00 -2.7130179237038679e+00
 -2.7144714451699676e+00 -2.7159050613448805e+00 -2.7173188305088853e+00 -2.7187128101919282e+00 -2.7200870571851201e+00
 -2.7214416275522275e+00 -2.7227765766411687e+00 -2.7240919590955062e+00 -2.7253878288659417e+00 -2.7266642392218094e+00
 -2.7279212427625712e+00 -2.7291588914293090e+00 -2.7303772365162198e+00 -2.7315763286821100e+00 -2.7327562179618883e+00
 -2.7339169537780599e+00 -2.7350585849522213e+00 -2.7361811597165540e+00 -2.7372847257253183e+00 -2.7383693300663472e+00
 -2.7394350192725399e+00 -2.7404818393333570e+00 -2.7415098357063146e+00 -2.7425190533284760e+00 -2.7435095366279483e+00
 -2.7444813295353754e+00 -2.7454344754954318e+00 -2.7463690174783171e+00 -2.7472849979912484e+00 -2.7481824590899571e+00
 -2.7490614423901807e+00 -2.7499219890791569e+00 -2.7507641399271199e+00 -2.7515879352987902e+00 -2.7523934151648732e+00
 -2.7531806191135493e+00 -2.7539495863619710e+00 -2.7547003557677550e+00 -2.7554329658404764e+00 -2.7561474547531630e+00
 -2.7568438603537899e+00 -2.7575222201767722e+00 -2.7581825714544603e+00 -2.7588249511286334e+00 -2.7594493958619921e+00
 -2.7600559420496547e+00 -2.7606446258306505e+00 -2.7612154830994124e+00 -2.7617685495172730e+00 -2.7623038605239567e+00
 -2.7628214513490748e+00 -2.7633213570236190e+00 -2.7638036123914569e+00 -2.7642682521208228e+00 -2.7647153107158151e+00
 -2.7651448225278883e+00 -2.7655568217673467e+00 -2.7659513425148412e+00 -2.7663284187328587e+00 -2.7666880842772210e+00
 -2.7670303729085757e+00 -2.7673553183038897e+00 -2.7676629540679465e+00 -2.7679533137448367e+00 -2.7682264308294542e+00
 -2.7684823387789894e+00 -2.7687210710244226e+00 -2.7689426609820198e+00 -2.7691471420648242e+00 -2.7693345476941524e+00
 -2.7695049113110874e+00 -2.7696582663879723e+00 -2.7697946464399057e+00 -2.7699140850362332e+00 -2.7700166158120441e+00
 -2.7701022724796642e+00 -2.7701710888400299e+00 -2.7702230987909759e+00 -2.7702583363276787e+00 -2.7702768355400091e+00
 -2.7702786306097704e+00 -2.7702637558079322e+00 -2.7702322454918669e+00 -2.7701841341025846e+00 -2.7701194561619693e+00
 -2.7700382462700150e+00 -2.7699405391020595e+00 -2.7698263694060219e+00 -2.7696957719996367e+00 -2.7695487817676914e+00
 -2.7693854336592594e+00 -2.7692057626849378e+00 -2.7690098039140825e+00 -2.7687975924720427e+00 -2.7685691635373977e+00
 -2.7683245523391933e+00 -2.7680637941541741e+00 -2.7677869243040236e+00 -2.7674939781525953e+00 -2.7671849911031519e+00
 -2.7668599985955993e+00 -2.7665190361037215e+00 -2.7661621391324189e+00 -2.7657893432149399e+00 -2.7654006839101202e+00
 -2.7649961967996162e+00 -2.7645759174851419e+00 -2.7641398815857037e+00 -2.7636881247348355e+00 -2.7632206825778360e+00
 -2.7627375907690035e+00 -2.7622388849688702e+00 -2.7617246008414393e+00 -2.7611947740514209e+00 -2.7606494402614667e+00
 -2.7600886351294052e+00 -2.7595123943054789e+00 -2.7589207534295777e+00 -2.7583137481284776e+00 -2.7576914140130726e+00
 -2.7570537866756135e+00 -2.7564009016869417e+00 -2.7557327945937247e+00 -2.7550495009156935e+00 -2.7543510561428759e+00
 -2.7536374957328338e+00 -2.7529088551078980e+00 -2.7521651696524039e+00 -2.7514064747099276e+00 -2.7506328055805205e+00
 -2.7498441975179464e+00 -2.7490406857269156e+00 -2.7482223053603207e+00 -2.7473890915164736e+00 -2.7465410792363394e+00
 -2.7456783035007737e+00 -2.7448007992277557e+00 -2.7439086012696268e+00 -2.7430017444103241e+00 -2.7420802633626167e+00
 -2.7411441927653413e+00 -2.7401935671806372e+00 -2.7392284210911844e+00 -2.7382487888974345e+00 -2.7372547049148515e+00
 -2.7362462033711430e+00 -2.7352233184035000e+00 -2.7341860840558279e+00 -2.7331345342759867e+00 -2.7320687029130224e+00
 -2.7309886237144063e+00 -2.7298943303232681e+00 -2.7287858562756320e+00 -2.7276632349976531e+00 -2.7265264998028531e+00
 -2.7253756838893537e+00 -2.7242108203371158e+00 -2.7230319421051714e+00 -2.7218390820288616e+00 -2.7206322728170726e+00
 -2.7194115470494684e+00 -2.7181769371737294e+00 -2.7169284755027872e+00 -2.7156661942120581e+00 -2.7143901253366827e+00
 -2.7131003007687577e+00 -2.7117967522545738e+00 -2.7104795113918505e+00 -2.7091486096269715e+00 -2.7078040782522206e+00
 -2.7064459484030174e+00 -2.7050742510551533e+00 -2.7036890170220262e+00 -2.7022902769518762e+00 -2.7008780613250218e+00
 -2.6994524004510954e+00 -2.6980133244662783e+00 -2.6965608633305371e+00 -2.6950950468248585e+00 -2.6936159045484862e+00
 -2.6921234659161550e+00 -2.6906177601553267e+00 -2.6890988163034271e+00 -2.6875666632050792e+00 -2.6860213295093414e+00
 -2.6844628436669411e+00 -2.6828912339275113e+00 -2.6813065283368265e+00 -2.6797087547340368e+00 -2.6780979407489047e+00
 -2.6764741137990415e+00 -2.6748373010871407e+00 -2.6731875295982150e+00 -2.6715248260968325e+00 -2.6698492171243506e+00
 -2.6681607289961526e+00 -2.6664593877988843e+00 -2.6647452193876866e+00 -2.6630182493834345e+00 -2.6612785031699713e+00
 -2.6595260058913430e+00 -2.6577607824490364e+00 -2.6559828574992119e+00 -2.6541922554499413e+00 -2.6523890004584434e+00
 -2.6505731164283173e+00 -2.6487446270067805e+00 -2.6469035555819040e+00 -2.6450499252798458e+00 -2.6431837589620901e+00
 -2.6413050792226795e+00 -2.6394139083854533e+00 -2.6375102685012810e+00 -2.6355941813452990e+00 -2.6336656684141460e+00
 -2.6317247509231989e+00 -2.6297714498038074e+00 -2.6278057857005312e+00 -2.6258277789683744e+00 -2.6238374496700212e+00
 -2.6218348175730712e+00 -2.6198199021472766e+00 -2.6177927225617768e+00 -2.6157532976823323e+00 -2.6137016460685638e+00
 -2.6116377859711850e+00 -2.6095617353292395e+00 -2.6074735117673358e+00 -2.6053731325928831e+00 -2.6032606147933270e+00
 -2.6011359750333853e+00 -2.5989992296522835e+00 -2.5968503946609895e+00 -2.5946894857394507e+00 -2.5925165182338290e+00
 -2.5903315071537358e+00 -2.5881344671694677e+00 -2.5859254126092441e+00 -2.5837043574564391e+00 -2.5814713153468207e+00
 -2.5792262995657844e+00 -2.5769693230455899e+00 -2.5747003983625949e+00 -2.5724195377344929e+00 -2.5701267530175471e+00
 -2.5678220557038283e+00 -2.5655054569184466e+00 -2.5631769674167915e+00 -2.5608365975817637e+00 -2.5584843574210132e+00
 -2.5561202565641743e+00 -2.5537443042601002e+00 -2.5513565093741000e+00 -2.5489568803851732e+00 -2.5465454253832456e+00
 -2.5441221520664064e+00 -2.5416870677381409e+00 -2.5392401793045685e+00 -2.5367814932716772e+00 -2.5343110157425595e+00
 -2.5318287524146483e+00 -2.5293347085769522e+00 -2.5268288891072905e+00 -2.5243112984695300e+00 -2.5217819407108197e+00
 -2.5192408194588269e+00 -2.5166879379189733e+00 -2.5141232988716684e+00 -2.5115469046695473e+00 -2.5089587572347067e+00
 -2.5063588580559379e+00 -2.5037472081859651e+00 -2.5011238082386784e+00 -2.4984886583863726e+00 -2.4958417583569803e+00
 -2.4931831074313076e+00 -2.4905127044403690e+00 -2.4878305477652458e+00 -2.4851366353433688e+00 -2.4824309646773246e+00
 -2.4797135328437605e+00 -2.4769843365022930e+00 -2.4742433719044090e+00 -2.4714906349023757e+00 -2.4687261209581424e+00
 -2.4659498251522471e+00 -2.4631617421927241e+00 -2.4603618664240061e+00 -2.4575501918358311e+00 -2.4547267120721492e+00
 -2.4518914204400257e+00 -2.4490443099185475e+00 -2.4461853731677294e+00 -2.4433146025374191e+00 -2.4404319900762008e+00
 -2.4375375275403042e+00 -2.4346312064025071e+00 -2.4317130178610418e+00 -2.4287829528484997e+00 -2.4258410020407397e+00
 -2.4228871558657894e+00 -2.4199214045127539e+00 -2.4169437379407195e+00 -2.4139541458876601e+00 -2.4109526178793415e+00
 -2.4079391432382287e+00 -2.4049137110923895e+00 -2.4018763103844010e+00 -2.3988269298802547e+00 -2.3957655581782618e+00
 -2.3926921837179589e+00 -2.3896067947890138e+00 -2.3865093795401306e+00 -2.3833999259879550e+00 -2.3802784220259796e+00
 -2.3771448554334498e+00 -2.3739992138842689e+00 -2.3708414849559047e+00 -2.3676716561382936e+00 -2.3644897148427453e+00
 -2.3612956484108505e+00 -2.3580894441233857e+00 -2.3548710892092175e+00 -2.3516405708542090e+00 -2.3483978762101247e+00
 -2.3451429924035367e+00 -2.3418759065447299e+00 -2.3385966057366065e+00 -2.3353050770835933e+00 -2.3320013077005459e+00
 -2.3286852847216535e+00 -2.3253569953093458e+00 -2.3220164266631982e+00 -2.3186635660288371e+00 -2.3152984007068440e+00
 -2.3119209180616629e+00 -2.3085311055305051e+00 -2.3051289506322550e+00 -2.3017144409763737e+00 -2.2982875642718072e+00
 -2.2948483083358897e+00 -2.2913966611032506e+00 -2.2879326106347180e+00 -2.2844561451262271e+00 -2.2809672529177227e+00
 -2.2774659225020661e+00 -2.2739521425339406e+00 -2.2704259018387565e+00 -2.2668871894215568e+00 -2.2633359944759226e+00
 -2.2597723063928785e+00 -2.2561961147697986e+00 -2.2526074094193107e+00 -2.2490061803782027e+00 -2.2453924179163285e+00
 -2.2417661125455122e+00 -2.2381272550284548e+00 -2.2344758363876380e+00 -2.2308118479142314e+00 -2.2271352811769978e+00
 -2.2234461280311972e+00 -2.2197443806274935e+00 -2.2160300314208596e+00 -2.2123030731794828e+00 -2.2085634989936702e+00
 -2.2048113022847549e+00 -2.2010464768140006e+00 -2.1972690166915063e+00 -2.1934789163851138e+00 -2.1896761707293124e+00
 -2.1858607749341430e+00 -2.1820327245941051e+00 -2.1781920156970624e+00 -2.1743386446331461e+00 -2.1704726082036636e+00
 -2.1665939036300008e+00 -2.1627025285625296e+00 -2.1587984810895131e+00 -2.1548817597460102e+00 -2.1509523635227819e+00
 -2.1470102918751954e+00 -2.1430555447321318e+00 -2.1390881225048899e+00 -2.1351080260960922e+00 -2.1311152569085898e+00
 -2.1271098168543681e+00 -2.1230917083634533e+00 -2.1190609343928162e+00 -2.1150174984352788e+00 -2.1109614045284197e+00
 -2.1068926572634785e+00 -2.1028112617942623e+00 -2.0987172238460516e+00 -2.0946105497245036e+00 -2.0904912463245600e+00
 -2.0863593211393514e+00 -2.0822147822691033e+00 -2.0780576384300398e+00 -2.0738878989632918e+00 -2.0697055738438004e+00
 -2.0655106736892228e+00 -2.0613032097688384e+00 -2.0570831940124537e+00 -2.0528506390193071e+00 -2.0486055580669769e+00
 -2.0443479651202834e+00 -2.0400778748401960e+00 -2.0357953025927391e+00 -2.0315002644578972e+00 -2.0271927772385196e+00
 -2.0228728584692268e+00 -2.0185405264253156e+00 -2.0141958001316644e+00 -2.0098386993716386e+00 -2.0054692446959965e+00
 -2.0010874574317947e+00 -1.9966933596912935e+00 -1.9922869743808613e+00 -1.9878683252098821e+00 -1.9834374366996590e+00
 -1.9789943341923211e+00 -1.9745390438597277e+00 -1.9700715927123751e+00 -1.9655920086083007e+00 -1.9611003202619894e+00
 -1.9565965572532791e+00 -1.9520807500362651e+00 -1.9475529299482068e+00 -1.9430131292184325e+00 -1.9384613809772451e+00
 -1.9338977192648268e+00 -1.9293221790401462e+00 -1.9247347961898618e+00 -1.9201356075372289e+00 -1.9155246508510047e+00
 -1.9109019648543528e+00 -1.9062675892337506e+00 -1.9016215646478929e+00 -1.8969639327365979e+00 -1.8922947361297133e+00
 -1.8876140184560213e+00 -1.8829218243521435e+00 -1.8782181994714477e+00 -1.8735031904929516e+00 -1.8687768451302298e+00
 -1.8640392121403186e+00 -1.8592903413326212e+00 -1.8545302835778141e+00 -1.8497590908167512e+00 -1.8449768160693703e+00
 -1.8401835134435980e+00 -1.8353792381442560e+00 -1.8305640464819652e+00 -1.8257379958820523e+00 -1.8209011448934547e+00
 -1.8160535531976265e+00 -1.8111952816174424e+00 -1.8063263921261057e+00 -1.8014469478560518e+00 -1.7965570131078539e+00
 -1.7916566533591292e+00 -1.7867459352734436e+00 -1.7818249267092177e+00 -1.7768936967286322e+00 -1.7719523156065329e+00
 -1.7670008548393363e+00 -1.7620393871539357e+00 -1.7570679865166055e+00 -1.7520867281419084e+00 -1.7470956885015982e+00
 -1.7420949453335282e+00 -1.7370845776505544e+00 -1.7320646657494425e+00 -1.7270352912197720e+00 -1.7219965369528429e+00
 -1.7169484871505802e+00 -1.7118912273342195e+00 -1.7068248443472487e+00 -1.7017494263437785e+00 -1.6966650627711681e+00
 -1.6915718443524330e+00 -1.6864698630686505e+00 -1.6813592121413667e+00 -1.6762399860150026e+00 -1.6711122803392611e+00
 -1.6659761919515326e+00 -1.6608318188593025e+00 -1.6556792602225570e+00 -1.6505186163361891e+00 -1.6453499886124068e+00
 -1.6401734795631375e+00 -1.6349891927824358e+00 -1.6297972329288897e+00 -1.6245977057080265e+00 -1.6193907178547200e+00
 -1.6141763771155966e+00 -1.6089547922314420e+00 -1.6037260729196072e+00 -1.5984903298564153e+00 -1.5932476746595681e+00
 -1.5879982198705522e+00 -1.5827420789370459e+00 -1.5774793661953252e+00 -1.5722101968526705e+00 -1.5669346869697731e+00
 -1.5616529534431414e+00 -1.5563651139875081e+00 -1.5510712871182355e+00 -1.5457715921337232e+00 -1.5404661490978133e+00
 -1.5351550788221981e+00 -1.5298385028488259e+00 -1.5245165434323074e+00 -1.5191893235223222e+00 -1.5138569667460255e+00
 -1.5085195973904550e+00 -1.5031773403849360e+00 -1.4978303212834891e+00 -1.4924786662472362e+00 -1.4871225020268071e+00
 -1.4817619559447455e+00 -1.4763971558779163e+00 -1.4710282302399114e+00 -1.4656553079634564e+00 -1.4602785184828169e+00
 -1.4548979917162055e+00 -1.4495138580481874e+00 -1.4441262483120876e+00 -1.4387352937723970e+00 -1.4333411261071789e+00
 -1.4279438773904756e+00 -1.4225436800747151e+00 -1.4171406669731166e+00 -1.4117349712420981e+00 -1.4063267263636821e+00
 -1.4009160661279028e+00 -1.3955031246152116e+00 -1.3900880361788843e+00 -1.3846709354274274e+00 -1.3792519572069843e+00
 -1.3738312365837424e+00 -1.3684089088263385e+00 -1.3629851093882661e+00 -1.3575599738902824e+00 -1.3521336381028131e+00
 -1.3467062379283599e+00 -1.3412779093839071e+00 -1.3358487885833283e+00 -1.3304190117197916e+00 -1.3249887150481670e+00
 -1.3195580348674329e+00 -1.3141271075030825e+00 -1.3086960692895300e+00 -1.3032650565525170e+00 -1.2978342055915193e+00
 -1.2924036526621538e+00 -1.2869735339585833e+00 -1.2815439855959252e+00 -1.2761151435926559e+00 -1.2706871438530190e+00
 -1.2652601221494302e+00 -1.2598342141048851e+00 -1.2544095551753647e+00 -1.2489862806322429e+00 -1.2435645255446914e+00
 -1.2381444247620879e+00 -1.2327261128964213e+00 -1.2273097243046984e+00 -1.2218953930713514e+00 -1.2164832529906429e+00
 -1.2110734375490728e+00 -1.2056660799077858e+00 -1.2002613128849764e+00 -1.1948592689382962e+00 -1.1894600801472599e+00
 -1.1840638781956527e+00 -1.1786707943539354e+00 -1.1732809594616516e+00 -1.1678945039098347e+00 -1.1625115576234135e+00
 -1.1571322500436185e+00 -1.1517567101103896e+00 -1.1463850662447812e+00 -1.1410174463313694e+00 -1.1356539777006587e+00
 -1.1302947871114872e+00 -1.1249400007334351e+00 -1.1195897441292288e+00 -1.1142441422371494e+00 -1.1089033193534386e+00
 -1.1035673991147035e+00 -1.0982365044803259e+00 -1.0929107577148667e+00 -1.0875902803704729e+00 -1.0822751932692847e+00
 -1.0769656164858410e+00 -1.0716616693294860e+00 -1.0663634703267766e+00 -1.0610711372038879e+00 -1.0557847868690202e+00
 -1.0505045353948050e+00 -1.0452304980007114e+00 -1.0399627890354535e+00 -1.0347015219593962e+00 -1.0294468093269611e+00
 -1.0241987627690343e+00 -1.0189574929753715e+00 -1.0137231096770054e+00 -1.0084957216286523e+00 -1.0032754365911174e+00
 -9.9806236131370252e-01 -9.9285660151661126e-01 -9.8765826187335726e-01 -9.8246744599316893e-01 -9.7728425640339711e-01
 -9.7210879453192067e-01 -9.6694116068955360e-01 -9.6178145405245108e-01 -9.5662977264451599e-01 -9.5148621331980598e-01
 -9.4635087174493904e-01 -9.4122384238150048e-01 -9.3610521846844896e-01 -9.3099509200452391e-01 -9.2589355373065085e-01
 -9.2080069311234858e-01 -9.1571659832213526e-01 -9.1064135622193509e-01 -9.0557505234548508e-01 -9.0051777088074081e-01
 -8.9546959465228293e-01 -8.9043060510372474e-01 -8.8540088228011715e-01 -8.8038050481035623e-01 -8.7536954988958926e-01
 -8.7036809326162112e-01 -8.6537620920132086e-01 -8.6039397049702815e-01 -8.5542144843295997e-01 -8.5045871277161655e-01
 -8.4550583173618854e-01 -8.4056287199296265e-01 -8.3562989863372894e-01 -8.3070697515818648e-01 -8.2579416345635093e-01
 -8.2089152379095931e-01 -8.1599911477987830e-01 -8.1111699337850940e-01 -8.0624521486219636e-01 -8.0138383280863046e-01
 -7.9653289908025815e-01 -7.9169246380668667e-01 -7.8686257536709148e-01 -7.8204328037262127e-01 -7.7723462364880602e-01
 -7.7243664821796221e-01 -7.6764939528160003e-01 -7.6287290420282960e-01 -7.5810721248876700e-01 -7.5335235577294224e-01
 -7.4860836779770323e-01 -7.4387528039662487e-01 -7.3915312347691375e-01 -7.3444192500181504e-01 -7.2974171097301943e-01
 -7.2505250541306920e-01 -7.2037433034776466e-01 -7.1570720578857072e-01 -7.1105114971502359e-01 -7.0640617805713624e-01
 -7.0177230467780638e-01 -6.9714954135522156e-01 -6.9253789776526697e-01 -6.8793738146393069e-01 -6.8334799786971057e-01
 -6.7876975024602126e-01
  1.0000000000000000e+00  9.9999760073416455e-01  9.9999802142533367e-01  1.0000013220353126e+00  1.0000076584647948e+00
  1.0000173305228064e+00  1.0000308293188411e+00  1.0000488637654370e+00  1.0000723224320549e+00  1.0001022044611771e+00
  1.0001395488771090e+00  1.0001853641696861e+00  1.0002405723086689e+00  1.0003060074560213e+00  1.0003824463833229e+00
  1.0004706410657553e+00  1.0005713512137668e+00  1.0006853717511637e+00  1.0008135366934197e+00  1.0009567064951883e+00
  1.0011157539241200e+00  1.0012915499458626e+00  1.0014849512574038e+00  1.0016967973755246e+00  1.0019279158004928e+00
  1.0021791281009957e+00  1.0024512559989380e+00  1.0027451269339569e+00  1.0030615758495536e+00  1.0034014431295770e+00
  1.0037655719797154e+00  1.0041548058067540e+00  1.0045699857570174e+00  1.0050119497191548e+00  1.0054815331257601e+00
  1.0059795700792362e+00  1.0065068944803228e+00  1.0070643411095070e+00  1.0076527461522797e+00  1.0082729468998903e+00
  1.0089257812659205e+00  1.0096120873003587e+00  1.0103327027171269e+00  1.0110884646284968e+00  1.0118802096503008e+00
  1.0127087741090601e+00  1.0135749942512136e+00  1.0144797064486528e+00  1.0154237473289223e+00  1.0164079537417883e+00
  1.0174331626707800e+00  1.0185002111431010e+00  1.0196099361405093e+00  1.0207631745370349e+00  1.0219607631075522e+00
  1.0232035385653833e+00  1.0244923376010864e+00  1.0258279969210058e+00  1.0272113532764757e+00  1.0286432434629158e+00
  1.0301245043039533e+00  1.0316559726347208e+00  1.0332384852852108e+00  1.0348728790668071e+00  1.0365599907713701e+00
  1.0383006571778814e+00  1.0400957150596348e+00  1.0419460011914152e+00  1.0438523523556260e+00  1.0458156053432766e+00
  1.0478365969512378e+00  1.0499161639791459e+00  1.0520551432263074e+00  1.0542543714889463e+00  1.0565146855595102e+00
  1.0588369222277878e+00  1.0612219182822411e+00  1.0636705105113387e+00  1.0661835357047813e+00  1.0687618306539166e+00
  1.0714062321512963e+00  1.0741175769901006e+00  1.0768967019635662e+00  1.0797444438644443e+00  1.0826616394847717e+00
  1.0856491256160414e+00  1.0887077390494517e+00  1.0918383165761505e+00  1.0950416949874742e+00  1.0983187110750670e+00
  1.1016702016308173e+00  1.1050970034467520e+00  1.1085999533149302e+00  1.1121798880273390e+00  1.1158376443758347e+00
  1.1195740591521635e+00  1.1233899691480076e+00  1.1272862111550301e+00  1.1312636219649210e+00  1.1353230383694259e+00
  1.1394652971603392e+00  1.1436912351294850e+00  1.1480016890686977e+00  1.1523974957698027e+00  1.1568794920246022e+00
  1.1614485146248772e+00  1.1661054003623941e+00  1.1708509860289142e+00  1.1756861084162011e+00  1.1806116043160266e+00
  1.1856283105201721e+00  1.1907370638204249e+00  1.1959387010085765e+00  1.2012340588764201e+00  1.2066239742157465e+00
  1.2121092838183449e+00  1.2176908244760007e+00  1.2233694329804952e+00  1.2291459461236052e+00  1.2350212006971029e+00
  1.2409960334927577e+00  1.2470712813023412e+00  1.2532477809176314e+00  1.2595263691304173e+00  1.2659078827325014e+00
  1.2723931585156973e+00  1.2789830332718171e+00  1.2856783437926604e+00  1.2924799268700033e+00  1.2993886192955872e+00
  1.3064052578611272e+00  1.3135306793583355e+00  1.3207657205789507e+00  1.3281112183147645e+00  1.3355680093576459e+00
  1.3431369304995320e+00  1.3508188185323717e+00  1.3586145102480616e+00  1.3665248424383805e+00  1.3745506518949311e+00
  1.3826927754091498e+00  1.3909520497724299e+00  1.3993293117762715e+00  1.4078253982124314e+00  1.4164411458730661e+00
  1.4251773915507338e+00  1.4340349720381282e+00  1.4430147241277311e+00  1.4521174846114624e+00  1.4613440902803434e+00
  1.4706953779244314e+00  1.4801721843333895e+00  1.4897753462972909e+00  1.4995057006074293e+00  1.5093640840571145e+00
  1.5193513334419491e+00  1.5294682855586303e+00  1.5397157772030954e+00  1.5500946451686388e+00  1.5606057262440494e+00
  1.5712498572127098e+00  1.5820278748550567e+00  1.5929406159528436e+00  1.6039889172935167e+00  1.6151736156745633e+00
  1.6264955479061141e+00  1.6379555508060446e+00  1.6495544611902082e+00  1.6612931158622750e+00  1.6731723516035992e+00
  1.6851930051661799e+00  1.6973559132820453e+00  1.7096619126855153e+00  1.7221118401367979e+00  1.7347065324455586e+00
  1.7474468264891669e+00  1.7603335591956566e+00  1.7733675674933200e+00  1.7865496882559189e+00  1.7998807582479004e+00
  1.8133616140785114e+00  1.8269930922302611e+00  1.8407760291721258e+00  1.8547112614867407e+00  1.8687996259976700e+00
  1.8830419598822803e+00  1.8974391006310589e+00  1.9119918857958123e+00  1.9267011526945430e+00  1.9415677381158405e+00
  1.9565924780457764e+00  1.9717762077054999e+00  1.9871197621048520e+00  2.0026239767266230e+00  2.0182896882131032e+00
  2.0341177350187731e+00  2.0501089574474567e+00  2.0662641964518809e+00  2.0825842920490634e+00  2.0990700817258157e+00
  2.1157223988930798e+00  2.1325420725335076e+00  2.1495299297616688e+00  2.1666867994874108e+00  2.1840135161190473e+00
  2.2015109231995651e+00  2.2191798747808242e+00  2.2370212300715653e+00  2.2550358449886447e+00  2.2732245635564845e+00
  2.2915882093928408e+00  2.3101275813839832e+00  2.3288434646018170e+00  2.3477366497253835e+00  2.3668079530153716e+00
  2.3860582361858467e+00  2.4054884187050432e+00  2.4250994562041854e+00  2.4448922960248907e+00  2.4648678308298564e+00
  2.4850268523229904e+00  2.5053700182979863e+00  2.5258978936298959e+00  2.5466110514600953e+00  2.5675101809247463e+00
  2.5885961947913900e+00  2.6098703142819826e+00  2.6313339956517927e+00  2.6529887014535634e+00  2.6748356504149200e+00
  2.6968755673101401e+00  2.7191084707010913e+00  2.7415337926245380e+00  2.7641508910584531e+00  2.7869596301461854e+00
  2.8099609608803879e+00  2.8331574411998277e+00  2.8565530764669944e+00  2.8801521897039448e+00  2.9039580840640875e+00
  2.9279717027418415e+00  2.9521903784953265e+00  2.9766078885210647e+00  3.0012167613296277e+00  3.0260111777561782e+00
  3.0509898832893012e+00  3.0761590322019083e+00  3.1015337189860834e+00  3.1271367667308922e+00  3.1529966291521476e+00
  3.1791452681268000e+00  3.0452120632149691e+00  2.9148736227081131e+00  2.7881240391586029e+00  2.6649536007704846e+00
  2.5453489062138512e+00  2.4292929794392073e+00  2.3167653844918408e+00  2.2077423403261900e+00  2.1021968356202105e+00
  2.0000987435897484e+00  1.9014149368029034e+00  1.8061094019943988e+00  1.7141433548799525e+00  1.6254753549706427e+00
  1.5400614203872767e+00  1.4578551426747608e+00  1.3788078016164671e+00  1.3028684800486030e+00  1.2299841786745795e+00
  1.1600999308793787e+00  1.0931589175439238e+00  1.0291025818594464e+00  9.6787074414185525e-01  9.0940171664610459e-01
  8.5363241838056325e-01  8.0049848992138273e-01  7.4993440822686441e-01  7.0187360145183009e-01  6.5624856376198970e-01
  6.1299097014830872e-01  5.7203179124137682e-01  5.3330140812577964e-01  4.9672972715446129e-01  4.6224629476309786e-01
  4.2978041228446440e-01  3.9926125076280083e-01  3.7061796576818473e-01  3.4377981221089682e-01  3.1867625915579012e-01
  2.9523710463665864e-01  2.7339259047060516e-01  2.5307351707241210e-01  2.3421135826890538e-01  2.1673837611332658e-01
  2.0058773569970079e-01  1.8569361997720568e-01  1.7199134456453624e-01  1.5941747256427741e-01  1.4790992937727188e-01
  1.3740811751698612e-01  1.2785303142388083e-01  1.1918737227977960e-01  1.1135566282223541e-01  1.0430436214006560e-01
  9.7981972829954134e-02  9.2339084315638878e-02  8.7328343405617931e-02  8.2904412842554717e-02  7.9023929773302234e-02
  7.5645464218927178e-02  7.2729477544734120e-02  7.0238280930289679e-02  6.8135993839446629e-02  6.6388502490368151e-02
  6.4963418325551942e-02  6.3830036481854396e-02  6.2959294260514775e-02  6.2323729597179293e-02  6.1897439531925454e-02
  6.1656038679286047e-02  6.1576617698273384e-02  6.1637701762403498e-02  6.1819209029720192e-02  6.2102409112819335e-02
  6.2469881548872952e-02  6.2905474269653427e-02  6.3394262071557600e-02  6.3922505085630993e-02  6.4477607247591995e-02
  6.5048074767855957e-02  6.5623474601559387e-02  6.6194392918584144e-02  6.6752393573581537e-02  6.7289976575996530e-02
  6.7800536560091940e-02  6.8278321254972602e-02  6.8718389954609396e-02  6.9116571987863570e-02  6.9469425188510847e-02
  6.9774194365265579e-02  7.0028769771804972e-02  7.0231645576792984e-02  7.0381878333905162e-02  7.0479045451851741e-02
  7.0523203664403081e-02  7.0514847500412481e-02  7.0454867753841660e-02  7.0344509953783801e-02  7.0185332834488620e-02
  6.9979166805385851e-02  6.9728072421109510e-02  6.9434298851522802e-02  6.9100242351741115e-02  6.8728404732157161e-02
  6.8321351828464605e-02  6.7881671971682489e-02  6.7411934458178988e-02  6.6914648188300618e-02  6.6392227344000687e-02
  6.5846980676345937e-02  6.5281112995645568e-02  6.4696727371947510e-02  6.4095827335556646e-02  6.3480319077552888e-02
  6.2852013650309374e-02  6.2212629168010562e-02  6.1563793007170423e-02  6.0907044007150545e-02  6.0243834670678321e-02
  5.9575533364365038e-02  5.8903426519224068e-02  5.8228720831188990e-02  5.7552545461631736e-02  5.6875954237880735e-02
  5.6199927853739069e-02  5.5525376070002602e-02  5.4853139914978116e-02  5.4183993885001482e-02  5.3518648144955799e-02
  5.2857750728789503e-02  5.2201889740034563e-02  5.1551595552324581e-02  5.0907343009912967e-02  5.0269553628191063e-02
  4.9638597794206304e-02  4.9014796967180321e-02  4.8398425879027165e-02  4.7789714734871369e-02  4.7188851413566130e-02
  4.6595983668211452e-02  4.6011221326672284e-02  4.5434638492096675e-02  4.4866275743433909e-02  4.4306142335952620e-02
  4.3754218401759019e-02  4.3210457150314935e-02  4.2674787068956034e-02  4.2147114123409934e-02  4.1627323958314352e-02
  4.1115284097735239e-02  4.0610846145684942e-02  4.0113847986640347e-02  3.9624115986060998e-02  3.9141467190907289e-02
  3.8665711530158541e-02  3.8196654015331205e-02  3.7734096940996970e-02  3.7277842085300938e-02  3.6827692910479735e-02
  3.6383456763379680e-02  3.5944947075935992e-02  3.5511985494032193e-02  3.5084403160942919e-02  3.4662040747449697e-02
  3.4244748201982950e-02  3.3832384496961306e-02  3.3424817375130998e-02  3.3021923095905181e-02  3.2623586181703301e-02
  3.2229699164290464e-02  3.1840162331116736e-02  3.1454883471656564e-02  3.1073777623748054e-02  3.0696766819932397e-02
  3.0323779833793165e-02  2.9954751926295688e-02  2.9589624592126409e-02  2.9228345306032220e-02  2.8870867269159828e-02
  2.8517149155395109e-02  2.8167154857702440e-02  2.7820853234464076e-02  2.7478217855819491e-02  2.7139226750004720e-02
  2.6803862149691743e-02  2.6472110238327788e-02  2.6143960896474739e-02  2.5819407448148441e-02  2.5498446407158079e-02
  2.5181077223445526e-02  2.4867302029424682e-02  2.4557125386320849e-02  2.4250554030510053e-02  2.3947596619858437e-02
  2.3648263480061573e-02  2.3352566350983834e-02  2.3060518132997747e-02  2.2772132633323332e-02  2.2487424312367481e-02
  2.2206408030063275e-02  2.1929098792209369e-02  2.1655511496809311e-02  2.1385660680410930e-02  2.1119560264445669e-02
  2.0857223301567925e-02  2.0598661721994427e-02  2.0343886079843582e-02  2.0092905299474797e-02  1.9845726421827879e-02
  1.9602354350762363e-02  1.9362791599396845e-02  1.9127038036448378e-02  1.8895090632571783e-02  1.8666943206699035e-02
  1.8442586172950699e-02  1.8222006329670439e-02  1.8005186837026725e-02  1.7792107321810371e-02  1.7582743993007480e-02
  1.7377069757378259e-02  1.7175054335035828e-02  1.6976664375025045e-02  1.6781863570901303e-02  1.6590612776309348e-02
  1.6402870120562102e-02  1.6218591124219459e-02  1.6037728814667106e-02  1.5860233841695340e-02  1.5686054593077869e-02
  1.5515137310150638e-02  1.5347426203390633e-02  1.5182863567994696e-02  1.5021389899458334e-02  1.4862944009154538e-02
  1.4707463139912594e-02  1.4554883081596894e-02  1.4405138286685742e-02  1.4258161985850185e-02  1.4113886303532809e-02
  1.3972242373526553e-02  1.3833160454553531e-02  1.3696570045843837e-02  1.3562400002714362e-02  1.3430578652147602e-02
  1.3301033908370473e-02  1.3173693388433126e-02  1.3048484527787757e-02  1.2925334695867423e-02  1.2804171311664843e-02
  1.2684921959311226e-02  1.2567514503655078e-02  1.2451877205841009e-02  1.2337938838888556e-02  1.2225628803270987e-02
  1.2114877242494115e-02  1.2005615158675115e-02  1.1897774528121336e-02  1.1791288416909105e-02  1.1686091096462551e-02
  1.1582118159132413e-02  1.1479306633774850e-02  1.1377595101330261e-02  1.1276923810402087e-02  1.1177234792835632e-02
  1.1078471979296877e-02  1.0980581314851280e-02  1.0883510874542609e-02  1.0787210978971650e-02  1.0691634307238381e-02
  1.0596735964593158e-02  1.0502473462458119e-02  1.0408806672322789e-02  1.0315697779013901e-02  1.0223111233965233e-02
  1.0131013708487418e-02  1.0039374047037782e-02  9.9481632204901586e-03  9.8573542794047220e-03  9.7669223072978061e-03
  9.6768443739117336e-03  9.5870994884846347e-03  9.4976685530202797e-03  9.4085343155578989e-03  9.3196813234420074e-03
  9.2310958765922345e-03  9.1427659807731387e-03  9.0546813008640474e-03  8.9668331141288665e-03  8.8792142634859170e-03
  8.7918191107777526e-03  8.7046434900409850e-03  8.6176846607761166e-03  8.5309412612173535e-03  8.4444132616024407e-03
  8.3581019174424776e-03  8.2720097227917538e-03  8.1861403635175613e-03  8.1004986705700329e-03  8.0150905732519553e-03
  7.9299230524886022e-03  7.8450040940975501e-03  7.7603426420585148e-03  7.6759485517831679e-03  7.5918325433849626e-03
  7.5080061549489627e-03  7.4244816958016630e-03  7.3412721997808154e-03  7.2583913785052552e-03  7.1758535746447244e-03
  7.0936737151896974e-03  7.0118672647212048e-03  6.9304501786806583e-03  6.8494388566396796e-03  6.7688500955699182e-03
  6.6887010431128813e-03  6.6090091508497571e-03  6.5297921275712404e-03  6.4510678925473550e-03  6.3728545287972827e-03
  6.2951702363591849e-03  6.2180332855600266e-03  6.1414619703007052e-03  6.0654745636554265e-03  5.9900892874938157e-03
  5.9153242944058734e-03  5.8411976510991280e-03  5.7677273217994112e-03  5.6949311516516403e-03  5.6228268501205981e-03
  5.5514319743917087e-03  5.4807639127718178e-03  5.4108398680899729e-03  5.3416768410982016e-03  5.2732916138722927e-03
  5.2057007332125703e-03  5.1389204940446784e-03  5.0729669228203591e-03  5.0078557609182272e-03  4.9436024480445555e-03
  4.8802221056340502e-03  4.8177295202506288e-03  4.7561391269882059e-03  4.6954649928714638e-03  4.6357208002566364e-03
  4.5769198302322905e-03  4.5190749460200987e-03  4.4621985763756231e-03  4.4063026989890931e-03  4.3513988238861835e-03
  4.2974979768287984e-03  4.2446106827158424e-03  4.1927469489840066e-03  4.1419162490085454e-03  4.0921275055040528e-03
  4.0433890739252475e-03  3.9957087258677476e-03  3.9490936324688489e-03  3.9035503478083086e-03  3.8590847923091211e-03
  3.8157022361382967e-03  3.7734072826076438e-03  3.7322038515745439e-03  3.6920951628427357e-03  3.6530837195630898e-03
  3.6151712916343897e-03  3.5783588991041108e-03  3.5426467955692008e-03  3.5080344515768555e-03  3.4745205380253010e-03
  3.4421029095645728e-03  3.4107785879972925e-03  3.3805437456794507e-03  3.3513936889211803e-03  3.3233228413875418e-03
  3.2963247274993002e-03  3.2703919562009406e-03  3.2455162142768644e-03  3.2216882839052764e-03  3.1988980697602448e-03
  3.1771346264810041e-03  3.1563861861412554e-03  3.1366401857184671e-03  3.1178832945631778e-03  3.1001014418682946e-03
  3.0832798441383976e-03  3.0674030326590376e-03  3.0524548809660393e-03  3.0384186323148018e-03  3.0252769271495996e-03
  3.0130118305728842e-03  3.0016048598145847e-03  2.9910370117014087e-03  2.9812887901261432e-03  2.9723402335169570e-03
  2.9641709423067009e-03  2.9567601064022083e-03  2.9500865326535976e-03  2.9441286723235712e-03  2.9388646485567194e-03
  2.9342722838488189e-03  2.9303291275161354e-03  2.9270124831647245e-03  2.9242994361597320e-03  2.9221668810946962e-03
  2.9205915492608475e-03  2.9195500361164110e-03  2.9190188287559070e-03  2.9189743333794512e-03  2.9193929027620572e-03
  2.9202508637229375e-03  2.9215245445948020e-03  2.9231903026931639e-03  2.9252245517856364e-03  2.9276037895612354e-03
  2.9303046250996811e-03  2.9333038063406990e-03  2.9365782475533199e-03  2.9401050568051814e-03  2.9438615634318297e-03
  2.9478253455060208e-03  2.9519742573070203e-03  2.9562864567899056e-03  2.9607404330548666e-03  2.9653150338165061e-03
  2.9699894928731430e-03  2.9747434575761113e-03  2.9795570162990609e-03  2.9844107259072617e-03  2.9892856392229983e-03
  2.9941633309083565e-03  2.9990259101223150e-03  3.0038560181032846e-03  3.0086368232637938e-03  3.0133520162687285e-03
  3.0179858051135721e-03  3.0225229102026452e-03  3.0269485594273454e-03  3.0312484832443879e-03  3.0354089097540445e-03
  3.0394165597783839e-03  3.0432586419395120e-03  3.0469228477378102e-03  3.0503973466301775e-03  3.0536707811082693e-03
  3.0567322617767365e-03  3.0595713624314669e-03  3.0621781151378238e-03  3.0645430053088873e-03  3.0666569667836922e-03
  3.0685113769054698e-03  3.0700980515998870e-03  3.0714092404532860e-03  3.0724376217909242e-03  3.0731762977552150e-03
  3.0736187893839659e-03  3.0737590316886206e-03  3.0735913687324969e-03  3.0731105487090279e-03  3.0723117190200010e-03
  3.0711904213537988e-03  3.0697425867636375e-03  3.0679645307458087e-03  3.0658529483179177e-03  3.0634049090971240e-03
  3.0606178523783808e-03  3.0574895822126765e-03  3.0540182624852713e-03  3.0502024119939413e-03  3.0460408995272143e-03
  3.0415329389426129e-03  3.0366780842448924e-03  3.0314762246642815e-03  3.0259275797347223e-03  3.0200326943721090e-03
  3.0137924339525301e-03  3.0072079793905062e-03  3.0002808222172306e-03  2.9930127596588087e-03  2.9854058897144991e-03
  2.9774626062349526e-03  2.9691855940004522e-03  2.9605778237991524e-03  2.9516425474876186e-03  2.9423832923122948e-03
  2.9328038527520403e-03  2.9229082810794350e-03  2.9127008778475050e-03  2.9021861823764401e-03  2.8913689632403170e-03
  2.8802542087538177e-03  2.8688471174589513e-03  2.8571530886117745e-03  2.8451777126691112e-03  2.8329267617752734e-03
  2.8204061802487822e-03  2.8076220750690873e-03  2.7945807063632891e-03  2.7812884778928570e-03  2.7677519275403515e-03
  2.7539777177961449e-03  2.7399726262451398e-03  2.7257435360534916e-03  2.7112974264553295e-03  2.6966413632394737e-03
  2.6817824892361596e-03  2.6667280148037560e-03  2.6514852083154867e-03  2.6360613866461503e-03  2.6204639056588413e-03
  2.6047001506916698e-03  2.5887775270444827e-03  2.5727034504655849e-03  2.5564853376384570e-03  2.5401305966684796e-03
  2.5236466175696504e-03  2.5070407627513069e-03  2.4903203575048463e-03  2.4734926804904456e-03  2.4565649542237821e-03
  2.4395443355627543e-03  2.4224379061942025e-03  2.4052526631206284e-03  2.3879955091469169e-03  2.3706732433670559e-03
  2.3532925516508560e-03  2.3358599971306728e-03  2.3183820106881256e-03  2.3008648814408198e-03  2.2833147472290645e-03
  2.2657375851025965e-03  2.2481392018072980e-03  2.2305252242719189e-03  2.2129010900947960e-03  2.1952720380305746e-03
  2.1776430984769275e-03  2.1600190839614879e-03  2.1424045800157543e-03  2.1248039406169504e-03  2.1072212904018560e-03
  2.0896605283933912e-03  2.0721253317477484e-03  2.0546191595015228e-03  2.0371452563188426e-03  2.0197066562385015e-03
  2.0023061864210901e-03  1.9849464708961233e-03  1.9676299343091772e-03  1.9503588056690141e-03  1.9331351220947179e-03
  1.9159607325628233e-03  1.8988373016544469e-03  1.8817663133024185e-03  1.8647490745384121e-03  1.8477867192400769e-03
  1.8308802118781687e-03  1.8140303512636795e-03  1.7972377742949712e-03  1.7805029597049034e-03  1.7638262318079674e-03
  1.7472077642474153e-03  1.7306475837423918e-03  1.7141455738350646e-03  1.6977014786377568e-03  1.6813149065800764e-03
  1.6649853341560482e-03  1.6487121096712448e-03  1.6324944569899170e-03  1.6163314792821256e-03  1.6002221627708722e-03
  1.5841653804792297e-03  1.5681598959774747e-03  1.5522043671302166e-03  1.5362973498435298e-03  1.5204373018120857e-03
  1.5046225862662816e-03  1.4888514757193726e-03  1.4731221557146034e-03  1.4574327285723390e-03  1.4417812171371943e-03
  1.4261655685251673e-03  1.4105836578707691e-03  1.3950332920741541e-03  1.3795122135482531e-03  1.3640181039659021e-03
  1.3485485880069753e-03  1.3331012371055144e-03  1.3176735731968607e-03  1.3022630724647865e-03  1.2868671690886243e-03
  1.2714832589983676e-03  1.2561087042163841e-03  1.2407408398251699e-03  1.2253769827064657e-03  1.2100144404304349e-03
  1.1946505201449230e-03  1.1792825374647171e-03  1.1639078253608054e-03  1.1485237430496373e-03  1.1331276848823824e-03
  1.1177170892341902e-03  1.1022894473934500e-03  1.0868423124510498e-03  1.0713733081896366e-03  1.0558801379728750e-03
  1.0403605936347080e-03  1.0248125643686156e-03  1.0092340456168748e-03  9.9362314795981856e-04  9.7797810600509685e-04
  9.6229728727693421e-04  9.4657920110539071e-04  9.3082250751562131e-04  9.1502602611713449e-04  8.9918874499305356e-04
  8.8330982958937417e-04  8.6738863160422570e-04  8.5142469787712950e-04  8.3541777927825930e-04  8.1936783959770017e-04
  8.0327506443470843e-04  7.8713987008697129e-04  7.7096291243986610e-04  7.5474509585571998e-04  7.3848758206306964e-04
  7.2219179904592064e-04  7.0585944993300717e-04  6.8949252188705147e-04  6.7309329499402339e-04  6.5666435115240018e-04
  6.4020858296242548e-04  6.2372920261536964e-04  6.0722975078278884e-04  5.9071410550578455e-04  5.7418649108426350e-04
  5.5765148696619680e-04  5.4111403663687971e-04  5.2457945650819144e-04  5.0805344480785413e-04  4.9154209046869306e-04
  4.7505188201789567e-04  4.5858971646627121e-04  4.4216290819751086e-04  4.2577919785742786e-04  4.0944676061999981e-04
  3.9317420374819511e-04  3.7697054344212433e-04  3.6084517551196059e-04  3.4480784590294424e-04  3.2886862122038802e-04
  3.1303785925468179e-04  2.9732617950629795e-04  2.8174443371079580e-04  2.6630367636382716e-04  2.5101513524614083e-04
  2.3589018194858792e-04  2.2094030239712661e-04  2.0617706737782729e-04  1.9161210306187733e-04  1.7725706153058634e-04
  1.6312359130039091e-04  1.4922330784785965e-04  1.3556776413469818e-04  1.2216842113275429e-04  1.0903661834902250e-04
  9.6183544350649474e-05  8.3620207289938702e-05  7.1357405429355535e-05  5.9405697666532460e-05  4.7775374059273528e-05
  3.6476426350559859e-05  2.5518518493554225e-05  1.4910957176606345e-05  4.6626623482575705e-06 -5.2178622577538731e-06
 -1.4722558597487980e-05 -2.3843843791798215e-05 -3.2574639601326279e-05 -4.0908401901497144e-05 -4.8839150157514255e-05
 -5.6361496899354181e-05 -6.3470677196762195e-05 -7.0162578134246717e-05 -7.6433768286074996e-05 -8.2281527191267279e-05
 -8.7703874828592608e-05 -9.2699601091563528e-05 -9.7268295263430802e-05 -1.0141037549217909e-04 -1.0512711826552156e-04
 -1.0842068788589492e-04 -1.1129416594545444e-04 -1.1375158080106912e-04 -1.1579793704931662e-04 -1.1743924500147825e-04
 -1.1868255015853407e-04 -1.1953596268615766e-04 -1.2000868683902743e-04 -1.2011104271778626e-04 -1.1985444156752584e-04
 -1.1925132031582600e-04 -1.1831507123331340e-04 -1.1705997158219243e-04 -1.1550111326477610e-04 -1.1365433247201694e-04
 -1.1153613933203792e-04 -1.0916364755866333e-04 -1.0655450409994974e-04 -1.0372681878671683e-04 -1.0069909398107831e-04
 -9.7490154224972870e-05 -9.4119075888695052e-05 -9.0605116819426112e-05 -8.6967645989765013e-05 -8.3226073146259251e-05
 -7.9399778457935798e-05 -7.5508042164832020e-05 -7.1569974226526469e-05 -6.7604443970669959e-05 -6.3630009741516363e-05
 -5.9664848548453511e-05 -5.5726685714534120e-05 -5.1832724525006736e-05 -4.7999575875846506e-05 -4.4243187922286296e-05
 -4.0578775727347378e-05 -3.7020750910370432e-05 -3.3582651295546498e-05 -3.0277070560447765e-05 -2.7115587884558539e-05
 -2.4108697597806188e-05 -2.1265738829091962e-05 -1.8594825154821904e-05 -1.6102774247437839e-05 -1.3795037523948195e-05
 -1.1675629794458933e-05 -9.7470589107043855e-06 -8.0102554145783622e-06 -6.4645021866647682e-06 -5.1073640947687154e-06
 -3.9346176424474069e-06 -2.9401806175408980e-06 -2.1160417407031838e-06 -1.4521903139329739e-06 -9.3654586910464383e-07
 -5.5488781649917285e-07 -2.9078509333486501e-07 -1.2552581229857143e-07 -3.8046910076384175e-08 -4.8637958844385647e-09
  0.0000000000000000e+00
   47 107.90  0 dummy #Atomic_number  atomic_mass (g/cm^3) lattice_constant lattice_type
 -2.7879188654832432e-01 -2.9641800707930072e-01 -3.1396005122850112e-01 -3.3141802590632397e-01 -3.4879194259023499e-01
 -3.6608181729059752e-01 -3.8328767051650225e-01 -4.0040952724159773e-01 -4.1744741686992010e-01 -4.3440137320172345e-01
 -4.5127143439930972e-01 -4.6805764295285890e-01 -4.8476004564625913e-01 -5.0137869352293674e-01 -5.1791364185168620e-01
 -5.3436495009250062e-01 -5.5073268186240154e-01 -5.6701690490126877e-01 -5.8321769103767140e-01 -5.9933511615469670e-01
 -6.1536926015578097e-01 -6.3132020693053947e-01 -6.4718804432059673e-01 -6.6297286408541600e-01 -6.7867476186812992e-01
 -6.9429383716137061e-01 -7.0983019327309926e-01 -7.2528393729243712e-01 -7.4065518005549413e-01 -7.5594403611120087e-01
 -7.7115062368713705e-01 -7.8627506465536257e-01 -8.0131748449824691e-01 -8.1627801227430019e-01 -8.3115678058400233e-01
 -8.4595392553563331e-01 -8.6066958671110372e-01 -8.7530390713178441e-01 -8.8985703322433696e-01 -9.0432911478654332e-01
 -9.1872030495313628e-01 -9.3303076016162934e-01 -9.4726064011814681e-01 -9.6141010776325408e-01 -9.7547932923778780e-01
 -9.8946847384868530e-01 -1.0033777140348155e+00 -1.0172072253328086e+00 -1.0309571863428864e+00 -1.0446277786946916e+00
 -1.0582191870131195e+00 -1.0717315988841460e+00 -1.0851652048206599e+00 -1.0985201982282913e+00 -1.1117967753712421e+00
 -1.1249951353381167e+00 -1.1381154800077515e+00 -1.1511580140150453e+00 -1.1641229447167887e+00 -1.1770104821574956e+00
 -1.1898208390352318e+00 -1.2025542306674462e+00 -1.2152108749567998e+00 -1.2277909923569972e+00 -1.2402948058386154e+00
 -1.2527225408549343e+00 -1.2650744253077675e+00 -1.2773506895132907e+00 -1.2895515661678743e+00 -1.3016772903139109e+00
 -1.3137280993056470e+00 -1.3257042327750130e+00 -1.3376059325974523e+00 -1.3494334428577524e+00 -1.3611870098158745e+00
 -1.3728668818727841e+00 -1.3844733095362802e+00 -1.3960065453868260e+00 -1.4074668440433793e+00 -1.4188544621292216e+00
 -1.4301696582377894e+00 -1.4414126928985032e+00 -1.4525838285425983e+00 -1.4636833294689544e+00 -1.4747114618099266e+00
 -1.4856684934971742e+00 -1.4965546942274917e+00 -1.5073703354286383e+00 -1.5181156902251689e+00 -1.5287910334042631e+00
 -1.5393966413815563e+00 -1.5499327921669690e+00 -1.5603997653305368e+00 -1.5707978419682418e+00 -1.5811273046678409e+00
 -1.5913884374746974e+00 -1.6015815258576103e+00 -1.6117068566746440e+00 -1.6217647181389598e+00 -1.6317553997846448e+00
 -1.6416791924325418e+00 -1.6515363881560809e+00 -1.6613272802471077e+00 -1.6710521631817155e+00 -1.6807113325860725e+00
 -1.6903050852022548e+00 -1.6998337188540749e+00 -1.7092975324129125e+00 -1.7186968257635440e+00 -1.7280318997699728e+00
 -1.7373030562412595e+00 -1.7465105978973521e+00 -1.7556548283349156e+00 -1.7647360519931630e+00 -1.7737545741196843e+00
 -1.7827107007362770e+00 -1.7916047386047773e+00 -1.8004369951928878e+00 -1.8092077786400098e+00 -1.8179173977230729e+00
 -1.8265661618223639e+00 -1.8351543808873585e+00 -1.8436823654025498e+00 -1.8521504263532809e+00 -1.8605588751915709e+00
 -1.8689080238019495e+00 -1.8771981844672845e+00 -1.8854296698346120e+00 -1.8936027928809671e+00 -1.9017178668792138e+00
 -1.9097752053638757e+00 -1.9177751220969643e+00 -1.9257179310338108e+00 -1.9336039462888965e+00 -1.9414334821016808e+00
 -1.9492068528024336e+00 -1.9569243727780630e+00 -1.9645863564379487e+00 -1.9721931181797683e+00 -1.9797449723553302e+00
 -1.9872422332364026e+00 -1.9946852149805434e+00 -2.0020742315969304e+00 -2.0094095969121932e+00 -2.0166916245362394e+00
 -2.0239206278280886e+00 -2.0310969198617004e+00 -2.0382208133918041e+00 -2.0452926208197315e+00 -2.0523126541592434e+00
 -2.0592812250023629e+00 -2.0661986444852021e+00 -2.0730652232537965e+00 -2.0798812714299304e+00 -2.0866470985769716e+00
 -2.0933630136656975e+00 -2.1000293250401274e+00 -2.1066463403833522e+00 -2.1132143666833638e+00 -2.1197337101988873e+00
 -2.1262046764252078e+00 -2.1326275700600030e+00 -2.1390026949691725e+00 -2.1453303541526689e+00 -2.1516108497103250e+00
 -2.1578444828076866e+00 -2.1640315536418431e+00 -2.1701723614072548e+00 -2.1762672042615847e+00 -2.1823163792915290e+00
 -2.1883201824786456e+00 -2.1942789086651868e+00 -2.2001928515199261e+00 -2.2060623035039910e+00 -2.2118875558366913e+00
 -2.2176688984613513e+00 -2.2234066200111364e+00 -2.2291010077748874e+00 -2.2347523476629467e+00 -2.2403609241729923e+00
 -2.2459270203558637e+00 -2.2514509177813959e+00 -2.2569328965042459e+00 -2.2623732350297265e+00 -2.2677722102796336e+00
 -2.2731300975580755e+00 -2.2784471705173086e+00 -2.2837237011235585e+00 -2.2889599596228614e+00 -2.2941562145068808e+00
 -2.2993127324787501e+00 -2.3044297784188954e+00 -2.3095076153508680e+00 -2.3145465044071729e+00 -2.3195467047951013e+00
 -2.3245084737625588e+00 -2.3294320665638955e+00 -2.3343177364257386e+00 -2.3391657345128181e+00 -2.3439763098938009e+00
 -2.3487497095071186e+00 -2.3534861781271808e+00 -2.3581859583404743e+00 -2.3628492905467890e+00 -2.3674764129703272e+00
 -2.3720675616711984e+00 -2.3766229705569146e+00 -2.3811428713938829e+00 -2.3856274938189008e+00 -2.3900770653506478e+00
 -2.3944918114011826e+00 -2.3988719552874342e+00 -2.4032177182426988e+00 -2.4075293194281304e+00 -2.4118069759442373e+00
 -2.4160509028423758e+00 -2.4202613131362436e+00 -2.4244384178133731e+00 -2.4285824258466269e+00 -2.4326935442056916e+00
 -2.4367719778685704e+00 -2.4408179298330790e+00 -2.4448316011283375e+00 -2.4488131908262663e+00 -2.4527628960530787e+00
 -2.4566809120007771e+00 -2.4605674319386428e+00 -2.4644226472247350e+00 -2.4682467473173810e+00 -2.4720399197866723e+00
 -2.4758023503259565e+00 -2.4795342227633350e+00 -2.4832357190731531e+00 -2.4869070193874951e+00 -2.4905483020076802e+00
 -2.4941597434157545e+00 -2.4977415182859843e+00 -2.5012937994963536e+00 -2.5048167581400542e+00 -2.5083105635369813e+00
 -2.5117753832452290e+00 -2.5152113830725806e+00 -2.5186187270880072e+00 -2.5219975776331571e+00 -2.5253480953338534e+00
 -2.5286704391115862e+00 -2.5319647661950073e+00 -2.5352312321314225e+00 -2.5384699907982893e+00 -2.5416811944147066e+00
 -2.5448649935529111e+00 -2.5480215371497716e+00 -2.5511509725182817e+00 -2.5542534453590537e+00 -2.5573290997718150e+00
 -2.5603780782668983e+00 -2.5634005217767393e+00 -2.5663965696673681e+00 -2.5693663597499037e+00 -2.5723100282920499e+00
 -2.5752277100295862e+00 -2.5781195381778645e+00 -2.5809856444433015e+00 -2.5838261590348734e+00 -2.5866412106756091e+00
 -2.5894309266140860e+00 -2.5921954326359216e+00 -2.5949348530752689e+00 -2.5976493108263106e+00 -2.6003389273547519e+00
 -2.6030038227093164e+00 -2.6056441155332379e+00 -2.6082599230757562e+00 -2.6108513612036091e+00 -2.6134185444125286e+00
 -2.6159615858387344e+00 -2.6184805972704268e+00 -2.6209756891592804e+00 -2.6234469706319401e+00 -2.6258945495015142e+00
 -2.6283185322790672e+00 -2.6307190241851162e+00 -2.6330961291611215e+00 -2.6354499498809840e+00 -2.6377805877625380e+00
 -2.6400881429790442e+00 -2.6423727144706839e+00 -2.6446343999560549e+00 -2.6468732959436632e+00 -2.6490894977434190e+00
 -2.6512830994781278e+00 -2.6534541940949881e+00 -2.6556028733770822e+00 -2.6577292279548725e+00 -2.6598333473176941e+00
 -2.6619153198252485e+00 -2.6639752327190993e+00 -2.6660131721341651e+00 -2.6680292231102127e+00 -2.6700234696033527e+00
 -2.6719959944975331e+00 -2.6739468796160324e+00 -2.6758762057329539e+00 -2.6777840525847205e+00 -2.6796704988815683e+00
 -2.6815356223190396e+00 -2.6833794995894786e+00 -2.6852022063935239e+00 -2.6870038174516040e+00 -2.6887844065154289e+00
 -2.6905440463794874e+00 -2.6922828088925375e+00 -2.6940007649691040e+00 -2.6956979846009697e+00 -2.6973745368686703e+00
 -2.6990304899529889e+00 -2.7006659111464488e+00 -2.7022808668648097e+00 -2.7038754226585593e+00 -2.7054496432244077e+00
 -2.7070035924167835e+00 -2.7085373332593248e+00 -2.7100509279563751e+00 -2.7115444379044780e+00 -2.7130179237038679e+00
 -2.7144714451699676e+00 -2.7159050613448805e+00 -2.7173188305088853e+00 -2.7187128101919282e+00 -2.7200870571851201e+00
 -2.7214416275522275e+00 -2.7227765766411687e+00 -2.7240919590955062e+00 -2.7253878288659417e+00 -2.7266642392218094e+00
 -2.7279212427625712e+00 -2.7291588914293090e+00 -2.7303772365162198e+00 -2.7315763286821100e+00 -2.7327562179618883e+00
 -2.7339169537780599e+00 -2.7350585849522213e+00 -2.7361811597165540e+00 -2.7372847257253183e+00 -2.7383693300663472e+00
 -2.7394350192725399e+00 -2.7404818393333570e+00 -2.7415098357063146e+00 -2.7425190533284760e+00 -2.7435095366279483e+00
 -2.7444813295353754e+00 -2.7454344754954318e+00 -2.7463690174783171e+00 -2.7472849979912484e+00 -2.7481824590899571e+00
 -2.7490614423901807e+00 -2.7499219890791569e+00 -2.7507641399271199e+00 -2.7515879352987902e+00 -2.7523934151648732e+00
 -2.7531806191135493e+00 -2.7539495863619710e+00 -2.7547003557677550e+00 -2.7554329658404764e+00 -2.7561474547531630e+00
 -2.7568438603537899e+00 -2.7575222201767722e+00 -2.7581825714544603e+00 -2.7588249511286334e+00 -2.7594493958619921e+00
 -2.7600559420496547e+00 -2.7606446258306505e+00 -2.7612154830994124e+00 -2.7617685495172730e+00 -2.7623038605239567e+00
 -2.7628214513490748e+00 -2.7633213570236190e+00 -2.7638036123914569e+00 -2.7642682521208228e+00 -2.7647153107158151e+00
 -2.7651448225278883e+00 -2.7655568217673467e+00 -2.7659513425148412e+00 -2.7663284187328587e+00 -2.7666880842772210e+00
 -2.7670303729085757e+00 -2.7673553183038897e+00 -2.7676629540679465e+00 -2.7679533137448367e+00 -2.7682264308294542e+00
 -2.7684823387789894e+00 -2.7687210710244226e+00 -2.7689426609820198e+00 -2.7691471420648242e+00 -2.7693345476941524e+00
 -2.7695049113110874e+00 -2.7696582663879723e+00 -2.7697946464399057e+00 -2.7699140850362332e+00 -2.7700166158120441e+00
 -2.7701022724796642e+00 -2.7701710888400299e+00 -2.7702230987909759e+00 -2.7702583363276787e+00 -2.7702768355400091e+00
 -2.7702786306097704e+00 -2.7702637558079322e+00 -2.7702322454918669e+00 -2.7701841341025846e+00 -2.7701194561619693e+00
 -2.7700382462700150e+00 -2.7699405391020595e+00 -2.7698263694060219e+00 -2.7696957719996367e+00 -2.7695487817676914e+00
 -2.7693854336592594e+00 -2.7692057626849378e+00 -2.7690098039140825e+00 -2.7687975924720427e+00 -2.7685691635373977e+00
 -2.7683245523391933e+00 -2.7680637941541741e+00 -2.7677869243040236e+00 -2.7674939781525953e+00 -2.7671849911031519e+00
 -2.7668599985955993e+00 -2.7665190361037215e+00 -2.7661621391324189e+00 -2.7657893432149399e+00 -2.7654006839101202e+00
 -2.7649961967996162e+00 -2.7645759174851419e+00 -2.7641398815857037e+00 -2.7636881247348355e+00 -2.7632206825778360e+00
 -2.7627375907690035e+00 -2.7622388849688702e+00 -2.7617246008414393e+00 -2.7611947740514209e+00 -2.7606494402614667e+00
 -2.7600886351294052e+00 -2.7595123943054789e+00 -2.7589207534295777e+00 -2.7583137481284776e+00 -2.7576914140130726e+00
 -2.7570537866756135e+00 -2.7564009016869417e+00 -2.7557327945937247e+00 -2.7550495009156935e+00 -2.7543510561428759e+00
 -2.7536374957328338e+00 -2.7529088551078980e+00 -2.7521651696524039e+00 -2.7514064747099276e+00 -2.7506328055805205e+00
 -2.7498441975179464e+00 -2.7490406857269156e+00 -2.7482223053603207e+00 -2.7473890915164736e+00 -2.7465410792363394e+00
 -2.7456783035007737e+00 -2.7448007992277557e+00 -2.7439086012696268e+00 -2.7430017444103241e+00 -2.7420802633626167e+00
 -2.7411441927653413e+00 -2.7401935671806372e+00 -2.7392284210911844e+00 -2.7382487888974345e+00 -2.7372547049148515e+00
 -2.7362462033711430e+00 -2.7352233184035000e+00 -2.7341860840558279e+00 -2.7331345342759867e+00 -2.7320687029130224e+00
 -2.7309886237144063e+00 -2.7298943303232681e+00 -2.7287858562756320e+00 -2.7276632349976531e+00 -2.7265264998028531e+00
 -2.7253756838893537e+00 -2.7242108203371158e+00 -2.7230319421051714e+00 -2.7218390820288616e+00 -2.7206322728170726e+00
 -2.7194115470494684e+00 -2.7181769371737294e+00 -2.7169284755027872e+00 -2.7156661942120581e+00 -2.7143901253366827e+00
 -2.7131003007687577e+00 -2.7117967522545738e+00 -2.7104795113918505e+00 -2.7091486096269715e+00 -2.7078040782522206e+00
 -2.7064459484030174e+00 -2.7050742510551533e+00 -2.7036890170220262e+00 -2.7022902769518762e+00 -2.7008780613250218e+00
 -2.6994524004510954e+00 -2.6980133244662783e+00 -2.6965608633305371e+00 -2.6950950468248585e+00 -2.6936159045484862e+00
 -2.6921234659161550e+00 -2.6906177601553267e+00 -2.6890988163034271e+00 -2.6875666632050792e+00 -2.6860213295093414e+00
 -2.6844628436669411e+00 -2.6828912339275113e+00 -2.6813065283368265e+00 -2.6797087547340368e+00 -2.6780979407489047e+00
 -2.6764741137990415e+00 -2.6748373010871407e+00 -2.6731875295982150e+00 -2.6715248260968325e+00 -2.6698492171243506e+00
 -2.6681607289961526e+00 -2.6664593877988843e+00 -2.6647452193876866e+00 -2.6630182493834345e+00 -2.6612785031699713e+00
 -2.6595260058913430e+00 -2.6577607824490364e+00 -2.6559828574992119e+00 -2.6541922554499413e+00 -2.6523890004584434e+00
 -2.6505731164283173e+00 -2.6487446270067805e+00 -2.6469035555819040e+00 -2.6450499252798458e+00 -2.6431837589620901e+00
 -2.6413050792226795e+00 -2.6394139083854533e+00 -2.6375102685012810e+00 -2.6355941813452990e+00 -2.6336656684141460e+00
 -2.6317247509231989e+00 -2.6297714498038074e+00 -2.6278057857005312e+00 -2.6258277789683744e+00 -2.6238374496700212e+00
 -2.6218348175730712e+00 -2.6198199021472766e+00 -2.6177927225617768e+00 -2.6157532976823323e+00 -2.6137016460685638e+00
 -2.6116377859711850e+00 -2.6095617353292395e+00 -2.6074735117673358e+00 -2.6053731325928831e+00 -2.6032606147933270e+00
 -2.6011359750333853e+00 -2.5989992296522835e+00 -2.5968503946609895e+00 -2.5946894857394507e+00 -2.5925165182338290e+00
 -2.5903315071537358e+00 -2.5881344671694677e+00 -2.5859254126092441e+00 -2.5837043574564391e+00 -2.5814713153468207e+00
 -2.5792262995657844e+00 -2.5769693230455899e+00 -2.5747003983625949e+00 -2.5724195377344929e+00 -2.5701267530175471e+00
 -2.5678220557038283e+00 -2.5655054569184466e+00 -2.5631769674167915e+00 -2.5608365975817637e+00 -2.5584843574210132e+00
 -2.5561202565641743e+00 -2.5537443042601002e+00 -2.5513565093741000e+00 -2.5489568803851732e+00 -2.5465454253832456e+00
 -2.5441221520664064e+00 -2.5416870677381409e+00 -2.5392401793045685e+00 -2.5367814932716772e+00 -2.5343110157425595e+00
 -2.5318287524146483e+00 -2.5293347085769522e+00 -2.5268288891072905e+00 -2.5243112984695300e+00 -2.5217819407108197e+00
 -2.5192408194588269e+00 -2.5166879379189733e+00 -2.5141232988716684e+00 -2.5115469046695473e+00 -2.5089587572347067e+00
 -2.5063588580559379e+00 -2.5037472081859651e+00 -2.5011238082386784e+00 -2.4984886583863726e+00 -2.4958417583569803e+00
 -2.4931831074313076e+00 -2.4905127044403690e+00 -2.4878305477652458e+00 -2.4851366353433688e+00 -2.4824309646773246e+00
 -2.4797135328437605e+00 -2.4769843365022930e+00 -2.4742433719044090e+00 -2.4714906349023757e+00 -2.4687261209581424e+00
 -2.4659498251522471e+00 -2.4631617421927241e+00 -2.4603618664240061e+00 -2.4575501918358311e+00 -2.4547267120721492e+00
 -2.4518914204400257e+00 -2.4490443099185475e+00 -2.4461853731677294e+00 -2.4433146025374191e+00 -2.4404319900762008e+00
 -2.4375375275403042e+00 -2.4346312064025071e+00 -2.4317130178610418e+00 -2.4287829528484997e+00 -2.4258410020407397e+00
 -2.4228871558657894e+00 -2.4199214045127539e+00 -2.4169437379407195e+00 -2.4139541458876601e+00 -2.4109526178793415e+00
 -2.4079391432382287e+00 -2.4049137110923895e+00 -2.4018763103844010e+00 -2.3988269298802547e+00 -2.3957655581782618e+00
 -2.3926921837179589e+00 -2.3896067947890138e+00 -2.3865093795401306e+00 -2.3833999259879550e+00 -2.3802784220259796e+00
 -2.3771448554334498e+00 -2.3739992138842689e+00 -2.3708414849559047e+00 -2.3676716561382936e+00 -2.3644897148427453e+00
 -2.3612956484108505e+00 -2.3580894441233857e+00 -2.3548710892092175e+00 -2.3516405708542090e+00 -2.3483978762101247e+00
 -2.3451429924035367e+00 -2.3418759065447299e+00 -2.3385966057366065e+00 -2.3353050770835933e+00 -2.3320013077005459e+00
 -2.3286852847216535e+00 -2.3253569953093458e+00 -2.3220164266631982e+00 -2.3186635660288371e+00 -2.3152984007068440e+00
 -2.3119209180616629e+00 -2.3085311055305051e+00 -2.3051289506322550e+00 -2.3017144409763737e+00 -2.2982875642718072e+00
 -2.2948483083358897e+00 -2.2913966611032506e+00 -2.2879326106347180e+00 -2.2844561451262271e+00 -2.2809672529177227e+00
 -2.2774659225020661e+00 -2.2739521425339406e+00 -2.2704259018387565e+00 -2.2668871894215568e+00 -2.2633359944759226e+00
 -2.2597723063928785e+00 -2.2561961147697986e+00 -2.2526074094193107e+00 -2.2490061803782027e+00 -2.2453924179163285e+00
 -2.2417661125455122e+00 -2.2381272550284548e+00 -2.2344758363876380e+00 -2.2308118479142314e+00 -2.2271352811769978e+00
 -2.2234461280311972e+00 -2.2197443806274935e+00 -2.2160300314208596e+00 -2.2123030731794828e+00 -2.2085634989936702e+00
 -2.2048113022847549e+00 -2.2010464768140006e+00 -2.1972690166915063e+00 -2.1934789163851138e+00 -2.1896761707293124e+00
 -2.1858607749341430e+00 -2.1820327245941051e+00 -2.1781920156970624e+00 -2.1743386446331461e+00 -2.1704726082036636e+00
 -2.1665939036300008e+00 -2.1627025285625296e+00 -2.1587984810895131e+00 -2.1548817597460102e+00 -2.1509523635227819e+00
 -2.1470102918751954e+00 -2.1430555447321318e+00 -2.1390881225048899e+00 -2.1351080260960922e+00 -2.1311152569085898e+00
 -2.1271098168543681e+00 -2.1230917083634533e+00 -2.1190609343928162e+00 -2.1150174984352788e+00 -2.1109614045284197e+00
 -2.1068926572634785e+00 -2.1028112617942623e+00 -2.0987172238460516e+00 -2.0946105497245036e+00 -2.0904912463245600e+00
 -2.0863593211393514e+00 -2.0822147822691033e+00 -2.0780576384300398e+00 -2.0738878989632918e+00 -2.0697055738438004e+00
 -2.0655106736892228e+00 -2.0613032097688384e+00 -2.0570831940124537e+00 -2.0528506390193071e+00 -2.0486055580669769e+00
 -2.0443479651202834e+00 -2.0400778748401960e+00 -2.0357953025927391e+00 -2.0315002644578972e+00 -2.0271927772385196e+00
 -2.0228728584692268e+00 -2.0185405264253156e+00 -2.0141958001316644e+00 -2.0098386993716386e+00 -2.0054692446959965e+00
 -2.0010874574317947e+00 -1.9966933596912935e+00 -1.9922869743808613e+00 -1.9878683252098821e+00 -1.9834374366996590e+00
 -1.9789943341923211e+00 -1.9745390438597277e+00 -1.9700715927123751e+00 -1.9655920086083007e+00 -1.9611003202619894e+00
 -1.9565965572532791e+00 -1.9520807500362651e+00 -1.9475529299482068e+00 -1.9430131292184325e+00 -1.9384613809772451e+00
 -1.9338977192648268e+00 -1.9293221790401462e+00 -1.9247347961898618e+00 -1.9201356075372289e+00 -1.9155246508510047e+00
 -1.9109019648543528e+00 -1.9062675892337506e+00 -1.9016215646478929e+00 -1.8969639327365979e+00 -1.8922947361297133e+00
 -1.8876140184560213e+00 -1.8829218243521435e+00 -1.8782181994714477e+00 -1.8735031904929516e+00 -1.8687768451302298e+00
 -1.8640392121403186e+00 -1.8592903413326212e+00 -1.8545302835778141e+00 -1.8497590908167512e+00 -1.8449768160693703e+00
 -1.8401835134435980e+00 -1.8353792381442560e+00 -1.8305640464819652e+00 -1.8257379958820523e+00 -1.8209011448934547e+00
 -1.8160535531976265e+00 -1.8111952816174424e+00 -1.8063263921261057e+00 -1.8014469478560518e+00 -1.7965570131078539e+00
 -1.7916566533591292e+00 -1.7867459352734436e+00 -1.7818249267092177e+00 -1.7768936967286322e+00 -1.7719523156065329e+00
 -1.7670008548393363e+00 -1.7620393871539357e+00 -1.7570679865166055e+00 -1.7520867281419084e+00 -1.7470956885015982e+00
 -1.7420949453335282e+00 -1.7370845776505544e+00 -1.7320646657494425e+00 -1.7270352912197720e+00 -1.7219965369528429e+00
 -1.7169484871505802e+00 -1.7118912273342195e+00 -1.7068248443472487e+00 -1.7017494263437785e+00 -1.6966650627711681e+00
 -1.6915718443524330e+00 -1.6864698630686505e+00 -1.6813592121413667e+00 -1.6762399860150026e+00 -1.6711122803392611e+00
 -1.6659761919515326e+00 -1.6608318188593025e+00 -1.6556792602225570e+00 -1.6505186163361891e+00 -1.6453499886124068e+00
 -1.6401734795631375e+00 -1.6349891927824358e+00 -1.6297972329288897e+00 -1.6245977057080265e+00 -1.6193907178547200e+00
 -1.6141763771155966e+00 -1.6089547922314420e+00 -1.6037260729196072e+00 -1.5984903298564153e+00 -1.5932476746595681e+00
 -1.5879982198705522e+00 -1.5827420789370459e+00 -1.5774793661953252e+00 -1.5722101968526705e+00 -1.5669346869697731e+00
 -1.5616529534431414e+00 -1.5563651139875081e+00 -1.5510712871182355e+00 -1.5457715921337232e+00 -1.5404661490978133e+00
 -1.5351550788221981e+00 -1.5298385028488259e+00 -1.5245165434323074e+00 -1.5191893235223222e+00 -1.5138569667460255e+00
 -1.5085195973904550e+00 -1.5031773403849360e+00 -1.4978303212834891e+00 -1.4924786662472362e+00 -1.4871225020268071e+00
 -1.4817619559447455e+00 -1.4763971558779163e+00 -1.4710282302399114e+00 -1.4656553079634564e+00 -1.4602785184828169e+00
 -1.4548979917162055e+00 -1.4495138580481874e+00 -1.4441262483120876e+00 -1.4387352937723970e+00 -1.4333411261071789e+00
 -1.4279438773904756e+00 -1.4225436800747151e+00 -1.4171406669731166e+00 -1.4117349712420981e+00 -1.4063267263636821e+00
 -1.4009160661279028e+00 -1.3955031246152116e+00 -1.3900880361788843e+00 -1.3846709354274274e+00 -1.3792519572069843e+00
 -1.3738312365837424e+00 -1.3684089088263385e+00 -1.3629851093882661e+00 -1.3575599738902824e+00 -1.3521336381028131e+00
 -1.3467062379283599e+00 -1.3412779093839071e+00 -1.3358487885833283e+00 -1.3304190117197916e+00 -1.3249887150481670e+00
 -1.3195580348674329e+00 -1.3141271075030825e+00 -1.3086960692895300e+00 -1.3032650565525170e+00 -1.2978342055915193e+00
 -1.2924036526621538e+00 -1.2869735339585833e+00 -1.2815439855959252e+00 -1.2761151435926559e+00 -1.2706871438530190e+00
 -1.2652601221494302e+00 -1.2598342141048851e+00 -1.2544095551753647e+00 -1.2489862806322429e+00 -1.2435645255446914e+00
 -1.2381444247620879e+00 -1.2327261128964213e+00 -1.2273097243046984e+00 -1.2218953930713514e+00 -1.2164832529906429e+00
 -1.2110734375490728e+00 -1.2056660799077858e+00 -1.2002613128849764e+00 -1.1948592689382962e+00 -1.1894600801472599e+00
 -1.1840638781956527e+00 -1.1786707943539354e+00 -1.1732809594616516e+00 -1.1678945039098347e+00 -1.1625115576234135e+00
 -1.1571322500436185e+00 -1.1517567101103896e+00 -1.1463850662447812e+00 -1.1410174463313694e+00 -1.1356539777006587e+00
 -1.1302947871114872e+00 -1.1249400007334351e+00 -1.1195897441292288e+00 -1.1142441422371494e+00 -1.1089033193534386e+00
 -1.1035673991147035e+00 -1.0982365044803259e+00 -1.0929107577148667e+00 -1.0875902803704729e+00 -1.0822751932692847e+00
 -1.0769656164858410e+00 -1.0716616693294860e+00 -1.0663634703267766e+00 -1.0610711372038879e+00 -1.0557847868690202e+00
 -1.0505045353948050e+00 -1.0452304980007114e+00 -1.0399627890354535e+00 -1.0347015219593962e+00 -1.0294468093269611e+00
 -1.0241987627690343e+00 -1.0189574929753715e+00 -1.0137231096770054e+00 -1.0084957216286523e+00 -1.0032754365911174e+00
 -9.9806236131370252e-01 -9.9285660151661126e-01 -9.8765826187335726e-01 -9.8246744599316893e-01 -9.7728425640339711e-01
 -9.7210879453192067e-01 -9.6694116068955360e-01 -9.6178145405245108e-01 -9.5662977264451599e-01 -9.5148621331980598e-01
 -9.4635087174493904e-01 -9.4122384238150048e-01 -9.3610521846844896e-01 -9.3099509200452391e-01 -9.2589355373065085e-01
 -9.2080069311234858e-01 -9.1571659832213526e-01 -9.1064135622193509e-01 -9.0557505234548508e-01 -9.0051777088074081e-01
 -8.9546959465228293e-01 -8.9043060510372474e-01 -8.8540088228011715e-01 -8.8038050481035623e-01 -8.7536954988958926e-01
 -8.7036809326162112e-01 -8.6537620920132086e-01 -8.6039397049702815e-01 -8.5542144843295997e-01 -8.5045871277161655e-01
 -8.4550583173618854e-01 -8.4056287199296265e-01 -8.3562989863372894e-01 -8.3070697515818648e-01 -8.2579416345635093e-01
 -8.2089152379095931e-01 -8.1599911477987830e-01 -8.1111699337850940e-01 -8.0624521486219636e-01 -8.0138383280863046e-01
 -7.9653289908025815e-01 -7.9169246380668667e-01 -7.8686257536709148e-01 -7.8204328037262127e-01 -7.7723462364880602e-01
 -7.7243664821796221e-01 -7.6764939528160003e-01 -7.6287290420282960e-01 -7.5810721248876700e-01 -7.5335235577294224e-01
 -7.4860836779770323e-01 -7.4387528039662487e-01 -7.3915312347691375e-01 -7.3444192500181504e-01 -7.2974171097301943e-01
 -7.2505250541306920e-01 -7.2037433034776466e-01 -7.1570720578857072e-01 -7.1105114971502359e-01 -7.0640617805713624e-01
 -7.0177230467780638e-01 -6.9714954135522156e-01 -6.9253789776526697e-01 -6.8793738146393069e-01 -6.8334799786971057e-01
 -6.7876975024602126e-01
  1.0000000000000000e+00  9.9999760073416455e-01  9.9999802142533367e-01  1.0000013220353126e+00  1.0000076584647948e+00
  1.0000173305228064e+00  1.0000308293188411e+00  1.0000488637654370e+00  1.0000723224320549e+00  1.0001022044611771e+00
  1.0001395488771090e+00  1.0001853641696861e+00  1.0002405723086689e+00  1.0003060074560213e+00  1.0003824463833229e+00
  1.0004706410657553e+00  1.0005713512137668e+00  1.0006853717511637e+00  1.0008135366934197e+00  1.0009567064951883e+00
  1.0011157539241200e+00  1.0012915499458626e+00  1.0014849512574038e+00  1.0016967973755246e+00  1.0019279158004928e+00
  1.0021791281009957e+00  1.0024512559989380e+00  1.0027451269339569e+00  1.0030615758495536e+00  1.0034014431295770e+00
  1.0037655719797154e+00  1.0041548058067540e+00  1.0045699857570174e+00  1.0050119497191548e+00  1.0054815331257601e+00
  1.0059795700792362e+00  1.0065068944803228e+00  1.0070643411095070e+00  1.0076527461522797e+00  1.0082729468998903e+00
  1.0089257812659205e+00  1.0096120873003587e+00  1.0103327027171269e+00  1.0110884646284968e+00  1.0118802096503008e+00
  1.0127087741090601e+00  1.0135749942512136e+00  1.0144797064486528e+00  1.0154237473289223e+00  1.0164079537417883e+00
  1.0174331626707800e+00  1.0185002111431010e+00  1.0196099361405093e+00  1.0207631745370349e+00  1.0219607631075522e+00
  1.0232035385653833e+00  1.0244923376010864e+00  1.0258279969210058e+00  1.0272113532764757e+00  1.0286432434629158e+00
  1.0301245043039533e+00  1.0316559726347208e+00  1.0332384852852108e+00  1.0348728790668071e+00  1.0365599907713701e+00
  1.0383006571778814e+00  1.0400957150596348e+00  1.0419460011914152e+00  1.0438523523556260e+00  1.0458156053432766e+00
  1.0478365969512378e+00  1.0499161639791459e+00  1.0520551432263074e+00  1.0542543714889463e+00  1.0565146855595102e+00
  1.0588369222277878e+00  1.0612219182822411e+00  1.0636705105113387e+00  1.0661835357047813e+00  1.0687618306539166e+00
  1.0714062321512963e+00  1.0741175769901006e+00  1.0768967019635662e+00  1.0797444438644443e+00  1.0826616394847717e+00
  1.0856491256160414e+00  1.0887077390494517e+00  1.0918383165761505e+00  1.0950416949874742e+00  1.0983187110750670e+00
  1.1016702016308173e+00  1.1050970034467520e+00  1.1085999533149302e+00  1.1121798880273390e+00  1.1158376443758347e+00
  1.1195740591521635e+00  1.1233899691480076e+00  1.1272862111550301e+00  1.1312636219649210e+00  1.1353230383694259e+00
  1.1394652971603392e+00  1.1436912351294850e+00  1.1480016890686977e+00  1.1523974957698027e+00  1.1568794920246022e+00
  1.1614485146248772e+00  1.1661054003623941e+00  1.1708509860289142e+00  1.1756861084162011e+00  1.1806116043160266e+00
  1.1856283105201721e+00  1.1907370638204249e+00  1.1959387010085765e+00  1.2012340588764201e+00  1.2066239742157465e+00
  1.2121092838183449e+00  1.2176908244760007e+00  1.2233694329804952e+00  1.2291459461236052e+00  1.2350212006971029e+00
  1.2409960334927577e+00  1.2470712813023412e+00  1.2532477809176314e+00  1.2595263691304173e+00  1.2659078827325014e+00
  1.2723931585156973e+00  1.2789830332718171e+00  1.2856783437926604e+00  1.2924799268700033e+00  1.2993886192955872e+00
  1.3064052578611272e+00  1.3135306793583355e+00  1.3207657205789507e+00  1.3281112183147645e+00  1.3355680093576459e+00
  1.3431369304995320e+00  1.3508188185323717e+00  1.3586145102480616e+00  1.3665248424383805e+00  1.3745506518949311e+00
  1.3826927754091498e+00  1.3909520497724299e+00  1.3993293117762715e+00  1.4078253982124314e+00  1.4164411458730661e+00
  1.4251773915507338e+00  1.4340349720381282e+00  1.4430147241277311e+00  1.4521174846114624e+00  1.4613440902803434e+00
  1.4706953779244314e+00  1.4801721843333895e+00  1.4897753462972909e+00  1.4995057006074293e+00  1.5093640840571145e+00
  1.5193513334419491e+00  1.5294682855586303e+00  1.5397157772030954e+00  1.5500946451686388e+00  1.5606057262440494e+00
  1.5712498572127098e+00  1.5820278748550567e+00  1.5929406159528436e+00  1.6039889172935167e+00  1.6151736156745633e+00
  1.6264955479061141e+00  1.6379555508060446e+00  1.6495544611902082e+00  1.6612931158622750e+00  1.6731723516035992e+00
  1.6851930051661799e+00  1.6973559132820453e+00  1.7096619126855153e+00  1.7221118401367979e+00  1.7347065324455586e+00
  1.7474468264891669e+00  1.7603335591956566e+00  1.7733675674933200e+00  1.7865496882559189e+00  1.7998807582479004e+00
  1.8133616140785114e+00  1.8269930922302611e+00  1.8407760291721258e+00  1.8547112614867407e+00  1.8687996259976700e+00
  1.8830419598822803e+00  1.8974391006310589e+00  1.9119918857958123e+00  1.9267011526945430e+00  1.9415677381158405e+00
  1.9565924780457764e+00  1.9717762077054999e+00  1.9871197621048520e+00  2.0026239767266230e+00  2.0182896882131032e+00
  2.0341177350187731e+00  2.0501089574474567e+00  2.0662641964518809e+00  2.0825842920490634e+00  2.0990700817258157e+00
  2.1157223988930798e+00  2.1325420725335076e+00  2.1495299297616688e+00  2.1666867994874108e+00  2.1840135161190473e+00
  2.2015109231995651e+00  2.2191798747808242e+00  2.2370212300715653e+00  2.2550358449886447e+00  2.2732245635564845e+00
  2.2915882093928408e+00  2.3101275813839832e+00  2.3288434646018170e+00  2.3477366497253835e+00  2.3668079530153716e+00
  2.3860582361858467e+00  2.4054884187050432e+00  2.4250994562041854e+00  2.4448922960248907e+00  2.4648678308298564e+00
  2.4850268523229904e+00  2.5053700182979863e+00  2.5258978936298959e+00  2.5466110514600953e+00  2.5675101809247463e+00
  2.5885961947913900e+00  2.6098703142819826e+00  2.6313339956517927e+00  2.6529887014535634e+00  2.6748356504149200e+00
  2.6968755673101401e+00  2.7191084707010913e+00  2.7415337926245380e+00  2.7641508910584531e+00  2.7869596301461854e+00
  2.8099609608803879e+00  2.8331574411998277e+00  2.8565530764669944e+00  2.8801521897039448e+00  2.9039580840640875e+00
  2.9279717027418415e+00  2.9521903784953265e+00  2.9766078885210647e+00  3.0012167613296277e+00  3.0260111777561782e+00
  3.0509898832893012e+00  3.0761590322019083e+00  3.1015337189860834e+00  3.1271367667308922e+00  3.1529966291521476e+00
  3.1791452681268000e+00  3.0452120632149691e+00  2.9148736227081131e+00  2.7881240391586029e+00  2.6649536007704846e+00
  2.5453489062138512e+00  2.4292929794392073e+00  2.3167653844918408e+00  2.2077423403261900e+00  2.1021968356202105e+00
  2.0000987435897484e+00  1.9014149368029034e+00  1.8061094019943988e+00  1.7141433548799525e+00  1.6254753549706427e+00
  1.5400614203872767e+00  1.4578551426747608e+00  1.3788078016164671e+00  1.3028684800486030e+00  1.2299841786745795e+00
  1.1600999308793787e+00  1.0931589175439238e+00  1.0291025818594464e+00  9.6787074414185525e-01  9.0940171664610459e-01
  8.5363241838056325e-01  8.0049848992138273e-01  7.4993440822686441e-01  7.0187360145183009e-01  6.5624856376198970e-01
  6.1299097014830872e-01  5.7203179124137682e-01  5.3330140812577964e-01  4.9672972715446129e-01  4.6224629476309786e-01
  4.2978041228446440e-01  3.9926125076280083e-01  3.7061796576818473e-01  3.4377981221089682e-01  3.1867625915579012e-01
  2.9523710463665864e-01  2.7339259047060516e-01  2.5307351707241210e-01  2.3421135826890538e-01  2.1673837611332658e-01
  2.0058773569970079e-01  1.8569361997720568e-01  1.7199134456453624e-01  1.5941747256427741e-01  1.4790992937727188e-01
  1.3740811751698612e-01  1.2785303142388083e-01  1.1918737227977960e-01  1.1135566282223541e-01  1.0430436214006560e-01
  9.7981972829954134e-02  9.2339084315638878e-02  8.7328343405617931e-02  8.2904412842554717e-02  7.9023929773302234e-02
  7.5645464218927178e-02  7.2729477544734120e-02  7.0238280930289679e-02  6.8135993839446629e-02  6.6388502490368151e-02
  6.4963418325551942e-02  6.3830036481854396e-02  6.2959294260514775e-02  6.2323729597179293e-02  6.1897439531925454e-02
  6.1656038679286047e-02  6.1576617698273384e-02  6.1637701762403498e-02  6.1819209029720192e-02  6.2102409112819335e-02
  6.2469881548872952e-02  6.2905474269653427e-02  6.3394262071557600e-02  6.3922505085630993e-02  6.4477607247591995e-02
  6.5048074767855957e-02  6.5623474601559387e-02  6.6194392918584144e-02  6.6752393573581537e-02  6.7289976575996530e-02
  6.7800536560091940e-02  6.8278321254972602e-02  6.8718389954609396e-02  6.9116571987863570e-02  6.9469425188510847e-02
  6.9774194365265579e-02  7.0028769771804972e-02  7.0231645576792984e-02  7.0381878333905162e-02  7.0479045451851741e-02
  7.0523203664403081e-02  7.0514847500412481e-02  7.0454867753841660e-02  7.0344509953783801e-02  7.0185332834488620e-02
  6.9979166805385851e-02  6.9728072421109510e-02  6.9434298851522802e-02  6.9100242351741115e-02  6.8728404732157161e-02
  6.8321351828464605e-02  6.7881671971682489e-02  6.7411934458178988e-02  6.6914648188300618e-02  6.6392227344000687e-02
  6.5846980676345937e-02  6.5281112995645568e-02  6.4696727371947510e-02  6.4095827335556646e-02  6.3480319077552888e-02
  6.2852013650309374e-02  6.2212629168010562e-02  6.1563793007170423e-02  6.0907044007150545e-02  6.0243834670678321e-02
  5.9575533364365038e-02  5.8903426519224068e-02  5.8228720831188990e-02  5.7552545461631736e-02  5.6875954237880735e-02
  5.6199927853739069e-02  5.5525376070002602e-02  5.4853139914978116e-02  5.4183993885001482e-02  5.3518648144955799e-02
  5.2857750728789503e-02  5.2201889740034563e-02  5.1551595552324581e-02  5.0907343009912967e-02  5.0269553628191063e-02
  4.9638597794206304e-02  4.9014796967180321e-02  4.8398425879027165e-02  4.7789714734871369e-02  4.7188851413566130e-02
  4.6595983668211452e-02  4.6011221326672284e-02  4.5434638492096675e-02  4.4866275743433909e-02  4.4306142335952620e-02
  4.3754218401759019e-02  4.3210457150314935e-02  4.2674787068956034e-02  4.2147114123409934e-02  4.1627323958314352e-02
  4.1115284097735239e-02  4.0610846145684942e-02  4.0113847986640347e-02  3.9624115986060998e-02  3.9141467190907289e-02
  3.8665711530158541e-02  3.8196654015331205e-02  3.7734096940996970e-02  3.7277842085300938e-02  3.6827692910479735e-02
  3.6383456763379680e-02  3.5944947075935992e-02  3.5511985494032193e-02  3.5084403160942919e-02  3.4662040747449697e-02
  3.4244748201982950e-02  3.3832384496961306e-02  3.3424817375130998e-02  3.3021923095905181e-02  3.2623586181703301e-02
  3.2229699164290464e-02  3.1840162331116736e-02  3.1454883471656564e-02  3.1073777623748054e-02  3.0696766819932397e-02
  3.0323779833793165e-02  2.9954751926295688e-02  2.9589624592126409e-02  2.9228345306032220e-02  2.8870867269159828e-02
  2.8517149155395109e-02  2.8167154857702440e-02  2.7820853234464076e-02  2.7478217855819491e-02  2.7139226750004720e-02
  2.6803862149691743e-02  2.6472110238327788e-02  2.6143960896474739e-02  2.5819407448148441e-02  2.5498446407158079e-02
  2.5181077223445526e-02  2.4867302029424682e-02  2.4557125386320849e-02  2.4250554030510053e-02  2.3947596619858437e-02
  2.3648263480061573e-02  2.3352566350983834e-02  2.3060518132997747e-02  2.2772132633323332e-02  2.2487424312367481e-02
  2.2206408030063275e-02  2.1929098792209369e-02  2.1655511496809311e-02  2.1385660680410930e-02  2.1119560264445669e-02
  2.0857223301567925e-02  2.0598661721994427e-02  2.0343886079843582e-02  2.0092905299474797e-02  1.9845726421827879e-02
  1.9602354350762363e-02  1.9362791599396845e-02  1.9127038036448378e-02  1.8895090632571783e-02  1.8666943206699035e-02
  1.8442586172950699e-02  1.8222006329670439e-02  1.8005186837026725e-02  1.7792107321810371e-02  1.7582743993007480e-02
  1.7377069757378259e-02  1.7175054335035828e-02  1.6976664375025045e-02  1.6781863570901303e-02  1.6590612776309348e-02
  1.6402870120562102e-02  1.6218591124219459e-02  1.6037728814667106e-02  1.5860233841695340e-02  1.5686054593077869e-02
  1.5515137310150638e-02  1.5347426203390633e-02  1.5182863567994696e-02  1.5021389899458334e-02  1.4862944009154538e-02
  1.4707463139912594e-02  1.4554883081596894e-02  1.4405138286685742e-02  1.4258161985850185e-02  1.4113886303532809e-02
  1.3972242373526553e-02  1.3833160454553531e-02  1.3696570045843837e-02  1.3562400002714362e-02  1.3430578652147602e-02
  1.3301033908370473e-02  1.3173693388433126e-02  1.3048484527787757e-02  1.2925334695867423e-02  1.2804171311664843e-02
  1.2684921959311226e-02  1.2567514503655078e-02  1.2451877205841009e-02  1.2337938838888556e-02  1.2225628803270987e-02
  1.2114877242494115e-02  1.2005615158675115e-02  1.1897774528121336e-02  1.1791288416909105e-02  1.1686091096462551e-02
  1.1582118159132413e-02  1.1479306633774850e-02  1.1377595101330261e-02  1.1276923810402087e-02  1.1177234792835632e-02
  1.1078471979296877e-02  1.0980581314851280e-02  1.0883510874542609e-02  1.0787210978971650e-02  1.0691634307238381e-02
  1.0596735964593158e-02  1.0502473462458119e-02  1.0408806672322789e-02  1.0315697779013901e-02  1.0223111233965233e-02
  1.0131013708487418e-02  1.0039374047037782e-02  9.9481632204901586e-03  9.8573542794047220e-03  9.7669223072978061e-03
  9.6768443739117336e-03  9.5870994884846347e-03  9.4976685530202797e-03  9.4085343155578989e-03  9.3196813234420074e-03
  9.2310958765922345e-03  9.1427659807731387e-03  9.0546813008640474e-03  8.9668331141288665e-03  8.8792142634859170e-03
  8.7918191107777526e-03  8.7046434900409850e-03  8.6176846607761166e-03  8.5309412612173535e-03  8.4444132616024407e-03
  8.3581019174424776e-03  8.2720097227917538e-03  8.1861403635175613e-03  8.1004986705700329e-03  8.0150905732519553e-03
  7.9299230524886022e-03  7.8450040940975501e-03  7.7603426420585148e-03  7.6759485517831679e-03  7.5918325433849626e-03
  7.5080061549489627e-03  7.4244816958016630e-03  7.3412721997808154e-03  7.2583913785052552e-03  7.1758535746447244e-03
  7.0936737151896974e-03  7.0118672647212048e-03  6.9304501786806583e-03  6.8494388566396796e-03  6.7688500955699182e-03
  6.6887010431128813e-03  6.6090091508497571e-03  6.5297921275712404e-03  6.4510678925473550e-03  6.3728545287972827e-03
  6.2951702363591849e-03  6.2180332855600266e-03  6.1414619703007052e-03  6.0654745636554265e-03  5.9900892874938157e-03
  5.9153242944058734e-03  5.8411976510991280e-03  5.7677273217994112e-03  5.6949311516516403e-03  5.6228268501205981e-03
  5.5514319743917087e-03  5.4807639127718178e-03  5.4108398680899729e-03  5.3416768410982016e-03  5.2732916138722927e-03
  5.2057007332125703e-03  5.1389204940446784e-03  5.0729669228203591e-03  5.0078557609182272e-03  4.9436024480445555e-03
  4.8802221056340502e-03  4.8177295202506288e-03  4.7561391269882059e-03  4.6954649928714638e-03  4.6357208002566364e-03
  4.5769198302322905e-03  4.5190749460200987e-03  4.4621985763756231e-03  4.4063026989890931e-03  4.3513988238861835e-03
  4.2974979768287984e-03  4.2446106827158424e-03  4.1927469489840066e-03  4.1419162490085454e-03  4.0921275055040528e-03
  4.0433890739252475e-03  3.9957087258677476e-03  3.9490936324688489e-03  3.9035503478083086e-03  3.8590847923091211e-03
  3.8157022361382967e-03  3.7734072826076438e-03  3.7322038515745439e-03  3.6920951628427357e-03  3.6530837195630898e-03
  3.6151712916343897e-03  3.5783588991041108e-03  3.5426467955692008e-03  3.5080344515768555e-03  3.4745205380253010e-03
  3.4421029095645728e-03  3.4107785879972925e-03  3.3805437456794507e-03  3.3513936889211803e-03  3.3233228413875418e-03
  3.2963247274993002e-03  3.2703919562009406e-03  3.2455162142768644e-03  3.2216882839052764e-03  3.1988980697602448e-03
  3.1771346264810041e-03  3.1563861861412554e-03  3.1366401857184671e-03  3.1178832945631778e-03  3.1001014418682946e-03
  3.0832798441383976e-03  3.0674030326590376e-03  3.0524548809660393e-03  3.0384186323148018e-03  3.0252769271495996e-03
  3.0130118305728842e-03  3.0016048598145847e-03  2.9910370117014087e-03  2.9812887901261432e-03  2.9723402335169570e-03
  2.9641709423067009e-03  2.9567601064022083e-03  2.9500865326535976e-03  2.9441286723235712e-03  2.9388646485567194e-03
  2.9342722838488189e-03  2.9303291275161354e-03  2.9270124831647245e-03  2.9242994361597320e-03  2.9221668810946962e-03
  2.9205915492608475e-03  2.9195500361164110e-03  2.9190188287559070e-03  2.9189743333794512e-03  2.9193929027620572e-03
  2.9202508637229375e-03  2.9215245445948020e-03  2.9231903026931639e-03  2.9252245517856364e-03  2.9276037895612354e-03
  2.9303046250996811e-03  2.9333038063406990e-03  2.9365782475533199e-03  2.9401050568051814e-03  2.9438615634318297e-03
  2.9478253455060208e-03  2.9519742573070203e-03  2.9562864567899056e-03  2.9607404330548666e-03  2.9653150338165061e-03
  2.9699894928731430e-03  2.9747434575761113e-03  2.9795570162990609e-03  2.9844107259072617e-03  2.9892856392229983e-03
  2.9941633309083565e-03  2.9990259101223150e-03  3.0038560181032846e-03  3.0086368232637938e-03  3.0133520162687285e-03
  3.0179858051135721e-03  3.0225229102026452e-03  3.0269485594273454e-03  3.0312484832443879e-03  3.0354089097540445e-03
  3.0394165597783839e-03  3.0432586419395120e-03  3.0469228477378102e-03  3.0503973466301775e-03  3.0536707811082693e-03
  3.0567322617767365e-03  3.0595713624314669e-03  3.0621781151378238e-03  3.0645430053088873e-03  3.0666569667836922e-03
  3.0685113769054698e-03  3.0700980515998870e-03  3.0714092404532860e-03  3.0724376217909242e-03  3.0731762977552150e-03
  3.0736187893839659e-03  3.0737590316886206e-03  3.0735913687324969e-03  3.0731105487090279e-03  3.0723117190200010e-03
  3.0711904213537988e-03  3.0697425867636375e-03  3.0679645307458087e-03  3.0658529483179177e-03  3.0634049090971240e-03
  3.0606178523783808e-03  3.0574895822126765e-03  3.0540182624852713e-03  3.0502024119939413e-03  3.0460408995272143e-03
  3.0415329389426129e-03  3.0366780842448924e-03  3.0314762246642815e-03  3.0259275797347223e-03  3.0200326943721090e-03
  3.0137924339525301e-03  3.0072079793905062e-03  3.0002808222172306e-03  2.9930127596588087e-03  2.9854058897144991e-03
  2.9774626062349526e-03  2.9691855940004522e-03  2.9605778237991524e-03  2.9516425474876186e-03  2.9423832923122948e-03
  2.9328038527520403e-03  2.9229082810794350e-03  2.9127008778475050e-03  2.9021861823764401e-03  2.8913689632403170e-03
  2.8802542087538177e-03  2.8688471174589513e-03  2.8571530886117745e-03  2.8451777126691112e-03  2.8329267617752734e-03
  2.8204061802487822e-03  2.8076220750690873e-03  2.7945807063632891e-03  2.7812884778928570e-03  2.7677519275403515e-03
  2.7539777177961449e-03  2.7399726262451398e-03  2.7257435360534916e-03  2.7112974264553295e-03  2.6966413632394737e-03
  2.6817824892361596e-03  2.6667280148037560e-03  2.6514852083154867e-03  2.6360613866461503e-03  2.6204639056588413e-03
  2.6047001506916698e-03  2.5887775270444827e-03  2.5727034504655849e-03  2.5564853376384570e-03  2.5401305966684796e-03
  2.5236466175696504e-03  2.5070407627513069e-03  2.4903203575048463e-03  2.4734926804904456e-03  2.4565649542237821e-03
  2.4395443355627543e-03  2.4224379061942025e-03  2.4052526631206284e-03  2.3879955091469169e-03  2.3706732433670559e-03
  2.3532925516508560e-03  2.3358599971306728e-03  2.3183820106881256e-03  2.3008648814408198e-03  2.2833147472290645e-03
  2.2657375851025965e-03  2.2481392018072980e-03  2.2305252242719189e-03  2.2129010900947960e-03  2.1952720380305746e-03
  2.1776430984769275e-03  2.1600190839614879e-03  2.1424045800157543e-03  2.1248039406169504e-03  2.1072212904018560e-03
  2.0896605283933912e-03  2.0721253317477484e-03  2.0546191595015228e-03  2.0371452563188426e-03  2.0197066562385015e-03
  2.0023061864210901e-03  1.9849464708961233e-03  1.9676299343091772e-03  1.9503588056690141e-03  1.9331351220947179e-03
  1.9159607325628233e-03  1.8988373016544469e-03  1.8817663133024185e-03  1.8647490745384121e-03  1.8477867192400769e-03
  1.8308802118781687e-03  1.8140303512636795e-03  1.7972377742949712e-03  1.7805029597049034e-03  1.7638262318079674e-03
  1.7472077642474153e-03  1.7306475837423918e-03  1.7141455738350646e-03  1.6977014786377568e-03  1.6813149065800764e-03
  1.6649853341560482e-03  1.6487121096712448e-03  1.6324944569899170e-03  1.6163314792821256e-03  1.6002221627708722e-03
  1.5841653804792297e-03  1.5681598959774747e-03  1.5522043671302166e-03  1.5362973498435298e-03  1.5204373018120857e-03
  1.5046225862662816e-03  1.4888514757193726e-03  1.4731221557146034e-03  1.4574327285723390e-03  1.4417812171371943e-03
  1.4261655685251673e-03  1.4105836578707691e-03  1.3950332920741541e-03  1.3795122135482531e-03  1.3640181039659021e-03
  1.3485485880069753e-03  1.3331012371055144e-03  1.3176735731968607e-03  1.3022630724647865e-03  1.2868671690886243e-03
  1.2714832589983676e-03  1.2561087042163841e-03  1.2407408398251699e-03  1.2253769827064657e-03  1.2100144404304349e-03
  1.1946505201449230e-03  1.1792825374647171e-03  1.1639078253608054e-03  1.1485237430496373e-03  1.1331276848823824e-03
  1.1177170892341902e-03  1.1022894473934500e-03  1.0868423124510498e-03  1.0713733081896366e-03  1.0558801379728750e-03
  1.0403605936347080e-03  1.0248125643686156e-03  1.0092340456168748e-03  9.9362314795981856e-04  9.7797810600509685e-04
  9.6229728727693421e-04  9.4657920110539071e-04  9.3082250751562131e-04  9.1502602611713449e-04  8.9918874499305356e-04
  8.8330982958937417e-04  8.6738863160422570e-04  8.5142469787712950e-04  8.3541777927825930e-04  8.1936783959770017e-04
  8.0327506443470843e-04  7.8713987008697129e-04  7.7096291243986610e-04  7.5474509585571998e-04  7.3848758206306964e-04
  7.2219179904592064e-04  7.0585944993300717e-04  6.8949252188705147e-04  6.7309329499402339e-04  6.5666435115240018e-04
  6.4020858296242548e-04  6.2372920261536964e-04  6.0722975078278884e-04  5.9071410550578455e-04  5.7418649108426350e-04
  5.5765148696619680e-04  5.4111403663687971e-04  5.2457945650819144e-04  5.0805344480785413e-04  4.9154209046869306e-04
  4.7505188201789567e-04  4.5858971646627121e-04  4.4216290819751086e-04  4.2577919785742786e-04  4.0944676061999981e-04
  3.9317420374819511e-04  3.7697054344212433e-04  3.6084517551196059e-04  3.4480784590294424e-04  3.2886862122038802e-04
  3.1303785925468179e-04  2.9732617950629795e-04  2.8174443371079580e-04  2.6630367636382716e-04  2.5101513524614083e-04
  2.3589018194858792e-04  2.2094030239712661e-04  2.0617706737782729e-04  1.9161210306187733e-04  1.7725706153058634e-04
  1.6312359130039091e-04  1.4922330784785965e-04  1.3556776413469818e-04  1.2216842113275429e-04  1.0903661834902250e-04
  9.6183544350649474e-05  8.3620207289938702e-05  7.1357405429355535e-05  5.9405697666532460e-05  4.7775374059273528e-05
  3.6476426350559859e-05  2.5518518493554225e-05  1.4910957176606345e-05  4.6626623482575705e-06 -5.2178622577538731e-06
 -1.4722558597487980e-05 -2.3843843791798215e-05 -3.2574639601326279e-05 -4.0908401901497144e-05 -4.8839150157514255e-05
 -5.6361496899354181e-05 -6.3470677196762195e-05 -7.0162578134246717e-05 -7.6433768286074996e-05 -8.2281527191267279e-05
 -8.7703874828592608e-05 -9.2699601091563528e-05 -9.7268295263430802e-05 -1.0141037549217909e-04 -1.0512711826552156e-04
 -1.0842068788589492e-04 -1.1129416594545444e-04 -1.1375158080106912e-04 -1.1579793704931662e-04 -1.1743924500147825e-04
 -1.1868255015853407e-04 -1.1953596268615766e-04 -1.2000868683902743e-04 -1.2011104271778626e-04 -1.1985444156752584e-04
 -1.1925132031582600e-04 -1.1831507123331340e-04 -1.1705997158219243e-04 -1.1550111326477610e-04 -1.1365433247201694e-04
 -1.1153613933203792e-04 -1.0916364755866333e-04 -1.0655450409994974e-04 -1.0372681878671683e-04 -1.0069909398107831e-04
 -9.7490154224972870e-05 -9.4119075888695052e-05 -9.0605116819426112e-05 -8.6967645989765013e-05 -8.3226073146259251e-05
 -7.9399778457935798e-05 -7.5508042164832020e-05 -7.1569974226526469e-05 -6.7604443970669959e-05 -6.3630009741516363e-05
 -5.9664848548453511e-05 -5.5726685714534120e-05 -5.1832724525006736e-05 -4.7999575875846506e-05 -4.4243187922286296e-05
 -4.0578775727347378e-05 -3.7020750910370432e-05 -3.3582651295546498e-05 -3.0277070560447765e-05 -2.7115587884558539e-05
 -2.4108697597806188e-05 -2.1265738829091962e-05 -1.8594825154821904e-05 -1.6102774247437839e-05 -1.3795037523948195e-05
 -1.1675629794458933e-05 -9.7470589107043855e-06 -8.0102554145783622e-06 -6.4645021866647682e-06 -5.1073640947687154e-06
 -3.9346176424474069e-06 -2.9401806175408980e-06 -2.1160417407031838e-06 -1.4521903139329739e-06 -9.3654586910464383e-07
 -5.5488781649917285e-07 -2.9078509333486501e-07 -1.2552581229857143e-07 -3.8046910076384175e-08 -4.8637958844385647e-09
  0.0000000000000000e+00
  0.0000000000000000e+00  2.4748126127473532e+02  3.7743960075555952e+02  4.2321270877151750e+02  4.1653642425022053e+02
  3.8569644479536908e+02  3.5297373187314088e+02  3.3213337034953861e+02  3.2765392359130715e+02  3.3590724999977920e+02
  3.4808901036160330e+02  3.5477424714904436e+02  3.5024598346924779e+02  3.3393478355749420e+02  3.0987199527724113e+02
  2.8473118565791088e+02  2.6462975829802286e+02  2.5254231788361810e+02  2.4807850885492098e+02  2.4831398542076735e+02
  2.4920587219659117e+02  2.4746006727587556e+02  2.4173819300685489e+02  2.3254698927276380e+02  2.2165680825100068e+02
  2.1126118697133558e+02  2.0297396756547948e+02  1.9730610271095446e+02  1.9382098961515052e+02  1.9148770621785238e+02
  1.8914287911502092e+02  1.8599600103670724e+02  1.8183795771089984e+02  1.7692730924988436e+02  1.7179540577565382e+02
  1.6700438580927838e+02  1.6290078979979759e+02  1.5953892813962474e+02  1.5675126215536542e+02  1.5425104689037758e+02
  1.5175468026482619e+02  1.4909723527146767e+02  1.4625715460510602e+02  1.4331693515815260e+02  1.4041093655140250e+02
  1.3766479103536034e+02  1.3514242892088120e+02  1.3283987732077796e+02  1.3070612908759207e+02  1.2866905256475587e+02
  1.2666469706915389e+02  1.2466076500299836e+02  1.2265705026001915e+02  1.2067481884620898e+02  1.1874415465029033e+02
  1.1688992460174100e+02  1.1512157148013232e+02  1.1343397645000556e+02  1.1181273229100211e+02  1.1024021900217353e+02
  1.0870218105933154e+02  1.0719199697323776e+02  1.0570982831419066e+02  1.0426005594720193e+02  1.0284837936754587e+02
  1.0147874039495191e+02  1.0015156690037942e+02  9.8864349524313539e+01  9.7612868384353689e+01  9.6392553198362606e+01
  9.5199882996820122e+01  9.4033069047587162e+01  9.2891715668240209e+01  9.1776237786633317e+01  9.0687219014146351e+01
  8.9624768295551561e+01  8.8588257809473689e+01  8.7576506529507199e+01  8.6588051718417518e+01  8.5621443105241113e+01
  8.4675525222995390e+01  8.3749527459824080e+01  8.2842968864028038e+01  8.1955530228006552e+01  8.1086915055597871e+01
  8.0236720762301104e+01  7.9404407693078511e+01  7.8589346039641384e+01  7.7790873761357375e+01  7.7008358115783707e+01
  7.6241248993066819e+01  7.5489086315875113e+01  7.4751476817158917e+01  7.4028066311885311e+01  7.3318509781912439e+01
  7.2622446523753368e+01  7.1939498273237490e+01  7.1269279846172765e+01  7.0611410985937923e+01  6.9965528596716823e+01
  6.9331295831043391e+01  6.8708401374954576e+01  6.8096554091029873e+01  6.7495476900964889e+01  6.6904900195381018e+01
  6.6324557079122513e+01  6.5754183700316801e+01  6.5193521413547430e+01  6.4642318990408540e+01  6.4100334762750876e+01
  6.3567337832221845e+01  6.3043107467862008e+01  6.2527431832905137e+01  6.2020106512692124e+01  6.1520932916282284e+01
  6.1029717285238377e+01  6.0546270812645993e+01  6.0070409984597916e+01  5.9601956863385496e+01  5.9140739294303032e+01
  5.8686590911441634e+01  5.8239350891498660e+01  5.7798863592709587e+01  5.7364978112463504e+01  5.6937547800531455e+01
  5.6516429986477668e+01  5.6101485965477842e+01  5.5692580985586581e+01  5.5289584187958255e+01  5.4892368506630078e+01
  5.4500810565714033e+01  5.4114790572544742e+01  5.3734192172908266e+01  5.3358902263659061e+01  5.2988810788480301e+01
  5.2623810626952462e+01  5.2263797551775639e+01  5.1908670165330392e+01  5.1558329805823128e+01  5.1212680438174552e+01
  5.0871628580084575e+01  5.0535083242715110e+01  5.0202955849254586e+01  4.9875160128693622e+01  4.9551612005942630e+01
  4.9232229542599164e+01  4.8916932896536821e+01  4.8605644264327644e+01  4.8298287804721809e+01  4.7994789560444950e+01
  4.7695077412201726e+01  4.7399081038573115e+01  4.7106731861128935e+01  4.6817962974574947e+01  4.6532709080280441e+01
  4.6250906450148058e+01  4.5972492893899542e+01  4.5697407714318132e+01  4.5425591650885806e+01  4.5156986828190320e+01
  4.4891536726519249e+01  4.4629186152171926e+01  4.4369881197788757e+01  4.4113569193700947e+01  4.3860198665958059e+01
  4.3609719312401587e+01  4.3362081977057940e+01  4.3117238616336884e+01  4.2875142258387093e+01  4.2635746969654761e+01
  4.2399007834848433e+01  4.2164880934238766e+01  4.1933323314198532e+01  4.1704292952645083e+01  4.1477748732023976e+01
  4.1253650422334452e+01  4.1031958661145552e+01  4.0812634928033091e+01  4.0595641515359588e+01  4.0380941506537063e+01
  4.0168498761594940e+01  3.9958277899703049e+01  3.9750244277083873e+01  3.9544363962397505e+01  3.9340603718939143e+01
  3.9138930991698501e+01  3.8939313891473034e+01  3.8741721175147710e+01  3.8546122224570503e+01  3.8352487032475949e+01
  3.8160786192161062e+01  3.7970990884538530e+01  3.7783072862034132e+01  3.7597004431363544e+01  3.7412758440665677e+01
  3.7230308267878563e+01  3.7049627806606182e+01  3.6870691449331588e+01  3.6693474071659274e+01  3.6517951025172557e+01
  3.6344098133162433e+01  3.6171891684455964e+01  3.6001308425066547e+01  3.5832325546897337e+01  3.5664920672309009e+01
  3.5499071835710076e+01  3.5334757462869973e+01  3.5171956348657048e+01  3.5010647645056082e+01  3.4850810872820375e+01
  3.4692425940016250e+01  3.4535473159869866e+01  3.4379933265980981e+01  3.4225787402022902e+01  3.4073017068136679e+01
  3.3921604053726135e+01  3.3771530366948262e+01  3.3622778168020737e+01  3.3475329776295879e+01  3.3329167784976825e+01
  3.3184275200954204e+01  3.3040635587653526e+01  3.2898233188335603e+01  3.2757052856573168e+01  3.2617079753411275e+01
  3.2478298995709203e+01  3.2340695294242046e+01  3.2204252655946362e+01  3.2068954596853075e+01  3.1934784872366951e+01
  3.1801728297177011e+01  3.1669771584162742e+01  3.1538903969453862e+01  3.1409116533548559e+01  3.1280400416348165e+01
  3.1152744865002454e+01  3.1026135240212930e+01  3.0900551666805903e+01  3.0775970828190857e+01  3.0652369993663264e+01
  3.0529731337944948e+01  3.0408046347111359e+01  3.0287319265829492e+01  3.0167566634976339e+01  3.0048814523192274e+01
  2.9931095529462500e+01  2.9814445723301951e+01  2.9698902079756071e+01  2.9584501616257658e+01  2.9471281350239781e+01
  3.0518003632056910e+01  3.0261807014706761e+01  3.0003502582445638e+01  2.9743107733703646e+01  2.9480644221308790e+01
  2.9216138086599301e+01  2.8949619590017228e+01  2.8681123138183274e+01  2.8410687207452852e+01  2.8138354263953403e+01
  2.7864170680102962e+01  2.7588186647609959e+01  2.7310456086954275e+01  2.7031036553349509e+01  2.6749989139186546e+01
  2.6467378372958297e+01  2.6183272114665762e+01  2.5897741447705268e+01  2.5610860567236998e+01  2.5322706665034726e+01
  2.5033359810816830e+01  2.4742902830058544e+01  2.4451421178285404e+01  2.4159002811848033e+01  2.3865738055178078e+01
  2.3571719464525426e+01  2.3277041688176684e+01  2.2981801323154887e+01  2.2686096768400425e+01  2.2390028074433260e+01
  2.2093696789496338e+01  2.1797205802180297e+01  2.1500659180529386e+01  2.1204162007628607e+01  2.0907820213672171e+01
  2.0611740404513121e+01  2.0316029686694250e+01  2.0020795488960232e+01  1.9726145380251030e+01  1.9432186884176510e+01
  1.9139027289972329e+01  1.8846773459937040e+01  1.8555531633350483e+01  1.8265407226873364e+01  1.7976504631428131e+01
  1.7688927005561037e+01  1.7402776065285533e+01  1.7118151870406781e+01  1.6835152607327558e+01  1.6553874368335261e+01
  1.6274410927370266e+01  1.5996853512275459e+01  1.5721290573527067e+01  1.5447807549446672e+01  1.5176486627926961e+01
  1.4907406517832126e+01  1.4640642327751770e+01  1.4376265570152016e+01  1.4114344187851874e+01  1.3854942582428846e+01
  1.3598121644417541e+01  1.3343938785301283e+01  1.3092447971296755e+01  1.2843699758931642e+01  1.2597741332415284e+01
  1.2354616542802352e+01  1.2114365948949537e+01  1.1877026860265229e+01  1.1642633381252244e+01  1.1411216457843521e+01
  1.1182803925530887e+01  1.0957420559286769e+01  1.0735088125278972e+01  1.0515825434378442e+01  1.0299648397460050e+01
  1.0086570082496383e+01  9.8766007734445616e+00  9.6697480309260406e+00  9.4660167546994654e+00  9.2654092479264936e+00
  9.0679252832306645e+00  8.8735621705492669e+00  8.6823148267782191e+00  8.4941758472099558e+00  8.3091355787643622e+00
  8.1271821950126402e+00  7.9483017729942933e+00  7.7724783718270398e+00  7.5996941131097842e+00  7.4299292631185692e+00
  7.2631623167955741e+00  7.0993700835310936e+00  6.9385277747385530e+00  6.7806090932225223e+00  6.6255863243397428e+00
  6.4734304289531828e+00  6.3241111381790747e+00  6.1775970499269963e+00  6.0338557272329441e+00  5.8928537983854339e+00
  5.7545570588445907e+00  5.6189305749542839e+00  5.4859387894472391e+00  5.3555456287431999e+00  5.2277146120400557e+00
  5.1024089621980462e+00  4.9795917184168932e+00  4.8592258507060402e+00  4.7412743757140650e+00  4.6257004561848030e+00
  4.5124674408176215e+00  4.4015388729364924e+00  4.2928784972492897e+00  4.1864502665145658e+00  4.0822183481158403e+00
  3.9801471305434113e+00  3.8802012297836903e+00  3.7823454956160547e+00  3.6865450178172225e+00  3.5927651322731515e+00
  3.5009714269984507e+00  3.4111297480633249e+00  3.3232062054280287e+00  3.2371671786848486e+00  3.1529793227076026e+00
  3.0706095732086647e+00  2.9900251522035055e+00  2.9111935733827563e+00  2.8340826473917953e+00  2.7586604870178530e+00
  2.6848955122846383e+00  2.6127564554544871e+00  2.5422123659380307e+00  2.4732326151113866e+00  2.4057869010408686e+00
  2.3398452531152181e+00  2.2753780365853586e+00  2.2123559570116678e+00  2.1507500646187721e+00  2.0905317585578662e+00
  2.0316727910765451e+00  1.9741452715961616e+00  1.9179216706967119e+00  1.8629748240092272e+00  1.8092779360156988e+00
  1.7568045837565185e+00  1.7055287204454421e+00  1.6554246789920732e+00  1.6064671754318669e+00  1.5586313122636541e+00
  1.5118925816946918e+00  1.4662268687932289e+00  1.4216104545485946e+00  1.3780200188388056e+00  1.3354326433057031e+00
  1.2938258141375989e+00  1.2531774247594480e+00  1.2134657784305471e+00  1.1746695907497413e+00  1.1367679920681693e+00
  1.0997405298095106e+00  1.0635671706976926e+00  1.0282283027521575e+00  9.9370473553256122e-01  9.5997769780385989e-01
  9.2702883449606899e-01  8.9484020349430604e-01  8.6339427226651511e-01  8.3267391432886928e-01  8.0266240554885493e-01
  7.7334342028603487e-01  7.4470102737049237e-01  7.1671968591895385e-01  6.8938424098859308e-01  6.6267991906851476e-01
  6.3659232340891725e-01  6.1110742918793715e-01  5.8621157851617212e-01  5.6189147527888439e-01  5.3813417981588485e-01
  5.1492710343909598e-01  4.9225800278779558e-01  4.7011497402154051e-01  4.4848644685076988e-01  4.2736117840508886e-01
  4.0672824693923182e-01  3.8657704537670656e-01  3.6689727469111683e-01  3.4767893712516695e-01  3.2891232924734443e-01
  3.1058803484628394e-01  2.9269691766281081e-01  2.7523011395966435e-01  2.5817902492890188e-01  2.4153530893698180e-01
  2.2529087360752678e-01  2.0943786774176840e-01  1.9396867307666954e-01  1.7887589588072833e-01  1.6415235838746234e-01
  1.4979109006657063e-01  1.3578531873277874e-01  1.2212846149236156e-01  1.0881411552734684e-01  9.5836048717398509e-02
  8.3188190099380749e-02  7.0864620164601419e-02  5.8859560993734947e-02  4.7167366229427014e-02  3.5782510886576434e-02
  2.4699581000300667e-02  1.3913263111577605e-02  3.4183335905703105e-03 -6.7903522023704619e-03 -1.6717870918021793e-02
 -2.6369242363582984e-02 -3.5749439456713328e-02 -4.4863392252860464e-02 -5.3715987935118219e-02 -6.2312070469691158e-02
 -7.0656440270749243e-02 -7.8753853874859184e-02 -8.6609023624992523e-02 -9.4226617364110324e-02 -1.0161125813832479e-01
 -1.0876752390963738e-01 -1.1569994727825367e-01 -1.2241301521447508e-01 -1.2891116880016712e-01 -1.3519880297980441e-01
 -1.4128026632109250e-01 -1.4715986078516627e-01 -1.5284184150636507e-01 -1.5833041658158470e-01 -1.6362974686920581e-01
 -1.6874394579759938e-01 -1.7367707918320865e-01 -1.7843316505820778e-01 -1.8301617350773738e-01 -1.8743002651671661e-01
 -1.9167859782623181e-01 -1.9576571279950256e-01 -1.9969514829742330e-01 -2.0347063256368278e-01 -2.0709584511945964e-01
 -2.1057441666769469e-01 -2.1390992900694003e-01 -2.1710591495478504e-01 -2.2016585828085850e-01 -2.2309319364940844e-01
 -2.2589130657145753e-01 -2.2856353336653590e-01 -2.3111316113399066e-01 -2.3354342773387168e-01 -2.3585752177739480e-01
 -2.3805858262698076e-01 -2.4014970040587194e-01 -2.4213391601732492e-01 -2.4401422117338020e-01 -2.4579355843320852e-01
 -2.4747482125103404e-01 -2.4906085403363387e-01 -2.5055445220741479e-01 -2.5195836229506607e-01 -2.5327528200178950e-01
 -2.5450786031110634e-01 -2.5565869759024007e-01 -2.5673034570507675e-01 -2.5772530814470135e-01 -2.5864604015443515e-01
 -2.5949494885990648e-01 -2.6027439336455294e-01 -2.6098668484532922e-01 -2.6163408665697235e-01 -2.6221881444507616e-01
 -2.6274303626797707e-01 -2.6320887272744997e-01 -2.6361839710821489e-01 -2.6397363552625397e-01 -2.6427656708593894e-01
 -2.6452912404596912e-01 -2.6473319199412021e-01 -2.6489061003080316e-01 -2.6500317096143355e-01 -2.6507262149761207e-01
 -2.6510066246711483e-01 -2.6508894903269437e-01 -2.6503909091969130e-01 -2.6495265265245660e-01 -2.6483115379958383e-01
 -2.6467606922795250e-01 -2.6448882936558149e-01 -2.6427082047329326e-01 -2.6402338492518845e-01 -2.6374782149793097e-01
 -2.6344538566884351e-01 -2.6311728992281386e-01 -2.6276470406801128e-01 -2.6238875556041402e-01 -2.6199052983714644e-01
 -2.6157107065862756e-01 -2.6113138045952955e-01 -2.6067242070854690e-01 -2.6019511227697600e-01 -2.5970033581610541e-01
 -2.5918893214341637e-01 -2.5866170263759419e-01 -2.5811940964234981e-01 -2.5756277687905182e-01 -2.5699248986816953e-01
 -2.5640919635952564e-01 -2.5581350677136033e-01 -2.5520599463820542e-01 -2.5458719706756888e-01 -2.5395761520543020e-01
 -2.5331771471054593e-01 -2.5266792623756612e-01 -2.5200864592896094e-01 -2.5134023591575788e-01 -2.5066302482708941e-01
 -2.4997730830855142e-01 -2.4928334954937173e-01 -2.4858137981853873e-01 -2.4787159903235281e-01 -2.4715417646827112e-01
 -2.4642925160985768e-01 -2.4569693501793446e-01 -2.4495730921366071e-01 -2.4421042957350583e-01 -2.4345632523611474e-01
 -2.4269500002106684e-01 -2.4192643335952779e-01 -2.4115058123679445e-01 -2.4036737714673295e-01 -2.3957673305810989e-01
 -2.3877854039281646e-01 -2.3797267101598574e-01 -2.3715897823800330e-01 -2.3633729782841048e-01 -2.3550744904170121e-01
 -2.3466923565501147e-01 -2.3382244701770219e-01 -2.3296685911283518e-01 -2.3210223563054203e-01 -2.3122832905328616e-01
 -2.3034488175301798e-01 -2.2945162710022324e-01 -2.2854829058486412e-01 -2.2763459094921401e-01 -2.2671024133258461e-01
 -2.2577495042794699e-01 -2.2482842365044495e-01 -2.2387036431780200e-01 -2.2290047484262121e-01 -2.2191845793657822e-01
 -2.2092401782650720e-01 -2.1991686148238018e-01 -2.1889669985717924e-01 -2.1786324913866184e-01 -2.1681623201301933e-01
 -2.1575537894042840e-01 -2.1468042944249577e-01 -2.1359113340159605e-01 -2.1248725237210220e-01 -2.1136856090350981e-01
 -2.1023484787545391e-01 -2.0908591784461908e-01 -2.0792159240354274e-01 -2.0674171155131127e-01 -2.0554613507614947e-01
 -2.0433474394990309e-01 -2.0310744173441425e-01 -2.0186415599979021e-01 -2.0060483975456500e-01 -1.9932947288775432e-01
 -1.9803806362280349e-01 -1.9673064996480807e-01 -1.9540730067454629e-01 -1.9406811501671539e-01 -1.9271322201701380e-01
 -1.9134277969113930e-01 -1.8995697426426339e-01 -1.8855601938098299e-01 -1.8714015530574837e-01 -1.8570964811376794e-01
 -1.8426478887238984e-01 -1.8280589281295997e-01 -1.8133329849315705e-01 -1.7984736694980394e-01 -1.7834848084215629e-01
 -1.7683704358566710e-01 -1.7531347847622877e-01 -1.7377822780489119e-01 -1.7223175196305698e-01 -1.7067452853815321e-01
 -1.6910705139977975e-01 -1.6752982977633474e-01 -1.6594338732211605e-01 -1.6434826117490026e-01 -1.6274500100399744e-01
 -1.6113416804878361e-01 -1.5951633414770910e-01 -1.5789208075778391e-01 -1.5626199796453982e-01 -1.5462668348246922e-01
 -1.5298674164594037e-01 -1.5134278239058971e-01 -1.4969542022519064e-01 -1.4804527319399907e-01 -1.4639296182957562e-01
 -1.4473910809608465e-01 -1.4308433432306983e-01 -1.4142926212970647e-01 -1.3977451133953059e-01 -1.3812069888564460e-01
 -1.3646843770639985e-01 -1.3481833563155557e-01 -1.3317099425891474e-01 -1.3152700782143686e-01 -1.2988696204482691e-01
 -1.2825143299560138e-01 -1.2662098591963075e-01 -1.2499617407115901e-01 -1.2337753753229949e-01 -1.2176560202300768e-01
 -1.2016087770153067e-01 -1.1856385795533313e-01 -1.1697501818250026e-01 -1.1539481456361718e-01 -1.1382368282431819e-01
 -1.1226203706667669e-01 -1.1071026924759299e-01 -1.0916874940273559e-01 -1.0763782599774512e-01 -1.0611782628487827e-01
 -1.0460905666427996e-01 -1.0311180304988342e-01 -1.0162633123993883e-01 -1.0015288729216959e-01 -9.8691697903557127e-02
 -9.7242970794753664e-02 -9.5806895099123143e-02 -9.4383641756410355e-02 -9.2973363911038137e-02 -9.1576197315032692e-02
 -9.0192260735577207e-02 -8.8821656367193386e-02 -8.7464470248551335e-02 -8.6120772683907401e-02 -8.4790618669170315e-02
 -8.3474048322595334e-02 -8.2171087320106709e-02 -8.0881747335247958e-02 -7.9606026483760778e-02 -7.8343909772791584e-02
 -7.7095369554726553e-02 -7.5860365985654613e-02 -7.4638847488458671e-02 -7.3430751220534940e-02 -7.2236003546140404e-02
 -7.1054520513368427e-02 -6.9886208335752570e-02 -6.8730963878498363e-02 -6.7588675149343511e-02 -6.6459221794045911e-02
 -6.5342475596500069e-02 -6.4238300983481544e-02 -6.3146555534019530e-02 -6.2067090493397585e-02 -6.0999751291782534e-02
 -5.9944378067481520e-02 -5.8900806194827085e-02 -5.7868866816690560e-02 -5.6848387381623462e-02 -5.5839192185627072e-02
 -5.4841102918550190e-02 -5.3853939215114985e-02 -5.2877519210570989e-02 -5.1911660100977280e-02 -5.0956178708112726e-02
 -5.0010892049014433e-02 -4.9075617910144309e-02 -4.8150175426183821e-02 -4.7234385661274962e-02 -4.6328072103661702e-02
 -4.5431060857846720e-02 -4.4543180679561971e-02 -4.3664263001568240e-02 -4.2794141959450409e-02 -4.1932654417408920e-02
 -4.1079639994047283e-02 -4.0234941088155812e-02 -3.9398402904491307e-02 -3.8569873479552971e-02 -3.7749203707354420e-02
 -3.6936247365191764e-02 -3.6130861139407812e-02 -3.5332904651152429e-02 -3.4542240482138935e-02 -3.3758734200396698e-02
 -3.2982254386019753e-02 -3.2212672656911606e-02 -3.1449863694526098e-02 -3.0693705269604389e-02 -2.9944078267908097e-02
 -2.9200866715948508e-02 -2.8463957806711859e-02 -2.7733241925380847e-02 -2.7008612675052140e-02 -2.6289966902450033e-02
 -2.5577204723636265e-02 -2.4870229549715843e-02 -2.4168948112539109e-02 -2.3473270490399788e-02 -2.2783110133729252e-02
 -2.2098383890786825e-02 -2.1419012033346237e-02 -2.0744918282378167e-02 -2.0076029833728939e-02 -1.9412277383795268e-02
 -1.8753595155195160e-02 -1.8099920922434919e-02 -1.7451196037572239e-02 -1.6807365455875460e-02 -1.6168377761478864e-02
 -1.5534185193034161e-02 -1.4904743669358003e-02 -1.4280012815075698e-02 -1.3659955986260953e-02 -1.3044540296071785e-02
 -1.2433736640382533e-02 -1.1827519723411927e-02 -1.1225868083347391e-02 -1.0628764117965301e-02 -1.0036194110247488e-02
 -9.4481482539937791e-03 -8.8646206794295770e-03 -8.2856094768083040e-03 -7.7111166963414329e-03 -7.1411483128188923e-03
 -6.5757141819101613e-03 -6.0148279958326945e-03 -5.4585072384936142e-03 -4.9067731401047062e-03 -4.3596506312707098e-03
 -3.8171682965508990e-03 -3.2793583274939491e-03 -2.7462564751461042e-03 -2.2179020020326361e-03 -1.6943376336125925e-03
 -1.1756095092068342e-03 -6.6176713239937473e-04 -1.5286332091201001e-04  3.5104584404777647e-04  8.4990106896558522e-04
  1.3436398997256046e-03  1.8321967738428226e-03  2.3155030732219229e-03  2.7934871774429114e-03  3.2660745175734423e-03
  3.7331876305078575e-03  4.1947462138329167e-03  4.6506671812202548e-03  5.1008647183455359e-03  5.5452503393343174e-03
  5.9837329437346289e-03  6.4162188740162383e-03  6.8426119735966436e-03  7.2628136453937869e-03  7.6767229109054192e-03
  8.0842364698152439e-03  8.4852487601257236e-03  8.8796520188175899e-03  9.2673363430361005e-03  9.6481897518039591e-03
  1.0022098248260988e-02  1.0388945882430441e-02  1.0748614814512121e-02  1.1100985378702103e-02  1.1445936147539242e-02
  1.1783343996778333e-02  1.2113084170790043e-02  1.2435030348487475e-02  1.2749054709779472e-02  1.3055028002550694e-02
  1.3352819610168249e-02  1.3642297619515213e-02  1.3923328889550701e-02  1.4195779120396755e-02  1.4459512922951888e-02
  1.4714393889449106e-02  1.4960284695339197e-02  1.5197047339946356e-02  1.5424543482069005e-02  1.5642634785882861e-02
  1.5851183269300882e-02  1.6050051654785819e-02  1.6239103722615358e-02  1.6418204666599868e-02  1.6587221452252745e-02
  1.6746023177413381e-02  1.6894481435322680e-02  1.7032470680151242e-02  1.7159868594980098e-02  1.7276556462234062e-02
  1.7382419536567689e-02  1.7477347420203831e-02  1.7561234440724778e-02  1.7633980031316030e-02  1.7695489113462651e-02
  1.7745672482098213e-02  1.7784447193206366e-02  1.7811736953874995e-02  1.7827472514802972e-02  1.7831592065259527e-02
  1.7824041630496206e-02  1.7804775471611418e-02  1.7773756487867626e-02  1.7730956621461080e-02  1.7676357264744206e-02
  1.7609949669900548e-02  1.7531735361072359e-02  1.7441726548940748e-02  1.7339946547758452e-02  1.7226430194835204e-02
  1.7101224272475703e-02  1.6964387932370196e-02  1.6815993122437613e-02  1.6656125016121386e-02  1.6484882444137778e-02
  1.6302378328676877e-02  1.6108740120056170e-02  1.5904110235826708e-02  1.5688646502331895e-02  1.5462522598718848e-02
  1.5225928503402380e-02  1.4979070942981579e-02  1.4722173843608986e-02  1.4455478784812377e-02  1.4179245455769129e-02
  1.3893752114033217e-02  1.3599296046714787e-02  1.3296194034112337e-02  1.2984782815796765e-02  1.2665419534789502e-02
  1.2338481765134289e-02  1.2004366727556757e-02  1.1663490256994454e-02  1.1316285756747082e-02  1.0963203145015463e-02
  1.0604707793829235e-02  1.0241279460363278e-02  9.8734112106428542e-03  9.5016083356374952e-03  9.1263872597435996e-03
  8.7482744416557748e-03  8.3678052676268867e-03  7.9855229371168582e-03  7.6019773408301777e-03  7.2177239311421440e-03
  6.8333225849138432e-03  6.4493364586958365e-03  6.0663308363205970e-03  5.6848719688836593e-03  5.3055259071134999e-03
  4.9288573261301507e-03  4.5554283425925301e-03  4.1857973242345149e-03  3.8205176917897260e-03  3.4601367133050495e-03
  3.1051942908428922e-03  2.7562217395721423e-03  2.4137405592478903e-03  2.0782611980798369e-03  1.7502818089894781e-03
  1.4302869982559675e-03  1.1187465665507418e-03  8.1611424236086028e-04  5.2282640780107448e-04  2.3930081681461555e-04
 -3.4064694237264137e-05 -2.9689350359705816e-04 -5.4883150874400878e-04 -7.8954843863841904e-04 -1.0187391735772026e-03
 -1.2361250726607258e-03 -1.4414553088709216e-03 -1.6345082117606648e-03 -1.8150926177544372e-03 -1.9830492280602480e-03
 -2.1382519741928261e-03 -2.2806093911081028e-03 -2.4100659979489616e-03 -2.5266036864022346e-03 -2.6302431166670024e-03
 -2.7210451210341663e-03 -2.7991121150772540e-03 -2.8645895146006684e-03 -2.9176668794415198e-03 -2.9585773601870338e-03
 -2.9875956443245581e-03 -3.0050357088437668e-03 -3.0112485568763499e-03 -3.0066199388126534e-03 -2.9915680578952741e-03
 -2.9665412602896076e-03 -2.9320157096313516e-03 -2.8884930460509584e-03 -2.8364980296750487e-03 -2.7765761686047697e-03
 -2.7092913313711137e-03 -2.6352233438671890e-03 -2.5549655707574415e-03 -2.4691224813638327e-03 -2.3783072000289700e-03
 -2.2831390409561929e-03 -2.1842410275266086e-03 -2.0822373960930865e-03 -1.9777510842511991e-03 -1.8714012035871259e-03
 -1.7638004969025023e-03 -1.6555527799162267e-03 -1.5472503674432221e-03 -1.4394714840501460e-03 -1.3327776591880601e-03
 -1.2277111068020477e-03 -1.1247920894177925e-03 -1.0245162667051029e-03 -9.2735202851839229e-04 -8.3373781241411946e-04
 -7.4407940564517124e-04 -6.5874723163220886e-04 -5.7807362091195750e-04 -5.0235006656246673e-04 -4.3182446410530375e-04
 -3.6669833588471310e-04 -3.0712403992372647e-04 -2.5320196325723108e-04 -2.0497769974197640e-04 -1.6243921234356161e-04
 -1.2551397990034373e-04 -9.4066128364324395e-05 -6.7893546518981622e-05 -4.6724986174053032e-05 -3.0217146837275475e-05
 -1.7951744863085523e-05 -9.4325670782495473e-06 -4.0825088844742520e-06 -1.2405968379637563e-06 -1.5899570591859552e-07
  0.0000000000000000e+00
  0.0000000000000000e+00  2.4748126127473532e+02  3.7743960075555952e+02  4.2321270877151750e+02  4.1653642425022053e+02
  3.8569644479536908e+02  3.5297373187314088e+02  3.3213337034953861e+02  3.2765392359130715e+02  3.3590724999977920e+02
  3.4808901036160330e+02  3.5477424714904436e+02  3.5024598346924779e+02  3.3393478355749420e+02  3.0987199527724113e+02
  2.8473118565791088e+02  2.6462975829802286e+02  2.5254231788361810e+02  2.4807850885492098e+02  2.4831398542076735e+02
  2.4920587219659117e+02  2.4746006727587556e+02  2.4173819300685489e+02  2.3254698927276380e+02  2.2165680825100068e+02
  2.1126118697133558e+02  2.0297396756547948e+02  1.9730610271095446e+02  1.9382098961515052e+02  1.9148770621785238e+02
  1.8914287911502092e+02  1.8599600103670724e+02  1.8183795771089984e+02  1.7692730924988436e+02  1.7179540577565382e+02
  1.6700438580927838e+02  1.6290078979979759e+02  1.5953892813962474e+02  1.5675126215536542e+02  1.5425104689037758e+02
  1.5175468026482619e+02  1.4909723527146767e+02  1.4625715460510602e+02  1.4331693515815260e+02  1.4041093655140250e+02
  1.3766479103536034e+02  1.3514242892088120e+02  1.3283987732077796e+02  1.3070612908759207e+02  1.2866905256475587e+02
  1.2666469706915389e+02  1.2466076500299836e+02  1.2265705026001915e+02  1.2067481884620898e+02  1.1874415465029033e+02
  1.1688992460174100e+02  1.1512157148013232e+02  1.1343397645000556e+02  1.1181273229100211e+02  1.1024021900217353e+02
  1.0870218105933154e+02  1.0719199697323776e+02  1.0570982831419066e+02  1.0426005594720193e+02  1.0284837936754587e+02
  1.0147874039495191e+02  1.0015156690037942e+02  9.8864349524313539e+01  9.7612868384353689e+01  9.6392553198362606e+01
  9.5199882996820122e+01  9.4033069047587162e+01  9.2891715668240209e+01  9.1776237786633317e+01  9.0687219014146351e+01
  8.9624768295551561e+01  8.8588257809473689e+01  8.7576506529507199e+01  8.6588051718417518e+01  8.5621443105241113e+01
  8.4675525222995390e+01  8.3749527459824080e+01  8.2842968864028038e+01  8.1955530228006552e+01  8.1086915055597871e+01
  8.0236720762301104e+01  7.9404407693078511e+01  7.8589346039641384e+01  7.7790873761357375e+01  7.7008358115783707e+01
  7.6241248993066819e+01  7.5489086315875113e+01  7.4751476817158917e+01  7.4028066311885311e+01  7.3318509781912439e+01
  7.2622446523753368e+01  7.1939498273237490e+01  7.1269279846172765e+01  7.0611410985937923e+01  6.9965528596716823e+01
  6.9331295831043391e+01  6.8708401374954576e+01  6.8096554091029873e+01  6.7495476900964889e+01  6.6904900195381018e+01
  6.6324557079122513e+01  6.5754183700316801e+01  6.5193521413547430e+01  6.4642318990408540e+01  6.4100334762750876e+01
  6.3567337832221845e+01  6.3043107467862008e+01  6.2527431832905137e+01  6.2020106512692124e+01  6.1520932916282284e+01
  6.1029717285238377e+01  6.0546270812645993e+01  6.0070409984597916e+01  5.9601956863385496e+01  5.9140739294303032e+01
  5.8686590911441634e+01  5.8239350891498660e+01  5.7798863592709587e+01  5.7364978112463504e+01  5.6937547800531455e+01
  5.6516429986477668e+01  5.6101485965477842e+01  5.5692580985586581e+01  5.5289584187958255e+01  5.4892368506630078e+01
  5.4500810565714033e+01  5.4114790572544742e+01  5.3734192172908266e+01  5.3358902263659061e+01  5.2988810788480301e+01
  5.2623810626952462e+01  5.2263797551775639e+01  5.1908670165330392e+01  5.1558329805823128e+01  5.1212680438174552e+01
  5.0871628580084575e+01  5.0535083242715110e+01  5.0202955849254586e+01  4.9875160128693622e+01  4.9551612005942630e+01
  4.9232229542599164e+01  4.8916932896536821e+01  4.8605644264327644e+01  4.8298287804721809e+01  4.7994789560444950e+01
  4.7695077412201726e+01  4.7399081038573115e+01  4.7106731861128935e+01  4.6817962974574947e+01  4.6532709080280441e+01
  4.6250906450148058e+01  4.5972492893899542e+01  4.5697407714318132e+01  4.5425591650885806e+01  4.5156986828190320e+01
  4.4891536726519249e+01  4.4629186152171926e+01  4.4369881197788757e+01  4.4113569193700947e+01  4.3860198665958059e+01
  4.3609719312401587e+01  4.3362081977057940e+01  4.3117238616336884e+01  4.2875142258387093e+01  4.2635746969654761e+01
  4.2399007834848433e+01  4.2164880934238766e+01  4.1933323314198532e+01  4.1704292952645083e+01  4.1477748732023976e+01
  4.1253650422334452e+01  4.1031958661145552e+01  4.0812634928033091e+01  4.0595641515359588e+01  4.0380941506537063e+01
  4.0168498761594940e+01  3.9958277899703049e+01  3.9750244277083873e+01  3.9544363962397505e+01  3.9340603718939143e+01
  3.9138930991698501e+01  3.8939313891473034e+01  3.8741721175147710e+01  3.8546122224570503e+01  3.8352487032475949e+01
  3.8160786192161062e+01  3.7970990884538530e+01  3.7783072862034132e+01  3.7597004431363544e+01  3.7412758440665677e+01
  3.7230308267878563e+01  3.7049627806606182e+01  3.6870691449331588e+01  3.6693474071659274e+01  3.6517951025172557e+01
  3.6344098133162433e+01  3.6171891684455964e+01  3.6001308425066547e+01  3.5832325546897337e+01  3.5664920672309009e+01
  3.5499071835710076e+01  3.5334757462869973e+01  3.5171956348657048e+01  3.5010647645056082e+01  3.4850810872820375e+01
  3.4692425940016250e+01  3.4535473159869866e+01  3.4379933265980981e+01  3.4225787402022902e+01  3.4073017068136679e+01
  3.3921604053726135e+01  3.3771530366948262e+01  3.3622778168020737e+01  3.3475329776295879e+01  3.3329167784976825e+01
  3.3184275200954204e+01  3.3040635587653526e+01  3.2898233188335603e+01  3.2757052856573168e+01  3.2617079753411275e+01
  3.2478298995709203e+01  3.2340695294242046e+01  3.2204252655946362e+01  3.2068954596853075e+01  3.1934784872366951e+01
  3.1801728297177011e+01  3.1669771584162742e+01  3.1538903969453862e+01  3.1409116533548559e+01  3.1280400416348165e+01
  3.1152744865002454e+01  3.1026135240212930e+01  3.0900551666805903e+01  3.0775970828190857e+01  3.0652369993663264e+01
  3.0529731337944948e+01  3.0408046347111359e+01  3.0287319265829492e+01  3.0167566634976339e+01  3.0048814523192274e+01
  2.9931095529462500e+01  2.9814445723301951e+01  2.9698902079756071e+01  2.9584501616257658e+01  2.9471281350239781e+01
  3.0518003632056910e+01  3.0261807014706761e+01  3.0003502582445638e+01  2.9743107733703646e+01  2.9480644221308790e+01
  2.9216138086599301e+01  2.8949619590017228e+01  2.8681123138183274e+01  2.8410687207452852e+01  2.8138354263953403e+01
  2.7864170680102962e+01  2.7588186647609959e+01  2.7310456086954275e+01  2.7031036553349509e+01  2.6749989139186546e+01
  2.6467378372958297e+01  2.6183272114665762e+01  2.5897741447705268e+01  2.5610860567236998e+01  2.5322706665034726e+01
  2.5033359810816830e+01  2.4742902830058544e+01  2.4451421178285404e+01  2.4159002811848033e+01  2.3865738055178078e+01
  2.3571719464525426e+01  2.3277041688176684e+01  2.2981801323154887e+01  2.2686096768400425e+01  2.2390028074433260e+01
  2.2093696789496338e+01  2.1797205802180297e+01  2.1500659180529386e+01  2.1204162007628607e+01  2.0907820213672171e+01
  2.0611740404513121e+01  2.0316029686694250e+01  2.0020795488960232e+01  1.9726145380251030e+01  1.9432186884176510e+01
  1.9139027289972329e+01  1.8846773459937040e+01  1.8555531633350483e+01  1.8265407226873364e+01  1.7976504631428131e+01
  1.7688927005561037e+01  1.7402776065285533e+01  1.7118151870406781e+01  1.6835152607327558e+01  1.6553874368335261e+01
  1.6274410927370266e+01  1.5996853512275459e+01  1.5721290573527067e+01  1.5447807549446672e+01  1.5176486627926961e+01
  1.4907406517832126e+01  1.4640642327751770e+01  1.4376265570152016e+01  1.4114344187851874e+01  1.3854942582428846e+01
  1.3598121644417541e+01  1.3343938785301283e+01  1.3092447971296755e+01  1.2843699758931642e+01  1.2597741332415284e+01
  1.2354616542802352e+01  1.2114365948949537e+01  1.1877026860265229e+01  1.1642633381252244e+01  1.1411216457843521e+01
  1.1182803925530887e+01  1.0957420559286769e+01  1.0735088125278972e+01  1.0515825434378442e+01  1.0299648397460050e+01
  1.0086570082496383e+01  9.8766007734445616e+00  9.6697480309260406e+00  9.4660167546994654e+00  9.2654092479264936e+00
  9.0679252832306645e+00  8.8735621705492669e+00  8.6823148267782191e+00  8.4941758472099558e+00  8.3091355787643622e+00
  8.1271821950126402e+00  7.9483017729942933e+00  7.7724783718270398e+00  7.5996941131097842e+00  7.4299292631185692e+00
  7.2631623167955741e+00  7.0993700835310936e+00  6.9385277747385530e+00  6.7806090932225223e+00  6.6255863243397428e+00
  6.4734304289531828e+00  6.3241111381790747e+00  6.1775970499269963e+00  6.0338557272329441e+00  5.8928537983854339e+00
  5.7545570588445907e+00  5.6189305749542839e+00  5.4859387894472391e+00  5.3555456287431999e+00  5.2277146120400557e+00
  5.1024089621980462e+00  4.9795917184168932e+00  4.8592258507060402e+00  4.7412743757140650e+00  4.6257004561848030e+00
  4.5124674408176215e+00  4.4015388729364924e+00  4.2928784972492897e+00  4.1864502665145658e+00  4.0822183481158403e+00
  3.9801471305434113e+00  3.8802012297836903e+00  3.7823454956160547e+00  3.6865450178172225e+00  3.5927651322731515e+00
  3.5009714269984507e+00  3.4111297480633249e+00  3.3232062054280287e+00  3.2371671786848486e+00  3.1529793227076026e+00
  3.0706095732086647e+00  2.9900251522035055e+00  2.9111935733827563e+00  2.8340826473917953e+00  2.7586604870178530e+00
  2.6848955122846383e+00  2.6127564554544871e+00  2.5422123659380307e+00  2.4732326151113866e+00  2.4057869010408686e+00
  2.3398452531152181e+00  2.2753780365853586e+00  2.2123559570116678e+00  2.1507500646187721e+00  2.0905317585578662e+00
  2.0316727910765451e+00  1.9741452715961616e+00  1.9179216706967119e+00  1.8629748240092272e+00  1.8092779360156988e+00
  1.7568045837565185e+00  1.7055287204454421e+00  1.6554246789920732e+00  1.6064671754318669e+00  1.5586313122636541e+00
  1.5118925816946918e+00  1.4662268687932289e+00  1.4216104545485946e+00  1.3780200188388056e+00  1.3354326433057031e+00
  1.2938258141375989e+00  1.2531774247594480e+00  1.2134657784305471e+00  1.1746695907497413e+00  1.1367679920681693e+00
  1.0997405298095106e+00  1.0635671706976926e+00  1.0282283027521575e+00  9.9370473553256122e-01  9.5997769780385989e-01
  9.2702883449606899e-01  8.9484020349430604e-01  8.6339427226651511e-01  8.3267391432886928e-01  8.0266240554885493e-01
  7.7334342028603487e-01  7.4470102737049237e-01  7.1671968591895385e-01  6.8938424098859308e-01  6.6267991906851476e-01
  6.3659232340891725e-01  6.1110742918793715e-01  5.8621157851617212e-01  5.6189147527888439e-01  5.3813417981588485e-01
  5.1492710343909598e-01  4.9225800278779558e-01  4.7011497402154051e-01  4.4848644685076988e-01  4.2736117840508886e-01
  4.0672824693923182e-01  3.8657704537670656e-01  3.6689727469111683e-01  3.4767893712516695e-01  3.2891232924734443e-01
  3.1058803484628394e-01  2.9269691766281081e-01  2.7523011395966435e-01  2.5817902492890188e-01  2.4153530893698180e-01
  2.2529087360752678e-01  2.0943786774176840e-01  1.9396867307666954e-01  1.7887589588072833e-01  1.6415235838746234e-01
  1.4979109006657063e-01  1.3578531873277874e-01  1.2212846149236156e-01  1.0881411552734684e-01  9.5836048717398509e-02
  8.3188190099380749e-02  7.0864620164601419e-02  5.8859560993734947e-02  4.7167366229427014e-02  3.5782510886576434e-02
  2.4699581000300667e-02  1.3913263111577605e-02  3.4183335905703105e-03 -6.7903522023704619e-03 -1.6717870918021793e-02
 -2.6369242363582984e-02 -3.5749439456713328e-02 -4.4863392252860464e-02 -5.3715987935118219e-02 -6.2312070469691158e-02
 -7.0656440270749243e-02 -7.8753853874859184e-02 -8.6609023624992523e-02 -9.4226617364110324e-02 -1.0161125813832479e-01
 -1.0876752390963738e-01 -1.1569994727825367e-01 -1.2241301521447508e-01 -1.2891116880016712e-01 -1.3519880297980441e-01
 -1.4128026632109250e-01 -1.4715986078516627e-01 -1.5284184150636507e-01 -1.5833041658158470e-01 -1.6362974686920581e-01
 -1.6874394579759938e-01 -1.7367707918320865e-01 -1.7843316505820778e-01 -1.8301617350773738e-01 -1.8743002651671661e-01
 -1.9167859782623181e-01 -1.9576571279950256e-01 -1.9969514829742330e-01 -2.0347063256368278e-01 -2.0709584511945964e-01
 -2.1057441666769469e-01 -2.1390992900694003e-01 -2.1710591495478504e-01 -2.2016585828085850e-01 -2.2309319364940844e-01
 -2.2589130657145753e-01 -2.2856353336653590e-01 -2.3111316113399066e-01 -2.3354342773387168e-01 -2.3585752177739480e-01
 -2.3805858262698076e-01 -2.4014970040587194e-01 -2.4213391601732492e-01 -2.4401422117338020e-01 -2.4579355843320852e-01
 -2.4747482125103404e-01 -2.4906085403363387e-01 -2.5055445220741479e-01 -2.5195836229506607e-01 -2.5327528200178950e-01
 -2.5450786031110634e-01 -2.5565869759024007e-01 -2.5673034570507675e-01 -2.5772530814470135e-01 -2.5864604015443515e-01
 -2.5949494885990648e-01 -2.6027439336455294e-01 -2.6098668484532922e-01 -2.6163408665697235e-01 -2.6221881444507616e-01
 -2.6274303626797707e-01 -2.6320887272744997e-01 -2.6361839710821489e-01 -2.6397363552625397e-01 -2.6427656708593894e-01
 -2.6452912404596912e-01 -2.6473319199412021e-01 -2.6489061003080316e-01 -2.6500317096143355e-01 -2.6507262149761207e-01
 -2.6510066246711483e-01 -2.6508894903269437e-01 -2.6503909091969130e-01 -2.6495265265245660e-01 -2.6483115379958383e-01
 -2.6467606922795250e-01 -2.6448882936558149e-01 -2.6427082047329326e-01 -2.6402338492518845e-01 -2.6374782149793097e-01
 -2.6344538566884351e-01 -2.6311728992281386e-01 -2.6276470406801128e-01 -2.6238875556041402e-01 -2.6199052983714644e-01
 -2.6157107065862756e-01 -2.6113138045952955e-01 -2.6067242070854690e-01 -2.6019511227697600e-01 -2.5970033581610541e-01
 -2.5918893214341637e-01 -2.5866170263759419e-01 -2.5811940964234981e-01 -2.5756277687905182e-01 -2.5699248986816953e-01
 -2.5640919635952564e-01 -2.5581350677136033e-01 -2.5520599463820542e-01 -2.5458719706756888e-01 -2.5395761520543020e-01
 -2.5331771471054593e-01 -2.5266792623756612e-01 -2.5200864592896094e-01 -2.5134023591575788e-01 -2.5066302482708941e-01
 -2.4997730830855142e-01 -2.4928334954937173e-01 -2.4858137981853873e-01 -2.4787159903235281e-01 -2.4715417646827112e-01
 -2.4642925160985768e-01 -2.4569693501793446e-01 -2.4495730921366071e-01 -2.4421042957350583e-01 -2.4345632523611474e-01
 -2.4269500002106684e-01 -2.4192643335952779e-01 -2.4115058123679445e-01 -2.4036737714673295e-01 -2.3957673305810989e-01
 -2.3877854039281646e-01 -2.3797267101598574e-01 -2.3715897823800330e-01 -2.3633729782841048e-01 -2.3550744904170121e-01
 -2.3466923565501147e-01 -2.3382244701770219e-01 -2.3296685911283518e-01 -2.3210223563054203e-01 -2.3122832905328616e-01
 -2.3034488175301798e-01 -2.2945162710022324e-01 -2.2854829058486412e-01 -2.2763459094921401e-01 -2.2671024133258461e-01
 -2.2577495042794699e-01 -2.2482842365044495e-01 -2.2387036431780200e-01 -2.2290047484262121e-01 -2.2191845793657822e-01
 -2.2092401782650720e-01 -2.1991686148238018e-01 -2.1889669985717924e-01 -2.1786324913866184e-01 -2.1681623201301933e-01
 -2.1575537894042840e-01 -2.1468042944249577e-01 -2.1359113340159605e-01 -2.1248725237210220e-01 -2.1136856090350981e-01
 -2.1023484787545391e-01 -2.0908591784461908e-01 -2.0792159240354274e-01 -2.0674171155131127e-01 -2.0554613507614947e-01
 -2.0433474394990309e-01 -2.0310744173441425e-01 -2.0186415599979021e-01 -2.0060483975456500e-01 -1.9932947288775432e-01
 -1.9803806362280349e-01 -1.9673064996480807e-01 -1.9540730067454629e-01 -1.9406811501671539e-01 -1.9271322201701380e-01
 -1.9134277969113930e-01 -1.8995697426426339e-01 -1.8855601938098299e-01 -1.8714015530574837e-01 -1.8570964811376794e-01
 -1.8426478887238984e-01 -1.8280589281295997e-01 -1.8133329849315705e-01 -1.7984736694980394e-01 -1.7834848084215629e-01
 -1.7683704358566710e-01 -1.7531347847622877e-01 -1.7377822780489119e-01 -1.7223175196305698e-01 -1.7067452853815321e-01
 -1.6910705139977975e-01 -1.6752982977633474e-01 -1.6594338732211605e-01 -1.6434826117490026e-01 -1.6274500100399744e-01
 -1.6113416804878361e-01 -1.5951633414770910e-01 -1.5789208075778391e-01 -1.5626199796453982e-01 -1.5462668348246922e-01
 -1.5298674164594037e-01 -1.5134278239058971e-01 -1.4969542022519064e-01 -1.4804527319399907e-01 -1.4639296182957562e-01
 -1.4473910809608465e-01 -1.4308433432306983e-01 -1.4142926212970647e-01 -1.3977451133953059e-01 -1.3812069888564460e-01
 -1.3646843770639985e-01 -1.3481833563155557e-01 -1.3317099425891474e-01 -1.3152700782143686e-01 -1.2988696204482691e-01
 -1.2825143299560138e-01 -1.2662098591963075e-01 -1.2499617407115901e-01 -1.2337753753229949e-01 -1.2176560202300768e-01
 -1.2016087770153067e-01 -1.1856385795533313e-01 -1.1697501818250026e-01 -1.1539481456361718e-01 -1.1382368282431819e-01
 -1.1226203706667669e-01 -1.1071026924759299e-01 -1.0916874940273559e-01 -1.0763782599774512e-01 -1.0611782628487827e-01
 -1.0460905666427996e-01 -1.0311180304988342e-01 -1.0162633123993883e-01 -1.0015288729216959e-01 -9.8691697903557127e-02
 -9.7242970794753664e-02 -9.5806895099123143e-02 -9.4383641756410355e-02 -9.2973363911038137e-02 -9.1576197315032692e-02
 -9.0192260735577207e-02 -8.8821656367193386e-02 -8.7464470248551335e-02 -8.6120772683907401e-02 -8.4790618669170315e-02
 -8.3474048322595334e-02 -8.2171087320106709e-02 -8.0881747335247958e-02 -7.9606026483760778e-02 -7.8343909772791584e-02
 -7.7095369554726553e-02 -7.5860365985654613e-02 -7.4638847488458671e-02 -7.3430751220534940e-02 -7.2236003546140404e-02
 -7.1054520513368427e-02 -6.9886208335752570e-02 -6.8730963878498363e-02 -6.7588675149343511e-02 -6.6459221794045911e-02
 -6.5342475596500069e-02 -6.4238300983481544e-02 -6.3146555534019530e-02 -6.2067090493397585e-02 -6.0999751291782534e-02
 -5.9944378067481520e-02 -5.8900806194827085e-02 -5.7868866816690560e-02 -5.6848387381623462e-02 -5.5839192185627072e-02
 -5.4841102918550190e-02 -5.3853939215114985e-02 -5.2877519210570989e-02 -5.1911660100977280e-02 -5.0956178708112726e-02
 -5.0010892049014433e-02 -4.9075617910144309e-02 -4.8150175426183821e-02 -4.7234385661274962e-02 -4.6328072103661702e-02
 -4.5431060857846720e-02 -4.4543180679561971e-02 -4.3664263001568240e-02 -4.2794141959450409e-02 -4.1932654417408920e-02
 -4.1079639994047283e-02 -4.0234941088155812e-02 -3.9398402904491307e-02 -3.8569873479552971e-02 -3.7749203707354420e-02
 -3.6936247365191764e-02 -3.6130861139407812e-02 -3.5332904651152429e-02 -3.4542240482138935e-02 -3.3758734200396698e-02
 -3.2982254386019753e-02 -3.2212672656911606e-02 -3.1449863694526098e-02 -3.0693705269604389e-02 -2.9944078267908097e-02
 -2.9200866715948508e-02 -2.8463957806711859e-02 -2.7733241925380847e-02 -2.7008612675052140e-02 -2.6289966902450033e-02
 -2.5577204723636265e-02 -2.4870229549715843e-02 -2.4168948112539109e-02 -2.3473270490399788e-02 -2.2783110133729252e-02
 -2.2098383890786825e-02 -2.1419012033346237e-02 -2.0744918282378167e-02 -2.0076029833728939e-02 -1.9412277383795268e-02
 -1.8753595155195160e-02 -1.8099920922434919e-02 -1.7451196037572239e-02 -1.6807365455875460e-02 -1.6168377761478864e-02
 -1.5534185193034161e-02 -1.4904743669358003e-02 -1.4280012815075698e-02 -1.3659955986260953e-02 -1.3044540296071785e-02
 -1.2433736640382533e-02 -1.1827519723411927e-02 -1.1225868083347391e-02 -1.0628764117965301e-02 -1.0036194110247488e-02
 -9.4481482539937791e-03 -8.8646206794295770e-03 -8.2856094768083040e-03 -7.7111166963414329e-03 -7.1411483128188923e-03
 -6.5757141819101613e-03 -6.0148279958326945e-03 -5.4585072384936142e-03 -4.9067731401047062e-03 -4.3596506312707098e-03
 -3.8171682965508990e-03 -3.2793583274939491e-03 -2.7462564751461042e-03 -2.2179020020326361e-03 -1.6943376336125925e-03
 -1.1756095092068342e-03 -6.6176713239937473e-04 -1.5286332091201001e-04  3.5104584404777647e-04  8.4990106896558522e-04
  1.3436398997256046e-03  1.8321967738428226e-03  2.3155030732219229e-03  2.7934871774429114e-03  3.2660745175734423e-03
  3.7331876305078575e-03  4.1947462138329167e-03  4.6506671812202548e-03  5.1008647183455359e-03  5.5452503393343174e-03
  5.9837329437346289e-03  6.4162188740162383e-03  6.8426119735966436e-03  7.2628136453937869e-03  7.6767229109054192e-03
  8.0842364698152439e-03  8.4852487601257236e-03  8.8796520188175899e-03  9.2673363430361005e-03  9.6481897518039591e-03
  1.0022098248260988e-02  1.0388945882430441e-02  1.0748614814512121e-02  1.1100985378702103e-02  1.1445936147539242e-02
  1.1783343996778333e-02  1.2113084170790043e-02  1.2435030348487475e-02  1.2749054709779472e-02  1.3055028002550694e-02
  1.3352819610168249e-02  1.3642297619515213e-02  1.3923328889550701e-02  1.4195779120396755e-02  1.4459512922951888e-02
  1.4714393889449106e-02  1.4960284695339197e-02  1.5197047339946356e-02  1.5424543482069005e-02  1.5642634785882861e-02
  1.5851183269300882e-02  1.6050051654785819e-02  1.6239103722615358e-02  1.6418204666599868e-02  1.6587221452252745e-02
  1.6746023177413381e-02  1.6894481435322680e-02  1.7032470680151242e-02  1.7159868594980098e-02  1.7276556462234062e-02
  1.7382419536567689e-02  1.7477347420203831e-02  1.7561234440724778e-02  1.7633980031316030e-02  1.7695489113462651e-02
  1.7745672482098213e-02  1.7784447193206366e-02  1.7811736953874995e-02  1.7827472514802972e-02  1.7831592065259527e-02
  1.7824041630496206e-02  1.7804775471611418e-02  1.7773756487867626e-02  1.7730956621461080e-02  1.7676357264744206e-02
  1.7609949669900548e-02  1.7531735361072359e-02  1.7441726548940748e-02  1.7339946547758452e-02  1.7226430194835204e-02
  1.7101224272475703e-02  1.6964387932370196e-02  1.6815993122437613e-02  1.6656125016121386e-02  1.6484882444137778e-02
  1.6302378328676877e-02  1.6108740120056170e-02  1.5904110235826708e-02  1.5688646502331895e-02  1.5462522598718848e-02
  1.5225928503402380e-02  1.4979070942981579e-02  1.4722173843608986e-02  1.4455478784812377e-02  1.4179245455769129e-02
  1.3893752114033217e-02  1.3599296046714787e-02  1.3296194034112337e-02  1.2984782815796765e-02  1.2665419534789502e-02
  1.2338481765134289e-02  1.2004366727556757e-02  1.1663490256994454e-02  1.1316285756747082e-02  1.0963203145015463e-02
  1.0604707793829235e-02  1.0241279460363278e-02  9.8734112106428542e-03  9.5016083356374952e-03  9.1263872597435996e-03
  8.7482744416557748e-03  8.3678052676268867e-03  7.9855229371168582e-03  7.6019773408301777e-03  7.2177239311421440e-03
  6.8333225849138432e-03  6.4493364586958365e-03  6.0663308363205970e-03  5.6848719688836593e-03  5.3055259071134999e-03
  4.9288573261301507e-03  4.5554283425925301e-03  4.1857973242345149e-03  3.8205176917897260e-03  3.4601367133050495e-03
  3.1051942908428922e-03  2.7562217395721423e-03  2.4137405592478903e-03  2.0782611980798369e-03  1.7502818089894781e-03
  1.4302869982559675e-03  1.1187465665507418e-03  8.1611424236086028e-04  5.2282640780107448e-04  2.3930081681461555e-04
 -3.4064694237264137e-05 -2.9689350359705816e-04 -5.4883150874400878e-04 -7.8954843863841904e-04 -1.0187391735772026e-03
 -1.2361250726607258e-03 -1.4414553088709216e-03 -1.6345082117606648e-03 -1.8150926177544372e-03 -1.9830492280602480e-03
 -2.1382519741928261e-03 -2.2806093911081028e-03 -2.4100659979489616e-03 -2.5266036864022346e-03 -2.6302431166670024e-03
 -2.7210451210341663e-03 -2.7991121150772540e-03 -2.8645895146006684e-03 -2.9176668794415198e-03 -2.9585773601870338e-03
 -2.9875956443245581e-03 -3.0050357088437668e-03 -3.0112485568763499e-03 -3.0066199388126534e-03 -2.9915680578952741e-03
 -2.9665412602896076e-03 -2.9320157096313516e-03 -2.8884930460509584e-03 -2.8364980296750487e-03 -2.7765761686047697e-03
 -2.7092913313711137e-03 -2.6352233438671890e-03 -2.5549655707574415e-03 -2.4691224813638327e-03 -2.3783072000289700e-03
 -2.2831390409561929e-03 -2.1842410275266086e-03 -2.0822373960930865e-03 -1.9777510842511991e-03 -1.8714012035871259e-03
 -1.7638004969025023e-03 -1.6555527799162267e-03 -1.5472503674432221e-03 -1.4394714840501460e-03 -1.3327776591880601e-03
 -1.2277111068020477e-03 -1.1247920894177925e-03 -1.0245162667051029e-03 -9.2735202851839229e-04 -8.3373781241411946e-04
 -7.4407940564517124e-04 -6.5874723163220886e-04 -5.7807362091195750e-04 -5.0235006656246673e-04 -4.3182446410530375e-04
 -3.6669833588471310e-04 -3.0712403992372647e-04 -2.5320196325723108e-04 -2.0497769974197640e-04 -1.6243921234356161e-04
 -1.2551397990034373e-04 -9.4066128364324395e-05 -6.7893546518981622e-05 -4.6724986174053032e-05 -3.0217146837275475e-05
 -1.7951744863085523e-05 -9.4325670782495473e-06 -4.0825088844742520e-06 -1.2405968379637563e-06 -1.5899570591859552e-07
  0.0000000000000000e+00
  0.0000000000000000e+00  2.4748126127473532e+02  3.7743960075555952e+02  4.2321270877151750e+02  4.1653642425022053e+02
  3.8569644479536908e+02  3.5297373187314088e+02  3.3213337034953861e+02  3.2765392359130715e+02  3.3590724999977920e+02
  3.4808901036160330e+02  3.5477424714904436e+02  3.5024598346924779e+02  3.3393478355749420e+02  3.0987199527724113e+02
  2.8473118565791088e+02  2.6462975829802286e+02  2.5254231788361810e+02  2.4807850885492098e+02  2.4831398542076735e+02
  2.4920587219659117e+02  2.4746006727587556e+02  2.4173819300685489e+02  2.3254698927276380e+02  2.2165680825100068e+02
  2.1126118697133558e+02  2.0297396756547948e+02  1.9730610271095446e+02  1.9382098961515052e+02  1.9148770621785238e+02
  1.8914287911502092e+02  1.8599600103670724e+02  1.8183795771089984e+02  1.7692730924988436e+02  1.7179540577565382e+02
  1.6700438580927838e+02  1.6290078979979759e+02  1.5953892813962474e+02  1.5675126215536542e+02  1.5425104689037758e+02
  1.5175468026482619e+02  1.4909723527146767e+02  1.4625715460510602e+02  1.4331693515815260e+02  1.4041093655140250e+02
  1.3766479103536034e+02  1.3514242892088120e+02  1.3283987732077796e+02  1.3070612908759207e+02  1.2866905256475587e+02
  1.2666469706915389e+02  1.2466076500299836e+02  1.2265705026001915e+02  1.2067481884620898e+02  1.1874415465029033e+02
  1.1688992460174100e+02  1.1512157148013232e+02  1.1343397645000556e+02  1.1181273229100211e+02  1.1024021900217353e+02
  1.0870218105933154e+02  1.0719199697323776e+02  1.0570982831419066e+02  1.0426005594720193e+02  1.0284837936754587e+02
  1.0147874039495191e+02  1.0015156690037942e+02  9.8864349524313539e+01  9.7612868384353689e+01  9.6392553198362606e+01
  9.5199882996820122e+01  9.4033069047587162e+01  9.2891715668240209e+01  9.1776237786633317e+01  9.0687219014146351e+01
  8.9624768295551561e+01  8.8588257809473689e+01  8.7576506529507199e+01  8.6588051718417518e+01  8.5621443105241113e+01
  8.4675525222995390e+01  8.3749527459824080e+01  8.2842968864028038e+01  8.1955530228006552e+01  8.1086915055597871e+01
  8.0236720762301104e+01  7.9404407693078511e+01  7.8589346039641384e+01  7.7790873761357375e+01  7.7008358115783707e+01
  7.6241248993066819e+01  7.5489086315875113e+01  7.4751476817158917e+01  7.4028066311885311e+01  7.3318509781912439e+01
  7.2622446523753368e+01  7.1939498273237490e+01  7.1269279846172765e+01  7.0611410985937923e+01  6.9965528596716823e+01
  6.9331295831043391e+01  6.8708401374954576e+01  6.8096554091029873e+01  6.7495476900964889e+01  6.6904900195381018e+01
  6.6324557079122513e+01  6.5754183700316801e+01  6.5193521413547430e+01  6.4642318990408540e+01  6.4100334762750876e+01
  6.3567337832221845e+01  6.3043107467862008e+01  6.2527431832905137e+01  6.2020106512692124e+01  6.1520932916282284e+01
  6.1029717285238377e+01  6.0546270812645993e+01  6.0070409984597916e+01  5.9601956863385496e+01  5.9140739294303032e+01
  5.8686590911441634e+01  5.8239350891498660e+01  5.7798863592709587e+01  5.7364978112463504e+01  5.6937547800531455e+01
  5.6516429986477668e+01  5.6101485965477842e+01  5.5692580985586581e+01  5.5289584187958255e+01  5.4892368506630078e+01
  5.4500810565714033e+01  5.4114790572544742e+01  5.3734192172908266e+01  5.3358902263659061e+01  5.2988810788480301e+01
  5.2623810626952462e+01  5.2263797551775639e+01  5.1908670165330392e+01  5.1558329805823128e+01  5.1212680438174552e+01
  5.0871628580084575e+01  5.0535083242715110e+01  5.0202955849254586e+01  4.9875160128693622e+01  4.9551612005942630e+01
  4.9232229542599164e+01  4.8916932896536821e+01  4.8605644264327644e+01  4.8298287804721809e+01  4.7994789560444950e+01
  4.7695077412201726e+01  4.7399081038573115e+01  4.7106731861128935e+01  4.6817962974574947e+01  4.6532709080280441e+01
  4.6250906450148058e+01  4.5972492893899542e+01  4.5697407714318132e+01  4.5425591650885806e+01  4.5156986828190320e+01
  4.4891536726519249e+01  4.4629186152171926e+01  4.4369881197788757e+01  4.4113569193700947e+01  4.3860198665958059e+01
  4.3609719312401587e+01  4.3362081977057940e+01  4.3117238616336884e+01  4.2875142258387093e+01  4.2635746969654761e+01
  4.2399007834848433e+01  4.2164880934238766e+01  4.1933323314198532e+01  4.1704292952645083e+01  4.1477748732023976e+01
  4.1253650422334452e+01  4.1031958661145552e+01  4.0812634928033091e+01  4.0595641515359588e+01  4.0380941506537063e+01
  4.0168498761594940e+01  3.9958277899703049e+01  3.9750244277083873e+01  3.9544363962397505e+01  3.9340603718939143e+01
  3.9138930991698501e+01  3.8939313891473034e+01  3.8741721175147710e+01  3.8546122224570503e+01  3.8352487032475949e+01
  3.8160786192161062e+01  3.7970990884538530e+01  3.7783072862034132e+01  3.7597004431363544e+01  3.7412758440665677e+01
  3.7230308267878563e+01  3.7049627806606182e+01  3.6870691449331588e+01  3.6693474071659274e+01  3.6517951025172557e+01
  3.6344098133162433e+01  3.6171891684455964e+01  3.6001308425066547e+01  3.5832325546897337e+01  3.5664920672309009e+01
  3.5499071835710076e+01  3.5334757462869973e+01  3.5171956348657048e+01  3.5010647645056082e+01  3.4850810872820375e+01
  3.4692425940016250e+01  3.4535473159869866e+01  3.4379933265980981e+01  3.4225787402022902e+01  3.4073017068136679e+01
  3.3921604053726135e+01  3.3771530366948262e+01  3.3622778168020737e+01  3.3475329776295879e+01  3.3329167784976825e+01
  3.3184275200954204e+01  3.3040635587653526e+01  3.2898233188335603e+01  3.2757052856573168e+01  3.2617079753411275e+01
  3.2478298995709203e+01  3.2340695294242046e+01  3.2204252655946362e+01  3.2068954596853075e+01  3.1934784872366951e+01
  3.1801728297177011e+01  3.1669771584162742e+01  3.1538903969453862e+01  3.1409116533548559e+01  3.1280400416348165e+01
  3.1152744865002454e+01  3.1026135240212930e+01  3.0900551666805903e+01  3.0775970828190857e+01  3.0652369993663264e+01
  3.0529731337944948e+01  3.0408046347111359e+01  3.0287319265829492e+01  3.0167566634976339e+01  3.0048814523192274e+01
  2.9931095529462500e+01  2.9814445723301951e+01  2.9698902079756071e+01  2.9584501616257658e+01  2.9471281350239781e+01
  3.0518003632056910e+01  3.0261807014706761e+01  3.0003502582445638e+01  2.9743107733703646e+01  2.9480644221308790e+01
  2.9216138086599301e+01  2.8949619590017228e+01  2.8681123138183274e+01  2.8410687207452852e+01  2.8138354263953403e+01
  2.7864170680102962e+01  2.7588186647609959e+01  2.7310456086954275e+01  2.7031036553349509e+01  2.6749989139186546e+01
  2.6467378372958297e+01  2.6183272114665762e+01  2.5897741447705268e+01  2.5610860567236998e+01  2.5322706665034726e+01
  2.5033359810816830e+01  2.4742902830058544e+01  2.4451421178285404e+01  2.4159002811848033e+01  2.3865738055178078e+01
  2.3571719464525426e+01  2.3277041688176684e+01  2.2981801323154887e+01  2.2686096768400425e+01  2.2390028074433260e+01
  2.2093696789496338e+01  2.1797205802180297e+01  2.1500659180529386e+01  2.1204162007628607e+01  2.0907820213672171e+01
  2.0611740404513121e+01  2.0316029686694250e+01  2.0020795488960232e+01  1.9726145380251030e+01  1.9432186884176510e+01
  1.9139027289972329e+01  1.8846773459937040e+01  1.8555531633350483e+01  1.8265407226873364e+01  1.7976504631428131e+01
  1.7688927005561037e+01  1.7402776065285533e+01  1.7118151870406781e+01  1.6835152607327558e+01  1.6553874368335261e+01
  1.6274410927370266e+01  1.5996853512275459e+01  1.5721290573527067e+01  1.5447807549446672e+01  1.5176486627926961e+01
  1.4907406517832126e+01  1.4640642327751770e+01  1.4376265570152016e+01  1.4114344187851874e+01  1.3854942582428846e+01
  1.3598121644417541e+01  1.3343938785301283e+01  1.3092447971296755e+01  1.2843699758931642e+01  1.2597741332415284e+01
  1.2354616542802352e+01  1.2114365948949537e+01  1.1877026860265229e+01  1.1642633381252244e+01  1.1411216457843521e+01
  1.1182803925530887e+01  1.0957420559286769e+01  1.0735088125278972e+01  1.0515825434378442e+01  1.0299648397460050e+01
  1.0086570082496383e+01  9.8766007734445616e+00  9.6697480309260406e+00  9.4660167546994654e+00  9.2654092479264936e+00
  9.0679252832306645e+00  8.8735621705492669e+00  8.6823148267782191e+00  8.4941758472099558e+00  8.3091355787643622e+00
  8.1271821950126402e+00  7.9483017729942933e+00  7.7724783718270398e+00  7.5996941131097842e+00  7.4299292631185692e+00
  7.2631623167955741e+00  7.0993700835310936e+00  6.9385277747385530e+00  6.7806090932225223e+00  6.6255863243397428e+00
  6.4734304289531828e+00  6.3241111381790747e+00  6.1775970499269963e+00  6.0338557272329441e+00  5.8928537983854339e+00
  5.7545570588445907e+00  5.6189305749542839e+00  5.4859387894472391e+00  5.3555456287431999e+00  5.2277146120400557e+00
  5.1024089621980462e+00  4.9795917184168932e+00  4.8592258507060402e+00  4.7412743757140650e+00  4.6257004561848030e+00
  4.5124674408176215e+00  4.4015388729364924e+00  4.2928784972492897e+00  4.1864502665145658e+00  4.0822183481158403e+00
  3.9801471305434113e+00  3.8802012297836903e+00  3.7823454956160547e+00  3.6865450178172225e+00  3.5927651322731515e+00
  3.5009714269984507e+00  3.4111297480633249e+00  3.3232062054280287e+00  3.2371671786848486e+00  3.1529793227076026e+00
  3.0706095732086647e+00  2.9900251522035055e+00  2.9111935733827563e+00  2.8340826473917953e+00  2.7586604870178530e+00
  2.6848955122846383e+00  2.6127564554544871e+00  2.5422123659380307e+00  2.4732326151113866e+00  2.4057869010408686e+00
  2.3398452531152181e+00  2.2753780365853586e+00  2.2123559570116678e+00  2.1507500646187721e+00  2.0905317585578662e+00
  2.0316727910765451e+00  1.9741452715961616e+00  1.9179216706967119e+00  1.8629748240092272e+00  1.8092779360156988e+00
  1.7568045837565185e+00  1.7055287204454421e+00  1.6554246789920732e+00  1.6064671754318669e+00  1.5586313122636541e+00
  1.5118925816946918e+00  1.4662268687932289e+00  1.4216104545485946e+00  1.3780200188388056e+00  1.3354326433057031e+00
  1.2938258141375989e+00  1.2531774247594480e+00  1.2134657784305471e+00  1.1746695907497413e+00  1.1367679920681693e+00
  1.0997405298095106e+00  1.0635671706976926e+00  1.0282283027521575e+00  9.9370473553256122e-01  9.5997769780385989e-01
  9.2702883449606899e-01  8.9484020349430604e-01  8.6339427226651511e-01  8.3267391432886928e-01  8.0266240554885493e-01
  7.7334342028603487e-01  7.4470102737049237e-01  7.1671968591895385e-01  6.8938424098859308e-01  6.6267991906851476e-01
  6.3659232340891725e-01  6.1110742918793715e-01  5.8621157851617212e-01  5.6189147527888439e-01  5.3813417981588485e-01
  5.1492710343909598e-01  4.9225800278779558e-01  4.7011497402154051e-01  4.4848644685076988e-01  4.2736117840508886e-01
  4.0672824693923182e-01  3.8657704537670656e-01  3.6689727469111683e-01  3.4767893712516695e-01  3.2891232924734443e-01
  3.1058803484628394e-01  2.9269691766281081e-01  2.7523011395966435e-01  2.5817902492890188e-01  2.4153530893698180e-01
  2.2529087360752678e-01  2.0943786774176840e-01  1.9396867307666954e-01  1.7887589588072833e-01  1.6415235838746234e-01
  1.4979109006657063e-01  1.3578531873277874e-01  1.2212846149236156e-01  1.0881411552734684e-01  9.5836048717398509e-02
  8.3188190099380749e-02  7.0864620164601419e-02  5.8859560993734947e-02  4.7167366229427014e-02  3.5782510886576434e-02
  2.4699581000300667e-02  1.3913263111577605e-02  3.4183335905703105e-03 -6.7903522023704619e-03 -1.6717870918021793e-02
 -2.6369242363582984e-02 -3.5749439456713328e-02 -4.4863392252860464e-02 -5.3715987935118219e-02 -6.2312070469691158e-02
 -7.0656440270749243e-02 -7.8753853874859184e-02 -8.6609023624992523e-02 -9.4226617364110324e-02 -1.0161125813832479e-01
 -1.0876752390963738e-01 -1.1569994727825367e-01 -1.2241301521447508e-01 -1.2891116880016712e-01 -1.3519880297980441e-01
 -1.4128026632109250e-01 -1.4715986078516627e-01 -1.5284184150636507e-01 -1.5833041658158470e-01 -1.6362974686920581e-01
 -1.6874394579759938e-01 -1.7367707918320865e-01 -1.7843316505820778e-01 -1.8301617350773738e-01 -1.8743002651671661e-01
 -1.9167859782623181e-01 -1.9576571279950256e-01 -1.9969514829742330e-01 -2.0347063256368278e-01 -2.0709584511945964e-01
 -2.1057441666769469e-01 -2.1390992900694003e-01 -2.1710591495478504e-01 -2.2016585828085850e-01 -2.2309319364940844e-01
 -2.2589130657145753e-01 -2.2856353336653590e-01 -2.3111316113399066e-01 -2.3354342773387168e-01 -2.3585752177739480e-01
 -2.3805858262698076e-01 -2.4014970040587194e-01 -2.4213391601732492e-01 -2.4401422117338020e-01 -2.4579355843320852e-01
 -2.4747482125103404e-01 -2.4906085403363387e-01 -2.5055445220741479e-01 -2.5195836229506607e-01 -2.5327528200178950e-01
 -2.5450786031110634e-01 -2.5565869759024007e-01 -2.5673034570507675e-01 -2.5772530814470135e-01 -2.5864604015443515e-01
 -2.5949494885990648e-01 -2.6027439336455294e-01 -2.6098668484532922e-01 -2.6163408665697235e-01 -2.6221881444507616e-01
 -2.6274303626797707e-01 -2.6320887272744997e-01 -2.6361839710821489e-01 -2.6397363552625397e-01 -2.6427656708593894e-01
 -2.6452912404596912e-01 -2.6473319199412021e-01 -2.6489061003080316e-01 -2.6500317096143355e-01 -2.6507262149761207e-01
 -2.6510066246711483e-01 -2.6508894903269437e-01 -2.6503909091969130e-01 -2.6495265265245660e-01 -2.6483115379958383e-01
 -2.6467606922795250e-01 -2.6448882936558149e-01 -2.6427082047329326e-01 -2.6402338492518845e-01 -2.6374782149793097e-01
 -2.6344538566884351e-01 -2.6311728992281386e-01 -2.6276470406801128e-01 -2.6238875556041402e-01 -2.6199052983714644e-01
 -2.6157107065862756e-01 -2.6113138045952955e-01 -2.6067242070854690e-01 -2.6019511227697600e-01 -2.5970033581610541e-01
 -2.5918893214341637e-01 -2.5866170263759419e-01 -2.5811940964234981e-01 -2.5756277687905182e-01 -2.5699248986816953e-01
 -2.5640919635952564e-01 -2.5581350677136033e-01 -2.5520599463820542e-01 -2.5458719706756888e-01 -2.5395761520543020e-01
 -2.5331771471054593e-01 -2.5266792623756612e-01 -2.5200864592896094e-01 -2.5134023591575788e-01 -2.5066302482708941e-01
 -2.4997730830855142e-01 -2.4928334954937173e-01 -2.4858137981853873e-01 -2.4787159903235281e-01 -2.4715417646827112e-01
 -2.4642925160985768e-01 -2.4569693501793446e-01 -2.4495730921366071e-01 -2.4421042957350583e-01 -2.4345632523611474e-01
 -2.4269500002106684e-01 -2.4192643335952779e-01 -2.4115058123679445e-01 -2.4036737714673295e-01 -2.3957673305810989e-01
 -2.3877854039281646e-01 -2.3797267101598574e-01 -2.3715897823800330e-01 -2.3633729782841048e-01 -2.3550744904170121e-01
 -2.3466923565501147e-01 -2.3382244701770219e-01 -2.3296685911283518e-01 -2.3210223563054203e-01 -2.3122832905328616e-01
 -2.3034488175301798e-01 -2.2945162710022324e-01 -2.2854829058486412e-01 -2.2763459094921401e-01 -2.2671024133258461e-01
 -2.2577495042794699e-01 -2.2482842365044495e-01 -2.2387036431780200e-01 -2.2290047484262121e-01 -2.2191845793657822e-01
 -2.2092401782650720e-01 -2.1991686148238018e-01 -2.1889669985717924e-01 -2.1786324913866184e-01 -2.1681623201301933e-01
 -2.1575537894042840e-01 -2.1468042944249577e-01 -2.1359113340159605e-01 -2.1248725237210220e-01 -2.1136856090350981e-01
 -2.1023484787545391e-01 -2.0908591784461908e-01 -2.0792159240354274e-01 -2.0674171155131127e-01 -2.0554613507614947e-01
 -2.0433474394990309e-01 -2.0310744173441425e-01 -2.0186415599979021e-01 -2.0060483975456500e-01 -1.9932947288775432e-01
 -1.9803806362280349e-01 -1.9673064996480807e-01 -1.9540730067454629e-01 -1.9406811501671539e-01 -1.9271322201701380e-01
 -1.9134277969113930e-01 -1.8995697426426339e-01 -1.8855601938098299e-01 -1.8714015530574837e-01 -1.8570964811376794e-01
 -1.8426478887238984e-01 -1.8280589281295997e-01 -1.8133329849315705e-01 -1.7984736694980394e-01 -1.7834848084215629e-01
 -1.7683704358566710e-01 -1.7531347847622877e-01 -1.7377822780489119e-01 -1.7223175196305698e-01 -1.7067452853815321e-01
 -1.6910705139977975e-01 -1.6752982977633474e-01 -1.6594338732211605e-01 -1.6434826117490026e-01 -1.6274500100399744e-01
 -1.6113416804878361e-01 -1.5951633414770910e-01 -1.5789208075778391e-01 -1.5626199796453982e-01 -1.5462668348246922e-01
 -1.5298674164594037e-01 -1.5134278239058971e-01 -1.4969542022519064e-01 -1.4804527319399907e-01 -1.4639296182957562e-01
 -1.4473910809608465e-01 -1.4308433432306983e-01 -1.4142926212970647e-01 -1.3977451133953059e-01 -1.3812069888564460e-01
 -1.3646843770639985e-01 -1.3481833563155557e-01 -1.3317099425891474e-01 -1.3152700782143686e-01 -1.2988696204482691e-01
 -1.2825143299560138e-01 -1.2662098591963075e-01 -1.2499617407115901e-01 -1.2337753753229949e-01 -1.2176560202300768e-01
 -1.2016087770153067e-01 -1.1856385795533313e-01 -1.1697501818250026e-01 -1.1539481456361718e-01 -1.1382368282431819e-01
 -1.1226203706667669e-01 -1.1071026924759299e-01 -1.0916874940273559e-01 -1.0763782599774512e-01 -1.0611782628487827e-01
 -1.0460905666427996e-01 -1.0311180304988342e-01 -1.0162633123993883e-01 -1.0015288729216959e-01 -9.8691697903557127e-02
 -9.7242970794753664e-02 -9.5806895099123143e-02 -9.4383641756410355e-02 -9.2973363911038137e-02 -9.1576197315032692e-02
 -9.0192260735577207e-02 -8.8821656367193386e-02 -8.7464470248551335e-02 -8.6120772683907401e-02 -8.4790618669170315e-02
 -8.3474048322595334e-02 -8.2171087320106709e-02 -8.0881747335247958e-02 -7.9606026483760778e-02 -7.8343909772791584e-02
 -7.7095369554726553e-02 -7.5860365985654613e-02 -7.4638847488458671e-02 -7.3430751220534940e-02 -7.2236003546140404e-02
 -7.1054520513368427e-02 -6.9886208335752570e-02 -6.8730963878498363e-02 -6.7588675149343511e-02 -6.6459221794045911e-02
 -6.5342475596500069e-02 -6.4238300983481544e-02 -6.3146555534019530e-02 -6.2067090493397585e-02 -6.0999751291782534e-02
 -5.9944378067481520e-02 -5.8900806194827085e-02 -5.7868866816690560e-02 -5.6848387381623462e-02 -5.5839192185627072e-02
 -5.4841102918550190e-02 -5.3853939215114985e-02 -5.2877519210570989e-02 -5.1911660100977280e-02 -5.0956178708112726e-02
 -5.0010892049014433e-02 -4.9075617910144309e-02 -4.8150175426183821e-02 -4.7234385661274962e-02 -4.6328072103661702e-02
 -4.5431060857846720e-02 -4.4543180679561971e-02 -4.3664263001568240e-02 -4.2794141959450409e-02 -4.1932654417408920e-02
 -4.1079639994047283e-02 -4.0234941088155812e-02 -3.9398402904491307e-02 -3.8569873479552971e-02 -3.7749203707354420e-02
 -3.6936247365191764e-02 -3.6130861139407812e-02 -3.5332904651152429e-02 -3.4542240482138935e-02 -3.3758734200396698e-02
 -3.2982254386019753e-02 -3.2212672656911606e-02 -3.1449863694526098e-02 -3.0693705269604389e-02 -2.9944078267908097e-02
 -2.9200866715948508e-02 -2.8463957806711859e-02 -2.7733241925380847e-02 -2.7008612675052140e-02 -2.6289966902450033e-02
 -2.5577204723636265e-02 -2.4870229549715843e-02 -2.4168948112539109e-02 -2.3473270490399788e-02 -2.2783110133729252e-02
 -2.2098383890786825e-02 -2.1419012033346237e-02 -2.0744918282378167e-02 -2.0076029833728939e-02 -1.9412277383795268e-02
 -1.8753595155195160e-02 -1.8099920922434919e-02 -1.7451196037572239e-02 -1.6807365455875460e-02 -1.6168377761478864e-02
 -1.5534185193034161e-02 -1.4904743669358003e-02 -1.4280012815075698e-02 -1.3659955986260953e-02 -1.3044540296071785e-02
 -1.2433736640382533e-02 -1.1827519723411927e-02 -1.1225868083347391e-02 -1.0628764117965301e-02 -1.0036194110247488e-02
 -9.4481482539937791e-03 -8.8646206794295770e-03 -8.2856094768083040e-03 -7.7111166963414329e-03 -7.1411483128188923e-03
 -6.5757141819101613e-03 -6.0148279958326945e-03 -5.4585072384936142e-03 -4.9067731401047062e-03 -4.3596506312707098e-03
 -3.8171682965508990e-03 -3.2793583274939491e-03 -2.7462564751461042e-03 -2.2179020020326361e-03 -1.6943376336125925e-03
 -1.1756095092068342e-03 -6.6176713239937473e-04 -1.5286332091201001e-04  3.5104584404777647e-04  8.4990106896558522e-04
  1.3436398997256046e-03  1.8321967738428226e-03  2.3155030732219229e-03  2.7934871774429114e-03  3.2660745175734423e-03
  3.7331876305078575e-03  4.1947462138329167e-03  4.6506671812202548e-03  5.1008647183455359e-03  5.5452503393343174e-03
  5.9837329437346289e-03  6.4162188740162383e-03  6.8426119735966436e-03  7.2628136453937869e-03  7.6767229109054192e-03
  8.0842364698152439e-03  8.4852487601257236e-03  8.8796520188175899e-03  9.2673363430361005e-03  9.6481897518039591e-03
  1.0022098248260988e-02  1.0388945882430441e-02  1.0748614814512121e-02  1.1100985378702103e-02  1.1445936147539242e-02
  1.1783343996778333e-02  1.2113084170790043e-02  1.2435030348487475e-02  1.2749054709779472e-02  1.3055028002550694e-02
  1.3352819610168249e-02  1.3642297619515213e-02  1.3923328889550701e-02  1.4195779120396755e-02  1.4459512922951888e-02
  1.4714393889449106e-02  1.4960284695339197e-02  1.5197047339946356e-02  1.5424543482069005e-02  1.5642634785882861e-02
  1.5851183269300882e-02  1.6050051654785819e-02  1.6239103722615358e-02  1.6418204666599868e-02  1.6587221452252745e-02
  1.6746023177413381e-02  1.6894481435322680e-02  1.7032470680151242e-02  1.7159868594980098e-02  1.7276556462234062e-02
  1.7382419536567689e-02  1.7477347420203831e-02  1.7561234440724778e-02  1.7633980031316030e-02  1.7695489113462651e-02
  1.7745672482098213e-02  1.7784447193206366e-02  1.7811736953874995e-02  1.7827472514802972e-02  1.7831592065259527e-02
  1.7824041630496206e-02  1.7804775471611418e-02  1.7773756487867626e-02  1.7730956621461080e-02  1.7676357264744206e-02
  1.7609949669900548e-02  1.7531735361072359e-02  1.7441726548940748e-02  1.7339946547758452e-02  1.7226430194835204e-02
  1.7101224272475703e-02  1.6964387932370196e-02  1.6815993122437613e-02  1.6656125016121386e-02  1.6484882444137778e-02
  1.6302378328676877e-02  1.6108740120056170e-02  1.5904110235826708e-02  1.5688646502331895e-02  1.5462522598718848e-02
  1.5225928503402380e-02  1.4979070942981579e-02  1.4722173843608986e-02  1.4455478784812377e-02  1.4179245455769129e-02
  1.3893752114033217e-02  1.3599296046714787e-02  1.3296194034112337e-02  1.2984782815796765e-02  1.2665419534789502e-02
  1.2338481765134289e-02  1.2004366727556757e-02  1.1663490256994454e-02  1.1316285756747082e-02  1.0963203145015463e-02
  1.0604707793829235e-02  1.0241279460363278e-02  9.8734112106428542e-03  9.5016083356374952e-03  9.1263872597435996e-03
  8.7482744416557748e-03  8.3678052676268867e-03  7.9855229371168582e-03  7.6019773408301777e-03  7.2177239311421440e-03
  6.8333225849138432e-03  6.4493364586958365e-03  6.0663308363205970e-03  5.6848719688836593e-03  5.3055259071134999e-03
  4.9288573261301507e-03  4.5554283425925301e-03  4.1857973242345149e-03  3.8205176917897260e-03  3.4601367133050495e-03
  3.1051942908428922e-03  2.7562217395721423e-03  2.4137405592478903e-03  2.0782611980798369e-03  1.7502818089894781e-03
  1.4302869982559675e-03  1.1187465665507418e-03  8.1611424236086028e-04  5.2282640780107448e-04  2.3930081681461555e-04
 -3.4064694237264137e-05 -2.9689350359705816e-04 -5.4883150874400878e-04 -7.8954843863841904e-04 -1.0187391735772026e-03
 -1.2361250726607258e-03 -1.4414553088709216e-03 -1.6345082117606648e-03 -1.8150926177544372e-03 -1.9830492280602480e-03
 -2.1382519741928261e-03 -2.2806093911081028e-03 -2.4100659979489616e-03 -2.5266036864022346e-03 -2.6302431166670024e-03
 -2.7210451210341663e-03 -2.7991121150772540e-03 -2.8645895146006684e-03 -2.9176668794415198e-03 -2.9585773601870338e-03
 -2.9875956443245581e-03 -3.0050357088437668e-03 -3.0112485568763499e-03 -3.0066199388126534e-03 -2.9915680578952741e-03
 -2.9665412602896076e-03 -2.9320157096313516e-03 -2.8884930460509584e-03 -2.8364980296750487e-03 -2.7765761686047697e-03
 -2.7092913313711137e-03 -2.6352233438671890e-03 -2.5549655707574415e-03 -2.4691224813638327e-03 -2.3783072000289700e-03
 -2.2831390409561929e-03 -2.1842410275266086e-03 -2.0822373960930865e-03 -1.9777510842511991e-03 -1.8714012035871259e-03
 -1.7638004969025023e-03 -1.6555527799162267e-03 -1.5472503674432221e-03 -1.4394714840501460e-03 -1.3327776591880601e-03
 -1.2277111068020477e-03 -1.1247920894177925e-03 -1.0245162667051029e-03 -9.2735202851839229e-04 -8.3373781241411946e-04
 -7.4407940564517124e-04 -6.5874723163220886e-04 -5.7807362091195750e-04 -5.0235006656246673e-04 -4.3182446410530375e-04
 -3.6669833588471310e-04 -3.0712403992372647e-04 -2.5320196325723108e-04 -2.0497769974197640e-04 -1.6243921234356161e-04
 -1.2551397990034373e-04 -9.4066128364324395e-05 -6.7893546518981622e-05 -4.6724986174053032e-05 -3.0217146837275475e-05
 -1.7951744863085523e-05 -9.4325670782495473e-06 -4.0825088844742520e-06 -1.2405968379637563e-06 -1.5899570591859552e-07
  0.0000000000000000e+00
