# Supplementary material
Source: publisher figshare collection journal article supplement (https://rs.figshare.com/ndownloader/files/37464464)
Supplement: Supplementary file 2 [file 37464464 › Ordered_Nanoporous_Metals_SI/ONMs_EAM_Potential_files/EAM_Au.Sheng.lammps.eam]

# EAM potentials generated by H.W.Sheng (hsheng@gmu.edu) on Mon May 24 10:44:28 2010
#
##
   2  Au1 Au2   
 1001   1.0000000000000000e-03 1001   6.0999999999999995e-03   6.0999999999999996e+00 # nrho drho nr dr cutoff
   79 196.97  0 dummy #Atomic_number  atomic_mass (g/cm^3) lattice_constant lattice_type
 -8.1683022171730835e-01 -7.8316534009527172e-01 -7.4934132506895479e-01 -7.1535819088606389e-01 -6.8121596120736516e-01
 -6.4691466903347505e-01 -6.1245435663165160e-01 -5.7783507546258395e-01 -5.4305688610718406e-01 -5.0811985819337657e-01
 -4.7302407032288990e-01 -4.3776960999804626e-01 -4.0235657354855292e-01 -3.6678506605829242e-01 -3.3105520129211324e-01
 -2.9516710162262072e-01 -2.5912089795696691e-01 -2.2291672966364218e-01 -1.8655474449926501e-01 -1.5003509853537311e-01
 -1.1335795608521360e-01 -7.6523489630534236e-02 -3.9531879748373355e-02 -2.3833150378506085e-03  3.4922007953041900e-02
  7.2383884800649390e-02  1.1000210327886417e-01  1.4777644343233409e-01  1.8570667764967286e-01  2.2379257073666892e-01
  2.6203387998949468e-01  3.0043035526791717e-01  3.3898173906850515e-01  3.7768776659784054e-01  4.1654816584572718e-01
  4.5556265765839965e-01  4.9473095581173310e-01  5.3405276708445337e-01  5.7352779133134490e-01  6.1315572155646125e-01
  6.5293624398633432e-01  6.9286903814318268e-01  7.3295377691812302e-01  7.7319012664437736e-01  8.1357774717048448e-01
  8.5411629193350669e-01  8.9480540803224218e-01  9.3564473630043266e-01  9.7663391137997302e-01  1.0177725617941200e+00
  1.0590603100207043e+00  1.1004967725653363e+00  1.1420815600346179e+00  1.1838142772093510e+00  1.2256945231177476e+00
  1.2677218911086379e+00  1.3098959689246814e+00  1.3522163387755746e+00  1.3946825774112614e+00  1.4372942561951425e+00
  1.4800509411772840e+00  1.5229521931676286e+00  1.5659975678092017e+00  1.6091866156513239e+00  1.6525188822228212e+00
  1.6959939081052280e+00  1.7396112290060057e+00  1.7833703758317445e+00  1.8272708747613762e+00  1.8713122473193837e+00
  1.9154940104490090e+00  1.9598156765854640e+00  2.0042767537291382e+00  2.0488767455188106e+00  2.0936151513048569e+00
  2.1384914662224590e+00  2.1835051812648150e+00  2.2286557833563503e+00  2.2739427554259231e+00  2.3193655764800369e+00
  2.3649237216760493e+00  2.4106166623953804e+00  2.4564438663167225e+00  2.5024047974892514e+00  2.5484989164058329e+00
  2.5947256800762331e+00  2.6410845421003288e+00  2.6875749527413171e+00  2.7341963589989229e+00  2.7809482046826086e+00
  2.8278299304847865e+00  2.8748409740540239e+00  2.9219807700682563e+00  2.9692487503079925e+00  3.0166443437295287e+00
  3.0641669765381545e+00  3.1118160722613650e+00  3.1595910518220669e+00  3.2074913336117903e+00  3.2555163335638970e+00
  3.3036654652267923e+00  3.3519381398371295e+00  3.4003337663930249e+00  3.4488517517272617e+00  3.4974915005805047e+00
  3.5462524156745077e+00  3.5951338977853173e+00  3.6441353458164945e+00  3.6932561568723128e+00  3.7424957263309699e+00
  3.7918534479178043e+00  3.8413287137784953e+00  3.8909209145522774e+00  3.9406294394451495e+00  3.9904536763030820e+00
  4.0403930116852287e+00  4.0904468309371360e+00  4.1406145182639502e+00  4.1908954568036263e+00  4.2412890287001437e+00
  4.2917946151767072e+00  4.3424115966089634e+00  4.3931393525982063e+00  4.4439772620445837e+00  4.4949247032203141e+00
  4.5459810538428922e+00  4.5971456911482980e+00  4.6484179919642052e+00  4.6997973327831932e+00  4.7512830898359546e+00
  4.8028746391645063e+00  4.8545713566953959e+00  4.9063726183129139e+00  4.9582777999323051e+00  5.0102862775729688e+00
  5.0623974274316810e+00  5.1146106259557929e+00  5.1669252499164466e+00  5.2193406764817816e+00  5.2718562832901474e+00
  5.3244714485233064e+00  5.3771855509796511e+00  5.4299979701474097e+00  5.4829080862778516e+00  5.5359152804585072e+00
  5.5890189346863677e+00  5.6422184319410960e+00  5.6955131562582411e+00  5.7489024928024435e+00  5.8023858279406415e+00
  5.8559625493152927e+00  5.9096320459175651e+00  5.9633937081605648e+00  6.0172469279525318e+00  6.0711910987700586e+00
  6.1252256157312921e+00  6.1793498756691481e+00  6.2335632772045200e+00  6.2878652208194854e+00  6.3422551089305204e+00
  6.3967323459617029e+00  6.4512963384179267e+00  6.5059464949581098e+00  6.5606822264684013e+00  6.6155029461353951e+00
  6.6704080695193353e+00  6.7253970146273270e+00  6.7804692019865493e+00  6.8356240547174556e+00  6.8908609986069944e+00
  6.9461794621818100e+00  7.0015788767814549e+00  7.0570586766315992e+00  7.1126182989172424e+00  7.1682571838559168e+00
  7.2239747747709044e+00  7.2797705181644377e+00  7.3356438637909163e+00  7.3915942647301156e+00  7.4476211774603938e+00
  7.5037240619318952e+00  7.5599023816397759e+00  7.6161556036973961e+00  7.6724831989095419e+00  7.7288846418456254e+00
  7.7853594109129025e+00  7.8419069884296748e+00  7.8985268606985075e+00  7.9552185180794242e+00  8.0119814550631325e+00
  8.0688151703442283e+00  8.1257191668944007e+00  8.1826929520356426e+00  8.2397360375134650e+00  8.2968479395700978e+00
  8.3540281790177122e+00  8.4112762813116149e+00  8.4685917766234695e+00  8.5259741999145007e+00  8.5834230910087026e+00
  8.6409379946660501e+00  8.6985184606548369e+00  8.7561640438012471e+00  8.8138743039811782e+00  8.8716488060893113e+00
  8.9294871200072965e+00  8.9873888205719457e+00  9.0453534875434176e+00  9.1033807055734162e+00  9.1614700641733773e+00
  9.2196211576826563e+00  9.2778335852367224e+00  9.3361069507353456e+00  9.3944408628107912e+00  9.4528349347960052e+00
  9.5112887846928107e+00  9.5698020351400928e+00  9.6283743133819879e+00  9.6870052512360818e+00  9.7456944850615930e+00
  9.8044416557275671e+00  9.8632464085810607e+00  9.9221083934153427e+00  9.9810272644380706e+00  1.0040002680239496e+01
  1.0099034303760645e+01  1.0158121802261507e+01  1.0217264847289233e+01  1.0276463114646322e+01  1.0335716284358810e+01
  1.0395024040644461e+01  1.0454386071880961e+01  1.0513802070574100e+01  1.0573271733325971e+01  1.0632794760803158e+01
  1.0692370857704921e+01  1.0751999732731395e+01  1.0811681098551775e+01  1.0871414671772504e+01  1.0931200172905470e+01
  1.0991037326336190e+01  1.1050925860292008e+01  1.1110865506810274e+01  1.1170856001706548e+01  1.1230897084542777e+01
  1.1290988498595492e+01  1.1351129990824006e+01  1.1411321311838584e+01  1.1471562215868655e+01  1.1531852460730988e+01
  1.1592191807797889e+01  1.1652580021965388e+01  1.1713016871621436e+01  1.1773502128614084e+01  1.1834035568219679e+01
  1.1894616969111063e+01  1.1955246113325744e+01  1.2015922786234107e+01  1.2076646776507591e+01  1.2137417876086882e+01
  1.2198235880150106e+01  1.2259100587081019e+01  1.2320011798437191e+01  1.2380969318918211e+01  1.2441972956333856e+01
  1.2503022521572305e+01  1.2564117828568309e+01  1.2625258694271393e+01  1.2686444938614041e+01  1.2747676384479892e+01
  1.2808952857671926e+01  1.2870274186880653e+01  1.2931640203652304e+01  1.2993050742357031e+01  1.3054505640157080e+01
  1.3116004736974995e+01  1.3177547875461801e+01  1.3239134900965203e+01  1.3300765661497763e+01  1.3362440007705104e+01
  1.3424157792834089e+01  1.3485918872701021e+01  1.3547723105659824e+01  1.3609570352570241e+01  1.3671460476766025e+01
  1.3733393344023121e+01  1.3795368822527857e+01  1.3857386782845149e+01  1.3919447097886675e+01  1.3981549642879067e+01
  1.4043694295332116e+01  1.4105880935006940e+01  1.4168109443884198e+01  1.4230379706132256e+01  1.4292691608075399e+01
  1.4355045038162011e+01  1.4417439886932762e+01  1.4479876046988803e+01  1.4542353412959962e+01  1.4604871881472924e+01
  1.4667431351119427e+01  1.4730031722424449e+01  1.4792672897814406e+01  1.4855354781585326e+01  1.4918077279871062e+01
  1.4980840300611463e+01  1.5043643753520575e+01  1.5106487550054828e+01  1.5169371603381224e+01  1.5232295828345531e+01
  1.5295260141440473e+01  1.5358264460773920e+01  1.5421308706037074e+01  1.5484392798472665e+01  1.5547516660843144e+01
  1.5610680217398858e+01  1.5673883393846264e+01  1.5737126117316098e+01  1.5800408316331573e+01  1.5863729920776578e+01
  1.5927090861863849e+01  1.5990491072103183e+01  1.6053930485269603e+01  1.6117409036371576e+01  1.6180926661619175e+01
  1.6244483298392289e+01  1.6308078885208811e+01  1.6371713361692819e+01  1.6435386668542776e+01  1.6499098747499712e+01
  1.6562849541315423e+01  1.6626638993720650e+01  1.6690467049393291e+01  1.6754333653926558e+01  1.6818238753797203e+01
  1.6882182296333674e+01  1.6946164229684342e+01  1.7010184502785656e+01  1.7074243065330361e+01  1.7138339867735667e+01
  1.7202474861111448e+01  1.7266647997228450e+01  1.7330859228486446e+01  1.7395108507882455e+01  1.7459395788978917e+01
  1.7523721025871893e+01  1.7588084173159253e+01  1.7652485185908851e+01  1.7716924019626749e+01  1.7781400630225367e+01
  1.7845914973991707e+01  1.7910467007555525e+01  1.7975056687857524e+01  1.8039683972117551e+01  1.8104348817802780e+01
  1.8169051182595901e+01  1.8233791024363324e+01  1.8298568301123353e+01  1.8363382971014378e+01  1.8428234992263079e+01
  1.8493124323152610e+01  1.8558050921990777e+01  1.8623014747078244e+01  1.8688015756676712e+01  1.8753053908977130e+01
  1.8818129162067855e+01  1.8883241473902856e+01  1.8948390802269920e+01  1.9013577104758820e+01  1.9078800338729515e+01
  1.9144060461280333e+01  1.9209357429216176e+01  1.9274691199016701e+01  1.9340061726804507e+01  1.9405468968313322e+01
  1.9470912878856222e+01  1.9536393413293776e+01  1.9601910526002278e+01  1.9667464170841910e+01  1.9733054301124945e+01
  1.9798680869583933e+01  1.9864343828339898e+01  1.9930043128870508e+01  1.9995778721978304e+01  2.0061550557758842e+01
  2.0127358585568928e+01  2.0193202753994775e+01  2.0259083010820209e+01  2.0324999302994861e+01  2.0390951576602347e+01
  2.0456939776828477e+01  2.0522963847929422e+01  2.0589023733199916e+01  2.0655119374941442e+01  2.0721250714430440e+01
  2.0787417691886468e+01  2.0853620246440418e+01  2.0919858316102690e+01  2.0986131837731392e+01  2.1052440747000521e+01
  2.1118784978368161e+01  2.1185164465045098e+01  2.1251579138974208e+01  2.1318028930837340e+01  2.1384513770072971e+01
  2.1451033584894297e+01  2.1517588302307306e+01  2.1584177848128867e+01  2.1650802147004807e+01  2.1717461122428006e+01
  2.1784154696756470e+01  2.1850882791231406e+01  2.1917645325995327e+01  2.1984442220110115e+01  2.2051273391575112e+01
  2.2118138757345200e+01  2.2185038233348891e+01  2.2251971734506398e+01  2.2318939174747729e+01  2.2385940467030760e+01
  2.2452975523359328e+01  2.2520044254801299e+01  2.2587146571506672e+01  2.2654282382725643e+01  2.2721451596826697e+01
  2.2788654121314682e+01  2.2855889862848905e+01  2.2923158727261210e+01  2.2990460619574055e+01  2.3057795444018591e+01
  2.3125163104052771e+01  2.3192563502379393e+01  2.3259996540964220e+01  2.3327462121054037e+01  2.3394960143194748e+01
  2.3462490507249449e+01  2.3530053112416528e+01  2.3597647857247722e+01  2.3665274639666222e+01  2.3732933356984741e+01
  2.3800623905923608e+01  2.3868346182628848e+01  2.3936100082690253e+01  2.4003885501159480e+01  2.4071702332568137e+01
  2.4139550470945839e+01  2.4207429809838324e+01  2.4275340242325509e+01  2.4343281661039597e+01  2.4411253958183138e+01
  2.4479257025547120e+01  2.4547290754529055e+01  2.4615355036151062e+01  2.4683449761077949e+01  2.4751574819635280e+01
  2.4819730101827492e+01  2.4887915497355941e+01  2.4956130895637010e+01  2.5024376185820177e+01  2.5092651256806111e+01
  2.5160955997264743e+01  2.5229290295653350e+01  2.5297654040234654e+01  2.5366047119094880e+01  2.5434469420161847e+01
  2.5502920831223072e+01  2.5571401239943818e+01  2.5639910533885203e+01  2.5708448600522274e+01  2.5777015327262085e+01
  2.5845610601461782e+01  2.5914234310446702e+01  2.5982886341528427e+01  2.6051566582022890e+01  2.6120274919268443e+01
  2.6189011240643953e+01  2.6257775433586875e+01  2.6326567385611341e+01  2.6395386984326230e+01  2.6464234117453273e+01
  2.6533108672845113e+01  2.6602010538503404e+01  2.6670939602596885e+01  2.6739895753479470e+01  2.6808878879708317e+01
  2.6877888870061923e+01  2.6946925613558214e+01  2.7015988999472611e+01  2.7085078917356107e+01  2.7154195257053384e+01
  2.7223337908720858e+01  2.7292506762844788e+01  2.7361701710259336e+01  2.7430922642164674e+01  2.7500169450145052e+01
  2.7569442026186877e+01  2.7638740262696817e+01  2.7708064052519852e+01  2.7777413288957387e+01  2.7846787865785316e+01
  2.7916187677272106e+01  2.7985612618196900e+01  2.8055062583867574e+01  2.8124537470138829e+01  2.8194037173430274e+01
  2.8263561590744516e+01  2.8333110619685229e+01  2.8402684158475253e+01  2.8472282105974656e+01  2.8541904361698837e+01
  2.8611550825836602e+01  2.8681221399268239e+01  2.8750915983583607e+01  2.8820634481100228e+01  2.8890376794881355e+01
  2.8960142828754051e+01  2.9029932487327294e+01  2.9099745676010048e+01  2.9169582301029330e+01  2.9239442269448325e+01
  2.9309325489184438e+01  2.9379231869027393e+01  2.9449161318657321e+01  2.9519113748662825e+01  2.9589089070559076e+01
  2.9659087196805888e+01  2.9729108040825814e+01  2.9799151517022210e+01  2.9869217540797337e+01  2.9939306028570421e+01
  3.0009416897795766e+01  3.0079550066980801e+01  3.0149705455704201e+01  3.0219882984633934e+01  3.0290082575545362e+01
  3.0360304151339339e+01  3.0430547636060258e+01  3.0500812954914156e+01  3.0571100034286800e+01  3.0641408801761756e+01
  3.0711739186138480e+01  3.0782091117450406e+01  3.0852464526983013e+01  3.0922859347291919e+01  3.0993275512220976e+01
  3.1063712956920313e+01  3.1134171617864467e+01  3.1204651432870435e+01  3.1275152341115756e+01  3.1345674283156626e+01
  3.1416217200945926e+01  3.1486781037851365e+01  3.1557365738673518e+01  3.1627971249663926e+01  3.1698597518543188e+01
  3.1769244494519018e+01  3.1839912128304359e+01  3.1910600372135434e+01  3.1981309179789864e+01  3.2052038506604717e+01
  3.2122788309494595e+01  3.2193558546969761e+01  3.2264349179154159e+01  3.2335160167803529e+01  3.2405991476323507e+01
  3.2476843069787655e+01  3.2547714914955598e+01  3.2618606980291084e+01  3.2689519235980065e+01  3.2760451653948778e+01
  3.2831404207881832e+01  3.2902376873240286e+01  3.2973369627279766e+01  3.3044382449068479e+01  3.3115415319505352e+01
  3.3186468221338110e+01  3.3257541139181328e+01  3.3328634059534537e+01  3.3399746970800315e+01  3.3470879863302336e+01
  3.3542032729303493e+01  3.3613205563023953e+01  3.3684398360659245e+01  3.3755611120398349e+01  3.3826843842441782e+01
  3.3898096529019668e+01  3.3969369184409835e+01  3.4040661814955875e+01  3.4111974429085258e+01  3.4183307037327388e+01
  3.4254659652331711e+01  3.4326032288885756e+01  3.4397424963933275e+01  3.4468837696592288e+01  3.4540270508173158e+01
  3.4611723422196711e+01  3.4683196464412276e+01  3.4754689662815814e+01  3.4826203047667946e+01  3.4897736651512098e+01
  3.4969290509192518e+01  3.5040864657872113e+01  3.5112459137042116e+01  3.5184073988511322e+01  3.5255709256387327e+01
  3.5327364987057337e+01  3.5399041229169065e+01  3.5470738033611610e+01  3.5542455453496316e+01  3.5614193544137656e+01
  3.5685952363034069e+01  3.5757731969848884e+01  3.5829532426391154e+01  3.5901353796596531e+01  3.5973196146508158e+01
  3.6045059544257512e+01  3.6116944060045292e+01  3.6188849766122296e+01  3.6260776736770275e+01  3.6332725048282818e+01
  3.6404694778946215e+01  3.6476686009020334e+01  3.6548698820719487e+01  3.6620733298193315e+01  3.6692789527507635e+01
  3.6764867596625329e+01  3.6836967595387215e+01  3.6909089615492917e+01  3.6981233750481728e+01  3.7053400095713478e+01
  3.7125588748349443e+01  3.7197799807333162e+01  3.7270033373371341e+01  3.7342289548914721e+01  3.7414568438138943e+01
  3.7486870146925426e+01  3.7559194782842226e+01  3.7631542455124929e+01  3.7703913274657502e+01  3.7776307353953158e+01
  3.7848724807135262e+01  3.7921165749918174e+01  3.7993630299588119e+01  3.8066118574984081e+01  3.8138630696478643e+01
  3.8211166785958888e+01  3.8283726966807258e+01  3.8356311363882419e+01  3.8428920103500133e+01  3.8501553313414149e+01
  3.8574211122797045e+01  3.8646893662221125e+01  3.8719601063639274e+01  3.8792333460365839e+01  3.8865090987057485e+01
  3.8937873779694094e+01  3.9010681975559606e+01  3.9083515713222909e+01  3.9156375132518704e+01  3.9229260374528380e+01
  3.9302171581560877e+01  3.9375108897133572e+01  3.9448072465953139e+01  3.9521062433896418e+01  3.9594078947991285e+01
  3.9667122156397554e+01  3.9740192208387789e+01  3.9813289254328240e+01  3.9886413445659677e+01  3.9959564934878252e+01
  4.0032743875516410e+01  4.0105950422123719e+01  4.0179184730247769e+01  4.0252446956415035e+01  4.0325737258111744e+01
  4.0399055793764745e+01  4.0472402722722386e+01  4.0545778205235401e+01  4.0619182402437737e+01  4.0692615476327475e+01
  4.0766077589747667e+01  4.0839568906367226e+01  4.0913089590661784e+01  4.0986639807894569e+01  4.1060219724097287e+01
  4.1133829506050979e+01  4.1207469321266892e+01  4.1281139337967360e+01  4.1354839725066675e+01  4.1428570652151933e+01
  4.1502332289463958e+01  4.1576124807878116e+01  4.1649948378885227e+01  4.1723803174572403e+01  4.1797689367603958e+01
  4.1871607131202239e+01  4.1945556639128547e+01  4.2019538065663937e+01  4.2093551585590163e+01  4.2167597374170505e+01
  4.2241675607130652e+01  4.2315786460639572e+01  4.2389930111290390e+01  4.2464106736081249e+01  4.2538316512396193e+01
  4.2612559617986022e+01  4.2686836230949183e+01  4.2761146529712626e+01  4.2835490693012673e+01  4.2909868899875917e+01
  4.2984281329600059e+01  4.3058728161734791e+01  4.3133209576062683e+01  4.3207725752580025e+01  4.3282276871477720e+01
  4.3356863113122166e+01  4.3431484658036084e+01  4.3506141686879438e+01  4.3580834380430275e+01  4.3655562919565604e+01
  4.3730327485242277e+01  4.3805128258477851e+01  4.3879965420331452e+01  4.3954839151884663e+01  4.4029749634222384e+01
  4.4104697048413719e+01  4.4179681575492822e+01  4.4254703396439773e+01  4.4329762692161481e+01  4.4404859643472527e+01
  4.4479994431076022e+01  4.4555167235544516e+01  4.4630378237300832e+01  4.4705627616598981e+01  4.4780915553504983e+01
  4.4856242227877779e+01  4.4931607819350077e+01  4.5007012507309234e+01  4.5082456470878128e+01  4.5157939888896038e+01
  4.5233462939899475e+01  4.5309025802103115e+01  4.5384628653380616e+01  4.5460271671245522e+01  4.5535955032832128e+01
  4.5611678914876329e+01  4.5687443493696534e+01  4.5763248945174482e+01  4.5839095444736181e+01  4.5914983167332707e+01
  4.5990912287421139e+01  4.6066882978945372e+01  4.6142895415317057e+01  4.6218949769396396e+01  4.6295046213473071e+01
  4.6371184919247099e+01  4.6447366057809674e+01  4.6523589799624091e+01  4.6599856314506589e+01  4.6676165771607195e+01
  4.6752518339390662e+01  4.6828914185617272e+01  4.6905353477323743e+01  4.6981836380804118e+01  4.7058363061590576e+01
  4.7134933684434372e+01  4.7211548413286664e+01  4.7288207411279380e+01  4.7364910840706145e+01  4.7441658863003070e+01
  4.7518451638729701e+01  4.7595289327549850e+01  4.7672172088212442e+01  4.7749100078532457e+01  4.7826073455371734e+01
  4.7903092374619888e+01  4.7980156991175150e+01  4.8057267458925260e+01  4.8134423930728310e+01  4.8211626558393661e+01
  4.8288875492662775e+01  4.8366170883190094e+01  4.8443512878523919e+01  4.8520901626087287e+01  4.8598337272158830e+01
  4.8675819961853641e+01  4.8753349839104175e+01  4.8830927046641079e+01  4.8908551725974093e+01  4.8986224017372912e+01
  4.9063944059848069e+01  4.9141711991131771e+01  4.9219527947658811e+01  4.9297392064547431e+01  4.9375304475580165e+01
  4.9453265313184737e+01  4.9531274708414934e+01  4.9609332790931461e+01  4.9687439688982835e+01  4.9765595529386211e+01
  4.9843800437508307e+01  4.9922054537246488e+01  5.0000357951015893e+01  5.0078710799751903e+01  5.0157113202918637e+01
  5.0235565278517704e+01  5.0314067143096892e+01  5.0392618911758930e+01  5.0471220698170193e+01  5.0549872614569452e+01
  5.0628574771776606e+01  5.0707327279201380e+01  5.0786130244852089e+01  5.0864983775344342e+01  5.0943887975909796e+01
  5.1022842950404851e+01  5.1101848801319420e+01  5.1180905629785627e+01  5.1260013535586552e+01  5.1339172617164962e+01
  5.1418382971632006e+01  5.1497644694776014e+01  5.1576957881071152e+01  5.1656322623686194e+01  5.1735739014493241e+01
  5.1815207144076460e+01  5.1894727101740784e+01  5.1974298975520682e+01  5.2053922852188848e+01  5.2133598817264961e+01
  5.2213326955024407e+01  5.2293107348506993e+01  5.2372940079525698e+01  5.2452825228675380e+01  5.2532762875341525e+01
  5.2612753097708968e+01  5.2692795972770625e+01  5.2772891576336207e+01  5.2853039983040986e+01  5.2933241266354472e+01
  5.3013495498589194e+01  5.3093802750909397e+01  5.3174163093339779e+01  5.3254576594774228e+01  5.3335043322984532e+01
  5.3415563344629135e+01  5.3496136725261856e+01  5.3576763529340596e+01  5.3657443820236097e+01  5.3738177660240666e+01
  5.3818965110576890e+01  5.3899806231406387e+01  5.3980701081838504e+01  5.4061649719939069e+01  5.4142652202739129e+01
  5.4223708586243660e+01  5.4304818925440294e+01  5.4385983274308074e+01  5.4467201685826140e+01  5.4548474211982516e+01
  5.4629800903782787e+01  5.4711181811258847e+01  5.4792616983477650e+01  5.4874106468549897e+01  5.4955650313638813e+01
  5.5037248564968820e+01  5.5118901267834318e+01  5.5200608466608401e+01  5.5282370204751558e+01  5.5364186524820440e+01
  5.5446057468476560e+01  5.5527983076495047e+01  5.5609963388773359e+01  5.5691998444340008e+01  5.5774088281363319e+01
  5.5856232937160108e+01  5.5938432448204480e+01  5.6020686850136478e+01  5.6102996177770883e+01  5.6185360465105909e+01
  5.6267779745331936e+01  5.6350254050840228e+01  5.6432783413231697e+01  5.6515367863325601e+01  5.6598007431168277e+01
  5.6680702146041888e+01  5.6763452036473133e+01  5.6846257130241980e+01  5.6929117454390408e+01  5.7012033035231127e+01
  5.7095003898356296e+01  5.7178030068646279e+01  5.7261111570278359e+01  5.7344248426735447e+01  5.7427440660814852e+01
  5.7510688294636992e+01  5.7593991349654104e+01  5.7677349846658998e+01  5.7760763805793793e+01  5.7844233246558616e+01
  5.7927758187820345e+01  5.8011338647821368e+01  5.8094974644188248e+01  5.8178666193940515e+01  5.8262413313499351e+01
  5.8346216018696374e+01  5.8430074324782282e+01  5.8513988246435673e+01  5.8597957797771713e+01  5.8681982992350882e+01
  5.8766063843187723e+01  5.8850200362759537e+01  5.8934392563015138e+01  5.9018640455383590e+01  5.9102944050782895e+01
  5.9187303359628757e+01  5.9271718391843308e+01  5.9356189156863834e+01  5.9440715663651488e+01  5.9525297920700041e+01
  5.9609935936044621e+01  5.9694629717270381e+01  5.9779379271521321e+01  5.9864184605508939e+01  5.9949045725521003e+01
  6.0033962637430250e+01  6.0118935346703154e+01  6.0203963858408613e+01  6.0289048177226725e+01  6.0374188307457466e+01
  6.0459384253029455e+01  6.0544636017508680e+01  6.0629943604107204e+01  6.0715307015691920e+01  6.0800726254793275e+01
  6.0886201323613982e+01  6.0971732224037773e+01  6.1057318957638117e+01  6.1142961525686950e+01  6.1228659929163392e+01
  6.1314414168762511e+01  6.1400224244904003e+01  6.1486090157740975e+01  6.1572011907168630e+01  6.1657989492833011e+01
  6.1744022914139748e+01  6.1830112170262773e+01  6.1916257260153031e+01  6.2002458182547230e+01  6.2088714935976576e+01
  6.2175027518775501e+01  6.2261395929090369e+01  6.2347820164888219e+01  6.2434300223965522e+01  6.2520836103956846e+01
  6.2607427802343658e+01  6.2694075316463000e+01  6.2780778643516250e+01  6.2867537780577827e+01  6.2954352724603936e+01
  6.3041223472441295e+01  6.3128150020835875e+01  6.3215132366441580e+01  6.3302170505829068e+01  6.3389264435494376e+01
  6.3476414151867722e+01  6.3563619651322206e+01  6.3650880930182552e+01  6.3738197984733823e+01  6.3825570811230158e+01
  6.3912999405903498e+01  6.4000483764972316e+01  6.4088023884650369e+01  6.4175619761155374e+01  6.4263271390717790e+01
  6.4350978769589531e+01  6.4438741894052669e+01  6.4526560760428197e+01  6.4614435365084759e+01  6.4702365704447359e+01
  6.4790351775006087e+01  6.4878393573324871e+01  6.4966491096050191e+01  6.5054644339919832e+01  6.5142853301771538e+01
  6.5231117978551879e+01  6.5319438367324821e+01  6.5407814465280566e+01  6.5496246269744262e+01  6.5584733778184713e+01
  6.5673276988223066e+01  6.5761875897641659e+01  6.5850530504392623e+01  6.5939240806606705e+01  6.6028006802601936e+01
  6.6116828490892388e+01  6.6205705870196908e+01  6.6294638939447822e+01  6.6383627697799710e+01  6.6472672144638068e+01
  6.6561772279588098e+01
  1.0000000000000000e+00  9.9999682205793528e-01  9.9999747980991605e-01  1.0000020589435548e+00  1.0000107822466433e+00
  1.0000240781572438e+00  1.0000426480260027e+00  1.0000674979285662e+00  1.0000998772429679e+00  1.0001411791772774e+00
  1.0001928397492752e+00  1.0002562377858502e+00  1.0003326246733415e+00  1.0004231351873167e+00  1.0005288325974022e+00
  1.0006507552457171e+00  1.0007899627064409e+00  1.0009475689792737e+00  1.0011247390627536e+00  1.0013226694938040e+00
  1.0015425681594039e+00  1.0017856342725078e+00  1.0020530437487065e+00  1.0023459503925041e+00  1.0026654942522941e+00
  1.0030128103186777e+00  1.0033890371587830e+00  1.0037953233124248e+00  1.0042328268965990e+00  1.0047027120209753e+00
  1.0052061450423702e+00  1.0057442908440937e+00  1.0063183100417261e+00  1.0069293591034751e+00  1.0075785918875448e+00
  1.0082671612548779e+00  1.0089962206722489e+00  1.0097669254322013e+00  1.0105804326230341e+00  1.0114379004696297e+00
  1.0123404876390443e+00  1.0132893525498357e+00  1.0142856528397350e+00  1.0153305453690400e+00  1.0164251865031622e+00
  1.0175707324116219e+00  1.0187683393656013e+00  1.0200191639701095e+00  1.0213243631666828e+00  1.0226850941123118e+00
  1.0241025140507016e+00  1.0255777801840884e+00  1.0271120495720336e+00  1.0287064791284475e+00  1.0303622256734510e+00
  1.0320804459888075e+00  1.0338622968731424e+00  1.0357089351860373e+00  1.0376215178501049e+00  1.0396012018287797e+00
  1.0416491441024514e+00  1.0437665016446782e+00  1.0459544314029843e+00  1.0482140902976209e+00  1.0505466352310737e+00
  1.0529532230983389e+00  1.0554350107971682e+00  1.0579931552364297e+00  1.0606288133367894e+00  1.0633431420266448e+00
  1.0661372982376991e+00  1.0690124389005493e+00  1.0719697209410475e+00  1.0750103012799426e+00  1.0781353368346200e+00
  1.0813459845210058e+00  1.0846434012554689e+00  1.0880287439564020e+00  1.0915031695444055e+00  1.0950678349415424e+00
  1.0987238970705195e+00  1.1024725128538679e+00  1.1063148392132549e+00  1.1102520330693939e+00  1.1142852513423609e+00
  1.1184156509519489e+00  1.1226443888180211e+00  1.1269726218608080e+00  1.1314015070009540e+00  1.1359322011593791e+00
  1.1405658612571292e+00  1.1453036442152214e+00  1.1501467069545157e+00  1.1550962063956931e+00  1.1601532994593140e+00
  1.1653191430658847e+00  1.1705948941359237e+00  1.1759817095900182e+00  1.1814807463488342e+00  1.1870931613330893e+00
  1.1928201114635235e+00  1.1986627536608694e+00  1.2046222448458266e+00  1.2106997419390579e+00  1.2168964018612041e+00
  1.2232133815328992e+00  1.2296518378747872e+00  1.2362129278075353e+00  1.2428978082518327e+00  1.2497076361283770e+00
  1.2566435683578610e+00  1.2637067618609581e+00  1.2708983735583108e+00  1.2782195603705380e+00  1.2856714792182560e+00
  1.2932552870221015e+00  1.3009721407027550e+00  1.3088231971809581e+00  1.3168096133774969e+00  1.3249325462131565e+00
  1.3331931526086707e+00  1.3415925894846734e+00  1.3501320137616610e+00  1.3588125823600297e+00  1.3676354522001801e+00
  1.3766017802026311e+00  1.3857127232881317e+00  1.3949694383777473e+00  1.4043730823927782e+00  1.4139248122545169e+00
  1.4236257848839868e+00  1.4334771572016809e+00  1.4434800861273576e+00  1.4536357285802251e+00  1.4639452414794984e+00
  1.4744097817450066e+00  1.4850305062977995e+00  1.4958085720606287e+00  1.5067451359575423e+00  1.5178413549125986e+00
  1.5290983858484553e+00  1.5405173856849605e+00  1.5520995113380192e+00  1.5638459197204821e+00  1.5757577677451173e+00
  1.5878362123278849e+00  1.6000824103912104e+00  1.6124975188666557e+00  1.6250826946929720e+00  1.6378390948092421e+00
  1.6507678761472755e+00  1.6638701956240056e+00  1.6771472101352027e+00  1.6906000765597171e+00  1.7042299517753072e+00
  1.7180379926762961e+00  1.7320253561912351e+00  1.7461931992976867e+00  1.7605426790130132e+00  1.7750749523578668e+00
  1.7897911763151808e+00  1.8046925077891480e+00  1.8197801035704759e+00  1.8350551203562875e+00  1.8505187148343252e+00
  1.8661720437781761e+00  1.8820162641425542e+00  1.8980525331448992e+00  1.9142820082226126e+00  1.9307058468389231e+00
  1.9473252062617590e+00  1.9641412433424494e+00  1.9811551143242041e+00  1.9983679749334420e+00  2.0157809808272211e+00
  2.0333952881067194e+00  2.0512120538312213e+00  2.0692324364673484e+00  2.0874575956954193e+00  2.1058886913785995e+00
  2.1245268823705663e+00  2.1433733253217424e+00  2.1624291736261898e+00  2.1816955778286675e+00  2.2011736879988142e+00
  2.2208646564997543e+00  2.2407696407606723e+00  2.2608898057442111e+00  2.2812263230995375e+00  2.3017803656963336e+00
  2.3225531011962164e+00  2.3435456856133592e+00  2.3647592575364653e+00  2.3861949398687088e+00  2.4078538524071562e+00
  2.4297371267692651e+00  2.4518459213484429e+00  2.4741814348380156e+00  2.4967449027135173e+00  2.5195375682939005e+00
  2.5425606480847311e+00  2.5658152970438013e+00  2.5893025769420173e+00  2.6130234633281586e+00  2.6369789120751346e+00
  2.6611699398448017e+00  2.6855977047585387e+00  2.7102635803833857e+00  2.7351691423296471e+00  2.7603160152885087e+00
  2.7857056862180087e+00  2.8113393169862539e+00  2.8372175714327010e+00  2.8633406401179347e+00  2.8897085917686285e+00
  2.9163218069856263e+00  2.9431814133774092e+00  2.9702896896325837e+00  2.9976500226942124e+00  3.0252661006491111e+00
  3.0531409058733963e+00  3.0812757044488137e+00  3.1096691024078358e+00  3.1383171115053838e+00  3.1672150018169973e+00
  3.1963596389234095e+00  3.2257518308191711e+00  3.2553985312803868e+00  3.2853127652965397e+00  3.3155093814112173e+00
  3.3459996298763013e+00  3.3767857155360019e+00  3.4078556573142258e+00  3.4391832623314973e+00  3.4707377988195272e+00
  3.5024964998442041e+00  3.5344571322443104e+00  3.5666499395487250e+00  3.5991386006977821e+00  3.6319996263958179e+00
  3.6652952282344837e+00  3.6990460271173906e+00  3.7332044361762931e+00  3.7676404997008075e+00  3.8021530466294067e+00
  3.8364887904776999e+00  3.8520417174871588e+00  3.7014635904302162e+00  3.5546991945095447e+00  3.4117423316919764e+00
  3.2725830614194100e+00  3.1372078113554513e+00  3.0055994881320505e+00  2.8777375880961378e+00  2.7535983080562625e+00
  2.6331546560292312e+00  2.5163765619867409e+00  2.4032309886020231e+00  2.2936820419964756e+00  2.1876910824863032e+00
  2.0852168353291525e+00  1.9862155014707525e+00  1.8906408682915496e+00  1.7984444203533463e+00  1.7095754501459379e+00
  1.6239811688337498e+00  1.5416068170024775e+00  1.4623957754057191e+00  1.3862896757116179e+00  1.3132285112494961e+00
  1.2431507477564954e+00  1.1759934341242109e+00  1.1116923131453316e+00  1.0501819322602772e+00  9.9139575430383342e-01
  9.3526626825179182e-01  8.8172509996758697e-01  8.3070312294893389e-01  7.8213056907446310e-01  7.3593713935036220e-01
  6.9205211465700911e-01  6.5040446649561368e-01  6.1092296773485222e-01  5.7353630335750427e-01  5.3817318120709290e-01
  5.0476244273452142e-01  4.7323317374470975e-01  4.4351481514323021e-01  4.1553727368295057e-01  3.8923103271066628e-01
  3.6452726291373860e-01  3.4135793306673579e-01  3.1965592077806537e-01  2.9935512323661495e-01  2.8039056795838890e-01
  2.6269852353314738e-01  2.4621661037103770e-01  2.3088391144924092e-01  2.1664108305860230e-01  2.0343046555027167e-01
  1.9119619408147168e-01  1.7988430584481274e-01  1.6944279995464670e-01  1.5982162011139733e-01  1.5097261809632231e-01
  1.4284951694235939e-01  1.3540787410497285e-01  1.2860504463299988e-01  1.2240014433949677e-01  1.1675401297258553e-01
  1.1162917738629995e-01  1.0698981471143222e-01  1.0280171552637904e-01  9.9032247027988227e-02  9.5650316202404842e-02
  9.2626332995917632e-02  8.9932173485805497e-02  8.7541143051183615e-02  8.5427939543850029e-02  8.3568616459131773e-02
  8.1940546106731474e-02  8.0522382781573490e-02  7.9294025934650389e-02  7.8236583343869237e-02  7.7332334284898038e-02
  7.6564692702011966e-02  7.5918170378939789e-02  7.5378340109710257e-02  7.4931798869498481e-02  7.4566130985472032e-02
  7.4269871307637708e-02  7.4032468379687424e-02  7.3844247609845079e-02  7.3696374441712495e-02  7.3580817525115819e-02
  7.3490311886952236e-02  7.3418322102035818e-02  7.3359005463944180e-02  7.3307175155864976e-02  7.3258263421441719e-02
  7.3208284735620785e-02  7.3153798975497134e-02  7.3091874591161260e-02  7.3020051776545220e-02  7.2936305640268886e-02
  7.2839009376486602e-02  7.2726897435733365e-02  7.2599028695770951e-02  7.2454749632434978e-02  7.2293657490480459e-02
  7.2115563454428419e-02  7.1920455819412768e-02  7.1708463162025823e-02  7.1479817511165014e-02  7.1234817520989688e-02
  7.0973793099599877e-02  7.0697084008089980e-02  7.0405036189414932e-02  7.0098001416441735e-02  6.9776336970188244e-02
  6.9440405318061990e-02  6.9090573792098972e-02  6.8727214267202547e-02  6.8350702839382160e-02  6.7961419503992246e-02
  6.7559747833970979e-02  6.7146074658079147e-02  6.6720789739138933e-02  6.6284285452272731e-02  6.5836956463142027e-02
  6.5379199406186125e-02  6.4911412562861037e-02  6.4433995539878275e-02  6.3947348947443652e-02  6.3451874077496168e-02
  6.2947972581946718e-02  6.2436046150917024e-02  6.1916496190978394e-02  6.1389723503390545e-02  6.0856127962340426e-02
  6.0316108193181048e-02  5.9770061250670296e-02  5.9218382297209736e-02  5.8661464281083459e-02  5.8099697614696869e-02
  5.7533469852815516e-02  5.6963165370803953e-02  5.6389165042864467e-02  5.5811845920275986e-02  5.5231580909632844e-02
  5.4648738451083631e-02  5.4063682196569998e-02  5.3476770688065445e-02  5.2888357035814224e-02  5.2298788596570063e-02
  5.1708406651835043e-02  5.1117546086098392e-02  5.0526535065075338e-02  4.9935694713945863e-02  4.9345338795593593e-02
  4.8755773388844584e-02  4.8167296566706111e-02  4.7580198074605562e-02  4.6994759008629178e-02  4.6411251493760936e-02
  4.5829938362121306e-02  4.5251072831206135e-02  4.4674898182125403e-02  4.4101647437985218e-02  4.3531543074864711e-02
  4.2964796961099699e-02  4.2401610522438279e-02  4.1842174938605772e-02  4.1286671339996930e-02  4.0735271004368162e-02
  4.0188135553529798e-02  3.9645417150038262e-02  3.9107258693888314e-02  3.8573794019205312e-02  3.8045148090937383e-02
  3.7521437201547679e-02  3.7002769167706596e-02  3.6489243526984003e-02  3.5980951734541453e-02  3.5477977359824428e-02
  3.4980396283254556e-02  3.4488276892921839e-02  3.4001680281276862e-02  3.3520660441823044e-02  3.3045264465808841e-02
  3.2575532738919985e-02  3.2111499137971705e-02  3.1653191227600970e-02  3.1200630456958665e-02  3.0753832356401868e-02
  3.0312806734186064e-02  2.9877557873157337e-02  2.9448084727444646e-02  2.9024381119152006e-02  2.8606435935050745e-02
  2.8194233323271711e-02  2.7787752889997502e-02  2.7386969896154700e-02  2.6991855454106081e-02  2.6602376724342850e-02
  2.6218497112176865e-02  2.5840176464432860e-02  2.5467371266140681e-02  2.5100034837227489e-02  2.4738117529210003e-02
  2.4381566921886734e-02  2.4030328020030179e-02  2.3684343450079075e-02  2.3343553656830617e-02  2.3007897100132676e-02
  2.2677310451576022e-02  2.2351728791186569e-02  2.2031085804117584e-02  2.1715313977341916e-02  2.1404344796344215e-02
  2.1098108941813166e-02  2.0796536486333731e-02  2.0499557090931497e-02  2.0207100186301310e-02  1.9919095074233714e-02
  1.9635470967499947e-02  1.9356157023502515e-02  1.9081082377917707e-02  1.8810176178338137e-02  1.8543367617915262e-02
  1.8280585969001922e-02  1.8021760616794873e-02  1.7766821092977305e-02  1.7515697109361378e-02  1.7268318591530760e-02
  1.7024615712483149e-02  1.6784518926272800e-02  1.6547959001653074e-02  1.6314867055718937e-02  1.6085174587549524e-02
  1.5858813511850645e-02  1.5635716192597331e-02  1.5415815476676354e-02  1.5199044727528758e-02  1.4985337858792396e-02
  1.4774629367944461e-02  1.4566854369944005e-02  1.4361948630874481e-02  1.4159848601586263e-02  1.3960491451339194e-02
  1.3763815101445094e-02  1.3569758258910304e-02  1.3378260450078217e-02  1.3189262054271803e-02  1.3002704337436138e-02
  1.2818529485780940e-02  1.2636680639423102e-02  1.2457101926029210e-02  1.2279738494458082e-02  1.2104536548403303e-02
  1.1931443380035741e-02  1.1760407403646093e-02  1.1591378189287406e-02  1.1424306496417611e-02  1.1259144307542046e-02
  1.1095844861856002e-02  1.0934362688887235e-02  1.0774653642138515e-02  1.0616674932730137e-02  1.0460385163042464e-02
  1.0305744360358455e-02  1.0152714010506199e-02  1.0001257091501436e-02  9.8513381071900913e-03  9.7029231208908134e-03
  9.5559797890374908e-03  9.4104773946379703e-03  9.2663868703560318e-03  9.1236807807730611e-03  8.9823332801630441e-03
  8.8423200685033548e-03  8.7036183474851932e-03  8.5662067765240220e-03  8.4300654287699957e-03  8.2951757471184003e-03
  8.1615205002200826e-03  8.0290837384918937e-03  7.8978507501271146e-03  7.7678080171058976e-03  7.6389431712056994e-03
  7.5112449500117145e-03  7.3847031529273091e-03  7.2593085971844606e-03  7.1350530738541890e-03  7.0119293038569900e-03
  6.8899308939732746e-03  6.7690522928538013e-03  6.6492887470301094e-03  6.5306362569249590e-03  6.4130915328627584e-03
  6.2966519510800050e-03  6.1813155097357186e-03  6.0670807849218730e-03  5.9539468866738384e-03  5.8419134149808082e-03
  5.7309804157962361e-03  5.6211483370482741e-03  5.5124179846502037e-03  5.4047904785108737e-03  5.2982672085451323e-03
  5.1928497906842622e-03  5.0885400228864201e-03  4.9853398411470635e-03  4.8832512755093921e-03  4.7822764060747808e-03
  4.6824173190132129e-03  4.5836760625737162e-03  4.4860546030947995e-03  4.3895547810148842e-03  4.2941782668827417e-03
  4.1999265173679251e-03  4.1068007312712075e-03  4.0148018055350190e-03  3.9239302912538725e-03  3.8341863496848053e-03
  3.7455697082578168e-03  3.6580796165862949e-03  3.5717148024774562e-03  3.4864734279427805e-03  3.4023530452084476e-03
  3.3193505530941846e-03  3.2374621660454959e-03  3.1566834211622184e-03  3.0770092028880565e-03  2.9984337685783373e-03
  2.9209507740677655e-03  2.8445532992381803e-03  2.7692338735863125e-03  2.6949845017915416e-03  2.6217966892836501e-03
  2.5496614678105827e-03  2.4785694210062016e-03  2.4085107099580433e-03  2.3394750987750746e-03  2.2714519801554510e-03
  2.2044304009542705e-03  2.1383990877513323e-03  2.0733464724188937e-03  2.0092607176894241e-03  1.9461297427233648e-03
  1.8839412486768832e-03  1.8226827442696300e-03  1.7623415713524974e-03  1.7029049304753722e-03  1.6443599064548964e-03
  1.5866934939422208e-03  1.5298926229907629e-03  1.4739441846239635e-03  1.4188350564030426e-03  1.3645521279947565e-03
  1.3110823267391543e-03  1.2584126432173353e-03  1.2065301568192025e-03  1.1554220613112245e-03  1.1050756904041866e-03
  1.0554785433209506e-03  1.0066183103642113e-03  9.5848289848425106e-04  9.1106045684669849e-04  8.6433940240028409e-04
  8.1830844544459724e-04  7.7295661519784188e-04  7.2827328536459544e-04  6.8424819970356069e-04  6.4087149759532811e-04
  5.9813373961012861e-04  5.5602593307559111e-04  5.1453955764449964e-04  4.7366659086254962e-04  4.3339953373610360e-04
  3.9373143629995019e-04  3.5465592318505634e-04  3.1616721918632969e-04  2.7826017483036927e-04  2.4093029137708832e-04
  2.0417373312751202e-04  1.6798731040497422e-04  1.3236845203047837e-04  9.7315177451989625e-05  6.2826068873726287e-05
  2.8900243385451764e-05 -4.4626749082336825e-06 -3.7262582758601178e-05 -6.9498925643501496e-05 -1.0117072563807310e-04
 -1.3227660928545067e-04 -1.6281483546747304e-04 -1.9278332327539140e-04 -2.2217967988057797e-04 -2.5100122840523363e-04
 -2.7924503579309642e-04 -3.0690794068014997e-04 -3.3398658126533126e-04 -3.6047742318123902e-04 -3.8637678736484223e-04
 -4.1168087792818787e-04 -4.3638581002910978e-04 -4.6048763774193601e-04 -4.8398238192819809e-04 -5.0686605810733808e-04
 -5.2913470432741747e-04 -5.5078440903582595e-04 -5.7181133894998806e-04 -5.9221176692807339e-04 -6.1198209983970276e-04
 -6.3111890643665811e-04 -6.4961894522359127e-04 -6.6747919232872663e-04 -6.8469686937457802e-04 -7.0126947134865154e-04
 -7.1719479447415399e-04 -7.3247096408070268e-04 -7.4709646247503271e-04 -7.6107015681170531e-04 -7.7439132696381662e-04
 -7.8705969339370454e-04 -7.9907544502365855e-04 -8.1043926710662700e-04 -8.2115236909692567e-04 -8.3121651252094633e-04
 -8.4063403884786312e-04 -8.4940789736034331e-04 -8.5754167302525431e-04 -8.6503961436437183e-04 -8.7190666132508799e-04
 -8.7814847315112010e-04 -8.8377145625321814e-04 -8.8878279207976404e-04 -8.9319046380728509e-04 -8.9700326494796597e-04
 -9.0023077562899573e-04 -9.0288333000995149e-04 -9.0497198351850673e-04 -9.0650848008613891e-04 -9.0750521938383745e-04
 -9.0797522405781136e-04 -9.0793210696519730e-04 -9.0739003840976723e-04 -9.0636371337763635e-04 -9.0486831877297110e-04
 -9.0291950065369653e-04 -9.0053333146720472e-04 -8.9772627728606222e-04 -8.9451516504371808e-04 -8.9091714977021150e-04
 -8.8694968182787980e-04 -8.8263047414706647e-04 -8.7797746946182862e-04 -8.7300880754564492e-04 -8.6774279244712389e-04
 -8.6219785972571075e-04 -8.5639254368739641e-04 -8.5034544462042453e-04 -8.4407519603099982e-04 -8.3760043187899532e-04
 -8.3093975381366095e-04 -8.2411169840933068e-04 -8.1713470440113103e-04 -8.1002707992068807e-04 -8.0280696973183626e-04
 -7.9549232246632553e-04 -7.8810085785952931e-04 -7.8065003398615257e-04 -7.7315701449593940e-04 -7.6563863584938109e-04
 -7.5811137455342387e-04 -7.5059131439717658e-04 -7.4309411368761881e-04 -7.3563497248530852e-04 -7.2822859984008985e-04
 -7.2088918102680124e-04 -7.1363034478098321e-04 -7.0646513053458562e-04 -6.9940595565167645e-04 -6.9246458266414887e-04
 -6.8565208650742972e-04 -6.7897882175618654e-04 -6.7245438986003603e-04 -6.6608760637925214e-04 -6.5988646822047285e-04
 -6.5385812087240920e-04 -6.4800882564331743e-04 -6.4234392897501592e-04 -6.3686785421668485e-04 -6.3158412460356437e-04
 -6.2649539271584457e-04 -6.2160347001256866e-04 -6.1690935636553768e-04 -6.1241326959321366e-04 -6.0811467499462377e-04
 -6.0401231488326444e-04 -6.0010423812100497e-04 -5.9638782965199151e-04 -5.9285984003655079e-04 -5.8951641498509425e-04
 -5.8635312489202203e-04 -5.8336499436962620e-04 -5.8054653178199543e-04 -5.7789175877891858e-04 -5.7539423982978831e-04
 -5.7304711175750530e-04 -5.7084311327238206e-04 -5.6877461450604693e-04 -5.6683364654534763e-04 -5.6501193096625550e-04
 -5.6330090936776911e-04 -5.6169177290581824e-04 -5.6017549182716818e-04 -5.5874284500332272e-04 -5.5738444946442885e-04
 -5.5609078993318036e-04 -5.5485224835872171e-04 -5.5365913345055179e-04 -5.5250171021242809e-04 -5.5137022947627026e-04
 -5.5025495743606448e-04 -5.4914620518176679e-04 -5.4803435823320729e-04 -5.4690990607399398e-04 -5.4576347168541664e-04
 -5.4458584108035076e-04 -5.4336799283716123e-04 -5.4210112763360639e-04 -5.4077669778074223e-04 -5.3938643675682546e-04
 -5.3792238874121828e-04 -5.3637693814829145e-04 -5.3474283916132913e-04 -5.3301324526643177e-04 -5.3118173878642075e-04
 -5.2924236041474186e-04 -5.2718963874936922e-04 -5.2501861982670942e-04 -5.2272489665550507e-04 -5.2030463875073901e-04
 -5.1775462165922729e-04 -5.1507225379086483e-04 -5.1225558214985272e-04 -5.0930327522346979e-04 -5.0621460232624081e-04
 -5.0298941292429167e-04 -4.9962811595970647e-04 -4.9613165917488289e-04 -4.9250150843688917e-04 -4.8873962706181965e-04
 -4.8484845513915159e-04 -4.8083088885610061e-04 -4.7669025982197767e-04 -4.7243031439254480e-04 -4.6805519299437134e-04
 -4.6356940944919031e-04 -4.5897783029825447e-04 -4.5428565412669250e-04 -4.4949839088786542e-04 -4.4462184122772249e-04
 -4.3966207580915751e-04 -4.3462541463636523e-04 -4.2951840637919716e-04 -4.2434780769751818e-04 -4.1912056256556242e-04
 -4.1384378159628954e-04 -4.0852472136574107e-04 -4.0317076373739646e-04 -3.9778939518652934e-04 -3.9238818612456370e-04
 -3.8697477022343006e-04 -3.8155682373992167e-04 -3.7614204484005083e-04 -3.7073813292340504e-04 -3.6535276794750289e-04
 -3.5999358975215084e-04 -3.5466817738379888e-04 -3.4938402841989708e-04 -3.4414853829325162e-04 -3.3896897961638100e-04
 -3.3385248150587227e-04 -3.2880600890673728e-04 -3.2383634191676880e-04 -3.1895005511089667e-04 -3.1415349686554422e-04
 -3.0945276868298412e-04 -3.0485370451569503e-04 -3.0036185009071724e-04 -2.9598244223400948e-04 -2.9172038819480462e-04
 -2.8758024496996603e-04 -2.8356619862834409e-04 -2.7968204363513181e-04 -2.7593116217622144e-04 -2.7231650350295806e-04
 -2.6884056601551160e-04 -2.6550539519855300e-04 -2.6231259493763258e-04 -2.5926334035965688e-04 -2.5635839067650459e-04
 -2.5359810202864200e-04 -2.5098244032873860e-04 -2.4851099410528281e-04 -2.4618298734619749e-04 -2.4399729234245558e-04
 -2.4195244253169573e-04 -2.4004664534183791e-04 -2.3827779503469897e-04 -2.3664348554960839e-04 -2.3514102334702371e-04
 -2.3376744025214630e-04 -2.3251950629853688e-04 -2.3139374257173122e-04 -2.3038643405285563e-04 -2.2949364246224271e-04
 -2.2871121910304681e-04 -2.2803481770485983e-04 -2.2745990726732667e-04 -2.2698178490376095e-04 -2.2659558868476053e-04
 -2.2629631048182321e-04 -2.2607880881096235e-04 -2.2593782167632236e-04 -2.2586797941379446e-04 -2.2586381753463220e-04
 -2.2591978956906715e-04 -2.2603027990992440e-04 -2.2618961665623826e-04 -2.2639208445686791e-04 -2.2663193735411293e-04
 -2.2690341162732891e-04 -2.2720073863654314e-04 -2.2751815766607015e-04 -2.2784992876812742e-04 -2.2819034560645082e-04
 -2.2853374829991045e-04 -2.2887453626612605e-04 -2.2920718106508273e-04 -2.2952623924274657e-04 -2.2982636517468019e-04
 -2.3010232390965839e-04 -2.3034900401328382e-04 -2.3056143041160247e-04 -2.3073477723471936e-04 -2.3086438066041422e-04
 -2.3094575175775693e-04 -2.3097458933072330e-04 -2.3094679276181056e-04 -2.3085847482892267e-04 -2.3070597267129211e-04
 -2.3048585070580387e-04 -2.3019489825295520e-04 -2.2983012673025884e-04 -2.2938876684545296e-04 -2.2886826578971128e-04
 -2.2826628443085319e-04 -2.2758069450655387e-04 -2.2680957581755435e-04 -2.2595121342087150e-04 -2.2500409482300833e-04
 -2.2396690717316393e-04 -2.2283853445644359e-04 -2.2161805468706884e-04 -2.2030473710158774e-04 -2.1889803935208469e-04
 -2.1739760469939072e-04 -2.1580325920629353e-04 -2.1411500893074757e-04 -2.1233303711908413e-04 -2.1045770139922139e-04
 -2.0848953097387461e-04 -2.0642922381376618e-04 -2.0427764385083560e-04 -2.0203581817144977e-04 -1.9970493420961292e-04
 -1.9728633694017674e-04 -1.9478152607205060e-04 -1.9219215324141139e-04 -1.8952001920491382e-04 -1.8676707103290044e-04
 -1.8393539930261173e-04 -1.8102723529139618e-04 -1.7804494816992038e-04 -1.7499104219537915e-04 -1.7186815390470559e-04
 -1.6867904930778125e-04 -1.6542662108064599e-04 -1.6211388575870843e-04 -1.5874398092995573e-04 -1.5532016242816380e-04
 -1.5184580152610748e-04 -1.4832438212877044e-04 -1.4475949796655536e-04 -1.4115484978849418e-04 -1.3751424255545788e-04
 -1.3384158263336681e-04 -1.3014087498640063e-04 -1.2641622037020859e-04 -1.2267181252511943e-04 -1.1891193536935157e-04
 -1.1514096019222313e-04 -1.1136334284736211e-04 -1.0758362090173448e-04 -1.0380640898591179e-04 -1.0003638819435657e-04
 -9.6278292450876764e-05 -9.2536894700796302e-05 -8.8816993103121465e-05 -8.5123397222707192e-05 -8.1460914222423428e-05
 -7.7834335055321447e-05 -7.4248420656800190e-05 -7.0707888136772648e-05 -6.7217396971832105e-05 -6.3781535197418560e-05
 -6.0404805599985016e-05 -5.7091611909163794e-05 -5.3846244989932948e-05 -5.0672869034782536e-05 -4.7575507755880938e-05
 -4.4558030577241276e-05 -4.1624138826887642e-05 -3.8777351929021513e-05 -3.6020993596188111e-05 -3.3358178021442600e-05
 -3.0791796070516551e-05 -2.8324501473984241e-05 -2.5958697019428989e-05 -2.3696520743609473e-05 -2.1539832124626039e-05
 -1.9490198274087149e-05 -1.7548880129275587e-05 -1.5716818645314864e-05 -1.3994620987335557e-05 -1.2382546722641596e-05
 -1.0880494012876617e-05 -9.4879858061903402e-06 -8.2041560294048688e-06 -7.0277357801810307e-06 -5.9570395191846750e-06
 -4.9899512622531071e-06 -4.1239107725612789e-06 -3.3558997527882771e-06 -2.6824280372835543e-06 -2.0995197842332819e-06
 -1.6026996678267436e-06 -1.1869790704226071e-06 -8.4684227471524978e-07 -5.7623265590115249e-07 -3.6853887384519809e-07
 -2.1658106524701090e-07 -1.1259703580730957e-07 -4.8228452394205850e-08 -1.4507035209571019e-08 -1.8407499553888288e-09
  0.0000000000000000e+00
   79 196.97  0 dummy #Atomic_number  atomic_mass (g/cm^3) lattice_constant lattice_type
 -8.1683022171730835e-01 -7.8316534009527172e-01 -7.4934132506895479e-01 -7.1535819088606389e-01 -6.8121596120736516e-01
 -6.4691466903347505e-01 -6.1245435663165160e-01 -5.7783507546258395e-01 -5.4305688610718406e-01 -5.0811985819337657e-01
 -4.7302407032288990e-01 -4.3776960999804626e-01 -4.0235657354855292e-01 -3.6678506605829242e-01 -3.3105520129211324e-01
 -2.9516710162262072e-01 -2.5912089795696691e-01 -2.2291672966364218e-01 -1.8655474449926501e-01 -1.5003509853537311e-01
 -1.1335795608521360e-01 -7.6523489630534236e-02 -3.9531879748373355e-02 -2.3833150378506085e-03  3.4922007953041900e-02
  7.2383884800649390e-02  1.1000210327886417e-01  1.4777644343233409e-01  1.8570667764967286e-01  2.2379257073666892e-01
  2.6203387998949468e-01  3.0043035526791717e-01  3.3898173906850515e-01  3.7768776659784054e-01  4.1654816584572718e-01
  4.5556265765839965e-01  4.9473095581173310e-01  5.3405276708445337e-01  5.7352779133134490e-01  6.1315572155646125e-01
  6.5293624398633432e-01  6.9286903814318268e-01  7.3295377691812302e-01  7.7319012664437736e-01  8.1357774717048448e-01
  8.5411629193350669e-01  8.9480540803224218e-01  9.3564473630043266e-01  9.7663391137997302e-01  1.0177725617941200e+00
  1.0590603100207043e+00  1.1004967725653363e+00  1.1420815600346179e+00  1.1838142772093510e+00  1.2256945231177476e+00
  1.2677218911086379e+00  1.3098959689246814e+00  1.3522163387755746e+00  1.3946825774112614e+00  1.4372942561951425e+00
  1.4800509411772840e+00  1.5229521931676286e+00  1.5659975678092017e+00  1.6091866156513239e+00  1.6525188822228212e+00
  1.6959939081052280e+00  1.7396112290060057e+00  1.7833703758317445e+00  1.8272708747613762e+00  1.8713122473193837e+00
  1.9154940104490090e+00  1.9598156765854640e+00  2.0042767537291382e+00  2.0488767455188106e+00  2.0936151513048569e+00
  2.1384914662224590e+00  2.1835051812648150e+00  2.2286557833563503e+00  2.2739427554259231e+00  2.3193655764800369e+00
  2.3649237216760493e+00  2.4106166623953804e+00  2.4564438663167225e+00  2.5024047974892514e+00  2.5484989164058329e+00
  2.5947256800762331e+00  2.6410845421003288e+00  2.6875749527413171e+00  2.7341963589989229e+00  2.7809482046826086e+00
  2.8278299304847865e+00  2.8748409740540239e+00  2.9219807700682563e+00  2.9692487503079925e+00  3.0166443437295287e+00
  3.0641669765381545e+00  3.1118160722613650e+00  3.1595910518220669e+00  3.2074913336117903e+00  3.2555163335638970e+00
  3.3036654652267923e+00  3.3519381398371295e+00  3.4003337663930249e+00  3.4488517517272617e+00  3.4974915005805047e+00
  3.5462524156745077e+00  3.5951338977853173e+00  3.6441353458164945e+00  3.6932561568723128e+00  3.7424957263309699e+00
  3.7918534479178043e+00  3.8413287137784953e+00  3.8909209145522774e+00  3.9406294394451495e+00  3.9904536763030820e+00
  4.0403930116852287e+00  4.0904468309371360e+00  4.1406145182639502e+00  4.1908954568036263e+00  4.2412890287001437e+00
  4.2917946151767072e+00  4.3424115966089634e+00  4.3931393525982063e+00  4.4439772620445837e+00  4.4949247032203141e+00
  4.5459810538428922e+00  4.5971456911482980e+00  4.6484179919642052e+00  4.6997973327831932e+00  4.7512830898359546e+00
  4.8028746391645063e+00  4.8545713566953959e+00  4.9063726183129139e+00  4.9582777999323051e+00  5.0102862775729688e+00
  5.0623974274316810e+00  5.1146106259557929e+00  5.1669252499164466e+00  5.2193406764817816e+00  5.2718562832901474e+00
  5.3244714485233064e+00  5.3771855509796511e+00  5.4299979701474097e+00  5.4829080862778516e+00  5.5359152804585072e+00
  5.5890189346863677e+00  5.6422184319410960e+00  5.6955131562582411e+00  5.7489024928024435e+00  5.8023858279406415e+00
  5.8559625493152927e+00  5.9096320459175651e+00  5.9633937081605648e+00  6.0172469279525318e+00  6.0711910987700586e+00
  6.1252256157312921e+00  6.1793498756691481e+00  6.2335632772045200e+00  6.2878652208194854e+00  6.3422551089305204e+00
  6.3967323459617029e+00  6.4512963384179267e+00  6.5059464949581098e+00  6.5606822264684013e+00  6.6155029461353951e+00
  6.6704080695193353e+00  6.7253970146273270e+00  6.7804692019865493e+00  6.8356240547174556e+00  6.8908609986069944e+00
  6.9461794621818100e+00  7.0015788767814549e+00  7.0570586766315992e+00  7.1126182989172424e+00  7.1682571838559168e+00
  7.2239747747709044e+00  7.2797705181644377e+00  7.3356438637909163e+00  7.3915942647301156e+00  7.4476211774603938e+00
  7.5037240619318952e+00  7.5599023816397759e+00  7.6161556036973961e+00  7.6724831989095419e+00  7.7288846418456254e+00
  7.7853594109129025e+00  7.8419069884296748e+00  7.8985268606985075e+00  7.9552185180794242e+00  8.0119814550631325e+00
  8.0688151703442283e+00  8.1257191668944007e+00  8.1826929520356426e+00  8.2397360375134650e+00  8.2968479395700978e+00
  8.3540281790177122e+00  8.4112762813116149e+00  8.4685917766234695e+00  8.5259741999145007e+00  8.5834230910087026e+00
  8.6409379946660501e+00  8.6985184606548369e+00  8.7561640438012471e+00  8.8138743039811782e+00  8.8716488060893113e+00
  8.9294871200072965e+00  8.9873888205719457e+00  9.0453534875434176e+00  9.1033807055734162e+00  9.1614700641733773e+00
  9.2196211576826563e+00  9.2778335852367224e+00  9.3361069507353456e+00  9.3944408628107912e+00  9.4528349347960052e+00
  9.5112887846928107e+00  9.5698020351400928e+00  9.6283743133819879e+00  9.6870052512360818e+00  9.7456944850615930e+00
  9.8044416557275671e+00  9.8632464085810607e+00  9.9221083934153427e+00  9.9810272644380706e+00  1.0040002680239496e+01
  1.0099034303760645e+01  1.0158121802261507e+01  1.0217264847289233e+01  1.0276463114646322e+01  1.0335716284358810e+01
  1.0395024040644461e+01  1.0454386071880961e+01  1.0513802070574100e+01  1.0573271733325971e+01  1.0632794760803158e+01
  1.0692370857704921e+01  1.0751999732731395e+01  1.0811681098551775e+01  1.0871414671772504e+01  1.0931200172905470e+01
  1.0991037326336190e+01  1.1050925860292008e+01  1.1110865506810274e+01  1.1170856001706548e+01  1.1230897084542777e+01
  1.1290988498595492e+01  1.1351129990824006e+01  1.1411321311838584e+01  1.1471562215868655e+01  1.1531852460730988e+01
  1.1592191807797889e+01  1.1652580021965388e+01  1.1713016871621436e+01  1.1773502128614084e+01  1.1834035568219679e+01
  1.1894616969111063e+01  1.1955246113325744e+01  1.2015922786234107e+01  1.2076646776507591e+01  1.2137417876086882e+01
  1.2198235880150106e+01  1.2259100587081019e+01  1.2320011798437191e+01  1.2380969318918211e+01  1.2441972956333856e+01
  1.2503022521572305e+01  1.2564117828568309e+01  1.2625258694271393e+01  1.2686444938614041e+01  1.2747676384479892e+01
  1.2808952857671926e+01  1.2870274186880653e+01  1.2931640203652304e+01  1.2993050742357031e+01  1.3054505640157080e+01
  1.3116004736974995e+01  1.3177547875461801e+01  1.3239134900965203e+01  1.3300765661497763e+01  1.3362440007705104e+01
  1.3424157792834089e+01  1.3485918872701021e+01  1.3547723105659824e+01  1.3609570352570241e+01  1.3671460476766025e+01
  1.3733393344023121e+01  1.3795368822527857e+01  1.3857386782845149e+01  1.3919447097886675e+01  1.3981549642879067e+01
  1.4043694295332116e+01  1.4105880935006940e+01  1.4168109443884198e+01  1.4230379706132256e+01  1.4292691608075399e+01
  1.4355045038162011e+01  1.4417439886932762e+01  1.4479876046988803e+01  1.4542353412959962e+01  1.4604871881472924e+01
  1.4667431351119427e+01  1.4730031722424449e+01  1.4792672897814406e+01  1.4855354781585326e+01  1.4918077279871062e+01
  1.4980840300611463e+01  1.5043643753520575e+01  1.5106487550054828e+01  1.5169371603381224e+01  1.5232295828345531e+01
  1.5295260141440473e+01  1.5358264460773920e+01  1.5421308706037074e+01  1.5484392798472665e+01  1.5547516660843144e+01
  1.5610680217398858e+01  1.5673883393846264e+01  1.5737126117316098e+01  1.5800408316331573e+01  1.5863729920776578e+01
  1.5927090861863849e+01  1.5990491072103183e+01  1.6053930485269603e+01  1.6117409036371576e+01  1.6180926661619175e+01
  1.6244483298392289e+01  1.6308078885208811e+01  1.6371713361692819e+01  1.6435386668542776e+01  1.6499098747499712e+01
  1.6562849541315423e+01  1.6626638993720650e+01  1.6690467049393291e+01  1.6754333653926558e+01  1.6818238753797203e+01
  1.6882182296333674e+01  1.6946164229684342e+01  1.7010184502785656e+01  1.7074243065330361e+01  1.7138339867735667e+01
  1.7202474861111448e+01  1.7266647997228450e+01  1.7330859228486446e+01  1.7395108507882455e+01  1.7459395788978917e+01
  1.7523721025871893e+01  1.7588084173159253e+01  1.7652485185908851e+01  1.7716924019626749e+01  1.7781400630225367e+01
  1.7845914973991707e+01  1.7910467007555525e+01  1.7975056687857524e+01  1.8039683972117551e+01  1.8104348817802780e+01
  1.8169051182595901e+01  1.8233791024363324e+01  1.8298568301123353e+01  1.8363382971014378e+01  1.8428234992263079e+01
  1.8493124323152610e+01  1.8558050921990777e+01  1.8623014747078244e+01  1.8688015756676712e+01  1.8753053908977130e+01
  1.8818129162067855e+01  1.8883241473902856e+01  1.8948390802269920e+01  1.9013577104758820e+01  1.9078800338729515e+01
  1.9144060461280333e+01  1.9209357429216176e+01  1.9274691199016701e+01  1.9340061726804507e+01  1.9405468968313322e+01
  1.9470912878856222e+01  1.9536393413293776e+01  1.9601910526002278e+01  1.9667464170841910e+01  1.9733054301124945e+01
  1.9798680869583933e+01  1.9864343828339898e+01  1.9930043128870508e+01  1.9995778721978304e+01  2.0061550557758842e+01
  2.0127358585568928e+01  2.0193202753994775e+01  2.0259083010820209e+01  2.0324999302994861e+01  2.0390951576602347e+01
  2.0456939776828477e+01  2.0522963847929422e+01  2.0589023733199916e+01  2.0655119374941442e+01  2.0721250714430440e+01
  2.0787417691886468e+01  2.0853620246440418e+01  2.0919858316102690e+01  2.0986131837731392e+01  2.1052440747000521e+01
  2.1118784978368161e+01  2.1185164465045098e+01  2.1251579138974208e+01  2.1318028930837340e+01  2.1384513770072971e+01
  2.1451033584894297e+01  2.1517588302307306e+01  2.1584177848128867e+01  2.1650802147004807e+01  2.1717461122428006e+01
  2.1784154696756470e+01  2.1850882791231406e+01  2.1917645325995327e+01  2.1984442220110115e+01  2.2051273391575112e+01
  2.2118138757345200e+01  2.2185038233348891e+01  2.2251971734506398e+01  2.2318939174747729e+01  2.2385940467030760e+01
  2.2452975523359328e+01  2.2520044254801299e+01  2.2587146571506672e+01  2.2654282382725643e+01  2.2721451596826697e+01
  2.2788654121314682e+01  2.2855889862848905e+01  2.2923158727261210e+01  2.2990460619574055e+01  2.3057795444018591e+01
  2.3125163104052771e+01  2.3192563502379393e+01  2.3259996540964220e+01  2.3327462121054037e+01  2.3394960143194748e+01
  2.3462490507249449e+01  2.3530053112416528e+01  2.3597647857247722e+01  2.3665274639666222e+01  2.3732933356984741e+01
  2.3800623905923608e+01  2.3868346182628848e+01  2.3936100082690253e+01  2.4003885501159480e+01  2.4071702332568137e+01
  2.4139550470945839e+01  2.4207429809838324e+01  2.4275340242325509e+01  2.4343281661039597e+01  2.4411253958183138e+01
  2.4479257025547120e+01  2.4547290754529055e+01  2.4615355036151062e+01  2.4683449761077949e+01  2.4751574819635280e+01
  2.4819730101827492e+01  2.4887915497355941e+01  2.4956130895637010e+01  2.5024376185820177e+01  2.5092651256806111e+01
  2.5160955997264743e+01  2.5229290295653350e+01  2.5297654040234654e+01  2.5366047119094880e+01  2.5434469420161847e+01
  2.5502920831223072e+01  2.5571401239943818e+01  2.5639910533885203e+01  2.5708448600522274e+01  2.5777015327262085e+01
  2.5845610601461782e+01  2.5914234310446702e+01  2.5982886341528427e+01  2.6051566582022890e+01  2.6120274919268443e+01
  2.6189011240643953e+01  2.6257775433586875e+01  2.6326567385611341e+01  2.6395386984326230e+01  2.6464234117453273e+01
  2.6533108672845113e+01  2.6602010538503404e+01  2.6670939602596885e+01  2.6739895753479470e+01  2.6808878879708317e+01
  2.6877888870061923e+01  2.6946925613558214e+01  2.7015988999472611e+01  2.7085078917356107e+01  2.7154195257053384e+01
  2.7223337908720858e+01  2.7292506762844788e+01  2.7361701710259336e+01  2.7430922642164674e+01  2.7500169450145052e+01
  2.7569442026186877e+01  2.7638740262696817e+01  2.7708064052519852e+01  2.7777413288957387e+01  2.7846787865785316e+01
  2.7916187677272106e+01  2.7985612618196900e+01  2.8055062583867574e+01  2.8124537470138829e+01  2.8194037173430274e+01
  2.8263561590744516e+01  2.8333110619685229e+01  2.8402684158475253e+01  2.8472282105974656e+01  2.8541904361698837e+01
  2.8611550825836602e+01  2.8681221399268239e+01  2.8750915983583607e+01  2.8820634481100228e+01  2.8890376794881355e+01
  2.8960142828754051e+01  2.9029932487327294e+01  2.9099745676010048e+01  2.9169582301029330e+01  2.9239442269448325e+01
  2.9309325489184438e+01  2.9379231869027393e+01  2.9449161318657321e+01  2.9519113748662825e+01  2.9589089070559076e+01
  2.9659087196805888e+01  2.9729108040825814e+01  2.9799151517022210e+01  2.9869217540797337e+01  2.9939306028570421e+01
  3.0009416897795766e+01  3.0079550066980801e+01  3.0149705455704201e+01  3.0219882984633934e+01  3.0290082575545362e+01
  3.0360304151339339e+01  3.0430547636060258e+01  3.0500812954914156e+01  3.0571100034286800e+01  3.0641408801761756e+01
  3.0711739186138480e+01  3.0782091117450406e+01  3.0852464526983013e+01  3.0922859347291919e+01  3.0993275512220976e+01
  3.1063712956920313e+01  3.1134171617864467e+01  3.1204651432870435e+01  3.1275152341115756e+01  3.1345674283156626e+01
  3.1416217200945926e+01  3.1486781037851365e+01  3.1557365738673518e+01  3.1627971249663926e+01  3.1698597518543188e+01
  3.1769244494519018e+01  3.1839912128304359e+01  3.1910600372135434e+01  3.1981309179789864e+01  3.2052038506604717e+01
  3.2122788309494595e+01  3.2193558546969761e+01  3.2264349179154159e+01  3.2335160167803529e+01  3.2405991476323507e+01
  3.2476843069787655e+01  3.2547714914955598e+01  3.2618606980291084e+01  3.2689519235980065e+01  3.2760451653948778e+01
  3.2831404207881832e+01  3.2902376873240286e+01  3.2973369627279766e+01  3.3044382449068479e+01  3.3115415319505352e+01
  3.3186468221338110e+01  3.3257541139181328e+01  3.3328634059534537e+01  3.3399746970800315e+01  3.3470879863302336e+01
  3.3542032729303493e+01  3.3613205563023953e+01  3.3684398360659245e+01  3.3755611120398349e+01  3.3826843842441782e+01
  3.3898096529019668e+01  3.3969369184409835e+01  3.4040661814955875e+01  3.4111974429085258e+01  3.4183307037327388e+01
  3.4254659652331711e+01  3.4326032288885756e+01  3.4397424963933275e+01  3.4468837696592288e+01  3.4540270508173158e+01
  3.4611723422196711e+01  3.4683196464412276e+01  3.4754689662815814e+01  3.4826203047667946e+01  3.4897736651512098e+01
  3.4969290509192518e+01  3.5040864657872113e+01  3.5112459137042116e+01  3.5184073988511322e+01  3.5255709256387327e+01
  3.5327364987057337e+01  3.5399041229169065e+01  3.5470738033611610e+01  3.5542455453496316e+01  3.5614193544137656e+01
  3.5685952363034069e+01  3.5757731969848884e+01  3.5829532426391154e+01  3.5901353796596531e+01  3.5973196146508158e+01
  3.6045059544257512e+01  3.6116944060045292e+01  3.6188849766122296e+01  3.6260776736770275e+01  3.6332725048282818e+01
  3.6404694778946215e+01  3.6476686009020334e+01  3.6548698820719487e+01  3.6620733298193315e+01  3.6692789527507635e+01
  3.6764867596625329e+01  3.6836967595387215e+01  3.6909089615492917e+01  3.6981233750481728e+01  3.7053400095713478e+01
  3.7125588748349443e+01  3.7197799807333162e+01  3.7270033373371341e+01  3.7342289548914721e+01  3.7414568438138943e+01
  3.7486870146925426e+01  3.7559194782842226e+01  3.7631542455124929e+01  3.7703913274657502e+01  3.7776307353953158e+01
  3.7848724807135262e+01  3.7921165749918174e+01  3.7993630299588119e+01  3.8066118574984081e+01  3.8138630696478643e+01
  3.8211166785958888e+01  3.8283726966807258e+01  3.8356311363882419e+01  3.8428920103500133e+01  3.8501553313414149e+01
  3.8574211122797045e+01  3.8646893662221125e+01  3.8719601063639274e+01  3.8792333460365839e+01  3.8865090987057485e+01
  3.8937873779694094e+01  3.9010681975559606e+01  3.9083515713222909e+01  3.9156375132518704e+01  3.9229260374528380e+01
  3.9302171581560877e+01  3.9375108897133572e+01  3.9448072465953139e+01  3.9521062433896418e+01  3.9594078947991285e+01
  3.9667122156397554e+01  3.9740192208387789e+01  3.9813289254328240e+01  3.9886413445659677e+01  3.9959564934878252e+01
  4.0032743875516410e+01  4.0105950422123719e+01  4.0179184730247769e+01  4.0252446956415035e+01  4.0325737258111744e+01
  4.0399055793764745e+01  4.0472402722722386e+01  4.0545778205235401e+01  4.0619182402437737e+01  4.0692615476327475e+01
  4.0766077589747667e+01  4.0839568906367226e+01  4.0913089590661784e+01  4.0986639807894569e+01  4.1060219724097287e+01
  4.1133829506050979e+01  4.1207469321266892e+01  4.1281139337967360e+01  4.1354839725066675e+01  4.1428570652151933e+01
  4.1502332289463958e+01  4.1576124807878116e+01  4.1649948378885227e+01  4.1723803174572403e+01  4.1797689367603958e+01
  4.1871607131202239e+01  4.1945556639128547e+01  4.2019538065663937e+01  4.2093551585590163e+01  4.2167597374170505e+01
  4.2241675607130652e+01  4.2315786460639572e+01  4.2389930111290390e+01  4.2464106736081249e+01  4.2538316512396193e+01
  4.2612559617986022e+01  4.2686836230949183e+01  4.2761146529712626e+01  4.2835490693012673e+01  4.2909868899875917e+01
  4.2984281329600059e+01  4.3058728161734791e+01  4.3133209576062683e+01  4.3207725752580025e+01  4.3282276871477720e+01
  4.3356863113122166e+01  4.3431484658036084e+01  4.3506141686879438e+01  4.3580834380430275e+01  4.3655562919565604e+01
  4.3730327485242277e+01  4.3805128258477851e+01  4.3879965420331452e+01  4.3954839151884663e+01  4.4029749634222384e+01
  4.4104697048413719e+01  4.4179681575492822e+01  4.4254703396439773e+01  4.4329762692161481e+01  4.4404859643472527e+01
  4.4479994431076022e+01  4.4555167235544516e+01  4.4630378237300832e+01  4.4705627616598981e+01  4.4780915553504983e+01
  4.4856242227877779e+01  4.4931607819350077e+01  4.5007012507309234e+01  4.5082456470878128e+01  4.5157939888896038e+01
  4.5233462939899475e+01  4.5309025802103115e+01  4.5384628653380616e+01  4.5460271671245522e+01  4.5535955032832128e+01
  4.5611678914876329e+01  4.5687443493696534e+01  4.5763248945174482e+01  4.5839095444736181e+01  4.5914983167332707e+01
  4.5990912287421139e+01  4.6066882978945372e+01  4.6142895415317057e+01  4.6218949769396396e+01  4.6295046213473071e+01
  4.6371184919247099e+01  4.6447366057809674e+01  4.6523589799624091e+01  4.6599856314506589e+01  4.6676165771607195e+01
  4.6752518339390662e+01  4.6828914185617272e+01  4.6905353477323743e+01  4.6981836380804118e+01  4.7058363061590576e+01
  4.7134933684434372e+01  4.7211548413286664e+01  4.7288207411279380e+01  4.7364910840706145e+01  4.7441658863003070e+01
  4.7518451638729701e+01  4.7595289327549850e+01  4.7672172088212442e+01  4.7749100078532457e+01  4.7826073455371734e+01
  4.7903092374619888e+01  4.7980156991175150e+01  4.8057267458925260e+01  4.8134423930728310e+01  4.8211626558393661e+01
  4.8288875492662775e+01  4.8366170883190094e+01  4.8443512878523919e+01  4.8520901626087287e+01  4.8598337272158830e+01
  4.8675819961853641e+01  4.8753349839104175e+01  4.8830927046641079e+01  4.8908551725974093e+01  4.8986224017372912e+01
  4.9063944059848069e+01  4.9141711991131771e+01  4.9219527947658811e+01  4.9297392064547431e+01  4.9375304475580165e+01
  4.9453265313184737e+01  4.9531274708414934e+01  4.9609332790931461e+01  4.9687439688982835e+01  4.9765595529386211e+01
  4.9843800437508307e+01  4.9922054537246488e+01  5.0000357951015893e+01  5.0078710799751903e+01  5.0157113202918637e+01
  5.0235565278517704e+01  5.0314067143096892e+01  5.0392618911758930e+01  5.0471220698170193e+01  5.0549872614569452e+01
  5.0628574771776606e+01  5.0707327279201380e+01  5.0786130244852089e+01  5.0864983775344342e+01  5.0943887975909796e+01
  5.1022842950404851e+01  5.1101848801319420e+01  5.1180905629785627e+01  5.1260013535586552e+01  5.1339172617164962e+01
  5.1418382971632006e+01  5.1497644694776014e+01  5.1576957881071152e+01  5.1656322623686194e+01  5.1735739014493241e+01
  5.1815207144076460e+01  5.1894727101740784e+01  5.1974298975520682e+01  5.2053922852188848e+01  5.2133598817264961e+01
  5.2213326955024407e+01  5.2293107348506993e+01  5.2372940079525698e+01  5.2452825228675380e+01  5.2532762875341525e+01
  5.2612753097708968e+01  5.2692795972770625e+01  5.2772891576336207e+01  5.2853039983040986e+01  5.2933241266354472e+01
  5.3013495498589194e+01  5.3093802750909397e+01  5.3174163093339779e+01  5.3254576594774228e+01  5.3335043322984532e+01
  5.3415563344629135e+01  5.3496136725261856e+01  5.3576763529340596e+01  5.3657443820236097e+01  5.3738177660240666e+01
  5.3818965110576890e+01  5.3899806231406387e+01  5.3980701081838504e+01  5.4061649719939069e+01  5.4142652202739129e+01
  5.4223708586243660e+01  5.4304818925440294e+01  5.4385983274308074e+01  5.4467201685826140e+01  5.4548474211982516e+01
  5.4629800903782787e+01  5.4711181811258847e+01  5.4792616983477650e+01  5.4874106468549897e+01  5.4955650313638813e+01
  5.5037248564968820e+01  5.5118901267834318e+01  5.5200608466608401e+01  5.5282370204751558e+01  5.5364186524820440e+01
  5.5446057468476560e+01  5.5527983076495047e+01  5.5609963388773359e+01  5.5691998444340008e+01  5.5774088281363319e+01
  5.5856232937160108e+01  5.5938432448204480e+01  5.6020686850136478e+01  5.6102996177770883e+01  5.6185360465105909e+01
  5.6267779745331936e+01  5.6350254050840228e+01  5.6432783413231697e+01  5.6515367863325601e+01  5.6598007431168277e+01
  5.6680702146041888e+01  5.6763452036473133e+01  5.6846257130241980e+01  5.6929117454390408e+01  5.7012033035231127e+01
  5.7095003898356296e+01  5.7178030068646279e+01  5.7261111570278359e+01  5.7344248426735447e+01  5.7427440660814852e+01
  5.7510688294636992e+01  5.7593991349654104e+01  5.7677349846658998e+01  5.7760763805793793e+01  5.7844233246558616e+01
  5.7927758187820345e+01  5.8011338647821368e+01  5.8094974644188248e+01  5.8178666193940515e+01  5.8262413313499351e+01
  5.8346216018696374e+01  5.8430074324782282e+01  5.8513988246435673e+01  5.8597957797771713e+01  5.8681982992350882e+01
  5.8766063843187723e+01  5.8850200362759537e+01  5.8934392563015138e+01  5.9018640455383590e+01  5.9102944050782895e+01
  5.9187303359628757e+01  5.9271718391843308e+01  5.9356189156863834e+01  5.9440715663651488e+01  5.9525297920700041e+01
  5.9609935936044621e+01  5.9694629717270381e+01  5.9779379271521321e+01  5.9864184605508939e+01  5.9949045725521003e+01
  6.0033962637430250e+01  6.0118935346703154e+01  6.0203963858408613e+01  6.0289048177226725e+01  6.0374188307457466e+01
  6.0459384253029455e+01  6.0544636017508680e+01  6.0629943604107204e+01  6.0715307015691920e+01  6.0800726254793275e+01
  6.0886201323613982e+01  6.0971732224037773e+01  6.1057318957638117e+01  6.1142961525686950e+01  6.1228659929163392e+01
  6.1314414168762511e+01  6.1400224244904003e+01  6.1486090157740975e+01  6.1572011907168630e+01  6.1657989492833011e+01
  6.1744022914139748e+01  6.1830112170262773e+01  6.1916257260153031e+01  6.2002458182547230e+01  6.2088714935976576e+01
  6.2175027518775501e+01  6.2261395929090369e+01  6.2347820164888219e+01  6.2434300223965522e+01  6.2520836103956846e+01
  6.2607427802343658e+01  6.2694075316463000e+01  6.2780778643516250e+01  6.2867537780577827e+01  6.2954352724603936e+01
  6.3041223472441295e+01  6.3128150020835875e+01  6.3215132366441580e+01  6.3302170505829068e+01  6.3389264435494376e+01
  6.3476414151867722e+01  6.3563619651322206e+01  6.3650880930182552e+01  6.3738197984733823e+01  6.3825570811230158e+01
  6.3912999405903498e+01  6.4000483764972316e+01  6.4088023884650369e+01  6.4175619761155374e+01  6.4263271390717790e+01
  6.4350978769589531e+01  6.4438741894052669e+01  6.4526560760428197e+01  6.4614435365084759e+01  6.4702365704447359e+01
  6.4790351775006087e+01  6.4878393573324871e+01  6.4966491096050191e+01  6.5054644339919832e+01  6.5142853301771538e+01
  6.5231117978551879e+01  6.5319438367324821e+01  6.5407814465280566e+01  6.5496246269744262e+01  6.5584733778184713e+01
  6.5673276988223066e+01  6.5761875897641659e+01  6.5850530504392623e+01  6.5939240806606705e+01  6.6028006802601936e+01
  6.6116828490892388e+01  6.6205705870196908e+01  6.6294638939447822e+01  6.6383627697799710e+01  6.6472672144638068e+01
  6.6561772279588098e+01
  1.0000000000000000e+00  9.9999682205793528e-01  9.9999747980991605e-01  1.0000020589435548e+00  1.0000107822466433e+00
  1.0000240781572438e+00  1.0000426480260027e+00  1.0000674979285662e+00  1.0000998772429679e+00  1.0001411791772774e+00
  1.0001928397492752e+00  1.0002562377858502e+00  1.0003326246733415e+00  1.0004231351873167e+00  1.0005288325974022e+00
  1.0006507552457171e+00  1.0007899627064409e+00  1.0009475689792737e+00  1.0011247390627536e+00  1.0013226694938040e+00
  1.0015425681594039e+00  1.0017856342725078e+00  1.0020530437487065e+00  1.0023459503925041e+00  1.0026654942522941e+00
  1.0030128103186777e+00  1.0033890371587830e+00  1.0037953233124248e+00  1.0042328268965990e+00  1.0047027120209753e+00
  1.0052061450423702e+00  1.0057442908440937e+00  1.0063183100417261e+00  1.0069293591034751e+00  1.0075785918875448e+00
  1.0082671612548779e+00  1.0089962206722489e+00  1.0097669254322013e+00  1.0105804326230341e+00  1.0114379004696297e+00
  1.0123404876390443e+00  1.0132893525498357e+00  1.0142856528397350e+00  1.0153305453690400e+00  1.0164251865031622e+00
  1.0175707324116219e+00  1.0187683393656013e+00  1.0200191639701095e+00  1.0213243631666828e+00  1.0226850941123118e+00
  1.0241025140507016e+00  1.0255777801840884e+00  1.0271120495720336e+00  1.0287064791284475e+00  1.0303622256734510e+00
  1.0320804459888075e+00  1.0338622968731424e+00  1.0357089351860373e+00  1.0376215178501049e+00  1.0396012018287797e+00
  1.0416491441024514e+00  1.0437665016446782e+00  1.0459544314029843e+00  1.0482140902976209e+00  1.0505466352310737e+00
  1.0529532230983389e+00  1.0554350107971682e+00  1.0579931552364297e+00  1.0606288133367894e+00  1.0633431420266448e+00
  1.0661372982376991e+00  1.0690124389005493e+00  1.0719697209410475e+00  1.0750103012799426e+00  1.0781353368346200e+00
  1.0813459845210058e+00  1.0846434012554689e+00  1.0880287439564020e+00  1.0915031695444055e+00  1.0950678349415424e+00
  1.0987238970705195e+00  1.1024725128538679e+00  1.1063148392132549e+00  1.1102520330693939e+00  1.1142852513423609e+00
  1.1184156509519489e+00  1.1226443888180211e+00  1.1269726218608080e+00  1.1314015070009540e+00  1.1359322011593791e+00
  1.1405658612571292e+00  1.1453036442152214e+00  1.1501467069545157e+00  1.1550962063956931e+00  1.1601532994593140e+00
  1.1653191430658847e+00  1.1705948941359237e+00  1.1759817095900182e+00  1.1814807463488342e+00  1.1870931613330893e+00
  1.1928201114635235e+00  1.1986627536608694e+00  1.2046222448458266e+00  1.2106997419390579e+00  1.2168964018612041e+00
  1.2232133815328992e+00  1.2296518378747872e+00  1.2362129278075353e+00  1.2428978082518327e+00  1.2497076361283770e+00
  1.2566435683578610e+00  1.2637067618609581e+00  1.2708983735583108e+00  1.2782195603705380e+00  1.2856714792182560e+00
  1.2932552870221015e+00  1.3009721407027550e+00  1.3088231971809581e+00  1.3168096133774969e+00  1.3249325462131565e+00
  1.3331931526086707e+00  1.3415925894846734e+00  1.3501320137616610e+00  1.3588125823600297e+00  1.3676354522001801e+00
  1.3766017802026311e+00  1.3857127232881317e+00  1.3949694383777473e+00  1.4043730823927782e+00  1.4139248122545169e+00
  1.4236257848839868e+00  1.4334771572016809e+00  1.4434800861273576e+00  1.4536357285802251e+00  1.4639452414794984e+00
  1.4744097817450066e+00  1.4850305062977995e+00  1.4958085720606287e+00  1.5067451359575423e+00  1.5178413549125986e+00
  1.5290983858484553e+00  1.5405173856849605e+00  1.5520995113380192e+00  1.5638459197204821e+00  1.5757577677451173e+00
  1.5878362123278849e+00  1.6000824103912104e+00  1.6124975188666557e+00  1.6250826946929720e+00  1.6378390948092421e+00
  1.6507678761472755e+00  1.6638701956240056e+00  1.6771472101352027e+00  1.6906000765597171e+00  1.7042299517753072e+00
  1.7180379926762961e+00  1.7320253561912351e+00  1.7461931992976867e+00  1.7605426790130132e+00  1.7750749523578668e+00
  1.7897911763151808e+00  1.8046925077891480e+00  1.8197801035704759e+00  1.8350551203562875e+00  1.8505187148343252e+00
  1.8661720437781761e+00  1.8820162641425542e+00  1.8980525331448992e+00  1.9142820082226126e+00  1.9307058468389231e+00
  1.9473252062617590e+00  1.9641412433424494e+00  1.9811551143242041e+00  1.9983679749334420e+00  2.0157809808272211e+00
  2.0333952881067194e+00  2.0512120538312213e+00  2.0692324364673484e+00  2.0874575956954193e+00  2.1058886913785995e+00
  2.1245268823705663e+00  2.1433733253217424e+00  2.1624291736261898e+00  2.1816955778286675e+00  2.2011736879988142e+00
  2.2208646564997543e+00  2.2407696407606723e+00  2.2608898057442111e+00  2.2812263230995375e+00  2.3017803656963336e+00
  2.3225531011962164e+00  2.3435456856133592e+00  2.3647592575364653e+00  2.3861949398687088e+00  2.4078538524071562e+00
  2.4297371267692651e+00  2.4518459213484429e+00  2.4741814348380156e+00  2.4967449027135173e+00  2.5195375682939005e+00
  2.5425606480847311e+00  2.5658152970438013e+00  2.5893025769420173e+00  2.6130234633281586e+00  2.6369789120751346e+00
  2.6611699398448017e+00  2.6855977047585387e+00  2.7102635803833857e+00  2.7351691423296471e+00  2.7603160152885087e+00
  2.7857056862180087e+00  2.8113393169862539e+00  2.8372175714327010e+00  2.8633406401179347e+00  2.8897085917686285e+00
  2.9163218069856263e+00  2.9431814133774092e+00  2.9702896896325837e+00  2.9976500226942124e+00  3.0252661006491111e+00
  3.0531409058733963e+00  3.0812757044488137e+00  3.1096691024078358e+00  3.1383171115053838e+00  3.1672150018169973e+00
  3.1963596389234095e+00  3.2257518308191711e+00  3.2553985312803868e+00  3.2853127652965397e+00  3.3155093814112173e+00
  3.3459996298763013e+00  3.3767857155360019e+00  3.4078556573142258e+00  3.4391832623314973e+00  3.4707377988195272e+00
  3.5024964998442041e+00  3.5344571322443104e+00  3.5666499395487250e+00  3.5991386006977821e+00  3.6319996263958179e+00
  3.6652952282344837e+00  3.6990460271173906e+00  3.7332044361762931e+00  3.7676404997008075e+00  3.8021530466294067e+00
  3.8364887904776999e+00  3.8520417174871588e+00  3.7014635904302162e+00  3.5546991945095447e+00  3.4117423316919764e+00
  3.2725830614194100e+00  3.1372078113554513e+00  3.0055994881320505e+00  2.8777375880961378e+00  2.7535983080562625e+00
  2.6331546560292312e+00  2.5163765619867409e+00  2.4032309886020231e+00  2.2936820419964756e+00  2.1876910824863032e+00
  2.0852168353291525e+00  1.9862155014707525e+00  1.8906408682915496e+00  1.7984444203533463e+00  1.7095754501459379e+00
  1.6239811688337498e+00  1.5416068170024775e+00  1.4623957754057191e+00  1.3862896757116179e+00  1.3132285112494961e+00
  1.2431507477564954e+00  1.1759934341242109e+00  1.1116923131453316e+00  1.0501819322602772e+00  9.9139575430383342e-01
  9.3526626825179182e-01  8.8172509996758697e-01  8.3070312294893389e-01  7.8213056907446310e-01  7.3593713935036220e-01
  6.9205211465700911e-01  6.5040446649561368e-01  6.1092296773485222e-01  5.7353630335750427e-01  5.3817318120709290e-01
  5.0476244273452142e-01  4.7323317374470975e-01  4.4351481514323021e-01  4.1553727368295057e-01  3.8923103271066628e-01
  3.6452726291373860e-01  3.4135793306673579e-01  3.1965592077806537e-01  2.9935512323661495e-01  2.8039056795838890e-01
  2.6269852353314738e-01  2.4621661037103770e-01  2.3088391144924092e-01  2.1664108305860230e-01  2.0343046555027167e-01
  1.9119619408147168e-01  1.7988430584481274e-01  1.6944279995464670e-01  1.5982162011139733e-01  1.5097261809632231e-01
  1.4284951694235939e-01  1.3540787410497285e-01  1.2860504463299988e-01  1.2240014433949677e-01  1.1675401297258553e-01
  1.1162917738629995e-01  1.0698981471143222e-01  1.0280171552637904e-01  9.9032247027988227e-02  9.5650316202404842e-02
  9.2626332995917632e-02  8.9932173485805497e-02  8.7541143051183615e-02  8.5427939543850029e-02  8.3568616459131773e-02
  8.1940546106731474e-02  8.0522382781573490e-02  7.9294025934650389e-02  7.8236583343869237e-02  7.7332334284898038e-02
  7.6564692702011966e-02  7.5918170378939789e-02  7.5378340109710257e-02  7.4931798869498481e-02  7.4566130985472032e-02
  7.4269871307637708e-02  7.4032468379687424e-02  7.3844247609845079e-02  7.3696374441712495e-02  7.3580817525115819e-02
  7.3490311886952236e-02  7.3418322102035818e-02  7.3359005463944180e-02  7.3307175155864976e-02  7.3258263421441719e-02
  7.3208284735620785e-02  7.3153798975497134e-02  7.3091874591161260e-02  7.3020051776545220e-02  7.2936305640268886e-02
  7.2839009376486602e-02  7.2726897435733365e-02  7.2599028695770951e-02  7.2454749632434978e-02  7.2293657490480459e-02
  7.2115563454428419e-02  7.1920455819412768e-02  7.1708463162025823e-02  7.1479817511165014e-02  7.1234817520989688e-02
  7.0973793099599877e-02  7.0697084008089980e-02  7.0405036189414932e-02  7.0098001416441735e-02  6.9776336970188244e-02
  6.9440405318061990e-02  6.9090573792098972e-02  6.8727214267202547e-02  6.8350702839382160e-02  6.7961419503992246e-02
  6.7559747833970979e-02  6.7146074658079147e-02  6.6720789739138933e-02  6.6284285452272731e-02  6.5836956463142027e-02
  6.5379199406186125e-02  6.4911412562861037e-02  6.4433995539878275e-02  6.3947348947443652e-02  6.3451874077496168e-02
  6.2947972581946718e-02  6.2436046150917024e-02  6.1916496190978394e-02  6.1389723503390545e-02  6.0856127962340426e-02
  6.0316108193181048e-02  5.9770061250670296e-02  5.9218382297209736e-02  5.8661464281083459e-02  5.8099697614696869e-02
  5.7533469852815516e-02  5.6963165370803953e-02  5.6389165042864467e-02  5.5811845920275986e-02  5.5231580909632844e-02
  5.4648738451083631e-02  5.4063682196569998e-02  5.3476770688065445e-02  5.2888357035814224e-02  5.2298788596570063e-02
  5.1708406651835043e-02  5.1117546086098392e-02  5.0526535065075338e-02  4.9935694713945863e-02  4.9345338795593593e-02
  4.8755773388844584e-02  4.8167296566706111e-02  4.7580198074605562e-02  4.6994759008629178e-02  4.6411251493760936e-02
  4.5829938362121306e-02  4.5251072831206135e-02  4.4674898182125403e-02  4.4101647437985218e-02  4.3531543074864711e-02
  4.2964796961099699e-02  4.2401610522438279e-02  4.1842174938605772e-02  4.1286671339996930e-02  4.0735271004368162e-02
  4.0188135553529798e-02  3.9645417150038262e-02  3.9107258693888314e-02  3.8573794019205312e-02  3.8045148090937383e-02
  3.7521437201547679e-02  3.7002769167706596e-02  3.6489243526984003e-02  3.5980951734541453e-02  3.5477977359824428e-02
  3.4980396283254556e-02  3.4488276892921839e-02  3.4001680281276862e-02  3.3520660441823044e-02  3.3045264465808841e-02
  3.2575532738919985e-02  3.2111499137971705e-02  3.1653191227600970e-02  3.1200630456958665e-02  3.0753832356401868e-02
  3.0312806734186064e-02  2.9877557873157337e-02  2.9448084727444646e-02  2.9024381119152006e-02  2.8606435935050745e-02
  2.8194233323271711e-02  2.7787752889997502e-02  2.7386969896154700e-02  2.6991855454106081e-02  2.6602376724342850e-02
  2.6218497112176865e-02  2.5840176464432860e-02  2.5467371266140681e-02  2.5100034837227489e-02  2.4738117529210003e-02
  2.4381566921886734e-02  2.4030328020030179e-02  2.3684343450079075e-02  2.3343553656830617e-02  2.3007897100132676e-02
  2.2677310451576022e-02  2.2351728791186569e-02  2.2031085804117584e-02  2.1715313977341916e-02  2.1404344796344215e-02
  2.1098108941813166e-02  2.0796536486333731e-02  2.0499557090931497e-02  2.0207100186301310e-02  1.9919095074233714e-02
  1.9635470967499947e-02  1.9356157023502515e-02  1.9081082377917707e-02  1.8810176178338137e-02  1.8543367617915262e-02
  1.8280585969001922e-02  1.8021760616794873e-02  1.7766821092977305e-02  1.7515697109361378e-02  1.7268318591530760e-02
  1.7024615712483149e-02  1.6784518926272800e-02  1.6547959001653074e-02  1.6314867055718937e-02  1.6085174587549524e-02
  1.5858813511850645e-02  1.5635716192597331e-02  1.5415815476676354e-02  1.5199044727528758e-02  1.4985337858792396e-02
  1.4774629367944461e-02  1.4566854369944005e-02  1.4361948630874481e-02  1.4159848601586263e-02  1.3960491451339194e-02
  1.3763815101445094e-02  1.3569758258910304e-02  1.3378260450078217e-02  1.3189262054271803e-02  1.3002704337436138e-02
  1.2818529485780940e-02  1.2636680639423102e-02  1.2457101926029210e-02  1.2279738494458082e-02  1.2104536548403303e-02
  1.1931443380035741e-02  1.1760407403646093e-02  1.1591378189287406e-02  1.1424306496417611e-02  1.1259144307542046e-02
  1.1095844861856002e-02  1.0934362688887235e-02  1.0774653642138515e-02  1.0616674932730137e-02  1.0460385163042464e-02
  1.0305744360358455e-02  1.0152714010506199e-02  1.0001257091501436e-02  9.8513381071900913e-03  9.7029231208908134e-03
  9.5559797890374908e-03  9.4104773946379703e-03  9.2663868703560318e-03  9.1236807807730611e-03  8.9823332801630441e-03
  8.8423200685033548e-03  8.7036183474851932e-03  8.5662067765240220e-03  8.4300654287699957e-03  8.2951757471184003e-03
  8.1615205002200826e-03  8.0290837384918937e-03  7.8978507501271146e-03  7.7678080171058976e-03  7.6389431712056994e-03
  7.5112449500117145e-03  7.3847031529273091e-03  7.2593085971844606e-03  7.1350530738541890e-03  7.0119293038569900e-03
  6.8899308939732746e-03  6.7690522928538013e-03  6.6492887470301094e-03  6.5306362569249590e-03  6.4130915328627584e-03
  6.2966519510800050e-03  6.1813155097357186e-03  6.0670807849218730e-03  5.9539468866738384e-03  5.8419134149808082e-03
  5.7309804157962361e-03  5.6211483370482741e-03  5.5124179846502037e-03  5.4047904785108737e-03  5.2982672085451323e-03
  5.1928497906842622e-03  5.0885400228864201e-03  4.9853398411470635e-03  4.8832512755093921e-03  4.7822764060747808e-03
  4.6824173190132129e-03  4.5836760625737162e-03  4.4860546030947995e-03  4.3895547810148842e-03  4.2941782668827417e-03
  4.1999265173679251e-03  4.1068007312712075e-03  4.0148018055350190e-03  3.9239302912538725e-03  3.8341863496848053e-03
  3.7455697082578168e-03  3.6580796165862949e-03  3.5717148024774562e-03  3.4864734279427805e-03  3.4023530452084476e-03
  3.3193505530941846e-03  3.2374621660454959e-03  3.1566834211622184e-03  3.0770092028880565e-03  2.9984337685783373e-03
  2.9209507740677655e-03  2.8445532992381803e-03  2.7692338735863125e-03  2.6949845017915416e-03  2.6217966892836501e-03
  2.5496614678105827e-03  2.4785694210062016e-03  2.4085107099580433e-03  2.3394750987750746e-03  2.2714519801554510e-03
  2.2044304009542705e-03  2.1383990877513323e-03  2.0733464724188937e-03  2.0092607176894241e-03  1.9461297427233648e-03
  1.8839412486768832e-03  1.8226827442696300e-03  1.7623415713524974e-03  1.7029049304753722e-03  1.6443599064548964e-03
  1.5866934939422208e-03  1.5298926229907629e-03  1.4739441846239635e-03  1.4188350564030426e-03  1.3645521279947565e-03
  1.3110823267391543e-03  1.2584126432173353e-03  1.2065301568192025e-03  1.1554220613112245e-03  1.1050756904041866e-03
  1.0554785433209506e-03  1.0066183103642113e-03  9.5848289848425106e-04  9.1106045684669849e-04  8.6433940240028409e-04
  8.1830844544459724e-04  7.7295661519784188e-04  7.2827328536459544e-04  6.8424819970356069e-04  6.4087149759532811e-04
  5.9813373961012861e-04  5.5602593307559111e-04  5.1453955764449964e-04  4.7366659086254962e-04  4.3339953373610360e-04
  3.9373143629995019e-04  3.5465592318505634e-04  3.1616721918632969e-04  2.7826017483036927e-04  2.4093029137708832e-04
  2.0417373312751202e-04  1.6798731040497422e-04  1.3236845203047837e-04  9.7315177451989625e-05  6.2826068873726287e-05
  2.8900243385451764e-05 -4.4626749082336825e-06 -3.7262582758601178e-05 -6.9498925643501496e-05 -1.0117072563807310e-04
 -1.3227660928545067e-04 -1.6281483546747304e-04 -1.9278332327539140e-04 -2.2217967988057797e-04 -2.5100122840523363e-04
 -2.7924503579309642e-04 -3.0690794068014997e-04 -3.3398658126533126e-04 -3.6047742318123902e-04 -3.8637678736484223e-04
 -4.1168087792818787e-04 -4.3638581002910978e-04 -4.6048763774193601e-04 -4.8398238192819809e-04 -5.0686605810733808e-04
 -5.2913470432741747e-04 -5.5078440903582595e-04 -5.7181133894998806e-04 -5.9221176692807339e-04 -6.1198209983970276e-04
 -6.3111890643665811e-04 -6.4961894522359127e-04 -6.6747919232872663e-04 -6.8469686937457802e-04 -7.0126947134865154e-04
 -7.1719479447415399e-04 -7.3247096408070268e-04 -7.4709646247503271e-04 -7.6107015681170531e-04 -7.7439132696381662e-04
 -7.8705969339370454e-04 -7.9907544502365855e-04 -8.1043926710662700e-04 -8.2115236909692567e-04 -8.3121651252094633e-04
 -8.4063403884786312e-04 -8.4940789736034331e-04 -8.5754167302525431e-04 -8.6503961436437183e-04 -8.7190666132508799e-04
 -8.7814847315112010e-04 -8.8377145625321814e-04 -8.8878279207976404e-04 -8.9319046380728509e-04 -8.9700326494796597e-04
 -9.0023077562899573e-04 -9.0288333000995149e-04 -9.0497198351850673e-04 -9.0650848008613891e-04 -9.0750521938383745e-04
 -9.0797522405781136e-04 -9.0793210696519730e-04 -9.0739003840976723e-04 -9.0636371337763635e-04 -9.0486831877297110e-04
 -9.0291950065369653e-04 -9.0053333146720472e-04 -8.9772627728606222e-04 -8.9451516504371808e-04 -8.9091714977021150e-04
 -8.8694968182787980e-04 -8.8263047414706647e-04 -8.7797746946182862e-04 -8.7300880754564492e-04 -8.6774279244712389e-04
 -8.6219785972571075e-04 -8.5639254368739641e-04 -8.5034544462042453e-04 -8.4407519603099982e-04 -8.3760043187899532e-04
 -8.3093975381366095e-04 -8.2411169840933068e-04 -8.1713470440113103e-04 -8.1002707992068807e-04 -8.0280696973183626e-04
 -7.9549232246632553e-04 -7.8810085785952931e-04 -7.8065003398615257e-04 -7.7315701449593940e-04 -7.6563863584938109e-04
 -7.5811137455342387e-04 -7.5059131439717658e-04 -7.4309411368761881e-04 -7.3563497248530852e-04 -7.2822859984008985e-04
 -7.2088918102680124e-04 -7.1363034478098321e-04 -7.0646513053458562e-04 -6.9940595565167645e-04 -6.9246458266414887e-04
 -6.8565208650742972e-04 -6.7897882175618654e-04 -6.7245438986003603e-04 -6.6608760637925214e-04 -6.5988646822047285e-04
 -6.5385812087240920e-04 -6.4800882564331743e-04 -6.4234392897501592e-04 -6.3686785421668485e-04 -6.3158412460356437e-04
 -6.2649539271584457e-04 -6.2160347001256866e-04 -6.1690935636553768e-04 -6.1241326959321366e-04 -6.0811467499462377e-04
 -6.0401231488326444e-04 -6.0010423812100497e-04 -5.9638782965199151e-04 -5.9285984003655079e-04 -5.8951641498509425e-04
 -5.8635312489202203e-04 -5.8336499436962620e-04 -5.8054653178199543e-04 -5.7789175877891858e-04 -5.7539423982978831e-04
 -5.7304711175750530e-04 -5.7084311327238206e-04 -5.6877461450604693e-04 -5.6683364654534763e-04 -5.6501193096625550e-04
 -5.6330090936776911e-04 -5.6169177290581824e-04 -5.6017549182716818e-04 -5.5874284500332272e-04 -5.5738444946442885e-04
 -5.5609078993318036e-04 -5.5485224835872171e-04 -5.5365913345055179e-04 -5.5250171021242809e-04 -5.5137022947627026e-04
 -5.5025495743606448e-04 -5.4914620518176679e-04 -5.4803435823320729e-04 -5.4690990607399398e-04 -5.4576347168541664e-04
 -5.4458584108035076e-04 -5.4336799283716123e-04 -5.4210112763360639e-04 -5.4077669778074223e-04 -5.3938643675682546e-04
 -5.3792238874121828e-04 -5.3637693814829145e-04 -5.3474283916132913e-04 -5.3301324526643177e-04 -5.3118173878642075e-04
 -5.2924236041474186e-04 -5.2718963874936922e-04 -5.2501861982670942e-04 -5.2272489665550507e-04 -5.2030463875073901e-04
 -5.1775462165922729e-04 -5.1507225379086483e-04 -5.1225558214985272e-04 -5.0930327522346979e-04 -5.0621460232624081e-04
 -5.0298941292429167e-04 -4.9962811595970647e-04 -4.9613165917488289e-04 -4.9250150843688917e-04 -4.8873962706181965e-04
 -4.8484845513915159e-04 -4.8083088885610061e-04 -4.7669025982197767e-04 -4.7243031439254480e-04 -4.6805519299437134e-04
 -4.6356940944919031e-04 -4.5897783029825447e-04 -4.5428565412669250e-04 -4.4949839088786542e-04 -4.4462184122772249e-04
 -4.3966207580915751e-04 -4.3462541463636523e-04 -4.2951840637919716e-04 -4.2434780769751818e-04 -4.1912056256556242e-04
 -4.1384378159628954e-04 -4.0852472136574107e-04 -4.0317076373739646e-04 -3.9778939518652934e-04 -3.9238818612456370e-04
 -3.8697477022343006e-04 -3.8155682373992167e-04 -3.7614204484005083e-04 -3.7073813292340504e-04 -3.6535276794750289e-04
 -3.5999358975215084e-04 -3.5466817738379888e-04 -3.4938402841989708e-04 -3.4414853829325162e-04 -3.3896897961638100e-04
 -3.3385248150587227e-04 -3.2880600890673728e-04 -3.2383634191676880e-04 -3.1895005511089667e-04 -3.1415349686554422e-04
 -3.0945276868298412e-04 -3.0485370451569503e-04 -3.0036185009071724e-04 -2.9598244223400948e-04 -2.9172038819480462e-04
 -2.8758024496996603e-04 -2.8356619862834409e-04 -2.7968204363513181e-04 -2.7593116217622144e-04 -2.7231650350295806e-04
 -2.6884056601551160e-04 -2.6550539519855300e-04 -2.6231259493763258e-04 -2.5926334035965688e-04 -2.5635839067650459e-04
 -2.5359810202864200e-04 -2.5098244032873860e-04 -2.4851099410528281e-04 -2.4618298734619749e-04 -2.4399729234245558e-04
 -2.4195244253169573e-04 -2.4004664534183791e-04 -2.3827779503469897e-04 -2.3664348554960839e-04 -2.3514102334702371e-04
 -2.3376744025214630e-04 -2.3251950629853688e-04 -2.3139374257173122e-04 -2.3038643405285563e-04 -2.2949364246224271e-04
 -2.2871121910304681e-04 -2.2803481770485983e-04 -2.2745990726732667e-04 -2.2698178490376095e-04 -2.2659558868476053e-04
 -2.2629631048182321e-04 -2.2607880881096235e-04 -2.2593782167632236e-04 -2.2586797941379446e-04 -2.2586381753463220e-04
 -2.2591978956906715e-04 -2.2603027990992440e-04 -2.2618961665623826e-04 -2.2639208445686791e-04 -2.2663193735411293e-04
 -2.2690341162732891e-04 -2.2720073863654314e-04 -2.2751815766607015e-04 -2.2784992876812742e-04 -2.2819034560645082e-04
 -2.2853374829991045e-04 -2.2887453626612605e-04 -2.2920718106508273e-04 -2.2952623924274657e-04 -2.2982636517468019e-04
 -2.3010232390965839e-04 -2.3034900401328382e-04 -2.3056143041160247e-04 -2.3073477723471936e-04 -2.3086438066041422e-04
 -2.3094575175775693e-04 -2.3097458933072330e-04 -2.3094679276181056e-04 -2.3085847482892267e-04 -2.3070597267129211e-04
 -2.3048585070580387e-04 -2.3019489825295520e-04 -2.2983012673025884e-04 -2.2938876684545296e-04 -2.2886826578971128e-04
 -2.2826628443085319e-04 -2.2758069450655387e-04 -2.2680957581755435e-04 -2.2595121342087150e-04 -2.2500409482300833e-04
 -2.2396690717316393e-04 -2.2283853445644359e-04 -2.2161805468706884e-04 -2.2030473710158774e-04 -2.1889803935208469e-04
 -2.1739760469939072e-04 -2.1580325920629353e-04 -2.1411500893074757e-04 -2.1233303711908413e-04 -2.1045770139922139e-04
 -2.0848953097387461e-04 -2.0642922381376618e-04 -2.0427764385083560e-04 -2.0203581817144977e-04 -1.9970493420961292e-04
 -1.9728633694017674e-04 -1.9478152607205060e-04 -1.9219215324141139e-04 -1.8952001920491382e-04 -1.8676707103290044e-04
 -1.8393539930261173e-04 -1.8102723529139618e-04 -1.7804494816992038e-04 -1.7499104219537915e-04 -1.7186815390470559e-04
 -1.6867904930778125e-04 -1.6542662108064599e-04 -1.6211388575870843e-04 -1.5874398092995573e-04 -1.5532016242816380e-04
 -1.5184580152610748e-04 -1.4832438212877044e-04 -1.4475949796655536e-04 -1.4115484978849418e-04 -1.3751424255545788e-04
 -1.3384158263336681e-04 -1.3014087498640063e-04 -1.2641622037020859e-04 -1.2267181252511943e-04 -1.1891193536935157e-04
 -1.1514096019222313e-04 -1.1136334284736211e-04 -1.0758362090173448e-04 -1.0380640898591179e-04 -1.0003638819435657e-04
 -9.6278292450876764e-05 -9.2536894700796302e-05 -8.8816993103121465e-05 -8.5123397222707192e-05 -8.1460914222423428e-05
 -7.7834335055321447e-05 -7.4248420656800190e-05 -7.0707888136772648e-05 -6.7217396971832105e-05 -6.3781535197418560e-05
 -6.0404805599985016e-05 -5.7091611909163794e-05 -5.3846244989932948e-05 -5.0672869034782536e-05 -4.7575507755880938e-05
 -4.4558030577241276e-05 -4.1624138826887642e-05 -3.8777351929021513e-05 -3.6020993596188111e-05 -3.3358178021442600e-05
 -3.0791796070516551e-05 -2.8324501473984241e-05 -2.5958697019428989e-05 -2.3696520743609473e-05 -2.1539832124626039e-05
 -1.9490198274087149e-05 -1.7548880129275587e-05 -1.5716818645314864e-05 -1.3994620987335557e-05 -1.2382546722641596e-05
 -1.0880494012876617e-05 -9.4879858061903402e-06 -8.2041560294048688e-06 -7.0277357801810307e-06 -5.9570395191846750e-06
 -4.9899512622531071e-06 -4.1239107725612789e-06 -3.3558997527882771e-06 -2.6824280372835543e-06 -2.0995197842332819e-06
 -1.6026996678267436e-06 -1.1869790704226071e-06 -8.4684227471524978e-07 -5.7623265590115249e-07 -3.6853887384519809e-07
 -2.1658106524701090e-07 -1.1259703580730957e-07 -4.8228452394205850e-08 -1.4507035209571019e-08 -1.8407499553888288e-09
  0.0000000000000000e+00
  0.0000000000000000e+00  5.7627840774951228e+03  8.7445790077989968e+03  9.7505772982219587e+03  9.5452812796172930e+03
  8.8055529818875348e+03  8.0560772028472975e+03  7.6089498397822545e+03  7.5492032119869482e+03  7.7690754106774893e+03
  8.0466665976432387e+03  8.1632907052847731e+03  8.0019259827950946e+03  7.5721284751824887e+03  6.9894530744284320e+03
  6.4192806460935426e+03  5.9943545944130728e+03  5.7645452667004356e+03  5.7010622768324420e+03  5.7213351051710069e+03
  5.7284873758203876e+03  5.6570017518314044e+03  5.4908935234781447e+03  5.2552340309171486e+03  4.9992718006564637e+03
  4.7731951518058022e+03  4.6054029616571033e+03  4.4976711037405239e+03  4.4319314126841582e+03  4.3803071802291097e+03
  4.3176767608404780e+03  4.2318920193415261e+03  4.1241440015891430e+03  4.0047829655079481e+03  3.8878236536863724e+03
  3.7844963538282882e+03  3.6990141060639371e+03  3.6292543739380926e+03  3.5690991815027469e+03  3.5113060200449790e+03
  3.4506523724617073e+03  3.3855049713381331e+03  3.3171635891572651e+03  3.2486309849546965e+03  3.1831580608631430e+03
  3.1227681384998618e+03  3.0677516247565536e+03  3.0170988587663383e+03  2.9691247549600362e+03  2.9221857200290024e+03
  2.8753366254937068e+03  2.8284520764812683e+03  2.7819820583784717e+03  2.7366422565166981e+03  2.6930663729661169e+03
  2.6515263019030076e+03  2.6119261957809053e+03  2.5739303519058926e+03  2.5371137248343075e+03  2.5011259256220228e+03
  2.4658020072705021e+03  2.4311444885294591e+03  2.3972595390824899e+03  2.3642844427259029e+03  2.3323111551139150e+03
  2.3013452601306544e+03  2.2713220512420557e+03  2.2421374691134833e+03  2.2136823631590346e+03  2.1858766600862405e+03
  2.1586826215822311e+03  2.1320947019852856e+03  2.1061247380210129e+03  2.0807856808700994e+03  2.0560764605136997e+03
  2.0319783784287122e+03  2.0084606452473372e+03  1.9854873081883140e+03  1.9630247099718611e+03  1.9410477061217978e+03
  1.9195401278657698e+03  1.8984919590001898e+03  1.8778960467668790e+03  1.8577445777822584e+03  1.8380265082588851e+03
  1.8187277843359286e+03  1.7998326951416034e+03  1.7813253589372068e+03  1.7631912559734919e+03  1.7454181335865828e+03
  1.7279957146849065e+03  1.7109150416763500e+03  1.6941677546715105e+03  1.6777453579508167e+03  1.6616388770755991e+03
  1.6458390414443165e+03  1.6303365739189733e+03  1.6151224939275799e+03  1.6001883990614524e+03  1.5855265452758099e+03
  1.5711297357869655e+03  1.5569911734947400e+03  1.5431042990316289e+03  1.5294626448200652e+03  1.5160598063785010e+03
  1.5028894917320308e+03  1.4899455767260981e+03  1.4772221595826788e+03  1.4647136001649249e+03  1.4524145137520009e+03
  1.4403197408625967e+03  1.4284243113737498e+03  1.4167234046766937e+03  1.4052123207329159e+03  1.3938864801060929e+03
  1.3827414325182435e+03  1.3717728640933499e+03  1.3609766027462999e+03  1.3503486188277716e+03  1.3398850192766977e+03
  1.3295820386940484e+03  1.3194360283458570e+03  1.3094434440506459e+03  1.2996008394488169e+03  1.2899048656417538e+03
  1.2803522708126084e+03  1.2709398986518693e+03  1.2616646858076258e+03  1.2525236593512946e+03  1.2435139340519345e+03
  1.2346327086553806e+03  1.2258772610958029e+03  1.2172449436075999e+03  1.2087331804112496e+03  1.2003394665512396e+03
  1.1920613660788511e+03  1.1838965094799955e+03  1.1758425910447884e+03  1.1678973673529233e+03  1.1600586558377972e+03
  1.1523243327440496e+03  1.1446923305035400e+03  1.1371606353245124e+03  1.1297272857393966e+03  1.1223903710604311e+03
  1.1151480293317759e+03  1.1079984449068299e+03  1.1009398469107175e+03  1.0939705090914772e+03  1.0870887496556718e+03
  1.0802929307459574e+03  1.0735814574692488e+03  1.0669527759706250e+03  1.0604053705579354e+03  1.0539377603421983e+03
  1.0475484954791768e+03  1.0412361540770282e+03  1.0349993436469090e+03  1.0288367057403673e+03  1.0227469208230088e+03
  1.0167287130227060e+03  1.0107808517468608e+03  1.0049021433287868e+03  9.9909141732850298e+02  9.9334751187106951e+02
  9.8766925880891381e+02  9.8205547972033571e+02  9.7650500760404793e+02  9.7101671829706345e+02  9.6558956315751595e+02
  9.6022260004459861e+02  9.5491498962337903e+02  9.4966593400866816e+02  9.4447459903043364e+02  9.3934003346162899e+02
  9.3426109796923413e+02  9.2923649881791141e+02  9.2426494705899995e+02  9.1934534407184003e+02  9.1447697299942843e+02
  9.0965964401399549e+02  9.0489354484876026e+02  9.0017883574629161e+02  8.9551520256236938e+02  8.9090139869469544e+02
  8.8633497298493376e+02  8.8181278005751767e+02  8.7733198337303952e+02  8.7289112524864731e+02  8.6849120689189544e+02
  8.6413609143007977e+02  8.5983095100166224e+02  8.5557981796710555e+02  8.5138302143443343e+02  8.4723467824047702e+02
  8.4312245286335224e+02  8.3903193185504529e+02  8.3495253964293704e+02  8.3088366998674951e+02  8.2684034512543701e+02
  8.2285180405693336e+02  8.1894981475035684e+02  8.1515446473478073e+02  8.1145951378596646e+02  8.0782021333224975e+02
  8.0416174133455399e+02  8.0040924887878441e+02  7.9652187317880907e+02  7.9252762030437884e+02  7.8854761984400841e+02
  7.8476390798259763e+02  7.8134430594955438e+02  7.7836115116903477e+02  7.7570873185206392e+02  7.7306136993722430e+02
  7.6997723057772942e+02  7.6608248098039928e+02  7.6126525210641194e+02  7.5586878033953974e+02  7.5074252021124016e+02
  7.4693867187443368e+02  7.4526674859985587e+02  7.4583121769505590e+02  7.4758910284358456e+02  7.4836585495968404e+02
  7.4568288745711448e+02  7.3782164967848951e+02  7.2491991790992336e+02  7.0995044782551577e+02  6.9836436214756259e+02
  6.9603646503275581e+02  7.0684818410067066e+02  7.3020741865520711e+02  7.5889961769802267e+02  7.7932851931529854e+02
  7.7395162636164389e+02  7.2404893287604420e+02  6.1255725270428945e+02  4.2648344585135351e+02  1.5728064112360107e+02
 -2.0011870717464913e+02 -6.4840356661270312e+02 -1.1890079046275273e+03 -1.8230446656193972e+03 -2.5516124527546249e+03
 -3.3758098691673149e+03 -6.9944695706577500e+02 -6.7352503259708908e+02 -6.4811522357238607e+02 -6.2322531472432058e+02
 -5.9886232676831787e+02 -5.7503252365506250e+02 -5.5174142035219120e+02 -5.2899379115518957e+02 -5.0679367852749402e+02
 -4.8514440246979666e+02 -4.6404857041855479e+02 -4.4350808767370501e+02 -4.2352416835558091e+02 -4.0409734689103533e+02
 -3.8522749002876662e+02 -3.6691380938384890e+02 -3.4915487451146691e+02 -3.3194862650985488e+02 -3.1529239215243911e+02
 -2.9918289854918589e+02 -2.8361628833715196e+02 -2.6858813540024079e+02 -2.5409346111816174e+02 -2.4012675114459432e+02
 -2.2668197271455617e+02 -2.1375259248097490e+02 -2.0133159488046493e+02 -1.8941150102830827e+02 -1.7798438814263861e+02
 -1.6704190949783074e+02 -1.5657531490709334e+02 -1.4657547173426704e+02 -1.3703288643482460e+02 -1.2793772662607813e+02
 -1.1927984368658730e+02 -1.1104879588477461e+02 -1.0323387203674295e+02 -9.5824115693297799e+01 -8.8808349856174843e+01
 -8.2175202223468801e+01 -7.5913130964270493e+01 -7.0010451022504114e+01 -6.4455360949971421e+01 -5.9235970268598770e+01
 -5.4340327361889173e+01 -4.9756447895577388e+01 -4.5472343767490393e+01 -4.1476052586611502e+01 -3.7755667681348413e+01
 -3.4299368637005635e+01 -3.1095452362461565e+01 -2.8132364686048760e+01 -2.5398732480640028e+01 -2.2883396317935553e+01
 -2.0575443651751737e+01 -1.8464241687014557e+01 -1.6539459367304996e+01 -1.4791071002163932e+01 -1.3209355167168622e+01
 -1.1784893350406614e+01 -1.0508568422528521e+01 -9.3715629303795964e+00 -8.3653572142101744e+00 -7.4817273484649292e+00
 -6.7127429061509600e+00 -6.0507645467847402e+00 -5.4884414279178895e+00 -5.0187084402417428e+00 -4.6347832662708237e+00
 -4.3301632626050939e+00 -4.0986221657710669e+00 -3.9342066216417515e+00 -3.8312325384354158e+00 -3.7842812632932290e+00
 -3.7881955824356517e+00 -3.8380755448977744e+00 -3.9292741098434081e+00 -4.0573926174580262e+00 -4.2182760834205606e+00
 -4.4080083169540174e+00 -4.6229068624549310e+00 -4.8595177647016810e+00 -5.1146101576415655e+00 -5.3851706767567800e+00
 -5.6683976950092623e+00 -5.9616953823642209e+00 -6.2626675888927190e+00 -6.5691115514528402e+00 -6.8790114239499589e+00
 -7.1905316311756264e+00 -7.5020100462253287e+00 -7.8119509914952836e+00 -8.1190180632577214e+00 -8.4220267798153987e+00
 -8.7199370532345011e+00 -9.0118454846568579e+00 -9.2969774831905685e+00 -9.5746792083798038e+00 -9.8444093362531522e+00
 -1.0105730648950967e+01 -1.0358301447931671e+01 -1.0601866790756514e+01 -1.0836249551453513e+01 -1.1061341304460163e+01
 -1.1277093032144764e+01 -1.1483505655906928e+01 -1.1680620390856586e+01 -1.1868508924072087e+01 -1.2047263417031758e+01
 -1.2216986743101021e+01 -1.2377786515475496e+01 -1.2529774052052545e+01 -1.2673064268397091e+01 -1.2807775577176056e+01
 -1.2934029785576945e+01 -1.3051951990710545e+01 -1.3161670472997734e+01 -1.3263316587540423e+01 -1.3357024653476618e+01
 -1.3442931841319593e+01 -1.3521178058281194e+01 -1.3591905831579261e+01 -1.3655260189729164e+01 -1.3711388541819472e+01
 -1.3760440554771733e+01 -1.3802568028584378e+01 -1.3837924769560747e+01 -1.3866666461521227e+01 -1.3888950534999536e+01
 -1.3904936034423088e+01 -1.3914783483277514e+01 -1.3918654747255291e+01 -1.3916712895388487e+01 -1.3909122059165623e+01
 -1.3896047289632685e+01 -1.3877654412478217e+01 -1.3854109881102556e+01 -1.3825580627671192e+01 -1.3792233912152238e+01
 -1.3754237169338019e+01 -1.3711757853850800e+01 -1.3664963283132609e+01 -1.3614020478419199e+01 -1.3559096003698130e+01
 -1.3500355802650954e+01 -1.3437965033579555e+01 -1.3372087902316567e+01 -1.3302887493119949e+01 -1.3230525597551656e+01
 -1.3155162541340449e+01 -1.3076957009228819e+01 -1.2996065867804022e+01 -1.2912643986313245e+01 -1.2826844055462905e+01
 -1.2738816404202030e+01 -1.2648708814489806e+01 -1.2556666334047220e+01 -1.2462831087092820e+01 -1.2367342083062612e+01
 -1.2270335023314065e+01 -1.2171942105814246e+01 -1.2072291827812064e+01 -1.1971508786561065e+01 -1.1869713493190348e+01
 -1.1767022291249917e+01 -1.1663547380609986e+01 -1.1559396857385963e+01 -1.1454674755444614e+01 -1.1349481089432460e+01
 -1.1243911899326429e+01 -1.1138059296506730e+01 -1.1032011511352003e+01 -1.0925852942356689e+01 -1.0819664206770657e+01
 -1.0713522192761062e+01 -1.0607500113096457e+01 -1.0501667560353157e+01 -1.0396090563643833e+01 -1.0290831646868343e+01
 -1.0185949888486837e+01 -1.0081500982815074e+01 -9.9775373028420091e+00 -9.8741079645696050e+00 -9.7712588928748954e+00
 -9.6690328888942965e+00 -9.5674696989301591e+00 -9.4666060848795635e+00 -9.3664758961853565e+00 -9.2671101433094449e+00
 -9.1685370727283146e+00 -9.0707822434508056e+00 -8.9738686050581329e+00 -8.8778165772661470e+00 -8.7826441310098371e+00
 -8.6883668710500785e+00 -8.5949981201026322e+00 -8.5025490044893797e+00 -8.4110285413117989e+00 -8.3204437271467064e+00
 -8.2307996282642097e+00 -8.1420994723679332e+00 -8.0543447418574754e+00 -7.9675352686131058e+00 -7.8816693303027172e+00
 -7.7967437482110196e+00 -7.7127539865909656e+00 -7.6296942535374415e+00 -7.5475576033831819e+00 -7.4663360406169454e+00
 -7.3860206253239200e+00 -7.3066015801483806e+00 -7.2280683987785954e+00 -7.1504099559539611e+00 -7.0736146189943998e+00
 -6.9976703608519868e+00 -6.9225648746848281e+00 -6.8482856898497957e+00 -6.7748202786810712e+00 -6.7021561085951813e+00
 -6.6302806515313062e+00 -6.5591813890914077e+00 -6.4888458177159922e+00 -6.4192614539011190e+00 -6.3504158394566579e+00
 -6.2822965468057754e+00 -6.2148911843256718e+00 -6.1481874017295643e+00 -6.0821728954899079e+00 -6.0168354143028564e+00
 -5.9521627645939681e+00 -5.8881428160651623e+00 -5.8247635072829027e+00 -5.7620128513076363e+00 -5.6998789413644699e+00
 -5.6383499565550865e+00 -5.5774141676109146e+00 -5.5170599426875198e+00 -5.4572757532002694e+00 -5.3980501797012046e+00
 -5.3393719177971875e+00 -5.2812297841092644e+00 -5.2236127222732902e+00 -5.1665098089817860e+00 -5.1099102600670445e+00
 -5.0538034366254685e+00 -4.9981788511831660e+00 -4.9430261739027737e+00 -4.8883352388315373e+00 -4.8340960501906212e+00
 -4.7802987887056663e+00 -4.7269338179785940e+00 -4.6739916909006496e+00 -4.6214631561066817e+00 -4.5693391644706782e+00
 -4.5176108756425304e+00 -4.4662696646260525e+00 -4.4153071283982337e+00 -4.3647150925697371e+00 -4.3144856180866373e+00
 -4.2646110079734161e+00 -4.2150838141171727e+00 -4.1658968440931048e+00 -4.1170431680312118e+00 -4.0685161255242557e+00
 -4.0203093325769510e+00 -3.9724166885964087e+00 -3.9248323834238135e+00 -3.8775509044073515e+00 -3.8305670435163783e+00
 -3.7838759044968198e+00 -3.7374729100349144e+00 -3.6913538070999601e+00 -3.6455146649679495e+00 -3.5999518687689527e+00
 -3.5546621125993734e+00 -3.5096423925137308e+00 -3.4648899993960351e+00 -3.4204025117107477e+00 -3.3761777881333330e+00
 -3.3322139600603977e+00 -3.2885094239994217e+00 -3.2450628338380714e+00 -3.2018730929931127e+00 -3.1589393464389022e+00
 -3.1162609726154731e+00 -3.0738375752162108e+00 -3.0316689748551142e+00 -2.9897552006136490e+00 -2.9480964814671866e+00
 -2.9066932375910359e+00 -2.8655460715460621e+00 -2.8246557593438926e+00 -2.7840232413917168e+00 -2.7436496133166712e+00
 -2.7035361166698113e+00 -2.6636841295096811e+00 -2.6240951568654607e+00 -2.5847708210797125e+00 -2.5457128520307082e+00
 -2.5069230772343523e+00 -2.4684034118256890e+00 -2.4301558484200019e+00 -2.3921824468534978e+00 -2.3544853238035852e+00
 -2.3170666422887409e+00 -2.2799286010479589e+00 -2.2430734237997974e+00 -2.2065033483810113e+00 -2.1702206157647681e+00
 -2.1342274589584642e+00 -2.0985260917811206e+00 -2.0631186975203701e+00 -2.0280074174690377e+00 -1.9931943393413010e+00
 -1.9586814855684520e+00 -1.9244708014742360e+00 -1.8905641433297871e+00 -1.8569632662881481e+00 -1.8236698121983848e+00
 -1.7906852972992822e+00 -1.7580110997926361e+00 -1.7256484472961318e+00 -1.6935984041758068e+00 -1.6618618587581131e+00
 -1.6304395105217950e+00 -1.5993318606191964e+00 -1.5685392126887647e+00 -1.5380616785237626e+00 -1.5078991840578837e+00
 -1.4780514754296723e+00 -1.4485181251257433e+00 -1.4192985382028049e+00 -1.3903919585884816e+00 -1.3617974754609383e+00
 -1.3335140297073069e+00 -1.3055404204609138e+00 -1.2778753117173081e+00 -1.2505172390290913e+00 -1.2234646162795493e+00
 -1.1967157425350854e+00 -1.1702688089764535e+00 -1.1441219059087941e+00 -1.1182730298504713e+00 -1.0927200907007091e+00
 -1.0674609189860347e+00 -1.0424932731855143e+00 -1.0178148471348001e+00 -9.9342327750897086e-01 -9.6931615138417693e-01
 -9.4549101387808798e-01 -9.2194537586913961e-01 -8.9867672179458191e-01 -8.7568251752733073e-01 -8.5296021833161839e-01
 -8.3050727689744719e-01 -8.0832115145384342e-01 -7.8639931396091367e-01 -7.6473925838070089e-01 -7.4333850902684340e-01
 -7.2219462899303488e-01 -7.0130522866028411e-01 -6.8066797428297932e-01 -6.6028059665375061e-01 -6.4014089984713496e-01
 -6.2024677004204420e-01 -6.0059618442303053e-01 -5.8118722016035851e-01 -5.6201806346887262e-01 -5.4308701874567167e-01
 -5.2439251778657969e-01 -5.0593312908142363e-01 -4.8770756718810526e-01 -4.6971470218548234e-01 -4.5195356920504426e-01
 -4.3442337804139458e-01 -4.1712352284152904e-01 -4.0005359187292217e-01 -3.8321337737040889e-01 -3.6660288525828338e-01
 -3.5022234037718436e-01 -3.3407218116416521e-01 -3.1815305046821402e-01 -3.0246578613574904e-01 -2.8701141149013970e-01
 -2.7179112570525377e-01 -2.5680629407302930e-01 -2.4205843816507308e-01 -2.2754922588828400e-01 -2.1328046143450202e-01
 -1.9925407512418339e-01 -1.8547211314410061e-01 -1.7193672717906855e-01 -1.5865016393769601e-01 -1.4561475457216258e-01
 -1.3283290399202186e-01 -1.2030708007202918e-01 -1.0803980275399601e-01 -9.6033633042669111e-02 -8.4291161895635722e-02
 -7.2814999007254258e-02 -6.1607761486610693e-02 -5.0672062429500023e-02 -4.0010499384434114e-02 -2.9625642712674562e-02
 -1.9520023842291390e-02 -9.6961234162471037e-03 -1.5635933450673276e-04  9.0969253098268487e-03  1.8061474400352256e-02
  2.6735131073182535e-02  3.5115850098733664e-02  4.3201710369484621e-02  5.0990927493717544e-02  5.8481866495226249e-02
  6.5673054619002691e-02  7.2563194242896215e-02  7.9151175895248352e-02  8.5436091378501153e-02  9.1417246998780774e-02
  9.7094176901454471e-02  1.0246665651266258e-01  1.0753471608682529e-01  1.1229865436012290e-01  1.1675905230995116e-01
  1.2091678702035073e-01  1.2477304565341138e-01  1.2832933952665007e-01  1.3158751829636403e-01  1.3454978424695743e-01
  1.3721870668624372e-01  1.3959723644672092e-01  1.4168872049277115e-01  1.4349691607976442e-01  1.4502599651145173e-01
  1.4628054169992571e-01  1.4726552443794919e-01  1.4798629644027025e-01  1.4844857423897342e-01  1.4865842493286555e-01
  1.4862225179089764e-01  1.4834677970962185e-01  1.4783904052468377e-01  1.4710635817635065e-01  1.4615633372907436e-01
  1.4499683024509027e-01  1.4363595751205130e-01  1.4208205662469742e-01  1.4034368442056067e-01  1.3842959776970548e-01
  1.3634873771850445e-01  1.3411021348744956e-01  1.3172328632299868e-01  1.2919735320345774e-01  1.2654193039889802e-01
  1.2376663688510901e-01  1.2088117761158686e-01  1.1789532662355776e-01  1.1481891003803728e-01  1.1166178887392469e-01
  1.0843384173613309e-01  1.0514494735375450e-01  1.0180496697226074e-01  9.8423726599739664e-02  9.5010999107166538e-02
  9.1576486182711248e-02  8.8129800140080539e-02  8.4680445580895949e-02  8.1237800911106967e-02  7.7811099711439763e-02
  7.4409411961881111e-02  7.1041625120198057e-02  6.7716425054492699e-02  6.4442276829792478e-02  6.1227405348675983e-02
  5.8079775845933948e-02  5.5007074237266099e-02  5.2016687322012756e-02  4.9115682839922362e-02  4.6310789381954542e-02
  4.3608376155117701e-02  4.1014432601343305e-02  3.8534547870394509e-02  3.6173890146810869e-02  3.3937185830887902e-02
  3.1828698573692638e-02  2.9852208167084410e-02  2.8010990430688412e-02  2.6307809340814420e-02  2.4744926345910006e-02
  2.3324113368779383e-02  2.2046665985063878e-02  2.0913416736809579e-02  1.9924748581122274e-02  1.9080608473909522e-02
  1.8380521088710043e-02  1.7823602670610252e-02  1.7408575025248035e-02  1.7133779642903798e-02  1.6997191957678653e-02
  1.6996435741759911e-02  1.7128797634773717e-02  1.7391241808224978e-02  1.7780424765024460e-02  1.8292710274103147e-02
  1.8924184440113779e-02  1.9670670908219674e-02  2.0527746203970708e-02  2.1490755208266536e-02  2.2554826767407075e-02
  2.3714889438230160e-02  2.4965687368336428e-02  2.6301796311401466e-02  2.7717639777575128e-02  2.9207505318968083e-02
  3.0765560950225652e-02  3.2385871704188759e-02  3.4062416322642175e-02  3.5789104082150025e-02  3.7559791754978353e-02
  3.9368300705105087e-02  4.1208434119317176e-02  4.3073994373394875e-02  4.4958800533383352e-02  4.6856705991951374e-02
  4.8761616239837498e-02  5.0667506772383117e-02  5.2568441131152999e-02  5.4458589080642918e-02  5.6332244920074624e-02
  5.8183845930277846e-02  6.0007990955659736e-02  6.1799459121261377e-02  6.3553228684901569e-02  6.5264496024407773e-02
  6.6928694759934543e-02  6.8541515011368709e-02  7.0098922790822249e-02  7.1597179530212024e-02  7.3032861743927119e-02
  7.4402880821775624e-02  7.5704501396494581e-02  7.6935347598329012e-02  7.8093396076110891e-02  7.9176966886431596e-02
  8.0184714284472644e-02  8.1115617427939476e-02  8.1968970994098611e-02  8.2744375709917592e-02  8.3441728795308270e-02
  8.4061214319473151e-02  8.4603293470354848e-02  8.5068694737188533e-02  8.5458404006157826e-02  8.5773654569153354e-02
  8.6015917045634813e-02  8.6186889217595972e-02  8.6288485777632734e-02  8.6322827990114454e-02  8.6292233265458276e-02
  8.6199204647506661e-02  8.6046420214007935e-02  8.5836722390200001e-02  8.5573107175497182e-02  8.5258713283280163e-02
  8.4896811193789057e-02  8.4490792120119562e-02  8.4044156887322224e-02  8.3560504724604898e-02  8.3043521970638204e-02
  8.2496970691964197e-02  8.1924677214508093e-02  8.1330520568193149e-02  8.0718420844658620e-02  8.0092327468080843e-02
  7.9456207379097463e-02  7.8814033131834729e-02  7.8169770904038011e-02  7.7527368420305207e-02  7.6890742788423533e-02
  7.6263768248809233e-02  7.5650263837050549e-02  7.5053980959553596e-02  7.4478590882291640e-02  7.3927672132657246e-02
  7.3404697814417691e-02  7.2913022835773292e-02  7.2455871050519260e-02  7.2036322312310108e-02  7.1657299442027630e-02
  7.1321555108251833e-02  7.1031658620834895e-02  7.0789982637578408e-02  7.0598689784013624e-02  7.0459719197817114e-02
  7.0374774536619292e-02  7.0345320894020388e-02  7.0372589296199412e-02  7.0457582106781630e-02  7.0601078482108365e-02
  7.0803639875136284e-02  7.1065615587966535e-02  7.1387148373003598e-02  7.1768180082743757e-02  7.2208457368193465e-02
  7.2707537425917262e-02  7.3264793793715560e-02  7.3879422194932015e-02  7.4550446431390707e-02  7.5276724324963046e-02
  7.6056953707764358e-02  7.6889678460980201e-02  7.7773294602322449e-02  7.8706056422114992e-02  7.9686082668009334e-02
  8.0711362778329715e-02  8.1779763164048100e-02  8.2889033539388826e-02  8.4036813301062940e-02  8.5220637956132425e-02
  8.6437945598503860e-02  8.7686083434052112e-02  8.8962314354373517e-02  9.0263823559168968e-02  9.1587725227256458e-02
  9.2931069236213720e-02  9.4290847930650276e-02  9.5664002939109316e-02  9.7047432039599341e-02  9.8437996073755460e-02
  9.9832525909630487e-02  1.0122782945311565e-01  1.0262069870799106e-01  1.0400791688460609e-01  1.0538626555718908e-01
  1.0675253186978724e-01  1.0810351579083576e-01  1.0943603741635724e-01  1.1074694432179016e-01  1.1203311896244775e-01
  1.1329148612260605e-01  1.1451902041322197e-01  1.1571275381828104e-01  1.1686978328977478e-01  1.1798727839130795e-01
  1.1906248899033531e-01  1.2009275299902834e-01  1.2107550416377148e-01  1.2200827988947933e-01  1.2288872815517568e-01
  1.2371461030396325e-01  1.2448380110499170e-01  1.2519428858677628e-01  1.2584417386472402e-01  1.2643167096296737e-01
  1.2695510663050552e-01  1.2741292015165281e-01  1.2780366315079464e-01  1.2812599939145089e-01  1.2837870456964651e-01
  1.2856066610158981e-01  1.2867088290565801e-01  1.2870846517868997e-01  1.2867263416658681e-01  1.2856272192921953e-01
  1.2837817109964417e-01  1.2811853463762438e-01  1.2778347557746142e-01  1.2737276677013148e-01  1.2688629061973050e-01
  1.2632403881422630e-01  1.2568611205051816e-01  1.2497271975380395e-01  1.2418417979125422e-01  1.2332091817999431e-01
  1.2238346878939332e-01  1.2137247303766080e-01  1.2028867958275082e-01  1.1913294400757318e-01  1.1790622849951243e-01
  1.1660960152425397e-01  1.1524423749391767e-01  1.1381141642949892e-01  1.1231252361761708e-01  1.1074904926157121e-01
  1.0912258812670343e-01  1.0743483918006941e-01  1.0568760522441659e-01  1.0388279252646947e-01  1.0202241043952250e-01
  1.0010857102034036e-01  9.8143488640365595e-02  9.6129479591233663e-02  9.4068961684595429e-02  9.1964453846246963e-02
  8.9818575704566903e-02  8.7634047173261023e-02  8.5413688028414411e-02  8.3160417479850882e-02  8.0877253736799881e-02
  7.8567313567870736e-02  7.6233811855334427e-02  7.3880061102635272e-02  7.1509469261818073e-02  6.9125532000833642e-02
  6.6731822088727924e-02  6.4331978549568625e-02  6.1929695745872482e-02  5.9528712391537439e-02  5.7132800494279330e-02
  5.4745754227573447e-02  5.2371378732100654e-02  5.0013478846698350e-02  4.7675847768816115e-02  4.5362255644475956e-02
  4.3076438087737444e-02  4.0822084629667403e-02  3.8602827096814396e-02  3.6422227919187915e-02  3.4283768367742246e-02
  3.2190836721365058e-02  3.0146716363370785e-02  2.8154573807498532e-02  2.6217446653414897e-02  2.4338231471721386e-02
  2.2519671618466554e-02  2.0764344979162890e-02  1.9074651642308378e-02  1.7452801502412772e-02  1.5900801792528646e-02
  1.4420444546287036e-02  1.3013293989437916e-02  1.1680673860895288e-02  1.0423654663287043e-02  9.2430408430095330e-03
  8.1393578997867918e-03  7.1128394257345285e-03  6.1634140739288655e-03  5.2906924564796358e-03  4.4939539721085813e-03
  3.7721335632321172e-03  3.1238084025489218e-03  2.5471845091320773e-03  2.0400832940261127e-03  1.5999280353486980e-03
  1.2237302828968849e-03  9.0807619225827566e-04  6.4911278842688766e-04  4.4253415892350024e-04  2.8356757642101696e-04
  1.6695955087435985e-04  8.6961811155022338e-05  3.7317216190554406e-05  1.1245595608558608e-05  1.4295198854603872e-06
  0.0000000000000000e+00
  0.0000000000000000e+00  5.7627840774951228e+03  8.7445790077989968e+03  9.7505772982219587e+03  9.5452812796172930e+03
  8.8055529818875348e+03  8.0560772028472975e+03  7.6089498397822545e+03  7.5492032119869482e+03  7.7690754106774893e+03
  8.0466665976432387e+03  8.1632907052847731e+03  8.0019259827950946e+03  7.5721284751824887e+03  6.9894530744284320e+03
  6.4192806460935426e+03  5.9943545944130728e+03  5.7645452667004356e+03  5.7010622768324420e+03  5.7213351051710069e+03
  5.7284873758203876e+03  5.6570017518314044e+03  5.4908935234781447e+03  5.2552340309171486e+03  4.9992718006564637e+03
  4.7731951518058022e+03  4.6054029616571033e+03  4.4976711037405239e+03  4.4319314126841582e+03  4.3803071802291097e+03
  4.3176767608404780e+03  4.2318920193415261e+03  4.1241440015891430e+03  4.0047829655079481e+03  3.8878236536863724e+03
  3.7844963538282882e+03  3.6990141060639371e+03  3.6292543739380926e+03  3.5690991815027469e+03  3.5113060200449790e+03
  3.4506523724617073e+03  3.3855049713381331e+03  3.3171635891572651e+03  3.2486309849546965e+03  3.1831580608631430e+03
  3.1227681384998618e+03  3.0677516247565536e+03  3.0170988587663383e+03  2.9691247549600362e+03  2.9221857200290024e+03
  2.8753366254937068e+03  2.8284520764812683e+03  2.7819820583784717e+03  2.7366422565166981e+03  2.6930663729661169e+03
  2.6515263019030076e+03  2.6119261957809053e+03  2.5739303519058926e+03  2.5371137248343075e+03  2.5011259256220228e+03
  2.4658020072705021e+03  2.4311444885294591e+03  2.3972595390824899e+03  2.3642844427259029e+03  2.3323111551139150e+03
  2.3013452601306544e+03  2.2713220512420557e+03  2.2421374691134833e+03  2.2136823631590346e+03  2.1858766600862405e+03
  2.1586826215822311e+03  2.1320947019852856e+03  2.1061247380210129e+03  2.0807856808700994e+03  2.0560764605136997e+03
  2.0319783784287122e+03  2.0084606452473372e+03  1.9854873081883140e+03  1.9630247099718611e+03  1.9410477061217978e+03
  1.9195401278657698e+03  1.8984919590001898e+03  1.8778960467668790e+03  1.8577445777822584e+03  1.8380265082588851e+03
  1.8187277843359286e+03  1.7998326951416034e+03  1.7813253589372068e+03  1.7631912559734919e+03  1.7454181335865828e+03
  1.7279957146849065e+03  1.7109150416763500e+03  1.6941677546715105e+03  1.6777453579508167e+03  1.6616388770755991e+03
  1.6458390414443165e+03  1.6303365739189733e+03  1.6151224939275799e+03  1.6001883990614524e+03  1.5855265452758099e+03
  1.5711297357869655e+03  1.5569911734947400e+03  1.5431042990316289e+03  1.5294626448200652e+03  1.5160598063785010e+03
  1.5028894917320308e+03  1.4899455767260981e+03  1.4772221595826788e+03  1.4647136001649249e+03  1.4524145137520009e+03
  1.4403197408625967e+03  1.4284243113737498e+03  1.4167234046766937e+03  1.4052123207329159e+03  1.3938864801060929e+03
  1.3827414325182435e+03  1.3717728640933499e+03  1.3609766027462999e+03  1.3503486188277716e+03  1.3398850192766977e+03
  1.3295820386940484e+03  1.3194360283458570e+03  1.3094434440506459e+03  1.2996008394488169e+03  1.2899048656417538e+03
  1.2803522708126084e+03  1.2709398986518693e+03  1.2616646858076258e+03  1.2525236593512946e+03  1.2435139340519345e+03
  1.2346327086553806e+03  1.2258772610958029e+03  1.2172449436075999e+03  1.2087331804112496e+03  1.2003394665512396e+03
  1.1920613660788511e+03  1.1838965094799955e+03  1.1758425910447884e+03  1.1678973673529233e+03  1.1600586558377972e+03
  1.1523243327440496e+03  1.1446923305035400e+03  1.1371606353245124e+03  1.1297272857393966e+03  1.1223903710604311e+03
  1.1151480293317759e+03  1.1079984449068299e+03  1.1009398469107175e+03  1.0939705090914772e+03  1.0870887496556718e+03
  1.0802929307459574e+03  1.0735814574692488e+03  1.0669527759706250e+03  1.0604053705579354e+03  1.0539377603421983e+03
  1.0475484954791768e+03  1.0412361540770282e+03  1.0349993436469090e+03  1.0288367057403673e+03  1.0227469208230088e+03
  1.0167287130227060e+03  1.0107808517468608e+03  1.0049021433287868e+03  9.9909141732850298e+02  9.9334751187106951e+02
  9.8766925880891381e+02  9.8205547972033571e+02  9.7650500760404793e+02  9.7101671829706345e+02  9.6558956315751595e+02
  9.6022260004459861e+02  9.5491498962337903e+02  9.4966593400866816e+02  9.4447459903043364e+02  9.3934003346162899e+02
  9.3426109796923413e+02  9.2923649881791141e+02  9.2426494705899995e+02  9.1934534407184003e+02  9.1447697299942843e+02
  9.0965964401399549e+02  9.0489354484876026e+02  9.0017883574629161e+02  8.9551520256236938e+02  8.9090139869469544e+02
  8.8633497298493376e+02  8.8181278005751767e+02  8.7733198337303952e+02  8.7289112524864731e+02  8.6849120689189544e+02
  8.6413609143007977e+02  8.5983095100166224e+02  8.5557981796710555e+02  8.5138302143443343e+02  8.4723467824047702e+02
  8.4312245286335224e+02  8.3903193185504529e+02  8.3495253964293704e+02  8.3088366998674951e+02  8.2684034512543701e+02
  8.2285180405693336e+02  8.1894981475035684e+02  8.1515446473478073e+02  8.1145951378596646e+02  8.0782021333224975e+02
  8.0416174133455399e+02  8.0040924887878441e+02  7.9652187317880907e+02  7.9252762030437884e+02  7.8854761984400841e+02
  7.8476390798259763e+02  7.8134430594955438e+02  7.7836115116903477e+02  7.7570873185206392e+02  7.7306136993722430e+02
  7.6997723057772942e+02  7.6608248098039928e+02  7.6126525210641194e+02  7.5586878033953974e+02  7.5074252021124016e+02
  7.4693867187443368e+02  7.4526674859985587e+02  7.4583121769505590e+02  7.4758910284358456e+02  7.4836585495968404e+02
  7.4568288745711448e+02  7.3782164967848951e+02  7.2491991790992336e+02  7.0995044782551577e+02  6.9836436214756259e+02
  6.9603646503275581e+02  7.0684818410067066e+02  7.3020741865520711e+02  7.5889961769802267e+02  7.7932851931529854e+02
  7.7395162636164389e+02  7.2404893287604420e+02  6.1255725270428945e+02  4.2648344585135351e+02  1.5728064112360107e+02
 -2.0011870717464913e+02 -6.4840356661270312e+02 -1.1890079046275273e+03 -1.8230446656193972e+03 -2.5516124527546249e+03
 -3.3758098691673149e+03 -6.9944695706577500e+02 -6.7352503259708908e+02 -6.4811522357238607e+02 -6.2322531472432058e+02
 -5.9886232676831787e+02 -5.7503252365506250e+02 -5.5174142035219120e+02 -5.2899379115518957e+02 -5.0679367852749402e+02
 -4.8514440246979666e+02 -4.6404857041855479e+02 -4.4350808767370501e+02 -4.2352416835558091e+02 -4.0409734689103533e+02
 -3.8522749002876662e+02 -3.6691380938384890e+02 -3.4915487451146691e+02 -3.3194862650985488e+02 -3.1529239215243911e+02
 -2.9918289854918589e+02 -2.8361628833715196e+02 -2.6858813540024079e+02 -2.5409346111816174e+02 -2.4012675114459432e+02
 -2.2668197271455617e+02 -2.1375259248097490e+02 -2.0133159488046493e+02 -1.8941150102830827e+02 -1.7798438814263861e+02
 -1.6704190949783074e+02 -1.5657531490709334e+02 -1.4657547173426704e+02 -1.3703288643482460e+02 -1.2793772662607813e+02
 -1.1927984368658730e+02 -1.1104879588477461e+02 -1.0323387203674295e+02 -9.5824115693297799e+01 -8.8808349856174843e+01
 -8.2175202223468801e+01 -7.5913130964270493e+01 -7.0010451022504114e+01 -6.4455360949971421e+01 -5.9235970268598770e+01
 -5.4340327361889173e+01 -4.9756447895577388e+01 -4.5472343767490393e+01 -4.1476052586611502e+01 -3.7755667681348413e+01
 -3.4299368637005635e+01 -3.1095452362461565e+01 -2.8132364686048760e+01 -2.5398732480640028e+01 -2.2883396317935553e+01
 -2.0575443651751737e+01 -1.8464241687014557e+01 -1.6539459367304996e+01 -1.4791071002163932e+01 -1.3209355167168622e+01
 -1.1784893350406614e+01 -1.0508568422528521e+01 -9.3715629303795964e+00 -8.3653572142101744e+00 -7.4817273484649292e+00
 -6.7127429061509600e+00 -6.0507645467847402e+00 -5.4884414279178895e+00 -5.0187084402417428e+00 -4.6347832662708237e+00
 -4.3301632626050939e+00 -4.0986221657710669e+00 -3.9342066216417515e+00 -3.8312325384354158e+00 -3.7842812632932290e+00
 -3.7881955824356517e+00 -3.8380755448977744e+00 -3.9292741098434081e+00 -4.0573926174580262e+00 -4.2182760834205606e+00
 -4.4080083169540174e+00 -4.6229068624549310e+00 -4.8595177647016810e+00 -5.1146101576415655e+00 -5.3851706767567800e+00
 -5.6683976950092623e+00 -5.9616953823642209e+00 -6.2626675888927190e+00 -6.5691115514528402e+00 -6.8790114239499589e+00
 -7.1905316311756264e+00 -7.5020100462253287e+00 -7.8119509914952836e+00 -8.1190180632577214e+00 -8.4220267798153987e+00
 -8.7199370532345011e+00 -9.0118454846568579e+00 -9.2969774831905685e+00 -9.5746792083798038e+00 -9.8444093362531522e+00
 -1.0105730648950967e+01 -1.0358301447931671e+01 -1.0601866790756514e+01 -1.0836249551453513e+01 -1.1061341304460163e+01
 -1.1277093032144764e+01 -1.1483505655906928e+01 -1.1680620390856586e+01 -1.1868508924072087e+01 -1.2047263417031758e+01
 -1.2216986743101021e+01 -1.2377786515475496e+01 -1.2529774052052545e+01 -1.2673064268397091e+01 -1.2807775577176056e+01
 -1.2934029785576945e+01 -1.3051951990710545e+01 -1.3161670472997734e+01 -1.3263316587540423e+01 -1.3357024653476618e+01
 -1.3442931841319593e+01 -1.3521178058281194e+01 -1.3591905831579261e+01 -1.3655260189729164e+01 -1.3711388541819472e+01
 -1.3760440554771733e+01 -1.3802568028584378e+01 -1.3837924769560747e+01 -1.3866666461521227e+01 -1.3888950534999536e+01
 -1.3904936034423088e+01 -1.3914783483277514e+01 -1.3918654747255291e+01 -1.3916712895388487e+01 -1.3909122059165623e+01
 -1.3896047289632685e+01 -1.3877654412478217e+01 -1.3854109881102556e+01 -1.3825580627671192e+01 -1.3792233912152238e+01
 -1.3754237169338019e+01 -1.3711757853850800e+01 -1.3664963283132609e+01 -1.3614020478419199e+01 -1.3559096003698130e+01
 -1.3500355802650954e+01 -1.3437965033579555e+01 -1.3372087902316567e+01 -1.3302887493119949e+01 -1.3230525597551656e+01
 -1.3155162541340449e+01 -1.3076957009228819e+01 -1.2996065867804022e+01 -1.2912643986313245e+01 -1.2826844055462905e+01
 -1.2738816404202030e+01 -1.2648708814489806e+01 -1.2556666334047220e+01 -1.2462831087092820e+01 -1.2367342083062612e+01
 -1.2270335023314065e+01 -1.2171942105814246e+01 -1.2072291827812064e+01 -1.1971508786561065e+01 -1.1869713493190348e+01
 -1.1767022291249917e+01 -1.1663547380609986e+01 -1.1559396857385963e+01 -1.1454674755444614e+01 -1.1349481089432460e+01
 -1.1243911899326429e+01 -1.1138059296506730e+01 -1.1032011511352003e+01 -1.0925852942356689e+01 -1.0819664206770657e+01
 -1.0713522192761062e+01 -1.0607500113096457e+01 -1.0501667560353157e+01 -1.0396090563643833e+01 -1.0290831646868343e+01
 -1.0185949888486837e+01 -1.0081500982815074e+01 -9.9775373028420091e+00 -9.8741079645696050e+00 -9.7712588928748954e+00
 -9.6690328888942965e+00 -9.5674696989301591e+00 -9.4666060848795635e+00 -9.3664758961853565e+00 -9.2671101433094449e+00
 -9.1685370727283146e+00 -9.0707822434508056e+00 -8.9738686050581329e+00 -8.8778165772661470e+00 -8.7826441310098371e+00
 -8.6883668710500785e+00 -8.5949981201026322e+00 -8.5025490044893797e+00 -8.4110285413117989e+00 -8.3204437271467064e+00
 -8.2307996282642097e+00 -8.1420994723679332e+00 -8.0543447418574754e+00 -7.9675352686131058e+00 -7.8816693303027172e+00
 -7.7967437482110196e+00 -7.7127539865909656e+00 -7.6296942535374415e+00 -7.5475576033831819e+00 -7.4663360406169454e+00
 -7.3860206253239200e+00 -7.3066015801483806e+00 -7.2280683987785954e+00 -7.1504099559539611e+00 -7.0736146189943998e+00
 -6.9976703608519868e+00 -6.9225648746848281e+00 -6.8482856898497957e+00 -6.7748202786810712e+00 -6.7021561085951813e+00
 -6.6302806515313062e+00 -6.5591813890914077e+00 -6.4888458177159922e+00 -6.4192614539011190e+00 -6.3504158394566579e+00
 -6.2822965468057754e+00 -6.2148911843256718e+00 -6.1481874017295643e+00 -6.0821728954899079e+00 -6.0168354143028564e+00
 -5.9521627645939681e+00 -5.8881428160651623e+00 -5.8247635072829027e+00 -5.7620128513076363e+00 -5.6998789413644699e+00
 -5.6383499565550865e+00 -5.5774141676109146e+00 -5.5170599426875198e+00 -5.4572757532002694e+00 -5.3980501797012046e+00
 -5.3393719177971875e+00 -5.2812297841092644e+00 -5.2236127222732902e+00 -5.1665098089817860e+00 -5.1099102600670445e+00
 -5.0538034366254685e+00 -4.9981788511831660e+00 -4.9430261739027737e+00 -4.8883352388315373e+00 -4.8340960501906212e+00
 -4.7802987887056663e+00 -4.7269338179785940e+00 -4.6739916909006496e+00 -4.6214631561066817e+00 -4.5693391644706782e+00
 -4.5176108756425304e+00 -4.4662696646260525e+00 -4.4153071283982337e+00 -4.3647150925697371e+00 -4.3144856180866373e+00
 -4.2646110079734161e+00 -4.2150838141171727e+00 -4.1658968440931048e+00 -4.1170431680312118e+00 -4.0685161255242557e+00
 -4.0203093325769510e+00 -3.9724166885964087e+00 -3.9248323834238135e+00 -3.8775509044073515e+00 -3.8305670435163783e+00
 -3.7838759044968198e+00 -3.7374729100349144e+00 -3.6913538070999601e+00 -3.6455146649679495e+00 -3.5999518687689527e+00
 -3.5546621125993734e+00 -3.5096423925137308e+00 -3.4648899993960351e+00 -3.4204025117107477e+00 -3.3761777881333330e+00
 -3.3322139600603977e+00 -3.2885094239994217e+00 -3.2450628338380714e+00 -3.2018730929931127e+00 -3.1589393464389022e+00
 -3.1162609726154731e+00 -3.0738375752162108e+00 -3.0316689748551142e+00 -2.9897552006136490e+00 -2.9480964814671866e+00
 -2.9066932375910359e+00 -2.8655460715460621e+00 -2.8246557593438926e+00 -2.7840232413917168e+00 -2.7436496133166712e+00
 -2.7035361166698113e+00 -2.6636841295096811e+00 -2.6240951568654607e+00 -2.5847708210797125e+00 -2.5457128520307082e+00
 -2.5069230772343523e+00 -2.4684034118256890e+00 -2.4301558484200019e+00 -2.3921824468534978e+00 -2.3544853238035852e+00
 -2.3170666422887409e+00 -2.2799286010479589e+00 -2.2430734237997974e+00 -2.2065033483810113e+00 -2.1702206157647681e+00
 -2.1342274589584642e+00 -2.0985260917811206e+00 -2.0631186975203701e+00 -2.0280074174690377e+00 -1.9931943393413010e+00
 -1.9586814855684520e+00 -1.9244708014742360e+00 -1.8905641433297871e+00 -1.8569632662881481e+00 -1.8236698121983848e+00
 -1.7906852972992822e+00 -1.7580110997926361e+00 -1.7256484472961318e+00 -1.6935984041758068e+00 -1.6618618587581131e+00
 -1.6304395105217950e+00 -1.5993318606191964e+00 -1.5685392126887647e+00 -1.5380616785237626e+00 -1.5078991840578837e+00
 -1.4780514754296723e+00 -1.4485181251257433e+00 -1.4192985382028049e+00 -1.3903919585884816e+00 -1.3617974754609383e+00
 -1.3335140297073069e+00 -1.3055404204609138e+00 -1.2778753117173081e+00 -1.2505172390290913e+00 -1.2234646162795493e+00
 -1.1967157425350854e+00 -1.1702688089764535e+00 -1.1441219059087941e+00 -1.1182730298504713e+00 -1.0927200907007091e+00
 -1.0674609189860347e+00 -1.0424932731855143e+00 -1.0178148471348001e+00 -9.9342327750897086e-01 -9.6931615138417693e-01
 -9.4549101387808798e-01 -9.2194537586913961e-01 -8.9867672179458191e-01 -8.7568251752733073e-01 -8.5296021833161839e-01
 -8.3050727689744719e-01 -8.0832115145384342e-01 -7.8639931396091367e-01 -7.6473925838070089e-01 -7.4333850902684340e-01
 -7.2219462899303488e-01 -7.0130522866028411e-01 -6.8066797428297932e-01 -6.6028059665375061e-01 -6.4014089984713496e-01
 -6.2024677004204420e-01 -6.0059618442303053e-01 -5.8118722016035851e-01 -5.6201806346887262e-01 -5.4308701874567167e-01
 -5.2439251778657969e-01 -5.0593312908142363e-01 -4.8770756718810526e-01 -4.6971470218548234e-01 -4.5195356920504426e-01
 -4.3442337804139458e-01 -4.1712352284152904e-01 -4.0005359187292217e-01 -3.8321337737040889e-01 -3.6660288525828338e-01
 -3.5022234037718436e-01 -3.3407218116416521e-01 -3.1815305046821402e-01 -3.0246578613574904e-01 -2.8701141149013970e-01
 -2.7179112570525377e-01 -2.5680629407302930e-01 -2.4205843816507308e-01 -2.2754922588828400e-01 -2.1328046143450202e-01
 -1.9925407512418339e-01 -1.8547211314410061e-01 -1.7193672717906855e-01 -1.5865016393769601e-01 -1.4561475457216258e-01
 -1.3283290399202186e-01 -1.2030708007202918e-01 -1.0803980275399601e-01 -9.6033633042669111e-02 -8.4291161895635722e-02
 -7.2814999007254258e-02 -6.1607761486610693e-02 -5.0672062429500023e-02 -4.0010499384434114e-02 -2.9625642712674562e-02
 -1.9520023842291390e-02 -9.6961234162471037e-03 -1.5635933450673276e-04  9.0969253098268487e-03  1.8061474400352256e-02
  2.6735131073182535e-02  3.5115850098733664e-02  4.3201710369484621e-02  5.0990927493717544e-02  5.8481866495226249e-02
  6.5673054619002691e-02  7.2563194242896215e-02  7.9151175895248352e-02  8.5436091378501153e-02  9.1417246998780774e-02
  9.7094176901454471e-02  1.0246665651266258e-01  1.0753471608682529e-01  1.1229865436012290e-01  1.1675905230995116e-01
  1.2091678702035073e-01  1.2477304565341138e-01  1.2832933952665007e-01  1.3158751829636403e-01  1.3454978424695743e-01
  1.3721870668624372e-01  1.3959723644672092e-01  1.4168872049277115e-01  1.4349691607976442e-01  1.4502599651145173e-01
  1.4628054169992571e-01  1.4726552443794919e-01  1.4798629644027025e-01  1.4844857423897342e-01  1.4865842493286555e-01
  1.4862225179089764e-01  1.4834677970962185e-01  1.4783904052468377e-01  1.4710635817635065e-01  1.4615633372907436e-01
  1.4499683024509027e-01  1.4363595751205130e-01  1.4208205662469742e-01  1.4034368442056067e-01  1.3842959776970548e-01
  1.3634873771850445e-01  1.3411021348744956e-01  1.3172328632299868e-01  1.2919735320345774e-01  1.2654193039889802e-01
  1.2376663688510901e-01  1.2088117761158686e-01  1.1789532662355776e-01  1.1481891003803728e-01  1.1166178887392469e-01
  1.0843384173613309e-01  1.0514494735375450e-01  1.0180496697226074e-01  9.8423726599739664e-02  9.5010999107166538e-02
  9.1576486182711248e-02  8.8129800140080539e-02  8.4680445580895949e-02  8.1237800911106967e-02  7.7811099711439763e-02
  7.4409411961881111e-02  7.1041625120198057e-02  6.7716425054492699e-02  6.4442276829792478e-02  6.1227405348675983e-02
  5.8079775845933948e-02  5.5007074237266099e-02  5.2016687322012756e-02  4.9115682839922362e-02  4.6310789381954542e-02
  4.3608376155117701e-02  4.1014432601343305e-02  3.8534547870394509e-02  3.6173890146810869e-02  3.3937185830887902e-02
  3.1828698573692638e-02  2.9852208167084410e-02  2.8010990430688412e-02  2.6307809340814420e-02  2.4744926345910006e-02
  2.3324113368779383e-02  2.2046665985063878e-02  2.0913416736809579e-02  1.9924748581122274e-02  1.9080608473909522e-02
  1.8380521088710043e-02  1.7823602670610252e-02  1.7408575025248035e-02  1.7133779642903798e-02  1.6997191957678653e-02
  1.6996435741759911e-02  1.7128797634773717e-02  1.7391241808224978e-02  1.7780424765024460e-02  1.8292710274103147e-02
  1.8924184440113779e-02  1.9670670908219674e-02  2.0527746203970708e-02  2.1490755208266536e-02  2.2554826767407075e-02
  2.3714889438230160e-02  2.4965687368336428e-02  2.6301796311401466e-02  2.7717639777575128e-02  2.9207505318968083e-02
  3.0765560950225652e-02  3.2385871704188759e-02  3.4062416322642175e-02  3.5789104082150025e-02  3.7559791754978353e-02
  3.9368300705105087e-02  4.1208434119317176e-02  4.3073994373394875e-02  4.4958800533383352e-02  4.6856705991951374e-02
  4.8761616239837498e-02  5.0667506772383117e-02  5.2568441131152999e-02  5.4458589080642918e-02  5.6332244920074624e-02
  5.8183845930277846e-02  6.0007990955659736e-02  6.1799459121261377e-02  6.3553228684901569e-02  6.5264496024407773e-02
  6.6928694759934543e-02  6.8541515011368709e-02  7.0098922790822249e-02  7.1597179530212024e-02  7.3032861743927119e-02
  7.4402880821775624e-02  7.5704501396494581e-02  7.6935347598329012e-02  7.8093396076110891e-02  7.9176966886431596e-02
  8.0184714284472644e-02  8.1115617427939476e-02  8.1968970994098611e-02  8.2744375709917592e-02  8.3441728795308270e-02
  8.4061214319473151e-02  8.4603293470354848e-02  8.5068694737188533e-02  8.5458404006157826e-02  8.5773654569153354e-02
  8.6015917045634813e-02  8.6186889217595972e-02  8.6288485777632734e-02  8.6322827990114454e-02  8.6292233265458276e-02
  8.6199204647506661e-02  8.6046420214007935e-02  8.5836722390200001e-02  8.5573107175497182e-02  8.5258713283280163e-02
  8.4896811193789057e-02  8.4490792120119562e-02  8.4044156887322224e-02  8.3560504724604898e-02  8.3043521970638204e-02
  8.2496970691964197e-02  8.1924677214508093e-02  8.1330520568193149e-02  8.0718420844658620e-02  8.0092327468080843e-02
  7.9456207379097463e-02  7.8814033131834729e-02  7.8169770904038011e-02  7.7527368420305207e-02  7.6890742788423533e-02
  7.6263768248809233e-02  7.5650263837050549e-02  7.5053980959553596e-02  7.4478590882291640e-02  7.3927672132657246e-02
  7.3404697814417691e-02  7.2913022835773292e-02  7.2455871050519260e-02  7.2036322312310108e-02  7.1657299442027630e-02
  7.1321555108251833e-02  7.1031658620834895e-02  7.0789982637578408e-02  7.0598689784013624e-02  7.0459719197817114e-02
  7.0374774536619292e-02  7.0345320894020388e-02  7.0372589296199412e-02  7.0457582106781630e-02  7.0601078482108365e-02
  7.0803639875136284e-02  7.1065615587966535e-02  7.1387148373003598e-02  7.1768180082743757e-02  7.2208457368193465e-02
  7.2707537425917262e-02  7.3264793793715560e-02  7.3879422194932015e-02  7.4550446431390707e-02  7.5276724324963046e-02
  7.6056953707764358e-02  7.6889678460980201e-02  7.7773294602322449e-02  7.8706056422114992e-02  7.9686082668009334e-02
  8.0711362778329715e-02  8.1779763164048100e-02  8.2889033539388826e-02  8.4036813301062940e-02  8.5220637956132425e-02
  8.6437945598503860e-02  8.7686083434052112e-02  8.8962314354373517e-02  9.0263823559168968e-02  9.1587725227256458e-02
  9.2931069236213720e-02  9.4290847930650276e-02  9.5664002939109316e-02  9.7047432039599341e-02  9.8437996073755460e-02
  9.9832525909630487e-02  1.0122782945311565e-01  1.0262069870799106e-01  1.0400791688460609e-01  1.0538626555718908e-01
  1.0675253186978724e-01  1.0810351579083576e-01  1.0943603741635724e-01  1.1074694432179016e-01  1.1203311896244775e-01
  1.1329148612260605e-01  1.1451902041322197e-01  1.1571275381828104e-01  1.1686978328977478e-01  1.1798727839130795e-01
  1.1906248899033531e-01  1.2009275299902834e-01  1.2107550416377148e-01  1.2200827988947933e-01  1.2288872815517568e-01
  1.2371461030396325e-01  1.2448380110499170e-01  1.2519428858677628e-01  1.2584417386472402e-01  1.2643167096296737e-01
  1.2695510663050552e-01  1.2741292015165281e-01  1.2780366315079464e-01  1.2812599939145089e-01  1.2837870456964651e-01
  1.2856066610158981e-01  1.2867088290565801e-01  1.2870846517868997e-01  1.2867263416658681e-01  1.2856272192921953e-01
  1.2837817109964417e-01  1.2811853463762438e-01  1.2778347557746142e-01  1.2737276677013148e-01  1.2688629061973050e-01
  1.2632403881422630e-01  1.2568611205051816e-01  1.2497271975380395e-01  1.2418417979125422e-01  1.2332091817999431e-01
  1.2238346878939332e-01  1.2137247303766080e-01  1.2028867958275082e-01  1.1913294400757318e-01  1.1790622849951243e-01
  1.1660960152425397e-01  1.1524423749391767e-01  1.1381141642949892e-01  1.1231252361761708e-01  1.1074904926157121e-01
  1.0912258812670343e-01  1.0743483918006941e-01  1.0568760522441659e-01  1.0388279252646947e-01  1.0202241043952250e-01
  1.0010857102034036e-01  9.8143488640365595e-02  9.6129479591233663e-02  9.4068961684595429e-02  9.1964453846246963e-02
  8.9818575704566903e-02  8.7634047173261023e-02  8.5413688028414411e-02  8.3160417479850882e-02  8.0877253736799881e-02
  7.8567313567870736e-02  7.6233811855334427e-02  7.3880061102635272e-02  7.1509469261818073e-02  6.9125532000833642e-02
  6.6731822088727924e-02  6.4331978549568625e-02  6.1929695745872482e-02  5.9528712391537439e-02  5.7132800494279330e-02
  5.4745754227573447e-02  5.2371378732100654e-02  5.0013478846698350e-02  4.7675847768816115e-02  4.5362255644475956e-02
  4.3076438087737444e-02  4.0822084629667403e-02  3.8602827096814396e-02  3.6422227919187915e-02  3.4283768367742246e-02
  3.2190836721365058e-02  3.0146716363370785e-02  2.8154573807498532e-02  2.6217446653414897e-02  2.4338231471721386e-02
  2.2519671618466554e-02  2.0764344979162890e-02  1.9074651642308378e-02  1.7452801502412772e-02  1.5900801792528646e-02
  1.4420444546287036e-02  1.3013293989437916e-02  1.1680673860895288e-02  1.0423654663287043e-02  9.2430408430095330e-03
  8.1393578997867918e-03  7.1128394257345285e-03  6.1634140739288655e-03  5.2906924564796358e-03  4.4939539721085813e-03
  3.7721335632321172e-03  3.1238084025489218e-03  2.5471845091320773e-03  2.0400832940261127e-03  1.5999280353486980e-03
  1.2237302828968849e-03  9.0807619225827566e-04  6.4911278842688766e-04  4.4253415892350024e-04  2.8356757642101696e-04
  1.6695955087435985e-04  8.6961811155022338e-05  3.7317216190554406e-05  1.1245595608558608e-05  1.4295198854603872e-06
  0.0000000000000000e+00
  0.0000000000000000e+00  5.7627840774951228e+03  8.7445790077989968e+03  9.7505772982219587e+03  9.5452812796172930e+03
  8.8055529818875348e+03  8.0560772028472975e+03  7.6089498397822545e+03  7.5492032119869482e+03  7.7690754106774893e+03
  8.0466665976432387e+03  8.1632907052847731e+03  8.0019259827950946e+03  7.5721284751824887e+03  6.9894530744284320e+03
  6.4192806460935426e+03  5.9943545944130728e+03  5.7645452667004356e+03  5.7010622768324420e+03  5.7213351051710069e+03
  5.7284873758203876e+03  5.6570017518314044e+03  5.4908935234781447e+03  5.2552340309171486e+03  4.9992718006564637e+03
  4.7731951518058022e+03  4.6054029616571033e+03  4.4976711037405239e+03  4.4319314126841582e+03  4.3803071802291097e+03
  4.3176767608404780e+03  4.2318920193415261e+03  4.1241440015891430e+03  4.0047829655079481e+03  3.8878236536863724e+03
  3.7844963538282882e+03  3.6990141060639371e+03  3.6292543739380926e+03  3.5690991815027469e+03  3.5113060200449790e+03
  3.4506523724617073e+03  3.3855049713381331e+03  3.3171635891572651e+03  3.2486309849546965e+03  3.1831580608631430e+03
  3.1227681384998618e+03  3.0677516247565536e+03  3.0170988587663383e+03  2.9691247549600362e+03  2.9221857200290024e+03
  2.8753366254937068e+03  2.8284520764812683e+03  2.7819820583784717e+03  2.7366422565166981e+03  2.6930663729661169e+03
  2.6515263019030076e+03  2.6119261957809053e+03  2.5739303519058926e+03  2.5371137248343075e+03  2.5011259256220228e+03
  2.4658020072705021e+03  2.4311444885294591e+03  2.3972595390824899e+03  2.3642844427259029e+03  2.3323111551139150e+03
  2.3013452601306544e+03  2.2713220512420557e+03  2.2421374691134833e+03  2.2136823631590346e+03  2.1858766600862405e+03
  2.1586826215822311e+03  2.1320947019852856e+03  2.1061247380210129e+03  2.0807856808700994e+03  2.0560764605136997e+03
  2.0319783784287122e+03  2.0084606452473372e+03  1.9854873081883140e+03  1.9630247099718611e+03  1.9410477061217978e+03
  1.9195401278657698e+03  1.8984919590001898e+03  1.8778960467668790e+03  1.8577445777822584e+03  1.8380265082588851e+03
  1.8187277843359286e+03  1.7998326951416034e+03  1.7813253589372068e+03  1.7631912559734919e+03  1.7454181335865828e+03
  1.7279957146849065e+03  1.7109150416763500e+03  1.6941677546715105e+03  1.6777453579508167e+03  1.6616388770755991e+03
  1.6458390414443165e+03  1.6303365739189733e+03  1.6151224939275799e+03  1.6001883990614524e+03  1.5855265452758099e+03
  1.5711297357869655e+03  1.5569911734947400e+03  1.5431042990316289e+03  1.5294626448200652e+03  1.5160598063785010e+03
  1.5028894917320308e+03  1.4899455767260981e+03  1.4772221595826788e+03  1.4647136001649249e+03  1.4524145137520009e+03
  1.4403197408625967e+03  1.4284243113737498e+03  1.4167234046766937e+03  1.4052123207329159e+03  1.3938864801060929e+03
  1.3827414325182435e+03  1.3717728640933499e+03  1.3609766027462999e+03  1.3503486188277716e+03  1.3398850192766977e+03
  1.3295820386940484e+03  1.3194360283458570e+03  1.3094434440506459e+03  1.2996008394488169e+03  1.2899048656417538e+03
  1.2803522708126084e+03  1.2709398986518693e+03  1.2616646858076258e+03  1.2525236593512946e+03  1.2435139340519345e+03
  1.2346327086553806e+03  1.2258772610958029e+03  1.2172449436075999e+03  1.2087331804112496e+03  1.2003394665512396e+03
  1.1920613660788511e+03  1.1838965094799955e+03  1.1758425910447884e+03  1.1678973673529233e+03  1.1600586558377972e+03
  1.1523243327440496e+03  1.1446923305035400e+03  1.1371606353245124e+03  1.1297272857393966e+03  1.1223903710604311e+03
  1.1151480293317759e+03  1.1079984449068299e+03  1.1009398469107175e+03  1.0939705090914772e+03  1.0870887496556718e+03
  1.0802929307459574e+03  1.0735814574692488e+03  1.0669527759706250e+03  1.0604053705579354e+03  1.0539377603421983e+03
  1.0475484954791768e+03  1.0412361540770282e+03  1.0349993436469090e+03  1.0288367057403673e+03  1.0227469208230088e+03
  1.0167287130227060e+03  1.0107808517468608e+03  1.0049021433287868e+03  9.9909141732850298e+02  9.9334751187106951e+02
  9.8766925880891381e+02  9.8205547972033571e+02  9.7650500760404793e+02  9.7101671829706345e+02  9.6558956315751595e+02
  9.6022260004459861e+02  9.5491498962337903e+02  9.4966593400866816e+02  9.4447459903043364e+02  9.3934003346162899e+02
  9.3426109796923413e+02  9.2923649881791141e+02  9.2426494705899995e+02  9.1934534407184003e+02  9.1447697299942843e+02
  9.0965964401399549e+02  9.0489354484876026e+02  9.0017883574629161e+02  8.9551520256236938e+02  8.9090139869469544e+02
  8.8633497298493376e+02  8.8181278005751767e+02  8.7733198337303952e+02  8.7289112524864731e+02  8.6849120689189544e+02
  8.6413609143007977e+02  8.5983095100166224e+02  8.5557981796710555e+02  8.5138302143443343e+02  8.4723467824047702e+02
  8.4312245286335224e+02  8.3903193185504529e+02  8.3495253964293704e+02  8.3088366998674951e+02  8.2684034512543701e+02
  8.2285180405693336e+02  8.1894981475035684e+02  8.1515446473478073e+02  8.1145951378596646e+02  8.0782021333224975e+02
  8.0416174133455399e+02  8.0040924887878441e+02  7.9652187317880907e+02  7.9252762030437884e+02  7.8854761984400841e+02
  7.8476390798259763e+02  7.8134430594955438e+02  7.7836115116903477e+02  7.7570873185206392e+02  7.7306136993722430e+02
  7.6997723057772942e+02  7.6608248098039928e+02  7.6126525210641194e+02  7.5586878033953974e+02  7.5074252021124016e+02
  7.4693867187443368e+02  7.4526674859985587e+02  7.4583121769505590e+02  7.4758910284358456e+02  7.4836585495968404e+02
  7.4568288745711448e+02  7.3782164967848951e+02  7.2491991790992336e+02  7.0995044782551577e+02  6.9836436214756259e+02
  6.9603646503275581e+02  7.0684818410067066e+02  7.3020741865520711e+02  7.5889961769802267e+02  7.7932851931529854e+02
  7.7395162636164389e+02  7.2404893287604420e+02  6.1255725270428945e+02  4.2648344585135351e+02  1.5728064112360107e+02
 -2.0011870717464913e+02 -6.4840356661270312e+02 -1.1890079046275273e+03 -1.8230446656193972e+03 -2.5516124527546249e+03
 -3.3758098691673149e+03 -6.9944695706577500e+02 -6.7352503259708908e+02 -6.4811522357238607e+02 -6.2322531472432058e+02
 -5.9886232676831787e+02 -5.7503252365506250e+02 -5.5174142035219120e+02 -5.2899379115518957e+02 -5.0679367852749402e+02
 -4.8514440246979666e+02 -4.6404857041855479e+02 -4.4350808767370501e+02 -4.2352416835558091e+02 -4.0409734689103533e+02
 -3.8522749002876662e+02 -3.6691380938384890e+02 -3.4915487451146691e+02 -3.3194862650985488e+02 -3.1529239215243911e+02
 -2.9918289854918589e+02 -2.8361628833715196e+02 -2.6858813540024079e+02 -2.5409346111816174e+02 -2.4012675114459432e+02
 -2.2668197271455617e+02 -2.1375259248097490e+02 -2.0133159488046493e+02 -1.8941150102830827e+02 -1.7798438814263861e+02
 -1.6704190949783074e+02 -1.5657531490709334e+02 -1.4657547173426704e+02 -1.3703288643482460e+02 -1.2793772662607813e+02
 -1.1927984368658730e+02 -1.1104879588477461e+02 -1.0323387203674295e+02 -9.5824115693297799e+01 -8.8808349856174843e+01
 -8.2175202223468801e+01 -7.5913130964270493e+01 -7.0010451022504114e+01 -6.4455360949971421e+01 -5.9235970268598770e+01
 -5.4340327361889173e+01 -4.9756447895577388e+01 -4.5472343767490393e+01 -4.1476052586611502e+01 -3.7755667681348413e+01
 -3.4299368637005635e+01 -3.1095452362461565e+01 -2.8132364686048760e+01 -2.5398732480640028e+01 -2.2883396317935553e+01
 -2.0575443651751737e+01 -1.8464241687014557e+01 -1.6539459367304996e+01 -1.4791071002163932e+01 -1.3209355167168622e+01
 -1.1784893350406614e+01 -1.0508568422528521e+01 -9.3715629303795964e+00 -8.3653572142101744e+00 -7.4817273484649292e+00
 -6.7127429061509600e+00 -6.0507645467847402e+00 -5.4884414279178895e+00 -5.0187084402417428e+00 -4.6347832662708237e+00
 -4.3301632626050939e+00 -4.0986221657710669e+00 -3.9342066216417515e+00 -3.8312325384354158e+00 -3.7842812632932290e+00
 -3.7881955824356517e+00 -3.8380755448977744e+00 -3.9292741098434081e+00 -4.0573926174580262e+00 -4.2182760834205606e+00
 -4.4080083169540174e+00 -4.6229068624549310e+00 -4.8595177647016810e+00 -5.1146101576415655e+00 -5.3851706767567800e+00
 -5.6683976950092623e+00 -5.9616953823642209e+00 -6.2626675888927190e+00 -6.5691115514528402e+00 -6.8790114239499589e+00
 -7.1905316311756264e+00 -7.5020100462253287e+00 -7.8119509914952836e+00 -8.1190180632577214e+00 -8.4220267798153987e+00
 -8.7199370532345011e+00 -9.0118454846568579e+00 -9.2969774831905685e+00 -9.5746792083798038e+00 -9.8444093362531522e+00
 -1.0105730648950967e+01 -1.0358301447931671e+01 -1.0601866790756514e+01 -1.0836249551453513e+01 -1.1061341304460163e+01
 -1.1277093032144764e+01 -1.1483505655906928e+01 -1.1680620390856586e+01 -1.1868508924072087e+01 -1.2047263417031758e+01
 -1.2216986743101021e+01 -1.2377786515475496e+01 -1.2529774052052545e+01 -1.2673064268397091e+01 -1.2807775577176056e+01
 -1.2934029785576945e+01 -1.3051951990710545e+01 -1.3161670472997734e+01 -1.3263316587540423e+01 -1.3357024653476618e+01
 -1.3442931841319593e+01 -1.3521178058281194e+01 -1.3591905831579261e+01 -1.3655260189729164e+01 -1.3711388541819472e+01
 -1.3760440554771733e+01 -1.3802568028584378e+01 -1.3837924769560747e+01 -1.3866666461521227e+01 -1.3888950534999536e+01
 -1.3904936034423088e+01 -1.3914783483277514e+01 -1.3918654747255291e+01 -1.3916712895388487e+01 -1.3909122059165623e+01
 -1.3896047289632685e+01 -1.3877654412478217e+01 -1.3854109881102556e+01 -1.3825580627671192e+01 -1.3792233912152238e+01
 -1.3754237169338019e+01 -1.3711757853850800e+01 -1.3664963283132609e+01 -1.3614020478419199e+01 -1.3559096003698130e+01
 -1.3500355802650954e+01 -1.3437965033579555e+01 -1.3372087902316567e+01 -1.3302887493119949e+01 -1.3230525597551656e+01
 -1.3155162541340449e+01 -1.3076957009228819e+01 -1.2996065867804022e+01 -1.2912643986313245e+01 -1.2826844055462905e+01
 -1.2738816404202030e+01 -1.2648708814489806e+01 -1.2556666334047220e+01 -1.2462831087092820e+01 -1.2367342083062612e+01
 -1.2270335023314065e+01 -1.2171942105814246e+01 -1.2072291827812064e+01 -1.1971508786561065e+01 -1.1869713493190348e+01
 -1.1767022291249917e+01 -1.1663547380609986e+01 -1.1559396857385963e+01 -1.1454674755444614e+01 -1.1349481089432460e+01
 -1.1243911899326429e+01 -1.1138059296506730e+01 -1.1032011511352003e+01 -1.0925852942356689e+01 -1.0819664206770657e+01
 -1.0713522192761062e+01 -1.0607500113096457e+01 -1.0501667560353157e+01 -1.0396090563643833e+01 -1.0290831646868343e+01
 -1.0185949888486837e+01 -1.0081500982815074e+01 -9.9775373028420091e+00 -9.8741079645696050e+00 -9.7712588928748954e+00
 -9.6690328888942965e+00 -9.5674696989301591e+00 -9.4666060848795635e+00 -9.3664758961853565e+00 -9.2671101433094449e+00
 -9.1685370727283146e+00 -9.0707822434508056e+00 -8.9738686050581329e+00 -8.8778165772661470e+00 -8.7826441310098371e+00
 -8.6883668710500785e+00 -8.5949981201026322e+00 -8.5025490044893797e+00 -8.4110285413117989e+00 -8.3204437271467064e+00
 -8.2307996282642097e+00 -8.1420994723679332e+00 -8.0543447418574754e+00 -7.9675352686131058e+00 -7.8816693303027172e+00
 -7.7967437482110196e+00 -7.7127539865909656e+00 -7.6296942535374415e+00 -7.5475576033831819e+00 -7.4663360406169454e+00
 -7.3860206253239200e+00 -7.3066015801483806e+00 -7.2280683987785954e+00 -7.1504099559539611e+00 -7.0736146189943998e+00
 -6.9976703608519868e+00 -6.9225648746848281e+00 -6.8482856898497957e+00 -6.7748202786810712e+00 -6.7021561085951813e+00
 -6.6302806515313062e+00 -6.5591813890914077e+00 -6.4888458177159922e+00 -6.4192614539011190e+00 -6.3504158394566579e+00
 -6.2822965468057754e+00 -6.2148911843256718e+00 -6.1481874017295643e+00 -6.0821728954899079e+00 -6.0168354143028564e+00
 -5.9521627645939681e+00 -5.8881428160651623e+00 -5.8247635072829027e+00 -5.7620128513076363e+00 -5.6998789413644699e+00
 -5.6383499565550865e+00 -5.5774141676109146e+00 -5.5170599426875198e+00 -5.4572757532002694e+00 -5.3980501797012046e+00
 -5.3393719177971875e+00 -5.2812297841092644e+00 -5.2236127222732902e+00 -5.1665098089817860e+00 -5.1099102600670445e+00
 -5.0538034366254685e+00 -4.9981788511831660e+00 -4.9430261739027737e+00 -4.8883352388315373e+00 -4.8340960501906212e+00
 -4.7802987887056663e+00 -4.7269338179785940e+00 -4.6739916909006496e+00 -4.6214631561066817e+00 -4.5693391644706782e+00
 -4.5176108756425304e+00 -4.4662696646260525e+00 -4.4153071283982337e+00 -4.3647150925697371e+00 -4.3144856180866373e+00
 -4.2646110079734161e+00 -4.2150838141171727e+00 -4.1658968440931048e+00 -4.1170431680312118e+00 -4.0685161255242557e+00
 -4.0203093325769510e+00 -3.9724166885964087e+00 -3.9248323834238135e+00 -3.8775509044073515e+00 -3.8305670435163783e+00
 -3.7838759044968198e+00 -3.7374729100349144e+00 -3.6913538070999601e+00 -3.6455146649679495e+00 -3.5999518687689527e+00
 -3.5546621125993734e+00 -3.5096423925137308e+00 -3.4648899993960351e+00 -3.4204025117107477e+00 -3.3761777881333330e+00
 -3.3322139600603977e+00 -3.2885094239994217e+00 -3.2450628338380714e+00 -3.2018730929931127e+00 -3.1589393464389022e+00
 -3.1162609726154731e+00 -3.0738375752162108e+00 -3.0316689748551142e+00 -2.9897552006136490e+00 -2.9480964814671866e+00
 -2.9066932375910359e+00 -2.8655460715460621e+00 -2.8246557593438926e+00 -2.7840232413917168e+00 -2.7436496133166712e+00
 -2.7035361166698113e+00 -2.6636841295096811e+00 -2.6240951568654607e+00 -2.5847708210797125e+00 -2.5457128520307082e+00
 -2.5069230772343523e+00 -2.4684034118256890e+00 -2.4301558484200019e+00 -2.3921824468534978e+00 -2.3544853238035852e+00
 -2.3170666422887409e+00 -2.2799286010479589e+00 -2.2430734237997974e+00 -2.2065033483810113e+00 -2.1702206157647681e+00
 -2.1342274589584642e+00 -2.0985260917811206e+00 -2.0631186975203701e+00 -2.0280074174690377e+00 -1.9931943393413010e+00
 -1.9586814855684520e+00 -1.9244708014742360e+00 -1.8905641433297871e+00 -1.8569632662881481e+00 -1.8236698121983848e+00
 -1.7906852972992822e+00 -1.7580110997926361e+00 -1.7256484472961318e+00 -1.6935984041758068e+00 -1.6618618587581131e+00
 -1.6304395105217950e+00 -1.5993318606191964e+00 -1.5685392126887647e+00 -1.5380616785237626e+00 -1.5078991840578837e+00
 -1.4780514754296723e+00 -1.4485181251257433e+00 -1.4192985382028049e+00 -1.3903919585884816e+00 -1.3617974754609383e+00
 -1.3335140297073069e+00 -1.3055404204609138e+00 -1.2778753117173081e+00 -1.2505172390290913e+00 -1.2234646162795493e+00
 -1.1967157425350854e+00 -1.1702688089764535e+00 -1.1441219059087941e+00 -1.1182730298504713e+00 -1.0927200907007091e+00
 -1.0674609189860347e+00 -1.0424932731855143e+00 -1.0178148471348001e+00 -9.9342327750897086e-01 -9.6931615138417693e-01
 -9.4549101387808798e-01 -9.2194537586913961e-01 -8.9867672179458191e-01 -8.7568251752733073e-01 -8.5296021833161839e-01
 -8.3050727689744719e-01 -8.0832115145384342e-01 -7.8639931396091367e-01 -7.6473925838070089e-01 -7.4333850902684340e-01
 -7.2219462899303488e-01 -7.0130522866028411e-01 -6.8066797428297932e-01 -6.6028059665375061e-01 -6.4014089984713496e-01
 -6.2024677004204420e-01 -6.0059618442303053e-01 -5.8118722016035851e-01 -5.6201806346887262e-01 -5.4308701874567167e-01
 -5.2439251778657969e-01 -5.0593312908142363e-01 -4.8770756718810526e-01 -4.6971470218548234e-01 -4.5195356920504426e-01
 -4.3442337804139458e-01 -4.1712352284152904e-01 -4.0005359187292217e-01 -3.8321337737040889e-01 -3.6660288525828338e-01
 -3.5022234037718436e-01 -3.3407218116416521e-01 -3.1815305046821402e-01 -3.0246578613574904e-01 -2.8701141149013970e-01
 -2.7179112570525377e-01 -2.5680629407302930e-01 -2.4205843816507308e-01 -2.2754922588828400e-01 -2.1328046143450202e-01
 -1.9925407512418339e-01 -1.8547211314410061e-01 -1.7193672717906855e-01 -1.5865016393769601e-01 -1.4561475457216258e-01
 -1.3283290399202186e-01 -1.2030708007202918e-01 -1.0803980275399601e-01 -9.6033633042669111e-02 -8.4291161895635722e-02
 -7.2814999007254258e-02 -6.1607761486610693e-02 -5.0672062429500023e-02 -4.0010499384434114e-02 -2.9625642712674562e-02
 -1.9520023842291390e-02 -9.6961234162471037e-03 -1.5635933450673276e-04  9.0969253098268487e-03  1.8061474400352256e-02
  2.6735131073182535e-02  3.5115850098733664e-02  4.3201710369484621e-02  5.0990927493717544e-02  5.8481866495226249e-02
  6.5673054619002691e-02  7.2563194242896215e-02  7.9151175895248352e-02  8.5436091378501153e-02  9.1417246998780774e-02
  9.7094176901454471e-02  1.0246665651266258e-01  1.0753471608682529e-01  1.1229865436012290e-01  1.1675905230995116e-01
  1.2091678702035073e-01  1.2477304565341138e-01  1.2832933952665007e-01  1.3158751829636403e-01  1.3454978424695743e-01
  1.3721870668624372e-01  1.3959723644672092e-01  1.4168872049277115e-01  1.4349691607976442e-01  1.4502599651145173e-01
  1.4628054169992571e-01  1.4726552443794919e-01  1.4798629644027025e-01  1.4844857423897342e-01  1.4865842493286555e-01
  1.4862225179089764e-01  1.4834677970962185e-01  1.4783904052468377e-01  1.4710635817635065e-01  1.4615633372907436e-01
  1.4499683024509027e-01  1.4363595751205130e-01  1.4208205662469742e-01  1.4034368442056067e-01  1.3842959776970548e-01
  1.3634873771850445e-01  1.3411021348744956e-01  1.3172328632299868e-01  1.2919735320345774e-01  1.2654193039889802e-01
  1.2376663688510901e-01  1.2088117761158686e-01  1.1789532662355776e-01  1.1481891003803728e-01  1.1166178887392469e-01
  1.0843384173613309e-01  1.0514494735375450e-01  1.0180496697226074e-01  9.8423726599739664e-02  9.5010999107166538e-02
  9.1576486182711248e-02  8.8129800140080539e-02  8.4680445580895949e-02  8.1237800911106967e-02  7.7811099711439763e-02
  7.4409411961881111e-02  7.1041625120198057e-02  6.7716425054492699e-02  6.4442276829792478e-02  6.1227405348675983e-02
  5.8079775845933948e-02  5.5007074237266099e-02  5.2016687322012756e-02  4.9115682839922362e-02  4.6310789381954542e-02
  4.3608376155117701e-02  4.1014432601343305e-02  3.8534547870394509e-02  3.6173890146810869e-02  3.3937185830887902e-02
  3.1828698573692638e-02  2.9852208167084410e-02  2.8010990430688412e-02  2.6307809340814420e-02  2.4744926345910006e-02
  2.3324113368779383e-02  2.2046665985063878e-02  2.0913416736809579e-02  1.9924748581122274e-02  1.9080608473909522e-02
  1.8380521088710043e-02  1.7823602670610252e-02  1.7408575025248035e-02  1.7133779642903798e-02  1.6997191957678653e-02
  1.6996435741759911e-02  1.7128797634773717e-02  1.7391241808224978e-02  1.7780424765024460e-02  1.8292710274103147e-02
  1.8924184440113779e-02  1.9670670908219674e-02  2.0527746203970708e-02  2.1490755208266536e-02  2.2554826767407075e-02
  2.3714889438230160e-02  2.4965687368336428e-02  2.6301796311401466e-02  2.7717639777575128e-02  2.9207505318968083e-02
  3.0765560950225652e-02  3.2385871704188759e-02  3.4062416322642175e-02  3.5789104082150025e-02  3.7559791754978353e-02
  3.9368300705105087e-02  4.1208434119317176e-02  4.3073994373394875e-02  4.4958800533383352e-02  4.6856705991951374e-02
  4.8761616239837498e-02  5.0667506772383117e-02  5.2568441131152999e-02  5.4458589080642918e-02  5.6332244920074624e-02
  5.8183845930277846e-02  6.0007990955659736e-02  6.1799459121261377e-02  6.3553228684901569e-02  6.5264496024407773e-02
  6.6928694759934543e-02  6.8541515011368709e-02  7.0098922790822249e-02  7.1597179530212024e-02  7.3032861743927119e-02
  7.4402880821775624e-02  7.5704501396494581e-02  7.6935347598329012e-02  7.8093396076110891e-02  7.9176966886431596e-02
  8.0184714284472644e-02  8.1115617427939476e-02  8.1968970994098611e-02  8.2744375709917592e-02  8.3441728795308270e-02
  8.4061214319473151e-02  8.4603293470354848e-02  8.5068694737188533e-02  8.5458404006157826e-02  8.5773654569153354e-02
  8.6015917045634813e-02  8.6186889217595972e-02  8.6288485777632734e-02  8.6322827990114454e-02  8.6292233265458276e-02
  8.6199204647506661e-02  8.6046420214007935e-02  8.5836722390200001e-02  8.5573107175497182e-02  8.5258713283280163e-02
  8.4896811193789057e-02  8.4490792120119562e-02  8.4044156887322224e-02  8.3560504724604898e-02  8.3043521970638204e-02
  8.2496970691964197e-02  8.1924677214508093e-02  8.1330520568193149e-02  8.0718420844658620e-02  8.0092327468080843e-02
  7.9456207379097463e-02  7.8814033131834729e-02  7.8169770904038011e-02  7.7527368420305207e-02  7.6890742788423533e-02
  7.6263768248809233e-02  7.5650263837050549e-02  7.5053980959553596e-02  7.4478590882291640e-02  7.3927672132657246e-02
  7.3404697814417691e-02  7.2913022835773292e-02  7.2455871050519260e-02  7.2036322312310108e-02  7.1657299442027630e-02
  7.1321555108251833e-02  7.1031658620834895e-02  7.0789982637578408e-02  7.0598689784013624e-02  7.0459719197817114e-02
  7.0374774536619292e-02  7.0345320894020388e-02  7.0372589296199412e-02  7.0457582106781630e-02  7.0601078482108365e-02
  7.0803639875136284e-02  7.1065615587966535e-02  7.1387148373003598e-02  7.1768180082743757e-02  7.2208457368193465e-02
  7.2707537425917262e-02  7.3264793793715560e-02  7.3879422194932015e-02  7.4550446431390707e-02  7.5276724324963046e-02
  7.6056953707764358e-02  7.6889678460980201e-02  7.7773294602322449e-02  7.8706056422114992e-02  7.9686082668009334e-02
  8.0711362778329715e-02  8.1779763164048100e-02  8.2889033539388826e-02  8.4036813301062940e-02  8.5220637956132425e-02
  8.6437945598503860e-02  8.7686083434052112e-02  8.8962314354373517e-02  9.0263823559168968e-02  9.1587725227256458e-02
  9.2931069236213720e-02  9.4290847930650276e-02  9.5664002939109316e-02  9.7047432039599341e-02  9.8437996073755460e-02
  9.9832525909630487e-02  1.0122782945311565e-01  1.0262069870799106e-01  1.0400791688460609e-01  1.0538626555718908e-01
  1.0675253186978724e-01  1.0810351579083576e-01  1.0943603741635724e-01  1.1074694432179016e-01  1.1203311896244775e-01
  1.1329148612260605e-01  1.1451902041322197e-01  1.1571275381828104e-01  1.1686978328977478e-01  1.1798727839130795e-01
  1.1906248899033531e-01  1.2009275299902834e-01  1.2107550416377148e-01  1.2200827988947933e-01  1.2288872815517568e-01
  1.2371461030396325e-01  1.2448380110499170e-01  1.2519428858677628e-01  1.2584417386472402e-01  1.2643167096296737e-01
  1.2695510663050552e-01  1.2741292015165281e-01  1.2780366315079464e-01  1.2812599939145089e-01  1.2837870456964651e-01
  1.2856066610158981e-01  1.2867088290565801e-01  1.2870846517868997e-01  1.2867263416658681e-01  1.2856272192921953e-01
  1.2837817109964417e-01  1.2811853463762438e-01  1.2778347557746142e-01  1.2737276677013148e-01  1.2688629061973050e-01
  1.2632403881422630e-01  1.2568611205051816e-01  1.2497271975380395e-01  1.2418417979125422e-01  1.2332091817999431e-01
  1.2238346878939332e-01  1.2137247303766080e-01  1.2028867958275082e-01  1.1913294400757318e-01  1.1790622849951243e-01
  1.1660960152425397e-01  1.1524423749391767e-01  1.1381141642949892e-01  1.1231252361761708e-01  1.1074904926157121e-01
  1.0912258812670343e-01  1.0743483918006941e-01  1.0568760522441659e-01  1.0388279252646947e-01  1.0202241043952250e-01
  1.0010857102034036e-01  9.8143488640365595e-02  9.6129479591233663e-02  9.4068961684595429e-02  9.1964453846246963e-02
  8.9818575704566903e-02  8.7634047173261023e-02  8.5413688028414411e-02  8.3160417479850882e-02  8.0877253736799881e-02
  7.8567313567870736e-02  7.6233811855334427e-02  7.3880061102635272e-02  7.1509469261818073e-02  6.9125532000833642e-02
  6.6731822088727924e-02  6.4331978549568625e-02  6.1929695745872482e-02  5.9528712391537439e-02  5.7132800494279330e-02
  5.4745754227573447e-02  5.2371378732100654e-02  5.0013478846698350e-02  4.7675847768816115e-02  4.5362255644475956e-02
  4.3076438087737444e-02  4.0822084629667403e-02  3.8602827096814396e-02  3.6422227919187915e-02  3.4283768367742246e-02
  3.2190836721365058e-02  3.0146716363370785e-02  2.8154573807498532e-02  2.6217446653414897e-02  2.4338231471721386e-02
  2.2519671618466554e-02  2.0764344979162890e-02  1.9074651642308378e-02  1.7452801502412772e-02  1.5900801792528646e-02
  1.4420444546287036e-02  1.3013293989437916e-02  1.1680673860895288e-02  1.0423654663287043e-02  9.2430408430095330e-03
  8.1393578997867918e-03  7.1128394257345285e-03  6.1634140739288655e-03  5.2906924564796358e-03  4.4939539721085813e-03
  3.7721335632321172e-03  3.1238084025489218e-03  2.5471845091320773e-03  2.0400832940261127e-03  1.5999280353486980e-03
  1.2237302828968849e-03  9.0807619225827566e-04  6.4911278842688766e-04  4.4253415892350024e-04  2.8356757642101696e-04
  1.6695955087435985e-04  8.6961811155022338e-05  3.7317216190554406e-05  1.1245595608558608e-05  1.4295198854603872e-06
  0.0000000000000000e+00
