# Supplementary material
Source: publisher figshare collection journal article supplement (https://rs.figshare.com/ndownloader/files/37464464)
Supplement: Supplementary file 2 [file 37464464 › Ordered_Nanoporous_Metals_SI/ONMs_EAM_Potential_files/EAM_Ni.OrtizRoldan.eam]

#-> LAMMPS Potential File in DYNAMO 86 setfl Format <-#
# EAM_Ni_parameter
# Implemented
2 Ni1 Ni2
1001 0.32933723988531016236 1001 0.01200000000000000025 12.00000000000000000000
28 58.68999999999999772626 3.52000000000000001776 FCC
-0.00002535110127544187
-1.77929192599424235155
-2.66660910166418796408
-3.37237696506423301201
-3.98612604466264341951
-4.54355641944647636876
-5.06315367847236075249
-5.55590325556192610179
-6.02892565370504662781
-6.48712234869063308906
-6.93401994131370624785
-7.37224337712382205012
-7.80379961616765349675
-8.23025684103734178620
-8.65286256254803376464
-9.07262421699034504741
-9.49036579887132170086
-9.90676865764696401584
-10.32240152397367793924
-10.73774302580992845435
-11.15319885244902309296
-11.56911503047520994869
-11.98578832657463344447
-12.40347449454899120269
-12.82239488241154035109
-13.24274177640118566046
-13.66468276110876445273
-14.08836430525260041691
-14.51391473222796335563
-14.94144669758722621111
-15.37105926816790812950
-15.80283967699063296664
-16.23686481242989998464
-16.67320248820136185941
-17.11191253147009661006
-17.55304771918703110600
-17.99665458710981980062
-18.44277413149563216166
-18.89144241989453121278
-19.34269112462008166631
-19.79654799017402666550
-20.25303724403662286591
-20.71217995871349515369
-21.17399437168317888336
-21.63849616886296800544
-22.10569873636097071312
-22.57561338457632160726
-23.04824954812009352167
-23.52361496453568889820
-24.00171583438196165616
-24.48255696489187371867
-24.96614189912201808852
-25.45247303225609059041
-25.94155171650993096932
-26.43337835590130424634
-26.92795249198994511630
-27.42527288155699949357
-27.92533756707596737101
-28.42814394072568617844
-28.93368880260779718583
-29.44196841375500639515
-29.95297854444932283968
-30.46671451831161547830
-30.98317125257300475027
-31.50234329489345341813
-32.02422485705424293201
-32.54880984581609482120
-33.07609189120434223241
-33.60606437245569111383
-34.13872044183715104282
-34.67405304652643138752
-35.21205494872481267521
-35.75271874415618356124
-36.29603687909123266309
-36.84200166602288106787
-37.39060529810654998073
-37.94183986246841300272
-38.49569735247565205327
-39.05216967905353442347
-39.61124868112684538346
-40.17292613525624034310
-40.73719376453364304780
-41.30404324679538774490
-41.87346622220676550796
-42.44545430026664689649
-43.01999906627728620379
-43.59709208732005691900
-44.17672491777491217135
-44.75888910441790358163
-45.34357619112849135945
-45.93077772323577079305
-46.52048525153027469514
-47.11269033596602895386
-47.70738454907549908057
-48.30455947911838165965
-48.90420673298337561619
-49.50631793886074660804
-50.11088474870237519099
-50.71789884048391883198
-51.32735192028354020977
-51.93923572419006973178
-52.55354202005251806895
-53.17026260908214396750
-53.78938932731733757464
-54.41091404696088318360
-55.03482867759855423628
-55.66112516730700576773
-56.28979550365900763609
-56.92083171463269053447
-57.55422586943172547080
-58.18997007922232711508
-58.82805649779307088920
-59.46847732214233417380
-60.11122479299906729011
-60.75629119528073829315
-61.40366885849309142031
-62.05335015707581902689
-62.70532751069762866791
-63.35959338450437172696
-64.01614028932328892552
-64.67496078182666963130
-65.33604746465751134110
-65.99939298651968044851
-66.66499004223581437145
-67.33283137277405216992
-68.00290976524686925586
-68.67521805288347991336
-69.34974911497752714240
-70.02649587681241882819
-70.70545130956534762845
-71.38660843019192725478
-72.06996030129268149267
-72.75550003096280704540
-73.44322077262660286578
-74.13311572485729072923
-74.82517813118407445927
-75.51940127988675044435
-76.21577850377923368796
-76.91430317998283783254
-77.61496872969016180832
-78.31776861792025101749
-79.02269635326601360248
-79.72974548763440338917
-80.43890961598009425870
-81.15018237603314332773
-81.86355744802163769691
-82.57902855438915423747
-83.29658945950806980818
-84.01623396938933296951
-84.73795593138829929103
-85.46174923390823607861
-86.18760780610060123763
-86.91552561756373052049
-87.64549667803915156128
-88.37751503710659051194
-89.11157478387767127970
-89.84767004668862000472
-90.58579499279208846474
-91.32594382804886379290
-92.06811079661882502023
-92.81229018065218383526
-93.55847629998083903047
-94.30666351180988726810
-95.05684621040968806938
-95.80901882680871040066
-96.56317582848706138066
-97.31931171907085342809
-98.07742103802787880795
-98.83749836036430735930
-99.59953829632256372406
-100.36353549108086724573
-101.12948462445405084509
-101.89738041059604256588
-102.66721759770386768196
-103.43899096772355505891
-104.21269533605770618578
-104.98832555127496846126
-105.76587649482135589096
-106.54534308073354509361
-107.32672025535427451359
-108.11000299704963367731
-108.89518631592858355361
-109.68226525356436695802
-110.47123488271846269981
-111.26209030706627345353
-112.05482666092518684309
-112.84943910898516605812
-113.64592284604091787514
-114.44427309672698811482
-115.24448511525474714290
-116.04655418515150699932
-116.85047561900256596346
-117.65624475819474525906
-118.46385697266293846042
-119.27330766063820988165
-120.08459224839913304095
-120.89770619002433704736
-121.71264496714852043624
-122.52940408871960187298
-123.34797909075908250998
-124.16836553612412785697
-124.99055901427234971379
-125.81455514102830761658
-126.64034955835288087655
-127.46793793411450224085
-128.29731596186252318148
-129.12847936060356346388
-129.96142387457882705348
-130.79614527304488547088
-131.63263935005576854564
-132.47090192424775523250
-133.31092883862584130839
-134.15271596035299239702
-134.99625918054078965724
-135.84155441404280395545
-136.68859759924990271429
-137.53738469788720522047
-138.38791169481388010354
-139.24017459782430705673
-140.09416943745156913792
-140.94989226677304827717
-141.80733916121783977360
-142.66650621837607104681
-143.52738955781049412508
-144.38998532086981185785
-145.25428967050382311754
-146.12029879108069962967
-146.98800888820619547914
-147.85741618854422085860
-148.72851693964000219239
-149.60130740974449281566
-150.47578388764097212515
-151.35194268247315108056
-152.22978012357518196040
-153.10929256030360079421
-153.99047636187063403668
-154.87332791717960844835
-155.75784363466181048352
-156.64401994211516466748
-157.53185328654447516783
-158.42134013400345793343
-159.31247696943844971429
-160.20526029653325394975
-161.09968663755626039347
-161.99575253320881529362
-162.89345454247504108025
-163.79278924247347504206
-164.69375322831007224522
-165.59634311293257269426
-166.50055552698688643432
-167.40638711867424603952
-168.31383455361051915133
-169.22289451468651577670
-170.13356370192977351508
-171.04583883236784913606
-171.95971663989314492937
-172.87519387512884350144
-173.79226730529632050093
-174.71093371408414895996
-175.63118990151784259979
-176.55303268383161707789
-177.47645889334091862111
-178.40146537831651585293
-179.32804900285998428444
-180.25620664678012872173
-181.18593520547057096337
-182.11723158978935543928
-183.05009272593864011469
-183.98451555534654744406
-184.92049703454972586769
-185.85803413507701975504
-186.79712384333495833744
-187.73776316049332990588
-188.67994910237274552856
-189.62367869933302699792
-190.56894899616295901978
-191.51575705197032561955
-192.46409994007439081543
-193.41397474789812349627
-194.36537857686198549345
-195.31830854227933969014
-196.27276177325182970890
-197.22873541256674911892
-198.18622661659475170381
-199.14523255518889754967
-200.10575041158458020618
-201.06777738230039176415
-202.03131067704021006648
-202.99634751859571224486
-203.96288514275079251092
-204.93092079818535466984
-205.90045174638191838312
-206.87147526153162857554
-207.84398863044171434922
-208.81798915244394265756
-209.79347413930420884753
-210.77044091513181456321
-211.74888681629136044648
-212.72880919131398513855
-213.71020540080996852339
-214.69307281738278447847
-215.67740882554281256489
-216.66321082162266975502
-217.65047621369342323305
-218.63920242148071793054
-219.62938687628303568999
-220.62102702088918704248
-221.61412030949793461332
-222.60866420763761652779
-223.60465619208684984187
-224.60209375079529081631
-225.60097438280661208410
-226.60129559818028610607
-227.60305491791575605021
-228.60624987387640771885
-229.61087800871422359705
-230.61693687579585798630
-231.62442403912842792124
-232.63333707328672517178
-233.64367356334065561896
-234.65543110478398602936
-235.66860730346263608226
-236.68319977550450516901
-237.69920614724992447009
-238.71662405518236482749
-239.73545114585962778619
-240.75568507584665667309
-241.77732351164735291604
-242.80036412963869452142
-243.82480461600425769575
-244.85064266666893217916
-245.87787598723357973540
-246.90650229291128425757
-247.93651930846337450021
-248.96792476813624261922
-250.00071641559873114602
-251.03489200388003155240
-252.07044929530832177988
-253.10738606144963114275
-254.14570008304752946060
-255.18538914996321409490
-256.22645106111605173282
-257.26888362442491597903
-258.31268465674969547763
-259.35785198383325678151
-260.40438344024482830719
-261.45227686932236110806
-262.50153012311670863710
-263.55214106233563597925
-264.60410755628834067466
-265.65742748283071250626
-266.71209872831099119139
-267.76811918751570829045
-268.82548676361602701945
-269.88419936811504840080
-270.94425492079506057053
-272.00565134966558389351
-273.06838659091118870492
-274.13245858884090466745
-275.19786529583717538117
-276.26460467230515405390
-277.33267468662330657025
-278.40207331509304822248
-279.47279854189088155181
-280.54484835901837413985
-281.61822076625486488410
-282.69291377110869234457
-283.76892538877063998370
-284.84625364206578979065
-285.92489656140793385930
-287.00485218475216697698
-288.08611855754975294985
-289.16869373270225196393
-290.25257577051604584994
-291.33776273865811390351
-292.42425271211106974079
-293.51204377312933502253
-294.60113401119537002160
-295.69152152297624525090
-296.78320441228038362169
-297.87618079001600790434
-298.97044877414680286165
-300.06600648965195432538
-301.16285206848334610186
-302.26098364952440533671
-303.36039937854957315722
-304.46109740818320688049
-305.56307589785922118608
-306.66633301378158193984
-307.77086692888406105340
-308.87667582279135558565
-309.98375788177941103640
-311.09211129873750678598
-312.20173427312920466647
-313.31262501095392281059
-314.42478172471032848989
-315.53820263335757090317
-316.65288596227833295416
-317.76882994324262199370
-318.88603281437008263310
-320.00449282009390117310
-321.12420821112539215392
-322.24517724441739119356
-323.36739818312878469442
-324.49086929658989220115
-325.61558886026682557713
-326.74155515572681451886
-327.86876647060421419155
-328.99722109856594443045
-330.12691733927744053290
-331.25785349836968407544
-332.39002788740481264540
-333.52343882384371909211
-334.65808463101285497032
-335.79396363807165926119
-336.93107417997987340641
-338.06941459746610689763
-339.20898323699486809346
-340.34977845073592561675
-341.49179859653219182292
-342.63504203786862944980
-343.77950714384161301496
-344.92519228912766493522
-346.07209585395355588844
-347.22021622406566621066
-348.36955179069980204076
-349.52010095055157989918
-350.67186210574681126673
-351.82483366381211453700
-352.97901403764569749910
-354.13440164548831035063
-355.29099491089448292769
-356.44879226270450089942
-357.60779213501507456385
-358.76799296715228138055
-359.92939320364291688747
-361.09199129418720985996
-362.25578569363079850518
-363.42077486193829827243
-364.58695726416510751733
-365.75433137043120268572
-366.92289565589447875027
-368.09264860072369174304
-369.26358869007242446969
-370.43571441405288169335
-371.60902426771031059616
-372.78351675099611384212
-373.95919036874397534120
-375.13604363064251856485
-376.31407505121171652718
-377.49328314977685749909
-378.67366645044387496455
-379.85522348207473442017
-381.03795277826327492221
-382.22185287731002745204
-383.40692232219862489728
-384.59315966057187097249
-385.78056344470718386219
-386.96913223149391569677
-388.15886458240885303894
-389.34975906349387742011
-390.54181424533175004399
-391.73502870302382916634
-392.92940101616693482356
-394.12492976883055462167
-395.32161354953433374249
-396.51945095122613338390
-397.71844057125895233185
-398.91858101136932646114
-400.11987087765555770602
-401.32230878055565881368
-402.52589333482552547139
-403.73062315951807477177
-404.93649687796096259262
-406.14351311773640418323
-407.35167051065934629150
-408.56096769275734459370
-409.77140330424833791767
-410.98297598952183307119
-412.19568439711724749941
-413.40952717970355934085
-414.62450299405998066504
-415.84061050105475487726
-417.05784836562577311270
-418.27621525676107694380
-419.49570984747822421923
-420.71633081480570126587
-421.93807683976308453566
-423.16094660734154331294
-424.38493880648508138620
-425.61005213007115344226
-426.83628527489213411172
-428.06363694163582067631
-429.29210583486792529584
-430.52169066301223665505
-431.75239013833299850376
-432.98420297691637870230
-434.21712789865233617093
-435.45116362721682889969
-436.68630889005254402946
-437.92256241835349328539
-439.15992294704483356327
-440.39838921476655286824
-441.63795996385613307211
-442.87863394033030317587
-444.12040989386844103137
-445.36328657779506556835
-446.60726274906369326345
-447.85233716823796612516
-449.09850859947675871808
-450.34577581051701145043
-451.59413757265599542734
-452.84359266073647631856
-454.09413985312914974202
-455.34577793171621351576
-456.59850568187647468221
-457.85232189246789857862
-459.10722535581214742706
-460.36321486767872102064
-461.62028922726960900036
-462.87844723720240835974
-464.13768770349554415588
-465.39800943555337653379
-466.65941124614880664012
-467.92189195141077107110
-469.18545037080639303895
-470.45008532712745363824
-471.71579564647498727936
-472.98258015824387712200
-474.25043769510875790729
-475.51936709300900929520
-476.78936719113391973224
-478.06043683190796400595
-479.33257486097716082440
-480.60578012719378193651
-481.88005148260242549441
-483.15538778242591888556
-484.43178788505099419126
-485.70925065201458892261
-486.98777494798906673168
-488.26735964076931395539
-489.54800360125892666474
-490.82970570345503347198
-492.11246482443709737709
-493.39627984435151120124
-494.68114964639823938342
-495.96707311681893770583
-497.25404914488188978794
-498.54207662286972890797
-499.83115444606630717317
-501.12128151274350784661
-502.41245672414788714377
-503.70467898448850974091
-504.99794720092359057162
-506.29226028354747768390
-507.58761714537945408665
-508.88401670234918583446
-510.18145787328518281356
-511.47993957990286162385
-512.77946074679061894130
-514.08002030139982707624
-515.38161717403011152783
-516.68425029781906232529
-517.98791860872859160736
-519.29262104553504286741
-520.59835654981532115926
-521.90512406593506966601
-523.21292254103877894522
-524.52175092503546238731
-525.83160817058910652122
-527.14249323310582440172
-528.45440507072339642036
-529.76734264429796894547
-531.08130491739450462774
-532.39629085627530002967
-533.71229942988702532602
-535.02932960985094723583
-536.34738037045269720693
-537.66645068862840162183
-538.98653954395592791116
-540.30764591864351586992
-541.62976879751840897370
-542.95290716801571306860
-544.27706002016952879785
-545.60222634659942286817
-546.92840514250190153689
-548.25559540563938298874
-549.58379613632905602572
-550.91300633743321668589
-552.24322501434778587281
-553.57445117499355546897
-554.90668382980413753103
-556.23992199171698302962
-557.57416467616303634713
-558.90941090105536659394
-560.24565968678155059024
-561.58291005619116731395
-562.92116103458715770103
-564.26041164971604757739
-565.60066093175692003570
-566.94190791331334366987
-568.28415162940223126498
-569.62739111744474485022
-570.97162541725674600457
-572.31685357103856404137
-573.66307462336681055604
-575.01028762118323811592
-576.35849161378689586854
-577.70768565282355666568
-579.05786879227696317685
-580.40904008845961925545
-581.76119860000335393124
-583.11434338785022646334
-584.46847351524331770634
-585.82358804771820359747
-587.17968605309283702809
-588.53676660146004451235
-589.89482876517740805866
-591.25387161885873865685
-592.61389423936532239168
-593.97489570579728024313
-595.33687509948504157364
-596.69983150397956706001
-598.06376400504507273581
-599.42867169064993504435
-600.79455365095736851799
-602.16140897831871825474
-603.52923676726265966863
-604.89803611448894571367
-606.26780611885908456316
-607.63854588138758572313
-609.01025450523457038798
-610.38293109569690386706
-611.75657476020091962710
-613.13118460829264222411
-614.50675975163142084057
-615.88329930398072065145
-617.26080238120039211935
-618.63926810123962241050
-620.01869558412693095306
-621.39908395196459878207
-622.78043232891945990559
-624.16273984121448847873
-625.54600561712379658275
-626.93022878696103816765
-628.31540848307497526548
-629.70154383984038304334
-631.08863399364997803787
-632.47667808290850643971
-633.86567524802330808598
-635.25562463139829105785
-636.64652537742563254142
-638.03837663247861655691
-639.43117754490458537475
-640.82492726501686775009
-642.21962494508863983356
-643.61526973934360285057
-645.01186080395154931466
-646.40939729701892701996
-647.80787837858247257827
-649.20730321060227652197
-650.60767095695427997271
-652.00898078342390817852
-653.41123185769799874834
-654.81442334935900362325
-656.21855442987691731105
-657.62362427260336517065
-659.02963205276455482817
-660.43657694745297703776
-661.84445813562354032911
-663.25327479808368025260
-664.66302611748869821895
-666.07371127833437185473
-667.48532946694967904477
-668.89787987149179571134
-670.31136168193768298806
-671.72577409007885762549
-673.14111628951422972023
-674.55738747564282675739
-675.97458684565981457126
-677.39271359854717502458
-678.81176693506881747453
-680.23174605776409862301
-681.65265017094179711421
-683.07447848067238282965
-684.49723019478335572785
-685.92090452285219726036
-687.34550067620000390889
-688.77101786788603021705
-690.19745531270086758013
-691.62481222716007778217
-693.05308782949964552245
-694.48228133966733821580
-695.91239197931929538754
-697.34341897181252534210
-698.77536154219899344753
-700.20821891722027885407
-701.64199032530086697079
-703.07667499654303355783
-704.51227216272059195035
-705.94878105727298134298
-707.38620091529946876108
-708.82453097355369209254
-710.26377047043774837221
-711.70391864599559994531
-713.14497474190920911497
-714.58693800149148955825
-716.02980766968050829746
-717.47358299303482453979
-718.91826321972712321440
-720.36384759953944012523
-721.81033538385645442759
-723.25772582566139590199
-724.70601817952899637021
-726.15521170162151065597
-727.60530564968212274835
-729.05629928303017095459
-730.50819186255591830559
-731.96098265071441346663
-733.41467091152128432441
-734.86925591054603046359
-736.32473691490758938016
-737.78111319326967532106
-739.23838401583407176076
-740.69654865433653867512
-742.15560638204124188633
-743.61555647373552346835
-745.07639820572512689978
-746.53813085582851272193
-748.00075370337231106532
-749.46426602918529624731
-750.92866711559577197477
-752.39395624642293114448
-753.86013270697515054053
-755.32719578404271487670
-756.79514476589406513085
-758.26397894227113738452
-759.73369760438311004691
-761.20430004490299324971
-762.67578555796148975787
-764.14815343914335699083
-765.62140298548149530689
-767.09553349545285527711
-768.57054426897389021178
-770.04643460739441707119
-771.52320381349500166834
-773.00085119148013745871
-774.47937604697472124826
-775.95877768701973309362
-777.43905542006655196019
-778.92020855597309036966
-780.40223640599833743181
-781.88513828279928929987
-783.36891350042469639448
-784.85356137431176648533
-786.33908122128082140989
-787.82547235953143172082
-789.31273410863741446519
-790.80086578954251308460
-792.28986672455687312322
-793.77973623735078945174
-795.27047365295129566221
-796.76207829773898083658
-798.25454949944116833649
-799.74788658712941469275
-801.24208889121484844509
-802.73715574344305423438
-804.23308647689088957122
-805.72988042596125524142
-807.22753692638025313499
-808.72605531519025134912
-810.22543493074931575393
-811.72567511272404772171
-813.22677520208662826917
-814.72873454111095270491
-816.23155247336740103492
-817.73522834371988210478
-819.23976149832105875248
-820.74515128460893720330
-822.25139705130152378842
-823.75849814839398277400
-825.26645392715363414027
-826.77526374011790721852
-828.28492694108774685446
-829.79544288512477123732
-831.30681092854820235516
-832.81903042892906796624
-834.33210074508792786219
-835.84602123709055376821
-837.36079126624326818273
-838.87641019509032958013
-840.39287738740813438199
-841.91019220820362534141
-843.42835402370928932214
-844.94736220137940563291
-846.46721610988629436179
-847.98791511911679208424
-849.50945860016804545012
-851.03184592534387320484
-852.55507646815135558427
-854.07914960329753739643
-855.60406470668431211379
-857.12982115540626182337
-858.65641832774531394534
-860.18385560316892224364
-861.71213236232574672613
-863.24124798704042405006
-864.77120186031368120894
-866.30199336631449114066
-867.83362189037973166705
-869.36608681900861483882
-870.89938753986052688560
-872.43352344174991230830
-873.96849391464502332383
-875.50429834966280395747
-877.04093613906422888249
-878.57840667625464448065
-880.11670935577672025829
-881.65584357330726561486
-883.19580872565779827710
-884.73660421076533566520
-886.27822942769307701383
-887.82068377662551483809
-889.36396665886559276260
-890.90807747683015804796
-892.45301563404905209609
-893.99878053515908504778
-895.54537158590198941965
-897.09278819312169162004
-898.64102976475953710178
-900.19009570985213031236
-901.73998543852837883605
-903.29069836200483223365
-904.84223389258363567933
-906.39459144364866460819
-907.94777042966325097950
-909.50177026616506736900
-911.05659036976612696890
-912.61223015814562131709
-914.16868905004992029717
-915.72596646528882047278
-917.28406182473077024042
-918.84297455030161927425
-920.40270406498018473940
-921.96324979279665967624
-923.52461115882897502161
-925.08678758919745632738
-926.64977851106607431575
-928.21358335263516892155
-929.77820154314099454496
-931.34363251285344631469
-932.90987569306867044361
-934.47693051611179271276
-936.04479641532930145331
-937.61347282508927492017
-939.18295918077615169750
-940.75325491878891170927
-942.32435947653846142202
-943.89627229244365480554
-945.46899280592936065659
-947.04252045742225618596
-948.61685468834991752374
-950.19199494113672699314
-951.76794065919978038437
-953.34469128694945538882
-954.92224626978236301511
-956.50060505408248445747
-958.07976708721457725915
-959.65973181752588061499
-961.24049869433815729280
-962.82206716794860312802
-964.40443668962643641862
-965.98760671160880519892
-967.57157668709896825021
-969.15634607026390767714
-970.74191431623103198945
-972.32828088108522024413
-973.91544522186654830875
-975.50340679656790143781
-977.09216506413133629394
-978.68171948444569352432
-980.27206951834546089231
-981.86321462760565736971
-983.45515427494092364213
-985.04788792400177044328
-986.64141503937321431295
-988.23573508657011643663
-989.83084753203797845345
-991.42675184314668968000
-993.02344748818961761572
-994.62093393638156157976
-996.21921065785477367172
-997.81827712365827665053
-999.41813280575297540054
-1001.01877717701086112356
-1002.62020971121285128902
-1004.22242988304356003937
-1005.82543716809220768482
-1007.42923104284750479565
-1009.03381098469685639429
-1010.63917647192351978447
-1012.24532698370228445128
-1013.85226200010038155597
-1015.45998100207202696765
-1017.06848347145717070816
-1018.67776889098058745731
-1020.28783674424539640313
-1021.89868651573510760500
-1023.51031769080827871221
-1025.12272975569794652984
-1026.73592219750707954518
-1028.34989450420926004881
-1029.96464616464299979270
-1031.58017666851151261653
-1033.19648550638044071093
-1034.81357216967353451764
-1036.43143615067310747690
-1038.05007694251480643288
-1039.66949403918783900735
-1041.28968693553133562091
-1042.91065512723162100883
-1044.53239811082175947377
-1046.15491538367632529116
-1047.77820644401276695135
-1049.40227079088617756497
-1051.02710792418838536832
-1052.65271734464545261289
-1054.27909855381517445494
-1055.90625105408594208711
-1057.53417434867196789128
-1059.16286794161487705423
-1060.79233133777779585216
-1062.42256404284512427694
-1064.05356556332048967306
-1065.68533540652356350620
-1067.31787308058846974745
-1068.95117809446173851029
-1070.58524995789912281907
-1072.22008818146537123539
-1073.85569227652990775823
-1075.49206175526660445030
-1077.12919613064946133818
-1078.76709491645397065440
-1080.40575762725052300084
-1082.04518377840713583282
-1083.68537288608149538049
-1085.32632446722504937497
-1086.96803803957755008014
-1088.61051312166364368750
-1090.25374923279559880029
-1091.89774589306625784957
-1093.54250262335017396254
-1095.18801894529883611540
-1096.83429438134180600173
-1098.48132845468239793263
-1100.12912068929722408939
-1101.77767060993164704996
-1103.42697774210137140471
-1105.07704161208744153555
-1106.72786174693510474754
-1108.37943767445199227950
-1110.03176892320834667771
-1111.68485502252929109090
-1113.33869550249960411747
-1114.99328989395689859521
-1116.64863772849207634863
-1118.30473853844569021021
-1119.96159185690885351505
-1121.61919721771846525371
-1123.27755415545561845647
-1124.93666220544514544599
-1126.59652090375288935320
-1128.25712978718411250156
-1129.91848839328031317564
-1131.58059626031877087371
-1133.24345292731163681310
-1134.90705793400024958828
-1136.57141082085672678659
-1138.23651112908237337251
-1139.90235840060222471948
-1141.56895217806709297292
-1143.23629200484879220312
-1144.90437742504127527354
-1146.57320798345517687267
-1148.24278322561895038234
-1149.91310269777750363573
-1151.58416594688605982810
-1153.25597252061243125354
-1154.92852196733474556822
-1156.60181383613894467999
-1158.27584767681469202216
-1159.95062303985832841136
-1161.62613947646832457394
-1163.30239653854255266197
-1164.97939377867851362680
-1166.65713075017174560344
-1168.33560700701150381065
-1170.01482210388121529832
-1171.69477559615711470542
-1173.37546703990528840222
-1175.05689599187917337986
329.33723988531016857451
318.92822982979708967832
308.84820622711731630261
299.08677115416662672942
289.63385532388031151640
280.47970769838497062665
271.61488543043668641985
263.03024412276977272995
254.71692839530629726141
246.66636275049955884242
238.87024272738614172340
231.32052633522204132532
224.00942575786729094034
216.92939932036100003643
210.07314370940008529942
203.43358643969705212839
197.00387855844647333470
190.77738758037165212045
184.74769064606763890879
178.90856789658013781263
173.25399605738741115601
167.77814222516622066905
162.47535785093245408461
157.34017291335192112456
152.36729027620566512269
147.55158022419777807954
142.88807517145801284641
138.37196453729282552558
133.99858978389005415011
129.76343961086129752402
125.66214530166689655744
121.69047621712029183527
117.84433543132487898220
114.11975550554095093503
110.51289439562353322799
107.02003148880955052391
103.63756376576580464643
100.36200208393958632769
97.18996757837638256206
94.11818817629415434567
91.14349522181721852121
88.26282020738858591358
85.47319160848920205353
82.77173181839867766030
80.15565417983592055862
77.62226011041722983919
75.16893631896761007738
72.79315210981218342567
70.49245677226883799449
68.26447705264801868452
66.10691470615236653430
64.01754412615080980231
61.99421004838173843154
60.03482532771693769291
58.13736878519289064116
56.29988312308895359592
54.52047290590087413875
52.79730260512808115436
51.12859470585702581502
49.51262787318776048551
47.94773517661211315044
46.43230237051270137272
44.96476622900741659805
43.54361293342345362589
42.16737651073644599364
40.83463732136414137130
39.54402059475487618556
38.29419501126009350855
37.08387132882808145951
35.91180105310232306692
34.77677514955284721054
33.67762279631130439839
32.61321017642459452190
31.58243930827988421584
30.58424691299534359246
29.61760331760802955614
28.68151139292760021249
27.77500552495997609981
26.89715061884027846872
26.04704113424735112403
25.22380015130488217778
24.42657846600559068406
23.65455371422539343484
22.90692952342391208731
22.18293469115628369082
21.48182238954883516158
20.80286939491807629565
20.14537534173830835016
19.50866200018828067186
18.89207257653159999222
18.29497103560934689881
17.71674144474589951415
17.15678733839125413851
16.61453110284435297217
16.08941338042290425392
15.58089249246486041045
15.08844388056656526942
14.61155956548105194770
14.14974762311830858152
13.70253167710715480609
13.26945040739509984462
12.85005707437935029702
12.44391905807814779905
12.05061741186700530193
11.66974643031950087391
11.30091323070689490748
10.94373734772483430788
10.59785034102911005505
10.26289541517556713757
9.93852705157221905097
9.62441065206383150610
9.32022219378134941792
9.02564789490014440787
8.74038389096225820651
8.46413592142879878111
8.19661902613914428173
7.93755725136382839224
7.68668336514789629632
7.44373858165110213747
7.20847229420058610572
6.98064181678069051173
6.76001213369319842172
6.54635565712981914999
6.33945199240681755981
6.13908771061959868121
5.94505612848279163529
5.75715709512865991826
5.57519678564397569431
5.39898750113232583914
5.22834747509565112011
5.06310068593527873304
4.90307667537901981092
4.74811037264706925498
4.59804192417528234671
4.45271652872022105640
4.31198427767585368287
4.17570000043720135352
4.04372311465139411268
3.91591748120169613756
3.79215126377489708531
3.67229679286718679876
3.55623043408827976819
3.44383246062789227793
3.33498692975303079322
3.22958156320871658806
3.12750763139873955154
3.02865984122699849479
2.93293622748371474174
2.84023804766448728643
2.75046968011368697660
2.66353852538712976283
2.57935491073226641490
2.49783199758737284313
2.41888569200430669781
2.34243455790244237136
2.26839973306429554256
2.19670484778617680632
2.12727594609997971986
2.06004140948481628826
1.99493188298982215834
1.93188020369192159365
1.87082133141474238336
1.81169228163723783354
1.75443206052278211082
1.69898160200173564682
1.64528370684257785328
1.59328298364874743065
1.54292579172033628154
1.49416018572169373435
1.44693586209785873820
1.40120410718455445931
1.35691774695821165686
1.31403109837419251882
1.27249992224301111676
1.23228137759595024470
1.19333397749299030544
1.15561754622747137056
1.11909317788334461419
1.08372319620225576742
1.04947111571906925853
1.01630160412574155337
0.98418044582471586601
0.95307450663424853055
0.92295169960925549368
0.89378095194242246357
0.86553217291143702550
0.83817622283927795124
0.81168488303554275909
0.78603082668780877018
0.76118759067299923693
0.73712954825967769157
0.71383188267311126207
0.69127056149583465672
0.66942231187731049413
0.64826459652710488601
0.62777559046683173438
0.60793415851686294360
0.58871983349459822144
0.57011279510179657670
0.55209384947919448727
0.53464440940731816632
0.51774647513306892854
0.50138261580230103487
0.48553595147924100139
0.47019013573419948804
0.45532933878161452323
0.44093823115103353283
0.42700196787418820410
0.41350617317185167643
0.40043692562468252705
0.38778074381275745575
0.37552457240898001745
0.36365576871202015541
0.35216208960489281399
0.34103167892572283648
0.33025305523766812499
0.31981509998538648620
0.30970704602582788123
0.29991846652152176489
0.29043926418490245700
0.28125966086257764287
0.27237018744879576415
0.26376167411770751192
0.25542524086434603703
0.24735228834456809976
0.23953448900450741155
0.23196377849039007124
0.22463234732985040698
0.21753263287616705912
0.21065731150710839681
0.20399929107034137088
0.19755170356760956563
0.19130789807013501291
0.18526143385793544804
0.17940607377597941885
0.17373577780032675721
0.16824469680761619528
0.16292716654147593180
0.15777770176962971349
0.15279099062567361167
0.14796188912968641360
0.14328541588202098334
0.13875674692480338690
0.13437121076583896651
0.13012428355979277494
0.12601158444167298578
0.12202887100780414331
0.11817203493962832872
0.11443709776582010329
0.11082020675834408641
0.10731763095822090259
0.10392575732690313706
0.10064108701928996259
0.09746023177453730368
0.09437991042093915595
0.09139694549127588830
0.08850825994513730754
0.08571087399483987013
0.08300190203166378511
0.08037854964923908663
0.07783811076101056214
0.07537796480880772088
0.07299557405964061940
0.07068848098793288626
0.06845430574049174433
0.06629074368160013664
0.06419556301569817602
0.06216660248520235882
0.06020176914108706090
0.05829903618392898862
0.05645644087318744259
0.05467208250256365420
0.05294412043935085160
0.05127077222575249227
0.04965031174020999305
0.04808106741684352314
0.04656142052116898217
0.04508980348031262769
0.04366469826600066773
0.04228463482865593009
0.04094818958098684486
0.03965398392950333917
0.03840068285244599422
0.03718699352266088831
0.03601166397399982455
0.03487348180987025897
0.03377127295260253653
0.03270390043234478600
0.03167026321423568880
0.03066929506264577318
0.02969996344131515392
0.02876126844825370107
0.02785224178430449615
0.02697194575430688149
0.02611947229982872209
0.02529394206246992141
0.02449450347677125869
0.02372033189179257456
0.02297062872045440782
0.02224462061576532729
0.02154155867308551325
0.02086071765760345517
0.02020139525622900722
0.01956291135313104751
0.01894460732817242199
0.01834584537751854372
0.01776600785571875313
0.01720449663858187803
0.01666073250618857471
0.01613415454540429589
0.01562421957127625889
0.01513040156671778026
0.01465219113990190621
0.01418909499880456095
0.01374063544235530794
0.01330634986767075326
0.01288579029286228764
0.01247852289492591867
0.01208412756223755519
0.01170219746119208377
0.01133233861653921808
0.01097416950498319131
0.01062732066162719834
0.01029143429885643127
0.00996616393726673135
0.00965117404825804534
0.00934613970792407857
0.00905074626188107946
0.00876468900069000793
0.00848767284553732064
0.00821941204385005959
0.00795962987453135463
0.00770805836251220716
0.00746443800232514821
0.00722851749041457988
0.00700005346590771866
0.00677881025957874448
0.00656455965074706060
0.00635708063185920665
0.00615615918051110825
0.00596158803867609301
0.00577316649891029647
0.00559070019731551255
0.00541400091304544261
0.00524288637414885902
0.00507718006954926016
0.00491671106696700121
0.00476131383659629277
0.00461082808035492148
0.00446509856653083161
0.00432397496965467986
0.00418731171543358215
0.00405496783058565107
0.00392680679742084520
0.00380269641301777487
0.00368250865285148265
0.00356611953873127397
0.00345340901091261256
0.00334426080425092795
0.00323856232826981276
0.00313620455101963711
0.00303708188660708339
0.00294109208627925042
0.00284813613295028297
0.00275811813906148232
0.00267094524766972553
0.00258652753666199862
0.00250477792599740866
0.00242561208788078658
0.00234894835977546550
0.00227470766016524533
0.00220281340697888340
0.00213319143859277667
0.00206576993733048825
0.00200047935538008852
0.00193725234305300266
0.00187602367931024357
0.00181673020448449890
0.00175931075512851380
0.00170370610092274643
0.00164985888357702505
0.00159771355766334796
0.00154721633331866316
0.00149831512075862582
0.00145095947654500499
0.00140510055155140985
0.00136069104057354867
0.00131768513353215330
0.00127603846821816710
0.00123570808453143141
0.00119665238016576332
0.00115883106769457903
0.00112220513301293143
0.00108673679509296763
0.00105238946701140083
0.00101912771820870615
0.00098691723794118338
0.00095572479988811963
0.00092551822787761008
0.00089626636269560364
0.00086793902994402867
0.00084050700891474567
0.00081394200244730430
0.00078821660773934746
0.00076330428807960230
0.00073917934547425366
0.00071581689413850952
0.00069319283482596706
0.00067128382996934830
0.00065006727960690528
0.00062952129806972924
0.00060962469140584394
0.00059035693551786088
0.00057169815499159111
0.00055362910259381813
0.00053613113941804473
0.00051918621565777033
0.00050277685198742497
0.00048688612153180243
0.00047149763240533944
0.00045659551080327957
0.00044216438462723982
0.00042818936762831997
0.00041465604405137128
0.00040155045376460947
0.00038885907785920788
0.00037656882470404277
0.00036466701644117513
0.00035314137590816941
0.00034198001397374092
0.00033117141727366230
0.00032070443633430538
0.00031056827407153169
0.00030075247465310089
0.00029124691271308214
0.00028204178290716262
0.00027312758979806262
0.00026449513806063997
0.00025613552299656028
0.00024804012134877309
0.00024020058240629201
0.00023260881939012713
0.00022525700111146512
0.00021813754389350692
0.00021124310374861713
0.00020456656880272754
0.00019810105195916912
0.00019183988379437643
0.00018577660567812204
0.00017990496311120181
0.00017421889927367955
0.00016871254877705300
0.00016338023161388253
0.00015821644729865252
0.00015321586919381133
0.00014837333901514745
0.00014368386151082199
0.00013914259930858258
0.00013474486792582833
0.00013048613093739322
0.00012636199529605057
0.00012236820680092253
0.00011850064570910800
0.00011475532248601785
0.00011112837369001590
0.00010761605798713644
0.00010421475229175590
0.00010092094802924546
0.00009773124751674288
0.00009464236045831654
0.00009165110055090021
0.00008875438219750231
0.00008594921732429712
0.00008323271229831322
0.00008060206494254364
0.00007805456164539374
0.00007558757456149007
0.00007319855890095798
0.00007088505030437641
0.00006864466230069735
0.00006647508384551242
0.00006437407693712261
0.00006233947430795691
0.00006036917718895225
0.00005846115314459677
0.00005661343397639421
0.00005482411369259451
0.00005309134654209081
0.00005141334511045864
0.00004978837847617001
0.00004821477042508351
0.00004669089772136578
0.00004521518843306342
0.00004378612031059543
0.00004240221921649627
0.00004106205760478696
0.00003976425304840847
0.00003850746681319559
0.00003729040247692295
0.00003611180459199616
0.00003497045739041130
0.00003386518352964331
0.00003279484287817433
0.00003175833133940399
0.00003075457971273316
0.00002978255259064272
0.00002884124729063232
0.00002792969282091524
0.00002704694887880432
0.00002619210488075396
0.00002536427902305941
0.00002456261737224271
0.00002378629298418862
0.00002303450505112033
0.00002230647807553634
0.00002160146107025569
0.00002091872678374630
0.00002025757094993787
0.00001961731156174475
0.00001899728816755028
0.00001839686118992580
0.00001781541126588293
0.00001725233860797680
0.00001670706238560341
0.00001617902012585047
0.00001566766713328586
0.00001517247592808356
0.00001469293570190857
0.00001422855179099878
0.00001377884516590084
0.00001334335193733316
0.00001292162287766680
0.00001251322295753015
0.00001211773089705997
0.00001173473873133517
0.00001136385138954588
0.00001100468628746288
0.00001065687293278773
0.00001032005254297590
0.00000999387767513933
0.00000967801186764569
0.00000937212929304594
0.00000907591442197074
0.00000878906169765033
0.00000851127522072100
0.00000824226844399398
0.00000798176387687108
0.00000772949279910285
0.00000748519498359344
0.00000724861842796666
0.00000701951909461596
0.00000679766065897058
0.00000658281426571778
0.00000637475829273006
0.00000617327812245353
0.00000597816592052194
0.00000578922042136761
0.00000560624672060853
0.00000542905607399710
0.00000525746570272338
0.00000509129860487190
0.00000493038337283743
0.00000477455401651177
0.00000462364979205853
0.00000447751503609997
0.00000433599900514426
0.00000419895572008801
0.00000406624381563326
0.00000393772639446391
0.00000381327088603094
0.00000369274890980101
0.00000357603614282698
0.00000346301219150424
0.00000335356046738009
0.00000324756806688847
0.00000314492565488557
0.00000304552735186662
0.00000294927062474715
0.00000285605618109628
0.00000276578786671284
0.00000267837256643870
0.00000259372010810699
0.00000251174316952612
0.00000243235718840364
0.00000235548027511710
0.00000228103312824177
0.00000220893895274830
0.00000213912338078572
0.00000207151439496821
0.00000200604225408650
0.00000194263942116715
0.00000188124049380562
0.00000182178213670127
0.00000176420301632460
0.00000170844373764939
0.00000165444678288452
0.00000160215645214224
0.00000155151880598153
0.00000150248160976770
0.00000145499427979025
0.00000140900783108398
0.00000136447482689910
0.00000132134932976846
0.00000127958685412132
0.00000123914432039483
0.00000119998001059581
0.00000116205352526711
0.00000112532574181401
0.00000108975877414783
0.00000105531593360499
0.00000102196169110128
0.00000098966164048226
0.00000095838246303205
0.00000092809189310379
0.00000089875868483641
0.00000087035257992341
0.00000084284427640019
0.00000081620539841804
0.00000079040846697337
0.00000076542687156208
0.00000074123484272979
0.00000071780742548977
0.00000069512045358083
0.00000067315052453899
0.00000065187497555692
0.00000063127186010641
0.00000061131992529971
0.00000059199858996637
0.00000057328792342300
0.00000055516862491399
0.00000053762200370211
0.00000052062995978825
0.00000050417496524064
0.00000048824004611411
0.00000047280876494081
0.00000045786520377440
0.00000044339394777002
0.00000042938006928334
0.00000041580911247213
0.00000040266707838450
0.00000038994041051850
0.00000037761598083799
0.00000036568107623068
0.00000035412338539401
0.00000034293098613561
0.00000033209233307507
0.00000032159624573450
0.00000031143189700542
0.00000030158880198020
0.00000029205680713645
0.00000028282607986332
0.00000027388709831880
0.00000026523064160753
0.00000025684778026915
0.00000024872986706721
0.00000024086852806919
0.00000023325565400854
0.00000022588339191961
0.00000021874413703704
0.00000021183052495115
0.00000020513542401131
0.00000019865192796932
0.00000019237334885540
0.00000018629321007928
0.00000018040523974934
0.00000017470336420295
0.00000016918170174123
0.00000016383455656188
0.00000015865641288372
0.00000015364192925699
0.00000014878593305340
0.00000014408341513040
0.00000013952952466406
0.00000013511956414524
0.00000013084898453398
0.00000012671338056693
0.00000012270848621320
0.00000011883017027378
0.00000011507443212006
0.00000011143739756701
0.00000010791531487682
0.00000010450455088885
0.00000010120158727190
0.00000009800301689488
0.00000009490554031226
0.00000009190596236056
0.00000008900118886241
0.00000008618822343480
0.00000008346416439820
0.00000008082620178334
0.00000007827161443269
0.00000007579776719338
0.00000007340210819904
0.00000007108216623741
0.00000006883554820116
0.00000006665993661939
0.00000006455308726700
0.00000006251282684971
0.00000006053705076225
0.00000005862372091733
0.00000005677086364333
0.00000005497656764835
0.00000005323898204865
0.00000005155631445940
0.00000004992682914574
0.00000004834884523236
0.00000004682073496954
0.00000004534092205414
0.00000004390788000353
0.00000004252013058099
0.00000004117624227084
0.00000003987482880179
0.00000003861454771695
0.00000003739409898903
0.00000003621222367931
0.00000003506770263898
0.00000003395935525161
0.00000003288603821520
0.00000003184664436291
0.00000003084010152091
0.00000002986537140246
0.00000002892144853681
0.00000002800735923204
0.00000002712216057070
0.00000002626493943712
0.00000002543481157546
0.00000002463092067767
0.00000002385243750006
0.00000002309855900799
0.00000002236850754747
0.00000002166153004299
0.00000002097689722067
0.00000002031390285605
0.00000001967186304553
0.00000001905011550090
0.00000001844801886623
0.00000001786495205620
0.00000001730031361550
0.00000001675352109835
0.00000001622401046773
0.00000001571123551353
0.00000001521466728911
0.00000001473379356569
0.00000001426811830396
0.00000001381716114239
0.00000001338045690172
0.00000001295755510511
0.00000001254801951347
0.00000001215142767546
0.00000001176737049168
0.00000001139545179273
0.00000001103528793049
0.00000001068650738240
0.00000001034875036822
0.00000001002166847890
0.00000000970492431718
0.00000000939819114956
0.00000000910115256925
0.00000000881350216979
0.00000000853494322899
0.00000000826518840282
0.00000000800395942907
0.00000000775098684021
0.00000000750600968552
0.00000000726877526186
0.00000000703903885301
0.00000000681656347723
0.00000000660111964281
0.00000000639248511134
0.00000000619044466846
0.00000000599478990186
0.00000000580531898630
0.00000000562183647541
0.00000000544415310008
0.00000000527208557324
0.00000000510545640078
0.00000000494409369842
0.00000000478783101449
0.00000000463650715816
0.00000000448996603317
0.00000000434805647687
0.00000000421063210419
0.00000000407755115675
0.00000000394867635654
0.00000000382387476436
0.00000000370301764268
0.00000000358598032285
0.00000000347264207646
0.00000000336288599085
0.00000000325659884851
0.00000000315367101025
0.00000000305399630213
0.00000000295747190595
0.00000000286399825318
0.00000000277347892221
0.00000000268582053897
0.00000000260093268053
0.00000000251872778188
0.00000000243912104559
0.00000000236203035430
0.00000000228737618607
0.00000000221508153233
0.00000000214507181842
0.00000000207727482670
0.00000000201162062201
0.00000000194804147958
0.00000000188647181513
0.00000000182684811724
0.00000000176910888184
0.00000000171319454872
0.00000000165904744014
0.00000000160661170135
0.00000000155583324289
0.00000000150665968488
0.00000000145904030295
0.00000000141292597591
0.00000000136826913511
0.00000000132502371534
0.00000000128314510732
0.00000000124259011168
0.00000000120331689444
0.00000000116528494379
0.00000000112845502835
0.00000000109278915667
0.00000000105825053807
0.00000000102480354466
0.00000000099241367461
0.00000000096104751656
0.00000000093067271513
0.00000000090125793758
0.00000000087277284146
0.00000000084518804332
0.00000000081847508840
0.00000000079260642129
0.00000000076755535749
0.00000000074329605588
0.00000000071980349208
0.00000000069705343262
0.00000000067502240998
0.00000000065368769832
0.00000000063302729008
0.00000000061301987327
0.00000000059364480950
0.00000000057488211266
0.00000000055671242831
0.00000000053911701376
0.00000000052207771866
0.00000000050557696634
0.00000000048959773567
0.00000000047412354345
0.00000000045913842749
0.00000000044462693006
0.00000000043057408202
0.00000000041696538733
0.00000000040378680810
0.00000000039102475013
0.00000000037866604889
0.00000000036669795590
0.00000000035510812564
0.00000000034388460274
0.00000000033301580974
0.00000000032249053506
0.00000000031229792149
0.00000000030242745495
0.00000000029286895370
0.00000000028361255778
0.00000000027464871887
0.00000000026596819043
0.00000000025756201817
0.00000000024942153082
0.00000000024153833114
0.00000000023390428733
0.00000000022651152458
0.00000000021935241698
0.00000000021241957964
0.00000000020570586108
0.00000000019920433585
0.00000000019290829737
0.00000000018681125105
0.00000000018090690755
0.00000000017518917632
0.00000000016965215932
0.00000000016429014489
0.00000000015909760192
0.00000000015406917410
0.00000000014919967443
0.00000000014448407982
0.00000000013991752597
0.00000000013549530231
0.00000000013121284715
0.00000000012706574296
0.00000000012304971187
0.00000000011916061117
0.00000000011539442913
0.00000000011174728077
0.00000000010821540393
0.00000000010479515535
0.00000000010148300691
0.00000000009827554200
0.00000000009516945201
0.00000000009216153289
0.00000000008924868184
0.00000000008642789417
0.00000000008369626012
0.00000000008105096190
0.00000000007848927080
0.00000000007600854433
0.00000000007360622352
0.00000000007127983031
0.00000000006902696491
0.00000000006684530343
0.00000000006473259539
0.00000000006268666145
0.00000000006070539116
0.00000000005878674076
0.00000000005692873109
0.00000000005512944555
0.00000000005338702810
0.00000000005169968138
0.00000000005006566482
0.00000000004848329287
0.00000000004695093327
0.00000000004546700531
0.00000000004402997828
0.00000000004263836983
0.00000000004129074446
0.00000000003998571204
0.00000000003872192639
0.00000000003749808386
0.00000000003631292201
0.00000000003516521831
0.00000000003405378884
0.00000000003297748715
0.00000000003193520297
0.00000000003092586115
0.00000000002994842052
0.00000000002900187281
0.00000000002808524162
0.00000000002719758141
0.00000000002633797653
0.00000000002550554026
0.00000000002469941392
0.00000000002391876595
0.00000000002316279109
0.00000000002243070951
0.00000000002172176605
0.00000000002103522942
0.00000000002037039141
0.00000000001972656623
0.00000000001910308974
0.00000000001849931880
0.00000000001791463061
0.00000000001734842203
0.00000000001680010900
0.00000000001626912592
0.00000000001575492505
0.00000000001525697598
0.00000000001477476505
0.00000000001430779484
0.00000000001385558367
0.00000000001341766505
0.00000000001299358725
0.00000000001258291283
0.00000000001218521816
0.00000000001180009299
0.00000000001142714007
0.00000000001106597467
0.00000000001071622424
0.00000000001037752800
0.00000000001004953656
0.00000000000973191160
0.00000000000942432548
0.00000000000912646090
0.00000000000883801061
0.00000000000855867705
0.00000000000828817210
0.00000000000802621670
0.00000000000777254065
0.00000000000752688227
0.00000000000728898815
0.00000000000705861289
0.00000000000683551886
0.00000000000661947592
0.00000000000641026122
0.00000000000620765895
0.00000000000601146011
0.00000000000582146232
0.00000000000563746958
0.00000000000545929211
0.00000000000528674610
0.00000000000511965357
0.00000000000495784215
0.00000000000480114493
0.00000000000464940028
0.00000000000450245165
0.00000000000436014748
0.00000000000422234096
0.00000000000408888994
0.00000000000395965677
0.00000000000383450813
0.00000000000371331493
28 58.68999999999999772626 3.52000000000000001776 FCC
-0.00002535110127544187
-1.77929192599424235155
-2.66660910166418796408
-3.37237696506423301201
-3.98612604466264341951
-4.54355641944647636876
-5.06315367847236075249
-5.55590325556192610179
-6.02892565370504662781
-6.48712234869063308906
-6.93401994131370624785
-7.37224337712382205012
-7.80379961616765349675
-8.23025684103734178620
-8.65286256254803376464
-9.07262421699034504741
-9.49036579887132170086
-9.90676865764696401584
-10.32240152397367793924
-10.73774302580992845435
-11.15319885244902309296
-11.56911503047520994869
-11.98578832657463344447
-12.40347449454899120269
-12.82239488241154035109
-13.24274177640118566046
-13.66468276110876445273
-14.08836430525260041691
-14.51391473222796335563
-14.94144669758722621111
-15.37105926816790812950
-15.80283967699063296664
-16.23686481242989998464
-16.67320248820136185941
-17.11191253147009661006
-17.55304771918703110600
-17.99665458710981980062
-18.44277413149563216166
-18.89144241989453121278
-19.34269112462008166631
-19.79654799017402666550
-20.25303724403662286591
-20.71217995871349515369
-21.17399437168317888336
-21.63849616886296800544
-22.10569873636097071312
-22.57561338457632160726
-23.04824954812009352167
-23.52361496453568889820
-24.00171583438196165616
-24.48255696489187371867
-24.96614189912201808852
-25.45247303225609059041
-25.94155171650993096932
-26.43337835590130424634
-26.92795249198994511630
-27.42527288155699949357
-27.92533756707596737101
-28.42814394072568617844
-28.93368880260779718583
-29.44196841375500639515
-29.95297854444932283968
-30.46671451831161547830
-30.98317125257300475027
-31.50234329489345341813
-32.02422485705424293201
-32.54880984581609482120
-33.07609189120434223241
-33.60606437245569111383
-34.13872044183715104282
-34.67405304652643138752
-35.21205494872481267521
-35.75271874415618356124
-36.29603687909123266309
-36.84200166602288106787
-37.39060529810654998073
-37.94183986246841300272
-38.49569735247565205327
-39.05216967905353442347
-39.61124868112684538346
-40.17292613525624034310
-40.73719376453364304780
-41.30404324679538774490
-41.87346622220676550796
-42.44545430026664689649
-43.01999906627728620379
-43.59709208732005691900
-44.17672491777491217135
-44.75888910441790358163
-45.34357619112849135945
-45.93077772323577079305
-46.52048525153027469514
-47.11269033596602895386
-47.70738454907549908057
-48.30455947911838165965
-48.90420673298337561619
-49.50631793886074660804
-50.11088474870237519099
-50.71789884048391883198
-51.32735192028354020977
-51.93923572419006973178
-52.55354202005251806895
-53.17026260908214396750
-53.78938932731733757464
-54.41091404696088318360
-55.03482867759855423628
-55.66112516730700576773
-56.28979550365900763609
-56.92083171463269053447
-57.55422586943172547080
-58.18997007922232711508
-58.82805649779307088920
-59.46847732214233417380
-60.11122479299906729011
-60.75629119528073829315
-61.40366885849309142031
-62.05335015707581902689
-62.70532751069762866791
-63.35959338450437172696
-64.01614028932328892552
-64.67496078182666963130
-65.33604746465751134110
-65.99939298651968044851
-66.66499004223581437145
-67.33283137277405216992
-68.00290976524686925586
-68.67521805288347991336
-69.34974911497752714240
-70.02649587681241882819
-70.70545130956534762845
-71.38660843019192725478
-72.06996030129268149267
-72.75550003096280704540
-73.44322077262660286578
-74.13311572485729072923
-74.82517813118407445927
-75.51940127988675044435
-76.21577850377923368796
-76.91430317998283783254
-77.61496872969016180832
-78.31776861792025101749
-79.02269635326601360248
-79.72974548763440338917
-80.43890961598009425870
-81.15018237603314332773
-81.86355744802163769691
-82.57902855438915423747
-83.29658945950806980818
-84.01623396938933296951
-84.73795593138829929103
-85.46174923390823607861
-86.18760780610060123763
-86.91552561756373052049
-87.64549667803915156128
-88.37751503710659051194
-89.11157478387767127970
-89.84767004668862000472
-90.58579499279208846474
-91.32594382804886379290
-92.06811079661882502023
-92.81229018065218383526
-93.55847629998083903047
-94.30666351180988726810
-95.05684621040968806938
-95.80901882680871040066
-96.56317582848706138066
-97.31931171907085342809
-98.07742103802787880795
-98.83749836036430735930
-99.59953829632256372406
-100.36353549108086724573
-101.12948462445405084509
-101.89738041059604256588
-102.66721759770386768196
-103.43899096772355505891
-104.21269533605770618578
-104.98832555127496846126
-105.76587649482135589096
-106.54534308073354509361
-107.32672025535427451359
-108.11000299704963367731
-108.89518631592858355361
-109.68226525356436695802
-110.47123488271846269981
-111.26209030706627345353
-112.05482666092518684309
-112.84943910898516605812
-113.64592284604091787514
-114.44427309672698811482
-115.24448511525474714290
-116.04655418515150699932
-116.85047561900256596346
-117.65624475819474525906
-118.46385697266293846042
-119.27330766063820988165
-120.08459224839913304095
-120.89770619002433704736
-121.71264496714852043624
-122.52940408871960187298
-123.34797909075908250998
-124.16836553612412785697
-124.99055901427234971379
-125.81455514102830761658
-126.64034955835288087655
-127.46793793411450224085
-128.29731596186252318148
-129.12847936060356346388
-129.96142387457882705348
-130.79614527304488547088
-131.63263935005576854564
-132.47090192424775523250
-133.31092883862584130839
-134.15271596035299239702
-134.99625918054078965724
-135.84155441404280395545
-136.68859759924990271429
-137.53738469788720522047
-138.38791169481388010354
-139.24017459782430705673
-140.09416943745156913792
-140.94989226677304827717
-141.80733916121783977360
-142.66650621837607104681
-143.52738955781049412508
-144.38998532086981185785
-145.25428967050382311754
-146.12029879108069962967
-146.98800888820619547914
-147.85741618854422085860
-148.72851693964000219239
-149.60130740974449281566
-150.47578388764097212515
-151.35194268247315108056
-152.22978012357518196040
-153.10929256030360079421
-153.99047636187063403668
-154.87332791717960844835
-155.75784363466181048352
-156.64401994211516466748
-157.53185328654447516783
-158.42134013400345793343
-159.31247696943844971429
-160.20526029653325394975
-161.09968663755626039347
-161.99575253320881529362
-162.89345454247504108025
-163.79278924247347504206
-164.69375322831007224522
-165.59634311293257269426
-166.50055552698688643432
-167.40638711867424603952
-168.31383455361051915133
-169.22289451468651577670
-170.13356370192977351508
-171.04583883236784913606
-171.95971663989314492937
-172.87519387512884350144
-173.79226730529632050093
-174.71093371408414895996
-175.63118990151784259979
-176.55303268383161707789
-177.47645889334091862111
-178.40146537831651585293
-179.32804900285998428444
-180.25620664678012872173
-181.18593520547057096337
-182.11723158978935543928
-183.05009272593864011469
-183.98451555534654744406
-184.92049703454972586769
-185.85803413507701975504
-186.79712384333495833744
-187.73776316049332990588
-188.67994910237274552856
-189.62367869933302699792
-190.56894899616295901978
-191.51575705197032561955
-192.46409994007439081543
-193.41397474789812349627
-194.36537857686198549345
-195.31830854227933969014
-196.27276177325182970890
-197.22873541256674911892
-198.18622661659475170381
-199.14523255518889754967
-200.10575041158458020618
-201.06777738230039176415
-202.03131067704021006648
-202.99634751859571224486
-203.96288514275079251092
-204.93092079818535466984
-205.90045174638191838312
-206.87147526153162857554
-207.84398863044171434922
-208.81798915244394265756
-209.79347413930420884753
-210.77044091513181456321
-211.74888681629136044648
-212.72880919131398513855
-213.71020540080996852339
-214.69307281738278447847
-215.67740882554281256489
-216.66321082162266975502
-217.65047621369342323305
-218.63920242148071793054
-219.62938687628303568999
-220.62102702088918704248
-221.61412030949793461332
-222.60866420763761652779
-223.60465619208684984187
-224.60209375079529081631
-225.60097438280661208410
-226.60129559818028610607
-227.60305491791575605021
-228.60624987387640771885
-229.61087800871422359705
-230.61693687579585798630
-231.62442403912842792124
-232.63333707328672517178
-233.64367356334065561896
-234.65543110478398602936
-235.66860730346263608226
-236.68319977550450516901
-237.69920614724992447009
-238.71662405518236482749
-239.73545114585962778619
-240.75568507584665667309
-241.77732351164735291604
-242.80036412963869452142
-243.82480461600425769575
-244.85064266666893217916
-245.87787598723357973540
-246.90650229291128425757
-247.93651930846337450021
-248.96792476813624261922
-250.00071641559873114602
-251.03489200388003155240
-252.07044929530832177988
-253.10738606144963114275
-254.14570008304752946060
-255.18538914996321409490
-256.22645106111605173282
-257.26888362442491597903
-258.31268465674969547763
-259.35785198383325678151
-260.40438344024482830719
-261.45227686932236110806
-262.50153012311670863710
-263.55214106233563597925
-264.60410755628834067466
-265.65742748283071250626
-266.71209872831099119139
-267.76811918751570829045
-268.82548676361602701945
-269.88419936811504840080
-270.94425492079506057053
-272.00565134966558389351
-273.06838659091118870492
-274.13245858884090466745
-275.19786529583717538117
-276.26460467230515405390
-277.33267468662330657025
-278.40207331509304822248
-279.47279854189088155181
-280.54484835901837413985
-281.61822076625486488410
-282.69291377110869234457
-283.76892538877063998370
-284.84625364206578979065
-285.92489656140793385930
-287.00485218475216697698
-288.08611855754975294985
-289.16869373270225196393
-290.25257577051604584994
-291.33776273865811390351
-292.42425271211106974079
-293.51204377312933502253
-294.60113401119537002160
-295.69152152297624525090
-296.78320441228038362169
-297.87618079001600790434
-298.97044877414680286165
-300.06600648965195432538
-301.16285206848334610186
-302.26098364952440533671
-303.36039937854957315722
-304.46109740818320688049
-305.56307589785922118608
-306.66633301378158193984
-307.77086692888406105340
-308.87667582279135558565
-309.98375788177941103640
-311.09211129873750678598
-312.20173427312920466647
-313.31262501095392281059
-314.42478172471032848989
-315.53820263335757090317
-316.65288596227833295416
-317.76882994324262199370
-318.88603281437008263310
-320.00449282009390117310
-321.12420821112539215392
-322.24517724441739119356
-323.36739818312878469442
-324.49086929658989220115
-325.61558886026682557713
-326.74155515572681451886
-327.86876647060421419155
-328.99722109856594443045
-330.12691733927744053290
-331.25785349836968407544
-332.39002788740481264540
-333.52343882384371909211
-334.65808463101285497032
-335.79396363807165926119
-336.93107417997987340641
-338.06941459746610689763
-339.20898323699486809346
-340.34977845073592561675
-341.49179859653219182292
-342.63504203786862944980
-343.77950714384161301496
-344.92519228912766493522
-346.07209585395355588844
-347.22021622406566621066
-348.36955179069980204076
-349.52010095055157989918
-350.67186210574681126673
-351.82483366381211453700
-352.97901403764569749910
-354.13440164548831035063
-355.29099491089448292769
-356.44879226270450089942
-357.60779213501507456385
-358.76799296715228138055
-359.92939320364291688747
-361.09199129418720985996
-362.25578569363079850518
-363.42077486193829827243
-364.58695726416510751733
-365.75433137043120268572
-366.92289565589447875027
-368.09264860072369174304
-369.26358869007242446969
-370.43571441405288169335
-371.60902426771031059616
-372.78351675099611384212
-373.95919036874397534120
-375.13604363064251856485
-376.31407505121171652718
-377.49328314977685749909
-378.67366645044387496455
-379.85522348207473442017
-381.03795277826327492221
-382.22185287731002745204
-383.40692232219862489728
-384.59315966057187097249
-385.78056344470718386219
-386.96913223149391569677
-388.15886458240885303894
-389.34975906349387742011
-390.54181424533175004399
-391.73502870302382916634
-392.92940101616693482356
-394.12492976883055462167
-395.32161354953433374249
-396.51945095122613338390
-397.71844057125895233185
-398.91858101136932646114
-400.11987087765555770602
-401.32230878055565881368
-402.52589333482552547139
-403.73062315951807477177
-404.93649687796096259262
-406.14351311773640418323
-407.35167051065934629150
-408.56096769275734459370
-409.77140330424833791767
-410.98297598952183307119
-412.19568439711724749941
-413.40952717970355934085
-414.62450299405998066504
-415.84061050105475487726
-417.05784836562577311270
-418.27621525676107694380
-419.49570984747822421923
-420.71633081480570126587
-421.93807683976308453566
-423.16094660734154331294
-424.38493880648508138620
-425.61005213007115344226
-426.83628527489213411172
-428.06363694163582067631
-429.29210583486792529584
-430.52169066301223665505
-431.75239013833299850376
-432.98420297691637870230
-434.21712789865233617093
-435.45116362721682889969
-436.68630889005254402946
-437.92256241835349328539
-439.15992294704483356327
-440.39838921476655286824
-441.63795996385613307211
-442.87863394033030317587
-444.12040989386844103137
-445.36328657779506556835
-446.60726274906369326345
-447.85233716823796612516
-449.09850859947675871808
-450.34577581051701145043
-451.59413757265599542734
-452.84359266073647631856
-454.09413985312914974202
-455.34577793171621351576
-456.59850568187647468221
-457.85232189246789857862
-459.10722535581214742706
-460.36321486767872102064
-461.62028922726960900036
-462.87844723720240835974
-464.13768770349554415588
-465.39800943555337653379
-466.65941124614880664012
-467.92189195141077107110
-469.18545037080639303895
-470.45008532712745363824
-471.71579564647498727936
-472.98258015824387712200
-474.25043769510875790729
-475.51936709300900929520
-476.78936719113391973224
-478.06043683190796400595
-479.33257486097716082440
-480.60578012719378193651
-481.88005148260242549441
-483.15538778242591888556
-484.43178788505099419126
-485.70925065201458892261
-486.98777494798906673168
-488.26735964076931395539
-489.54800360125892666474
-490.82970570345503347198
-492.11246482443709737709
-493.39627984435151120124
-494.68114964639823938342
-495.96707311681893770583
-497.25404914488188978794
-498.54207662286972890797
-499.83115444606630717317
-501.12128151274350784661
-502.41245672414788714377
-503.70467898448850974091
-504.99794720092359057162
-506.29226028354747768390
-507.58761714537945408665
-508.88401670234918583446
-510.18145787328518281356
-511.47993957990286162385
-512.77946074679061894130
-514.08002030139982707624
-515.38161717403011152783
-516.68425029781906232529
-517.98791860872859160736
-519.29262104553504286741
-520.59835654981532115926
-521.90512406593506966601
-523.21292254103877894522
-524.52175092503546238731
-525.83160817058910652122
-527.14249323310582440172
-528.45440507072339642036
-529.76734264429796894547
-531.08130491739450462774
-532.39629085627530002967
-533.71229942988702532602
-535.02932960985094723583
-536.34738037045269720693
-537.66645068862840162183
-538.98653954395592791116
-540.30764591864351586992
-541.62976879751840897370
-542.95290716801571306860
-544.27706002016952879785
-545.60222634659942286817
-546.92840514250190153689
-548.25559540563938298874
-549.58379613632905602572
-550.91300633743321668589
-552.24322501434778587281
-553.57445117499355546897
-554.90668382980413753103
-556.23992199171698302962
-557.57416467616303634713
-558.90941090105536659394
-560.24565968678155059024
-561.58291005619116731395
-562.92116103458715770103
-564.26041164971604757739
-565.60066093175692003570
-566.94190791331334366987
-568.28415162940223126498
-569.62739111744474485022
-570.97162541725674600457
-572.31685357103856404137
-573.66307462336681055604
-575.01028762118323811592
-576.35849161378689586854
-577.70768565282355666568
-579.05786879227696317685
-580.40904008845961925545
-581.76119860000335393124
-583.11434338785022646334
-584.46847351524331770634
-585.82358804771820359747
-587.17968605309283702809
-588.53676660146004451235
-589.89482876517740805866
-591.25387161885873865685
-592.61389423936532239168
-593.97489570579728024313
-595.33687509948504157364
-596.69983150397956706001
-598.06376400504507273581
-599.42867169064993504435
-600.79455365095736851799
-602.16140897831871825474
-603.52923676726265966863
-604.89803611448894571367
-606.26780611885908456316
-607.63854588138758572313
-609.01025450523457038798
-610.38293109569690386706
-611.75657476020091962710
-613.13118460829264222411
-614.50675975163142084057
-615.88329930398072065145
-617.26080238120039211935
-618.63926810123962241050
-620.01869558412693095306
-621.39908395196459878207
-622.78043232891945990559
-624.16273984121448847873
-625.54600561712379658275
-626.93022878696103816765
-628.31540848307497526548
-629.70154383984038304334
-631.08863399364997803787
-632.47667808290850643971
-633.86567524802330808598
-635.25562463139829105785
-636.64652537742563254142
-638.03837663247861655691
-639.43117754490458537475
-640.82492726501686775009
-642.21962494508863983356
-643.61526973934360285057
-645.01186080395154931466
-646.40939729701892701996
-647.80787837858247257827
-649.20730321060227652197
-650.60767095695427997271
-652.00898078342390817852
-653.41123185769799874834
-654.81442334935900362325
-656.21855442987691731105
-657.62362427260336517065
-659.02963205276455482817
-660.43657694745297703776
-661.84445813562354032911
-663.25327479808368025260
-664.66302611748869821895
-666.07371127833437185473
-667.48532946694967904477
-668.89787987149179571134
-670.31136168193768298806
-671.72577409007885762549
-673.14111628951422972023
-674.55738747564282675739
-675.97458684565981457126
-677.39271359854717502458
-678.81176693506881747453
-680.23174605776409862301
-681.65265017094179711421
-683.07447848067238282965
-684.49723019478335572785
-685.92090452285219726036
-687.34550067620000390889
-688.77101786788603021705
-690.19745531270086758013
-691.62481222716007778217
-693.05308782949964552245
-694.48228133966733821580
-695.91239197931929538754
-697.34341897181252534210
-698.77536154219899344753
-700.20821891722027885407
-701.64199032530086697079
-703.07667499654303355783
-704.51227216272059195035
-705.94878105727298134298
-707.38620091529946876108
-708.82453097355369209254
-710.26377047043774837221
-711.70391864599559994531
-713.14497474190920911497
-714.58693800149148955825
-716.02980766968050829746
-717.47358299303482453979
-718.91826321972712321440
-720.36384759953944012523
-721.81033538385645442759
-723.25772582566139590199
-724.70601817952899637021
-726.15521170162151065597
-727.60530564968212274835
-729.05629928303017095459
-730.50819186255591830559
-731.96098265071441346663
-733.41467091152128432441
-734.86925591054603046359
-736.32473691490758938016
-737.78111319326967532106
-739.23838401583407176076
-740.69654865433653867512
-742.15560638204124188633
-743.61555647373552346835
-745.07639820572512689978
-746.53813085582851272193
-748.00075370337231106532
-749.46426602918529624731
-750.92866711559577197477
-752.39395624642293114448
-753.86013270697515054053
-755.32719578404271487670
-756.79514476589406513085
-758.26397894227113738452
-759.73369760438311004691
-761.20430004490299324971
-762.67578555796148975787
-764.14815343914335699083
-765.62140298548149530689
-767.09553349545285527711
-768.57054426897389021178
-770.04643460739441707119
-771.52320381349500166834
-773.00085119148013745871
-774.47937604697472124826
-775.95877768701973309362
-777.43905542006655196019
-778.92020855597309036966
-780.40223640599833743181
-781.88513828279928929987
-783.36891350042469639448
-784.85356137431176648533
-786.33908122128082140989
-787.82547235953143172082
-789.31273410863741446519
-790.80086578954251308460
-792.28986672455687312322
-793.77973623735078945174
-795.27047365295129566221
-796.76207829773898083658
-798.25454949944116833649
-799.74788658712941469275
-801.24208889121484844509
-802.73715574344305423438
-804.23308647689088957122
-805.72988042596125524142
-807.22753692638025313499
-808.72605531519025134912
-810.22543493074931575393
-811.72567511272404772171
-813.22677520208662826917
-814.72873454111095270491
-816.23155247336740103492
-817.73522834371988210478
-819.23976149832105875248
-820.74515128460893720330
-822.25139705130152378842
-823.75849814839398277400
-825.26645392715363414027
-826.77526374011790721852
-828.28492694108774685446
-829.79544288512477123732
-831.30681092854820235516
-832.81903042892906796624
-834.33210074508792786219
-835.84602123709055376821
-837.36079126624326818273
-838.87641019509032958013
-840.39287738740813438199
-841.91019220820362534141
-843.42835402370928932214
-844.94736220137940563291
-846.46721610988629436179
-847.98791511911679208424
-849.50945860016804545012
-851.03184592534387320484
-852.55507646815135558427
-854.07914960329753739643
-855.60406470668431211379
-857.12982115540626182337
-858.65641832774531394534
-860.18385560316892224364
-861.71213236232574672613
-863.24124798704042405006
-864.77120186031368120894
-866.30199336631449114066
-867.83362189037973166705
-869.36608681900861483882
-870.89938753986052688560
-872.43352344174991230830
-873.96849391464502332383
-875.50429834966280395747
-877.04093613906422888249
-878.57840667625464448065
-880.11670935577672025829
-881.65584357330726561486
-883.19580872565779827710
-884.73660421076533566520
-886.27822942769307701383
-887.82068377662551483809
-889.36396665886559276260
-890.90807747683015804796
-892.45301563404905209609
-893.99878053515908504778
-895.54537158590198941965
-897.09278819312169162004
-898.64102976475953710178
-900.19009570985213031236
-901.73998543852837883605
-903.29069836200483223365
-904.84223389258363567933
-906.39459144364866460819
-907.94777042966325097950
-909.50177026616506736900
-911.05659036976612696890
-912.61223015814562131709
-914.16868905004992029717
-915.72596646528882047278
-917.28406182473077024042
-918.84297455030161927425
-920.40270406498018473940
-921.96324979279665967624
-923.52461115882897502161
-925.08678758919745632738
-926.64977851106607431575
-928.21358335263516892155
-929.77820154314099454496
-931.34363251285344631469
-932.90987569306867044361
-934.47693051611179271276
-936.04479641532930145331
-937.61347282508927492017
-939.18295918077615169750
-940.75325491878891170927
-942.32435947653846142202
-943.89627229244365480554
-945.46899280592936065659
-947.04252045742225618596
-948.61685468834991752374
-950.19199494113672699314
-951.76794065919978038437
-953.34469128694945538882
-954.92224626978236301511
-956.50060505408248445747
-958.07976708721457725915
-959.65973181752588061499
-961.24049869433815729280
-962.82206716794860312802
-964.40443668962643641862
-965.98760671160880519892
-967.57157668709896825021
-969.15634607026390767714
-970.74191431623103198945
-972.32828088108522024413
-973.91544522186654830875
-975.50340679656790143781
-977.09216506413133629394
-978.68171948444569352432
-980.27206951834546089231
-981.86321462760565736971
-983.45515427494092364213
-985.04788792400177044328
-986.64141503937321431295
-988.23573508657011643663
-989.83084753203797845345
-991.42675184314668968000
-993.02344748818961761572
-994.62093393638156157976
-996.21921065785477367172
-997.81827712365827665053
-999.41813280575297540054
-1001.01877717701086112356
-1002.62020971121285128902
-1004.22242988304356003937
-1005.82543716809220768482
-1007.42923104284750479565
-1009.03381098469685639429
-1010.63917647192351978447
-1012.24532698370228445128
-1013.85226200010038155597
-1015.45998100207202696765
-1017.06848347145717070816
-1018.67776889098058745731
-1020.28783674424539640313
-1021.89868651573510760500
-1023.51031769080827871221
-1025.12272975569794652984
-1026.73592219750707954518
-1028.34989450420926004881
-1029.96464616464299979270
-1031.58017666851151261653
-1033.19648550638044071093
-1034.81357216967353451764
-1036.43143615067310747690
-1038.05007694251480643288
-1039.66949403918783900735
-1041.28968693553133562091
-1042.91065512723162100883
-1044.53239811082175947377
-1046.15491538367632529116
-1047.77820644401276695135
-1049.40227079088617756497
-1051.02710792418838536832
-1052.65271734464545261289
-1054.27909855381517445494
-1055.90625105408594208711
-1057.53417434867196789128
-1059.16286794161487705423
-1060.79233133777779585216
-1062.42256404284512427694
-1064.05356556332048967306
-1065.68533540652356350620
-1067.31787308058846974745
-1068.95117809446173851029
-1070.58524995789912281907
-1072.22008818146537123539
-1073.85569227652990775823
-1075.49206175526660445030
-1077.12919613064946133818
-1078.76709491645397065440
-1080.40575762725052300084
-1082.04518377840713583282
-1083.68537288608149538049
-1085.32632446722504937497
-1086.96803803957755008014
-1088.61051312166364368750
-1090.25374923279559880029
-1091.89774589306625784957
-1093.54250262335017396254
-1095.18801894529883611540
-1096.83429438134180600173
-1098.48132845468239793263
-1100.12912068929722408939
-1101.77767060993164704996
-1103.42697774210137140471
-1105.07704161208744153555
-1106.72786174693510474754
-1108.37943767445199227950
-1110.03176892320834667771
-1111.68485502252929109090
-1113.33869550249960411747
-1114.99328989395689859521
-1116.64863772849207634863
-1118.30473853844569021021
-1119.96159185690885351505
-1121.61919721771846525371
-1123.27755415545561845647
-1124.93666220544514544599
-1126.59652090375288935320
-1128.25712978718411250156
-1129.91848839328031317564
-1131.58059626031877087371
-1133.24345292731163681310
-1134.90705793400024958828
-1136.57141082085672678659
-1138.23651112908237337251
-1139.90235840060222471948
-1141.56895217806709297292
-1143.23629200484879220312
-1144.90437742504127527354
-1146.57320798345517687267
-1148.24278322561895038234
-1149.91310269777750363573
-1151.58416594688605982810
-1153.25597252061243125354
-1154.92852196733474556822
-1156.60181383613894467999
-1158.27584767681469202216
-1159.95062303985832841136
-1161.62613947646832457394
-1163.30239653854255266197
-1164.97939377867851362680
-1166.65713075017174560344
-1168.33560700701150381065
-1170.01482210388121529832
-1171.69477559615711470542
-1173.37546703990528840222
-1175.05689599187917337986
329.33723988531016857451
318.92822982979708967832
308.84820622711731630261
299.08677115416662672942
289.63385532388031151640
280.47970769838497062665
271.61488543043668641985
263.03024412276977272995
254.71692839530629726141
246.66636275049955884242
238.87024272738614172340
231.32052633522204132532
224.00942575786729094034
216.92939932036100003643
210.07314370940008529942
203.43358643969705212839
197.00387855844647333470
190.77738758037165212045
184.74769064606763890879
178.90856789658013781263
173.25399605738741115601
167.77814222516622066905
162.47535785093245408461
157.34017291335192112456
152.36729027620566512269
147.55158022419777807954
142.88807517145801284641
138.37196453729282552558
133.99858978389005415011
129.76343961086129752402
125.66214530166689655744
121.69047621712029183527
117.84433543132487898220
114.11975550554095093503
110.51289439562353322799
107.02003148880955052391
103.63756376576580464643
100.36200208393958632769
97.18996757837638256206
94.11818817629415434567
91.14349522181721852121
88.26282020738858591358
85.47319160848920205353
82.77173181839867766030
80.15565417983592055862
77.62226011041722983919
75.16893631896761007738
72.79315210981218342567
70.49245677226883799449
68.26447705264801868452
66.10691470615236653430
64.01754412615080980231
61.99421004838173843154
60.03482532771693769291
58.13736878519289064116
56.29988312308895359592
54.52047290590087413875
52.79730260512808115436
51.12859470585702581502
49.51262787318776048551
47.94773517661211315044
46.43230237051270137272
44.96476622900741659805
43.54361293342345362589
42.16737651073644599364
40.83463732136414137130
39.54402059475487618556
38.29419501126009350855
37.08387132882808145951
35.91180105310232306692
34.77677514955284721054
33.67762279631130439839
32.61321017642459452190
31.58243930827988421584
30.58424691299534359246
29.61760331760802955614
28.68151139292760021249
27.77500552495997609981
26.89715061884027846872
26.04704113424735112403
25.22380015130488217778
24.42657846600559068406
23.65455371422539343484
22.90692952342391208731
22.18293469115628369082
21.48182238954883516158
20.80286939491807629565
20.14537534173830835016
19.50866200018828067186
18.89207257653159999222
18.29497103560934689881
17.71674144474589951415
17.15678733839125413851
16.61453110284435297217
16.08941338042290425392
15.58089249246486041045
15.08844388056656526942
14.61155956548105194770
14.14974762311830858152
13.70253167710715480609
13.26945040739509984462
12.85005707437935029702
12.44391905807814779905
12.05061741186700530193
11.66974643031950087391
11.30091323070689490748
10.94373734772483430788
10.59785034102911005505
10.26289541517556713757
9.93852705157221905097
9.62441065206383150610
9.32022219378134941792
9.02564789490014440787
8.74038389096225820651
8.46413592142879878111
8.19661902613914428173
7.93755725136382839224
7.68668336514789629632
7.44373858165110213747
7.20847229420058610572
6.98064181678069051173
6.76001213369319842172
6.54635565712981914999
6.33945199240681755981
6.13908771061959868121
5.94505612848279163529
5.75715709512865991826
5.57519678564397569431
5.39898750113232583914
5.22834747509565112011
5.06310068593527873304
4.90307667537901981092
4.74811037264706925498
4.59804192417528234671
4.45271652872022105640
4.31198427767585368287
4.17570000043720135352
4.04372311465139411268
3.91591748120169613756
3.79215126377489708531
3.67229679286718679876
3.55623043408827976819
3.44383246062789227793
3.33498692975303079322
3.22958156320871658806
3.12750763139873955154
3.02865984122699849479
2.93293622748371474174
2.84023804766448728643
2.75046968011368697660
2.66353852538712976283
2.57935491073226641490
2.49783199758737284313
2.41888569200430669781
2.34243455790244237136
2.26839973306429554256
2.19670484778617680632
2.12727594609997971986
2.06004140948481628826
1.99493188298982215834
1.93188020369192159365
1.87082133141474238336
1.81169228163723783354
1.75443206052278211082
1.69898160200173564682
1.64528370684257785328
1.59328298364874743065
1.54292579172033628154
1.49416018572169373435
1.44693586209785873820
1.40120410718455445931
1.35691774695821165686
1.31403109837419251882
1.27249992224301111676
1.23228137759595024470
1.19333397749299030544
1.15561754622747137056
1.11909317788334461419
1.08372319620225576742
1.04947111571906925853
1.01630160412574155337
0.98418044582471586601
0.95307450663424853055
0.92295169960925549368
0.89378095194242246357
0.86553217291143702550
0.83817622283927795124
0.81168488303554275909
0.78603082668780877018
0.76118759067299923693
0.73712954825967769157
0.71383188267311126207
0.69127056149583465672
0.66942231187731049413
0.64826459652710488601
0.62777559046683173438
0.60793415851686294360
0.58871983349459822144
0.57011279510179657670
0.55209384947919448727
0.53464440940731816632
0.51774647513306892854
0.50138261580230103487
0.48553595147924100139
0.47019013573419948804
0.45532933878161452323
0.44093823115103353283
0.42700196787418820410
0.41350617317185167643
0.40043692562468252705
0.38778074381275745575
0.37552457240898001745
0.36365576871202015541
0.35216208960489281399
0.34103167892572283648
0.33025305523766812499
0.31981509998538648620
0.30970704602582788123
0.29991846652152176489
0.29043926418490245700
0.28125966086257764287
0.27237018744879576415
0.26376167411770751192
0.25542524086434603703
0.24735228834456809976
0.23953448900450741155
0.23196377849039007124
0.22463234732985040698
0.21753263287616705912
0.21065731150710839681
0.20399929107034137088
0.19755170356760956563
0.19130789807013501291
0.18526143385793544804
0.17940607377597941885
0.17373577780032675721
0.16824469680761619528
0.16292716654147593180
0.15777770176962971349
0.15279099062567361167
0.14796188912968641360
0.14328541588202098334
0.13875674692480338690
0.13437121076583896651
0.13012428355979277494
0.12601158444167298578
0.12202887100780414331
0.11817203493962832872
0.11443709776582010329
0.11082020675834408641
0.10731763095822090259
0.10392575732690313706
0.10064108701928996259
0.09746023177453730368
0.09437991042093915595
0.09139694549127588830
0.08850825994513730754
0.08571087399483987013
0.08300190203166378511
0.08037854964923908663
0.07783811076101056214
0.07537796480880772088
0.07299557405964061940
0.07068848098793288626
0.06845430574049174433
0.06629074368160013664
0.06419556301569817602
0.06216660248520235882
0.06020176914108706090
0.05829903618392898862
0.05645644087318744259
0.05467208250256365420
0.05294412043935085160
0.05127077222575249227
0.04965031174020999305
0.04808106741684352314
0.04656142052116898217
0.04508980348031262769
0.04366469826600066773
0.04228463482865593009
0.04094818958098684486
0.03965398392950333917
0.03840068285244599422
0.03718699352266088831
0.03601166397399982455
0.03487348180987025897
0.03377127295260253653
0.03270390043234478600
0.03167026321423568880
0.03066929506264577318
0.02969996344131515392
0.02876126844825370107
0.02785224178430449615
0.02697194575430688149
0.02611947229982872209
0.02529394206246992141
0.02449450347677125869
0.02372033189179257456
0.02297062872045440782
0.02224462061576532729
0.02154155867308551325
0.02086071765760345517
0.02020139525622900722
0.01956291135313104751
0.01894460732817242199
0.01834584537751854372
0.01776600785571875313
0.01720449663858187803
0.01666073250618857471
0.01613415454540429589
0.01562421957127625889
0.01513040156671778026
0.01465219113990190621
0.01418909499880456095
0.01374063544235530794
0.01330634986767075326
0.01288579029286228764
0.01247852289492591867
0.01208412756223755519
0.01170219746119208377
0.01133233861653921808
0.01097416950498319131
0.01062732066162719834
0.01029143429885643127
0.00996616393726673135
0.00965117404825804534
0.00934613970792407857
0.00905074626188107946
0.00876468900069000793
0.00848767284553732064
0.00821941204385005959
0.00795962987453135463
0.00770805836251220716
0.00746443800232514821
0.00722851749041457988
0.00700005346590771866
0.00677881025957874448
0.00656455965074706060
0.00635708063185920665
0.00615615918051110825
0.00596158803867609301
0.00577316649891029647
0.00559070019731551255
0.00541400091304544261
0.00524288637414885902
0.00507718006954926016
0.00491671106696700121
0.00476131383659629277
0.00461082808035492148
0.00446509856653083161
0.00432397496965467986
0.00418731171543358215
0.00405496783058565107
0.00392680679742084520
0.00380269641301777487
0.00368250865285148265
0.00356611953873127397
0.00345340901091261256
0.00334426080425092795
0.00323856232826981276
0.00313620455101963711
0.00303708188660708339
0.00294109208627925042
0.00284813613295028297
0.00275811813906148232
0.00267094524766972553
0.00258652753666199862
0.00250477792599740866
0.00242561208788078658
0.00234894835977546550
0.00227470766016524533
0.00220281340697888340
0.00213319143859277667
0.00206576993733048825
0.00200047935538008852
0.00193725234305300266
0.00187602367931024357
0.00181673020448449890
0.00175931075512851380
0.00170370610092274643
0.00164985888357702505
0.00159771355766334796
0.00154721633331866316
0.00149831512075862582
0.00145095947654500499
0.00140510055155140985
0.00136069104057354867
0.00131768513353215330
0.00127603846821816710
0.00123570808453143141
0.00119665238016576332
0.00115883106769457903
0.00112220513301293143
0.00108673679509296763
0.00105238946701140083
0.00101912771820870615
0.00098691723794118338
0.00095572479988811963
0.00092551822787761008
0.00089626636269560364
0.00086793902994402867
0.00084050700891474567
0.00081394200244730430
0.00078821660773934746
0.00076330428807960230
0.00073917934547425366
0.00071581689413850952
0.00069319283482596706
0.00067128382996934830
0.00065006727960690528
0.00062952129806972924
0.00060962469140584394
0.00059035693551786088
0.00057169815499159111
0.00055362910259381813
0.00053613113941804473
0.00051918621565777033
0.00050277685198742497
0.00048688612153180243
0.00047149763240533944
0.00045659551080327957
0.00044216438462723982
0.00042818936762831997
0.00041465604405137128
0.00040155045376460947
0.00038885907785920788
0.00037656882470404277
0.00036466701644117513
0.00035314137590816941
0.00034198001397374092
0.00033117141727366230
0.00032070443633430538
0.00031056827407153169
0.00030075247465310089
0.00029124691271308214
0.00028204178290716262
0.00027312758979806262
0.00026449513806063997
0.00025613552299656028
0.00024804012134877309
0.00024020058240629201
0.00023260881939012713
0.00022525700111146512
0.00021813754389350692
0.00021124310374861713
0.00020456656880272754
0.00019810105195916912
0.00019183988379437643
0.00018577660567812204
0.00017990496311120181
0.00017421889927367955
0.00016871254877705300
0.00016338023161388253
0.00015821644729865252
0.00015321586919381133
0.00014837333901514745
0.00014368386151082199
0.00013914259930858258
0.00013474486792582833
0.00013048613093739322
0.00012636199529605057
0.00012236820680092253
0.00011850064570910800
0.00011475532248601785
0.00011112837369001590
0.00010761605798713644
0.00010421475229175590
0.00010092094802924546
0.00009773124751674288
0.00009464236045831654
0.00009165110055090021
0.00008875438219750231
0.00008594921732429712
0.00008323271229831322
0.00008060206494254364
0.00007805456164539374
0.00007558757456149007
0.00007319855890095798
0.00007088505030437641
0.00006864466230069735
0.00006647508384551242
0.00006437407693712261
0.00006233947430795691
0.00006036917718895225
0.00005846115314459677
0.00005661343397639421
0.00005482411369259451
0.00005309134654209081
0.00005141334511045864
0.00004978837847617001
0.00004821477042508351
0.00004669089772136578
0.00004521518843306342
0.00004378612031059543
0.00004240221921649627
0.00004106205760478696
0.00003976425304840847
0.00003850746681319559
0.00003729040247692295
0.00003611180459199616
0.00003497045739041130
0.00003386518352964331
0.00003279484287817433
0.00003175833133940399
0.00003075457971273316
0.00002978255259064272
0.00002884124729063232
0.00002792969282091524
0.00002704694887880432
0.00002619210488075396
0.00002536427902305941
0.00002456261737224271
0.00002378629298418862
0.00002303450505112033
0.00002230647807553634
0.00002160146107025569
0.00002091872678374630
0.00002025757094993787
0.00001961731156174475
0.00001899728816755028
0.00001839686118992580
0.00001781541126588293
0.00001725233860797680
0.00001670706238560341
0.00001617902012585047
0.00001566766713328586
0.00001517247592808356
0.00001469293570190857
0.00001422855179099878
0.00001377884516590084
0.00001334335193733316
0.00001292162287766680
0.00001251322295753015
0.00001211773089705997
0.00001173473873133517
0.00001136385138954588
0.00001100468628746288
0.00001065687293278773
0.00001032005254297590
0.00000999387767513933
0.00000967801186764569
0.00000937212929304594
0.00000907591442197074
0.00000878906169765033
0.00000851127522072100
0.00000824226844399398
0.00000798176387687108
0.00000772949279910285
0.00000748519498359344
0.00000724861842796666
0.00000701951909461596
0.00000679766065897058
0.00000658281426571778
0.00000637475829273006
0.00000617327812245353
0.00000597816592052194
0.00000578922042136761
0.00000560624672060853
0.00000542905607399710
0.00000525746570272338
0.00000509129860487190
0.00000493038337283743
0.00000477455401651177
0.00000462364979205853
0.00000447751503609997
0.00000433599900514426
0.00000419895572008801
0.00000406624381563326
0.00000393772639446391
0.00000381327088603094
0.00000369274890980101
0.00000357603614282698
0.00000346301219150424
0.00000335356046738009
0.00000324756806688847
0.00000314492565488557
0.00000304552735186662
0.00000294927062474715
0.00000285605618109628
0.00000276578786671284
0.00000267837256643870
0.00000259372010810699
0.00000251174316952612
0.00000243235718840364
0.00000235548027511710
0.00000228103312824177
0.00000220893895274830
0.00000213912338078572
0.00000207151439496821
0.00000200604225408650
0.00000194263942116715
0.00000188124049380562
0.00000182178213670127
0.00000176420301632460
0.00000170844373764939
0.00000165444678288452
0.00000160215645214224
0.00000155151880598153
0.00000150248160976770
0.00000145499427979025
0.00000140900783108398
0.00000136447482689910
0.00000132134932976846
0.00000127958685412132
0.00000123914432039483
0.00000119998001059581
0.00000116205352526711
0.00000112532574181401
0.00000108975877414783
0.00000105531593360499
0.00000102196169110128
0.00000098966164048226
0.00000095838246303205
0.00000092809189310379
0.00000089875868483641
0.00000087035257992341
0.00000084284427640019
0.00000081620539841804
0.00000079040846697337
0.00000076542687156208
0.00000074123484272979
0.00000071780742548977
0.00000069512045358083
0.00000067315052453899
0.00000065187497555692
0.00000063127186010641
0.00000061131992529971
0.00000059199858996637
0.00000057328792342300
0.00000055516862491399
0.00000053762200370211
0.00000052062995978825
0.00000050417496524064
0.00000048824004611411
0.00000047280876494081
0.00000045786520377440
0.00000044339394777002
0.00000042938006928334
0.00000041580911247213
0.00000040266707838450
0.00000038994041051850
0.00000037761598083799
0.00000036568107623068
0.00000035412338539401
0.00000034293098613561
0.00000033209233307507
0.00000032159624573450
0.00000031143189700542
0.00000030158880198020
0.00000029205680713645
0.00000028282607986332
0.00000027388709831880
0.00000026523064160753
0.00000025684778026915
0.00000024872986706721
0.00000024086852806919
0.00000023325565400854
0.00000022588339191961
0.00000021874413703704
0.00000021183052495115
0.00000020513542401131
0.00000019865192796932
0.00000019237334885540
0.00000018629321007928
0.00000018040523974934
0.00000017470336420295
0.00000016918170174123
0.00000016383455656188
0.00000015865641288372
0.00000015364192925699
0.00000014878593305340
0.00000014408341513040
0.00000013952952466406
0.00000013511956414524
0.00000013084898453398
0.00000012671338056693
0.00000012270848621320
0.00000011883017027378
0.00000011507443212006
0.00000011143739756701
0.00000010791531487682
0.00000010450455088885
0.00000010120158727190
0.00000009800301689488
0.00000009490554031226
0.00000009190596236056
0.00000008900118886241
0.00000008618822343480
0.00000008346416439820
0.00000008082620178334
0.00000007827161443269
0.00000007579776719338
0.00000007340210819904
0.00000007108216623741
0.00000006883554820116
0.00000006665993661939
0.00000006455308726700
0.00000006251282684971
0.00000006053705076225
0.00000005862372091733
0.00000005677086364333
0.00000005497656764835
0.00000005323898204865
0.00000005155631445940
0.00000004992682914574
0.00000004834884523236
0.00000004682073496954
0.00000004534092205414
0.00000004390788000353
0.00000004252013058099
0.00000004117624227084
0.00000003987482880179
0.00000003861454771695
0.00000003739409898903
0.00000003621222367931
0.00000003506770263898
0.00000003395935525161
0.00000003288603821520
0.00000003184664436291
0.00000003084010152091
0.00000002986537140246
0.00000002892144853681
0.00000002800735923204
0.00000002712216057070
0.00000002626493943712
0.00000002543481157546
0.00000002463092067767
0.00000002385243750006
0.00000002309855900799
0.00000002236850754747
0.00000002166153004299
0.00000002097689722067
0.00000002031390285605
0.00000001967186304553
0.00000001905011550090
0.00000001844801886623
0.00000001786495205620
0.00000001730031361550
0.00000001675352109835
0.00000001622401046773
0.00000001571123551353
0.00000001521466728911
0.00000001473379356569
0.00000001426811830396
0.00000001381716114239
0.00000001338045690172
0.00000001295755510511
0.00000001254801951347
0.00000001215142767546
0.00000001176737049168
0.00000001139545179273
0.00000001103528793049
0.00000001068650738240
0.00000001034875036822
0.00000001002166847890
0.00000000970492431718
0.00000000939819114956
0.00000000910115256925
0.00000000881350216979
0.00000000853494322899
0.00000000826518840282
0.00000000800395942907
0.00000000775098684021
0.00000000750600968552
0.00000000726877526186
0.00000000703903885301
0.00000000681656347723
0.00000000660111964281
0.00000000639248511134
0.00000000619044466846
0.00000000599478990186
0.00000000580531898630
0.00000000562183647541
0.00000000544415310008
0.00000000527208557324
0.00000000510545640078
0.00000000494409369842
0.00000000478783101449
0.00000000463650715816
0.00000000448996603317
0.00000000434805647687
0.00000000421063210419
0.00000000407755115675
0.00000000394867635654
0.00000000382387476436
0.00000000370301764268
0.00000000358598032285
0.00000000347264207646
0.00000000336288599085
0.00000000325659884851
0.00000000315367101025
0.00000000305399630213
0.00000000295747190595
0.00000000286399825318
0.00000000277347892221
0.00000000268582053897
0.00000000260093268053
0.00000000251872778188
0.00000000243912104559
0.00000000236203035430
0.00000000228737618607
0.00000000221508153233
0.00000000214507181842
0.00000000207727482670
0.00000000201162062201
0.00000000194804147958
0.00000000188647181513
0.00000000182684811724
0.00000000176910888184
0.00000000171319454872
0.00000000165904744014
0.00000000160661170135
0.00000000155583324289
0.00000000150665968488
0.00000000145904030295
0.00000000141292597591
0.00000000136826913511
0.00000000132502371534
0.00000000128314510732
0.00000000124259011168
0.00000000120331689444
0.00000000116528494379
0.00000000112845502835
0.00000000109278915667
0.00000000105825053807
0.00000000102480354466
0.00000000099241367461
0.00000000096104751656
0.00000000093067271513
0.00000000090125793758
0.00000000087277284146
0.00000000084518804332
0.00000000081847508840
0.00000000079260642129
0.00000000076755535749
0.00000000074329605588
0.00000000071980349208
0.00000000069705343262
0.00000000067502240998
0.00000000065368769832
0.00000000063302729008
0.00000000061301987327
0.00000000059364480950
0.00000000057488211266
0.00000000055671242831
0.00000000053911701376
0.00000000052207771866
0.00000000050557696634
0.00000000048959773567
0.00000000047412354345
0.00000000045913842749
0.00000000044462693006
0.00000000043057408202
0.00000000041696538733
0.00000000040378680810
0.00000000039102475013
0.00000000037866604889
0.00000000036669795590
0.00000000035510812564
0.00000000034388460274
0.00000000033301580974
0.00000000032249053506
0.00000000031229792149
0.00000000030242745495
0.00000000029286895370
0.00000000028361255778
0.00000000027464871887
0.00000000026596819043
0.00000000025756201817
0.00000000024942153082
0.00000000024153833114
0.00000000023390428733
0.00000000022651152458
0.00000000021935241698
0.00000000021241957964
0.00000000020570586108
0.00000000019920433585
0.00000000019290829737
0.00000000018681125105
0.00000000018090690755
0.00000000017518917632
0.00000000016965215932
0.00000000016429014489
0.00000000015909760192
0.00000000015406917410
0.00000000014919967443
0.00000000014448407982
0.00000000013991752597
0.00000000013549530231
0.00000000013121284715
0.00000000012706574296
0.00000000012304971187
0.00000000011916061117
0.00000000011539442913
0.00000000011174728077
0.00000000010821540393
0.00000000010479515535
0.00000000010148300691
0.00000000009827554200
0.00000000009516945201
0.00000000009216153289
0.00000000008924868184
0.00000000008642789417
0.00000000008369626012
0.00000000008105096190
0.00000000007848927080
0.00000000007600854433
0.00000000007360622352
0.00000000007127983031
0.00000000006902696491
0.00000000006684530343
0.00000000006473259539
0.00000000006268666145
0.00000000006070539116
0.00000000005878674076
0.00000000005692873109
0.00000000005512944555
0.00000000005338702810
0.00000000005169968138
0.00000000005006566482
0.00000000004848329287
0.00000000004695093327
0.00000000004546700531
0.00000000004402997828
0.00000000004263836983
0.00000000004129074446
0.00000000003998571204
0.00000000003872192639
0.00000000003749808386
0.00000000003631292201
0.00000000003516521831
0.00000000003405378884
0.00000000003297748715
0.00000000003193520297
0.00000000003092586115
0.00000000002994842052
0.00000000002900187281
0.00000000002808524162
0.00000000002719758141
0.00000000002633797653
0.00000000002550554026
0.00000000002469941392
0.00000000002391876595
0.00000000002316279109
0.00000000002243070951
0.00000000002172176605
0.00000000002103522942
0.00000000002037039141
0.00000000001972656623
0.00000000001910308974
0.00000000001849931880
0.00000000001791463061
0.00000000001734842203
0.00000000001680010900
0.00000000001626912592
0.00000000001575492505
0.00000000001525697598
0.00000000001477476505
0.00000000001430779484
0.00000000001385558367
0.00000000001341766505
0.00000000001299358725
0.00000000001258291283
0.00000000001218521816
0.00000000001180009299
0.00000000001142714007
0.00000000001106597467
0.00000000001071622424
0.00000000001037752800
0.00000000001004953656
0.00000000000973191160
0.00000000000942432548
0.00000000000912646090
0.00000000000883801061
0.00000000000855867705
0.00000000000828817210
0.00000000000802621670
0.00000000000777254065
0.00000000000752688227
0.00000000000728898815
0.00000000000705861289
0.00000000000683551886
0.00000000000661947592
0.00000000000641026122
0.00000000000620765895
0.00000000000601146011
0.00000000000582146232
0.00000000000563746958
0.00000000000545929211
0.00000000000528674610
0.00000000000511965357
0.00000000000495784215
0.00000000000480114493
0.00000000000464940028
0.00000000000450245165
0.00000000000436014748
0.00000000000422234096
0.00000000000408888994
0.00000000000395965677
0.00000000000383450813
0.00000000000371331493
0.00000000000000000000
73.48812846812228372073
140.77331609144627577734
202.24824338782684662874
258.28349411768857635252
309.22872098998772116829
355.41375233165842928429
397.14964262736162936562
434.72966969615146126671
468.43028113812721358045
498.51199255693518352928
525.22023994283097181324
548.78618848561734466784
569.42749997687542418134
587.34906085624049865146
602.74367285679511496710
615.79270810972968774877
626.66673047802726159716
635.52608480284993675014
642.52145566434467127692
647.79439718053720298485
651.47783529367654864473
653.69654392264146736125
654.56759629265479816240
654.20079268942936323583
652.69906582380542658939
650.15886493482844343816
646.67051970388445170101
642.31858499983809451805
637.18216742499703286740
631.33523458400350136799
624.84690795233268545417
617.78174017786545846320
610.19997760784849560878
602.15780879441592787771
593.70759969458379146090
584.89811624517733434914
575.77473495941126202524
566.37964215974591297709
556.75202243109629307583
546.92823684941186002106
536.94199151299721961550
526.82449687764403734036
516.60461837161733456014
506.30901874274240981322
495.96229256719726663505
485.58709332807649161623
475.20425345131286576361
464.83289766706303680621
454.49055004613359187715
444.19323504340582076111
433.95557286346888758999
423.79086944773104050910
413.71120136713722104105
403.72749589021594829319
393.84960648248727466125
384.08638398024555726806
374.44574366935398757050
364.93472848792941931606
355.55956856061095550103
346.32573726147876413961
337.23800399259471305413
328.30048385553027401329
319.51668438413196327019
310.88954949810505468122
302.42150082876031547130
294.11447656044407494846
285.96996792374056894914
277.98905346947043426553
270.17243124580261337542
262.52044899442637415632
255.03313247567575672292
247.71021202675365202595
240.55114745174296331243
233.55515133691056917087
226.72121087988776366728
220.04810831663922954249
213.53444002569656845480
207.17863438492057071016
200.97896845206173566112
194.93358353659255044477
189.04049972668633472495
183.29762943180051593117
177.70278999807848663295
172.25371545071109835590
166.94806741447817444168
161.78344526092266164596
156.75739552798509635068
151.86742065543296575925
147.11098707706071309076
142.48553270839315132434
137.98847386650419366561
133.61721165654654441823
129.36913785768155094047
125.24164033928809658391
121.23210803661341117277
117.33793551340743022138
113.55652713753818261466
109.88530089412810752947
106.32169185937310373902
102.86315535688893874067
99.50716981719827458619
96.25123935979185318956
93.09289611608726033865
90.02970231055775229834
87.05925211630386684192
84.17917330040194201501
81.38712867346664836532
78.68081735702442358615
76.05797588149340526797
73.51637912680985209590
71.05384111702882421469
68.66821567954731619920
66.35739697896327982107
64.11931993497699977524
61.95196053317151552164
59.85333603697035442792
57.82150510855948510880
55.85456784608069824571
53.95066574394804348458
52.10798158271011004672
50.32473925447590090698
48.59920352953871969248
46.92967976947337405136
45.31451359163936132290
43.75209048970347680552
42.24083541449162026993
40.77921231919348343808
39.36572367267687155845
37.99890994441211944377
36.67734906427077845592
35.39965586023649990466
34.16448147685424885367
32.97051277704601801588
31.81647172973198678392
30.70111478552152206589
29.62323224257100307000
28.58164760455103703407
27.57521693251839778327
26.60282819235045437267
25.66340059927153660624
24.75588396087873732654
23.87925801996130203975
23.03253179830137753470
22.21474294254349146627
21.42495707312744812612
20.66226713719056817808
19.92579276626445405896
19.21467963951367963205
18.52809885319300420292
17.86524629693233023886
17.22534203739587610471
16.60762970980462682746
16.01137591775554724904
15.43586964172144071483
14.88042165656768744952
14.34436395837805022779
13.82704920084175448380
13.32785014141522772491
12.84615909743768646933
12.38138741234673290137
11.93296493210999820178
11.50033949196175875329
11.08297641350665330151
10.68035801223017244865
10.29198311543286692427
9.91736659058589431481
9.55603888408677093480
9.20754557037749599147
8.87144691137212504373
8.54731742612645817303
8.23474547067021944713
7.93333282791041494164
7.64269430750400502461
7.36245735558911462704
7.09226167425506837105
6.83175885062459009589
6.58061199541439112437
6.33849539083493329628
6.10509414768478109181
5.88010387149054913891
5.66323033753981341931
5.45418917465087815799
5.25270555752086387713
5.05851390749126128554
4.87135760156836905566
4.69098868953496062062
4.51716761898835006406
4.34966296813976871505
4.18825118620968428473
4.03271634125378319879
3.88284987525486569027
3.73845036631650007308
3.59932329779516280155
3.46528083420884414068
3.33614160376135027164
3.21173048732294175167
3.09187841370981120193
2.97642216110648272220
2.86520416447736936405
2.75807232881557728987
2.65487984807931365339
2.55548502966846280415
2.45975112429614828358
2.36754616111261428912
2.27874278794106244206
2.19321811648765407909
2.11085357239034587806
2.03153474997389071888
1.95515127158080592729
1.88159665135078535414
1.81076816332363543793
1.74256671374338867331
1.67689671744397328368
1.61366597819931678615
1.55278557292346053309
1.49416973960883647798
1.43773576889338916551
1.38340389914990713471
1.33109721499334821004
1.28074154910453286149
1.23226538727106849080
1.18559977654877246600
1.14067823644938792782
1.09743667306269543360
1.05581329602353157782
1.01574853823655630869
0.97718497827386319177
0.94006726536283991003
0.90434204688384101090
0.86995789829943948046
0.83686525543916268077
0.80501634906567454131
0.77436514165047320990
0.74486726628913291215
0.71647996768811472723
0.68916204515709178491
0.66287379754261988030
0.63757697004082880543
0.61323470282861147762
0.58981148145455797316
0.56727308893257721856
0.54558655948287115844
0.52472013386652416322
0.50464321626159558409
0.48532633263015917402
0.46674109052724221947
0.44886014030412851872
0.43165713765990276762
0.41510670749654282607
0.39918440903423713095
0.38386670214492174535
0.36913091486335919411
0.35495521203632279805
0.34131856507169133774
0.32820072275045669707
0.31558218306580121393
0.30344416605455004632
0.29176858758738749566
0.28053803408530231245
0.26973573813076906491
0.25934555494316935409
0.24935193968895433270
0.23973992559798365520
0.23049510285841071089
0.22160359826337872047
0.21305205558365461482
0.20482761664118692702
0.19691790305937723060
0.18931099866666073472
0.18199543253075198268
0.17496016260167210343
0.16819455994238444174
0.16168839352657679576
0.15543181558380794738
0.14941534747288953699
0.14362986606502498033
0.13806659061883547190
0.13271707013000927367
0.12757317113889060645
0.12262706597988570767
0.11787122145711115273
0.11329838793123514495
0.10890158880297472199
0.10467411037920718031
0.10060949210812890342
0.09670151717036500061
0.09294420341337464309
0.08933179461693604995
0.08585875207791035524
0.08251974650289518876
0.07930965019776664571
0.07622352954349109755
0.07325663774795575234
0.07040440786391979899
0.06766244606353624680
0.06502652516022219831
0.06249257836897915974
0.06005669329657559868
0.05771510615330190108
0.05546419617830181809
0.05330048027076113998
0.05122060781950773384
0.04922135572383842805
0.04729962359863998378
0.04545242915711848047
0.04367690376468515850
0.04197028815777588406
0.04032992832160259278
0.03875327152104580952
0.03723786247910573083
0.03578133969752564369
0.03438143191439400198
0.03303595469371740229
0.03174280714213334464
0.03049996874810737349
0.02930549633912277185
0.02815752115253372309
0.02705424601590794217
0.02599394263283325707
0.02497494897030985705
0.02399566674398664889
0.02305455899763782582
0.02215014777340257660
0.02128101186943974141
0.02044578468176765779
0.01964315212717763701
0.01887185064422190056
0.01813066526938520925
0.01741842778565512798
0.01673401494080624385
0.01607634673281170545
0.01544438475988977981
0.01483713063278314405
0.01425362444695754335
0.01369294331248957497
0.01315419993949582499
0.01263654127703336960
0.01213914720347838462
0.01166122926646127704
0.01120202947050907144
0.01076081911061130443
0.01033689764999398165
0.00992959164044614900
0.00953825368360755599
0.00916226143168235793
0.00880101662610095758
0.00845394417270740189
0.00812049125210086674
0.00780012646381194295
0.00749233900304161794
0.00719663786873969528
0.00691255110184265786
0.00663962505253698401
0.00637742367545367748
0.00612552785174244954
0.00588353473701132886
0.00565105713415654538
0.00542772289014268119
0.00521317431582911991
0.00500706762797134552
0.00480907241255940435
0.00461887110868568554
0.00443615851216579236
0.00426064129816385462
0.00409203756210283539
0.00393007637816628237
0.00377449737472473207
0.00362505032604427306
0.00348149475965948627
0.00334359957881546436
0.00321114269940659747
0.00308391070086070631
0.00296169849043842253
0.00284430898043688861
0.00273155277780693425
0.00262324788571048672
0.00251921941656355714
0.00241929931612658517
0.00232332609822109371
0.00223114458966684444
0.00214260568504960917
0.00205756611094380345
0.00197588819922902333
0.00189743966915249221
0.00182209341780333284
0.00174972731867650204
0.00168022402801696951
0.00161347079864613998
0.00154935930098384043
0.00148778545099026026
0.00142864924476235398
0.00137185459952968917
0.00131730920080394575
0.00126492435544611911
0.00121461485042396013
0.00116629881704122989
0.00111989760042834302
0.00107533563409226152
0.00103254031933092756
0.00099144190932520153
0.00095197339772814952
0.00091407041157865571
0.00087767110837263097
0.00084271607713179702
0.00080914824331580510
0.00077691277742960305
0.00074595700718342584
0.00071623033306840358
0.00068768414721586454
0.00066027175541360985
0.00063394830215715168
0.00060867069861868131
0.00058439755342095962
0.00056108910610770419
0.00053870716320612085
0.00051721503678134415
0.00049657748538626915
0.00047676065731409401
0.00045773203606432273
0.00043946038793652836
0.00042191571166936594
0.00040506919004557344
0.00038889314338669701
0.00037336098486425985
0.00035844717755684772
0.00034412719318538328
0.00033037747246138579
0.00031717538698559721
0.00030449920263672501
0.00029232804439238626
0.00028064186252658253
0.00026942140013016771
0.00025864816190286025
0.00024830438416729869
0.00023837300605760638
0.00022883764183670820
0.00021968255429847053
0.00021089262921237655
0.00020245335077013999
0.00019435077799518337
0.00018657152207745385
0.00017910272459748213
0.00017193203660500594
0.00016504759851879676
0.00015843802081565752
0.00015209236547776152
0.00014600012816873756
0.00014015122111001664
0.00013453595663009705
0.00012914503136041456
0.00012396951105254984
0.00011900081599247053
0.00011423070698846550
0.00010965127191031467
0.00010525491275813704
0.00010103433324017098
0.00009698252683957410
0.00009309276535107925
0.00008935858786911394
0.00008577379020968467
0.00008233241474903310
0.00007902874066272290
0.00007585727454946165
0.00007281274142456166
0.00006989007606854862
0.00006708441471697410
0.00006439108707804967
0.00006180560866522591
0.00005932367343235764
0.00005694114669956594
0.00005465405835838050
0.00005245859634519064
0.00005035110037245584
0.00004832805590754934
0.00004638608838949298
0.00004452195767423328
0.00004273255269946397
0.00004101488636036229
0.00003936609058793519
0.00003778341162200317
0.00003626420547115764
0.00003480593355233138
0.00003340615850290487
0.00003206254015855531
0.00003077283169031418
0.00002953487589456251
0.00002834660162993181
0.00002720602039532207
0.00002611122304346932
0.00002506037662471806
0.00002405172135586082
0.00002308356770911165
0.00002215429361646970
0.00002126234178492110
0.00002040621711810022
0.00001958448424020880
0.00001879576511815191
0.00001803873677801274
0.00001731212911213704
0.00001661472277324746
0.00001594534715214699
0.00001530287843570791
0.00001468623774197000
0.00001409438932930023
0.00001352633887668258
0.00001298113183232536
0.00001245785182788115
0.00001195561915568395
0.00001147358930650776
0.00001101095156545116
0.00001056692766364559
0.00001014077048357703
0.00000973176281589625
0.00000933921616567857
0.00000896246960617306
0.00000860088867815876
0.00000825386433310067
0.00000792081191836819
0.00000760117020284849
0.00000729440044135233
0.00000699998547627398
0.00000671742887502643
0.00000644625410183305
0.00000618600372251144
0.00000593623864094049
0.00000569653736595198
0.00000546649530743960
0.00000524572410052400
0.00000503385095666030
0.00000483051804061701
0.00000463538187229910
0.00000444811275242707
0.00000426839421112469
0.00000409592247850392
0.00000393040597637308
0.00000377156483022778
0.00000361913040071842
0.00000347284483381889
0.00000333246062895320
0.00000319774022436488
0.00000306845559904331
0.00000294438789054781
0.00000282532702809672
0.00000271107138031363
0.00000260142741704722
0.00000249620938470400
0.00000239523899455611
0.00000229834512350666
0.00000220536352681700
0.00000211613656231854
0.00000203051292565197
0.00000194834739609388
0.00000186950059254903
0.00000179383873930272
0.00000172123344114415
0.00000165156146748697
0.00000158470454512822
0.00000152054915930090
0.00000145898636268933
0.00000139991159208960
0.00000134322449240977
0.00000128882874771716
0.00000123663191905103
0.00000118654528873088
0.00000113848371090066
0.00000109236546806010
0.00000104811213334380
0.00000100564843831866
0.00000096490214607897
0.00000092580392942762
0.00000088828725394010
0.00000085228826571610
0.00000081774568363138
0.00000078460069590998
0.00000075279686084390
0.00000072228001149462
0.00000069299816421697
0.00000066490143085257
0.00000063794193444604
0.00000061207372834300
0.00000058725271853451
0.00000056343658911807
0.00000054058473075045
0.00000051865817197250
0.00000049761951329104
0.00000047743286390741
0.00000045806378098668
0.00000043947921136577
0.00000042164743560278
0.00000040453801427383
0.00000038812173642712
0.00000037237057010815
0.00000035725761487271
0.00000034275705620824
0.00000032884412178695
0.00000031549503947728
0.00000030268699704324
0.00000029039810346391
0.00000027860735180811
0.00000026729458360194
0.00000025644045462927
0.00000024602640210764
0.00000023603461318448
0.00000022644799470064
0.00000021725014417029
0.00000020842532192857
0.00000019995842439988
0.00000019183495844196
0.00000018404101672261
0.00000017656325408745
0.00000016938886487906
0.00000016250556116914
0.00000015590155186724
0.00000014956552267056
0.00000014348661682136
0.00000013765441663917
0.00000013205892579705
0.00000012669055231164
0.00000012154009221860
0.00000011659871390567
0.00000011185794307711
0.00000010730964832395
0.00000010294602727582
0.00000009875959331098
0.00000009474316280195
0.00000009088984287540
0.00000008719301966548
0.00000008364634704076
0.00000008024373578581
0.00000007697934321897
0.00000007384756322890
0.00000007084301671303
0.00000006796054240166
0.00000006519518805224
0.00000006254220199897
0.00000005999702504331
0.00000005755528267177
0.00000005521277758776
0.00000005296548254482
0.00000005080953346918
0.00000004874122285992
0.00000004675699345554
0.00000004485343215630
0.00000004302726419189
0.00000004127534752467
0.00000003959466747892
0.00000003798233158699
0.00000003643556464363
0.00000003495170396012
0.00000003352819481006
0.00000003216258605927
0.00000003085252597214
0.00000002959575818753
0.00000002839011785725
0.00000002723352794059
0.00000002612399564870
0.00000002505960903257
0.00000002403853370906
0.00000002305900971921
0.00000002211934851361
0.00000002121793005966
0.00000002035320006582
0.00000001952366731809
0.00000001872790112424
0.00000001796452886138
0.00000001723223362279
0.00000001652975195989
0.00000001585587171560
0.00000001520942994535
0.00000001458931092222
0.00000001399444422279
0.00000001342380289047
0.00000001287640167320
0.00000001235129533239
0.00000001184757702041
0.00000001136437672370
0.00000001090085976897
0.00000001045622538979
0.00000001002970535135
0.00000000962056263076
0.00000000922809015095
0.00000000885160956572
0.00000000849047009408
0.00000000814404740177
0.00000000781174252810
0.00000000749298085627
0.00000000718721112540
0.00000000689390448263
0.00000000661255357353
0.00000000634267166950
0.00000000608379183046
0.00000000583546610148
0.00000000559726474197
0.00000000536877548618
0.00000000514960283357
0.00000000493936736805
0.00000000473770510476
0.00000000454426686337
0.00000000435871766677
0.00000000418073616416
0.00000000401001407755
0.00000000384625567067
0.00000000368917723944
0.00000000353850662315
0.00000000339398273540
0.00000000325535511414
0.00000000312238348988
0.00000000299483737154
0.00000000287249564896
0.00000000275514621171
0.00000000264258558318
0.00000000253461856970
0.00000000243105792380
0.00000000233172402112
0.00000000223644455055
0.00000000214505421682
0.00000000205739445525
0.00000000197331315803
0.00000000189266441169
0.00000000181530824512
0.00000000174111038791
0.00000000166994203851
0.00000000160167964172
0.00000000153620467529
0.00000000147340344521
0.00000000141316688922
0.00000000135539038841
0.00000000129997358639
0.00000000124682021587
0.00000000119583793225
0.00000000114693815397
0.00000000110003590938
0.00000000105504968981
0.00000000101190130860
0.00000000097051576591
0.00000000093082111896
0.00000000089274835758
0.00000000085623128485
0.00000000082120640252
0.00000000078761280114
0.00000000075539205465
0.00000000072448811927
0.00000000069484723644
0.00000000066641783981
0.00000000063915046589
0.00000000061299766846
0.00000000058791393635
0.00000000056385561466
0.00000000054078082911
0.00000000051864941350
0.00000000049742284014
0.00000000047706415306
0.00000000045753790400
0.00000000043881009095
0.00000000042084809923
0.00000000040362064494
0.00000000038709772072
0.00000000037125054375
0.00000000035605150580
0.00000000034147412537
0.00000000032749300177
0.00000000031408377105
0.00000000030122306372
0.00000000028888846424
0.00000000027705847209
0.00000000026571246446
0.00000000025483066052
0.00000000024439408699
0.00000000023438454529
0.00000000022478457989
0.00000000021557744804
0.00000000020674709069
0.00000000019827810459
0.00000000019015571553
0.00000000018236575271
0.00000000017489462412
0.00000000016772929289
0.00000000016085725468
0.00000000015426651593
0.00000000014794557305
0.00000000014188339236
0.00000000013606939099
0.00000000013049341843
0.00000000012514573891
0.00000000012001701446
0.00000000011509828870
0.00000000011038097120
0.00000000010585682264
0.00000000010151794037
0.00000000009735674475
0.00000000009336596593
0.00000000008953863118
0.00000000008586805281
0.00000000008234781647
0.00000000007897177006
0.00000000007573401294
0.00000000007262888573
0.00000000006965096043
0.00000000006679503096
0.00000000006405610410
0.00000000006142939082
0.00000000005891029789
0.00000000005649441996
0.00000000005417753178
0.00000000005195558095
0.00000000004982468078
0.00000000004778110355
0.00000000004582127401
0.00000000004394176317
0.00000000004213928229
0.00000000004041067716
0.00000000003875292262
0.00000000003716311725
0.00000000003563847837
0.00000000003417633712
0.00000000003277413386
0.00000000003142941367
0.00000000003013982208
0.00000000002890310100
0.00000000002771708472
0.00000000002657969617
0.00000000002548894327
0.00000000002444291551
0.00000000002343978054
0.00000000002247778103
0.00000000002155523158
0.00000000002067051578
0.00000000001982208339
0.00000000001900844763
0.00000000001822818261
0.00000000001747992078
0.00000000001676235063
0.00000000001607421430
0.00000000001541430547
0.00000000001478146721
0.00000000001417458996
0.00000000001359260959
0.00000000001303450557
0.00000000001249929915
0.00000000001198605167
0.00000000001149386293
0.00000000001102186957
0.00000000001056924362
0.00000000001013519103
0.00000000000971895025
0.00000000000931979096
0.00000000000893701274
0.00000000000856994386
0.00000000000821794013
0.00000000000788038375
0.00000000000755668222
0.00000000000724626733
0.00000000000694859415
0.00000000000666314009
0.00000000000638940396
0.00000000000612690511
0.00000000000587518261
0.00000000000563379440
0.00000000000540231655
0.00000000000518034249
0.00000000000496748234
0.00000000000476336218
0.00000000000456762343
0.00000000000437992221
0.00000000000419992873
0.00000000000402732672
0.00000000000386181288
0.00000000000370309635
0.00000000000355089820
0.00000000000340495092
0.00000000000326499798
0.00000000000313079336
0.00000000000300210116
0.00000000000287869510
0.00000000000276035823
0.00000000000264688247
0.00000000000253806829
0.00000000000243372433
0.00000000000233366709
0.00000000000223772058
0.00000000000214571606
0.00000000000205749167
0.00000000000197289223
0.00000000000189176890
0.00000000000181397896
0.00000000000173938554
0.00000000000166785738
0.00000000000159926862
0.00000000000153349855
0.00000000000147043142
0.00000000000140995622
0.00000000000135196652
0.00000000000129636023
0.00000000000124303947
0.00000000000119191035
0.00000000000114288287
0.00000000000109587070
0.00000000000105079106
0.00000000000100756455
0.00000000000096611507
0.00000000000092636960
0.00000000000088825815
0.00000000000085171358
0.00000000000081667152
0.00000000000078307024
0.00000000000075085053
0.00000000000071995565
0.00000000000069033113
0.00000000000066192480
0.00000000000063468659
0.00000000000060856849
0.00000000000058352448
0.00000000000055951042
0.00000000000053648398
0.00000000000051440456
0.00000000000049323326
0.00000000000047293273
0.00000000000045346720
0.00000000000043480233
0.00000000000041690522
0.00000000000039974432
0.00000000000038328935
0.00000000000036751129
0.00000000000035238232
0.00000000000033787576
0.00000000000032396601
0.00000000000031062854
0.00000000000029783981
0.00000000000028557728
0.00000000000027381929
0.00000000000026254511
0.00000000000025173484
0.00000000000024136940
0.00000000000023143050
0.00000000000022190061
0.00000000000021276289
0.00000000000020400123
0.00000000000019560016
0.00000000000018754483
0.00000000000017982105
0.00000000000017241516
0.00000000000016531410
0.00000000000015850532
0.00000000000015197680
0.00000000000014571702
0.00000000000013971491
0.00000000000013395988
0.00000000000012844177
0.00000000000012315082
0.00000000000011807769
0.00000000000011321342
0.00000000000010854942
0.00000000000010407745
0.00000000000009978960
0.00000000000009567829
0.00000000000009173627
0.00000000000008795657
0.00000000000008433251
0.00000000000008085768
0.00000000000007752594
0.00000000000007433141
0.00000000000007126844
0.00000000000006833160
0.00000000000006551572
0.00000000000006281581
0.00000000000006022709
0.00000000000005774500
0.00000000000005536515
0.00000000000005308331
0.00000000000005089547
0.00000000000004879775
0.00000000000004678644
0.00000000000004485798
0.00000000000004300897
0.00000000000004123612
0.00000000000003953631
0.00000000000003790653
0.00000000000003634390
0.00000000000003484565
0.00000000000003340912
0.00000000000003203179
0.00000000000003071120
0.00000000000002944503
0.00000000000002823103
0.00000000000002706706
0.00000000000002595105
0.00000000000002488102
0.00000000000002385510
0.00000000000002287145
0.00000000000002192834
0.00000000000002102410
0.00000000000002015712
0.00000000000001932588
0.00000000000001852890
0.00000000000001776476
0.00000000000001703213
0.00000000000001632969
0.00000000000001565620
0.00000000000001501048
0.00000000000001439137
0.00000000000000000000
73.48812846812228372073
140.77331609144627577734
202.24824338782684662874
258.28349411768857635252
309.22872098998772116829
355.41375233165842928429
397.14964262736162936562
434.72966969615146126671
468.43028113812721358045
498.51199255693518352928
525.22023994283097181324
548.78618848561734466784
569.42749997687542418134
587.34906085624049865146
602.74367285679511496710
615.79270810972968774877
626.66673047802726159716
635.52608480284993675014
642.52145566434467127692
647.79439718053720298485
651.47783529367654864473
653.69654392264146736125
654.56759629265479816240
654.20079268942936323583
652.69906582380542658939
650.15886493482844343816
646.67051970388445170101
642.31858499983809451805
637.18216742499703286740
631.33523458400350136799
624.84690795233268545417
617.78174017786545846320
610.19997760784849560878
602.15780879441592787771
593.70759969458379146090
584.89811624517733434914
575.77473495941126202524
566.37964215974591297709
556.75202243109629307583
546.92823684941186002106
536.94199151299721961550
526.82449687764403734036
516.60461837161733456014
506.30901874274240981322
495.96229256719726663505
485.58709332807649161623
475.20425345131286576361
464.83289766706303680621
454.49055004613359187715
444.19323504340582076111
433.95557286346888758999
423.79086944773104050910
413.71120136713722104105
403.72749589021594829319
393.84960648248727466125
384.08638398024555726806
374.44574366935398757050
364.93472848792941931606
355.55956856061095550103
346.32573726147876413961
337.23800399259471305413
328.30048385553027401329
319.51668438413196327019
310.88954949810505468122
302.42150082876031547130
294.11447656044407494846
285.96996792374056894914
277.98905346947043426553
270.17243124580261337542
262.52044899442637415632
255.03313247567575672292
247.71021202675365202595
240.55114745174296331243
233.55515133691056917087
226.72121087988776366728
220.04810831663922954249
213.53444002569656845480
207.17863438492057071016
200.97896845206173566112
194.93358353659255044477
189.04049972668633472495
183.29762943180051593117
177.70278999807848663295
172.25371545071109835590
166.94806741447817444168
161.78344526092266164596
156.75739552798509635068
151.86742065543296575925
147.11098707706071309076
142.48553270839315132434
137.98847386650419366561
133.61721165654654441823
129.36913785768155094047
125.24164033928809658391
121.23210803661341117277
117.33793551340743022138
113.55652713753818261466
109.88530089412810752947
106.32169185937310373902
102.86315535688893874067
99.50716981719827458619
96.25123935979185318956
93.09289611608726033865
90.02970231055775229834
87.05925211630386684192
84.17917330040194201501
81.38712867346664836532
78.68081735702442358615
76.05797588149340526797
73.51637912680985209590
71.05384111702882421469
68.66821567954731619920
66.35739697896327982107
64.11931993497699977524
61.95196053317151552164
59.85333603697035442792
57.82150510855948510880
55.85456784608069824571
53.95066574394804348458
52.10798158271011004672
50.32473925447590090698
48.59920352953871969248
46.92967976947337405136
45.31451359163936132290
43.75209048970347680552
42.24083541449162026993
40.77921231919348343808
39.36572367267687155845
37.99890994441211944377
36.67734906427077845592
35.39965586023649990466
34.16448147685424885367
32.97051277704601801588
31.81647172973198678392
30.70111478552152206589
29.62323224257100307000
28.58164760455103703407
27.57521693251839778327
26.60282819235045437267
25.66340059927153660624
24.75588396087873732654
23.87925801996130203975
23.03253179830137753470
22.21474294254349146627
21.42495707312744812612
20.66226713719056817808
19.92579276626445405896
19.21467963951367963205
18.52809885319300420292
17.86524629693233023886
17.22534203739587610471
16.60762970980462682746
16.01137591775554724904
15.43586964172144071483
14.88042165656768744952
14.34436395837805022779
13.82704920084175448380
13.32785014141522772491
12.84615909743768646933
12.38138741234673290137
11.93296493210999820178
11.50033949196175875329
11.08297641350665330151
10.68035801223017244865
10.29198311543286692427
9.91736659058589431481
9.55603888408677093480
9.20754557037749599147
8.87144691137212504373
8.54731742612645817303
8.23474547067021944713
7.93333282791041494164
7.64269430750400502461
7.36245735558911462704
7.09226167425506837105
6.83175885062459009589
6.58061199541439112437
6.33849539083493329628
6.10509414768478109181
5.88010387149054913891
5.66323033753981341931
5.45418917465087815799
5.25270555752086387713
5.05851390749126128554
4.87135760156836905566
4.69098868953496062062
4.51716761898835006406
4.34966296813976871505
4.18825118620968428473
4.03271634125378319879
3.88284987525486569027
3.73845036631650007308
3.59932329779516280155
3.46528083420884414068
3.33614160376135027164
3.21173048732294175167
3.09187841370981120193
2.97642216110648272220
2.86520416447736936405
2.75807232881557728987
2.65487984807931365339
2.55548502966846280415
2.45975112429614828358
2.36754616111261428912
2.27874278794106244206
2.19321811648765407909
2.11085357239034587806
2.03153474997389071888
1.95515127158080592729
1.88159665135078535414
1.81076816332363543793
1.74256671374338867331
1.67689671744397328368
1.61366597819931678615
1.55278557292346053309
1.49416973960883647798
1.43773576889338916551
1.38340389914990713471
1.33109721499334821004
1.28074154910453286149
1.23226538727106849080
1.18559977654877246600
1.14067823644938792782
1.09743667306269543360
1.05581329602353157782
1.01574853823655630869
0.97718497827386319177
0.94006726536283991003
0.90434204688384101090
0.86995789829943948046
0.83686525543916268077
0.80501634906567454131
0.77436514165047320990
0.74486726628913291215
0.71647996768811472723
0.68916204515709178491
0.66287379754261988030
0.63757697004082880543
0.61323470282861147762
0.58981148145455797316
0.56727308893257721856
0.54558655948287115844
0.52472013386652416322
0.50464321626159558409
0.48532633263015917402
0.46674109052724221947
0.44886014030412851872
0.43165713765990276762
0.41510670749654282607
0.39918440903423713095
0.38386670214492174535
0.36913091486335919411
0.35495521203632279805
0.34131856507169133774
0.32820072275045669707
0.31558218306580121393
0.30344416605455004632
0.29176858758738749566
0.28053803408530231245
0.26973573813076906491
0.25934555494316935409
0.24935193968895433270
0.23973992559798365520
0.23049510285841071089
0.22160359826337872047
0.21305205558365461482
0.20482761664118692702
0.19691790305937723060
0.18931099866666073472
0.18199543253075198268
0.17496016260167210343
0.16819455994238444174
0.16168839352657679576
0.15543181558380794738
0.14941534747288953699
0.14362986606502498033
0.13806659061883547190
0.13271707013000927367
0.12757317113889060645
0.12262706597988570767
0.11787122145711115273
0.11329838793123514495
0.10890158880297472199
0.10467411037920718031
0.10060949210812890342
0.09670151717036500061
0.09294420341337464309
0.08933179461693604995
0.08585875207791035524
0.08251974650289518876
0.07930965019776664571
0.07622352954349109755
0.07325663774795575234
0.07040440786391979899
0.06766244606353624680
0.06502652516022219831
0.06249257836897915974
0.06005669329657559868
0.05771510615330190108
0.05546419617830181809
0.05330048027076113998
0.05122060781950773384
0.04922135572383842805
0.04729962359863998378
0.04545242915711848047
0.04367690376468515850
0.04197028815777588406
0.04032992832160259278
0.03875327152104580952
0.03723786247910573083
0.03578133969752564369
0.03438143191439400198
0.03303595469371740229
0.03174280714213334464
0.03049996874810737349
0.02930549633912277185
0.02815752115253372309
0.02705424601590794217
0.02599394263283325707
0.02497494897030985705
0.02399566674398664889
0.02305455899763782582
0.02215014777340257660
0.02128101186943974141
0.02044578468176765779
0.01964315212717763701
0.01887185064422190056
0.01813066526938520925
0.01741842778565512798
0.01673401494080624385
0.01607634673281170545
0.01544438475988977981
0.01483713063278314405
0.01425362444695754335
0.01369294331248957497
0.01315419993949582499
0.01263654127703336960
0.01213914720347838462
0.01166122926646127704
0.01120202947050907144
0.01076081911061130443
0.01033689764999398165
0.00992959164044614900
0.00953825368360755599
0.00916226143168235793
0.00880101662610095758
0.00845394417270740189
0.00812049125210086674
0.00780012646381194295
0.00749233900304161794
0.00719663786873969528
0.00691255110184265786
0.00663962505253698401
0.00637742367545367748
0.00612552785174244954
0.00588353473701132886
0.00565105713415654538
0.00542772289014268119
0.00521317431582911991
0.00500706762797134552
0.00480907241255940435
0.00461887110868568554
0.00443615851216579236
0.00426064129816385462
0.00409203756210283539
0.00393007637816628237
0.00377449737472473207
0.00362505032604427306
0.00348149475965948627
0.00334359957881546436
0.00321114269940659747
0.00308391070086070631
0.00296169849043842253
0.00284430898043688861
0.00273155277780693425
0.00262324788571048672
0.00251921941656355714
0.00241929931612658517
0.00232332609822109371
0.00223114458966684444
0.00214260568504960917
0.00205756611094380345
0.00197588819922902333
0.00189743966915249221
0.00182209341780333284
0.00174972731867650204
0.00168022402801696951
0.00161347079864613998
0.00154935930098384043
0.00148778545099026026
0.00142864924476235398
0.00137185459952968917
0.00131730920080394575
0.00126492435544611911
0.00121461485042396013
0.00116629881704122989
0.00111989760042834302
0.00107533563409226152
0.00103254031933092756
0.00099144190932520153
0.00095197339772814952
0.00091407041157865571
0.00087767110837263097
0.00084271607713179702
0.00080914824331580510
0.00077691277742960305
0.00074595700718342584
0.00071623033306840358
0.00068768414721586454
0.00066027175541360985
0.00063394830215715168
0.00060867069861868131
0.00058439755342095962
0.00056108910610770419
0.00053870716320612085
0.00051721503678134415
0.00049657748538626915
0.00047676065731409401
0.00045773203606432273
0.00043946038793652836
0.00042191571166936594
0.00040506919004557344
0.00038889314338669701
0.00037336098486425985
0.00035844717755684772
0.00034412719318538328
0.00033037747246138579
0.00031717538698559721
0.00030449920263672501
0.00029232804439238626
0.00028064186252658253
0.00026942140013016771
0.00025864816190286025
0.00024830438416729869
0.00023837300605760638
0.00022883764183670820
0.00021968255429847053
0.00021089262921237655
0.00020245335077013999
0.00019435077799518337
0.00018657152207745385
0.00017910272459748213
0.00017193203660500594
0.00016504759851879676
0.00015843802081565752
0.00015209236547776152
0.00014600012816873756
0.00014015122111001664
0.00013453595663009705
0.00012914503136041456
0.00012396951105254984
0.00011900081599247053
0.00011423070698846550
0.00010965127191031467
0.00010525491275813704
0.00010103433324017098
0.00009698252683957410
0.00009309276535107925
0.00008935858786911394
0.00008577379020968467
0.00008233241474903310
0.00007902874066272290
0.00007585727454946165
0.00007281274142456166
0.00006989007606854862
0.00006708441471697410
0.00006439108707804967
0.00006180560866522591
0.00005932367343235764
0.00005694114669956594
0.00005465405835838050
0.00005245859634519064
0.00005035110037245584
0.00004832805590754934
0.00004638608838949298
0.00004452195767423328
0.00004273255269946397
0.00004101488636036229
0.00003936609058793519
0.00003778341162200317
0.00003626420547115764
0.00003480593355233138
0.00003340615850290487
0.00003206254015855531
0.00003077283169031418
0.00002953487589456251
0.00002834660162993181
0.00002720602039532207
0.00002611122304346932
0.00002506037662471806
0.00002405172135586082
0.00002308356770911165
0.00002215429361646970
0.00002126234178492110
0.00002040621711810022
0.00001958448424020880
0.00001879576511815191
0.00001803873677801274
0.00001731212911213704
0.00001661472277324746
0.00001594534715214699
0.00001530287843570791
0.00001468623774197000
0.00001409438932930023
0.00001352633887668258
0.00001298113183232536
0.00001245785182788115
0.00001195561915568395
0.00001147358930650776
0.00001101095156545116
0.00001056692766364559
0.00001014077048357703
0.00000973176281589625
0.00000933921616567857
0.00000896246960617306
0.00000860088867815876
0.00000825386433310067
0.00000792081191836819
0.00000760117020284849
0.00000729440044135233
0.00000699998547627398
0.00000671742887502643
0.00000644625410183305
0.00000618600372251144
0.00000593623864094049
0.00000569653736595198
0.00000546649530743960
0.00000524572410052400
0.00000503385095666030
0.00000483051804061701
0.00000463538187229910
0.00000444811275242707
0.00000426839421112469
0.00000409592247850392
0.00000393040597637308
0.00000377156483022778
0.00000361913040071842
0.00000347284483381889
0.00000333246062895320
0.00000319774022436488
0.00000306845559904331
0.00000294438789054781
0.00000282532702809672
0.00000271107138031363
0.00000260142741704722
0.00000249620938470400
0.00000239523899455611
0.00000229834512350666
0.00000220536352681700
0.00000211613656231854
0.00000203051292565197
0.00000194834739609388
0.00000186950059254903
0.00000179383873930272
0.00000172123344114415
0.00000165156146748697
0.00000158470454512822
0.00000152054915930090
0.00000145898636268933
0.00000139991159208960
0.00000134322449240977
0.00000128882874771716
0.00000123663191905103
0.00000118654528873088
0.00000113848371090066
0.00000109236546806010
0.00000104811213334380
0.00000100564843831866
0.00000096490214607897
0.00000092580392942762
0.00000088828725394010
0.00000085228826571610
0.00000081774568363138
0.00000078460069590998
0.00000075279686084390
0.00000072228001149462
0.00000069299816421697
0.00000066490143085257
0.00000063794193444604
0.00000061207372834300
0.00000058725271853451
0.00000056343658911807
0.00000054058473075045
0.00000051865817197250
0.00000049761951329104
0.00000047743286390741
0.00000045806378098668
0.00000043947921136577
0.00000042164743560278
0.00000040453801427383
0.00000038812173642712
0.00000037237057010815
0.00000035725761487271
0.00000034275705620824
0.00000032884412178695
0.00000031549503947728
0.00000030268699704324
0.00000029039810346391
0.00000027860735180811
0.00000026729458360194
0.00000025644045462927
0.00000024602640210764
0.00000023603461318448
0.00000022644799470064
0.00000021725014417029
0.00000020842532192857
0.00000019995842439988
0.00000019183495844196
0.00000018404101672261
0.00000017656325408745
0.00000016938886487906
0.00000016250556116914
0.00000015590155186724
0.00000014956552267056
0.00000014348661682136
0.00000013765441663917
0.00000013205892579705
0.00000012669055231164
0.00000012154009221860
0.00000011659871390567
0.00000011185794307711
0.00000010730964832395
0.00000010294602727582
0.00000009875959331098
0.00000009474316280195
0.00000009088984287540
0.00000008719301966548
0.00000008364634704076
0.00000008024373578581
0.00000007697934321897
0.00000007384756322890
0.00000007084301671303
0.00000006796054240166
0.00000006519518805224
0.00000006254220199897
0.00000005999702504331
0.00000005755528267177
0.00000005521277758776
0.00000005296548254482
0.00000005080953346918
0.00000004874122285992
0.00000004675699345554
0.00000004485343215630
0.00000004302726419189
0.00000004127534752467
0.00000003959466747892
0.00000003798233158699
0.00000003643556464363
0.00000003495170396012
0.00000003352819481006
0.00000003216258605927
0.00000003085252597214
0.00000002959575818753
0.00000002839011785725
0.00000002723352794059
0.00000002612399564870
0.00000002505960903257
0.00000002403853370906
0.00000002305900971921
0.00000002211934851361
0.00000002121793005966
0.00000002035320006582
0.00000001952366731809
0.00000001872790112424
0.00000001796452886138
0.00000001723223362279
0.00000001652975195989
0.00000001585587171560
0.00000001520942994535
0.00000001458931092222
0.00000001399444422279
0.00000001342380289047
0.00000001287640167320
0.00000001235129533239
0.00000001184757702041
0.00000001136437672370
0.00000001090085976897
0.00000001045622538979
0.00000001002970535135
0.00000000962056263076
0.00000000922809015095
0.00000000885160956572
0.00000000849047009408
0.00000000814404740177
0.00000000781174252810
0.00000000749298085627
0.00000000718721112540
0.00000000689390448263
0.00000000661255357353
0.00000000634267166950
0.00000000608379183046
0.00000000583546610148
0.00000000559726474197
0.00000000536877548618
0.00000000514960283357
0.00000000493936736805
0.00000000473770510476
0.00000000454426686337
0.00000000435871766677
0.00000000418073616416
0.00000000401001407755
0.00000000384625567067
0.00000000368917723944
0.00000000353850662315
0.00000000339398273540
0.00000000325535511414
0.00000000312238348988
0.00000000299483737154
0.00000000287249564896
0.00000000275514621171
0.00000000264258558318
0.00000000253461856970
0.00000000243105792380
0.00000000233172402112
0.00000000223644455055
0.00000000214505421682
0.00000000205739445525
0.00000000197331315803
0.00000000189266441169
0.00000000181530824512
0.00000000174111038791
0.00000000166994203851
0.00000000160167964172
0.00000000153620467529
0.00000000147340344521
0.00000000141316688922
0.00000000135539038841
0.00000000129997358639
0.00000000124682021587
0.00000000119583793225
0.00000000114693815397
0.00000000110003590938
0.00000000105504968981
0.00000000101190130860
0.00000000097051576591
0.00000000093082111896
0.00000000089274835758
0.00000000085623128485
0.00000000082120640252
0.00000000078761280114
0.00000000075539205465
0.00000000072448811927
0.00000000069484723644
0.00000000066641783981
0.00000000063915046589
0.00000000061299766846
0.00000000058791393635
0.00000000056385561466
0.00000000054078082911
0.00000000051864941350
0.00000000049742284014
0.00000000047706415306
0.00000000045753790400
0.00000000043881009095
0.00000000042084809923
0.00000000040362064494
0.00000000038709772072
0.00000000037125054375
0.00000000035605150580
0.00000000034147412537
0.00000000032749300177
0.00000000031408377105
0.00000000030122306372
0.00000000028888846424
0.00000000027705847209
0.00000000026571246446
0.00000000025483066052
0.00000000024439408699
0.00000000023438454529
0.00000000022478457989
0.00000000021557744804
0.00000000020674709069
0.00000000019827810459
0.00000000019015571553
0.00000000018236575271
0.00000000017489462412
0.00000000016772929289
0.00000000016085725468
0.00000000015426651593
0.00000000014794557305
0.00000000014188339236
0.00000000013606939099
0.00000000013049341843
0.00000000012514573891
0.00000000012001701446
0.00000000011509828870
0.00000000011038097120
0.00000000010585682264
0.00000000010151794037
0.00000000009735674475
0.00000000009336596593
0.00000000008953863118
0.00000000008586805281
0.00000000008234781647
0.00000000007897177006
0.00000000007573401294
0.00000000007262888573
0.00000000006965096043
0.00000000006679503096
0.00000000006405610410
0.00000000006142939082
0.00000000005891029789
0.00000000005649441996
0.00000000005417753178
0.00000000005195558095
0.00000000004982468078
0.00000000004778110355
0.00000000004582127401
0.00000000004394176317
0.00000000004213928229
0.00000000004041067716
0.00000000003875292262
0.00000000003716311725
0.00000000003563847837
0.00000000003417633712
0.00000000003277413386
0.00000000003142941367
0.00000000003013982208
0.00000000002890310100
0.00000000002771708472
0.00000000002657969617
0.00000000002548894327
0.00000000002444291551
0.00000000002343978054
0.00000000002247778103
0.00000000002155523158
0.00000000002067051578
0.00000000001982208339
0.00000000001900844763
0.00000000001822818261
0.00000000001747992078
0.00000000001676235063
0.00000000001607421430
0.00000000001541430547
0.00000000001478146721
0.00000000001417458996
0.00000000001359260959
0.00000000001303450557
0.00000000001249929915
0.00000000001198605167
0.00000000001149386293
0.00000000001102186957
0.00000000001056924362
0.00000000001013519103
0.00000000000971895025
0.00000000000931979096
0.00000000000893701274
0.00000000000856994386
0.00000000000821794013
0.00000000000788038375
0.00000000000755668222
0.00000000000724626733
0.00000000000694859415
0.00000000000666314009
0.00000000000638940396
0.00000000000612690511
0.00000000000587518261
0.00000000000563379440
0.00000000000540231655
0.00000000000518034249
0.00000000000496748234
0.00000000000476336218
0.00000000000456762343
0.00000000000437992221
0.00000000000419992873
0.00000000000402732672
0.00000000000386181288
0.00000000000370309635
0.00000000000355089820
0.00000000000340495092
0.00000000000326499798
0.00000000000313079336
0.00000000000300210116
0.00000000000287869510
0.00000000000276035823
0.00000000000264688247
0.00000000000253806829
0.00000000000243372433
0.00000000000233366709
0.00000000000223772058
0.00000000000214571606
0.00000000000205749167
0.00000000000197289223
0.00000000000189176890
0.00000000000181397896
0.00000000000173938554
0.00000000000166785738
0.00000000000159926862
0.00000000000153349855
0.00000000000147043142
0.00000000000140995622
0.00000000000135196652
0.00000000000129636023
0.00000000000124303947
0.00000000000119191035
0.00000000000114288287
0.00000000000109587070
0.00000000000105079106
0.00000000000100756455
0.00000000000096611507
0.00000000000092636960
0.00000000000088825815
0.00000000000085171358
0.00000000000081667152
0.00000000000078307024
0.00000000000075085053
0.00000000000071995565
0.00000000000069033113
0.00000000000066192480
0.00000000000063468659
0.00000000000060856849
0.00000000000058352448
0.00000000000055951042
0.00000000000053648398
0.00000000000051440456
0.00000000000049323326
0.00000000000047293273
0.00000000000045346720
0.00000000000043480233
0.00000000000041690522
0.00000000000039974432
0.00000000000038328935
0.00000000000036751129
0.00000000000035238232
0.00000000000033787576
0.00000000000032396601
0.00000000000031062854
0.00000000000029783981
0.00000000000028557728
0.00000000000027381929
0.00000000000026254511
0.00000000000025173484
0.00000000000024136940
0.00000000000023143050
0.00000000000022190061
0.00000000000021276289
0.00000000000020400123
0.00000000000019560016
0.00000000000018754483
0.00000000000017982105
0.00000000000017241516
0.00000000000016531410
0.00000000000015850532
0.00000000000015197680
0.00000000000014571702
0.00000000000013971491
0.00000000000013395988
0.00000000000012844177
0.00000000000012315082
0.00000000000011807769
0.00000000000011321342
0.00000000000010854942
0.00000000000010407745
0.00000000000009978960
0.00000000000009567829
0.00000000000009173627
0.00000000000008795657
0.00000000000008433251
0.00000000000008085768
0.00000000000007752594
0.00000000000007433141
0.00000000000007126844
0.00000000000006833160
0.00000000000006551572
0.00000000000006281581
0.00000000000006022709
0.00000000000005774500
0.00000000000005536515
0.00000000000005308331
0.00000000000005089547
0.00000000000004879775
0.00000000000004678644
0.00000000000004485798
0.00000000000004300897
0.00000000000004123612
0.00000000000003953631
0.00000000000003790653
0.00000000000003634390
0.00000000000003484565
0.00000000000003340912
0.00000000000003203179
0.00000000000003071120
0.00000000000002944503
0.00000000000002823103
0.00000000000002706706
0.00000000000002595105
0.00000000000002488102
0.00000000000002385510
0.00000000000002287145
0.00000000000002192834
0.00000000000002102410
0.00000000000002015712
0.00000000000001932588
0.00000000000001852890
0.00000000000001776476
0.00000000000001703213
0.00000000000001632969
0.00000000000001565620
0.00000000000001501048
0.00000000000001439137
0.00000000000000000000
73.48812846812228372073
140.77331609144627577734
202.24824338782684662874
258.28349411768857635252
309.22872098998772116829
355.41375233165842928429
397.14964262736162936562
434.72966969615146126671
468.43028113812721358045
498.51199255693518352928
525.22023994283097181324
548.78618848561734466784
569.42749997687542418134
587.34906085624049865146
602.74367285679511496710
615.79270810972968774877
626.66673047802726159716
635.52608480284993675014
642.52145566434467127692
647.79439718053720298485
651.47783529367654864473
653.69654392264146736125
654.56759629265479816240
654.20079268942936323583
652.69906582380542658939
650.15886493482844343816
646.67051970388445170101
642.31858499983809451805
637.18216742499703286740
631.33523458400350136799
624.84690795233268545417
617.78174017786545846320
610.19997760784849560878
602.15780879441592787771
593.70759969458379146090
584.89811624517733434914
575.77473495941126202524
566.37964215974591297709
556.75202243109629307583
546.92823684941186002106
536.94199151299721961550
526.82449687764403734036
516.60461837161733456014
506.30901874274240981322
495.96229256719726663505
485.58709332807649161623
475.20425345131286576361
464.83289766706303680621
454.49055004613359187715
444.19323504340582076111
433.95557286346888758999
423.79086944773104050910
413.71120136713722104105
403.72749589021594829319
393.84960648248727466125
384.08638398024555726806
374.44574366935398757050
364.93472848792941931606
355.55956856061095550103
346.32573726147876413961
337.23800399259471305413
328.30048385553027401329
319.51668438413196327019
310.88954949810505468122
302.42150082876031547130
294.11447656044407494846
285.96996792374056894914
277.98905346947043426553
270.17243124580261337542
262.52044899442637415632
255.03313247567575672292
247.71021202675365202595
240.55114745174296331243
233.55515133691056917087
226.72121087988776366728
220.04810831663922954249
213.53444002569656845480
207.17863438492057071016
200.97896845206173566112
194.93358353659255044477
189.04049972668633472495
183.29762943180051593117
177.70278999807848663295
172.25371545071109835590
166.94806741447817444168
161.78344526092266164596
156.75739552798509635068
151.86742065543296575925
147.11098707706071309076
142.48553270839315132434
137.98847386650419366561
133.61721165654654441823
129.36913785768155094047
125.24164033928809658391
121.23210803661341117277
117.33793551340743022138
113.55652713753818261466
109.88530089412810752947
106.32169185937310373902
102.86315535688893874067
99.50716981719827458619
96.25123935979185318956
93.09289611608726033865
90.02970231055775229834
87.05925211630386684192
84.17917330040194201501
81.38712867346664836532
78.68081735702442358615
76.05797588149340526797
73.51637912680985209590
71.05384111702882421469
68.66821567954731619920
66.35739697896327982107
64.11931993497699977524
61.95196053317151552164
59.85333603697035442792
57.82150510855948510880
55.85456784608069824571
53.95066574394804348458
52.10798158271011004672
50.32473925447590090698
48.59920352953871969248
46.92967976947337405136
45.31451359163936132290
43.75209048970347680552
42.24083541449162026993
40.77921231919348343808
39.36572367267687155845
37.99890994441211944377
36.67734906427077845592
35.39965586023649990466
34.16448147685424885367
32.97051277704601801588
31.81647172973198678392
30.70111478552152206589
29.62323224257100307000
28.58164760455103703407
27.57521693251839778327
26.60282819235045437267
25.66340059927153660624
24.75588396087873732654
23.87925801996130203975
23.03253179830137753470
22.21474294254349146627
21.42495707312744812612
20.66226713719056817808
19.92579276626445405896
19.21467963951367963205
18.52809885319300420292
17.86524629693233023886
17.22534203739587610471
16.60762970980462682746
16.01137591775554724904
15.43586964172144071483
14.88042165656768744952
14.34436395837805022779
13.82704920084175448380
13.32785014141522772491
12.84615909743768646933
12.38138741234673290137
11.93296493210999820178
11.50033949196175875329
11.08297641350665330151
10.68035801223017244865
10.29198311543286692427
9.91736659058589431481
9.55603888408677093480
9.20754557037749599147
8.87144691137212504373
8.54731742612645817303
8.23474547067021944713
7.93333282791041494164
7.64269430750400502461
7.36245735558911462704
7.09226167425506837105
6.83175885062459009589
6.58061199541439112437
6.33849539083493329628
6.10509414768478109181
5.88010387149054913891
5.66323033753981341931
5.45418917465087815799
5.25270555752086387713
5.05851390749126128554
4.87135760156836905566
4.69098868953496062062
4.51716761898835006406
4.34966296813976871505
4.18825118620968428473
4.03271634125378319879
3.88284987525486569027
3.73845036631650007308
3.59932329779516280155
3.46528083420884414068
3.33614160376135027164
3.21173048732294175167
3.09187841370981120193
2.97642216110648272220
2.86520416447736936405
2.75807232881557728987
2.65487984807931365339
2.55548502966846280415
2.45975112429614828358
2.36754616111261428912
2.27874278794106244206
2.19321811648765407909
2.11085357239034587806
2.03153474997389071888
1.95515127158080592729
1.88159665135078535414
1.81076816332363543793
1.74256671374338867331
1.67689671744397328368
1.61366597819931678615
1.55278557292346053309
1.49416973960883647798
1.43773576889338916551
1.38340389914990713471
1.33109721499334821004
1.28074154910453286149
1.23226538727106849080
1.18559977654877246600
1.14067823644938792782
1.09743667306269543360
1.05581329602353157782
1.01574853823655630869
0.97718497827386319177
0.94006726536283991003
0.90434204688384101090
0.86995789829943948046
0.83686525543916268077
0.80501634906567454131
0.77436514165047320990
0.74486726628913291215
0.71647996768811472723
0.68916204515709178491
0.66287379754261988030
0.63757697004082880543
0.61323470282861147762
0.58981148145455797316
0.56727308893257721856
0.54558655948287115844
0.52472013386652416322
0.50464321626159558409
0.48532633263015917402
0.46674109052724221947
0.44886014030412851872
0.43165713765990276762
0.41510670749654282607
0.39918440903423713095
0.38386670214492174535
0.36913091486335919411
0.35495521203632279805
0.34131856507169133774
0.32820072275045669707
0.31558218306580121393
0.30344416605455004632
0.29176858758738749566
0.28053803408530231245
0.26973573813076906491
0.25934555494316935409
0.24935193968895433270
0.23973992559798365520
0.23049510285841071089
0.22160359826337872047
0.21305205558365461482
0.20482761664118692702
0.19691790305937723060
0.18931099866666073472
0.18199543253075198268
0.17496016260167210343
0.16819455994238444174
0.16168839352657679576
0.15543181558380794738
0.14941534747288953699
0.14362986606502498033
0.13806659061883547190
0.13271707013000927367
0.12757317113889060645
0.12262706597988570767
0.11787122145711115273
0.11329838793123514495
0.10890158880297472199
0.10467411037920718031
0.10060949210812890342
0.09670151717036500061
0.09294420341337464309
0.08933179461693604995
0.08585875207791035524
0.08251974650289518876
0.07930965019776664571
0.07622352954349109755
0.07325663774795575234
0.07040440786391979899
0.06766244606353624680
0.06502652516022219831
0.06249257836897915974
0.06005669329657559868
0.05771510615330190108
0.05546419617830181809
0.05330048027076113998
0.05122060781950773384
0.04922135572383842805
0.04729962359863998378
0.04545242915711848047
0.04367690376468515850
0.04197028815777588406
0.04032992832160259278
0.03875327152104580952
0.03723786247910573083
0.03578133969752564369
0.03438143191439400198
0.03303595469371740229
0.03174280714213334464
0.03049996874810737349
0.02930549633912277185
0.02815752115253372309
0.02705424601590794217
0.02599394263283325707
0.02497494897030985705
0.02399566674398664889
0.02305455899763782582
0.02215014777340257660
0.02128101186943974141
0.02044578468176765779
0.01964315212717763701
0.01887185064422190056
0.01813066526938520925
0.01741842778565512798
0.01673401494080624385
0.01607634673281170545
0.01544438475988977981
0.01483713063278314405
0.01425362444695754335
0.01369294331248957497
0.01315419993949582499
0.01263654127703336960
0.01213914720347838462
0.01166122926646127704
0.01120202947050907144
0.01076081911061130443
0.01033689764999398165
0.00992959164044614900
0.00953825368360755599
0.00916226143168235793
0.00880101662610095758
0.00845394417270740189
0.00812049125210086674
0.00780012646381194295
0.00749233900304161794
0.00719663786873969528
0.00691255110184265786
0.00663962505253698401
0.00637742367545367748
0.00612552785174244954
0.00588353473701132886
0.00565105713415654538
0.00542772289014268119
0.00521317431582911991
0.00500706762797134552
0.00480907241255940435
0.00461887110868568554
0.00443615851216579236
0.00426064129816385462
0.00409203756210283539
0.00393007637816628237
0.00377449737472473207
0.00362505032604427306
0.00348149475965948627
0.00334359957881546436
0.00321114269940659747
0.00308391070086070631
0.00296169849043842253
0.00284430898043688861
0.00273155277780693425
0.00262324788571048672
0.00251921941656355714
0.00241929931612658517
0.00232332609822109371
0.00223114458966684444
0.00214260568504960917
0.00205756611094380345
0.00197588819922902333
0.00189743966915249221
0.00182209341780333284
0.00174972731867650204
0.00168022402801696951
0.00161347079864613998
0.00154935930098384043
0.00148778545099026026
0.00142864924476235398
0.00137185459952968917
0.00131730920080394575
0.00126492435544611911
0.00121461485042396013
0.00116629881704122989
0.00111989760042834302
0.00107533563409226152
0.00103254031933092756
0.00099144190932520153
0.00095197339772814952
0.00091407041157865571
0.00087767110837263097
0.00084271607713179702
0.00080914824331580510
0.00077691277742960305
0.00074595700718342584
0.00071623033306840358
0.00068768414721586454
0.00066027175541360985
0.00063394830215715168
0.00060867069861868131
0.00058439755342095962
0.00056108910610770419
0.00053870716320612085
0.00051721503678134415
0.00049657748538626915
0.00047676065731409401
0.00045773203606432273
0.00043946038793652836
0.00042191571166936594
0.00040506919004557344
0.00038889314338669701
0.00037336098486425985
0.00035844717755684772
0.00034412719318538328
0.00033037747246138579
0.00031717538698559721
0.00030449920263672501
0.00029232804439238626
0.00028064186252658253
0.00026942140013016771
0.00025864816190286025
0.00024830438416729869
0.00023837300605760638
0.00022883764183670820
0.00021968255429847053
0.00021089262921237655
0.00020245335077013999
0.00019435077799518337
0.00018657152207745385
0.00017910272459748213
0.00017193203660500594
0.00016504759851879676
0.00015843802081565752
0.00015209236547776152
0.00014600012816873756
0.00014015122111001664
0.00013453595663009705
0.00012914503136041456
0.00012396951105254984
0.00011900081599247053
0.00011423070698846550
0.00010965127191031467
0.00010525491275813704
0.00010103433324017098
0.00009698252683957410
0.00009309276535107925
0.00008935858786911394
0.00008577379020968467
0.00008233241474903310
0.00007902874066272290
0.00007585727454946165
0.00007281274142456166
0.00006989007606854862
0.00006708441471697410
0.00006439108707804967
0.00006180560866522591
0.00005932367343235764
0.00005694114669956594
0.00005465405835838050
0.00005245859634519064
0.00005035110037245584
0.00004832805590754934
0.00004638608838949298
0.00004452195767423328
0.00004273255269946397
0.00004101488636036229
0.00003936609058793519
0.00003778341162200317
0.00003626420547115764
0.00003480593355233138
0.00003340615850290487
0.00003206254015855531
0.00003077283169031418
0.00002953487589456251
0.00002834660162993181
0.00002720602039532207
0.00002611122304346932
0.00002506037662471806
0.00002405172135586082
0.00002308356770911165
0.00002215429361646970
0.00002126234178492110
0.00002040621711810022
0.00001958448424020880
0.00001879576511815191
0.00001803873677801274
0.00001731212911213704
0.00001661472277324746
0.00001594534715214699
0.00001530287843570791
0.00001468623774197000
0.00001409438932930023
0.00001352633887668258
0.00001298113183232536
0.00001245785182788115
0.00001195561915568395
0.00001147358930650776
0.00001101095156545116
0.00001056692766364559
0.00001014077048357703
0.00000973176281589625
0.00000933921616567857
0.00000896246960617306
0.00000860088867815876
0.00000825386433310067
0.00000792081191836819
0.00000760117020284849
0.00000729440044135233
0.00000699998547627398
0.00000671742887502643
0.00000644625410183305
0.00000618600372251144
0.00000593623864094049
0.00000569653736595198
0.00000546649530743960
0.00000524572410052400
0.00000503385095666030
0.00000483051804061701
0.00000463538187229910
0.00000444811275242707
0.00000426839421112469
0.00000409592247850392
0.00000393040597637308
0.00000377156483022778
0.00000361913040071842
0.00000347284483381889
0.00000333246062895320
0.00000319774022436488
0.00000306845559904331
0.00000294438789054781
0.00000282532702809672
0.00000271107138031363
0.00000260142741704722
0.00000249620938470400
0.00000239523899455611
0.00000229834512350666
0.00000220536352681700
0.00000211613656231854
0.00000203051292565197
0.00000194834739609388
0.00000186950059254903
0.00000179383873930272
0.00000172123344114415
0.00000165156146748697
0.00000158470454512822
0.00000152054915930090
0.00000145898636268933
0.00000139991159208960
0.00000134322449240977
0.00000128882874771716
0.00000123663191905103
0.00000118654528873088
0.00000113848371090066
0.00000109236546806010
0.00000104811213334380
0.00000100564843831866
0.00000096490214607897
0.00000092580392942762
0.00000088828725394010
0.00000085228826571610
0.00000081774568363138
0.00000078460069590998
0.00000075279686084390
0.00000072228001149462
0.00000069299816421697
0.00000066490143085257
0.00000063794193444604
0.00000061207372834300
0.00000058725271853451
0.00000056343658911807
0.00000054058473075045
0.00000051865817197250
0.00000049761951329104
0.00000047743286390741
0.00000045806378098668
0.00000043947921136577
0.00000042164743560278
0.00000040453801427383
0.00000038812173642712
0.00000037237057010815
0.00000035725761487271
0.00000034275705620824
0.00000032884412178695
0.00000031549503947728
0.00000030268699704324
0.00000029039810346391
0.00000027860735180811
0.00000026729458360194
0.00000025644045462927
0.00000024602640210764
0.00000023603461318448
0.00000022644799470064
0.00000021725014417029
0.00000020842532192857
0.00000019995842439988
0.00000019183495844196
0.00000018404101672261
0.00000017656325408745
0.00000016938886487906
0.00000016250556116914
0.00000015590155186724
0.00000014956552267056
0.00000014348661682136
0.00000013765441663917
0.00000013205892579705
0.00000012669055231164
0.00000012154009221860
0.00000011659871390567
0.00000011185794307711
0.00000010730964832395
0.00000010294602727582
0.00000009875959331098
0.00000009474316280195
0.00000009088984287540
0.00000008719301966548
0.00000008364634704076
0.00000008024373578581
0.00000007697934321897
0.00000007384756322890
0.00000007084301671303
0.00000006796054240166
0.00000006519518805224
0.00000006254220199897
0.00000005999702504331
0.00000005755528267177
0.00000005521277758776
0.00000005296548254482
0.00000005080953346918
0.00000004874122285992
0.00000004675699345554
0.00000004485343215630
0.00000004302726419189
0.00000004127534752467
0.00000003959466747892
0.00000003798233158699
0.00000003643556464363
0.00000003495170396012
0.00000003352819481006
0.00000003216258605927
0.00000003085252597214
0.00000002959575818753
0.00000002839011785725
0.00000002723352794059
0.00000002612399564870
0.00000002505960903257
0.00000002403853370906
0.00000002305900971921
0.00000002211934851361
0.00000002121793005966
0.00000002035320006582
0.00000001952366731809
0.00000001872790112424
0.00000001796452886138
0.00000001723223362279
0.00000001652975195989
0.00000001585587171560
0.00000001520942994535
0.00000001458931092222
0.00000001399444422279
0.00000001342380289047
0.00000001287640167320
0.00000001235129533239
0.00000001184757702041
0.00000001136437672370
0.00000001090085976897
0.00000001045622538979
0.00000001002970535135
0.00000000962056263076
0.00000000922809015095
0.00000000885160956572
0.00000000849047009408
0.00000000814404740177
0.00000000781174252810
0.00000000749298085627
0.00000000718721112540
0.00000000689390448263
0.00000000661255357353
0.00000000634267166950
0.00000000608379183046
0.00000000583546610148
0.00000000559726474197
0.00000000536877548618
0.00000000514960283357
0.00000000493936736805
0.00000000473770510476
0.00000000454426686337
0.00000000435871766677
0.00000000418073616416
0.00000000401001407755
0.00000000384625567067
0.00000000368917723944
0.00000000353850662315
0.00000000339398273540
0.00000000325535511414
0.00000000312238348988
0.00000000299483737154
0.00000000287249564896
0.00000000275514621171
0.00000000264258558318
0.00000000253461856970
0.00000000243105792380
0.00000000233172402112
0.00000000223644455055
0.00000000214505421682
0.00000000205739445525
0.00000000197331315803
0.00000000189266441169
0.00000000181530824512
0.00000000174111038791
0.00000000166994203851
0.00000000160167964172
0.00000000153620467529
0.00000000147340344521
0.00000000141316688922
0.00000000135539038841
0.00000000129997358639
0.00000000124682021587
0.00000000119583793225
0.00000000114693815397
0.00000000110003590938
0.00000000105504968981
0.00000000101190130860
0.00000000097051576591
0.00000000093082111896
0.00000000089274835758
0.00000000085623128485
0.00000000082120640252
0.00000000078761280114
0.00000000075539205465
0.00000000072448811927
0.00000000069484723644
0.00000000066641783981
0.00000000063915046589
0.00000000061299766846
0.00000000058791393635
0.00000000056385561466
0.00000000054078082911
0.00000000051864941350
0.00000000049742284014
0.00000000047706415306
0.00000000045753790400
0.00000000043881009095
0.00000000042084809923
0.00000000040362064494
0.00000000038709772072
0.00000000037125054375
0.00000000035605150580
0.00000000034147412537
0.00000000032749300177
0.00000000031408377105
0.00000000030122306372
0.00000000028888846424
0.00000000027705847209
0.00000000026571246446
0.00000000025483066052
0.00000000024439408699
0.00000000023438454529
0.00000000022478457989
0.00000000021557744804
0.00000000020674709069
0.00000000019827810459
0.00000000019015571553
0.00000000018236575271
0.00000000017489462412
0.00000000016772929289
0.00000000016085725468
0.00000000015426651593
0.00000000014794557305
0.00000000014188339236
0.00000000013606939099
0.00000000013049341843
0.00000000012514573891
0.00000000012001701446
0.00000000011509828870
0.00000000011038097120
0.00000000010585682264
0.00000000010151794037
0.00000000009735674475
0.00000000009336596593
0.00000000008953863118
0.00000000008586805281
0.00000000008234781647
0.00000000007897177006
0.00000000007573401294
0.00000000007262888573
0.00000000006965096043
0.00000000006679503096
0.00000000006405610410
0.00000000006142939082
0.00000000005891029789
0.00000000005649441996
0.00000000005417753178
0.00000000005195558095
0.00000000004982468078
0.00000000004778110355
0.00000000004582127401
0.00000000004394176317
0.00000000004213928229
0.00000000004041067716
0.00000000003875292262
0.00000000003716311725
0.00000000003563847837
0.00000000003417633712
0.00000000003277413386
0.00000000003142941367
0.00000000003013982208
0.00000000002890310100
0.00000000002771708472
0.00000000002657969617
0.00000000002548894327
0.00000000002444291551
0.00000000002343978054
0.00000000002247778103
0.00000000002155523158
0.00000000002067051578
0.00000000001982208339
0.00000000001900844763
0.00000000001822818261
0.00000000001747992078
0.00000000001676235063
0.00000000001607421430
0.00000000001541430547
0.00000000001478146721
0.00000000001417458996
0.00000000001359260959
0.00000000001303450557
0.00000000001249929915
0.00000000001198605167
0.00000000001149386293
0.00000000001102186957
0.00000000001056924362
0.00000000001013519103
0.00000000000971895025
0.00000000000931979096
0.00000000000893701274
0.00000000000856994386
0.00000000000821794013
0.00000000000788038375
0.00000000000755668222
0.00000000000724626733
0.00000000000694859415
0.00000000000666314009
0.00000000000638940396
0.00000000000612690511
0.00000000000587518261
0.00000000000563379440
0.00000000000540231655
0.00000000000518034249
0.00000000000496748234
0.00000000000476336218
0.00000000000456762343
0.00000000000437992221
0.00000000000419992873
0.00000000000402732672
0.00000000000386181288
0.00000000000370309635
0.00000000000355089820
0.00000000000340495092
0.00000000000326499798
0.00000000000313079336
0.00000000000300210116
0.00000000000287869510
0.00000000000276035823
0.00000000000264688247
0.00000000000253806829
0.00000000000243372433
0.00000000000233366709
0.00000000000223772058
0.00000000000214571606
0.00000000000205749167
0.00000000000197289223
0.00000000000189176890
0.00000000000181397896
0.00000000000173938554
0.00000000000166785738
0.00000000000159926862
0.00000000000153349855
0.00000000000147043142
0.00000000000140995622
0.00000000000135196652
0.00000000000129636023
0.00000000000124303947
0.00000000000119191035
0.00000000000114288287
0.00000000000109587070
0.00000000000105079106
0.00000000000100756455
0.00000000000096611507
0.00000000000092636960
0.00000000000088825815
0.00000000000085171358
0.00000000000081667152
0.00000000000078307024
0.00000000000075085053
0.00000000000071995565
0.00000000000069033113
0.00000000000066192480
0.00000000000063468659
0.00000000000060856849
0.00000000000058352448
0.00000000000055951042
0.00000000000053648398
0.00000000000051440456
0.00000000000049323326
0.00000000000047293273
0.00000000000045346720
0.00000000000043480233
0.00000000000041690522
0.00000000000039974432
0.00000000000038328935
0.00000000000036751129
0.00000000000035238232
0.00000000000033787576
0.00000000000032396601
0.00000000000031062854
0.00000000000029783981
0.00000000000028557728
0.00000000000027381929
0.00000000000026254511
0.00000000000025173484
0.00000000000024136940
0.00000000000023143050
0.00000000000022190061
0.00000000000021276289
0.00000000000020400123
0.00000000000019560016
0.00000000000018754483
0.00000000000017982105
0.00000000000017241516
0.00000000000016531410
0.00000000000015850532
0.00000000000015197680
0.00000000000014571702
0.00000000000013971491
0.00000000000013395988
0.00000000000012844177
0.00000000000012315082
0.00000000000011807769
0.00000000000011321342
0.00000000000010854942
0.00000000000010407745
0.00000000000009978960
0.00000000000009567829
0.00000000000009173627
0.00000000000008795657
0.00000000000008433251
0.00000000000008085768
0.00000000000007752594
0.00000000000007433141
0.00000000000007126844
0.00000000000006833160
0.00000000000006551572
0.00000000000006281581
0.00000000000006022709
0.00000000000005774500
0.00000000000005536515
0.00000000000005308331
0.00000000000005089547
0.00000000000004879775
0.00000000000004678644
0.00000000000004485798
0.00000000000004300897
0.00000000000004123612
0.00000000000003953631
0.00000000000003790653
0.00000000000003634390
0.00000000000003484565
0.00000000000003340912
0.00000000000003203179
0.00000000000003071120
0.00000000000002944503
0.00000000000002823103
0.00000000000002706706
0.00000000000002595105
0.00000000000002488102
0.00000000000002385510
0.00000000000002287145
0.00000000000002192834
0.00000000000002102410
0.00000000000002015712
0.00000000000001932588
0.00000000000001852890
0.00000000000001776476
0.00000000000001703213
0.00000000000001632969
0.00000000000001565620
0.00000000000001501048
0.00000000000001439137
