# Supplementary material
Source: publisher figshare collection journal article supplement (https://rs.figshare.com/ndownloader/files/37464464)
Supplement: Supplementary file 2 [file 37464464 › Ordered_Nanoporous_Metals_SI/ONMs_EAM_Potential_files/EAM_Ni.Sheng.lammps.eam]

# EAM potentials generated by H.W.Sheng (hsheng@gmu.edu) on Tue May 11 08:50:34 2010
#
##
   2  Ni1 Ni2
 1001   1.0000000000000000e-03 1001   6.3000000000000000e-03   6.2999999999999998e+00 # nrho drho nr dr cutoff
   28 58.69  0 dummy #Atomic_number  atomic_mass (g/cm^3) lattice_constant lattice_type
 -1.0373300155080382e-01 -1.3304658462438035e-01 -1.6224752850022153e-01 -1.9133584075704588e-01 -2.2031153398613446e-01
 -2.4917462575711657e-01 -2.7792513858375578e-01 -3.0656309988973551e-01 -3.3508854197444493e-01 -3.6350150197876507e-01
 -3.9180202185085422e-01 -4.1999014831193393e-01 -4.4806593282207491e-01 -4.7602943154598276e-01 -5.0388070531878393e-01
 -5.3161981961181137e-01 -5.5924684449839035e-01 -5.8676185461962460e-01 -6.1416492915018162e-01 -6.4145615176407911e-01
 -6.6863561060047028e-01 -6.9570339822942984e-01 -7.2265961161773995e-01 -7.4950435209467614e-01 -7.7623772531779256e-01
 -8.0285984123870835e-01 -8.2937081406889357e-01 -8.5577076224545445e-01 -8.8205980839691978e-01 -9.0823807930902622e-01
 -9.3430570589050466e-01 -9.6026282313886580e-01 -9.8610957010618550e-01 -1.0118460898648920e+00 -1.0374725294735498e+00
 -1.0629890399426469e+00 -1.0883957762003806e+00 -1.1136928970584425e+00 -1.1388805651778049e+00 -1.1639589470345066e+00
 -1.1889282128854386e+00 -1.2137885367341297e+00 -1.2385400962965329e+00 -1.2631830729668110e+00 -1.2877176517831219e+00
 -1.3121440213934057e+00 -1.3364623740211683e+00 -1.3606729054312701e+00 -1.3847758148957092e+00 -1.4087713051594093e+00
 -1.4326595824060038e+00 -1.4564408562236231e+00 -1.4801153395706790e+00 -1.5036832487416523e+00 -1.5271448033328763e+00
 -1.5505002262083254e+00 -1.5737497434653980e+00 -1.5968935844007051e+00 -1.6199319814758535e+00 -1.6428651702832342e+00
 -1.6656933895118060e+00 -1.6884168809128828e+00 -1.7110358892659188e+00 -1.7335506623442942e+00 -1.7559614508811017e+00
 -1.7782685085349319e+00 -1.8004720918556580e+00 -1.8225724602502247e+00 -1.8445698759484304e+00 -1.8664646039687152e+00
 -1.8882569120839465e+00 -1.9099470707872044e+00 -1.9315353532575676e+00 -1.9530220353258991e+00 -1.9744073954406327e+00
 -1.9956917146335584e+00 -2.0168752764856075e+00 -2.0379583670926391e+00 -2.0589412750312270e+00 -2.0798242913244436e+00
 -2.1006077094076465e+00 -2.1212918250942652e+00 -2.1418769365415846e+00 -2.1623633442165349e+00 -2.1827513508614720e+00
 -2.2030412614599686e+00 -2.2232333832025954e+00 -2.2433280254527115e+00 -2.2633254997122467e+00 -2.2832261195874879e+00
 -2.3030302007548666e+00 -2.3227380609267438e+00 -2.3423500198171943e+00 -2.3618663991077957e+00 -2.3812875224134111e+00
 -2.4006137152479772e+00 -2.4198453049902882e+00 -2.4389826208497833e+00 -2.4580259938323321e+00 -2.4769757567060200e+00
 -2.4958322439669334e+00 -2.5145957918049477e+00 -2.5332667380695102e+00 -2.5518454222354290e+00 -2.5703321853686565e+00
 -2.5887273700920765e+00 -2.6070313205512883e+00 -2.6252443823803957e+00 -2.6433669026677897e+00 -2.6613992299219356e+00
 -2.6793417140371587e+00 -2.6971947062594315e+00 -2.7149585591521563e+00 -2.7326336265619542e+00 -2.7502202635844495e+00
 -2.7677188265300550e+00 -2.7851296728897590e+00 -2.8024531613009116e+00 -2.8196896515130079e+00 -2.8368395043534766e+00
 -2.8539030816934647e+00 -2.8708807464136221e+00 -2.8877728623698906e+00 -2.9045797943592868e+00 -2.9213019080856886e+00
 -2.9379395701256219e+00 -2.9544931478940457e+00 -2.9709630096101391e+00 -2.9873495242630841e+00 -3.0036530615778556e+00
 -3.0198739919810031e+00 -3.0360126865664401e+00 -3.0520695170612275e+00 -3.0680448557913609e+00 -3.0839390756475549e+00
 -3.0997525500510306e+00 -3.1154856529193014e+00 -3.1311387586319555e+00 -3.1467122419964468e+00 -3.1622064782138772e+00
 -3.1776218428447831e+00 -3.1929587117749234e+00 -3.2082174611810603e+00 -3.2233984674967520e+00 -3.2385021073781326e+00
 -3.2535287576697001e+00 -3.2684787953701031e+00 -3.2833525975979256e+00 -3.2981505415574737e+00 -3.3128730045045596e+00
 -3.3275203637122894e+00 -3.3420929964368482e+00 -3.3565912798832849e+00 -3.3710155911713002e+00 -3.3853663073010307e+00
 -3.3996438051188362e+00 -3.4138484612830822e+00 -3.4279806522299299e+00 -3.4420407541391209e+00 -3.4560291428997605e+00
 -3.4699461940761060e+00 -3.4837922828733530e+00 -3.4975677841034196e+00 -3.5112730721507313e+00 -3.5249085209380095e+00
 -3.5384745038920569e+00 -3.5519713939095410e+00 -3.5653995633227824e+00 -3.5787593838655400e+00 -3.5920512266387954e+00
 -3.6052754620765404e+00 -3.6184324599115620e+00 -3.6315225891412295e+00 -3.6445462179932782e+00 -3.6575037138915976e+00
 -3.6703954434220130e+00 -3.6832217722980789e+00 -3.6959830653268564e+00 -3.7086796863747038e+00 -3.7213119983330634e+00
 -3.7338803630842436e+00 -3.7463851414672051e+00 -3.7588266932433512e+00 -3.7712053770623095e+00 -3.7835215504277184e+00
 -3.7957755696630135e+00 -3.8079677898772131e+00 -3.8200985649307042e+00 -3.8321682474010301e+00 -3.8441771885486702e+00
 -3.8561257382828344e+00 -3.8680142451272426e+00 -3.8798430561859125e+00 -3.8916125171089453e+00 -3.9033229720583145e+00
 -3.9149747636736438e+00 -3.9265682330380027e+00 -3.9381037196436846e+00 -3.9495815613579972e+00 -3.9610020943890469e+00
 -3.9723656532515226e+00 -3.9836725707328196e+00 -3.9949231778678285e+00 -4.0061178039357443e+00 -4.0172567764655502e+00
 -4.0283404212418317e+00 -4.0393690623105920e+00 -4.0503430219850678e+00 -4.0612626208515445e+00 -4.0721281777751734e+00
 -4.0829400099057853e+00 -4.0936984326837056e+00 -4.1044037598455709e+00 -4.1150563034301459e+00 -4.1256563737841354e+00
 -4.1362042795680019e+00 -4.1467003277617822e+00 -4.1571448236709010e+00 -4.1675380709319851e+00 -4.1778803715186834e+00
 -4.1881720257474795e+00 -4.1984133322835051e+00 -4.2086045881463603e+00 -4.2187460887159256e+00 -4.2288381277381788e+00
 -4.2388809973310089e+00 -4.2488749879900345e+00 -4.2588203885944163e+00 -4.2687174864126742e+00 -4.2785665671085038e+00
 -4.2883679147465887e+00 -4.2981218117984188e+00 -4.3078285391481037e+00 -4.3174883760981917e+00 -4.3271016003754807e+00
 -4.3366684881368371e+00 -4.3461893139750103e+00 -4.3556643509244459e+00 -4.3650938704671072e+00 -4.3744781425382824e+00
 -4.3838174355324080e+00 -4.3931120163088790e+00 -4.4023621501978658e+00 -4.4115681010061323e+00 -4.4207301310228475e+00
 -4.4298485010254014e+00 -4.4389234702852249e+00 -4.4479552965735998e+00 -4.4569442361674776e+00 -4.4658905438552932e+00
 -4.4747944729427811e+00 -4.4836562752587934e+00 -4.4924762011611099e+00 -4.5012544995422585e+00 -4.5099914178353284e+00
 -4.5186872020197848e+00 -4.5273420966272866e+00 -4.5359563447475013e+00 -4.5445301880339191e+00 -4.5530638667096701e+00
 -4.5615576195733389e+00 -4.5700116840047791e+00 -4.5784262959709316e+00 -4.5868016900316375e+00 -4.5951380993454549e+00
 -4.6034357556754735e+00 -4.6116948893951308e+00 -4.6199157294940276e+00 -4.6280985035837432e+00 -4.6362434379036515e+00
 -4.6443507573267340e+00 -4.6524206853654002e+00 -4.6604534441772980e+00 -4.6684492545711311e+00 -4.6764083360124769e+00
 -4.6843309066295982e+00 -4.6922171832192596e+00 -4.7000673812525458e+00 -4.7078817148806742e+00 -4.7156603969408097e+00
 -4.7234036389618836e+00 -4.7311116511704068e+00 -4.7387846424962854e+00 -4.7464228205786361e+00 -4.7540263917716024e+00
 -4.7615955611501697e+00 -4.7691305325159803e+00 -4.7766315084031516e+00 -4.7840986900840878e+00 -4.7915322775752953e+00
 -4.7989324696432032e+00 -4.8062994638099727e+00 -4.8136334563593186e+00 -4.8209346423423174e+00 -4.8282032155832315e+00
 -4.8354393686853170e+00 -4.8426432930366428e+00 -4.8498151788159074e+00 -4.8569552149982496e+00 -4.8640635893610709e+00
 -4.8711404884898437e+00 -4.8781860977839315e+00 -4.8852006014624045e+00 -4.8921841825698520e+00 -4.8991370229821998e+00
 -4.9060593034125262e+00 -4.9129512034168750e+00 -4.9198129014000758e+00 -4.9266445746215544e+00 -4.9334463992011504e+00
 -4.9402185501249338e+00 -4.9469612012510176e+00 -4.9536745253153764e+00 -4.9603586939376605e+00 -4.9670138776270107e+00
 -4.9736402457878750e+00 -4.9802379667258245e+00 -4.9868072076533654e+00 -4.9933481346957604e+00 -4.9998609128968381e+00
 -5.0063457062248133e+00 -5.0128026775780992e+00 -5.0192319887911232e+00 -5.0256338006401471e+00 -5.0320082728490760e+00
 -5.0383555640952764e+00 -5.0446758320153924e+00 -5.0509692332111609e+00 -5.0572359232552291e+00 -5.0634760566969632e+00
 -5.0696897870682731e+00 -5.0758772668894192e+00 -5.0820386476748363e+00 -5.0881740799389412e+00 -5.0942837132019525e+00
 -5.1003676959957076e+00 -5.1064261758694736e+00 -5.1124592993957654e+00 -5.1184672121761619e+00 -5.1244500588471205e+00
 -5.1304079830857914e+00 -5.1363411276158359e+00 -5.1422496342132398e+00 -5.1481336437121268e+00 -5.1539932960105821e+00
 -5.1598287300764580e+00 -5.1656400839531944e+00 -5.1714274947656351e+00 -5.1771910987258405e+00 -5.1829310311389056e+00
 -5.1886474264087745e+00 -5.1943404180440531e+00 -5.2000101386638304e+00 -5.2056567200034900e+00 -5.2112802929205255e+00
 -5.2168809874003577e+00 -5.2224589325621489e+00 -5.2280142566646184e+00 -5.2335470871118606e+00 -5.2390575504591554e+00
 -5.2445457724187881e+00 -5.2500118778658633e+00 -5.2554559908441201e+00 -5.2608782345717486e+00 -5.2662787314472030e+00
 -5.2716576030550222e+00 -5.2770149701716376e+00 -5.2823509527711963e+00 -5.2876656700313731e+00 -5.2929592403391830e+00
 -5.2982317812968045e+00 -5.3034834097273844e+00 -5.3087142416808666e+00 -5.3139243924397928e+00 -5.3191139765251316e+00
 -5.3242831077020849e+00 -5.3294318989859057e+00 -5.3345604626477154e+00 -5.3396689102203192e+00 -5.3447573525040184e+00
 -5.3498258995724299e+00 -5.3548746607782984e+00 -5.3599037447593139e+00 -5.3649132594439273e+00 -5.3699033120571622e+00
 -5.3748740091264384e+00 -5.3798254564873780e+00 -5.3847577592896272e+00 -5.3896710220026707e+00 -5.3945653484216436e+00
 -5.3994408416731519e+00 -5.4042976042210853e+00 -5.4091357378724325e+00 -5.4139553437830985e+00 -5.4187565224637178e+00
 -5.4235393737854718e+00 -5.4283039969859015e+00 -5.4330504906747290e+00 -5.4377789528396656e+00 -5.4424894808522311e+00
 -5.4471821714735693e+00 -5.4518571208602529e+00 -5.4565144245697539e+00 -5.4611541775651062e+00 -5.4657764742192239e+00
 -5.4703814083192235e+00 -5.4749690730707306e+00 -5.4795395611022037e+00 -5.4840929644692409e+00 -5.4886293746588999e+00
 -5.4931488825940100e+00 -5.4976515786374884e+00 -5.5021375525966523e+00 -5.5066068937275396e+00 -5.5110596907392155e+00
 -5.5154960317980937e+00 -5.5199160045322486e+00 -5.5243196960357297e+00 -5.5287071928728766e+00 -5.5330785810826359e+00
 -5.5374339461828725e+00 -5.5417733731746859e+00 -5.5460969465467249e+00 -5.5504047502795046e+00 -5.5546968678497164e+00
 -5.5589733822345462e+00 -5.5632343759159877e+00 -5.5674799308851597e+00 -5.5717101286466164e+00 -5.5759250502226658e+00
 -5.5801247761576835e+00 -5.5843093865224267e+00 -5.5884789609183487e+00 -5.5926335784819159e+00 -5.5967733178889194e+00
 -5.6008982573587929e+00 -5.6050084746589253e+00 -5.6091040471089739e+00 -5.6131850515851855e+00 -5.6172515645247030e+00
 -5.6213036619298871e+00 -5.6253414193726243e+00 -5.6293649119986489e+00 -5.6333742145318526e+00 -5.6373694012786011e+00
 -5.6413505461320490e+00 -5.6453177225764515e+00 -5.6492710036914859e+00 -5.6532104621565589e+00 -5.6571361702551259e+00
 -5.6610481998790041e+00 -5.6649466225326881e+00 -5.6688315093376644e+00 -5.6727029310367243e+00 -5.6765609579982810e+00
 -5.6804056602206856e+00 -5.6842371073365356e+00 -5.6880553686169986e+00 -5.6918605129761186e+00 -5.6956526089751360e+00
 -5.6994317248268009e+00 -5.7031979283996863e+00 -5.7069512872225063e+00 -5.7106918684884285e+00 -5.7144197390593865e+00
 -5.7181349654704006e+00 -5.7218376139338867e+00 -5.7255277503439750e+00 -5.7292054402808219e+00 -5.7328707490149267e+00
 -5.7365237415114469e+00 -5.7401644824345084e+00 -5.7437930361515281e+00 -5.7474094667375200e+00 -5.7510138379794160e+00
 -5.7546062133803790e+00 -5.7581866561641162e+00 -5.7617552292791956e+00 -5.7653119954033603e+00 -5.7688570169478437e+00
 -5.7723903560616812e+00 -5.7759120746360306e+00 -5.7794222343084805e+00 -5.7829208964673695e+00 -5.7864081222561010e+00
 -5.7898839725774538e+00 -5.7933485080979024e+00 -5.7968017892519255e+00 -5.8002438762463262e+00 -5.8036748290645459e+00
 -5.8070947074709762e+00 -5.8105035710152739e+00 -5.8139014790366810e+00 -5.8172884906683313e+00 -5.8206646648415719e+00
 -5.8240300602902755e+00 -5.8273847355551531e+00 -5.8307287489880739e+00 -5.8340621587563737e+00 -5.8373850228471742e+00
 -5.8406973990716962e+00 -5.8439993450695749e+00 -5.8472909183131732e+00 -5.8505721761118989e+00 -5.8538431756165172e+00
 -5.8571039738234658e+00 -5.8603546275791709e+00 -5.8635951935843602e+00 -5.8668257283983802e+00 -5.8700462884435067e+00
 -5.8732569300092647e+00 -5.8764577092567398e+00 -5.8796486822228928e+00 -5.8828299048248773e+00 -5.8860014328643508e+00
 -5.8891633220317905e+00 -5.8923156279108113e+00 -5.8954584059824766e+00 -5.8985917116296136e+00 -5.9017156001411308e+00
 -5.9048301267163277e+00 -5.9079353464692161e+00 -5.9110313144328295e+00 -5.9141180855635387e+00 -5.9171957147453700e+00
 -5.9202642567943160e+00 -5.9233237664626515e+00 -5.9263742984432497e+00 -5.9294159073738957e+00 -5.9324486478415990e+00
 -5.9354725743869148e+00 -5.9384877415082507e+00 -5.9414942036661866e+00 -5.9444920152877891e+00 -5.9474812307709248e+00
 -5.9504619044885736e+00 -5.9534340907931487e+00 -5.9563978440208043e+00 -5.9593532184957567e+00 -5.9623002685345963e+00
 -5.9652390484506004e+00 -5.9681696125580519e+00 -5.9710920151765512e+00 -5.9740063106353318e+00 -5.9769125532775753e+00
 -5.9798107974647259e+00 -5.9827010975808053e+00 -5.9855835080367275e+00 -5.9884580832746117e+00 -5.9913248777721009e+00
 -5.9941839460466735e+00 -5.9970353426599585e+00 -5.9998791222220511e+00 -6.0027153393958281e+00 -6.0055440489012586e+00
 -6.0083653055197255e+00 -6.0111791640983343e+00 -6.0139856795542297e+00 -6.0167849068789110e+00 -6.0195769011425488e+00
 -6.0223617174982937e+00 -6.0251394111865961e+00 -6.0279100375395220e+00 -6.0306736519850617e+00 -6.0334303100514513e+00
 -6.0361800673714816e+00 -6.0389229796868173e+00 -6.0416591028523108e+00 -6.0443884928403131e+00 -6.0471112057449954e+00
 -6.0498272977866572e+00 -6.0525368253160456e+00 -6.0552398448186668e+00 -6.0579364129191040e+00 -6.0606265863853288e+00
 -6.0633104221330196e+00 -6.0659879772298728e+00 -6.0686593088999192e+00 -6.0713244745278407e+00 -6.0739835316632806e+00
 -6.0766365380251628e+00 -6.0792835515060020e+00 -6.0819246301762222e+00 -6.0845598322884724e+00 -6.0871892162819350e+00
 -6.0898128407866476e+00 -6.0924307646278146e+00 -6.0950430468301207e+00 -6.0976497466220492e+00 -6.1002509234401918e+00
 -6.1028466369335685e+00 -6.1054369469679397e+00 -6.1080219136301208e+00 -6.1106015972322973e+00 -6.1131760583163404e+00
 -6.1157453576581196e+00 -6.1183095562718197e+00 -6.1208687154142556e+00 -6.1234228965891848e+00 -6.1259721615516227e+00
 -6.1285165723121615e+00 -6.1310561911410000e+00 -6.1335910805647575e+00 -6.1361213033449351e+00 -6.1386469224491504e+00
 -6.1411680010220930e+00 -6.1436846023564824e+00 -6.1461967898640237e+00 -6.1487046270463663e+00 -6.1512081774660565e+00
 -6.1537075047174987e+00 -6.1562026723979093e+00 -6.1586937440782732e+00 -6.1611807832743022e+00 -6.1636638534173915e+00
 -6.1661430178255721e+00 -6.1686183396744756e+00 -6.1710898819682818e+00 -6.1735577075106827e+00 -6.1760218788758348e+00
 -6.1784824583793165e+00 -6.1809395080490868e+00 -6.1833930895964384e+00 -6.1858432643869588e+00 -6.1882900934114824e+00
 -6.1907336372570505e+00 -6.1931739560778656e+00 -6.1956111095662507e+00 -6.1980451569236017e+00 -6.2004761568313498e+00
 -6.2029041674219130e+00 -6.2053292462496561e+00 -6.2077514502618438e+00 -6.2101708357696026e+00 -6.2125874584188718e+00
 -6.2150013731613649e+00 -6.2174126342255231e+00 -6.2198212950874714e+00 -6.2222274084419791e+00 -6.2246310261734132e+00
 -6.2270321993266959e+00 -6.2294309780782617e+00 -6.2318274117070134e+00 -6.2342215485652783e+00 -6.2366134360497663e+00
 -6.2390031205725256e+00 -6.2413906475319001e+00 -6.2437760612834845e+00 -6.2461594051110811e+00 -6.2485407211976600e+00
 -6.2509200505963101e+00 -6.2532974332012010e+00 -6.2556729077185347e+00 -6.2580465116375068e+00 -6.2604182812012601e+00
 -6.2627882513778435e+00 -6.2651564558311668e+00 -6.2675229268919557e+00 -6.2698876955287153e+00 -6.2722507913186778e+00
 -6.2746122424187654e+00 -6.2769720755365448e+00 -6.2793303159011860e+00 -6.2816869872344121e+00 -6.2840421117214662e+00
 -6.2863957099820595e+00 -6.2887478010413327e+00 -6.2910984023008085e+00 -6.2934475295093550e+00 -6.2957951967341339e+00
 -6.2981414163315641e+00 -6.3004861989182750e+00 -6.3028295533420637e+00 -6.3051714866528519e+00 -6.3075120040736410e+00
 -6.3098511089714719e+00 -6.3121888028283788e+00 -6.3145250852123471e+00 -6.3168599537482706e+00 -6.3191934040889066e+00
 -6.3215254298858330e+00 -6.3238560227604053e+00 -6.3261851722747142e+00 -6.3285128659025407e+00 -6.3308390890003130e+00
 -6.3331638247780635e+00 -6.3354870542703843e+00 -6.3378087563073882e+00 -6.3401289074856582e+00 -6.3424474821392094e+00
 -6.3447644523104456e+00 -6.3470797877211123e+00 -6.3493934557432574e+00 -6.3517054213701858e+00 -6.3540156471874143e+00
 -6.3563240933436331e+00 -6.3586307175216579e+00 -6.3609354749093878e+00 -6.3632383181707635e+00 -6.3655391974167221e+00
 -6.3678380601761555e+00 -6.3701348513668643e+00 -6.3724295132665176e+00 -6.3747219854836068e+00 -6.3770122049284055e+00
 -6.3793001057839218e+00 -6.3815856194768585e+00 -6.3838686746485696e+00 -6.3861491971260156e+00 -6.3884271098927181e+00
 -6.3907023330597230e+00 -6.3929747838365492e+00 -6.3952443765021512e+00 -6.3975110223758724e+00 -6.3997746297884035e+00
 -6.4020351040527395e+00 -6.4042923474351330e+00 -6.4065462591260562e+00 -6.4087967352111512e+00 -6.4110436686421934e+00
 -6.4132869492080422e+00 -6.4155264635056009e+00 -6.4177620949107741e+00 -6.4199937235494211e+00 -6.4222212262683147e+00
 -6.4244444766060971e+00 -6.4266633447642389e+00 -6.4288776975779909e+00 -6.4310873984873460e+00 -6.4332923075079922e+00
 -6.4354922812022703e+00 -6.4376871726501319e+00 -6.4398768314200936e+00 -6.4420611035401949e+00 -6.4442398314689555e+00
 -6.4464128540663319e+00 -6.4485800065646712e+00 -6.4507411205396723e+00 -6.4528960238813395e+00 -6.4550445407649386e+00
 -6.4571864916219575e+00 -6.4593216931110558e+00 -6.4614499580890303e+00 -6.4635710955817647e+00 -6.4656849107551881e+00
 -6.4677912048862352e+00 -6.4698897753337965e+00 -6.4719804155096803e+00 -6.4740629148495659e+00 -6.4761370587839640e+00
 -6.4782026287091696e+00 -6.4802594019582207e+00 -6.4823071517718525e+00 -6.4843456472694596e+00 -6.4863746534200457e+00
 -6.4883939310131842e+00 -6.4904032366299758e+00 -6.4924023226140006e+00 -6.4943909370422812e+00 -6.4963688236962334e+00
 -6.4983357220326248e+00 -6.5002913671545333e+00 -6.5022354897823016e+00 -6.5041678162244949e+00 -6.5060880683488573e+00
 -6.5079959635532667e+00 -6.5098912147366947e+00 -6.5117735302701618e+00 -6.5136426139676926e+00 -6.5154981650572754e+00
 -6.5173398781518141e+00 -6.5191674432200921e+00 -6.5209805455577206e+00 -6.5227788657581014e+00 -6.5245620796833821e+00
 -6.5263298584354104e+00 -6.5280818683266935e+00 -6.5298177708513538e+00 -6.5315372226560848e+00 -6.5332398755111099e+00
 -6.5349253762811346e+00 -6.5365933668963097e+00 -6.5382434843231803e+00 -6.5398753605356506e+00 -6.5414886224859341e+00
 -6.5430828920755122e+00 -6.5446577861260922e+00 -6.5462129163505631e+00 -6.5477478893239507e+00 -6.5492623064543771e+00
 -6.5507557639540144e+00 -6.5522278528100451e+00 -6.5536781587556137e+00 -6.5551062622407867e+00 -6.5565117384035112e+00
 -6.5578941570405656e+00 -6.5592530825785209e+00 -6.5605880740446967e+00 -6.5618986850381162e+00 -6.5631844637004644e+00
 -6.5644449526870439e+00 -6.5656796891386291e+00 -6.5668882046766743e+00 -6.5680700254577857e+00 -6.5692246722515542e+00
 -6.5703516605192807e+00 -6.5714505004926975e+00 -6.5725206972527026e+00 -6.5735617508080768e+00 -6.5745731561742158e+00
 -6.5755544034518527e+00 -6.5765049779057856e+00 -6.5774243600436044e+00 -6.5783120256944141e+00 -6.5791674460875624e+00
 -6.5799900879313666e+00 -6.5807794134918352e+00 -6.5815348806714011e+00 -6.5822559430876408e+00 -6.5829420501520044e+00
 -6.5835926471485378e+00 -6.5842071753126135e+00 -6.5847850719096535e+00 -6.5853257703138546e+00 -6.5858287000869167e+00
 -6.5862932870567663e+00 -6.5867189533962849e+00 -6.5871051177020341e+00 -6.5874511950729788e+00 -6.5877565971892178e+00
 -6.5880207323907074e+00 -6.5882430057559853e+00 -6.5884228191809004e+00 -6.5885595714573375e+00 -6.5886526583519416e+00
 -6.5887014726848445e+00 -6.5887054044083921e+00 -6.5886638406858697e+00 -6.5885761659702275e+00 -6.5884417620828071e+00
 -6.5882600082920648e+00 -6.5880302813923031e+00 -6.5877519557823909e+00 -6.5874244035444933e+00 -6.5870469945227965e+00
 -6.5866190964022309e+00 -6.5861400747872034e+00 -6.5856092932803163e+00 -6.5850261135610975e+00 -6.5843898954647253e+00
 -6.5836999970607550e+00 -6.5829557747318441e+00 -6.5821565832524769e+00 -6.5813017758676944e+00 -6.5803907043718164e+00
 -6.5794227191871686e+00 -6.5783971694428098e+00 -6.5773134030532558e+00 -6.5761707667972065e+00 -6.5749686063962729e+00
 -6.5737062665937005e+00 -6.5723830912330978e+00 -6.5709984233371586e+00 -6.5695516051863940e+00 -6.5680419783978516e+00
 -6.5664688840038465e+00 -6.5648316625306853e+00 -6.5631296540773896e+00 -6.5613621983944279e+00 -6.5595286349624358e+00
 -6.5576283030709446e+00 -6.5556605418971072e+00 -6.5536246905844235e+00 -6.5515200883214666e+00 -6.5493460744206082e+00
 -6.5471019883967463e+00 -6.5447871700460274e+00 -6.5424009595245787e+00 -6.5399426974272252e+00 -6.5374117248662253e+00
 -6.5348073835499907e+00 -6.5321290158618117e+00 -6.5293759649385885e+00 -6.5265475747495509e+00 -6.5236431901749894e+00
 -6.5206621570849777e+00 -6.5176038224181001e+00 -6.5144675342601781e+00 -6.5112526419229946e+00 -6.5079584960230203e+00
 -6.5045844485601414e+00 -6.5011298529963826e+00 -6.4975940643346366e+00 -6.4939764391973860e+00 -6.4902763359054330e+00
 -6.4864931145566231e+00 -6.4826261371045701e+00 -6.4786747674373872e+00 -6.4746383714564057e+00 -6.4705163171549058e+00
 -6.4663079746968428e+00 -6.4620127164955692e+00 -6.4576299172925635e+00 -6.4531589542361569e+00 -6.4485992069602576e+00
 -6.4439500576630753e+00 -6.4392108911858514e+00 -6.4343810950915818e+00 -6.4294600597437412e+00 -6.4244471783850159e+00
 -6.4193418472160211e+00 -6.4141434654740337e+00 -6.4088514355117123e+00 -6.4034651628758308e+00 -6.3979840563859964e+00
 -6.3924075282133810e+00 -6.3867349939594433e+00 -6.3809658727346577e+00 -6.3750995872372398e+00 -6.3691355638318718e+00
 -6.3630732326284258e+00 -6.3569120275606963e+00 -6.3506513864651186e+00 -6.3442907511594999e+00 -6.3378295675217444e+00
 -6.3312672855685763e+00 -6.3246033595342706e+00 -6.3178372479493730e+00 -6.3109684137194328e+00 -6.3039963242037231e+00
 -6.2969204512939694e+00 -6.2897402714930744e+00 -6.2824552659938471e+00 -6.2750649207577220e+00 -6.2675687265934927e+00
 -6.2599661792360344e+00 -6.2522567794250268e+00 -6.2444400329836860e+00 -6.2365154508974872e+00 -6.2284825493928899e+00
 -6.2203408500160657e+00 -6.2120898797116224e+00 -6.2037291709013331e+00 -6.1952582615628584e+00 -6.1866766953084742e+00
 -6.1779840214637973e+00 -6.1691797951465128e+00 -6.1602635773450967e+00 -6.1512349349975457e+00 -6.1420934410701014e+00
 -6.1328386746359733e+00 -6.1234702209540721e+00 -6.1139876715477266e+00 -6.1043906242834174e+00 -6.0946786834494988e+00
 -6.0848514598349244e+00 -6.0749085708079757e+00 -6.0648496403949865e+00 -6.0546742993590676e+00 -6.0443821852788364e+00
 -6.0339729426271367e+00 -6.0234462228497723e+00 -6.0128016844442280e+00 -6.0020389930383944e+00 -5.9911578214692991e+00
 -5.9801578498618291e+00 -5.9690387657074542e+00 -5.9578002639429606e+00 -5.9464420470291692e+00 -5.9349638250296648e+00
 -5.9233653156895230e+00 -5.9116462445140341e+00 -5.8998063448474296e+00 -5.8878453579516110e+00 -5.8757630330848691e+00
 -5.8635591275806176e+00 -5.8512334069261138e+00 -5.8387856448411863e+00 -5.8262156233569611e+00 -5.8135231328945878e+00
 -5.8007079723439636e+00 -5.7877699491424632e+00 -5.7747088793536605e+00 -5.7615245877460550e+00 -5.7482169078718020e+00
 -5.7347856821454339e+00 -5.7212307619225893e+00 -5.7075520075787347e+00 -5.6937492885878953e+00 -5.6798224836013782e+00
 -5.6657714805264998e+00 -5.6515961766053096e+00 -5.6372964784933188e+00 -5.6228723023382239e+00 -5.6083235738586348e+00
 -5.5936502284227982e+00 -5.5788522111273267e+00 -5.5639294768759200e+00 -5.5488819904580993e+00 -5.5337097266279205e+00
 -5.5184126701827161e+00
  1.0000000000000000e+00  9.9999911120357854e-01  9.9999935313800281e-01  1.0000007536175852e+00  1.0000033849595378e+00
  1.0000073862353966e+00  1.0000129846358872e+00  1.0000205015249439e+00  1.0000303287615124e+00  1.0000428961228554e+00
  1.0000586385139318e+00  1.0000779645541698e+00  1.0001012415831729e+00  1.0001288051831130e+00  1.0001609742218731e+00
  1.0001980659700298e+00  1.0002404101796367e+00  1.0002883543681802e+00  1.0003422589705075e+00  1.0004024907972455e+00
  1.0004694164860879e+00  1.0005433966568236e+00  1.0006247844034923e+00  1.0007139276463446e+00  1.0008111719540911e+00
  1.0009168633615451e+00  1.0010313507379407e+00  1.0011549861029818e+00  1.0012881235334599e+00  1.0014311179475255e+00
  1.0015843238951474e+00  1.0017480946212700e+00  1.0019227820650582e+00  1.0021087373536726e+00  1.0023063113257658e+00
  1.0025158550491544e+00  1.0027377201804490e+00  1.0029722589128554e+00  1.0032198237574470e+00  1.0034807673177597e+00
  1.0037554420692767e+00  1.0040442002266334e+00  1.0043473937855816e+00  1.0046653746186833e+00  1.0049984945723638e+00
  1.0053471055601770e+00  1.0057115596093584e+00  1.0060922088358433e+00  1.0064894054027209e+00  1.0069035014784509e+00
  1.0073348491978129e+00  1.0077838006467661e+00  1.0082507078755434e+00  1.0087359229166108e+00  1.0092397978026486e+00
  1.0097626845826799e+00  1.0103049353264228e+00  1.0108669021178973e+00  1.0114489370476822e+00  1.0120513922051821e+00
  1.0126746196720837e+00  1.0133189715214017e+00  1.0139847998204623e+00  1.0146724566342364e+00  1.0153822940286625e+00
  1.0161146640732388e+00  1.0168699188410613e+00  1.0176484104074734e+00  1.0184504908486296e+00  1.0192765122400744e+00
  1.0201268266557424e+00  1.0210017861680889e+00  1.0219017428486887e+00  1.0228270487688542e+00  1.0237780560002419e+00
  1.0247551166152224e+00  1.0257585826867701e+00  1.0267888062882014e+00  1.0278461394929073e+00  1.0289309343740982e+00
  1.0300435430046730e+00  1.0311843174572850e+00  1.0323536098044572e+00  1.0335517721186962e+00  1.0347791564725994e+00
  1.0360361149388988e+00  1.0373229995904247e+00  1.0386401625000572e+00  1.0399879557406764e+00  1.0413667313851172e+00
  1.0427768415061585e+00  1.0442186381765393e+00  1.0456924734689801e+00  1.0471986994562050e+00  1.0487376682109590e+00
  1.0503097318060111e+00  1.0519152423141456e+00  1.0535545518081539e+00  1.0552280123608242e+00  1.0569359760449348e+00
  1.0586787949332537e+00  1.0604568210985428e+00  1.0622704066135620e+00  1.0641199035510742e+00  1.0660056639838469e+00
  1.0679280399846522e+00  1.0698873836262643e+00  1.0718840469814575e+00  1.0739183821230025e+00  1.0759907411236667e+00
  1.0781014760562151e+00  1.0802509389934130e+00  1.0824394820080281e+00  1.0846674571728330e+00  1.0869352165606052e+00
  1.0892431122441242e+00  1.0915914962961661e+00  1.0939807207895005e+00  1.0964111377968857e+00  1.0988830993910714e+00
  1.1013969576448059e+00  1.1039530646308462e+00  1.1065517724219665e+00  1.1091934330909663e+00  1.1118783987106644e+00
  1.1146070213538775e+00  1.1173796530934001e+00  1.1201966460019821e+00  1.1230583521523150e+00  1.1259651236170527e+00
  1.1289173124688592e+00  1.1319152707804583e+00  1.1349593506246836e+00  1.1380499040745040e+00  1.1411872832029617e+00
  1.1443718400830589e+00  1.1476039267876419e+00  1.1508838953892879e+00  1.1542120979602657e+00  1.1575888865727089e+00
  1.1610146132988814e+00  1.1644896302114474e+00  1.1680142893837282e+00  1.1715889428897353e+00  1.1752139428037105e+00
  1.1788896411995047e+00  1.1826163901499522e+00  1.1863945417262922e+00  1.1902244479982522e+00  1.1941064610352223e+00
  1.1980409329077055e+00  1.2020282156887707e+00  1.2060686614553164e+00  1.2101626222874864e+00  1.2143104502657394e+00
  1.2185124974674741e+00  1.2227691159636553e+00  1.2270806578161528e+00  1.2314474750800364e+00  1.2358699198107457e+00
  1.2403483440719305e+00  1.2448830999432716e+00  1.2494745395257922e+00  1.2541230149343467e+00  1.2588288782803698e+00
  1.2635924816536583e+00  1.2684141771043109e+00  1.2732943166330244e+00  1.2782332522133879e+00  1.2832313358328931e+00
  1.2882889195352454e+00  1.2934063554618516e+00  1.2985839958667180e+00  1.3038221930543561e+00  1.3091212992831416e+00
  1.3144816666670494e+00  1.3199036470812522e+00  1.3253875921486440e+00  1.3309338534050654e+00  1.3365427825256633e+00
  1.3422147315531112e+00  1.3479500531091975e+00  1.3537491003702689e+00  1.3596122266425905e+00  1.3655397848342024e+00
  1.3715321269249594e+00  1.3775896035030399e+00  1.3837125639633001e+00  1.3899013575695640e+00  1.3961563346839887e+00
  1.4024778479970545e+00  1.4088662535086001e+00  1.4153219097245475e+00  1.4218451750549705e+00  1.4284364049562219e+00
  1.4350959490802209e+00  1.4418241493033435e+00  1.4486213423887122e+00  1.4554878662556276e+00  1.4624240666189845e+00
  1.4694303035769698e+00  1.4765069552504388e+00  1.4836544098225470e+00  1.4908730506192911e+00  1.4981632406885756e+00
  1.5055253076580988e+00  1.5129595380128191e+00  1.5204661993820370e+00  1.5280455757222133e+00  1.5356980031318901e+00
  1.5434239043441083e+00  1.5512237944323763e+00  1.5590982212788944e+00  1.5670476831264359e+00  1.5750725454004331e+00
  1.5831729632615672e+00  1.5913488884942530e+00  1.5996002229512094e+00  1.6079270109668993e+00  1.6163296324999796e+00
  1.6248089732325166e+00  1.6333663575103956e+00  1.6420031638609009e+00  1.6507203773354051e+00  1.6595181415096625e+00
  1.6683953968790077e+00  1.6773501578105459e+00  1.6863804494250640e+00  1.6954853412861663e+00  1.7046659789923675e+00
  1.7139263241146396e+00  1.7232723126736458e+00  1.7327097512595024e+00  1.7422420793760294e+00  1.7518681394467954e+00
  1.7615804162871307e+00  1.7713651753024466e+00  1.7812037689977311e+00  1.7910740307065638e+00  2.0796092971515268e-01
  2.0784775285327617e-01  2.0764408759721320e-01  2.0735030956685055e-01  2.0696694268366367e-01  2.0649465438595144e-01
  2.0593425084407099e-01  2.0528667217567256e-01  2.0455298766093419e-01  2.0373439095779661e-01  2.0283219531719798e-01
  2.0184782879830879e-01  2.0078282948376652e-01  1.9963884069491050e-01  1.9841760620701676e-01  1.9712096546453278e-01
  1.9575084879631227e-01  1.9430927263085002e-01  1.9279833471151667e-01  1.9122020931179351e-01  1.8957714245050727e-01
  1.8787144710706502e-01  1.8610549843668875e-01  1.8428172898565040e-01  1.8240262390650655e-01  1.8047071617333321e-01
  1.7848858179696067e-01  1.7645883504020826e-01  1.7438412363311914e-01  1.7226712398819521e-01  1.7011053641563167e-01
  1.6791708033855213e-01  1.6568948950824319e-01  1.6343050721938926e-01  1.6114288152530745e-01  1.5882936045318236e-01
  1.5649268721930071e-01  1.5413559544428640e-01  1.5176080436833517e-01  1.4937101406644931e-01  1.4696890066367266e-01
  1.4455711155032525e-01  1.4213826059723825e-01  1.3971492337098856e-01  1.3728963234913377e-01  1.3486487213544701e-01
  1.3244307467515148e-01  1.3002661447015562e-01  1.2761780379428755e-01  1.2521888790853020e-01  1.2283204027625580e-01
  1.2045935777846094e-01  1.1810285592900117e-01  1.1576446408982595e-01  1.1344602068768685e-01  1.1114926882411152e-01
  1.0887585478566157e-01  1.0662732954621830e-01  1.0440515070722819e-01  1.0221068444001906e-01  1.0004520742811625e-01
  9.7909908809558840e-02  9.5805892119215808e-02  9.3734177231102209e-02  9.1695702300695348e-02  8.9691325707251038e-02
  8.7721827996119675e-02  8.5787913821062517e-02  8.3890213886567810e-02  8.2029286890167002e-02  8.0205621464750909e-02
  7.8419638120885940e-02  7.6671691189130226e-02  7.4962070762349828e-02  7.3291004638034937e-02  7.1658660260616042e-02
  7.0065146663780137e-02  6.8510516412786826e-02  6.6994767546784642e-02  6.5517845521127063e-02  6.4079645149688974e-02
  6.2680012547182501e-02  6.1318747071473410e-02  5.9995603265897250e-02  5.8710292801575553e-02  5.7462486419731965e-02
  5.6251815874008494e-02  5.5077875872781665e-02  5.3940226021478709e-02  5.2838392764893702e-02  5.1771871329503852e-02
  5.0740127665785589e-02  4.9742600390530800e-02  4.8778702729162987e-02  4.7847824458053481e-02  4.6949333846837568e-02
  4.6082579600730755e-02  4.5246892802844912e-02  4.4441588856504455e-02  4.3665969427562512e-02  4.2919324386717139e-02
  4.2200933751827527e-02  4.1510069630230143e-02  4.0845998161054886e-02  4.0207981457541370e-02  3.9595279549355031e-02
  3.9007152324903288e-02  3.8442861473651863e-02  3.7901672428440787e-02  3.7382856287557040e-02  3.6885691298665452e-02
  3.6409463353461756e-02  3.5953466136128993e-02  3.5517001260827602e-02  3.5099378409185443e-02  3.4699915467787862e-02
  3.4317938665667763e-02  3.3952782711795630e-02  3.3603790932569634e-02  3.3270315409305626e-02  3.2951717115727266e-02
  3.2647366055456012e-02  3.2356641399501222e-02  3.2078931623750181e-02  3.1813634646458172e-02  3.1560157965738550e-02
  3.1317918797052743e-02  3.1086344210700386e-02  3.0864871269309299e-02  3.0652947165325597e-02  3.0450029358503727e-02
  3.0255585713396524e-02  3.0069094636845276e-02  2.9890045215469764e-02  2.9717937353158332e-02  2.9552281908557944e-02
  2.9392600832564234e-02  2.9238427305811557e-02  2.9089305876163062e-02  2.8944792596200732e-02  2.8804455160715448e-02
  2.8667873044197052e-02  2.8534637638324388e-02  2.8404352389455365e-02  2.8276632936117020e-02  2.8151107246495565e-02
  2.8027415755926446e-02  2.7905211504384408e-02  2.7784160273973530e-02  2.7663940726417306e-02  2.7544244540548692e-02
  2.7424776549800148e-02  2.7305254879693715e-02  2.7185411085331068e-02  2.7064990288883553e-02  2.6943751317082279e-02
  2.6821466838708129e-02  2.6697923502081861e-02  2.6572922072554128e-02  2.6446277569995562e-02  2.6317819406286816e-02
  2.6187391522808613e-02  2.6054852527931820e-02  2.5920075834007947e-02  2.5782949742018113e-02  2.5643377252207548e-02
  2.5501275662538066e-02  2.5356576145529486e-02  2.5209223325072590e-02  2.5059174853242092e-02  2.4906400987109573e-02
  2.4750884165556465e-02  2.4592618586086992e-02  2.4431609781641127e-02  2.4267874197407568e-02  2.4101438767636665e-02
  2.3932340492453411e-02  2.3760626014670373e-02  2.3586351196600665e-02  2.3409580696870901e-02  2.3230387547234155e-02
  2.3048852729382917e-02  2.2865064751762042e-02  2.2679119226381730e-02  2.2491118445630457e-02  2.2301170959087954e-02
  2.2109391150338154e-02  2.1915898813782156e-02  2.1720818731451166e-02  2.1524280249819481e-02  2.1326416856617431e-02
  2.1127365757644335e-02  2.0927267453581467e-02  2.0726265316805003e-02  2.0524505168198991e-02  2.0322134853968304e-02
  2.0119303822451591e-02  1.9916162700934242e-02  1.9712862872461351e-02  1.9509556052650659e-02  1.9306393866505522e-02
  1.9103527425227862e-02  1.8901106903031137e-02  1.8699281113953289e-02  1.8498197088669698e-02  1.8297999651306150e-02
  1.8098830996251786e-02  1.7900830264972068e-02  1.7704133122821732e-02  1.7508871335857740e-02  1.7315172347652254e-02
  1.7123158856105575e-02  1.6932948390259113e-02  1.6744652887108337e-02  1.6558378268415740e-02  1.6374224017523795e-02
  1.6192282756167908e-02  1.6012639821291960e-02  1.5835372855957274e-02  1.5660551598330519e-02  1.5488238003840082e-02
  1.5318486452850855e-02  1.5151343959883257e-02  1.4986850382832278e-02  1.4825038632186503e-02  1.4665934880247148e-02
  1.4509558770347087e-02  1.4355923626069895e-02  1.4205036660468864e-02  1.4056899185286048e-02  1.3911506820171291e-02
  1.3768849701901256e-02  1.3628912693598460e-02  1.3491675593950307e-02  1.3357113346428117e-02  1.3225196248506162e-02
  1.3095890160880688e-02  1.2969156716688964e-02  1.2844953530728297e-02  1.2723234408675075e-02  1.2603949556303794e-02
  1.2487045788706089e-02  1.2372466739509775e-02  1.2260153070097863e-02  1.2150042678827608e-02  1.2042070910249532e-02
  1.1936170764326459e-02  1.1832273105652543e-02  1.1730306872672305e-02  1.1630199286899665e-02  1.1531876062136967e-02
  1.1435261613694023e-02  1.1340279267607133e-02  1.1246851469858123e-02  1.1154899995593374e-02  1.1064346158342859e-02
  1.0975111019239172e-02  1.0887115596236559e-02  1.0800281073329946e-02  1.0714529009773986e-02  1.0629781549302070e-02
  1.0545961629345381e-02  1.0462993190251903e-02  1.0380801384505471e-02  1.0299312785944797e-02  1.0218455598982502e-02
  1.0138159867824143e-02  1.0058357685687254e-02  9.9789834040203765e-03  9.8999738417220769e-03  9.8212684943600054e-03
  9.7428097433898998e-03  9.6645430646248726e-03  9.5864171973485141e-03  9.5083841642530018e-03  9.4303992049092518e-03
  9.3524207033010079e-03  9.2744101153580949e-03  9.1963318964896762e-03  9.1181534291175093e-03  9.0398449502091995e-03
  8.9613794788114629e-03  8.8827327435833780e-03  8.8038831103296397e-03  8.7248115095338204e-03  8.6455013638916233e-03
  8.5659385158441369e-03  8.4861111551110934e-03  8.4060097462241284e-03  8.3256269560600307e-03  8.2449575813740000e-03
  8.1639984763329058e-03  8.0827484800485416e-03  8.0012083441108814e-03  7.9193806601213345e-03  7.8372697872260040e-03
  7.7548817796489408e-03  7.6722243142254027e-03  7.5893066179351055e-03  7.5061393954354849e-03  7.4227347565949502e-03
  7.3391061440261380e-03  7.2552682606191717e-03  7.1712369970749167e-03  7.0870293594382352e-03  7.0026633966312462e-03
  6.9181581279865742e-03  6.8335334707806152e-03  6.7488101677667858e-03  6.6640097147087794e-03  6.5791542879138258e-03
  6.4942666717659470e-03  6.4093701862592087e-03  6.3244886145309839e-03  6.2396461303952013e-03  6.1548672258756078e-03
  6.0701766387390201e-03  5.9855992800285840e-03  5.9011601615970273e-03  5.8168843236399218e-03  5.7327967622289302e-03
  5.6489223568450724e-03  5.5652857979119731e-03  5.4819115143291252e-03  5.3988236010051385e-03  5.3160457463910021e-03
  5.2336011600179616e-03  5.1515125030959629e-03  5.0698018481950052e-03  4.9884906755567537e-03  4.9075998762036777e-03
  4.8271497551087179e-03  4.7471600343649469e-03  4.6676498563552335e-03  4.5886377869219057e-03  4.5101418185364110e-03
  4.4321793734689828e-03  4.3547673069583006e-03  4.2779219103811546e-03  4.2016589144221088e-03  4.1259934922431600e-03
  4.0509402626534071e-03  3.9765132932787078e-03  3.9027261037313469e-03  3.8295916687796933e-03  3.7571224215178691e-03
  3.6853302565354085e-03  3.6142265330869209e-03  3.5438220782617546e-03  3.4741271901536611e-03  3.4051516410304548e-03
  3.3369046805036794e-03  3.2693950386982664e-03  3.2026309294222030e-03  3.1366200533361915e-03  3.0713696011233130e-03
  3.0068862566586907e-03  2.9431762001791532e-03  2.8802451114528960e-03  2.8180981729491452e-03  2.7567400730078213e-03
  2.6961750090091995e-03  2.6364066905435754e-03  2.5774383425809255e-03  2.5192727086405737e-03  2.4619120539608489e-03
  2.4053581686687519e-03  2.3496123709496179e-03  2.2946755102167772e-03  2.2405479702812198e-03  2.1872296725212589e-03
  2.1347200790521920e-03  2.0830181958959642e-03  2.0321225761508323e-03  1.9820313231610270e-03  1.9327420936864148e-03
  1.8842521010721622e-03  1.8365581184183986e-03  1.7896564817498780e-03  1.7435430931856425e-03  1.6982134241086857e-03
  1.6536625184130288e-03  1.6098849980890680e-03  1.5668750753163741e-03  1.5246265673648160e-03  1.4831329116203602e-03
  1.4423871806108716e-03  1.4023820970319126e-03  1.3631100487725423e-03  1.3245631039411176e-03  1.2867330258910915e-03
  1.2496112882468141e-03  1.2131890899293311e-03  1.1774573701821842e-03  1.1424068235972116e-03  1.1080279151403460e-03
  1.0743108951774159e-03  1.0412458144999418e-03  1.0088225393509438e-03  9.7703076645073430e-04  9.4586003802271895e-04
  9.1529975681919819e-04  8.8533920114716529e-04  8.5596753989410730e-04  8.2717384755380400e-04  7.9894711925212808e-04
  7.7127628577284451e-04  7.4415022858341073e-04  7.1755779486077612e-04  6.9148781251718154e-04  6.6592910522595967e-04
  6.4087050744733392e-04  6.1630087945421862e-04  5.9220912235801934e-04  5.6858419313443121e-04  5.4541511964923978e-04
  5.2269101568412093e-04  5.0040109596243931e-04  4.7853469117504913e-04  4.5708126300609436e-04  4.3603041915880620e-04
  4.1537192838130596e-04  3.9509573549240183e-04  3.7519197640739133e-04  3.5565099316385834e-04  3.3646334894747525e-04
  3.1761984311780116e-04  2.9911152623408161e-04  2.8092971508104979e-04  2.6306600769472458e-04  2.4551229838821087e-04
  2.2826079277750064e-04  2.1130402280726914e-04  1.9463486177667883e-04  1.7824653936517661e-04  1.6213265664914345e-04
  1.4628719934575864e-04  1.3070453930674977e-04  1.1537942490261027e-04  1.0030696994631269e-04  8.5482642612064722e-05
  7.0902254354065093e-05  5.6561948825259602e-05  4.2458190796097148e-05  2.8587755073285583e-05  1.4947715418547826e-05
  1.5354334673778412e-06 -1.1651452352203547e-05 -2.4615037900892434e-05 -3.7357164409346070e-05 -4.9879429559426645e-05
 -6.2183198565445523e-05 -7.4269615255407131e-05 -8.6139613152253142e-05 -9.7793926555106122e-05 -1.0923310162051401e-04
 -1.2045750744369376e-04 -1.3146734713977560e-04 -1.4226266892504712e-04 -1.5284337719819667e-04 -1.6320924362155830e-04
 -1.7335991820235502e-04 -1.8329494037394345e-04 -1.9301375007705701e-04 -2.0251569884105090e-04 -2.1180006086514528e-04
 -2.2086604409967000e-04 -2.2971280132730776e-04 -2.3833944124433925e-04 -2.4674503954188608e-04 -2.5492864998715548e-04
 -2.6288931550468410e-04 -2.7062607925758183e-04 -2.7813799572877637e-04 -2.8542414180225651e-04 -2.9248362784431686e-04
 -2.9931560878480141e-04 -3.0591929519834752e-04 -3.1229396438563038e-04 -3.1843897145460642e-04 -3.2435376040175804e-04
 -3.3003787519333689e-04 -3.3549097084660832e-04 -3.4071282451109543e-04 -3.4570334654982285e-04 -3.5046259162056098e-04
 -3.5499076975706951e-04 -3.5928825745034255e-04 -3.6335560872985124e-04 -3.6719356624478661e-04 -3.7080307209197064e-04
 -3.7418527386031742e-04 -3.7734152080734810e-04 -3.8027335688945303e-04 -3.8298251370721053e-04 -3.8547090345070564e-04
 -3.8774061184484917e-04 -3.8979389109469628e-04 -3.9163315283076547e-04 -3.9326096105435723e-04 -3.9468002508287312e-04
 -3.9589319249513444e-04 -3.9690344207670087e-04 -3.9771387676518975e-04 -3.9832771659559446e-04 -3.9874829164560349e-04
 -3.9897903498091919e-04 -3.9902347560057664e-04 -3.9888523138226239e-04 -3.9856800202763335e-04 -3.9807556200763554e-04
 -3.9741175350782311e-04 -3.9658047937367682e-04 -3.9558569605592330e-04 -3.9443140655585343e-04 -3.9312165337064152e-04
 -3.9166051143866394e-04 -3.9005208108481790e-04 -3.8830048096584051e-04 -3.8640984101562747e-04 -3.8438429539055168e-04
 -3.8222797541478254e-04 -3.7994500252560426e-04 -3.7753948121873509e-04 -3.7501549199364594e-04 -3.7237708429887920e-04
 -3.6962826947736766e-04 -3.6677301371175323e-04 -3.6381523096970584e-04 -3.6075877594924228e-04 -3.5760743702404496e-04
 -3.5436492918878068e-04 -3.5103488700441969e-04 -3.4762085754355416e-04 -3.4412629333571742e-04 -3.4055454531270229e-04
 -3.3690885575388048e-04 -3.3319235123152092e-04 -3.2940803555610879e-04 -3.2555878272166438e-04 -3.2164732985106188e-04
 -3.1767627014134812e-04 -3.1364804580906144e-04 -3.0956494103555072e-04 -3.0542907492768999e-04 -3.0124239576047394e-04
 -2.9700668129125501e-04 -2.9272354338068875e-04 -2.8839443300414814e-04 -2.8402064526344007e-04 -2.7960332439852162e-04
 -2.7514346879921651e-04 -2.7064193601693124e-04 -2.6609944777637176e-04 -2.6151659498725949e-04 -2.5689384275604768e-04
 -2.5223153539763812e-04 -2.4752990144709706e-04 -2.4278905867137167e-04 -2.3800901908100660e-04 -2.3318969394186002e-04
 -2.2833089878682020e-04 -2.2343235842752157e-04 -2.1849371196606152e-04 -2.1351451780671619e-04 -2.0849425866765732e-04
 -2.0343234659266817e-04 -1.9832812796286017e-04 -1.9318088850838917e-04 -1.8798985832017167e-04 -1.8275421686160138e-04
 -1.7747309798026527e-04 -1.7214559491966023e-04 -1.6677076533090922e-04 -1.6134763628447766e-04 -1.5587520928188970e-04
 -1.5035246526744480e-04 -1.4477836963993376e-04 -1.3915187726435527e-04 -1.3347193748363220e-04 -1.2773749913032792e-04
 -1.2194751553836264e-04 -1.1610094955472988e-04 -1.1019677855121253e-04 -1.0423399943609954e-04 -9.8211633665902016e-05
 -9.2128732257069646e-05 -8.5984380797707056e-05 -7.9777704459290088e-05 -7.3507873008382273e-05 -6.7174105818350994e-05
 -6.0775676881084061e-05 -5.4311919818705770e-05 -4.7782232895293448e-05 -4.1186084028593838e-05 -3.4523015801739265e-05
 -2.7792650474963993e-05 -2.0994694997320744e-05 -1.4128946018367813e-05 -7.1952948280028823e-06 -1.9373140320222407e-07
  6.8756529202356433e-06  1.4012663096272305e-05  2.1216998021965761e-05  2.8488248190806786e-05  3.5825893346055242e-05
  4.3229300134076489e-05  5.0697719757677591e-05  5.8230285629443766e-05  6.5826011025074736e-05  7.3483786736720937e-05
  8.1202378726320039e-05  8.8980425778933099e-05  9.6816437156081045e-05  1.0470879024908094e-04  1.1265572823238234e-04
  1.2065535771690364e-04  1.2870564640336837e-04  1.3680442073564164e-04  1.4494936355406634e-04  1.5313801174879959e-04
  1.6136775391314894e-04  1.6963582799690898e-04  1.7793931895969736e-04  1.8627515642429134e-04  1.9464011232996395e-04
  2.0303079858582059e-04  2.1144366472413513e-04  2.1987499555368637e-04  2.2832090881309429e-04  2.3677735282415653e-04
  2.4524010414518459e-04  2.5370476522434016e-04  2.6216676205297165e-04  2.7062134181895034e-04  2.7906357056000676e-04
  2.8748833081706701e-04  2.9589031928758919e-04  3.0426404447889973e-04  3.1260382436152962e-04  3.2090378402255075e-04
  3.2915785331891244e-04  3.3735976453077763e-04  3.4550305001485910e-04  3.5358103985775604e-04  3.6158685952929036e-04
  3.6951342753584296e-04  3.7735345307368976e-04  3.8509943368233887e-04  3.9274365289786601e-04  4.0027817790625137e-04
  4.0769485719671585e-04  4.1498531821505737e-04  4.2214096511660506e-04  4.2915298088824734e-04  4.3601234452610702e-04
  4.4270985619609949e-04  4.4923616287683257e-04  4.5558178400252852e-04  4.6173713710594610e-04  4.6769256346130211e-04
  4.7343835372719366e-04  4.7896477358951999e-04  4.8426208940440419e-04  4.8932059384111540e-04  4.9413063152499057e-04
  4.9868262468035635e-04  5.0296709877345090e-04  5.0697470815534631e-04  5.1069626170486984e-04  5.1412274847152618e-04
  5.1724536331841935e-04  5.2005553256517464e-04  5.2254493963086054e-04  5.2470555067691020e-04  5.2652964025004425e-04
  5.2800981692519163e-04  5.2913904894841257e-04  5.2991068987981969e-04  5.3031850423650010e-04  5.3035669313543777e-04
  5.3001991993643482e-04  5.2930333588503383e-04  5.2820260575543948e-04  5.2671393349344091e-04  5.2483408785933305e-04
  5.2256042807083891e-04  5.1989092944603127e-04  5.1682420904625506e-04  5.1335955131904859e-04  5.0949693374106593e-04
  5.0523705246099872e-04  5.0058134794249800e-04  4.9553203060709620e-04  4.9009210647712911e-04  4.8426540281865750e-04
  4.7805659378438953e-04  4.7147122605660226e-04  4.6451574449006354e-04  4.5719751775495421e-04  4.4952486397979003e-04
  4.4150707639434300e-04  4.3315444897256398e-04  4.2447830207550453e-04  4.1549100809423805e-04  4.0620601709278275e-04
  3.9663788245102293e-04  3.8680228649486342e-04  3.7671606064551235e-04  3.6639715903350844e-04  3.5586457840648613e-04
  3.4513826904126609e-04  3.3423904559410999e-04  3.2318849795097491e-04  3.1200890207776807e-04  3.0072313087060138e-04
  2.8935456500604615e-04  2.7792700379138753e-04  2.6646457601487935e-04  2.5499165079599857e-04  2.4353274843569989e-04
  2.3211245126667038e-04  2.2075531450358425e-04  2.0948577709335717e-04  1.9832807256540115e-04  1.8730613988187904e-04
  1.7644353428795909e-04  1.6576333816206961e-04  1.5528807186615366e-04  1.4503960459592353e-04  1.3503906523111548e-04
  1.2530675318574424e-04  1.1586204925835759e-04  1.0672332648229115e-04  9.7907860975922985e-05  8.9431742792927919e-05
  8.1309786772532436e-05  7.3555443389769232e-05  6.6180709605731807e-05  5.9196039717829036e-05  5.2610256210039864e-05
  4.6430460603167831e-05  4.0661944305095811e-05  3.5308099461040323e-05  3.0370329803806602e-05  2.5847961504042900e-05
  2.1738154020495130e-05  1.8035810950261437e-05  1.4733490879047110e-05  1.1821318231418668e-05  9.2868941210591527e-06
  7.1152072010220485e-06  5.2885445139862490e-06  3.7864023425109050e-06  2.5853970592893002e-06  1.6591759774043529e-06
  9.7832820058270809e-07  5.1029547344910026e-07  2.1928303178174674e-07  6.6170452766277105e-08  8.4225052509093699e-09
  0.0000000000000000e+00
   28 58.69  0 dummy #Atomic_number  atomic_mass (g/cm^3) lattice_constant lattice_type
 -1.0373300155080382e-01 -1.3304658462438035e-01 -1.6224752850022153e-01 -1.9133584075704588e-01 -2.2031153398613446e-01
 -2.4917462575711657e-01 -2.7792513858375578e-01 -3.0656309988973551e-01 -3.3508854197444493e-01 -3.6350150197876507e-01
 -3.9180202185085422e-01 -4.1999014831193393e-01 -4.4806593282207491e-01 -4.7602943154598276e-01 -5.0388070531878393e-01
 -5.3161981961181137e-01 -5.5924684449839035e-01 -5.8676185461962460e-01 -6.1416492915018162e-01 -6.4145615176407911e-01
 -6.6863561060047028e-01 -6.9570339822942984e-01 -7.2265961161773995e-01 -7.4950435209467614e-01 -7.7623772531779256e-01
 -8.0285984123870835e-01 -8.2937081406889357e-01 -8.5577076224545445e-01 -8.8205980839691978e-01 -9.0823807930902622e-01
 -9.3430570589050466e-01 -9.6026282313886580e-01 -9.8610957010618550e-01 -1.0118460898648920e+00 -1.0374725294735498e+00
 -1.0629890399426469e+00 -1.0883957762003806e+00 -1.1136928970584425e+00 -1.1388805651778049e+00 -1.1639589470345066e+00
 -1.1889282128854386e+00 -1.2137885367341297e+00 -1.2385400962965329e+00 -1.2631830729668110e+00 -1.2877176517831219e+00
 -1.3121440213934057e+00 -1.3364623740211683e+00 -1.3606729054312701e+00 -1.3847758148957092e+00 -1.4087713051594093e+00
 -1.4326595824060038e+00 -1.4564408562236231e+00 -1.4801153395706790e+00 -1.5036832487416523e+00 -1.5271448033328763e+00
 -1.5505002262083254e+00 -1.5737497434653980e+00 -1.5968935844007051e+00 -1.6199319814758535e+00 -1.6428651702832342e+00
 -1.6656933895118060e+00 -1.6884168809128828e+00 -1.7110358892659188e+00 -1.7335506623442942e+00 -1.7559614508811017e+00
 -1.7782685085349319e+00 -1.8004720918556580e+00 -1.8225724602502247e+00 -1.8445698759484304e+00 -1.8664646039687152e+00
 -1.8882569120839465e+00 -1.9099470707872044e+00 -1.9315353532575676e+00 -1.9530220353258991e+00 -1.9744073954406327e+00
 -1.9956917146335584e+00 -2.0168752764856075e+00 -2.0379583670926391e+00 -2.0589412750312270e+00 -2.0798242913244436e+00
 -2.1006077094076465e+00 -2.1212918250942652e+00 -2.1418769365415846e+00 -2.1623633442165349e+00 -2.1827513508614720e+00
 -2.2030412614599686e+00 -2.2232333832025954e+00 -2.2433280254527115e+00 -2.2633254997122467e+00 -2.2832261195874879e+00
 -2.3030302007548666e+00 -2.3227380609267438e+00 -2.3423500198171943e+00 -2.3618663991077957e+00 -2.3812875224134111e+00
 -2.4006137152479772e+00 -2.4198453049902882e+00 -2.4389826208497833e+00 -2.4580259938323321e+00 -2.4769757567060200e+00
 -2.4958322439669334e+00 -2.5145957918049477e+00 -2.5332667380695102e+00 -2.5518454222354290e+00 -2.5703321853686565e+00
 -2.5887273700920765e+00 -2.6070313205512883e+00 -2.6252443823803957e+00 -2.6433669026677897e+00 -2.6613992299219356e+00
 -2.6793417140371587e+00 -2.6971947062594315e+00 -2.7149585591521563e+00 -2.7326336265619542e+00 -2.7502202635844495e+00
 -2.7677188265300550e+00 -2.7851296728897590e+00 -2.8024531613009116e+00 -2.8196896515130079e+00 -2.8368395043534766e+00
 -2.8539030816934647e+00 -2.8708807464136221e+00 -2.8877728623698906e+00 -2.9045797943592868e+00 -2.9213019080856886e+00
 -2.9379395701256219e+00 -2.9544931478940457e+00 -2.9709630096101391e+00 -2.9873495242630841e+00 -3.0036530615778556e+00
 -3.0198739919810031e+00 -3.0360126865664401e+00 -3.0520695170612275e+00 -3.0680448557913609e+00 -3.0839390756475549e+00
 -3.0997525500510306e+00 -3.1154856529193014e+00 -3.1311387586319555e+00 -3.1467122419964468e+00 -3.1622064782138772e+00
 -3.1776218428447831e+00 -3.1929587117749234e+00 -3.2082174611810603e+00 -3.2233984674967520e+00 -3.2385021073781326e+00
 -3.2535287576697001e+00 -3.2684787953701031e+00 -3.2833525975979256e+00 -3.2981505415574737e+00 -3.3128730045045596e+00
 -3.3275203637122894e+00 -3.3420929964368482e+00 -3.3565912798832849e+00 -3.3710155911713002e+00 -3.3853663073010307e+00
 -3.3996438051188362e+00 -3.4138484612830822e+00 -3.4279806522299299e+00 -3.4420407541391209e+00 -3.4560291428997605e+00
 -3.4699461940761060e+00 -3.4837922828733530e+00 -3.4975677841034196e+00 -3.5112730721507313e+00 -3.5249085209380095e+00
 -3.5384745038920569e+00 -3.5519713939095410e+00 -3.5653995633227824e+00 -3.5787593838655400e+00 -3.5920512266387954e+00
 -3.6052754620765404e+00 -3.6184324599115620e+00 -3.6315225891412295e+00 -3.6445462179932782e+00 -3.6575037138915976e+00
 -3.6703954434220130e+00 -3.6832217722980789e+00 -3.6959830653268564e+00 -3.7086796863747038e+00 -3.7213119983330634e+00
 -3.7338803630842436e+00 -3.7463851414672051e+00 -3.7588266932433512e+00 -3.7712053770623095e+00 -3.7835215504277184e+00
 -3.7957755696630135e+00 -3.8079677898772131e+00 -3.8200985649307042e+00 -3.8321682474010301e+00 -3.8441771885486702e+00
 -3.8561257382828344e+00 -3.8680142451272426e+00 -3.8798430561859125e+00 -3.8916125171089453e+00 -3.9033229720583145e+00
 -3.9149747636736438e+00 -3.9265682330380027e+00 -3.9381037196436846e+00 -3.9495815613579972e+00 -3.9610020943890469e+00
 -3.9723656532515226e+00 -3.9836725707328196e+00 -3.9949231778678285e+00 -4.0061178039357443e+00 -4.0172567764655502e+00
 -4.0283404212418317e+00 -4.0393690623105920e+00 -4.0503430219850678e+00 -4.0612626208515445e+00 -4.0721281777751734e+00
 -4.0829400099057853e+00 -4.0936984326837056e+00 -4.1044037598455709e+00 -4.1150563034301459e+00 -4.1256563737841354e+00
 -4.1362042795680019e+00 -4.1467003277617822e+00 -4.1571448236709010e+00 -4.1675380709319851e+00 -4.1778803715186834e+00
 -4.1881720257474795e+00 -4.1984133322835051e+00 -4.2086045881463603e+00 -4.2187460887159256e+00 -4.2288381277381788e+00
 -4.2388809973310089e+00 -4.2488749879900345e+00 -4.2588203885944163e+00 -4.2687174864126742e+00 -4.2785665671085038e+00
 -4.2883679147465887e+00 -4.2981218117984188e+00 -4.3078285391481037e+00 -4.3174883760981917e+00 -4.3271016003754807e+00
 -4.3366684881368371e+00 -4.3461893139750103e+00 -4.3556643509244459e+00 -4.3650938704671072e+00 -4.3744781425382824e+00
 -4.3838174355324080e+00 -4.3931120163088790e+00 -4.4023621501978658e+00 -4.4115681010061323e+00 -4.4207301310228475e+00
 -4.4298485010254014e+00 -4.4389234702852249e+00 -4.4479552965735998e+00 -4.4569442361674776e+00 -4.4658905438552932e+00
 -4.4747944729427811e+00 -4.4836562752587934e+00 -4.4924762011611099e+00 -4.5012544995422585e+00 -4.5099914178353284e+00
 -4.5186872020197848e+00 -4.5273420966272866e+00 -4.5359563447475013e+00 -4.5445301880339191e+00 -4.5530638667096701e+00
 -4.5615576195733389e+00 -4.5700116840047791e+00 -4.5784262959709316e+00 -4.5868016900316375e+00 -4.5951380993454549e+00
 -4.6034357556754735e+00 -4.6116948893951308e+00 -4.6199157294940276e+00 -4.6280985035837432e+00 -4.6362434379036515e+00
 -4.6443507573267340e+00 -4.6524206853654002e+00 -4.6604534441772980e+00 -4.6684492545711311e+00 -4.6764083360124769e+00
 -4.6843309066295982e+00 -4.6922171832192596e+00 -4.7000673812525458e+00 -4.7078817148806742e+00 -4.7156603969408097e+00
 -4.7234036389618836e+00 -4.7311116511704068e+00 -4.7387846424962854e+00 -4.7464228205786361e+00 -4.7540263917716024e+00
 -4.7615955611501697e+00 -4.7691305325159803e+00 -4.7766315084031516e+00 -4.7840986900840878e+00 -4.7915322775752953e+00
 -4.7989324696432032e+00 -4.8062994638099727e+00 -4.8136334563593186e+00 -4.8209346423423174e+00 -4.8282032155832315e+00
 -4.8354393686853170e+00 -4.8426432930366428e+00 -4.8498151788159074e+00 -4.8569552149982496e+00 -4.8640635893610709e+00
 -4.8711404884898437e+00 -4.8781860977839315e+00 -4.8852006014624045e+00 -4.8921841825698520e+00 -4.8991370229821998e+00
 -4.9060593034125262e+00 -4.9129512034168750e+00 -4.9198129014000758e+00 -4.9266445746215544e+00 -4.9334463992011504e+00
 -4.9402185501249338e+00 -4.9469612012510176e+00 -4.9536745253153764e+00 -4.9603586939376605e+00 -4.9670138776270107e+00
 -4.9736402457878750e+00 -4.9802379667258245e+00 -4.9868072076533654e+00 -4.9933481346957604e+00 -4.9998609128968381e+00
 -5.0063457062248133e+00 -5.0128026775780992e+00 -5.0192319887911232e+00 -5.0256338006401471e+00 -5.0320082728490760e+00
 -5.0383555640952764e+00 -5.0446758320153924e+00 -5.0509692332111609e+00 -5.0572359232552291e+00 -5.0634760566969632e+00
 -5.0696897870682731e+00 -5.0758772668894192e+00 -5.0820386476748363e+00 -5.0881740799389412e+00 -5.0942837132019525e+00
 -5.1003676959957076e+00 -5.1064261758694736e+00 -5.1124592993957654e+00 -5.1184672121761619e+00 -5.1244500588471205e+00
 -5.1304079830857914e+00 -5.1363411276158359e+00 -5.1422496342132398e+00 -5.1481336437121268e+00 -5.1539932960105821e+00
 -5.1598287300764580e+00 -5.1656400839531944e+00 -5.1714274947656351e+00 -5.1771910987258405e+00 -5.1829310311389056e+00
 -5.1886474264087745e+00 -5.1943404180440531e+00 -5.2000101386638304e+00 -5.2056567200034900e+00 -5.2112802929205255e+00
 -5.2168809874003577e+00 -5.2224589325621489e+00 -5.2280142566646184e+00 -5.2335470871118606e+00 -5.2390575504591554e+00
 -5.2445457724187881e+00 -5.2500118778658633e+00 -5.2554559908441201e+00 -5.2608782345717486e+00 -5.2662787314472030e+00
 -5.2716576030550222e+00 -5.2770149701716376e+00 -5.2823509527711963e+00 -5.2876656700313731e+00 -5.2929592403391830e+00
 -5.2982317812968045e+00 -5.3034834097273844e+00 -5.3087142416808666e+00 -5.3139243924397928e+00 -5.3191139765251316e+00
 -5.3242831077020849e+00 -5.3294318989859057e+00 -5.3345604626477154e+00 -5.3396689102203192e+00 -5.3447573525040184e+00
 -5.3498258995724299e+00 -5.3548746607782984e+00 -5.3599037447593139e+00 -5.3649132594439273e+00 -5.3699033120571622e+00
 -5.3748740091264384e+00 -5.3798254564873780e+00 -5.3847577592896272e+00 -5.3896710220026707e+00 -5.3945653484216436e+00
 -5.3994408416731519e+00 -5.4042976042210853e+00 -5.4091357378724325e+00 -5.4139553437830985e+00 -5.4187565224637178e+00
 -5.4235393737854718e+00 -5.4283039969859015e+00 -5.4330504906747290e+00 -5.4377789528396656e+00 -5.4424894808522311e+00
 -5.4471821714735693e+00 -5.4518571208602529e+00 -5.4565144245697539e+00 -5.4611541775651062e+00 -5.4657764742192239e+00
 -5.4703814083192235e+00 -5.4749690730707306e+00 -5.4795395611022037e+00 -5.4840929644692409e+00 -5.4886293746588999e+00
 -5.4931488825940100e+00 -5.4976515786374884e+00 -5.5021375525966523e+00 -5.5066068937275396e+00 -5.5110596907392155e+00
 -5.5154960317980937e+00 -5.5199160045322486e+00 -5.5243196960357297e+00 -5.5287071928728766e+00 -5.5330785810826359e+00
 -5.5374339461828725e+00 -5.5417733731746859e+00 -5.5460969465467249e+00 -5.5504047502795046e+00 -5.5546968678497164e+00
 -5.5589733822345462e+00 -5.5632343759159877e+00 -5.5674799308851597e+00 -5.5717101286466164e+00 -5.5759250502226658e+00
 -5.5801247761576835e+00 -5.5843093865224267e+00 -5.5884789609183487e+00 -5.5926335784819159e+00 -5.5967733178889194e+00
 -5.6008982573587929e+00 -5.6050084746589253e+00 -5.6091040471089739e+00 -5.6131850515851855e+00 -5.6172515645247030e+00
 -5.6213036619298871e+00 -5.6253414193726243e+00 -5.6293649119986489e+00 -5.6333742145318526e+00 -5.6373694012786011e+00
 -5.6413505461320490e+00 -5.6453177225764515e+00 -5.6492710036914859e+00 -5.6532104621565589e+00 -5.6571361702551259e+00
 -5.6610481998790041e+00 -5.6649466225326881e+00 -5.6688315093376644e+00 -5.6727029310367243e+00 -5.6765609579982810e+00
 -5.6804056602206856e+00 -5.6842371073365356e+00 -5.6880553686169986e+00 -5.6918605129761186e+00 -5.6956526089751360e+00
 -5.6994317248268009e+00 -5.7031979283996863e+00 -5.7069512872225063e+00 -5.7106918684884285e+00 -5.7144197390593865e+00
 -5.7181349654704006e+00 -5.7218376139338867e+00 -5.7255277503439750e+00 -5.7292054402808219e+00 -5.7328707490149267e+00
 -5.7365237415114469e+00 -5.7401644824345084e+00 -5.7437930361515281e+00 -5.7474094667375200e+00 -5.7510138379794160e+00
 -5.7546062133803790e+00 -5.7581866561641162e+00 -5.7617552292791956e+00 -5.7653119954033603e+00 -5.7688570169478437e+00
 -5.7723903560616812e+00 -5.7759120746360306e+00 -5.7794222343084805e+00 -5.7829208964673695e+00 -5.7864081222561010e+00
 -5.7898839725774538e+00 -5.7933485080979024e+00 -5.7968017892519255e+00 -5.8002438762463262e+00 -5.8036748290645459e+00
 -5.8070947074709762e+00 -5.8105035710152739e+00 -5.8139014790366810e+00 -5.8172884906683313e+00 -5.8206646648415719e+00
 -5.8240300602902755e+00 -5.8273847355551531e+00 -5.8307287489880739e+00 -5.8340621587563737e+00 -5.8373850228471742e+00
 -5.8406973990716962e+00 -5.8439993450695749e+00 -5.8472909183131732e+00 -5.8505721761118989e+00 -5.8538431756165172e+00
 -5.8571039738234658e+00 -5.8603546275791709e+00 -5.8635951935843602e+00 -5.8668257283983802e+00 -5.8700462884435067e+00
 -5.8732569300092647e+00 -5.8764577092567398e+00 -5.8796486822228928e+00 -5.8828299048248773e+00 -5.8860014328643508e+00
 -5.8891633220317905e+00 -5.8923156279108113e+00 -5.8954584059824766e+00 -5.8985917116296136e+00 -5.9017156001411308e+00
 -5.9048301267163277e+00 -5.9079353464692161e+00 -5.9110313144328295e+00 -5.9141180855635387e+00 -5.9171957147453700e+00
 -5.9202642567943160e+00 -5.9233237664626515e+00 -5.9263742984432497e+00 -5.9294159073738957e+00 -5.9324486478415990e+00
 -5.9354725743869148e+00 -5.9384877415082507e+00 -5.9414942036661866e+00 -5.9444920152877891e+00 -5.9474812307709248e+00
 -5.9504619044885736e+00 -5.9534340907931487e+00 -5.9563978440208043e+00 -5.9593532184957567e+00 -5.9623002685345963e+00
 -5.9652390484506004e+00 -5.9681696125580519e+00 -5.9710920151765512e+00 -5.9740063106353318e+00 -5.9769125532775753e+00
 -5.9798107974647259e+00 -5.9827010975808053e+00 -5.9855835080367275e+00 -5.9884580832746117e+00 -5.9913248777721009e+00
 -5.9941839460466735e+00 -5.9970353426599585e+00 -5.9998791222220511e+00 -6.0027153393958281e+00 -6.0055440489012586e+00
 -6.0083653055197255e+00 -6.0111791640983343e+00 -6.0139856795542297e+00 -6.0167849068789110e+00 -6.0195769011425488e+00
 -6.0223617174982937e+00 -6.0251394111865961e+00 -6.0279100375395220e+00 -6.0306736519850617e+00 -6.0334303100514513e+00
 -6.0361800673714816e+00 -6.0389229796868173e+00 -6.0416591028523108e+00 -6.0443884928403131e+00 -6.0471112057449954e+00
 -6.0498272977866572e+00 -6.0525368253160456e+00 -6.0552398448186668e+00 -6.0579364129191040e+00 -6.0606265863853288e+00
 -6.0633104221330196e+00 -6.0659879772298728e+00 -6.0686593088999192e+00 -6.0713244745278407e+00 -6.0739835316632806e+00
 -6.0766365380251628e+00 -6.0792835515060020e+00 -6.0819246301762222e+00 -6.0845598322884724e+00 -6.0871892162819350e+00
 -6.0898128407866476e+00 -6.0924307646278146e+00 -6.0950430468301207e+00 -6.0976497466220492e+00 -6.1002509234401918e+00
 -6.1028466369335685e+00 -6.1054369469679397e+00 -6.1080219136301208e+00 -6.1106015972322973e+00 -6.1131760583163404e+00
 -6.1157453576581196e+00 -6.1183095562718197e+00 -6.1208687154142556e+00 -6.1234228965891848e+00 -6.1259721615516227e+00
 -6.1285165723121615e+00 -6.1310561911410000e+00 -6.1335910805647575e+00 -6.1361213033449351e+00 -6.1386469224491504e+00
 -6.1411680010220930e+00 -6.1436846023564824e+00 -6.1461967898640237e+00 -6.1487046270463663e+00 -6.1512081774660565e+00
 -6.1537075047174987e+00 -6.1562026723979093e+00 -6.1586937440782732e+00 -6.1611807832743022e+00 -6.1636638534173915e+00
 -6.1661430178255721e+00 -6.1686183396744756e+00 -6.1710898819682818e+00 -6.1735577075106827e+00 -6.1760218788758348e+00
 -6.1784824583793165e+00 -6.1809395080490868e+00 -6.1833930895964384e+00 -6.1858432643869588e+00 -6.1882900934114824e+00
 -6.1907336372570505e+00 -6.1931739560778656e+00 -6.1956111095662507e+00 -6.1980451569236017e+00 -6.2004761568313498e+00
 -6.2029041674219130e+00 -6.2053292462496561e+00 -6.2077514502618438e+00 -6.2101708357696026e+00 -6.2125874584188718e+00
 -6.2150013731613649e+00 -6.2174126342255231e+00 -6.2198212950874714e+00 -6.2222274084419791e+00 -6.2246310261734132e+00
 -6.2270321993266959e+00 -6.2294309780782617e+00 -6.2318274117070134e+00 -6.2342215485652783e+00 -6.2366134360497663e+00
 -6.2390031205725256e+00 -6.2413906475319001e+00 -6.2437760612834845e+00 -6.2461594051110811e+00 -6.2485407211976600e+00
 -6.2509200505963101e+00 -6.2532974332012010e+00 -6.2556729077185347e+00 -6.2580465116375068e+00 -6.2604182812012601e+00
 -6.2627882513778435e+00 -6.2651564558311668e+00 -6.2675229268919557e+00 -6.2698876955287153e+00 -6.2722507913186778e+00
 -6.2746122424187654e+00 -6.2769720755365448e+00 -6.2793303159011860e+00 -6.2816869872344121e+00 -6.2840421117214662e+00
 -6.2863957099820595e+00 -6.2887478010413327e+00 -6.2910984023008085e+00 -6.2934475295093550e+00 -6.2957951967341339e+00
 -6.2981414163315641e+00 -6.3004861989182750e+00 -6.3028295533420637e+00 -6.3051714866528519e+00 -6.3075120040736410e+00
 -6.3098511089714719e+00 -6.3121888028283788e+00 -6.3145250852123471e+00 -6.3168599537482706e+00 -6.3191934040889066e+00
 -6.3215254298858330e+00 -6.3238560227604053e+00 -6.3261851722747142e+00 -6.3285128659025407e+00 -6.3308390890003130e+00
 -6.3331638247780635e+00 -6.3354870542703843e+00 -6.3378087563073882e+00 -6.3401289074856582e+00 -6.3424474821392094e+00
 -6.3447644523104456e+00 -6.3470797877211123e+00 -6.3493934557432574e+00 -6.3517054213701858e+00 -6.3540156471874143e+00
 -6.3563240933436331e+00 -6.3586307175216579e+00 -6.3609354749093878e+00 -6.3632383181707635e+00 -6.3655391974167221e+00
 -6.3678380601761555e+00 -6.3701348513668643e+00 -6.3724295132665176e+00 -6.3747219854836068e+00 -6.3770122049284055e+00
 -6.3793001057839218e+00 -6.3815856194768585e+00 -6.3838686746485696e+00 -6.3861491971260156e+00 -6.3884271098927181e+00
 -6.3907023330597230e+00 -6.3929747838365492e+00 -6.3952443765021512e+00 -6.3975110223758724e+00 -6.3997746297884035e+00
 -6.4020351040527395e+00 -6.4042923474351330e+00 -6.4065462591260562e+00 -6.4087967352111512e+00 -6.4110436686421934e+00
 -6.4132869492080422e+00 -6.4155264635056009e+00 -6.4177620949107741e+00 -6.4199937235494211e+00 -6.4222212262683147e+00
 -6.4244444766060971e+00 -6.4266633447642389e+00 -6.4288776975779909e+00 -6.4310873984873460e+00 -6.4332923075079922e+00
 -6.4354922812022703e+00 -6.4376871726501319e+00 -6.4398768314200936e+00 -6.4420611035401949e+00 -6.4442398314689555e+00
 -6.4464128540663319e+00 -6.4485800065646712e+00 -6.4507411205396723e+00 -6.4528960238813395e+00 -6.4550445407649386e+00
 -6.4571864916219575e+00 -6.4593216931110558e+00 -6.4614499580890303e+00 -6.4635710955817647e+00 -6.4656849107551881e+00
 -6.4677912048862352e+00 -6.4698897753337965e+00 -6.4719804155096803e+00 -6.4740629148495659e+00 -6.4761370587839640e+00
 -6.4782026287091696e+00 -6.4802594019582207e+00 -6.4823071517718525e+00 -6.4843456472694596e+00 -6.4863746534200457e+00
 -6.4883939310131842e+00 -6.4904032366299758e+00 -6.4924023226140006e+00 -6.4943909370422812e+00 -6.4963688236962334e+00
 -6.4983357220326248e+00 -6.5002913671545333e+00 -6.5022354897823016e+00 -6.5041678162244949e+00 -6.5060880683488573e+00
 -6.5079959635532667e+00 -6.5098912147366947e+00 -6.5117735302701618e+00 -6.5136426139676926e+00 -6.5154981650572754e+00
 -6.5173398781518141e+00 -6.5191674432200921e+00 -6.5209805455577206e+00 -6.5227788657581014e+00 -6.5245620796833821e+00
 -6.5263298584354104e+00 -6.5280818683266935e+00 -6.5298177708513538e+00 -6.5315372226560848e+00 -6.5332398755111099e+00
 -6.5349253762811346e+00 -6.5365933668963097e+00 -6.5382434843231803e+00 -6.5398753605356506e+00 -6.5414886224859341e+00
 -6.5430828920755122e+00 -6.5446577861260922e+00 -6.5462129163505631e+00 -6.5477478893239507e+00 -6.5492623064543771e+00
 -6.5507557639540144e+00 -6.5522278528100451e+00 -6.5536781587556137e+00 -6.5551062622407867e+00 -6.5565117384035112e+00
 -6.5578941570405656e+00 -6.5592530825785209e+00 -6.5605880740446967e+00 -6.5618986850381162e+00 -6.5631844637004644e+00
 -6.5644449526870439e+00 -6.5656796891386291e+00 -6.5668882046766743e+00 -6.5680700254577857e+00 -6.5692246722515542e+00
 -6.5703516605192807e+00 -6.5714505004926975e+00 -6.5725206972527026e+00 -6.5735617508080768e+00 -6.5745731561742158e+00
 -6.5755544034518527e+00 -6.5765049779057856e+00 -6.5774243600436044e+00 -6.5783120256944141e+00 -6.5791674460875624e+00
 -6.5799900879313666e+00 -6.5807794134918352e+00 -6.5815348806714011e+00 -6.5822559430876408e+00 -6.5829420501520044e+00
 -6.5835926471485378e+00 -6.5842071753126135e+00 -6.5847850719096535e+00 -6.5853257703138546e+00 -6.5858287000869167e+00
 -6.5862932870567663e+00 -6.5867189533962849e+00 -6.5871051177020341e+00 -6.5874511950729788e+00 -6.5877565971892178e+00
 -6.5880207323907074e+00 -6.5882430057559853e+00 -6.5884228191809004e+00 -6.5885595714573375e+00 -6.5886526583519416e+00
 -6.5887014726848445e+00 -6.5887054044083921e+00 -6.5886638406858697e+00 -6.5885761659702275e+00 -6.5884417620828071e+00
 -6.5882600082920648e+00 -6.5880302813923031e+00 -6.5877519557823909e+00 -6.5874244035444933e+00 -6.5870469945227965e+00
 -6.5866190964022309e+00 -6.5861400747872034e+00 -6.5856092932803163e+00 -6.5850261135610975e+00 -6.5843898954647253e+00
 -6.5836999970607550e+00 -6.5829557747318441e+00 -6.5821565832524769e+00 -6.5813017758676944e+00 -6.5803907043718164e+00
 -6.5794227191871686e+00 -6.5783971694428098e+00 -6.5773134030532558e+00 -6.5761707667972065e+00 -6.5749686063962729e+00
 -6.5737062665937005e+00 -6.5723830912330978e+00 -6.5709984233371586e+00 -6.5695516051863940e+00 -6.5680419783978516e+00
 -6.5664688840038465e+00 -6.5648316625306853e+00 -6.5631296540773896e+00 -6.5613621983944279e+00 -6.5595286349624358e+00
 -6.5576283030709446e+00 -6.5556605418971072e+00 -6.5536246905844235e+00 -6.5515200883214666e+00 -6.5493460744206082e+00
 -6.5471019883967463e+00 -6.5447871700460274e+00 -6.5424009595245787e+00 -6.5399426974272252e+00 -6.5374117248662253e+00
 -6.5348073835499907e+00 -6.5321290158618117e+00 -6.5293759649385885e+00 -6.5265475747495509e+00 -6.5236431901749894e+00
 -6.5206621570849777e+00 -6.5176038224181001e+00 -6.5144675342601781e+00 -6.5112526419229946e+00 -6.5079584960230203e+00
 -6.5045844485601414e+00 -6.5011298529963826e+00 -6.4975940643346366e+00 -6.4939764391973860e+00 -6.4902763359054330e+00
 -6.4864931145566231e+00 -6.4826261371045701e+00 -6.4786747674373872e+00 -6.4746383714564057e+00 -6.4705163171549058e+00
 -6.4663079746968428e+00 -6.4620127164955692e+00 -6.4576299172925635e+00 -6.4531589542361569e+00 -6.4485992069602576e+00
 -6.4439500576630753e+00 -6.4392108911858514e+00 -6.4343810950915818e+00 -6.4294600597437412e+00 -6.4244471783850159e+00
 -6.4193418472160211e+00 -6.4141434654740337e+00 -6.4088514355117123e+00 -6.4034651628758308e+00 -6.3979840563859964e+00
 -6.3924075282133810e+00 -6.3867349939594433e+00 -6.3809658727346577e+00 -6.3750995872372398e+00 -6.3691355638318718e+00
 -6.3630732326284258e+00 -6.3569120275606963e+00 -6.3506513864651186e+00 -6.3442907511594999e+00 -6.3378295675217444e+00
 -6.3312672855685763e+00 -6.3246033595342706e+00 -6.3178372479493730e+00 -6.3109684137194328e+00 -6.3039963242037231e+00
 -6.2969204512939694e+00 -6.2897402714930744e+00 -6.2824552659938471e+00 -6.2750649207577220e+00 -6.2675687265934927e+00
 -6.2599661792360344e+00 -6.2522567794250268e+00 -6.2444400329836860e+00 -6.2365154508974872e+00 -6.2284825493928899e+00
 -6.2203408500160657e+00 -6.2120898797116224e+00 -6.2037291709013331e+00 -6.1952582615628584e+00 -6.1866766953084742e+00
 -6.1779840214637973e+00 -6.1691797951465128e+00 -6.1602635773450967e+00 -6.1512349349975457e+00 -6.1420934410701014e+00
 -6.1328386746359733e+00 -6.1234702209540721e+00 -6.1139876715477266e+00 -6.1043906242834174e+00 -6.0946786834494988e+00
 -6.0848514598349244e+00 -6.0749085708079757e+00 -6.0648496403949865e+00 -6.0546742993590676e+00 -6.0443821852788364e+00
 -6.0339729426271367e+00 -6.0234462228497723e+00 -6.0128016844442280e+00 -6.0020389930383944e+00 -5.9911578214692991e+00
 -5.9801578498618291e+00 -5.9690387657074542e+00 -5.9578002639429606e+00 -5.9464420470291692e+00 -5.9349638250296648e+00
 -5.9233653156895230e+00 -5.9116462445140341e+00 -5.8998063448474296e+00 -5.8878453579516110e+00 -5.8757630330848691e+00
 -5.8635591275806176e+00 -5.8512334069261138e+00 -5.8387856448411863e+00 -5.8262156233569611e+00 -5.8135231328945878e+00
 -5.8007079723439636e+00 -5.7877699491424632e+00 -5.7747088793536605e+00 -5.7615245877460550e+00 -5.7482169078718020e+00
 -5.7347856821454339e+00 -5.7212307619225893e+00 -5.7075520075787347e+00 -5.6937492885878953e+00 -5.6798224836013782e+00
 -5.6657714805264998e+00 -5.6515961766053096e+00 -5.6372964784933188e+00 -5.6228723023382239e+00 -5.6083235738586348e+00
 -5.5936502284227982e+00 -5.5788522111273267e+00 -5.5639294768759200e+00 -5.5488819904580993e+00 -5.5337097266279205e+00
 -5.5184126701827161e+00
  1.0000000000000000e+00  9.9999911120357854e-01  9.9999935313800281e-01  1.0000007536175852e+00  1.0000033849595378e+00
  1.0000073862353966e+00  1.0000129846358872e+00  1.0000205015249439e+00  1.0000303287615124e+00  1.0000428961228554e+00
  1.0000586385139318e+00  1.0000779645541698e+00  1.0001012415831729e+00  1.0001288051831130e+00  1.0001609742218731e+00
  1.0001980659700298e+00  1.0002404101796367e+00  1.0002883543681802e+00  1.0003422589705075e+00  1.0004024907972455e+00
  1.0004694164860879e+00  1.0005433966568236e+00  1.0006247844034923e+00  1.0007139276463446e+00  1.0008111719540911e+00
  1.0009168633615451e+00  1.0010313507379407e+00  1.0011549861029818e+00  1.0012881235334599e+00  1.0014311179475255e+00
  1.0015843238951474e+00  1.0017480946212700e+00  1.0019227820650582e+00  1.0021087373536726e+00  1.0023063113257658e+00
  1.0025158550491544e+00  1.0027377201804490e+00  1.0029722589128554e+00  1.0032198237574470e+00  1.0034807673177597e+00
  1.0037554420692767e+00  1.0040442002266334e+00  1.0043473937855816e+00  1.0046653746186833e+00  1.0049984945723638e+00
  1.0053471055601770e+00  1.0057115596093584e+00  1.0060922088358433e+00  1.0064894054027209e+00  1.0069035014784509e+00
  1.0073348491978129e+00  1.0077838006467661e+00  1.0082507078755434e+00  1.0087359229166108e+00  1.0092397978026486e+00
  1.0097626845826799e+00  1.0103049353264228e+00  1.0108669021178973e+00  1.0114489370476822e+00  1.0120513922051821e+00
  1.0126746196720837e+00  1.0133189715214017e+00  1.0139847998204623e+00  1.0146724566342364e+00  1.0153822940286625e+00
  1.0161146640732388e+00  1.0168699188410613e+00  1.0176484104074734e+00  1.0184504908486296e+00  1.0192765122400744e+00
  1.0201268266557424e+00  1.0210017861680889e+00  1.0219017428486887e+00  1.0228270487688542e+00  1.0237780560002419e+00
  1.0247551166152224e+00  1.0257585826867701e+00  1.0267888062882014e+00  1.0278461394929073e+00  1.0289309343740982e+00
  1.0300435430046730e+00  1.0311843174572850e+00  1.0323536098044572e+00  1.0335517721186962e+00  1.0347791564725994e+00
  1.0360361149388988e+00  1.0373229995904247e+00  1.0386401625000572e+00  1.0399879557406764e+00  1.0413667313851172e+00
  1.0427768415061585e+00  1.0442186381765393e+00  1.0456924734689801e+00  1.0471986994562050e+00  1.0487376682109590e+00
  1.0503097318060111e+00  1.0519152423141456e+00  1.0535545518081539e+00  1.0552280123608242e+00  1.0569359760449348e+00
  1.0586787949332537e+00  1.0604568210985428e+00  1.0622704066135620e+00  1.0641199035510742e+00  1.0660056639838469e+00
  1.0679280399846522e+00  1.0698873836262643e+00  1.0718840469814575e+00  1.0739183821230025e+00  1.0759907411236667e+00
  1.0781014760562151e+00  1.0802509389934130e+00  1.0824394820080281e+00  1.0846674571728330e+00  1.0869352165606052e+00
  1.0892431122441242e+00  1.0915914962961661e+00  1.0939807207895005e+00  1.0964111377968857e+00  1.0988830993910714e+00
  1.1013969576448059e+00  1.1039530646308462e+00  1.1065517724219665e+00  1.1091934330909663e+00  1.1118783987106644e+00
  1.1146070213538775e+00  1.1173796530934001e+00  1.1201966460019821e+00  1.1230583521523150e+00  1.1259651236170527e+00
  1.1289173124688592e+00  1.1319152707804583e+00  1.1349593506246836e+00  1.1380499040745040e+00  1.1411872832029617e+00
  1.1443718400830589e+00  1.1476039267876419e+00  1.1508838953892879e+00  1.1542120979602657e+00  1.1575888865727089e+00
  1.1610146132988814e+00  1.1644896302114474e+00  1.1680142893837282e+00  1.1715889428897353e+00  1.1752139428037105e+00
  1.1788896411995047e+00  1.1826163901499522e+00  1.1863945417262922e+00  1.1902244479982522e+00  1.1941064610352223e+00
  1.1980409329077055e+00  1.2020282156887707e+00  1.2060686614553164e+00  1.2101626222874864e+00  1.2143104502657394e+00
  1.2185124974674741e+00  1.2227691159636553e+00  1.2270806578161528e+00  1.2314474750800364e+00  1.2358699198107457e+00
  1.2403483440719305e+00  1.2448830999432716e+00  1.2494745395257922e+00  1.2541230149343467e+00  1.2588288782803698e+00
  1.2635924816536583e+00  1.2684141771043109e+00  1.2732943166330244e+00  1.2782332522133879e+00  1.2832313358328931e+00
  1.2882889195352454e+00  1.2934063554618516e+00  1.2985839958667180e+00  1.3038221930543561e+00  1.3091212992831416e+00
  1.3144816666670494e+00  1.3199036470812522e+00  1.3253875921486440e+00  1.3309338534050654e+00  1.3365427825256633e+00
  1.3422147315531112e+00  1.3479500531091975e+00  1.3537491003702689e+00  1.3596122266425905e+00  1.3655397848342024e+00
  1.3715321269249594e+00  1.3775896035030399e+00  1.3837125639633001e+00  1.3899013575695640e+00  1.3961563346839887e+00
  1.4024778479970545e+00  1.4088662535086001e+00  1.4153219097245475e+00  1.4218451750549705e+00  1.4284364049562219e+00
  1.4350959490802209e+00  1.4418241493033435e+00  1.4486213423887122e+00  1.4554878662556276e+00  1.4624240666189845e+00
  1.4694303035769698e+00  1.4765069552504388e+00  1.4836544098225470e+00  1.4908730506192911e+00  1.4981632406885756e+00
  1.5055253076580988e+00  1.5129595380128191e+00  1.5204661993820370e+00  1.5280455757222133e+00  1.5356980031318901e+00
  1.5434239043441083e+00  1.5512237944323763e+00  1.5590982212788944e+00  1.5670476831264359e+00  1.5750725454004331e+00
  1.5831729632615672e+00  1.5913488884942530e+00  1.5996002229512094e+00  1.6079270109668993e+00  1.6163296324999796e+00
  1.6248089732325166e+00  1.6333663575103956e+00  1.6420031638609009e+00  1.6507203773354051e+00  1.6595181415096625e+00
  1.6683953968790077e+00  1.6773501578105459e+00  1.6863804494250640e+00  1.6954853412861663e+00  1.7046659789923675e+00
  1.7139263241146396e+00  1.7232723126736458e+00  1.7327097512595024e+00  1.7422420793760294e+00  1.7518681394467954e+00
  1.7615804162871307e+00  1.7713651753024466e+00  1.7812037689977311e+00  1.7910740307065638e+00  2.0796092971515268e-01
  2.0784775285327617e-01  2.0764408759721320e-01  2.0735030956685055e-01  2.0696694268366367e-01  2.0649465438595144e-01
  2.0593425084407099e-01  2.0528667217567256e-01  2.0455298766093419e-01  2.0373439095779661e-01  2.0283219531719798e-01
  2.0184782879830879e-01  2.0078282948376652e-01  1.9963884069491050e-01  1.9841760620701676e-01  1.9712096546453278e-01
  1.9575084879631227e-01  1.9430927263085002e-01  1.9279833471151667e-01  1.9122020931179351e-01  1.8957714245050727e-01
  1.8787144710706502e-01  1.8610549843668875e-01  1.8428172898565040e-01  1.8240262390650655e-01  1.8047071617333321e-01
  1.7848858179696067e-01  1.7645883504020826e-01  1.7438412363311914e-01  1.7226712398819521e-01  1.7011053641563167e-01
  1.6791708033855213e-01  1.6568948950824319e-01  1.6343050721938926e-01  1.6114288152530745e-01  1.5882936045318236e-01
  1.5649268721930071e-01  1.5413559544428640e-01  1.5176080436833517e-01  1.4937101406644931e-01  1.4696890066367266e-01
  1.4455711155032525e-01  1.4213826059723825e-01  1.3971492337098856e-01  1.3728963234913377e-01  1.3486487213544701e-01
  1.3244307467515148e-01  1.3002661447015562e-01  1.2761780379428755e-01  1.2521888790853020e-01  1.2283204027625580e-01
  1.2045935777846094e-01  1.1810285592900117e-01  1.1576446408982595e-01  1.1344602068768685e-01  1.1114926882411152e-01
  1.0887585478566157e-01  1.0662732954621830e-01  1.0440515070722819e-01  1.0221068444001906e-01  1.0004520742811625e-01
  9.7909908809558840e-02  9.5805892119215808e-02  9.3734177231102209e-02  9.1695702300695348e-02  8.9691325707251038e-02
  8.7721827996119675e-02  8.5787913821062517e-02  8.3890213886567810e-02  8.2029286890167002e-02  8.0205621464750909e-02
  7.8419638120885940e-02  7.6671691189130226e-02  7.4962070762349828e-02  7.3291004638034937e-02  7.1658660260616042e-02
  7.0065146663780137e-02  6.8510516412786826e-02  6.6994767546784642e-02  6.5517845521127063e-02  6.4079645149688974e-02
  6.2680012547182501e-02  6.1318747071473410e-02  5.9995603265897250e-02  5.8710292801575553e-02  5.7462486419731965e-02
  5.6251815874008494e-02  5.5077875872781665e-02  5.3940226021478709e-02  5.2838392764893702e-02  5.1771871329503852e-02
  5.0740127665785589e-02  4.9742600390530800e-02  4.8778702729162987e-02  4.7847824458053481e-02  4.6949333846837568e-02
  4.6082579600730755e-02  4.5246892802844912e-02  4.4441588856504455e-02  4.3665969427562512e-02  4.2919324386717139e-02
  4.2200933751827527e-02  4.1510069630230143e-02  4.0845998161054886e-02  4.0207981457541370e-02  3.9595279549355031e-02
  3.9007152324903288e-02  3.8442861473651863e-02  3.7901672428440787e-02  3.7382856287557040e-02  3.6885691298665452e-02
  3.6409463353461756e-02  3.5953466136128993e-02  3.5517001260827602e-02  3.5099378409185443e-02  3.4699915467787862e-02
  3.4317938665667763e-02  3.3952782711795630e-02  3.3603790932569634e-02  3.3270315409305626e-02  3.2951717115727266e-02
  3.2647366055456012e-02  3.2356641399501222e-02  3.2078931623750181e-02  3.1813634646458172e-02  3.1560157965738550e-02
  3.1317918797052743e-02  3.1086344210700386e-02  3.0864871269309299e-02  3.0652947165325597e-02  3.0450029358503727e-02
  3.0255585713396524e-02  3.0069094636845276e-02  2.9890045215469764e-02  2.9717937353158332e-02  2.9552281908557944e-02
  2.9392600832564234e-02  2.9238427305811557e-02  2.9089305876163062e-02  2.8944792596200732e-02  2.8804455160715448e-02
  2.8667873044197052e-02  2.8534637638324388e-02  2.8404352389455365e-02  2.8276632936117020e-02  2.8151107246495565e-02
  2.8027415755926446e-02  2.7905211504384408e-02  2.7784160273973530e-02  2.7663940726417306e-02  2.7544244540548692e-02
  2.7424776549800148e-02  2.7305254879693715e-02  2.7185411085331068e-02  2.7064990288883553e-02  2.6943751317082279e-02
  2.6821466838708129e-02  2.6697923502081861e-02  2.6572922072554128e-02  2.6446277569995562e-02  2.6317819406286816e-02
  2.6187391522808613e-02  2.6054852527931820e-02  2.5920075834007947e-02  2.5782949742018113e-02  2.5643377252207548e-02
  2.5501275662538066e-02  2.5356576145529486e-02  2.5209223325072590e-02  2.5059174853242092e-02  2.4906400987109573e-02
  2.4750884165556465e-02  2.4592618586086992e-02  2.4431609781641127e-02  2.4267874197407568e-02  2.4101438767636665e-02
  2.3932340492453411e-02  2.3760626014670373e-02  2.3586351196600665e-02  2.3409580696870901e-02  2.3230387547234155e-02
  2.3048852729382917e-02  2.2865064751762042e-02  2.2679119226381730e-02  2.2491118445630457e-02  2.2301170959087954e-02
  2.2109391150338154e-02  2.1915898813782156e-02  2.1720818731451166e-02  2.1524280249819481e-02  2.1326416856617431e-02
  2.1127365757644335e-02  2.0927267453581467e-02  2.0726265316805003e-02  2.0524505168198991e-02  2.0322134853968304e-02
  2.0119303822451591e-02  1.9916162700934242e-02  1.9712862872461351e-02  1.9509556052650659e-02  1.9306393866505522e-02
  1.9103527425227862e-02  1.8901106903031137e-02  1.8699281113953289e-02  1.8498197088669698e-02  1.8297999651306150e-02
  1.8098830996251786e-02  1.7900830264972068e-02  1.7704133122821732e-02  1.7508871335857740e-02  1.7315172347652254e-02
  1.7123158856105575e-02  1.6932948390259113e-02  1.6744652887108337e-02  1.6558378268415740e-02  1.6374224017523795e-02
  1.6192282756167908e-02  1.6012639821291960e-02  1.5835372855957274e-02  1.5660551598330519e-02  1.5488238003840082e-02
  1.5318486452850855e-02  1.5151343959883257e-02  1.4986850382832278e-02  1.4825038632186503e-02  1.4665934880247148e-02
  1.4509558770347087e-02  1.4355923626069895e-02  1.4205036660468864e-02  1.4056899185286048e-02  1.3911506820171291e-02
  1.3768849701901256e-02  1.3628912693598460e-02  1.3491675593950307e-02  1.3357113346428117e-02  1.3225196248506162e-02
  1.3095890160880688e-02  1.2969156716688964e-02  1.2844953530728297e-02  1.2723234408675075e-02  1.2603949556303794e-02
  1.2487045788706089e-02  1.2372466739509775e-02  1.2260153070097863e-02  1.2150042678827608e-02  1.2042070910249532e-02
  1.1936170764326459e-02  1.1832273105652543e-02  1.1730306872672305e-02  1.1630199286899665e-02  1.1531876062136967e-02
  1.1435261613694023e-02  1.1340279267607133e-02  1.1246851469858123e-02  1.1154899995593374e-02  1.1064346158342859e-02
  1.0975111019239172e-02  1.0887115596236559e-02  1.0800281073329946e-02  1.0714529009773986e-02  1.0629781549302070e-02
  1.0545961629345381e-02  1.0462993190251903e-02  1.0380801384505471e-02  1.0299312785944797e-02  1.0218455598982502e-02
  1.0138159867824143e-02  1.0058357685687254e-02  9.9789834040203765e-03  9.8999738417220769e-03  9.8212684943600054e-03
  9.7428097433898998e-03  9.6645430646248726e-03  9.5864171973485141e-03  9.5083841642530018e-03  9.4303992049092518e-03
  9.3524207033010079e-03  9.2744101153580949e-03  9.1963318964896762e-03  9.1181534291175093e-03  9.0398449502091995e-03
  8.9613794788114629e-03  8.8827327435833780e-03  8.8038831103296397e-03  8.7248115095338204e-03  8.6455013638916233e-03
  8.5659385158441369e-03  8.4861111551110934e-03  8.4060097462241284e-03  8.3256269560600307e-03  8.2449575813740000e-03
  8.1639984763329058e-03  8.0827484800485416e-03  8.0012083441108814e-03  7.9193806601213345e-03  7.8372697872260040e-03
  7.7548817796489408e-03  7.6722243142254027e-03  7.5893066179351055e-03  7.5061393954354849e-03  7.4227347565949502e-03
  7.3391061440261380e-03  7.2552682606191717e-03  7.1712369970749167e-03  7.0870293594382352e-03  7.0026633966312462e-03
  6.9181581279865742e-03  6.8335334707806152e-03  6.7488101677667858e-03  6.6640097147087794e-03  6.5791542879138258e-03
  6.4942666717659470e-03  6.4093701862592087e-03  6.3244886145309839e-03  6.2396461303952013e-03  6.1548672258756078e-03
  6.0701766387390201e-03  5.9855992800285840e-03  5.9011601615970273e-03  5.8168843236399218e-03  5.7327967622289302e-03
  5.6489223568450724e-03  5.5652857979119731e-03  5.4819115143291252e-03  5.3988236010051385e-03  5.3160457463910021e-03
  5.2336011600179616e-03  5.1515125030959629e-03  5.0698018481950052e-03  4.9884906755567537e-03  4.9075998762036777e-03
  4.8271497551087179e-03  4.7471600343649469e-03  4.6676498563552335e-03  4.5886377869219057e-03  4.5101418185364110e-03
  4.4321793734689828e-03  4.3547673069583006e-03  4.2779219103811546e-03  4.2016589144221088e-03  4.1259934922431600e-03
  4.0509402626534071e-03  3.9765132932787078e-03  3.9027261037313469e-03  3.8295916687796933e-03  3.7571224215178691e-03
  3.6853302565354085e-03  3.6142265330869209e-03  3.5438220782617546e-03  3.4741271901536611e-03  3.4051516410304548e-03
  3.3369046805036794e-03  3.2693950386982664e-03  3.2026309294222030e-03  3.1366200533361915e-03  3.0713696011233130e-03
  3.0068862566586907e-03  2.9431762001791532e-03  2.8802451114528960e-03  2.8180981729491452e-03  2.7567400730078213e-03
  2.6961750090091995e-03  2.6364066905435754e-03  2.5774383425809255e-03  2.5192727086405737e-03  2.4619120539608489e-03
  2.4053581686687519e-03  2.3496123709496179e-03  2.2946755102167772e-03  2.2405479702812198e-03  2.1872296725212589e-03
  2.1347200790521920e-03  2.0830181958959642e-03  2.0321225761508323e-03  1.9820313231610270e-03  1.9327420936864148e-03
  1.8842521010721622e-03  1.8365581184183986e-03  1.7896564817498780e-03  1.7435430931856425e-03  1.6982134241086857e-03
  1.6536625184130288e-03  1.6098849980890680e-03  1.5668750753163741e-03  1.5246265673648160e-03  1.4831329116203602e-03
  1.4423871806108716e-03  1.4023820970319126e-03  1.3631100487725423e-03  1.3245631039411176e-03  1.2867330258910915e-03
  1.2496112882468141e-03  1.2131890899293311e-03  1.1774573701821842e-03  1.1424068235972116e-03  1.1080279151403460e-03
  1.0743108951774159e-03  1.0412458144999418e-03  1.0088225393509438e-03  9.7703076645073430e-04  9.4586003802271895e-04
  9.1529975681919819e-04  8.8533920114716529e-04  8.5596753989410730e-04  8.2717384755380400e-04  7.9894711925212808e-04
  7.7127628577284451e-04  7.4415022858341073e-04  7.1755779486077612e-04  6.9148781251718154e-04  6.6592910522595967e-04
  6.4087050744733392e-04  6.1630087945421862e-04  5.9220912235801934e-04  5.6858419313443121e-04  5.4541511964923978e-04
  5.2269101568412093e-04  5.0040109596243931e-04  4.7853469117504913e-04  4.5708126300609436e-04  4.3603041915880620e-04
  4.1537192838130596e-04  3.9509573549240183e-04  3.7519197640739133e-04  3.5565099316385834e-04  3.3646334894747525e-04
  3.1761984311780116e-04  2.9911152623408161e-04  2.8092971508104979e-04  2.6306600769472458e-04  2.4551229838821087e-04
  2.2826079277750064e-04  2.1130402280726914e-04  1.9463486177667883e-04  1.7824653936517661e-04  1.6213265664914345e-04
  1.4628719934575864e-04  1.3070453930674977e-04  1.1537942490261027e-04  1.0030696994631269e-04  8.5482642612064722e-05
  7.0902254354065093e-05  5.6561948825259602e-05  4.2458190796097148e-05  2.8587755073285583e-05  1.4947715418547826e-05
  1.5354334673778412e-06 -1.1651452352203547e-05 -2.4615037900892434e-05 -3.7357164409346070e-05 -4.9879429559426645e-05
 -6.2183198565445523e-05 -7.4269615255407131e-05 -8.6139613152253142e-05 -9.7793926555106122e-05 -1.0923310162051401e-04
 -1.2045750744369376e-04 -1.3146734713977560e-04 -1.4226266892504712e-04 -1.5284337719819667e-04 -1.6320924362155830e-04
 -1.7335991820235502e-04 -1.8329494037394345e-04 -1.9301375007705701e-04 -2.0251569884105090e-04 -2.1180006086514528e-04
 -2.2086604409967000e-04 -2.2971280132730776e-04 -2.3833944124433925e-04 -2.4674503954188608e-04 -2.5492864998715548e-04
 -2.6288931550468410e-04 -2.7062607925758183e-04 -2.7813799572877637e-04 -2.8542414180225651e-04 -2.9248362784431686e-04
 -2.9931560878480141e-04 -3.0591929519834752e-04 -3.1229396438563038e-04 -3.1843897145460642e-04 -3.2435376040175804e-04
 -3.3003787519333689e-04 -3.3549097084660832e-04 -3.4071282451109543e-04 -3.4570334654982285e-04 -3.5046259162056098e-04
 -3.5499076975706951e-04 -3.5928825745034255e-04 -3.6335560872985124e-04 -3.6719356624478661e-04 -3.7080307209197064e-04
 -3.7418527386031742e-04 -3.7734152080734810e-04 -3.8027335688945303e-04 -3.8298251370721053e-04 -3.8547090345070564e-04
 -3.8774061184484917e-04 -3.8979389109469628e-04 -3.9163315283076547e-04 -3.9326096105435723e-04 -3.9468002508287312e-04
 -3.9589319249513444e-04 -3.9690344207670087e-04 -3.9771387676518975e-04 -3.9832771659559446e-04 -3.9874829164560349e-04
 -3.9897903498091919e-04 -3.9902347560057664e-04 -3.9888523138226239e-04 -3.9856800202763335e-04 -3.9807556200763554e-04
 -3.9741175350782311e-04 -3.9658047937367682e-04 -3.9558569605592330e-04 -3.9443140655585343e-04 -3.9312165337064152e-04
 -3.9166051143866394e-04 -3.9005208108481790e-04 -3.8830048096584051e-04 -3.8640984101562747e-04 -3.8438429539055168e-04
 -3.8222797541478254e-04 -3.7994500252560426e-04 -3.7753948121873509e-04 -3.7501549199364594e-04 -3.7237708429887920e-04
 -3.6962826947736766e-04 -3.6677301371175323e-04 -3.6381523096970584e-04 -3.6075877594924228e-04 -3.5760743702404496e-04
 -3.5436492918878068e-04 -3.5103488700441969e-04 -3.4762085754355416e-04 -3.4412629333571742e-04 -3.4055454531270229e-04
 -3.3690885575388048e-04 -3.3319235123152092e-04 -3.2940803555610879e-04 -3.2555878272166438e-04 -3.2164732985106188e-04
 -3.1767627014134812e-04 -3.1364804580906144e-04 -3.0956494103555072e-04 -3.0542907492768999e-04 -3.0124239576047394e-04
 -2.9700668129125501e-04 -2.9272354338068875e-04 -2.8839443300414814e-04 -2.8402064526344007e-04 -2.7960332439852162e-04
 -2.7514346879921651e-04 -2.7064193601693124e-04 -2.6609944777637176e-04 -2.6151659498725949e-04 -2.5689384275604768e-04
 -2.5223153539763812e-04 -2.4752990144709706e-04 -2.4278905867137167e-04 -2.3800901908100660e-04 -2.3318969394186002e-04
 -2.2833089878682020e-04 -2.2343235842752157e-04 -2.1849371196606152e-04 -2.1351451780671619e-04 -2.0849425866765732e-04
 -2.0343234659266817e-04 -1.9832812796286017e-04 -1.9318088850838917e-04 -1.8798985832017167e-04 -1.8275421686160138e-04
 -1.7747309798026527e-04 -1.7214559491966023e-04 -1.6677076533090922e-04 -1.6134763628447766e-04 -1.5587520928188970e-04
 -1.5035246526744480e-04 -1.4477836963993376e-04 -1.3915187726435527e-04 -1.3347193748363220e-04 -1.2773749913032792e-04
 -1.2194751553836264e-04 -1.1610094955472988e-04 -1.1019677855121253e-04 -1.0423399943609954e-04 -9.8211633665902016e-05
 -9.2128732257069646e-05 -8.5984380797707056e-05 -7.9777704459290088e-05 -7.3507873008382273e-05 -6.7174105818350994e-05
 -6.0775676881084061e-05 -5.4311919818705770e-05 -4.7782232895293448e-05 -4.1186084028593838e-05 -3.4523015801739265e-05
 -2.7792650474963993e-05 -2.0994694997320744e-05 -1.4128946018367813e-05 -7.1952948280028823e-06 -1.9373140320222407e-07
  6.8756529202356433e-06  1.4012663096272305e-05  2.1216998021965761e-05  2.8488248190806786e-05  3.5825893346055242e-05
  4.3229300134076489e-05  5.0697719757677591e-05  5.8230285629443766e-05  6.5826011025074736e-05  7.3483786736720937e-05
  8.1202378726320039e-05  8.8980425778933099e-05  9.6816437156081045e-05  1.0470879024908094e-04  1.1265572823238234e-04
  1.2065535771690364e-04  1.2870564640336837e-04  1.3680442073564164e-04  1.4494936355406634e-04  1.5313801174879959e-04
  1.6136775391314894e-04  1.6963582799690898e-04  1.7793931895969736e-04  1.8627515642429134e-04  1.9464011232996395e-04
  2.0303079858582059e-04  2.1144366472413513e-04  2.1987499555368637e-04  2.2832090881309429e-04  2.3677735282415653e-04
  2.4524010414518459e-04  2.5370476522434016e-04  2.6216676205297165e-04  2.7062134181895034e-04  2.7906357056000676e-04
  2.8748833081706701e-04  2.9589031928758919e-04  3.0426404447889973e-04  3.1260382436152962e-04  3.2090378402255075e-04
  3.2915785331891244e-04  3.3735976453077763e-04  3.4550305001485910e-04  3.5358103985775604e-04  3.6158685952929036e-04
  3.6951342753584296e-04  3.7735345307368976e-04  3.8509943368233887e-04  3.9274365289786601e-04  4.0027817790625137e-04
  4.0769485719671585e-04  4.1498531821505737e-04  4.2214096511660506e-04  4.2915298088824734e-04  4.3601234452610702e-04
  4.4270985619609949e-04  4.4923616287683257e-04  4.5558178400252852e-04  4.6173713710594610e-04  4.6769256346130211e-04
  4.7343835372719366e-04  4.7896477358951999e-04  4.8426208940440419e-04  4.8932059384111540e-04  4.9413063152499057e-04
  4.9868262468035635e-04  5.0296709877345090e-04  5.0697470815534631e-04  5.1069626170486984e-04  5.1412274847152618e-04
  5.1724536331841935e-04  5.2005553256517464e-04  5.2254493963086054e-04  5.2470555067691020e-04  5.2652964025004425e-04
  5.2800981692519163e-04  5.2913904894841257e-04  5.2991068987981969e-04  5.3031850423650010e-04  5.3035669313543777e-04
  5.3001991993643482e-04  5.2930333588503383e-04  5.2820260575543948e-04  5.2671393349344091e-04  5.2483408785933305e-04
  5.2256042807083891e-04  5.1989092944603127e-04  5.1682420904625506e-04  5.1335955131904859e-04  5.0949693374106593e-04
  5.0523705246099872e-04  5.0058134794249800e-04  4.9553203060709620e-04  4.9009210647712911e-04  4.8426540281865750e-04
  4.7805659378438953e-04  4.7147122605660226e-04  4.6451574449006354e-04  4.5719751775495421e-04  4.4952486397979003e-04
  4.4150707639434300e-04  4.3315444897256398e-04  4.2447830207550453e-04  4.1549100809423805e-04  4.0620601709278275e-04
  3.9663788245102293e-04  3.8680228649486342e-04  3.7671606064551235e-04  3.6639715903350844e-04  3.5586457840648613e-04
  3.4513826904126609e-04  3.3423904559410999e-04  3.2318849795097491e-04  3.1200890207776807e-04  3.0072313087060138e-04
  2.8935456500604615e-04  2.7792700379138753e-04  2.6646457601487935e-04  2.5499165079599857e-04  2.4353274843569989e-04
  2.3211245126667038e-04  2.2075531450358425e-04  2.0948577709335717e-04  1.9832807256540115e-04  1.8730613988187904e-04
  1.7644353428795909e-04  1.6576333816206961e-04  1.5528807186615366e-04  1.4503960459592353e-04  1.3503906523111548e-04
  1.2530675318574424e-04  1.1586204925835759e-04  1.0672332648229115e-04  9.7907860975922985e-05  8.9431742792927919e-05
  8.1309786772532436e-05  7.3555443389769232e-05  6.6180709605731807e-05  5.9196039717829036e-05  5.2610256210039864e-05
  4.6430460603167831e-05  4.0661944305095811e-05  3.5308099461040323e-05  3.0370329803806602e-05  2.5847961504042900e-05
  2.1738154020495130e-05  1.8035810950261437e-05  1.4733490879047110e-05  1.1821318231418668e-05  9.2868941210591527e-06
  7.1152072010220485e-06  5.2885445139862490e-06  3.7864023425109050e-06  2.5853970592893002e-06  1.6591759774043529e-06
  9.7832820058270809e-07  5.1029547344910026e-07  2.1928303178174674e-07  6.6170452766277105e-08  8.4225052509093699e-09
  0.0000000000000000e+00
  0.0000000000000000e+00  7.3389404235007291e+01  1.1023551330499035e+02  1.2155185022026326e+02  1.1773772222822080e+02
  1.0786953675973443e+02  9.8741658820121614e+01  9.4062419879609678e+01  9.4378891914286655e+01  9.7716838837985549e+01
  1.0088736784142793e+02  1.0124056329921891e+02  9.7771081677473191e+01  9.1213155596167041e+01  8.3542477190229846e+01
  7.6957044952406463e+01  7.2761042177167397e+01  7.1062079868194616e+01  7.1015549730908560e+01  7.1304636294167196e+01
  7.0805674535204744e+01  6.9057473587544180e+01  6.6238552060007052e+01  6.2952879322544376e+01  5.9916358074784483e+01
  5.7602093785889871e+01  5.6101585018857790e+01  5.5204504912583381e+01  5.4538742169218921e+01  5.3749851308855291e+01
  5.2658201132965296e+01  5.1274427241543926e+01  4.9739726589232184e+01  4.8245550881798820e+01  4.6939964363852745e+01
  4.5871203273497713e+01  4.5001288085967246e+01  4.4241316852107865e+01  4.3494592826492678e+01  4.2700498902184655e+01
  4.1848515606638379e+01  4.0965084773100195e+01  4.0094633311120973e+01  3.9277477147326550e+01  3.8531782317691793e+01
  3.7853038197779767e+01  3.7222096540513107e+01  3.6614939628099073e+01  3.6013343120011577e+01  3.5410884016960935e+01
  3.4810944342891027e+01  3.4222454332648979e+01  3.3654994106667026e+01  3.3114017300780617e+01  3.2599475827159978e+01
  3.2107412607698549e+01  3.1632098221506478e+01  3.1168404914704958e+01  3.0713676753978369e+01  3.0267719215715562e+01
  2.9831898413694109e+01  2.9408090243481514e+01  2.8997566626792143e+01  2.8600387964838543e+01  2.8215634349026452e+01
  2.7841859882545325e+01  2.7477596770295868e+01  2.7121833897969065e+01  2.6774146137907088e+01  2.6434524249065475e+01
  2.6103153660674316e+01  2.5780173624782766e+01  2.5465490387760489e+01  2.5158781226376423e+01  2.4859586816148784e+01
  2.4567415646713748e+01  2.4281851954006179e+01  2.4002613153022811e+01  2.3729525563661376e+01  2.3462478618588580e+01
  2.3201374588206907e+01  2.2946081183464177e+01  2.2696418911960606e+01  2.2452177926838036e+01  2.2213139281079236e+01
  2.1979097408388043e+01  2.1749877169146846e+01  2.1525333017326911e+01  2.1305339822372829e+01  2.1089782462690881e+01
  2.0878545017391225e+01  2.0671504935276211e+01  2.0468535290472733e+01  2.0269508997789298e+01  2.0074303240617574e+01
  1.9882803492467541e+01  1.9694904446665781e+01  1.9510508310201843e+01  1.9329522617981425e+01  1.9151857848011808e+01
  1.8977425545595711e+01  1.8806138290579476e+01  1.8637910473502725e+01  1.8472659102721604e+01  1.8310304571920156e+01
  1.8150771011628475e+01  1.7993986005465757e+01  1.7839880107394666e+01  1.7688386285953850e+01  1.7539439374336023e+01
  1.7392975877885746e+01  1.7248934079021243e+01  1.7107254152632553e+01  1.6967878256597253e+01  1.6830750571686565e+01
  1.6695817241964711e+01  1.6563026253783125e+01  1.6432327282336917e+01  1.6303671514576106e+01  1.6177011529837422e+01
  1.6052301286198020e+01  1.5929496116843650e+01  1.5808552708683884e+01  1.5689429065906671e+01  1.5572084472655046e+01
  1.5456479452430822e+01  1.5342575712486466e+01  1.5230336072414332e+01  1.5119724395923708e+01  1.5010705562398917e+01
  1.4903245449702171e+01  1.4797310906259488e+01  1.4692869712690557e+01  1.4589890547405915e+01  1.4488342964814564e+01
  1.4388197368959640e+01  1.4289424977568308e+01  1.4191997780787036e+01  1.4095888514863351e+01  1.4001070647425626e+01
  1.3907518357382717e+01  1.3815206507557457e+01  1.3724110616368252e+01  1.3634206840883291e+01  1.3545471961658588e+01
  1.3457883361878737e+01  1.3371419001285091e+01  1.3286057394390362e+01  1.3201777598773999e+01  1.3118559202013548e+01
  1.3036382303861149e+01  1.2955227495480587e+01  1.2875075844556060e+01  1.2795908884860189e+01  1.2717708602814904e+01
  1.2640457420237560e+01  1.2564138177161986e+01  1.2488734122424834e+01  1.2414228906061249e+01  1.2340606568794072e+01
  1.2267851528688754e+01  1.2195948568429158e+01  1.2124882825362901e+01  1.2054639780110204e+01  1.1985205242483309e+01
  1.1916565336606311e+01  1.1848706494370530e+01  1.1781615455815894e+01  1.1715279268617010e+01  1.1649685285600462e+01
  1.1584821157718919e+01  1.1520674817329226e+01  1.1457234455740151e+01  1.1394488498219479e+01  1.1332425578413215e+01
  1.1271034532942103e+01  1.1210304429353549e+01  1.1150224601909647e+01  1.1090784687334519e+01  1.1031974649618677e+01
  1.0973784741585639e+01  1.0916205410935394e+01  1.0859227195970934e+01  1.0802840618738696e+01  1.0747036137008861e+01
  1.0691804279824625e+01  1.0637135871356707e+01  1.0583022265210770e+01  1.0529455564715386e+01  1.0476428587973862e+01
  1.0423934421348402e+01  1.0371965860466261e+01  1.0320514832458617e+01  1.0269571952441895e+01  1.0219126959127431e+01
  1.0169169925204583e+01  1.0119692592684499e+01  1.0070689723844847e+01  1.0022159664369291e+01  9.9741024642685598e+00
  9.9265168092136147e+00  9.8793968030962400e+00  9.8327289275372660e+00  9.7864924238260098e+00  9.7406652464126164e+00
  9.6952315298152101e+00  9.6501892810841792e+00  9.6055562784961275e+00  9.5613642189521677e+00  9.5176424299212510e+00
  9.4743999085150747e+00  9.4316071673296378e+00  9.3891885511945024e+00  9.3470472997509404e+00  9.3051066514288134e+00
  9.2633528704301789e+00  9.2218758944406822e+00  9.1808644634549896e+00  9.1405265324431682e+00  9.1009893434971936e+00
  9.0621966409051087e+00  9.0238295593457245e+00  8.9853837199394047e+00  8.9463861314280226e+00  8.9066342851489093e+00
  8.8664376074178719e+00  8.8267237018236404e+00  8.7887178751740382e+00  8.7534123082729707e+00  8.7210109530082445e+00
  8.6903958620903978e+00  8.6590550744180383e+00  8.6237765740445198e+00  8.5815492872884427e+00  8.5304907429474177e+00
  8.4707983776493183e+00  8.4057244863409757e+00  8.3425748179143842e+00  8.2937308159703491e+00  8.6844243032517277e+00
  8.6305022256225197e+00  8.5752958131495483e+00  8.5188036966531353e+00  8.4610266758420831e+00  8.4019676937373671e+00
  8.3416318094134319e+00  8.2800261690571517e+00  8.2171599753444013e+00  8.1530444551342569e+00  8.0876928254808558e+00
  8.0211202579628615e+00  7.9533438413305761e+00  7.8843825424706804e+00  7.8142571656886082e+00  7.7429903103085591e+00
  7.6706063265911304e+00  7.5971312699685916e+00  7.5225928535977982e+00  7.4470203992307225e+00  7.3704447864026257e+00
  7.2928983999378634e+00  7.2144150757733234e+00  7.1350300450995015e+00  7.0547798768191869e+00  6.9737024183238203e+00
  6.8918367345874438e+00  6.8092230455783129e+00  6.7259026619881297e+00  6.6419179192789031e+00  6.5573121100474578e+00
  6.4721294147075605e+00  6.3864148304896897e+00  6.3002140987584285e+00  6.2135736306475025e+00  6.1265404310124412e+00
  6.0391620207008723e+00  5.9514863571404542e+00  5.8635617532444391e+00  5.7754367946348681e+00  5.6871602551833966e+00
  5.5987810108697582e+00  5.5103479519578586e+00  5.4219098934895031e+00  5.3335154840957530e+00  5.2452131131259199e+00
  5.1570508160941921e+00  5.0690761784438925e+00  4.9813362376293657e+00  4.8938773835155098e+00  4.8067452570949243e+00
  4.7199846475227059e+00  4.6336393874688637e+00  4.5477522467883880e+00  4.4623648245335739e+00  4.3775174458869826e+00
  4.2932491064052165e+00  4.2095974662836300e+00  4.1265988525206652e+00  4.0442882617392275e+00  3.9626993636305881e+00
  3.8818645050208227e+00  3.8018147145597596e+00  3.7225797080324718e+00  3.6441878942932764e+00  3.5666663818222721e+00
  3.4900409859043982e+00  3.4143362364310157e+00  3.3395753863240198e+00  3.2657804205824754e+00  3.1929720659517740e+00
  3.1211698012153257e+00  3.0503918681087634e+00  2.9806552828566875e+00  2.9119758483319229e+00  2.8443681668373091e+00
  2.7778456535100147e+00  2.7124205503483734e+00  2.6481039408612519e+00  2.5849057653399345e+00  2.5228348367525499e+00
  2.4618988572609970e+00  2.4021044353604211e+00  2.3434571036412022e+00  2.2859613371734739e+00  2.2296205725141660e+00
  2.1744372273365715e+00  2.1204127206824404e+00  2.0675474938366007e+00  2.0158410318241011e+00  1.9652918855298824e+00
  1.9158976944409707e+00  1.8676552100112038e+00  1.8205603196484703e+00  1.7746080713244892e+00  1.7297926988071013e+00
  1.6861076475150958e+00  1.6435456009955578e+00  1.6020985080237422e+00  1.5617576103254711e+00  1.5225134709220636e+00
  1.4843560030977798e+00  1.4472744999898037e+00  1.4112576648007367e+00  1.3762936416336331e+00  1.3423700469495430e+00
  1.3094740016475970e+00  1.2775921637676078e+00  1.2467107618151969e+00  1.2168156284499803e+00  1.1878922291598668e+00
  1.1599256787038184e+00  1.1329007533816531e+00  1.1068019033877767e+00  1.0816132653885939e+00  1.0573186753236008e+00
  1.0339016814301571e+00  1.0113455574919366e+00  9.8963331631105944e-01  9.6874772340390480e-01  9.4867131092060197e-01
  9.2938639178820259e-01  9.1087507407753199e-01  8.9311927559372206e-01  8.7610073869042326e-01  8.5980104530769552e-01
  8.4420163223358136e-01  8.2928380658935807e-01  8.1502876153846882e-01  8.0141759221913578e-01  7.8843131190065252e-01
  7.7605086836335502e-01  7.6425716050227499e-01  7.5303105515447144e-01  7.4235340415004414e-01  7.3220506158682452e-01
  7.2256690132874912e-01  7.1341983472791148e-01  7.0474482857029441e-01  6.9652292324518339e-01  6.8873525113825829e-01
  6.8136305524836582e-01  6.7438770802797232e-01  6.6779073044729698e-01  6.6155381128212309e-01  6.5565882662529207e-01
  6.5008785962187554e-01  6.4482322042802775e-01  6.3984746639351886e-01  6.3514342246794786e-01  6.3069420183063418e-01
  6.2648322674419221e-01  6.2249424963178313e-01  6.1871137437804802e-01  6.1511907785372055e-01  6.1170223166392090e-01
  6.0844612412012733e-01  6.0533648243583049e-01  6.0235949514586551e-01  5.9950183474942598e-01  5.9675068057675673e-01
  5.9409374187952624e-01  5.9151928114488028e-01  5.8901613760383964e-01  5.8657374788143524e-01  5.8418215065214329e-01
  5.8183197867872716e-01  5.7951444932050555e-01  5.7722135477218794e-01  5.7494505203494584e-01  5.7267845261971861e-01
  5.7041501198275457e-01  5.6814871869338779e-01  5.6587408333404898e-01  5.6358612713251310e-01  5.6128037032638045e-01
  5.5895282025979476e-01  5.5659995921239458e-01  5.5421873196050142e-01  5.5180653307054250e-01  5.4936119392470772e-01
  5.4688096947884424e-01  5.4436452475258335e-01  5.4181092105170459e-01  5.3921960192273466e-01  5.3659037883978022e-01
  5.3392341662359810e-01  5.3121921859289878e-01  5.2847861144788588e-01  5.2570272988603062e-01  5.2289300095008218e-01
  5.2005112810831167e-01  5.1717907506699312e-01  5.1427904931511859e-01  5.1135348540134784e-01  5.0840502794319564e-01
  5.0543651436845116e-01  5.0245095738883461e-01  4.9945152720588848e-01  4.9644153344910424e-01  4.9342440684628341e-01
  4.9040368062613460e-01  4.8738297165310568e-01  4.8436596129445086e-01  4.8135637601953279e-01  4.7835796773136052e-01
  4.7537449383036207e-01  4.7240969701039204e-01  4.6946728478697541e-01  4.6655090875778527e-01  4.6366414359535651e-01
  4.6081046577203438e-01  4.5799323201715852e-01  4.5521565750648202e-01  4.5248079378382522e-01  4.4979150641496590e-01
  4.4715045237376294e-01  4.4456005716063401e-01  4.4202249229402707e-01  4.3953966156791463e-01  4.3711320238198187e-01
  4.3474449104319618e-01  4.3243464824700617e-01  4.3018454466826850e-01  4.2799480666190332e-01  4.2586582207327706e-01
  4.2379774615831378e-01  4.2179050761333370e-01  4.1984381471462062e-01  4.1795716156771667e-01  4.1612983446644514e-01
  4.1436091836166172e-01  4.1264930343973300e-01  4.1099369181074374e-01  4.0939260430643137e-01  4.0784438738784878e-01
  4.0634722016275548e-01  4.0489912151273594e-01  4.0349795733004673e-01  4.0214144786419093e-01  4.0082717517822086e-01
  3.9955259071476890e-01  3.9831502297180610e-01  3.9711168528812862e-01  3.9593968373857263e-01  3.9479602513895662e-01
  3.9367762516075211e-01  3.9258131655548206e-01  3.9150385748884753e-01  3.9044193998458188e-01  3.8939219847803364e-01
  3.8835121847947657e-01  3.8731554534714813e-01  3.8628169317001615e-01  3.8524615376027294e-01  3.8420540575555751e-01
  3.8315592383090608e-01  3.8209418802043060e-01  3.8101669314872427e-01  3.7991995837199677e-01  3.7880053682893544e-01
  3.7765502540129642e-01  3.7648007458422222e-01  3.7527239846628802e-01  3.7402878481927576e-01  3.7274610529767638e-01
  3.7142132574791981e-01  3.7005151662733293e-01  3.6863386353282573e-01  3.6716567783930532e-01  3.6564440744781751e-01
  3.6406764764341759e-01  3.6243315202601406e-01  3.6073884161750858e-01  3.5898280671444605e-01  3.5716330447793093e-01
  3.5527875618129667e-01  3.5332774440533032e-01  3.5130901018109528e-01  3.4922145008035071e-01  3.4706411325356784e-01
  3.4483619841554364e-01  3.4253705077861141e-01  3.4016615893344831e-01  3.3772315167748035e-01  3.3520779479088403e-01
  3.3261998776018492e-01  3.2995976044945424e-01  3.2722726971910115e-01  3.2442279599226337e-01  3.2154673976879372e-01
  3.1859961808684484e-01  3.1558206093204988e-01  3.1249480759430148e-01  3.0933870297212646e-01  3.0611469382465856e-01
  3.0282382497120791e-01  2.9946723543842751e-01  2.9604615455507705e-01  2.9256189799438320e-01  2.8901586376399763e-01
  2.8540952814355181e-01  2.8174444156980882e-01  2.7802222446941216e-01  2.7424456303923200e-01  2.7041320497430787e-01
  2.6652995514338923e-01  2.6259667121207220e-01  2.5861525921353412e-01  2.5458766906686475e-01  2.5051589004299457e-01
  2.4640194617822023e-01  2.4224789163532728e-01  2.3805580601230933e-01  2.3382778959868494e-01  2.2956595857941126e-01
  2.2527244018639478e-01  2.2094936779759905e-01  2.1659887598374966e-01  2.1222309550263604e-01  2.0782414824101067e-01
  2.0340414210408497e-01  1.9896516585262244e-01  1.9450928388762898e-01  1.9003853098263995e-01  1.8555490696360455e-01
  1.8106037133672642e-01  1.7655683810213771e-01  1.7204617278548992e-01  1.6753019230501778e-01  1.6301066537487122e-01
  1.5848931292315044e-01  1.5396780851994935e-01  1.4944777881540766e-01  1.4493080398777136e-01  1.4041841820146195e-01
  1.3591211007515400e-01  1.3141332315986123e-01  1.2692345642703140e-01  1.2244386476664947e-01  1.1797585949534931e-01
  1.1352070887453405e-01  1.0907963863850498e-01  1.0465383253259887e-01  1.0024443286133390e-01  9.5852541046564071e-02
  9.1479218195642240e-02  8.7125485679591594e-02  8.2792325721285767e-02  7.8480681993637322e-02  7.4191460227794936e-02
  6.9925528831349074e-02  6.5683719516546113e-02  6.1466827938511111e-02  5.7275614343479081e-02  5.3110804227034680e-02
  4.8973089002360699e-02  4.4863126678494798e-02  4.0781542548594923e-02  3.6728929888213240e-02  3.2705850663578707e-02
  2.8712836249887880e-02  2.4750388159604571e-02  2.0818978780767914e-02  1.6919052125308955e-02  1.3051024587375743e-02
  9.2152857116670692e-03  5.4121989717746356e-03  1.6421025585338363e-03 -2.0946898216170642e-03 -5.7978881382690058e-03
 -9.4672252186658607e-03 -1.3102455919319439e-02 -1.6703356287616308e-02 -2.0269722713415615e-02 -2.3801371070638632e-02
 -2.7298135848849939e-02 -3.0759869274829623e-02 -3.4186440424137370e-02 -3.7577734322667651e-02 -4.0933651038196767e-02
 -4.4254104766227279e-02 -4.7539023036144344e-02 -5.0788346271815374e-02 -5.4002027503956718e-02 -5.7180032085787008e-02
 -6.0322337405054320e-02 -6.3428932592437051e-02 -6.6499818226318813e-02 -6.9535006033936989e-02 -7.2534518588905125e-02
 -7.5498389005109273e-02 -7.8426660626978006e-02 -8.1319386716126318e-02 -8.4176630134373417e-02 -8.6998463023134173e-02
 -8.9784966479184519e-02 -9.2536230226800895e-02 -9.5252352286272587e-02 -9.7933438638789228e-02 -1.0057960288770121e-01
 -1.0319096591615413e-01 -1.0576765554109729e-01 -1.0830980616366551e-01 -1.1081755841593534e-01 -1.1329105880405471e-01
 -1.1573045934774662e-01 -1.1813591721618637e-01 -1.2050759436025305e-01 -1.2284565714115440e-01 -1.2515027595542577e-01
 -1.2742162485630290e-01 -1.2965988117146832e-01 -1.3186522511717175e-01 -1.3403783940872435e-01 -1.3617790886736664e-01
 -1.3828562002351033e-01 -1.4036116071635402e-01 -1.4240471968987256e-01 -1.4441648618518046e-01 -1.4639664952926895e-01
 -1.4834539872011690e-01 -1.5026292200817556e-01 -1.5214940647422726e-01 -1.5400503760361764e-01 -1.5582999885686202e-01
 -1.5762447123662540e-01 -1.5938863285107621e-01 -1.6112265847361432e-01 -1.6282671909897223e-01 -1.6450098149569051e-01
 -1.6614560775496709e-01 -1.6776075483588004e-01 -1.6934657410698456e-01 -1.7090321088428351e-01 -1.7243080396581706e-01
 -1.7392948521020116e-01 -1.7539937942774655e-01 -1.7684060457018771e-01 -1.7825327196203009e-01 -1.7963748653463130e-01
 -1.8099334706288381e-01 -1.8232094640449834e-01 -1.8362037174188897e-01 -1.8489170482665918e-01 -1.8613502222668921e-01
 -1.8735039557582478e-01 -1.8853789182616684e-01 -1.8969757350296265e-01 -1.9082949896209811e-01 -1.9193372265019121e-01
 -1.9301029536728684e-01 -1.9405926453215286e-01 -1.9508067445017721e-01 -1.9607456658386635e-01 -1.9704097982594507e-01
 -1.9797995077505728e-01 -1.9889151401406824e-01 -1.9977570239096779e-01 -2.0063254730237520e-01 -2.0146207897964485e-01
 -2.0226432677757325e-01 -2.0303931946570741e-01 -2.0378708552225447e-01 -2.0450765343059230e-01 -2.0520105197838157e-01
 -2.0586731055927890e-01 -2.0650645947725144e-01 -2.0711853025349247e-01 -2.0770355593593834e-01 -2.0826157141138660e-01
 -2.0879261372021535e-01 -2.0929672237370395e-01 -2.0977393967395475e-01 -2.1022431103641620e-01 -2.1064788531500719e-01
 -2.1104471512984252e-01 -2.1141485719755967e-01 -2.1175837266424682e-01 -2.1207532744097213e-01 -2.1236579254191404e-01
 -2.1262984442509311e-01 -2.1286756533570481e-01 -2.1307904365205382e-01 -2.1326437423408923e-01 -2.1342365877454134e-01
 -2.1355700615265924e-01 -2.1366453279055023e-01 -2.1374636301211980e-01 -2.1380262940461331e-01 -2.1383347317441972e-01
 -2.1383904434773765e-01 -2.1381950164676794e-01 -2.1377501226047949e-01 -2.1370575161027475e-01 -2.1361190311334310e-01
 -2.1349365794370201e-01 -2.1335121479092600e-01 -2.1318477961656379e-01 -2.1299456540824302e-01 -2.1278079193146296e-01
 -2.1254368547907512e-01 -2.1228347861845179e-01 -2.1200040993634239e-01 -2.1169472378141754e-01 -2.1136667000450141e-01
 -2.1101650369649153e-01 -2.1064448492396681e-01 -2.1025087846248328e-01 -2.0983595352755754e-01 -2.0939998350333855e-01
 -2.0894324566896683e-01 -2.0846602092262187e-01 -2.0796859350325719e-01 -2.0745125071002340e-01 -2.0691428261937919e-01
 -2.0635798179989001e-01 -2.0578264302471486e-01 -2.0518856298178084e-01 -2.0457603998164545e-01 -2.0394537366304707e-01
 -2.0329686469614314e-01 -2.0263081448343612e-01 -2.0194752485838766e-01 -2.0124729778172012e-01 -2.0053043503540666e-01
 -1.9979723791434859e-01 -1.9904800691574095e-01 -1.9828304142612585e-01 -1.9750263940613363e-01 -1.9670709707291215e-01
 -1.9589670858024366e-01 -1.9507176569634979e-01 -1.9423255747938409e-01 -1.9337936995061297e-01 -1.9251248576528404e-01
 -1.9163218388118253e-01 -1.9073873922487561e-01 -1.8983242235564446e-01 -1.8891349912710451e-01 -1.8798223034651318e-01
 -1.8703887143176573e-01 -1.8608367206607895e-01 -1.8511687585036277e-01 -1.8413871995385489e-01 -1.8314943481040263e-01
 -1.8214924404023317e-01 -1.8113836453304527e-01 -1.8011700654679527e-01 -1.7908537380763659e-01 -1.7804366361100191e-01
 -1.7699206692382760e-01 -1.7593076848792094e-01 -1.7485994692446941e-01 -1.7377977483969298e-01 -1.7269041893163847e-01
 -1.7159204009811657e-01 -1.7048479354578142e-01 -1.6936882890035235e-01 -1.6824429031797869e-01 -1.6711131659774645e-01
 -1.6597004129532780e-01 -1.6482059283777312e-01 -1.6366309463944528e-01 -1.6249766521909667e-01 -1.6132441831808839e-01
 -1.6014346301975230e-01 -1.5895490386989539e-01 -1.5775884099844642e-01 -1.5655537024224558e-01 -1.5534458326897599e-01
 -1.5412656770223826e-01 -1.5290140724776710e-01 -1.5166918182079081e-01 -1.5042996767453284e-01 -1.4918383752985623e-01
 -1.4793086070605024e-01 -1.4667110325275962e-01 -1.4540462808305638e-01 -1.4413149510765391e-01 -1.4285176137026381e-01
 -1.4156548118409501e-01 -1.4027270626949531e-01 -1.3897348589273578e-01 -1.3766786700593722e-01 -1.3635589438813950e-01
 -1.3503761078751289e-01 -1.3371305706471243e-01 -1.3238227233737437e-01 -1.3104529412575547e-01 -1.2970215849951422e-01
 -1.2835290022563525e-01 -1.2699755291749565e-01 -1.2563614918507413e-01 -1.2426872078630247e-01 -1.2289529877955961e-01
 -1.2151591367730803e-01 -1.2013059560087286e-01 -1.1873937443636604e-01 -1.1734227999855718e-01 -1.1593934228060840e-01
 -1.1453059183612205e-01 -1.1311606019435916e-01 -1.1169578027885660e-01 -1.1026978682899366e-01 -1.0883811682450789e-01
 -1.0740080991296055e-01 -1.0595790884015127e-01 -1.0450945988348233e-01 -1.0305551328827216e-01 -1.0159612370701844e-01
 -1.0013135064161047e-01 -9.8661258888491032e-02 -9.7185918986767622e-02 -9.5705407669273157e-02 -9.4219808316576004e-02
 -9.2729211413939569e-02 -9.1233715011231134e-02 -8.9733425185780161e-02 -8.8228456508186184e-02 -8.6718932511075750e-02
 -8.5204986160809223e-02 -8.3686760332136637e-02 -8.2164408285803056e-02 -8.0638094149103584e-02 -7.9107993399387386e-02
 -7.7574293350511470e-02 -7.6037193642243678e-02 -7.4496906732615276e-02 -7.2953658393222709e-02 -7.1407688207478962e-02
 -6.9859250071814330e-02 -6.8308612699826535e-02 -6.6756060129380207e-02 -6.5201892232655961e-02 -6.3646425229148693e-02
 -6.2089992201615457e-02 -6.0532943614972606e-02 -5.8975647838142464e-02 -5.7418491668849346e-02 -5.5861880861365044e-02
 -5.4306240657203658e-02 -5.2752016318765929e-02 -5.1199673665932928e-02 -4.9649699615609125e-02 -4.8102602724215016e-02
 -4.6558913733128975e-02 -4.5019186117078711e-02 -4.3483996635481914e-02 -4.1953945886736621e-02 -4.0429658865460669e-02
 -3.8911785522680792e-02 -3.7401001328971048e-02 -3.5898007831985025e-02 -3.4403532841222641e-02 -3.2918329317215958e-02
 -3.1443173564471856e-02 -2.9978863369861667e-02 -2.8526216127788724e-02 -2.7086066952135810e-02 -2.5659266774992411e-02
 -2.4246680432161820e-02 -2.2849184735448034e-02 -2.1467666531722586e-02 -2.0103020748771121e-02 -1.8756148427919863e-02
 -1.7427954743441890e-02 -1.6119347008743276e-02 -1.4831232669329054e-02 -1.3564517282549017e-02 -1.2320102484123369e-02
 -1.1098883941448198e-02 -9.9017492936807998e-03 -8.7295760786048511e-03 -7.5832296462753791e-03 -6.4635610594436285e-03
 -5.3714049807617121e-03 -4.3075775467671350e-03 -3.2728742286471427e-03 -2.2680676797829048e-03 -1.2939055700735616e-03
 -3.5110840704008549e-04  5.5963265629104875e-04  1.4376580267242648e-03  2.2823418894515435e-03  3.0930944398291664e-03
  3.8693641283747133e-03  4.6106399189840934e-03  5.3164535603688751e-03  5.9863818707136616e-03  6.6200490355537139e-03
  7.2171289188726669e-03  7.7773473874204789e-03  8.3004846482514581e-03  8.7863775994825258e-03  9.2349221942716157e-03
  9.6460758180162056e-03  1.0019859678772062e-02  1.0356361210892074e-02  1.0655736491885379e-02  1.0918212672496451e-02
  1.1144090420004579e-02  1.1333746374743318e-02  1.1487635619840180e-02  1.1606294164176535e-02  1.1690341438567562e-02
  1.1740482805162449e-02  1.1757512079202370e-02  1.1742313693408061e-02  1.1695861723464641e-02  1.1619215265459604e-02
  1.1513513171082320e-02  1.1379968742695474e-02  1.1219864392450611e-02  1.1034546265447788e-02  1.0825418826939312e-02
  1.0593939413577594e-02  1.0341612748707105e-02  1.0069985421700418e-02  9.7806403313383718e-03  9.4751910932343187e-03
  9.1552764113024925e-03  8.8225544132704559e-03  8.4786969502356688e-03  8.1253838602661464e-03  7.7642971960452277e-03
  7.3971154165604364e-03  7.0255075428364549e-03  6.6511272777121828e-03  6.2756070896619167e-03  5.9005522606606180e-03
  5.5275348980932870e-03  5.1580879107084405e-03  4.7936989486156859e-03  4.4358043073274038e-03  4.0857827958445201e-03
  3.7449495687863986e-03  3.4145499225648208e-03  3.0957530556020591e-03  2.7896457925930870e-03  2.4972262728118495e-03
  2.2193976024616597e-03  1.9569614710696829e-03  1.7106117319255487e-03  1.4809279465640218e-03  1.2683688932918146e-03
  1.0732660397584854e-03  8.9581697957142703e-04  7.3607883295497846e-04  5.9396161145361989e-04  4.6922154667930341e-04
  3.6145438310281015e-04  2.7008863488929942e-04  1.9437880677790817e-04  1.3339857900545387e-04  8.6033956274253029e-05
  5.0976380764045268e-05  2.6715809187986458e-05  1.1533753892786951e-05  3.4962880029269875e-06  4.4701460897647982e-07
  0.0000000000000000e+00
  0.0000000000000000e+00  7.3389404235007291e+01  1.1023551330499035e+02  1.2155185022026326e+02  1.1773772222822080e+02
  1.0786953675973443e+02  9.8741658820121614e+01  9.4062419879609678e+01  9.4378891914286655e+01  9.7716838837985549e+01
  1.0088736784142793e+02  1.0124056329921891e+02  9.7771081677473191e+01  9.1213155596167041e+01  8.3542477190229846e+01
  7.6957044952406463e+01  7.2761042177167397e+01  7.1062079868194616e+01  7.1015549730908560e+01  7.1304636294167196e+01
  7.0805674535204744e+01  6.9057473587544180e+01  6.6238552060007052e+01  6.2952879322544376e+01  5.9916358074784483e+01
  5.7602093785889871e+01  5.6101585018857790e+01  5.5204504912583381e+01  5.4538742169218921e+01  5.3749851308855291e+01
  5.2658201132965296e+01  5.1274427241543926e+01  4.9739726589232184e+01  4.8245550881798820e+01  4.6939964363852745e+01
  4.5871203273497713e+01  4.5001288085967246e+01  4.4241316852107865e+01  4.3494592826492678e+01  4.2700498902184655e+01
  4.1848515606638379e+01  4.0965084773100195e+01  4.0094633311120973e+01  3.9277477147326550e+01  3.8531782317691793e+01
  3.7853038197779767e+01  3.7222096540513107e+01  3.6614939628099073e+01  3.6013343120011577e+01  3.5410884016960935e+01
  3.4810944342891027e+01  3.4222454332648979e+01  3.3654994106667026e+01  3.3114017300780617e+01  3.2599475827159978e+01
  3.2107412607698549e+01  3.1632098221506478e+01  3.1168404914704958e+01  3.0713676753978369e+01  3.0267719215715562e+01
  2.9831898413694109e+01  2.9408090243481514e+01  2.8997566626792143e+01  2.8600387964838543e+01  2.8215634349026452e+01
  2.7841859882545325e+01  2.7477596770295868e+01  2.7121833897969065e+01  2.6774146137907088e+01  2.6434524249065475e+01
  2.6103153660674316e+01  2.5780173624782766e+01  2.5465490387760489e+01  2.5158781226376423e+01  2.4859586816148784e+01
  2.4567415646713748e+01  2.4281851954006179e+01  2.4002613153022811e+01  2.3729525563661376e+01  2.3462478618588580e+01
  2.3201374588206907e+01  2.2946081183464177e+01  2.2696418911960606e+01  2.2452177926838036e+01  2.2213139281079236e+01
  2.1979097408388043e+01  2.1749877169146846e+01  2.1525333017326911e+01  2.1305339822372829e+01  2.1089782462690881e+01
  2.0878545017391225e+01  2.0671504935276211e+01  2.0468535290472733e+01  2.0269508997789298e+01  2.0074303240617574e+01
  1.9882803492467541e+01  1.9694904446665781e+01  1.9510508310201843e+01  1.9329522617981425e+01  1.9151857848011808e+01
  1.8977425545595711e+01  1.8806138290579476e+01  1.8637910473502725e+01  1.8472659102721604e+01  1.8310304571920156e+01
  1.8150771011628475e+01  1.7993986005465757e+01  1.7839880107394666e+01  1.7688386285953850e+01  1.7539439374336023e+01
  1.7392975877885746e+01  1.7248934079021243e+01  1.7107254152632553e+01  1.6967878256597253e+01  1.6830750571686565e+01
  1.6695817241964711e+01  1.6563026253783125e+01  1.6432327282336917e+01  1.6303671514576106e+01  1.6177011529837422e+01
  1.6052301286198020e+01  1.5929496116843650e+01  1.5808552708683884e+01  1.5689429065906671e+01  1.5572084472655046e+01
  1.5456479452430822e+01  1.5342575712486466e+01  1.5230336072414332e+01  1.5119724395923708e+01  1.5010705562398917e+01
  1.4903245449702171e+01  1.4797310906259488e+01  1.4692869712690557e+01  1.4589890547405915e+01  1.4488342964814564e+01
  1.4388197368959640e+01  1.4289424977568308e+01  1.4191997780787036e+01  1.4095888514863351e+01  1.4001070647425626e+01
  1.3907518357382717e+01  1.3815206507557457e+01  1.3724110616368252e+01  1.3634206840883291e+01  1.3545471961658588e+01
  1.3457883361878737e+01  1.3371419001285091e+01  1.3286057394390362e+01  1.3201777598773999e+01  1.3118559202013548e+01
  1.3036382303861149e+01  1.2955227495480587e+01  1.2875075844556060e+01  1.2795908884860189e+01  1.2717708602814904e+01
  1.2640457420237560e+01  1.2564138177161986e+01  1.2488734122424834e+01  1.2414228906061249e+01  1.2340606568794072e+01
  1.2267851528688754e+01  1.2195948568429158e+01  1.2124882825362901e+01  1.2054639780110204e+01  1.1985205242483309e+01
  1.1916565336606311e+01  1.1848706494370530e+01  1.1781615455815894e+01  1.1715279268617010e+01  1.1649685285600462e+01
  1.1584821157718919e+01  1.1520674817329226e+01  1.1457234455740151e+01  1.1394488498219479e+01  1.1332425578413215e+01
  1.1271034532942103e+01  1.1210304429353549e+01  1.1150224601909647e+01  1.1090784687334519e+01  1.1031974649618677e+01
  1.0973784741585639e+01  1.0916205410935394e+01  1.0859227195970934e+01  1.0802840618738696e+01  1.0747036137008861e+01
  1.0691804279824625e+01  1.0637135871356707e+01  1.0583022265210770e+01  1.0529455564715386e+01  1.0476428587973862e+01
  1.0423934421348402e+01  1.0371965860466261e+01  1.0320514832458617e+01  1.0269571952441895e+01  1.0219126959127431e+01
  1.0169169925204583e+01  1.0119692592684499e+01  1.0070689723844847e+01  1.0022159664369291e+01  9.9741024642685598e+00
  9.9265168092136147e+00  9.8793968030962400e+00  9.8327289275372660e+00  9.7864924238260098e+00  9.7406652464126164e+00
  9.6952315298152101e+00  9.6501892810841792e+00  9.6055562784961275e+00  9.5613642189521677e+00  9.5176424299212510e+00
  9.4743999085150747e+00  9.4316071673296378e+00  9.3891885511945024e+00  9.3470472997509404e+00  9.3051066514288134e+00
  9.2633528704301789e+00  9.2218758944406822e+00  9.1808644634549896e+00  9.1405265324431682e+00  9.1009893434971936e+00
  9.0621966409051087e+00  9.0238295593457245e+00  8.9853837199394047e+00  8.9463861314280226e+00  8.9066342851489093e+00
  8.8664376074178719e+00  8.8267237018236404e+00  8.7887178751740382e+00  8.7534123082729707e+00  8.7210109530082445e+00
  8.6903958620903978e+00  8.6590550744180383e+00  8.6237765740445198e+00  8.5815492872884427e+00  8.5304907429474177e+00
  8.4707983776493183e+00  8.4057244863409757e+00  8.3425748179143842e+00  8.2937308159703491e+00  8.6844243032517277e+00
  8.6305022256225197e+00  8.5752958131495483e+00  8.5188036966531353e+00  8.4610266758420831e+00  8.4019676937373671e+00
  8.3416318094134319e+00  8.2800261690571517e+00  8.2171599753444013e+00  8.1530444551342569e+00  8.0876928254808558e+00
  8.0211202579628615e+00  7.9533438413305761e+00  7.8843825424706804e+00  7.8142571656886082e+00  7.7429903103085591e+00
  7.6706063265911304e+00  7.5971312699685916e+00  7.5225928535977982e+00  7.4470203992307225e+00  7.3704447864026257e+00
  7.2928983999378634e+00  7.2144150757733234e+00  7.1350300450995015e+00  7.0547798768191869e+00  6.9737024183238203e+00
  6.8918367345874438e+00  6.8092230455783129e+00  6.7259026619881297e+00  6.6419179192789031e+00  6.5573121100474578e+00
  6.4721294147075605e+00  6.3864148304896897e+00  6.3002140987584285e+00  6.2135736306475025e+00  6.1265404310124412e+00
  6.0391620207008723e+00  5.9514863571404542e+00  5.8635617532444391e+00  5.7754367946348681e+00  5.6871602551833966e+00
  5.5987810108697582e+00  5.5103479519578586e+00  5.4219098934895031e+00  5.3335154840957530e+00  5.2452131131259199e+00
  5.1570508160941921e+00  5.0690761784438925e+00  4.9813362376293657e+00  4.8938773835155098e+00  4.8067452570949243e+00
  4.7199846475227059e+00  4.6336393874688637e+00  4.5477522467883880e+00  4.4623648245335739e+00  4.3775174458869826e+00
  4.2932491064052165e+00  4.2095974662836300e+00  4.1265988525206652e+00  4.0442882617392275e+00  3.9626993636305881e+00
  3.8818645050208227e+00  3.8018147145597596e+00  3.7225797080324718e+00  3.6441878942932764e+00  3.5666663818222721e+00
  3.4900409859043982e+00  3.4143362364310157e+00  3.3395753863240198e+00  3.2657804205824754e+00  3.1929720659517740e+00
  3.1211698012153257e+00  3.0503918681087634e+00  2.9806552828566875e+00  2.9119758483319229e+00  2.8443681668373091e+00
  2.7778456535100147e+00  2.7124205503483734e+00  2.6481039408612519e+00  2.5849057653399345e+00  2.5228348367525499e+00
  2.4618988572609970e+00  2.4021044353604211e+00  2.3434571036412022e+00  2.2859613371734739e+00  2.2296205725141660e+00
  2.1744372273365715e+00  2.1204127206824404e+00  2.0675474938366007e+00  2.0158410318241011e+00  1.9652918855298824e+00
  1.9158976944409707e+00  1.8676552100112038e+00  1.8205603196484703e+00  1.7746080713244892e+00  1.7297926988071013e+00
  1.6861076475150958e+00  1.6435456009955578e+00  1.6020985080237422e+00  1.5617576103254711e+00  1.5225134709220636e+00
  1.4843560030977798e+00  1.4472744999898037e+00  1.4112576648007367e+00  1.3762936416336331e+00  1.3423700469495430e+00
  1.3094740016475970e+00  1.2775921637676078e+00  1.2467107618151969e+00  1.2168156284499803e+00  1.1878922291598668e+00
  1.1599256787038184e+00  1.1329007533816531e+00  1.1068019033877767e+00  1.0816132653885939e+00  1.0573186753236008e+00
  1.0339016814301571e+00  1.0113455574919366e+00  9.8963331631105944e-01  9.6874772340390480e-01  9.4867131092060197e-01
  9.2938639178820259e-01  9.1087507407753199e-01  8.9311927559372206e-01  8.7610073869042326e-01  8.5980104530769552e-01
  8.4420163223358136e-01  8.2928380658935807e-01  8.1502876153846882e-01  8.0141759221913578e-01  7.8843131190065252e-01
  7.7605086836335502e-01  7.6425716050227499e-01  7.5303105515447144e-01  7.4235340415004414e-01  7.3220506158682452e-01
  7.2256690132874912e-01  7.1341983472791148e-01  7.0474482857029441e-01  6.9652292324518339e-01  6.8873525113825829e-01
  6.8136305524836582e-01  6.7438770802797232e-01  6.6779073044729698e-01  6.6155381128212309e-01  6.5565882662529207e-01
  6.5008785962187554e-01  6.4482322042802775e-01  6.3984746639351886e-01  6.3514342246794786e-01  6.3069420183063418e-01
  6.2648322674419221e-01  6.2249424963178313e-01  6.1871137437804802e-01  6.1511907785372055e-01  6.1170223166392090e-01
  6.0844612412012733e-01  6.0533648243583049e-01  6.0235949514586551e-01  5.9950183474942598e-01  5.9675068057675673e-01
  5.9409374187952624e-01  5.9151928114488028e-01  5.8901613760383964e-01  5.8657374788143524e-01  5.8418215065214329e-01
  5.8183197867872716e-01  5.7951444932050555e-01  5.7722135477218794e-01  5.7494505203494584e-01  5.7267845261971861e-01
  5.7041501198275457e-01  5.6814871869338779e-01  5.6587408333404898e-01  5.6358612713251310e-01  5.6128037032638045e-01
  5.5895282025979476e-01  5.5659995921239458e-01  5.5421873196050142e-01  5.5180653307054250e-01  5.4936119392470772e-01
  5.4688096947884424e-01  5.4436452475258335e-01  5.4181092105170459e-01  5.3921960192273466e-01  5.3659037883978022e-01
  5.3392341662359810e-01  5.3121921859289878e-01  5.2847861144788588e-01  5.2570272988603062e-01  5.2289300095008218e-01
  5.2005112810831167e-01  5.1717907506699312e-01  5.1427904931511859e-01  5.1135348540134784e-01  5.0840502794319564e-01
  5.0543651436845116e-01  5.0245095738883461e-01  4.9945152720588848e-01  4.9644153344910424e-01  4.9342440684628341e-01
  4.9040368062613460e-01  4.8738297165310568e-01  4.8436596129445086e-01  4.8135637601953279e-01  4.7835796773136052e-01
  4.7537449383036207e-01  4.7240969701039204e-01  4.6946728478697541e-01  4.6655090875778527e-01  4.6366414359535651e-01
  4.6081046577203438e-01  4.5799323201715852e-01  4.5521565750648202e-01  4.5248079378382522e-01  4.4979150641496590e-01
  4.4715045237376294e-01  4.4456005716063401e-01  4.4202249229402707e-01  4.3953966156791463e-01  4.3711320238198187e-01
  4.3474449104319618e-01  4.3243464824700617e-01  4.3018454466826850e-01  4.2799480666190332e-01  4.2586582207327706e-01
  4.2379774615831378e-01  4.2179050761333370e-01  4.1984381471462062e-01  4.1795716156771667e-01  4.1612983446644514e-01
  4.1436091836166172e-01  4.1264930343973300e-01  4.1099369181074374e-01  4.0939260430643137e-01  4.0784438738784878e-01
  4.0634722016275548e-01  4.0489912151273594e-01  4.0349795733004673e-01  4.0214144786419093e-01  4.0082717517822086e-01
  3.9955259071476890e-01  3.9831502297180610e-01  3.9711168528812862e-01  3.9593968373857263e-01  3.9479602513895662e-01
  3.9367762516075211e-01  3.9258131655548206e-01  3.9150385748884753e-01  3.9044193998458188e-01  3.8939219847803364e-01
  3.8835121847947657e-01  3.8731554534714813e-01  3.8628169317001615e-01  3.8524615376027294e-01  3.8420540575555751e-01
  3.8315592383090608e-01  3.8209418802043060e-01  3.8101669314872427e-01  3.7991995837199677e-01  3.7880053682893544e-01
  3.7765502540129642e-01  3.7648007458422222e-01  3.7527239846628802e-01  3.7402878481927576e-01  3.7274610529767638e-01
  3.7142132574791981e-01  3.7005151662733293e-01  3.6863386353282573e-01  3.6716567783930532e-01  3.6564440744781751e-01
  3.6406764764341759e-01  3.6243315202601406e-01  3.6073884161750858e-01  3.5898280671444605e-01  3.5716330447793093e-01
  3.5527875618129667e-01  3.5332774440533032e-01  3.5130901018109528e-01  3.4922145008035071e-01  3.4706411325356784e-01
  3.4483619841554364e-01  3.4253705077861141e-01  3.4016615893344831e-01  3.3772315167748035e-01  3.3520779479088403e-01
  3.3261998776018492e-01  3.2995976044945424e-01  3.2722726971910115e-01  3.2442279599226337e-01  3.2154673976879372e-01
  3.1859961808684484e-01  3.1558206093204988e-01  3.1249480759430148e-01  3.0933870297212646e-01  3.0611469382465856e-01
  3.0282382497120791e-01  2.9946723543842751e-01  2.9604615455507705e-01  2.9256189799438320e-01  2.8901586376399763e-01
  2.8540952814355181e-01  2.8174444156980882e-01  2.7802222446941216e-01  2.7424456303923200e-01  2.7041320497430787e-01
  2.6652995514338923e-01  2.6259667121207220e-01  2.5861525921353412e-01  2.5458766906686475e-01  2.5051589004299457e-01
  2.4640194617822023e-01  2.4224789163532728e-01  2.3805580601230933e-01  2.3382778959868494e-01  2.2956595857941126e-01
  2.2527244018639478e-01  2.2094936779759905e-01  2.1659887598374966e-01  2.1222309550263604e-01  2.0782414824101067e-01
  2.0340414210408497e-01  1.9896516585262244e-01  1.9450928388762898e-01  1.9003853098263995e-01  1.8555490696360455e-01
  1.8106037133672642e-01  1.7655683810213771e-01  1.7204617278548992e-01  1.6753019230501778e-01  1.6301066537487122e-01
  1.5848931292315044e-01  1.5396780851994935e-01  1.4944777881540766e-01  1.4493080398777136e-01  1.4041841820146195e-01
  1.3591211007515400e-01  1.3141332315986123e-01  1.2692345642703140e-01  1.2244386476664947e-01  1.1797585949534931e-01
  1.1352070887453405e-01  1.0907963863850498e-01  1.0465383253259887e-01  1.0024443286133390e-01  9.5852541046564071e-02
  9.1479218195642240e-02  8.7125485679591594e-02  8.2792325721285767e-02  7.8480681993637322e-02  7.4191460227794936e-02
  6.9925528831349074e-02  6.5683719516546113e-02  6.1466827938511111e-02  5.7275614343479081e-02  5.3110804227034680e-02
  4.8973089002360699e-02  4.4863126678494798e-02  4.0781542548594923e-02  3.6728929888213240e-02  3.2705850663578707e-02
  2.8712836249887880e-02  2.4750388159604571e-02  2.0818978780767914e-02  1.6919052125308955e-02  1.3051024587375743e-02
  9.2152857116670692e-03  5.4121989717746356e-03  1.6421025585338363e-03 -2.0946898216170642e-03 -5.7978881382690058e-03
 -9.4672252186658607e-03 -1.3102455919319439e-02 -1.6703356287616308e-02 -2.0269722713415615e-02 -2.3801371070638632e-02
 -2.7298135848849939e-02 -3.0759869274829623e-02 -3.4186440424137370e-02 -3.7577734322667651e-02 -4.0933651038196767e-02
 -4.4254104766227279e-02 -4.7539023036144344e-02 -5.0788346271815374e-02 -5.4002027503956718e-02 -5.7180032085787008e-02
 -6.0322337405054320e-02 -6.3428932592437051e-02 -6.6499818226318813e-02 -6.9535006033936989e-02 -7.2534518588905125e-02
 -7.5498389005109273e-02 -7.8426660626978006e-02 -8.1319386716126318e-02 -8.4176630134373417e-02 -8.6998463023134173e-02
 -8.9784966479184519e-02 -9.2536230226800895e-02 -9.5252352286272587e-02 -9.7933438638789228e-02 -1.0057960288770121e-01
 -1.0319096591615413e-01 -1.0576765554109729e-01 -1.0830980616366551e-01 -1.1081755841593534e-01 -1.1329105880405471e-01
 -1.1573045934774662e-01 -1.1813591721618637e-01 -1.2050759436025305e-01 -1.2284565714115440e-01 -1.2515027595542577e-01
 -1.2742162485630290e-01 -1.2965988117146832e-01 -1.3186522511717175e-01 -1.3403783940872435e-01 -1.3617790886736664e-01
 -1.3828562002351033e-01 -1.4036116071635402e-01 -1.4240471968987256e-01 -1.4441648618518046e-01 -1.4639664952926895e-01
 -1.4834539872011690e-01 -1.5026292200817556e-01 -1.5214940647422726e-01 -1.5400503760361764e-01 -1.5582999885686202e-01
 -1.5762447123662540e-01 -1.5938863285107621e-01 -1.6112265847361432e-01 -1.6282671909897223e-01 -1.6450098149569051e-01
 -1.6614560775496709e-01 -1.6776075483588004e-01 -1.6934657410698456e-01 -1.7090321088428351e-01 -1.7243080396581706e-01
 -1.7392948521020116e-01 -1.7539937942774655e-01 -1.7684060457018771e-01 -1.7825327196203009e-01 -1.7963748653463130e-01
 -1.8099334706288381e-01 -1.8232094640449834e-01 -1.8362037174188897e-01 -1.8489170482665918e-01 -1.8613502222668921e-01
 -1.8735039557582478e-01 -1.8853789182616684e-01 -1.8969757350296265e-01 -1.9082949896209811e-01 -1.9193372265019121e-01
 -1.9301029536728684e-01 -1.9405926453215286e-01 -1.9508067445017721e-01 -1.9607456658386635e-01 -1.9704097982594507e-01
 -1.9797995077505728e-01 -1.9889151401406824e-01 -1.9977570239096779e-01 -2.0063254730237520e-01 -2.0146207897964485e-01
 -2.0226432677757325e-01 -2.0303931946570741e-01 -2.0378708552225447e-01 -2.0450765343059230e-01 -2.0520105197838157e-01
 -2.0586731055927890e-01 -2.0650645947725144e-01 -2.0711853025349247e-01 -2.0770355593593834e-01 -2.0826157141138660e-01
 -2.0879261372021535e-01 -2.0929672237370395e-01 -2.0977393967395475e-01 -2.1022431103641620e-01 -2.1064788531500719e-01
 -2.1104471512984252e-01 -2.1141485719755967e-01 -2.1175837266424682e-01 -2.1207532744097213e-01 -2.1236579254191404e-01
 -2.1262984442509311e-01 -2.1286756533570481e-01 -2.1307904365205382e-01 -2.1326437423408923e-01 -2.1342365877454134e-01
 -2.1355700615265924e-01 -2.1366453279055023e-01 -2.1374636301211980e-01 -2.1380262940461331e-01 -2.1383347317441972e-01
 -2.1383904434773765e-01 -2.1381950164676794e-01 -2.1377501226047949e-01 -2.1370575161027475e-01 -2.1361190311334310e-01
 -2.1349365794370201e-01 -2.1335121479092600e-01 -2.1318477961656379e-01 -2.1299456540824302e-01 -2.1278079193146296e-01
 -2.1254368547907512e-01 -2.1228347861845179e-01 -2.1200040993634239e-01 -2.1169472378141754e-01 -2.1136667000450141e-01
 -2.1101650369649153e-01 -2.1064448492396681e-01 -2.1025087846248328e-01 -2.0983595352755754e-01 -2.0939998350333855e-01
 -2.0894324566896683e-01 -2.0846602092262187e-01 -2.0796859350325719e-01 -2.0745125071002340e-01 -2.0691428261937919e-01
 -2.0635798179989001e-01 -2.0578264302471486e-01 -2.0518856298178084e-01 -2.0457603998164545e-01 -2.0394537366304707e-01
 -2.0329686469614314e-01 -2.0263081448343612e-01 -2.0194752485838766e-01 -2.0124729778172012e-01 -2.0053043503540666e-01
 -1.9979723791434859e-01 -1.9904800691574095e-01 -1.9828304142612585e-01 -1.9750263940613363e-01 -1.9670709707291215e-01
 -1.9589670858024366e-01 -1.9507176569634979e-01 -1.9423255747938409e-01 -1.9337936995061297e-01 -1.9251248576528404e-01
 -1.9163218388118253e-01 -1.9073873922487561e-01 -1.8983242235564446e-01 -1.8891349912710451e-01 -1.8798223034651318e-01
 -1.8703887143176573e-01 -1.8608367206607895e-01 -1.8511687585036277e-01 -1.8413871995385489e-01 -1.8314943481040263e-01
 -1.8214924404023317e-01 -1.8113836453304527e-01 -1.8011700654679527e-01 -1.7908537380763659e-01 -1.7804366361100191e-01
 -1.7699206692382760e-01 -1.7593076848792094e-01 -1.7485994692446941e-01 -1.7377977483969298e-01 -1.7269041893163847e-01
 -1.7159204009811657e-01 -1.7048479354578142e-01 -1.6936882890035235e-01 -1.6824429031797869e-01 -1.6711131659774645e-01
 -1.6597004129532780e-01 -1.6482059283777312e-01 -1.6366309463944528e-01 -1.6249766521909667e-01 -1.6132441831808839e-01
 -1.6014346301975230e-01 -1.5895490386989539e-01 -1.5775884099844642e-01 -1.5655537024224558e-01 -1.5534458326897599e-01
 -1.5412656770223826e-01 -1.5290140724776710e-01 -1.5166918182079081e-01 -1.5042996767453284e-01 -1.4918383752985623e-01
 -1.4793086070605024e-01 -1.4667110325275962e-01 -1.4540462808305638e-01 -1.4413149510765391e-01 -1.4285176137026381e-01
 -1.4156548118409501e-01 -1.4027270626949531e-01 -1.3897348589273578e-01 -1.3766786700593722e-01 -1.3635589438813950e-01
 -1.3503761078751289e-01 -1.3371305706471243e-01 -1.3238227233737437e-01 -1.3104529412575547e-01 -1.2970215849951422e-01
 -1.2835290022563525e-01 -1.2699755291749565e-01 -1.2563614918507413e-01 -1.2426872078630247e-01 -1.2289529877955961e-01
 -1.2151591367730803e-01 -1.2013059560087286e-01 -1.1873937443636604e-01 -1.1734227999855718e-01 -1.1593934228060840e-01
 -1.1453059183612205e-01 -1.1311606019435916e-01 -1.1169578027885660e-01 -1.1026978682899366e-01 -1.0883811682450789e-01
 -1.0740080991296055e-01 -1.0595790884015127e-01 -1.0450945988348233e-01 -1.0305551328827216e-01 -1.0159612370701844e-01
 -1.0013135064161047e-01 -9.8661258888491032e-02 -9.7185918986767622e-02 -9.5705407669273157e-02 -9.4219808316576004e-02
 -9.2729211413939569e-02 -9.1233715011231134e-02 -8.9733425185780161e-02 -8.8228456508186184e-02 -8.6718932511075750e-02
 -8.5204986160809223e-02 -8.3686760332136637e-02 -8.2164408285803056e-02 -8.0638094149103584e-02 -7.9107993399387386e-02
 -7.7574293350511470e-02 -7.6037193642243678e-02 -7.4496906732615276e-02 -7.2953658393222709e-02 -7.1407688207478962e-02
 -6.9859250071814330e-02 -6.8308612699826535e-02 -6.6756060129380207e-02 -6.5201892232655961e-02 -6.3646425229148693e-02
 -6.2089992201615457e-02 -6.0532943614972606e-02 -5.8975647838142464e-02 -5.7418491668849346e-02 -5.5861880861365044e-02
 -5.4306240657203658e-02 -5.2752016318765929e-02 -5.1199673665932928e-02 -4.9649699615609125e-02 -4.8102602724215016e-02
 -4.6558913733128975e-02 -4.5019186117078711e-02 -4.3483996635481914e-02 -4.1953945886736621e-02 -4.0429658865460669e-02
 -3.8911785522680792e-02 -3.7401001328971048e-02 -3.5898007831985025e-02 -3.4403532841222641e-02 -3.2918329317215958e-02
 -3.1443173564471856e-02 -2.9978863369861667e-02 -2.8526216127788724e-02 -2.7086066952135810e-02 -2.5659266774992411e-02
 -2.4246680432161820e-02 -2.2849184735448034e-02 -2.1467666531722586e-02 -2.0103020748771121e-02 -1.8756148427919863e-02
 -1.7427954743441890e-02 -1.6119347008743276e-02 -1.4831232669329054e-02 -1.3564517282549017e-02 -1.2320102484123369e-02
 -1.1098883941448198e-02 -9.9017492936807998e-03 -8.7295760786048511e-03 -7.5832296462753791e-03 -6.4635610594436285e-03
 -5.3714049807617121e-03 -4.3075775467671350e-03 -3.2728742286471427e-03 -2.2680676797829048e-03 -1.2939055700735616e-03
 -3.5110840704008549e-04  5.5963265629104875e-04  1.4376580267242648e-03  2.2823418894515435e-03  3.0930944398291664e-03
  3.8693641283747133e-03  4.6106399189840934e-03  5.3164535603688751e-03  5.9863818707136616e-03  6.6200490355537139e-03
  7.2171289188726669e-03  7.7773473874204789e-03  8.3004846482514581e-03  8.7863775994825258e-03  9.2349221942716157e-03
  9.6460758180162056e-03  1.0019859678772062e-02  1.0356361210892074e-02  1.0655736491885379e-02  1.0918212672496451e-02
  1.1144090420004579e-02  1.1333746374743318e-02  1.1487635619840180e-02  1.1606294164176535e-02  1.1690341438567562e-02
  1.1740482805162449e-02  1.1757512079202370e-02  1.1742313693408061e-02  1.1695861723464641e-02  1.1619215265459604e-02
  1.1513513171082320e-02  1.1379968742695474e-02  1.1219864392450611e-02  1.1034546265447788e-02  1.0825418826939312e-02
  1.0593939413577594e-02  1.0341612748707105e-02  1.0069985421700418e-02  9.7806403313383718e-03  9.4751910932343187e-03
  9.1552764113024925e-03  8.8225544132704559e-03  8.4786969502356688e-03  8.1253838602661464e-03  7.7642971960452277e-03
  7.3971154165604364e-03  7.0255075428364549e-03  6.6511272777121828e-03  6.2756070896619167e-03  5.9005522606606180e-03
  5.5275348980932870e-03  5.1580879107084405e-03  4.7936989486156859e-03  4.4358043073274038e-03  4.0857827958445201e-03
  3.7449495687863986e-03  3.4145499225648208e-03  3.0957530556020591e-03  2.7896457925930870e-03  2.4972262728118495e-03
  2.2193976024616597e-03  1.9569614710696829e-03  1.7106117319255487e-03  1.4809279465640218e-03  1.2683688932918146e-03
  1.0732660397584854e-03  8.9581697957142703e-04  7.3607883295497846e-04  5.9396161145361989e-04  4.6922154667930341e-04
  3.6145438310281015e-04  2.7008863488929942e-04  1.9437880677790817e-04  1.3339857900545387e-04  8.6033956274253029e-05
  5.0976380764045268e-05  2.6715809187986458e-05  1.1533753892786951e-05  3.4962880029269875e-06  4.4701460897647982e-07
  0.0000000000000000e+00
  0.0000000000000000e+00  7.3389404235007291e+01  1.1023551330499035e+02  1.2155185022026326e+02  1.1773772222822080e+02
  1.0786953675973443e+02  9.8741658820121614e+01  9.4062419879609678e+01  9.4378891914286655e+01  9.7716838837985549e+01
  1.0088736784142793e+02  1.0124056329921891e+02  9.7771081677473191e+01  9.1213155596167041e+01  8.3542477190229846e+01
  7.6957044952406463e+01  7.2761042177167397e+01  7.1062079868194616e+01  7.1015549730908560e+01  7.1304636294167196e+01
  7.0805674535204744e+01  6.9057473587544180e+01  6.6238552060007052e+01  6.2952879322544376e+01  5.9916358074784483e+01
  5.7602093785889871e+01  5.6101585018857790e+01  5.5204504912583381e+01  5.4538742169218921e+01  5.3749851308855291e+01
  5.2658201132965296e+01  5.1274427241543926e+01  4.9739726589232184e+01  4.8245550881798820e+01  4.6939964363852745e+01
  4.5871203273497713e+01  4.5001288085967246e+01  4.4241316852107865e+01  4.3494592826492678e+01  4.2700498902184655e+01
  4.1848515606638379e+01  4.0965084773100195e+01  4.0094633311120973e+01  3.9277477147326550e+01  3.8531782317691793e+01
  3.7853038197779767e+01  3.7222096540513107e+01  3.6614939628099073e+01  3.6013343120011577e+01  3.5410884016960935e+01
  3.4810944342891027e+01  3.4222454332648979e+01  3.3654994106667026e+01  3.3114017300780617e+01  3.2599475827159978e+01
  3.2107412607698549e+01  3.1632098221506478e+01  3.1168404914704958e+01  3.0713676753978369e+01  3.0267719215715562e+01
  2.9831898413694109e+01  2.9408090243481514e+01  2.8997566626792143e+01  2.8600387964838543e+01  2.8215634349026452e+01
  2.7841859882545325e+01  2.7477596770295868e+01  2.7121833897969065e+01  2.6774146137907088e+01  2.6434524249065475e+01
  2.6103153660674316e+01  2.5780173624782766e+01  2.5465490387760489e+01  2.5158781226376423e+01  2.4859586816148784e+01
  2.4567415646713748e+01  2.4281851954006179e+01  2.4002613153022811e+01  2.3729525563661376e+01  2.3462478618588580e+01
  2.3201374588206907e+01  2.2946081183464177e+01  2.2696418911960606e+01  2.2452177926838036e+01  2.2213139281079236e+01
  2.1979097408388043e+01  2.1749877169146846e+01  2.1525333017326911e+01  2.1305339822372829e+01  2.1089782462690881e+01
  2.0878545017391225e+01  2.0671504935276211e+01  2.0468535290472733e+01  2.0269508997789298e+01  2.0074303240617574e+01
  1.9882803492467541e+01  1.9694904446665781e+01  1.9510508310201843e+01  1.9329522617981425e+01  1.9151857848011808e+01
  1.8977425545595711e+01  1.8806138290579476e+01  1.8637910473502725e+01  1.8472659102721604e+01  1.8310304571920156e+01
  1.8150771011628475e+01  1.7993986005465757e+01  1.7839880107394666e+01  1.7688386285953850e+01  1.7539439374336023e+01
  1.7392975877885746e+01  1.7248934079021243e+01  1.7107254152632553e+01  1.6967878256597253e+01  1.6830750571686565e+01
  1.6695817241964711e+01  1.6563026253783125e+01  1.6432327282336917e+01  1.6303671514576106e+01  1.6177011529837422e+01
  1.6052301286198020e+01  1.5929496116843650e+01  1.5808552708683884e+01  1.5689429065906671e+01  1.5572084472655046e+01
  1.5456479452430822e+01  1.5342575712486466e+01  1.5230336072414332e+01  1.5119724395923708e+01  1.5010705562398917e+01
  1.4903245449702171e+01  1.4797310906259488e+01  1.4692869712690557e+01  1.4589890547405915e+01  1.4488342964814564e+01
  1.4388197368959640e+01  1.4289424977568308e+01  1.4191997780787036e+01  1.4095888514863351e+01  1.4001070647425626e+01
  1.3907518357382717e+01  1.3815206507557457e+01  1.3724110616368252e+01  1.3634206840883291e+01  1.3545471961658588e+01
  1.3457883361878737e+01  1.3371419001285091e+01  1.3286057394390362e+01  1.3201777598773999e+01  1.3118559202013548e+01
  1.3036382303861149e+01  1.2955227495480587e+01  1.2875075844556060e+01  1.2795908884860189e+01  1.2717708602814904e+01
  1.2640457420237560e+01  1.2564138177161986e+01  1.2488734122424834e+01  1.2414228906061249e+01  1.2340606568794072e+01
  1.2267851528688754e+01  1.2195948568429158e+01  1.2124882825362901e+01  1.2054639780110204e+01  1.1985205242483309e+01
  1.1916565336606311e+01  1.1848706494370530e+01  1.1781615455815894e+01  1.1715279268617010e+01  1.1649685285600462e+01
  1.1584821157718919e+01  1.1520674817329226e+01  1.1457234455740151e+01  1.1394488498219479e+01  1.1332425578413215e+01
  1.1271034532942103e+01  1.1210304429353549e+01  1.1150224601909647e+01  1.1090784687334519e+01  1.1031974649618677e+01
  1.0973784741585639e+01  1.0916205410935394e+01  1.0859227195970934e+01  1.0802840618738696e+01  1.0747036137008861e+01
  1.0691804279824625e+01  1.0637135871356707e+01  1.0583022265210770e+01  1.0529455564715386e+01  1.0476428587973862e+01
  1.0423934421348402e+01  1.0371965860466261e+01  1.0320514832458617e+01  1.0269571952441895e+01  1.0219126959127431e+01
  1.0169169925204583e+01  1.0119692592684499e+01  1.0070689723844847e+01  1.0022159664369291e+01  9.9741024642685598e+00
  9.9265168092136147e+00  9.8793968030962400e+00  9.8327289275372660e+00  9.7864924238260098e+00  9.7406652464126164e+00
  9.6952315298152101e+00  9.6501892810841792e+00  9.6055562784961275e+00  9.5613642189521677e+00  9.5176424299212510e+00
  9.4743999085150747e+00  9.4316071673296378e+00  9.3891885511945024e+00  9.3470472997509404e+00  9.3051066514288134e+00
  9.2633528704301789e+00  9.2218758944406822e+00  9.1808644634549896e+00  9.1405265324431682e+00  9.1009893434971936e+00
  9.0621966409051087e+00  9.0238295593457245e+00  8.9853837199394047e+00  8.9463861314280226e+00  8.9066342851489093e+00
  8.8664376074178719e+00  8.8267237018236404e+00  8.7887178751740382e+00  8.7534123082729707e+00  8.7210109530082445e+00
  8.6903958620903978e+00  8.6590550744180383e+00  8.6237765740445198e+00  8.5815492872884427e+00  8.5304907429474177e+00
  8.4707983776493183e+00  8.4057244863409757e+00  8.3425748179143842e+00  8.2937308159703491e+00  8.6844243032517277e+00
  8.6305022256225197e+00  8.5752958131495483e+00  8.5188036966531353e+00  8.4610266758420831e+00  8.4019676937373671e+00
  8.3416318094134319e+00  8.2800261690571517e+00  8.2171599753444013e+00  8.1530444551342569e+00  8.0876928254808558e+00
  8.0211202579628615e+00  7.9533438413305761e+00  7.8843825424706804e+00  7.8142571656886082e+00  7.7429903103085591e+00
  7.6706063265911304e+00  7.5971312699685916e+00  7.5225928535977982e+00  7.4470203992307225e+00  7.3704447864026257e+00
  7.2928983999378634e+00  7.2144150757733234e+00  7.1350300450995015e+00  7.0547798768191869e+00  6.9737024183238203e+00
  6.8918367345874438e+00  6.8092230455783129e+00  6.7259026619881297e+00  6.6419179192789031e+00  6.5573121100474578e+00
  6.4721294147075605e+00  6.3864148304896897e+00  6.3002140987584285e+00  6.2135736306475025e+00  6.1265404310124412e+00
  6.0391620207008723e+00  5.9514863571404542e+00  5.8635617532444391e+00  5.7754367946348681e+00  5.6871602551833966e+00
  5.5987810108697582e+00  5.5103479519578586e+00  5.4219098934895031e+00  5.3335154840957530e+00  5.2452131131259199e+00
  5.1570508160941921e+00  5.0690761784438925e+00  4.9813362376293657e+00  4.8938773835155098e+00  4.8067452570949243e+00
  4.7199846475227059e+00  4.6336393874688637e+00  4.5477522467883880e+00  4.4623648245335739e+00  4.3775174458869826e+00
  4.2932491064052165e+00  4.2095974662836300e+00  4.1265988525206652e+00  4.0442882617392275e+00  3.9626993636305881e+00
  3.8818645050208227e+00  3.8018147145597596e+00  3.7225797080324718e+00  3.6441878942932764e+00  3.5666663818222721e+00
  3.4900409859043982e+00  3.4143362364310157e+00  3.3395753863240198e+00  3.2657804205824754e+00  3.1929720659517740e+00
  3.1211698012153257e+00  3.0503918681087634e+00  2.9806552828566875e+00  2.9119758483319229e+00  2.8443681668373091e+00
  2.7778456535100147e+00  2.7124205503483734e+00  2.6481039408612519e+00  2.5849057653399345e+00  2.5228348367525499e+00
  2.4618988572609970e+00  2.4021044353604211e+00  2.3434571036412022e+00  2.2859613371734739e+00  2.2296205725141660e+00
  2.1744372273365715e+00  2.1204127206824404e+00  2.0675474938366007e+00  2.0158410318241011e+00  1.9652918855298824e+00
  1.9158976944409707e+00  1.8676552100112038e+00  1.8205603196484703e+00  1.7746080713244892e+00  1.7297926988071013e+00
  1.6861076475150958e+00  1.6435456009955578e+00  1.6020985080237422e+00  1.5617576103254711e+00  1.5225134709220636e+00
  1.4843560030977798e+00  1.4472744999898037e+00  1.4112576648007367e+00  1.3762936416336331e+00  1.3423700469495430e+00
  1.3094740016475970e+00  1.2775921637676078e+00  1.2467107618151969e+00  1.2168156284499803e+00  1.1878922291598668e+00
  1.1599256787038184e+00  1.1329007533816531e+00  1.1068019033877767e+00  1.0816132653885939e+00  1.0573186753236008e+00
  1.0339016814301571e+00  1.0113455574919366e+00  9.8963331631105944e-01  9.6874772340390480e-01  9.4867131092060197e-01
  9.2938639178820259e-01  9.1087507407753199e-01  8.9311927559372206e-01  8.7610073869042326e-01  8.5980104530769552e-01
  8.4420163223358136e-01  8.2928380658935807e-01  8.1502876153846882e-01  8.0141759221913578e-01  7.8843131190065252e-01
  7.7605086836335502e-01  7.6425716050227499e-01  7.5303105515447144e-01  7.4235340415004414e-01  7.3220506158682452e-01
  7.2256690132874912e-01  7.1341983472791148e-01  7.0474482857029441e-01  6.9652292324518339e-01  6.8873525113825829e-01
  6.8136305524836582e-01  6.7438770802797232e-01  6.6779073044729698e-01  6.6155381128212309e-01  6.5565882662529207e-01
  6.5008785962187554e-01  6.4482322042802775e-01  6.3984746639351886e-01  6.3514342246794786e-01  6.3069420183063418e-01
  6.2648322674419221e-01  6.2249424963178313e-01  6.1871137437804802e-01  6.1511907785372055e-01  6.1170223166392090e-01
  6.0844612412012733e-01  6.0533648243583049e-01  6.0235949514586551e-01  5.9950183474942598e-01  5.9675068057675673e-01
  5.9409374187952624e-01  5.9151928114488028e-01  5.8901613760383964e-01  5.8657374788143524e-01  5.8418215065214329e-01
  5.8183197867872716e-01  5.7951444932050555e-01  5.7722135477218794e-01  5.7494505203494584e-01  5.7267845261971861e-01
  5.7041501198275457e-01  5.6814871869338779e-01  5.6587408333404898e-01  5.6358612713251310e-01  5.6128037032638045e-01
  5.5895282025979476e-01  5.5659995921239458e-01  5.5421873196050142e-01  5.5180653307054250e-01  5.4936119392470772e-01
  5.4688096947884424e-01  5.4436452475258335e-01  5.4181092105170459e-01  5.3921960192273466e-01  5.3659037883978022e-01
  5.3392341662359810e-01  5.3121921859289878e-01  5.2847861144788588e-01  5.2570272988603062e-01  5.2289300095008218e-01
  5.2005112810831167e-01  5.1717907506699312e-01  5.1427904931511859e-01  5.1135348540134784e-01  5.0840502794319564e-01
  5.0543651436845116e-01  5.0245095738883461e-01  4.9945152720588848e-01  4.9644153344910424e-01  4.9342440684628341e-01
  4.9040368062613460e-01  4.8738297165310568e-01  4.8436596129445086e-01  4.8135637601953279e-01  4.7835796773136052e-01
  4.7537449383036207e-01  4.7240969701039204e-01  4.6946728478697541e-01  4.6655090875778527e-01  4.6366414359535651e-01
  4.6081046577203438e-01  4.5799323201715852e-01  4.5521565750648202e-01  4.5248079378382522e-01  4.4979150641496590e-01
  4.4715045237376294e-01  4.4456005716063401e-01  4.4202249229402707e-01  4.3953966156791463e-01  4.3711320238198187e-01
  4.3474449104319618e-01  4.3243464824700617e-01  4.3018454466826850e-01  4.2799480666190332e-01  4.2586582207327706e-01
  4.2379774615831378e-01  4.2179050761333370e-01  4.1984381471462062e-01  4.1795716156771667e-01  4.1612983446644514e-01
  4.1436091836166172e-01  4.1264930343973300e-01  4.1099369181074374e-01  4.0939260430643137e-01  4.0784438738784878e-01
  4.0634722016275548e-01  4.0489912151273594e-01  4.0349795733004673e-01  4.0214144786419093e-01  4.0082717517822086e-01
  3.9955259071476890e-01  3.9831502297180610e-01  3.9711168528812862e-01  3.9593968373857263e-01  3.9479602513895662e-01
  3.9367762516075211e-01  3.9258131655548206e-01  3.9150385748884753e-01  3.9044193998458188e-01  3.8939219847803364e-01
  3.8835121847947657e-01  3.8731554534714813e-01  3.8628169317001615e-01  3.8524615376027294e-01  3.8420540575555751e-01
  3.8315592383090608e-01  3.8209418802043060e-01  3.8101669314872427e-01  3.7991995837199677e-01  3.7880053682893544e-01
  3.7765502540129642e-01  3.7648007458422222e-01  3.7527239846628802e-01  3.7402878481927576e-01  3.7274610529767638e-01
  3.7142132574791981e-01  3.7005151662733293e-01  3.6863386353282573e-01  3.6716567783930532e-01  3.6564440744781751e-01
  3.6406764764341759e-01  3.6243315202601406e-01  3.6073884161750858e-01  3.5898280671444605e-01  3.5716330447793093e-01
  3.5527875618129667e-01  3.5332774440533032e-01  3.5130901018109528e-01  3.4922145008035071e-01  3.4706411325356784e-01
  3.4483619841554364e-01  3.4253705077861141e-01  3.4016615893344831e-01  3.3772315167748035e-01  3.3520779479088403e-01
  3.3261998776018492e-01  3.2995976044945424e-01  3.2722726971910115e-01  3.2442279599226337e-01  3.2154673976879372e-01
  3.1859961808684484e-01  3.1558206093204988e-01  3.1249480759430148e-01  3.0933870297212646e-01  3.0611469382465856e-01
  3.0282382497120791e-01  2.9946723543842751e-01  2.9604615455507705e-01  2.9256189799438320e-01  2.8901586376399763e-01
  2.8540952814355181e-01  2.8174444156980882e-01  2.7802222446941216e-01  2.7424456303923200e-01  2.7041320497430787e-01
  2.6652995514338923e-01  2.6259667121207220e-01  2.5861525921353412e-01  2.5458766906686475e-01  2.5051589004299457e-01
  2.4640194617822023e-01  2.4224789163532728e-01  2.3805580601230933e-01  2.3382778959868494e-01  2.2956595857941126e-01
  2.2527244018639478e-01  2.2094936779759905e-01  2.1659887598374966e-01  2.1222309550263604e-01  2.0782414824101067e-01
  2.0340414210408497e-01  1.9896516585262244e-01  1.9450928388762898e-01  1.9003853098263995e-01  1.8555490696360455e-01
  1.8106037133672642e-01  1.7655683810213771e-01  1.7204617278548992e-01  1.6753019230501778e-01  1.6301066537487122e-01
  1.5848931292315044e-01  1.5396780851994935e-01  1.4944777881540766e-01  1.4493080398777136e-01  1.4041841820146195e-01
  1.3591211007515400e-01  1.3141332315986123e-01  1.2692345642703140e-01  1.2244386476664947e-01  1.1797585949534931e-01
  1.1352070887453405e-01  1.0907963863850498e-01  1.0465383253259887e-01  1.0024443286133390e-01  9.5852541046564071e-02
  9.1479218195642240e-02  8.7125485679591594e-02  8.2792325721285767e-02  7.8480681993637322e-02  7.4191460227794936e-02
  6.9925528831349074e-02  6.5683719516546113e-02  6.1466827938511111e-02  5.7275614343479081e-02  5.3110804227034680e-02
  4.8973089002360699e-02  4.4863126678494798e-02  4.0781542548594923e-02  3.6728929888213240e-02  3.2705850663578707e-02
  2.8712836249887880e-02  2.4750388159604571e-02  2.0818978780767914e-02  1.6919052125308955e-02  1.3051024587375743e-02
  9.2152857116670692e-03  5.4121989717746356e-03  1.6421025585338363e-03 -2.0946898216170642e-03 -5.7978881382690058e-03
 -9.4672252186658607e-03 -1.3102455919319439e-02 -1.6703356287616308e-02 -2.0269722713415615e-02 -2.3801371070638632e-02
 -2.7298135848849939e-02 -3.0759869274829623e-02 -3.4186440424137370e-02 -3.7577734322667651e-02 -4.0933651038196767e-02
 -4.4254104766227279e-02 -4.7539023036144344e-02 -5.0788346271815374e-02 -5.4002027503956718e-02 -5.7180032085787008e-02
 -6.0322337405054320e-02 -6.3428932592437051e-02 -6.6499818226318813e-02 -6.9535006033936989e-02 -7.2534518588905125e-02
 -7.5498389005109273e-02 -7.8426660626978006e-02 -8.1319386716126318e-02 -8.4176630134373417e-02 -8.6998463023134173e-02
 -8.9784966479184519e-02 -9.2536230226800895e-02 -9.5252352286272587e-02 -9.7933438638789228e-02 -1.0057960288770121e-01
 -1.0319096591615413e-01 -1.0576765554109729e-01 -1.0830980616366551e-01 -1.1081755841593534e-01 -1.1329105880405471e-01
 -1.1573045934774662e-01 -1.1813591721618637e-01 -1.2050759436025305e-01 -1.2284565714115440e-01 -1.2515027595542577e-01
 -1.2742162485630290e-01 -1.2965988117146832e-01 -1.3186522511717175e-01 -1.3403783940872435e-01 -1.3617790886736664e-01
 -1.3828562002351033e-01 -1.4036116071635402e-01 -1.4240471968987256e-01 -1.4441648618518046e-01 -1.4639664952926895e-01
 -1.4834539872011690e-01 -1.5026292200817556e-01 -1.5214940647422726e-01 -1.5400503760361764e-01 -1.5582999885686202e-01
 -1.5762447123662540e-01 -1.5938863285107621e-01 -1.6112265847361432e-01 -1.6282671909897223e-01 -1.6450098149569051e-01
 -1.6614560775496709e-01 -1.6776075483588004e-01 -1.6934657410698456e-01 -1.7090321088428351e-01 -1.7243080396581706e-01
 -1.7392948521020116e-01 -1.7539937942774655e-01 -1.7684060457018771e-01 -1.7825327196203009e-01 -1.7963748653463130e-01
 -1.8099334706288381e-01 -1.8232094640449834e-01 -1.8362037174188897e-01 -1.8489170482665918e-01 -1.8613502222668921e-01
 -1.8735039557582478e-01 -1.8853789182616684e-01 -1.8969757350296265e-01 -1.9082949896209811e-01 -1.9193372265019121e-01
 -1.9301029536728684e-01 -1.9405926453215286e-01 -1.9508067445017721e-01 -1.9607456658386635e-01 -1.9704097982594507e-01
 -1.9797995077505728e-01 -1.9889151401406824e-01 -1.9977570239096779e-01 -2.0063254730237520e-01 -2.0146207897964485e-01
 -2.0226432677757325e-01 -2.0303931946570741e-01 -2.0378708552225447e-01 -2.0450765343059230e-01 -2.0520105197838157e-01
 -2.0586731055927890e-01 -2.0650645947725144e-01 -2.0711853025349247e-01 -2.0770355593593834e-01 -2.0826157141138660e-01
 -2.0879261372021535e-01 -2.0929672237370395e-01 -2.0977393967395475e-01 -2.1022431103641620e-01 -2.1064788531500719e-01
 -2.1104471512984252e-01 -2.1141485719755967e-01 -2.1175837266424682e-01 -2.1207532744097213e-01 -2.1236579254191404e-01
 -2.1262984442509311e-01 -2.1286756533570481e-01 -2.1307904365205382e-01 -2.1326437423408923e-01 -2.1342365877454134e-01
 -2.1355700615265924e-01 -2.1366453279055023e-01 -2.1374636301211980e-01 -2.1380262940461331e-01 -2.1383347317441972e-01
 -2.1383904434773765e-01 -2.1381950164676794e-01 -2.1377501226047949e-01 -2.1370575161027475e-01 -2.1361190311334310e-01
 -2.1349365794370201e-01 -2.1335121479092600e-01 -2.1318477961656379e-01 -2.1299456540824302e-01 -2.1278079193146296e-01
 -2.1254368547907512e-01 -2.1228347861845179e-01 -2.1200040993634239e-01 -2.1169472378141754e-01 -2.1136667000450141e-01
 -2.1101650369649153e-01 -2.1064448492396681e-01 -2.1025087846248328e-01 -2.0983595352755754e-01 -2.0939998350333855e-01
 -2.0894324566896683e-01 -2.0846602092262187e-01 -2.0796859350325719e-01 -2.0745125071002340e-01 -2.0691428261937919e-01
 -2.0635798179989001e-01 -2.0578264302471486e-01 -2.0518856298178084e-01 -2.0457603998164545e-01 -2.0394537366304707e-01
 -2.0329686469614314e-01 -2.0263081448343612e-01 -2.0194752485838766e-01 -2.0124729778172012e-01 -2.0053043503540666e-01
 -1.9979723791434859e-01 -1.9904800691574095e-01 -1.9828304142612585e-01 -1.9750263940613363e-01 -1.9670709707291215e-01
 -1.9589670858024366e-01 -1.9507176569634979e-01 -1.9423255747938409e-01 -1.9337936995061297e-01 -1.9251248576528404e-01
 -1.9163218388118253e-01 -1.9073873922487561e-01 -1.8983242235564446e-01 -1.8891349912710451e-01 -1.8798223034651318e-01
 -1.8703887143176573e-01 -1.8608367206607895e-01 -1.8511687585036277e-01 -1.8413871995385489e-01 -1.8314943481040263e-01
 -1.8214924404023317e-01 -1.8113836453304527e-01 -1.8011700654679527e-01 -1.7908537380763659e-01 -1.7804366361100191e-01
 -1.7699206692382760e-01 -1.7593076848792094e-01 -1.7485994692446941e-01 -1.7377977483969298e-01 -1.7269041893163847e-01
 -1.7159204009811657e-01 -1.7048479354578142e-01 -1.6936882890035235e-01 -1.6824429031797869e-01 -1.6711131659774645e-01
 -1.6597004129532780e-01 -1.6482059283777312e-01 -1.6366309463944528e-01 -1.6249766521909667e-01 -1.6132441831808839e-01
 -1.6014346301975230e-01 -1.5895490386989539e-01 -1.5775884099844642e-01 -1.5655537024224558e-01 -1.5534458326897599e-01
 -1.5412656770223826e-01 -1.5290140724776710e-01 -1.5166918182079081e-01 -1.5042996767453284e-01 -1.4918383752985623e-01
 -1.4793086070605024e-01 -1.4667110325275962e-01 -1.4540462808305638e-01 -1.4413149510765391e-01 -1.4285176137026381e-01
 -1.4156548118409501e-01 -1.4027270626949531e-01 -1.3897348589273578e-01 -1.3766786700593722e-01 -1.3635589438813950e-01
 -1.3503761078751289e-01 -1.3371305706471243e-01 -1.3238227233737437e-01 -1.3104529412575547e-01 -1.2970215849951422e-01
 -1.2835290022563525e-01 -1.2699755291749565e-01 -1.2563614918507413e-01 -1.2426872078630247e-01 -1.2289529877955961e-01
 -1.2151591367730803e-01 -1.2013059560087286e-01 -1.1873937443636604e-01 -1.1734227999855718e-01 -1.1593934228060840e-01
 -1.1453059183612205e-01 -1.1311606019435916e-01 -1.1169578027885660e-01 -1.1026978682899366e-01 -1.0883811682450789e-01
 -1.0740080991296055e-01 -1.0595790884015127e-01 -1.0450945988348233e-01 -1.0305551328827216e-01 -1.0159612370701844e-01
 -1.0013135064161047e-01 -9.8661258888491032e-02 -9.7185918986767622e-02 -9.5705407669273157e-02 -9.4219808316576004e-02
 -9.2729211413939569e-02 -9.1233715011231134e-02 -8.9733425185780161e-02 -8.8228456508186184e-02 -8.6718932511075750e-02
 -8.5204986160809223e-02 -8.3686760332136637e-02 -8.2164408285803056e-02 -8.0638094149103584e-02 -7.9107993399387386e-02
 -7.7574293350511470e-02 -7.6037193642243678e-02 -7.4496906732615276e-02 -7.2953658393222709e-02 -7.1407688207478962e-02
 -6.9859250071814330e-02 -6.8308612699826535e-02 -6.6756060129380207e-02 -6.5201892232655961e-02 -6.3646425229148693e-02
 -6.2089992201615457e-02 -6.0532943614972606e-02 -5.8975647838142464e-02 -5.7418491668849346e-02 -5.5861880861365044e-02
 -5.4306240657203658e-02 -5.2752016318765929e-02 -5.1199673665932928e-02 -4.9649699615609125e-02 -4.8102602724215016e-02
 -4.6558913733128975e-02 -4.5019186117078711e-02 -4.3483996635481914e-02 -4.1953945886736621e-02 -4.0429658865460669e-02
 -3.8911785522680792e-02 -3.7401001328971048e-02 -3.5898007831985025e-02 -3.4403532841222641e-02 -3.2918329317215958e-02
 -3.1443173564471856e-02 -2.9978863369861667e-02 -2.8526216127788724e-02 -2.7086066952135810e-02 -2.5659266774992411e-02
 -2.4246680432161820e-02 -2.2849184735448034e-02 -2.1467666531722586e-02 -2.0103020748771121e-02 -1.8756148427919863e-02
 -1.7427954743441890e-02 -1.6119347008743276e-02 -1.4831232669329054e-02 -1.3564517282549017e-02 -1.2320102484123369e-02
 -1.1098883941448198e-02 -9.9017492936807998e-03 -8.7295760786048511e-03 -7.5832296462753791e-03 -6.4635610594436285e-03
 -5.3714049807617121e-03 -4.3075775467671350e-03 -3.2728742286471427e-03 -2.2680676797829048e-03 -1.2939055700735616e-03
 -3.5110840704008549e-04  5.5963265629104875e-04  1.4376580267242648e-03  2.2823418894515435e-03  3.0930944398291664e-03
  3.8693641283747133e-03  4.6106399189840934e-03  5.3164535603688751e-03  5.9863818707136616e-03  6.6200490355537139e-03
  7.2171289188726669e-03  7.7773473874204789e-03  8.3004846482514581e-03  8.7863775994825258e-03  9.2349221942716157e-03
  9.6460758180162056e-03  1.0019859678772062e-02  1.0356361210892074e-02  1.0655736491885379e-02  1.0918212672496451e-02
  1.1144090420004579e-02  1.1333746374743318e-02  1.1487635619840180e-02  1.1606294164176535e-02  1.1690341438567562e-02
  1.1740482805162449e-02  1.1757512079202370e-02  1.1742313693408061e-02  1.1695861723464641e-02  1.1619215265459604e-02
  1.1513513171082320e-02  1.1379968742695474e-02  1.1219864392450611e-02  1.1034546265447788e-02  1.0825418826939312e-02
  1.0593939413577594e-02  1.0341612748707105e-02  1.0069985421700418e-02  9.7806403313383718e-03  9.4751910932343187e-03
  9.1552764113024925e-03  8.8225544132704559e-03  8.4786969502356688e-03  8.1253838602661464e-03  7.7642971960452277e-03
  7.3971154165604364e-03  7.0255075428364549e-03  6.6511272777121828e-03  6.2756070896619167e-03  5.9005522606606180e-03
  5.5275348980932870e-03  5.1580879107084405e-03  4.7936989486156859e-03  4.4358043073274038e-03  4.0857827958445201e-03
  3.7449495687863986e-03  3.4145499225648208e-03  3.0957530556020591e-03  2.7896457925930870e-03  2.4972262728118495e-03
  2.2193976024616597e-03  1.9569614710696829e-03  1.7106117319255487e-03  1.4809279465640218e-03  1.2683688932918146e-03
  1.0732660397584854e-03  8.9581697957142703e-04  7.3607883295497846e-04  5.9396161145361989e-04  4.6922154667930341e-04
  3.6145438310281015e-04  2.7008863488929942e-04  1.9437880677790817e-04  1.3339857900545387e-04  8.6033956274253029e-05
  5.0976380764045268e-05  2.6715809187986458e-05  1.1533753892786951e-05  3.4962880029269875e-06  4.4701460897647982e-07
  0.0000000000000000e+00
