# Supplementary material
Source: publisher figshare collection journal article supplement (https://rs.figshare.com/ndownloader/files/37464464)
Supplement: Supplementary file 2 [file 37464464 › Ordered_Nanoporous_Metals_SI/ONMs_EAM_Potential_files/EAM_Pd.Sheng.lammps.eam]

# EAM potentials generated by H.W.Sheng (hsheng@gmu.edu) on Thu Aug  5 10:17:05 2010
#
##
   2  Pd1 Pd2   
 1001   1.0000000000000000e-03 1001   6.4000000000000003e-03   6.4000000000000004e+00 # nrho drho nr dr cutoff
   46 106.40  0 dummy #Atomic_number  atomic_mass (g/cm^3) lattice_constant lattice_type
 -3.5841583313040193e-01 -3.8637819786088068e-01 -4.1422186936750144e-01 -4.4194685667729372e-01 -4.6955317478475289e-01
 -4.9704084460850834e-01 -5.2440989294799134e-01 -5.5166035244010336e-01 -5.7879226151588414e-01 -6.0580566435717942e-01
 -6.3270061085330953e-01 -6.5947715655773731e-01 -6.8613536264473618e-01 -7.1267529586605805e-01 -7.3909702850760173e-01
 -7.6540063834608063e-01 -7.9158620860569151e-01 -8.1765382791478203e-01 -8.4360359026251852e-01 -8.6943559495555534e-01
 -8.9514994657470137e-01 -9.2074675493158942e-01 -9.4622613502534358e-01 -9.7158820699924753e-01 -9.9683309609741266e-01
 -1.0219609326214463e+00 -1.0469718518871192e+00 -1.0718659941810345e+00 -1.0966435047172953e+00 -1.1213045335941727e+00
 -1.1458492357507741e+00 -1.1702777709237113e+00 -1.1945903036037686e+00 -1.2187870029925705e+00 -1.2428680429592505e+00
 -1.2668336019971183e+00 -1.2906838631803290e+00 -1.3144190141205501e+00 -1.3380392469236304e+00 -1.3615447581462676e+00
 -1.3849357487526763e+00 -1.4082124240712570e+00 -1.4313749937512632e+00 -1.4544236717194698e+00 -1.4773586761368414e+00
 -1.5001802293551996e+00 -1.5228885578738927e+00 -1.5454838922964622e+00 -1.5679664672873119e+00 -1.5903365215283749e+00
 -1.6125942976757832e+00 -1.6347400423165346e+00 -1.6567740059251610e+00 -1.6786964428203972e+00 -1.7005076111218478e+00
 -1.7222077727066565e+00 -1.7437971931661733e+00 -1.7652761417626233e+00 -1.7866448913857738e+00 -1.8079037185096041e+00
 -1.8290529031489713e+00 -1.8500927288162805e+00 -1.8710234824781518e+00 -1.8918454545120875e+00 -1.9125589386631436e+00
 -1.9331642320005937e+00 -1.9536616348745994e+00 -1.9740514508728784e+00 -1.9943339867773715e+00 -2.0145095525209120e+00
 -2.0345784611438926e+00 -2.0545410287509349e+00 -2.0743975744675551e+00 -2.0941484203968352e+00 -2.1137938915760892e+00
 -2.1333343159335305e+00 -2.1527700242449415e+00 -2.1721013500903421e+00 -2.1913286298106560e+00 -2.2104522024643796e+00
 -2.2294724097842509e+00 -2.2483895961339160e+00 -2.2672041084645986e+00 -2.2859162962717674e+00 -2.3045265115518041e+00
 -2.3230351087586723e+00 -2.3414424447605846e+00 -2.3597488787966716e+00 -2.3779547724336485e+00 -2.3960604895224860e+00
 -2.4140663961550741e+00 -2.4319728606208950e+00 -2.4497802533636879e+00 -2.4674889469381176e+00 -2.4850993159664441e+00
 -2.5026117370951892e+00 -2.5200265889518043e+00 -2.5373442521013416e+00 -2.5545651090031165e+00 -2.5716895439673815e+00
 -2.5887179431119911e+00 -2.6056506943190709e+00 -2.6224881871916845e+00 -2.6392308130105038e+00 -2.6558789646904750e+00
 -2.6724330367374871e+00 -2.6888934252050416e+00 -2.7052605276509185e+00 -2.7215347430938452e+00 -2.7377164719701654e+00
 -2.7538061160905056e+00 -2.7698040785964446e+00 -2.7857107639171810e+00 -2.8015265777262011e+00 -2.8172519268979470e+00
 -2.8328872194644861e+00 -2.8484328645721764e+00 -2.8638892724383376e+00 -2.8792568543079171e+00 -2.8945360224101582e+00
 -2.9097271899152704e+00 -2.9248307708910946e+00 -2.9398471802597723e+00 -2.9547768337544147e+00 -2.9696201478757707e+00
 -2.9843775398488912e+00 -2.9990494275798039e+00 -3.0136362296121750e+00 -3.0281383650839819e+00 -3.0425562536841784e+00
 -3.0568903156093628e+00 -3.0711409715204501e+00 -3.0853086424993341e+00 -3.0993937500055595e+00 -3.1133967158329887e+00
 -3.1273179620664706e+00 -3.1411579110385075e+00 -3.1549169852859245e+00 -3.1685956075065351e+00 -3.1821942005158137e+00
 -3.1957131872035602e+00 -3.2091529904905691e+00 -3.2225140332852962e+00 -3.2357967384405302e+00 -3.2490015287100564e+00
 -3.2621288267053292e+00 -3.2751790548521358e+00 -3.2881526353472688e+00 -3.3010499901151902e+00 -3.3138715407647017e+00
 -3.3266177085456134e+00 -3.3392889143054085e+00 -3.3518855784459167e+00 -3.3644081208799768e+00 -3.3768569609881092e+00
 -3.3892325175751807e+00 -3.4015352088270756e+00 -3.4137654522673597e+00 -3.4259236647139546e+00 -3.4380102622357986e+00
 -3.4500256601095196e+00 -3.4619702727761026e+00 -3.4738445137975562e+00 -3.4856487958135829e+00 -3.4973835304982424e+00
 -3.5090491285166272e+00 -3.5206459994815251e+00 -3.5321745519100891e+00 -3.5436351931805032e+00 -3.5550283294886555e+00
 -3.5663543658048025e+00 -3.5776137058302360e+00 -3.5888067519539564e+00 -3.5999339052093347e+00 -3.6109955652307852e+00
 -3.6219921302104314e+00 -3.6329239968547751e+00 -3.6437915603413629e+00 -3.6545952142754561e+00 -3.6653353506466977e+00
 -3.6760123597857817e+00 -3.6866266303211193e+00 -3.6971785491355083e+00 -3.7076685013228015e+00 -3.7180968701445738e+00
 -3.7284640369867899e+00 -3.7387703813164745e+00 -3.7490162806383789e+00 -3.7592021104516484e+00 -3.7693282442064922e+00
 -3.7793950532608505e+00 -3.7894029068370627e+00 -3.7993521719785339e+00 -3.8092432135064063e+00 -3.8190763939762267e+00
 -3.8288520736346099e+00 -3.8385706103759123e+00 -3.8482323596988990e+00 -3.8578376746634100e+00 -3.8673869058470278e+00
 -3.8768804013017490e+00 -3.8863185065111092e+00 -3.8957015643592432e+00 -3.9050299151302452e+00 -3.9143038965194585e+00
 -3.9235238436452269e+00 -3.9326900890606455e+00 -3.9418029627653115e+00 -3.9508627922170749e+00 -3.9598699023437884e+00
 -3.9688246155550599e+00 -3.9777272517540019e+00 -3.9865781283489827e+00 -3.9953775602653767e+00 -4.0041258599573162e+00
 -4.0128233374194417e+00 -4.0214703001986516e+00 -4.0300670534058538e+00 -4.0386138997277179e+00 -4.0471111394384236e+00
 -4.0555590704114115e+00 -4.0639579881311363e+00 -4.0723081857048147e+00 -4.0806099538741796e+00 -4.0888635810272262e+00
 -4.0970693532099665e+00 -4.1052275541381782e+00 -4.1133384652091580e+00 -4.1214023655134682e+00 -4.1294195318466906e+00
 -4.1373902387211761e+00 -4.1453147583777961e+00 -4.1531933607976930e+00 -4.1610263137140304e+00 -4.1688138826237449e+00
 -4.1765563307992952e+00 -4.1842539193004153e+00 -4.1919069069858619e+00 -4.1995155505251685e+00 -4.2070801044103954e+00
 -4.2146008209678785e+00 -4.2220779503699823e+00 -4.2295117406468483e+00 -4.2369024376981494e+00 -4.2442502853048358e+00
 -4.2515555251408914e+00 -4.2588183967850801e+00 -4.2660391377326965e+00 -4.2732179834073198e+00 -4.2803551671725639e+00
 -4.2874509203438258e+00 -4.2945054722000373e+00 -4.3015190499954183e+00 -4.3084918789712221e+00 -4.3154241823674928e+00
 -4.3223161814348119e+00 -4.3291680954460485e+00 -4.3359801417081121e+00 -4.3427525355737044e+00 -4.3494854904530662e+00
 -4.3561792178257317e+00 -4.3628339272522778e+00 -4.3694498263860737e+00 -4.3760271209850341e+00 -4.3825660149233698e+00
 -4.3890667102033349e+00 -4.3955294069669808e+00 -4.4019543035079085e+00 -4.4083415962830150e+00 -4.4146914799242456e+00
 -4.4210041472503470e+00 -4.4272797892786153e+00 -4.4335185952366487e+00 -4.4397207525740949e+00 -4.4458864469744066e+00
 -4.4520158623665900e+00 -4.4581091809369529e+00 -4.4641665831408606e+00 -4.4701882477144839e+00 -4.4761743516865478e+00
 -4.4821250703900866e+00 -4.4880405774741927e+00 -4.4939210449157656e+00 -4.4997666430312648e+00 -4.5055775404884608e+00
 -4.5113539043181836e+00 -4.5170958999260780e+00 -4.5228036911043459e+00 -4.5284774400435088e+00 -4.5341173073441468e+00
 -4.5397234520286576e+00 -4.5452960315530042e+00 -4.5508352018184652e+00 -4.5563411171833863e+00 -4.5618139304749308e+00
 -4.5672537930008312e+00 -4.5726608545611391e+00 -4.5780352634599755e+00 -4.5833771665172822e+00 -4.5886867090805747e+00
 -4.5939640350366870e+00 -4.5992092868235295e+00 -4.6044226054418349e+00 -4.6096041304669102e+00 -4.6147540000603886e+00
 -4.6198723509819795e+00 -4.6249593186012179e+00 -4.6300150369092181e+00 -4.6350396385304204e+00 -4.6400332547343472e+00
 -4.6449960154473491e+00 -4.6499280492643562e+00 -4.6548294834606327e+00 -4.6597004440035219e+00 -4.6645410555642028e+00
 -4.6693514415294368e+00 -4.6741317240133187e+00 -4.6788820238690301e+00 -4.6836024607005884e+00 -4.6882931528745955e+00
 -4.6929542175319945e+00 -4.6975857705998134e+00 -4.7021879268029210e+00 -4.7067607996757737e+00 -4.7113045015741708e+00
 -4.7158191436870025e+00 -4.7203048360479984e+00 -4.7247616875474847e+00 -4.7291898059441273e+00 -4.7335892978766898e+00
 -4.7379602688757778e+00 -4.7423028233755939e+00 -4.7466170647256885e+00 -4.7509030952027071e+00 -4.7551610160221438e+00
 -4.7593909273500925e+00 -4.7635929283149956e+00 -4.7677671170193960e+00 -4.7719135905516890e+00 -4.7760324449978686e+00
 -4.7801237754532844e+00 -4.7841876760343869e+00 -4.7882242398904840e+00 -4.7922335592154841e+00 -4.7962157252596551e+00
 -4.8001708283413693e+00 -4.8040989578588551e+00 -4.8080002023019519e+00 -4.8118746492638538e+00 -4.8157223854528679e+00
 -4.8195434967041582e+00 -4.8233380679915028e+00 -4.8271061834390387e+00 -4.8308479263330169e+00 -4.8345633791335505e+00
 -4.8382526234863672e+00 -4.8419157402345601e+00 -4.8455528094303357e+00 -4.8491639103467676e+00 -4.8527491214895475e+00
 -4.8563085206087333e+00 -4.8598421847105016e+00 -4.8633501900688980e+00 -4.8668326122375891e+00 -4.8702895260616117e+00
 -4.8737210056891236e+00 -4.8771271245831560e+00 -4.8805079555333606e+00 -4.8838635706677644e+00 -4.8871940414645207e+00
 -4.8904994387636558e+00 -4.8937798327788213e+00 -4.8970352931090479e+00 -4.9002658887504920e+00 -4.9034716881081888e+00
 -4.9066527590078035e+00 -4.9098091687073797e+00 -4.9129409839090918e+00 -4.9160482707709958e+00 -4.9191310949187805e+00
 -4.9221895214575158e+00 -4.9252236149834072e+00 -4.9282334395955418e+00 -4.9312190589076446e+00 -4.9341805360598245e+00
 -4.9371179337303284e+00 -4.9400313141472889e+00 -4.9429207391004795e+00 -4.9457862699530581e+00 -4.9486279676533265e+00
 -4.9514458927464755e+00 -4.9542401053863356e+00 -4.9570106653471306e+00 -4.9597576320352275e+00 -4.9624810645008841e+00
 -4.9651810214500056e+00 -4.9678575612558902e+00 -4.9705107419709824e+00 -4.9731406213386222e+00 -4.9757472568047971e+00
 -4.9783307055298947e+00 -4.9808910244003677e+00 -4.9834282700383419e+00 -4.9859424988059562e+00 -4.9884337668076393e+00
 -4.9909021298923006e+00 -4.9933476436555315e+00 -4.9957703634417943e+00 -4.9981703443466206e+00 -5.0005476412188017e+00
 -5.0029023086625886e+00 -5.0052344010398828e+00 -5.0075439724724333e+00 -5.0098310768440291e+00 -5.0120957678026974e+00
 -5.0143380987628934e+00 -5.0165581229076990e+00 -5.0187558931910168e+00 -5.0209314623397630e+00 -5.0230848828560646e+00
 -5.0252162070194517e+00 -5.0273254868890538e+00 -5.0294127743057953e+00 -5.0314781208945858e+00 -5.0335215780665221e+00
 -5.0355431970210747e+00 -5.0375430287482903e+00 -5.0395211240309807e+00 -5.0414775334469208e+00 -5.0434123073710397e+00
 -5.0453254959776217e+00 -5.0472171492424938e+00 -5.0490873169452257e+00 -5.0509360486713222e+00 -5.0527633938144181e+00
 -5.0545694015784726e+00 -5.0563541209799663e+00 -5.0581176008500925e+00 -5.0598598898369529e+00 -5.0615810364077563e+00
 -5.0632810888510056e+00 -5.0649600952787006e+00 -5.0666181036285272e+00 -5.0682551616660545e+00 -5.0698713169869274e+00
 -5.0714666170190661e+00 -5.0730411090248539e+00 -5.0745948401033383e+00 -5.0761278571924207e+00 -5.0776402070710560e+00
 -5.0791319363614429e+00 -5.0806030915312199e+00 -5.0820537188956623e+00 -5.0834838646198746e+00 -5.0848935747209847e+00
 -5.0862828950703411e+00 -5.0876518713957051e+00 -5.0890005492834467e+00 -5.0903289741807392e+00 -5.0916371913977549e+00
 -5.0929252461098580e+00 -5.0941931833598000e+00 -5.0954410480599144e+00 -5.0966688849943127e+00 -5.0978767388210766e+00
 -5.0990646540744535e+00 -5.1002326751670557e+00 -5.1013808463920460e+00 -5.1025092119253408e+00 -5.1036178158278007e+00
 -5.1047067020474266e+00 -5.1057759144215531e+00 -5.1068254966790452e+00 -5.1078554924424910e+00 -5.1088659452303977e+00
 -5.1098568984593848e+00 -5.1108283954463820e+00 -5.1117804794108199e+00 -5.1127131934768277e+00 -5.1136265806754269e+00
 -5.1145206839467248e+00 -5.1153955461421114e+00 -5.1162512100264523e+00 -5.1170877182802856e+00 -5.1179051135020135e+00
 -5.1187034382100993e+00 -5.1194827348452634e+00 -5.1202430457726722e+00 -5.1209844132841393e+00 -5.1217068796003185e+00
 -5.1224104868728961e+00 -5.1230952771867866e+00 -5.1237612925623308e+00 -5.1244085749574833e+00 -5.1250371662700163e+00
 -5.1256471083397068e+00 -5.1262384429505339e+00 -5.1268112118328766e+00 -5.1273654566657019e+00 -5.1279012190787654e+00
 -5.1284185406548044e+00 -5.1289174629317307e+00 -5.1293980274048270e+00 -5.1298602755289417e+00 -5.1303042487206838e+00
 -5.1307299883606161e+00 -5.1311375357954496e+00 -5.1315269323402433e+00 -5.1318982192805906e+00 -5.1322514378748219e+00
 -5.1325866293561946e+00 -5.1329038349350888e+00 -5.1332030958012025e+00 -5.1334844531257460e+00 -5.1337479480636370e+00
 -5.1339936217556961e+00 -5.1342215153308386e+00 -5.1344316699082722e+00 -5.1346241265996904e+00 -5.1347989265114666e+00
 -5.1349561107468507e+00 -5.1350957204081631e+00 -5.1352177965989867e+00 -5.1353223804263664e+00 -5.1354095130030011e+00
 -5.1354792354494370e+00 -5.1355315888962654e+00 -5.1355666144863150e+00 -5.1355843533768493e+00 -5.1355848467417582e+00
 -5.1355681357737542e+00 -5.1355342616865682e+00 -5.1354832657171405e+00 -5.1354151891278210e+00 -5.1353300732085589e+00
 -5.1352279592791010e+00 -5.1351088886911844e+00 -5.1349729028307305e+00 -5.1348200431200421e+00 -5.1346503510199977e+00
 -5.1344638680322428e+00 -5.1342606357013905e+00 -5.1340406956172115e+00 -5.1338040894168291e+00 -5.1335508587869167e+00
 -5.1332810454658899e+00 -5.1329946912461031e+00 -5.1326918379760436e+00 -5.1323725275625245e+00 -5.1320368019728813e+00
 -5.1316847032371680e+00 -5.1313162734503486e+00 -5.1309315547744934e+00 -5.1305305894409727e+00 -5.1301134197526546e+00
 -5.1296800880860962e+00 -5.1292306368937393e+00 -5.1287651087061059e+00 -5.1282835461339937e+00 -5.1277859918706667e+00
 -5.1272724886940546e+00 -5.1267430794689473e+00 -5.1261978071491834e+00 -5.1256367147798549e+00 -5.1250598454994920e+00
 -5.1244672425422655e+00 -5.1238589492401765e+00 -5.1232350090252536e+00 -5.1225954654317469e+00 -5.1219403620983233e+00
 -5.1212697427702594e+00 -5.1205836513016392e+00 -5.1198821316575449e+00 -5.1191652279162563e+00 -5.1184329842714416e+00
 -5.1176854450343541e+00 -5.1169226546360260e+00 -5.1161446576294622e+00 -5.1153514986918402e+00 -5.1145432226266960e+00
 -5.1137198743661267e+00 -5.1128814989729827e+00 -5.1120281416430595e+00 -5.1111598477072970e+00 -5.1102766626339697e+00
 -5.1093786320308876e+00 -5.1084658016475828e+00 -5.1075382173775115e+00 -5.1065959252602440e+00 -5.1056389714836623e+00
 -5.1046674023861520e+00 -5.1036812644588014e+00 -5.1026806043475901e+00 -5.1016654688555896e+00 -5.1006359049451548e+00
 -5.0995919597401178e+00 -5.0985336805279875e+00 -5.0974611147621376e+00 -5.0963743100640064e+00 -5.0952733142252900e+00
 -5.0941581752101364e+00 -5.0930289411572511e+00 -5.0918856603796989e+00 -5.0907283813588409e+00 -5.0895571527359733e+00
 -5.0883720233038723e+00 -5.0871730419983381e+00 -5.0859602578897434e+00 -5.0847337201745786e+00 -5.0834934781669947e+00
 -5.0822395812903549e+00 -5.0809720790687765e+00 -5.0796910211186779e+00 -5.0783964571403235e+00 -5.0770884369093707e+00
 -5.0757670102684180e+00 -5.0744322271185451e+00 -5.0730841374108655e+00 -5.0717227911380673e+00 -5.0703482383259617e+00
 -5.0689605290250279e+00 -5.0675597133019599e+00 -5.0661458412312124e+00 -5.0647189628865448e+00 -5.0632791283325709e+00
 -5.0618263876163008e+00 -5.0603607907586881e+00 -5.0588823877461788e+00 -5.0573912285222518e+00 -5.0558873629789689e+00
 -5.0543708409485202e+00 -5.0528417121947697e+00 -5.0513000264047987e+00 -5.0497458331804559e+00 -5.0481791820299016e+00
 -5.0466001223591510e+00 -5.0450087034636253e+00 -5.0434049745196941e+00 -5.0417889845762200e+00 -5.0401607825461099e+00
 -5.0385204171978550e+00 -5.0368679371470808e+00 -5.0352033908480909e+00 -5.0335268265854136e+00 -5.0318382924653484e+00
 -5.0301378364075102e+00 -5.0284255061363776e+00 -5.0267013491728374e+00 -5.0249654128257299e+00 -5.0232177441833956e+00
 -5.0214583901052228e+00 -5.0196873972131906e+00 -5.0179048118834162e+00 -5.0161106802377011e+00 -5.0143050481350757e+00
 -5.0124879611633473e+00 -5.0106594646306446e+00 -5.0088196035569652e+00 -5.0069684226657163e+00 -5.0051059663752699e+00
 -5.0032322787904988e+00 -5.0013474036943304e+00 -4.9994513845392881e+00 -4.9975442644390382e+00 -4.9956260861599358e+00
 -4.9936968921125722e+00 -4.9917567243433201e+00 -4.9898056245258768e+00 -4.9878436339528145e+00 -4.9858707935271234e+00
 -4.9838871437537575e+00 -4.9818927247311837e+00 -4.9798875761429224e+00 -4.9778717372491004e+00 -4.9758452468779879e+00
 -4.9738081434175534e+00 -4.9717604648070051e+00 -4.9697022485283346e+00 -4.9676335315978690e+00 -4.9655543505578112e+00
 -4.9634647414677886e+00 -4.9613647398963989e+00 -4.9592543809127552e+00 -4.9571336990780317e+00 -4.9550027284370115e+00
 -4.9528615025096308e+00 -4.9507100542825251e+00 -4.9485484162005751e+00 -4.9463766201584516e+00 -4.9441946974921667e+00
 -4.9420026789706109e+00 -4.9398005947871066e+00 -4.9375884745509513e+00 -4.9353663472789622e+00 -4.9331342413870232e+00
 -4.9308921846816327e+00 -4.9286402043514457e+00 -4.9263783269588242e+00 -4.9241065784313784e+00 -4.9218249840535169e+00
 -4.9195335684579904e+00 -4.9172323556174362e+00 -4.9149213688359286e+00 -4.9126006307405197e+00 -4.9102701632727888e+00
 -4.9079299876803884e+00 -4.9055801245085853e+00 -4.9032205935918158e+00 -4.9008514140452206e+00 -4.8984726042561988e+00
 -4.8960841818759517e+00 -4.8936861638110258e+00 -4.8912785662148650e+00 -4.8888614044793481e+00 -4.8864346932263434e+00
 -4.8839984462992465e+00 -4.8815526767545343e+00 -4.8790973968533029e+00 -4.8766326180528212e+00 -4.8741583509980710e+00
 -4.8716746055132951e+00 -4.8691813905935435e+00 -4.8666787143962180e+00 -4.8641665842326223e+00 -4.8616450065595007e+00
 -4.8591139869705895e+00 -4.8565735301881636e+00 -4.8540236400545771e+00 -4.8514643195238145e+00 -4.8488955706530339e+00
 -4.8463173945941129e+00 -4.8437297915851962e+00 -4.8411327609422408e+00 -4.8385263010505604e+00 -4.8359104093563738e+00
 -4.8332850823583486e+00 -4.8306503155991489e+00 -4.8280061036569792e+00 -4.8253524401371344e+00 -4.8226893176635404e+00
 -4.8200167278703017e+00 -4.8173346613932519e+00 -4.8146431078614924e+00 -4.8119420558889425e+00 -4.8092314930658864e+00
 -4.8065114059505154e+00 -4.8037817800604765e+00 -4.8010425998644184e+00 -4.7982938487735352e+00 -4.7955355091331135e+00
 -4.7927675622140820e+00 -4.7899899882045496e+00 -4.7872027662013572e+00 -4.7844058742016244e+00 -4.7815992890942907e+00
 -4.7787829866516640e+00 -4.7759569415209668e+00 -4.7731211272158838e+00 -4.7702755161081019e+00 -4.7674200794188639e+00
 -4.7645547872105070e+00 -4.7616796083780155e+00 -4.7587945106405618e+00 -4.7558994605330529e+00 -4.7529944233976797e+00
 -4.7500793633754599e+00 -4.7471542433977847e+00 -4.7442190251779630e+00 -4.7412736692027719e+00 -4.7383181347239978e+00
 -4.7353523797499850e+00 -4.7323763610371818e+00 -4.7293900340816828e+00 -4.7263933531107805e+00 -4.7233862710745065e+00
 -4.7203687396371805e+00 -4.7173407091689530e+00 -4.7143021287373559e+00 -4.7112529460988428e+00 -4.7081931076903398e+00
 -4.7051225586207899e+00 -4.7020412426626956e+00 -4.6989491022436702e+00 -4.6958460784379810e+00 -4.6927321109580946e+00
 -4.6896071381462239e+00 -4.6864710969658745e+00 -4.6833239229933881e+00 -4.6801655504094928e+00 -4.6769959119908444e+00
 -4.6738149391015753e+00 -4.6706225616848398e+00 -4.6674187082543579e+00 -4.6642033058859660e+00 -4.6609762802091570e+00
 -4.6577375553986320e+00 -4.6544870541658412e+00 -4.6512246977505312e+00 -4.6479504059122947e+00 -4.6446640969221118e+00
 -4.6413656875538960e+00 -4.6380550930762769e+00 -4.6347322272504110e+00 -4.6313970023431299e+00 -4.6280493291461182e+00
 -4.6246891169953308e+00 -4.6213162737904048e+00 -4.6179307060140751e+00 -4.6145323187515874e+00 -4.6111210157101112e+00
 -4.6076966992381587e+00 -4.6042592703449916e+00 -4.6008086287200411e+00 -4.5973446727523193e+00 -4.5938672995498342e+00
 -4.5903764049590032e+00 -4.5868718835840658e+00 -4.5833536288065009e+00 -4.5798215328044378e+00 -4.5762754865720741e+00
 -4.5727153799390834e+00 -4.5691411015900361e+00 -4.5655525390838090e+00 -4.5619495788730022e+00 -4.5583321063233502e+00
 -4.5547000057331388e+00 -4.5510531603526179e+00 -4.5473914524034136e+00 -4.5437147630979471e+00 -4.5400229726588455e+00
 -4.5363159603383538e+00 -4.5325936044377535e+00 -4.5288557823267741e+00 -4.5251023704630082e+00 -4.5213332444113234e+00
 -4.5175482788632797e+00 -4.5137473476565413e+00 -4.5099303237942907e+00 -4.5060970794646424e+00 -4.5022474860600603e+00
 -4.4983814141967660e+00 -4.4944987337341598e+00 -4.4905993137942266e+00 -4.4866830227809587e+00 -4.4827497283997637e+00
 -4.4787992976768782e+00 -4.4748315969787882e+00 -4.4708464920316366e+00 -4.4668438479406394e+00 -4.4628235292095004e+00
 -4.4587853997598268e+00 -4.4547293229505378e+00 -4.4506551615972851e+00 -4.4465627779918631e+00 -4.4424520339216231e+00
 -4.4383227906888898e+00 -4.4341749091303715e+00 -4.4300082496365789e+00 -4.4258226721712344e+00 -4.4216180362906901e+00
 -4.4173942011633391e+00 -4.4131510255890314e+00 -4.4088883680184852e+00 -4.4046060865727057e+00 -4.4003040390623944e+00
 -4.3959820830073664e+00 -4.3916400756559613e+00 -4.3872778740044609e+00 -4.3828953348165012e+00 -4.3784923146424868e+00
 -4.3740686698390032e+00 -4.3696242565882351e+00 -4.3651589309173762e+00 -4.3606725487180453e+00 -4.3561649657657000e+00
 -4.3516360377390519e+00 -4.3470856202394774e+00 -4.3425135688104364e+00 -4.3379197389568818e+00 -4.3333039861646760e+00
 -4.3286661659200050e+00 -4.3240061337287923e+00 -4.3193237451361117e+00 -4.3146188557456044e+00 -4.3098913212388874e+00
 -4.3051409973949735e+00 -4.3003677401096843e+00 -4.2955714054150596e+00 -4.2907518494987773e+00 -4.2859089287235639e+00
 -4.2810424996466105e+00 -4.2761524190389846e+00 -4.2712385439050475e+00 -4.2663007315018637e+00 -4.2613388393586193e+00
 -4.2563527252960354e+00 -4.2513422474457796e+00 -4.2463072642698805e+00 -4.2412476345801462e+00 -4.2361632175575723e+00
 -4.2310538727717599e+00 -4.2259194602003278e+00 -4.2207598402483271e+00 -4.2155748737676557e+00 -4.2103644220764735e+00
 -4.2051283469786114e+00 -4.1998665107829920e+00 -4.1945787763230395e+00 -4.1892650069760942e+00 -4.1839250666828285e+00
 -4.1785588199666588e+00 -4.1731661319531606e+00 -4.1677468683894823e+00 -4.1623008956637593e+00 -4.1568280808245275e+00
 -4.1513282916001391e+00 -4.1458013964181735e+00 -4.1402472644248567e+00 -4.1346657655044687e+00 -4.1290567702987619e+00
 -4.1234201502263756e+00 -4.1177557775022455e+00 -4.1120635251570237e+00 -4.1063432670564879e+00 -4.1005948779209582e+00
 -4.0948182333447107e+00 -4.0890132098153913e+00 -4.0831796847334294e+00 -4.0773175364314511e+00 -4.0714266441936955e+00
 -4.0655068882754275e+00 -4.0595581499223536e+00 -4.0535803113900313e+00 -4.0475732559632878e+00 -4.0415368679756334e+00
 -4.0354710328286725e+00 -4.0293756370115226e+00 -4.0232505681202220e+00 -4.0170957148771498e+00 -4.0109109671504379e+00
 -4.0046962159733832e+00 -3.9984513535638642e+00 -3.9921762733437531e+00 -3.9858708699583314e+00 -3.9795350392957038e+00
 -3.9731686785062110e+00 -3.9667716860218447e+00 -3.9603439615756617e+00 -3.9538854062211972e+00 -3.9473959223518804e+00
 -3.9408754137204474e+00 -3.9343237854583544e+00 -3.9277409440951936e+00 -3.9211267975781063e+00 -3.9144812552911974e+00
 -3.9078042280749483e+00 -3.9010956282456331e+00 -3.8943553696147295e+00 -3.8875833675083373e+00 -3.8807795387865869e+00
 -3.8739438018630592e+00 -3.8670760767241941e+00 -3.8601762849487096e+00 -3.8532443497270119e+00 -3.8462801958806119e+00
 -3.8392837498815382e+00 -3.8322549398717509e+00 -3.8251936956825565e+00 -3.8180999488540222e+00 -3.8109736326543882e+00
 -3.8038146820994831e+00 -3.7966230339721392e+00 -3.7893986268416029e+00 -3.7821414010829519e+00 -3.7748512988965093e+00
 -3.7675282643272556e+00 -3.7601722432842437e+00 -3.7527831835600134e+00 -3.7453610348500055e+00 -3.7379057487719742e+00
 -3.7304172788854046e+00 -3.7228955807109227e+00 -3.7153406117497121e+00 -3.7077523315029275e+00 -3.7001307014911080e+00
 -3.6924756852735925e+00 -3.6847872484679325e+00 -3.6770653587693061e+00 -3.6693099859699334e+00 -3.6615211019784901e+00
 -3.6536986808395202e+00 -3.6458426987528512e+00 -3.6379531340930091e+00 -3.6300299674286300e+00 -3.6220731815418761e+00
 -3.6140827614478499e+00 -3.6060586944140063e+00 -3.5980009699795685e+00 -3.5899095799749414e+00 -3.5817845185411263e+00
 -3.5736257821491337e+00
  1.0000000000000000e+00  9.9999990910689995e-01  1.0000000037112238e+00  1.0000002936828685e+00  1.0000008046834055e+00
  1.0000015855660727e+00  1.0000027093678092e+00  1.0000042641516329e+00  1.0000063414137026e+00  1.0000090255010428e+00
  1.0000123904761109e+00  1.0000165044282008e+00  1.0000214348189274e+00  1.0000272528715144e+00  1.0000340339637457e+00
  1.0000418554978483e+00  1.0000507946028958e+00  1.0000609265580658e+00  1.0000723250459103e+00  1.0000850631265297e+00
  1.0000992142030924e+00  1.0001148525171086e+00  1.0001320528988775e+00  1.0001508903390552e+00  1.0001714395954795e+00
  1.0001937750703380e+00  1.0002179709576795e+00  1.0002441014284889e+00  1.0002722407827322e+00  1.0003024634633035e+00
  1.0003348439827873e+00  1.0003694568444295e+00  1.0004063764878979e+00  1.0004456772979760e+00  1.0004874336380485e+00
  1.0005317198832910e+00  1.0005786104376935e+00  1.0006281797254837e+00  1.0006805021764009e+00  1.0007356522121831e+00
  1.0007937042423429e+00  1.0008547326692401e+00  1.0009188118944408e+00  1.0009860163239446e+00  1.0010564203686640e+00
  1.0011300984419069e+00  1.0012071249566596e+00  1.0012875743237240e+00  1.0013715209520144e+00  1.0014590392497111e+00
  1.0015502036253987e+00  1.0016450884886519e+00  1.0017437682497414e+00  1.0018463173191277e+00  1.0019528101069959e+00
  1.0020633210231114e+00  1.0021779244769931e+00  1.0022966948781329e+00  1.0024197066361749e+00  1.0025470341609315e+00
  1.0026787518622977e+00  1.0028149341501584e+00  1.0029556554343240e+00  1.0031009901245398e+00  1.0032510126305252e+00
  1.0034057973620123e+00  1.0035654187287655e+00  1.0037299511405740e+00  1.0038994690072349e+00  1.0040740467385401e+00
  1.0042537587442693e+00  1.0044386794341917e+00  1.0046288832180701e+00  1.0048244445056638e+00  1.0050254377067334e+00
  1.0052319372310501e+00  1.0054440174884005e+00  1.0056617528885878e+00  1.0058852178414164e+00  1.0061144867566680e+00
  1.0063496340440823e+00  1.0065907341133606e+00  1.0068378613742122e+00  1.0070910902364094e+00  1.0073504951098322e+00
  1.0076161504044301e+00  1.0078881305301042e+00  1.0081665098965769e+00  1.0084513629133176e+00  1.0087427639896922e+00
  1.0090407875352547e+00  1.0093455079600422e+00  1.0096569996746516e+00  1.0099753370897613e+00  1.0103005946154369e+00
  1.0106328466604859e+00  1.0109721676325807e+00  1.0113186319395964e+00  1.0116723139912402e+00  1.0120332882003498e+00
  1.0124016289818114e+00  1.0127774107490999e+00  1.0131607079105085e+00  1.0135515948669513e+00  1.0139501460163240e+00
  1.0143564357620016e+00  1.0147705385214123e+00  1.0151925287282653e+00  1.0156224808186600e+00  1.0160604692108517e+00
  1.0165065682864962e+00  1.0169608523942226e+00  1.0174233958885657e+00  1.0178942731773566e+00  1.0183735587594960e+00
  1.0188613271935001e+00  1.0193576529968227e+00  1.0198626105361486e+00  1.0203762739634936e+00  1.0208987173430388e+00
  1.0214300148983815e+00  1.0219702412620009e+00  1.0225194715400285e+00  1.0230777809081675e+00  1.0236452440229327e+00
  1.0242219344760375e+00  1.0248079248983060e+00  1.0254032880923778e+00  1.0260080984115156e+00  1.0266224328585392e+00
  1.0272463701707286e+00  1.0278799878906923e+00  1.0285233591745682e+00  1.0291765509329227e+00  1.0298396275208415e+00
  1.0305126579314843e+00  1.0311957230540165e+00  1.0318889175580224e+00  1.0325923381372260e+00  1.0333060663800764e+00
  1.0340301528956939e+00  1.0347646203370910e+00  1.0355094963561002e+00  1.0362648537183397e+00  1.0370308422756527e+00
  1.0378076623422565e+00  1.0385954794745944e+00  1.0393943316091570e+00  1.0402040749738091e+00  1.0410244914472815e+00
  1.0418554978484011e+00  1.0426973570983227e+00  1.0435507330456308e+00  1.0444163484292384e+00  1.0452944865152616e+00
  1.0461845292573670e+00  1.0470850452543861e+00  1.0479947485407679e+00  1.0489136656912128e+00  1.0498440660266750e+00
  1.0507896870201594e+00  1.0517532549023134e+00  1.0527337829297336e+00  1.0537249977291814e+00  1.0547184628128563e+00
  1.0557096676362216e+00  1.0567041711492873e+00  1.0577191968868100e+00  1.0587736817782392e+00  1.0598737768197866e+00
  1.0609994103318119e+00  1.0621068466449319e+00  1.0631565802057346e+00  1.0641472902400182e+00  1.0651429047026921e+00
  1.0662500762509404e+00  1.0675460702406483e+00  1.0690001844576793e+00  1.0704279131813335e+00  1.0715814549250877e+00
  1.0723263002820371e+00  1.0728195072876967e+00  1.0735586991376600e+00  1.0751028901550534e+00  1.0776640408584792e+00
  1.0807213401769808e+00  1.0829935112227953e+00  1.0829781963978145e+00  9.1653491813854515e-01  9.1285922136042674e-01
  9.0885936184054039e-01  9.0453660215688669e-01  8.9989280881918432e-01  8.9493043323771748e-01  8.8965249269218327e-01
  8.8406255130053857e-01  8.7816470098784805e-01  8.7196354245513064e-01  8.6546416614820765e-01  8.5867213322654901e-01
  8.5159345653212182e-01  8.4423458155823650e-01  8.3660236741839478e-01  8.2870406781513684e-01  8.2054731200888809e-01
  8.1214008578680752e-01  8.0349071243163384e-01  7.9460783369053356e-01  7.8550039074394784e-01  7.7617760517444001e-01
  7.6664895993554283e-01  7.5692418032060549e-01  7.4701321493164163e-01  7.3692621664817559e-01  7.2667352359609050e-01
  7.1626564011647531e-01  7.0571321773447193e-01  6.9502703612812300e-01  6.8421798409721835e-01  6.7329704053214301e-01
  6.6227525538272447e-01  6.5116373062707944e-01  6.3997360124046154e-01  6.2871601616410855e-01  6.1740211927408950e-01
  6.0604303035015250e-01  5.9464982604457117e-01  5.8323352085099245e-01  5.7180504807328414e-01  5.6037524079438139e-01
  5.4895481284513514e-01  5.3755433977315814e-01  5.2618423981167295e-01  5.1485475484835941e-01  5.0357593139420098e-01
  4.9235760155233343e-01  4.8120936398689096e-01  4.7014056489185391e-01  4.5916027895989603e-01  4.4827729035123182e-01
  4.3750007366246385e-01  4.2683677489542970e-01  4.1629519242604984e-01  4.0588275797317430e-01  3.9560651756743037e-01
  3.8547311252006977e-01  3.7548876039706813e-01  3.6565923760058405e-01  3.5598987432036161e-01  3.4648556269117137e-01
  3.3715076696534485e-01  3.2798953369605072e-01  3.1900550192057131e-01  3.1020191334357849e-01  3.0158162252041043e-01
  2.9314710704034769e-01  2.8490047770988935e-01  2.7684348873602960e-01  2.6897754790953393e-01  2.6130372678821540e-01
  2.5382277088021082e-01  2.4653510982725735e-01  2.3944086758796848e-01  2.3253987262111056e-01  2.2583166806887894e-01
  2.1931552194017431e-01  2.1299043729387909e-01  2.0685516242213361e-01  2.0090820103361243e-01  1.9514782243680065e-01
  1.8957207172327020e-01  1.8417877995095627e-01  1.7896557432743326e-01  1.7392988839319148e-01  1.6906897220491315e-01
  1.6437990251874895e-01  1.5985959297359403e-01  1.5550480427436447e-01  1.5131215437527373e-01  1.4727812866310852e-01
  1.4339909014050556e-01  1.3967128960922753e-01  1.3609087585343960e-01  1.3265390582298564e-01  1.2935635481666435e-01
  1.2619412666550600e-01  1.2316306391604814e-01  1.2025895801361236e-01  1.1747755948558042e-01  1.1481458812467055e-01
  1.1226574317221361e-01  1.0982671350142975e-01  1.0749318780070433e-01  1.0526086475686441e-01  1.0312546323845501e-01
  1.0108273247901539e-01  9.9128462260355210e-02  9.7258493095831289e-02  9.5468726413623362e-02  9.3755134740010626e-02
  9.2113771882648077e-02  9.0540783113842505e-02  8.9032415353829442e-02  8.7585027354048717e-02  8.6195099878877829e-02
  8.4859245261514990e-02  8.3574211729720363e-02  8.2336881770277079e-02  8.1144269509622696e-02  7.9993518087977264e-02
  7.8881897033471260e-02  7.7806799636273502e-02  7.6765740322719253e-02  7.5756352029438062e-02  7.4776383577481870e-02
  7.3823697046452891e-02  7.2896265148631664e-02  7.1992168603104922e-02  7.1109593509893709e-02  7.0246828724081195e-02
  6.9402263229940822e-02  6.8574383515064147e-02  6.7761770944488917e-02  6.6963099134826939e-02  6.6177131328392175e-02
  6.5402717767328630e-02  6.4638793067738384e-02  6.3884373593809496e-02  6.3138554831944110e-02  6.2400508764886266e-02
  6.1669481245850019e-02  6.0944789372647357e-02  6.0225818861816147e-02  5.9512021422748168e-02  5.8802912131817056e-02
  5.8098066806506310e-02  5.7397119379537218e-02  5.6699759272996891e-02  5.6005728772466179e-02  5.5314820401147720e-02
  5.4626874293993856e-02  5.3941775571834646e-02  5.3259451715505814e-02  5.2579869939976744e-02  5.1903034568478452e-02
  5.1228984406631581e-02  5.0557790116574346e-02  4.9889551591090528e-02  4.9224395327737432e-02  4.8562471802973926e-02
  4.7903952846288338e-02  4.7249029014326462e-02  4.6597906965019559e-02  4.5950806831712300e-02  4.5307959597290767e-02
  4.4669604468310413e-02  4.4035986249124068e-02  4.3407352716009845e-02  4.2783951991299231e-02  4.2166029917504941e-02
  4.1553827431448982e-02  4.0947577938390579e-02  4.0347504686382089e-02  3.9753818266908776e-02  3.9166715263227063e-02
  3.8586378295416481e-02  3.8012976314453349e-02  3.7446664898293201e-02  3.6887586547953245e-02  3.6335870983594809e-02
  3.5791635440605811e-02  3.5254984965683210e-02  3.4726012712915449e-02  3.4204800239864927e-02  3.3691417803650425e-02
  3.3185924657029603e-02  3.2688369344481397e-02  3.2198789998288554e-02  3.1717214634619989e-02  3.1243661449613311e-02
  3.0778139115457265e-02  3.0320647076474166e-02  2.9871175845202359e-02  2.9429707298478682e-02  2.8996214973520926e-02
  2.8570664364010269e-02  2.8153013216173743e-02  2.7743211824866686e-02  2.7341203329655207e-02  2.6946924010898612e-02
  2.6560303585831904e-02  2.6181265504648180e-02  2.5809727246581128e-02  2.5445600615987475e-02  2.5088792038429428e-02
  2.4739202856757143e-02  2.4396729627191152e-02  2.4061264415404866e-02  2.3732695092606972e-02  2.3410905631623936e-02
  2.3095776402982431e-02  2.2787184470991793e-02  2.2485003889826487e-02  2.2189105999608542e-02  2.1899359722490040e-02
  2.1615631858735520e-02  2.1337787382804480e-02  2.1065689739433808e-02  2.0799201139720228e-02  2.0538182857202786e-02
  2.0282495523945267e-02  2.0031999426618676e-02  1.9786554802583678e-02  1.9546022135973066e-02  1.9310262453774193e-02
  1.9079137621911459e-02  1.8852510641328729e-02  1.8630245944071810e-02  1.8412209689370910e-02  1.8198270059723066e-02
  1.7988297556959212e-02  1.7782165286187274e-02  1.7579749119718813e-02  1.7380927705032124e-02  1.7185582442728102e-02
  1.6993597464194817e-02  1.6804859609272020e-02  1.6619258403915711e-02  1.6436686037862663e-02  1.6257037342294989e-02
  1.6080209767504659e-02  1.5906103360558057e-02  1.5734620742960528e-02  1.5565667088320901e-02  1.5399150100016058e-02
  1.5234979988855457e-02  1.5073069450745682e-02  1.4913333644354985e-02  1.4755690168777834e-02  1.4600059041199447e-02
  1.4446362674560335e-02  1.4294525855220860e-02  1.4144475720625754e-02  1.3996141736968681e-02  1.3849455676856776e-02
  1.3704351596975178e-02  1.3560765815751583e-02  1.3418636891020788e-02  1.3277905597689221e-02  1.3138514905399499e-02
  1.3000409956194964e-02  1.2863538042184222e-02  1.2727848583205692e-02  1.2593293104492148e-02  1.2459825214335259e-02
  1.2327400581750133e-02  1.2195976914139865e-02  1.2065513934960064e-02  1.1935973361383422e-02  1.1807318881964228e-02
  1.1679516134302934e-02  1.1552532682710680e-02  1.1426337995873856e-02  1.1300903424518623e-02  1.1176202179075473e-02
  1.1052209307343767e-02  1.0928901672156269e-02  1.0806257929043708e-02  1.0684258503899298e-02  1.0562885570643296e-02
  1.0442123028887544e-02  1.0321956481600007e-02  1.0202373212769315e-02  1.0083362165069309e-02  9.9649139175235872e-03
  9.8470206631700394e-03  9.7296761867253952e-03  9.6128758422497698e-03  9.4966165308103846e-03  9.3808966771954071e-03
  9.2657161963685709e-03  9.1510764456853542e-03  9.0369801741559432e-03  8.9234314716740894e-03  8.8104357182459871e-03
  8.6979995332191317e-03  8.5861307245111915e-03  8.4748382378388720e-03  8.3641321059467789e-03  8.2540233978362961e-03
  8.1445241679944380e-03  8.0356474056227263e-03  7.9274069838660526e-03  7.8198176090415444e-03  7.7128947698674333e-03
  7.6066546866919230e-03  7.5011142607220496e-03  7.3962910232525571e-03  7.2922030848947567e-03  7.1888690848053985e-03
  7.0863081399155318e-03  6.9845397941593786e-03  6.8835839677031975e-03  6.7834609061741494e-03  6.6841911298891618e-03
  6.5857953830838027e-03  6.4882945831411390e-03  6.3917097698206098e-03  6.2960620544868879e-03  6.2013725693387499e-03
  6.1076624166379392e-03  6.0149526179380363e-03  5.9232640633133261e-03  5.8326174605876566e-03  5.7430332845633154e-03
  5.6545317262498927e-03  5.5671326420931415e-03  5.4808555032038559e-03  5.3957193445867300e-03  5.3117427143692239e-03
  5.2289436230304343e-03  5.1473394926299602e-03  5.0669471060367658e-03  4.9877825561580515e-03  4.9098611951681201e-03
  4.8331975837372409e-03  4.7578054402605150e-03  4.6836975900867491e-03  4.6108859147473147e-03  4.5393813011850165e-03
  4.4691935909829620e-03  4.4003315295934259e-03  4.3328027155667137e-03  4.2666135497800347e-03  4.2017691846663640e-03
  4.1382734734433093e-03  4.0761289193434139e-03  4.0153366274806781e-03  3.9558962878357236e-03  3.8978062043742122e-03
  3.8410633344707198e-03  3.7856633284725797e-03  3.7316005692637254e-03  3.6788682118285357e-03  3.6274582228156757e-03
  3.5773614201019435e-03  3.5285675123561118e-03  3.4810651386027714e-03  3.4348419077861749e-03  3.3898844383340814e-03
  3.3461783977215983e-03  3.3037085420350261e-03  3.2624587555357002e-03  3.2224120902238375e-03  3.1835508054023766e-03
  3.1458564072408234e-03  3.1093096883390943e-03  3.0738907672913582e-03  3.0395791282498835e-03  3.0063536604888765e-03
  2.9741926979683312e-03  2.9430740588978661e-03  2.9129750853005738e-03  2.8838726825768596e-03  2.8557433590682899e-03
  2.8285632656214299e-03  2.8023082351516931e-03  2.7769538222071804e-03  2.7524753425325252e-03  2.7288479126327380e-03
  2.7060464893370489e-03  2.6840459093627495e-03  2.6628209288790403e-03  2.6423462630708701e-03  2.6225966257027826e-03
  2.6035467686827581e-03  2.5851715216260581e-03  2.5674458314190684e-03  2.5503448017831420e-03  2.5338437328384436e-03
  2.5179181606677934e-03  2.5025438968805094e-03  2.4876970681762516e-03  2.4733541559088649e-03  2.4594920356502247e-03
  2.4460880167540781e-03  2.4331198819198866e-03  2.4205659267566748e-03  2.4084049993468668e-03  2.3966165398101365e-03
  2.3851806198672450e-03  2.3740779824038892e-03  2.3632900810345425e-03  2.3527991196662982e-03  2.3425880920622151e-03
  2.3326408198400452e-03  2.3229419702479664e-03  2.3134770419087482e-03  2.3042323428642919e-03  2.2951949684982707e-03
  2.2863527794587711e-03  2.2776943795809320e-03  2.2692090938095854e-03  2.2608869461218980e-03  2.2527186374500102e-03
  2.2446955236036792e-03  2.2368095931929151e-03  2.2290534455506258e-03  2.2214202686552547e-03  2.2139038170534233e-03
  2.2064983897825689e-03  2.1991988082935882e-03  2.1920003943734752e-03  2.1848989480679638e-03  2.1778907256041666e-03
  2.1709724173132163e-03  2.1641411255529058e-03  2.1573943426303295e-03  2.1507299287245219e-03  2.1441460898091007e-03
  2.1376413555749059e-03  2.1312145573526386e-03  2.1248648060355054e-03  2.1185914700018555e-03  2.1123941530378229e-03
  2.1062726722599658e-03  2.1002270360379080e-03  2.0942574219169792e-03  2.0883641545408559e-03  2.0825476835742000e-03
  2.0768085616253021e-03  2.0711474221687194e-03  2.0655649574679177e-03  2.0600618964979121e-03  2.0546389828679061e-03
  2.0492969527439336e-03  2.0440365127714979e-03  2.0388583179982134e-03  2.0337629497964465e-03  2.0287508937859534e-03
  2.0238225177565245e-03  2.0189780495906214e-03  2.0142175551860196e-03  2.0095409163784477e-03  2.0049478088642290e-03
  2.0004376801229210e-03  1.9960097273399565e-03  1.9916628753292834e-03  1.9873957544560067e-03  1.9832066785590275e-03
  1.9790936228736835e-03  1.9750542019543902e-03  1.9710856475974310e-03  1.9671847876362916e-03  1.9633480371101498e-03
  1.9595714103762978e-03  1.9558505386355748e-03  1.9521806875568654e-03  1.9485567749016051e-03  1.9449733881482807e-03
  1.9414248021169327e-03  1.9379049965936584e-03  1.9344076739551126e-03  1.9309262767930112e-03  1.9274540055386324e-03
  1.9239838360873194e-03  1.9205085374229824e-03  1.9170206892426009e-03  1.9135126995807258e-03  1.9099768224339815e-03
  1.9064051753855682e-03  1.9027897572297639e-03  1.8991224655964271e-03  1.8953951145754984e-03  1.8915994523415029e-03
  1.8877271787780525e-03  1.8837699631023479e-03  1.8797194614896806e-03  1.8755673346979361e-03  1.8713052656920946e-03
  1.8669249772687341e-03  1.8624182496805328e-03  1.8577769382607701e-03  1.8529929910478303e-03  1.8480584664097037e-03
  1.8429655506684891e-03  1.8377065757248963e-03  1.8322740366827478e-03  1.8266606094734811e-03  1.8208591684806513e-03
  1.8148628041644325e-03  1.8086648406861207e-03  1.8022588535326358e-03  1.7956386871410236e-03  1.7887984725229581e-03
  1.7817326448892436e-03  1.7744359612743173e-03  1.7669035181607506e-03  1.7591307691037523e-03  1.7511135423556700e-03
  1.7428480584904928e-03  1.7343309480283532e-03  1.7255592690600292e-03  1.7165305248714473e-03  1.7072426815681831e-03
  1.6976941856999650e-03  1.6878839818851754e-03  1.6778115304353542e-03  1.6674768249796991e-03  1.6568804100895690e-03
  1.6460233989029295e-03  1.6349074900423358e-03  1.6235349735191106e-03  1.6119087167087466e-03  1.6000321447924635e-03
  1.5879092210825231e-03  1.5755444273475438e-03  1.5629427441378146e-03  1.5501096311106102e-03  1.5370510073555051e-03
  1.5237732317196885e-03  1.5102830831332790e-03  1.4965877409346383e-03  1.4826947651956860e-03  1.4686120770472154e-03
  1.4543479390042061e-03  1.4399109352911399e-03  1.4253099521673144e-03  1.4105541582521588e-03  1.3956529848505466e-03
  1.3806161062781123e-03  1.3654534201865637e-03  1.3501750278889985e-03  1.3347912146852172e-03  1.3193124301870388e-03
  1.3037492686436142e-03  1.2881124492667422e-03  1.2724127965561825e-03  1.2566612206249710e-03  1.2408686975247348e-03
  1.2250462495710058e-03  1.2092049256685355e-03  1.1933557816366101e-03  1.1775098605343642e-03  1.1616781729860957e-03
  1.1458716775065809e-03  1.1301012608263882e-03  1.1143777182171925e-03  1.0987117338170905e-03  1.0831138609559152e-03
  1.0675945024805496e-03  1.0521638910802426e-03  1.0368320696119212e-03  1.0216088714255082e-03  1.0065039006892339e-03
  9.9152651271495204e-04  9.7668579428345469e-04  9.6199054396978536e-04  9.4744925246855469e-04  9.3307008291925472e-04
  9.1886085123157337e-04  9.0482900641070878e-04  8.9098161088268396e-04  8.7732532081966151e-04  8.6386636646525823e-04
  8.5061053245985888e-04  8.3756313816593187e-04  8.2472901799334288e-04  8.1211250172468646e-04  7.9971739539726444e-04
  7.8754697174706993e-04  7.7560397915353563e-04  7.6389065610006233e-04  7.5240874576666499e-04  7.4115951062261951e-04
  7.3014374701910959e-04  7.1936179978187328e-04  7.0881357680384956e-04  6.9849856363782519e-04  6.8841583808908115e-04
  6.7856408480803949e-04  6.6894160988291017e-04  6.5954635543233700e-04  6.5037591419804541e-04  6.4142754413748808e-04
  6.3269818301649216e-04  6.2418446300190587e-04  6.1588272525424522e-04  6.0778903452034022e-04  5.9989919372598218e-04
  5.9220875856857026e-04  5.8471305210975764e-04  5.7740717936809866e-04  5.7028604191169529e-04  5.6334435245084414e-04
  5.5657664943068233e-04  5.4997731162383513e-04  5.4354057272306203e-04  5.3726053593390372e-04  5.3113118856732799e-04
  5.2514641663237768e-04  5.1930001942881640e-04  5.1358572413977537e-04  5.0799720042440022e-04  5.0252807501049773e-04
  4.9717194628718243e-04  4.9192239889752276e-04  4.8677301833118886e-04  4.8171740551709809e-04  4.7674919141606231e-04
  4.7186205161343442e-04  4.6704972091175519e-04  4.6230600792339946e-04  4.5762480966322336e-04  4.5300012614121055e-04
  4.4842607495511929e-04  4.4389690588312859e-04  4.3940701547648544e-04  4.3495096165215101e-04  4.3052347828544758e-04
  4.2611948980270532e-04  4.2173412577390843e-04  4.1736273550534235e-04  4.1300090263224028e-04  4.0864445971142978e-04
  4.0428950281397926e-04  3.9993240611784251e-04  3.9556983618937948e-04  3.9119876036194646e-04  3.8681644289792927e-04
  3.8242043724266147e-04  3.7800857817221100e-04  3.7357897394116682e-04  3.6912999843042535e-04  3.6466028329497737e-04
  3.6016871011169428e-04  3.5565440252711484e-04  3.5111671840523174e-04  3.4655524197527827e-04  3.4196977597951477e-04
  3.3736033382101530e-04  3.3272713171145424e-04  3.2807058081889289e-04  3.2339127941556606e-04  3.1869000502566852e-04
  3.1396770657314186e-04  3.0922549652946083e-04  3.0446464306142004e-04  2.9968656217892067e-04  2.9489280988275683e-04
  2.9008507431240219e-04  2.8526516789379678e-04  2.8043501948713347e-04  2.7559666653464434e-04  2.7075224720838768e-04
  2.6590399255803430e-04  2.6105421865865405e-04  2.5620531875850279e-04  2.5135975542680855e-04  2.4652005270155847e-04
  2.4168878823728512e-04  2.3686858545285321e-04  2.3206210567924631e-04  2.2727204030735317e-04  2.2250110293575451e-04
  2.1775202151850962e-04  2.1302753051294276e-04  2.0833036302742995e-04  2.0366324296918555e-04  1.9902887719204867e-04
  1.9442994764426994e-04  1.8986910351629811e-04  1.8534895338856647e-04  1.8087205737927963e-04  1.7644091929219999e-04
  1.7205797876443442e-04  1.6772560341422071e-04  1.6344608098871436e-04  1.5922161151177505e-04  1.5505429943175322e-04
  1.5094614576927664e-04  1.4689904026503721e-04  1.4291475352757720e-04  1.3899492918107624e-04  1.3514107601313765e-04
  1.3135456026113892e-04  1.2763660080989766e-04  1.2398827083644811e-04  1.2041050166658113e-04  1.1690408669913468e-04
  1.1346968533028419e-04  1.1010782687783303e-04  1.0681891450550292e-04  1.0360322914722435e-04  1.0046093343142707e-04
  9.7392075605330392e-05  9.4396593459233764e-05  9.1474318250807122e-05  8.8624978629381319e-05  8.5848204560238562e-05
  8.3143531248902860e-05  8.0510403065430424e-05  7.7948177468700169e-05  7.5456128930704008e-05  7.3033452860837362e-05
  7.0679269530189677e-05  6.8392627995834661e-05  6.6172510025120881e-05  6.4017834019962082e-05  6.1927458941127687e-05
  5.9900188232533217e-05  5.7934773745530678e-05  5.6029919663198990e-05  5.4184286424634493e-05  5.2396494649241317e-05
  5.0665129061021775e-05  4.8988742412866887e-05  4.7365859410846746e-05  4.5794980638500933e-05  4.4274586481129018e-05
  4.2803141050080947e-05  4.1379096107047394e-05  4.0000894988350341e-05  3.8666976529233411e-05  3.7375778988152331e-05
  3.6125743971065333e-05  3.4915320355723571e-05  3.3742968215961605e-05  3.2607162745987850e-05  3.1506398184674882e-05
  3.0439191739849961e-05  2.9404087512585522e-05  2.8399660421489411e-05  2.7424520126995497e-05  2.6477314955654002e-05
  2.5556735824421993e-05  2.4661520164953767e-05  2.3790455847891282e-05  2.2942385107154619e-05  2.2116208464232343e-05
  2.1310888652472054e-05  2.0525454541370699e-05  1.9759005060865025e-05  1.9010713055190407e-05  1.8279827493226416e-05
  1.7565671782938446e-05  1.6867640653260381e-05  1.6185196986705615e-05  1.5517868651978090e-05  1.4865245336583327e-05
  1.4226975379439457e-05  1.3602762603488255e-05  1.2992363148306186e-05  1.2395582302715414e-05  1.1812271337394855e-05
  1.1242324337491208e-05  1.0685675035229979e-05  1.0142293642526517e-05  9.6121836835970585e-06  9.0953788275697437e-06
  8.5919397210956599e-06  8.1019508209598836e-06  7.6255172266924830e-06  7.1627615131795904e-06  6.7138205632744058e-06
  6.2788424004082457e-06  5.8579830212015725e-06  5.4514032280750169e-06  5.0592654618604355e-06  4.6817306344119244e-06
  4.3189549612168524e-06  3.9710867940069009e-06  3.6382634533691072e-06  3.3206080613568731e-06  3.0182263741010175e-06
  2.7312036144208034e-06  2.4596013044349732e-06  2.2034540981727730e-06  1.9627666141850008e-06  1.7375102681550344e-06
  1.5276201055098596e-06  1.3329916340310943e-06  1.1534776564660505e-06  9.8888510313874551e-07  8.3897186456093946e-07
  7.0344362404316371e-07  5.8195069030578584e-07  4.7408483008997318e-07  3.7937610076881225e-07  2.9728968295827563e-07
  2.2722271312828720e-07  1.6850111621374663e-07  1.2037643822556066e-07  8.2022678861698174e-08  5.2533124118174024e-08
  3.0917178900131162e-08  1.6097199632858386e-08  6.9053268728080930e-09  2.0803179186614559e-09  2.6437942232584305e-10
  0.0000000000000000e+00
   46 106.40  0 dummy #Atomic_number  atomic_mass (g/cm^3) lattice_constant lattice_type
 -3.5841583313040193e-01 -3.8637819786088068e-01 -4.1422186936750144e-01 -4.4194685667729372e-01 -4.6955317478475289e-01
 -4.9704084460850834e-01 -5.2440989294799134e-01 -5.5166035244010336e-01 -5.7879226151588414e-01 -6.0580566435717942e-01
 -6.3270061085330953e-01 -6.5947715655773731e-01 -6.8613536264473618e-01 -7.1267529586605805e-01 -7.3909702850760173e-01
 -7.6540063834608063e-01 -7.9158620860569151e-01 -8.1765382791478203e-01 -8.4360359026251852e-01 -8.6943559495555534e-01
 -8.9514994657470137e-01 -9.2074675493158942e-01 -9.4622613502534358e-01 -9.7158820699924753e-01 -9.9683309609741266e-01
 -1.0219609326214463e+00 -1.0469718518871192e+00 -1.0718659941810345e+00 -1.0966435047172953e+00 -1.1213045335941727e+00
 -1.1458492357507741e+00 -1.1702777709237113e+00 -1.1945903036037686e+00 -1.2187870029925705e+00 -1.2428680429592505e+00
 -1.2668336019971183e+00 -1.2906838631803290e+00 -1.3144190141205501e+00 -1.3380392469236304e+00 -1.3615447581462676e+00
 -1.3849357487526763e+00 -1.4082124240712570e+00 -1.4313749937512632e+00 -1.4544236717194698e+00 -1.4773586761368414e+00
 -1.5001802293551996e+00 -1.5228885578738927e+00 -1.5454838922964622e+00 -1.5679664672873119e+00 -1.5903365215283749e+00
 -1.6125942976757832e+00 -1.6347400423165346e+00 -1.6567740059251610e+00 -1.6786964428203972e+00 -1.7005076111218478e+00
 -1.7222077727066565e+00 -1.7437971931661733e+00 -1.7652761417626233e+00 -1.7866448913857738e+00 -1.8079037185096041e+00
 -1.8290529031489713e+00 -1.8500927288162805e+00 -1.8710234824781518e+00 -1.8918454545120875e+00 -1.9125589386631436e+00
 -1.9331642320005937e+00 -1.9536616348745994e+00 -1.9740514508728784e+00 -1.9943339867773715e+00 -2.0145095525209120e+00
 -2.0345784611438926e+00 -2.0545410287509349e+00 -2.0743975744675551e+00 -2.0941484203968352e+00 -2.1137938915760892e+00
 -2.1333343159335305e+00 -2.1527700242449415e+00 -2.1721013500903421e+00 -2.1913286298106560e+00 -2.2104522024643796e+00
 -2.2294724097842509e+00 -2.2483895961339160e+00 -2.2672041084645986e+00 -2.2859162962717674e+00 -2.3045265115518041e+00
 -2.3230351087586723e+00 -2.3414424447605846e+00 -2.3597488787966716e+00 -2.3779547724336485e+00 -2.3960604895224860e+00
 -2.4140663961550741e+00 -2.4319728606208950e+00 -2.4497802533636879e+00 -2.4674889469381176e+00 -2.4850993159664441e+00
 -2.5026117370951892e+00 -2.5200265889518043e+00 -2.5373442521013416e+00 -2.5545651090031165e+00 -2.5716895439673815e+00
 -2.5887179431119911e+00 -2.6056506943190709e+00 -2.6224881871916845e+00 -2.6392308130105038e+00 -2.6558789646904750e+00
 -2.6724330367374871e+00 -2.6888934252050416e+00 -2.7052605276509185e+00 -2.7215347430938452e+00 -2.7377164719701654e+00
 -2.7538061160905056e+00 -2.7698040785964446e+00 -2.7857107639171810e+00 -2.8015265777262011e+00 -2.8172519268979470e+00
 -2.8328872194644861e+00 -2.8484328645721764e+00 -2.8638892724383376e+00 -2.8792568543079171e+00 -2.8945360224101582e+00
 -2.9097271899152704e+00 -2.9248307708910946e+00 -2.9398471802597723e+00 -2.9547768337544147e+00 -2.9696201478757707e+00
 -2.9843775398488912e+00 -2.9990494275798039e+00 -3.0136362296121750e+00 -3.0281383650839819e+00 -3.0425562536841784e+00
 -3.0568903156093628e+00 -3.0711409715204501e+00 -3.0853086424993341e+00 -3.0993937500055595e+00 -3.1133967158329887e+00
 -3.1273179620664706e+00 -3.1411579110385075e+00 -3.1549169852859245e+00 -3.1685956075065351e+00 -3.1821942005158137e+00
 -3.1957131872035602e+00 -3.2091529904905691e+00 -3.2225140332852962e+00 -3.2357967384405302e+00 -3.2490015287100564e+00
 -3.2621288267053292e+00 -3.2751790548521358e+00 -3.2881526353472688e+00 -3.3010499901151902e+00 -3.3138715407647017e+00
 -3.3266177085456134e+00 -3.3392889143054085e+00 -3.3518855784459167e+00 -3.3644081208799768e+00 -3.3768569609881092e+00
 -3.3892325175751807e+00 -3.4015352088270756e+00 -3.4137654522673597e+00 -3.4259236647139546e+00 -3.4380102622357986e+00
 -3.4500256601095196e+00 -3.4619702727761026e+00 -3.4738445137975562e+00 -3.4856487958135829e+00 -3.4973835304982424e+00
 -3.5090491285166272e+00 -3.5206459994815251e+00 -3.5321745519100891e+00 -3.5436351931805032e+00 -3.5550283294886555e+00
 -3.5663543658048025e+00 -3.5776137058302360e+00 -3.5888067519539564e+00 -3.5999339052093347e+00 -3.6109955652307852e+00
 -3.6219921302104314e+00 -3.6329239968547751e+00 -3.6437915603413629e+00 -3.6545952142754561e+00 -3.6653353506466977e+00
 -3.6760123597857817e+00 -3.6866266303211193e+00 -3.6971785491355083e+00 -3.7076685013228015e+00 -3.7180968701445738e+00
 -3.7284640369867899e+00 -3.7387703813164745e+00 -3.7490162806383789e+00 -3.7592021104516484e+00 -3.7693282442064922e+00
 -3.7793950532608505e+00 -3.7894029068370627e+00 -3.7993521719785339e+00 -3.8092432135064063e+00 -3.8190763939762267e+00
 -3.8288520736346099e+00 -3.8385706103759123e+00 -3.8482323596988990e+00 -3.8578376746634100e+00 -3.8673869058470278e+00
 -3.8768804013017490e+00 -3.8863185065111092e+00 -3.8957015643592432e+00 -3.9050299151302452e+00 -3.9143038965194585e+00
 -3.9235238436452269e+00 -3.9326900890606455e+00 -3.9418029627653115e+00 -3.9508627922170749e+00 -3.9598699023437884e+00
 -3.9688246155550599e+00 -3.9777272517540019e+00 -3.9865781283489827e+00 -3.9953775602653767e+00 -4.0041258599573162e+00
 -4.0128233374194417e+00 -4.0214703001986516e+00 -4.0300670534058538e+00 -4.0386138997277179e+00 -4.0471111394384236e+00
 -4.0555590704114115e+00 -4.0639579881311363e+00 -4.0723081857048147e+00 -4.0806099538741796e+00 -4.0888635810272262e+00
 -4.0970693532099665e+00 -4.1052275541381782e+00 -4.1133384652091580e+00 -4.1214023655134682e+00 -4.1294195318466906e+00
 -4.1373902387211761e+00 -4.1453147583777961e+00 -4.1531933607976930e+00 -4.1610263137140304e+00 -4.1688138826237449e+00
 -4.1765563307992952e+00 -4.1842539193004153e+00 -4.1919069069858619e+00 -4.1995155505251685e+00 -4.2070801044103954e+00
 -4.2146008209678785e+00 -4.2220779503699823e+00 -4.2295117406468483e+00 -4.2369024376981494e+00 -4.2442502853048358e+00
 -4.2515555251408914e+00 -4.2588183967850801e+00 -4.2660391377326965e+00 -4.2732179834073198e+00 -4.2803551671725639e+00
 -4.2874509203438258e+00 -4.2945054722000373e+00 -4.3015190499954183e+00 -4.3084918789712221e+00 -4.3154241823674928e+00
 -4.3223161814348119e+00 -4.3291680954460485e+00 -4.3359801417081121e+00 -4.3427525355737044e+00 -4.3494854904530662e+00
 -4.3561792178257317e+00 -4.3628339272522778e+00 -4.3694498263860737e+00 -4.3760271209850341e+00 -4.3825660149233698e+00
 -4.3890667102033349e+00 -4.3955294069669808e+00 -4.4019543035079085e+00 -4.4083415962830150e+00 -4.4146914799242456e+00
 -4.4210041472503470e+00 -4.4272797892786153e+00 -4.4335185952366487e+00 -4.4397207525740949e+00 -4.4458864469744066e+00
 -4.4520158623665900e+00 -4.4581091809369529e+00 -4.4641665831408606e+00 -4.4701882477144839e+00 -4.4761743516865478e+00
 -4.4821250703900866e+00 -4.4880405774741927e+00 -4.4939210449157656e+00 -4.4997666430312648e+00 -4.5055775404884608e+00
 -4.5113539043181836e+00 -4.5170958999260780e+00 -4.5228036911043459e+00 -4.5284774400435088e+00 -4.5341173073441468e+00
 -4.5397234520286576e+00 -4.5452960315530042e+00 -4.5508352018184652e+00 -4.5563411171833863e+00 -4.5618139304749308e+00
 -4.5672537930008312e+00 -4.5726608545611391e+00 -4.5780352634599755e+00 -4.5833771665172822e+00 -4.5886867090805747e+00
 -4.5939640350366870e+00 -4.5992092868235295e+00 -4.6044226054418349e+00 -4.6096041304669102e+00 -4.6147540000603886e+00
 -4.6198723509819795e+00 -4.6249593186012179e+00 -4.6300150369092181e+00 -4.6350396385304204e+00 -4.6400332547343472e+00
 -4.6449960154473491e+00 -4.6499280492643562e+00 -4.6548294834606327e+00 -4.6597004440035219e+00 -4.6645410555642028e+00
 -4.6693514415294368e+00 -4.6741317240133187e+00 -4.6788820238690301e+00 -4.6836024607005884e+00 -4.6882931528745955e+00
 -4.6929542175319945e+00 -4.6975857705998134e+00 -4.7021879268029210e+00 -4.7067607996757737e+00 -4.7113045015741708e+00
 -4.7158191436870025e+00 -4.7203048360479984e+00 -4.7247616875474847e+00 -4.7291898059441273e+00 -4.7335892978766898e+00
 -4.7379602688757778e+00 -4.7423028233755939e+00 -4.7466170647256885e+00 -4.7509030952027071e+00 -4.7551610160221438e+00
 -4.7593909273500925e+00 -4.7635929283149956e+00 -4.7677671170193960e+00 -4.7719135905516890e+00 -4.7760324449978686e+00
 -4.7801237754532844e+00 -4.7841876760343869e+00 -4.7882242398904840e+00 -4.7922335592154841e+00 -4.7962157252596551e+00
 -4.8001708283413693e+00 -4.8040989578588551e+00 -4.8080002023019519e+00 -4.8118746492638538e+00 -4.8157223854528679e+00
 -4.8195434967041582e+00 -4.8233380679915028e+00 -4.8271061834390387e+00 -4.8308479263330169e+00 -4.8345633791335505e+00
 -4.8382526234863672e+00 -4.8419157402345601e+00 -4.8455528094303357e+00 -4.8491639103467676e+00 -4.8527491214895475e+00
 -4.8563085206087333e+00 -4.8598421847105016e+00 -4.8633501900688980e+00 -4.8668326122375891e+00 -4.8702895260616117e+00
 -4.8737210056891236e+00 -4.8771271245831560e+00 -4.8805079555333606e+00 -4.8838635706677644e+00 -4.8871940414645207e+00
 -4.8904994387636558e+00 -4.8937798327788213e+00 -4.8970352931090479e+00 -4.9002658887504920e+00 -4.9034716881081888e+00
 -4.9066527590078035e+00 -4.9098091687073797e+00 -4.9129409839090918e+00 -4.9160482707709958e+00 -4.9191310949187805e+00
 -4.9221895214575158e+00 -4.9252236149834072e+00 -4.9282334395955418e+00 -4.9312190589076446e+00 -4.9341805360598245e+00
 -4.9371179337303284e+00 -4.9400313141472889e+00 -4.9429207391004795e+00 -4.9457862699530581e+00 -4.9486279676533265e+00
 -4.9514458927464755e+00 -4.9542401053863356e+00 -4.9570106653471306e+00 -4.9597576320352275e+00 -4.9624810645008841e+00
 -4.9651810214500056e+00 -4.9678575612558902e+00 -4.9705107419709824e+00 -4.9731406213386222e+00 -4.9757472568047971e+00
 -4.9783307055298947e+00 -4.9808910244003677e+00 -4.9834282700383419e+00 -4.9859424988059562e+00 -4.9884337668076393e+00
 -4.9909021298923006e+00 -4.9933476436555315e+00 -4.9957703634417943e+00 -4.9981703443466206e+00 -5.0005476412188017e+00
 -5.0029023086625886e+00 -5.0052344010398828e+00 -5.0075439724724333e+00 -5.0098310768440291e+00 -5.0120957678026974e+00
 -5.0143380987628934e+00 -5.0165581229076990e+00 -5.0187558931910168e+00 -5.0209314623397630e+00 -5.0230848828560646e+00
 -5.0252162070194517e+00 -5.0273254868890538e+00 -5.0294127743057953e+00 -5.0314781208945858e+00 -5.0335215780665221e+00
 -5.0355431970210747e+00 -5.0375430287482903e+00 -5.0395211240309807e+00 -5.0414775334469208e+00 -5.0434123073710397e+00
 -5.0453254959776217e+00 -5.0472171492424938e+00 -5.0490873169452257e+00 -5.0509360486713222e+00 -5.0527633938144181e+00
 -5.0545694015784726e+00 -5.0563541209799663e+00 -5.0581176008500925e+00 -5.0598598898369529e+00 -5.0615810364077563e+00
 -5.0632810888510056e+00 -5.0649600952787006e+00 -5.0666181036285272e+00 -5.0682551616660545e+00 -5.0698713169869274e+00
 -5.0714666170190661e+00 -5.0730411090248539e+00 -5.0745948401033383e+00 -5.0761278571924207e+00 -5.0776402070710560e+00
 -5.0791319363614429e+00 -5.0806030915312199e+00 -5.0820537188956623e+00 -5.0834838646198746e+00 -5.0848935747209847e+00
 -5.0862828950703411e+00 -5.0876518713957051e+00 -5.0890005492834467e+00 -5.0903289741807392e+00 -5.0916371913977549e+00
 -5.0929252461098580e+00 -5.0941931833598000e+00 -5.0954410480599144e+00 -5.0966688849943127e+00 -5.0978767388210766e+00
 -5.0990646540744535e+00 -5.1002326751670557e+00 -5.1013808463920460e+00 -5.1025092119253408e+00 -5.1036178158278007e+00
 -5.1047067020474266e+00 -5.1057759144215531e+00 -5.1068254966790452e+00 -5.1078554924424910e+00 -5.1088659452303977e+00
 -5.1098568984593848e+00 -5.1108283954463820e+00 -5.1117804794108199e+00 -5.1127131934768277e+00 -5.1136265806754269e+00
 -5.1145206839467248e+00 -5.1153955461421114e+00 -5.1162512100264523e+00 -5.1170877182802856e+00 -5.1179051135020135e+00
 -5.1187034382100993e+00 -5.1194827348452634e+00 -5.1202430457726722e+00 -5.1209844132841393e+00 -5.1217068796003185e+00
 -5.1224104868728961e+00 -5.1230952771867866e+00 -5.1237612925623308e+00 -5.1244085749574833e+00 -5.1250371662700163e+00
 -5.1256471083397068e+00 -5.1262384429505339e+00 -5.1268112118328766e+00 -5.1273654566657019e+00 -5.1279012190787654e+00
 -5.1284185406548044e+00 -5.1289174629317307e+00 -5.1293980274048270e+00 -5.1298602755289417e+00 -5.1303042487206838e+00
 -5.1307299883606161e+00 -5.1311375357954496e+00 -5.1315269323402433e+00 -5.1318982192805906e+00 -5.1322514378748219e+00
 -5.1325866293561946e+00 -5.1329038349350888e+00 -5.1332030958012025e+00 -5.1334844531257460e+00 -5.1337479480636370e+00
 -5.1339936217556961e+00 -5.1342215153308386e+00 -5.1344316699082722e+00 -5.1346241265996904e+00 -5.1347989265114666e+00
 -5.1349561107468507e+00 -5.1350957204081631e+00 -5.1352177965989867e+00 -5.1353223804263664e+00 -5.1354095130030011e+00
 -5.1354792354494370e+00 -5.1355315888962654e+00 -5.1355666144863150e+00 -5.1355843533768493e+00 -5.1355848467417582e+00
 -5.1355681357737542e+00 -5.1355342616865682e+00 -5.1354832657171405e+00 -5.1354151891278210e+00 -5.1353300732085589e+00
 -5.1352279592791010e+00 -5.1351088886911844e+00 -5.1349729028307305e+00 -5.1348200431200421e+00 -5.1346503510199977e+00
 -5.1344638680322428e+00 -5.1342606357013905e+00 -5.1340406956172115e+00 -5.1338040894168291e+00 -5.1335508587869167e+00
 -5.1332810454658899e+00 -5.1329946912461031e+00 -5.1326918379760436e+00 -5.1323725275625245e+00 -5.1320368019728813e+00
 -5.1316847032371680e+00 -5.1313162734503486e+00 -5.1309315547744934e+00 -5.1305305894409727e+00 -5.1301134197526546e+00
 -5.1296800880860962e+00 -5.1292306368937393e+00 -5.1287651087061059e+00 -5.1282835461339937e+00 -5.1277859918706667e+00
 -5.1272724886940546e+00 -5.1267430794689473e+00 -5.1261978071491834e+00 -5.1256367147798549e+00 -5.1250598454994920e+00
 -5.1244672425422655e+00 -5.1238589492401765e+00 -5.1232350090252536e+00 -5.1225954654317469e+00 -5.1219403620983233e+00
 -5.1212697427702594e+00 -5.1205836513016392e+00 -5.1198821316575449e+00 -5.1191652279162563e+00 -5.1184329842714416e+00
 -5.1176854450343541e+00 -5.1169226546360260e+00 -5.1161446576294622e+00 -5.1153514986918402e+00 -5.1145432226266960e+00
 -5.1137198743661267e+00 -5.1128814989729827e+00 -5.1120281416430595e+00 -5.1111598477072970e+00 -5.1102766626339697e+00
 -5.1093786320308876e+00 -5.1084658016475828e+00 -5.1075382173775115e+00 -5.1065959252602440e+00 -5.1056389714836623e+00
 -5.1046674023861520e+00 -5.1036812644588014e+00 -5.1026806043475901e+00 -5.1016654688555896e+00 -5.1006359049451548e+00
 -5.0995919597401178e+00 -5.0985336805279875e+00 -5.0974611147621376e+00 -5.0963743100640064e+00 -5.0952733142252900e+00
 -5.0941581752101364e+00 -5.0930289411572511e+00 -5.0918856603796989e+00 -5.0907283813588409e+00 -5.0895571527359733e+00
 -5.0883720233038723e+00 -5.0871730419983381e+00 -5.0859602578897434e+00 -5.0847337201745786e+00 -5.0834934781669947e+00
 -5.0822395812903549e+00 -5.0809720790687765e+00 -5.0796910211186779e+00 -5.0783964571403235e+00 -5.0770884369093707e+00
 -5.0757670102684180e+00 -5.0744322271185451e+00 -5.0730841374108655e+00 -5.0717227911380673e+00 -5.0703482383259617e+00
 -5.0689605290250279e+00 -5.0675597133019599e+00 -5.0661458412312124e+00 -5.0647189628865448e+00 -5.0632791283325709e+00
 -5.0618263876163008e+00 -5.0603607907586881e+00 -5.0588823877461788e+00 -5.0573912285222518e+00 -5.0558873629789689e+00
 -5.0543708409485202e+00 -5.0528417121947697e+00 -5.0513000264047987e+00 -5.0497458331804559e+00 -5.0481791820299016e+00
 -5.0466001223591510e+00 -5.0450087034636253e+00 -5.0434049745196941e+00 -5.0417889845762200e+00 -5.0401607825461099e+00
 -5.0385204171978550e+00 -5.0368679371470808e+00 -5.0352033908480909e+00 -5.0335268265854136e+00 -5.0318382924653484e+00
 -5.0301378364075102e+00 -5.0284255061363776e+00 -5.0267013491728374e+00 -5.0249654128257299e+00 -5.0232177441833956e+00
 -5.0214583901052228e+00 -5.0196873972131906e+00 -5.0179048118834162e+00 -5.0161106802377011e+00 -5.0143050481350757e+00
 -5.0124879611633473e+00 -5.0106594646306446e+00 -5.0088196035569652e+00 -5.0069684226657163e+00 -5.0051059663752699e+00
 -5.0032322787904988e+00 -5.0013474036943304e+00 -4.9994513845392881e+00 -4.9975442644390382e+00 -4.9956260861599358e+00
 -4.9936968921125722e+00 -4.9917567243433201e+00 -4.9898056245258768e+00 -4.9878436339528145e+00 -4.9858707935271234e+00
 -4.9838871437537575e+00 -4.9818927247311837e+00 -4.9798875761429224e+00 -4.9778717372491004e+00 -4.9758452468779879e+00
 -4.9738081434175534e+00 -4.9717604648070051e+00 -4.9697022485283346e+00 -4.9676335315978690e+00 -4.9655543505578112e+00
 -4.9634647414677886e+00 -4.9613647398963989e+00 -4.9592543809127552e+00 -4.9571336990780317e+00 -4.9550027284370115e+00
 -4.9528615025096308e+00 -4.9507100542825251e+00 -4.9485484162005751e+00 -4.9463766201584516e+00 -4.9441946974921667e+00
 -4.9420026789706109e+00 -4.9398005947871066e+00 -4.9375884745509513e+00 -4.9353663472789622e+00 -4.9331342413870232e+00
 -4.9308921846816327e+00 -4.9286402043514457e+00 -4.9263783269588242e+00 -4.9241065784313784e+00 -4.9218249840535169e+00
 -4.9195335684579904e+00 -4.9172323556174362e+00 -4.9149213688359286e+00 -4.9126006307405197e+00 -4.9102701632727888e+00
 -4.9079299876803884e+00 -4.9055801245085853e+00 -4.9032205935918158e+00 -4.9008514140452206e+00 -4.8984726042561988e+00
 -4.8960841818759517e+00 -4.8936861638110258e+00 -4.8912785662148650e+00 -4.8888614044793481e+00 -4.8864346932263434e+00
 -4.8839984462992465e+00 -4.8815526767545343e+00 -4.8790973968533029e+00 -4.8766326180528212e+00 -4.8741583509980710e+00
 -4.8716746055132951e+00 -4.8691813905935435e+00 -4.8666787143962180e+00 -4.8641665842326223e+00 -4.8616450065595007e+00
 -4.8591139869705895e+00 -4.8565735301881636e+00 -4.8540236400545771e+00 -4.8514643195238145e+00 -4.8488955706530339e+00
 -4.8463173945941129e+00 -4.8437297915851962e+00 -4.8411327609422408e+00 -4.8385263010505604e+00 -4.8359104093563738e+00
 -4.8332850823583486e+00 -4.8306503155991489e+00 -4.8280061036569792e+00 -4.8253524401371344e+00 -4.8226893176635404e+00
 -4.8200167278703017e+00 -4.8173346613932519e+00 -4.8146431078614924e+00 -4.8119420558889425e+00 -4.8092314930658864e+00
 -4.8065114059505154e+00 -4.8037817800604765e+00 -4.8010425998644184e+00 -4.7982938487735352e+00 -4.7955355091331135e+00
 -4.7927675622140820e+00 -4.7899899882045496e+00 -4.7872027662013572e+00 -4.7844058742016244e+00 -4.7815992890942907e+00
 -4.7787829866516640e+00 -4.7759569415209668e+00 -4.7731211272158838e+00 -4.7702755161081019e+00 -4.7674200794188639e+00
 -4.7645547872105070e+00 -4.7616796083780155e+00 -4.7587945106405618e+00 -4.7558994605330529e+00 -4.7529944233976797e+00
 -4.7500793633754599e+00 -4.7471542433977847e+00 -4.7442190251779630e+00 -4.7412736692027719e+00 -4.7383181347239978e+00
 -4.7353523797499850e+00 -4.7323763610371818e+00 -4.7293900340816828e+00 -4.7263933531107805e+00 -4.7233862710745065e+00
 -4.7203687396371805e+00 -4.7173407091689530e+00 -4.7143021287373559e+00 -4.7112529460988428e+00 -4.7081931076903398e+00
 -4.7051225586207899e+00 -4.7020412426626956e+00 -4.6989491022436702e+00 -4.6958460784379810e+00 -4.6927321109580946e+00
 -4.6896071381462239e+00 -4.6864710969658745e+00 -4.6833239229933881e+00 -4.6801655504094928e+00 -4.6769959119908444e+00
 -4.6738149391015753e+00 -4.6706225616848398e+00 -4.6674187082543579e+00 -4.6642033058859660e+00 -4.6609762802091570e+00
 -4.6577375553986320e+00 -4.6544870541658412e+00 -4.6512246977505312e+00 -4.6479504059122947e+00 -4.6446640969221118e+00
 -4.6413656875538960e+00 -4.6380550930762769e+00 -4.6347322272504110e+00 -4.6313970023431299e+00 -4.6280493291461182e+00
 -4.6246891169953308e+00 -4.6213162737904048e+00 -4.6179307060140751e+00 -4.6145323187515874e+00 -4.6111210157101112e+00
 -4.6076966992381587e+00 -4.6042592703449916e+00 -4.6008086287200411e+00 -4.5973446727523193e+00 -4.5938672995498342e+00
 -4.5903764049590032e+00 -4.5868718835840658e+00 -4.5833536288065009e+00 -4.5798215328044378e+00 -4.5762754865720741e+00
 -4.5727153799390834e+00 -4.5691411015900361e+00 -4.5655525390838090e+00 -4.5619495788730022e+00 -4.5583321063233502e+00
 -4.5547000057331388e+00 -4.5510531603526179e+00 -4.5473914524034136e+00 -4.5437147630979471e+00 -4.5400229726588455e+00
 -4.5363159603383538e+00 -4.5325936044377535e+00 -4.5288557823267741e+00 -4.5251023704630082e+00 -4.5213332444113234e+00
 -4.5175482788632797e+00 -4.5137473476565413e+00 -4.5099303237942907e+00 -4.5060970794646424e+00 -4.5022474860600603e+00
 -4.4983814141967660e+00 -4.4944987337341598e+00 -4.4905993137942266e+00 -4.4866830227809587e+00 -4.4827497283997637e+00
 -4.4787992976768782e+00 -4.4748315969787882e+00 -4.4708464920316366e+00 -4.4668438479406394e+00 -4.4628235292095004e+00
 -4.4587853997598268e+00 -4.4547293229505378e+00 -4.4506551615972851e+00 -4.4465627779918631e+00 -4.4424520339216231e+00
 -4.4383227906888898e+00 -4.4341749091303715e+00 -4.4300082496365789e+00 -4.4258226721712344e+00 -4.4216180362906901e+00
 -4.4173942011633391e+00 -4.4131510255890314e+00 -4.4088883680184852e+00 -4.4046060865727057e+00 -4.4003040390623944e+00
 -4.3959820830073664e+00 -4.3916400756559613e+00 -4.3872778740044609e+00 -4.3828953348165012e+00 -4.3784923146424868e+00
 -4.3740686698390032e+00 -4.3696242565882351e+00 -4.3651589309173762e+00 -4.3606725487180453e+00 -4.3561649657657000e+00
 -4.3516360377390519e+00 -4.3470856202394774e+00 -4.3425135688104364e+00 -4.3379197389568818e+00 -4.3333039861646760e+00
 -4.3286661659200050e+00 -4.3240061337287923e+00 -4.3193237451361117e+00 -4.3146188557456044e+00 -4.3098913212388874e+00
 -4.3051409973949735e+00 -4.3003677401096843e+00 -4.2955714054150596e+00 -4.2907518494987773e+00 -4.2859089287235639e+00
 -4.2810424996466105e+00 -4.2761524190389846e+00 -4.2712385439050475e+00 -4.2663007315018637e+00 -4.2613388393586193e+00
 -4.2563527252960354e+00 -4.2513422474457796e+00 -4.2463072642698805e+00 -4.2412476345801462e+00 -4.2361632175575723e+00
 -4.2310538727717599e+00 -4.2259194602003278e+00 -4.2207598402483271e+00 -4.2155748737676557e+00 -4.2103644220764735e+00
 -4.2051283469786114e+00 -4.1998665107829920e+00 -4.1945787763230395e+00 -4.1892650069760942e+00 -4.1839250666828285e+00
 -4.1785588199666588e+00 -4.1731661319531606e+00 -4.1677468683894823e+00 -4.1623008956637593e+00 -4.1568280808245275e+00
 -4.1513282916001391e+00 -4.1458013964181735e+00 -4.1402472644248567e+00 -4.1346657655044687e+00 -4.1290567702987619e+00
 -4.1234201502263756e+00 -4.1177557775022455e+00 -4.1120635251570237e+00 -4.1063432670564879e+00 -4.1005948779209582e+00
 -4.0948182333447107e+00 -4.0890132098153913e+00 -4.0831796847334294e+00 -4.0773175364314511e+00 -4.0714266441936955e+00
 -4.0655068882754275e+00 -4.0595581499223536e+00 -4.0535803113900313e+00 -4.0475732559632878e+00 -4.0415368679756334e+00
 -4.0354710328286725e+00 -4.0293756370115226e+00 -4.0232505681202220e+00 -4.0170957148771498e+00 -4.0109109671504379e+00
 -4.0046962159733832e+00 -3.9984513535638642e+00 -3.9921762733437531e+00 -3.9858708699583314e+00 -3.9795350392957038e+00
 -3.9731686785062110e+00 -3.9667716860218447e+00 -3.9603439615756617e+00 -3.9538854062211972e+00 -3.9473959223518804e+00
 -3.9408754137204474e+00 -3.9343237854583544e+00 -3.9277409440951936e+00 -3.9211267975781063e+00 -3.9144812552911974e+00
 -3.9078042280749483e+00 -3.9010956282456331e+00 -3.8943553696147295e+00 -3.8875833675083373e+00 -3.8807795387865869e+00
 -3.8739438018630592e+00 -3.8670760767241941e+00 -3.8601762849487096e+00 -3.8532443497270119e+00 -3.8462801958806119e+00
 -3.8392837498815382e+00 -3.8322549398717509e+00 -3.8251936956825565e+00 -3.8180999488540222e+00 -3.8109736326543882e+00
 -3.8038146820994831e+00 -3.7966230339721392e+00 -3.7893986268416029e+00 -3.7821414010829519e+00 -3.7748512988965093e+00
 -3.7675282643272556e+00 -3.7601722432842437e+00 -3.7527831835600134e+00 -3.7453610348500055e+00 -3.7379057487719742e+00
 -3.7304172788854046e+00 -3.7228955807109227e+00 -3.7153406117497121e+00 -3.7077523315029275e+00 -3.7001307014911080e+00
 -3.6924756852735925e+00 -3.6847872484679325e+00 -3.6770653587693061e+00 -3.6693099859699334e+00 -3.6615211019784901e+00
 -3.6536986808395202e+00 -3.6458426987528512e+00 -3.6379531340930091e+00 -3.6300299674286300e+00 -3.6220731815418761e+00
 -3.6140827614478499e+00 -3.6060586944140063e+00 -3.5980009699795685e+00 -3.5899095799749414e+00 -3.5817845185411263e+00
 -3.5736257821491337e+00
  1.0000000000000000e+00  9.9999990910689995e-01  1.0000000037112238e+00  1.0000002936828685e+00  1.0000008046834055e+00
  1.0000015855660727e+00  1.0000027093678092e+00  1.0000042641516329e+00  1.0000063414137026e+00  1.0000090255010428e+00
  1.0000123904761109e+00  1.0000165044282008e+00  1.0000214348189274e+00  1.0000272528715144e+00  1.0000340339637457e+00
  1.0000418554978483e+00  1.0000507946028958e+00  1.0000609265580658e+00  1.0000723250459103e+00  1.0000850631265297e+00
  1.0000992142030924e+00  1.0001148525171086e+00  1.0001320528988775e+00  1.0001508903390552e+00  1.0001714395954795e+00
  1.0001937750703380e+00  1.0002179709576795e+00  1.0002441014284889e+00  1.0002722407827322e+00  1.0003024634633035e+00
  1.0003348439827873e+00  1.0003694568444295e+00  1.0004063764878979e+00  1.0004456772979760e+00  1.0004874336380485e+00
  1.0005317198832910e+00  1.0005786104376935e+00  1.0006281797254837e+00  1.0006805021764009e+00  1.0007356522121831e+00
  1.0007937042423429e+00  1.0008547326692401e+00  1.0009188118944408e+00  1.0009860163239446e+00  1.0010564203686640e+00
  1.0011300984419069e+00  1.0012071249566596e+00  1.0012875743237240e+00  1.0013715209520144e+00  1.0014590392497111e+00
  1.0015502036253987e+00  1.0016450884886519e+00  1.0017437682497414e+00  1.0018463173191277e+00  1.0019528101069959e+00
  1.0020633210231114e+00  1.0021779244769931e+00  1.0022966948781329e+00  1.0024197066361749e+00  1.0025470341609315e+00
  1.0026787518622977e+00  1.0028149341501584e+00  1.0029556554343240e+00  1.0031009901245398e+00  1.0032510126305252e+00
  1.0034057973620123e+00  1.0035654187287655e+00  1.0037299511405740e+00  1.0038994690072349e+00  1.0040740467385401e+00
  1.0042537587442693e+00  1.0044386794341917e+00  1.0046288832180701e+00  1.0048244445056638e+00  1.0050254377067334e+00
  1.0052319372310501e+00  1.0054440174884005e+00  1.0056617528885878e+00  1.0058852178414164e+00  1.0061144867566680e+00
  1.0063496340440823e+00  1.0065907341133606e+00  1.0068378613742122e+00  1.0070910902364094e+00  1.0073504951098322e+00
  1.0076161504044301e+00  1.0078881305301042e+00  1.0081665098965769e+00  1.0084513629133176e+00  1.0087427639896922e+00
  1.0090407875352547e+00  1.0093455079600422e+00  1.0096569996746516e+00  1.0099753370897613e+00  1.0103005946154369e+00
  1.0106328466604859e+00  1.0109721676325807e+00  1.0113186319395964e+00  1.0116723139912402e+00  1.0120332882003498e+00
  1.0124016289818114e+00  1.0127774107490999e+00  1.0131607079105085e+00  1.0135515948669513e+00  1.0139501460163240e+00
  1.0143564357620016e+00  1.0147705385214123e+00  1.0151925287282653e+00  1.0156224808186600e+00  1.0160604692108517e+00
  1.0165065682864962e+00  1.0169608523942226e+00  1.0174233958885657e+00  1.0178942731773566e+00  1.0183735587594960e+00
  1.0188613271935001e+00  1.0193576529968227e+00  1.0198626105361486e+00  1.0203762739634936e+00  1.0208987173430388e+00
  1.0214300148983815e+00  1.0219702412620009e+00  1.0225194715400285e+00  1.0230777809081675e+00  1.0236452440229327e+00
  1.0242219344760375e+00  1.0248079248983060e+00  1.0254032880923778e+00  1.0260080984115156e+00  1.0266224328585392e+00
  1.0272463701707286e+00  1.0278799878906923e+00  1.0285233591745682e+00  1.0291765509329227e+00  1.0298396275208415e+00
  1.0305126579314843e+00  1.0311957230540165e+00  1.0318889175580224e+00  1.0325923381372260e+00  1.0333060663800764e+00
  1.0340301528956939e+00  1.0347646203370910e+00  1.0355094963561002e+00  1.0362648537183397e+00  1.0370308422756527e+00
  1.0378076623422565e+00  1.0385954794745944e+00  1.0393943316091570e+00  1.0402040749738091e+00  1.0410244914472815e+00
  1.0418554978484011e+00  1.0426973570983227e+00  1.0435507330456308e+00  1.0444163484292384e+00  1.0452944865152616e+00
  1.0461845292573670e+00  1.0470850452543861e+00  1.0479947485407679e+00  1.0489136656912128e+00  1.0498440660266750e+00
  1.0507896870201594e+00  1.0517532549023134e+00  1.0527337829297336e+00  1.0537249977291814e+00  1.0547184628128563e+00
  1.0557096676362216e+00  1.0567041711492873e+00  1.0577191968868100e+00  1.0587736817782392e+00  1.0598737768197866e+00
  1.0609994103318119e+00  1.0621068466449319e+00  1.0631565802057346e+00  1.0641472902400182e+00  1.0651429047026921e+00
  1.0662500762509404e+00  1.0675460702406483e+00  1.0690001844576793e+00  1.0704279131813335e+00  1.0715814549250877e+00
  1.0723263002820371e+00  1.0728195072876967e+00  1.0735586991376600e+00  1.0751028901550534e+00  1.0776640408584792e+00
  1.0807213401769808e+00  1.0829935112227953e+00  1.0829781963978145e+00  9.1653491813854515e-01  9.1285922136042674e-01
  9.0885936184054039e-01  9.0453660215688669e-01  8.9989280881918432e-01  8.9493043323771748e-01  8.8965249269218327e-01
  8.8406255130053857e-01  8.7816470098784805e-01  8.7196354245513064e-01  8.6546416614820765e-01  8.5867213322654901e-01
  8.5159345653212182e-01  8.4423458155823650e-01  8.3660236741839478e-01  8.2870406781513684e-01  8.2054731200888809e-01
  8.1214008578680752e-01  8.0349071243163384e-01  7.9460783369053356e-01  7.8550039074394784e-01  7.7617760517444001e-01
  7.6664895993554283e-01  7.5692418032060549e-01  7.4701321493164163e-01  7.3692621664817559e-01  7.2667352359609050e-01
  7.1626564011647531e-01  7.0571321773447193e-01  6.9502703612812300e-01  6.8421798409721835e-01  6.7329704053214301e-01
  6.6227525538272447e-01  6.5116373062707944e-01  6.3997360124046154e-01  6.2871601616410855e-01  6.1740211927408950e-01
  6.0604303035015250e-01  5.9464982604457117e-01  5.8323352085099245e-01  5.7180504807328414e-01  5.6037524079438139e-01
  5.4895481284513514e-01  5.3755433977315814e-01  5.2618423981167295e-01  5.1485475484835941e-01  5.0357593139420098e-01
  4.9235760155233343e-01  4.8120936398689096e-01  4.7014056489185391e-01  4.5916027895989603e-01  4.4827729035123182e-01
  4.3750007366246385e-01  4.2683677489542970e-01  4.1629519242604984e-01  4.0588275797317430e-01  3.9560651756743037e-01
  3.8547311252006977e-01  3.7548876039706813e-01  3.6565923760058405e-01  3.5598987432036161e-01  3.4648556269117137e-01
  3.3715076696534485e-01  3.2798953369605072e-01  3.1900550192057131e-01  3.1020191334357849e-01  3.0158162252041043e-01
  2.9314710704034769e-01  2.8490047770988935e-01  2.7684348873602960e-01  2.6897754790953393e-01  2.6130372678821540e-01
  2.5382277088021082e-01  2.4653510982725735e-01  2.3944086758796848e-01  2.3253987262111056e-01  2.2583166806887894e-01
  2.1931552194017431e-01  2.1299043729387909e-01  2.0685516242213361e-01  2.0090820103361243e-01  1.9514782243680065e-01
  1.8957207172327020e-01  1.8417877995095627e-01  1.7896557432743326e-01  1.7392988839319148e-01  1.6906897220491315e-01
  1.6437990251874895e-01  1.5985959297359403e-01  1.5550480427436447e-01  1.5131215437527373e-01  1.4727812866310852e-01
  1.4339909014050556e-01  1.3967128960922753e-01  1.3609087585343960e-01  1.3265390582298564e-01  1.2935635481666435e-01
  1.2619412666550600e-01  1.2316306391604814e-01  1.2025895801361236e-01  1.1747755948558042e-01  1.1481458812467055e-01
  1.1226574317221361e-01  1.0982671350142975e-01  1.0749318780070433e-01  1.0526086475686441e-01  1.0312546323845501e-01
  1.0108273247901539e-01  9.9128462260355210e-02  9.7258493095831289e-02  9.5468726413623362e-02  9.3755134740010626e-02
  9.2113771882648077e-02  9.0540783113842505e-02  8.9032415353829442e-02  8.7585027354048717e-02  8.6195099878877829e-02
  8.4859245261514990e-02  8.3574211729720363e-02  8.2336881770277079e-02  8.1144269509622696e-02  7.9993518087977264e-02
  7.8881897033471260e-02  7.7806799636273502e-02  7.6765740322719253e-02  7.5756352029438062e-02  7.4776383577481870e-02
  7.3823697046452891e-02  7.2896265148631664e-02  7.1992168603104922e-02  7.1109593509893709e-02  7.0246828724081195e-02
  6.9402263229940822e-02  6.8574383515064147e-02  6.7761770944488917e-02  6.6963099134826939e-02  6.6177131328392175e-02
  6.5402717767328630e-02  6.4638793067738384e-02  6.3884373593809496e-02  6.3138554831944110e-02  6.2400508764886266e-02
  6.1669481245850019e-02  6.0944789372647357e-02  6.0225818861816147e-02  5.9512021422748168e-02  5.8802912131817056e-02
  5.8098066806506310e-02  5.7397119379537218e-02  5.6699759272996891e-02  5.6005728772466179e-02  5.5314820401147720e-02
  5.4626874293993856e-02  5.3941775571834646e-02  5.3259451715505814e-02  5.2579869939976744e-02  5.1903034568478452e-02
  5.1228984406631581e-02  5.0557790116574346e-02  4.9889551591090528e-02  4.9224395327737432e-02  4.8562471802973926e-02
  4.7903952846288338e-02  4.7249029014326462e-02  4.6597906965019559e-02  4.5950806831712300e-02  4.5307959597290767e-02
  4.4669604468310413e-02  4.4035986249124068e-02  4.3407352716009845e-02  4.2783951991299231e-02  4.2166029917504941e-02
  4.1553827431448982e-02  4.0947577938390579e-02  4.0347504686382089e-02  3.9753818266908776e-02  3.9166715263227063e-02
  3.8586378295416481e-02  3.8012976314453349e-02  3.7446664898293201e-02  3.6887586547953245e-02  3.6335870983594809e-02
  3.5791635440605811e-02  3.5254984965683210e-02  3.4726012712915449e-02  3.4204800239864927e-02  3.3691417803650425e-02
  3.3185924657029603e-02  3.2688369344481397e-02  3.2198789998288554e-02  3.1717214634619989e-02  3.1243661449613311e-02
  3.0778139115457265e-02  3.0320647076474166e-02  2.9871175845202359e-02  2.9429707298478682e-02  2.8996214973520926e-02
  2.8570664364010269e-02  2.8153013216173743e-02  2.7743211824866686e-02  2.7341203329655207e-02  2.6946924010898612e-02
  2.6560303585831904e-02  2.6181265504648180e-02  2.5809727246581128e-02  2.5445600615987475e-02  2.5088792038429428e-02
  2.4739202856757143e-02  2.4396729627191152e-02  2.4061264415404866e-02  2.3732695092606972e-02  2.3410905631623936e-02
  2.3095776402982431e-02  2.2787184470991793e-02  2.2485003889826487e-02  2.2189105999608542e-02  2.1899359722490040e-02
  2.1615631858735520e-02  2.1337787382804480e-02  2.1065689739433808e-02  2.0799201139720228e-02  2.0538182857202786e-02
  2.0282495523945267e-02  2.0031999426618676e-02  1.9786554802583678e-02  1.9546022135973066e-02  1.9310262453774193e-02
  1.9079137621911459e-02  1.8852510641328729e-02  1.8630245944071810e-02  1.8412209689370910e-02  1.8198270059723066e-02
  1.7988297556959212e-02  1.7782165286187274e-02  1.7579749119718813e-02  1.7380927705032124e-02  1.7185582442728102e-02
  1.6993597464194817e-02  1.6804859609272020e-02  1.6619258403915711e-02  1.6436686037862663e-02  1.6257037342294989e-02
  1.6080209767504659e-02  1.5906103360558057e-02  1.5734620742960528e-02  1.5565667088320901e-02  1.5399150100016058e-02
  1.5234979988855457e-02  1.5073069450745682e-02  1.4913333644354985e-02  1.4755690168777834e-02  1.4600059041199447e-02
  1.4446362674560335e-02  1.4294525855220860e-02  1.4144475720625754e-02  1.3996141736968681e-02  1.3849455676856776e-02
  1.3704351596975178e-02  1.3560765815751583e-02  1.3418636891020788e-02  1.3277905597689221e-02  1.3138514905399499e-02
  1.3000409956194964e-02  1.2863538042184222e-02  1.2727848583205692e-02  1.2593293104492148e-02  1.2459825214335259e-02
  1.2327400581750133e-02  1.2195976914139865e-02  1.2065513934960064e-02  1.1935973361383422e-02  1.1807318881964228e-02
  1.1679516134302934e-02  1.1552532682710680e-02  1.1426337995873856e-02  1.1300903424518623e-02  1.1176202179075473e-02
  1.1052209307343767e-02  1.0928901672156269e-02  1.0806257929043708e-02  1.0684258503899298e-02  1.0562885570643296e-02
  1.0442123028887544e-02  1.0321956481600007e-02  1.0202373212769315e-02  1.0083362165069309e-02  9.9649139175235872e-03
  9.8470206631700394e-03  9.7296761867253952e-03  9.6128758422497698e-03  9.4966165308103846e-03  9.3808966771954071e-03
  9.2657161963685709e-03  9.1510764456853542e-03  9.0369801741559432e-03  8.9234314716740894e-03  8.8104357182459871e-03
  8.6979995332191317e-03  8.5861307245111915e-03  8.4748382378388720e-03  8.3641321059467789e-03  8.2540233978362961e-03
  8.1445241679944380e-03  8.0356474056227263e-03  7.9274069838660526e-03  7.8198176090415444e-03  7.7128947698674333e-03
  7.6066546866919230e-03  7.5011142607220496e-03  7.3962910232525571e-03  7.2922030848947567e-03  7.1888690848053985e-03
  7.0863081399155318e-03  6.9845397941593786e-03  6.8835839677031975e-03  6.7834609061741494e-03  6.6841911298891618e-03
  6.5857953830838027e-03  6.4882945831411390e-03  6.3917097698206098e-03  6.2960620544868879e-03  6.2013725693387499e-03
  6.1076624166379392e-03  6.0149526179380363e-03  5.9232640633133261e-03  5.8326174605876566e-03  5.7430332845633154e-03
  5.6545317262498927e-03  5.5671326420931415e-03  5.4808555032038559e-03  5.3957193445867300e-03  5.3117427143692239e-03
  5.2289436230304343e-03  5.1473394926299602e-03  5.0669471060367658e-03  4.9877825561580515e-03  4.9098611951681201e-03
  4.8331975837372409e-03  4.7578054402605150e-03  4.6836975900867491e-03  4.6108859147473147e-03  4.5393813011850165e-03
  4.4691935909829620e-03  4.4003315295934259e-03  4.3328027155667137e-03  4.2666135497800347e-03  4.2017691846663640e-03
  4.1382734734433093e-03  4.0761289193434139e-03  4.0153366274806781e-03  3.9558962878357236e-03  3.8978062043742122e-03
  3.8410633344707198e-03  3.7856633284725797e-03  3.7316005692637254e-03  3.6788682118285357e-03  3.6274582228156757e-03
  3.5773614201019435e-03  3.5285675123561118e-03  3.4810651386027714e-03  3.4348419077861749e-03  3.3898844383340814e-03
  3.3461783977215983e-03  3.3037085420350261e-03  3.2624587555357002e-03  3.2224120902238375e-03  3.1835508054023766e-03
  3.1458564072408234e-03  3.1093096883390943e-03  3.0738907672913582e-03  3.0395791282498835e-03  3.0063536604888765e-03
  2.9741926979683312e-03  2.9430740588978661e-03  2.9129750853005738e-03  2.8838726825768596e-03  2.8557433590682899e-03
  2.8285632656214299e-03  2.8023082351516931e-03  2.7769538222071804e-03  2.7524753425325252e-03  2.7288479126327380e-03
  2.7060464893370489e-03  2.6840459093627495e-03  2.6628209288790403e-03  2.6423462630708701e-03  2.6225966257027826e-03
  2.6035467686827581e-03  2.5851715216260581e-03  2.5674458314190684e-03  2.5503448017831420e-03  2.5338437328384436e-03
  2.5179181606677934e-03  2.5025438968805094e-03  2.4876970681762516e-03  2.4733541559088649e-03  2.4594920356502247e-03
  2.4460880167540781e-03  2.4331198819198866e-03  2.4205659267566748e-03  2.4084049993468668e-03  2.3966165398101365e-03
  2.3851806198672450e-03  2.3740779824038892e-03  2.3632900810345425e-03  2.3527991196662982e-03  2.3425880920622151e-03
  2.3326408198400452e-03  2.3229419702479664e-03  2.3134770419087482e-03  2.3042323428642919e-03  2.2951949684982707e-03
  2.2863527794587711e-03  2.2776943795809320e-03  2.2692090938095854e-03  2.2608869461218980e-03  2.2527186374500102e-03
  2.2446955236036792e-03  2.2368095931929151e-03  2.2290534455506258e-03  2.2214202686552547e-03  2.2139038170534233e-03
  2.2064983897825689e-03  2.1991988082935882e-03  2.1920003943734752e-03  2.1848989480679638e-03  2.1778907256041666e-03
  2.1709724173132163e-03  2.1641411255529058e-03  2.1573943426303295e-03  2.1507299287245219e-03  2.1441460898091007e-03
  2.1376413555749059e-03  2.1312145573526386e-03  2.1248648060355054e-03  2.1185914700018555e-03  2.1123941530378229e-03
  2.1062726722599658e-03  2.1002270360379080e-03  2.0942574219169792e-03  2.0883641545408559e-03  2.0825476835742000e-03
  2.0768085616253021e-03  2.0711474221687194e-03  2.0655649574679177e-03  2.0600618964979121e-03  2.0546389828679061e-03
  2.0492969527439336e-03  2.0440365127714979e-03  2.0388583179982134e-03  2.0337629497964465e-03  2.0287508937859534e-03
  2.0238225177565245e-03  2.0189780495906214e-03  2.0142175551860196e-03  2.0095409163784477e-03  2.0049478088642290e-03
  2.0004376801229210e-03  1.9960097273399565e-03  1.9916628753292834e-03  1.9873957544560067e-03  1.9832066785590275e-03
  1.9790936228736835e-03  1.9750542019543902e-03  1.9710856475974310e-03  1.9671847876362916e-03  1.9633480371101498e-03
  1.9595714103762978e-03  1.9558505386355748e-03  1.9521806875568654e-03  1.9485567749016051e-03  1.9449733881482807e-03
  1.9414248021169327e-03  1.9379049965936584e-03  1.9344076739551126e-03  1.9309262767930112e-03  1.9274540055386324e-03
  1.9239838360873194e-03  1.9205085374229824e-03  1.9170206892426009e-03  1.9135126995807258e-03  1.9099768224339815e-03
  1.9064051753855682e-03  1.9027897572297639e-03  1.8991224655964271e-03  1.8953951145754984e-03  1.8915994523415029e-03
  1.8877271787780525e-03  1.8837699631023479e-03  1.8797194614896806e-03  1.8755673346979361e-03  1.8713052656920946e-03
  1.8669249772687341e-03  1.8624182496805328e-03  1.8577769382607701e-03  1.8529929910478303e-03  1.8480584664097037e-03
  1.8429655506684891e-03  1.8377065757248963e-03  1.8322740366827478e-03  1.8266606094734811e-03  1.8208591684806513e-03
  1.8148628041644325e-03  1.8086648406861207e-03  1.8022588535326358e-03  1.7956386871410236e-03  1.7887984725229581e-03
  1.7817326448892436e-03  1.7744359612743173e-03  1.7669035181607506e-03  1.7591307691037523e-03  1.7511135423556700e-03
  1.7428480584904928e-03  1.7343309480283532e-03  1.7255592690600292e-03  1.7165305248714473e-03  1.7072426815681831e-03
  1.6976941856999650e-03  1.6878839818851754e-03  1.6778115304353542e-03  1.6674768249796991e-03  1.6568804100895690e-03
  1.6460233989029295e-03  1.6349074900423358e-03  1.6235349735191106e-03  1.6119087167087466e-03  1.6000321447924635e-03
  1.5879092210825231e-03  1.5755444273475438e-03  1.5629427441378146e-03  1.5501096311106102e-03  1.5370510073555051e-03
  1.5237732317196885e-03  1.5102830831332790e-03  1.4965877409346383e-03  1.4826947651956860e-03  1.4686120770472154e-03
  1.4543479390042061e-03  1.4399109352911399e-03  1.4253099521673144e-03  1.4105541582521588e-03  1.3956529848505466e-03
  1.3806161062781123e-03  1.3654534201865637e-03  1.3501750278889985e-03  1.3347912146852172e-03  1.3193124301870388e-03
  1.3037492686436142e-03  1.2881124492667422e-03  1.2724127965561825e-03  1.2566612206249710e-03  1.2408686975247348e-03
  1.2250462495710058e-03  1.2092049256685355e-03  1.1933557816366101e-03  1.1775098605343642e-03  1.1616781729860957e-03
  1.1458716775065809e-03  1.1301012608263882e-03  1.1143777182171925e-03  1.0987117338170905e-03  1.0831138609559152e-03
  1.0675945024805496e-03  1.0521638910802426e-03  1.0368320696119212e-03  1.0216088714255082e-03  1.0065039006892339e-03
  9.9152651271495204e-04  9.7668579428345469e-04  9.6199054396978536e-04  9.4744925246855469e-04  9.3307008291925472e-04
  9.1886085123157337e-04  9.0482900641070878e-04  8.9098161088268396e-04  8.7732532081966151e-04  8.6386636646525823e-04
  8.5061053245985888e-04  8.3756313816593187e-04  8.2472901799334288e-04  8.1211250172468646e-04  7.9971739539726444e-04
  7.8754697174706993e-04  7.7560397915353563e-04  7.6389065610006233e-04  7.5240874576666499e-04  7.4115951062261951e-04
  7.3014374701910959e-04  7.1936179978187328e-04  7.0881357680384956e-04  6.9849856363782519e-04  6.8841583808908115e-04
  6.7856408480803949e-04  6.6894160988291017e-04  6.5954635543233700e-04  6.5037591419804541e-04  6.4142754413748808e-04
  6.3269818301649216e-04  6.2418446300190587e-04  6.1588272525424522e-04  6.0778903452034022e-04  5.9989919372598218e-04
  5.9220875856857026e-04  5.8471305210975764e-04  5.7740717936809866e-04  5.7028604191169529e-04  5.6334435245084414e-04
  5.5657664943068233e-04  5.4997731162383513e-04  5.4354057272306203e-04  5.3726053593390372e-04  5.3113118856732799e-04
  5.2514641663237768e-04  5.1930001942881640e-04  5.1358572413977537e-04  5.0799720042440022e-04  5.0252807501049773e-04
  4.9717194628718243e-04  4.9192239889752276e-04  4.8677301833118886e-04  4.8171740551709809e-04  4.7674919141606231e-04
  4.7186205161343442e-04  4.6704972091175519e-04  4.6230600792339946e-04  4.5762480966322336e-04  4.5300012614121055e-04
  4.4842607495511929e-04  4.4389690588312859e-04  4.3940701547648544e-04  4.3495096165215101e-04  4.3052347828544758e-04
  4.2611948980270532e-04  4.2173412577390843e-04  4.1736273550534235e-04  4.1300090263224028e-04  4.0864445971142978e-04
  4.0428950281397926e-04  3.9993240611784251e-04  3.9556983618937948e-04  3.9119876036194646e-04  3.8681644289792927e-04
  3.8242043724266147e-04  3.7800857817221100e-04  3.7357897394116682e-04  3.6912999843042535e-04  3.6466028329497737e-04
  3.6016871011169428e-04  3.5565440252711484e-04  3.5111671840523174e-04  3.4655524197527827e-04  3.4196977597951477e-04
  3.3736033382101530e-04  3.3272713171145424e-04  3.2807058081889289e-04  3.2339127941556606e-04  3.1869000502566852e-04
  3.1396770657314186e-04  3.0922549652946083e-04  3.0446464306142004e-04  2.9968656217892067e-04  2.9489280988275683e-04
  2.9008507431240219e-04  2.8526516789379678e-04  2.8043501948713347e-04  2.7559666653464434e-04  2.7075224720838768e-04
  2.6590399255803430e-04  2.6105421865865405e-04  2.5620531875850279e-04  2.5135975542680855e-04  2.4652005270155847e-04
  2.4168878823728512e-04  2.3686858545285321e-04  2.3206210567924631e-04  2.2727204030735317e-04  2.2250110293575451e-04
  2.1775202151850962e-04  2.1302753051294276e-04  2.0833036302742995e-04  2.0366324296918555e-04  1.9902887719204867e-04
  1.9442994764426994e-04  1.8986910351629811e-04  1.8534895338856647e-04  1.8087205737927963e-04  1.7644091929219999e-04
  1.7205797876443442e-04  1.6772560341422071e-04  1.6344608098871436e-04  1.5922161151177505e-04  1.5505429943175322e-04
  1.5094614576927664e-04  1.4689904026503721e-04  1.4291475352757720e-04  1.3899492918107624e-04  1.3514107601313765e-04
  1.3135456026113892e-04  1.2763660080989766e-04  1.2398827083644811e-04  1.2041050166658113e-04  1.1690408669913468e-04
  1.1346968533028419e-04  1.1010782687783303e-04  1.0681891450550292e-04  1.0360322914722435e-04  1.0046093343142707e-04
  9.7392075605330392e-05  9.4396593459233764e-05  9.1474318250807122e-05  8.8624978629381319e-05  8.5848204560238562e-05
  8.3143531248902860e-05  8.0510403065430424e-05  7.7948177468700169e-05  7.5456128930704008e-05  7.3033452860837362e-05
  7.0679269530189677e-05  6.8392627995834661e-05  6.6172510025120881e-05  6.4017834019962082e-05  6.1927458941127687e-05
  5.9900188232533217e-05  5.7934773745530678e-05  5.6029919663198990e-05  5.4184286424634493e-05  5.2396494649241317e-05
  5.0665129061021775e-05  4.8988742412866887e-05  4.7365859410846746e-05  4.5794980638500933e-05  4.4274586481129018e-05
  4.2803141050080947e-05  4.1379096107047394e-05  4.0000894988350341e-05  3.8666976529233411e-05  3.7375778988152331e-05
  3.6125743971065333e-05  3.4915320355723571e-05  3.3742968215961605e-05  3.2607162745987850e-05  3.1506398184674882e-05
  3.0439191739849961e-05  2.9404087512585522e-05  2.8399660421489411e-05  2.7424520126995497e-05  2.6477314955654002e-05
  2.5556735824421993e-05  2.4661520164953767e-05  2.3790455847891282e-05  2.2942385107154619e-05  2.2116208464232343e-05
  2.1310888652472054e-05  2.0525454541370699e-05  1.9759005060865025e-05  1.9010713055190407e-05  1.8279827493226416e-05
  1.7565671782938446e-05  1.6867640653260381e-05  1.6185196986705615e-05  1.5517868651978090e-05  1.4865245336583327e-05
  1.4226975379439457e-05  1.3602762603488255e-05  1.2992363148306186e-05  1.2395582302715414e-05  1.1812271337394855e-05
  1.1242324337491208e-05  1.0685675035229979e-05  1.0142293642526517e-05  9.6121836835970585e-06  9.0953788275697437e-06
  8.5919397210956599e-06  8.1019508209598836e-06  7.6255172266924830e-06  7.1627615131795904e-06  6.7138205632744058e-06
  6.2788424004082457e-06  5.8579830212015725e-06  5.4514032280750169e-06  5.0592654618604355e-06  4.6817306344119244e-06
  4.3189549612168524e-06  3.9710867940069009e-06  3.6382634533691072e-06  3.3206080613568731e-06  3.0182263741010175e-06
  2.7312036144208034e-06  2.4596013044349732e-06  2.2034540981727730e-06  1.9627666141850008e-06  1.7375102681550344e-06
  1.5276201055098596e-06  1.3329916340310943e-06  1.1534776564660505e-06  9.8888510313874551e-07  8.3897186456093946e-07
  7.0344362404316371e-07  5.8195069030578584e-07  4.7408483008997318e-07  3.7937610076881225e-07  2.9728968295827563e-07
  2.2722271312828720e-07  1.6850111621374663e-07  1.2037643822556066e-07  8.2022678861698174e-08  5.2533124118174024e-08
  3.0917178900131162e-08  1.6097199632858386e-08  6.9053268728080930e-09  2.0803179186614559e-09  2.6437942232584305e-10
  0.0000000000000000e+00
  0.0000000000000000e+00  2.8415340001928831e+02  3.9378855428183289e+02  3.9837258390721206e+02  3.5976090598088075e+02
  3.2366403286683061e+02  3.1176971879830836e+02  3.2167005552037449e+02  3.3553107237134486e+02  3.3566822698904355e+02
  3.1657991044302332e+02  2.8581118097597169e+02  2.5729080912024517e+02  2.4057797213839643e+02  2.3604327202104537e+02
  2.3718007842496255e+02  2.3597136675540062e+02  2.2853302354603767e+02  2.1606019077790310e+02  2.0271975371588724e+02
  1.9238947208878324e+02  1.8621561718962107e+02  1.8287706159241415e+02  1.7997729553395448e+02  1.7577969837568574e+02
  1.7005841465614847e+02  1.6368549868222775e+02  1.5783484482596222e+02  1.5314769948438828e+02  1.4952129339677580e+02
  1.4640745581787812e+02  1.4323519420431489e+02  1.3976880765898804e+02  1.3611412669191262e+02  1.3254470740886057e+02
  1.2928940881406859e+02  1.2639698653029204e+02  1.2377098772311994e+02  1.2126196041755115e+02  1.1876780281853159e+02
  1.1627570495909436e+02  1.1383263343696954e+02  1.1149872648756876e+02  1.0930278167213024e+02  1.0723351917925332e+02
  1.0525743125368157e+02  1.0334147322009770e+02  1.0147096211682017e+02  9.9648878227280619e+01  9.7886407199172368e+01
  9.6192171066580087e+01  9.4565786153223939e+01  9.2999946945054148e+01  9.1485113388464967e+01  9.0014343434196491e+01
  8.8585160630185371e+01  8.7198010136638544e+01  8.5853988104306026e+01  8.4552756472459691e+01  8.3292186711667981e+01
  8.2069231288914324e+01  8.0880977781952126e+01  7.9725448694040566e+01  7.8601543164878962e+01  7.7508589392322307e+01
  7.6445849929265265e+01  7.5412234004548338e+01  7.4406397771711568e+01  7.3426954982514971e+01  7.2472686406872299e+01
  7.1542615735952495e+01  7.0635936991835720e+01  6.9751911130836532e+01  6.8889772102788157e+01  6.8048710930559750e+01
  6.7227913385760274e+01  6.6426603577433681e+01  6.5644075502717030e+01  6.4879688787588933e+01  6.4132848040458853e+01
  6.3402979822626463e+01  6.2689518918477297e+01  6.1991912034735634e+01  6.1309625775660258e+01  6.0642153908687014e+01
  5.9989019344238336e+01  5.9349770403450933e+01  5.8723975515814310e+01  5.8111218111270375e+01  5.7511095275622125e+01
  5.6923218821991007e+01  5.6347216266777799e+01  5.5782731217238236e+01  5.5229422698217682e+01  5.4686963817329783e+01
  5.4155040098439905e+01  5.3633348274923875e+01  5.3121596100227123e+01  5.2619502239968114e+01  5.2126795965558131e+01
  5.1643216779563581e+01  5.1168513983696911e+01  5.0702446066000881e+01  5.0244780009075605e+01  4.9795290925399222e+01
  4.9353761860128955e+01  4.8919983476565911e+01  4.8493753694495702e+01  4.8074877440513710e+01  4.7663166372569862e+01
  4.7258438500888474e+01  4.6860517857906515e+01  4.6469234327156144e+01  4.6084423441575773e+01  4.5705926110139593e+01
  4.5333588394688427e+01  4.4967261345581932e+01  4.4606800781676704e+01  4.4252067036732704e+01  4.3902924808182192e+01
  4.3559243053253034e+01  4.3220894836018260e+01  4.2887757146368479e+01  4.2559710739790880e+01  4.2236639954859065e+01
  4.1918432490380177e+01  4.1604979263623378e+01  4.1296174434797173e+01  4.0991915447703569e+01  4.0692103017142792e+01
  4.0396640928503757e+01  4.0105435641228055e+01  3.9818395825103387e+01  3.9535432014108579e+01  3.9256456915901516e+01
  3.8981386154577550e+01  3.8710139034816891e+01  3.8442638715095597e+01  3.8178810827454612e+01  3.7918581404422724e+01
  3.7661874848789267e+01  3.7408614087537345e+01  3.7158724368259151e+01  3.6912138083170795e+01  3.6668798789672891e+01
  3.6428658206306977e+01  3.6191665838015943e+01  3.5957757205125553e+01  3.5726846455852829e+01  3.5498839108204379e+01
  3.5273658302344302e+01  3.5051272345984501e+01  3.4831703192013386e+01  3.4614983749594671e+01  3.4401093052572676e+01
  3.4189893682224444e+01  3.3981139535137160e+01  3.3774599924027129e+01  3.3570216445102837e+01  3.3368233850086490e+01
  3.3169104479695307e+01  3.2973156145348099e+01  3.2780216870917464e+01  3.2589381730187938e+01  3.2399424562988862e+01
  3.2209640279933261e+01  3.2020725791942972e+01  3.1835048424192465e+01  3.1655278490116494e+01  3.1482319845494303e+01
  3.1313319767700854e+01  3.1141928173918867e+01  3.0962262293755614e+01  3.0773901566879282e+01  3.0586041132777012e+01
  3.0414443612232986e+01  3.0270895606474873e+01  3.0151328821778307e+01  3.0028379396614543e+01  2.9863964734566746e+01
  2.9635161819029182e+01  2.9361357336954100e+01  2.9116583466180138e+01  2.9002148735042631e+01  2.9102450270924106e+01
  2.9438708508333093e+01  2.9921218246143216e+01  3.0300116053992543e+01  2.9726722717544128e+01  2.9878226498344013e+01
  3.0020389946662970e+01  3.0153090416683312e+01  3.0276217218787846e+01  3.0389671591713181e+01  3.0493366664560074e+01
  3.0587227408660755e+01  3.0671190579303325e+01  3.0745204647313155e+01  3.0809229720491302e+01  3.0863237454909981e+01
  3.0907210956065036e+01  3.0941144669885432e+01  3.0965044263599808e+01  3.0978926496460005e+01  3.0982819080321665e+01
  3.0976760530081815e+01  3.0960800003973532e+01  3.0934997133717548e+01  3.0899421844530970e+01  3.0854154164992963e+01
  3.0799284026767488e+01  3.0734911054183058e+01  3.0661144343669505e+01  3.0578102233051805e+01  3.0485912060700887e+01
  3.0384709914541506e+01  3.0274640370917115e+01  3.0155856223311780e+01  3.0028518200929078e+01  2.9892794677128098e+01
  2.9748861367716394e+01  2.9596901019099992e+01  2.9437103086290431e+01  2.9269663400768810e+01  2.9094783828206882e+01
  2.8912671916045138e+01  2.8723540530927959e+01  2.8527607485995770e+01  2.8325095158034202e+01  2.8116230094480329e+01
  2.7901242610285877e+01  2.7680366374637487e+01  2.7453837987534005e+01  2.7221896546220776e+01  2.6984783201480973e+01
  2.6742740703783991e+01  2.6496012939290775e+01  2.6244844455716265e+01  2.5989479978048827e+01  2.5730163914126699e+01
  2.5467139850071462e+01  2.5200650035578580e+01  2.4930934859064916e+01  2.4658232312673281e+01  2.4382777447134035e+01
  2.4104801816483679e+01  2.3824532912740224e+01  2.3542193621077470e+01  2.3258001902353676e+01  2.2972170725743716e+01
  2.2684908042696108e+01  2.2396416764477710e+01  2.2106894743103055e+01  2.1816534755648323e+01  2.1525524491949856e+01
  2.1234046545687367e+01  2.0942278408851703e+01  2.0650392469597250e+01  2.0358556013478946e+01  2.0066931228073898e+01
  1.9775675210987618e+01  1.9484939981244889e+01  1.9194872494065191e+01  1.8905614659022820e+01  1.8617303361591535e+01
  1.8330070488073908e+01  1.8044042953915181e+01  1.7759342735401827e+01  1.7476086904744704e+01  1.7194387668546764e+01
  1.6914352409655457e+01  1.6636083732399698e+01  1.6359679511211450e+01  1.6085232942631944e+01  1.5812832600702480e+01
  1.5542562495739881e+01  1.5274502136496519e+01  1.5008726595704967e+01  1.4745306579007293e+01  1.4484308497268918e+01
  1.4225794542277127e+01  1.3969822765824176e+01  1.3716447162175001e+01  1.3465717753919568e+01  1.3217680681209821e+01
  1.2972378294381228e+01  1.2729849249958967e+01  1.2490128610048709e+01  1.2253247945112024e+01  1.2019235440126373e+01
  1.1788116004129767e+01  1.1559911383149977e+01  1.1334640276518392e+01  1.1112318456568493e+01  1.0892958891718925e+01
  1.0676571872941182e+01  1.0463165143611917e+01  1.0252744032749863e+01  1.0045311591637351e+01  9.8408687338264524e+00
  9.6394143785297555e+00  9.4409455973957037e+00  9.2454577646685934e+00  9.0529447107331755e+00  8.8633988790261142e+00
  8.6768114791207935e+00  8.4931725825957773e+00  8.3124711518246510e+00  8.1346950580245316e+00  7.9598310997114261e+00
  7.7878650216368905e+00  7.6187815342059615e+00  7.4525643333763965e+00  7.2891961210391818e+00  7.1286586258803668e+00
  6.9709326247241457e+00  6.8159979643572521e+00  6.6638335838346405e+00  6.5144175372664614e+00  6.3677270170863185e+00
  6.2237383778008173e+00  6.0824271602204076e+00  5.9437681161715172e+00  5.8077352336899670e+00  5.6743017626956842e+00
  5.5434402411487014e+00  5.4151225216864471e+00  5.2893197987423255e+00  5.1660026361455884e+00  5.0451409952024902e+00
  4.9267042632587419e+00  4.8106612827432507e+00  4.6969803806931463e+00  4.5856293987601049e+00  4.4765757236979526e+00
  4.3697863183315704e+00  4.2652277530070819e+00  4.1628662375233318e+00  4.0626676535446498e+00  3.9645975874949255e+00
  3.8686213639329345e+00  3.7747040794089952e+00  3.6828106368028908e+00  3.5929057801430919e+00  3.5049541299072531e+00
  3.4189202188040295e+00  3.3347685280361485e+00  3.2524635240447974e+00  3.1719696957352936e+00  3.0932515921840311e+00
  3.0162738608267405e+00  2.9410012861280230e+00  2.8673988287321732e+00  2.7954316650953057e+00  2.7250652275987566e+00
  2.6562652451437803e+00  2.5889977842275438e+00  2.5232292905003963e+00  2.4589266308044428e+00  2.3960571356933955e+00
  2.3345886424337268e+00  2.2744895384871024e+00  2.2157288054703330e+00  2.1582760614985008e+00  2.1021015848545228e+00
  2.0471763144575639e+00  1.9934718459079164e+00  1.9409604271775793e+00  1.8896149539797447e+00  1.8394089648171765e+00
  1.7903166357094911e+00  1.7423127745993363e+00  1.6953728154374685e+00  1.6494728119467310e+00  1.6045894310649271e+00
  1.5606999460665960e+00  1.5177822293636845e+00  1.4758147449851209e+00  1.4347765407352837e+00  1.3946472400313727e+00
  1.3554070334196768e+00  1.3170366697707419e+00  1.2795174471534354e+00  1.2428312033879136e+00  1.2069603062774843e+00
  1.1718876435193695e+00  1.1375966122943666e+00  1.1040711085354098e+00  1.0712955158750288e+00  1.0392546942717065e+00
  1.0079339683151363e+00  9.7731911521037806e-01  9.4739635244091258e-01  9.1815232511059519e-01  8.8957409296450696e-01
  8.6164911708870784e-01  8.3436524628888487e-01  8.0771070314790183e-01  7.8167406976224729e-01  7.5624427315737941e-01
  7.3141057038197388e-01  7.0716253328106715e-01  6.8349003294809685e-01  6.6038322385584858e-01  6.3783252766629239e-01
  6.1582861671932487e-01  5.9436239720040684e-01  5.7342499198709995e-01  5.5300772317450420e-01  5.3310209427959154e-01
  5.1369977212444129e-01  4.9479256839836999e-01  4.7637242089896659e-01  4.5843137445202081e-01  4.4096156151035099e-01
  4.2395518243153568e-01  4.0740448543453667e-01  3.9130174623522834e-01  3.7563924736081827e-01  3.6040925714317484e-01
  3.4560400839232464e-01  3.3121567775622407e-01  3.1723637476943112e-01  3.0365814375744260e-01  2.9047296827211794e-01
  2.7767277560714804e-01  2.6524944136947948e-01  2.5319479410669277e-01  2.4150061999033540e-01  2.3015866755520870e-01
  2.1916065249461011e-01  2.0849826251152934e-01  1.9816316222579883e-01  1.8814699813719959e-01  1.7844140364452044e-01
  1.6903800412057249e-01  1.5992842204315791e-01  1.5110428218199298e-01  1.4255721684158584e-01  1.3427887116006862e-01
  1.2626090846398424e-01  1.1849501567902751e-01  1.1097290879674071e-01  1.0368633839716351e-01  9.6627095227438120e-02
  8.9787015836367862e-02  8.3157988264931010e-02  7.6731957792748606e-02  7.0500932740507491e-02  6.4456990328336808e-02
  5.8592282590139662e-02  5.2899042343879321e-02  4.7369589217819690e-02  4.1996335732719846e-02  3.6771793439984171e-02
  3.1688579115765725e-02  2.6739421011025034e-02  2.1917165157542731e-02  1.7214781729887087e-02  1.2625371463336171e-02
  8.1421721277536267e-03  3.7585650574200077e-03 -5.3191826318180755e-04 -4.7355895576275762e-03 -8.8585970598562009e-03
 -1.2906918760521966e-02 -1.6886355597390486e-02 -2.0802524589781563e-02 -2.4660851917056487e-02 -2.8466565941151514e-02
 -3.2224690173156614e-02 -3.5940036183939553e-02 -3.9617196458816013e-02 -4.3260537196264687e-02 -4.6874191050688366e-02
 -5.0462049819219895e-02 -5.4027757072574178e-02 -5.7574700729946013e-02 -6.1106005578316407e-02 -6.4624526162040868e-02
 -6.8132844234888704e-02 -7.1633272634792133e-02 -7.5127860579128167e-02 -7.8618399079106449e-02 -8.2106426458028875e-02
 -8.5593233973421126e-02 -8.9079871543036371e-02 -9.2567153574730734e-02 -9.6055664900210821e-02 -9.9545766812653189e-02
 -1.0303760320819581e-01 -1.0653110683130142e-01 -1.1002600562399291e-01 -1.1352182917896070e-01 -1.1701791529654193e-01
 -1.2051341664557179e-01 -1.2400730752810674e-01 -1.2749839074801961e-01 -1.3098530458346688e-01 -1.3446652986322763e-01
 -1.3794039714691472e-01 -1.4140509400905793e-01 -1.4485867242705858e-01 -1.4829905627301698e-01 -1.5172404890943098e-01
 -1.5513134088876712e-01 -1.5851851775690326e-01 -1.6188306796044358e-01 -1.6522239085790527e-01 -1.6853380483477728e-01
 -1.7181455552245112e-01 -1.7506182412102336e-01 -1.7827273582597045e-01 -1.8144436835869512e-01 -1.8457376060094530e-01
 -1.8765792133310416e-01 -1.9069383807635298e-01 -1.9367848603870549e-01 -1.9660883716491420e-01 -1.9948186929024897e-01
 -2.0229457539814713e-01 -2.0504397298173596e-01 -2.0772711350922701e-01 -2.1034109199318210e-01 -2.1288305666365168e-01
 -2.1535021874518503e-01 -2.1773986233771236e-01 -2.2004935440129891e-01 -2.2227615484477073e-01 -2.2441782671821323e-01
 -2.2647204650934075e-01 -2.2843661454373862e-01 -2.3030946548897724e-01 -2.3208867896259758e-01 -2.3377249024396926e-01
 -2.3535930109002068e-01 -2.3684769065460379e-01 -2.3823642607652148e-01 -2.3952446801969213e-01 -2.4071096861052624e-01
 -2.4179526762100659e-01 -2.4277688856599167e-01 -2.4365553473776275e-01 -2.4443108517781614e-01 -2.4510359058589834e-01
 -2.4567326916628637e-01 -2.4614050241131183e-01 -2.4650583082212918e-01 -2.4676994956672843e-01 -2.4693370407519152e-01
 -2.4699808557219341e-01 -2.4696422654674707e-01 -2.4683339615919264e-01 -2.4660699558543084e-01 -2.4628655329840063e-01
 -2.4587372028680074e-01 -2.4537026521105584e-01 -2.4477806949652645e-01 -2.4409912236396342e-01 -2.4333551579720616e-01
 -2.4248943944812543e-01 -2.4156317547880998e-01 -2.4055909334099787e-01 -2.3947964449275125e-01 -2.3832735705237590e-01
 -2.3710483038958474e-01 -2.3581472965390554e-01 -2.3445978024033279e-01 -2.3304276219222358e-01 -2.3156650454143815e-01
 -2.3003387958572402e-01 -2.2844779710334467e-01 -2.2681119850495243e-01 -2.2512705092270516e-01 -2.2339834123662758e-01
 -2.2162807003821647e-01 -2.1981924553129020e-01 -2.1797487737008225e-01 -2.1609797043457923e-01 -2.1419151854310273e-01
 -2.1225849810213554e-01 -2.1030186169339207e-01 -2.0832453159813277e-01 -2.0632939325872302e-01 -2.0431928867743576e-01
 -2.0229700975249881e-01 -2.0026529155138603e-01 -1.9822680552135269e-01 -1.9618415263721509e-01 -1.9413985648637433e-01
 -1.9209635629108446e-01 -1.9005599986796423e-01 -1.8802103652475374e-01 -1.8599360989431479e-01 -1.8397575070595398e-01
 -1.8196936973903663e-01 -1.7997625388893040e-01 -1.7799806723818987e-01 -1.7603635336196707e-01 -1.7409253768704652e-01
 -1.7216792988547658e-01 -1.7026372630279779e-01 -1.6838101242086786e-01 -1.6652076535528371e-01 -1.6468385638739980e-01
 -1.6287105353094358e-01 -1.6108302413322773e-01 -1.5932033751095867e-01 -1.5758346762064265e-01 -1.5587279576358781e-01
 -1.5418861332550349e-01 -1.5253112455069606e-01 -1.5090044935086178e-01 -1.4929662614847605e-01 -1.4771961475477974e-01
 -1.4616929928236211e-01 -1.4464549109234059e-01 -1.4314793177613724e-01 -1.4167629617185210e-01 -1.4023019541523302e-01
 -1.3880918002524278e-01 -1.3741274302422224e-01 -1.3604032309265104e-01 -1.3469130775850435e-01 -1.3336503662120697e-01
 -1.3206080461018377e-01 -1.3077786527800711e-01 -1.2951543412814104e-01 -1.2827269197728208e-01 -1.2704878835229685e-01
 -1.2584284492175671e-01 -1.2465395896206867e-01 -1.2348120685820352e-01 -1.2232364763902047e-01 -1.2118032654718859e-01
 -1.2005027864370514e-01 -1.1893253244701044e-01 -1.1782611360669978e-01 -1.1673004861183175e-01 -1.1564336853383372e-01
 -1.1456511280400375e-01 -1.1349433302560950e-01 -1.1243009682058372e-01 -1.1137149171081659e-01 -1.1031762903404499e-01
 -1.0926764789433802e-01 -1.0822071914718000e-01 -1.0717604941914960e-01 -1.0613288516219613e-01 -1.0509051674251235e-01
 -1.0404828256400429e-01 -1.0300557322635749e-01 -1.0196183571767865e-01 -1.0091657751464002e-01 -9.9869368911038481e-02
 -9.8819842303219468e-02 -9.7767690672267066e-02 -9.6712666033268932e-02 -9.5654577866042298e-02 -9.4593291527321571e-02
 -9.3528726644406909e-02 -9.2460855490274330e-02 -9.1389701340146942e-02 -9.0315336809527552e-02 -8.9237882173692509e-02
 -8.8157503668646942e-02 -8.7074411773541097e-02 -8.5988859474548096e-02 -8.4901140510203046e-02 -8.3811587598203216e-02
 -8.2720570643669708e-02 -8.1628494928870324e-02 -8.0535799284403742e-02 -7.9442954241844957e-02 -7.8350460167851979e-02
 -7.7258845379734015e-02 -7.6168664242480630e-02 -7.5080495247252410e-02 -7.3994939071332894e-02 -7.2912616619541668e-02
 -7.1834167047108946e-02 -7.0760245764011243e-02 -6.9691522420768426e-02 -6.8628678875702079e-02 -6.7572407143655130e-02
 -6.6523407326172707e-02 -6.5482385523144379e-02 -6.4450051725907564e-02 -6.3427117691812432e-02 -6.2414294800247828e-02
 -6.1412291890128694e-02 -6.0421813078844672e-02 -5.9443555562670017e-02 -5.8478207398634824e-02 -5.7526445267857530e-02
 -5.6588932220338638e-02 -5.5666315401215860e-02 -5.4759223758480434e-02 -5.3868265732154766e-02 -5.2994026924931374e-02
 -5.2137067754273105e-02 -5.1297921085974627e-02 -5.0477089849185260e-02 -4.9675044632893017e-02 -4.8892221263869995e-02
 -4.8129018366079024e-02 -4.7385794901541607e-02 -4.6662867692667184e-02 -4.5960508926043586e-02 -4.5278943637688890e-02
 -4.4618347179770479e-02 -4.3978842743185226e-02 -4.3360500023758831e-02 -4.2763335984988909e-02 -4.2187316215622050e-02
 -4.1632356314048213e-02 -4.1098323287304846e-02 -4.0585036964690874e-02 -4.0092271425990325e-02 -3.9619756444305869e-02
 -3.9167178943502003e-02 -3.8734184470258094e-02 -3.8320378680731217e-02 -3.7925328841828622e-02 -3.7548565347090154e-02
 -3.7189583247180323e-02 -3.6847843794990218e-02 -3.6522776005349145e-02 -3.6213778229346058e-02 -3.5920219743260748e-02
 -3.5641442352104889e-02 -3.5376762007772698e-02 -3.5125470441801525e-02 -3.4886836812742121e-02 -3.4660109368138708e-02
 -3.4444517121118873e-02 -3.4239271541593091e-02 -3.4043568262064221e-02 -3.3856588798046580e-02 -3.3677502283094941e-02
 -3.3505467218443233e-02 -3.3339633237253009e-02 -3.3179142883471700e-02 -3.3023133405300678e-02 -3.2870738563273029e-02
 -3.2721090452941144e-02 -3.2573321342174083e-02 -3.2426565523064652e-02 -3.2279961178446379e-02 -3.2132652263020096e-02
 -3.1983790399090453e-02 -3.1832536786912106e-02 -3.1678064129645717e-02 -3.1519558572923691e-02 -3.1356221659025761e-02
 -3.1187272295664259e-02 -3.1011948739379232e-02 -3.0829510593543257e-02 -3.0639240820976115e-02 -3.0440447771169183e-02
 -3.0232467222119586e-02 -3.0014664436774190e-02 -2.9786436234083287e-02 -2.9547213074664125e-02 -2.9296461161074150e-02
 -2.9033684552694082e-02 -2.8758427295220684e-02 -2.8470275564769425e-02 -2.8168859826585187e-02 -2.7853856956733401e-02
 -2.7524991489959211e-02 -2.7182035154406956e-02 -2.6824805886648515e-02 -2.6453166824300732e-02 -2.6067025288454233e-02
 -2.5666331755913575e-02 -2.5251078821248784e-02 -2.4821300148658274e-02 -2.4377069413643124e-02 -2.3918499234492720e-02
 -2.3445740093581781e-02 -2.2958979248478738e-02 -2.2458439632865507e-02 -2.1944378747268605e-02 -2.1417087539601663e-02
 -2.0876889275519287e-02 -2.0324138398582301e-02 -1.9759219380234349e-02 -1.9182545559589880e-02 -1.8594557973033516e-02
 -1.7995724173630746e-02 -1.7386537040350026e-02 -1.6767513577096247e-02 -1.6139193701555553e-02 -1.5502139023851558e-02
 -1.4856931615012902e-02 -1.4204172765252206e-02 -1.3544481732056373e-02 -1.2878494478088271e-02 -1.2206862398899796e-02
 -1.1530251040456281e-02 -1.0849338806472293e-02 -1.0164815655558792e-02 -9.4773817881816762e-03 -8.7877463234316746e-03
 -8.0966259656056108e-03 -7.4047436605990712e-03 -6.7128272421103875e-03 -6.0216080676560504e-03 -5.3318196443974519e-03
 -4.6441962447789833e-03 -3.9594715119775758e-03 -3.2783770551635338e-03 -2.6016410345727705e-03 -1.9299867363904177e-03
 -1.2641311374458123e-03 -6.0478345971881414e-04  4.7356285342451177e-05  6.9159876269253952e-04  1.3272667897481789e-03
  1.9536968226365158e-03  2.5702404526318666e-03  3.1762659127811594e-03  3.7711595947180266e-03  4.3543275756654631e-03
  4.9251971556271840e-03  5.4832184047673149e-03  6.0278656963392687e-03  6.5586387815723792e-03  7.0750629013384813e-03
  7.5766885867887346e-03  8.0630914488979515e-03  8.5338719653012991e-03  8.9886552644233442e-03  9.4270909068994643e-03
  9.8488526642896250e-03  1.0253638295084499e-02  1.0641169318003964e-02  1.1011190782587945e-02  1.1363471037079610e-02
  1.1697801493600949e-02  1.2013996390620698e-02  1.2311892552714596e-02  1.2591349147618064e-02  1.2852247440571165e-02
  1.3094490545956005e-02  1.3318003176226410e-02  1.3522731388130023e-02  1.3708642326222738e-02  1.3875723963675495e-02
  1.4023984840373429e-02  1.4153453798307373e-02  1.4264179714257754e-02  1.4356231229770795e-02  1.4429696478427123e-02
  1.4484682810402697e-02  1.4521316514322140e-02  1.4539742536404375e-02  1.4540124196900669e-02  1.4522642903825014e-02
  1.4487497863976859e-02  1.4434905791256211e-02  1.4365100612271108e-02  1.4278333169237418e-02  1.4174870920171034e-02
  1.4054997636372390e-02  1.3919013097203378e-02  1.3767232782156589e-02  1.3599987560216919e-02  1.3417623376515551e-02
  1.3220500936276289e-02  1.3008995386054231e-02  1.2783495992266828e-02  1.2544405817017289e-02  1.2292141391210343e-02
  1.2027132384960374e-02  1.1749821275291885e-02  1.1460663011132369e-02  1.1160124675597466e-02  1.0848685145568570e-02
  1.0526834748562724e-02  1.0195074916894899e-02  9.8539178391326230e-03  9.5038861088429932e-03  9.1455123706320196e-03
  8.7793389591336590e-03  8.4059174439159237e-03  8.0258079685176700e-03  7.6395785152065824e-03  7.2478041624087020e-03
  6.8510663369280578e-03  6.4499520609563842e-03  6.0450531938729393e-03  5.6369656688344096e-03  5.2262887241549217e-03
  4.8136241294761311e-03  4.3995754067274167e-03  3.9847470458761686e-03  3.5697437154681684e-03  3.1551694679580558e-03
  2.7416269398299045e-03  2.3297165465078801e-03  1.9200356720569987e-03  1.5131778536739777e-03  1.1097319609681717e-03
  7.1028137003262422e-04  3.1540313230518760e-04 -7.4332861780238024e-05 -4.5836472435239822e-04 -8.3613941687125720e-04
 -1.2071136021064971e-03 -1.5707545013259059e-03 -1.9265407566936954e-03 -2.2739632988786913e-03 -2.6125262198724662e-03
 -2.9417476510173470e-03 -3.2611606462443436e-03 -3.5703140705209942e-03 -3.8687734935090846e-03 -4.1561220884323040e-03
 -4.4319615361538001e-03 -4.6959129344636089e-03 -4.9476177125760577e-03 -5.1867385508369982e-03 -5.4129603056410009e-03
 -5.6259909395584206e-03 -5.8255624566723920e-03 -6.0114318431257153e-03 -6.1833820128776688e-03 -6.3412227586706858e-03
 -6.4847917082069854e-03 -6.6139552855350734e-03 -6.7286096776461796e-03 -6.8286818062805732e-03 -6.9141303049438012e-03
 -6.9849465011328129e-03 -7.0411554037720318e-03 -7.0828166958592821e-03 -7.1100257323216511e-03 -7.1229145430812641e-03
 -7.1216528413309364e-03 -7.1064490370197570e-03 -7.0775512555485637e-03 -7.0352483307211684e-03 -6.9798700796306597e-03
 -6.9117858621106825e-03 -6.8314024981074679e-03 -6.7391621488224231e-03 -6.6355401832338227e-03 -6.5210430299976049e-03
 -6.3962060147272834e-03 -6.2615911826529617e-03 -6.1177851066594570e-03 -5.9653966807035330e-03 -5.8050548986102448e-03
 -5.6374066182483815e-03 -5.4631143110850282e-03 -5.2828537971192323e-03 -5.0973119651947741e-03 -4.9071844786920532e-03
 -4.7131734665990764e-03 -4.5159851999615561e-03 -4.3163277537121205e-03 -4.1149086538786253e-03 -3.9124325101715816e-03
 -3.7095986339506816e-03 -3.5070986415704467e-03 -3.3056140431049685e-03 -3.1058138164517719e-03 -2.9083519668147767e-03
 -2.7138650715663659e-03 -2.5229698104885794e-03 -2.3362604813933949e-03 -2.1543065011221238e-03 -1.9776498919239277e-03
 -1.8068027532134232e-03 -1.6422447187074099e-03 -1.4844203989406979e-03 -1.3337368091610523e-03 -1.1905607826032351e-03
 -1.0552163691421648e-03 -9.2798221932518014e-04 -8.0908895378340882e-04 -6.9871651802225839e-04 -5.9699152259098985e-04
 -5.0398456863143032e-04 -4.1970755880576242e-04 -3.4411099360345267e-04 -2.7708125302726758e-04 -2.1843786365840495e-04
 -1.6793075110072759e-04 -1.2523747780411661e-04 -8.9960466266923196e-05 -6.1624207617531530e-05 -3.9672455575032535e-05
 -2.3465405789001921e-05 -1.2276860558387829e-05 -5.2913789295094496e-06 -1.6014121731681253e-06 -2.0442464083484893e-07
  0.0000000000000000e+00
  0.0000000000000000e+00  2.8415340001928831e+02  3.9378855428183289e+02  3.9837258390721206e+02  3.5976090598088075e+02
  3.2366403286683061e+02  3.1176971879830836e+02  3.2167005552037449e+02  3.3553107237134486e+02  3.3566822698904355e+02
  3.1657991044302332e+02  2.8581118097597169e+02  2.5729080912024517e+02  2.4057797213839643e+02  2.3604327202104537e+02
  2.3718007842496255e+02  2.3597136675540062e+02  2.2853302354603767e+02  2.1606019077790310e+02  2.0271975371588724e+02
  1.9238947208878324e+02  1.8621561718962107e+02  1.8287706159241415e+02  1.7997729553395448e+02  1.7577969837568574e+02
  1.7005841465614847e+02  1.6368549868222775e+02  1.5783484482596222e+02  1.5314769948438828e+02  1.4952129339677580e+02
  1.4640745581787812e+02  1.4323519420431489e+02  1.3976880765898804e+02  1.3611412669191262e+02  1.3254470740886057e+02
  1.2928940881406859e+02  1.2639698653029204e+02  1.2377098772311994e+02  1.2126196041755115e+02  1.1876780281853159e+02
  1.1627570495909436e+02  1.1383263343696954e+02  1.1149872648756876e+02  1.0930278167213024e+02  1.0723351917925332e+02
  1.0525743125368157e+02  1.0334147322009770e+02  1.0147096211682017e+02  9.9648878227280619e+01  9.7886407199172368e+01
  9.6192171066580087e+01  9.4565786153223939e+01  9.2999946945054148e+01  9.1485113388464967e+01  9.0014343434196491e+01
  8.8585160630185371e+01  8.7198010136638544e+01  8.5853988104306026e+01  8.4552756472459691e+01  8.3292186711667981e+01
  8.2069231288914324e+01  8.0880977781952126e+01  7.9725448694040566e+01  7.8601543164878962e+01  7.7508589392322307e+01
  7.6445849929265265e+01  7.5412234004548338e+01  7.4406397771711568e+01  7.3426954982514971e+01  7.2472686406872299e+01
  7.1542615735952495e+01  7.0635936991835720e+01  6.9751911130836532e+01  6.8889772102788157e+01  6.8048710930559750e+01
  6.7227913385760274e+01  6.6426603577433681e+01  6.5644075502717030e+01  6.4879688787588933e+01  6.4132848040458853e+01
  6.3402979822626463e+01  6.2689518918477297e+01  6.1991912034735634e+01  6.1309625775660258e+01  6.0642153908687014e+01
  5.9989019344238336e+01  5.9349770403450933e+01  5.8723975515814310e+01  5.8111218111270375e+01  5.7511095275622125e+01
  5.6923218821991007e+01  5.6347216266777799e+01  5.5782731217238236e+01  5.5229422698217682e+01  5.4686963817329783e+01
  5.4155040098439905e+01  5.3633348274923875e+01  5.3121596100227123e+01  5.2619502239968114e+01  5.2126795965558131e+01
  5.1643216779563581e+01  5.1168513983696911e+01  5.0702446066000881e+01  5.0244780009075605e+01  4.9795290925399222e+01
  4.9353761860128955e+01  4.8919983476565911e+01  4.8493753694495702e+01  4.8074877440513710e+01  4.7663166372569862e+01
  4.7258438500888474e+01  4.6860517857906515e+01  4.6469234327156144e+01  4.6084423441575773e+01  4.5705926110139593e+01
  4.5333588394688427e+01  4.4967261345581932e+01  4.4606800781676704e+01  4.4252067036732704e+01  4.3902924808182192e+01
  4.3559243053253034e+01  4.3220894836018260e+01  4.2887757146368479e+01  4.2559710739790880e+01  4.2236639954859065e+01
  4.1918432490380177e+01  4.1604979263623378e+01  4.1296174434797173e+01  4.0991915447703569e+01  4.0692103017142792e+01
  4.0396640928503757e+01  4.0105435641228055e+01  3.9818395825103387e+01  3.9535432014108579e+01  3.9256456915901516e+01
  3.8981386154577550e+01  3.8710139034816891e+01  3.8442638715095597e+01  3.8178810827454612e+01  3.7918581404422724e+01
  3.7661874848789267e+01  3.7408614087537345e+01  3.7158724368259151e+01  3.6912138083170795e+01  3.6668798789672891e+01
  3.6428658206306977e+01  3.6191665838015943e+01  3.5957757205125553e+01  3.5726846455852829e+01  3.5498839108204379e+01
  3.5273658302344302e+01  3.5051272345984501e+01  3.4831703192013386e+01  3.4614983749594671e+01  3.4401093052572676e+01
  3.4189893682224444e+01  3.3981139535137160e+01  3.3774599924027129e+01  3.3570216445102837e+01  3.3368233850086490e+01
  3.3169104479695307e+01  3.2973156145348099e+01  3.2780216870917464e+01  3.2589381730187938e+01  3.2399424562988862e+01
  3.2209640279933261e+01  3.2020725791942972e+01  3.1835048424192465e+01  3.1655278490116494e+01  3.1482319845494303e+01
  3.1313319767700854e+01  3.1141928173918867e+01  3.0962262293755614e+01  3.0773901566879282e+01  3.0586041132777012e+01
  3.0414443612232986e+01  3.0270895606474873e+01  3.0151328821778307e+01  3.0028379396614543e+01  2.9863964734566746e+01
  2.9635161819029182e+01  2.9361357336954100e+01  2.9116583466180138e+01  2.9002148735042631e+01  2.9102450270924106e+01
  2.9438708508333093e+01  2.9921218246143216e+01  3.0300116053992543e+01  2.9726722717544128e+01  2.9878226498344013e+01
  3.0020389946662970e+01  3.0153090416683312e+01  3.0276217218787846e+01  3.0389671591713181e+01  3.0493366664560074e+01
  3.0587227408660755e+01  3.0671190579303325e+01  3.0745204647313155e+01  3.0809229720491302e+01  3.0863237454909981e+01
  3.0907210956065036e+01  3.0941144669885432e+01  3.0965044263599808e+01  3.0978926496460005e+01  3.0982819080321665e+01
  3.0976760530081815e+01  3.0960800003973532e+01  3.0934997133717548e+01  3.0899421844530970e+01  3.0854154164992963e+01
  3.0799284026767488e+01  3.0734911054183058e+01  3.0661144343669505e+01  3.0578102233051805e+01  3.0485912060700887e+01
  3.0384709914541506e+01  3.0274640370917115e+01  3.0155856223311780e+01  3.0028518200929078e+01  2.9892794677128098e+01
  2.9748861367716394e+01  2.9596901019099992e+01  2.9437103086290431e+01  2.9269663400768810e+01  2.9094783828206882e+01
  2.8912671916045138e+01  2.8723540530927959e+01  2.8527607485995770e+01  2.8325095158034202e+01  2.8116230094480329e+01
  2.7901242610285877e+01  2.7680366374637487e+01  2.7453837987534005e+01  2.7221896546220776e+01  2.6984783201480973e+01
  2.6742740703783991e+01  2.6496012939290775e+01  2.6244844455716265e+01  2.5989479978048827e+01  2.5730163914126699e+01
  2.5467139850071462e+01  2.5200650035578580e+01  2.4930934859064916e+01  2.4658232312673281e+01  2.4382777447134035e+01
  2.4104801816483679e+01  2.3824532912740224e+01  2.3542193621077470e+01  2.3258001902353676e+01  2.2972170725743716e+01
  2.2684908042696108e+01  2.2396416764477710e+01  2.2106894743103055e+01  2.1816534755648323e+01  2.1525524491949856e+01
  2.1234046545687367e+01  2.0942278408851703e+01  2.0650392469597250e+01  2.0358556013478946e+01  2.0066931228073898e+01
  1.9775675210987618e+01  1.9484939981244889e+01  1.9194872494065191e+01  1.8905614659022820e+01  1.8617303361591535e+01
  1.8330070488073908e+01  1.8044042953915181e+01  1.7759342735401827e+01  1.7476086904744704e+01  1.7194387668546764e+01
  1.6914352409655457e+01  1.6636083732399698e+01  1.6359679511211450e+01  1.6085232942631944e+01  1.5812832600702480e+01
  1.5542562495739881e+01  1.5274502136496519e+01  1.5008726595704967e+01  1.4745306579007293e+01  1.4484308497268918e+01
  1.4225794542277127e+01  1.3969822765824176e+01  1.3716447162175001e+01  1.3465717753919568e+01  1.3217680681209821e+01
  1.2972378294381228e+01  1.2729849249958967e+01  1.2490128610048709e+01  1.2253247945112024e+01  1.2019235440126373e+01
  1.1788116004129767e+01  1.1559911383149977e+01  1.1334640276518392e+01  1.1112318456568493e+01  1.0892958891718925e+01
  1.0676571872941182e+01  1.0463165143611917e+01  1.0252744032749863e+01  1.0045311591637351e+01  9.8408687338264524e+00
  9.6394143785297555e+00  9.4409455973957037e+00  9.2454577646685934e+00  9.0529447107331755e+00  8.8633988790261142e+00
  8.6768114791207935e+00  8.4931725825957773e+00  8.3124711518246510e+00  8.1346950580245316e+00  7.9598310997114261e+00
  7.7878650216368905e+00  7.6187815342059615e+00  7.4525643333763965e+00  7.2891961210391818e+00  7.1286586258803668e+00
  6.9709326247241457e+00  6.8159979643572521e+00  6.6638335838346405e+00  6.5144175372664614e+00  6.3677270170863185e+00
  6.2237383778008173e+00  6.0824271602204076e+00  5.9437681161715172e+00  5.8077352336899670e+00  5.6743017626956842e+00
  5.5434402411487014e+00  5.4151225216864471e+00  5.2893197987423255e+00  5.1660026361455884e+00  5.0451409952024902e+00
  4.9267042632587419e+00  4.8106612827432507e+00  4.6969803806931463e+00  4.5856293987601049e+00  4.4765757236979526e+00
  4.3697863183315704e+00  4.2652277530070819e+00  4.1628662375233318e+00  4.0626676535446498e+00  3.9645975874949255e+00
  3.8686213639329345e+00  3.7747040794089952e+00  3.6828106368028908e+00  3.5929057801430919e+00  3.5049541299072531e+00
  3.4189202188040295e+00  3.3347685280361485e+00  3.2524635240447974e+00  3.1719696957352936e+00  3.0932515921840311e+00
  3.0162738608267405e+00  2.9410012861280230e+00  2.8673988287321732e+00  2.7954316650953057e+00  2.7250652275987566e+00
  2.6562652451437803e+00  2.5889977842275438e+00  2.5232292905003963e+00  2.4589266308044428e+00  2.3960571356933955e+00
  2.3345886424337268e+00  2.2744895384871024e+00  2.2157288054703330e+00  2.1582760614985008e+00  2.1021015848545228e+00
  2.0471763144575639e+00  1.9934718459079164e+00  1.9409604271775793e+00  1.8896149539797447e+00  1.8394089648171765e+00
  1.7903166357094911e+00  1.7423127745993363e+00  1.6953728154374685e+00  1.6494728119467310e+00  1.6045894310649271e+00
  1.5606999460665960e+00  1.5177822293636845e+00  1.4758147449851209e+00  1.4347765407352837e+00  1.3946472400313727e+00
  1.3554070334196768e+00  1.3170366697707419e+00  1.2795174471534354e+00  1.2428312033879136e+00  1.2069603062774843e+00
  1.1718876435193695e+00  1.1375966122943666e+00  1.1040711085354098e+00  1.0712955158750288e+00  1.0392546942717065e+00
  1.0079339683151363e+00  9.7731911521037806e-01  9.4739635244091258e-01  9.1815232511059519e-01  8.8957409296450696e-01
  8.6164911708870784e-01  8.3436524628888487e-01  8.0771070314790183e-01  7.8167406976224729e-01  7.5624427315737941e-01
  7.3141057038197388e-01  7.0716253328106715e-01  6.8349003294809685e-01  6.6038322385584858e-01  6.3783252766629239e-01
  6.1582861671932487e-01  5.9436239720040684e-01  5.7342499198709995e-01  5.5300772317450420e-01  5.3310209427959154e-01
  5.1369977212444129e-01  4.9479256839836999e-01  4.7637242089896659e-01  4.5843137445202081e-01  4.4096156151035099e-01
  4.2395518243153568e-01  4.0740448543453667e-01  3.9130174623522834e-01  3.7563924736081827e-01  3.6040925714317484e-01
  3.4560400839232464e-01  3.3121567775622407e-01  3.1723637476943112e-01  3.0365814375744260e-01  2.9047296827211794e-01
  2.7767277560714804e-01  2.6524944136947948e-01  2.5319479410669277e-01  2.4150061999033540e-01  2.3015866755520870e-01
  2.1916065249461011e-01  2.0849826251152934e-01  1.9816316222579883e-01  1.8814699813719959e-01  1.7844140364452044e-01
  1.6903800412057249e-01  1.5992842204315791e-01  1.5110428218199298e-01  1.4255721684158584e-01  1.3427887116006862e-01
  1.2626090846398424e-01  1.1849501567902751e-01  1.1097290879674071e-01  1.0368633839716351e-01  9.6627095227438120e-02
  8.9787015836367862e-02  8.3157988264931010e-02  7.6731957792748606e-02  7.0500932740507491e-02  6.4456990328336808e-02
  5.8592282590139662e-02  5.2899042343879321e-02  4.7369589217819690e-02  4.1996335732719846e-02  3.6771793439984171e-02
  3.1688579115765725e-02  2.6739421011025034e-02  2.1917165157542731e-02  1.7214781729887087e-02  1.2625371463336171e-02
  8.1421721277536267e-03  3.7585650574200077e-03 -5.3191826318180755e-04 -4.7355895576275762e-03 -8.8585970598562009e-03
 -1.2906918760521966e-02 -1.6886355597390486e-02 -2.0802524589781563e-02 -2.4660851917056487e-02 -2.8466565941151514e-02
 -3.2224690173156614e-02 -3.5940036183939553e-02 -3.9617196458816013e-02 -4.3260537196264687e-02 -4.6874191050688366e-02
 -5.0462049819219895e-02 -5.4027757072574178e-02 -5.7574700729946013e-02 -6.1106005578316407e-02 -6.4624526162040868e-02
 -6.8132844234888704e-02 -7.1633272634792133e-02 -7.5127860579128167e-02 -7.8618399079106449e-02 -8.2106426458028875e-02
 -8.5593233973421126e-02 -8.9079871543036371e-02 -9.2567153574730734e-02 -9.6055664900210821e-02 -9.9545766812653189e-02
 -1.0303760320819581e-01 -1.0653110683130142e-01 -1.1002600562399291e-01 -1.1352182917896070e-01 -1.1701791529654193e-01
 -1.2051341664557179e-01 -1.2400730752810674e-01 -1.2749839074801961e-01 -1.3098530458346688e-01 -1.3446652986322763e-01
 -1.3794039714691472e-01 -1.4140509400905793e-01 -1.4485867242705858e-01 -1.4829905627301698e-01 -1.5172404890943098e-01
 -1.5513134088876712e-01 -1.5851851775690326e-01 -1.6188306796044358e-01 -1.6522239085790527e-01 -1.6853380483477728e-01
 -1.7181455552245112e-01 -1.7506182412102336e-01 -1.7827273582597045e-01 -1.8144436835869512e-01 -1.8457376060094530e-01
 -1.8765792133310416e-01 -1.9069383807635298e-01 -1.9367848603870549e-01 -1.9660883716491420e-01 -1.9948186929024897e-01
 -2.0229457539814713e-01 -2.0504397298173596e-01 -2.0772711350922701e-01 -2.1034109199318210e-01 -2.1288305666365168e-01
 -2.1535021874518503e-01 -2.1773986233771236e-01 -2.2004935440129891e-01 -2.2227615484477073e-01 -2.2441782671821323e-01
 -2.2647204650934075e-01 -2.2843661454373862e-01 -2.3030946548897724e-01 -2.3208867896259758e-01 -2.3377249024396926e-01
 -2.3535930109002068e-01 -2.3684769065460379e-01 -2.3823642607652148e-01 -2.3952446801969213e-01 -2.4071096861052624e-01
 -2.4179526762100659e-01 -2.4277688856599167e-01 -2.4365553473776275e-01 -2.4443108517781614e-01 -2.4510359058589834e-01
 -2.4567326916628637e-01 -2.4614050241131183e-01 -2.4650583082212918e-01 -2.4676994956672843e-01 -2.4693370407519152e-01
 -2.4699808557219341e-01 -2.4696422654674707e-01 -2.4683339615919264e-01 -2.4660699558543084e-01 -2.4628655329840063e-01
 -2.4587372028680074e-01 -2.4537026521105584e-01 -2.4477806949652645e-01 -2.4409912236396342e-01 -2.4333551579720616e-01
 -2.4248943944812543e-01 -2.4156317547880998e-01 -2.4055909334099787e-01 -2.3947964449275125e-01 -2.3832735705237590e-01
 -2.3710483038958474e-01 -2.3581472965390554e-01 -2.3445978024033279e-01 -2.3304276219222358e-01 -2.3156650454143815e-01
 -2.3003387958572402e-01 -2.2844779710334467e-01 -2.2681119850495243e-01 -2.2512705092270516e-01 -2.2339834123662758e-01
 -2.2162807003821647e-01 -2.1981924553129020e-01 -2.1797487737008225e-01 -2.1609797043457923e-01 -2.1419151854310273e-01
 -2.1225849810213554e-01 -2.1030186169339207e-01 -2.0832453159813277e-01 -2.0632939325872302e-01 -2.0431928867743576e-01
 -2.0229700975249881e-01 -2.0026529155138603e-01 -1.9822680552135269e-01 -1.9618415263721509e-01 -1.9413985648637433e-01
 -1.9209635629108446e-01 -1.9005599986796423e-01 -1.8802103652475374e-01 -1.8599360989431479e-01 -1.8397575070595398e-01
 -1.8196936973903663e-01 -1.7997625388893040e-01 -1.7799806723818987e-01 -1.7603635336196707e-01 -1.7409253768704652e-01
 -1.7216792988547658e-01 -1.7026372630279779e-01 -1.6838101242086786e-01 -1.6652076535528371e-01 -1.6468385638739980e-01
 -1.6287105353094358e-01 -1.6108302413322773e-01 -1.5932033751095867e-01 -1.5758346762064265e-01 -1.5587279576358781e-01
 -1.5418861332550349e-01 -1.5253112455069606e-01 -1.5090044935086178e-01 -1.4929662614847605e-01 -1.4771961475477974e-01
 -1.4616929928236211e-01 -1.4464549109234059e-01 -1.4314793177613724e-01 -1.4167629617185210e-01 -1.4023019541523302e-01
 -1.3880918002524278e-01 -1.3741274302422224e-01 -1.3604032309265104e-01 -1.3469130775850435e-01 -1.3336503662120697e-01
 -1.3206080461018377e-01 -1.3077786527800711e-01 -1.2951543412814104e-01 -1.2827269197728208e-01 -1.2704878835229685e-01
 -1.2584284492175671e-01 -1.2465395896206867e-01 -1.2348120685820352e-01 -1.2232364763902047e-01 -1.2118032654718859e-01
 -1.2005027864370514e-01 -1.1893253244701044e-01 -1.1782611360669978e-01 -1.1673004861183175e-01 -1.1564336853383372e-01
 -1.1456511280400375e-01 -1.1349433302560950e-01 -1.1243009682058372e-01 -1.1137149171081659e-01 -1.1031762903404499e-01
 -1.0926764789433802e-01 -1.0822071914718000e-01 -1.0717604941914960e-01 -1.0613288516219613e-01 -1.0509051674251235e-01
 -1.0404828256400429e-01 -1.0300557322635749e-01 -1.0196183571767865e-01 -1.0091657751464002e-01 -9.9869368911038481e-02
 -9.8819842303219468e-02 -9.7767690672267066e-02 -9.6712666033268932e-02 -9.5654577866042298e-02 -9.4593291527321571e-02
 -9.3528726644406909e-02 -9.2460855490274330e-02 -9.1389701340146942e-02 -9.0315336809527552e-02 -8.9237882173692509e-02
 -8.8157503668646942e-02 -8.7074411773541097e-02 -8.5988859474548096e-02 -8.4901140510203046e-02 -8.3811587598203216e-02
 -8.2720570643669708e-02 -8.1628494928870324e-02 -8.0535799284403742e-02 -7.9442954241844957e-02 -7.8350460167851979e-02
 -7.7258845379734015e-02 -7.6168664242480630e-02 -7.5080495247252410e-02 -7.3994939071332894e-02 -7.2912616619541668e-02
 -7.1834167047108946e-02 -7.0760245764011243e-02 -6.9691522420768426e-02 -6.8628678875702079e-02 -6.7572407143655130e-02
 -6.6523407326172707e-02 -6.5482385523144379e-02 -6.4450051725907564e-02 -6.3427117691812432e-02 -6.2414294800247828e-02
 -6.1412291890128694e-02 -6.0421813078844672e-02 -5.9443555562670017e-02 -5.8478207398634824e-02 -5.7526445267857530e-02
 -5.6588932220338638e-02 -5.5666315401215860e-02 -5.4759223758480434e-02 -5.3868265732154766e-02 -5.2994026924931374e-02
 -5.2137067754273105e-02 -5.1297921085974627e-02 -5.0477089849185260e-02 -4.9675044632893017e-02 -4.8892221263869995e-02
 -4.8129018366079024e-02 -4.7385794901541607e-02 -4.6662867692667184e-02 -4.5960508926043586e-02 -4.5278943637688890e-02
 -4.4618347179770479e-02 -4.3978842743185226e-02 -4.3360500023758831e-02 -4.2763335984988909e-02 -4.2187316215622050e-02
 -4.1632356314048213e-02 -4.1098323287304846e-02 -4.0585036964690874e-02 -4.0092271425990325e-02 -3.9619756444305869e-02
 -3.9167178943502003e-02 -3.8734184470258094e-02 -3.8320378680731217e-02 -3.7925328841828622e-02 -3.7548565347090154e-02
 -3.7189583247180323e-02 -3.6847843794990218e-02 -3.6522776005349145e-02 -3.6213778229346058e-02 -3.5920219743260748e-02
 -3.5641442352104889e-02 -3.5376762007772698e-02 -3.5125470441801525e-02 -3.4886836812742121e-02 -3.4660109368138708e-02
 -3.4444517121118873e-02 -3.4239271541593091e-02 -3.4043568262064221e-02 -3.3856588798046580e-02 -3.3677502283094941e-02
 -3.3505467218443233e-02 -3.3339633237253009e-02 -3.3179142883471700e-02 -3.3023133405300678e-02 -3.2870738563273029e-02
 -3.2721090452941144e-02 -3.2573321342174083e-02 -3.2426565523064652e-02 -3.2279961178446379e-02 -3.2132652263020096e-02
 -3.1983790399090453e-02 -3.1832536786912106e-02 -3.1678064129645717e-02 -3.1519558572923691e-02 -3.1356221659025761e-02
 -3.1187272295664259e-02 -3.1011948739379232e-02 -3.0829510593543257e-02 -3.0639240820976115e-02 -3.0440447771169183e-02
 -3.0232467222119586e-02 -3.0014664436774190e-02 -2.9786436234083287e-02 -2.9547213074664125e-02 -2.9296461161074150e-02
 -2.9033684552694082e-02 -2.8758427295220684e-02 -2.8470275564769425e-02 -2.8168859826585187e-02 -2.7853856956733401e-02
 -2.7524991489959211e-02 -2.7182035154406956e-02 -2.6824805886648515e-02 -2.6453166824300732e-02 -2.6067025288454233e-02
 -2.5666331755913575e-02 -2.5251078821248784e-02 -2.4821300148658274e-02 -2.4377069413643124e-02 -2.3918499234492720e-02
 -2.3445740093581781e-02 -2.2958979248478738e-02 -2.2458439632865507e-02 -2.1944378747268605e-02 -2.1417087539601663e-02
 -2.0876889275519287e-02 -2.0324138398582301e-02 -1.9759219380234349e-02 -1.9182545559589880e-02 -1.8594557973033516e-02
 -1.7995724173630746e-02 -1.7386537040350026e-02 -1.6767513577096247e-02 -1.6139193701555553e-02 -1.5502139023851558e-02
 -1.4856931615012902e-02 -1.4204172765252206e-02 -1.3544481732056373e-02 -1.2878494478088271e-02 -1.2206862398899796e-02
 -1.1530251040456281e-02 -1.0849338806472293e-02 -1.0164815655558792e-02 -9.4773817881816762e-03 -8.7877463234316746e-03
 -8.0966259656056108e-03 -7.4047436605990712e-03 -6.7128272421103875e-03 -6.0216080676560504e-03 -5.3318196443974519e-03
 -4.6441962447789833e-03 -3.9594715119775758e-03 -3.2783770551635338e-03 -2.6016410345727705e-03 -1.9299867363904177e-03
 -1.2641311374458123e-03 -6.0478345971881414e-04  4.7356285342451177e-05  6.9159876269253952e-04  1.3272667897481789e-03
  1.9536968226365158e-03  2.5702404526318666e-03  3.1762659127811594e-03  3.7711595947180266e-03  4.3543275756654631e-03
  4.9251971556271840e-03  5.4832184047673149e-03  6.0278656963392687e-03  6.5586387815723792e-03  7.0750629013384813e-03
  7.5766885867887346e-03  8.0630914488979515e-03  8.5338719653012991e-03  8.9886552644233442e-03  9.4270909068994643e-03
  9.8488526642896250e-03  1.0253638295084499e-02  1.0641169318003964e-02  1.1011190782587945e-02  1.1363471037079610e-02
  1.1697801493600949e-02  1.2013996390620698e-02  1.2311892552714596e-02  1.2591349147618064e-02  1.2852247440571165e-02
  1.3094490545956005e-02  1.3318003176226410e-02  1.3522731388130023e-02  1.3708642326222738e-02  1.3875723963675495e-02
  1.4023984840373429e-02  1.4153453798307373e-02  1.4264179714257754e-02  1.4356231229770795e-02  1.4429696478427123e-02
  1.4484682810402697e-02  1.4521316514322140e-02  1.4539742536404375e-02  1.4540124196900669e-02  1.4522642903825014e-02
  1.4487497863976859e-02  1.4434905791256211e-02  1.4365100612271108e-02  1.4278333169237418e-02  1.4174870920171034e-02
  1.4054997636372390e-02  1.3919013097203378e-02  1.3767232782156589e-02  1.3599987560216919e-02  1.3417623376515551e-02
  1.3220500936276289e-02  1.3008995386054231e-02  1.2783495992266828e-02  1.2544405817017289e-02  1.2292141391210343e-02
  1.2027132384960374e-02  1.1749821275291885e-02  1.1460663011132369e-02  1.1160124675597466e-02  1.0848685145568570e-02
  1.0526834748562724e-02  1.0195074916894899e-02  9.8539178391326230e-03  9.5038861088429932e-03  9.1455123706320196e-03
  8.7793389591336590e-03  8.4059174439159237e-03  8.0258079685176700e-03  7.6395785152065824e-03  7.2478041624087020e-03
  6.8510663369280578e-03  6.4499520609563842e-03  6.0450531938729393e-03  5.6369656688344096e-03  5.2262887241549217e-03
  4.8136241294761311e-03  4.3995754067274167e-03  3.9847470458761686e-03  3.5697437154681684e-03  3.1551694679580558e-03
  2.7416269398299045e-03  2.3297165465078801e-03  1.9200356720569987e-03  1.5131778536739777e-03  1.1097319609681717e-03
  7.1028137003262422e-04  3.1540313230518760e-04 -7.4332861780238024e-05 -4.5836472435239822e-04 -8.3613941687125720e-04
 -1.2071136021064971e-03 -1.5707545013259059e-03 -1.9265407566936954e-03 -2.2739632988786913e-03 -2.6125262198724662e-03
 -2.9417476510173470e-03 -3.2611606462443436e-03 -3.5703140705209942e-03 -3.8687734935090846e-03 -4.1561220884323040e-03
 -4.4319615361538001e-03 -4.6959129344636089e-03 -4.9476177125760577e-03 -5.1867385508369982e-03 -5.4129603056410009e-03
 -5.6259909395584206e-03 -5.8255624566723920e-03 -6.0114318431257153e-03 -6.1833820128776688e-03 -6.3412227586706858e-03
 -6.4847917082069854e-03 -6.6139552855350734e-03 -6.7286096776461796e-03 -6.8286818062805732e-03 -6.9141303049438012e-03
 -6.9849465011328129e-03 -7.0411554037720318e-03 -7.0828166958592821e-03 -7.1100257323216511e-03 -7.1229145430812641e-03
 -7.1216528413309364e-03 -7.1064490370197570e-03 -7.0775512555485637e-03 -7.0352483307211684e-03 -6.9798700796306597e-03
 -6.9117858621106825e-03 -6.8314024981074679e-03 -6.7391621488224231e-03 -6.6355401832338227e-03 -6.5210430299976049e-03
 -6.3962060147272834e-03 -6.2615911826529617e-03 -6.1177851066594570e-03 -5.9653966807035330e-03 -5.8050548986102448e-03
 -5.6374066182483815e-03 -5.4631143110850282e-03 -5.2828537971192323e-03 -5.0973119651947741e-03 -4.9071844786920532e-03
 -4.7131734665990764e-03 -4.5159851999615561e-03 -4.3163277537121205e-03 -4.1149086538786253e-03 -3.9124325101715816e-03
 -3.7095986339506816e-03 -3.5070986415704467e-03 -3.3056140431049685e-03 -3.1058138164517719e-03 -2.9083519668147767e-03
 -2.7138650715663659e-03 -2.5229698104885794e-03 -2.3362604813933949e-03 -2.1543065011221238e-03 -1.9776498919239277e-03
 -1.8068027532134232e-03 -1.6422447187074099e-03 -1.4844203989406979e-03 -1.3337368091610523e-03 -1.1905607826032351e-03
 -1.0552163691421648e-03 -9.2798221932518014e-04 -8.0908895378340882e-04 -6.9871651802225839e-04 -5.9699152259098985e-04
 -5.0398456863143032e-04 -4.1970755880576242e-04 -3.4411099360345267e-04 -2.7708125302726758e-04 -2.1843786365840495e-04
 -1.6793075110072759e-04 -1.2523747780411661e-04 -8.9960466266923196e-05 -6.1624207617531530e-05 -3.9672455575032535e-05
 -2.3465405789001921e-05 -1.2276860558387829e-05 -5.2913789295094496e-06 -1.6014121731681253e-06 -2.0442464083484893e-07
  0.0000000000000000e+00
  0.0000000000000000e+00  2.8415340001928831e+02  3.9378855428183289e+02  3.9837258390721206e+02  3.5976090598088075e+02
  3.2366403286683061e+02  3.1176971879830836e+02  3.2167005552037449e+02  3.3553107237134486e+02  3.3566822698904355e+02
  3.1657991044302332e+02  2.8581118097597169e+02  2.5729080912024517e+02  2.4057797213839643e+02  2.3604327202104537e+02
  2.3718007842496255e+02  2.3597136675540062e+02  2.2853302354603767e+02  2.1606019077790310e+02  2.0271975371588724e+02
  1.9238947208878324e+02  1.8621561718962107e+02  1.8287706159241415e+02  1.7997729553395448e+02  1.7577969837568574e+02
  1.7005841465614847e+02  1.6368549868222775e+02  1.5783484482596222e+02  1.5314769948438828e+02  1.4952129339677580e+02
  1.4640745581787812e+02  1.4323519420431489e+02  1.3976880765898804e+02  1.3611412669191262e+02  1.3254470740886057e+02
  1.2928940881406859e+02  1.2639698653029204e+02  1.2377098772311994e+02  1.2126196041755115e+02  1.1876780281853159e+02
  1.1627570495909436e+02  1.1383263343696954e+02  1.1149872648756876e+02  1.0930278167213024e+02  1.0723351917925332e+02
  1.0525743125368157e+02  1.0334147322009770e+02  1.0147096211682017e+02  9.9648878227280619e+01  9.7886407199172368e+01
  9.6192171066580087e+01  9.4565786153223939e+01  9.2999946945054148e+01  9.1485113388464967e+01  9.0014343434196491e+01
  8.8585160630185371e+01  8.7198010136638544e+01  8.5853988104306026e+01  8.4552756472459691e+01  8.3292186711667981e+01
  8.2069231288914324e+01  8.0880977781952126e+01  7.9725448694040566e+01  7.8601543164878962e+01  7.7508589392322307e+01
  7.6445849929265265e+01  7.5412234004548338e+01  7.4406397771711568e+01  7.3426954982514971e+01  7.2472686406872299e+01
  7.1542615735952495e+01  7.0635936991835720e+01  6.9751911130836532e+01  6.8889772102788157e+01  6.8048710930559750e+01
  6.7227913385760274e+01  6.6426603577433681e+01  6.5644075502717030e+01  6.4879688787588933e+01  6.4132848040458853e+01
  6.3402979822626463e+01  6.2689518918477297e+01  6.1991912034735634e+01  6.1309625775660258e+01  6.0642153908687014e+01
  5.9989019344238336e+01  5.9349770403450933e+01  5.8723975515814310e+01  5.8111218111270375e+01  5.7511095275622125e+01
  5.6923218821991007e+01  5.6347216266777799e+01  5.5782731217238236e+01  5.5229422698217682e+01  5.4686963817329783e+01
  5.4155040098439905e+01  5.3633348274923875e+01  5.3121596100227123e+01  5.2619502239968114e+01  5.2126795965558131e+01
  5.1643216779563581e+01  5.1168513983696911e+01  5.0702446066000881e+01  5.0244780009075605e+01  4.9795290925399222e+01
  4.9353761860128955e+01  4.8919983476565911e+01  4.8493753694495702e+01  4.8074877440513710e+01  4.7663166372569862e+01
  4.7258438500888474e+01  4.6860517857906515e+01  4.6469234327156144e+01  4.6084423441575773e+01  4.5705926110139593e+01
  4.5333588394688427e+01  4.4967261345581932e+01  4.4606800781676704e+01  4.4252067036732704e+01  4.3902924808182192e+01
  4.3559243053253034e+01  4.3220894836018260e+01  4.2887757146368479e+01  4.2559710739790880e+01  4.2236639954859065e+01
  4.1918432490380177e+01  4.1604979263623378e+01  4.1296174434797173e+01  4.0991915447703569e+01  4.0692103017142792e+01
  4.0396640928503757e+01  4.0105435641228055e+01  3.9818395825103387e+01  3.9535432014108579e+01  3.9256456915901516e+01
  3.8981386154577550e+01  3.8710139034816891e+01  3.8442638715095597e+01  3.8178810827454612e+01  3.7918581404422724e+01
  3.7661874848789267e+01  3.7408614087537345e+01  3.7158724368259151e+01  3.6912138083170795e+01  3.6668798789672891e+01
  3.6428658206306977e+01  3.6191665838015943e+01  3.5957757205125553e+01  3.5726846455852829e+01  3.5498839108204379e+01
  3.5273658302344302e+01  3.5051272345984501e+01  3.4831703192013386e+01  3.4614983749594671e+01  3.4401093052572676e+01
  3.4189893682224444e+01  3.3981139535137160e+01  3.3774599924027129e+01  3.3570216445102837e+01  3.3368233850086490e+01
  3.3169104479695307e+01  3.2973156145348099e+01  3.2780216870917464e+01  3.2589381730187938e+01  3.2399424562988862e+01
  3.2209640279933261e+01  3.2020725791942972e+01  3.1835048424192465e+01  3.1655278490116494e+01  3.1482319845494303e+01
  3.1313319767700854e+01  3.1141928173918867e+01  3.0962262293755614e+01  3.0773901566879282e+01  3.0586041132777012e+01
  3.0414443612232986e+01  3.0270895606474873e+01  3.0151328821778307e+01  3.0028379396614543e+01  2.9863964734566746e+01
  2.9635161819029182e+01  2.9361357336954100e+01  2.9116583466180138e+01  2.9002148735042631e+01  2.9102450270924106e+01
  2.9438708508333093e+01  2.9921218246143216e+01  3.0300116053992543e+01  2.9726722717544128e+01  2.9878226498344013e+01
  3.0020389946662970e+01  3.0153090416683312e+01  3.0276217218787846e+01  3.0389671591713181e+01  3.0493366664560074e+01
  3.0587227408660755e+01  3.0671190579303325e+01  3.0745204647313155e+01  3.0809229720491302e+01  3.0863237454909981e+01
  3.0907210956065036e+01  3.0941144669885432e+01  3.0965044263599808e+01  3.0978926496460005e+01  3.0982819080321665e+01
  3.0976760530081815e+01  3.0960800003973532e+01  3.0934997133717548e+01  3.0899421844530970e+01  3.0854154164992963e+01
  3.0799284026767488e+01  3.0734911054183058e+01  3.0661144343669505e+01  3.0578102233051805e+01  3.0485912060700887e+01
  3.0384709914541506e+01  3.0274640370917115e+01  3.0155856223311780e+01  3.0028518200929078e+01  2.9892794677128098e+01
  2.9748861367716394e+01  2.9596901019099992e+01  2.9437103086290431e+01  2.9269663400768810e+01  2.9094783828206882e+01
  2.8912671916045138e+01  2.8723540530927959e+01  2.8527607485995770e+01  2.8325095158034202e+01  2.8116230094480329e+01
  2.7901242610285877e+01  2.7680366374637487e+01  2.7453837987534005e+01  2.7221896546220776e+01  2.6984783201480973e+01
  2.6742740703783991e+01  2.6496012939290775e+01  2.6244844455716265e+01  2.5989479978048827e+01  2.5730163914126699e+01
  2.5467139850071462e+01  2.5200650035578580e+01  2.4930934859064916e+01  2.4658232312673281e+01  2.4382777447134035e+01
  2.4104801816483679e+01  2.3824532912740224e+01  2.3542193621077470e+01  2.3258001902353676e+01  2.2972170725743716e+01
  2.2684908042696108e+01  2.2396416764477710e+01  2.2106894743103055e+01  2.1816534755648323e+01  2.1525524491949856e+01
  2.1234046545687367e+01  2.0942278408851703e+01  2.0650392469597250e+01  2.0358556013478946e+01  2.0066931228073898e+01
  1.9775675210987618e+01  1.9484939981244889e+01  1.9194872494065191e+01  1.8905614659022820e+01  1.8617303361591535e+01
  1.8330070488073908e+01  1.8044042953915181e+01  1.7759342735401827e+01  1.7476086904744704e+01  1.7194387668546764e+01
  1.6914352409655457e+01  1.6636083732399698e+01  1.6359679511211450e+01  1.6085232942631944e+01  1.5812832600702480e+01
  1.5542562495739881e+01  1.5274502136496519e+01  1.5008726595704967e+01  1.4745306579007293e+01  1.4484308497268918e+01
  1.4225794542277127e+01  1.3969822765824176e+01  1.3716447162175001e+01  1.3465717753919568e+01  1.3217680681209821e+01
  1.2972378294381228e+01  1.2729849249958967e+01  1.2490128610048709e+01  1.2253247945112024e+01  1.2019235440126373e+01
  1.1788116004129767e+01  1.1559911383149977e+01  1.1334640276518392e+01  1.1112318456568493e+01  1.0892958891718925e+01
  1.0676571872941182e+01  1.0463165143611917e+01  1.0252744032749863e+01  1.0045311591637351e+01  9.8408687338264524e+00
  9.6394143785297555e+00  9.4409455973957037e+00  9.2454577646685934e+00  9.0529447107331755e+00  8.8633988790261142e+00
  8.6768114791207935e+00  8.4931725825957773e+00  8.3124711518246510e+00  8.1346950580245316e+00  7.9598310997114261e+00
  7.7878650216368905e+00  7.6187815342059615e+00  7.4525643333763965e+00  7.2891961210391818e+00  7.1286586258803668e+00
  6.9709326247241457e+00  6.8159979643572521e+00  6.6638335838346405e+00  6.5144175372664614e+00  6.3677270170863185e+00
  6.2237383778008173e+00  6.0824271602204076e+00  5.9437681161715172e+00  5.8077352336899670e+00  5.6743017626956842e+00
  5.5434402411487014e+00  5.4151225216864471e+00  5.2893197987423255e+00  5.1660026361455884e+00  5.0451409952024902e+00
  4.9267042632587419e+00  4.8106612827432507e+00  4.6969803806931463e+00  4.5856293987601049e+00  4.4765757236979526e+00
  4.3697863183315704e+00  4.2652277530070819e+00  4.1628662375233318e+00  4.0626676535446498e+00  3.9645975874949255e+00
  3.8686213639329345e+00  3.7747040794089952e+00  3.6828106368028908e+00  3.5929057801430919e+00  3.5049541299072531e+00
  3.4189202188040295e+00  3.3347685280361485e+00  3.2524635240447974e+00  3.1719696957352936e+00  3.0932515921840311e+00
  3.0162738608267405e+00  2.9410012861280230e+00  2.8673988287321732e+00  2.7954316650953057e+00  2.7250652275987566e+00
  2.6562652451437803e+00  2.5889977842275438e+00  2.5232292905003963e+00  2.4589266308044428e+00  2.3960571356933955e+00
  2.3345886424337268e+00  2.2744895384871024e+00  2.2157288054703330e+00  2.1582760614985008e+00  2.1021015848545228e+00
  2.0471763144575639e+00  1.9934718459079164e+00  1.9409604271775793e+00  1.8896149539797447e+00  1.8394089648171765e+00
  1.7903166357094911e+00  1.7423127745993363e+00  1.6953728154374685e+00  1.6494728119467310e+00  1.6045894310649271e+00
  1.5606999460665960e+00  1.5177822293636845e+00  1.4758147449851209e+00  1.4347765407352837e+00  1.3946472400313727e+00
  1.3554070334196768e+00  1.3170366697707419e+00  1.2795174471534354e+00  1.2428312033879136e+00  1.2069603062774843e+00
  1.1718876435193695e+00  1.1375966122943666e+00  1.1040711085354098e+00  1.0712955158750288e+00  1.0392546942717065e+00
  1.0079339683151363e+00  9.7731911521037806e-01  9.4739635244091258e-01  9.1815232511059519e-01  8.8957409296450696e-01
  8.6164911708870784e-01  8.3436524628888487e-01  8.0771070314790183e-01  7.8167406976224729e-01  7.5624427315737941e-01
  7.3141057038197388e-01  7.0716253328106715e-01  6.8349003294809685e-01  6.6038322385584858e-01  6.3783252766629239e-01
  6.1582861671932487e-01  5.9436239720040684e-01  5.7342499198709995e-01  5.5300772317450420e-01  5.3310209427959154e-01
  5.1369977212444129e-01  4.9479256839836999e-01  4.7637242089896659e-01  4.5843137445202081e-01  4.4096156151035099e-01
  4.2395518243153568e-01  4.0740448543453667e-01  3.9130174623522834e-01  3.7563924736081827e-01  3.6040925714317484e-01
  3.4560400839232464e-01  3.3121567775622407e-01  3.1723637476943112e-01  3.0365814375744260e-01  2.9047296827211794e-01
  2.7767277560714804e-01  2.6524944136947948e-01  2.5319479410669277e-01  2.4150061999033540e-01  2.3015866755520870e-01
  2.1916065249461011e-01  2.0849826251152934e-01  1.9816316222579883e-01  1.8814699813719959e-01  1.7844140364452044e-01
  1.6903800412057249e-01  1.5992842204315791e-01  1.5110428218199298e-01  1.4255721684158584e-01  1.3427887116006862e-01
  1.2626090846398424e-01  1.1849501567902751e-01  1.1097290879674071e-01  1.0368633839716351e-01  9.6627095227438120e-02
  8.9787015836367862e-02  8.3157988264931010e-02  7.6731957792748606e-02  7.0500932740507491e-02  6.4456990328336808e-02
  5.8592282590139662e-02  5.2899042343879321e-02  4.7369589217819690e-02  4.1996335732719846e-02  3.6771793439984171e-02
  3.1688579115765725e-02  2.6739421011025034e-02  2.1917165157542731e-02  1.7214781729887087e-02  1.2625371463336171e-02
  8.1421721277536267e-03  3.7585650574200077e-03 -5.3191826318180755e-04 -4.7355895576275762e-03 -8.8585970598562009e-03
 -1.2906918760521966e-02 -1.6886355597390486e-02 -2.0802524589781563e-02 -2.4660851917056487e-02 -2.8466565941151514e-02
 -3.2224690173156614e-02 -3.5940036183939553e-02 -3.9617196458816013e-02 -4.3260537196264687e-02 -4.6874191050688366e-02
 -5.0462049819219895e-02 -5.4027757072574178e-02 -5.7574700729946013e-02 -6.1106005578316407e-02 -6.4624526162040868e-02
 -6.8132844234888704e-02 -7.1633272634792133e-02 -7.5127860579128167e-02 -7.8618399079106449e-02 -8.2106426458028875e-02
 -8.5593233973421126e-02 -8.9079871543036371e-02 -9.2567153574730734e-02 -9.6055664900210821e-02 -9.9545766812653189e-02
 -1.0303760320819581e-01 -1.0653110683130142e-01 -1.1002600562399291e-01 -1.1352182917896070e-01 -1.1701791529654193e-01
 -1.2051341664557179e-01 -1.2400730752810674e-01 -1.2749839074801961e-01 -1.3098530458346688e-01 -1.3446652986322763e-01
 -1.3794039714691472e-01 -1.4140509400905793e-01 -1.4485867242705858e-01 -1.4829905627301698e-01 -1.5172404890943098e-01
 -1.5513134088876712e-01 -1.5851851775690326e-01 -1.6188306796044358e-01 -1.6522239085790527e-01 -1.6853380483477728e-01
 -1.7181455552245112e-01 -1.7506182412102336e-01 -1.7827273582597045e-01 -1.8144436835869512e-01 -1.8457376060094530e-01
 -1.8765792133310416e-01 -1.9069383807635298e-01 -1.9367848603870549e-01 -1.9660883716491420e-01 -1.9948186929024897e-01
 -2.0229457539814713e-01 -2.0504397298173596e-01 -2.0772711350922701e-01 -2.1034109199318210e-01 -2.1288305666365168e-01
 -2.1535021874518503e-01 -2.1773986233771236e-01 -2.2004935440129891e-01 -2.2227615484477073e-01 -2.2441782671821323e-01
 -2.2647204650934075e-01 -2.2843661454373862e-01 -2.3030946548897724e-01 -2.3208867896259758e-01 -2.3377249024396926e-01
 -2.3535930109002068e-01 -2.3684769065460379e-01 -2.3823642607652148e-01 -2.3952446801969213e-01 -2.4071096861052624e-01
 -2.4179526762100659e-01 -2.4277688856599167e-01 -2.4365553473776275e-01 -2.4443108517781614e-01 -2.4510359058589834e-01
 -2.4567326916628637e-01 -2.4614050241131183e-01 -2.4650583082212918e-01 -2.4676994956672843e-01 -2.4693370407519152e-01
 -2.4699808557219341e-01 -2.4696422654674707e-01 -2.4683339615919264e-01 -2.4660699558543084e-01 -2.4628655329840063e-01
 -2.4587372028680074e-01 -2.4537026521105584e-01 -2.4477806949652645e-01 -2.4409912236396342e-01 -2.4333551579720616e-01
 -2.4248943944812543e-01 -2.4156317547880998e-01 -2.4055909334099787e-01 -2.3947964449275125e-01 -2.3832735705237590e-01
 -2.3710483038958474e-01 -2.3581472965390554e-01 -2.3445978024033279e-01 -2.3304276219222358e-01 -2.3156650454143815e-01
 -2.3003387958572402e-01 -2.2844779710334467e-01 -2.2681119850495243e-01 -2.2512705092270516e-01 -2.2339834123662758e-01
 -2.2162807003821647e-01 -2.1981924553129020e-01 -2.1797487737008225e-01 -2.1609797043457923e-01 -2.1419151854310273e-01
 -2.1225849810213554e-01 -2.1030186169339207e-01 -2.0832453159813277e-01 -2.0632939325872302e-01 -2.0431928867743576e-01
 -2.0229700975249881e-01 -2.0026529155138603e-01 -1.9822680552135269e-01 -1.9618415263721509e-01 -1.9413985648637433e-01
 -1.9209635629108446e-01 -1.9005599986796423e-01 -1.8802103652475374e-01 -1.8599360989431479e-01 -1.8397575070595398e-01
 -1.8196936973903663e-01 -1.7997625388893040e-01 -1.7799806723818987e-01 -1.7603635336196707e-01 -1.7409253768704652e-01
 -1.7216792988547658e-01 -1.7026372630279779e-01 -1.6838101242086786e-01 -1.6652076535528371e-01 -1.6468385638739980e-01
 -1.6287105353094358e-01 -1.6108302413322773e-01 -1.5932033751095867e-01 -1.5758346762064265e-01 -1.5587279576358781e-01
 -1.5418861332550349e-01 -1.5253112455069606e-01 -1.5090044935086178e-01 -1.4929662614847605e-01 -1.4771961475477974e-01
 -1.4616929928236211e-01 -1.4464549109234059e-01 -1.4314793177613724e-01 -1.4167629617185210e-01 -1.4023019541523302e-01
 -1.3880918002524278e-01 -1.3741274302422224e-01 -1.3604032309265104e-01 -1.3469130775850435e-01 -1.3336503662120697e-01
 -1.3206080461018377e-01 -1.3077786527800711e-01 -1.2951543412814104e-01 -1.2827269197728208e-01 -1.2704878835229685e-01
 -1.2584284492175671e-01 -1.2465395896206867e-01 -1.2348120685820352e-01 -1.2232364763902047e-01 -1.2118032654718859e-01
 -1.2005027864370514e-01 -1.1893253244701044e-01 -1.1782611360669978e-01 -1.1673004861183175e-01 -1.1564336853383372e-01
 -1.1456511280400375e-01 -1.1349433302560950e-01 -1.1243009682058372e-01 -1.1137149171081659e-01 -1.1031762903404499e-01
 -1.0926764789433802e-01 -1.0822071914718000e-01 -1.0717604941914960e-01 -1.0613288516219613e-01 -1.0509051674251235e-01
 -1.0404828256400429e-01 -1.0300557322635749e-01 -1.0196183571767865e-01 -1.0091657751464002e-01 -9.9869368911038481e-02
 -9.8819842303219468e-02 -9.7767690672267066e-02 -9.6712666033268932e-02 -9.5654577866042298e-02 -9.4593291527321571e-02
 -9.3528726644406909e-02 -9.2460855490274330e-02 -9.1389701340146942e-02 -9.0315336809527552e-02 -8.9237882173692509e-02
 -8.8157503668646942e-02 -8.7074411773541097e-02 -8.5988859474548096e-02 -8.4901140510203046e-02 -8.3811587598203216e-02
 -8.2720570643669708e-02 -8.1628494928870324e-02 -8.0535799284403742e-02 -7.9442954241844957e-02 -7.8350460167851979e-02
 -7.7258845379734015e-02 -7.6168664242480630e-02 -7.5080495247252410e-02 -7.3994939071332894e-02 -7.2912616619541668e-02
 -7.1834167047108946e-02 -7.0760245764011243e-02 -6.9691522420768426e-02 -6.8628678875702079e-02 -6.7572407143655130e-02
 -6.6523407326172707e-02 -6.5482385523144379e-02 -6.4450051725907564e-02 -6.3427117691812432e-02 -6.2414294800247828e-02
 -6.1412291890128694e-02 -6.0421813078844672e-02 -5.9443555562670017e-02 -5.8478207398634824e-02 -5.7526445267857530e-02
 -5.6588932220338638e-02 -5.5666315401215860e-02 -5.4759223758480434e-02 -5.3868265732154766e-02 -5.2994026924931374e-02
 -5.2137067754273105e-02 -5.1297921085974627e-02 -5.0477089849185260e-02 -4.9675044632893017e-02 -4.8892221263869995e-02
 -4.8129018366079024e-02 -4.7385794901541607e-02 -4.6662867692667184e-02 -4.5960508926043586e-02 -4.5278943637688890e-02
 -4.4618347179770479e-02 -4.3978842743185226e-02 -4.3360500023758831e-02 -4.2763335984988909e-02 -4.2187316215622050e-02
 -4.1632356314048213e-02 -4.1098323287304846e-02 -4.0585036964690874e-02 -4.0092271425990325e-02 -3.9619756444305869e-02
 -3.9167178943502003e-02 -3.8734184470258094e-02 -3.8320378680731217e-02 -3.7925328841828622e-02 -3.7548565347090154e-02
 -3.7189583247180323e-02 -3.6847843794990218e-02 -3.6522776005349145e-02 -3.6213778229346058e-02 -3.5920219743260748e-02
 -3.5641442352104889e-02 -3.5376762007772698e-02 -3.5125470441801525e-02 -3.4886836812742121e-02 -3.4660109368138708e-02
 -3.4444517121118873e-02 -3.4239271541593091e-02 -3.4043568262064221e-02 -3.3856588798046580e-02 -3.3677502283094941e-02
 -3.3505467218443233e-02 -3.3339633237253009e-02 -3.3179142883471700e-02 -3.3023133405300678e-02 -3.2870738563273029e-02
 -3.2721090452941144e-02 -3.2573321342174083e-02 -3.2426565523064652e-02 -3.2279961178446379e-02 -3.2132652263020096e-02
 -3.1983790399090453e-02 -3.1832536786912106e-02 -3.1678064129645717e-02 -3.1519558572923691e-02 -3.1356221659025761e-02
 -3.1187272295664259e-02 -3.1011948739379232e-02 -3.0829510593543257e-02 -3.0639240820976115e-02 -3.0440447771169183e-02
 -3.0232467222119586e-02 -3.0014664436774190e-02 -2.9786436234083287e-02 -2.9547213074664125e-02 -2.9296461161074150e-02
 -2.9033684552694082e-02 -2.8758427295220684e-02 -2.8470275564769425e-02 -2.8168859826585187e-02 -2.7853856956733401e-02
 -2.7524991489959211e-02 -2.7182035154406956e-02 -2.6824805886648515e-02 -2.6453166824300732e-02 -2.6067025288454233e-02
 -2.5666331755913575e-02 -2.5251078821248784e-02 -2.4821300148658274e-02 -2.4377069413643124e-02 -2.3918499234492720e-02
 -2.3445740093581781e-02 -2.2958979248478738e-02 -2.2458439632865507e-02 -2.1944378747268605e-02 -2.1417087539601663e-02
 -2.0876889275519287e-02 -2.0324138398582301e-02 -1.9759219380234349e-02 -1.9182545559589880e-02 -1.8594557973033516e-02
 -1.7995724173630746e-02 -1.7386537040350026e-02 -1.6767513577096247e-02 -1.6139193701555553e-02 -1.5502139023851558e-02
 -1.4856931615012902e-02 -1.4204172765252206e-02 -1.3544481732056373e-02 -1.2878494478088271e-02 -1.2206862398899796e-02
 -1.1530251040456281e-02 -1.0849338806472293e-02 -1.0164815655558792e-02 -9.4773817881816762e-03 -8.7877463234316746e-03
 -8.0966259656056108e-03 -7.4047436605990712e-03 -6.7128272421103875e-03 -6.0216080676560504e-03 -5.3318196443974519e-03
 -4.6441962447789833e-03 -3.9594715119775758e-03 -3.2783770551635338e-03 -2.6016410345727705e-03 -1.9299867363904177e-03
 -1.2641311374458123e-03 -6.0478345971881414e-04  4.7356285342451177e-05  6.9159876269253952e-04  1.3272667897481789e-03
  1.9536968226365158e-03  2.5702404526318666e-03  3.1762659127811594e-03  3.7711595947180266e-03  4.3543275756654631e-03
  4.9251971556271840e-03  5.4832184047673149e-03  6.0278656963392687e-03  6.5586387815723792e-03  7.0750629013384813e-03
  7.5766885867887346e-03  8.0630914488979515e-03  8.5338719653012991e-03  8.9886552644233442e-03  9.4270909068994643e-03
  9.8488526642896250e-03  1.0253638295084499e-02  1.0641169318003964e-02  1.1011190782587945e-02  1.1363471037079610e-02
  1.1697801493600949e-02  1.2013996390620698e-02  1.2311892552714596e-02  1.2591349147618064e-02  1.2852247440571165e-02
  1.3094490545956005e-02  1.3318003176226410e-02  1.3522731388130023e-02  1.3708642326222738e-02  1.3875723963675495e-02
  1.4023984840373429e-02  1.4153453798307373e-02  1.4264179714257754e-02  1.4356231229770795e-02  1.4429696478427123e-02
  1.4484682810402697e-02  1.4521316514322140e-02  1.4539742536404375e-02  1.4540124196900669e-02  1.4522642903825014e-02
  1.4487497863976859e-02  1.4434905791256211e-02  1.4365100612271108e-02  1.4278333169237418e-02  1.4174870920171034e-02
  1.4054997636372390e-02  1.3919013097203378e-02  1.3767232782156589e-02  1.3599987560216919e-02  1.3417623376515551e-02
  1.3220500936276289e-02  1.3008995386054231e-02  1.2783495992266828e-02  1.2544405817017289e-02  1.2292141391210343e-02
  1.2027132384960374e-02  1.1749821275291885e-02  1.1460663011132369e-02  1.1160124675597466e-02  1.0848685145568570e-02
  1.0526834748562724e-02  1.0195074916894899e-02  9.8539178391326230e-03  9.5038861088429932e-03  9.1455123706320196e-03
  8.7793389591336590e-03  8.4059174439159237e-03  8.0258079685176700e-03  7.6395785152065824e-03  7.2478041624087020e-03
  6.8510663369280578e-03  6.4499520609563842e-03  6.0450531938729393e-03  5.6369656688344096e-03  5.2262887241549217e-03
  4.8136241294761311e-03  4.3995754067274167e-03  3.9847470458761686e-03  3.5697437154681684e-03  3.1551694679580558e-03
  2.7416269398299045e-03  2.3297165465078801e-03  1.9200356720569987e-03  1.5131778536739777e-03  1.1097319609681717e-03
  7.1028137003262422e-04  3.1540313230518760e-04 -7.4332861780238024e-05 -4.5836472435239822e-04 -8.3613941687125720e-04
 -1.2071136021064971e-03 -1.5707545013259059e-03 -1.9265407566936954e-03 -2.2739632988786913e-03 -2.6125262198724662e-03
 -2.9417476510173470e-03 -3.2611606462443436e-03 -3.5703140705209942e-03 -3.8687734935090846e-03 -4.1561220884323040e-03
 -4.4319615361538001e-03 -4.6959129344636089e-03 -4.9476177125760577e-03 -5.1867385508369982e-03 -5.4129603056410009e-03
 -5.6259909395584206e-03 -5.8255624566723920e-03 -6.0114318431257153e-03 -6.1833820128776688e-03 -6.3412227586706858e-03
 -6.4847917082069854e-03 -6.6139552855350734e-03 -6.7286096776461796e-03 -6.8286818062805732e-03 -6.9141303049438012e-03
 -6.9849465011328129e-03 -7.0411554037720318e-03 -7.0828166958592821e-03 -7.1100257323216511e-03 -7.1229145430812641e-03
 -7.1216528413309364e-03 -7.1064490370197570e-03 -7.0775512555485637e-03 -7.0352483307211684e-03 -6.9798700796306597e-03
 -6.9117858621106825e-03 -6.8314024981074679e-03 -6.7391621488224231e-03 -6.6355401832338227e-03 -6.5210430299976049e-03
 -6.3962060147272834e-03 -6.2615911826529617e-03 -6.1177851066594570e-03 -5.9653966807035330e-03 -5.8050548986102448e-03
 -5.6374066182483815e-03 -5.4631143110850282e-03 -5.2828537971192323e-03 -5.0973119651947741e-03 -4.9071844786920532e-03
 -4.7131734665990764e-03 -4.5159851999615561e-03 -4.3163277537121205e-03 -4.1149086538786253e-03 -3.9124325101715816e-03
 -3.7095986339506816e-03 -3.5070986415704467e-03 -3.3056140431049685e-03 -3.1058138164517719e-03 -2.9083519668147767e-03
 -2.7138650715663659e-03 -2.5229698104885794e-03 -2.3362604813933949e-03 -2.1543065011221238e-03 -1.9776498919239277e-03
 -1.8068027532134232e-03 -1.6422447187074099e-03 -1.4844203989406979e-03 -1.3337368091610523e-03 -1.1905607826032351e-03
 -1.0552163691421648e-03 -9.2798221932518014e-04 -8.0908895378340882e-04 -6.9871651802225839e-04 -5.9699152259098985e-04
 -5.0398456863143032e-04 -4.1970755880576242e-04 -3.4411099360345267e-04 -2.7708125302726758e-04 -2.1843786365840495e-04
 -1.6793075110072759e-04 -1.2523747780411661e-04 -8.9960466266923196e-05 -6.1624207617531530e-05 -3.9672455575032535e-05
 -2.3465405789001921e-05 -1.2276860558387829e-05 -5.2913789295094496e-06 -1.6014121731681253e-06 -2.0442464083484893e-07
  0.0000000000000000e+00
