# Supplementary material
Source: publisher figshare collection journal article supplement (https://rs.figshare.com/ndownloader/files/37464464)
Supplement: Supplementary file 2 [file 37464464 › Ordered_Nanoporous_Metals_SI/ONMs_EAM_Potential_files/EAM_Pt.Johnson.lammps.eam]

#-> LAMMPS Potential File in DYNAMO 86 setfl Format <-#
# EAM_Pt_parameter
# Implemented 
2 Pt1 Pt2
1001 0.30564108041232485036 1001 0.01200000000000000025 12.00000000000000000000
78 195.08400000000000318323 3.91999999999999992895 FCC
-0.00000149401611798452
-1.71971407833436473744
-2.88115728565916917603
-3.86436002753691010270
-4.73977500733698597912
-5.53918196455821210122
-6.28060361639403552658
-6.97558742798714703781
-7.63212709642438014157
-8.25606216179900087582
-8.85183143754217560684
-9.42291386070012570997
-9.97210320093888924475
-10.50168789985063000358
-11.01357358377493866897
-11.50936930861470841592
-11.99044996942431140496
-12.45800253476330787805
-12.91306099869106027711
-13.35653327408160251366
-13.78922220906995121936
-14.21184223851962258323
-14.62503274024351895832
-15.02936886704737062814
-15.42537041971685241037
-15.81350918139493444414
-16.19421503044614851774
-16.56788107394302755893
-16.93486798877879095926
-17.29550771634416861389
-17.65010662575722122369
-17.99894823705707835870
-18.34229557763017481875
-18.68039323104730797809
-19.01346912645180964319
-19.34173610792210595832
-19.66539331629612519237
-19.98462741038659373771
-20.29961365003285322928
-20.61051685979522929415
-20.91749228912605573782
-21.22068638241148974544
-21.52023747026396804927
-21.81627639177429145434
-22.10892705603961871930
-22.39830695011771055647
-22.68452759957718711803
-22.96769498698580136420
-23.24790993297723673550
-23.52526844393977256686
-23.79986202986092536094
-24.07177799542530038934
-24.34109970708794534744
-24.60790683852178162283
-24.87227559655831043983
-25.13427892949789210775
-25.39398671945525265414
-25.65146596022173497431
-25.90678092196528581326
-26.15999330394801347666
-26.41116237631772278860
-26.66034511192072642416
-26.90759630898691057155
-27.15296870545372698302
-27.39651308561954579091
-27.63827837975080825572
-27.87831175720729248724
-28.11665871359744173219
-28.35336315242767213363
-28.58846746166804209111
-28.82201258561797629909
-29.05403809242259427492
-29.28458223755863087945
-29.51368202358238690408
-29.74137325640662510295
-29.96769059835135351477
-30.19266761819286415403
-30.41633683841751079058
-30.63872977986953216600
-30.85987700396752941856
-31.07980815265054985730
-31.29855198620182221703
-31.51613641908718932427
-31.73258855393499899833
-31.94793471377415983170
-32.16220047263923476066
-32.37541068464267368654
-32.58758951160777428413
-32.79876044934877654669
-33.00894635267855647953
-33.21816945921875685599
-33.42645141208227244078
-33.63381328149260696136
-33.84027558540093139072
-34.04585830915712563183
-34.25058092428783140804
-34.45446240643030932915
-34.65752125246880410714
-34.85977549691595811510
-35.06124272758005133710
-35.26194010055584726615
-35.46188435457436582965
-35.66109182474507122151
-35.85957845572171720505
-36.05735981432115977441
-36.25445110162279860333
-36.45086716457456788021
-36.64662250713012525694
-36.84173130093987680311
-37.03620739561812769125
-37.23006432860607617386
-37.42331533465070236844
-37.61597335491705251798
-37.80805104575183150928
-37.99956078711385032420
-38.19051469068728010825
-38.38092460769180291891
-38.57080213640367105654
-38.76015862940064238273
-38.94900520054292769601
-39.13735273170208728288
-39.32521187924879768616
-39.51259308030994787941
-39.69950655880523271435
-39.88596233127238122051
-40.07197021249027102385
-40.25753982090839144803
-40.44268058389057785007
-40.62740174278104632322
-40.81171235779977735092
-40.99562131277431120679
-41.17913731971469815107
-41.36226892323774251281
-41.54502450484687869903
-41.72741228707269556253
-41.90944033748082375723
-42.09111657255095195751
-42.27244876143316076877
-42.45344452958561021205
-42.63411136229824904831
-42.81445660810717157574
-42.99448748210355120136
-43.17421106914076034400
-43.35363432694427388014
-43.53276408912702066800
-43.71160706811461693633
-43.89016985798279790743
-44.06845893721088458506
-44.24648067135419893248
-44.42424131563839750925
-44.60174701747773440275
-44.77900381892142434026
-44.95601765902895863292
-45.13279437617822509310
-45.30933971030798090851
-45.48565930509700194762
-45.66175871008246645033
-45.83764338271926419566
-46.01331869038226329849
-46.18878991231380837235
-46.36406224151762955898
-46.53914078660169195700
-46.71403057357099442015
-46.88873654757229303414
-47.06326357459256826132
-47.23761644311200313950
-47.41179986571378890403
-47.58581848065119856983
-47.75967685337447221627
-47.93337947801749976406
-48.10693077884667445687
-48.28033511167225810823
-48.45359676522399183796
-48.62671996249167705173
-48.79970886203219038180
-48.97256755924354365561
-49.14530008760725365846
-49.31791041989988855221
-49.49040246937482834255
-49.66278009091479361814
-49.83504708215659206871
-50.00720718458842384280
-50.17926408462049892023
-50.35122141463037337417
-50.52308275398281978141
-50.69485163002593708370
-50.86653151906325831533
-51.03812584730343360206
-51.20963799178738895534
-51.38107128129392719984
-51.55242899722462368572
-51.72371437446774677937
-51.89493060224305054362
-52.06608082492694222765
-52.23716814285877774182
-52.40819561312920882301
-52.57916625035068136640
-52.75008302741082388820
-52.92094887620859822164
-53.09176668837490353781
-53.26253931597663893172
-53.43326957220540407434
-53.60396023205170479287
-53.77461403296361197590
-53.94523367549182069070
-54.11582182392078266275
-54.28638110688594053954
-54.45691411797793080041
-54.62742341633426690350
-54.79791152721799107894
-54.96838094258460216679
-55.13883412163676212003
-55.30927349136766224547
-55.47970144709287865226
-55.65012035297158377034
-55.82053254251660234786
-55.99094031909420721149
-56.16134595641391058507
-56.33175169900789569510
-56.50215976270106921220
-56.67257233507166347408
-56.84299157590224638170
-57.01341961762200583053
-57.18385856574039394218
-57.35431049927173319247
-57.52477747115192130423
-57.69526150864635383186
-57.86576461375082658378
-58.03628876358351362796
-58.20683591077019514159
-58.37740798382159823632
-58.54800688750358972356
-58.71863450320043398278
-58.88929268927097382402
-59.05998328139781960999
-59.23070809293059824086
-59.40146891522189775969
-59.57226751795741392925
-59.74310564948004298458
-59.91398503710755107932
-60.08490738744447412500
-60.25587438668827644506
-60.42688770093013772566
-60.59794897644968614259
-60.76905984000478611051
-60.94022189911601117274
-61.11143674234565992265
-61.28270593957205392144
-61.45403104225871970812
-61.62541358371896649260
-61.79685507937540478451
-61.96835702701514492219
-62.13992090704027759784
-62.31154818271409112640
-62.48324030040291177102
-62.65499868981356712538
-62.82682476422689887841
-62.99871992072715443101
-63.17068554042731420850
-63.34272298869058204218
-63.51483361534818072869
-63.68701875491331065859
-63.85927972679112940568
-64.03161783548611651895
-64.20403437080466346742
-64.37653060805524773969
-64.54910780824462790406
-64.72176721827113965446
-64.89451007111452440768
-65.06733758602260309090
-65.24025096869496564977
-65.41325141146364785527
-65.58634009347048277050
-65.75951818084212163740
-65.93278682686155889314
-66.10614717213749713665
-66.27960034477024464650
-66.45314746051559495754
-66.62678962294563689284
-66.80052792360709190689
-66.97436344217706505333
-67.14829724661669274610
-67.32233039332143675892
-67.49646392727012766954
-67.67069888217048401202
-67.84503628060363666918
-68.01947713416524265995
-68.19402244360449572014
-68.36867319896200001494
-68.54343037970440377649
-68.71829495485704342173
-68.89326788313545080200
-69.06835011307362037769
-69.24354258315099741594
-69.41884622191759035559
-69.59426194811672417018
-69.76979067080620211527
-69.94543328947781901661
-70.12119069417454397808
-70.29706376560636726936
-70.47305337526407242876
-70.64916038553189991944
-70.82538564979753914486
-71.00173001256158045180
-71.17819430954446602300
-71.35477936779244600984
-71.53148600578145988038
-71.70831503351988089889
-71.88526725264958372463
-72.06234345654593198560
-72.23954443041506578993
-72.41687095139167240632
-72.59432378863348844789
-72.77190370341588732117
-72.94961144922396556467
-73.12744777184420286176
-73.30541340945399042539
-73.48350909271064779205
-73.66173554483899010847
-73.84009348171687747708
-74.01858361196067903620
-74.19720663700863383383
-74.37596325120401274944
-74.55485414187563719679
-74.73387998941876730896
-74.91304146737419955571
-75.09233924250602854045
-75.27177397487861298941
-75.45134631793277435463
-75.63105691856040380117
-75.81090641717784706088
-75.99089544779963034671
-76.17102463810945778278
-76.35129460953126567802
-76.53170597729902624451
-76.71225935052581235141
-76.89295533227141277166
-77.07379451960963478996
-77.25477750369444152057
-77.43590486982495235679
-77.61717719750984656457
-77.79859506053128370695
-77.98015902700711876605
-78.16186965945280462620
-78.34372751484221453211
-78.52573314466852139049
-78.70788709500288859999
-78.89018990655316088123
-79.07264211472218562449
-79.25524424966445735663
-79.43799683634250641262
-79.62090039458286128138
-79.80395543913027722738
-79.98716247970261861155
-80.17052202104389380111
-80.35403456297717639245
-80.53770060045673062632
-80.72152062361936941670
-80.90549511783513025875
-81.08962456375792271501
-81.27390943737430006877
-81.45835021005262888139
-81.64294734859174695885
-81.82770131526768864205
-82.01261256788177433918
-82.19768155980619894763
-82.38290874003024555350
-82.56829455320558963649
-82.75383943969092115367
-82.93954383559628240619
-83.12540817282632588103
-83.31143287912374262305
-83.49761837811166742540
-83.68396508933568611610
-83.87047342830533125380
-84.05714380653506623275
-84.24397663158487148394
-84.43097230710020539846
-84.61813123285116944317
-84.80545380477201433678
-84.99294041499962304442
-85.18059145191136849462
-85.36840730016280076597
-85.55638834072482268311
-85.74453495092086541263
-85.93284750446201769591
-86.12132637148431513197
-86.30997191858318728919
-86.49878450884898484219
-86.68776450190091509285
-86.87691225392188698606
-87.06622811769227610057
-87.25571244262255277135
-87.44536557478704708046
-87.63518785695640644917
-87.82517962862937110913
-88.01534122606534538136
-88.20567298231480890536
-88.39617522725143317075
-88.58684828760266327663
-88.77769248697927650937
-88.96870814590636200592
-89.15989558185253827105
-89.35125510925956859865
-89.54278703957095331134
-89.73449168126091990416
-89.92636933986278791053
-90.11842031799682217752
-90.31064491539819982791
-90.50304342894395404073
-90.69561615268042942262
-90.88836337785005525802
-91.08128539291749348195
-91.27438248359624139994
-91.46765493287404069633
-91.66110302103908225035
-91.85472702570467617988
-92.04852722183454716287
-92.24250388176773185478
-92.43665727524279418503
-92.63098766942198381003
-92.82549532891562193981
-93.02018051580517976618
-93.21504348966692532485
-93.41008450759534298413
-93.60530382422552975186
-93.80070169175598948641
-93.99627835997119973399
-94.19203407626412172249
-94.38796908565706189620
-94.58408363082389769261
-94.78037795211207594548
-94.97685228756284914198
-95.17350687293298960867
-95.37034194171502576864
-95.56735772515787630255
-95.76455445228782537015
-95.96193234992733778199
-96.15949164271597737752
-96.35723255312979063092
-96.55515530150063341353
-96.75326010603549775624
-96.95154718283544070800
-97.15001674591457003771
-97.34866900721874571900
-97.54750417664359929404
-97.74652246205363326226
-97.94572406929904673234
-98.14510920223494849779
-98.34467806273801215866
-98.54443085072438179850
-98.74436776416723660077
-98.94448899911310491007
-99.14479474970005412615
-99.34528520817320895731
-99.54596056490225919333
-99.74682100839743270626
-99.94786672532592319840
-100.14909790052792004644
-100.35051471703292236270
-100.55211735607468881426
-100.75390599710749484075
-100.95588081782182143797
-101.15804199415862285605
-101.36038970032575434743
-101.56292410881167143089
-101.76564539040128920533
-101.96855371419047742165
-102.17164924759987343350
-102.37493215639011623352
-102.57840260467571624758
-102.78206075493898197237
-102.98590676804479926432
-103.18994080325313689173
-103.39416301823405319738
-103.59857356908014480723
-103.80317261032092801543
-104.00796029493528749299
-104.21293677436506186496
-104.41810219852834507037
-104.62345671583136663685
-104.82900047318247516159
-105.03473361600401858595
-105.24065628824484974757
-105.44676863239317299303
-105.65307078948842445243
-105.85956289913343653097
-106.06624509950688661775
-106.27311752737460892604
-106.48018031810181582841
-106.68743360566475075757
-106.89487752266177267302
-107.10251220032580476982
-107.31033776853439576371
-107.51835435582239597352
-107.72656208939133648528
-107.93496109512261682539
-108.14355149758637253399
-108.35233342005352596971
-108.56130698450618865536
-108.77047231164794993674
-108.97982952091501829273
-109.18937873048599840331
-109.39912005729257771236
-109.60905361702970139959
-109.81917952416557682227
-110.02949789195139373987
-110.24000883243229509389
-110.45071245645601720753
-110.66160887368306475764
-110.87269819259671521650
-111.08398052051188642508
-111.29545596358559578221
-111.50712462682508885337
-111.71898661409835540326
-111.93104202814220116124
-112.14329097057208173283
-112.35573354189153860716
-112.56836984149998670546
-112.78119996770237776218
-112.99422401771772683787
-113.20744208768820726618
-113.42085427268727926275
-113.63446066672815959464
-113.84826136277303021416
-114.06225645274111002436
-114.27644602751581714983
-114.49083017695545549941
-114.70540898989855804757
-114.92018255417457339718
-115.13515095660977749503
-115.35031428303642542232
-115.56567261830088000352
-115.78122604626975089559
-115.99697464983961481266
-116.21291851094349567575
-116.42905771055882269138
-116.64539232871453577900
-116.86192244449955524033
-117.07864813606897769205
-117.29556948065203414444
-117.51268655455959333267
-117.72999943319041449286
-117.94750819103961703149
-118.16521290170425118049
-118.38311363789165397975
-118.60121047142553152298
-118.81950347325312122848
-119.03799271345206989281
-119.25667826123714121422
-119.47556018496680962926
-119.69463855215008152300
-119.91391342945314590906
-120.13338488270534298863
-120.35305297690632642116
-120.57291777623231610050
-120.79297934404195302704
-121.01323774288346157846
-121.23369303449987910426
-121.45434527983593397948
-121.67519453904469628469
-121.89624087149195474922
-122.11748433576417482982
-122.33892498967287565392
-122.56056289026201966408
-122.78239809381267377830
-123.00443065584909163590
-123.22666063114559165115
-123.44908807373064973945
-123.67171303689366368417
-123.89453557319001220094
-124.11755573444730771371
-124.34077357177017120193
-124.56418913554631444640
-124.78780247545171278034
-125.01161364045532309319
-125.23562267882647347506
-125.45982963813776223105
-125.68423456527187909160
-125.90883750642581162538
-126.13363850711692748519
-126.35863761218780609852
-126.58383486581124088843
-126.80923031149495727732
-127.03482399208689912484
-127.26061594978051516591
-127.48660622611907911050
-127.71279486200097608162
-127.93918189768464799272
-128.16576737279262943048
-128.39255132631751621375
-128.61953379662531915528
-128.84671482146120524703
-129.07409443795359038631
-129.30167268261914159666
-129.52944959136658553689
-129.75742519950233599957
-129.98559954173401820299
-130.21397265217524363834
-130.44254456435032807349
-130.67131531119832743570
-130.90028492507690316415
-131.12945343776823392545
-131.35882088048163041094
-131.58838728385808281018
-131.81815267797514934500
-132.04811709235104899562
-132.27828055594738998479
-132.50864309717553624068
-132.73920474389888113365
-132.96996552343750863656
-133.20092546257205867732
-133.43208458754850198602
-133.66344292408064120536
-133.89500049735511311155
-134.12675733203468553256
-134.35871345226235007431
-134.59086888166530115996
-134.82322364335857400874
-135.05577775994856892794
-135.28853125353680297849
-135.52148414572423007485
-135.75463645761374209542
-135.98798820981528479024
-136.22153942244790414406
-136.45529011514440753672
-136.68924030705466066138
-136.92339001684899812972
-137.15773926272152039019
-137.39228806239407276735
-137.62703643311931500648
-137.86198439168356344453
-138.09713195441213429149
-138.33247913717002575140
-138.56802595536748867744
-138.80377242396207293496
-139.03971855746237906715
-139.27586436993078677915
-139.51220987498777503788
-139.74875508581419580878
-139.98550001515411622677
-140.22244467531970713026
-140.45958907819226624270
-140.69693323522631089872
-140.93447715745310233615
-141.17222085548291943269
-141.41016433950835562428
-141.64830761930738844967
-141.88665070424667646876
-142.12519360328326456511
-142.36393632496969985368
-142.60287887745437274134
-142.84202126848674652138
-143.08136350541849424189
-143.32090559520759143197
-143.56064754442013509106
-143.80058935923398166778
-144.04073104544079342304
-144.28107260844956272194
-144.52161405328865839692
-144.76235538460923635284
-145.00329660668728593009
-145.24443772342624470184
-145.48577873836052276602
-145.72731965465766279522
-145.96906047512038639979
-146.21100120219034579350
-146.45314183794948803552
-146.69548238412369300931
-146.93802284208436503832
-147.18076321285172980424
-147.42370349709710808384
-147.66684369514496211195
-147.91018380697619249986
-148.15372383222938879044
-148.39746377020446743700
-148.64140361986528660054
-148.88554337983964614978
-149.12988304842497200298
-149.37442262358786138066
-149.61916210296851659223
-149.86410148388176821754
-150.10924076331968990416
-150.35457993795421316463
-150.60011900413928742637
-150.84585795791258533427
-151.09179679499845860846
-151.33793551080998440739
-151.58427410045032956987
-151.83081255871684334124
-152.07755088010117106023
-152.32448905879243739037
-152.57162708867929268308
-152.81896496335241408815
-153.06650267610530136153
-153.31424021993814221787
-153.56217758755849445151
-153.81031477138367336011
-154.05865176354382128920
-154.30718855588213500596
-154.55592513995838999108
-154.80486150705041836773
-155.05399764815581420407
-155.30333355399432093691
-155.55286921500953667419
-155.80260462137107424496
-156.05253976297683493613
-156.30267462945369061345
-156.55300921016032589250
-156.80354349418962556229
-157.05427747036901564570
-157.30521112726398769155
-157.55634445317878089554
-157.80767743615842846339
-158.05921006399159978173
-158.31094232421025935764
-158.56287420409444166580
-158.81500569067054584593
-159.06733677071611054998
-159.31986743076038237632
-159.57259765708579379861
-159.82552743573012321576
-160.07865675248740444658
-160.33198559291156470863
-160.58551394231562881032
-160.83924178577558450343
-161.09316910813049616991
-161.34729589398523330601
-161.60162212771115264331
-161.85614779344837188546
-162.11087287510792975809
-162.36579735637201338250
-162.62092122069623201241
-162.87624445131189077074
-163.13176703122644539690
-163.38748894322577598359
-163.64341016987543753203
-163.89953069352259262814
-164.15585049629669356364
-164.41236956011221082008
-164.66908786666920150310
-164.92600539745501464495
-165.18312213374622388073
-165.44043805660953694314
-165.69795314690350096498
-165.95566738528054884227
-166.21358075218699923425
-166.47169322786601242115
-166.73000479235804505151
-166.98851542550312387903
-167.24722510694107313611
-167.50613381611435670493
-167.76524153226796443050
-168.02454823445202691801
-168.28405390152249765379
-168.54375851214331305528
-168.80366204478616509732
-169.06376447773322979629
-169.32406578907898619946
-169.58456595672942057718
-169.84526495840532334114
-170.10616277164274379174
-170.36725937379424067331
-170.62855474203036010294
-170.89004885334134087316
-171.15174168453779657284
-171.41363321225162508199
-171.67572341293839599530
-171.93801226287780536950
-172.20049973817492627859
-172.46318581476157305588
-172.72607046839846134390
-172.98915367467373016552
-173.25243540900794414483
-173.51591564665193345718
-173.77959436268952231330
-174.04347153203900688823
-174.30754712945372375543
-174.57182112952284569474
-174.83629350667331436853
-175.10096423517086350330
-175.36583328912115575804
-175.63090064247012378473
-175.89616626900624396512
-176.16163014236065009754
-176.42729223600974819419
-176.69315252327396592591
-176.95921097732116322732
-177.22546757116640492313
-177.49192227767366603075
-177.75857506955571807339
-178.02542591937753968523
-178.29247479955461130885
-178.55972168235621211352
-178.82716653990485156100
-179.09480934417865682917
-179.36265006701125912514
-179.63068868009372636152
-179.89892515497467684327
-180.16735946306221194391
-180.43599157562448453973
-180.70482146379015375715
-180.97384909855065870943
-181.24307445076010480989
-181.51249749113640064024
-181.78211819026296325319
-182.05193651858871817240
-182.32195244642969100823
-182.59216594396980326565
-182.86257698126155446516
-183.13318552822738638497
-183.40399155466059255559
-183.67499503022520457307
-183.94619592445928901725
-184.21759420677301477554
-184.48918984645115415333
-184.76098281265433342924
-185.03297307441880548140
-185.30516060065804140322
-185.57754536016375368490
-185.85012732160544146609
-186.12290645353323270683
-186.39588272437777050072
-186.66905610245044044859
-186.94242655594598545576
-187.21599405294102780317
-187.48975856139691131830
-187.76372004915970137517
-188.03787848396109438909
-188.31223383341898625076
-188.58678606503872288158
-188.86153514621412341512
-189.13648104422748019715
-189.41162372625092302769
-189.68696315934721496888
-189.96249931047020709229
-190.23823214646620272106
-190.51416163407452586398
-190.79028773992774858925
-191.06661043055282789283
-191.34312967237258362729
-191.61984543170581218874
-191.89675767476740020356
-192.17386636767002983106
-192.45117147642508825811
-192.72867296694266769919
-193.00637080503270226473
-193.28426495640576376900
-193.56235538667317541695
-193.84064206134871710674
-194.11912494584862542979
-194.39780400549273053912
-194.67667920550502458354
-194.95575051101423014188
-195.23501788705448234396
-195.51448129856635205215
-195.79414071039707323507
-196.07399608730224827013
-196.35404739394471107516
-196.63429459489714190568
-196.91473765464172629436
-197.19537653757072348526
-197.47621120798783067585
-197.75724163010818301700
-198.03846776805880836037
-198.31988958588101468195
-198.60150704752879846637
-198.88332011686998157529
-199.16532875768928079196
-199.44753293368444246880
-199.72993260847192686924
-200.01252774558292912843
-200.29531830846769935306
-200.57830426049395100563
-200.86148556494845252018
-201.14486218503668624180
-201.42843408388466741599
-201.71220122453894418868
-201.99616356996705235360
-202.28032108305865222064
-202.56467372662496018165
-202.84922146340136350773
-203.13396425604605610715
-203.41890206714151645429
-203.70403485919484865008
-203.98936259463891929045
-204.27488523583178903209
-204.56060274505887264240
-204.84651508453157475742
-205.13262221639001836593
-205.41892410270145319373
-205.70542070546264312725
-205.99211198659929777932
-206.27899790796641354973
-206.56607843135009261459
-206.85335351846777030005
-207.14082313096673715336
-207.42848723042766323488
-207.71634577836300650233
-208.00439873621917286073
-208.29264606537481085979
-208.58108772714399492543
-208.86972368277452005714
-209.15855389344937975693
-209.44757832028778921085
-209.73679692434529897582
-210.02620966661265811126
-210.31581650801911109738
-210.60561740943114727997
-210.89561233165397879930
-211.18580123543029003486
-211.47618408144342083688
-211.76676083031497910270
-212.05753144260791032139
-212.34849587882467858435
-212.63965409940954032209
-212.93100606474774849630
-213.22255173516782633669
-213.51429107093952097784
-213.80622403227619088284
-214.09835057933378266171
-214.39067067221412798972
-214.68318427096119194175
-214.97589133556562046579
-215.26879182596144346462
-215.56188570203028120886
-215.85517292359850216599
-216.14865345044063360547
-216.44232724227651942783
-216.73619425877450339613
-217.03025445955165650957
-217.32450780417116220633
-217.61895425214720489748
-217.91359376294235516980
-218.20842629596882034093
-218.50345181058889920678
-218.79867026611555047566
-219.09408162181284751568
-219.38968583689563729422
-219.68548287053135936731
-219.98147268183856795076
-220.27765522988920565695
-220.57403047370814874739
-220.87059837227366188017
-221.16735888451762548357
-221.46431196932553575607
-221.76145758553923315048
-222.05879569195349176880
-222.35632624731999840151
-222.65404921034519247769
-222.95196453969242611493
-223.25007219398128199828
-223.54837213178780075395
-223.84686431164629993873
-224.14554869204800979787
-224.44442523144289225456
-224.74349388823759454681
-225.04275462080045144830
-225.34220738745682410809
-225.64185214649148747412
-225.94168885615101771691
-226.24171747464015425066
-226.54193796012543771212
-226.84235027073418677901
-227.14295436455483923055
-227.44375019963752038166
-227.74473773399483889079
-228.04591692560097726528
-228.34728773239351085067
-228.64885011227318045712
-228.95060402310321023833
-229.25254942271214986249
-229.55468626889137340186
-229.85701451939678463532
-230.15953413194938548259
-230.46224506423516231735
-230.76514727390622283565
-231.06824071857920444018
-231.37152535583777535066
-231.67500114323081561452
-231.97866803827605508559
-232.28252599845632175857
-232.58657498122227025306
-232.89081494399295024778
-233.19524584415478329902
-233.49986763906315445638
-233.80468028603991115233
-234.10968374237984335196
-234.41487796534261178749
-234.72026291216104709747
-235.02583854003489705065
-235.33160480613639720104
-235.63756166760686028283
-235.94370908155838151288
-236.25004700507554389333
-236.55657539521189391962
-236.86329420899483011453
-237.17020340342207873618
-237.47730293546487700951
-237.78459276206615413685
-238.09207284014132710581
305.64108041232486812078
296.91591274501308816980
288.43982334532137201677
280.20570175007452462523
272.20664047922696227033
264.43592924128427057440
256.88704930414036198272
249.55366802661072256342
242.42963354607724113521
235.50896961778292393319
228.78587060144994325128
222.25469659101725028449
215.90996868340710079792
209.74636438235759783311
203.75871313346044644277
197.94199198666041183969
192.29132138257983797303
186.80196105912941106908
181.46930607497344567491
176.28888294651557089310
171.25634589515973971174
166.36747320170277930629
161.61816366479905582310
157.00443316052215436684
152.52241130014687087169
148.16833818333543604240
143.93856124401645502076
139.82953218630137826040
135.83780400787262010454
131.96002810834610841084
128.19295148018071017759
124.53341397977905558037
120.97834567649184123184
117.52476427729830277258
114.16977262500662959610
110.91055626787235155462
107.74438109859687529024
104.66859106072695340117
101.68060592052881929703
98.77791910246874351742
95.95809558648549852933
93.21876986528812381039
90.55764395996817484047
87.97248549225983538236
85.46112581183125200823
83.02145817703706143220
80.65143598760448639950
78.34907106777102114847
76.11243199843450213393
73.93964249691420320687
71.82887984296608863133
69.77837334973030181118
67.78640287832851640815
65.85129739486571054385
63.97143356862514451677
62.14523441028040195988
60.37116794898338412168
58.64774594721671974185
56.97352265233416801493
55.34709358374048093765
53.76709435469349784853
52.23219952774162777587
50.74112150283329469858
49.29260943716987242169
47.88544819589161249951
46.51845733272007521464
45.19049009969913299756
43.90043248520583318850
42.64720227942268593324
41.42974816648816727138
40.24704884256399139986
39.09811215907846815298
37.98197429042838280111
36.89769892543998253132
35.84437648191193659386
34.82112334358048144622
33.82708111886702084803
32.86141592078663364873
31.92331766741264686971
31.01199940231136764623
30.12669663437615952262
29.26666669650731833485
28.43118812260005867643
27.61956004231741346189
26.83110159314065157332
26.06515134920417509079
25.32106676643517673142
24.59822364353329859910
23.89601559833753086082
23.21385355914133796773
22.55116527052943453668
21.90739481332131077806
21.28200213821897790467
20.67446261276792540684
20.08426658125076613715
19.51091893714481884103
18.95393870778472944494
18.41285865088180528915
17.88722486256144605932
17.37659639659013777191
16.88054489447228334598
16.39865422610674983162
15.93052014070163835413
15.47574992765436796560
15.03396208711273018821
14.60478600994040832006
14.18786166681862326300
13.78283930622292530188
13.38937916102195657686
13.00715116345197408521
12.63583466822794854068
12.27511818355910477862
11.92469910984317138514
11.58428348582016731427
11.25358574197271543937
10.93232846096611687869
10.62024214492713447555
10.31706498936632421248
10.02254266355418366174
9.73642809716695367683
9.45848127302307872810
9.18846902573640988976
8.92616484611730420795
8.67134869115746731438
8.42380679943922316966
8.18333151181428597454
7.94972109720165232005
7.72277958335842917847
7.50231659248170235088
7.28814718150346418923
7.08009168694468904448
6.87797557419833971437
6.68162929111493397727
6.49088812576780949115
6.30559206827878959700
6.12558567658830277480
5.95071794605739778916
5.78084218279223271963
5.61581588058479663772
5.45550060136659542565
5.29976185907505037420
5.14846900683518615693
5.00149512736193102569
4.85871692649114095275
4.72001462974997121336
4.58527188187990208945
4.45437564922805506740
4.32721612492499030367
4.20368663676936638041
4.08368355774225566535
3.96710621907600646807
3.85385682580472721526
3.74384037472557862358
3.63696457470201695017
3.53313976924216399667
3.43227886128732340154
3.33429724014757988826
3.23911271052317051300
3.14664542355209553293
3.05681780982610851183
2.96955451431891859215
2.88478233317199350694
2.80243015228495684354
2.72242888765904211823
2.64471142744357035070
2.56921257563683358427
2.49586899739415635224
2.42461916589725268167
2.35540331074030806491
2.28816336778949080966
2.22284293047382908171
2.15938720246658988344
2.09774295171747215960
2.03785846579704221782
1.97968350851596208706
1.92316927778260637893
1.86826836466373058521
1.81493471361382918694
1.76312358383983935894
1.71279151176876376361
1.66389627458673849958
1.61639685481895134522
1.57025340592070450363
1.52542721885075027721
1.48188068959886187770
1.43957728764039716296
1.39848152529139713174
1.35855892793850019373
1.31977600511871528965
1.28210022242477461596
1.24549997421251568142
1.20994455708738146704
1.17540414414780869379
1.14184975996389193043
1.10925325627032900222
1.07758728835327532991
1.04682529211126995605
1.01694146177101685247
0.98791072823930914382
0.95970873807294854174
0.93231183304900866471
0.90569703031831050311
0.87984200312545701728
0.85472506207925702526
0.83032513695782228513
0.80662175903307720137
0.78359504389985235040
0.76122567479515790279
0.73949488639364380216
0.71838444906565113168
0.69787665358465278409
0.67795429627125058936
0.65860066456126842294
0.63979952298583642190
0.62153509955170005430
0.60379207251033473192
0.58655555750476218169
0.56981109508328886548
0.55354463856969038371
0.53774254227966766795
0.52239155007368842654
0.50747878423661241243
0.49299173467477114263
0.47891824842143931873
0.46524651944189504560
0.45196507872951574569
0.43906278468460230302
0.42652881376785911627
0.41435265142069133137
0.40252408324470018153
0.39103318643297885204
0.37987032144602006500
0.36902612392525202534
0.35849149683741954320
0.34825760284322077043
0.33831585688379711696
0.32865791897885565653
0.31927568723038846077
0.31016129102611089685
0.30130708443692483245
0.29270563980286418149
0.28434974150214348265
0.27623237989808152593
0.26834674545882375440
0.26068622304492872210
0.25324438636002749581
0.24601499255990122439
0.23899197701545324413
0.23216944822518362224
0.22554168287289777517
0.21910312102650283950
0.21284836147386484995
0.20677215719181374354
0.20086941094449478618
0.19513517100737465260
0.18956462701331450171
0.18415310591722588995
0.17889606807592378646
0.17378910343988873688
0.16882792785374295397
0.16400837946233715048
0.15932641521943327612
0.15477810749605416807
0.15035964078565494662
0.14606730850335244987
0.14189750987652710590
0.13784674692418930064
0.13391162152257601869
0.13008883255451628158
0.12637517314017385206
0.12276752794684424319
0.11926287057554925408
0.11585826102223663325
0.11255084321145517046
0.10933784260043626080
0.10621656385157177138
0.10318438857133632736
0.10023877311375638255
0.09737724644658438122
0.09459740807838659671
0.09189692604480793892
0.08927353495232186187
0.08672503407782609919
0.08424928552248935054
0.08184421241830032445
0.07950779718581456323
0.07723807984163751084
0.07503315635422422303
0.07289117704661593478
0.07081034504477422276
0.06878891477021040202
0.06682519047564625114
0.06491752482247721556
0.06306431749884494620
0.06126401387715996877
0.05951510370994807231
0.05781611986292651412
0.05616563708424734264
0.05456227080887512265
0.05300467599709629551
0.05149154600618567612
0.05002161149428371173
0.04859363935556475916
0.04720643168580318516
0.04585882477746977548
0.04454968814351494694
0.04327792356902042392
0.04204246418992321072
0.04084227359803953294
0.03967634497163765456
0.03854370023083047297
0.03744338921707891787
0.03637448889611846758
0.03533610258363958923
0.03432735919307292050
0.03334741250484780928
0.03239544045651161081
0.03147064445311386488
0.03057224869727716288
0.02969949953839235227
0.02885166484039254284
0.02802803336757511699
0.02722791418795698221
0.02645063609366215054
0.02569554703785554423
0.02496201358775081494
0.02424942039323315160
0.02355716967065142609
0.02288468070134643331
0.02223138934449487431
0.02159674756386010738
0.02098022296805289108
0.02038129836391623997
0.01979947132265994988
0.01923425375838066012
0.01868517151861400286
0.01815176398657529153
0.01763358369475492501
0.01713019594954492270
0.01664117846658073191
0.01616612101649354122
0.01570462508077481723
0.01525630351746541657
0.01482078023638781251
0.01439768988364981822
0.01398667753515487472
0.01358739839886133859
0.01319951752554190602
0.01282270952779955044
0.01245665830710515447
0.01210105678862704974
0.01175560666363078578
0.01142001813923223565
0.01109400969529492076
0.01077730784826685592
0.01046964692175951159
0.01017076882367572155
0.00988042282970030480
0.00959836537297107176
0.00932435983975442480
0.00905817637095351902
0.00879959166928308625
0.00854838881194858700
0.00830435706867310199
0.00806729172491874209
0.00783699391015485469
0.00761327043102842400
0.00739593360929721114
0.00718480112438918666
0.00697969586045668351
0.00678044575779648481
0.00658688366851164445
0.00639884721629353000
0.00621617866020691447
0.00603872476236339256
0.00586633665937249821
0.00569886973746241022
0.00553618351116571140
0.00537814150546815986
0.00522461114132197636
0.00507546362442717718
0.00493057383718808161
0.00478982023375397557
0.00465308473805618999
0.00452025264475583183
0.00439121252301926269
0.00426585612304039401
0.00414407828523159424
0.00402577685200693463
0.00391085258208366711
0.00379920906723028168
0.00369075265139102993
0.00358539235211935252
0.00348303978425400533
0.00338360908577415480
0.00328701684577097000
0.00319318203447551329
0.00310202593528406201
0.00301347207872397754
0.00292744617830457011
0.00284387606819934587
0.00276269164270712521
0.00268382479744148916
0.00260720937219899133
0.00253278109545839640
0.00246047753046425106
0.00239023802284966036
0.00232200364975421918
0.00225571717039456214
0.00219132297804588809
0.00212876705339436548
0.00206799691922111058
0.00200896159637986614
0.00195161156103134900
0.00189589870309847465
0.00184177628590750627
0.00178919890698140695
0.00173812245995234741
0.00168850409756157900
0.00164030219571548804
0.00159347631856778947
0.00154798718459849731
0.00150379663366126556
0.00146086759497139553
0.00141916405600774520
0.00137865103230233881
0.00133929453809245470
0.00130106155781046281
0.00126392001838756683
0.00122783876234820928
0.00119278752167250950
0.00115873689240490567
0.00112565830998760186
0.00109352402529820452
0.00106230708137139461
0.00103198129078515004
0.00100252121369249375
0.00097390213648041466
0.00094610005103796754
0.00091909163461625411
0.00089285423026330398
0.00086736582781751228
0.00084260504544363948
0.00081855111169592339
0.00079518384809321369
0.00077248365219156521
0.00075043148114002818
0.00072900883570590407
0.00070819774475600625
0.00068798075018095678
0.00066834089224983653
0.00064926169538293119
0.00063072715433060513
0.00061272172074675350
0.00059523029014551566
0.00057823818923036382
0.00056173116358488586
0.00054569536571497806
0.00053011734343238678
0.00051498402856987716
0.00050028272601853685
0.00048600110307805142
0.00047212717911097819
0.00045864931549238026
0.00044555620584635266
0.00043283686656127941
0.00042048062757584447
0.00040847712342808299
0.00039681628455994600
0.00038548832887010765
0.00037448375350790164
0.00036379332690152734
0.00035340808101382536
0.00034331930381912082
0.00033351853199484449
0.00032399754382177187
0.00031474835228695439
0.00030576319838352924
0.00029703454460180994
0.00028855506860618060
0.00028031765709250246
0.00027231539982086638
0.00026454158381870234
0.00025698968774936278
0.00024965337644147724
0.00024252649557446860
0.00023560306651578943
0.00022887728130553569
0.00022234349778423946
0.00021599623485974305
0.00020983016790919820
0.00020384012431231589
0.00019802107911213762
0.00019236815079967187
0.00018687659721887198
0.00018154181158851174
0.00017635931863762839
0.00017132477085128240
0.00016643394482349666
0.00016168273771430120
0.00015706716380792661
0.00015258335116924421
0.00014822753839566037
0.00014399607146173128
0.00013988540065385807
0.00013589207759248320
0.00013201275233930003
0.00012824417058703727
0.00012458317092947264
0.00012102668220937439
0.00011757172094215637
0.00011421538881307586
0.00011095487024588292
0.00010778743004087489
0.00010471041108037850
0.00010172123209973579
0.00009881738552191826
0.00009599643535395989
0.00009325601514343841
0.00009059382599329479
0.00008800763463332296
0.00008549527154671382
0.00008305462915007940
0.00008068366002543428
0.00007838037520264594
0.00007614284249091982
0.00007396918485791192
0.00007185757885511613
0.00006980625308819961
0.00006781348673100824
0.00006587760808198995
0.00006399699316183133
0.00006217006435112458
0.00006039528906692736
0.00005867117847710152
0.00005699628625135462
0.00005536920734793525
0.00005378857683496510
0.00005225306874541754
0.00005076139496478486
0.00004931230415049735
0.00004790458068219223
0.00004653704364194703
0.00004520854582362620
0.00004391797277050659
0.00004266424184037725
0.00004144630129732634
0.00004026312942945688
0.00003911373369178711
0.00003799714987362030
0.00003691244128968237
0.00003585869799435114
0.00003483503601831654
0.00003384059662703241
0.00003287454560033661
0.00003193607253263691
0.00003102439015307334
0.00003013873366508914
0.00002927836010485436
0.00002844254771800448
0.00002763059535417203
0.00002684182187880157
0.00002607556560175689
0.00002533118372223859
0.00002460805178954863
0.00002390556317924779
0.00002322312858426770
0.00002256017552055016
0.00002191614784679894
0.00002129050529794079
0.00002068272303190597
0.00002009229118934569
0.00001951871446591904
0.00001896151169678939
0.00001842021545298276
0.00001789437164926870
0.00001738353916323501
0.00001688728946523663
0.00001640520625890897
0.00001593688513194291
0.00001548193321682965
0.00001503996886128969
0.00001461062130811105
0.00001419353038412629
0.00001378834619806890
0.00001339472884705443
0.00001301234813144163
0.00001264088327783261
0.00001228002266998105
0.00001192946358738184
0.00001158891195132367
0.00001125808207819075
0.00001093669643980716
0.00001062448543062252
0.00001032118714154423
0.00001002654714022571
0.00000974031825762706
0.00000946226038066848
0.00000919214025080334
0.00000892973126834098
0.00000867481330235549
0.00000842717250602152
0.00000818660113722120
0.00000795289738427250
0.00000772586519663236
0.00000750531412043302
0.00000729105913871302
0.00000708292051620935
0.00000688072364858016
0.00000668429891593195
0.00000649348154052789
0.00000630811144855838
0.00000612803313585737
0.00000595309553745251
0.00000578315190083884
0.00000561805966287045
0.00000545768033016629
0.00000530187936293030
0.00000515052606208794
0.00000500349345964475
0.00000486065821217472
0.00000472190049734951
0.00000458710391342120
0.00000445615538157468
0.00000432894505106746
0.00000420536620707767
0.00000408531518118252
0.00000396869126439247
0.00000385539662266791
0.00000374533621484778
0.00000363841771292088
0.00000353455142457338
0.00000343365021794718
0.00000333562944854643
0.00000324040688823049
0.00000314790265623399
0.00000305803915215605
0.00000297074099086251
0.00000288593493924646
0.00000280354985479411
0.00000272351662590437
0.00000264576811391223
0.00000257023909676713
0.00000249686621431913
0.00000242558791516709
0.00000235634440502412
0.00000228907759655704
0.00000222373106065780
0.00000216024997910595
0.00000209858109858250
0.00000203867268599647
0.00000198047448508678
0.00000192393767426310
0.00000186901482565009
0.00000181565986530089
0.00000176382803454637
0.00000171347585244781
0.00000166456107932134
0.00000161704268130375
0.00000157088079592976
0.00000152603669869205
0.00000148247277055583
0.00000144015246640080
0.00000139904028436398
0.00000135910173605781
0.00000132030331763826
0.00000128261248169906
0.00000124599760996809
0.00000121042798678336
0.00000117587377332604
0.00000114230598258919
0.00000110969645506096
0.00000107801783510200
0.00000104724354799724
0.00000101734777766277
0.00000098830544498910
0.00000096009218680269
0.00000093268433542803
0.00000090605889883323
0.00000088019354134230
0.00000085506656489811
0.00000083065689086024
0.00000080694404232238
0.00000078390812693462
0.00000076152982021602
0.00000073979034934358
0.00000071867147740407
0.00000069815548809529
0.00000067822517086415
0.00000065886380646903
0.00000064005515295423
0.00000062178343202483
0.00000060403331581056
0.00000058678991400744
0.00000057003876138655
0.00000055376580565934
0.00000053795739568944
0.00000052260027004086
0.00000050768154585320
0.00000049318870803443
0.00000047910959876214
0.00000046543240728455
0.00000045214566001262
0.00000043923821089506
0.00000042669923206807
0.00000041451820477198
0.00000040268491052728
0.00000039118942256242
0.00000038002209748644
0.00000036917356719928
0.00000035863473103300
0.00000034839674811734
0.00000033845102996332
0.00000032878923325844
0.00000031940325286760
0.00000031028521503382
0.00000030142747077312
0.00000029282258945781
0.00000028446335258315
0.00000027634274771176
0.00000026845396259106
0.00000026079037943855
0.00000025334556939027
0.00000024611328710767
0.00000023908746553855
0.00000023226221082750
0.00000022563179737157
0.00000021919066301722
0.00000021293340439428
0.00000020685477238315
0.00000020094966771138
0.00000019521313667600
0.00000018964036698790
0.00000018422668373489
0.00000017896754545999
0.00000017385854035164
0.00000016889538254277
0.00000016407390851535
0.00000015939007360776
0.00000015483994862176
0.00000015041971652632
0.00000014612566925561
0.00000014195420459833
0.00000013790182317588
0.00000013396512550679
0.00000013014080915493
0.00000012642566595918
0.00000012281657934210
0.00000011931052169553
0.00000011590455184075
0.00000011259581256116
0.00000010938152820545
0.00000010625900235908
0.00000010322561558236
0.00000010027882321302
0.00000009741615323150
0.00000009463520418727
0.00000009193364318425
0.00000008930920392377
0.00000008675968480344
0.00000008428294707024
0.00000008187691302635
0.00000007953956428621
0.00000007726894008332
0.00000007506313562538
0.00000007292030049641
0.00000007083863710442
0.00000006881639917349
0.00000006685189027881
0.00000006494346242359
0.00000006308951465656
0.00000006128849172900
0.00000005953888279001
0.00000005783922011912
0.00000005618807789503
0.00000005458407099950
0.00000005302585385541
0.00000005151211929798
0.00000005004159747818
0.00000004861305479751
0.00000004722529287311
0.00000004587714753250
0.00000004456748783695
0.00000004329521513276
0.00000004205926212960
0.00000004085859200519
0.00000003969219753552
0.00000003855910024993
0.00000003745834961023
0.00000003638902221337
0.00000003535022101678
0.00000003434107458583
0.00000003336073636287
0.00000003240838395697
0.00000003148321845412
0.00000003058446374697
0.00000002971136588379
0.00000002886319243600
0.00000002803923188371
0.00000002723879301889
0.00000002646120436548
0.00000002570581361612
0.00000002497198708494
0.00000002425910917596
0.00000002356658186669
0.00000002289382420645
0.00000002224027182901
0.00000002160537647917
0.00000002098860555282
0.00000002038944165016
0.00000001980738214167
0.00000001924193874642
0.00000001869263712250
0.00000001815901646909
0.00000001764062913990
0.00000001713704026763
0.00000001664782739921
0.00000001617258014135
0.00000001571089981633
0.00000001526239912749
0.00000001482670183440
0.00000001440344243719
0.00000001399226586995
0.00000001359282720288
0.00000001320479135293
0.00000001282783280269
0.00000001246163532734
0.00000001210589172934
0.00000001176030358079
0.00000001142458097301
0.00000001109844227339
0.00000001078161388909
0.00000001047383003759
0.00000001017483252366
0.00000000988437052282
0.00000000960220037089
0.00000000932808535959
0.00000000906179553798
0.00000000880310751958
0.00000000855180429490
0.00000000830767504948
0.00000000807051498698
0.00000000784012515742
0.00000000761631229025
0.00000000739888863225
0.00000000718767178999
0.00000000698248457687
0.00000000678315486443
0.00000000658951543800
0.00000000640140385639
0.00000000621866231563
0.00000000604113751662
0.00000000586868053648
0.00000000570114670367
0.00000000553839547658
0.00000000538029032567
0.00000000522669861893
0.00000000507749151060
0.00000000493254383308
0.00000000479173399197
0.00000000465494386402
0.00000000452205869806
0.00000000439296701873
0.00000000426756053298
0.00000000414573403920
0.00000000402738533900
0.00000000391241515143
0.00000000380072702975
0.00000000369222728047
0.00000000358682488481
0.00000000348443142229
0.00000000338496099657
0.00000000328833016343
0.00000000319445786072
0.00000000310326534038
0.00000000301467610240
0.00000000292861583059
0.00000000284501233030
0.00000000276379546781
0.00000000268489711154
0.00000000260825107483
0.00000000253379306050
0.00000000246146060684
0.00000000239119303524
0.00000000232293139930
0.00000000225661843538
0.00000000219219851453
0.00000000212961759585
0.00000000206882318115
0.00000000200976427092
0.00000000195239132154
0.00000000189665620370
0.00000000184251216206
0.00000000178991377600
0.00000000173881692154
0.00000000168917873428
0.00000000164095757351
0.00000000159411298722
0.00000000154860567821
0.00000000150439747107
0.00000000146145128021
0.00000000141973107872
0.00000000137920186816
0.00000000133982964918
0.00000000130158139303
0.00000000126442501382
0.00000000122832934162
0.00000000119326409633
0.00000000115919986223
0.00000000112610806337
0.00000000109396093952
0.00000000106273152296
0.00000000103239361580
0.00000000100292176802
0.00000000097429125614
0.00000000094647806246
0.00000000091945885490
0.00000000089321096748
0.00000000086771238122
0.00000000084294170575
0.00000000081887816132
0.00000000079550156140
0.00000000077279229570
0.00000000075073131377
0.00000000072930010899
0.00000000070848070303
0.00000000068825563081
0.00000000066860792584
0.00000000064952110593
0.00000000063097915946
0.00000000061296653186
0.00000000059546811261
0.00000000057846922255
0.00000000056195560158
0.00000000054591339665
0.00000000053032915022
0.00000000051518978888
0.00000000050048261247
0.00000000048619528335
0.00000000047231581610
0.00000000045883256744
0.00000000044573422648
0.00000000043300980522
0.00000000042064862934
0.00000000040864032923
0.00000000039697483131
0.00000000038564234957
0.00000000037463337736
0.00000000036393867943
0.00000000035354928415
0.00000000034345647601
0.00000000033365178832
0.00000000032412699606
0.00000000031487410904
0.00000000030588536515
0.00000000029715322386
0.00000000028867035991
0.00000000028042965717
0.00000000027242420262
0.00000000026464728061
0.00000000025709236720
0.00000000024975312469
0.00000000024262339630
0.00000000023569720101
0.00000000022896872853
0.00000000022243233446
0.00000000021608253550
0.00000000020991400492
0.00000000020392156802
0.00000000019810019784
0.00000000019244501091
0.00000000018695126320
0.00000000018161434607
0.00000000017642978247
0.00000000017139322315
0.00000000016650044300
0.00000000016174733756
0.00000000015712991952
0.00000000015264431539
0.00000000014828676226
0.00000000014405360466
0.00000000013994129144
0.00000000013594637286
0.00000000013206549764
0.00000000012829541016
0.00000000012463294776
0.00000000012107503805
0.00000000011761869637
0.00000000011426102323
0.00000000011099920193
0.00000000010783049618
0.00000000010475224781
0.00000000010176187451
0.00000000009885686771
0.00000000009603479044
0.00000000009329327530
0.00000000009063002248
0.00000000008804279782
0.00000000008552943092
0.00000000008308781338
0.00000000008071589694
78 195.08400000000000318323 3.91999999999999992895 FCC
-0.00000149401611798452
-1.71971407833436473744
-2.88115728565916917603
-3.86436002753691010270
-4.73977500733698597912
-5.53918196455821210122
-6.28060361639403552658
-6.97558742798714703781
-7.63212709642438014157
-8.25606216179900087582
-8.85183143754217560684
-9.42291386070012570997
-9.97210320093888924475
-10.50168789985063000358
-11.01357358377493866897
-11.50936930861470841592
-11.99044996942431140496
-12.45800253476330787805
-12.91306099869106027711
-13.35653327408160251366
-13.78922220906995121936
-14.21184223851962258323
-14.62503274024351895832
-15.02936886704737062814
-15.42537041971685241037
-15.81350918139493444414
-16.19421503044614851774
-16.56788107394302755893
-16.93486798877879095926
-17.29550771634416861389
-17.65010662575722122369
-17.99894823705707835870
-18.34229557763017481875
-18.68039323104730797809
-19.01346912645180964319
-19.34173610792210595832
-19.66539331629612519237
-19.98462741038659373771
-20.29961365003285322928
-20.61051685979522929415
-20.91749228912605573782
-21.22068638241148974544
-21.52023747026396804927
-21.81627639177429145434
-22.10892705603961871930
-22.39830695011771055647
-22.68452759957718711803
-22.96769498698580136420
-23.24790993297723673550
-23.52526844393977256686
-23.79986202986092536094
-24.07177799542530038934
-24.34109970708794534744
-24.60790683852178162283
-24.87227559655831043983
-25.13427892949789210775
-25.39398671945525265414
-25.65146596022173497431
-25.90678092196528581326
-26.15999330394801347666
-26.41116237631772278860
-26.66034511192072642416
-26.90759630898691057155
-27.15296870545372698302
-27.39651308561954579091
-27.63827837975080825572
-27.87831175720729248724
-28.11665871359744173219
-28.35336315242767213363
-28.58846746166804209111
-28.82201258561797629909
-29.05403809242259427492
-29.28458223755863087945
-29.51368202358238690408
-29.74137325640662510295
-29.96769059835135351477
-30.19266761819286415403
-30.41633683841751079058
-30.63872977986953216600
-30.85987700396752941856
-31.07980815265054985730
-31.29855198620182221703
-31.51613641908718932427
-31.73258855393499899833
-31.94793471377415983170
-32.16220047263923476066
-32.37541068464267368654
-32.58758951160777428413
-32.79876044934877654669
-33.00894635267855647953
-33.21816945921875685599
-33.42645141208227244078
-33.63381328149260696136
-33.84027558540093139072
-34.04585830915712563183
-34.25058092428783140804
-34.45446240643030932915
-34.65752125246880410714
-34.85977549691595811510
-35.06124272758005133710
-35.26194010055584726615
-35.46188435457436582965
-35.66109182474507122151
-35.85957845572171720505
-36.05735981432115977441
-36.25445110162279860333
-36.45086716457456788021
-36.64662250713012525694
-36.84173130093987680311
-37.03620739561812769125
-37.23006432860607617386
-37.42331533465070236844
-37.61597335491705251798
-37.80805104575183150928
-37.99956078711385032420
-38.19051469068728010825
-38.38092460769180291891
-38.57080213640367105654
-38.76015862940064238273
-38.94900520054292769601
-39.13735273170208728288
-39.32521187924879768616
-39.51259308030994787941
-39.69950655880523271435
-39.88596233127238122051
-40.07197021249027102385
-40.25753982090839144803
-40.44268058389057785007
-40.62740174278104632322
-40.81171235779977735092
-40.99562131277431120679
-41.17913731971469815107
-41.36226892323774251281
-41.54502450484687869903
-41.72741228707269556253
-41.90944033748082375723
-42.09111657255095195751
-42.27244876143316076877
-42.45344452958561021205
-42.63411136229824904831
-42.81445660810717157574
-42.99448748210355120136
-43.17421106914076034400
-43.35363432694427388014
-43.53276408912702066800
-43.71160706811461693633
-43.89016985798279790743
-44.06845893721088458506
-44.24648067135419893248
-44.42424131563839750925
-44.60174701747773440275
-44.77900381892142434026
-44.95601765902895863292
-45.13279437617822509310
-45.30933971030798090851
-45.48565930509700194762
-45.66175871008246645033
-45.83764338271926419566
-46.01331869038226329849
-46.18878991231380837235
-46.36406224151762955898
-46.53914078660169195700
-46.71403057357099442015
-46.88873654757229303414
-47.06326357459256826132
-47.23761644311200313950
-47.41179986571378890403
-47.58581848065119856983
-47.75967685337447221627
-47.93337947801749976406
-48.10693077884667445687
-48.28033511167225810823
-48.45359676522399183796
-48.62671996249167705173
-48.79970886203219038180
-48.97256755924354365561
-49.14530008760725365846
-49.31791041989988855221
-49.49040246937482834255
-49.66278009091479361814
-49.83504708215659206871
-50.00720718458842384280
-50.17926408462049892023
-50.35122141463037337417
-50.52308275398281978141
-50.69485163002593708370
-50.86653151906325831533
-51.03812584730343360206
-51.20963799178738895534
-51.38107128129392719984
-51.55242899722462368572
-51.72371437446774677937
-51.89493060224305054362
-52.06608082492694222765
-52.23716814285877774182
-52.40819561312920882301
-52.57916625035068136640
-52.75008302741082388820
-52.92094887620859822164
-53.09176668837490353781
-53.26253931597663893172
-53.43326957220540407434
-53.60396023205170479287
-53.77461403296361197590
-53.94523367549182069070
-54.11582182392078266275
-54.28638110688594053954
-54.45691411797793080041
-54.62742341633426690350
-54.79791152721799107894
-54.96838094258460216679
-55.13883412163676212003
-55.30927349136766224547
-55.47970144709287865226
-55.65012035297158377034
-55.82053254251660234786
-55.99094031909420721149
-56.16134595641391058507
-56.33175169900789569510
-56.50215976270106921220
-56.67257233507166347408
-56.84299157590224638170
-57.01341961762200583053
-57.18385856574039394218
-57.35431049927173319247
-57.52477747115192130423
-57.69526150864635383186
-57.86576461375082658378
-58.03628876358351362796
-58.20683591077019514159
-58.37740798382159823632
-58.54800688750358972356
-58.71863450320043398278
-58.88929268927097382402
-59.05998328139781960999
-59.23070809293059824086
-59.40146891522189775969
-59.57226751795741392925
-59.74310564948004298458
-59.91398503710755107932
-60.08490738744447412500
-60.25587438668827644506
-60.42688770093013772566
-60.59794897644968614259
-60.76905984000478611051
-60.94022189911601117274
-61.11143674234565992265
-61.28270593957205392144
-61.45403104225871970812
-61.62541358371896649260
-61.79685507937540478451
-61.96835702701514492219
-62.13992090704027759784
-62.31154818271409112640
-62.48324030040291177102
-62.65499868981356712538
-62.82682476422689887841
-62.99871992072715443101
-63.17068554042731420850
-63.34272298869058204218
-63.51483361534818072869
-63.68701875491331065859
-63.85927972679112940568
-64.03161783548611651895
-64.20403437080466346742
-64.37653060805524773969
-64.54910780824462790406
-64.72176721827113965446
-64.89451007111452440768
-65.06733758602260309090
-65.24025096869496564977
-65.41325141146364785527
-65.58634009347048277050
-65.75951818084212163740
-65.93278682686155889314
-66.10614717213749713665
-66.27960034477024464650
-66.45314746051559495754
-66.62678962294563689284
-66.80052792360709190689
-66.97436344217706505333
-67.14829724661669274610
-67.32233039332143675892
-67.49646392727012766954
-67.67069888217048401202
-67.84503628060363666918
-68.01947713416524265995
-68.19402244360449572014
-68.36867319896200001494
-68.54343037970440377649
-68.71829495485704342173
-68.89326788313545080200
-69.06835011307362037769
-69.24354258315099741594
-69.41884622191759035559
-69.59426194811672417018
-69.76979067080620211527
-69.94543328947781901661
-70.12119069417454397808
-70.29706376560636726936
-70.47305337526407242876
-70.64916038553189991944
-70.82538564979753914486
-71.00173001256158045180
-71.17819430954446602300
-71.35477936779244600984
-71.53148600578145988038
-71.70831503351988089889
-71.88526725264958372463
-72.06234345654593198560
-72.23954443041506578993
-72.41687095139167240632
-72.59432378863348844789
-72.77190370341588732117
-72.94961144922396556467
-73.12744777184420286176
-73.30541340945399042539
-73.48350909271064779205
-73.66173554483899010847
-73.84009348171687747708
-74.01858361196067903620
-74.19720663700863383383
-74.37596325120401274944
-74.55485414187563719679
-74.73387998941876730896
-74.91304146737419955571
-75.09233924250602854045
-75.27177397487861298941
-75.45134631793277435463
-75.63105691856040380117
-75.81090641717784706088
-75.99089544779963034671
-76.17102463810945778278
-76.35129460953126567802
-76.53170597729902624451
-76.71225935052581235141
-76.89295533227141277166
-77.07379451960963478996
-77.25477750369444152057
-77.43590486982495235679
-77.61717719750984656457
-77.79859506053128370695
-77.98015902700711876605
-78.16186965945280462620
-78.34372751484221453211
-78.52573314466852139049
-78.70788709500288859999
-78.89018990655316088123
-79.07264211472218562449
-79.25524424966445735663
-79.43799683634250641262
-79.62090039458286128138
-79.80395543913027722738
-79.98716247970261861155
-80.17052202104389380111
-80.35403456297717639245
-80.53770060045673062632
-80.72152062361936941670
-80.90549511783513025875
-81.08962456375792271501
-81.27390943737430006877
-81.45835021005262888139
-81.64294734859174695885
-81.82770131526768864205
-82.01261256788177433918
-82.19768155980619894763
-82.38290874003024555350
-82.56829455320558963649
-82.75383943969092115367
-82.93954383559628240619
-83.12540817282632588103
-83.31143287912374262305
-83.49761837811166742540
-83.68396508933568611610
-83.87047342830533125380
-84.05714380653506623275
-84.24397663158487148394
-84.43097230710020539846
-84.61813123285116944317
-84.80545380477201433678
-84.99294041499962304442
-85.18059145191136849462
-85.36840730016280076597
-85.55638834072482268311
-85.74453495092086541263
-85.93284750446201769591
-86.12132637148431513197
-86.30997191858318728919
-86.49878450884898484219
-86.68776450190091509285
-86.87691225392188698606
-87.06622811769227610057
-87.25571244262255277135
-87.44536557478704708046
-87.63518785695640644917
-87.82517962862937110913
-88.01534122606534538136
-88.20567298231480890536
-88.39617522725143317075
-88.58684828760266327663
-88.77769248697927650937
-88.96870814590636200592
-89.15989558185253827105
-89.35125510925956859865
-89.54278703957095331134
-89.73449168126091990416
-89.92636933986278791053
-90.11842031799682217752
-90.31064491539819982791
-90.50304342894395404073
-90.69561615268042942262
-90.88836337785005525802
-91.08128539291749348195
-91.27438248359624139994
-91.46765493287404069633
-91.66110302103908225035
-91.85472702570467617988
-92.04852722183454716287
-92.24250388176773185478
-92.43665727524279418503
-92.63098766942198381003
-92.82549532891562193981
-93.02018051580517976618
-93.21504348966692532485
-93.41008450759534298413
-93.60530382422552975186
-93.80070169175598948641
-93.99627835997119973399
-94.19203407626412172249
-94.38796908565706189620
-94.58408363082389769261
-94.78037795211207594548
-94.97685228756284914198
-95.17350687293298960867
-95.37034194171502576864
-95.56735772515787630255
-95.76455445228782537015
-95.96193234992733778199
-96.15949164271597737752
-96.35723255312979063092
-96.55515530150063341353
-96.75326010603549775624
-96.95154718283544070800
-97.15001674591457003771
-97.34866900721874571900
-97.54750417664359929404
-97.74652246205363326226
-97.94572406929904673234
-98.14510920223494849779
-98.34467806273801215866
-98.54443085072438179850
-98.74436776416723660077
-98.94448899911310491007
-99.14479474970005412615
-99.34528520817320895731
-99.54596056490225919333
-99.74682100839743270626
-99.94786672532592319840
-100.14909790052792004644
-100.35051471703292236270
-100.55211735607468881426
-100.75390599710749484075
-100.95588081782182143797
-101.15804199415862285605
-101.36038970032575434743
-101.56292410881167143089
-101.76564539040128920533
-101.96855371419047742165
-102.17164924759987343350
-102.37493215639011623352
-102.57840260467571624758
-102.78206075493898197237
-102.98590676804479926432
-103.18994080325313689173
-103.39416301823405319738
-103.59857356908014480723
-103.80317261032092801543
-104.00796029493528749299
-104.21293677436506186496
-104.41810219852834507037
-104.62345671583136663685
-104.82900047318247516159
-105.03473361600401858595
-105.24065628824484974757
-105.44676863239317299303
-105.65307078948842445243
-105.85956289913343653097
-106.06624509950688661775
-106.27311752737460892604
-106.48018031810181582841
-106.68743360566475075757
-106.89487752266177267302
-107.10251220032580476982
-107.31033776853439576371
-107.51835435582239597352
-107.72656208939133648528
-107.93496109512261682539
-108.14355149758637253399
-108.35233342005352596971
-108.56130698450618865536
-108.77047231164794993674
-108.97982952091501829273
-109.18937873048599840331
-109.39912005729257771236
-109.60905361702970139959
-109.81917952416557682227
-110.02949789195139373987
-110.24000883243229509389
-110.45071245645601720753
-110.66160887368306475764
-110.87269819259671521650
-111.08398052051188642508
-111.29545596358559578221
-111.50712462682508885337
-111.71898661409835540326
-111.93104202814220116124
-112.14329097057208173283
-112.35573354189153860716
-112.56836984149998670546
-112.78119996770237776218
-112.99422401771772683787
-113.20744208768820726618
-113.42085427268727926275
-113.63446066672815959464
-113.84826136277303021416
-114.06225645274111002436
-114.27644602751581714983
-114.49083017695545549941
-114.70540898989855804757
-114.92018255417457339718
-115.13515095660977749503
-115.35031428303642542232
-115.56567261830088000352
-115.78122604626975089559
-115.99697464983961481266
-116.21291851094349567575
-116.42905771055882269138
-116.64539232871453577900
-116.86192244449955524033
-117.07864813606897769205
-117.29556948065203414444
-117.51268655455959333267
-117.72999943319041449286
-117.94750819103961703149
-118.16521290170425118049
-118.38311363789165397975
-118.60121047142553152298
-118.81950347325312122848
-119.03799271345206989281
-119.25667826123714121422
-119.47556018496680962926
-119.69463855215008152300
-119.91391342945314590906
-120.13338488270534298863
-120.35305297690632642116
-120.57291777623231610050
-120.79297934404195302704
-121.01323774288346157846
-121.23369303449987910426
-121.45434527983593397948
-121.67519453904469628469
-121.89624087149195474922
-122.11748433576417482982
-122.33892498967287565392
-122.56056289026201966408
-122.78239809381267377830
-123.00443065584909163590
-123.22666063114559165115
-123.44908807373064973945
-123.67171303689366368417
-123.89453557319001220094
-124.11755573444730771371
-124.34077357177017120193
-124.56418913554631444640
-124.78780247545171278034
-125.01161364045532309319
-125.23562267882647347506
-125.45982963813776223105
-125.68423456527187909160
-125.90883750642581162538
-126.13363850711692748519
-126.35863761218780609852
-126.58383486581124088843
-126.80923031149495727732
-127.03482399208689912484
-127.26061594978051516591
-127.48660622611907911050
-127.71279486200097608162
-127.93918189768464799272
-128.16576737279262943048
-128.39255132631751621375
-128.61953379662531915528
-128.84671482146120524703
-129.07409443795359038631
-129.30167268261914159666
-129.52944959136658553689
-129.75742519950233599957
-129.98559954173401820299
-130.21397265217524363834
-130.44254456435032807349
-130.67131531119832743570
-130.90028492507690316415
-131.12945343776823392545
-131.35882088048163041094
-131.58838728385808281018
-131.81815267797514934500
-132.04811709235104899562
-132.27828055594738998479
-132.50864309717553624068
-132.73920474389888113365
-132.96996552343750863656
-133.20092546257205867732
-133.43208458754850198602
-133.66344292408064120536
-133.89500049735511311155
-134.12675733203468553256
-134.35871345226235007431
-134.59086888166530115996
-134.82322364335857400874
-135.05577775994856892794
-135.28853125353680297849
-135.52148414572423007485
-135.75463645761374209542
-135.98798820981528479024
-136.22153942244790414406
-136.45529011514440753672
-136.68924030705466066138
-136.92339001684899812972
-137.15773926272152039019
-137.39228806239407276735
-137.62703643311931500648
-137.86198439168356344453
-138.09713195441213429149
-138.33247913717002575140
-138.56802595536748867744
-138.80377242396207293496
-139.03971855746237906715
-139.27586436993078677915
-139.51220987498777503788
-139.74875508581419580878
-139.98550001515411622677
-140.22244467531970713026
-140.45958907819226624270
-140.69693323522631089872
-140.93447715745310233615
-141.17222085548291943269
-141.41016433950835562428
-141.64830761930738844967
-141.88665070424667646876
-142.12519360328326456511
-142.36393632496969985368
-142.60287887745437274134
-142.84202126848674652138
-143.08136350541849424189
-143.32090559520759143197
-143.56064754442013509106
-143.80058935923398166778
-144.04073104544079342304
-144.28107260844956272194
-144.52161405328865839692
-144.76235538460923635284
-145.00329660668728593009
-145.24443772342624470184
-145.48577873836052276602
-145.72731965465766279522
-145.96906047512038639979
-146.21100120219034579350
-146.45314183794948803552
-146.69548238412369300931
-146.93802284208436503832
-147.18076321285172980424
-147.42370349709710808384
-147.66684369514496211195
-147.91018380697619249986
-148.15372383222938879044
-148.39746377020446743700
-148.64140361986528660054
-148.88554337983964614978
-149.12988304842497200298
-149.37442262358786138066
-149.61916210296851659223
-149.86410148388176821754
-150.10924076331968990416
-150.35457993795421316463
-150.60011900413928742637
-150.84585795791258533427
-151.09179679499845860846
-151.33793551080998440739
-151.58427410045032956987
-151.83081255871684334124
-152.07755088010117106023
-152.32448905879243739037
-152.57162708867929268308
-152.81896496335241408815
-153.06650267610530136153
-153.31424021993814221787
-153.56217758755849445151
-153.81031477138367336011
-154.05865176354382128920
-154.30718855588213500596
-154.55592513995838999108
-154.80486150705041836773
-155.05399764815581420407
-155.30333355399432093691
-155.55286921500953667419
-155.80260462137107424496
-156.05253976297683493613
-156.30267462945369061345
-156.55300921016032589250
-156.80354349418962556229
-157.05427747036901564570
-157.30521112726398769155
-157.55634445317878089554
-157.80767743615842846339
-158.05921006399159978173
-158.31094232421025935764
-158.56287420409444166580
-158.81500569067054584593
-159.06733677071611054998
-159.31986743076038237632
-159.57259765708579379861
-159.82552743573012321576
-160.07865675248740444658
-160.33198559291156470863
-160.58551394231562881032
-160.83924178577558450343
-161.09316910813049616991
-161.34729589398523330601
-161.60162212771115264331
-161.85614779344837188546
-162.11087287510792975809
-162.36579735637201338250
-162.62092122069623201241
-162.87624445131189077074
-163.13176703122644539690
-163.38748894322577598359
-163.64341016987543753203
-163.89953069352259262814
-164.15585049629669356364
-164.41236956011221082008
-164.66908786666920150310
-164.92600539745501464495
-165.18312213374622388073
-165.44043805660953694314
-165.69795314690350096498
-165.95566738528054884227
-166.21358075218699923425
-166.47169322786601242115
-166.73000479235804505151
-166.98851542550312387903
-167.24722510694107313611
-167.50613381611435670493
-167.76524153226796443050
-168.02454823445202691801
-168.28405390152249765379
-168.54375851214331305528
-168.80366204478616509732
-169.06376447773322979629
-169.32406578907898619946
-169.58456595672942057718
-169.84526495840532334114
-170.10616277164274379174
-170.36725937379424067331
-170.62855474203036010294
-170.89004885334134087316
-171.15174168453779657284
-171.41363321225162508199
-171.67572341293839599530
-171.93801226287780536950
-172.20049973817492627859
-172.46318581476157305588
-172.72607046839846134390
-172.98915367467373016552
-173.25243540900794414483
-173.51591564665193345718
-173.77959436268952231330
-174.04347153203900688823
-174.30754712945372375543
-174.57182112952284569474
-174.83629350667331436853
-175.10096423517086350330
-175.36583328912115575804
-175.63090064247012378473
-175.89616626900624396512
-176.16163014236065009754
-176.42729223600974819419
-176.69315252327396592591
-176.95921097732116322732
-177.22546757116640492313
-177.49192227767366603075
-177.75857506955571807339
-178.02542591937753968523
-178.29247479955461130885
-178.55972168235621211352
-178.82716653990485156100
-179.09480934417865682917
-179.36265006701125912514
-179.63068868009372636152
-179.89892515497467684327
-180.16735946306221194391
-180.43599157562448453973
-180.70482146379015375715
-180.97384909855065870943
-181.24307445076010480989
-181.51249749113640064024
-181.78211819026296325319
-182.05193651858871817240
-182.32195244642969100823
-182.59216594396980326565
-182.86257698126155446516
-183.13318552822738638497
-183.40399155466059255559
-183.67499503022520457307
-183.94619592445928901725
-184.21759420677301477554
-184.48918984645115415333
-184.76098281265433342924
-185.03297307441880548140
-185.30516060065804140322
-185.57754536016375368490
-185.85012732160544146609
-186.12290645353323270683
-186.39588272437777050072
-186.66905610245044044859
-186.94242655594598545576
-187.21599405294102780317
-187.48975856139691131830
-187.76372004915970137517
-188.03787848396109438909
-188.31223383341898625076
-188.58678606503872288158
-188.86153514621412341512
-189.13648104422748019715
-189.41162372625092302769
-189.68696315934721496888
-189.96249931047020709229
-190.23823214646620272106
-190.51416163407452586398
-190.79028773992774858925
-191.06661043055282789283
-191.34312967237258362729
-191.61984543170581218874
-191.89675767476740020356
-192.17386636767002983106
-192.45117147642508825811
-192.72867296694266769919
-193.00637080503270226473
-193.28426495640576376900
-193.56235538667317541695
-193.84064206134871710674
-194.11912494584862542979
-194.39780400549273053912
-194.67667920550502458354
-194.95575051101423014188
-195.23501788705448234396
-195.51448129856635205215
-195.79414071039707323507
-196.07399608730224827013
-196.35404739394471107516
-196.63429459489714190568
-196.91473765464172629436
-197.19537653757072348526
-197.47621120798783067585
-197.75724163010818301700
-198.03846776805880836037
-198.31988958588101468195
-198.60150704752879846637
-198.88332011686998157529
-199.16532875768928079196
-199.44753293368444246880
-199.72993260847192686924
-200.01252774558292912843
-200.29531830846769935306
-200.57830426049395100563
-200.86148556494845252018
-201.14486218503668624180
-201.42843408388466741599
-201.71220122453894418868
-201.99616356996705235360
-202.28032108305865222064
-202.56467372662496018165
-202.84922146340136350773
-203.13396425604605610715
-203.41890206714151645429
-203.70403485919484865008
-203.98936259463891929045
-204.27488523583178903209
-204.56060274505887264240
-204.84651508453157475742
-205.13262221639001836593
-205.41892410270145319373
-205.70542070546264312725
-205.99211198659929777932
-206.27899790796641354973
-206.56607843135009261459
-206.85335351846777030005
-207.14082313096673715336
-207.42848723042766323488
-207.71634577836300650233
-208.00439873621917286073
-208.29264606537481085979
-208.58108772714399492543
-208.86972368277452005714
-209.15855389344937975693
-209.44757832028778921085
-209.73679692434529897582
-210.02620966661265811126
-210.31581650801911109738
-210.60561740943114727997
-210.89561233165397879930
-211.18580123543029003486
-211.47618408144342083688
-211.76676083031497910270
-212.05753144260791032139
-212.34849587882467858435
-212.63965409940954032209
-212.93100606474774849630
-213.22255173516782633669
-213.51429107093952097784
-213.80622403227619088284
-214.09835057933378266171
-214.39067067221412798972
-214.68318427096119194175
-214.97589133556562046579
-215.26879182596144346462
-215.56188570203028120886
-215.85517292359850216599
-216.14865345044063360547
-216.44232724227651942783
-216.73619425877450339613
-217.03025445955165650957
-217.32450780417116220633
-217.61895425214720489748
-217.91359376294235516980
-218.20842629596882034093
-218.50345181058889920678
-218.79867026611555047566
-219.09408162181284751568
-219.38968583689563729422
-219.68548287053135936731
-219.98147268183856795076
-220.27765522988920565695
-220.57403047370814874739
-220.87059837227366188017
-221.16735888451762548357
-221.46431196932553575607
-221.76145758553923315048
-222.05879569195349176880
-222.35632624731999840151
-222.65404921034519247769
-222.95196453969242611493
-223.25007219398128199828
-223.54837213178780075395
-223.84686431164629993873
-224.14554869204800979787
-224.44442523144289225456
-224.74349388823759454681
-225.04275462080045144830
-225.34220738745682410809
-225.64185214649148747412
-225.94168885615101771691
-226.24171747464015425066
-226.54193796012543771212
-226.84235027073418677901
-227.14295436455483923055
-227.44375019963752038166
-227.74473773399483889079
-228.04591692560097726528
-228.34728773239351085067
-228.64885011227318045712
-228.95060402310321023833
-229.25254942271214986249
-229.55468626889137340186
-229.85701451939678463532
-230.15953413194938548259
-230.46224506423516231735
-230.76514727390622283565
-231.06824071857920444018
-231.37152535583777535066
-231.67500114323081561452
-231.97866803827605508559
-232.28252599845632175857
-232.58657498122227025306
-232.89081494399295024778
-233.19524584415478329902
-233.49986763906315445638
-233.80468028603991115233
-234.10968374237984335196
-234.41487796534261178749
-234.72026291216104709747
-235.02583854003489705065
-235.33160480613639720104
-235.63756166760686028283
-235.94370908155838151288
-236.25004700507554389333
-236.55657539521189391962
-236.86329420899483011453
-237.17020340342207873618
-237.47730293546487700951
-237.78459276206615413685
-238.09207284014132710581
305.64108041232486812078
296.91591274501308816980
288.43982334532137201677
280.20570175007452462523
272.20664047922696227033
264.43592924128427057440
256.88704930414036198272
249.55366802661072256342
242.42963354607724113521
235.50896961778292393319
228.78587060144994325128
222.25469659101725028449
215.90996868340710079792
209.74636438235759783311
203.75871313346044644277
197.94199198666041183969
192.29132138257983797303
186.80196105912941106908
181.46930607497344567491
176.28888294651557089310
171.25634589515973971174
166.36747320170277930629
161.61816366479905582310
157.00443316052215436684
152.52241130014687087169
148.16833818333543604240
143.93856124401645502076
139.82953218630137826040
135.83780400787262010454
131.96002810834610841084
128.19295148018071017759
124.53341397977905558037
120.97834567649184123184
117.52476427729830277258
114.16977262500662959610
110.91055626787235155462
107.74438109859687529024
104.66859106072695340117
101.68060592052881929703
98.77791910246874351742
95.95809558648549852933
93.21876986528812381039
90.55764395996817484047
87.97248549225983538236
85.46112581183125200823
83.02145817703706143220
80.65143598760448639950
78.34907106777102114847
76.11243199843450213393
73.93964249691420320687
71.82887984296608863133
69.77837334973030181118
67.78640287832851640815
65.85129739486571054385
63.97143356862514451677
62.14523441028040195988
60.37116794898338412168
58.64774594721671974185
56.97352265233416801493
55.34709358374048093765
53.76709435469349784853
52.23219952774162777587
50.74112150283329469858
49.29260943716987242169
47.88544819589161249951
46.51845733272007521464
45.19049009969913299756
43.90043248520583318850
42.64720227942268593324
41.42974816648816727138
40.24704884256399139986
39.09811215907846815298
37.98197429042838280111
36.89769892543998253132
35.84437648191193659386
34.82112334358048144622
33.82708111886702084803
32.86141592078663364873
31.92331766741264686971
31.01199940231136764623
30.12669663437615952262
29.26666669650731833485
28.43118812260005867643
27.61956004231741346189
26.83110159314065157332
26.06515134920417509079
25.32106676643517673142
24.59822364353329859910
23.89601559833753086082
23.21385355914133796773
22.55116527052943453668
21.90739481332131077806
21.28200213821897790467
20.67446261276792540684
20.08426658125076613715
19.51091893714481884103
18.95393870778472944494
18.41285865088180528915
17.88722486256144605932
17.37659639659013777191
16.88054489447228334598
16.39865422610674983162
15.93052014070163835413
15.47574992765436796560
15.03396208711273018821
14.60478600994040832006
14.18786166681862326300
13.78283930622292530188
13.38937916102195657686
13.00715116345197408521
12.63583466822794854068
12.27511818355910477862
11.92469910984317138514
11.58428348582016731427
11.25358574197271543937
10.93232846096611687869
10.62024214492713447555
10.31706498936632421248
10.02254266355418366174
9.73642809716695367683
9.45848127302307872810
9.18846902573640988976
8.92616484611730420795
8.67134869115746731438
8.42380679943922316966
8.18333151181428597454
7.94972109720165232005
7.72277958335842917847
7.50231659248170235088
7.28814718150346418923
7.08009168694468904448
6.87797557419833971437
6.68162929111493397727
6.49088812576780949115
6.30559206827878959700
6.12558567658830277480
5.95071794605739778916
5.78084218279223271963
5.61581588058479663772
5.45550060136659542565
5.29976185907505037420
5.14846900683518615693
5.00149512736193102569
4.85871692649114095275
4.72001462974997121336
4.58527188187990208945
4.45437564922805506740
4.32721612492499030367
4.20368663676936638041
4.08368355774225566535
3.96710621907600646807
3.85385682580472721526
3.74384037472557862358
3.63696457470201695017
3.53313976924216399667
3.43227886128732340154
3.33429724014757988826
3.23911271052317051300
3.14664542355209553293
3.05681780982610851183
2.96955451431891859215
2.88478233317199350694
2.80243015228495684354
2.72242888765904211823
2.64471142744357035070
2.56921257563683358427
2.49586899739415635224
2.42461916589725268167
2.35540331074030806491
2.28816336778949080966
2.22284293047382908171
2.15938720246658988344
2.09774295171747215960
2.03785846579704221782
1.97968350851596208706
1.92316927778260637893
1.86826836466373058521
1.81493471361382918694
1.76312358383983935894
1.71279151176876376361
1.66389627458673849958
1.61639685481895134522
1.57025340592070450363
1.52542721885075027721
1.48188068959886187770
1.43957728764039716296
1.39848152529139713174
1.35855892793850019373
1.31977600511871528965
1.28210022242477461596
1.24549997421251568142
1.20994455708738146704
1.17540414414780869379
1.14184975996389193043
1.10925325627032900222
1.07758728835327532991
1.04682529211126995605
1.01694146177101685247
0.98791072823930914382
0.95970873807294854174
0.93231183304900866471
0.90569703031831050311
0.87984200312545701728
0.85472506207925702526
0.83032513695782228513
0.80662175903307720137
0.78359504389985235040
0.76122567479515790279
0.73949488639364380216
0.71838444906565113168
0.69787665358465278409
0.67795429627125058936
0.65860066456126842294
0.63979952298583642190
0.62153509955170005430
0.60379207251033473192
0.58655555750476218169
0.56981109508328886548
0.55354463856969038371
0.53774254227966766795
0.52239155007368842654
0.50747878423661241243
0.49299173467477114263
0.47891824842143931873
0.46524651944189504560
0.45196507872951574569
0.43906278468460230302
0.42652881376785911627
0.41435265142069133137
0.40252408324470018153
0.39103318643297885204
0.37987032144602006500
0.36902612392525202534
0.35849149683741954320
0.34825760284322077043
0.33831585688379711696
0.32865791897885565653
0.31927568723038846077
0.31016129102611089685
0.30130708443692483245
0.29270563980286418149
0.28434974150214348265
0.27623237989808152593
0.26834674545882375440
0.26068622304492872210
0.25324438636002749581
0.24601499255990122439
0.23899197701545324413
0.23216944822518362224
0.22554168287289777517
0.21910312102650283950
0.21284836147386484995
0.20677215719181374354
0.20086941094449478618
0.19513517100737465260
0.18956462701331450171
0.18415310591722588995
0.17889606807592378646
0.17378910343988873688
0.16882792785374295397
0.16400837946233715048
0.15932641521943327612
0.15477810749605416807
0.15035964078565494662
0.14606730850335244987
0.14189750987652710590
0.13784674692418930064
0.13391162152257601869
0.13008883255451628158
0.12637517314017385206
0.12276752794684424319
0.11926287057554925408
0.11585826102223663325
0.11255084321145517046
0.10933784260043626080
0.10621656385157177138
0.10318438857133632736
0.10023877311375638255
0.09737724644658438122
0.09459740807838659671
0.09189692604480793892
0.08927353495232186187
0.08672503407782609919
0.08424928552248935054
0.08184421241830032445
0.07950779718581456323
0.07723807984163751084
0.07503315635422422303
0.07289117704661593478
0.07081034504477422276
0.06878891477021040202
0.06682519047564625114
0.06491752482247721556
0.06306431749884494620
0.06126401387715996877
0.05951510370994807231
0.05781611986292651412
0.05616563708424734264
0.05456227080887512265
0.05300467599709629551
0.05149154600618567612
0.05002161149428371173
0.04859363935556475916
0.04720643168580318516
0.04585882477746977548
0.04454968814351494694
0.04327792356902042392
0.04204246418992321072
0.04084227359803953294
0.03967634497163765456
0.03854370023083047297
0.03744338921707891787
0.03637448889611846758
0.03533610258363958923
0.03432735919307292050
0.03334741250484780928
0.03239544045651161081
0.03147064445311386488
0.03057224869727716288
0.02969949953839235227
0.02885166484039254284
0.02802803336757511699
0.02722791418795698221
0.02645063609366215054
0.02569554703785554423
0.02496201358775081494
0.02424942039323315160
0.02355716967065142609
0.02288468070134643331
0.02223138934449487431
0.02159674756386010738
0.02098022296805289108
0.02038129836391623997
0.01979947132265994988
0.01923425375838066012
0.01868517151861400286
0.01815176398657529153
0.01763358369475492501
0.01713019594954492270
0.01664117846658073191
0.01616612101649354122
0.01570462508077481723
0.01525630351746541657
0.01482078023638781251
0.01439768988364981822
0.01398667753515487472
0.01358739839886133859
0.01319951752554190602
0.01282270952779955044
0.01245665830710515447
0.01210105678862704974
0.01175560666363078578
0.01142001813923223565
0.01109400969529492076
0.01077730784826685592
0.01046964692175951159
0.01017076882367572155
0.00988042282970030480
0.00959836537297107176
0.00932435983975442480
0.00905817637095351902
0.00879959166928308625
0.00854838881194858700
0.00830435706867310199
0.00806729172491874209
0.00783699391015485469
0.00761327043102842400
0.00739593360929721114
0.00718480112438918666
0.00697969586045668351
0.00678044575779648481
0.00658688366851164445
0.00639884721629353000
0.00621617866020691447
0.00603872476236339256
0.00586633665937249821
0.00569886973746241022
0.00553618351116571140
0.00537814150546815986
0.00522461114132197636
0.00507546362442717718
0.00493057383718808161
0.00478982023375397557
0.00465308473805618999
0.00452025264475583183
0.00439121252301926269
0.00426585612304039401
0.00414407828523159424
0.00402577685200693463
0.00391085258208366711
0.00379920906723028168
0.00369075265139102993
0.00358539235211935252
0.00348303978425400533
0.00338360908577415480
0.00328701684577097000
0.00319318203447551329
0.00310202593528406201
0.00301347207872397754
0.00292744617830457011
0.00284387606819934587
0.00276269164270712521
0.00268382479744148916
0.00260720937219899133
0.00253278109545839640
0.00246047753046425106
0.00239023802284966036
0.00232200364975421918
0.00225571717039456214
0.00219132297804588809
0.00212876705339436548
0.00206799691922111058
0.00200896159637986614
0.00195161156103134900
0.00189589870309847465
0.00184177628590750627
0.00178919890698140695
0.00173812245995234741
0.00168850409756157900
0.00164030219571548804
0.00159347631856778947
0.00154798718459849731
0.00150379663366126556
0.00146086759497139553
0.00141916405600774520
0.00137865103230233881
0.00133929453809245470
0.00130106155781046281
0.00126392001838756683
0.00122783876234820928
0.00119278752167250950
0.00115873689240490567
0.00112565830998760186
0.00109352402529820452
0.00106230708137139461
0.00103198129078515004
0.00100252121369249375
0.00097390213648041466
0.00094610005103796754
0.00091909163461625411
0.00089285423026330398
0.00086736582781751228
0.00084260504544363948
0.00081855111169592339
0.00079518384809321369
0.00077248365219156521
0.00075043148114002818
0.00072900883570590407
0.00070819774475600625
0.00068798075018095678
0.00066834089224983653
0.00064926169538293119
0.00063072715433060513
0.00061272172074675350
0.00059523029014551566
0.00057823818923036382
0.00056173116358488586
0.00054569536571497806
0.00053011734343238678
0.00051498402856987716
0.00050028272601853685
0.00048600110307805142
0.00047212717911097819
0.00045864931549238026
0.00044555620584635266
0.00043283686656127941
0.00042048062757584447
0.00040847712342808299
0.00039681628455994600
0.00038548832887010765
0.00037448375350790164
0.00036379332690152734
0.00035340808101382536
0.00034331930381912082
0.00033351853199484449
0.00032399754382177187
0.00031474835228695439
0.00030576319838352924
0.00029703454460180994
0.00028855506860618060
0.00028031765709250246
0.00027231539982086638
0.00026454158381870234
0.00025698968774936278
0.00024965337644147724
0.00024252649557446860
0.00023560306651578943
0.00022887728130553569
0.00022234349778423946
0.00021599623485974305
0.00020983016790919820
0.00020384012431231589
0.00019802107911213762
0.00019236815079967187
0.00018687659721887198
0.00018154181158851174
0.00017635931863762839
0.00017132477085128240
0.00016643394482349666
0.00016168273771430120
0.00015706716380792661
0.00015258335116924421
0.00014822753839566037
0.00014399607146173128
0.00013988540065385807
0.00013589207759248320
0.00013201275233930003
0.00012824417058703727
0.00012458317092947264
0.00012102668220937439
0.00011757172094215637
0.00011421538881307586
0.00011095487024588292
0.00010778743004087489
0.00010471041108037850
0.00010172123209973579
0.00009881738552191826
0.00009599643535395989
0.00009325601514343841
0.00009059382599329479
0.00008800763463332296
0.00008549527154671382
0.00008305462915007940
0.00008068366002543428
0.00007838037520264594
0.00007614284249091982
0.00007396918485791192
0.00007185757885511613
0.00006980625308819961
0.00006781348673100824
0.00006587760808198995
0.00006399699316183133
0.00006217006435112458
0.00006039528906692736
0.00005867117847710152
0.00005699628625135462
0.00005536920734793525
0.00005378857683496510
0.00005225306874541754
0.00005076139496478486
0.00004931230415049735
0.00004790458068219223
0.00004653704364194703
0.00004520854582362620
0.00004391797277050659
0.00004266424184037725
0.00004144630129732634
0.00004026312942945688
0.00003911373369178711
0.00003799714987362030
0.00003691244128968237
0.00003585869799435114
0.00003483503601831654
0.00003384059662703241
0.00003287454560033661
0.00003193607253263691
0.00003102439015307334
0.00003013873366508914
0.00002927836010485436
0.00002844254771800448
0.00002763059535417203
0.00002684182187880157
0.00002607556560175689
0.00002533118372223859
0.00002460805178954863
0.00002390556317924779
0.00002322312858426770
0.00002256017552055016
0.00002191614784679894
0.00002129050529794079
0.00002068272303190597
0.00002009229118934569
0.00001951871446591904
0.00001896151169678939
0.00001842021545298276
0.00001789437164926870
0.00001738353916323501
0.00001688728946523663
0.00001640520625890897
0.00001593688513194291
0.00001548193321682965
0.00001503996886128969
0.00001461062130811105
0.00001419353038412629
0.00001378834619806890
0.00001339472884705443
0.00001301234813144163
0.00001264088327783261
0.00001228002266998105
0.00001192946358738184
0.00001158891195132367
0.00001125808207819075
0.00001093669643980716
0.00001062448543062252
0.00001032118714154423
0.00001002654714022571
0.00000974031825762706
0.00000946226038066848
0.00000919214025080334
0.00000892973126834098
0.00000867481330235549
0.00000842717250602152
0.00000818660113722120
0.00000795289738427250
0.00000772586519663236
0.00000750531412043302
0.00000729105913871302
0.00000708292051620935
0.00000688072364858016
0.00000668429891593195
0.00000649348154052789
0.00000630811144855838
0.00000612803313585737
0.00000595309553745251
0.00000578315190083884
0.00000561805966287045
0.00000545768033016629
0.00000530187936293030
0.00000515052606208794
0.00000500349345964475
0.00000486065821217472
0.00000472190049734951
0.00000458710391342120
0.00000445615538157468
0.00000432894505106746
0.00000420536620707767
0.00000408531518118252
0.00000396869126439247
0.00000385539662266791
0.00000374533621484778
0.00000363841771292088
0.00000353455142457338
0.00000343365021794718
0.00000333562944854643
0.00000324040688823049
0.00000314790265623399
0.00000305803915215605
0.00000297074099086251
0.00000288593493924646
0.00000280354985479411
0.00000272351662590437
0.00000264576811391223
0.00000257023909676713
0.00000249686621431913
0.00000242558791516709
0.00000235634440502412
0.00000228907759655704
0.00000222373106065780
0.00000216024997910595
0.00000209858109858250
0.00000203867268599647
0.00000198047448508678
0.00000192393767426310
0.00000186901482565009
0.00000181565986530089
0.00000176382803454637
0.00000171347585244781
0.00000166456107932134
0.00000161704268130375
0.00000157088079592976
0.00000152603669869205
0.00000148247277055583
0.00000144015246640080
0.00000139904028436398
0.00000135910173605781
0.00000132030331763826
0.00000128261248169906
0.00000124599760996809
0.00000121042798678336
0.00000117587377332604
0.00000114230598258919
0.00000110969645506096
0.00000107801783510200
0.00000104724354799724
0.00000101734777766277
0.00000098830544498910
0.00000096009218680269
0.00000093268433542803
0.00000090605889883323
0.00000088019354134230
0.00000085506656489811
0.00000083065689086024
0.00000080694404232238
0.00000078390812693462
0.00000076152982021602
0.00000073979034934358
0.00000071867147740407
0.00000069815548809529
0.00000067822517086415
0.00000065886380646903
0.00000064005515295423
0.00000062178343202483
0.00000060403331581056
0.00000058678991400744
0.00000057003876138655
0.00000055376580565934
0.00000053795739568944
0.00000052260027004086
0.00000050768154585320
0.00000049318870803443
0.00000047910959876214
0.00000046543240728455
0.00000045214566001262
0.00000043923821089506
0.00000042669923206807
0.00000041451820477198
0.00000040268491052728
0.00000039118942256242
0.00000038002209748644
0.00000036917356719928
0.00000035863473103300
0.00000034839674811734
0.00000033845102996332
0.00000032878923325844
0.00000031940325286760
0.00000031028521503382
0.00000030142747077312
0.00000029282258945781
0.00000028446335258315
0.00000027634274771176
0.00000026845396259106
0.00000026079037943855
0.00000025334556939027
0.00000024611328710767
0.00000023908746553855
0.00000023226221082750
0.00000022563179737157
0.00000021919066301722
0.00000021293340439428
0.00000020685477238315
0.00000020094966771138
0.00000019521313667600
0.00000018964036698790
0.00000018422668373489
0.00000017896754545999
0.00000017385854035164
0.00000016889538254277
0.00000016407390851535
0.00000015939007360776
0.00000015483994862176
0.00000015041971652632
0.00000014612566925561
0.00000014195420459833
0.00000013790182317588
0.00000013396512550679
0.00000013014080915493
0.00000012642566595918
0.00000012281657934210
0.00000011931052169553
0.00000011590455184075
0.00000011259581256116
0.00000010938152820545
0.00000010625900235908
0.00000010322561558236
0.00000010027882321302
0.00000009741615323150
0.00000009463520418727
0.00000009193364318425
0.00000008930920392377
0.00000008675968480344
0.00000008428294707024
0.00000008187691302635
0.00000007953956428621
0.00000007726894008332
0.00000007506313562538
0.00000007292030049641
0.00000007083863710442
0.00000006881639917349
0.00000006685189027881
0.00000006494346242359
0.00000006308951465656
0.00000006128849172900
0.00000005953888279001
0.00000005783922011912
0.00000005618807789503
0.00000005458407099950
0.00000005302585385541
0.00000005151211929798
0.00000005004159747818
0.00000004861305479751
0.00000004722529287311
0.00000004587714753250
0.00000004456748783695
0.00000004329521513276
0.00000004205926212960
0.00000004085859200519
0.00000003969219753552
0.00000003855910024993
0.00000003745834961023
0.00000003638902221337
0.00000003535022101678
0.00000003434107458583
0.00000003336073636287
0.00000003240838395697
0.00000003148321845412
0.00000003058446374697
0.00000002971136588379
0.00000002886319243600
0.00000002803923188371
0.00000002723879301889
0.00000002646120436548
0.00000002570581361612
0.00000002497198708494
0.00000002425910917596
0.00000002356658186669
0.00000002289382420645
0.00000002224027182901
0.00000002160537647917
0.00000002098860555282
0.00000002038944165016
0.00000001980738214167
0.00000001924193874642
0.00000001869263712250
0.00000001815901646909
0.00000001764062913990
0.00000001713704026763
0.00000001664782739921
0.00000001617258014135
0.00000001571089981633
0.00000001526239912749
0.00000001482670183440
0.00000001440344243719
0.00000001399226586995
0.00000001359282720288
0.00000001320479135293
0.00000001282783280269
0.00000001246163532734
0.00000001210589172934
0.00000001176030358079
0.00000001142458097301
0.00000001109844227339
0.00000001078161388909
0.00000001047383003759
0.00000001017483252366
0.00000000988437052282
0.00000000960220037089
0.00000000932808535959
0.00000000906179553798
0.00000000880310751958
0.00000000855180429490
0.00000000830767504948
0.00000000807051498698
0.00000000784012515742
0.00000000761631229025
0.00000000739888863225
0.00000000718767178999
0.00000000698248457687
0.00000000678315486443
0.00000000658951543800
0.00000000640140385639
0.00000000621866231563
0.00000000604113751662
0.00000000586868053648
0.00000000570114670367
0.00000000553839547658
0.00000000538029032567
0.00000000522669861893
0.00000000507749151060
0.00000000493254383308
0.00000000479173399197
0.00000000465494386402
0.00000000452205869806
0.00000000439296701873
0.00000000426756053298
0.00000000414573403920
0.00000000402738533900
0.00000000391241515143
0.00000000380072702975
0.00000000369222728047
0.00000000358682488481
0.00000000348443142229
0.00000000338496099657
0.00000000328833016343
0.00000000319445786072
0.00000000310326534038
0.00000000301467610240
0.00000000292861583059
0.00000000284501233030
0.00000000276379546781
0.00000000268489711154
0.00000000260825107483
0.00000000253379306050
0.00000000246146060684
0.00000000239119303524
0.00000000232293139930
0.00000000225661843538
0.00000000219219851453
0.00000000212961759585
0.00000000206882318115
0.00000000200976427092
0.00000000195239132154
0.00000000189665620370
0.00000000184251216206
0.00000000178991377600
0.00000000173881692154
0.00000000168917873428
0.00000000164095757351
0.00000000159411298722
0.00000000154860567821
0.00000000150439747107
0.00000000146145128021
0.00000000141973107872
0.00000000137920186816
0.00000000133982964918
0.00000000130158139303
0.00000000126442501382
0.00000000122832934162
0.00000000119326409633
0.00000000115919986223
0.00000000112610806337
0.00000000109396093952
0.00000000106273152296
0.00000000103239361580
0.00000000100292176802
0.00000000097429125614
0.00000000094647806246
0.00000000091945885490
0.00000000089321096748
0.00000000086771238122
0.00000000084294170575
0.00000000081887816132
0.00000000079550156140
0.00000000077279229570
0.00000000075073131377
0.00000000072930010899
0.00000000070848070303
0.00000000068825563081
0.00000000066860792584
0.00000000064952110593
0.00000000063097915946
0.00000000061296653186
0.00000000059546811261
0.00000000057846922255
0.00000000056195560158
0.00000000054591339665
0.00000000053032915022
0.00000000051518978888
0.00000000050048261247
0.00000000048619528335
0.00000000047231581610
0.00000000045883256744
0.00000000044573422648
0.00000000043300980522
0.00000000042064862934
0.00000000040864032923
0.00000000039697483131
0.00000000038564234957
0.00000000037463337736
0.00000000036393867943
0.00000000035354928415
0.00000000034345647601
0.00000000033365178832
0.00000000032412699606
0.00000000031487410904
0.00000000030588536515
0.00000000029715322386
0.00000000028867035991
0.00000000028042965717
0.00000000027242420262
0.00000000026464728061
0.00000000025709236720
0.00000000024975312469
0.00000000024262339630
0.00000000023569720101
0.00000000022896872853
0.00000000022243233446
0.00000000021608253550
0.00000000020991400492
0.00000000020392156802
0.00000000019810019784
0.00000000019244501091
0.00000000018695126320
0.00000000018161434607
0.00000000017642978247
0.00000000017139322315
0.00000000016650044300
0.00000000016174733756
0.00000000015712991952
0.00000000015264431539
0.00000000014828676226
0.00000000014405360466
0.00000000013994129144
0.00000000013594637286
0.00000000013206549764
0.00000000012829541016
0.00000000012463294776
0.00000000012107503805
0.00000000011761869637
0.00000000011426102323
0.00000000011099920193
0.00000000010783049618
0.00000000010475224781
0.00000000010176187451
0.00000000009885686771
0.00000000009603479044
0.00000000009329327530
0.00000000009063002248
0.00000000008804279782
0.00000000008552943092
0.00000000008308781338
0.00000000008071589694
0.00000000000000000000
57.90227301966957185186
111.58675801397740201537
161.28388292943316173478
207.21288563677674687824
249.58232338169929676042
288.59055996954577949509
324.42623163012336817701
357.26869246935979163027
387.28844037678396716728
414.64752422158534272967
439.49993313526925931001
461.99196864562128439502
482.26260039474777840951
500.44380614333471157806
516.66089673389467407105
531.03282665761059888609
543.67249084238164869021
554.68700825378755325801
564.17799287585830825265
572.24181261474222992547
578.96983664554011284054
584.44867170069733219862
588.76038777737562668335
591.98273372111179924104
594.18934312380326900893
595.44993095557015294617
595.83048133234649412771
595.39342680405707142199
594.19781953196900303737
592.29949470820804435789
589.75122655546806527127
586.60287723061946962844
582.90153894217633023800
578.69166957842503506981
574.01522213039061171003
568.91176818173414631019
563.41861572607842845173
557.57092156115618308831
551.40179849853632276790
544.94241761748151020583
538.22210578172280293074
531.26843862857060685201
524.10732923081422995892
516.76311262326396445133
509.25862637755460582412
501.61528740094257727833
493.85316512726535620459
485.99105126099681228879
478.04652622838722209053
470.03602248304184740846
461.97488480691680479140
453.87742774162182968212
445.75699027907415938898
437.62598793495885729499
429.49596232308778098741
421.37762834362843022973
413.28091909324643893342
405.21502860051577954437
397.18845248543061643431
389.20902663754662853535
381.28396400314511538454
373.41988956785462505650
365.62287361738333402172
357.89846335538032917611
350.25171295397802850857
342.68721210924468323356
335.20911317058562417515
327.82115691009653346555
320.52669699494924770988
313.32872322309998480705
306.22988357994239549953
299.23250517096840894737
292.33861408305108398054
285.54995422462610576986
278.86800519280632215668
272.29399921331526002177
265.82893719708107482802
259.47360395536202304356
253.22858261339999330630
247.09426826080124328655
241.07088087512184415573
235.15847755349403769287
229.35696408555318726030
223.66610589942177966805
218.08553841106692061658
212.61477680597226935788
207.25322528074667616238
202.00018577103352868107
196.85486619088268867017
191.81638820759138752692
186.88379457492467849988
182.05605604656892637649
177.33207789066844384251
172.71070602533370674792
168.19073279408746657282
163.77090239933829707297
159.44991601113216006524
155.22643656762511454872
151.09909328296006947312
147.06648587748901491068
143.12718854459021144976
139.27975366765261355795
135.52271530016670908481
131.85459242124531442641
128.27389197831718092857
124.77911172817776730426
121.36874288704927948856
118.04127259979283337543
114.79518623793252629639
111.62896953568380808974
108.54111057274025142760
105.53010161214517381723
102.59444080117665976104
99.73263374278458570643
96.94319494475406884249
94.22464915341606683796
91.57553257839450111533
88.99439401455708775757
86.47979586703192467212
84.03031508486598966101
81.64454400861635008368
79.32109113690844992561
77.05858181673789886190
74.85565886205463925762
72.71098310493682959077
70.62323388344560726182
68.59110947004123204351
66.61332744424262841676
64.68862501302476175624
62.81575928226552463229
60.99350748238281028080
59.22066715113931678616
57.49605627643528293902
55.81851340176097409085
54.18689769684043255893
52.60008899586136266180
51.05698780555862725805
49.55651528529725879935
48.09761320118308702831
46.67924385611987503353
45.30038999762566476193
43.96005470512158552765
42.65726125830997972344
41.39105298816967604125
40.16049311200900007179
38.96466455393491656878
37.80266975202023616021
36.67363045337572913240
35.57668749826349596788
34.51100059432254596459
33.47574808191251349854
32.47012669152262986927
31.49335129413438494339
30.54465464537383923016
29.62328712423669685450
28.72851646712064521694
27.85962749785388936630
27.01592185436409820909
26.19671771259038806079
25.40134950820223380674
24.62916765665087837078
23.87953827204409762430
23.15184288530126366368
22.44547816201421852611
21.75985562040891707625
21.09440134977523229054
20.44855572970466894844
19.82177315045056076315
19.21352173470172175485
18.62328306103738384536
18.05055188930986886930
17.49483588818173274149
16.95565536502461156942
16.43254299836890552911
15.92504357307728213300
15.43271371839805361503
14.95512164904027763157
14.49184690939762631956
14.04248012103545129037
13.60662273354249762747
13.18388677883700665916
12.77389462900635308529
12.37627875774857422186
11.99068150547461897304
11.61675484812123926304
11.25416016971579935557
10.90256803872622803908
10.56165798822232382292
10.23111829986733667397
9.91064579175237447828
9.59994561008040570016
9.29873102470078727322
9.00672322849022144453
8.72365114057106083578
8.44925121335380424625
8.18326724338601607656
7.92545018598650941044
7.67555797363986069826
7.43335533812338411508
7.19861363633544737439
6.97111067979156562302
6.75063056775204373139
6.53696352394292468091
6.32990573682980350867
6.12925920340224994476
5.93483157642509873142
5.74643601511124479941
5.56389103916929528282
5.38702038617840184287
5.21565287224151230561
5.04962225586734447802
4.88876710503086275850
4.73293066736120771054
4.58196074340562464755
4.43570956291754736611
4.29403366411666542746
4.15679377586858045390
4.02385470273152812126
3.89508521281767094990
3.77035792841635819528
3.64954921932699960507
3.53253909884914607531
3.41921112237785607135
3.30945228855245066057
3.20315294290719920767
3.10020668397282905815
3.00051027177812201785
2.90396353870136980646
2.81046930262181282600
2.71993328232187758786
2.63226401509140073287
2.54737277648568527511
2.46517350218978537058
2.38558271194207138777
2.30851943547065685536
2.23390514039704157767
2.16166366206192028798
2.09172113522871772062
2.02400592762123610058
1.95844857525233528861
1.89498171950141358622
1.83354004589904651112
1.77406022457791356928
1.71648085234982894498
1.66074239636943254972
1.60678713934580241762
1.55455912626393066844
1.50400411257881372329
1.45506951384551741491
1.40770435674935812109
1.36185923150102428103
1.31748624556217808212
1.27453897866774723546
1.23297243911187259791
1.19274302126509823552
1.15380846429111594276
1.11612781203203548230
1.07966137403183881638
1.04437068766829055377
1.01021848136430625331
0.97716863885034987991
0.94518616445011471860
0.91423714936235112027
0.88428873891232961935
0.85530910074704402657
0.82726739394882842227
0.80013373904270868042
0.77387918887333584372
0.74847570032795118777
0.72389610688238947844
0.70011409194768103870
0.67710416299533671136
0.65484162643997578801
0.63330256325843403697
0.61246380532502942007
0.59230291244316213284
0.57279815005391432337
0.55392846760280967100
0.53567347754634297985
0.51801343498040475222
0.50092921787311650572
0.48440230788509242021
0.46841477176055673626
0.45294924327316499202
0.43798890571082643719
0.42351747488419883014
0.40951918264395181790
0.39597876089227568297
0.38288142607450226240
0.37021286413706439022
0.35795921593840895891
0.34610706309981548179
0.33464341428342903040
0.32355569188516025703
0.31283171913043406054
0.30245970756108997435
0.29242824490206748012
0.28272628329680388193
0.27334312790058495901
0.26426842582137854976
0.25549215539797170971
0.24700461580551308360
0.23879641697882716955
0.23085846984415184235
0.22318197685019189325
0.21575842278964604826
0.20857956590260920415
0.20163742925349401047
0.19492429237334510383
0.18843268315965858162
0.18215537002603190975
0.17608535429419205909
0.17021586282116035749
0.16454034085451754721
0.15905244510893568055
0.15374603705733216885
0.14861517643020288881
0.14365411491686419510
0.13885729006252192641
0.13421931935525766022
0.12973499449719386178
0.12539927585426538514
0.12120728707918707046
0.11715430990236286313
0.11323577908563686734
0.10944727753393472536
0.10578453155998542023
0.10224340629746141162
0.09881990125800386993
0.09551014602773820472
0.09231039609901220411
0.08921702883321630528
0.08622653955066475473
0.08333553774364024780
0.08054074340881584027
0.07783898349538238837
0.07522718846531620263
0.07270238896233517656
0.07026171258618196802
0.06790238076898744146
0.06562170575055155386
0.06341708764948594812
0.06128601162724105211
0.05922604514214319105
0.05723483529064312542
0.05531010623306612667
0.05344965670123843354
0.05165135758543547978
0.04991314959818581032
0.04823304101252816334
0.04660910547240093571
0.04503947987290805866
0.04352236230827705166
0.04205601008538834007
0.04063873780082467163
0.03926891547944503374
0.03794496677255526640
0.03666536721380182079
0.03542864253097494087
0.03423336701196080106
0.03307816192314053105
0.03196169397857943212
0.03088267385840884685
0.02983985477484431964
0.02883203108433839146
0.02785803694440725994
0.02691674501372067624
0.02600706519408247167
0.02512794341297766576
0.02427836044539734284
0.02345733077369713260
0.02266390148428010579
0.02189715119993588047
0.02115618904670005240
0.02044015365413799634
0.01974821218798664124
0.01907955941412504616
0.01843341679287353527
0.01780903160265524462
0.01720567609208100562
0.01662264665955145646
0.01605926305949497215
0.01551486763439074816
0.01498882457175108353
0.01448051918526378594
0.01398935721931993115
0.01351476417617799089
0.01305618466503722340
0.01261308177231692390
0.01218493645246120083
0.01177124693860808098
0.01137152817248553681
0.01098531125291441791
0.01061214290231999972
0.01025158495067150614
0.00990321383628801725
0.00956662012296632773
0.00924140803290476529
0.00892719499491188492
0.00862361120740727516
0.00833029921573536468
0.00804691350333004360
0.00777312009628126563
0.00750859618087037356
0.00725302973365325211
0.00700611916368544703
0.00676757296649474916
0.00653710938942074753
0.00631445610795181283
0.00609934991270294578
0.00589153640668806187
0.00569076971255275121
0.00549681218944291818
0.00530943415919626731
0.00512841364155267390
0.00495353609809016243
0.00478459418460159061
0.00462138751163745747
0.00446372241294792742
0.00431141172156675537
0.00416427455328725188
0.00402213609728923824
0.00388482741368289912
0.00375218523774384968
0.00362405179062019354
0.00350027459630009204
0.00338070630463477902
0.00326520452021872602
0.00315363163693518347
0.00304585467798120391
0.00294174514119269854
0.00284117884949553184
0.00274403580631450445
0.00265020005577739585
0.00255955954755666569
0.00247200600619636472
0.00238743480477686832
0.00230574484277478071
0.00222683842798000915
0.00215062116233649334
0.00207700183157745683
0.00200589229853006829
0.00193720739996891284
0.00187086484690090083
0.00180678512816891991
0.00174489141726436644
0.00168510948224296036
0.00162736759864127328
0.00157159646529492084
0.00151772912296257393
0.00146570087566307125
0.00141544921463594860
0.00136691374483863888
0.00132003611389642475
0.00127475994342401695
0.00123103076264014714
0.00118879594419944224
0.00114800464216787529
0.00110860773207103417
0.00107055775294626022
0.00103380885133238457
0.00099831672713270492
0.00096403858128907684
0.00093093306520700050
0.00089896023187357272
0.00086808148861206730
0.00083825955141880271
0.00080945840082963455
0.00078164323926535389
0.00075478044980664476
0.00072883755635120358
0.00070378318510692906
0.00067958702737671716
0.00065621980359193896
0.00063365322855287961
0.00061185997783607142
0.00059081365532950500
0.00057048876185821168
0.00055086066486381040
0.00053190556910288032
0.00051360048833016007
0.00049592321793370895
0.00047885230849024744
0.00046236704020994907
0.00044644739824097057
0.00043107404880500657
0.00041622831613605737
0.00040189216019562553
0.00038804815513828519
0.00037467946850262222
0.00036176984110318695
0.00034930356760006073
0.00033726547772332011
0.00032564091813047728
0.00031441573487569536
0.00030357625647028068
0.00029310927751463541
0.00028300204288252227
0.00027324223243909964
0.00026381794627486647
0.00025471769043815419
0.00024593036314949507
0.00023744524148164095
0.00022925196848963577
0.00022134054077581098
0.00021370129647509806
0.00020632490364653873
0.00019920234905733940
0.00019232492734627590
0.00018568423055369664
0.00017927213800578241
0.00017308080654117254
0.00016710266106840146
0.00016133038544304844
0.00015575691365381469
0.00015037542130712778
0.00014517931740023839
0.00014016223637306093
0.00013531803042939858
0.00013064076211844483
0.00012612469716780902
0.00012176429755957440
0.00011755421484119545
0.00011348928366331348
0.00010956451553683300
0.00010577509280186073
0.00010211636280135509
0.00009858383225257496
0.00009517316180965045
0.00009188016081081263
0.00008870078220405827
0.00008563111764520081
0.00008266739276250191
0.00007980596258223378
0.00007704330710974399
0.00007437602706075745
0.00007180083973783516
0.00006931457504707878
0.00006691417165033491
0.00006459667324831233
0.00006235922499018258
0.00006019907000537512
0.00005811354605343914
0.00005610008228795901
0.00005415619613067320
0.00005227949025204990
0.00005046764965471966
0.00004871843885627373
0.00004702969916806029
0.00004539934606672256
0.00004382536665533313
0.00004230581721108463
0.00004083882081659962
0.00003942256507202165
0.00003805529988514598
0.00003673533533693777
0.00003546103961988215
0.00003423083704668789
0.00003304320612695718
0.00003189667770951227
0.00003078983318814515
0.00002972130276863935
0.00002868976379497450
0.00002769393913270805
0.00002673259560758363
0.00002580454249749185
0.00002490863007596630
0.00002404374820546189
0.00002320882497872125
0.00002240282540659224
0.00002162475015071536
0.00002087363429955353
0.00002014854618628662
0.00001944858624714804
0.00001877288591882117
0.00001812060657356943
0.00001749093849080999
0.00001688309986389190
0.00001629633584087692
0.00001572991759816433
0.00001518314144583955
0.00001465532796366450
0.00001414582116666458
0.00001365398769930270
0.00001317921605726377
0.00001272091583590951
0.00001227851700449038
0.00001185146920523822
0.00001143924107648746
0.00001104131959900614
0.00001065720946474311
0.00001028643246722585
0.00000992852691286927
0.00000958304705248077
0.00000924956253227142
0.00000892765786370655
0.00000861693191155152
0.00000831699739949075
0.00000802748043271861
0.00000774802003692247
0.00000747826771309628
0.00000721788700764370
0.00000696655309724743
0.00000672395238799899
0.00000648978212830186
0.00000626375003507508
0.00000604557393280337
0.00000583498140499263
0.00000563170945760685
0.00000543550419407552
0.00000524612050147542
0.00000506332174750384
0.00000488687948787336
0.00000471657318377121
0.00000455218992903814
0.00000439352418673334
0.00000424037753476428
0.00000409255842026966
0.00000394988192245632
0.00000381216952359921
0.00000367924888792498
0.00000355095364810852
0.00000342712319912114
0.00000330760249917823
0.00000319224187754262
0.00000308089684894833
0.00000297342793441743
0.00000286970048825046
0.00000276958453097847
0.00000267295458807172
0.00000257968953420768
0.00000248967244290681
0.00000240279044135228
0.00000231893457021495
0.00000223799964831192
0.00000215988414193245
0.00000208449003867071
0.00000201172272561046
0.00000194149087171206
0.00000187370631425722
0.00000180828394921198
0.00000174514162537310
0.00000168420004216772
0.00000162538265098063
0.00000156861555988766
0.00000151382744167812
0.00000146094944505285
0.00000140991510888889
0.00000136066027946484
0.00000131312303054529
0.00000126724358622558
0.00000122296424644206
0.00000118022931505587
0.00000113898503042170
0.00000109917949835584
0.00000106076262742093
0.00000102368606644743
0.00000098790314421497
0.00000095336881121881
0.00000092003958344989
0.00000088787348811868
0.00000085683001125615
0.00000082687004712685
0.00000079795584939186
0.00000077005098396097
0.00000074312028347609
0.00000071712980336945
0.00000069204677944227
0.00000066783958691153
0.00000064447770087406
0.00000062193165813909
0.00000060017302038199
0.00000057917433857365
0.00000055890911864143
0.00000053935178831909
0.00000052047766514471
0.00000050226292556697
0.00000048468457512148
0.00000046772041964009
0.00000045134903745775
0.00000043554975258212
0.00000042030260879303
0.00000040558834463926
0.00000039138836930200
0.00000037768473929474
0.00000036446013597090
0.00000035169784381105
0.00000033938172946304
0.00000032749622150867
0.00000031602629093212
0.00000030495743226557
0.00000029427564538881
0.00000028396741796007
0.00000027401970845630
0.00000026441992980180
0.00000025515593356481
0.00000024621599470248
0.00000023758879683516
0.00000022926341803170
0.00000022122931708813
0.00000021347632028255
0.00000020599460858986
0.00000019877470534025
0.00000019180746430619
0.00000018508405820314
0.00000017859596758943
0.00000017233497015170
0.00000016629313036247
0.00000016046278949687
0.00000015483655599622
0.00000014940729616633
0.00000014416812519897
0.00000013911239850530
0.00000013423370335046
0.00000012952585077882
0.00000012498286781993
0.00000012059898996529
0.00000011636865390667
0.00000011228649052685
0.00000010834731813403
0.00000010454613593146
0.00000010087811771421
0.00000009733860578498
0.00000009392310508166
0.00000009062727750900
0.00000008744693646752
0.00000008437804157268
0.00000008141669355779
0.00000007855912935426
0.00000007580171734292
0.00000007314095277077
0.00000007057345332702
0.00000006809595487320
0.00000006570530732189
0.00000006339847065880
0.00000006117251110346
0.00000005902459740344
0.00000005695199725762
0.00000005495207386407
0.00000005302228258802
0.00000005116016774594
0.00000004936335950157
0.00000004762957087010
0.00000004595659482664
0.00000004434230151547
0.00000004278463555647
0.00000004128161344540
0.00000003983132104479
0.00000003843191116217
0.00000003708160121281
0.00000003577867096379
0.00000003452146035681
0.00000003330836740677
0.00000003213784617368
0.00000003100840480525
0.00000002991860364771
0.00000002886705342244
0.00000002785241346632
0.00000002687339003328
0.00000002592873465515
0.00000002501724255970
0.00000002413775114382
0.00000002328913849991
0.00000002247032199378
0.00000002168025689206
0.00000002091793503754
0.00000002018238357072
0.00000001947266369597
0.00000001878786949075
0.00000001812712675633
0.00000001748959190871
0.00000001687445090818
0.00000001628091822624
0.00000001570823584865
0.00000001515567231319
0.00000001462252178108
0.00000001410810314077
0.00000001361175914309
0.00000001313285556652
0.00000001267078041166
0.00000001222494312379
0.00000001179477384266
0.00000001137972267839
0.00000001097925901268
0.00000001059287082454
0.00000001022006403937
0.00000000986036190101
0.00000000951330436554
0.00000000917844751636
0.00000000885536299972
0.00000000854363747988
0.00000000824287211343
0.00000000795268204192
0.00000000767269590219
0.00000000740255535389
0.00000000714191462349
0.00000000689044006419
0.00000000664780973129
0.00000000641371297233
0.00000000618785003160
0.00000000596993166851
0.00000000575967878925
0.00000000555682209132
0.00000000536110172060
0.00000000517226694027
0.00000000499007581142
0.00000000481429488478
0.00000000464469890324
0.00000000448107051480
0.00000000432319999556
0.00000000417088498235
0.00000000402393021477
0.00000000388214728627
0.00000000374535440389
0.00000000361337615642
0.00000000348604329073
0.00000000336319249584
0.00000000324466619460
0.00000000313031234270
0.00000000301998423462
0.00000000291354031645
0.00000000281084400525
0.00000000271176351469
0.00000000261617168688
0.00000000252394582998
0.00000000243496756163
0.00000000234912265771
0.00000000226630090655
0.00000000218639596812
0.00000000210930523822
0.00000000203492971745
0.00000000196317388466
0.00000000189394557500
0.00000000182715586205
0.00000000176271894428
0.00000000170055203530
0.00000000164057525811
0.00000000158271154295
0.00000000152688652880
0.00000000147302846828
0.00000000142106813591
0.00000000137093873960
0.00000000132257583519
0.00000000127591724406
0.00000000123090297357
0.00000000118747514029
0.00000000114557789599
0.00000000110515735610
0.00000000106616153084
0.00000000102854025861
0.00000000099224514181
0.00000000095722948490
0.00000000092344823460
0.00000000089085792220
0.00000000085941660791
0.00000000082908382716
0.00000000079982053877
0.00000000077158907491
0.00000000074435309290
0.00000000071807752864
0.00000000069272855163
0.00000000066827352172
0.00000000064468094717
0.00000000062192044440
0.00000000059996269894
0.00000000057877942796
0.00000000055834334392
0.00000000053862811965
0.00000000051960835455
0.00000000050125954204
0.00000000048355803814
0.00000000046648103111
0.00000000045000651225
0.00000000043411324759
0.00000000041878075071
0.00000000040398925644
0.00000000038971969547
0.00000000037595366991
0.00000000036267342968
0.00000000034986184971
0.00000000033750240796
0.00000000032557916422
0.00000000031407673963
0.00000000030298029697
0.00000000029227552155
0.00000000028194860287
0.00000000027198621688
0.00000000026237550885
0.00000000025310407686
0.00000000024415995588
0.00000000023553160240
0.00000000022720787956
0.00000000021917804289
0.00000000021143172648
0.00000000020395892964
0.00000000019675000409
0.00000000018979564149
0.00000000018308686156
0.00000000017661500044
0.00000000017037169964
0.00000000016434889523
0.00000000015853880749
0.00000000015293393091
0.00000000014752702451
0.00000000014231110258
0.00000000013727942564
0.00000000013242549177
0.00000000012774302829
0.00000000012322598366
0.00000000011886851967
0.00000000011466500398
0.00000000011061000281
0.00000000010669827399
0.00000000010292476020
0.00000000009928458245
0.00000000009577303382
0.00000000009238557334
0.00000000008911782025
0.00000000008596554823
0.00000000008292468007
0.00000000007999128235
0.00000000007716156038
0.00000000007443185334
0.00000000007179862954
0.00000000006925848188
0.00000000006680812346
0.00000000006444438333
0.00000000006216420241
0.00000000005996462957
0.00000000005784281779
0.00000000005579602051
0.00000000005382158809
0.00000000005191696439
0.00000000005007968346
0.00000000004830736638
0.00000000004659771820
0.00000000004494852496
0.00000000004335765082
0.00000000004182303534
0.00000000004034269080
0.00000000003891469967
0.00000000003753721207
0.00000000003620844345
0.00000000003492667223
0.00000000003369023764
0.00000000003249753751
0.00000000003134702627
0.00000000003023721290
0.00000000002916665902
0.00000000002813397705
0.00000000002713782840
0.00000000002617692176
0.00000000002525001141
0.00000000002435589563
0.00000000002349341513
0.00000000002266145157
0.00000000002185892611
0.00000000002108479801
0.00000000002033806329
0.00000000001961775344
0.00000000001892293415
0.00000000001825270413
0.00000000001760619391
0.00000000001698256474
0.00000000001638100753
0.00000000001580074174
0.00000000001524101441
0.00000000001470109921
0.00000000001418029546
0.00000000001367792722
0.00000000001319334246
0.00000000001272591219
0.00000000001227502963
0.00000000001184010946
0.00000000001142058703
0.00000000001101591766
0.00000000001062557592
0.00000000001024905495
0.00000000000988586578
0.00000000000953553677
0.00000000000919761292
0.00000000000887165532
0.00000000000855724058
0.00000000000825396027
0.00000000000796142041
0.00000000000767924094
0.00000000000740705523
0.00000000000714450964
0.00000000000689126301
0.00000000000664698624
0.00000000000641136189
0.00000000000618408372
0.00000000000596485634
0.00000000000575339479
0.00000000000554942420
0.00000000000535267941
0.00000000000516290465
0.00000000000497985318
0.00000000000480328700
0.00000000000463297653
0.00000000000000000000
57.90227301966957185186
111.58675801397740201537
161.28388292943316173478
207.21288563677674687824
249.58232338169929676042
288.59055996954577949509
324.42623163012336817701
357.26869246935979163027
387.28844037678396716728
414.64752422158534272967
439.49993313526925931001
461.99196864562128439502
482.26260039474777840951
500.44380614333471157806
516.66089673389467407105
531.03282665761059888609
543.67249084238164869021
554.68700825378755325801
564.17799287585830825265
572.24181261474222992547
578.96983664554011284054
584.44867170069733219862
588.76038777737562668335
591.98273372111179924104
594.18934312380326900893
595.44993095557015294617
595.83048133234649412771
595.39342680405707142199
594.19781953196900303737
592.29949470820804435789
589.75122655546806527127
586.60287723061946962844
582.90153894217633023800
578.69166957842503506981
574.01522213039061171003
568.91176818173414631019
563.41861572607842845173
557.57092156115618308831
551.40179849853632276790
544.94241761748151020583
538.22210578172280293074
531.26843862857060685201
524.10732923081422995892
516.76311262326396445133
509.25862637755460582412
501.61528740094257727833
493.85316512726535620459
485.99105126099681228879
478.04652622838722209053
470.03602248304184740846
461.97488480691680479140
453.87742774162182968212
445.75699027907415938898
437.62598793495885729499
429.49596232308778098741
421.37762834362843022973
413.28091909324643893342
405.21502860051577954437
397.18845248543061643431
389.20902663754662853535
381.28396400314511538454
373.41988956785462505650
365.62287361738333402172
357.89846335538032917611
350.25171295397802850857
342.68721210924468323356
335.20911317058562417515
327.82115691009653346555
320.52669699494924770988
313.32872322309998480705
306.22988357994239549953
299.23250517096840894737
292.33861408305108398054
285.54995422462610576986
278.86800519280632215668
272.29399921331526002177
265.82893719708107482802
259.47360395536202304356
253.22858261339999330630
247.09426826080124328655
241.07088087512184415573
235.15847755349403769287
229.35696408555318726030
223.66610589942177966805
218.08553841106692061658
212.61477680597226935788
207.25322528074667616238
202.00018577103352868107
196.85486619088268867017
191.81638820759138752692
186.88379457492467849988
182.05605604656892637649
177.33207789066844384251
172.71070602533370674792
168.19073279408746657282
163.77090239933829707297
159.44991601113216006524
155.22643656762511454872
151.09909328296006947312
147.06648587748901491068
143.12718854459021144976
139.27975366765261355795
135.52271530016670908481
131.85459242124531442641
128.27389197831718092857
124.77911172817776730426
121.36874288704927948856
118.04127259979283337543
114.79518623793252629639
111.62896953568380808974
108.54111057274025142760
105.53010161214517381723
102.59444080117665976104
99.73263374278458570643
96.94319494475406884249
94.22464915341606683796
91.57553257839450111533
88.99439401455708775757
86.47979586703192467212
84.03031508486598966101
81.64454400861635008368
79.32109113690844992561
77.05858181673789886190
74.85565886205463925762
72.71098310493682959077
70.62323388344560726182
68.59110947004123204351
66.61332744424262841676
64.68862501302476175624
62.81575928226552463229
60.99350748238281028080
59.22066715113931678616
57.49605627643528293902
55.81851340176097409085
54.18689769684043255893
52.60008899586136266180
51.05698780555862725805
49.55651528529725879935
48.09761320118308702831
46.67924385611987503353
45.30038999762566476193
43.96005470512158552765
42.65726125830997972344
41.39105298816967604125
40.16049311200900007179
38.96466455393491656878
37.80266975202023616021
36.67363045337572913240
35.57668749826349596788
34.51100059432254596459
33.47574808191251349854
32.47012669152262986927
31.49335129413438494339
30.54465464537383923016
29.62328712423669685450
28.72851646712064521694
27.85962749785388936630
27.01592185436409820909
26.19671771259038806079
25.40134950820223380674
24.62916765665087837078
23.87953827204409762430
23.15184288530126366368
22.44547816201421852611
21.75985562040891707625
21.09440134977523229054
20.44855572970466894844
19.82177315045056076315
19.21352173470172175485
18.62328306103738384536
18.05055188930986886930
17.49483588818173274149
16.95565536502461156942
16.43254299836890552911
15.92504357307728213300
15.43271371839805361503
14.95512164904027763157
14.49184690939762631956
14.04248012103545129037
13.60662273354249762747
13.18388677883700665916
12.77389462900635308529
12.37627875774857422186
11.99068150547461897304
11.61675484812123926304
11.25416016971579935557
10.90256803872622803908
10.56165798822232382292
10.23111829986733667397
9.91064579175237447828
9.59994561008040570016
9.29873102470078727322
9.00672322849022144453
8.72365114057106083578
8.44925121335380424625
8.18326724338601607656
7.92545018598650941044
7.67555797363986069826
7.43335533812338411508
7.19861363633544737439
6.97111067979156562302
6.75063056775204373139
6.53696352394292468091
6.32990573682980350867
6.12925920340224994476
5.93483157642509873142
5.74643601511124479941
5.56389103916929528282
5.38702038617840184287
5.21565287224151230561
5.04962225586734447802
4.88876710503086275850
4.73293066736120771054
4.58196074340562464755
4.43570956291754736611
4.29403366411666542746
4.15679377586858045390
4.02385470273152812126
3.89508521281767094990
3.77035792841635819528
3.64954921932699960507
3.53253909884914607531
3.41921112237785607135
3.30945228855245066057
3.20315294290719920767
3.10020668397282905815
3.00051027177812201785
2.90396353870136980646
2.81046930262181282600
2.71993328232187758786
2.63226401509140073287
2.54737277648568527511
2.46517350218978537058
2.38558271194207138777
2.30851943547065685536
2.23390514039704157767
2.16166366206192028798
2.09172113522871772062
2.02400592762123610058
1.95844857525233528861
1.89498171950141358622
1.83354004589904651112
1.77406022457791356928
1.71648085234982894498
1.66074239636943254972
1.60678713934580241762
1.55455912626393066844
1.50400411257881372329
1.45506951384551741491
1.40770435674935812109
1.36185923150102428103
1.31748624556217808212
1.27453897866774723546
1.23297243911187259791
1.19274302126509823552
1.15380846429111594276
1.11612781203203548230
1.07966137403183881638
1.04437068766829055377
1.01021848136430625331
0.97716863885034987991
0.94518616445011471860
0.91423714936235112027
0.88428873891232961935
0.85530910074704402657
0.82726739394882842227
0.80013373904270868042
0.77387918887333584372
0.74847570032795118777
0.72389610688238947844
0.70011409194768103870
0.67710416299533671136
0.65484162643997578801
0.63330256325843403697
0.61246380532502942007
0.59230291244316213284
0.57279815005391432337
0.55392846760280967100
0.53567347754634297985
0.51801343498040475222
0.50092921787311650572
0.48440230788509242021
0.46841477176055673626
0.45294924327316499202
0.43798890571082643719
0.42351747488419883014
0.40951918264395181790
0.39597876089227568297
0.38288142607450226240
0.37021286413706439022
0.35795921593840895891
0.34610706309981548179
0.33464341428342903040
0.32355569188516025703
0.31283171913043406054
0.30245970756108997435
0.29242824490206748012
0.28272628329680388193
0.27334312790058495901
0.26426842582137854976
0.25549215539797170971
0.24700461580551308360
0.23879641697882716955
0.23085846984415184235
0.22318197685019189325
0.21575842278964604826
0.20857956590260920415
0.20163742925349401047
0.19492429237334510383
0.18843268315965858162
0.18215537002603190975
0.17608535429419205909
0.17021586282116035749
0.16454034085451754721
0.15905244510893568055
0.15374603705733216885
0.14861517643020288881
0.14365411491686419510
0.13885729006252192641
0.13421931935525766022
0.12973499449719386178
0.12539927585426538514
0.12120728707918707046
0.11715430990236286313
0.11323577908563686734
0.10944727753393472536
0.10578453155998542023
0.10224340629746141162
0.09881990125800386993
0.09551014602773820472
0.09231039609901220411
0.08921702883321630528
0.08622653955066475473
0.08333553774364024780
0.08054074340881584027
0.07783898349538238837
0.07522718846531620263
0.07270238896233517656
0.07026171258618196802
0.06790238076898744146
0.06562170575055155386
0.06341708764948594812
0.06128601162724105211
0.05922604514214319105
0.05723483529064312542
0.05531010623306612667
0.05344965670123843354
0.05165135758543547978
0.04991314959818581032
0.04823304101252816334
0.04660910547240093571
0.04503947987290805866
0.04352236230827705166
0.04205601008538834007
0.04063873780082467163
0.03926891547944503374
0.03794496677255526640
0.03666536721380182079
0.03542864253097494087
0.03423336701196080106
0.03307816192314053105
0.03196169397857943212
0.03088267385840884685
0.02983985477484431964
0.02883203108433839146
0.02785803694440725994
0.02691674501372067624
0.02600706519408247167
0.02512794341297766576
0.02427836044539734284
0.02345733077369713260
0.02266390148428010579
0.02189715119993588047
0.02115618904670005240
0.02044015365413799634
0.01974821218798664124
0.01907955941412504616
0.01843341679287353527
0.01780903160265524462
0.01720567609208100562
0.01662264665955145646
0.01605926305949497215
0.01551486763439074816
0.01498882457175108353
0.01448051918526378594
0.01398935721931993115
0.01351476417617799089
0.01305618466503722340
0.01261308177231692390
0.01218493645246120083
0.01177124693860808098
0.01137152817248553681
0.01098531125291441791
0.01061214290231999972
0.01025158495067150614
0.00990321383628801725
0.00956662012296632773
0.00924140803290476529
0.00892719499491188492
0.00862361120740727516
0.00833029921573536468
0.00804691350333004360
0.00777312009628126563
0.00750859618087037356
0.00725302973365325211
0.00700611916368544703
0.00676757296649474916
0.00653710938942074753
0.00631445610795181283
0.00609934991270294578
0.00589153640668806187
0.00569076971255275121
0.00549681218944291818
0.00530943415919626731
0.00512841364155267390
0.00495353609809016243
0.00478459418460159061
0.00462138751163745747
0.00446372241294792742
0.00431141172156675537
0.00416427455328725188
0.00402213609728923824
0.00388482741368289912
0.00375218523774384968
0.00362405179062019354
0.00350027459630009204
0.00338070630463477902
0.00326520452021872602
0.00315363163693518347
0.00304585467798120391
0.00294174514119269854
0.00284117884949553184
0.00274403580631450445
0.00265020005577739585
0.00255955954755666569
0.00247200600619636472
0.00238743480477686832
0.00230574484277478071
0.00222683842798000915
0.00215062116233649334
0.00207700183157745683
0.00200589229853006829
0.00193720739996891284
0.00187086484690090083
0.00180678512816891991
0.00174489141726436644
0.00168510948224296036
0.00162736759864127328
0.00157159646529492084
0.00151772912296257393
0.00146570087566307125
0.00141544921463594860
0.00136691374483863888
0.00132003611389642475
0.00127475994342401695
0.00123103076264014714
0.00118879594419944224
0.00114800464216787529
0.00110860773207103417
0.00107055775294626022
0.00103380885133238457
0.00099831672713270492
0.00096403858128907684
0.00093093306520700050
0.00089896023187357272
0.00086808148861206730
0.00083825955141880271
0.00080945840082963455
0.00078164323926535389
0.00075478044980664476
0.00072883755635120358
0.00070378318510692906
0.00067958702737671716
0.00065621980359193896
0.00063365322855287961
0.00061185997783607142
0.00059081365532950500
0.00057048876185821168
0.00055086066486381040
0.00053190556910288032
0.00051360048833016007
0.00049592321793370895
0.00047885230849024744
0.00046236704020994907
0.00044644739824097057
0.00043107404880500657
0.00041622831613605737
0.00040189216019562553
0.00038804815513828519
0.00037467946850262222
0.00036176984110318695
0.00034930356760006073
0.00033726547772332011
0.00032564091813047728
0.00031441573487569536
0.00030357625647028068
0.00029310927751463541
0.00028300204288252227
0.00027324223243909964
0.00026381794627486647
0.00025471769043815419
0.00024593036314949507
0.00023744524148164095
0.00022925196848963577
0.00022134054077581098
0.00021370129647509806
0.00020632490364653873
0.00019920234905733940
0.00019232492734627590
0.00018568423055369664
0.00017927213800578241
0.00017308080654117254
0.00016710266106840146
0.00016133038544304844
0.00015575691365381469
0.00015037542130712778
0.00014517931740023839
0.00014016223637306093
0.00013531803042939858
0.00013064076211844483
0.00012612469716780902
0.00012176429755957440
0.00011755421484119545
0.00011348928366331348
0.00010956451553683300
0.00010577509280186073
0.00010211636280135509
0.00009858383225257496
0.00009517316180965045
0.00009188016081081263
0.00008870078220405827
0.00008563111764520081
0.00008266739276250191
0.00007980596258223378
0.00007704330710974399
0.00007437602706075745
0.00007180083973783516
0.00006931457504707878
0.00006691417165033491
0.00006459667324831233
0.00006235922499018258
0.00006019907000537512
0.00005811354605343914
0.00005610008228795901
0.00005415619613067320
0.00005227949025204990
0.00005046764965471966
0.00004871843885627373
0.00004702969916806029
0.00004539934606672256
0.00004382536665533313
0.00004230581721108463
0.00004083882081659962
0.00003942256507202165
0.00003805529988514598
0.00003673533533693777
0.00003546103961988215
0.00003423083704668789
0.00003304320612695718
0.00003189667770951227
0.00003078983318814515
0.00002972130276863935
0.00002868976379497450
0.00002769393913270805
0.00002673259560758363
0.00002580454249749185
0.00002490863007596630
0.00002404374820546189
0.00002320882497872125
0.00002240282540659224
0.00002162475015071536
0.00002087363429955353
0.00002014854618628662
0.00001944858624714804
0.00001877288591882117
0.00001812060657356943
0.00001749093849080999
0.00001688309986389190
0.00001629633584087692
0.00001572991759816433
0.00001518314144583955
0.00001465532796366450
0.00001414582116666458
0.00001365398769930270
0.00001317921605726377
0.00001272091583590951
0.00001227851700449038
0.00001185146920523822
0.00001143924107648746
0.00001104131959900614
0.00001065720946474311
0.00001028643246722585
0.00000992852691286927
0.00000958304705248077
0.00000924956253227142
0.00000892765786370655
0.00000861693191155152
0.00000831699739949075
0.00000802748043271861
0.00000774802003692247
0.00000747826771309628
0.00000721788700764370
0.00000696655309724743
0.00000672395238799899
0.00000648978212830186
0.00000626375003507508
0.00000604557393280337
0.00000583498140499263
0.00000563170945760685
0.00000543550419407552
0.00000524612050147542
0.00000506332174750384
0.00000488687948787336
0.00000471657318377121
0.00000455218992903814
0.00000439352418673334
0.00000424037753476428
0.00000409255842026966
0.00000394988192245632
0.00000381216952359921
0.00000367924888792498
0.00000355095364810852
0.00000342712319912114
0.00000330760249917823
0.00000319224187754262
0.00000308089684894833
0.00000297342793441743
0.00000286970048825046
0.00000276958453097847
0.00000267295458807172
0.00000257968953420768
0.00000248967244290681
0.00000240279044135228
0.00000231893457021495
0.00000223799964831192
0.00000215988414193245
0.00000208449003867071
0.00000201172272561046
0.00000194149087171206
0.00000187370631425722
0.00000180828394921198
0.00000174514162537310
0.00000168420004216772
0.00000162538265098063
0.00000156861555988766
0.00000151382744167812
0.00000146094944505285
0.00000140991510888889
0.00000136066027946484
0.00000131312303054529
0.00000126724358622558
0.00000122296424644206
0.00000118022931505587
0.00000113898503042170
0.00000109917949835584
0.00000106076262742093
0.00000102368606644743
0.00000098790314421497
0.00000095336881121881
0.00000092003958344989
0.00000088787348811868
0.00000085683001125615
0.00000082687004712685
0.00000079795584939186
0.00000077005098396097
0.00000074312028347609
0.00000071712980336945
0.00000069204677944227
0.00000066783958691153
0.00000064447770087406
0.00000062193165813909
0.00000060017302038199
0.00000057917433857365
0.00000055890911864143
0.00000053935178831909
0.00000052047766514471
0.00000050226292556697
0.00000048468457512148
0.00000046772041964009
0.00000045134903745775
0.00000043554975258212
0.00000042030260879303
0.00000040558834463926
0.00000039138836930200
0.00000037768473929474
0.00000036446013597090
0.00000035169784381105
0.00000033938172946304
0.00000032749622150867
0.00000031602629093212
0.00000030495743226557
0.00000029427564538881
0.00000028396741796007
0.00000027401970845630
0.00000026441992980180
0.00000025515593356481
0.00000024621599470248
0.00000023758879683516
0.00000022926341803170
0.00000022122931708813
0.00000021347632028255
0.00000020599460858986
0.00000019877470534025
0.00000019180746430619
0.00000018508405820314
0.00000017859596758943
0.00000017233497015170
0.00000016629313036247
0.00000016046278949687
0.00000015483655599622
0.00000014940729616633
0.00000014416812519897
0.00000013911239850530
0.00000013423370335046
0.00000012952585077882
0.00000012498286781993
0.00000012059898996529
0.00000011636865390667
0.00000011228649052685
0.00000010834731813403
0.00000010454613593146
0.00000010087811771421
0.00000009733860578498
0.00000009392310508166
0.00000009062727750900
0.00000008744693646752
0.00000008437804157268
0.00000008141669355779
0.00000007855912935426
0.00000007580171734292
0.00000007314095277077
0.00000007057345332702
0.00000006809595487320
0.00000006570530732189
0.00000006339847065880
0.00000006117251110346
0.00000005902459740344
0.00000005695199725762
0.00000005495207386407
0.00000005302228258802
0.00000005116016774594
0.00000004936335950157
0.00000004762957087010
0.00000004595659482664
0.00000004434230151547
0.00000004278463555647
0.00000004128161344540
0.00000003983132104479
0.00000003843191116217
0.00000003708160121281
0.00000003577867096379
0.00000003452146035681
0.00000003330836740677
0.00000003213784617368
0.00000003100840480525
0.00000002991860364771
0.00000002886705342244
0.00000002785241346632
0.00000002687339003328
0.00000002592873465515
0.00000002501724255970
0.00000002413775114382
0.00000002328913849991
0.00000002247032199378
0.00000002168025689206
0.00000002091793503754
0.00000002018238357072
0.00000001947266369597
0.00000001878786949075
0.00000001812712675633
0.00000001748959190871
0.00000001687445090818
0.00000001628091822624
0.00000001570823584865
0.00000001515567231319
0.00000001462252178108
0.00000001410810314077
0.00000001361175914309
0.00000001313285556652
0.00000001267078041166
0.00000001222494312379
0.00000001179477384266
0.00000001137972267839
0.00000001097925901268
0.00000001059287082454
0.00000001022006403937
0.00000000986036190101
0.00000000951330436554
0.00000000917844751636
0.00000000885536299972
0.00000000854363747988
0.00000000824287211343
0.00000000795268204192
0.00000000767269590219
0.00000000740255535389
0.00000000714191462349
0.00000000689044006419
0.00000000664780973129
0.00000000641371297233
0.00000000618785003160
0.00000000596993166851
0.00000000575967878925
0.00000000555682209132
0.00000000536110172060
0.00000000517226694027
0.00000000499007581142
0.00000000481429488478
0.00000000464469890324
0.00000000448107051480
0.00000000432319999556
0.00000000417088498235
0.00000000402393021477
0.00000000388214728627
0.00000000374535440389
0.00000000361337615642
0.00000000348604329073
0.00000000336319249584
0.00000000324466619460
0.00000000313031234270
0.00000000301998423462
0.00000000291354031645
0.00000000281084400525
0.00000000271176351469
0.00000000261617168688
0.00000000252394582998
0.00000000243496756163
0.00000000234912265771
0.00000000226630090655
0.00000000218639596812
0.00000000210930523822
0.00000000203492971745
0.00000000196317388466
0.00000000189394557500
0.00000000182715586205
0.00000000176271894428
0.00000000170055203530
0.00000000164057525811
0.00000000158271154295
0.00000000152688652880
0.00000000147302846828
0.00000000142106813591
0.00000000137093873960
0.00000000132257583519
0.00000000127591724406
0.00000000123090297357
0.00000000118747514029
0.00000000114557789599
0.00000000110515735610
0.00000000106616153084
0.00000000102854025861
0.00000000099224514181
0.00000000095722948490
0.00000000092344823460
0.00000000089085792220
0.00000000085941660791
0.00000000082908382716
0.00000000079982053877
0.00000000077158907491
0.00000000074435309290
0.00000000071807752864
0.00000000069272855163
0.00000000066827352172
0.00000000064468094717
0.00000000062192044440
0.00000000059996269894
0.00000000057877942796
0.00000000055834334392
0.00000000053862811965
0.00000000051960835455
0.00000000050125954204
0.00000000048355803814
0.00000000046648103111
0.00000000045000651225
0.00000000043411324759
0.00000000041878075071
0.00000000040398925644
0.00000000038971969547
0.00000000037595366991
0.00000000036267342968
0.00000000034986184971
0.00000000033750240796
0.00000000032557916422
0.00000000031407673963
0.00000000030298029697
0.00000000029227552155
0.00000000028194860287
0.00000000027198621688
0.00000000026237550885
0.00000000025310407686
0.00000000024415995588
0.00000000023553160240
0.00000000022720787956
0.00000000021917804289
0.00000000021143172648
0.00000000020395892964
0.00000000019675000409
0.00000000018979564149
0.00000000018308686156
0.00000000017661500044
0.00000000017037169964
0.00000000016434889523
0.00000000015853880749
0.00000000015293393091
0.00000000014752702451
0.00000000014231110258
0.00000000013727942564
0.00000000013242549177
0.00000000012774302829
0.00000000012322598366
0.00000000011886851967
0.00000000011466500398
0.00000000011061000281
0.00000000010669827399
0.00000000010292476020
0.00000000009928458245
0.00000000009577303382
0.00000000009238557334
0.00000000008911782025
0.00000000008596554823
0.00000000008292468007
0.00000000007999128235
0.00000000007716156038
0.00000000007443185334
0.00000000007179862954
0.00000000006925848188
0.00000000006680812346
0.00000000006444438333
0.00000000006216420241
0.00000000005996462957
0.00000000005784281779
0.00000000005579602051
0.00000000005382158809
0.00000000005191696439
0.00000000005007968346
0.00000000004830736638
0.00000000004659771820
0.00000000004494852496
0.00000000004335765082
0.00000000004182303534
0.00000000004034269080
0.00000000003891469967
0.00000000003753721207
0.00000000003620844345
0.00000000003492667223
0.00000000003369023764
0.00000000003249753751
0.00000000003134702627
0.00000000003023721290
0.00000000002916665902
0.00000000002813397705
0.00000000002713782840
0.00000000002617692176
0.00000000002525001141
0.00000000002435589563
0.00000000002349341513
0.00000000002266145157
0.00000000002185892611
0.00000000002108479801
0.00000000002033806329
0.00000000001961775344
0.00000000001892293415
0.00000000001825270413
0.00000000001760619391
0.00000000001698256474
0.00000000001638100753
0.00000000001580074174
0.00000000001524101441
0.00000000001470109921
0.00000000001418029546
0.00000000001367792722
0.00000000001319334246
0.00000000001272591219
0.00000000001227502963
0.00000000001184010946
0.00000000001142058703
0.00000000001101591766
0.00000000001062557592
0.00000000001024905495
0.00000000000988586578
0.00000000000953553677
0.00000000000919761292
0.00000000000887165532
0.00000000000855724058
0.00000000000825396027
0.00000000000796142041
0.00000000000767924094
0.00000000000740705523
0.00000000000714450964
0.00000000000689126301
0.00000000000664698624
0.00000000000641136189
0.00000000000618408372
0.00000000000596485634
0.00000000000575339479
0.00000000000554942420
0.00000000000535267941
0.00000000000516290465
0.00000000000497985318
0.00000000000480328700
0.00000000000463297653
0.00000000000000000000
57.90227301966957185186
111.58675801397740201537
161.28388292943316173478
207.21288563677674687824
249.58232338169929676042
288.59055996954577949509
324.42623163012336817701
357.26869246935979163027
387.28844037678396716728
414.64752422158534272967
439.49993313526925931001
461.99196864562128439502
482.26260039474777840951
500.44380614333471157806
516.66089673389467407105
531.03282665761059888609
543.67249084238164869021
554.68700825378755325801
564.17799287585830825265
572.24181261474222992547
578.96983664554011284054
584.44867170069733219862
588.76038777737562668335
591.98273372111179924104
594.18934312380326900893
595.44993095557015294617
595.83048133234649412771
595.39342680405707142199
594.19781953196900303737
592.29949470820804435789
589.75122655546806527127
586.60287723061946962844
582.90153894217633023800
578.69166957842503506981
574.01522213039061171003
568.91176818173414631019
563.41861572607842845173
557.57092156115618308831
551.40179849853632276790
544.94241761748151020583
538.22210578172280293074
531.26843862857060685201
524.10732923081422995892
516.76311262326396445133
509.25862637755460582412
501.61528740094257727833
493.85316512726535620459
485.99105126099681228879
478.04652622838722209053
470.03602248304184740846
461.97488480691680479140
453.87742774162182968212
445.75699027907415938898
437.62598793495885729499
429.49596232308778098741
421.37762834362843022973
413.28091909324643893342
405.21502860051577954437
397.18845248543061643431
389.20902663754662853535
381.28396400314511538454
373.41988956785462505650
365.62287361738333402172
357.89846335538032917611
350.25171295397802850857
342.68721210924468323356
335.20911317058562417515
327.82115691009653346555
320.52669699494924770988
313.32872322309998480705
306.22988357994239549953
299.23250517096840894737
292.33861408305108398054
285.54995422462610576986
278.86800519280632215668
272.29399921331526002177
265.82893719708107482802
259.47360395536202304356
253.22858261339999330630
247.09426826080124328655
241.07088087512184415573
235.15847755349403769287
229.35696408555318726030
223.66610589942177966805
218.08553841106692061658
212.61477680597226935788
207.25322528074667616238
202.00018577103352868107
196.85486619088268867017
191.81638820759138752692
186.88379457492467849988
182.05605604656892637649
177.33207789066844384251
172.71070602533370674792
168.19073279408746657282
163.77090239933829707297
159.44991601113216006524
155.22643656762511454872
151.09909328296006947312
147.06648587748901491068
143.12718854459021144976
139.27975366765261355795
135.52271530016670908481
131.85459242124531442641
128.27389197831718092857
124.77911172817776730426
121.36874288704927948856
118.04127259979283337543
114.79518623793252629639
111.62896953568380808974
108.54111057274025142760
105.53010161214517381723
102.59444080117665976104
99.73263374278458570643
96.94319494475406884249
94.22464915341606683796
91.57553257839450111533
88.99439401455708775757
86.47979586703192467212
84.03031508486598966101
81.64454400861635008368
79.32109113690844992561
77.05858181673789886190
74.85565886205463925762
72.71098310493682959077
70.62323388344560726182
68.59110947004123204351
66.61332744424262841676
64.68862501302476175624
62.81575928226552463229
60.99350748238281028080
59.22066715113931678616
57.49605627643528293902
55.81851340176097409085
54.18689769684043255893
52.60008899586136266180
51.05698780555862725805
49.55651528529725879935
48.09761320118308702831
46.67924385611987503353
45.30038999762566476193
43.96005470512158552765
42.65726125830997972344
41.39105298816967604125
40.16049311200900007179
38.96466455393491656878
37.80266975202023616021
36.67363045337572913240
35.57668749826349596788
34.51100059432254596459
33.47574808191251349854
32.47012669152262986927
31.49335129413438494339
30.54465464537383923016
29.62328712423669685450
28.72851646712064521694
27.85962749785388936630
27.01592185436409820909
26.19671771259038806079
25.40134950820223380674
24.62916765665087837078
23.87953827204409762430
23.15184288530126366368
22.44547816201421852611
21.75985562040891707625
21.09440134977523229054
20.44855572970466894844
19.82177315045056076315
19.21352173470172175485
18.62328306103738384536
18.05055188930986886930
17.49483588818173274149
16.95565536502461156942
16.43254299836890552911
15.92504357307728213300
15.43271371839805361503
14.95512164904027763157
14.49184690939762631956
14.04248012103545129037
13.60662273354249762747
13.18388677883700665916
12.77389462900635308529
12.37627875774857422186
11.99068150547461897304
11.61675484812123926304
11.25416016971579935557
10.90256803872622803908
10.56165798822232382292
10.23111829986733667397
9.91064579175237447828
9.59994561008040570016
9.29873102470078727322
9.00672322849022144453
8.72365114057106083578
8.44925121335380424625
8.18326724338601607656
7.92545018598650941044
7.67555797363986069826
7.43335533812338411508
7.19861363633544737439
6.97111067979156562302
6.75063056775204373139
6.53696352394292468091
6.32990573682980350867
6.12925920340224994476
5.93483157642509873142
5.74643601511124479941
5.56389103916929528282
5.38702038617840184287
5.21565287224151230561
5.04962225586734447802
4.88876710503086275850
4.73293066736120771054
4.58196074340562464755
4.43570956291754736611
4.29403366411666542746
4.15679377586858045390
4.02385470273152812126
3.89508521281767094990
3.77035792841635819528
3.64954921932699960507
3.53253909884914607531
3.41921112237785607135
3.30945228855245066057
3.20315294290719920767
3.10020668397282905815
3.00051027177812201785
2.90396353870136980646
2.81046930262181282600
2.71993328232187758786
2.63226401509140073287
2.54737277648568527511
2.46517350218978537058
2.38558271194207138777
2.30851943547065685536
2.23390514039704157767
2.16166366206192028798
2.09172113522871772062
2.02400592762123610058
1.95844857525233528861
1.89498171950141358622
1.83354004589904651112
1.77406022457791356928
1.71648085234982894498
1.66074239636943254972
1.60678713934580241762
1.55455912626393066844
1.50400411257881372329
1.45506951384551741491
1.40770435674935812109
1.36185923150102428103
1.31748624556217808212
1.27453897866774723546
1.23297243911187259791
1.19274302126509823552
1.15380846429111594276
1.11612781203203548230
1.07966137403183881638
1.04437068766829055377
1.01021848136430625331
0.97716863885034987991
0.94518616445011471860
0.91423714936235112027
0.88428873891232961935
0.85530910074704402657
0.82726739394882842227
0.80013373904270868042
0.77387918887333584372
0.74847570032795118777
0.72389610688238947844
0.70011409194768103870
0.67710416299533671136
0.65484162643997578801
0.63330256325843403697
0.61246380532502942007
0.59230291244316213284
0.57279815005391432337
0.55392846760280967100
0.53567347754634297985
0.51801343498040475222
0.50092921787311650572
0.48440230788509242021
0.46841477176055673626
0.45294924327316499202
0.43798890571082643719
0.42351747488419883014
0.40951918264395181790
0.39597876089227568297
0.38288142607450226240
0.37021286413706439022
0.35795921593840895891
0.34610706309981548179
0.33464341428342903040
0.32355569188516025703
0.31283171913043406054
0.30245970756108997435
0.29242824490206748012
0.28272628329680388193
0.27334312790058495901
0.26426842582137854976
0.25549215539797170971
0.24700461580551308360
0.23879641697882716955
0.23085846984415184235
0.22318197685019189325
0.21575842278964604826
0.20857956590260920415
0.20163742925349401047
0.19492429237334510383
0.18843268315965858162
0.18215537002603190975
0.17608535429419205909
0.17021586282116035749
0.16454034085451754721
0.15905244510893568055
0.15374603705733216885
0.14861517643020288881
0.14365411491686419510
0.13885729006252192641
0.13421931935525766022
0.12973499449719386178
0.12539927585426538514
0.12120728707918707046
0.11715430990236286313
0.11323577908563686734
0.10944727753393472536
0.10578453155998542023
0.10224340629746141162
0.09881990125800386993
0.09551014602773820472
0.09231039609901220411
0.08921702883321630528
0.08622653955066475473
0.08333553774364024780
0.08054074340881584027
0.07783898349538238837
0.07522718846531620263
0.07270238896233517656
0.07026171258618196802
0.06790238076898744146
0.06562170575055155386
0.06341708764948594812
0.06128601162724105211
0.05922604514214319105
0.05723483529064312542
0.05531010623306612667
0.05344965670123843354
0.05165135758543547978
0.04991314959818581032
0.04823304101252816334
0.04660910547240093571
0.04503947987290805866
0.04352236230827705166
0.04205601008538834007
0.04063873780082467163
0.03926891547944503374
0.03794496677255526640
0.03666536721380182079
0.03542864253097494087
0.03423336701196080106
0.03307816192314053105
0.03196169397857943212
0.03088267385840884685
0.02983985477484431964
0.02883203108433839146
0.02785803694440725994
0.02691674501372067624
0.02600706519408247167
0.02512794341297766576
0.02427836044539734284
0.02345733077369713260
0.02266390148428010579
0.02189715119993588047
0.02115618904670005240
0.02044015365413799634
0.01974821218798664124
0.01907955941412504616
0.01843341679287353527
0.01780903160265524462
0.01720567609208100562
0.01662264665955145646
0.01605926305949497215
0.01551486763439074816
0.01498882457175108353
0.01448051918526378594
0.01398935721931993115
0.01351476417617799089
0.01305618466503722340
0.01261308177231692390
0.01218493645246120083
0.01177124693860808098
0.01137152817248553681
0.01098531125291441791
0.01061214290231999972
0.01025158495067150614
0.00990321383628801725
0.00956662012296632773
0.00924140803290476529
0.00892719499491188492
0.00862361120740727516
0.00833029921573536468
0.00804691350333004360
0.00777312009628126563
0.00750859618087037356
0.00725302973365325211
0.00700611916368544703
0.00676757296649474916
0.00653710938942074753
0.00631445610795181283
0.00609934991270294578
0.00589153640668806187
0.00569076971255275121
0.00549681218944291818
0.00530943415919626731
0.00512841364155267390
0.00495353609809016243
0.00478459418460159061
0.00462138751163745747
0.00446372241294792742
0.00431141172156675537
0.00416427455328725188
0.00402213609728923824
0.00388482741368289912
0.00375218523774384968
0.00362405179062019354
0.00350027459630009204
0.00338070630463477902
0.00326520452021872602
0.00315363163693518347
0.00304585467798120391
0.00294174514119269854
0.00284117884949553184
0.00274403580631450445
0.00265020005577739585
0.00255955954755666569
0.00247200600619636472
0.00238743480477686832
0.00230574484277478071
0.00222683842798000915
0.00215062116233649334
0.00207700183157745683
0.00200589229853006829
0.00193720739996891284
0.00187086484690090083
0.00180678512816891991
0.00174489141726436644
0.00168510948224296036
0.00162736759864127328
0.00157159646529492084
0.00151772912296257393
0.00146570087566307125
0.00141544921463594860
0.00136691374483863888
0.00132003611389642475
0.00127475994342401695
0.00123103076264014714
0.00118879594419944224
0.00114800464216787529
0.00110860773207103417
0.00107055775294626022
0.00103380885133238457
0.00099831672713270492
0.00096403858128907684
0.00093093306520700050
0.00089896023187357272
0.00086808148861206730
0.00083825955141880271
0.00080945840082963455
0.00078164323926535389
0.00075478044980664476
0.00072883755635120358
0.00070378318510692906
0.00067958702737671716
0.00065621980359193896
0.00063365322855287961
0.00061185997783607142
0.00059081365532950500
0.00057048876185821168
0.00055086066486381040
0.00053190556910288032
0.00051360048833016007
0.00049592321793370895
0.00047885230849024744
0.00046236704020994907
0.00044644739824097057
0.00043107404880500657
0.00041622831613605737
0.00040189216019562553
0.00038804815513828519
0.00037467946850262222
0.00036176984110318695
0.00034930356760006073
0.00033726547772332011
0.00032564091813047728
0.00031441573487569536
0.00030357625647028068
0.00029310927751463541
0.00028300204288252227
0.00027324223243909964
0.00026381794627486647
0.00025471769043815419
0.00024593036314949507
0.00023744524148164095
0.00022925196848963577
0.00022134054077581098
0.00021370129647509806
0.00020632490364653873
0.00019920234905733940
0.00019232492734627590
0.00018568423055369664
0.00017927213800578241
0.00017308080654117254
0.00016710266106840146
0.00016133038544304844
0.00015575691365381469
0.00015037542130712778
0.00014517931740023839
0.00014016223637306093
0.00013531803042939858
0.00013064076211844483
0.00012612469716780902
0.00012176429755957440
0.00011755421484119545
0.00011348928366331348
0.00010956451553683300
0.00010577509280186073
0.00010211636280135509
0.00009858383225257496
0.00009517316180965045
0.00009188016081081263
0.00008870078220405827
0.00008563111764520081
0.00008266739276250191
0.00007980596258223378
0.00007704330710974399
0.00007437602706075745
0.00007180083973783516
0.00006931457504707878
0.00006691417165033491
0.00006459667324831233
0.00006235922499018258
0.00006019907000537512
0.00005811354605343914
0.00005610008228795901
0.00005415619613067320
0.00005227949025204990
0.00005046764965471966
0.00004871843885627373
0.00004702969916806029
0.00004539934606672256
0.00004382536665533313
0.00004230581721108463
0.00004083882081659962
0.00003942256507202165
0.00003805529988514598
0.00003673533533693777
0.00003546103961988215
0.00003423083704668789
0.00003304320612695718
0.00003189667770951227
0.00003078983318814515
0.00002972130276863935
0.00002868976379497450
0.00002769393913270805
0.00002673259560758363
0.00002580454249749185
0.00002490863007596630
0.00002404374820546189
0.00002320882497872125
0.00002240282540659224
0.00002162475015071536
0.00002087363429955353
0.00002014854618628662
0.00001944858624714804
0.00001877288591882117
0.00001812060657356943
0.00001749093849080999
0.00001688309986389190
0.00001629633584087692
0.00001572991759816433
0.00001518314144583955
0.00001465532796366450
0.00001414582116666458
0.00001365398769930270
0.00001317921605726377
0.00001272091583590951
0.00001227851700449038
0.00001185146920523822
0.00001143924107648746
0.00001104131959900614
0.00001065720946474311
0.00001028643246722585
0.00000992852691286927
0.00000958304705248077
0.00000924956253227142
0.00000892765786370655
0.00000861693191155152
0.00000831699739949075
0.00000802748043271861
0.00000774802003692247
0.00000747826771309628
0.00000721788700764370
0.00000696655309724743
0.00000672395238799899
0.00000648978212830186
0.00000626375003507508
0.00000604557393280337
0.00000583498140499263
0.00000563170945760685
0.00000543550419407552
0.00000524612050147542
0.00000506332174750384
0.00000488687948787336
0.00000471657318377121
0.00000455218992903814
0.00000439352418673334
0.00000424037753476428
0.00000409255842026966
0.00000394988192245632
0.00000381216952359921
0.00000367924888792498
0.00000355095364810852
0.00000342712319912114
0.00000330760249917823
0.00000319224187754262
0.00000308089684894833
0.00000297342793441743
0.00000286970048825046
0.00000276958453097847
0.00000267295458807172
0.00000257968953420768
0.00000248967244290681
0.00000240279044135228
0.00000231893457021495
0.00000223799964831192
0.00000215988414193245
0.00000208449003867071
0.00000201172272561046
0.00000194149087171206
0.00000187370631425722
0.00000180828394921198
0.00000174514162537310
0.00000168420004216772
0.00000162538265098063
0.00000156861555988766
0.00000151382744167812
0.00000146094944505285
0.00000140991510888889
0.00000136066027946484
0.00000131312303054529
0.00000126724358622558
0.00000122296424644206
0.00000118022931505587
0.00000113898503042170
0.00000109917949835584
0.00000106076262742093
0.00000102368606644743
0.00000098790314421497
0.00000095336881121881
0.00000092003958344989
0.00000088787348811868
0.00000085683001125615
0.00000082687004712685
0.00000079795584939186
0.00000077005098396097
0.00000074312028347609
0.00000071712980336945
0.00000069204677944227
0.00000066783958691153
0.00000064447770087406
0.00000062193165813909
0.00000060017302038199
0.00000057917433857365
0.00000055890911864143
0.00000053935178831909
0.00000052047766514471
0.00000050226292556697
0.00000048468457512148
0.00000046772041964009
0.00000045134903745775
0.00000043554975258212
0.00000042030260879303
0.00000040558834463926
0.00000039138836930200
0.00000037768473929474
0.00000036446013597090
0.00000035169784381105
0.00000033938172946304
0.00000032749622150867
0.00000031602629093212
0.00000030495743226557
0.00000029427564538881
0.00000028396741796007
0.00000027401970845630
0.00000026441992980180
0.00000025515593356481
0.00000024621599470248
0.00000023758879683516
0.00000022926341803170
0.00000022122931708813
0.00000021347632028255
0.00000020599460858986
0.00000019877470534025
0.00000019180746430619
0.00000018508405820314
0.00000017859596758943
0.00000017233497015170
0.00000016629313036247
0.00000016046278949687
0.00000015483655599622
0.00000014940729616633
0.00000014416812519897
0.00000013911239850530
0.00000013423370335046
0.00000012952585077882
0.00000012498286781993
0.00000012059898996529
0.00000011636865390667
0.00000011228649052685
0.00000010834731813403
0.00000010454613593146
0.00000010087811771421
0.00000009733860578498
0.00000009392310508166
0.00000009062727750900
0.00000008744693646752
0.00000008437804157268
0.00000008141669355779
0.00000007855912935426
0.00000007580171734292
0.00000007314095277077
0.00000007057345332702
0.00000006809595487320
0.00000006570530732189
0.00000006339847065880
0.00000006117251110346
0.00000005902459740344
0.00000005695199725762
0.00000005495207386407
0.00000005302228258802
0.00000005116016774594
0.00000004936335950157
0.00000004762957087010
0.00000004595659482664
0.00000004434230151547
0.00000004278463555647
0.00000004128161344540
0.00000003983132104479
0.00000003843191116217
0.00000003708160121281
0.00000003577867096379
0.00000003452146035681
0.00000003330836740677
0.00000003213784617368
0.00000003100840480525
0.00000002991860364771
0.00000002886705342244
0.00000002785241346632
0.00000002687339003328
0.00000002592873465515
0.00000002501724255970
0.00000002413775114382
0.00000002328913849991
0.00000002247032199378
0.00000002168025689206
0.00000002091793503754
0.00000002018238357072
0.00000001947266369597
0.00000001878786949075
0.00000001812712675633
0.00000001748959190871
0.00000001687445090818
0.00000001628091822624
0.00000001570823584865
0.00000001515567231319
0.00000001462252178108
0.00000001410810314077
0.00000001361175914309
0.00000001313285556652
0.00000001267078041166
0.00000001222494312379
0.00000001179477384266
0.00000001137972267839
0.00000001097925901268
0.00000001059287082454
0.00000001022006403937
0.00000000986036190101
0.00000000951330436554
0.00000000917844751636
0.00000000885536299972
0.00000000854363747988
0.00000000824287211343
0.00000000795268204192
0.00000000767269590219
0.00000000740255535389
0.00000000714191462349
0.00000000689044006419
0.00000000664780973129
0.00000000641371297233
0.00000000618785003160
0.00000000596993166851
0.00000000575967878925
0.00000000555682209132
0.00000000536110172060
0.00000000517226694027
0.00000000499007581142
0.00000000481429488478
0.00000000464469890324
0.00000000448107051480
0.00000000432319999556
0.00000000417088498235
0.00000000402393021477
0.00000000388214728627
0.00000000374535440389
0.00000000361337615642
0.00000000348604329073
0.00000000336319249584
0.00000000324466619460
0.00000000313031234270
0.00000000301998423462
0.00000000291354031645
0.00000000281084400525
0.00000000271176351469
0.00000000261617168688
0.00000000252394582998
0.00000000243496756163
0.00000000234912265771
0.00000000226630090655
0.00000000218639596812
0.00000000210930523822
0.00000000203492971745
0.00000000196317388466
0.00000000189394557500
0.00000000182715586205
0.00000000176271894428
0.00000000170055203530
0.00000000164057525811
0.00000000158271154295
0.00000000152688652880
0.00000000147302846828
0.00000000142106813591
0.00000000137093873960
0.00000000132257583519
0.00000000127591724406
0.00000000123090297357
0.00000000118747514029
0.00000000114557789599
0.00000000110515735610
0.00000000106616153084
0.00000000102854025861
0.00000000099224514181
0.00000000095722948490
0.00000000092344823460
0.00000000089085792220
0.00000000085941660791
0.00000000082908382716
0.00000000079982053877
0.00000000077158907491
0.00000000074435309290
0.00000000071807752864
0.00000000069272855163
0.00000000066827352172
0.00000000064468094717
0.00000000062192044440
0.00000000059996269894
0.00000000057877942796
0.00000000055834334392
0.00000000053862811965
0.00000000051960835455
0.00000000050125954204
0.00000000048355803814
0.00000000046648103111
0.00000000045000651225
0.00000000043411324759
0.00000000041878075071
0.00000000040398925644
0.00000000038971969547
0.00000000037595366991
0.00000000036267342968
0.00000000034986184971
0.00000000033750240796
0.00000000032557916422
0.00000000031407673963
0.00000000030298029697
0.00000000029227552155
0.00000000028194860287
0.00000000027198621688
0.00000000026237550885
0.00000000025310407686
0.00000000024415995588
0.00000000023553160240
0.00000000022720787956
0.00000000021917804289
0.00000000021143172648
0.00000000020395892964
0.00000000019675000409
0.00000000018979564149
0.00000000018308686156
0.00000000017661500044
0.00000000017037169964
0.00000000016434889523
0.00000000015853880749
0.00000000015293393091
0.00000000014752702451
0.00000000014231110258
0.00000000013727942564
0.00000000013242549177
0.00000000012774302829
0.00000000012322598366
0.00000000011886851967
0.00000000011466500398
0.00000000011061000281
0.00000000010669827399
0.00000000010292476020
0.00000000009928458245
0.00000000009577303382
0.00000000009238557334
0.00000000008911782025
0.00000000008596554823
0.00000000008292468007
0.00000000007999128235
0.00000000007716156038
0.00000000007443185334
0.00000000007179862954
0.00000000006925848188
0.00000000006680812346
0.00000000006444438333
0.00000000006216420241
0.00000000005996462957
0.00000000005784281779
0.00000000005579602051
0.00000000005382158809
0.00000000005191696439
0.00000000005007968346
0.00000000004830736638
0.00000000004659771820
0.00000000004494852496
0.00000000004335765082
0.00000000004182303534
0.00000000004034269080
0.00000000003891469967
0.00000000003753721207
0.00000000003620844345
0.00000000003492667223
0.00000000003369023764
0.00000000003249753751
0.00000000003134702627
0.00000000003023721290
0.00000000002916665902
0.00000000002813397705
0.00000000002713782840
0.00000000002617692176
0.00000000002525001141
0.00000000002435589563
0.00000000002349341513
0.00000000002266145157
0.00000000002185892611
0.00000000002108479801
0.00000000002033806329
0.00000000001961775344
0.00000000001892293415
0.00000000001825270413
0.00000000001760619391
0.00000000001698256474
0.00000000001638100753
0.00000000001580074174
0.00000000001524101441
0.00000000001470109921
0.00000000001418029546
0.00000000001367792722
0.00000000001319334246
0.00000000001272591219
0.00000000001227502963
0.00000000001184010946
0.00000000001142058703
0.00000000001101591766
0.00000000001062557592
0.00000000001024905495
0.00000000000988586578
0.00000000000953553677
0.00000000000919761292
0.00000000000887165532
0.00000000000855724058
0.00000000000825396027
0.00000000000796142041
0.00000000000767924094
0.00000000000740705523
0.00000000000714450964
0.00000000000689126301
0.00000000000664698624
0.00000000000641136189
0.00000000000618408372
0.00000000000596485634
0.00000000000575339479
0.00000000000554942420
0.00000000000535267941
0.00000000000516290465
0.00000000000497985318
0.00000000000480328700
0.00000000000463297653
