# Supplementary material
Source: publisher figshare collection journal article supplement (https://rs.figshare.com/ndownloader/files/37464464)
Supplement: Supplementary file 2 [file 37464464 › Ordered_Nanoporous_Metals_SI/ONMs_EAM_Potential_files/EAM_Pt.Sheng.lammps.eam]

# EAM potentials generated by H.W.Sheng (hsheng@gmu.edu) on Thu May 20 11:45:47 2010
#
##
   2  Pt1 Pt2   
 1001   1.0000000000000000e-03 1001   6.4999999999999997e-03   6.5000000000000000e+00 # nrho drho nr dr cutoff
   78 195.09  0 dummy #Atomic_number  atomic_mass (g/cm^3) lattice_constant lattice_type
 -8.9463610299260221e-01 -9.2972854394605464e-01 -9.6468032834472706e-01 -9.9949146714810122e-01 -1.0341619785584102e+00
 -1.0686918879661507e+00 -1.1030812278955942e+00 -1.1373300379503000e+00 -1.1714383647586255e+00 -1.2054062619192396e+00
 -1.2392337899466335e+00 -1.2729210162166322e+00 -1.3064680149119081e+00 -1.3398748669674911e+00 -1.3731416600162809e+00
 -1.4062684883345593e+00 -1.4392554527875019e+00 -1.4721026607746892e+00 -1.5048102261756195e+00 -1.5373782692952203e+00
 -1.5698069168093598e+00 -1.6020963017103589e+00 -1.6342465632525034e+00 -1.6662578468975560e+00 -1.6981303042602671e+00
 -1.7298640930538878e+00 -1.7614593770356808e+00 -1.7929163259524330e+00 -1.8242351154859668e+00 -1.8554159271986523e+00
 -1.8864589484789192e+00 -1.9173643724867677e+00 -1.9481323980992817e+00 -1.9787632298561404e+00 -2.0092570779051284e+00
 -2.0396141579476508e+00 -2.0698346911842407e+00 -2.0999189042600763e+00 -2.1298670292104873e+00 -2.1596793034064712e+00
 -2.1893559695002018e+00 -2.2188972753705443e+00 -2.2483034740685639e+00 -2.2775748237630395e+00 -2.3067115876859754e+00
 -2.3357140340781131e+00 -2.3645824361344423e+00 -2.3933170719497134e+00 -2.4219182244639503e+00 -2.4503861814079597e+00
 -2.4787212352488464e+00 -2.5069236831355211e+00 -2.5349938268442163e+00 -2.5629319727239945e+00 -2.5907384316422633e+00
 -2.6184135189302848e+00 -2.6459575543286888e+00 -2.6733708619329830e+00 -2.7006537701390680e+00 -2.7278066115887460e+00
 -2.7548297231152330e+00 -2.7817234456886730e+00 -2.8084881243616477e+00 -2.8351241082146879e+00 -2.8616317503017883e+00
 -2.8880114075959158e+00 -2.9142634409345236e+00 -2.9403882149650626e+00 -2.9663860980904917e+00 -2.9922574624147931e+00
 -3.0180026836884797e+00 -3.0436221412541116e+00 -3.0691162179918026e+00 -3.0944853002647381e+00 -3.1197297778646820e+00
 -3.1448500439574913e+00 -3.1698464950286263e+00 -3.1947195308286629e+00 -3.2194695543188061e+00 -3.2440969716163992e+00
 -3.2686021919404373e+00 -3.2929856275570795e+00 -3.3172476937251578e+00 -3.3413888086416939e+00 -3.3654093933874067e+00
 -3.3893098718722254e+00 -3.4130906707808020e+00 -3.4367522195180240e+00 -3.4602949501545224e+00 -3.4837192973721884e+00
 -3.5070256984096826e+00 -3.5302145930079463e+00 -3.5532864233557158e+00 -3.5762416340350303e+00 -3.5990806719667483e+00
 -3.6218039863560572e+00 -3.6444120286379835e+00 -3.6669052524229087e+00 -3.6892841134420769e+00 -3.7115490694931093e+00
 -3.7337005803855154e+00 -3.7557391078862050e+00 -3.7776651156649987e+00 -3.7994790692401419e+00 -3.8211814359238145e+00
 -3.8427726847676453e+00 -3.8642532865082209e+00 -3.8856237135125995e+00 -3.9068844397238234e+00 -3.9280359406064265e+00
 -3.9490786930919524e+00 -3.9700131755244623e+00 -3.9908398676060468e+00 -4.0115592503423390e+00 -4.0321718059880274e+00
 -4.0526780179923634e+00 -4.0730783709446783e+00 -4.0933733505198928e+00 -4.1135634434240274e+00 -4.1336491373397175e+00
 -4.1536309208717226e+00 -4.1735092834924377e+00 -4.1932847154874100e+00 -4.2129577079008440e+00 -4.2325287524811177e+00
 -4.2519983416262939e+00 -4.2713669683296285e+00 -4.2906351261250908e+00 -4.3098033090328638e+00 -4.3288720115048669e+00
 -4.3478417283702600e+00 -4.3667129547809580e+00 -4.3854861861571450e+00 -4.4041619181327825e+00 -4.4227406465011239e+00
 -4.4412228671602225e+00 -4.4596090760584497e+00 -4.4778997691400013e+00 -4.4960954422904109e+00 -4.5141965912820634e+00
 -4.5322037117197027e+00 -4.5501172989859491e+00 -4.5679378481868076e+00 -4.5856658540971811e+00 -4.6033018111063804e+00
 -4.6208462131636363e+00 -4.6382995537236162e+00 -4.6556623256919298e+00 -4.6729350213706429e+00 -4.6901181324037884e+00
 -4.7072121497228832e+00 -4.7242175634924344e+00 -4.7411348630554517e+00 -4.7579645368789611e+00 -4.7747070724995186e+00
 -4.7913629564687161e+00 -4.8079326742986979e+00 -4.8244167104076743e+00 -4.8408155480654251e+00 -4.8571296693388204e+00
 -4.8733595550373288e+00 -4.8895056846585270e+00 -4.9055685363336181e+00 -4.9215485867729347e+00 -4.9374463112114597e+00
 -4.9532621833543296e+00 -4.9689966753223533e+00 -4.9846502575975196e+00 -5.0002233989685134e+00 -5.0157165664762218e+00
 -5.0311302253592487e+00 -5.0464648389994284e+00 -5.0617208688673365e+00 -5.0768987744677991e+00 -5.0919990132854078e+00
 -5.1070220407300297e+00 -5.1219683100823215e+00 -5.1368382724392383e+00 -5.1516323766595464e+00 -5.1663510693093375e+00
 -5.1809947946075372e+00 -5.1955639943714189e+00 -5.2100591079621150e+00 -5.2244805722301288e+00 -5.2388288214608467e+00
 -5.2531042873200491e+00 -5.2673073987994234e+00 -5.2814385821620737e+00 -5.2954982608880368e+00 -5.3094868556197898e+00
 -5.3234047841077627e+00 -5.3372524611558552e+00 -5.3510302985669389e+00 -5.3647387050883770e+00 -5.3783780863575359e+00
 -5.3919488448472928e+00 -5.4054513798115504e+00 -5.4188860872307476e+00 -5.4322533597573717e+00 -5.4455535866614726e+00
 -5.4587871537761679e+00 -5.4719544434437575e+00 -5.4850558344772784e+00 -5.4980917021612878e+00 -5.5110624182681072e+00
 -5.5239683510746520e+00 -5.5368098653792623e+00 -5.5495873225185415e+00 -5.5623010803841826e+00 -5.5749514934398059e+00
 -5.5875389127377906e+00 -5.6000636859361039e+00 -5.6125261573151404e+00 -5.6249266677945498e+00 -5.6372655549500701e+00
 -5.6495431530303630e+00 -5.6617597929738457e+00 -5.6739158024255225e+00 -5.6860115057538181e+00 -5.6980472240674107e+00
 -5.7100232752320652e+00 -5.7219399738874657e+00 -5.7337976314640482e+00 -5.7455965561998319e+00 -5.7573370531572561e+00
 -5.7690194242400077e+00 -5.7806439682098585e+00 -5.7922109807034943e+00 -5.8037207542493530e+00 -5.8151735782844494e+00
 -5.8265697391712168e+00 -5.8379095202143327e+00 -5.8491932016775561e+00 -5.8604210608005562e+00 -5.8715933718157522e+00
 -5.8827104059651365e+00 -5.8937724315171156e+00 -5.9047797137833404e+00 -5.9157325151355353e+00 -5.9266310950223371e+00
 -5.9374757099861242e+00 -5.9482666136798485e+00 -5.9590040568838720e+00 -5.9696882875227963e+00 -5.9803195506822959e+00
 -5.9908980886259533e+00 -6.0014241408120874e+00 -6.0118979439105917e+00 -6.0223197318197625e+00 -6.0326897356831344e+00
 -6.0430081839063128e+00 -6.0532753021738044e+00 -6.0634913134658532e+00 -6.0736564380752718e+00 -6.0837708936242736e+00
 -6.0938348950813070e+00 -6.1038486547778863e+00 -6.1138123824254276e+00 -6.1237262851320775e+00 -6.1335905674195494e+00
 -6.1434054312399553e+00 -6.1531710759926366e+00 -6.1628876985410006e+00 -6.1725554932293480e+00 -6.1821746518997145e+00
 -6.1917453639086917e+00 -6.2012678161442718e+00 -6.2107421930426705e+00 -6.2201686766051667e+00 -6.2295474464149327e+00
 -6.2388786796538653e+00 -6.2481625511194228e+00 -6.2573992332414541e+00 -6.2665888960990310e+00 -6.2757317074372860e+00
 -6.2848278326842406e+00 -6.2938774349676381e+00 -6.3028806751317799e+00 -6.3118377117543538e+00 -6.3207487011632697e+00
 -6.3296137974534945e+00 -6.3384331525038773e+00 -6.3472069159939917e+00 -6.3559352354209606e+00 -6.3646182561162945e+00
 -6.3732561212627203e+00 -6.3818489719110172e+00 -6.3903969469968489e+00 -6.3989001833575943e+00 -6.4073588157491823e+00
 -6.4157729768629244e+00 -6.4241427973423475e+00 -6.4324684058000239e+00 -6.4407499288344106e+00 -6.4489874910466742e+00
 -6.4571812150575294e+00 -6.4653312215240710e+00 -6.4734376291566038e+00 -6.4815005547354776e+00 -6.4895201131279210e+00
 -6.4974964173048706e+00 -6.5054295783578073e+00 -6.5133197055155900e+00 -6.5211669061612811e+00 -6.5289712858489892e+00
 -6.5367329483206964e+00 -6.5444519955230884e+00 -6.5521285276243955e+00 -6.5597626430312177e+00 -6.5673544384053608e+00
 -6.5749040086806705e+00 -6.5824114470798598e+00 -6.5898768451313510e+00 -6.5973002926860991e+00 -6.6046818779344285e+00
 -6.6120216874228692e+00 -6.6193198060709815e+00 -6.6265763171881984e+00 -6.6337913024906499e+00 -6.6409648421180014e+00
 -6.6480970146502836e+00 -6.6551878971247262e+00 -6.6622375650525933e+00 -6.6692460924360093e+00 -6.6762135517847998e+00
 -6.6831400141333175e+00 -6.6900255490572818e+00 -6.6968702246906044e+00 -6.7036741077422288e+00 -6.7104372635129579e+00
 -6.7171597559122889e+00 -6.7238416474752469e+00 -6.7304829993792161e+00 -6.7370838714607748e+00 -6.7436443222325249e+00
 -6.7501644088999271e+00 -6.7566441873781349e+00 -6.7630837123088225e+00 -6.7694830370770234e+00 -6.7758422138279606e+00
 -6.7821612934838766e+00 -6.7884403257608721e+00 -6.7946793591857331e+00 -6.8008784411127685e+00 -6.8070376177406402e+00
 -6.8131569341291938e+00 -6.8192364342162977e+00 -6.8252761608346697e+00 -6.8312761557287134e+00 -6.8372364595713488e+00
 -6.8431571119808483e+00 -6.8490381515376644e+00 -6.8548796158012664e+00 -6.8606815413269757e+00 -6.8664439636827890e+00
 -6.8721669174662221e+00 -6.8778504363211361e+00 -6.8834945529545717e+00 -6.8890992991535835e+00 -6.8946647058020698e+00
 -6.9001908028976100e+00 -6.9056776195682898e+00 -6.9111251840895438e+00 -6.9165335239009806e+00 -6.9219026656232190e+00
 -6.9272326350747182e+00 -6.9325234572886165e+00 -6.9377751565295558e+00 -6.9429877563105213e+00 -6.9481612794096712e+00
 -6.9532957478871689e+00 -6.9583911831020178e+00 -6.9634476057288932e+00 -6.9684650357749733e+00 -6.9734434925967772e+00
 -6.9783829949169922e+00 -6.9832835608413069e+00 -6.9881452078752506e+00 -6.9929679529410151e+00 -6.9977518123942986e+00
 -7.0024968020411311e+00 -7.0072029371547124e+00 -7.0118702324922371e+00 -7.0164987023117380e+00 -7.0210883603889087e+00
 -7.0256392200339448e+00 -7.0301512941083697e+00 -7.0346245950418744e+00 -7.0390591348491443e+00 -7.0434549251466931e+00
 -7.0478119771696983e+00 -7.0521303017888322e+00 -7.0564099095270958e+00 -7.0606508105766501e+00 -7.0648530148156485e+00
 -7.0690165318250715e+00 -7.0731413709055602e+00 -7.0772275410942438e+00 -7.0812750511815814e+00 -7.0852839097281839e+00
 -7.0892541250816565e+00 -7.0931857053932736e+00 -7.0970786586307026e+00 -7.1009329925806686e+00 -7.1047487148476698e+00
 -7.1085258328525338e+00 -7.1122643538309696e+00 -7.1159642848321321e+00 -7.1196256327171756e+00 -7.1232484041578106e+00
 -7.1268326056348643e+00 -7.1303782434368346e+00 -7.1338853236584505e+00 -7.1373538521992268e+00 -7.1407838347620229e+00
 -7.1441752768516009e+00 -7.1475281837731810e+00 -7.1508425606309993e+00 -7.1541184123268682e+00 -7.1573557435587292e+00
 -7.1605545588192125e+00 -7.1637148623941957e+00 -7.1668366583613592e+00 -7.1699199505887430e+00 -7.1729647427333063e+00
 -7.1759710382394850e+00 -7.1789388403377448e+00 -7.1818681520431449e+00 -7.1847589761538906e+00 -7.1876113152498915e+00
 -7.1904251716913210e+00 -7.1932005476171721e+00 -7.1959374449438149e+00 -7.1986358653635518e+00 -7.2012958103431819e+00
 -7.2039172811225480e+00 -7.2065002787131043e+00 -7.2090448038964663e+00 -7.2115508572229716e+00 -7.2140184390102364e+00
 -7.2164475493417148e+00 -7.2188381880652503e+00 -7.2211903547916432e+00 -7.2235040488931963e+00 -7.2257792695022820e+00
 -7.2280160155098931e+00 -7.2302142855642062e+00 -7.2323740780691326e+00 -7.2344953911828798e+00 -7.2365782228165072e+00
 -7.2386225706324865e+00 -7.2406284320432537e+00 -7.2425958042097713e+00 -7.2445246840400834e+00 -7.2464150681878738e+00
 -7.2482669530510222e+00 -7.2500803347701641e+00 -7.2518552092272452e+00 -7.2535915720440798e+00 -7.2552894185809107e+00
 -7.2569487439349620e+00 -7.2585695429390009e+00 -7.2601518101598908e+00 -7.2616955398971532e+00 -7.2632007261815215e+00
 -7.2646673627734994e+00 -7.2660954431619205e+00 -7.2674849605625012e+00 -7.2688359079164018e+00 -7.2701482778887829e+00
 -7.2714220628673623e+00 -7.2726572549609738e+00 -7.2738538459981203e+00 -7.2750118275255380e+00 -7.2761311908067485e+00
 -7.2772119268206161e+00 -7.2782540262599094e+00 -7.2792574795298552e+00 -7.2802222767466960e+00 -7.2811484077362492e+00
 -7.2820358620324637e+00 -7.2828846288759754e+00 -7.2836946972126668e+00 -7.2844660556922260e+00 -7.2851986926666985e+00
 -7.2858925961890488e+00 -7.2865477540117194e+00 -7.2871641535851825e+00 -7.2877417820565018e+00 -7.2882806262678885e+00
 -7.2887806727552604e+00 -7.2892419077467938e+00 -7.2896643171614892e+00 -7.2900478866077210e+00 -7.2903926013818001e+00
 -7.2906984464665276e+00 -7.2909654065297556e+00 -7.2911934659229409e+00 -7.2913826086797062e+00 -7.2915328185143951e+00
 -7.2916440788206289e+00 -7.2917163726698666e+00 -7.2917496828099591e+00 -7.2917439916637088e+00 -7.2916992813274275e+00
 -7.2916155335694910e+00 -7.2914927298288994e+00 -7.2913308512138331e+00 -7.2911298785002083e+00 -7.2908897921302396e+00
 -7.2906105722109906e+00 -7.2902921985129385e+00 -7.2899346504685250e+00 -7.2895379071707174e+00 -7.2891019473715648e+00
 -7.2886267494807564e+00 -7.2881122915641781e+00 -7.2875585513424692e+00 -7.2869655061895804e+00 -7.2863331331313326e+00
 -7.2856614088439722e+00 -7.2849503096527286e+00 -7.2841998115303745e+00 -7.2834098900957791e+00 -7.2825805206124663e+00
 -7.2817116779871771e+00 -7.2808033367684182e+00 -7.2798554711450292e+00 -7.2788680549447307e+00 -7.2778410616326887e+00
 -7.2767744643100682e+00 -7.2756682357125921e+00 -7.2745223482090973e+00 -7.2733367738000938e+00 -7.2721114841163210e+00
 -7.2708464504173040e+00 -7.2695416435899149e+00 -7.2681970341469260e+00 -7.2668125922255671e+00 -7.2653882875860862e+00
 -7.2639240896103052e+00 -7.2624199673001772e+00 -7.2608758892763436e+00 -7.2592918237766915e+00 -7.2576677386549120e+00
 -7.2560036013790556e+00 -7.2542993790300923e+00 -7.2525550383004660e+00 -7.2507705454926565e+00 -7.2489458665177304e+00
 -7.2470809668939040e+00 -7.2451758117450975e+00 -7.2432303657994934e+00 -7.2412445933880951e+00 -7.2392184584432826e+00
 -7.2371519244973692e+00 -7.2350449546811619e+00 -7.2328975117225154e+00 -7.2307095579448921e+00 -7.2284810552659176e+00
 -7.2262119651959393e+00 -7.2239022488365841e+00 -7.2215518668793131e+00 -7.2191607796039818e+00 -7.2167289468773967e+00
 -7.2142563281518743e+00 -7.2117428824637937e+00 -7.2091885684321575e+00 -7.2065933442571515e+00 -7.2039571677186958e+00
 -7.2012799961750069e+00 -7.1985617865611546e+00 -7.1958024953876185e+00 -7.1930020787388438e+00 -7.1901604922718025e+00
 -7.1872776912145468e+00 -7.1843536303647690e+00 -7.1813882640883593e+00 -7.1783815463179597e+00 -7.1753334305515253e+00
 -7.1722438698508801e+00 -7.1691128168402747e+00 -7.1659402237049417e+00 -7.1627260421896564e+00 -7.1594702235972916e+00
 -7.1561727187873752e+00 -7.1528334781746512e+00 -7.1494524517276306e+00 -7.1460295889671537e+00 -7.1425648389649474e+00
 -7.1390581503421791e+00 -7.1355094712680183e+00 -7.1319187494581895e+00 -7.1282859321735339e+00 -7.1246109662185653e+00
 -7.1208937979400240e+00 -7.1171343732254408e+00 -7.1133326375016894e+00 -7.1094885357335444e+00 -7.1056020124222403e+00
 -7.1016730116040279e+00 -7.0977014768488935e+00 -7.0936873512635117e+00 -7.0896305775049271e+00 -7.0855310977984720e+00
 -7.0813888539558443e+00 -7.0772037873931843e+00 -7.0729758391491551e+00 -7.0687049499030179e+00 -7.0643910599927118e+00
 -7.0600341094329320e+00 -7.0556340379332072e+00 -7.0511907849159750e+00 -7.0467042895346665e+00 -7.0421744906917780e+00
 -7.0376013270569509e+00 -7.0329847370850533e+00 -7.0283246590342516e+00 -7.0236210309840947e+00 -7.0188737908535872e+00
 -7.0140828764192698e+00 -7.0092482253332982e+00 -7.0043697751415195e+00 -6.9994474633015509e+00 -6.9944812272008559e+00
 -6.9894710041748276e+00 -6.9844167315248589e+00 -6.9793183465364272e+00 -6.9741757864971694e+00 -6.9689889887149619e+00
 -6.9637578905359954e+00 -6.9584824293628547e+00 -6.9531625426725983e+00 -6.9477981680348346e+00 -6.9423892431297993e+00
 -6.9369357057664356e+00 -6.9314374939004706e+00 -6.9258945456524943e+00 -6.9203067993260357e+00 -6.9146741934256442e+00
 -6.9089966666749643e+00 -6.9032741580348160e+00 -6.8975066067212714e+00 -6.8916939522237328e+00 -6.8858361343230126e+00
 -6.8799330931094085e+00 -6.8739847690007831e+00 -6.8679911027606426e+00 -6.8619520355162136e+00 -6.8558675087765213e+00
 -6.8497374644504676e+00 -6.8435618448649107e+00 -6.8373405927827395e+00 -6.8310736514209554e+00 -6.8247609644687488e+00
 -6.8184024761055770e+00 -6.8119981310192417e+00 -6.8055478744239695e+00 -6.7990516520784849e+00 -6.7925094103040955e+00
 -6.7859210960027641e+00 -6.7792866566751879e+00 -6.7726060404388795e+00 -6.7658791960462406e+00 -6.7591060729026449e+00
 -6.7522866210845107e+00 -6.7454207913573843e+00 -6.7385085351940139e+00 -6.7315498047924294e+00 -6.7245445530940211e+00
 -6.7174927338016150e+00 -6.7103943013975558e+00 -6.7032492111617783e+00 -6.6960574191898914e+00 -6.6888188824112538e+00
 -6.6815335586070503e+00 -6.6742014064283719e+00 -6.6668223854142958e+00 -6.6593964560099570e+00 -6.6519235795846345e+00
 -6.6444037184498228e+00 -6.6368368358773129e+00 -6.6292228961172688e+00 -6.6215618644163099e+00 -6.6138537070355810e+00
 -6.6060983912688389e+00 -6.5982958854605247e+00 -6.5904461590238430e+00 -6.5825491824588438e+00 -6.5746049273704941e+00
 -6.5666133664867594e+00 -6.5585744736766838e+00 -6.5504882239684630e+00 -6.5423545935675289e+00 -6.5341735598746187e+00
 -6.5259451015038623e+00 -6.5176691983008546e+00 -6.5093458313607355e+00 -6.5009749830462651e+00 -6.4925566370059080e+00
 -6.4840907781919048e+00 -6.4755773928783542e+00 -6.4670164686792866e+00 -6.4584079945667501e+00 -6.4497519608888805e+00
 -6.4410483593879810e+00 -6.4322971832186049e+00 -6.4234984269656294e+00 -6.4146520866623336e+00 -6.4057581598084781e+00
 -6.3968166453883830e+00 -6.3878275438890046e+00 -6.3787908573180152e+00 -6.3697065892218792e+00 -6.3605747447039329e+00
 -6.3513953304424620e+00 -6.3421683547087788e+00 -6.3328938273853002e+00 -6.3235717599836283e+00 -6.3142021656626248e+00
 -6.3047850592464911e+00 -6.2953204572428465e+00 -6.2858083778608052e+00 -6.2762488410290560e+00 -6.2666418684139380e+00
 -6.2569874834375190e+00 -6.2472857112956772e+00 -6.2375365789761741e+00 -6.2277401152767347e+00 -6.2178963508231275e+00
 -6.2080053180872392e+00 -6.1980670514051539e+00 -6.1880815869952341e+00 -6.1780489629761934e+00 -6.1679692193851769e+00
 -6.1578423981958421e+00 -6.1476685433364331e+00 -6.1374477007078596e+00 -6.1271799182017768e+00 -6.1168652457186585e+00
 -6.1065037351858829e+00 -6.0960954405758034e+00 -6.0856404179238304e+00 -6.0751387253465081e+00 -6.0645904230595944e+00
 -6.0539955733961355e+00 -6.0433542408245469e+00 -6.0326664919666895e+00 -6.0219323956159503e+00 -6.0111520227553168e+00
 -6.0003254465754576e+00 -5.9894527424928006e+00 -5.9785339881676087e+00 -5.9675692635220612e+00 -5.9565586507583275e+00
 -5.9455022343766490e+00 -5.9344001011934173e+00 -5.9232523403592463e+00 -5.9120590433770595e+00 -5.9008203041201606e+00
 -5.8895362188503135e+00 -5.8782068862358230e+00 -5.8668324073696079e+00 -5.8554128857872847e+00 -5.8439484274852420e+00
 -5.8324391409387175e+00 -5.8208851371198804e+00 -5.8092865295159060e+00 -5.7976434341470533e+00 -5.7859559695847471e+00
 -5.7742242569696511e+00 -5.7624484200297488e+00 -5.7506285850984211e+00 -5.7387648811325240e+00 -5.7268574397304661e+00
 -5.7149063951502894e+00 -5.7029118843277429e+00 -5.6908740468943630e+00 -5.6787930251955547e+00 -5.6666689643086618e+00
 -5.6545020120610525e+00 -5.6422923190481944e+00 -5.6300400386517317e+00 -5.6177453270575652e+00 -5.6054083432739281e+00
 -5.5930292491494660e+00 -5.5806082093913147e+00 -5.5681453915831760e+00 -5.5556409662033985e+00 -5.5430951066430554e+00
 -5.5305079892240210e+00 -5.5178797932170491e+00 -5.5052107008598519e+00 -5.4925008973751774e+00 -5.4797505709888874e+00
 -5.4669599129480346e+00 -5.4541291175389457e+00 -5.4412583821052909e+00 -5.4283479070661675e+00 -5.4153978959341798e+00
 -5.4024085553335119e+00 -5.3893800950175068e+00 -5.3763127278732181e+00 -5.3632066698928931e+00 -5.3500621401324313e+00
 -5.3368793606693368e+00 -5.3236585565606811e+00 -5.3103999558010555e+00 -5.2971037892805262e+00 -5.2837702907425950e+00
 -5.2703996967421531e+00 -5.2569922466034376e+00 -5.2435481823779888e+00 -5.2300677488026066e+00 -5.2165511932573061e+00
 -5.2029987657232741e+00 -5.1894107187408283e+00 -5.1757873073673686e+00 -5.1621287891353385e+00 -5.1484354240101791e+00
 -5.1347074743482848e+00 -5.1209452048549622e+00 -5.1071488825423863e+00 -5.0933187766875534e+00 -5.0794551587902417e+00
 -5.0655583025309658e+00 -5.0516284837289342e+00 -5.0376659803000043e+00 -5.0236710722146398e+00 -5.0096440414558669e+00
 -4.9955851719772308e+00 -4.9814947496607536e+00 -4.9673730622748877e+00 -4.9532203994324746e+00 -4.9390370525486995e+00
 -4.9248233147990526e+00 -4.9105794810772769e+00 -4.8963058479533332e+00 -4.8820027136313522e+00 -4.8676703779075909e+00
 -4.8533091421283920e+00 -4.8389193091481353e+00 -4.8245011832872002e+00 -4.8100550702899163e+00 -4.7955812772825261e+00
 -4.7810801127311340e+00 -4.7665518863996699e+00 -4.7519969093078416e+00 -4.7374154936890918e+00 -4.7228079529485560e+00
 -4.7081746016210158e+00 -4.6935157553288596e+00 -4.6788317307400362e+00 -4.6641228455260118e+00 -4.6493894183197275e+00
 -4.6346317686735539e+00 -4.6198502170172482e+00 -4.6050450846159130e+00 -4.5902166935279496e+00 -4.5753653665630143e+00
 -4.5604914272399792e+00 -4.5455951997448825e+00 -4.5306770088888904e+00 -4.5157371800662505e+00 -4.5007760392122487e+00
 -4.4857939127611663e+00 -4.4707911276042358e+00 -4.4557680110475992e+00 -4.4407248907702606e+00 -4.4256620947820480e+00
 -4.4105799513815622e+00 -4.3954787891141436e+00 -4.3803589367298175e+00 -4.3652207231412596e+00 -4.3500644773817481e+00
 -4.3348905285631201e+00 -4.3196992058337278e+00 -4.3044908383363989e+00 -4.2892657551663875e+00 -4.2740242853293351e+00
 -4.2587667576992239e+00 -4.2434935009763350e+00 -4.2282048436452042e+00 -4.2129011139325794e+00 -4.1975826397653737e+00
 -4.1822497487286281e+00 -4.1669027680234620e+00 -4.1515420244250327e+00 -4.1361678442404912e+00 -4.1207805532669379e+00
 -4.1053804767493798e+00 -4.0899679393386865e+00 -4.0745432650495506e+00 -4.0591067772184353e+00 -4.0436587984615402e+00
 -4.0281996506327502e+00 -4.0127296547815998e+00 -3.9972491311112224e+00 -3.9817583989363086e+00 -3.9662577766410667e+00
 -3.9507475816371738e+00 -3.9352281303217351e+00 -3.9196997380352414e+00 -3.9041627190195216e+00 -3.8886173863757025e+00
 -3.8730640520221651e+00 -3.8575030266524992e+00 -3.8419346196934612e+00 -3.8263591392629306e+00 -3.8107768921278655e+00
 -3.7951881836622610e+00 -3.7795933178051024e+00 -3.7639925970183250e+00 -3.7483863222447691e+00 -3.7327747928661359e+00
 -3.7171583066609450e+00 -3.7015371597624900e+00 -3.6859116466167965e+00 -3.6702820599405763e+00 -3.6546486906791849e+00
 -3.6390118279645796e+00 -3.6233717590732724e+00 -3.6077287693842903e+00 -3.5920831423371284e+00 -3.5764351593897086e+00
 -3.5607850999763366e+00 -3.5451332414656545e+00 -3.5294798591186014e+00 -3.5138252260463689e+00 -3.4981696131683564e+00
 -3.4825132891701269e+00 -3.4668565204613673e+00 -3.4511995711338397e+00 -3.4355427029193413e+00 -3.4198861751476608e+00
 -3.4042302447045336e+00 -3.3885751659895980e+00 -3.3729211908743535e+00 -3.3572685686601149e+00 -3.3416175460359705e+00
 -3.3259683670367384e+00 -3.3103212730009219e+00 -3.2946765025286675e+00 -3.2790342914397197e+00 -3.2633948727313782e+00
 -3.2477584765364549e+00 -3.2321253300812303e+00 -3.2164956576434087e+00 -3.2008696805100749e+00 -3.1852476169356532e+00
 -3.1696296820998597e+00 -3.1540160880656631e+00 -3.1384070437372373e+00 -3.1228027548179202e+00 -3.1072034237681700e+00
 -3.0916092497635201e+00 -3.0760204286525381e+00 -3.0604371529147794e+00 -3.0448596116187456e+00 -3.0292879903798409e+00
 -3.0137224713183270e+00 -2.9981632330172823e+00 -2.9826104504805548e+00 -2.9670642950907218e+00 -2.9515249345670447e+00
 -2.9359925329234251e+00 -2.9204672504263622e+00 -2.9049492435529105e+00 -2.8894386649486319e+00 -2.8739356633855575e+00
 -2.8584403837201409e+00 -2.8429529668512141e+00 -2.8274735496779466e+00 -2.8120022650578003e+00 -2.7965392417644854e+00
 -2.7810846044459177e+00 -2.7656384735821748e+00 -2.7502009654434536e+00 -2.7347721920480246e+00 -2.7193522611201910e+00
 -2.7039412760482420e+00 -2.6885393358424117e+00 -2.6731465350928358e+00 -2.6577629639275058e+00 -2.6423887079702273e+00
 -2.6270238482985762e+00 -2.6116684614018539e+00 -2.5963226191390465e+00 -2.5809863886967772e+00 -2.5656598325472673e+00
 -2.5503430084062884e+00 -2.5350359691911231e+00 -2.5197387629785166e+00 -2.5044514329626377e+00 -2.4891740174130335e+00
 -2.4739065496325838e+00 -2.4586490579154612e+00 -2.4434015655050856e+00 -2.4281640905520803e+00 -2.4129366460722288e+00
 -2.3977192399044345e+00
  1.0000000000000000e+00  1.0000004121435471e+00  9.9999999119301186e-01  9.9999869343527148e-01  9.9999640521669497e-01
  9.9999291001907153e-01  9.9998788321315113e-01  9.9998093211351957e-01  9.9997164730785337e-01  9.9995965003025555e-01
  9.9994460764019921e-01  9.9992621507578094e-01  9.9990417116623920e-01  9.9987815863158991e-01  9.9984784131681603e-01
  9.9981287342844860e-01  9.9977290974768285e-01  9.9972761307203672e-01  9.9967665358867874e-01  9.9961970460978378e-01
  9.9955643824702267e-01  9.9948652291171014e-01  9.9940962422448421e-01  9.9932540690395188e-01  9.9923353655861047e-01
  9.9913368040367945e-01  9.9902550667240442e-01  9.9890868379613040e-01  9.9878287968844748e-01  9.9864776159954405e-01
  9.9850299642284679e-01  9.9834825104722680e-01  9.9818319262741584e-01  9.9800748858070476e-01  9.9782080644258853e-01
  9.9762281371704775e-01  9.9741317778265626e-01  9.9719156591780345e-01  9.9695764536523890e-01  9.9671108339458447e-01
  9.9645154733086416e-01  9.9617870453604385e-01  9.9589222238088115e-01  9.9559176821963036e-01  9.9527700938334007e-01
  9.9494761318993952e-01  9.9460324695636493e-01  9.9424357800830265e-01  9.9386827368073583e-01  9.9347700131308092e-01
  9.9306942824401379e-01  9.9264522180798631e-01  9.9220404933586470e-01  9.9174557815713082e-01  9.9126947560205625e-01
  9.9077540900281325e-01  9.9026304569291013e-01  9.8973205300622613e-01  9.8918209827612225e-01  9.8861284883515121e-01
  9.8802397201538550e-01  9.8741513514883295e-01  9.8678600556778528e-01  9.8613625060486132e-01  9.8546553759284639e-01
  9.8477353386451560e-01  9.8405990675250687e-01  9.8332432358933108e-01  9.8256645170744183e-01  9.8178595843930661e-01
  9.8098251111744861e-01  9.8015577707444035e-01  9.7930542364288131e-01  9.7843111815537742e-01  9.7753252794452272e-01
  9.7660932034288639e-01  9.7566116268299929e-01  9.7468772229734857e-01  9.7368866651840502e-01  9.7266366267867843e-01
  9.7161237811077306e-01  9.7053448014741028e-01  9.6942963612134114e-01  9.6829751336520520e-01  9.6713777921139321e-01
  9.6595010099203760e-01  9.6473414603926733e-01  9.6348958168554533e-01  9.6221607526396780e-01  9.6091329410814341e-01
  9.5958090555151254e-01  9.5821857692655765e-01  9.5682597556421822e-01  9.5540276879453367e-01  9.5394862394835844e-01
  9.5246320835918430e-01  9.5094618936408315e-01  9.4939723430139622e-01  9.4781601050658104e-01  9.4620218530807954e-01
  9.4455542602651132e-01  9.4287539998166670e-01  9.4116177450234051e-01  9.3941421693534521e-01  9.3763239464334747e-01
  9.3581597498574898e-01  9.3396462529570001e-01  9.3207801286186953e-01  9.3015580494394767e-01  9.2819766882154209e-01
  9.2620327184739815e-01  9.2417228147907660e-01  9.2210436521867678e-01  9.1999919049317935e-01  9.1785642453300931e-01
  9.1567573433507543e-01  9.1345678685294618e-01  9.1119924928177021e-01  9.0890278932708934e-01  9.0656707517968393e-01
  9.0419177498177827e-01  9.0177655615891761e-01  8.9932108486051920e-01  8.9682502631669248e-01  8.9428804622746383e-01
  8.9170981231436375e-01  8.8908999535156608e-01  8.8642826762196325e-01  8.8372429947849507e-01  8.8097775578408577e-01
  8.7818829447546498e-01  8.7535557168027611e-01  8.7247924996096604e-01  8.6955900628811167e-01  8.6659453235936745e-01
  8.6358551979910536e-01  8.6053164075479072e-01  8.5743253091171356e-01  8.5428779715983516e-01  8.5109705688296355e-01
  8.4785998314673827e-01  8.4457633749032501e-01  8.4124593126383951e-01  8.3786852709773196e-01  8.3444373475833333e-01
  8.3097095979913771e-01  8.2744953957941270e-01  8.2387898139710358e-01  8.2025919792804292e-01  8.1659054541694476e-01
  8.1287341650154021e-01  8.0910767721541443e-01  8.0529215580465419e-01  8.0142478838381437e-01  7.9750372432292727e-01
  7.9352864110341126e-01  7.8950176862897392e-01  7.8542694901419641e-01  7.8130682286070730e-01  7.7713978783483706e-01
  7.7291825409185699e-01  7.6863220845763780e-01  7.6427607937037978e-01  7.5985566394460180e-01  7.5539002566569768e-01
  7.5090039148126919e-01  7.4639383415907112e-01  7.4184799801975421e-01  7.3721315190998049e-01  7.3244310395281431e-01
  7.2753342582290337e-01  7.2255299996340761e-01  7.1762208857945453e-01  7.1283235786992893e-01  7.0815824409924277e-01
  7.0339959470529889e-01  6.9827252368723258e-01  6.9260529612178923e-01  6.8654015967665294e-01  6.8061547669005640e-01
  6.7549299205922220e-01  6.7152220666515805e-01  6.6830860229383893e-01  6.6447940257238292e-01  6.5782482486123861e-01
  6.5279865475804411e-01  6.5680192849583763e-01  6.6032434465789935e-01  6.6336732070089910e-01  6.6593299586560228e-01
  6.6802420913022276e-01  6.6964447716377717e-01  6.7079797227943827e-01  6.7148950038788802e-01  6.7172447895067144e-01
  6.7150891493355047e-01  6.7084938275985673e-01  6.6975300226384593e-01  6.6822741664405061e-01  6.6628077041663403e-01
  6.6392168736874402e-01  6.6115924851186569e-01  6.5800297003517583e-01  6.5446278125889601e-01  6.5054900258764592e-01
  6.4627232346379737e-01  6.4164378032082769e-01  6.3667473453667278e-01  6.3137685038708136e-01  6.2576207299896813e-01
  6.1984260630376720e-01  6.1363089099078583e-01  6.0713958246055799e-01  6.0038152877819762e-01  5.9336974862675240e-01
  5.8611740926055733e-01  5.7863780445858803e-01  5.7094433247781429e-01  5.6305047400655395e-01  5.5496977011782600e-01
  5.4671580022270438e-01  5.3830216002367126e-01  5.2974243946797106e-01  5.2105020070096342e-01  5.1223895601947678e-01
  5.0332214582516255e-01  4.9431311657784788e-01  4.8522509874888958e-01  4.7607118477452759e-01  4.6686430700923853e-01
  4.5761721567908908e-01  4.4834245683508961e-01  4.3905235030654799e-01  4.2975896765442245e-01  4.2047411012467578e-01
  4.1120928660162881e-01  4.0197569156131324e-01  3.9278418302482604e-01  3.8364526051168235e-01  3.7456904299316945e-01
  3.6556524684569991e-01  3.5664316380416583e-01  3.4781163891529093e-01  3.3907904849100240e-01  3.3045327859831386e-01
  3.2194171276540046e-01  3.1355123751934383e-01  3.0528825324017361e-01  2.9715868514225008e-01  2.8916799425564682e-01
  2.8132118840753301e-01  2.7362283320355629e-01  2.6607706300922507e-01  2.5868759193129115e-01  2.5145772479913242e-01
  2.4439036814613518e-01  2.3748804119107675e-01  2.3075288681950817e-01  2.2418668256513657e-01  2.1779085159120781e-01
  2.1156647367188902e-01  2.0551429617365116e-01  1.9963474503665155e-01  1.9392793575611639e-01  1.8839368436372339e-01
  1.8303151840898427e-01  1.7784068794062730e-01  1.7282017648797990e-01  1.6796871204235114e-01  1.6328477803841429e-01
  1.5876662433558944e-01  1.5441227819942605e-01  1.5021955528298533e-01  1.4618607060822289e-01  1.4230924954737154e-01
  1.3858633880432339e-01  1.3501441739601269e-01  1.3159040763379842e-01  1.2831108610484659e-01  1.2517309465351309e-01
  1.2217295136272593e-01  1.1930706153536805e-01  1.1657172867565974e-01  1.1396316547054125e-01  1.1147750477105531e-01
  1.0911081057372965e-01  1.0685908900195959e-01  1.0471829928739068e-01  1.0268436475130102e-01  1.0075318378598400e-01
  9.8920640836130808e-02  9.7182617380212999e-02  9.5535002911864980e-02  9.3973705921266582e-02  9.2494664876525662e-02
  9.1093859205060634e-02  8.9767320274982909e-02  8.8511142376479723e-02  8.7321493703196307e-02  8.6194627333618712e-02
  8.5126892212456506e-02  8.4114744132024577e-02  8.3154756647605951e-02  8.2243629629362255e-02  8.1378190544788925e-02
  8.0555392282958382e-02  7.9772310800691040e-02  7.9026142768725244e-02  7.8314203217887235e-02  7.7633923185261175e-02
  7.6982847360358986e-02  7.6358631731290372e-02  7.5759041230932758e-02  7.5181947383101272e-02  7.4625325948718652e-02
  7.4087254571985228e-02  7.3565910426548919e-02  7.3059567861675098e-02  7.2566596048416601e-02  7.2085456625783709e-02
  7.1614701346914042e-02  7.1152969725242543e-02  7.0698986680671455e-02  7.0251560185740233e-02  6.9809578911795539e-02
  6.9372009875161150e-02  6.8937896083307984e-02  6.8506354181023993e-02  6.8076572096584118e-02  6.7647806687920295e-02
  6.7219381388791369e-02  6.6790683854953070e-02  6.6361163610327956e-02  6.5930329693175360e-02  6.5497748302261349e-02
  6.5063040443028727e-02  6.4625879573766920e-02  6.4185989251781955e-02  6.3743140779566443e-02  6.3297150850969514e-02
  6.2847879197366729e-02  6.2395226233830148e-02  6.1939130705298155e-02  6.1479567332745490e-02  6.1016544459353200e-02
  6.0550101696678571e-02  6.0080307570825102e-02  5.9607257168612440e-02  5.9131069783746354e-02  5.8651886562988691e-02
  5.8169868152327303e-02  5.7685192343146049e-02  5.7198051718394705e-02  5.6708651298758968e-02  5.6217206188830304e-02
  5.5723939223276120e-02  5.5229078613009415e-02  5.4732855591359042e-02  5.4235502060239416e-02  5.3737248236320680e-02
  5.3238320299746678e-02  5.2738938284821707e-02  5.2239315185321780e-02  5.1739656966549898e-02  5.1240162665397493e-02
  5.0741024490499789e-02  5.0242427922391121e-02  4.9744551813660220e-02  4.9247568489105567e-02  4.8751643845890695e-02
  4.8256937453699515e-02  4.7763602654891650e-02  4.7271786664657721e-02  4.6781630671174704e-02  4.6293269935761217e-02
  4.5806833893032861e-02  4.5322446251057559e-02  4.4840225091510817e-02  4.4360282969831098e-02  4.3882727015375128e-02
  4.3407659031573197e-02  4.2935175596084500e-02  4.2465368160952456e-02  4.1998323152760024e-02  4.1534122072785007e-02
  4.1072841597155400e-02  4.0614553677004693e-02  4.0159325638627189e-02  3.9707220283633354e-02  3.9258295989105081e-02
  3.8812606807751060e-02  3.8370202568062076e-02  3.7931128974466342e-02  3.7495427707484791e-02  3.7063136523886431e-02
  3.6634289356843652e-02  3.6208916416087533e-02  3.5787044288063168e-02  3.5368696036085015e-02  3.4953891300492160e-02
  3.4542646398803695e-02  3.4134974425873987e-02  3.3730885354048057e-02  3.3330386133316833e-02  3.2933480791472527e-02
  3.2540170534263904e-02  3.2150453845551666e-02  3.1764326587463691e-02  3.1381782100550433e-02  3.1002811303940191e-02
  3.0627402795494453e-02  3.0255542951963189e-02  2.9887216029140209e-02  2.9522404262018458e-02  2.9161087964945334e-02
  2.8803245631778027e-02  2.8448854036038820e-02  2.8097888331070412e-02  2.7750322150186916e-02  2.7406127704895533e-02
  2.7065275866576421e-02  2.6727736228924590e-02  2.6393477167140019e-02  2.6062465897094923e-02  2.5734668534500994e-02
  2.5410050154076661e-02  2.5088574848714310e-02  2.4770205788647574e-02  2.4454905280618541e-02  2.4142634827045036e-02
  2.3833355185187852e-02  2.3527026426318001e-02  2.3223607994883967e-02  2.2923058767678951e-02  2.2625337113008123e-02
  2.2330400949855871e-02  2.2038207807053050e-02  2.1748714882444224e-02  2.1461879102054923e-02  2.1177657179258891e-02
  2.0896005673945332e-02  2.0616881051686162e-02  2.0340239742903256e-02  2.0066038202035688e-02  1.9794232966707008e-02
  1.9524780716892454e-02  1.9257638334086221e-02  1.8992762960468722e-02  1.8730112058073803e-02  1.8469643467956029e-02
  1.8211315469357905e-02  1.7955086838877136e-02  1.7700916909633879e-02  1.7448765630437992e-02  1.7198593624956262e-02
  1.6950362250879696e-02  1.6704033659090720e-02  1.6459570852830469e-02  1.6216937746866014e-02  1.5976099226657624e-02
  1.5737021207526000e-02  1.5499670693819528e-02  1.5264015838081540e-02  1.5030026000217550e-02  1.4797671806662508e-02
  1.4566925209548049e-02  1.4337759545869740e-02  1.4110149596654336e-02  1.3884071646127009e-02  1.3659503540878625e-02
  1.3436424749032968e-02  1.3214816419414011e-02  1.2994661440713146e-02  1.2775944500656439e-02  1.2558652145171887e-02
  1.2342772837556651e-02  1.2128297017644151e-02  1.1915217158673323e-02  1.1703527788069502e-02  1.1493225442589038e-02
  1.1284308605137572e-02  1.1076777641199376e-02  1.0870634735266685e-02  1.0665883827269029e-02  1.0462530549002569e-02
  1.0260582160559431e-02  1.0060047486757038e-02  9.8609368535674466e-03  9.6632620245466778e-03  9.4670361372640507e-03
  9.2722736397315222e-03  9.0789902268330128e-03  8.8872027767537467e-03  8.6969292874095796e-03  8.5081888128763390e-03
  8.3210013998191550e-03  8.1353880239217954e-03  7.9513705263159935e-03  7.7689715500107899e-03  7.5882144763218659e-03
  7.4091233613008713e-03  7.2317228721647617e-03  7.0560382237251336e-03  6.8820951148175569e-03  6.7099196647309092e-03
  6.5395383496367077e-03  6.3709779390184445e-03  6.2042654321009241e-03  6.0394279942795892e-03  5.8764928935498614e-03
  5.7154874369364731e-03  5.5564389069227976e-03  5.3993744978801921e-03  5.2443212524973214e-03  5.0913059982094968e-03
  4.9403552836280087e-03  4.7914953149694635e-03  4.6447518924851118e-03  4.5001503468901881e-03  4.3577154757932389e-03
  4.2174714801254641e-03  4.0794419005700400e-03  3.9436495539914660e-03  3.8101164698648854e-03  3.6788638267054325e-03
  3.5499118884975544e-03  3.4232799411243534e-03  3.2989862287969140e-03  3.1770478904836457e-03  3.0574808963396045e-03
  2.9402999841358409e-03  2.8255185956887214e-03  2.7131488132892696e-03  2.6032012961324982e-03  2.4956852167467396e-03
  2.3906081979727669e-03  2.2879762675688301e-03  2.1877938636467122e-03  2.0900638628229841e-03  1.9947876094342761e-03
  1.9019649447525534e-03  1.8115942362003910e-03  1.7236724065662493e-03  1.6381949632197465e-03  1.5551560273269352e-03
  1.4745483630655772e-03  1.3963634068404171e-03  1.3205912964984576e-03  1.2472209005442345e-03  1.1762398473550908e-03
  1.1076345543964525e-03  1.0413902574371023e-03  9.7749103976445392e-04  9.1591986139982892e-04  8.5665858831372927e-04
  7.9968802164111295e-04  7.4498792689666892e-04  6.9253706319009184e-04  6.4231321244135556e-04  5.9429320859598952e-04
  5.4845296684035349e-04  5.0476751281691018e-04  4.6321101183950187e-04  4.2375679810862646e-04  3.8637740392670700e-04
  3.5104458891337294e-04  3.1772936922073091e-04  2.8640204674863865e-04  2.5703223835998401e-04  2.2958890509595584e-04
  2.0404038139131908e-04  1.8035440428969219e-04  1.5849814265881919e-04  1.3843822640584530e-04  1.2014077569259037e-04
  1.0357143015082794e-04  8.8695378097554747e-05  7.5477385750268109e-05  6.3881826442239303e-05  5.3872709837790925e-05
  4.5413711147569008e-05  3.8468200343819061e-05  3.2999271375658626e-05  2.8969771384357215e-05  2.6342329918604100e-05
  2.5079388149787385e-05  2.5143228087269598e-05  2.6496001793659824e-05  2.9099760600088866e-05  3.2916484321483547e-05
  3.7908110471845773e-05  4.4036563479519023e-05  5.1263783902473058e-05  5.9551757622581546e-05  6.8862543334098002e-05
  7.9158292040043735e-05  9.0401260934184664e-05  1.0255382678053651e-04  1.1557849929250568e-04  1.2943793451203011e-04
  1.4409494818872019e-04  1.5951252915899960e-04  1.7565385272524619e-04  1.9248229403493288e-04  2.0996144145976855e-04
  2.2805510997483884e-04  2.4672735453774722e-04  2.6594248346775544e-04  2.8566507182492502e-04  3.0585997478925763e-04
  3.2649234103983613e-04  3.4752762613396562e-04  3.6893160588631391e-04  3.9067038974805287e-04  4.1271043418599889e-04
  4.3501855606175411e-04  4.5756194601084707e-04  4.8030818182187346e-04  5.0322524181563755e-04  5.2628151822429255e-04
  5.4944583057048161e-04  5.7268743904647854e-04  5.9597605789332936e-04  6.1928186877999224e-04  6.4257553418247890e-04
  6.6582821076299585e-04  6.8901156274908432e-04  7.1209777531276188e-04  7.3505956794966292e-04  7.5787020785818011e-04
  7.8050352331860437e-04  8.0293391707226657e-04  8.2513637970067788e-04  8.4708650300467105e-04  8.6876049338354083e-04
  8.9013518521418547e-04  9.1118805423024687e-04  9.3189723090125211e-04  9.5224151381175372e-04  9.7220038304047097e-04
  9.9175401353943093e-04  1.0108832885131086e-03  1.0295698127975685e-03  1.0477959262396057e-03  1.0655447170758855e-03
  1.0828000353120858e-03  1.0995465061020364e-03  1.1157695431268625e-03  1.1314553619741212e-03  1.1465909935169478e-03
  1.1611642972931919e-03  1.1751639748799891e-03  1.1885795817145810e-03  1.2014015265747972e-03  1.2136210575493967e-03
  1.2252302458834771e-03  1.2362219698115566e-03  1.2465898983906527e-03  1.2563284753333652e-03  1.2654329028409549e-03
  1.2738991254364258e-03  1.2817238137976046e-03  1.2889043485902220e-03  1.2954388043009933e-03  1.3013259330706991e-03
  1.3065651485272658e-03  1.3111565096188464e-03  1.3151007044469015e-03  1.3183990340992794e-03  1.3210533964832971e-03
  1.3230662701588208e-03  1.3244406981713472e-03  1.3251802718850830e-03  1.3252891148160268e-03  1.3247718664650494e-03
  1.3236336661509741e-03  1.3218801368436572e-03  1.3195173689970700e-03  1.3165519043823778e-03  1.3129907199210223e-03
  1.3088412115178003e-03  1.3041111778939463e-03  1.2988088044202119e-03  1.2929426469499470e-03  1.2865216156521804e-03
  1.2795549588447007e-03  1.2720522468271365e-03  1.2640233557140372e-03  1.2554784512679544e-03  1.2464279727325215e-03
  1.2368826166655352e-03  1.2268533207720354e-03  1.2163512477373869e-03  1.2053877690603597e-03  1.1939744488862086e-03
  1.1821230278397557e-03  1.1698454068584697e-03  1.1571536310255477e-03  1.1440598734029942e-03  1.1305764188647041e-03
  1.1167156479295409e-03  1.1024900205944192e-03  1.0879120601673853e-03  1.0729943371006962e-03  1.0577494528239027e-03
  1.0421900235769276e-03  1.0263286642431487e-03  1.0101779721824779e-03  9.9375051106444234e-04  9.7705879470131002e-04
  9.6011527117147145e-04  9.4293231111868686e-04  9.2552220319255200e-04  9.0789715135520394e-04  8.9006927222293262e-04
  8.7205059240779152e-04  8.5385304585920913e-04  8.3548847120559929e-04  8.1696860909597261e-04  7.9830509954154744e-04
  7.7950947925736075e-04  7.6059317900387894e-04  7.4156752092860965e-04  7.2244371590771150e-04  7.0323286088760603e-04
  6.8394593622658870e-04  6.6459380303643921e-04  6.4518720052403290e-04  6.2573674333295205e-04  6.0625291888509621e-04
  5.8674608472229382e-04  5.6722646584791265e-04  5.4770415206847152e-04  5.2818909533525020e-04  5.0869110708590191e-04
  4.8921985558606244e-04  4.6978486327096307e-04  4.5039550408704026e-04  4.3106100083354693e-04  4.1179042250416391e-04
  3.9259268162861020e-04  3.7347653161425476e-04  3.5445056408772691e-04  3.3552320623652743e-04  3.1670271815063995e-04
  2.9799719016414131e-04  2.7941454019681303e-04  2.6096251109575231e-04  2.4264866797698258e-04  2.2448039556706499e-04
  2.0646489554470931e-04  1.8860918388238453e-04  1.7092008818793034e-04  1.5340424504616803e-04  1.3606809736051129e-04
  1.1891789169457719e-04  1.0195967561379732e-04  8.5199295027028844e-05  6.8642391528165626e-05  5.2294399737748583e-05
  3.6160544644577301e-05  2.0245838947320909e-05  4.5550803961288272e-06 -1.0907150865757708e-05 -2.6136494960395541e-05
 -4.1128814933527645e-05 -5.5880199412973019e-05 -7.0386965267014295e-05 -8.4645660214571693e-05 -9.8653064045669869e-05
 -1.1240618608259143e-04 -1.2590226106344392e-04 -1.3913874495867298e-04 -1.5211331078757533e-04 -1.6482384443481187e-04
 -1.7726844046692065e-04 -1.8944539794883008e-04 -2.0135321626037171e-04 -2.1299059091279350e-04 -2.2435640936527287e-04
 -2.3544974684142956e-04 -2.4626986214583885e-04 -2.5681619348054456e-04 -2.6708835426157197e-04 -2.7708612893544116e-04
 -2.8680946879567975e-04 -2.9625848779933617e-04 -3.0543345838349249e-04 -3.1433480728177766e-04 -3.2296311134088042e-04
 -3.3131909333706264e-04 -3.3940361779267179e-04 -3.4721768679265468e-04 -3.5476243580106982e-04 -3.6203912947760104e-04
 -3.6904915749407029e-04 -3.7579403035095064e-04 -3.8227537519387939e-04 -3.8849493163017120e-04 -3.9445454754533094e-04
 -4.0015617491956693e-04 -4.0560186564430375e-04 -4.1079376733869574e-04 -4.1573411916613959e-04 -4.2042524765078734e-04
 -4.2486956249406004e-04 -4.2906955239115996e-04 -4.3302778084758451e-04 -4.3674688199563843e-04 -4.4022955641094758e-04
 -4.4347856692897140e-04 -4.4649673446151656e-04 -4.4928693381324919e-04 -4.5185208949820863e-04 -4.5419517155632038e-04
 -4.5631919136990891e-04 -4.5822719748021075e-04 -4.5992227140388752e-04 -4.6140752344953930e-04 -4.6268608853421720e-04
 -4.6376112199993677e-04 -4.6463579543019082e-04 -4.6531329246646269e-04 -4.6579680462473911e-04 -4.6608952711202302e-04
 -4.6619465464284749e-04 -4.6611537726328763e-04 -4.6585487670124635e-04 -4.6541632501988326e-04 -4.6480288479332823e-04
 -4.6401770940783038e-04 -4.6306394336296543e-04 -4.6194472257284330e-04 -4.6066317466731549e-04 -4.5922241929318271e-04
 -4.5762556841540234e-04 -4.5587572661829581e-04 -4.5397599140675613e-04 -4.5192945350745555e-04 -4.4973919717005280e-04
 -4.4740830046840064e-04 -4.4493983560175352e-04 -4.4233686919597489e-04 -4.3960246260474475e-04 -4.3673967221076709e-04
 -4.3375154972697750e-04 -4.3064114249775052e-04 -4.2741149380010724e-04 -4.2406564314492268e-04 -4.2060662657813336e-04
 -4.1703747698194476e-04 -4.1336122437603891e-04 -4.0958089621878163e-04 -4.0569951770843030e-04 -4.0172011208434121e-04
 -3.9764570092817690e-04 -3.9347930446511411e-04 -3.8922394186505070e-04 -3.8488263154381352e-04 -3.8045839146436577e-04
 -3.7595423943801457e-04 -3.7137319342561833e-04 -3.6671827183879424e-04 -3.6199249384112592e-04 -3.5719887964937074e-04
 -3.5234045083466743e-04 -3.4742023062374344e-04 -3.4244124420012255e-04 -3.3740651900533226e-04 -3.3231908504011143e-04
 -3.2718197516561759e-04 -3.2199822540463445e-04 -3.1677087524277958e-04 -3.1150296792971166e-04 -3.0619755078033814e-04
 -3.0085767547602263e-04 -2.9548639836579247e-04 -2.9008678076754616e-04 -2.8466188926926062e-04 -2.7921479603019934e-04
 -2.7374857908211915e-04 -2.6826632263047818e-04 -2.6277111735564297e-04 -2.5726606071409632e-04 -2.5175425723894458e-04
 -2.4623881865425113e-04 -2.4072286261799387e-04 -2.3520951005161911e-04 -2.2970188226294997e-04 -2.2420309806812076e-04
 -2.1871627091351171e-04 -2.1324450599768334e-04 -2.0779089739331104e-04 -2.0235852516911965e-04 -1.9695045251181796e-04
 -1.9156972284803316e-04 -1.8621935696624557e-04 -1.8090235013872290e-04 -1.7562166924345508e-04 -1.7038024988608847e-04
 -1.6518099352186074e-04 -1.6002676457753512e-04 -1.5492038757333501e-04 -1.4986464424487862e-04 -1.4486227066511337e-04
 -1.3991595436625047e-04 -1.3502833146169946e-04 -1.3020198376800270e-04 -1.2543943592677000e-04 -1.2074315252661301e-04
 -1.1611553522507988e-04 -1.1155891987058971e-04 -1.0707557362436710e-04 -1.0266769208237670e-04 -9.8337396397257782e-05
 -9.4086730400258647e-05 -8.9917657723171215e-05 -8.5832058920265681e-05 -8.1831728590224837e-05 -7.7918372498078723e-05
 -7.4093604697139187e-05 -7.0358944650934319e-05 -6.6715814355143040e-05 -6.3165535459529644e-05 -5.9709326389878280e-05
 -5.6348299469927544e-05 -5.3083458043304965e-05 -4.9915693595461514e-05 -4.6845782875606305e-05 -4.3874385018640810e-05
 -4.1002038667093749e-05 -3.8229159093055274e-05 -3.5556035320111890e-05 -3.2982827245280527e-05 -3.0509562760943466e-05
 -2.8136134876782706e-05 -2.5862298841714481e-05 -2.3687669265823823e-05 -2.1611717242299129e-05 -1.9633767469366589e-05
 -1.7752995372224750e-05 -1.5968424224979249e-05 -1.4278922272650058e-05 -1.2683200114016057e-05 -1.1179811528123321e-05
 -9.7671598393901433e-06 -8.4435056366172899e-06 -7.2069745141777349e-06 -6.0555648132064188e-06 -4.9871553627899801e-06
 -3.9995132211565046e-06 -3.0903014168652720e-06 -2.2570866899964922e-06 -1.4973472333410533e-06 -8.0848043359027485e-07
 -1.8781061252563570e-07  3.6740323179147313e-07  8.5995968383000483e-07  1.2927071693995145e-06  1.6685362144604137e-06
  1.9903717039342282e-06  2.2611651405138490e-06  2.4838869034737935e-06  2.6615185074804669e-06  2.7970448614023962e-06
  2.8934465271205150e-06  2.9536919783384046e-06  2.9807298593925448e-06  2.9774812440625754e-06  2.9468318943815640e-06
  2.8916245194462331e-06  2.8146510342272593e-06  2.7186448183794761e-06  2.6062729750521762e-06  2.4801285896993320e-06
  2.3427229888898941e-06  2.1964779991179980e-06  2.0437182056132632e-06  1.8866632111510198e-06  1.7274198948625567e-06
  1.5679746710454164e-06  1.4101857479736463e-06  1.2557753867080020e-06  1.1063221599062426e-06  9.6325321063342569e-07
  8.2783651117208060e-07  7.0117312183251011e-07  5.8418944976305175e-07  4.7762950776031020e-07  3.8204717307945743e-07
  2.9779844624439400e-07  2.2503370985817625e-07  1.6368998741303022e-07  1.1348320210084827e-07  7.3900435623291136e-08
  4.4192187002101561e-08  2.3364631389346936e-08  1.0171878877697420e-08  3.1082333106210921e-09  4.0045109275696185e-10
  0.0000000000000000e+00
   78 195.09  0 dummy #Atomic_number  atomic_mass (g/cm^3) lattice_constant lattice_type
 -8.9463610299260221e-01 -9.2972854394605464e-01 -9.6468032834472706e-01 -9.9949146714810122e-01 -1.0341619785584102e+00
 -1.0686918879661507e+00 -1.1030812278955942e+00 -1.1373300379503000e+00 -1.1714383647586255e+00 -1.2054062619192396e+00
 -1.2392337899466335e+00 -1.2729210162166322e+00 -1.3064680149119081e+00 -1.3398748669674911e+00 -1.3731416600162809e+00
 -1.4062684883345593e+00 -1.4392554527875019e+00 -1.4721026607746892e+00 -1.5048102261756195e+00 -1.5373782692952203e+00
 -1.5698069168093598e+00 -1.6020963017103589e+00 -1.6342465632525034e+00 -1.6662578468975560e+00 -1.6981303042602671e+00
 -1.7298640930538878e+00 -1.7614593770356808e+00 -1.7929163259524330e+00 -1.8242351154859668e+00 -1.8554159271986523e+00
 -1.8864589484789192e+00 -1.9173643724867677e+00 -1.9481323980992817e+00 -1.9787632298561404e+00 -2.0092570779051284e+00
 -2.0396141579476508e+00 -2.0698346911842407e+00 -2.0999189042600763e+00 -2.1298670292104873e+00 -2.1596793034064712e+00
 -2.1893559695002018e+00 -2.2188972753705443e+00 -2.2483034740685639e+00 -2.2775748237630395e+00 -2.3067115876859754e+00
 -2.3357140340781131e+00 -2.3645824361344423e+00 -2.3933170719497134e+00 -2.4219182244639503e+00 -2.4503861814079597e+00
 -2.4787212352488464e+00 -2.5069236831355211e+00 -2.5349938268442163e+00 -2.5629319727239945e+00 -2.5907384316422633e+00
 -2.6184135189302848e+00 -2.6459575543286888e+00 -2.6733708619329830e+00 -2.7006537701390680e+00 -2.7278066115887460e+00
 -2.7548297231152330e+00 -2.7817234456886730e+00 -2.8084881243616477e+00 -2.8351241082146879e+00 -2.8616317503017883e+00
 -2.8880114075959158e+00 -2.9142634409345236e+00 -2.9403882149650626e+00 -2.9663860980904917e+00 -2.9922574624147931e+00
 -3.0180026836884797e+00 -3.0436221412541116e+00 -3.0691162179918026e+00 -3.0944853002647381e+00 -3.1197297778646820e+00
 -3.1448500439574913e+00 -3.1698464950286263e+00 -3.1947195308286629e+00 -3.2194695543188061e+00 -3.2440969716163992e+00
 -3.2686021919404373e+00 -3.2929856275570795e+00 -3.3172476937251578e+00 -3.3413888086416939e+00 -3.3654093933874067e+00
 -3.3893098718722254e+00 -3.4130906707808020e+00 -3.4367522195180240e+00 -3.4602949501545224e+00 -3.4837192973721884e+00
 -3.5070256984096826e+00 -3.5302145930079463e+00 -3.5532864233557158e+00 -3.5762416340350303e+00 -3.5990806719667483e+00
 -3.6218039863560572e+00 -3.6444120286379835e+00 -3.6669052524229087e+00 -3.6892841134420769e+00 -3.7115490694931093e+00
 -3.7337005803855154e+00 -3.7557391078862050e+00 -3.7776651156649987e+00 -3.7994790692401419e+00 -3.8211814359238145e+00
 -3.8427726847676453e+00 -3.8642532865082209e+00 -3.8856237135125995e+00 -3.9068844397238234e+00 -3.9280359406064265e+00
 -3.9490786930919524e+00 -3.9700131755244623e+00 -3.9908398676060468e+00 -4.0115592503423390e+00 -4.0321718059880274e+00
 -4.0526780179923634e+00 -4.0730783709446783e+00 -4.0933733505198928e+00 -4.1135634434240274e+00 -4.1336491373397175e+00
 -4.1536309208717226e+00 -4.1735092834924377e+00 -4.1932847154874100e+00 -4.2129577079008440e+00 -4.2325287524811177e+00
 -4.2519983416262939e+00 -4.2713669683296285e+00 -4.2906351261250908e+00 -4.3098033090328638e+00 -4.3288720115048669e+00
 -4.3478417283702600e+00 -4.3667129547809580e+00 -4.3854861861571450e+00 -4.4041619181327825e+00 -4.4227406465011239e+00
 -4.4412228671602225e+00 -4.4596090760584497e+00 -4.4778997691400013e+00 -4.4960954422904109e+00 -4.5141965912820634e+00
 -4.5322037117197027e+00 -4.5501172989859491e+00 -4.5679378481868076e+00 -4.5856658540971811e+00 -4.6033018111063804e+00
 -4.6208462131636363e+00 -4.6382995537236162e+00 -4.6556623256919298e+00 -4.6729350213706429e+00 -4.6901181324037884e+00
 -4.7072121497228832e+00 -4.7242175634924344e+00 -4.7411348630554517e+00 -4.7579645368789611e+00 -4.7747070724995186e+00
 -4.7913629564687161e+00 -4.8079326742986979e+00 -4.8244167104076743e+00 -4.8408155480654251e+00 -4.8571296693388204e+00
 -4.8733595550373288e+00 -4.8895056846585270e+00 -4.9055685363336181e+00 -4.9215485867729347e+00 -4.9374463112114597e+00
 -4.9532621833543296e+00 -4.9689966753223533e+00 -4.9846502575975196e+00 -5.0002233989685134e+00 -5.0157165664762218e+00
 -5.0311302253592487e+00 -5.0464648389994284e+00 -5.0617208688673365e+00 -5.0768987744677991e+00 -5.0919990132854078e+00
 -5.1070220407300297e+00 -5.1219683100823215e+00 -5.1368382724392383e+00 -5.1516323766595464e+00 -5.1663510693093375e+00
 -5.1809947946075372e+00 -5.1955639943714189e+00 -5.2100591079621150e+00 -5.2244805722301288e+00 -5.2388288214608467e+00
 -5.2531042873200491e+00 -5.2673073987994234e+00 -5.2814385821620737e+00 -5.2954982608880368e+00 -5.3094868556197898e+00
 -5.3234047841077627e+00 -5.3372524611558552e+00 -5.3510302985669389e+00 -5.3647387050883770e+00 -5.3783780863575359e+00
 -5.3919488448472928e+00 -5.4054513798115504e+00 -5.4188860872307476e+00 -5.4322533597573717e+00 -5.4455535866614726e+00
 -5.4587871537761679e+00 -5.4719544434437575e+00 -5.4850558344772784e+00 -5.4980917021612878e+00 -5.5110624182681072e+00
 -5.5239683510746520e+00 -5.5368098653792623e+00 -5.5495873225185415e+00 -5.5623010803841826e+00 -5.5749514934398059e+00
 -5.5875389127377906e+00 -5.6000636859361039e+00 -5.6125261573151404e+00 -5.6249266677945498e+00 -5.6372655549500701e+00
 -5.6495431530303630e+00 -5.6617597929738457e+00 -5.6739158024255225e+00 -5.6860115057538181e+00 -5.6980472240674107e+00
 -5.7100232752320652e+00 -5.7219399738874657e+00 -5.7337976314640482e+00 -5.7455965561998319e+00 -5.7573370531572561e+00
 -5.7690194242400077e+00 -5.7806439682098585e+00 -5.7922109807034943e+00 -5.8037207542493530e+00 -5.8151735782844494e+00
 -5.8265697391712168e+00 -5.8379095202143327e+00 -5.8491932016775561e+00 -5.8604210608005562e+00 -5.8715933718157522e+00
 -5.8827104059651365e+00 -5.8937724315171156e+00 -5.9047797137833404e+00 -5.9157325151355353e+00 -5.9266310950223371e+00
 -5.9374757099861242e+00 -5.9482666136798485e+00 -5.9590040568838720e+00 -5.9696882875227963e+00 -5.9803195506822959e+00
 -5.9908980886259533e+00 -6.0014241408120874e+00 -6.0118979439105917e+00 -6.0223197318197625e+00 -6.0326897356831344e+00
 -6.0430081839063128e+00 -6.0532753021738044e+00 -6.0634913134658532e+00 -6.0736564380752718e+00 -6.0837708936242736e+00
 -6.0938348950813070e+00 -6.1038486547778863e+00 -6.1138123824254276e+00 -6.1237262851320775e+00 -6.1335905674195494e+00
 -6.1434054312399553e+00 -6.1531710759926366e+00 -6.1628876985410006e+00 -6.1725554932293480e+00 -6.1821746518997145e+00
 -6.1917453639086917e+00 -6.2012678161442718e+00 -6.2107421930426705e+00 -6.2201686766051667e+00 -6.2295474464149327e+00
 -6.2388786796538653e+00 -6.2481625511194228e+00 -6.2573992332414541e+00 -6.2665888960990310e+00 -6.2757317074372860e+00
 -6.2848278326842406e+00 -6.2938774349676381e+00 -6.3028806751317799e+00 -6.3118377117543538e+00 -6.3207487011632697e+00
 -6.3296137974534945e+00 -6.3384331525038773e+00 -6.3472069159939917e+00 -6.3559352354209606e+00 -6.3646182561162945e+00
 -6.3732561212627203e+00 -6.3818489719110172e+00 -6.3903969469968489e+00 -6.3989001833575943e+00 -6.4073588157491823e+00
 -6.4157729768629244e+00 -6.4241427973423475e+00 -6.4324684058000239e+00 -6.4407499288344106e+00 -6.4489874910466742e+00
 -6.4571812150575294e+00 -6.4653312215240710e+00 -6.4734376291566038e+00 -6.4815005547354776e+00 -6.4895201131279210e+00
 -6.4974964173048706e+00 -6.5054295783578073e+00 -6.5133197055155900e+00 -6.5211669061612811e+00 -6.5289712858489892e+00
 -6.5367329483206964e+00 -6.5444519955230884e+00 -6.5521285276243955e+00 -6.5597626430312177e+00 -6.5673544384053608e+00
 -6.5749040086806705e+00 -6.5824114470798598e+00 -6.5898768451313510e+00 -6.5973002926860991e+00 -6.6046818779344285e+00
 -6.6120216874228692e+00 -6.6193198060709815e+00 -6.6265763171881984e+00 -6.6337913024906499e+00 -6.6409648421180014e+00
 -6.6480970146502836e+00 -6.6551878971247262e+00 -6.6622375650525933e+00 -6.6692460924360093e+00 -6.6762135517847998e+00
 -6.6831400141333175e+00 -6.6900255490572818e+00 -6.6968702246906044e+00 -6.7036741077422288e+00 -6.7104372635129579e+00
 -6.7171597559122889e+00 -6.7238416474752469e+00 -6.7304829993792161e+00 -6.7370838714607748e+00 -6.7436443222325249e+00
 -6.7501644088999271e+00 -6.7566441873781349e+00 -6.7630837123088225e+00 -6.7694830370770234e+00 -6.7758422138279606e+00
 -6.7821612934838766e+00 -6.7884403257608721e+00 -6.7946793591857331e+00 -6.8008784411127685e+00 -6.8070376177406402e+00
 -6.8131569341291938e+00 -6.8192364342162977e+00 -6.8252761608346697e+00 -6.8312761557287134e+00 -6.8372364595713488e+00
 -6.8431571119808483e+00 -6.8490381515376644e+00 -6.8548796158012664e+00 -6.8606815413269757e+00 -6.8664439636827890e+00
 -6.8721669174662221e+00 -6.8778504363211361e+00 -6.8834945529545717e+00 -6.8890992991535835e+00 -6.8946647058020698e+00
 -6.9001908028976100e+00 -6.9056776195682898e+00 -6.9111251840895438e+00 -6.9165335239009806e+00 -6.9219026656232190e+00
 -6.9272326350747182e+00 -6.9325234572886165e+00 -6.9377751565295558e+00 -6.9429877563105213e+00 -6.9481612794096712e+00
 -6.9532957478871689e+00 -6.9583911831020178e+00 -6.9634476057288932e+00 -6.9684650357749733e+00 -6.9734434925967772e+00
 -6.9783829949169922e+00 -6.9832835608413069e+00 -6.9881452078752506e+00 -6.9929679529410151e+00 -6.9977518123942986e+00
 -7.0024968020411311e+00 -7.0072029371547124e+00 -7.0118702324922371e+00 -7.0164987023117380e+00 -7.0210883603889087e+00
 -7.0256392200339448e+00 -7.0301512941083697e+00 -7.0346245950418744e+00 -7.0390591348491443e+00 -7.0434549251466931e+00
 -7.0478119771696983e+00 -7.0521303017888322e+00 -7.0564099095270958e+00 -7.0606508105766501e+00 -7.0648530148156485e+00
 -7.0690165318250715e+00 -7.0731413709055602e+00 -7.0772275410942438e+00 -7.0812750511815814e+00 -7.0852839097281839e+00
 -7.0892541250816565e+00 -7.0931857053932736e+00 -7.0970786586307026e+00 -7.1009329925806686e+00 -7.1047487148476698e+00
 -7.1085258328525338e+00 -7.1122643538309696e+00 -7.1159642848321321e+00 -7.1196256327171756e+00 -7.1232484041578106e+00
 -7.1268326056348643e+00 -7.1303782434368346e+00 -7.1338853236584505e+00 -7.1373538521992268e+00 -7.1407838347620229e+00
 -7.1441752768516009e+00 -7.1475281837731810e+00 -7.1508425606309993e+00 -7.1541184123268682e+00 -7.1573557435587292e+00
 -7.1605545588192125e+00 -7.1637148623941957e+00 -7.1668366583613592e+00 -7.1699199505887430e+00 -7.1729647427333063e+00
 -7.1759710382394850e+00 -7.1789388403377448e+00 -7.1818681520431449e+00 -7.1847589761538906e+00 -7.1876113152498915e+00
 -7.1904251716913210e+00 -7.1932005476171721e+00 -7.1959374449438149e+00 -7.1986358653635518e+00 -7.2012958103431819e+00
 -7.2039172811225480e+00 -7.2065002787131043e+00 -7.2090448038964663e+00 -7.2115508572229716e+00 -7.2140184390102364e+00
 -7.2164475493417148e+00 -7.2188381880652503e+00 -7.2211903547916432e+00 -7.2235040488931963e+00 -7.2257792695022820e+00
 -7.2280160155098931e+00 -7.2302142855642062e+00 -7.2323740780691326e+00 -7.2344953911828798e+00 -7.2365782228165072e+00
 -7.2386225706324865e+00 -7.2406284320432537e+00 -7.2425958042097713e+00 -7.2445246840400834e+00 -7.2464150681878738e+00
 -7.2482669530510222e+00 -7.2500803347701641e+00 -7.2518552092272452e+00 -7.2535915720440798e+00 -7.2552894185809107e+00
 -7.2569487439349620e+00 -7.2585695429390009e+00 -7.2601518101598908e+00 -7.2616955398971532e+00 -7.2632007261815215e+00
 -7.2646673627734994e+00 -7.2660954431619205e+00 -7.2674849605625012e+00 -7.2688359079164018e+00 -7.2701482778887829e+00
 -7.2714220628673623e+00 -7.2726572549609738e+00 -7.2738538459981203e+00 -7.2750118275255380e+00 -7.2761311908067485e+00
 -7.2772119268206161e+00 -7.2782540262599094e+00 -7.2792574795298552e+00 -7.2802222767466960e+00 -7.2811484077362492e+00
 -7.2820358620324637e+00 -7.2828846288759754e+00 -7.2836946972126668e+00 -7.2844660556922260e+00 -7.2851986926666985e+00
 -7.2858925961890488e+00 -7.2865477540117194e+00 -7.2871641535851825e+00 -7.2877417820565018e+00 -7.2882806262678885e+00
 -7.2887806727552604e+00 -7.2892419077467938e+00 -7.2896643171614892e+00 -7.2900478866077210e+00 -7.2903926013818001e+00
 -7.2906984464665276e+00 -7.2909654065297556e+00 -7.2911934659229409e+00 -7.2913826086797062e+00 -7.2915328185143951e+00
 -7.2916440788206289e+00 -7.2917163726698666e+00 -7.2917496828099591e+00 -7.2917439916637088e+00 -7.2916992813274275e+00
 -7.2916155335694910e+00 -7.2914927298288994e+00 -7.2913308512138331e+00 -7.2911298785002083e+00 -7.2908897921302396e+00
 -7.2906105722109906e+00 -7.2902921985129385e+00 -7.2899346504685250e+00 -7.2895379071707174e+00 -7.2891019473715648e+00
 -7.2886267494807564e+00 -7.2881122915641781e+00 -7.2875585513424692e+00 -7.2869655061895804e+00 -7.2863331331313326e+00
 -7.2856614088439722e+00 -7.2849503096527286e+00 -7.2841998115303745e+00 -7.2834098900957791e+00 -7.2825805206124663e+00
 -7.2817116779871771e+00 -7.2808033367684182e+00 -7.2798554711450292e+00 -7.2788680549447307e+00 -7.2778410616326887e+00
 -7.2767744643100682e+00 -7.2756682357125921e+00 -7.2745223482090973e+00 -7.2733367738000938e+00 -7.2721114841163210e+00
 -7.2708464504173040e+00 -7.2695416435899149e+00 -7.2681970341469260e+00 -7.2668125922255671e+00 -7.2653882875860862e+00
 -7.2639240896103052e+00 -7.2624199673001772e+00 -7.2608758892763436e+00 -7.2592918237766915e+00 -7.2576677386549120e+00
 -7.2560036013790556e+00 -7.2542993790300923e+00 -7.2525550383004660e+00 -7.2507705454926565e+00 -7.2489458665177304e+00
 -7.2470809668939040e+00 -7.2451758117450975e+00 -7.2432303657994934e+00 -7.2412445933880951e+00 -7.2392184584432826e+00
 -7.2371519244973692e+00 -7.2350449546811619e+00 -7.2328975117225154e+00 -7.2307095579448921e+00 -7.2284810552659176e+00
 -7.2262119651959393e+00 -7.2239022488365841e+00 -7.2215518668793131e+00 -7.2191607796039818e+00 -7.2167289468773967e+00
 -7.2142563281518743e+00 -7.2117428824637937e+00 -7.2091885684321575e+00 -7.2065933442571515e+00 -7.2039571677186958e+00
 -7.2012799961750069e+00 -7.1985617865611546e+00 -7.1958024953876185e+00 -7.1930020787388438e+00 -7.1901604922718025e+00
 -7.1872776912145468e+00 -7.1843536303647690e+00 -7.1813882640883593e+00 -7.1783815463179597e+00 -7.1753334305515253e+00
 -7.1722438698508801e+00 -7.1691128168402747e+00 -7.1659402237049417e+00 -7.1627260421896564e+00 -7.1594702235972916e+00
 -7.1561727187873752e+00 -7.1528334781746512e+00 -7.1494524517276306e+00 -7.1460295889671537e+00 -7.1425648389649474e+00
 -7.1390581503421791e+00 -7.1355094712680183e+00 -7.1319187494581895e+00 -7.1282859321735339e+00 -7.1246109662185653e+00
 -7.1208937979400240e+00 -7.1171343732254408e+00 -7.1133326375016894e+00 -7.1094885357335444e+00 -7.1056020124222403e+00
 -7.1016730116040279e+00 -7.0977014768488935e+00 -7.0936873512635117e+00 -7.0896305775049271e+00 -7.0855310977984720e+00
 -7.0813888539558443e+00 -7.0772037873931843e+00 -7.0729758391491551e+00 -7.0687049499030179e+00 -7.0643910599927118e+00
 -7.0600341094329320e+00 -7.0556340379332072e+00 -7.0511907849159750e+00 -7.0467042895346665e+00 -7.0421744906917780e+00
 -7.0376013270569509e+00 -7.0329847370850533e+00 -7.0283246590342516e+00 -7.0236210309840947e+00 -7.0188737908535872e+00
 -7.0140828764192698e+00 -7.0092482253332982e+00 -7.0043697751415195e+00 -6.9994474633015509e+00 -6.9944812272008559e+00
 -6.9894710041748276e+00 -6.9844167315248589e+00 -6.9793183465364272e+00 -6.9741757864971694e+00 -6.9689889887149619e+00
 -6.9637578905359954e+00 -6.9584824293628547e+00 -6.9531625426725983e+00 -6.9477981680348346e+00 -6.9423892431297993e+00
 -6.9369357057664356e+00 -6.9314374939004706e+00 -6.9258945456524943e+00 -6.9203067993260357e+00 -6.9146741934256442e+00
 -6.9089966666749643e+00 -6.9032741580348160e+00 -6.8975066067212714e+00 -6.8916939522237328e+00 -6.8858361343230126e+00
 -6.8799330931094085e+00 -6.8739847690007831e+00 -6.8679911027606426e+00 -6.8619520355162136e+00 -6.8558675087765213e+00
 -6.8497374644504676e+00 -6.8435618448649107e+00 -6.8373405927827395e+00 -6.8310736514209554e+00 -6.8247609644687488e+00
 -6.8184024761055770e+00 -6.8119981310192417e+00 -6.8055478744239695e+00 -6.7990516520784849e+00 -6.7925094103040955e+00
 -6.7859210960027641e+00 -6.7792866566751879e+00 -6.7726060404388795e+00 -6.7658791960462406e+00 -6.7591060729026449e+00
 -6.7522866210845107e+00 -6.7454207913573843e+00 -6.7385085351940139e+00 -6.7315498047924294e+00 -6.7245445530940211e+00
 -6.7174927338016150e+00 -6.7103943013975558e+00 -6.7032492111617783e+00 -6.6960574191898914e+00 -6.6888188824112538e+00
 -6.6815335586070503e+00 -6.6742014064283719e+00 -6.6668223854142958e+00 -6.6593964560099570e+00 -6.6519235795846345e+00
 -6.6444037184498228e+00 -6.6368368358773129e+00 -6.6292228961172688e+00 -6.6215618644163099e+00 -6.6138537070355810e+00
 -6.6060983912688389e+00 -6.5982958854605247e+00 -6.5904461590238430e+00 -6.5825491824588438e+00 -6.5746049273704941e+00
 -6.5666133664867594e+00 -6.5585744736766838e+00 -6.5504882239684630e+00 -6.5423545935675289e+00 -6.5341735598746187e+00
 -6.5259451015038623e+00 -6.5176691983008546e+00 -6.5093458313607355e+00 -6.5009749830462651e+00 -6.4925566370059080e+00
 -6.4840907781919048e+00 -6.4755773928783542e+00 -6.4670164686792866e+00 -6.4584079945667501e+00 -6.4497519608888805e+00
 -6.4410483593879810e+00 -6.4322971832186049e+00 -6.4234984269656294e+00 -6.4146520866623336e+00 -6.4057581598084781e+00
 -6.3968166453883830e+00 -6.3878275438890046e+00 -6.3787908573180152e+00 -6.3697065892218792e+00 -6.3605747447039329e+00
 -6.3513953304424620e+00 -6.3421683547087788e+00 -6.3328938273853002e+00 -6.3235717599836283e+00 -6.3142021656626248e+00
 -6.3047850592464911e+00 -6.2953204572428465e+00 -6.2858083778608052e+00 -6.2762488410290560e+00 -6.2666418684139380e+00
 -6.2569874834375190e+00 -6.2472857112956772e+00 -6.2375365789761741e+00 -6.2277401152767347e+00 -6.2178963508231275e+00
 -6.2080053180872392e+00 -6.1980670514051539e+00 -6.1880815869952341e+00 -6.1780489629761934e+00 -6.1679692193851769e+00
 -6.1578423981958421e+00 -6.1476685433364331e+00 -6.1374477007078596e+00 -6.1271799182017768e+00 -6.1168652457186585e+00
 -6.1065037351858829e+00 -6.0960954405758034e+00 -6.0856404179238304e+00 -6.0751387253465081e+00 -6.0645904230595944e+00
 -6.0539955733961355e+00 -6.0433542408245469e+00 -6.0326664919666895e+00 -6.0219323956159503e+00 -6.0111520227553168e+00
 -6.0003254465754576e+00 -5.9894527424928006e+00 -5.9785339881676087e+00 -5.9675692635220612e+00 -5.9565586507583275e+00
 -5.9455022343766490e+00 -5.9344001011934173e+00 -5.9232523403592463e+00 -5.9120590433770595e+00 -5.9008203041201606e+00
 -5.8895362188503135e+00 -5.8782068862358230e+00 -5.8668324073696079e+00 -5.8554128857872847e+00 -5.8439484274852420e+00
 -5.8324391409387175e+00 -5.8208851371198804e+00 -5.8092865295159060e+00 -5.7976434341470533e+00 -5.7859559695847471e+00
 -5.7742242569696511e+00 -5.7624484200297488e+00 -5.7506285850984211e+00 -5.7387648811325240e+00 -5.7268574397304661e+00
 -5.7149063951502894e+00 -5.7029118843277429e+00 -5.6908740468943630e+00 -5.6787930251955547e+00 -5.6666689643086618e+00
 -5.6545020120610525e+00 -5.6422923190481944e+00 -5.6300400386517317e+00 -5.6177453270575652e+00 -5.6054083432739281e+00
 -5.5930292491494660e+00 -5.5806082093913147e+00 -5.5681453915831760e+00 -5.5556409662033985e+00 -5.5430951066430554e+00
 -5.5305079892240210e+00 -5.5178797932170491e+00 -5.5052107008598519e+00 -5.4925008973751774e+00 -5.4797505709888874e+00
 -5.4669599129480346e+00 -5.4541291175389457e+00 -5.4412583821052909e+00 -5.4283479070661675e+00 -5.4153978959341798e+00
 -5.4024085553335119e+00 -5.3893800950175068e+00 -5.3763127278732181e+00 -5.3632066698928931e+00 -5.3500621401324313e+00
 -5.3368793606693368e+00 -5.3236585565606811e+00 -5.3103999558010555e+00 -5.2971037892805262e+00 -5.2837702907425950e+00
 -5.2703996967421531e+00 -5.2569922466034376e+00 -5.2435481823779888e+00 -5.2300677488026066e+00 -5.2165511932573061e+00
 -5.2029987657232741e+00 -5.1894107187408283e+00 -5.1757873073673686e+00 -5.1621287891353385e+00 -5.1484354240101791e+00
 -5.1347074743482848e+00 -5.1209452048549622e+00 -5.1071488825423863e+00 -5.0933187766875534e+00 -5.0794551587902417e+00
 -5.0655583025309658e+00 -5.0516284837289342e+00 -5.0376659803000043e+00 -5.0236710722146398e+00 -5.0096440414558669e+00
 -4.9955851719772308e+00 -4.9814947496607536e+00 -4.9673730622748877e+00 -4.9532203994324746e+00 -4.9390370525486995e+00
 -4.9248233147990526e+00 -4.9105794810772769e+00 -4.8963058479533332e+00 -4.8820027136313522e+00 -4.8676703779075909e+00
 -4.8533091421283920e+00 -4.8389193091481353e+00 -4.8245011832872002e+00 -4.8100550702899163e+00 -4.7955812772825261e+00
 -4.7810801127311340e+00 -4.7665518863996699e+00 -4.7519969093078416e+00 -4.7374154936890918e+00 -4.7228079529485560e+00
 -4.7081746016210158e+00 -4.6935157553288596e+00 -4.6788317307400362e+00 -4.6641228455260118e+00 -4.6493894183197275e+00
 -4.6346317686735539e+00 -4.6198502170172482e+00 -4.6050450846159130e+00 -4.5902166935279496e+00 -4.5753653665630143e+00
 -4.5604914272399792e+00 -4.5455951997448825e+00 -4.5306770088888904e+00 -4.5157371800662505e+00 -4.5007760392122487e+00
 -4.4857939127611663e+00 -4.4707911276042358e+00 -4.4557680110475992e+00 -4.4407248907702606e+00 -4.4256620947820480e+00
 -4.4105799513815622e+00 -4.3954787891141436e+00 -4.3803589367298175e+00 -4.3652207231412596e+00 -4.3500644773817481e+00
 -4.3348905285631201e+00 -4.3196992058337278e+00 -4.3044908383363989e+00 -4.2892657551663875e+00 -4.2740242853293351e+00
 -4.2587667576992239e+00 -4.2434935009763350e+00 -4.2282048436452042e+00 -4.2129011139325794e+00 -4.1975826397653737e+00
 -4.1822497487286281e+00 -4.1669027680234620e+00 -4.1515420244250327e+00 -4.1361678442404912e+00 -4.1207805532669379e+00
 -4.1053804767493798e+00 -4.0899679393386865e+00 -4.0745432650495506e+00 -4.0591067772184353e+00 -4.0436587984615402e+00
 -4.0281996506327502e+00 -4.0127296547815998e+00 -3.9972491311112224e+00 -3.9817583989363086e+00 -3.9662577766410667e+00
 -3.9507475816371738e+00 -3.9352281303217351e+00 -3.9196997380352414e+00 -3.9041627190195216e+00 -3.8886173863757025e+00
 -3.8730640520221651e+00 -3.8575030266524992e+00 -3.8419346196934612e+00 -3.8263591392629306e+00 -3.8107768921278655e+00
 -3.7951881836622610e+00 -3.7795933178051024e+00 -3.7639925970183250e+00 -3.7483863222447691e+00 -3.7327747928661359e+00
 -3.7171583066609450e+00 -3.7015371597624900e+00 -3.6859116466167965e+00 -3.6702820599405763e+00 -3.6546486906791849e+00
 -3.6390118279645796e+00 -3.6233717590732724e+00 -3.6077287693842903e+00 -3.5920831423371284e+00 -3.5764351593897086e+00
 -3.5607850999763366e+00 -3.5451332414656545e+00 -3.5294798591186014e+00 -3.5138252260463689e+00 -3.4981696131683564e+00
 -3.4825132891701269e+00 -3.4668565204613673e+00 -3.4511995711338397e+00 -3.4355427029193413e+00 -3.4198861751476608e+00
 -3.4042302447045336e+00 -3.3885751659895980e+00 -3.3729211908743535e+00 -3.3572685686601149e+00 -3.3416175460359705e+00
 -3.3259683670367384e+00 -3.3103212730009219e+00 -3.2946765025286675e+00 -3.2790342914397197e+00 -3.2633948727313782e+00
 -3.2477584765364549e+00 -3.2321253300812303e+00 -3.2164956576434087e+00 -3.2008696805100749e+00 -3.1852476169356532e+00
 -3.1696296820998597e+00 -3.1540160880656631e+00 -3.1384070437372373e+00 -3.1228027548179202e+00 -3.1072034237681700e+00
 -3.0916092497635201e+00 -3.0760204286525381e+00 -3.0604371529147794e+00 -3.0448596116187456e+00 -3.0292879903798409e+00
 -3.0137224713183270e+00 -2.9981632330172823e+00 -2.9826104504805548e+00 -2.9670642950907218e+00 -2.9515249345670447e+00
 -2.9359925329234251e+00 -2.9204672504263622e+00 -2.9049492435529105e+00 -2.8894386649486319e+00 -2.8739356633855575e+00
 -2.8584403837201409e+00 -2.8429529668512141e+00 -2.8274735496779466e+00 -2.8120022650578003e+00 -2.7965392417644854e+00
 -2.7810846044459177e+00 -2.7656384735821748e+00 -2.7502009654434536e+00 -2.7347721920480246e+00 -2.7193522611201910e+00
 -2.7039412760482420e+00 -2.6885393358424117e+00 -2.6731465350928358e+00 -2.6577629639275058e+00 -2.6423887079702273e+00
 -2.6270238482985762e+00 -2.6116684614018539e+00 -2.5963226191390465e+00 -2.5809863886967772e+00 -2.5656598325472673e+00
 -2.5503430084062884e+00 -2.5350359691911231e+00 -2.5197387629785166e+00 -2.5044514329626377e+00 -2.4891740174130335e+00
 -2.4739065496325838e+00 -2.4586490579154612e+00 -2.4434015655050856e+00 -2.4281640905520803e+00 -2.4129366460722288e+00
 -2.3977192399044345e+00
  1.0000000000000000e+00  1.0000004121435471e+00  9.9999999119301186e-01  9.9999869343527148e-01  9.9999640521669497e-01
  9.9999291001907153e-01  9.9998788321315113e-01  9.9998093211351957e-01  9.9997164730785337e-01  9.9995965003025555e-01
  9.9994460764019921e-01  9.9992621507578094e-01  9.9990417116623920e-01  9.9987815863158991e-01  9.9984784131681603e-01
  9.9981287342844860e-01  9.9977290974768285e-01  9.9972761307203672e-01  9.9967665358867874e-01  9.9961970460978378e-01
  9.9955643824702267e-01  9.9948652291171014e-01  9.9940962422448421e-01  9.9932540690395188e-01  9.9923353655861047e-01
  9.9913368040367945e-01  9.9902550667240442e-01  9.9890868379613040e-01  9.9878287968844748e-01  9.9864776159954405e-01
  9.9850299642284679e-01  9.9834825104722680e-01  9.9818319262741584e-01  9.9800748858070476e-01  9.9782080644258853e-01
  9.9762281371704775e-01  9.9741317778265626e-01  9.9719156591780345e-01  9.9695764536523890e-01  9.9671108339458447e-01
  9.9645154733086416e-01  9.9617870453604385e-01  9.9589222238088115e-01  9.9559176821963036e-01  9.9527700938334007e-01
  9.9494761318993952e-01  9.9460324695636493e-01  9.9424357800830265e-01  9.9386827368073583e-01  9.9347700131308092e-01
  9.9306942824401379e-01  9.9264522180798631e-01  9.9220404933586470e-01  9.9174557815713082e-01  9.9126947560205625e-01
  9.9077540900281325e-01  9.9026304569291013e-01  9.8973205300622613e-01  9.8918209827612225e-01  9.8861284883515121e-01
  9.8802397201538550e-01  9.8741513514883295e-01  9.8678600556778528e-01  9.8613625060486132e-01  9.8546553759284639e-01
  9.8477353386451560e-01  9.8405990675250687e-01  9.8332432358933108e-01  9.8256645170744183e-01  9.8178595843930661e-01
  9.8098251111744861e-01  9.8015577707444035e-01  9.7930542364288131e-01  9.7843111815537742e-01  9.7753252794452272e-01
  9.7660932034288639e-01  9.7566116268299929e-01  9.7468772229734857e-01  9.7368866651840502e-01  9.7266366267867843e-01
  9.7161237811077306e-01  9.7053448014741028e-01  9.6942963612134114e-01  9.6829751336520520e-01  9.6713777921139321e-01
  9.6595010099203760e-01  9.6473414603926733e-01  9.6348958168554533e-01  9.6221607526396780e-01  9.6091329410814341e-01
  9.5958090555151254e-01  9.5821857692655765e-01  9.5682597556421822e-01  9.5540276879453367e-01  9.5394862394835844e-01
  9.5246320835918430e-01  9.5094618936408315e-01  9.4939723430139622e-01  9.4781601050658104e-01  9.4620218530807954e-01
  9.4455542602651132e-01  9.4287539998166670e-01  9.4116177450234051e-01  9.3941421693534521e-01  9.3763239464334747e-01
  9.3581597498574898e-01  9.3396462529570001e-01  9.3207801286186953e-01  9.3015580494394767e-01  9.2819766882154209e-01
  9.2620327184739815e-01  9.2417228147907660e-01  9.2210436521867678e-01  9.1999919049317935e-01  9.1785642453300931e-01
  9.1567573433507543e-01  9.1345678685294618e-01  9.1119924928177021e-01  9.0890278932708934e-01  9.0656707517968393e-01
  9.0419177498177827e-01  9.0177655615891761e-01  8.9932108486051920e-01  8.9682502631669248e-01  8.9428804622746383e-01
  8.9170981231436375e-01  8.8908999535156608e-01  8.8642826762196325e-01  8.8372429947849507e-01  8.8097775578408577e-01
  8.7818829447546498e-01  8.7535557168027611e-01  8.7247924996096604e-01  8.6955900628811167e-01  8.6659453235936745e-01
  8.6358551979910536e-01  8.6053164075479072e-01  8.5743253091171356e-01  8.5428779715983516e-01  8.5109705688296355e-01
  8.4785998314673827e-01  8.4457633749032501e-01  8.4124593126383951e-01  8.3786852709773196e-01  8.3444373475833333e-01
  8.3097095979913771e-01  8.2744953957941270e-01  8.2387898139710358e-01  8.2025919792804292e-01  8.1659054541694476e-01
  8.1287341650154021e-01  8.0910767721541443e-01  8.0529215580465419e-01  8.0142478838381437e-01  7.9750372432292727e-01
  7.9352864110341126e-01  7.8950176862897392e-01  7.8542694901419641e-01  7.8130682286070730e-01  7.7713978783483706e-01
  7.7291825409185699e-01  7.6863220845763780e-01  7.6427607937037978e-01  7.5985566394460180e-01  7.5539002566569768e-01
  7.5090039148126919e-01  7.4639383415907112e-01  7.4184799801975421e-01  7.3721315190998049e-01  7.3244310395281431e-01
  7.2753342582290337e-01  7.2255299996340761e-01  7.1762208857945453e-01  7.1283235786992893e-01  7.0815824409924277e-01
  7.0339959470529889e-01  6.9827252368723258e-01  6.9260529612178923e-01  6.8654015967665294e-01  6.8061547669005640e-01
  6.7549299205922220e-01  6.7152220666515805e-01  6.6830860229383893e-01  6.6447940257238292e-01  6.5782482486123861e-01
  6.5279865475804411e-01  6.5680192849583763e-01  6.6032434465789935e-01  6.6336732070089910e-01  6.6593299586560228e-01
  6.6802420913022276e-01  6.6964447716377717e-01  6.7079797227943827e-01  6.7148950038788802e-01  6.7172447895067144e-01
  6.7150891493355047e-01  6.7084938275985673e-01  6.6975300226384593e-01  6.6822741664405061e-01  6.6628077041663403e-01
  6.6392168736874402e-01  6.6115924851186569e-01  6.5800297003517583e-01  6.5446278125889601e-01  6.5054900258764592e-01
  6.4627232346379737e-01  6.4164378032082769e-01  6.3667473453667278e-01  6.3137685038708136e-01  6.2576207299896813e-01
  6.1984260630376720e-01  6.1363089099078583e-01  6.0713958246055799e-01  6.0038152877819762e-01  5.9336974862675240e-01
  5.8611740926055733e-01  5.7863780445858803e-01  5.7094433247781429e-01  5.6305047400655395e-01  5.5496977011782600e-01
  5.4671580022270438e-01  5.3830216002367126e-01  5.2974243946797106e-01  5.2105020070096342e-01  5.1223895601947678e-01
  5.0332214582516255e-01  4.9431311657784788e-01  4.8522509874888958e-01  4.7607118477452759e-01  4.6686430700923853e-01
  4.5761721567908908e-01  4.4834245683508961e-01  4.3905235030654799e-01  4.2975896765442245e-01  4.2047411012467578e-01
  4.1120928660162881e-01  4.0197569156131324e-01  3.9278418302482604e-01  3.8364526051168235e-01  3.7456904299316945e-01
  3.6556524684569991e-01  3.5664316380416583e-01  3.4781163891529093e-01  3.3907904849100240e-01  3.3045327859831386e-01
  3.2194171276540046e-01  3.1355123751934383e-01  3.0528825324017361e-01  2.9715868514225008e-01  2.8916799425564682e-01
  2.8132118840753301e-01  2.7362283320355629e-01  2.6607706300922507e-01  2.5868759193129115e-01  2.5145772479913242e-01
  2.4439036814613518e-01  2.3748804119107675e-01  2.3075288681950817e-01  2.2418668256513657e-01  2.1779085159120781e-01
  2.1156647367188902e-01  2.0551429617365116e-01  1.9963474503665155e-01  1.9392793575611639e-01  1.8839368436372339e-01
  1.8303151840898427e-01  1.7784068794062730e-01  1.7282017648797990e-01  1.6796871204235114e-01  1.6328477803841429e-01
  1.5876662433558944e-01  1.5441227819942605e-01  1.5021955528298533e-01  1.4618607060822289e-01  1.4230924954737154e-01
  1.3858633880432339e-01  1.3501441739601269e-01  1.3159040763379842e-01  1.2831108610484659e-01  1.2517309465351309e-01
  1.2217295136272593e-01  1.1930706153536805e-01  1.1657172867565974e-01  1.1396316547054125e-01  1.1147750477105531e-01
  1.0911081057372965e-01  1.0685908900195959e-01  1.0471829928739068e-01  1.0268436475130102e-01  1.0075318378598400e-01
  9.8920640836130808e-02  9.7182617380212999e-02  9.5535002911864980e-02  9.3973705921266582e-02  9.2494664876525662e-02
  9.1093859205060634e-02  8.9767320274982909e-02  8.8511142376479723e-02  8.7321493703196307e-02  8.6194627333618712e-02
  8.5126892212456506e-02  8.4114744132024577e-02  8.3154756647605951e-02  8.2243629629362255e-02  8.1378190544788925e-02
  8.0555392282958382e-02  7.9772310800691040e-02  7.9026142768725244e-02  7.8314203217887235e-02  7.7633923185261175e-02
  7.6982847360358986e-02  7.6358631731290372e-02  7.5759041230932758e-02  7.5181947383101272e-02  7.4625325948718652e-02
  7.4087254571985228e-02  7.3565910426548919e-02  7.3059567861675098e-02  7.2566596048416601e-02  7.2085456625783709e-02
  7.1614701346914042e-02  7.1152969725242543e-02  7.0698986680671455e-02  7.0251560185740233e-02  6.9809578911795539e-02
  6.9372009875161150e-02  6.8937896083307984e-02  6.8506354181023993e-02  6.8076572096584118e-02  6.7647806687920295e-02
  6.7219381388791369e-02  6.6790683854953070e-02  6.6361163610327956e-02  6.5930329693175360e-02  6.5497748302261349e-02
  6.5063040443028727e-02  6.4625879573766920e-02  6.4185989251781955e-02  6.3743140779566443e-02  6.3297150850969514e-02
  6.2847879197366729e-02  6.2395226233830148e-02  6.1939130705298155e-02  6.1479567332745490e-02  6.1016544459353200e-02
  6.0550101696678571e-02  6.0080307570825102e-02  5.9607257168612440e-02  5.9131069783746354e-02  5.8651886562988691e-02
  5.8169868152327303e-02  5.7685192343146049e-02  5.7198051718394705e-02  5.6708651298758968e-02  5.6217206188830304e-02
  5.5723939223276120e-02  5.5229078613009415e-02  5.4732855591359042e-02  5.4235502060239416e-02  5.3737248236320680e-02
  5.3238320299746678e-02  5.2738938284821707e-02  5.2239315185321780e-02  5.1739656966549898e-02  5.1240162665397493e-02
  5.0741024490499789e-02  5.0242427922391121e-02  4.9744551813660220e-02  4.9247568489105567e-02  4.8751643845890695e-02
  4.8256937453699515e-02  4.7763602654891650e-02  4.7271786664657721e-02  4.6781630671174704e-02  4.6293269935761217e-02
  4.5806833893032861e-02  4.5322446251057559e-02  4.4840225091510817e-02  4.4360282969831098e-02  4.3882727015375128e-02
  4.3407659031573197e-02  4.2935175596084500e-02  4.2465368160952456e-02  4.1998323152760024e-02  4.1534122072785007e-02
  4.1072841597155400e-02  4.0614553677004693e-02  4.0159325638627189e-02  3.9707220283633354e-02  3.9258295989105081e-02
  3.8812606807751060e-02  3.8370202568062076e-02  3.7931128974466342e-02  3.7495427707484791e-02  3.7063136523886431e-02
  3.6634289356843652e-02  3.6208916416087533e-02  3.5787044288063168e-02  3.5368696036085015e-02  3.4953891300492160e-02
  3.4542646398803695e-02  3.4134974425873987e-02  3.3730885354048057e-02  3.3330386133316833e-02  3.2933480791472527e-02
  3.2540170534263904e-02  3.2150453845551666e-02  3.1764326587463691e-02  3.1381782100550433e-02  3.1002811303940191e-02
  3.0627402795494453e-02  3.0255542951963189e-02  2.9887216029140209e-02  2.9522404262018458e-02  2.9161087964945334e-02
  2.8803245631778027e-02  2.8448854036038820e-02  2.8097888331070412e-02  2.7750322150186916e-02  2.7406127704895533e-02
  2.7065275866576421e-02  2.6727736228924590e-02  2.6393477167140019e-02  2.6062465897094923e-02  2.5734668534500994e-02
  2.5410050154076661e-02  2.5088574848714310e-02  2.4770205788647574e-02  2.4454905280618541e-02  2.4142634827045036e-02
  2.3833355185187852e-02  2.3527026426318001e-02  2.3223607994883967e-02  2.2923058767678951e-02  2.2625337113008123e-02
  2.2330400949855871e-02  2.2038207807053050e-02  2.1748714882444224e-02  2.1461879102054923e-02  2.1177657179258891e-02
  2.0896005673945332e-02  2.0616881051686162e-02  2.0340239742903256e-02  2.0066038202035688e-02  1.9794232966707008e-02
  1.9524780716892454e-02  1.9257638334086221e-02  1.8992762960468722e-02  1.8730112058073803e-02  1.8469643467956029e-02
  1.8211315469357905e-02  1.7955086838877136e-02  1.7700916909633879e-02  1.7448765630437992e-02  1.7198593624956262e-02
  1.6950362250879696e-02  1.6704033659090720e-02  1.6459570852830469e-02  1.6216937746866014e-02  1.5976099226657624e-02
  1.5737021207526000e-02  1.5499670693819528e-02  1.5264015838081540e-02  1.5030026000217550e-02  1.4797671806662508e-02
  1.4566925209548049e-02  1.4337759545869740e-02  1.4110149596654336e-02  1.3884071646127009e-02  1.3659503540878625e-02
  1.3436424749032968e-02  1.3214816419414011e-02  1.2994661440713146e-02  1.2775944500656439e-02  1.2558652145171887e-02
  1.2342772837556651e-02  1.2128297017644151e-02  1.1915217158673323e-02  1.1703527788069502e-02  1.1493225442589038e-02
  1.1284308605137572e-02  1.1076777641199376e-02  1.0870634735266685e-02  1.0665883827269029e-02  1.0462530549002569e-02
  1.0260582160559431e-02  1.0060047486757038e-02  9.8609368535674466e-03  9.6632620245466778e-03  9.4670361372640507e-03
  9.2722736397315222e-03  9.0789902268330128e-03  8.8872027767537467e-03  8.6969292874095796e-03  8.5081888128763390e-03
  8.3210013998191550e-03  8.1353880239217954e-03  7.9513705263159935e-03  7.7689715500107899e-03  7.5882144763218659e-03
  7.4091233613008713e-03  7.2317228721647617e-03  7.0560382237251336e-03  6.8820951148175569e-03  6.7099196647309092e-03
  6.5395383496367077e-03  6.3709779390184445e-03  6.2042654321009241e-03  6.0394279942795892e-03  5.8764928935498614e-03
  5.7154874369364731e-03  5.5564389069227976e-03  5.3993744978801921e-03  5.2443212524973214e-03  5.0913059982094968e-03
  4.9403552836280087e-03  4.7914953149694635e-03  4.6447518924851118e-03  4.5001503468901881e-03  4.3577154757932389e-03
  4.2174714801254641e-03  4.0794419005700400e-03  3.9436495539914660e-03  3.8101164698648854e-03  3.6788638267054325e-03
  3.5499118884975544e-03  3.4232799411243534e-03  3.2989862287969140e-03  3.1770478904836457e-03  3.0574808963396045e-03
  2.9402999841358409e-03  2.8255185956887214e-03  2.7131488132892696e-03  2.6032012961324982e-03  2.4956852167467396e-03
  2.3906081979727669e-03  2.2879762675688301e-03  2.1877938636467122e-03  2.0900638628229841e-03  1.9947876094342761e-03
  1.9019649447525534e-03  1.8115942362003910e-03  1.7236724065662493e-03  1.6381949632197465e-03  1.5551560273269352e-03
  1.4745483630655772e-03  1.3963634068404171e-03  1.3205912964984576e-03  1.2472209005442345e-03  1.1762398473550908e-03
  1.1076345543964525e-03  1.0413902574371023e-03  9.7749103976445392e-04  9.1591986139982892e-04  8.5665858831372927e-04
  7.9968802164111295e-04  7.4498792689666892e-04  6.9253706319009184e-04  6.4231321244135556e-04  5.9429320859598952e-04
  5.4845296684035349e-04  5.0476751281691018e-04  4.6321101183950187e-04  4.2375679810862646e-04  3.8637740392670700e-04
  3.5104458891337294e-04  3.1772936922073091e-04  2.8640204674863865e-04  2.5703223835998401e-04  2.2958890509595584e-04
  2.0404038139131908e-04  1.8035440428969219e-04  1.5849814265881919e-04  1.3843822640584530e-04  1.2014077569259037e-04
  1.0357143015082794e-04  8.8695378097554747e-05  7.5477385750268109e-05  6.3881826442239303e-05  5.3872709837790925e-05
  4.5413711147569008e-05  3.8468200343819061e-05  3.2999271375658626e-05  2.8969771384357215e-05  2.6342329918604100e-05
  2.5079388149787385e-05  2.5143228087269598e-05  2.6496001793659824e-05  2.9099760600088866e-05  3.2916484321483547e-05
  3.7908110471845773e-05  4.4036563479519023e-05  5.1263783902473058e-05  5.9551757622581546e-05  6.8862543334098002e-05
  7.9158292040043735e-05  9.0401260934184664e-05  1.0255382678053651e-04  1.1557849929250568e-04  1.2943793451203011e-04
  1.4409494818872019e-04  1.5951252915899960e-04  1.7565385272524619e-04  1.9248229403493288e-04  2.0996144145976855e-04
  2.2805510997483884e-04  2.4672735453774722e-04  2.6594248346775544e-04  2.8566507182492502e-04  3.0585997478925763e-04
  3.2649234103983613e-04  3.4752762613396562e-04  3.6893160588631391e-04  3.9067038974805287e-04  4.1271043418599889e-04
  4.3501855606175411e-04  4.5756194601084707e-04  4.8030818182187346e-04  5.0322524181563755e-04  5.2628151822429255e-04
  5.4944583057048161e-04  5.7268743904647854e-04  5.9597605789332936e-04  6.1928186877999224e-04  6.4257553418247890e-04
  6.6582821076299585e-04  6.8901156274908432e-04  7.1209777531276188e-04  7.3505956794966292e-04  7.5787020785818011e-04
  7.8050352331860437e-04  8.0293391707226657e-04  8.2513637970067788e-04  8.4708650300467105e-04  8.6876049338354083e-04
  8.9013518521418547e-04  9.1118805423024687e-04  9.3189723090125211e-04  9.5224151381175372e-04  9.7220038304047097e-04
  9.9175401353943093e-04  1.0108832885131086e-03  1.0295698127975685e-03  1.0477959262396057e-03  1.0655447170758855e-03
  1.0828000353120858e-03  1.0995465061020364e-03  1.1157695431268625e-03  1.1314553619741212e-03  1.1465909935169478e-03
  1.1611642972931919e-03  1.1751639748799891e-03  1.1885795817145810e-03  1.2014015265747972e-03  1.2136210575493967e-03
  1.2252302458834771e-03  1.2362219698115566e-03  1.2465898983906527e-03  1.2563284753333652e-03  1.2654329028409549e-03
  1.2738991254364258e-03  1.2817238137976046e-03  1.2889043485902220e-03  1.2954388043009933e-03  1.3013259330706991e-03
  1.3065651485272658e-03  1.3111565096188464e-03  1.3151007044469015e-03  1.3183990340992794e-03  1.3210533964832971e-03
  1.3230662701588208e-03  1.3244406981713472e-03  1.3251802718850830e-03  1.3252891148160268e-03  1.3247718664650494e-03
  1.3236336661509741e-03  1.3218801368436572e-03  1.3195173689970700e-03  1.3165519043823778e-03  1.3129907199210223e-03
  1.3088412115178003e-03  1.3041111778939463e-03  1.2988088044202119e-03  1.2929426469499470e-03  1.2865216156521804e-03
  1.2795549588447007e-03  1.2720522468271365e-03  1.2640233557140372e-03  1.2554784512679544e-03  1.2464279727325215e-03
  1.2368826166655352e-03  1.2268533207720354e-03  1.2163512477373869e-03  1.2053877690603597e-03  1.1939744488862086e-03
  1.1821230278397557e-03  1.1698454068584697e-03  1.1571536310255477e-03  1.1440598734029942e-03  1.1305764188647041e-03
  1.1167156479295409e-03  1.1024900205944192e-03  1.0879120601673853e-03  1.0729943371006962e-03  1.0577494528239027e-03
  1.0421900235769276e-03  1.0263286642431487e-03  1.0101779721824779e-03  9.9375051106444234e-04  9.7705879470131002e-04
  9.6011527117147145e-04  9.4293231111868686e-04  9.2552220319255200e-04  9.0789715135520394e-04  8.9006927222293262e-04
  8.7205059240779152e-04  8.5385304585920913e-04  8.3548847120559929e-04  8.1696860909597261e-04  7.9830509954154744e-04
  7.7950947925736075e-04  7.6059317900387894e-04  7.4156752092860965e-04  7.2244371590771150e-04  7.0323286088760603e-04
  6.8394593622658870e-04  6.6459380303643921e-04  6.4518720052403290e-04  6.2573674333295205e-04  6.0625291888509621e-04
  5.8674608472229382e-04  5.6722646584791265e-04  5.4770415206847152e-04  5.2818909533525020e-04  5.0869110708590191e-04
  4.8921985558606244e-04  4.6978486327096307e-04  4.5039550408704026e-04  4.3106100083354693e-04  4.1179042250416391e-04
  3.9259268162861020e-04  3.7347653161425476e-04  3.5445056408772691e-04  3.3552320623652743e-04  3.1670271815063995e-04
  2.9799719016414131e-04  2.7941454019681303e-04  2.6096251109575231e-04  2.4264866797698258e-04  2.2448039556706499e-04
  2.0646489554470931e-04  1.8860918388238453e-04  1.7092008818793034e-04  1.5340424504616803e-04  1.3606809736051129e-04
  1.1891789169457719e-04  1.0195967561379732e-04  8.5199295027028844e-05  6.8642391528165626e-05  5.2294399737748583e-05
  3.6160544644577301e-05  2.0245838947320909e-05  4.5550803961288272e-06 -1.0907150865757708e-05 -2.6136494960395541e-05
 -4.1128814933527645e-05 -5.5880199412973019e-05 -7.0386965267014295e-05 -8.4645660214571693e-05 -9.8653064045669869e-05
 -1.1240618608259143e-04 -1.2590226106344392e-04 -1.3913874495867298e-04 -1.5211331078757533e-04 -1.6482384443481187e-04
 -1.7726844046692065e-04 -1.8944539794883008e-04 -2.0135321626037171e-04 -2.1299059091279350e-04 -2.2435640936527287e-04
 -2.3544974684142956e-04 -2.4626986214583885e-04 -2.5681619348054456e-04 -2.6708835426157197e-04 -2.7708612893544116e-04
 -2.8680946879567975e-04 -2.9625848779933617e-04 -3.0543345838349249e-04 -3.1433480728177766e-04 -3.2296311134088042e-04
 -3.3131909333706264e-04 -3.3940361779267179e-04 -3.4721768679265468e-04 -3.5476243580106982e-04 -3.6203912947760104e-04
 -3.6904915749407029e-04 -3.7579403035095064e-04 -3.8227537519387939e-04 -3.8849493163017120e-04 -3.9445454754533094e-04
 -4.0015617491956693e-04 -4.0560186564430375e-04 -4.1079376733869574e-04 -4.1573411916613959e-04 -4.2042524765078734e-04
 -4.2486956249406004e-04 -4.2906955239115996e-04 -4.3302778084758451e-04 -4.3674688199563843e-04 -4.4022955641094758e-04
 -4.4347856692897140e-04 -4.4649673446151656e-04 -4.4928693381324919e-04 -4.5185208949820863e-04 -4.5419517155632038e-04
 -4.5631919136990891e-04 -4.5822719748021075e-04 -4.5992227140388752e-04 -4.6140752344953930e-04 -4.6268608853421720e-04
 -4.6376112199993677e-04 -4.6463579543019082e-04 -4.6531329246646269e-04 -4.6579680462473911e-04 -4.6608952711202302e-04
 -4.6619465464284749e-04 -4.6611537726328763e-04 -4.6585487670124635e-04 -4.6541632501988326e-04 -4.6480288479332823e-04
 -4.6401770940783038e-04 -4.6306394336296543e-04 -4.6194472257284330e-04 -4.6066317466731549e-04 -4.5922241929318271e-04
 -4.5762556841540234e-04 -4.5587572661829581e-04 -4.5397599140675613e-04 -4.5192945350745555e-04 -4.4973919717005280e-04
 -4.4740830046840064e-04 -4.4493983560175352e-04 -4.4233686919597489e-04 -4.3960246260474475e-04 -4.3673967221076709e-04
 -4.3375154972697750e-04 -4.3064114249775052e-04 -4.2741149380010724e-04 -4.2406564314492268e-04 -4.2060662657813336e-04
 -4.1703747698194476e-04 -4.1336122437603891e-04 -4.0958089621878163e-04 -4.0569951770843030e-04 -4.0172011208434121e-04
 -3.9764570092817690e-04 -3.9347930446511411e-04 -3.8922394186505070e-04 -3.8488263154381352e-04 -3.8045839146436577e-04
 -3.7595423943801457e-04 -3.7137319342561833e-04 -3.6671827183879424e-04 -3.6199249384112592e-04 -3.5719887964937074e-04
 -3.5234045083466743e-04 -3.4742023062374344e-04 -3.4244124420012255e-04 -3.3740651900533226e-04 -3.3231908504011143e-04
 -3.2718197516561759e-04 -3.2199822540463445e-04 -3.1677087524277958e-04 -3.1150296792971166e-04 -3.0619755078033814e-04
 -3.0085767547602263e-04 -2.9548639836579247e-04 -2.9008678076754616e-04 -2.8466188926926062e-04 -2.7921479603019934e-04
 -2.7374857908211915e-04 -2.6826632263047818e-04 -2.6277111735564297e-04 -2.5726606071409632e-04 -2.5175425723894458e-04
 -2.4623881865425113e-04 -2.4072286261799387e-04 -2.3520951005161911e-04 -2.2970188226294997e-04 -2.2420309806812076e-04
 -2.1871627091351171e-04 -2.1324450599768334e-04 -2.0779089739331104e-04 -2.0235852516911965e-04 -1.9695045251181796e-04
 -1.9156972284803316e-04 -1.8621935696624557e-04 -1.8090235013872290e-04 -1.7562166924345508e-04 -1.7038024988608847e-04
 -1.6518099352186074e-04 -1.6002676457753512e-04 -1.5492038757333501e-04 -1.4986464424487862e-04 -1.4486227066511337e-04
 -1.3991595436625047e-04 -1.3502833146169946e-04 -1.3020198376800270e-04 -1.2543943592677000e-04 -1.2074315252661301e-04
 -1.1611553522507988e-04 -1.1155891987058971e-04 -1.0707557362436710e-04 -1.0266769208237670e-04 -9.8337396397257782e-05
 -9.4086730400258647e-05 -8.9917657723171215e-05 -8.5832058920265681e-05 -8.1831728590224837e-05 -7.7918372498078723e-05
 -7.4093604697139187e-05 -7.0358944650934319e-05 -6.6715814355143040e-05 -6.3165535459529644e-05 -5.9709326389878280e-05
 -5.6348299469927544e-05 -5.3083458043304965e-05 -4.9915693595461514e-05 -4.6845782875606305e-05 -4.3874385018640810e-05
 -4.1002038667093749e-05 -3.8229159093055274e-05 -3.5556035320111890e-05 -3.2982827245280527e-05 -3.0509562760943466e-05
 -2.8136134876782706e-05 -2.5862298841714481e-05 -2.3687669265823823e-05 -2.1611717242299129e-05 -1.9633767469366589e-05
 -1.7752995372224750e-05 -1.5968424224979249e-05 -1.4278922272650058e-05 -1.2683200114016057e-05 -1.1179811528123321e-05
 -9.7671598393901433e-06 -8.4435056366172899e-06 -7.2069745141777349e-06 -6.0555648132064188e-06 -4.9871553627899801e-06
 -3.9995132211565046e-06 -3.0903014168652720e-06 -2.2570866899964922e-06 -1.4973472333410533e-06 -8.0848043359027485e-07
 -1.8781061252563570e-07  3.6740323179147313e-07  8.5995968383000483e-07  1.2927071693995145e-06  1.6685362144604137e-06
  1.9903717039342282e-06  2.2611651405138490e-06  2.4838869034737935e-06  2.6615185074804669e-06  2.7970448614023962e-06
  2.8934465271205150e-06  2.9536919783384046e-06  2.9807298593925448e-06  2.9774812440625754e-06  2.9468318943815640e-06
  2.8916245194462331e-06  2.8146510342272593e-06  2.7186448183794761e-06  2.6062729750521762e-06  2.4801285896993320e-06
  2.3427229888898941e-06  2.1964779991179980e-06  2.0437182056132632e-06  1.8866632111510198e-06  1.7274198948625567e-06
  1.5679746710454164e-06  1.4101857479736463e-06  1.2557753867080020e-06  1.1063221599062426e-06  9.6325321063342569e-07
  8.2783651117208060e-07  7.0117312183251011e-07  5.8418944976305175e-07  4.7762950776031020e-07  3.8204717307945743e-07
  2.9779844624439400e-07  2.2503370985817625e-07  1.6368998741303022e-07  1.1348320210084827e-07  7.3900435623291136e-08
  4.4192187002101561e-08  2.3364631389346936e-08  1.0171878877697420e-08  3.1082333106210921e-09  4.0045109275696185e-10
  0.0000000000000000e+00
  0.0000000000000000e+00  4.6192808874559171e+02  6.3058346170929156e+02  6.2816856109940613e+02  5.6193719278744732e+02
  5.0774510218895205e+02  4.9662643535072982e+02  5.1742949378813012e+02  5.3629650196811906e+02  5.2671883270393243e+02
  4.8653165062990405e+02  4.3466900553243164e+02  3.9474340347048172e+02  3.7697430604965564e+02  3.7574051906289139e+02
  3.7692820768904153e+02  3.6942301419560056e+02  3.5162630698793248e+02  3.2931971975209325e+02  3.1020502272142454e+02
  2.9807011975569304e+02  2.9169252974310803e+02  2.8707678895248932e+02  2.8067580556814380e+02  2.7158962754558507e+02
  2.6112740483018217e+02  2.5136901860452156e+02  2.4355687543191672e+02  2.3756815497388192e+02  2.3244651739802262e+02
  2.2719854025568461e+02  2.2144880030429732e+02  2.1542470625046204e+02  2.0961744237456980e+02  2.0438367657896922e+02
  1.9974728218136835e+02  1.9550085211487550e+02  1.9138870592221397e+02  1.8728003649733049e+02  1.8319672171277514e+02
  1.7924027716209045e+02  1.7550030532438578e+02  1.7199314051419987e+02  1.6867519090822304e+02  1.6548291227556567e+02
  1.6237444890671495e+02  1.5934413946439159e+02  1.5640844120273363e+02  1.5358590422021598e+02  1.5088065493495901e+02
  1.4828226465766124e+02  1.4577406638210488e+02  1.4334249341589071e+02  1.4098206663178021e+02  1.3869314425365448e+02
  1.3647768574112598e+02  1.3433523236918072e+02  1.3226205296378077e+02  1.3025276015718086e+02  1.2830230252433387e+02
  1.2640736848429741e+02  1.2456616111744826e+02  1.2277752714400322e+02  1.2104004482734678e+02  1.1935164875464764e+02
  1.1770990793372498e+02  1.1611243508511205e+02  1.1455723185707464e+02  1.1304270966906566e+02  1.1156751658099469e+02
  1.1013033850613212e+02  1.0872977895776741e+02  1.0736439507724572e+02  1.0603277837177087e+02  1.0473363037631039e+02
  1.0346578160730307e+02  1.0222815860339078e+02  1.0101974074759026e+02  9.9839526153141833e+01  9.8686531785741820e+01
  9.7559808137699349e+01  9.6458453536930350e+01  9.5381619790715163e+01  9.4328505965720083e+01  9.3298348467333355e+01
  9.2290411374179612e+01  9.1303983825904453e+01  9.0338382021090467e+01  8.9392951010088041e+01  8.8467065215011303e+01
  8.7560126922215346e+01  8.6671563611363922e+01  8.5800824817075323e+01  8.4947380394123670e+01  8.4110720338375373e+01
  8.3290354454498001e+01  8.2485811697031082e+01  8.1696639444510751e+01  8.0922402544746348e+01  8.0162682019481409e+01
  7.9417074006241378e+01  7.8685189332733714e+01  7.7966653026512006e+01  7.7261103623107530e+01  7.6568192619471034e+01
  7.5887584002346429e+01  7.5218953581533725e+01  7.4561988305013131e+01  7.3916385883776144e+01  7.3281854425938775e+01
  7.2658111924197215e+01  7.2044885817757148e+01  7.1441912695023191e+01  7.0848937901566487e+01  7.0265715077949110e+01
  6.9692005855595511e+01  6.9127579605660372e+01  6.8572213090275241e+01  6.8025690121706248e+01  6.7487801345705066e+01
  6.6958343993961492e+01  6.6437121568038791e+01  6.5923943594810225e+01  6.5418625450257167e+01  6.4920988126269876e+01
  6.4430857974154833e+01  6.3948066533971371e+01  6.3472450370569746e+01  6.3003850856986304e+01  6.2542113979746738e+01
  6.2087090208042447e+01  6.1638634336323229e+01  6.1196605295868409e+01  6.0760866015847036e+01  6.0331283310149736e+01
  5.9907727729177680e+01  5.9490073407909776e+01  5.9078197961899804e+01  5.8671982377143721e+01  5.8271310872221683e+01
  5.7876070785135134e+01  5.7486152494513149e+01  5.7101449321666365e+01  5.6721857417222260e+01  5.6347275670402183e+01
  5.5977605619975783e+01  5.5612751344132541e+01  5.5252619368205636e+01  5.4897118624184998e+01  5.4546160409493041e+01
  5.4199658324152260e+01  5.3857528176246518e+01  5.3519687856798832e+01  5.3186057194739547e+01  5.2856557856123267e+01
  5.2531113403518312e+01  5.2209649419785968e+01  5.1892093606952649e+01  5.1578375673925940e+01  5.1268426936706177e+01
  5.0962179840085838e+01  5.0659567622843930e+01  5.0360524724421836e+01  5.0064987706671545e+01  4.9772896196830544e+01
  4.9484192976415947e+01  4.9198822222820965e+01  4.8916727082958857e+01  4.8637847608956648e+01  4.8362122121264960e+01
  4.8089492248213531e+01  4.7819908596492603e+01  4.7553333507691150e+01  4.7289733563827056e+01  4.7029066516481564e+01
  4.6771268515918976e+01  4.6516254940109071e+01  4.6263943858811864e+01  4.6014285791758837e+01  4.5767289929446214e+01
  4.5523026071384145e+01  4.5281606458186040e+01  4.5043164996491484e+01  4.4807840630573629e+01  4.4575772483437113e+01
  4.6237843204902639e+01  4.6358623436663542e+01  4.6467856528058974e+01  4.6565405277330512e+01  4.6651146267793294e+01
  4.6724969846740080e+01  4.6786780092620738e+01  4.6836494770497204e+01  4.6874045275773938e+01  4.6899376566203834e+01
  4.6912447082169543e+01  4.6913228655240360e+01  4.6901706405004525e+01  4.6877878624176965e+01  4.6841756651982529e+01
  4.6793364735814748e+01  4.6732739881169920e+01  4.6659931689856812e+01  4.6575002186481726e+01  4.6478025633209107e+01
  4.6369088332797524e+01  4.6248288419911226e+01  4.6115735640707086e+01  4.5971551120697029e+01  4.5815867120885933e+01
  4.5648826782185040e+01  4.5470583858100731e+01  4.5281302435698890e+01  4.5081156644844590e+01  4.4870330355717428e+01
  4.4649016864602153e+01  4.4417418567954847e+01  4.4175746624744583e+01  4.3924220607070509e+01  4.3663068139054438e+01
  4.3392524524008842e+01  4.3112832359880372e+01  4.2824241142968859e+01  4.2527006859921677e+01  4.2221391568003732e+01
  4.1907662963642743e+01  4.1586093939250119e+01  4.1256962128317291e+01  4.0920549438787404e+01  4.0577141574702608e+01
  4.0227027546126742e+01  3.9870499167343475e+01  3.9507850543330001e+01  3.9139377544506075e+01  3.8765377269758609e+01
  3.8386147497741703e+01  3.8001986126452145e+01  3.7613190601080369e+01  3.7220057330136896e+01  3.6822881089854249e+01
  3.6421954416864253e+01  3.6017566989150957e+01  3.5610004995278885e+01  3.5199550491897099e+01  3.4786480759638991e+01
  3.4371067822103065e+01  3.3953578296747118e+01  3.3534273348366547e+01  3.3113408648550227e+01  3.2691234338731611e+01
  3.2267994996835156e+01  3.1843929607517932e+01  3.1419271536006548e+01  3.0994248505529285e+01  3.0569082578343540e+01
  3.0143990140358479e+01  2.9719181889352964e+01  2.9294862826788741e+01  2.8871232253218892e+01  2.8448483767291531e+01
  2.8026805268348749e+01  2.7606378962620845e+01  2.7187381373015775e+01  2.6769983352503921e+01  2.6354350101098017e+01
  2.5940641186428447e+01  2.5529010567913701e+01  2.5119606624526160e+01  2.4712572186153093e+01  2.4308044568552940e+01
  2.3906155611906822e+01  2.3507031722965340e+01  2.3110793920790613e+01  2.2717557886093562e+01  2.2327434014166485e+01
  2.1940527471410864e+01  2.1556938255460430e+01  2.1176761258899475e+01  2.0800086336576474e+01  2.0426998376512881e+01
  2.0057577374407263e+01  1.9691898511734628e+01  1.9330032237441042e+01  1.8972044353233521e+01  1.8617996102465121e+01
  1.8267944262615341e+01  1.7921941241365754e+01  1.7580035176270915e+01  1.7242270038024497e+01  1.6908685737320720e+01
  1.6579318235311003e+01  1.6254199657655906e+01  1.5933358412172291e+01  1.5616819310075764e+01  1.5304603690818398e+01
  1.4996729550521641e+01  1.4693211674004564e+01  1.4394061770407314e+01  1.4099288612409831e+01  1.3808898179045819e+01
  1.3522893802112032e+01  1.3241276316172712e+01  1.2964044211506518e+01  1.2691193767187341e+01  1.2422719114922932e+01
  1.2158612270047101e+01  1.1898863161738117e+01  1.1643459664212513e+01  1.1392387628894303e+01  1.1145630917559650e+01
  1.0903171436456875e+01  1.0664989171401952e+01  1.0431062223849391e+01  1.0201366847938537e+01  9.9758774885152839e+00
  9.7545668201292095e+00  9.5374057870061204e+00  9.3243636439960245e+00  9.1154079984964902e+00  8.9105048533514708e+00
  8.7096186507254831e+00  8.5127123169532606e+00  8.3197473083647768e+00  8.1306836580857151e+00  7.9454800238133299e+00
  7.7640937365677516e+00  7.5864808504186767e+00  7.4125961931874977e+00  7.2423934181248306e+00  7.0758250565634775e+00
  6.9128425715467863e+00  6.7533964124324353e+00  6.5974360704716313e+00  6.4449101353637319e+00  6.2957663527862602e+00
  6.1499516829003715e+00  6.0074123598316929e+00  5.8680939521266176e+00  5.7319414241839910e+00  5.5988991986622212e+00
  5.4689112198618020e+00  5.3419210180832524e+00  5.2178717749604706e+00  5.0967063897695164e+00  4.9783675467127884e+00
  4.8627977831786255e+00  4.7499395589763296e+00  4.6397353265466066e+00  4.5321276021473986e+00  4.4270590380151678e+00
  4.3244724955015741e+00  4.2243111191855593e+00  4.1265184119608724e+00  4.0310383110989996e+00  3.9378152652874978e+00
  3.8467943126437625e+00  3.7579211597042028e+00  3.6711422613888303e+00  3.5864049019412665e+00  3.5036572768441685e+00
  3.4228485756170151e+00  3.3439290567282804e+00  3.2668500787383681e+00  3.1915640981463058e+00  3.1180246635230304e+00
  3.0461864091232984e+00  2.9760050479796520e+00  2.9074373644784317e+00  2.8404412064178324e+00  2.7749754765480152e+00
  2.7110001235932586e+00  2.6484761327561683e+00  2.5873655157039250e+00  2.5276313000365880e+00  2.4692375182374406e+00
  2.4121491961053918e+00  2.3563323406694141e+00  2.3017539275850454e+00  2.2483818880129238e+00  2.1961850949793789e+00
  2.1451333492190714e+00  2.0951973644996764e+00  2.0463487524286199e+00  1.9985600067418579e+00  1.9518044870747111e+00
  1.9060564022147384e+00  1.8612907928366687e+00  1.8174835137193714e+00  1.7746112154448839e+00  1.7326513255794789e+00
  1.6915820293367860e+00  1.6513822497229580e+00  1.6120316271638893e+00  1.5735104986144766e+00  1.5357998761499332e+00
  1.4988814250391485e+00  1.4627374413000971e+00  1.4273508287372940e+00  1.3927050754613013e+00  1.3587842298902806e+00
  1.3255728762335928e+00  1.2930561094574502e+00  1.2612195097326109e+00  1.2300491163641261e+00  1.1995314012031355e+00
  1.1696532415407075e+00  1.1404018924837267e+00  1.1117649588128395e+00  1.0837303663224322e+00  1.0562863326426748e+00
  1.0294213375435950e+00  1.0031240927212142e+00  9.7738351106572796e-01  9.5218867541172836e-01  9.2752880677048566e-01
  9.0339323204426669e-01  8.7977135122271011e-01  8.5665260406124599e-01  8.3402643624583739e-01  8.1188226694530374e-01
  7.9020947224960991e-01  7.6899738744264590e-01  7.4823531252502617e-01  7.2791251782113120e-01  7.0801824964788951e-01
  6.8854173604530300e-01  6.6947219256871549e-01  6.5079882814282253e-01  6.3251085097742510e-01  6.1459747454492375e-01
  5.9704792361955739e-01  5.7985144037838354e-01  5.6299729056400039e-01  5.4647476970901310e-01  5.3027320942224099e-01
  5.1438198373666799e-01  4.9879051551913506e-01  4.8348828294177598e-01  4.6846482601519468e-01  4.5370975318338563e-01
  4.3921274798039650e-01  4.2496357574873295e-01  4.1095209041950687e-01  3.9716824135432632e-01  3.8360208024892811e-01
  3.7024376809855281e-01  3.5708358222506237e-01  3.4411192336580071e-01  3.3131932282419529e-01  3.1869644968210320e-01
  3.0623411807389794e-01  2.9392329452229982e-01  2.8175510533594855e-01  2.6972084406871760e-01  2.5781197904077252e-01
  2.4602016092137069e-01  2.3433723037340282e-01  2.2275522575967943e-01  2.1126639091095703e-01  1.9986318295570854e-01
  1.8853828021163566e-01  1.7728459013892367e-01  1.6609525735523853e-01  1.5496367171246758e-01  1.4388347643520047e-01
  1.3284857632095498e-01  1.2185314600214467e-01  1.1089163826978710e-01  9.9958792458957946e-02  8.9049642895983938e-02
  7.8159527407381746e-02  6.7284095890536633e-02  5.6419318946124938e-02  4.5561496572278780e-02  3.4707266920493279e-02
  2.3853615113276199e-02  1.2997882123517638e-02  2.1377734148575406e-03 -8.7286370932299871e-03 -1.9602911688479847e-02
 -3.0486256052072610e-02 -4.1379526635888897e-02 -5.2283238180087455e-02 -6.3197571371007011e-02 -7.4122380639391777e-02
 -8.5057202098940785e-02 -9.6001261625180967e-02 -1.0695348307466379e-01 -1.1791249664448582e-01 -1.2887664737213295e-01
 -1.3984400377564835e-01 -1.5081236663412415e-01 -1.6177927790851687e-01 -1.7274202980278663e-01 -1.8369767396535991e-01
 -1.9464303083091627e-01 -2.0557469910249876e-01 -2.1648906537394785e-01 -2.2738231389265937e-01 -2.3825043646266605e-01
 -2.4908924248804284e-01 -2.5989436915663583e-01 -2.7066129176411508e-01 -2.8138533417835104e-01 -2.9206167944411493e-01
 -3.0268538052810257e-01 -3.1325137120428187e-01 -3.2375447707956495e-01 -3.3418942675980229e-01 -3.4455086315610245e-01
 -3.5483335493147411e-01 -3.6503140808779305e-01 -3.7513947769309164e-01 -3.8515197974917287e-01 -3.9506330319954802e-01
 -4.0486782207769778e-01 -4.1455990779565755e-01 -4.2413394157292567e-01 -4.3358432700569627e-01 -4.4290550277641549e-01
 -4.5209195550366166e-01 -4.6113823273234816e-01 -4.7003895606425161e-01 -4.7878883442886305e-01 -4.8738267749456204e-01
 -4.9581540922011613e-01 -5.0408208154650269e-01 -5.1217788822905552e-01 -5.2009817880993370e-01 -5.2783847273091633e-01
 -5.3539447358651904e-01 -5.4276208351743482e-01 -5.4993741774429972e-01 -5.5691681924178038e-01 -5.6369687355298681e-01
 -5.7027442363031722e-01 -5.7664658115717871e-01 -5.8281072739841200e-01 -5.8876450929870483e-01 -5.9450583528616796e-01
 -6.0003287100066827e-01 -6.0534403494691991e-01 -6.1043799407233224e-01 -6.1531365926961612e-01 -6.1997018080414779e-01
 -6.2440694366608995e-01 -6.2862356284727028e-01 -6.3261987854281865e-01 -6.3639595127756110e-01 -6.3995205695717094e-01
 -6.4328868184407884e-01 -6.4640651745813982e-01 -6.4930645540205734e-01 -6.5198958211156588e-01 -6.5445717353037058e-01
 -6.5671068970984514e-01 -6.5875176933348623e-01 -6.6058222416612666e-01 -6.6220403342790546e-01 -6.6361933809299622e-01
 -6.6483043511309192e-01 -6.6583977156564866e-01 -6.6664993872688616e-01 -6.6726366606954646e-01 -6.6768381518540931e-01
 -6.6791337363256675e-01 -6.6795544870745349e-01 -6.6781326114163597e-01 -6.6749013872335938e-01 -6.6698950984385097e-01
 -6.6631489696838242e-01 -6.6546991003208866e-01 -6.6445823976054519e-01 -6.6328365091510266e-01 -6.6194997546297873e-01
 -6.6046110567210803e-01 -6.5882098713074966e-01 -6.5703361169185237e-01 -6.5510301034217655e-01 -6.5303324599617529e-01
 -6.5082840621463212e-01 -6.4849259584805607e-01 -6.4602992960483507e-01 -6.4344452454414658e-01 -6.4074049249362652e-01
 -6.3792193239179440e-01 -6.3499292255523732e-01 -6.3195751287055124e-01 -6.2881971691103966e-01 -6.2558350397817031e-01
 -6.2225279106778864e-01 -6.1883143476109048e-01 -6.1532322304034992e-01 -6.1173186704178817e-01 -6.0806099374122724e-01
 -6.0431414330499711e-01 -6.0049476975212646e-01 -5.9660624193120082e-01 -5.9265184451670572e-01 -5.8863477902464478e-01
 -5.8455816484742829e-01 -5.8042504030803665e-01 -5.7623836373345516e-01 -5.7200101454738317e-01 -5.6771579438221376e-01
 -5.6338542821028881e-01 -5.5901256549442568e-01 -5.5459978135771582e-01 -5.5014957777259810e-01 -5.4566438476920343e-01
 -5.4114656166297315e-01 -5.3659839830154943e-01 -5.3202211633093954e-01 -5.2741987048095185e-01 -5.2279374986990546e-01
 -5.1814577932861194e-01 -5.1347792074363074e-01 -5.0879207441979701e-01 -5.0409008046202186e-01 -4.9937372017636594e-01
 -4.9464471749038591e-01 -4.8990474039275322e-01 -4.8515540239214644e-01 -4.8039826399541558e-01 -4.7563483420502017e-01
 -4.7086657203573906e-01 -4.6609488805065419e-01 -4.6132114591640633e-01 -4.5654666397772398e-01 -4.5177271685122539e-01
 -4.4700053703849246e-01 -4.4223131655841896e-01 -4.3746620859882995e-01 -4.3270632918737506e-01 -4.2795275888169465e-01
 -4.2320654447885764e-01 -4.1846870074407411e-01 -4.1374021215867873e-01 -4.0902203468738813e-01 -4.0431509756483114e-01
 -3.9962030510135110e-01 -3.9493853850808208e-01 -3.9027065774129660e-01 -3.8561750336602757e-01 -3.8097989843896196e-01
 -3.7635865041060790e-01 -3.7175455304673433e-01 -3.6716838836908361e-01 -3.6260092861535687e-01 -3.5805293821847228e-01
 -3.5352517580509613e-01 -3.4901839621304276e-01 -3.4453335239047206e-01 -3.4007079621957520e-01 -3.3563147814920857e-01
 -3.3121614663561033e-01 -3.2682554757724502e-01 -3.2246042374486528e-01 -3.1812151420678925e-01 -3.1380955374939401e-01
 -3.0952527229282539e-01 -3.0526939430192407e-01 -3.0104263819236726e-01 -2.9684571573202717e-01 -2.9267933143754538e-01
 -2.8854418196612330e-01 -2.8444095550252863e-01 -2.8037033114131871e-01 -2.7633297826427883e-01 -2.7232955591307800e-01
 -2.6836071215713975e-01 -2.6442708345672977e-01 -2.6052929402125968e-01 -2.5666795516280616e-01 -2.5284366464484770e-01
 -2.4905700602621605e-01 -2.4530854800026461e-01 -2.4159884372925269e-01 -2.3792843017394621e-01 -2.3429782741843427e-01
 -2.3070753799016194e-01 -2.2715804617517921e-01 -2.2364981732860623e-01 -2.2018329718031451e-01 -2.1675891113582432e-01
 -2.1337706357241842e-01 -2.1003813713047165e-01 -2.0674249199999689e-01 -2.0349046520240707e-01 -2.0028236986749345e-01
 -1.9711849450561997e-01 -1.9399910227513362e-01 -1.9092443024499126e-01 -1.8789468865260237e-01 -1.8491006015688799e-01
 -1.8197069908655597e-01 -1.7907673068359206e-01 -1.7622825034196749e-01 -1.7342532284156251e-01 -1.7066798157730609e-01
 -1.6795622778353178e-01 -1.6529002975355001e-01 -1.6266932205443591e-01 -1.6009400473703386e-01 -1.5756394254117809e-01
 -1.5507896409612917e-01 -1.5263886111622688e-01 -1.5024338759175909e-01 -1.4789225897504718e-01 -1.4558515136175357e-01
 -1.4332170071093239e-01 -1.4110150268774663e-01 -1.3892411358095549e-01 -1.3678905151136611e-01 -1.3469579765783915e-01
 -1.3264379749562968e-01 -1.3063246204706230e-01 -1.2866116914454132e-01 -1.2672926470589568e-01 -1.2483606402205852e-01
 -1.2298085305708158e-01 -1.2116288976048438e-01 -1.1938140539193814e-01 -1.1763560585828439e-01 -1.1592467306288848e-01
 -1.1424776626732772e-01 -1.1260402346541439e-01 -1.1099256276955338e-01 -1.0941248380943480e-01 -1.0786286914306108e-01
 -1.0634278568010902e-01 -1.0485128611762660e-01 -1.0338741038806445e-01 -1.0195018711964213e-01 -1.0053863510904915e-01
 -9.9151764806480872e-02 -9.7788579813009036e-02 -9.6448078390286990e-02 -9.5129254982589895e-02 -9.3831101751189513e-02
 -9.2552610121063833e-02 -9.1292772339941430e-02 -9.0050583049680652e-02 -8.8825040869983385e-02 -8.7615149994443864e-02
 -8.6419921798931904e-02 -8.5238376462311263e-02 -8.4069544599492452e-02 -8.2912468906820427e-02 -8.1766205819797155e-02
 -8.0629827183138658e-02 -7.9502421933167200e-02 -7.8383097792537812e-02 -7.7270982977299937e-02 -7.6165227916293668e-02
 -7.5065006982880669e-02 -7.3969520239010142e-02 -7.2877995191619138e-02 -7.1789688561368067e-02 -7.0703888063710654e-02
 -6.9619914202298752e-02 -6.8537122074721984e-02 -6.7454903190582088e-02 -6.6372687301901975e-02 -6.5289944245869619e-02
 -6.4206185799916687e-02 -6.3120967549131948e-02 -6.2033890766009382e-02 -6.0944604281151823e-02 -5.9852805749146899e-02
 -5.8758241250580420e-02 -5.7660704186148791e-02 -5.6560034129751489e-02 -5.5456115670217465e-02 -5.4348877241665920e-02
 -5.3238289942501058e-02 -5.2124366343041031e-02 -5.1007159281781046e-02 -4.9886760650290581e-02 -4.8763300166744745e-02
 -4.7636944138089846e-02 -4.6507894210842962e-02 -4.5376386110525815e-02 -4.4242688369732663e-02 -4.3107101044832390e-02
 -4.1969954421304717e-02 -4.0831607707710625e-02 -3.9692447718296768e-02 -3.8552887544234200e-02 -3.7413365213491097e-02
 -3.6274342339339738e-02 -3.5136302757497573e-02 -3.3999751151902388e-02 -3.2865211669121729e-02 -3.1733226521396332e-02
 -3.0604354578317814e-02 -2.9479169947140442e-02 -2.8358260541727021e-02 -2.7242226640128989e-02 -2.6131679430800650e-02
 -2.5027239547447427e-02 -2.3929535592508475e-02 -2.2839202649273204e-02 -2.1756880782632118e-02 -2.0683213528461680e-02
 -1.9618846371643444e-02 -1.8564425212717135e-02 -1.7520594823168117e-02 -1.6487997289348778e-02 -1.5467270445034192e-02
 -1.4459046292611884e-02 -1.3463949412905733e-02 -1.2482595363633995e-02 -1.1515589066501537e-02 -1.0563523182926124e-02
 -9.6269764783989391e-03 -8.7065121754791273e-03 -7.8026762954226557e-03 -6.9159959884450813e-03 -6.0469778526187103e-03
 -5.1961062414037102e-03 -4.3638415598134571e-03 -3.5506185492139818e-03 -2.7568445607575888e-03 -1.9828978174506219e-03
 -1.2291256648553162e-03 -4.9584281453389522e-04  2.1667013523776204e-04  9.0816692343421090e-04  1.5784350134888838e-03
  2.2272949054863646e-03  2.8545994418452941e-03  3.4602331065239082e-03  4.0441113177482049e-03  4.6061797142627333e-03
  5.1464134351040256e-03  5.6648163928966393e-03  6.1614205406718405e-03  6.6362851322089326e-03  7.0894959758991639e-03
  7.5211646821323188e-03  7.9314279042059007e-03  8.3204465727569794e-03  8.6884051237166148e-03  9.0355107197869662e-03
  9.3619924654409943e-03  9.6681006154448069e-03  9.9541057769026199e-03  1.0220298104824374e-02  1.0466986491215947e-02
  1.0694497747692013e-02  1.0903175781611544e-02  1.1093380765735905e-02  1.1265488301409611e-02  1.1419888575263699e-02
  1.1556985509441722e-02  1.1677195905348386e-02  1.1780948580920816e-02  1.1868683501422426e-02  1.1940850903759459e-02
  1.1997910414320124e-02  1.2040330160336364e-02  1.2068585874768271e-02  1.2083159994711113e-02  1.2084540753325016e-02
  1.2073221265287211e-02  1.2049698605767007e-02  1.2014472882923302e-02  1.1968046303924779e-02  1.1910922234492706e-02
  1.1843604251966381e-02  1.1766595191891181e-02  1.1680396188129279e-02  1.1585505706492943e-02  1.1482418571900497e-02
  1.1371624989054908e-02  1.1253609556644990e-02  1.1128850275069243e-02  1.0997817547682318e-02  1.0860973175564122e-02
  1.0718769345811520e-02  1.0571647613352730e-02  1.0420037876284274e-02  1.0264357344730584e-02  1.0105009503509545e-02
  9.9423831437258550e-03  9.7768519444588180e-03  9.6087746259971331e-03  9.4384951887349702e-03  9.2663431547140712e-03
  9.0926338114183484e-03  8.9176684578210295e-03  8.7417346526843034e-03  8.5651064651115112e-03  8.3880447273518392e-03
  8.2107972898575517e-03  8.0335992785937442e-03  7.8566733546006039e-03  7.6802299758082157e-03  7.5044676611038851e-03
  7.3295732566519686e-03  7.1557222044662501e-03  6.9830788132348234e-03  6.8117965313975112e-03  6.6420182224757934e-03
  6.4738764426552726e-03  6.3074937206206482e-03  6.1429828396432334e-03  5.9804471219209706e-03  5.8199807151709899e-03
  5.6616688814746900e-03  5.5055882883753224e-03  5.3518073022281202e-03  5.2003862838029494e-03  5.0513778861394614e-03
  4.9048273546548017e-03  4.7607728295038076e-03  4.6192456501917573e-03  4.4802706624396246e-03  4.3438665273018680e-03
  4.2100460325367323e-03  4.0788164062290824e-03  3.9501796326657564e-03  3.8241327704634409e-03  3.7006682729490738e-03
  3.5797743107927674e-03  3.4614350968932531e-03  3.3456312135158495e-03  3.2323399416829580e-03  3.1215355928170875e-03
  3.0131898426363712e-03  2.9072720673026554e-03  2.8037496818220657e-03  2.7025884806981303e-03  2.6037529808374000e-03
  2.5072067667076137e-03  2.4129128377483695e-03  2.3208339580343333e-03  2.2309330081909627e-03  2.1431733395627498e-03
  2.0575191306340026e-03  1.9739357457021251e-03  1.8923900958001960e-03  1.8128509902057652e-03  1.7352893359427295e-03
  1.6596780902358309e-03  1.5859921518396414e-03  1.5142082506081618e-03  1.4443048362949374e-03  1.3762619665836917e-03
  1.3100611943494768e-03  1.2456854541503381e-03  1.1831189479495012e-03  1.1223470300680692e-03  1.0633560913682442e-03
  1.0061334426670582e-03  9.5066719738062680e-04  8.9694615339891708e-04  8.4495967419103205e-04  7.9469756914101451e-04
  7.4614997311416476e-04  6.9930722525387743e-04  6.5415974700899359e-04  6.1069791939167260e-04  5.6891195946577632e-04
  5.2879179606577496e-04  4.9032694474616674e-04  4.5350638196141476e-04  4.1831841847640450e-04  3.8475057200741133e-04
  3.5278943909359086e-04  3.2242056619898523e-04  2.9362832004504221e-04  2.6639575717365770e-04  2.4070449274072914e-04
  2.1653456854023041e-04  1.9386432025880019e-04  1.7267024396084904e-04  1.5292686180418382e-04  1.3460658698614782e-04
  1.1767958792027763e-04  1.0211365164347914e-04  8.7874046453717303e-05  7.4923383778225793e-05  6.3221479272229728e-05
  5.2725213148192619e-05  4.3388389735569364e-05  3.5161596271087773e-05  2.7992060919536521e-05  2.1823510025078663e-05
  1.6596024593077295e-05  1.2245896002438403e-05  8.7054809484710247e-06  5.9030556162674424e-06  3.7626690845936766e-06
  2.2039959603049350e-06  1.1421882432702790e-06  4.8772642181981452e-07  1.4626979870564627e-07  1.8506047581856461e-08
  0.0000000000000000e+00
  0.0000000000000000e+00  4.6192808874559171e+02  6.3058346170929156e+02  6.2816856109940613e+02  5.6193719278744732e+02
  5.0774510218895205e+02  4.9662643535072982e+02  5.1742949378813012e+02  5.3629650196811906e+02  5.2671883270393243e+02
  4.8653165062990405e+02  4.3466900553243164e+02  3.9474340347048172e+02  3.7697430604965564e+02  3.7574051906289139e+02
  3.7692820768904153e+02  3.6942301419560056e+02  3.5162630698793248e+02  3.2931971975209325e+02  3.1020502272142454e+02
  2.9807011975569304e+02  2.9169252974310803e+02  2.8707678895248932e+02  2.8067580556814380e+02  2.7158962754558507e+02
  2.6112740483018217e+02  2.5136901860452156e+02  2.4355687543191672e+02  2.3756815497388192e+02  2.3244651739802262e+02
  2.2719854025568461e+02  2.2144880030429732e+02  2.1542470625046204e+02  2.0961744237456980e+02  2.0438367657896922e+02
  1.9974728218136835e+02  1.9550085211487550e+02  1.9138870592221397e+02  1.8728003649733049e+02  1.8319672171277514e+02
  1.7924027716209045e+02  1.7550030532438578e+02  1.7199314051419987e+02  1.6867519090822304e+02  1.6548291227556567e+02
  1.6237444890671495e+02  1.5934413946439159e+02  1.5640844120273363e+02  1.5358590422021598e+02  1.5088065493495901e+02
  1.4828226465766124e+02  1.4577406638210488e+02  1.4334249341589071e+02  1.4098206663178021e+02  1.3869314425365448e+02
  1.3647768574112598e+02  1.3433523236918072e+02  1.3226205296378077e+02  1.3025276015718086e+02  1.2830230252433387e+02
  1.2640736848429741e+02  1.2456616111744826e+02  1.2277752714400322e+02  1.2104004482734678e+02  1.1935164875464764e+02
  1.1770990793372498e+02  1.1611243508511205e+02  1.1455723185707464e+02  1.1304270966906566e+02  1.1156751658099469e+02
  1.1013033850613212e+02  1.0872977895776741e+02  1.0736439507724572e+02  1.0603277837177087e+02  1.0473363037631039e+02
  1.0346578160730307e+02  1.0222815860339078e+02  1.0101974074759026e+02  9.9839526153141833e+01  9.8686531785741820e+01
  9.7559808137699349e+01  9.6458453536930350e+01  9.5381619790715163e+01  9.4328505965720083e+01  9.3298348467333355e+01
  9.2290411374179612e+01  9.1303983825904453e+01  9.0338382021090467e+01  8.9392951010088041e+01  8.8467065215011303e+01
  8.7560126922215346e+01  8.6671563611363922e+01  8.5800824817075323e+01  8.4947380394123670e+01  8.4110720338375373e+01
  8.3290354454498001e+01  8.2485811697031082e+01  8.1696639444510751e+01  8.0922402544746348e+01  8.0162682019481409e+01
  7.9417074006241378e+01  7.8685189332733714e+01  7.7966653026512006e+01  7.7261103623107530e+01  7.6568192619471034e+01
  7.5887584002346429e+01  7.5218953581533725e+01  7.4561988305013131e+01  7.3916385883776144e+01  7.3281854425938775e+01
  7.2658111924197215e+01  7.2044885817757148e+01  7.1441912695023191e+01  7.0848937901566487e+01  7.0265715077949110e+01
  6.9692005855595511e+01  6.9127579605660372e+01  6.8572213090275241e+01  6.8025690121706248e+01  6.7487801345705066e+01
  6.6958343993961492e+01  6.6437121568038791e+01  6.5923943594810225e+01  6.5418625450257167e+01  6.4920988126269876e+01
  6.4430857974154833e+01  6.3948066533971371e+01  6.3472450370569746e+01  6.3003850856986304e+01  6.2542113979746738e+01
  6.2087090208042447e+01  6.1638634336323229e+01  6.1196605295868409e+01  6.0760866015847036e+01  6.0331283310149736e+01
  5.9907727729177680e+01  5.9490073407909776e+01  5.9078197961899804e+01  5.8671982377143721e+01  5.8271310872221683e+01
  5.7876070785135134e+01  5.7486152494513149e+01  5.7101449321666365e+01  5.6721857417222260e+01  5.6347275670402183e+01
  5.5977605619975783e+01  5.5612751344132541e+01  5.5252619368205636e+01  5.4897118624184998e+01  5.4546160409493041e+01
  5.4199658324152260e+01  5.3857528176246518e+01  5.3519687856798832e+01  5.3186057194739547e+01  5.2856557856123267e+01
  5.2531113403518312e+01  5.2209649419785968e+01  5.1892093606952649e+01  5.1578375673925940e+01  5.1268426936706177e+01
  5.0962179840085838e+01  5.0659567622843930e+01  5.0360524724421836e+01  5.0064987706671545e+01  4.9772896196830544e+01
  4.9484192976415947e+01  4.9198822222820965e+01  4.8916727082958857e+01  4.8637847608956648e+01  4.8362122121264960e+01
  4.8089492248213531e+01  4.7819908596492603e+01  4.7553333507691150e+01  4.7289733563827056e+01  4.7029066516481564e+01
  4.6771268515918976e+01  4.6516254940109071e+01  4.6263943858811864e+01  4.6014285791758837e+01  4.5767289929446214e+01
  4.5523026071384145e+01  4.5281606458186040e+01  4.5043164996491484e+01  4.4807840630573629e+01  4.4575772483437113e+01
  4.6237843204902639e+01  4.6358623436663542e+01  4.6467856528058974e+01  4.6565405277330512e+01  4.6651146267793294e+01
  4.6724969846740080e+01  4.6786780092620738e+01  4.6836494770497204e+01  4.6874045275773938e+01  4.6899376566203834e+01
  4.6912447082169543e+01  4.6913228655240360e+01  4.6901706405004525e+01  4.6877878624176965e+01  4.6841756651982529e+01
  4.6793364735814748e+01  4.6732739881169920e+01  4.6659931689856812e+01  4.6575002186481726e+01  4.6478025633209107e+01
  4.6369088332797524e+01  4.6248288419911226e+01  4.6115735640707086e+01  4.5971551120697029e+01  4.5815867120885933e+01
  4.5648826782185040e+01  4.5470583858100731e+01  4.5281302435698890e+01  4.5081156644844590e+01  4.4870330355717428e+01
  4.4649016864602153e+01  4.4417418567954847e+01  4.4175746624744583e+01  4.3924220607070509e+01  4.3663068139054438e+01
  4.3392524524008842e+01  4.3112832359880372e+01  4.2824241142968859e+01  4.2527006859921677e+01  4.2221391568003732e+01
  4.1907662963642743e+01  4.1586093939250119e+01  4.1256962128317291e+01  4.0920549438787404e+01  4.0577141574702608e+01
  4.0227027546126742e+01  3.9870499167343475e+01  3.9507850543330001e+01  3.9139377544506075e+01  3.8765377269758609e+01
  3.8386147497741703e+01  3.8001986126452145e+01  3.7613190601080369e+01  3.7220057330136896e+01  3.6822881089854249e+01
  3.6421954416864253e+01  3.6017566989150957e+01  3.5610004995278885e+01  3.5199550491897099e+01  3.4786480759638991e+01
  3.4371067822103065e+01  3.3953578296747118e+01  3.3534273348366547e+01  3.3113408648550227e+01  3.2691234338731611e+01
  3.2267994996835156e+01  3.1843929607517932e+01  3.1419271536006548e+01  3.0994248505529285e+01  3.0569082578343540e+01
  3.0143990140358479e+01  2.9719181889352964e+01  2.9294862826788741e+01  2.8871232253218892e+01  2.8448483767291531e+01
  2.8026805268348749e+01  2.7606378962620845e+01  2.7187381373015775e+01  2.6769983352503921e+01  2.6354350101098017e+01
  2.5940641186428447e+01  2.5529010567913701e+01  2.5119606624526160e+01  2.4712572186153093e+01  2.4308044568552940e+01
  2.3906155611906822e+01  2.3507031722965340e+01  2.3110793920790613e+01  2.2717557886093562e+01  2.2327434014166485e+01
  2.1940527471410864e+01  2.1556938255460430e+01  2.1176761258899475e+01  2.0800086336576474e+01  2.0426998376512881e+01
  2.0057577374407263e+01  1.9691898511734628e+01  1.9330032237441042e+01  1.8972044353233521e+01  1.8617996102465121e+01
  1.8267944262615341e+01  1.7921941241365754e+01  1.7580035176270915e+01  1.7242270038024497e+01  1.6908685737320720e+01
  1.6579318235311003e+01  1.6254199657655906e+01  1.5933358412172291e+01  1.5616819310075764e+01  1.5304603690818398e+01
  1.4996729550521641e+01  1.4693211674004564e+01  1.4394061770407314e+01  1.4099288612409831e+01  1.3808898179045819e+01
  1.3522893802112032e+01  1.3241276316172712e+01  1.2964044211506518e+01  1.2691193767187341e+01  1.2422719114922932e+01
  1.2158612270047101e+01  1.1898863161738117e+01  1.1643459664212513e+01  1.1392387628894303e+01  1.1145630917559650e+01
  1.0903171436456875e+01  1.0664989171401952e+01  1.0431062223849391e+01  1.0201366847938537e+01  9.9758774885152839e+00
  9.7545668201292095e+00  9.5374057870061204e+00  9.3243636439960245e+00  9.1154079984964902e+00  8.9105048533514708e+00
  8.7096186507254831e+00  8.5127123169532606e+00  8.3197473083647768e+00  8.1306836580857151e+00  7.9454800238133299e+00
  7.7640937365677516e+00  7.5864808504186767e+00  7.4125961931874977e+00  7.2423934181248306e+00  7.0758250565634775e+00
  6.9128425715467863e+00  6.7533964124324353e+00  6.5974360704716313e+00  6.4449101353637319e+00  6.2957663527862602e+00
  6.1499516829003715e+00  6.0074123598316929e+00  5.8680939521266176e+00  5.7319414241839910e+00  5.5988991986622212e+00
  5.4689112198618020e+00  5.3419210180832524e+00  5.2178717749604706e+00  5.0967063897695164e+00  4.9783675467127884e+00
  4.8627977831786255e+00  4.7499395589763296e+00  4.6397353265466066e+00  4.5321276021473986e+00  4.4270590380151678e+00
  4.3244724955015741e+00  4.2243111191855593e+00  4.1265184119608724e+00  4.0310383110989996e+00  3.9378152652874978e+00
  3.8467943126437625e+00  3.7579211597042028e+00  3.6711422613888303e+00  3.5864049019412665e+00  3.5036572768441685e+00
  3.4228485756170151e+00  3.3439290567282804e+00  3.2668500787383681e+00  3.1915640981463058e+00  3.1180246635230304e+00
  3.0461864091232984e+00  2.9760050479796520e+00  2.9074373644784317e+00  2.8404412064178324e+00  2.7749754765480152e+00
  2.7110001235932586e+00  2.6484761327561683e+00  2.5873655157039250e+00  2.5276313000365880e+00  2.4692375182374406e+00
  2.4121491961053918e+00  2.3563323406694141e+00  2.3017539275850454e+00  2.2483818880129238e+00  2.1961850949793789e+00
  2.1451333492190714e+00  2.0951973644996764e+00  2.0463487524286199e+00  1.9985600067418579e+00  1.9518044870747111e+00
  1.9060564022147384e+00  1.8612907928366687e+00  1.8174835137193714e+00  1.7746112154448839e+00  1.7326513255794789e+00
  1.6915820293367860e+00  1.6513822497229580e+00  1.6120316271638893e+00  1.5735104986144766e+00  1.5357998761499332e+00
  1.4988814250391485e+00  1.4627374413000971e+00  1.4273508287372940e+00  1.3927050754613013e+00  1.3587842298902806e+00
  1.3255728762335928e+00  1.2930561094574502e+00  1.2612195097326109e+00  1.2300491163641261e+00  1.1995314012031355e+00
  1.1696532415407075e+00  1.1404018924837267e+00  1.1117649588128395e+00  1.0837303663224322e+00  1.0562863326426748e+00
  1.0294213375435950e+00  1.0031240927212142e+00  9.7738351106572796e-01  9.5218867541172836e-01  9.2752880677048566e-01
  9.0339323204426669e-01  8.7977135122271011e-01  8.5665260406124599e-01  8.3402643624583739e-01  8.1188226694530374e-01
  7.9020947224960991e-01  7.6899738744264590e-01  7.4823531252502617e-01  7.2791251782113120e-01  7.0801824964788951e-01
  6.8854173604530300e-01  6.6947219256871549e-01  6.5079882814282253e-01  6.3251085097742510e-01  6.1459747454492375e-01
  5.9704792361955739e-01  5.7985144037838354e-01  5.6299729056400039e-01  5.4647476970901310e-01  5.3027320942224099e-01
  5.1438198373666799e-01  4.9879051551913506e-01  4.8348828294177598e-01  4.6846482601519468e-01  4.5370975318338563e-01
  4.3921274798039650e-01  4.2496357574873295e-01  4.1095209041950687e-01  3.9716824135432632e-01  3.8360208024892811e-01
  3.7024376809855281e-01  3.5708358222506237e-01  3.4411192336580071e-01  3.3131932282419529e-01  3.1869644968210320e-01
  3.0623411807389794e-01  2.9392329452229982e-01  2.8175510533594855e-01  2.6972084406871760e-01  2.5781197904077252e-01
  2.4602016092137069e-01  2.3433723037340282e-01  2.2275522575967943e-01  2.1126639091095703e-01  1.9986318295570854e-01
  1.8853828021163566e-01  1.7728459013892367e-01  1.6609525735523853e-01  1.5496367171246758e-01  1.4388347643520047e-01
  1.3284857632095498e-01  1.2185314600214467e-01  1.1089163826978710e-01  9.9958792458957946e-02  8.9049642895983938e-02
  7.8159527407381746e-02  6.7284095890536633e-02  5.6419318946124938e-02  4.5561496572278780e-02  3.4707266920493279e-02
  2.3853615113276199e-02  1.2997882123517638e-02  2.1377734148575406e-03 -8.7286370932299871e-03 -1.9602911688479847e-02
 -3.0486256052072610e-02 -4.1379526635888897e-02 -5.2283238180087455e-02 -6.3197571371007011e-02 -7.4122380639391777e-02
 -8.5057202098940785e-02 -9.6001261625180967e-02 -1.0695348307466379e-01 -1.1791249664448582e-01 -1.2887664737213295e-01
 -1.3984400377564835e-01 -1.5081236663412415e-01 -1.6177927790851687e-01 -1.7274202980278663e-01 -1.8369767396535991e-01
 -1.9464303083091627e-01 -2.0557469910249876e-01 -2.1648906537394785e-01 -2.2738231389265937e-01 -2.3825043646266605e-01
 -2.4908924248804284e-01 -2.5989436915663583e-01 -2.7066129176411508e-01 -2.8138533417835104e-01 -2.9206167944411493e-01
 -3.0268538052810257e-01 -3.1325137120428187e-01 -3.2375447707956495e-01 -3.3418942675980229e-01 -3.4455086315610245e-01
 -3.5483335493147411e-01 -3.6503140808779305e-01 -3.7513947769309164e-01 -3.8515197974917287e-01 -3.9506330319954802e-01
 -4.0486782207769778e-01 -4.1455990779565755e-01 -4.2413394157292567e-01 -4.3358432700569627e-01 -4.4290550277641549e-01
 -4.5209195550366166e-01 -4.6113823273234816e-01 -4.7003895606425161e-01 -4.7878883442886305e-01 -4.8738267749456204e-01
 -4.9581540922011613e-01 -5.0408208154650269e-01 -5.1217788822905552e-01 -5.2009817880993370e-01 -5.2783847273091633e-01
 -5.3539447358651904e-01 -5.4276208351743482e-01 -5.4993741774429972e-01 -5.5691681924178038e-01 -5.6369687355298681e-01
 -5.7027442363031722e-01 -5.7664658115717871e-01 -5.8281072739841200e-01 -5.8876450929870483e-01 -5.9450583528616796e-01
 -6.0003287100066827e-01 -6.0534403494691991e-01 -6.1043799407233224e-01 -6.1531365926961612e-01 -6.1997018080414779e-01
 -6.2440694366608995e-01 -6.2862356284727028e-01 -6.3261987854281865e-01 -6.3639595127756110e-01 -6.3995205695717094e-01
 -6.4328868184407884e-01 -6.4640651745813982e-01 -6.4930645540205734e-01 -6.5198958211156588e-01 -6.5445717353037058e-01
 -6.5671068970984514e-01 -6.5875176933348623e-01 -6.6058222416612666e-01 -6.6220403342790546e-01 -6.6361933809299622e-01
 -6.6483043511309192e-01 -6.6583977156564866e-01 -6.6664993872688616e-01 -6.6726366606954646e-01 -6.6768381518540931e-01
 -6.6791337363256675e-01 -6.6795544870745349e-01 -6.6781326114163597e-01 -6.6749013872335938e-01 -6.6698950984385097e-01
 -6.6631489696838242e-01 -6.6546991003208866e-01 -6.6445823976054519e-01 -6.6328365091510266e-01 -6.6194997546297873e-01
 -6.6046110567210803e-01 -6.5882098713074966e-01 -6.5703361169185237e-01 -6.5510301034217655e-01 -6.5303324599617529e-01
 -6.5082840621463212e-01 -6.4849259584805607e-01 -6.4602992960483507e-01 -6.4344452454414658e-01 -6.4074049249362652e-01
 -6.3792193239179440e-01 -6.3499292255523732e-01 -6.3195751287055124e-01 -6.2881971691103966e-01 -6.2558350397817031e-01
 -6.2225279106778864e-01 -6.1883143476109048e-01 -6.1532322304034992e-01 -6.1173186704178817e-01 -6.0806099374122724e-01
 -6.0431414330499711e-01 -6.0049476975212646e-01 -5.9660624193120082e-01 -5.9265184451670572e-01 -5.8863477902464478e-01
 -5.8455816484742829e-01 -5.8042504030803665e-01 -5.7623836373345516e-01 -5.7200101454738317e-01 -5.6771579438221376e-01
 -5.6338542821028881e-01 -5.5901256549442568e-01 -5.5459978135771582e-01 -5.5014957777259810e-01 -5.4566438476920343e-01
 -5.4114656166297315e-01 -5.3659839830154943e-01 -5.3202211633093954e-01 -5.2741987048095185e-01 -5.2279374986990546e-01
 -5.1814577932861194e-01 -5.1347792074363074e-01 -5.0879207441979701e-01 -5.0409008046202186e-01 -4.9937372017636594e-01
 -4.9464471749038591e-01 -4.8990474039275322e-01 -4.8515540239214644e-01 -4.8039826399541558e-01 -4.7563483420502017e-01
 -4.7086657203573906e-01 -4.6609488805065419e-01 -4.6132114591640633e-01 -4.5654666397772398e-01 -4.5177271685122539e-01
 -4.4700053703849246e-01 -4.4223131655841896e-01 -4.3746620859882995e-01 -4.3270632918737506e-01 -4.2795275888169465e-01
 -4.2320654447885764e-01 -4.1846870074407411e-01 -4.1374021215867873e-01 -4.0902203468738813e-01 -4.0431509756483114e-01
 -3.9962030510135110e-01 -3.9493853850808208e-01 -3.9027065774129660e-01 -3.8561750336602757e-01 -3.8097989843896196e-01
 -3.7635865041060790e-01 -3.7175455304673433e-01 -3.6716838836908361e-01 -3.6260092861535687e-01 -3.5805293821847228e-01
 -3.5352517580509613e-01 -3.4901839621304276e-01 -3.4453335239047206e-01 -3.4007079621957520e-01 -3.3563147814920857e-01
 -3.3121614663561033e-01 -3.2682554757724502e-01 -3.2246042374486528e-01 -3.1812151420678925e-01 -3.1380955374939401e-01
 -3.0952527229282539e-01 -3.0526939430192407e-01 -3.0104263819236726e-01 -2.9684571573202717e-01 -2.9267933143754538e-01
 -2.8854418196612330e-01 -2.8444095550252863e-01 -2.8037033114131871e-01 -2.7633297826427883e-01 -2.7232955591307800e-01
 -2.6836071215713975e-01 -2.6442708345672977e-01 -2.6052929402125968e-01 -2.5666795516280616e-01 -2.5284366464484770e-01
 -2.4905700602621605e-01 -2.4530854800026461e-01 -2.4159884372925269e-01 -2.3792843017394621e-01 -2.3429782741843427e-01
 -2.3070753799016194e-01 -2.2715804617517921e-01 -2.2364981732860623e-01 -2.2018329718031451e-01 -2.1675891113582432e-01
 -2.1337706357241842e-01 -2.1003813713047165e-01 -2.0674249199999689e-01 -2.0349046520240707e-01 -2.0028236986749345e-01
 -1.9711849450561997e-01 -1.9399910227513362e-01 -1.9092443024499126e-01 -1.8789468865260237e-01 -1.8491006015688799e-01
 -1.8197069908655597e-01 -1.7907673068359206e-01 -1.7622825034196749e-01 -1.7342532284156251e-01 -1.7066798157730609e-01
 -1.6795622778353178e-01 -1.6529002975355001e-01 -1.6266932205443591e-01 -1.6009400473703386e-01 -1.5756394254117809e-01
 -1.5507896409612917e-01 -1.5263886111622688e-01 -1.5024338759175909e-01 -1.4789225897504718e-01 -1.4558515136175357e-01
 -1.4332170071093239e-01 -1.4110150268774663e-01 -1.3892411358095549e-01 -1.3678905151136611e-01 -1.3469579765783915e-01
 -1.3264379749562968e-01 -1.3063246204706230e-01 -1.2866116914454132e-01 -1.2672926470589568e-01 -1.2483606402205852e-01
 -1.2298085305708158e-01 -1.2116288976048438e-01 -1.1938140539193814e-01 -1.1763560585828439e-01 -1.1592467306288848e-01
 -1.1424776626732772e-01 -1.1260402346541439e-01 -1.1099256276955338e-01 -1.0941248380943480e-01 -1.0786286914306108e-01
 -1.0634278568010902e-01 -1.0485128611762660e-01 -1.0338741038806445e-01 -1.0195018711964213e-01 -1.0053863510904915e-01
 -9.9151764806480872e-02 -9.7788579813009036e-02 -9.6448078390286990e-02 -9.5129254982589895e-02 -9.3831101751189513e-02
 -9.2552610121063833e-02 -9.1292772339941430e-02 -9.0050583049680652e-02 -8.8825040869983385e-02 -8.7615149994443864e-02
 -8.6419921798931904e-02 -8.5238376462311263e-02 -8.4069544599492452e-02 -8.2912468906820427e-02 -8.1766205819797155e-02
 -8.0629827183138658e-02 -7.9502421933167200e-02 -7.8383097792537812e-02 -7.7270982977299937e-02 -7.6165227916293668e-02
 -7.5065006982880669e-02 -7.3969520239010142e-02 -7.2877995191619138e-02 -7.1789688561368067e-02 -7.0703888063710654e-02
 -6.9619914202298752e-02 -6.8537122074721984e-02 -6.7454903190582088e-02 -6.6372687301901975e-02 -6.5289944245869619e-02
 -6.4206185799916687e-02 -6.3120967549131948e-02 -6.2033890766009382e-02 -6.0944604281151823e-02 -5.9852805749146899e-02
 -5.8758241250580420e-02 -5.7660704186148791e-02 -5.6560034129751489e-02 -5.5456115670217465e-02 -5.4348877241665920e-02
 -5.3238289942501058e-02 -5.2124366343041031e-02 -5.1007159281781046e-02 -4.9886760650290581e-02 -4.8763300166744745e-02
 -4.7636944138089846e-02 -4.6507894210842962e-02 -4.5376386110525815e-02 -4.4242688369732663e-02 -4.3107101044832390e-02
 -4.1969954421304717e-02 -4.0831607707710625e-02 -3.9692447718296768e-02 -3.8552887544234200e-02 -3.7413365213491097e-02
 -3.6274342339339738e-02 -3.5136302757497573e-02 -3.3999751151902388e-02 -3.2865211669121729e-02 -3.1733226521396332e-02
 -3.0604354578317814e-02 -2.9479169947140442e-02 -2.8358260541727021e-02 -2.7242226640128989e-02 -2.6131679430800650e-02
 -2.5027239547447427e-02 -2.3929535592508475e-02 -2.2839202649273204e-02 -2.1756880782632118e-02 -2.0683213528461680e-02
 -1.9618846371643444e-02 -1.8564425212717135e-02 -1.7520594823168117e-02 -1.6487997289348778e-02 -1.5467270445034192e-02
 -1.4459046292611884e-02 -1.3463949412905733e-02 -1.2482595363633995e-02 -1.1515589066501537e-02 -1.0563523182926124e-02
 -9.6269764783989391e-03 -8.7065121754791273e-03 -7.8026762954226557e-03 -6.9159959884450813e-03 -6.0469778526187103e-03
 -5.1961062414037102e-03 -4.3638415598134571e-03 -3.5506185492139818e-03 -2.7568445607575888e-03 -1.9828978174506219e-03
 -1.2291256648553162e-03 -4.9584281453389522e-04  2.1667013523776204e-04  9.0816692343421090e-04  1.5784350134888838e-03
  2.2272949054863646e-03  2.8545994418452941e-03  3.4602331065239082e-03  4.0441113177482049e-03  4.6061797142627333e-03
  5.1464134351040256e-03  5.6648163928966393e-03  6.1614205406718405e-03  6.6362851322089326e-03  7.0894959758991639e-03
  7.5211646821323188e-03  7.9314279042059007e-03  8.3204465727569794e-03  8.6884051237166148e-03  9.0355107197869662e-03
  9.3619924654409943e-03  9.6681006154448069e-03  9.9541057769026199e-03  1.0220298104824374e-02  1.0466986491215947e-02
  1.0694497747692013e-02  1.0903175781611544e-02  1.1093380765735905e-02  1.1265488301409611e-02  1.1419888575263699e-02
  1.1556985509441722e-02  1.1677195905348386e-02  1.1780948580920816e-02  1.1868683501422426e-02  1.1940850903759459e-02
  1.1997910414320124e-02  1.2040330160336364e-02  1.2068585874768271e-02  1.2083159994711113e-02  1.2084540753325016e-02
  1.2073221265287211e-02  1.2049698605767007e-02  1.2014472882923302e-02  1.1968046303924779e-02  1.1910922234492706e-02
  1.1843604251966381e-02  1.1766595191891181e-02  1.1680396188129279e-02  1.1585505706492943e-02  1.1482418571900497e-02
  1.1371624989054908e-02  1.1253609556644990e-02  1.1128850275069243e-02  1.0997817547682318e-02  1.0860973175564122e-02
  1.0718769345811520e-02  1.0571647613352730e-02  1.0420037876284274e-02  1.0264357344730584e-02  1.0105009503509545e-02
  9.9423831437258550e-03  9.7768519444588180e-03  9.6087746259971331e-03  9.4384951887349702e-03  9.2663431547140712e-03
  9.0926338114183484e-03  8.9176684578210295e-03  8.7417346526843034e-03  8.5651064651115112e-03  8.3880447273518392e-03
  8.2107972898575517e-03  8.0335992785937442e-03  7.8566733546006039e-03  7.6802299758082157e-03  7.5044676611038851e-03
  7.3295732566519686e-03  7.1557222044662501e-03  6.9830788132348234e-03  6.8117965313975112e-03  6.6420182224757934e-03
  6.4738764426552726e-03  6.3074937206206482e-03  6.1429828396432334e-03  5.9804471219209706e-03  5.8199807151709899e-03
  5.6616688814746900e-03  5.5055882883753224e-03  5.3518073022281202e-03  5.2003862838029494e-03  5.0513778861394614e-03
  4.9048273546548017e-03  4.7607728295038076e-03  4.6192456501917573e-03  4.4802706624396246e-03  4.3438665273018680e-03
  4.2100460325367323e-03  4.0788164062290824e-03  3.9501796326657564e-03  3.8241327704634409e-03  3.7006682729490738e-03
  3.5797743107927674e-03  3.4614350968932531e-03  3.3456312135158495e-03  3.2323399416829580e-03  3.1215355928170875e-03
  3.0131898426363712e-03  2.9072720673026554e-03  2.8037496818220657e-03  2.7025884806981303e-03  2.6037529808374000e-03
  2.5072067667076137e-03  2.4129128377483695e-03  2.3208339580343333e-03  2.2309330081909627e-03  2.1431733395627498e-03
  2.0575191306340026e-03  1.9739357457021251e-03  1.8923900958001960e-03  1.8128509902057652e-03  1.7352893359427295e-03
  1.6596780902358309e-03  1.5859921518396414e-03  1.5142082506081618e-03  1.4443048362949374e-03  1.3762619665836917e-03
  1.3100611943494768e-03  1.2456854541503381e-03  1.1831189479495012e-03  1.1223470300680692e-03  1.0633560913682442e-03
  1.0061334426670582e-03  9.5066719738062680e-04  8.9694615339891708e-04  8.4495967419103205e-04  7.9469756914101451e-04
  7.4614997311416476e-04  6.9930722525387743e-04  6.5415974700899359e-04  6.1069791939167260e-04  5.6891195946577632e-04
  5.2879179606577496e-04  4.9032694474616674e-04  4.5350638196141476e-04  4.1831841847640450e-04  3.8475057200741133e-04
  3.5278943909359086e-04  3.2242056619898523e-04  2.9362832004504221e-04  2.6639575717365770e-04  2.4070449274072914e-04
  2.1653456854023041e-04  1.9386432025880019e-04  1.7267024396084904e-04  1.5292686180418382e-04  1.3460658698614782e-04
  1.1767958792027763e-04  1.0211365164347914e-04  8.7874046453717303e-05  7.4923383778225793e-05  6.3221479272229728e-05
  5.2725213148192619e-05  4.3388389735569364e-05  3.5161596271087773e-05  2.7992060919536521e-05  2.1823510025078663e-05
  1.6596024593077295e-05  1.2245896002438403e-05  8.7054809484710247e-06  5.9030556162674424e-06  3.7626690845936766e-06
  2.2039959603049350e-06  1.1421882432702790e-06  4.8772642181981452e-07  1.4626979870564627e-07  1.8506047581856461e-08
  0.0000000000000000e+00
  0.0000000000000000e+00  4.6192808874559171e+02  6.3058346170929156e+02  6.2816856109940613e+02  5.6193719278744732e+02
  5.0774510218895205e+02  4.9662643535072982e+02  5.1742949378813012e+02  5.3629650196811906e+02  5.2671883270393243e+02
  4.8653165062990405e+02  4.3466900553243164e+02  3.9474340347048172e+02  3.7697430604965564e+02  3.7574051906289139e+02
  3.7692820768904153e+02  3.6942301419560056e+02  3.5162630698793248e+02  3.2931971975209325e+02  3.1020502272142454e+02
  2.9807011975569304e+02  2.9169252974310803e+02  2.8707678895248932e+02  2.8067580556814380e+02  2.7158962754558507e+02
  2.6112740483018217e+02  2.5136901860452156e+02  2.4355687543191672e+02  2.3756815497388192e+02  2.3244651739802262e+02
  2.2719854025568461e+02  2.2144880030429732e+02  2.1542470625046204e+02  2.0961744237456980e+02  2.0438367657896922e+02
  1.9974728218136835e+02  1.9550085211487550e+02  1.9138870592221397e+02  1.8728003649733049e+02  1.8319672171277514e+02
  1.7924027716209045e+02  1.7550030532438578e+02  1.7199314051419987e+02  1.6867519090822304e+02  1.6548291227556567e+02
  1.6237444890671495e+02  1.5934413946439159e+02  1.5640844120273363e+02  1.5358590422021598e+02  1.5088065493495901e+02
  1.4828226465766124e+02  1.4577406638210488e+02  1.4334249341589071e+02  1.4098206663178021e+02  1.3869314425365448e+02
  1.3647768574112598e+02  1.3433523236918072e+02  1.3226205296378077e+02  1.3025276015718086e+02  1.2830230252433387e+02
  1.2640736848429741e+02  1.2456616111744826e+02  1.2277752714400322e+02  1.2104004482734678e+02  1.1935164875464764e+02
  1.1770990793372498e+02  1.1611243508511205e+02  1.1455723185707464e+02  1.1304270966906566e+02  1.1156751658099469e+02
  1.1013033850613212e+02  1.0872977895776741e+02  1.0736439507724572e+02  1.0603277837177087e+02  1.0473363037631039e+02
  1.0346578160730307e+02  1.0222815860339078e+02  1.0101974074759026e+02  9.9839526153141833e+01  9.8686531785741820e+01
  9.7559808137699349e+01  9.6458453536930350e+01  9.5381619790715163e+01  9.4328505965720083e+01  9.3298348467333355e+01
  9.2290411374179612e+01  9.1303983825904453e+01  9.0338382021090467e+01  8.9392951010088041e+01  8.8467065215011303e+01
  8.7560126922215346e+01  8.6671563611363922e+01  8.5800824817075323e+01  8.4947380394123670e+01  8.4110720338375373e+01
  8.3290354454498001e+01  8.2485811697031082e+01  8.1696639444510751e+01  8.0922402544746348e+01  8.0162682019481409e+01
  7.9417074006241378e+01  7.8685189332733714e+01  7.7966653026512006e+01  7.7261103623107530e+01  7.6568192619471034e+01
  7.5887584002346429e+01  7.5218953581533725e+01  7.4561988305013131e+01  7.3916385883776144e+01  7.3281854425938775e+01
  7.2658111924197215e+01  7.2044885817757148e+01  7.1441912695023191e+01  7.0848937901566487e+01  7.0265715077949110e+01
  6.9692005855595511e+01  6.9127579605660372e+01  6.8572213090275241e+01  6.8025690121706248e+01  6.7487801345705066e+01
  6.6958343993961492e+01  6.6437121568038791e+01  6.5923943594810225e+01  6.5418625450257167e+01  6.4920988126269876e+01
  6.4430857974154833e+01  6.3948066533971371e+01  6.3472450370569746e+01  6.3003850856986304e+01  6.2542113979746738e+01
  6.2087090208042447e+01  6.1638634336323229e+01  6.1196605295868409e+01  6.0760866015847036e+01  6.0331283310149736e+01
  5.9907727729177680e+01  5.9490073407909776e+01  5.9078197961899804e+01  5.8671982377143721e+01  5.8271310872221683e+01
  5.7876070785135134e+01  5.7486152494513149e+01  5.7101449321666365e+01  5.6721857417222260e+01  5.6347275670402183e+01
  5.5977605619975783e+01  5.5612751344132541e+01  5.5252619368205636e+01  5.4897118624184998e+01  5.4546160409493041e+01
  5.4199658324152260e+01  5.3857528176246518e+01  5.3519687856798832e+01  5.3186057194739547e+01  5.2856557856123267e+01
  5.2531113403518312e+01  5.2209649419785968e+01  5.1892093606952649e+01  5.1578375673925940e+01  5.1268426936706177e+01
  5.0962179840085838e+01  5.0659567622843930e+01  5.0360524724421836e+01  5.0064987706671545e+01  4.9772896196830544e+01
  4.9484192976415947e+01  4.9198822222820965e+01  4.8916727082958857e+01  4.8637847608956648e+01  4.8362122121264960e+01
  4.8089492248213531e+01  4.7819908596492603e+01  4.7553333507691150e+01  4.7289733563827056e+01  4.7029066516481564e+01
  4.6771268515918976e+01  4.6516254940109071e+01  4.6263943858811864e+01  4.6014285791758837e+01  4.5767289929446214e+01
  4.5523026071384145e+01  4.5281606458186040e+01  4.5043164996491484e+01  4.4807840630573629e+01  4.4575772483437113e+01
  4.6237843204902639e+01  4.6358623436663542e+01  4.6467856528058974e+01  4.6565405277330512e+01  4.6651146267793294e+01
  4.6724969846740080e+01  4.6786780092620738e+01  4.6836494770497204e+01  4.6874045275773938e+01  4.6899376566203834e+01
  4.6912447082169543e+01  4.6913228655240360e+01  4.6901706405004525e+01  4.6877878624176965e+01  4.6841756651982529e+01
  4.6793364735814748e+01  4.6732739881169920e+01  4.6659931689856812e+01  4.6575002186481726e+01  4.6478025633209107e+01
  4.6369088332797524e+01  4.6248288419911226e+01  4.6115735640707086e+01  4.5971551120697029e+01  4.5815867120885933e+01
  4.5648826782185040e+01  4.5470583858100731e+01  4.5281302435698890e+01  4.5081156644844590e+01  4.4870330355717428e+01
  4.4649016864602153e+01  4.4417418567954847e+01  4.4175746624744583e+01  4.3924220607070509e+01  4.3663068139054438e+01
  4.3392524524008842e+01  4.3112832359880372e+01  4.2824241142968859e+01  4.2527006859921677e+01  4.2221391568003732e+01
  4.1907662963642743e+01  4.1586093939250119e+01  4.1256962128317291e+01  4.0920549438787404e+01  4.0577141574702608e+01
  4.0227027546126742e+01  3.9870499167343475e+01  3.9507850543330001e+01  3.9139377544506075e+01  3.8765377269758609e+01
  3.8386147497741703e+01  3.8001986126452145e+01  3.7613190601080369e+01  3.7220057330136896e+01  3.6822881089854249e+01
  3.6421954416864253e+01  3.6017566989150957e+01  3.5610004995278885e+01  3.5199550491897099e+01  3.4786480759638991e+01
  3.4371067822103065e+01  3.3953578296747118e+01  3.3534273348366547e+01  3.3113408648550227e+01  3.2691234338731611e+01
  3.2267994996835156e+01  3.1843929607517932e+01  3.1419271536006548e+01  3.0994248505529285e+01  3.0569082578343540e+01
  3.0143990140358479e+01  2.9719181889352964e+01  2.9294862826788741e+01  2.8871232253218892e+01  2.8448483767291531e+01
  2.8026805268348749e+01  2.7606378962620845e+01  2.7187381373015775e+01  2.6769983352503921e+01  2.6354350101098017e+01
  2.5940641186428447e+01  2.5529010567913701e+01  2.5119606624526160e+01  2.4712572186153093e+01  2.4308044568552940e+01
  2.3906155611906822e+01  2.3507031722965340e+01  2.3110793920790613e+01  2.2717557886093562e+01  2.2327434014166485e+01
  2.1940527471410864e+01  2.1556938255460430e+01  2.1176761258899475e+01  2.0800086336576474e+01  2.0426998376512881e+01
  2.0057577374407263e+01  1.9691898511734628e+01  1.9330032237441042e+01  1.8972044353233521e+01  1.8617996102465121e+01
  1.8267944262615341e+01  1.7921941241365754e+01  1.7580035176270915e+01  1.7242270038024497e+01  1.6908685737320720e+01
  1.6579318235311003e+01  1.6254199657655906e+01  1.5933358412172291e+01  1.5616819310075764e+01  1.5304603690818398e+01
  1.4996729550521641e+01  1.4693211674004564e+01  1.4394061770407314e+01  1.4099288612409831e+01  1.3808898179045819e+01
  1.3522893802112032e+01  1.3241276316172712e+01  1.2964044211506518e+01  1.2691193767187341e+01  1.2422719114922932e+01
  1.2158612270047101e+01  1.1898863161738117e+01  1.1643459664212513e+01  1.1392387628894303e+01  1.1145630917559650e+01
  1.0903171436456875e+01  1.0664989171401952e+01  1.0431062223849391e+01  1.0201366847938537e+01  9.9758774885152839e+00
  9.7545668201292095e+00  9.5374057870061204e+00  9.3243636439960245e+00  9.1154079984964902e+00  8.9105048533514708e+00
  8.7096186507254831e+00  8.5127123169532606e+00  8.3197473083647768e+00  8.1306836580857151e+00  7.9454800238133299e+00
  7.7640937365677516e+00  7.5864808504186767e+00  7.4125961931874977e+00  7.2423934181248306e+00  7.0758250565634775e+00
  6.9128425715467863e+00  6.7533964124324353e+00  6.5974360704716313e+00  6.4449101353637319e+00  6.2957663527862602e+00
  6.1499516829003715e+00  6.0074123598316929e+00  5.8680939521266176e+00  5.7319414241839910e+00  5.5988991986622212e+00
  5.4689112198618020e+00  5.3419210180832524e+00  5.2178717749604706e+00  5.0967063897695164e+00  4.9783675467127884e+00
  4.8627977831786255e+00  4.7499395589763296e+00  4.6397353265466066e+00  4.5321276021473986e+00  4.4270590380151678e+00
  4.3244724955015741e+00  4.2243111191855593e+00  4.1265184119608724e+00  4.0310383110989996e+00  3.9378152652874978e+00
  3.8467943126437625e+00  3.7579211597042028e+00  3.6711422613888303e+00  3.5864049019412665e+00  3.5036572768441685e+00
  3.4228485756170151e+00  3.3439290567282804e+00  3.2668500787383681e+00  3.1915640981463058e+00  3.1180246635230304e+00
  3.0461864091232984e+00  2.9760050479796520e+00  2.9074373644784317e+00  2.8404412064178324e+00  2.7749754765480152e+00
  2.7110001235932586e+00  2.6484761327561683e+00  2.5873655157039250e+00  2.5276313000365880e+00  2.4692375182374406e+00
  2.4121491961053918e+00  2.3563323406694141e+00  2.3017539275850454e+00  2.2483818880129238e+00  2.1961850949793789e+00
  2.1451333492190714e+00  2.0951973644996764e+00  2.0463487524286199e+00  1.9985600067418579e+00  1.9518044870747111e+00
  1.9060564022147384e+00  1.8612907928366687e+00  1.8174835137193714e+00  1.7746112154448839e+00  1.7326513255794789e+00
  1.6915820293367860e+00  1.6513822497229580e+00  1.6120316271638893e+00  1.5735104986144766e+00  1.5357998761499332e+00
  1.4988814250391485e+00  1.4627374413000971e+00  1.4273508287372940e+00  1.3927050754613013e+00  1.3587842298902806e+00
  1.3255728762335928e+00  1.2930561094574502e+00  1.2612195097326109e+00  1.2300491163641261e+00  1.1995314012031355e+00
  1.1696532415407075e+00  1.1404018924837267e+00  1.1117649588128395e+00  1.0837303663224322e+00  1.0562863326426748e+00
  1.0294213375435950e+00  1.0031240927212142e+00  9.7738351106572796e-01  9.5218867541172836e-01  9.2752880677048566e-01
  9.0339323204426669e-01  8.7977135122271011e-01  8.5665260406124599e-01  8.3402643624583739e-01  8.1188226694530374e-01
  7.9020947224960991e-01  7.6899738744264590e-01  7.4823531252502617e-01  7.2791251782113120e-01  7.0801824964788951e-01
  6.8854173604530300e-01  6.6947219256871549e-01  6.5079882814282253e-01  6.3251085097742510e-01  6.1459747454492375e-01
  5.9704792361955739e-01  5.7985144037838354e-01  5.6299729056400039e-01  5.4647476970901310e-01  5.3027320942224099e-01
  5.1438198373666799e-01  4.9879051551913506e-01  4.8348828294177598e-01  4.6846482601519468e-01  4.5370975318338563e-01
  4.3921274798039650e-01  4.2496357574873295e-01  4.1095209041950687e-01  3.9716824135432632e-01  3.8360208024892811e-01
  3.7024376809855281e-01  3.5708358222506237e-01  3.4411192336580071e-01  3.3131932282419529e-01  3.1869644968210320e-01
  3.0623411807389794e-01  2.9392329452229982e-01  2.8175510533594855e-01  2.6972084406871760e-01  2.5781197904077252e-01
  2.4602016092137069e-01  2.3433723037340282e-01  2.2275522575967943e-01  2.1126639091095703e-01  1.9986318295570854e-01
  1.8853828021163566e-01  1.7728459013892367e-01  1.6609525735523853e-01  1.5496367171246758e-01  1.4388347643520047e-01
  1.3284857632095498e-01  1.2185314600214467e-01  1.1089163826978710e-01  9.9958792458957946e-02  8.9049642895983938e-02
  7.8159527407381746e-02  6.7284095890536633e-02  5.6419318946124938e-02  4.5561496572278780e-02  3.4707266920493279e-02
  2.3853615113276199e-02  1.2997882123517638e-02  2.1377734148575406e-03 -8.7286370932299871e-03 -1.9602911688479847e-02
 -3.0486256052072610e-02 -4.1379526635888897e-02 -5.2283238180087455e-02 -6.3197571371007011e-02 -7.4122380639391777e-02
 -8.5057202098940785e-02 -9.6001261625180967e-02 -1.0695348307466379e-01 -1.1791249664448582e-01 -1.2887664737213295e-01
 -1.3984400377564835e-01 -1.5081236663412415e-01 -1.6177927790851687e-01 -1.7274202980278663e-01 -1.8369767396535991e-01
 -1.9464303083091627e-01 -2.0557469910249876e-01 -2.1648906537394785e-01 -2.2738231389265937e-01 -2.3825043646266605e-01
 -2.4908924248804284e-01 -2.5989436915663583e-01 -2.7066129176411508e-01 -2.8138533417835104e-01 -2.9206167944411493e-01
 -3.0268538052810257e-01 -3.1325137120428187e-01 -3.2375447707956495e-01 -3.3418942675980229e-01 -3.4455086315610245e-01
 -3.5483335493147411e-01 -3.6503140808779305e-01 -3.7513947769309164e-01 -3.8515197974917287e-01 -3.9506330319954802e-01
 -4.0486782207769778e-01 -4.1455990779565755e-01 -4.2413394157292567e-01 -4.3358432700569627e-01 -4.4290550277641549e-01
 -4.5209195550366166e-01 -4.6113823273234816e-01 -4.7003895606425161e-01 -4.7878883442886305e-01 -4.8738267749456204e-01
 -4.9581540922011613e-01 -5.0408208154650269e-01 -5.1217788822905552e-01 -5.2009817880993370e-01 -5.2783847273091633e-01
 -5.3539447358651904e-01 -5.4276208351743482e-01 -5.4993741774429972e-01 -5.5691681924178038e-01 -5.6369687355298681e-01
 -5.7027442363031722e-01 -5.7664658115717871e-01 -5.8281072739841200e-01 -5.8876450929870483e-01 -5.9450583528616796e-01
 -6.0003287100066827e-01 -6.0534403494691991e-01 -6.1043799407233224e-01 -6.1531365926961612e-01 -6.1997018080414779e-01
 -6.2440694366608995e-01 -6.2862356284727028e-01 -6.3261987854281865e-01 -6.3639595127756110e-01 -6.3995205695717094e-01
 -6.4328868184407884e-01 -6.4640651745813982e-01 -6.4930645540205734e-01 -6.5198958211156588e-01 -6.5445717353037058e-01
 -6.5671068970984514e-01 -6.5875176933348623e-01 -6.6058222416612666e-01 -6.6220403342790546e-01 -6.6361933809299622e-01
 -6.6483043511309192e-01 -6.6583977156564866e-01 -6.6664993872688616e-01 -6.6726366606954646e-01 -6.6768381518540931e-01
 -6.6791337363256675e-01 -6.6795544870745349e-01 -6.6781326114163597e-01 -6.6749013872335938e-01 -6.6698950984385097e-01
 -6.6631489696838242e-01 -6.6546991003208866e-01 -6.6445823976054519e-01 -6.6328365091510266e-01 -6.6194997546297873e-01
 -6.6046110567210803e-01 -6.5882098713074966e-01 -6.5703361169185237e-01 -6.5510301034217655e-01 -6.5303324599617529e-01
 -6.5082840621463212e-01 -6.4849259584805607e-01 -6.4602992960483507e-01 -6.4344452454414658e-01 -6.4074049249362652e-01
 -6.3792193239179440e-01 -6.3499292255523732e-01 -6.3195751287055124e-01 -6.2881971691103966e-01 -6.2558350397817031e-01
 -6.2225279106778864e-01 -6.1883143476109048e-01 -6.1532322304034992e-01 -6.1173186704178817e-01 -6.0806099374122724e-01
 -6.0431414330499711e-01 -6.0049476975212646e-01 -5.9660624193120082e-01 -5.9265184451670572e-01 -5.8863477902464478e-01
 -5.8455816484742829e-01 -5.8042504030803665e-01 -5.7623836373345516e-01 -5.7200101454738317e-01 -5.6771579438221376e-01
 -5.6338542821028881e-01 -5.5901256549442568e-01 -5.5459978135771582e-01 -5.5014957777259810e-01 -5.4566438476920343e-01
 -5.4114656166297315e-01 -5.3659839830154943e-01 -5.3202211633093954e-01 -5.2741987048095185e-01 -5.2279374986990546e-01
 -5.1814577932861194e-01 -5.1347792074363074e-01 -5.0879207441979701e-01 -5.0409008046202186e-01 -4.9937372017636594e-01
 -4.9464471749038591e-01 -4.8990474039275322e-01 -4.8515540239214644e-01 -4.8039826399541558e-01 -4.7563483420502017e-01
 -4.7086657203573906e-01 -4.6609488805065419e-01 -4.6132114591640633e-01 -4.5654666397772398e-01 -4.5177271685122539e-01
 -4.4700053703849246e-01 -4.4223131655841896e-01 -4.3746620859882995e-01 -4.3270632918737506e-01 -4.2795275888169465e-01
 -4.2320654447885764e-01 -4.1846870074407411e-01 -4.1374021215867873e-01 -4.0902203468738813e-01 -4.0431509756483114e-01
 -3.9962030510135110e-01 -3.9493853850808208e-01 -3.9027065774129660e-01 -3.8561750336602757e-01 -3.8097989843896196e-01
 -3.7635865041060790e-01 -3.7175455304673433e-01 -3.6716838836908361e-01 -3.6260092861535687e-01 -3.5805293821847228e-01
 -3.5352517580509613e-01 -3.4901839621304276e-01 -3.4453335239047206e-01 -3.4007079621957520e-01 -3.3563147814920857e-01
 -3.3121614663561033e-01 -3.2682554757724502e-01 -3.2246042374486528e-01 -3.1812151420678925e-01 -3.1380955374939401e-01
 -3.0952527229282539e-01 -3.0526939430192407e-01 -3.0104263819236726e-01 -2.9684571573202717e-01 -2.9267933143754538e-01
 -2.8854418196612330e-01 -2.8444095550252863e-01 -2.8037033114131871e-01 -2.7633297826427883e-01 -2.7232955591307800e-01
 -2.6836071215713975e-01 -2.6442708345672977e-01 -2.6052929402125968e-01 -2.5666795516280616e-01 -2.5284366464484770e-01
 -2.4905700602621605e-01 -2.4530854800026461e-01 -2.4159884372925269e-01 -2.3792843017394621e-01 -2.3429782741843427e-01
 -2.3070753799016194e-01 -2.2715804617517921e-01 -2.2364981732860623e-01 -2.2018329718031451e-01 -2.1675891113582432e-01
 -2.1337706357241842e-01 -2.1003813713047165e-01 -2.0674249199999689e-01 -2.0349046520240707e-01 -2.0028236986749345e-01
 -1.9711849450561997e-01 -1.9399910227513362e-01 -1.9092443024499126e-01 -1.8789468865260237e-01 -1.8491006015688799e-01
 -1.8197069908655597e-01 -1.7907673068359206e-01 -1.7622825034196749e-01 -1.7342532284156251e-01 -1.7066798157730609e-01
 -1.6795622778353178e-01 -1.6529002975355001e-01 -1.6266932205443591e-01 -1.6009400473703386e-01 -1.5756394254117809e-01
 -1.5507896409612917e-01 -1.5263886111622688e-01 -1.5024338759175909e-01 -1.4789225897504718e-01 -1.4558515136175357e-01
 -1.4332170071093239e-01 -1.4110150268774663e-01 -1.3892411358095549e-01 -1.3678905151136611e-01 -1.3469579765783915e-01
 -1.3264379749562968e-01 -1.3063246204706230e-01 -1.2866116914454132e-01 -1.2672926470589568e-01 -1.2483606402205852e-01
 -1.2298085305708158e-01 -1.2116288976048438e-01 -1.1938140539193814e-01 -1.1763560585828439e-01 -1.1592467306288848e-01
 -1.1424776626732772e-01 -1.1260402346541439e-01 -1.1099256276955338e-01 -1.0941248380943480e-01 -1.0786286914306108e-01
 -1.0634278568010902e-01 -1.0485128611762660e-01 -1.0338741038806445e-01 -1.0195018711964213e-01 -1.0053863510904915e-01
 -9.9151764806480872e-02 -9.7788579813009036e-02 -9.6448078390286990e-02 -9.5129254982589895e-02 -9.3831101751189513e-02
 -9.2552610121063833e-02 -9.1292772339941430e-02 -9.0050583049680652e-02 -8.8825040869983385e-02 -8.7615149994443864e-02
 -8.6419921798931904e-02 -8.5238376462311263e-02 -8.4069544599492452e-02 -8.2912468906820427e-02 -8.1766205819797155e-02
 -8.0629827183138658e-02 -7.9502421933167200e-02 -7.8383097792537812e-02 -7.7270982977299937e-02 -7.6165227916293668e-02
 -7.5065006982880669e-02 -7.3969520239010142e-02 -7.2877995191619138e-02 -7.1789688561368067e-02 -7.0703888063710654e-02
 -6.9619914202298752e-02 -6.8537122074721984e-02 -6.7454903190582088e-02 -6.6372687301901975e-02 -6.5289944245869619e-02
 -6.4206185799916687e-02 -6.3120967549131948e-02 -6.2033890766009382e-02 -6.0944604281151823e-02 -5.9852805749146899e-02
 -5.8758241250580420e-02 -5.7660704186148791e-02 -5.6560034129751489e-02 -5.5456115670217465e-02 -5.4348877241665920e-02
 -5.3238289942501058e-02 -5.2124366343041031e-02 -5.1007159281781046e-02 -4.9886760650290581e-02 -4.8763300166744745e-02
 -4.7636944138089846e-02 -4.6507894210842962e-02 -4.5376386110525815e-02 -4.4242688369732663e-02 -4.3107101044832390e-02
 -4.1969954421304717e-02 -4.0831607707710625e-02 -3.9692447718296768e-02 -3.8552887544234200e-02 -3.7413365213491097e-02
 -3.6274342339339738e-02 -3.5136302757497573e-02 -3.3999751151902388e-02 -3.2865211669121729e-02 -3.1733226521396332e-02
 -3.0604354578317814e-02 -2.9479169947140442e-02 -2.8358260541727021e-02 -2.7242226640128989e-02 -2.6131679430800650e-02
 -2.5027239547447427e-02 -2.3929535592508475e-02 -2.2839202649273204e-02 -2.1756880782632118e-02 -2.0683213528461680e-02
 -1.9618846371643444e-02 -1.8564425212717135e-02 -1.7520594823168117e-02 -1.6487997289348778e-02 -1.5467270445034192e-02
 -1.4459046292611884e-02 -1.3463949412905733e-02 -1.2482595363633995e-02 -1.1515589066501537e-02 -1.0563523182926124e-02
 -9.6269764783989391e-03 -8.7065121754791273e-03 -7.8026762954226557e-03 -6.9159959884450813e-03 -6.0469778526187103e-03
 -5.1961062414037102e-03 -4.3638415598134571e-03 -3.5506185492139818e-03 -2.7568445607575888e-03 -1.9828978174506219e-03
 -1.2291256648553162e-03 -4.9584281453389522e-04  2.1667013523776204e-04  9.0816692343421090e-04  1.5784350134888838e-03
  2.2272949054863646e-03  2.8545994418452941e-03  3.4602331065239082e-03  4.0441113177482049e-03  4.6061797142627333e-03
  5.1464134351040256e-03  5.6648163928966393e-03  6.1614205406718405e-03  6.6362851322089326e-03  7.0894959758991639e-03
  7.5211646821323188e-03  7.9314279042059007e-03  8.3204465727569794e-03  8.6884051237166148e-03  9.0355107197869662e-03
  9.3619924654409943e-03  9.6681006154448069e-03  9.9541057769026199e-03  1.0220298104824374e-02  1.0466986491215947e-02
  1.0694497747692013e-02  1.0903175781611544e-02  1.1093380765735905e-02  1.1265488301409611e-02  1.1419888575263699e-02
  1.1556985509441722e-02  1.1677195905348386e-02  1.1780948580920816e-02  1.1868683501422426e-02  1.1940850903759459e-02
  1.1997910414320124e-02  1.2040330160336364e-02  1.2068585874768271e-02  1.2083159994711113e-02  1.2084540753325016e-02
  1.2073221265287211e-02  1.2049698605767007e-02  1.2014472882923302e-02  1.1968046303924779e-02  1.1910922234492706e-02
  1.1843604251966381e-02  1.1766595191891181e-02  1.1680396188129279e-02  1.1585505706492943e-02  1.1482418571900497e-02
  1.1371624989054908e-02  1.1253609556644990e-02  1.1128850275069243e-02  1.0997817547682318e-02  1.0860973175564122e-02
  1.0718769345811520e-02  1.0571647613352730e-02  1.0420037876284274e-02  1.0264357344730584e-02  1.0105009503509545e-02
  9.9423831437258550e-03  9.7768519444588180e-03  9.6087746259971331e-03  9.4384951887349702e-03  9.2663431547140712e-03
  9.0926338114183484e-03  8.9176684578210295e-03  8.7417346526843034e-03  8.5651064651115112e-03  8.3880447273518392e-03
  8.2107972898575517e-03  8.0335992785937442e-03  7.8566733546006039e-03  7.6802299758082157e-03  7.5044676611038851e-03
  7.3295732566519686e-03  7.1557222044662501e-03  6.9830788132348234e-03  6.8117965313975112e-03  6.6420182224757934e-03
  6.4738764426552726e-03  6.3074937206206482e-03  6.1429828396432334e-03  5.9804471219209706e-03  5.8199807151709899e-03
  5.6616688814746900e-03  5.5055882883753224e-03  5.3518073022281202e-03  5.2003862838029494e-03  5.0513778861394614e-03
  4.9048273546548017e-03  4.7607728295038076e-03  4.6192456501917573e-03  4.4802706624396246e-03  4.3438665273018680e-03
  4.2100460325367323e-03  4.0788164062290824e-03  3.9501796326657564e-03  3.8241327704634409e-03  3.7006682729490738e-03
  3.5797743107927674e-03  3.4614350968932531e-03  3.3456312135158495e-03  3.2323399416829580e-03  3.1215355928170875e-03
  3.0131898426363712e-03  2.9072720673026554e-03  2.8037496818220657e-03  2.7025884806981303e-03  2.6037529808374000e-03
  2.5072067667076137e-03  2.4129128377483695e-03  2.3208339580343333e-03  2.2309330081909627e-03  2.1431733395627498e-03
  2.0575191306340026e-03  1.9739357457021251e-03  1.8923900958001960e-03  1.8128509902057652e-03  1.7352893359427295e-03
  1.6596780902358309e-03  1.5859921518396414e-03  1.5142082506081618e-03  1.4443048362949374e-03  1.3762619665836917e-03
  1.3100611943494768e-03  1.2456854541503381e-03  1.1831189479495012e-03  1.1223470300680692e-03  1.0633560913682442e-03
  1.0061334426670582e-03  9.5066719738062680e-04  8.9694615339891708e-04  8.4495967419103205e-04  7.9469756914101451e-04
  7.4614997311416476e-04  6.9930722525387743e-04  6.5415974700899359e-04  6.1069791939167260e-04  5.6891195946577632e-04
  5.2879179606577496e-04  4.9032694474616674e-04  4.5350638196141476e-04  4.1831841847640450e-04  3.8475057200741133e-04
  3.5278943909359086e-04  3.2242056619898523e-04  2.9362832004504221e-04  2.6639575717365770e-04  2.4070449274072914e-04
  2.1653456854023041e-04  1.9386432025880019e-04  1.7267024396084904e-04  1.5292686180418382e-04  1.3460658698614782e-04
  1.1767958792027763e-04  1.0211365164347914e-04  8.7874046453717303e-05  7.4923383778225793e-05  6.3221479272229728e-05
  5.2725213148192619e-05  4.3388389735569364e-05  3.5161596271087773e-05  2.7992060919536521e-05  2.1823510025078663e-05
  1.6596024593077295e-05  1.2245896002438403e-05  8.7054809484710247e-06  5.9030556162674424e-06  3.7626690845936766e-06
  2.2039959603049350e-06  1.1421882432702790e-06  4.8772642181981452e-07  1.4626979870564627e-07  1.8506047581856461e-08
  0.0000000000000000e+00
