# Supplementary material
Source: publisher figshare collection journal article supplement (https://rs.figshare.com/ndownloader/files/37464464)
Supplement: Supplementary file 2 [file 37464464 › Ordered_Nanoporous_Metals_SI/Xylenes_Ag_CRIst3_Diffusion/1a_ag_CRIst3_orthoxylene_jalkanen/0deposit/cri_st3_ag_foam.data]

lammps simulation

2084   atoms
5       atom types

0.0 38.2338 xlo xhi
0.0 38.2338 ylo yhi
0.0 38.2338 zlo zhi
0.0000 0.0000 0.0000 xy xz yz

Atoms

1 1 5 0.0 0.0000000 0.0000000 8.4963998 0 0 0
2 1 5 0.0 0.0000000 0.0000000 12.744600 0 0 0
3 1 5 0.0 0.0000000 0.0000000 16.992799 0 0 0
4 1 5 0.0 0.0000000 0.0000000 21.240999 0 0 0
5 1 5 0.0 0.0000000 0.0000000 25.489200 0 0 0
6 1 5 0.0 0.0000000 0.0000000 29.737400 0 0 0
7 1 5 0.0 0.0000000 4.2481999 8.4963998 0 0 0
8 1 5 0.0 0.0000000 4.2481999 12.744600 0 0 0
9 1 5 0.0 0.0000000 4.2481999 16.992799 0 0 0
10 1 5 0.0 0.0000000 4.2481999 21.240999 0 0 0
11 1 5 0.0 0.0000000 4.2481999 25.489200 0 0 0
12 1 5 0.0 0.0000000 4.2481999 29.737400 0 0 0
13 1 5 0.0 0.0000000 8.4963998 0.0000000 0 0 0
14 1 5 0.0 0.0000000 8.4963998 4.2481999 0 0 0
15 1 5 0.0 0.0000000 8.4963998 8.4963998 0 0 0
16 1 5 0.0 0.0000000 8.4963998 12.744600 0 0 0
17 1 5 0.0 0.0000000 8.4963998 16.992799 0 0 0
18 1 5 0.0 0.0000000 8.4963998 21.240999 0 0 0
19 1 5 0.0 0.0000000 8.4963998 25.489200 0 0 0
20 1 5 0.0 0.0000000 8.4963998 29.737400 0 0 0
21 1 5 0.0 0.0000000 8.4963998 33.985599 0 0 0
22 1 5 0.0 0.0000000 12.744600 0.0000000 0 0 0
23 1 5 0.0 0.0000000 12.744600 4.2481999 0 0 0
24 1 5 0.0 0.0000000 12.744600 8.4963998 0 0 0
25 1 5 0.0 0.0000000 12.744600 21.240999 0 0 0
26 1 5 0.0 0.0000000 12.744600 25.489200 0 0 0
27 1 5 0.0 0.0000000 12.744600 29.737400 0 0 0
28 1 5 0.0 0.0000000 12.744600 33.985599 0 0 0
29 1 5 0.0 0.0000000 16.992799 0.0000000 0 0 0
30 1 5 0.0 0.0000000 16.992799 4.2481999 0 0 0
31 1 5 0.0 0.0000000 16.992799 8.4963998 0 0 0
32 1 5 0.0 0.0000000 16.992799 29.737400 0 0 0
33 1 5 0.0 0.0000000 16.992799 33.985599 0 0 0
34 1 5 0.0 0.0000000 21.240999 0.0000000 0 0 0
35 1 5 0.0 0.0000000 21.240999 4.2481999 0 0 0
36 1 5 0.0 0.0000000 21.240999 8.4963998 0 0 0
37 1 5 0.0 0.0000000 21.240999 29.737400 0 0 0
38 1 5 0.0 0.0000000 21.240999 33.985599 0 0 0
39 1 5 0.0 0.0000000 25.489200 0.0000000 0 0 0
40 1 5 0.0 0.0000000 25.489200 4.2481999 0 0 0
41 1 5 0.0 0.0000000 25.489200 8.4963998 0 0 0
42 1 5 0.0 0.0000000 25.489200 12.744600 0 0 0
43 1 5 0.0 0.0000000 25.489200 25.489200 0 0 0
44 1 5 0.0 0.0000000 25.489200 29.737400 0 0 0
45 1 5 0.0 0.0000000 25.489200 33.985599 0 0 0
46 1 5 0.0 0.0000000 29.737400 4.2481999 0 0 0
47 1 5 0.0 0.0000000 29.737400 8.4963998 0 0 0
48 1 5 0.0 0.0000000 29.737400 12.744600 0 0 0
49 1 5 0.0 0.0000000 29.737400 16.992799 0 0 0
50 1 5 0.0 0.0000000 29.737400 21.240999 0 0 0
51 1 5 0.0 0.0000000 29.737400 25.489200 0 0 0
52 1 5 0.0 0.0000000 29.737400 29.737400 0 0 0
53 1 5 0.0 0.0000000 29.737400 33.985599 0 0 0
54 1 5 0.0 0.0000000 33.985599 8.4963998 0 0 0
55 1 5 0.0 0.0000000 33.985599 12.744600 0 0 0
56 1 5 0.0 0.0000000 33.985599 16.992799 0 0 0
57 1 5 0.0 0.0000000 33.985599 21.240999 0 0 0
58 1 5 0.0 0.0000000 33.985599 25.489200 0 0 0
59 1 5 0.0 0.0000000 33.985599 29.737400 0 0 0
60 1 5 0.0 4.2481999 0.0000000 8.4963998 0 0 0
61 1 5 0.0 4.2481999 0.0000000 12.744600 0 0 0
62 1 5 0.0 4.2481999 0.0000000 16.992799 0 0 0
63 1 5 0.0 4.2481999 0.0000000 21.240999 0 0 0
64 1 5 0.0 4.2481999 0.0000000 25.489200 0 0 0
65 1 5 0.0 4.2481999 0.0000000 29.737400 0 0 0
66 1 5 0.0 4.2481999 4.2481999 12.744600 0 0 0
67 1 5 0.0 4.2481999 4.2481999 16.992799 0 0 0
68 1 5 0.0 4.2481999 4.2481999 21.240999 0 0 0
69 1 5 0.0 4.2481999 4.2481999 25.489200 0 0 0
70 1 5 0.0 4.2481999 4.2481999 29.737400 0 0 0
71 1 5 0.0 4.2481999 4.2481999 33.985599 0 0 0
72 1 5 0.0 4.2481999 8.4963998 0.0000000 0 0 0
73 1 5 0.0 4.2481999 8.4963998 4.2481999 0 0 0
74 1 5 0.0 4.2481999 8.4963998 16.992799 0 0 0
75 1 5 0.0 4.2481999 8.4963998 21.240999 0 0 0
76 1 5 0.0 4.2481999 8.4963998 25.489200 0 0 0
77 1 5 0.0 4.2481999 8.4963998 29.737400 0 0 0
78 1 5 0.0 4.2481999 8.4963998 33.985599 0 0 0
79 1 5 0.0 4.2481999 12.744600 0.0000000 0 0 0
80 1 5 0.0 4.2481999 12.744600 4.2481999 0 0 0
81 1 5 0.0 4.2481999 12.744600 21.240999 0 0 0
82 1 5 0.0 4.2481999 12.744600 25.489200 0 0 0
83 1 5 0.0 4.2481999 12.744600 29.737400 0 0 0
84 1 5 0.0 4.2481999 12.744600 33.985599 0 0 0
85 1 5 0.0 4.2481999 16.992799 0.0000000 0 0 0
86 1 5 0.0 4.2481999 16.992799 4.2481999 0 0 0
87 1 5 0.0 4.2481999 16.992799 8.4963998 0 0 0
88 1 5 0.0 4.2481999 16.992799 25.489200 0 0 0
89 1 5 0.0 4.2481999 16.992799 29.737400 0 0 0
90 1 5 0.0 4.2481999 16.992799 33.985599 0 0 0
91 1 5 0.0 4.2481999 21.240999 0.0000000 0 0 0
92 1 5 0.0 4.2481999 21.240999 4.2481999 0 0 0
93 1 5 0.0 4.2481999 21.240999 8.4963998 0 0 0
94 1 5 0.0 4.2481999 21.240999 12.744600 0 0 0
95 1 5 0.0 4.2481999 21.240999 29.737400 0 0 0
96 1 5 0.0 4.2481999 21.240999 33.985599 0 0 0
97 1 5 0.0 4.2481999 25.489200 0.0000000 0 0 0
98 1 5 0.0 4.2481999 25.489200 4.2481999 0 0 0
99 1 5 0.0 4.2481999 25.489200 8.4963998 0 0 0
100 1 5 0.0 4.2481999 25.489200 12.744600 0 0 0
101 1 5 0.0 4.2481999 25.489200 16.992799 0 0 0
102 1 5 0.0 4.2481999 25.489200 33.985599 0 0 0
103 1 5 0.0 4.2481999 29.737400 0.0000000 0 0 0
104 1 5 0.0 4.2481999 29.737400 4.2481999 0 0 0
105 1 5 0.0 4.2481999 29.737400 8.4963998 0 0 0
106 1 5 0.0 4.2481999 29.737400 12.744600 0 0 0
107 1 5 0.0 4.2481999 29.737400 16.992799 0 0 0
108 1 5 0.0 4.2481999 29.737400 21.240999 0 0 0
109 1 5 0.0 4.2481999 29.737400 25.489200 0 0 0
110 1 5 0.0 4.2481999 33.985599 4.2481999 0 0 0
111 1 5 0.0 4.2481999 33.985599 8.4963998 0 0 0
112 1 5 0.0 4.2481999 33.985599 12.744600 0 0 0
113 1 5 0.0 4.2481999 33.985599 16.992799 0 0 0
114 1 5 0.0 4.2481999 33.985599 21.240999 0 0 0
115 1 5 0.0 4.2481999 33.985599 25.489200 0 0 0
116 1 5 0.0 4.2481999 33.985599 29.737400 0 0 0
117 1 5 0.0 8.4963998 0.0000000 0.0000000 0 0 0
118 1 5 0.0 8.4963998 0.0000000 4.2481999 0 0 0
119 1 5 0.0 8.4963998 0.0000000 8.4963998 0 0 0
120 1 5 0.0 8.4963998 0.0000000 12.744600 0 0 0
121 1 5 0.0 8.4963998 0.0000000 16.992799 0 0 0
122 1 5 0.0 8.4963998 0.0000000 21.240999 0 0 0
123 1 5 0.0 8.4963998 0.0000000 25.489200 0 0 0
124 1 5 0.0 8.4963998 0.0000000 29.737400 0 0 0
125 1 5 0.0 8.4963998 0.0000000 33.985599 0 0 0
126 1 5 0.0 8.4963998 4.2481999 0.0000000 0 0 0
127 1 5 0.0 8.4963998 4.2481999 16.992799 0 0 0
128 1 5 0.0 8.4963998 4.2481999 21.240999 0 0 0
129 1 5 0.0 8.4963998 4.2481999 25.489200 0 0 0
130 1 5 0.0 8.4963998 4.2481999 29.737400 0 0 0
131 1 5 0.0 8.4963998 4.2481999 33.985599 0 0 0
132 1 5 0.0 8.4963998 8.4963998 0.0000000 0 0 0
133 1 5 0.0 8.4963998 8.4963998 21.240999 0 0 0
134 1 5 0.0 8.4963998 8.4963998 25.489200 0 0 0
135 1 5 0.0 8.4963998 8.4963998 29.737400 0 0 0
136 1 5 0.0 8.4963998 8.4963998 33.985599 0 0 0
137 1 5 0.0 8.4963998 12.744600 0.0000000 0 0 0
138 1 5 0.0 8.4963998 12.744600 16.992799 0 0 0
139 1 5 0.0 8.4963998 12.744600 21.240999 0 0 0
140 1 5 0.0 8.4963998 12.744600 25.489200 0 0 0
141 1 5 0.0 8.4963998 12.744600 29.737400 0 0 0
142 1 5 0.0 8.4963998 12.744600 33.985599 0 0 0
143 1 5 0.0 8.4963998 16.992799 0.0000000 0 0 0
144 1 5 0.0 8.4963998 16.992799 4.2481999 0 0 0
145 1 5 0.0 8.4963998 16.992799 12.744600 0 0 0
146 1 5 0.0 8.4963998 16.992799 16.992799 0 0 0
147 1 5 0.0 8.4963998 16.992799 21.240999 0 0 0
148 1 5 0.0 8.4963998 16.992799 25.489200 0 0 0
149 1 5 0.0 8.4963998 16.992799 29.737400 0 0 0
150 1 5 0.0 8.4963998 16.992799 33.985599 0 0 0
151 1 5 0.0 8.4963998 21.240999 0.0000000 0 0 0
152 1 5 0.0 8.4963998 21.240999 4.2481999 0 0 0
153 1 5 0.0 8.4963998 21.240999 8.4963998 0 0 0
154 1 5 0.0 8.4963998 21.240999 12.744600 0 0 0
155 1 5 0.0 8.4963998 21.240999 16.992799 0 0 0
156 1 5 0.0 8.4963998 21.240999 29.737400 0 0 0
157 1 5 0.0 8.4963998 21.240999 33.985599 0 0 0
158 1 5 0.0 8.4963998 25.489200 0.0000000 0 0 0
159 1 5 0.0 8.4963998 25.489200 4.2481999 0 0 0
160 1 5 0.0 8.4963998 25.489200 8.4963998 0 0 0
161 1 5 0.0 8.4963998 25.489200 12.744600 0 0 0
162 1 5 0.0 8.4963998 25.489200 16.992799 0 0 0
163 1 5 0.0 8.4963998 29.737400 0.0000000 0 0 0
164 1 5 0.0 8.4963998 29.737400 4.2481999 0 0 0
165 1 5 0.0 8.4963998 29.737400 8.4963998 0 0 0
166 1 5 0.0 8.4963998 29.737400 12.744600 0 0 0
167 1 5 0.0 8.4963998 29.737400 16.992799 0 0 0
168 1 5 0.0 8.4963998 33.985599 0.0000000 0 0 0
169 1 5 0.0 8.4963998 33.985599 4.2481999 0 0 0
170 1 5 0.0 8.4963998 33.985599 8.4963998 0 0 0
171 1 5 0.0 8.4963998 33.985599 12.744600 0 0 0
172 1 5 0.0 8.4963998 33.985599 16.992799 0 0 0
173 1 5 0.0 8.4963998 33.985599 21.240999 0 0 0
174 1 5 0.0 12.744600 0.0000000 0.0000000 0 0 0
175 1 5 0.0 12.744600 0.0000000 4.2481999 0 0 0
176 1 5 0.0 12.744600 0.0000000 8.4963998 0 0 0
177 1 5 0.0 12.744600 0.0000000 12.744600 0 0 0
178 1 5 0.0 12.744600 0.0000000 16.992799 0 0 0
179 1 5 0.0 12.744600 0.0000000 29.737400 0 0 0
180 1 5 0.0 12.744600 0.0000000 33.985599 0 0 0
181 1 5 0.0 12.744600 4.2481999 0.0000000 0 0 0
182 1 5 0.0 12.744600 4.2481999 4.2481999 0 0 0
183 1 5 0.0 12.744600 4.2481999 8.4963998 0 0 0
184 1 5 0.0 12.744600 4.2481999 25.489200 0 0 0
185 1 5 0.0 12.744600 4.2481999 29.737400 0 0 0
186 1 5 0.0 12.744600 4.2481999 33.985599 0 0 0
187 1 5 0.0 12.744600 8.4963998 0.0000000 0 0 0
188 1 5 0.0 12.744600 8.4963998 4.2481999 0 0 0
189 1 5 0.0 12.744600 8.4963998 21.240999 0 0 0
190 1 5 0.0 12.744600 8.4963998 25.489200 0 0 0
191 1 5 0.0 12.744600 8.4963998 29.737400 0 0 0
192 1 5 0.0 12.744600 8.4963998 33.985599 0 0 0
193 1 5 0.0 12.744600 12.744600 0.0000000 0 0 0
194 1 5 0.0 12.744600 12.744600 16.992799 0 0 0
195 1 5 0.0 12.744600 12.744600 21.240999 0 0 0
196 1 5 0.0 12.744600 12.744600 25.489200 0 0 0
197 1 5 0.0 12.744600 12.744600 29.737400 0 0 0
198 1 5 0.0 12.744600 12.744600 33.985599 0 0 0
199 1 5 0.0 12.744600 16.992799 8.4963998 0 0 0
200 1 5 0.0 12.744600 16.992799 12.744600 0 0 0
201 1 5 0.0 12.744600 16.992799 16.992799 0 0 0
202 1 5 0.0 12.744600 16.992799 21.240999 0 0 0
203 1 5 0.0 12.744600 16.992799 25.489200 0 0 0
204 1 5 0.0 12.744600 16.992799 29.737400 0 0 0
205 1 5 0.0 12.744600 16.992799 33.985599 0 0 0
206 1 5 0.0 12.744600 21.240999 4.2481999 0 0 0
207 1 5 0.0 12.744600 21.240999 8.4963998 0 0 0
208 1 5 0.0 12.744600 21.240999 12.744600 0 0 0
209 1 5 0.0 12.744600 21.240999 16.992799 0 0 0
210 1 5 0.0 12.744600 21.240999 21.240999 0 0 0
211 1 5 0.0 12.744600 21.240999 25.489200 0 0 0
212 1 5 0.0 12.744600 25.489200 0.0000000 0 0 0
213 1 5 0.0 12.744600 25.489200 4.2481999 0 0 0
214 1 5 0.0 12.744600 25.489200 8.4963998 0 0 0
215 1 5 0.0 12.744600 25.489200 12.744600 0 0 0
216 1 5 0.0 12.744600 25.489200 16.992799 0 0 0
217 1 5 0.0 12.744600 25.489200 21.240999 0 0 0
218 1 5 0.0 12.744600 29.737400 0.0000000 0 0 0
219 1 5 0.0 12.744600 29.737400 4.2481999 0 0 0
220 1 5 0.0 12.744600 29.737400 8.4963998 0 0 0
221 1 5 0.0 12.744600 29.737400 12.744600 0 0 0
222 1 5 0.0 12.744600 29.737400 16.992799 0 0 0
223 1 5 0.0 12.744600 29.737400 21.240999 0 0 0
224 1 5 0.0 12.744600 33.985599 0.0000000 0 0 0
225 1 5 0.0 12.744600 33.985599 4.2481999 0 0 0
226 1 5 0.0 12.744600 33.985599 8.4963998 0 0 0
227 1 5 0.0 12.744600 33.985599 12.744600 0 0 0
228 1 5 0.0 12.744600 33.985599 16.992799 0 0 0
229 1 5 0.0 12.744600 33.985599 21.240999 0 0 0
230 1 5 0.0 12.744600 33.985599 33.985599 0 0 0
231 1 5 0.0 16.992799 0.0000000 0.0000000 0 0 0
232 1 5 0.0 16.992799 0.0000000 4.2481999 0 0 0
233 1 5 0.0 16.992799 0.0000000 8.4963998 0 0 0
234 1 5 0.0 16.992799 0.0000000 29.737400 0 0 0
235 1 5 0.0 16.992799 0.0000000 33.985599 0 0 0
236 1 5 0.0 16.992799 4.2481999 0.0000000 0 0 0
237 1 5 0.0 16.992799 4.2481999 4.2481999 0 0 0
238 1 5 0.0 16.992799 4.2481999 8.4963998 0 0 0
239 1 5 0.0 16.992799 4.2481999 25.489200 0 0 0
240 1 5 0.0 16.992799 4.2481999 29.737400 0 0 0
241 1 5 0.0 16.992799 4.2481999 33.985599 0 0 0
242 1 5 0.0 16.992799 8.4963998 0.0000000 0 0 0
243 1 5 0.0 16.992799 8.4963998 4.2481999 0 0 0
244 1 5 0.0 16.992799 8.4963998 8.4963998 0 0 0
245 1 5 0.0 16.992799 8.4963998 21.240999 0 0 0
246 1 5 0.0 16.992799 8.4963998 25.489200 0 0 0
247 1 5 0.0 16.992799 8.4963998 29.737400 0 0 0
248 1 5 0.0 16.992799 8.4963998 33.985599 0 0 0
249 1 5 0.0 16.992799 12.744600 8.4963998 0 0 0
250 1 5 0.0 16.992799 12.744600 12.744600 0 0 0
251 1 5 0.0 16.992799 12.744600 16.992799 0 0 0
252 1 5 0.0 16.992799 12.744600 21.240999 0 0 0
253 1 5 0.0 16.992799 12.744600 25.489200 0 0 0
254 1 5 0.0 16.992799 12.744600 29.737400 0 0 0
255 1 5 0.0 16.992799 12.744600 33.985599 0 0 0
256 1 5 0.0 16.992799 16.992799 8.4963998 0 0 0
257 1 5 0.0 16.992799 16.992799 12.744600 0 0 0
258 1 5 0.0 16.992799 16.992799 16.992799 0 0 0
259 1 5 0.0 16.992799 16.992799 21.240999 0 0 0
260 1 5 0.0 16.992799 16.992799 25.489200 0 0 0
261 1 5 0.0 16.992799 16.992799 29.737400 0 0 0
262 1 5 0.0 16.992799 21.240999 8.4963998 0 0 0
263 1 5 0.0 16.992799 21.240999 12.744600 0 0 0
264 1 5 0.0 16.992799 21.240999 16.992799 0 0 0
265 1 5 0.0 16.992799 21.240999 21.240999 0 0 0
266 1 5 0.0 16.992799 21.240999 25.489200 0 0 0
267 1 5 0.0 16.992799 21.240999 29.737400 0 0 0
268 1 5 0.0 16.992799 25.489200 0.0000000 0 0 0
269 1 5 0.0 16.992799 25.489200 4.2481999 0 0 0
270 1 5 0.0 16.992799 25.489200 8.4963998 0 0 0
271 1 5 0.0 16.992799 25.489200 12.744600 0 0 0
272 1 5 0.0 16.992799 25.489200 16.992799 0 0 0
273 1 5 0.0 16.992799 25.489200 21.240999 0 0 0
274 1 5 0.0 16.992799 25.489200 25.489200 0 0 0
275 1 5 0.0 16.992799 29.737400 0.0000000 0 0 0
276 1 5 0.0 16.992799 29.737400 4.2481999 0 0 0
277 1 5 0.0 16.992799 29.737400 8.4963998 0 0 0
278 1 5 0.0 16.992799 29.737400 12.744600 0 0 0
279 1 5 0.0 16.992799 29.737400 16.992799 0 0 0
280 1 5 0.0 16.992799 29.737400 21.240999 0 0 0
281 1 5 0.0 16.992799 29.737400 25.489200 0 0 0
282 1 5 0.0 16.992799 29.737400 33.985599 0 0 0
283 1 5 0.0 16.992799 33.985599 0.0000000 0 0 0
284 1 5 0.0 16.992799 33.985599 4.2481999 0 0 0
285 1 5 0.0 16.992799 33.985599 8.4963998 0 0 0
286 1 5 0.0 16.992799 33.985599 12.744600 0 0 0
287 1 5 0.0 16.992799 33.985599 29.737400 0 0 0
288 1 5 0.0 16.992799 33.985599 33.985599 0 0 0
289 1 5 0.0 21.240999 0.0000000 0.0000000 0 0 0
290 1 5 0.0 21.240999 0.0000000 4.2481999 0 0 0
291 1 5 0.0 21.240999 0.0000000 8.4963998 0 0 0
292 1 5 0.0 21.240999 0.0000000 29.737400 0 0 0
293 1 5 0.0 21.240999 0.0000000 33.985599 0 0 0
294 1 5 0.0 21.240999 4.2481999 0.0000000 0 0 0
295 1 5 0.0 21.240999 4.2481999 4.2481999 0 0 0
296 1 5 0.0 21.240999 4.2481999 8.4963998 0 0 0
297 1 5 0.0 21.240999 4.2481999 12.744600 0 0 0
298 1 5 0.0 21.240999 4.2481999 29.737400 0 0 0
299 1 5 0.0 21.240999 4.2481999 33.985599 0 0 0
300 1 5 0.0 21.240999 8.4963998 0.0000000 0 0 0
301 1 5 0.0 21.240999 8.4963998 4.2481999 0 0 0
302 1 5 0.0 21.240999 8.4963998 8.4963998 0 0 0
303 1 5 0.0 21.240999 8.4963998 12.744600 0 0 0
304 1 5 0.0 21.240999 8.4963998 16.992799 0 0 0
305 1 5 0.0 21.240999 8.4963998 21.240999 0 0 0
306 1 5 0.0 21.240999 8.4963998 25.489200 0 0 0
307 1 5 0.0 21.240999 8.4963998 29.737400 0 0 0
308 1 5 0.0 21.240999 8.4963998 33.985599 0 0 0
309 1 5 0.0 21.240999 12.744600 4.2481999 0 0 0
310 1 5 0.0 21.240999 12.744600 8.4963998 0 0 0
311 1 5 0.0 21.240999 12.744600 12.744600 0 0 0
312 1 5 0.0 21.240999 12.744600 16.992799 0 0 0
313 1 5 0.0 21.240999 12.744600 21.240999 0 0 0
314 1 5 0.0 21.240999 12.744600 25.489200 0 0 0
315 1 5 0.0 21.240999 12.744600 29.737400 0 0 0
316 1 5 0.0 21.240999 16.992799 8.4963998 0 0 0
317 1 5 0.0 21.240999 16.992799 12.744600 0 0 0
318 1 5 0.0 21.240999 16.992799 16.992799 0 0 0
319 1 5 0.0 21.240999 16.992799 21.240999 0 0 0
320 1 5 0.0 21.240999 16.992799 25.489200 0 0 0
321 1 5 0.0 21.240999 16.992799 29.737400 0 0 0
322 1 5 0.0 21.240999 21.240999 12.744600 0 0 0
323 1 5 0.0 21.240999 21.240999 16.992799 0 0 0
324 1 5 0.0 21.240999 21.240999 21.240999 0 0 0
325 1 5 0.0 21.240999 21.240999 25.489200 0 0 0
326 1 5 0.0 21.240999 21.240999 29.737400 0 0 0
327 1 5 0.0 21.240999 25.489200 12.744600 0 0 0
328 1 5 0.0 21.240999 25.489200 16.992799 0 0 0
329 1 5 0.0 21.240999 25.489200 21.240999 0 0 0
330 1 5 0.0 21.240999 25.489200 25.489200 0 0 0
331 1 5 0.0 21.240999 25.489200 29.737400 0 0 0
332 1 5 0.0 21.240999 25.489200 33.985599 0 0 0
333 1 5 0.0 21.240999 29.737400 0.0000000 0 0 0
334 1 5 0.0 21.240999 29.737400 4.2481999 0 0 0
335 1 5 0.0 21.240999 29.737400 16.992799 0 0 0
336 1 5 0.0 21.240999 29.737400 21.240999 0 0 0
337 1 5 0.0 21.240999 29.737400 25.489200 0 0 0
338 1 5 0.0 21.240999 29.737400 29.737400 0 0 0
339 1 5 0.0 21.240999 29.737400 33.985599 0 0 0
340 1 5 0.0 21.240999 33.985599 0.0000000 0 0 0
341 1 5 0.0 21.240999 33.985599 4.2481999 0 0 0
342 1 5 0.0 21.240999 33.985599 8.4963998 0 0 0
343 1 5 0.0 21.240999 33.985599 21.240999 0 0 0
344 1 5 0.0 21.240999 33.985599 25.489200 0 0 0
345 1 5 0.0 21.240999 33.985599 29.737400 0 0 0
346 1 5 0.0 21.240999 33.985599 33.985599 0 0 0
347 1 5 0.0 25.489200 0.0000000 0.0000000 0 0 0
348 1 5 0.0 25.489200 0.0000000 4.2481999 0 0 0
349 1 5 0.0 25.489200 0.0000000 8.4963998 0 0 0
350 1 5 0.0 25.489200 0.0000000 12.744600 0 0 0
351 1 5 0.0 25.489200 0.0000000 25.489200 0 0 0
352 1 5 0.0 25.489200 0.0000000 29.737400 0 0 0
353 1 5 0.0 25.489200 0.0000000 33.985599 0 0 0
354 1 5 0.0 25.489200 4.2481999 0.0000000 0 0 0
355 1 5 0.0 25.489200 4.2481999 4.2481999 0 0 0
356 1 5 0.0 25.489200 4.2481999 8.4963998 0 0 0
357 1 5 0.0 25.489200 4.2481999 12.744600 0 0 0
358 1 5 0.0 25.489200 4.2481999 16.992799 0 0 0
359 1 5 0.0 25.489200 4.2481999 29.737400 0 0 0
360 1 5 0.0 25.489200 4.2481999 33.985599 0 0 0
361 1 5 0.0 25.489200 8.4963998 0.0000000 0 0 0
362 1 5 0.0 25.489200 8.4963998 4.2481999 0 0 0
363 1 5 0.0 25.489200 8.4963998 8.4963998 0 0 0
364 1 5 0.0 25.489200 8.4963998 12.744600 0 0 0
365 1 5 0.0 25.489200 8.4963998 16.992799 0 0 0
366 1 5 0.0 25.489200 12.744600 4.2481999 0 0 0
367 1 5 0.0 25.489200 12.744600 8.4963998 0 0 0
368 1 5 0.0 25.489200 12.744600 12.744600 0 0 0
369 1 5 0.0 25.489200 12.744600 16.992799 0 0 0
370 1 5 0.0 25.489200 12.744600 21.240999 0 0 0
371 1 5 0.0 25.489200 12.744600 25.489200 0 0 0
372 1 5 0.0 25.489200 16.992799 8.4963998 0 0 0
373 1 5 0.0 25.489200 16.992799 12.744600 0 0 0
374 1 5 0.0 25.489200 16.992799 16.992799 0 0 0
375 1 5 0.0 25.489200 16.992799 21.240999 0 0 0
376 1 5 0.0 25.489200 16.992799 25.489200 0 0 0
377 1 5 0.0 25.489200 16.992799 29.737400 0 0 0
378 1 5 0.0 25.489200 16.992799 33.985599 0 0 0
379 1 5 0.0 25.489200 21.240999 0.0000000 0 0 0
380 1 5 0.0 25.489200 21.240999 12.744600 0 0 0
381 1 5 0.0 25.489200 21.240999 16.992799 0 0 0
382 1 5 0.0 25.489200 21.240999 21.240999 0 0 0
383 1 5 0.0 25.489200 21.240999 25.489200 0 0 0
384 1 5 0.0 25.489200 21.240999 29.737400 0 0 0
385 1 5 0.0 25.489200 21.240999 33.985599 0 0 0
386 1 5 0.0 25.489200 25.489200 0.0000000 0 0 0
387 1 5 0.0 25.489200 25.489200 16.992799 0 0 0
388 1 5 0.0 25.489200 25.489200 21.240999 0 0 0
389 1 5 0.0 25.489200 25.489200 25.489200 0 0 0
390 1 5 0.0 25.489200 25.489200 29.737400 0 0 0
391 1 5 0.0 25.489200 25.489200 33.985599 0 0 0
392 1 5 0.0 25.489200 29.737400 0.0000000 0 0 0
393 1 5 0.0 25.489200 29.737400 16.992799 0 0 0
394 1 5 0.0 25.489200 29.737400 21.240999 0 0 0
395 1 5 0.0 25.489200 29.737400 25.489200 0 0 0
396 1 5 0.0 25.489200 29.737400 29.737400 0 0 0
397 1 5 0.0 25.489200 29.737400 33.985599 0 0 0
398 1 5 0.0 25.489200 33.985599 0.0000000 0 0 0
399 1 5 0.0 25.489200 33.985599 4.2481999 0 0 0
400 1 5 0.0 25.489200 33.985599 16.992799 0 0 0
401 1 5 0.0 25.489200 33.985599 21.240999 0 0 0
402 1 5 0.0 25.489200 33.985599 25.489200 0 0 0
403 1 5 0.0 25.489200 33.985599 29.737400 0 0 0
404 1 5 0.0 25.489200 33.985599 33.985599 0 0 0
405 1 5 0.0 29.737400 0.0000000 0.0000000 0 0 0
406 1 5 0.0 29.737400 0.0000000 4.2481999 0 0 0
407 1 5 0.0 29.737400 0.0000000 8.4963998 0 0 0
408 1 5 0.0 29.737400 0.0000000 12.744600 0 0 0
409 1 5 0.0 29.737400 0.0000000 16.992799 0 0 0
410 1 5 0.0 29.737400 0.0000000 21.240999 0 0 0
411 1 5 0.0 29.737400 0.0000000 25.489200 0 0 0
412 1 5 0.0 29.737400 0.0000000 29.737400 0 0 0
413 1 5 0.0 29.737400 0.0000000 33.985599 0 0 0
414 1 5 0.0 29.737400 4.2481999 0.0000000 0 0 0
415 1 5 0.0 29.737400 4.2481999 4.2481999 0 0 0
416 1 5 0.0 29.737400 4.2481999 8.4963998 0 0 0
417 1 5 0.0 29.737400 4.2481999 12.744600 0 0 0
418 1 5 0.0 29.737400 4.2481999 16.992799 0 0 0
419 1 5 0.0 29.737400 4.2481999 21.240999 0 0 0
420 1 5 0.0 29.737400 4.2481999 33.985599 0 0 0
421 1 5 0.0 29.737400 8.4963998 0.0000000 0 0 0
422 1 5 0.0 29.737400 8.4963998 4.2481999 0 0 0
423 1 5 0.0 29.737400 8.4963998 8.4963998 0 0 0
424 1 5 0.0 29.737400 8.4963998 12.744600 0 0 0
425 1 5 0.0 29.737400 8.4963998 16.992799 0 0 0
426 1 5 0.0 29.737400 12.744600 0.0000000 0 0 0
427 1 5 0.0 29.737400 12.744600 4.2481999 0 0 0
428 1 5 0.0 29.737400 12.744600 8.4963998 0 0 0
429 1 5 0.0 29.737400 12.744600 12.744600 0 0 0
430 1 5 0.0 29.737400 12.744600 16.992799 0 0 0
431 1 5 0.0 29.737400 12.744600 21.240999 0 0 0
432 1 5 0.0 29.737400 16.992799 0.0000000 0 0 0
433 1 5 0.0 29.737400 16.992799 4.2481999 0 0 0
434 1 5 0.0 29.737400 16.992799 8.4963998 0 0 0
435 1 5 0.0 29.737400 16.992799 12.744600 0 0 0
436 1 5 0.0 29.737400 16.992799 16.992799 0 0 0
437 1 5 0.0 29.737400 16.992799 21.240999 0 0 0
438 1 5 0.0 29.737400 16.992799 33.985599 0 0 0
439 1 5 0.0 29.737400 21.240999 0.0000000 0 0 0
440 1 5 0.0 29.737400 21.240999 4.2481999 0 0 0
441 1 5 0.0 29.737400 21.240999 8.4963998 0 0 0
442 1 5 0.0 29.737400 21.240999 12.744600 0 0 0
443 1 5 0.0 29.737400 21.240999 16.992799 0 0 0
444 1 5 0.0 29.737400 21.240999 21.240999 0 0 0
445 1 5 0.0 29.737400 21.240999 25.489200 0 0 0
446 1 5 0.0 29.737400 21.240999 29.737400 0 0 0
447 1 5 0.0 29.737400 21.240999 33.985599 0 0 0
448 1 5 0.0 29.737400 25.489200 0.0000000 0 0 0
449 1 5 0.0 29.737400 25.489200 21.240999 0 0 0
450 1 5 0.0 29.737400 25.489200 25.489200 0 0 0
451 1 5 0.0 29.737400 25.489200 29.737400 0 0 0
452 1 5 0.0 29.737400 25.489200 33.985599 0 0 0
453 1 5 0.0 29.737400 29.737400 0.0000000 0 0 0
454 1 5 0.0 29.737400 29.737400 21.240999 0 0 0
455 1 5 0.0 29.737400 29.737400 25.489200 0 0 0
456 1 5 0.0 29.737400 29.737400 29.737400 0 0 0
457 1 5 0.0 29.737400 29.737400 33.985599 0 0 0
458 1 5 0.0 29.737400 33.985599 0.0000000 0 0 0
459 1 5 0.0 29.737400 33.985599 12.744600 0 0 0
460 1 5 0.0 29.737400 33.985599 16.992799 0 0 0
461 1 5 0.0 29.737400 33.985599 21.240999 0 0 0
462 1 5 0.0 29.737400 33.985599 25.489200 0 0 0
463 1 5 0.0 29.737400 33.985599 29.737400 0 0 0
464 1 5 0.0 29.737400 33.985599 33.985599 0 0 0
465 1 5 0.0 33.985599 0.0000000 8.4963998 0 0 0
466 1 5 0.0 33.985599 0.0000000 12.744600 0 0 0
467 1 5 0.0 33.985599 0.0000000 16.992799 0 0 0
468 1 5 0.0 33.985599 0.0000000 21.240999 0 0 0
469 1 5 0.0 33.985599 0.0000000 25.489200 0 0 0
470 1 5 0.0 33.985599 0.0000000 29.737400 0 0 0
471 1 5 0.0 33.985599 4.2481999 4.2481999 0 0 0
472 1 5 0.0 33.985599 4.2481999 8.4963998 0 0 0
473 1 5 0.0 33.985599 4.2481999 12.744600 0 0 0
474 1 5 0.0 33.985599 4.2481999 16.992799 0 0 0
475 1 5 0.0 33.985599 4.2481999 21.240999 0 0 0
476 1 5 0.0 33.985599 4.2481999 25.489200 0 0 0
477 1 5 0.0 33.985599 8.4963998 0.0000000 0 0 0
478 1 5 0.0 33.985599 8.4963998 4.2481999 0 0 0
479 1 5 0.0 33.985599 8.4963998 8.4963998 0 0 0
480 1 5 0.0 33.985599 8.4963998 12.744600 0 0 0
481 1 5 0.0 33.985599 8.4963998 16.992799 0 0 0
482 1 5 0.0 33.985599 8.4963998 21.240999 0 0 0
483 1 5 0.0 33.985599 12.744600 0.0000000 0 0 0
484 1 5 0.0 33.985599 12.744600 4.2481999 0 0 0
485 1 5 0.0 33.985599 12.744600 8.4963998 0 0 0
486 1 5 0.0 33.985599 12.744600 12.744600 0 0 0
487 1 5 0.0 33.985599 12.744600 16.992799 0 0 0
488 1 5 0.0 33.985599 12.744600 33.985599 0 0 0
489 1 5 0.0 33.985599 16.992799 0.0000000 0 0 0
490 1 5 0.0 33.985599 16.992799 4.2481999 0 0 0
491 1 5 0.0 33.985599 16.992799 8.4963998 0 0 0
492 1 5 0.0 33.985599 16.992799 12.744600 0 0 0
493 1 5 0.0 33.985599 16.992799 29.737400 0 0 0
494 1 5 0.0 33.985599 16.992799 33.985599 0 0 0
495 1 5 0.0 33.985599 21.240999 0.0000000 0 0 0
496 1 5 0.0 33.985599 21.240999 4.2481999 0 0 0
497 1 5 0.0 33.985599 21.240999 8.4963998 0 0 0
498 1 5 0.0 33.985599 21.240999 25.489200 0 0 0
499 1 5 0.0 33.985599 21.240999 29.737400 0 0 0
500 1 5 0.0 33.985599 21.240999 33.985599 0 0 0
501 1 5 0.0 33.985599 25.489200 0.0000000 0 0 0
502 1 5 0.0 33.985599 25.489200 4.2481999 0 0 0
503 1 5 0.0 33.985599 25.489200 8.4963998 0 0 0
504 1 5 0.0 33.985599 25.489200 21.240999 0 0 0
505 1 5 0.0 33.985599 25.489200 25.489200 0 0 0
506 1 5 0.0 33.985599 25.489200 29.737400 0 0 0
507 1 5 0.0 33.985599 25.489200 33.985599 0 0 0
508 1 5 0.0 33.985599 29.737400 0.0000000 0 0 0
509 1 5 0.0 33.985599 29.737400 4.2481999 0 0 0
510 1 5 0.0 33.985599 29.737400 16.992799 0 0 0
511 1 5 0.0 33.985599 29.737400 21.240999 0 0 0
512 1 5 0.0 33.985599 29.737400 25.489200 0 0 0
513 1 5 0.0 33.985599 29.737400 29.737400 0 0 0
514 1 5 0.0 33.985599 29.737400 33.985599 0 0 0
515 1 5 0.0 33.985599 33.985599 8.4963998 0 0 0
516 1 5 0.0 33.985599 33.985599 12.744600 0 0 0
517 1 5 0.0 33.985599 33.985599 16.992799 0 0 0
518 1 5 0.0 33.985599 33.985599 21.240999 0 0 0
519 1 5 0.0 33.985599 33.985599 25.489200 0 0 0
520 1 5 0.0 33.985599 33.985599 29.737400 0 0 0
521 1 5 0.0 33.985599 33.985599 33.985599 0 0 0
522 1 5 0.0 0.0000000 2.1240999 10.620499 0 0 0
523 1 5 0.0 0.0000000 2.1240999 14.868700 0 0 0
524 1 5 0.0 0.0000000 2.1240999 19.116899 0 0 0
525 1 5 0.0 0.0000000 2.1240999 23.365100 0 0 0
526 1 5 0.0 0.0000000 2.1240999 27.613300 0 0 0
527 1 5 0.0 0.0000000 6.3723001 2.1240999 0 0 0
528 1 5 0.0 0.0000000 6.3723001 6.3723001 0 0 0
529 1 5 0.0 0.0000000 6.3723001 10.620499 0 0 0
530 1 5 0.0 0.0000000 6.3723001 14.868700 0 0 0
531 1 5 0.0 0.0000000 6.3723001 19.116899 0 0 0
532 1 5 0.0 0.0000000 6.3723001 23.365100 0 0 0
533 1 5 0.0 0.0000000 6.3723001 27.613300 0 0 0
534 1 5 0.0 0.0000000 10.620499 2.1240999 0 0 0
535 1 5 0.0 0.0000000 10.620499 6.3723001 0 0 0
536 1 5 0.0 0.0000000 10.620499 10.620499 0 0 0
537 1 5 0.0 0.0000000 10.620499 14.868700 0 0 0
538 1 5 0.0 0.0000000 10.620499 19.116899 0 0 0
539 1 5 0.0 0.0000000 10.620499 23.365100 0 0 0
540 1 5 0.0 0.0000000 10.620499 27.613300 0 0 0
541 1 5 0.0 0.0000000 10.620499 31.861499 0 0 0
542 1 5 0.0 0.0000000 10.620499 36.109699 0 0 0
543 1 5 0.0 0.0000000 14.868700 2.1240999 0 0 0
544 1 5 0.0 0.0000000 14.868700 6.3723001 0 0 0
545 1 5 0.0 0.0000000 14.868700 10.620499 0 0 0
546 1 5 0.0 0.0000000 14.868700 27.613300 0 0 0
547 1 5 0.0 0.0000000 14.868700 31.861499 0 0 0
548 1 5 0.0 0.0000000 14.868700 36.109699 0 0 0
549 1 5 0.0 0.0000000 19.116899 2.1240999 0 0 0
550 1 5 0.0 0.0000000 19.116899 6.3723001 0 0 0
551 1 5 0.0 0.0000000 19.116899 10.620499 0 0 0
552 1 5 0.0 0.0000000 19.116899 27.613300 0 0 0
553 1 5 0.0 0.0000000 19.116899 31.861499 0 0 0
554 1 5 0.0 0.0000000 19.116899 36.109699 0 0 0
555 1 5 0.0 0.0000000 23.365100 2.1240999 0 0 0
556 1 5 0.0 0.0000000 23.365100 6.3723001 0 0 0
557 1 5 0.0 0.0000000 23.365100 10.620499 0 0 0
558 1 5 0.0 0.0000000 23.365100 27.613300 0 0 0
559 1 5 0.0 0.0000000 23.365100 31.861499 0 0 0
560 1 5 0.0 0.0000000 23.365100 36.109699 0 0 0
561 1 5 0.0 0.0000000 27.613300 2.1240999 0 0 0
562 1 5 0.0 0.0000000 27.613300 6.3723001 0 0 0
563 1 5 0.0 0.0000000 27.613300 10.620499 0 0 0
564 1 5 0.0 0.0000000 27.613300 14.868700 0 0 0
565 1 5 0.0 0.0000000 27.613300 23.365100 0 0 0
566 1 5 0.0 0.0000000 27.613300 27.613300 0 0 0
567 1 5 0.0 0.0000000 27.613300 31.861499 0 0 0
568 1 5 0.0 0.0000000 27.613300 36.109699 0 0 0
569 1 5 0.0 0.0000000 31.861499 6.3723001 0 0 0
570 1 5 0.0 0.0000000 31.861499 10.620499 0 0 0
571 1 5 0.0 0.0000000 31.861499 14.868700 0 0 0
572 1 5 0.0 0.0000000 31.861499 19.116899 0 0 0
573 1 5 0.0 0.0000000 31.861499 23.365100 0 0 0
574 1 5 0.0 0.0000000 31.861499 27.613300 0 0 0
575 1 5 0.0 0.0000000 31.861499 31.861499 0 0 0
576 1 5 0.0 0.0000000 36.109699 10.620499 0 0 0
577 1 5 0.0 0.0000000 36.109699 14.868700 0 0 0
578 1 5 0.0 0.0000000 36.109699 19.116899 0 0 0
579 1 5 0.0 0.0000000 36.109699 23.365100 0 0 0
580 1 5 0.0 0.0000000 36.109699 27.613300 0 0 0
581 1 5 0.0 4.2481999 2.1240999 10.620499 0 0 0
582 1 5 0.0 4.2481999 2.1240999 14.868700 0 0 0
583 1 5 0.0 4.2481999 2.1240999 19.116899 0 0 0
584 1 5 0.0 4.2481999 2.1240999 23.365100 0 0 0
585 1 5 0.0 4.2481999 2.1240999 27.613300 0 0 0
586 1 5 0.0 4.2481999 2.1240999 31.861499 0 0 0
587 1 5 0.0 4.2481999 6.3723001 14.868700 0 0 0
588 1 5 0.0 4.2481999 6.3723001 19.116899 0 0 0
589 1 5 0.0 4.2481999 6.3723001 23.365100 0 0 0
590 1 5 0.0 4.2481999 6.3723001 27.613300 0 0 0
591 1 5 0.0 4.2481999 6.3723001 31.861499 0 0 0
592 1 5 0.0 4.2481999 6.3723001 36.109699 0 0 0
593 1 5 0.0 4.2481999 10.620499 2.1240999 0 0 0
594 1 5 0.0 4.2481999 10.620499 19.116899 0 0 0
595 1 5 0.0 4.2481999 10.620499 23.365100 0 0 0
596 1 5 0.0 4.2481999 10.620499 27.613300 0 0 0
597 1 5 0.0 4.2481999 10.620499 31.861499 0 0 0
598 1 5 0.0 4.2481999 10.620499 36.109699 0 0 0
599 1 5 0.0 4.2481999 14.868700 2.1240999 0 0 0
600 1 5 0.0 4.2481999 14.868700 6.3723001 0 0 0
601 1 5 0.0 4.2481999 14.868700 23.365100 0 0 0
602 1 5 0.0 4.2481999 14.868700 27.613300 0 0 0
603 1 5 0.0 4.2481999 14.868700 31.861499 0 0 0
604 1 5 0.0 4.2481999 14.868700 36.109699 0 0 0
605 1 5 0.0 4.2481999 19.116899 2.1240999 0 0 0
606 1 5 0.0 4.2481999 19.116899 6.3723001 0 0 0
607 1 5 0.0 4.2481999 19.116899 10.620499 0 0 0
608 1 5 0.0 4.2481999 19.116899 27.613300 0 0 0
609 1 5 0.0 4.2481999 19.116899 31.861499 0 0 0
610 1 5 0.0 4.2481999 19.116899 36.109699 0 0 0
611 1 5 0.0 4.2481999 23.365100 2.1240999 0 0 0
612 1 5 0.0 4.2481999 23.365100 6.3723001 0 0 0
613 1 5 0.0 4.2481999 23.365100 10.620499 0 0 0
614 1 5 0.0 4.2481999 23.365100 14.868700 0 0 0
615 1 5 0.0 4.2481999 23.365100 27.613300 0 0 0
616 1 5 0.0 4.2481999 23.365100 31.861499 0 0 0
617 1 5 0.0 4.2481999 23.365100 36.109699 0 0 0
618 1 5 0.0 4.2481999 27.613300 2.1240999 0 0 0
619 1 5 0.0 4.2481999 27.613300 6.3723001 0 0 0
620 1 5 0.0 4.2481999 27.613300 10.620499 0 0 0
621 1 5 0.0 4.2481999 27.613300 14.868700 0 0 0
622 1 5 0.0 4.2481999 27.613300 19.116899 0 0 0
623 1 5 0.0 4.2481999 27.613300 23.365100 0 0 0
624 1 5 0.0 4.2481999 27.613300 36.109699 0 0 0
625 1 5 0.0 4.2481999 31.861499 2.1240999 0 0 0
626 1 5 0.0 4.2481999 31.861499 6.3723001 0 0 0
627 1 5 0.0 4.2481999 31.861499 10.620499 0 0 0
628 1 5 0.0 4.2481999 31.861499 14.868700 0 0 0
629 1 5 0.0 4.2481999 31.861499 19.116899 0 0 0
630 1 5 0.0 4.2481999 31.861499 23.365100 0 0 0
631 1 5 0.0 4.2481999 31.861499 27.613300 0 0 0
632 1 5 0.0 4.2481999 36.109699 6.3723001 0 0 0
633 1 5 0.0 4.2481999 36.109699 10.620499 0 0 0
634 1 5 0.0 4.2481999 36.109699 14.868700 0 0 0
635 1 5 0.0 4.2481999 36.109699 19.116899 0 0 0
636 1 5 0.0 4.2481999 36.109699 23.365100 0 0 0
637 1 5 0.0 4.2481999 36.109699 27.613300 0 0 0
638 1 5 0.0 8.4963998 2.1240999 2.1240999 0 0 0
639 1 5 0.0 8.4963998 2.1240999 14.868700 0 0 0
640 1 5 0.0 8.4963998 2.1240999 19.116899 0 0 0
641 1 5 0.0 8.4963998 2.1240999 23.365100 0 0 0
642 1 5 0.0 8.4963998 2.1240999 27.613300 0 0 0
643 1 5 0.0 8.4963998 2.1240999 31.861499 0 0 0
644 1 5 0.0 8.4963998 2.1240999 36.109699 0 0 0
645 1 5 0.0 8.4963998 6.3723001 2.1240999 0 0 0
646 1 5 0.0 8.4963998 6.3723001 19.116899 0 0 0
647 1 5 0.0 8.4963998 6.3723001 23.365100 0 0 0
648 1 5 0.0 8.4963998 6.3723001 27.613300 0 0 0
649 1 5 0.0 8.4963998 6.3723001 31.861499 0 0 0
650 1 5 0.0 8.4963998 6.3723001 36.109699 0 0 0
651 1 5 0.0 8.4963998 10.620499 19.116899 0 0 0
652 1 5 0.0 8.4963998 10.620499 23.365100 0 0 0
653 1 5 0.0 8.4963998 10.620499 27.613300 0 0 0
654 1 5 0.0 8.4963998 10.620499 31.861499 0 0 0
655 1 5 0.0 8.4963998 10.620499 36.109699 0 0 0
656 1 5 0.0 8.4963998 14.868700 2.1240999 0 0 0
657 1 5 0.0 8.4963998 14.868700 14.868700 0 0 0
658 1 5 0.0 8.4963998 14.868700 19.116899 0 0 0
659 1 5 0.0 8.4963998 14.868700 23.365100 0 0 0
660 1 5 0.0 8.4963998 14.868700 27.613300 0 0 0
661 1 5 0.0 8.4963998 14.868700 31.861499 0 0 0
662 1 5 0.0 8.4963998 14.868700 36.109699 0 0 0
663 1 5 0.0 8.4963998 19.116899 2.1240999 0 0 0
664 1 5 0.0 8.4963998 19.116899 6.3723001 0 0 0
665 1 5 0.0 8.4963998 19.116899 10.620499 0 0 0
666 1 5 0.0 8.4963998 19.116899 14.868700 0 0 0
667 1 5 0.0 8.4963998 19.116899 19.116899 0 0 0
668 1 5 0.0 8.4963998 19.116899 23.365100 0 0 0
669 1 5 0.0 8.4963998 19.116899 27.613300 0 0 0
670 1 5 0.0 8.4963998 19.116899 31.861499 0 0 0
671 1 5 0.0 8.4963998 19.116899 36.109699 0 0 0
672 1 5 0.0 8.4963998 23.365100 2.1240999 0 0 0
673 1 5 0.0 8.4963998 23.365100 6.3723001 0 0 0
674 1 5 0.0 8.4963998 23.365100 10.620499 0 0 0
675 1 5 0.0 8.4963998 23.365100 14.868700 0 0 0
676 1 5 0.0 8.4963998 23.365100 19.116899 0 0 0
677 1 5 0.0 8.4963998 23.365100 31.861499 0 0 0
678 1 5 0.0 8.4963998 23.365100 36.109699 0 0 0
679 1 5 0.0 8.4963998 27.613300 2.1240999 0 0 0
680 1 5 0.0 8.4963998 27.613300 6.3723001 0 0 0
681 1 5 0.0 8.4963998 27.613300 10.620499 0 0 0
682 1 5 0.0 8.4963998 27.613300 14.868700 0 0 0
683 1 5 0.0 8.4963998 27.613300 19.116899 0 0 0
684 1 5 0.0 8.4963998 31.861499 2.1240999 0 0 0
685 1 5 0.0 8.4963998 31.861499 6.3723001 0 0 0
686 1 5 0.0 8.4963998 31.861499 10.620499 0 0 0
687 1 5 0.0 8.4963998 31.861499 14.868700 0 0 0
688 1 5 0.0 8.4963998 31.861499 19.116899 0 0 0
689 1 5 0.0 8.4963998 36.109699 2.1240999 0 0 0
690 1 5 0.0 8.4963998 36.109699 6.3723001 0 0 0
691 1 5 0.0 8.4963998 36.109699 10.620499 0 0 0
692 1 5 0.0 8.4963998 36.109699 14.868700 0 0 0
693 1 5 0.0 8.4963998 36.109699 19.116899 0 0 0
694 1 5 0.0 8.4963998 36.109699 23.365100 0 0 0
695 1 5 0.0 8.4963998 36.109699 27.613300 0 0 0
696 1 5 0.0 8.4963998 36.109699 31.861499 0 0 0
697 1 5 0.0 8.4963998 36.109699 36.109699 0 0 0
698 1 5 0.0 12.744600 2.1240999 2.1240999 0 0 0
699 1 5 0.0 12.744600 2.1240999 6.3723001 0 0 0
700 1 5 0.0 12.744600 2.1240999 10.620499 0 0 0
701 1 5 0.0 12.744600 2.1240999 14.868700 0 0 0
702 1 5 0.0 12.744600 2.1240999 27.613300 0 0 0
703 1 5 0.0 12.744600 2.1240999 31.861499 0 0 0
704 1 5 0.0 12.744600 2.1240999 36.109699 0 0 0
705 1 5 0.0 12.744600 6.3723001 2.1240999 0 0 0
706 1 5 0.0 12.744600 6.3723001 6.3723001 0 0 0
707 1 5 0.0 12.744600 6.3723001 23.365100 0 0 0
708 1 5 0.0 12.744600 6.3723001 27.613300 0 0 0
709 1 5 0.0 12.744600 6.3723001 31.861499 0 0 0
710 1 5 0.0 12.744600 6.3723001 36.109699 0 0 0
711 1 5 0.0 12.744600 10.620499 19.116899 0 0 0
712 1 5 0.0 12.744600 10.620499 23.365100 0 0 0
713 1 5 0.0 12.744600 10.620499 27.613300 0 0 0
714 1 5 0.0 12.744600 10.620499 31.861499 0 0 0
715 1 5 0.0 12.744600 10.620499 36.109699 0 0 0
716 1 5 0.0 12.744600 14.868700 10.620499 0 0 0
717 1 5 0.0 12.744600 14.868700 14.868700 0 0 0
718 1 5 0.0 12.744600 14.868700 19.116899 0 0 0
719 1 5 0.0 12.744600 14.868700 23.365100 0 0 0
720 1 5 0.0 12.744600 14.868700 27.613300 0 0 0
721 1 5 0.0 12.744600 14.868700 31.861499 0 0 0
722 1 5 0.0 12.744600 14.868700 36.109699 0 0 0
723 1 5 0.0 12.744600 19.116899 6.3723001 0 0 0
724 1 5 0.0 12.744600 19.116899 10.620499 0 0 0
725 1 5 0.0 12.744600 19.116899 14.868700 0 0 0
726 1 5 0.0 12.744600 19.116899 19.116899 0 0 0
727 1 5 0.0 12.744600 19.116899 23.365100 0 0 0
728 1 5 0.0 12.744600 19.116899 27.613300 0 0 0
729 1 5 0.0 12.744600 19.116899 31.861499 0 0 0
730 1 5 0.0 12.744600 23.365100 2.1240999 0 0 0
731 1 5 0.0 12.744600 23.365100 6.3723001 0 0 0
732 1 5 0.0 12.744600 23.365100 10.620499 0 0 0
733 1 5 0.0 12.744600 23.365100 14.868700 0 0 0
734 1 5 0.0 12.744600 23.365100 19.116899 0 0 0
735 1 5 0.0 12.744600 23.365100 23.365100 0 0 0
736 1 5 0.0 12.744600 23.365100 36.109699 0 0 0
737 1 5 0.0 12.744600 27.613300 2.1240999 0 0 0
738 1 5 0.0 12.744600 27.613300 6.3723001 0 0 0
739 1 5 0.0 12.744600 27.613300 10.620499 0 0 0
740 1 5 0.0 12.744600 27.613300 14.868700 0 0 0
741 1 5 0.0 12.744600 27.613300 19.116899 0 0 0
742 1 5 0.0 12.744600 27.613300 36.109699 0 0 0
743 1 5 0.0 12.744600 31.861499 2.1240999 0 0 0
744 1 5 0.0 12.744600 31.861499 6.3723001 0 0 0
745 1 5 0.0 12.744600 31.861499 10.620499 0 0 0
746 1 5 0.0 12.744600 31.861499 14.868700 0 0 0
747 1 5 0.0 12.744600 31.861499 19.116899 0 0 0
748 1 5 0.0 12.744600 31.861499 36.109699 0 0 0
749 1 5 0.0 12.744600 36.109699 2.1240999 0 0 0
750 1 5 0.0 12.744600 36.109699 6.3723001 0 0 0
751 1 5 0.0 12.744600 36.109699 10.620499 0 0 0
752 1 5 0.0 12.744600 36.109699 14.868700 0 0 0
753 1 5 0.0 12.744600 36.109699 19.116899 0 0 0
754 1 5 0.0 12.744600 36.109699 31.861499 0 0 0
755 1 5 0.0 12.744600 36.109699 36.109699 0 0 0
756 1 5 0.0 16.992799 2.1240999 2.1240999 0 0 0
757 1 5 0.0 16.992799 2.1240999 6.3723001 0 0 0
758 1 5 0.0 16.992799 2.1240999 10.620499 0 0 0
759 1 5 0.0 16.992799 2.1240999 27.613300 0 0 0
760 1 5 0.0 16.992799 2.1240999 31.861499 0 0 0
761 1 5 0.0 16.992799 2.1240999 36.109699 0 0 0
762 1 5 0.0 16.992799 6.3723001 2.1240999 0 0 0
763 1 5 0.0 16.992799 6.3723001 6.3723001 0 0 0
764 1 5 0.0 16.992799 6.3723001 10.620499 0 0 0
765 1 5 0.0 16.992799 6.3723001 23.365100 0 0 0
766 1 5 0.0 16.992799 6.3723001 27.613300 0 0 0
767 1 5 0.0 16.992799 6.3723001 31.861499 0 0 0
768 1 5 0.0 16.992799 6.3723001 36.109699 0 0 0
769 1 5 0.0 16.992799 10.620499 2.1240999 0 0 0
770 1 5 0.0 16.992799 10.620499 6.3723001 0 0 0
771 1 5 0.0 16.992799 10.620499 10.620499 0 0 0
772 1 5 0.0 16.992799 10.620499 14.868700 0 0 0
773 1 5 0.0 16.992799 10.620499 19.116899 0 0 0
774 1 5 0.0 16.992799 10.620499 23.365100 0 0 0
775 1 5 0.0 16.992799 10.620499 27.613300 0 0 0
776 1 5 0.0 16.992799 10.620499 31.861499 0 0 0
777 1 5 0.0 16.992799 10.620499 36.109699 0 0 0
778 1 5 0.0 16.992799 14.868700 10.620499 0 0 0
779 1 5 0.0 16.992799 14.868700 14.868700 0 0 0
780 1 5 0.0 16.992799 14.868700 19.116899 0 0 0
781 1 5 0.0 16.992799 14.868700 23.365100 0 0 0
782 1 5 0.0 16.992799 14.868700 27.613300 0 0 0
783 1 5 0.0 16.992799 14.868700 31.861499 0 0 0
784 1 5 0.0 16.992799 19.116899 10.620499 0 0 0
785 1 5 0.0 16.992799 19.116899 14.868700 0 0 0
786 1 5 0.0 16.992799 19.116899 19.116899 0 0 0
787 1 5 0.0 16.992799 19.116899 23.365100 0 0 0
788 1 5 0.0 16.992799 19.116899 27.613300 0 0 0
789 1 5 0.0 16.992799 23.365100 2.1240999 0 0 0
790 1 5 0.0 16.992799 23.365100 6.3723001 0 0 0
791 1 5 0.0 16.992799 23.365100 10.620499 0 0 0
792 1 5 0.0 16.992799 23.365100 14.868700 0 0 0
793 1 5 0.0 16.992799 23.365100 19.116899 0 0 0
794 1 5 0.0 16.992799 23.365100 23.365100 0 0 0
795 1 5 0.0 16.992799 23.365100 27.613300 0 0 0
796 1 5 0.0 16.992799 27.613300 2.1240999 0 0 0
797 1 5 0.0 16.992799 27.613300 6.3723001 0 0 0
798 1 5 0.0 16.992799 27.613300 10.620499 0 0 0
799 1 5 0.0 16.992799 27.613300 14.868700 0 0 0
800 1 5 0.0 16.992799 27.613300 19.116899 0 0 0
801 1 5 0.0 16.992799 27.613300 23.365100 0 0 0
802 1 5 0.0 16.992799 27.613300 36.109699 0 0 0
803 1 5 0.0 16.992799 31.861499 2.1240999 0 0 0
804 1 5 0.0 16.992799 31.861499 6.3723001 0 0 0
805 1 5 0.0 16.992799 31.861499 10.620499 0 0 0
806 1 5 0.0 16.992799 31.861499 14.868700 0 0 0
807 1 5 0.0 16.992799 31.861499 31.861499 0 0 0
808 1 5 0.0 16.992799 31.861499 36.109699 0 0 0
809 1 5 0.0 16.992799 36.109699 2.1240999 0 0 0
810 1 5 0.0 16.992799 36.109699 6.3723001 0 0 0
811 1 5 0.0 16.992799 36.109699 10.620499 0 0 0
812 1 5 0.0 16.992799 36.109699 31.861499 0 0 0
813 1 5 0.0 16.992799 36.109699 36.109699 0 0 0
814 1 5 0.0 21.240999 2.1240999 2.1240999 0 0 0
815 1 5 0.0 21.240999 2.1240999 6.3723001 0 0 0
816 1 5 0.0 21.240999 2.1240999 10.620499 0 0 0
817 1 5 0.0 21.240999 2.1240999 27.613300 0 0 0
818 1 5 0.0 21.240999 2.1240999 31.861499 0 0 0
819 1 5 0.0 21.240999 2.1240999 36.109699 0 0 0
820 1 5 0.0 21.240999 6.3723001 2.1240999 0 0 0
821 1 5 0.0 21.240999 6.3723001 6.3723001 0 0 0
822 1 5 0.0 21.240999 6.3723001 10.620499 0 0 0
823 1 5 0.0 21.240999 6.3723001 14.868700 0 0 0
824 1 5 0.0 21.240999 6.3723001 27.613300 0 0 0
825 1 5 0.0 21.240999 6.3723001 31.861499 0 0 0
826 1 5 0.0 21.240999 6.3723001 36.109699 0 0 0
827 1 5 0.0 21.240999 10.620499 2.1240999 0 0 0
828 1 5 0.0 21.240999 10.620499 6.3723001 0 0 0
829 1 5 0.0 21.240999 10.620499 10.620499 0 0 0
830 1 5 0.0 21.240999 10.620499 14.868700 0 0 0
831 1 5 0.0 21.240999 10.620499 19.116899 0 0 0
832 1 5 0.0 21.240999 10.620499 23.365100 0 0 0
833 1 5 0.0 21.240999 10.620499 27.613300 0 0 0
834 1 5 0.0 21.240999 14.868700 6.3723001 0 0 0
835 1 5 0.0 21.240999 14.868700 10.620499 0 0 0
836 1 5 0.0 21.240999 14.868700 14.868700 0 0 0
837 1 5 0.0 21.240999 14.868700 19.116899 0 0 0
838 1 5 0.0 21.240999 14.868700 23.365100 0 0 0
839 1 5 0.0 21.240999 14.868700 27.613300 0 0 0
840 1 5 0.0 21.240999 19.116899 10.620499 0 0 0
841 1 5 0.0 21.240999 19.116899 14.868700 0 0 0
842 1 5 0.0 21.240999 19.116899 19.116899 0 0 0
843 1 5 0.0 21.240999 19.116899 23.365100 0 0 0
844 1 5 0.0 21.240999 19.116899 27.613300 0 0 0
845 1 5 0.0 21.240999 23.365100 10.620499 0 0 0
846 1 5 0.0 21.240999 23.365100 14.868700 0 0 0
847 1 5 0.0 21.240999 23.365100 19.116899 0 0 0
848 1 5 0.0 21.240999 23.365100 23.365100 0 0 0
849 1 5 0.0 21.240999 23.365100 27.613300 0 0 0
850 1 5 0.0 21.240999 23.365100 31.861499 0 0 0
851 1 5 0.0 21.240999 27.613300 2.1240999 0 0 0
852 1 5 0.0 21.240999 27.613300 6.3723001 0 0 0
853 1 5 0.0 21.240999 27.613300 14.868700 0 0 0
854 1 5 0.0 21.240999 27.613300 19.116899 0 0 0
855 1 5 0.0 21.240999 27.613300 23.365100 0 0 0
856 1 5 0.0 21.240999 27.613300 27.613300 0 0 0
857 1 5 0.0 21.240999 27.613300 31.861499 0 0 0
858 1 5 0.0 21.240999 27.613300 36.109699 0 0 0
859 1 5 0.0 21.240999 31.861499 2.1240999 0 0 0
860 1 5 0.0 21.240999 31.861499 6.3723001 0 0 0
861 1 5 0.0 21.240999 31.861499 19.116899 0 0 0
862 1 5 0.0 21.240999 31.861499 23.365100 0 0 0
863 1 5 0.0 21.240999 31.861499 27.613300 0 0 0
864 1 5 0.0 21.240999 31.861499 31.861499 0 0 0
865 1 5 0.0 21.240999 31.861499 36.109699 0 0 0
866 1 5 0.0 21.240999 36.109699 2.1240999 0 0 0
867 1 5 0.0 21.240999 36.109699 6.3723001 0 0 0
868 1 5 0.0 21.240999 36.109699 10.620499 0 0 0
869 1 5 0.0 21.240999 36.109699 27.613300 0 0 0
870 1 5 0.0 21.240999 36.109699 31.861499 0 0 0
871 1 5 0.0 21.240999 36.109699 36.109699 0 0 0
872 1 5 0.0 25.489200 2.1240999 2.1240999 0 0 0
873 1 5 0.0 25.489200 2.1240999 6.3723001 0 0 0
874 1 5 0.0 25.489200 2.1240999 10.620499 0 0 0
875 1 5 0.0 25.489200 2.1240999 14.868700 0 0 0
876 1 5 0.0 25.489200 2.1240999 27.613300 0 0 0
877 1 5 0.0 25.489200 2.1240999 31.861499 0 0 0
878 1 5 0.0 25.489200 2.1240999 36.109699 0 0 0
879 1 5 0.0 25.489200 6.3723001 2.1240999 0 0 0
880 1 5 0.0 25.489200 6.3723001 6.3723001 0 0 0
881 1 5 0.0 25.489200 6.3723001 10.620499 0 0 0
882 1 5 0.0 25.489200 6.3723001 14.868700 0 0 0
883 1 5 0.0 25.489200 6.3723001 19.116899 0 0 0
884 1 5 0.0 25.489200 6.3723001 36.109699 0 0 0
885 1 5 0.0 25.489200 10.620499 2.1240999 0 0 0
886 1 5 0.0 25.489200 10.620499 6.3723001 0 0 0
887 1 5 0.0 25.489200 10.620499 10.620499 0 0 0
888 1 5 0.0 25.489200 10.620499 14.868700 0 0 0
889 1 5 0.0 25.489200 10.620499 19.116899 0 0 0
890 1 5 0.0 25.489200 10.620499 23.365100 0 0 0
891 1 5 0.0 25.489200 14.868700 6.3723001 0 0 0
892 1 5 0.0 25.489200 14.868700 10.620499 0 0 0
893 1 5 0.0 25.489200 14.868700 14.868700 0 0 0
894 1 5 0.0 25.489200 14.868700 19.116899 0 0 0
895 1 5 0.0 25.489200 14.868700 23.365100 0 0 0
896 1 5 0.0 25.489200 14.868700 27.613300 0 0 0
897 1 5 0.0 25.489200 19.116899 10.620499 0 0 0
898 1 5 0.0 25.489200 19.116899 14.868700 0 0 0
899 1 5 0.0 25.489200 19.116899 19.116899 0 0 0
900 1 5 0.0 25.489200 19.116899 23.365100 0 0 0
901 1 5 0.0 25.489200 19.116899 27.613300 0 0 0
902 1 5 0.0 25.489200 19.116899 31.861499 0 0 0
903 1 5 0.0 25.489200 19.116899 36.109699 0 0 0
904 1 5 0.0 25.489200 23.365100 2.1240999 0 0 0
905 1 5 0.0 25.489200 23.365100 14.868700 0 0 0
906 1 5 0.0 25.489200 23.365100 19.116899 0 0 0
907 1 5 0.0 25.489200 23.365100 23.365100 0 0 0
908 1 5 0.0 25.489200 23.365100 27.613300 0 0 0
909 1 5 0.0 25.489200 23.365100 31.861499 0 0 0
910 1 5 0.0 25.489200 23.365100 36.109699 0 0 0
911 1 5 0.0 25.489200 27.613300 2.1240999 0 0 0
912 1 5 0.0 25.489200 27.613300 19.116899 0 0 0
913 1 5 0.0 25.489200 27.613300 23.365100 0 0 0
914 1 5 0.0 25.489200 27.613300 27.613300 0 0 0
915 1 5 0.0 25.489200 27.613300 31.861499 0 0 0
916 1 5 0.0 25.489200 27.613300 36.109699 0 0 0
917 1 5 0.0 25.489200 31.861499 2.1240999 0 0 0
918 1 5 0.0 25.489200 31.861499 19.116899 0 0 0
919 1 5 0.0 25.489200 31.861499 23.365100 0 0 0
920 1 5 0.0 25.489200 31.861499 27.613300 0 0 0
921 1 5 0.0 25.489200 31.861499 31.861499 0 0 0
922 1 5 0.0 25.489200 31.861499 36.109699 0 0 0
923 1 5 0.0 25.489200 36.109699 2.1240999 0 0 0
924 1 5 0.0 25.489200 36.109699 6.3723001 0 0 0
925 1 5 0.0 25.489200 36.109699 23.365100 0 0 0
926 1 5 0.0 25.489200 36.109699 27.613300 0 0 0
927 1 5 0.0 25.489200 36.109699 31.861499 0 0 0
928 1 5 0.0 25.489200 36.109699 36.109699 0 0 0
929 1 5 0.0 29.737400 2.1240999 2.1240999 0 0 0
930 1 5 0.0 29.737400 2.1240999 6.3723001 0 0 0
931 1 5 0.0 29.737400 2.1240999 10.620499 0 0 0
932 1 5 0.0 29.737400 2.1240999 14.868700 0 0 0
933 1 5 0.0 29.737400 2.1240999 19.116899 0 0 0
934 1 5 0.0 29.737400 2.1240999 23.365100 0 0 0
935 1 5 0.0 29.737400 2.1240999 31.861499 0 0 0
936 1 5 0.0 29.737400 2.1240999 36.109699 0 0 0
937 1 5 0.0 29.737400 6.3723001 2.1240999 0 0 0
938 1 5 0.0 29.737400 6.3723001 6.3723001 0 0 0
939 1 5 0.0 29.737400 6.3723001 10.620499 0 0 0
940 1 5 0.0 29.737400 6.3723001 14.868700 0 0 0
941 1 5 0.0 29.737400 6.3723001 19.116899 0 0 0
942 1 5 0.0 29.737400 6.3723001 36.109699 0 0 0
943 1 5 0.0 29.737400 10.620499 2.1240999 0 0 0
944 1 5 0.0 29.737400 10.620499 6.3723001 0 0 0
945 1 5 0.0 29.737400 10.620499 10.620499 0 0 0
946 1 5 0.0 29.737400 10.620499 14.868700 0 0 0
947 1 5 0.0 29.737400 10.620499 19.116899 0 0 0
948 1 5 0.0 29.737400 14.868700 2.1240999 0 0 0
949 1 5 0.0 29.737400 14.868700 6.3723001 0 0 0
950 1 5 0.0 29.737400 14.868700 10.620499 0 0 0
951 1 5 0.0 29.737400 14.868700 14.868700 0 0 0
952 1 5 0.0 29.737400 14.868700 19.116899 0 0 0
953 1 5 0.0 29.737400 14.868700 36.109699 0 0 0
954 1 5 0.0 29.737400 19.116899 2.1240999 0 0 0
955 1 5 0.0 29.737400 19.116899 6.3723001 0 0 0
956 1 5 0.0 29.737400 19.116899 10.620499 0 0 0
957 1 5 0.0 29.737400 19.116899 14.868700 0 0 0
958 1 5 0.0 29.737400 19.116899 19.116899 0 0 0
959 1 5 0.0 29.737400 19.116899 23.365100 0 0 0
960 1 5 0.0 29.737400 19.116899 27.613300 0 0 0
961 1 5 0.0 29.737400 19.116899 31.861499 0 0 0
962 1 5 0.0 29.737400 19.116899 36.109699 0 0 0
963 1 5 0.0 29.737400 23.365100 2.1240999 0 0 0
964 1 5 0.0 29.737400 23.365100 19.116899 0 0 0
965 1 5 0.0 29.737400 23.365100 23.365100 0 0 0
966 1 5 0.0 29.737400 23.365100 27.613300 0 0 0
967 1 5 0.0 29.737400 23.365100 31.861499 0 0 0
968 1 5 0.0 29.737400 23.365100 36.109699 0 0 0
969 1 5 0.0 29.737400 27.613300 19.116899 0 0 0
970 1 5 0.0 29.737400 27.613300 23.365100 0 0 0
971 1 5 0.0 29.737400 27.613300 27.613300 0 0 0
972 1 5 0.0 29.737400 27.613300 31.861499 0 0 0
973 1 5 0.0 29.737400 27.613300 36.109699 0 0 0
974 1 5 0.0 29.737400 31.861499 19.116899 0 0 0
975 1 5 0.0 29.737400 31.861499 23.365100 0 0 0
976 1 5 0.0 29.737400 31.861499 27.613300 0 0 0
977 1 5 0.0 29.737400 31.861499 31.861499 0 0 0
978 1 5 0.0 29.737400 31.861499 36.109699 0 0 0
979 1 5 0.0 29.737400 36.109699 10.620499 0 0 0
980 1 5 0.0 29.737400 36.109699 14.868700 0 0 0
981 1 5 0.0 29.737400 36.109699 19.116899 0 0 0
982 1 5 0.0 29.737400 36.109699 23.365100 0 0 0
983 1 5 0.0 29.737400 36.109699 27.613300 0 0 0
984 1 5 0.0 29.737400 36.109699 31.861499 0 0 0
985 1 5 0.0 29.737400 36.109699 36.109699 0 0 0
986 1 5 0.0 33.985599 2.1240999 6.3723001 0 0 0
987 1 5 0.0 33.985599 2.1240999 10.620499 0 0 0
988 1 5 0.0 33.985599 2.1240999 14.868700 0 0 0
989 1 5 0.0 33.985599 2.1240999 19.116899 0 0 0
990 1 5 0.0 33.985599 2.1240999 23.365100 0 0 0
991 1 5 0.0 33.985599 2.1240999 27.613300 0 0 0
992 1 5 0.0 33.985599 6.3723001 2.1240999 0 0 0
993 1 5 0.0 33.985599 6.3723001 6.3723001 0 0 0
994 1 5 0.0 33.985599 6.3723001 10.620499 0 0 0
995 1 5 0.0 33.985599 6.3723001 14.868700 0 0 0
996 1 5 0.0 33.985599 6.3723001 19.116899 0 0 0
997 1 5 0.0 33.985599 6.3723001 23.365100 0 0 0
998 1 5 0.0 33.985599 10.620499 2.1240999 0 0 0
999 1 5 0.0 33.985599 10.620499 6.3723001 0 0 0
1000 1 5 0.0 33.985599 10.620499 10.620499 0 0 0
1001 1 5 0.0 33.985599 10.620499 14.868700 0 0 0
1002 1 5 0.0 33.985599 10.620499 19.116899 0 0 0
1003 1 5 0.0 33.985599 10.620499 23.365100 0 0 0
1004 1 5 0.0 33.985599 10.620499 36.109699 0 0 0
1005 1 5 0.0 33.985599 14.868700 2.1240999 0 0 0
1006 1 5 0.0 33.985599 14.868700 6.3723001 0 0 0
1007 1 5 0.0 33.985599 14.868700 10.620499 0 0 0
1008 1 5 0.0 33.985599 14.868700 14.868700 0 0 0
1009 1 5 0.0 33.985599 14.868700 31.861499 0 0 0
1010 1 5 0.0 33.985599 14.868700 36.109699 0 0 0
1011 1 5 0.0 33.985599 19.116899 2.1240999 0 0 0
1012 1 5 0.0 33.985599 19.116899 6.3723001 0 0 0
1013 1 5 0.0 33.985599 19.116899 10.620499 0 0 0
1014 1 5 0.0 33.985599 19.116899 27.613300 0 0 0
1015 1 5 0.0 33.985599 19.116899 31.861499 0 0 0
1016 1 5 0.0 33.985599 19.116899 36.109699 0 0 0
1017 1 5 0.0 33.985599 23.365100 2.1240999 0 0 0
1018 1 5 0.0 33.985599 23.365100 6.3723001 0 0 0
1019 1 5 0.0 33.985599 23.365100 10.620499 0 0 0
1020 1 5 0.0 33.985599 23.365100 23.365100 0 0 0
1021 1 5 0.0 33.985599 23.365100 27.613300 0 0 0
1022 1 5 0.0 33.985599 23.365100 31.861499 0 0 0
1023 1 5 0.0 33.985599 23.365100 36.109699 0 0 0
1024 1 5 0.0 33.985599 27.613300 2.1240999 0 0 0
1025 1 5 0.0 33.985599 27.613300 6.3723001 0 0 0
1026 1 5 0.0 33.985599 27.613300 19.116899 0 0 0
1027 1 5 0.0 33.985599 27.613300 23.365100 0 0 0
1028 1 5 0.0 33.985599 27.613300 27.613300 0 0 0
1029 1 5 0.0 33.985599 27.613300 31.861499 0 0 0
1030 1 5 0.0 33.985599 27.613300 36.109699 0 0 0
1031 1 5 0.0 33.985599 31.861499 14.868700 0 0 0
1032 1 5 0.0 33.985599 31.861499 19.116899 0 0 0
1033 1 5 0.0 33.985599 31.861499 23.365100 0 0 0
1034 1 5 0.0 33.985599 31.861499 27.613300 0 0 0
1035 1 5 0.0 33.985599 31.861499 31.861499 0 0 0
1036 1 5 0.0 33.985599 31.861499 36.109699 0 0 0
1037 1 5 0.0 33.985599 36.109699 10.620499 0 0 0
1038 1 5 0.0 33.985599 36.109699 14.868700 0 0 0
1039 1 5 0.0 33.985599 36.109699 19.116899 0 0 0
1040 1 5 0.0 33.985599 36.109699 23.365100 0 0 0
1041 1 5 0.0 33.985599 36.109699 27.613300 0 0 0
1042 1 5 0.0 33.985599 36.109699 31.861499 0 0 0
1043 1 5 0.0 2.1240999 0.0000000 10.620499 0 0 0
1044 1 5 0.0 2.1240999 0.0000000 14.868700 0 0 0
1045 1 5 0.0 2.1240999 0.0000000 19.116899 0 0 0
1046 1 5 0.0 2.1240999 0.0000000 23.365100 0 0 0
1047 1 5 0.0 2.1240999 0.0000000 27.613300 0 0 0
1048 1 5 0.0 2.1240999 4.2481999 10.620499 0 0 0
1049 1 5 0.0 2.1240999 4.2481999 14.868700 0 0 0
1050 1 5 0.0 2.1240999 4.2481999 19.116899 0 0 0
1051 1 5 0.0 2.1240999 4.2481999 23.365100 0 0 0
1052 1 5 0.0 2.1240999 4.2481999 27.613300 0 0 0
1053 1 5 0.0 2.1240999 4.2481999 31.861499 0 0 0
1054 1 5 0.0 2.1240999 8.4963998 2.1240999 0 0 0
1055 1 5 0.0 2.1240999 8.4963998 6.3723001 0 0 0
1056 1 5 0.0 2.1240999 8.4963998 14.868700 0 0 0
1057 1 5 0.0 2.1240999 8.4963998 19.116899 0 0 0
1058 1 5 0.0 2.1240999 8.4963998 23.365100 0 0 0
1059 1 5 0.0 2.1240999 8.4963998 27.613300 0 0 0
1060 1 5 0.0 2.1240999 8.4963998 31.861499 0 0 0
1061 1 5 0.0 2.1240999 8.4963998 36.109699 0 0 0
1062 1 5 0.0 2.1240999 12.744600 2.1240999 0 0 0
1063 1 5 0.0 2.1240999 12.744600 6.3723001 0 0 0
1064 1 5 0.0 2.1240999 12.744600 19.116899 0 0 0
1065 1 5 0.0 2.1240999 12.744600 23.365100 0 0 0
1066 1 5 0.0 2.1240999 12.744600 27.613300 0 0 0
1067 1 5 0.0 2.1240999 12.744600 31.861499 0 0 0
1068 1 5 0.0 2.1240999 12.744600 36.109699 0 0 0
1069 1 5 0.0 2.1240999 16.992799 2.1240999 0 0 0
1070 1 5 0.0 2.1240999 16.992799 6.3723001 0 0 0
1071 1 5 0.0 2.1240999 16.992799 10.620499 0 0 0
1072 1 5 0.0 2.1240999 16.992799 27.613300 0 0 0
1073 1 5 0.0 2.1240999 16.992799 31.861499 0 0 0
1074 1 5 0.0 2.1240999 16.992799 36.109699 0 0 0
1075 1 5 0.0 2.1240999 21.240999 2.1240999 0 0 0
1076 1 5 0.0 2.1240999 21.240999 6.3723001 0 0 0
1077 1 5 0.0 2.1240999 21.240999 10.620499 0 0 0
1078 1 5 0.0 2.1240999 21.240999 27.613300 0 0 0
1079 1 5 0.0 2.1240999 21.240999 31.861499 0 0 0
1080 1 5 0.0 2.1240999 21.240999 36.109699 0 0 0
1081 1 5 0.0 2.1240999 25.489200 2.1240999 0 0 0
1082 1 5 0.0 2.1240999 25.489200 6.3723001 0 0 0
1083 1 5 0.0 2.1240999 25.489200 10.620499 0 0 0
1084 1 5 0.0 2.1240999 25.489200 14.868700 0 0 0
1085 1 5 0.0 2.1240999 25.489200 27.613300 0 0 0
1086 1 5 0.0 2.1240999 25.489200 31.861499 0 0 0
1087 1 5 0.0 2.1240999 25.489200 36.109699 0 0 0
1088 1 5 0.0 2.1240999 29.737400 2.1240999 0 0 0
1089 1 5 0.0 2.1240999 29.737400 6.3723001 0 0 0
1090 1 5 0.0 2.1240999 29.737400 10.620499 0 0 0
1091 1 5 0.0 2.1240999 29.737400 14.868700 0 0 0
1092 1 5 0.0 2.1240999 29.737400 19.116899 0 0 0
1093 1 5 0.0 2.1240999 29.737400 23.365100 0 0 0
1094 1 5 0.0 2.1240999 29.737400 27.613300 0 0 0
1095 1 5 0.0 2.1240999 33.985599 6.3723001 0 0 0
1096 1 5 0.0 2.1240999 33.985599 10.620499 0 0 0
1097 1 5 0.0 2.1240999 33.985599 14.868700 0 0 0
1098 1 5 0.0 2.1240999 33.985599 19.116899 0 0 0
1099 1 5 0.0 2.1240999 33.985599 23.365100 0 0 0
1100 1 5 0.0 2.1240999 33.985599 27.613300 0 0 0
1101 1 5 0.0 6.3723001 0.0000000 10.620499 0 0 0
1102 1 5 0.0 6.3723001 0.0000000 14.868700 0 0 0
1103 1 5 0.0 6.3723001 0.0000000 19.116899 0 0 0
1104 1 5 0.0 6.3723001 0.0000000 23.365100 0 0 0
1105 1 5 0.0 6.3723001 0.0000000 27.613300 0 0 0
1106 1 5 0.0 6.3723001 0.0000000 31.861499 0 0 0
1107 1 5 0.0 6.3723001 0.0000000 36.109699 0 0 0
1108 1 5 0.0 6.3723001 4.2481999 2.1240999 0 0 0
1109 1 5 0.0 6.3723001 4.2481999 14.868700 0 0 0
1110 1 5 0.0 6.3723001 4.2481999 19.116899 0 0 0
1111 1 5 0.0 6.3723001 4.2481999 23.365100 0 0 0
1112 1 5 0.0 6.3723001 4.2481999 27.613300 0 0 0
1113 1 5 0.0 6.3723001 4.2481999 31.861499 0 0 0
1114 1 5 0.0 6.3723001 4.2481999 36.109699 0 0 0
1115 1 5 0.0 6.3723001 8.4963998 2.1240999 0 0 0
1116 1 5 0.0 6.3723001 8.4963998 19.116899 0 0 0
1117 1 5 0.0 6.3723001 8.4963998 23.365100 0 0 0
1118 1 5 0.0 6.3723001 8.4963998 27.613300 0 0 0
1119 1 5 0.0 6.3723001 8.4963998 31.861499 0 0 0
1120 1 5 0.0 6.3723001 8.4963998 36.109699 0 0 0
1121 1 5 0.0 6.3723001 12.744600 2.1240999 0 0 0
1122 1 5 0.0 6.3723001 12.744600 19.116899 0 0 0
1123 1 5 0.0 6.3723001 12.744600 23.365100 0 0 0
1124 1 5 0.0 6.3723001 12.744600 27.613300 0 0 0
1125 1 5 0.0 6.3723001 12.744600 31.861499 0 0 0
1126 1 5 0.0 6.3723001 12.744600 36.109699 0 0 0
1127 1 5 0.0 6.3723001 16.992799 2.1240999 0 0 0
1128 1 5 0.0 6.3723001 16.992799 6.3723001 0 0 0
1129 1 5 0.0 6.3723001 16.992799 23.365100 0 0 0
1130 1 5 0.0 6.3723001 16.992799 27.613300 0 0 0
1131 1 5 0.0 6.3723001 16.992799 31.861499 0 0 0
1132 1 5 0.0 6.3723001 16.992799 36.109699 0 0 0
1133 1 5 0.0 6.3723001 21.240999 2.1240999 0 0 0
1134 1 5 0.0 6.3723001 21.240999 6.3723001 0 0 0
1135 1 5 0.0 6.3723001 21.240999 10.620499 0 0 0
1136 1 5 0.0 6.3723001 21.240999 14.868700 0 0 0
1137 1 5 0.0 6.3723001 21.240999 27.613300 0 0 0
1138 1 5 0.0 6.3723001 21.240999 31.861499 0 0 0
1139 1 5 0.0 6.3723001 21.240999 36.109699 0 0 0
1140 1 5 0.0 6.3723001 25.489200 2.1240999 0 0 0
1141 1 5 0.0 6.3723001 25.489200 6.3723001 0 0 0
1142 1 5 0.0 6.3723001 25.489200 10.620499 0 0 0
1143 1 5 0.0 6.3723001 25.489200 14.868700 0 0 0
1144 1 5 0.0 6.3723001 25.489200 19.116899 0 0 0
1145 1 5 0.0 6.3723001 25.489200 36.109699 0 0 0
1146 1 5 0.0 6.3723001 29.737400 2.1240999 0 0 0
1147 1 5 0.0 6.3723001 29.737400 6.3723001 0 0 0
1148 1 5 0.0 6.3723001 29.737400 10.620499 0 0 0
1149 1 5 0.0 6.3723001 29.737400 14.868700 0 0 0
1150 1 5 0.0 6.3723001 29.737400 19.116899 0 0 0
1151 1 5 0.0 6.3723001 29.737400 23.365100 0 0 0
1152 1 5 0.0 6.3723001 33.985599 6.3723001 0 0 0
1153 1 5 0.0 6.3723001 33.985599 10.620499 0 0 0
1154 1 5 0.0 6.3723001 33.985599 14.868700 0 0 0
1155 1 5 0.0 6.3723001 33.985599 19.116899 0 0 0
1156 1 5 0.0 6.3723001 33.985599 23.365100 0 0 0
1157 1 5 0.0 6.3723001 33.985599 27.613300 0 0 0
1158 1 5 0.0 10.620499 0.0000000 2.1240999 0 0 0
1159 1 5 0.0 10.620499 0.0000000 6.3723001 0 0 0
1160 1 5 0.0 10.620499 0.0000000 10.620499 0 0 0
1161 1 5 0.0 10.620499 0.0000000 14.868700 0 0 0
1162 1 5 0.0 10.620499 0.0000000 19.116899 0 0 0
1163 1 5 0.0 10.620499 0.0000000 23.365100 0 0 0
1164 1 5 0.0 10.620499 0.0000000 27.613300 0 0 0
1165 1 5 0.0 10.620499 0.0000000 31.861499 0 0 0
1166 1 5 0.0 10.620499 0.0000000 36.109699 0 0 0
1167 1 5 0.0 10.620499 4.2481999 2.1240999 0 0 0
1168 1 5 0.0 10.620499 4.2481999 19.116899 0 0 0
1169 1 5 0.0 10.620499 4.2481999 23.365100 0 0 0
1170 1 5 0.0 10.620499 4.2481999 27.613300 0 0 0
1171 1 5 0.0 10.620499 4.2481999 31.861499 0 0 0
1172 1 5 0.0 10.620499 4.2481999 36.109699 0 0 0
1173 1 5 0.0 10.620499 8.4963998 19.116899 0 0 0
1174 1 5 0.0 10.620499 8.4963998 23.365100 0 0 0
1175 1 5 0.0 10.620499 8.4963998 27.613300 0 0 0
1176 1 5 0.0 10.620499 8.4963998 31.861499 0 0 0
1177 1 5 0.0 10.620499 8.4963998 36.109699 0 0 0
1178 1 5 0.0 10.620499 12.744600 19.116899 0 0 0
1179 1 5 0.0 10.620499 12.744600 23.365100 0 0 0
1180 1 5 0.0 10.620499 12.744600 27.613300 0 0 0
1181 1 5 0.0 10.620499 12.744600 31.861499 0 0 0
1182 1 5 0.0 10.620499 12.744600 36.109699 0 0 0
1183 1 5 0.0 10.620499 16.992799 10.620499 0 0 0
1184 1 5 0.0 10.620499 16.992799 14.868700 0 0 0
1185 1 5 0.0 10.620499 16.992799 19.116899 0 0 0
1186 1 5 0.0 10.620499 16.992799 23.365100 0 0 0
1187 1 5 0.0 10.620499 16.992799 27.613300 0 0 0
1188 1 5 0.0 10.620499 16.992799 31.861499 0 0 0
1189 1 5 0.0 10.620499 16.992799 36.109699 0 0 0
1190 1 5 0.0 10.620499 21.240999 2.1240999 0 0 0
1191 1 5 0.0 10.620499 21.240999 6.3723001 0 0 0
1192 1 5 0.0 10.620499 21.240999 10.620499 0 0 0
1193 1 5 0.0 10.620499 21.240999 14.868700 0 0 0
1194 1 5 0.0 10.620499 21.240999 19.116899 0 0 0
1195 1 5 0.0 10.620499 21.240999 23.365100 0 0 0
1196 1 5 0.0 10.620499 21.240999 31.861499 0 0 0
1197 1 5 0.0 10.620499 21.240999 36.109699 0 0 0
1198 1 5 0.0 10.620499 25.489200 2.1240999 0 0 0
1199 1 5 0.0 10.620499 25.489200 6.3723001 0 0 0
1200 1 5 0.0 10.620499 25.489200 10.620499 0 0 0
1201 1 5 0.0 10.620499 25.489200 14.868700 0 0 0
1202 1 5 0.0 10.620499 25.489200 19.116899 0 0 0
1203 1 5 0.0 10.620499 25.489200 36.109699 0 0 0
1204 1 5 0.0 10.620499 29.737400 2.1240999 0 0 0
1205 1 5 0.0 10.620499 29.737400 6.3723001 0 0 0
1206 1 5 0.0 10.620499 29.737400 10.620499 0 0 0
1207 1 5 0.0 10.620499 29.737400 14.868700 0 0 0
1208 1 5 0.0 10.620499 29.737400 19.116899 0 0 0
1209 1 5 0.0 10.620499 33.985599 2.1240999 0 0 0
1210 1 5 0.0 10.620499 33.985599 6.3723001 0 0 0
1211 1 5 0.0 10.620499 33.985599 10.620499 0 0 0
1212 1 5 0.0 10.620499 33.985599 14.868700 0 0 0
1213 1 5 0.0 10.620499 33.985599 19.116899 0 0 0
1214 1 5 0.0 10.620499 33.985599 36.109699 0 0 0
1215 1 5 0.0 14.868700 0.0000000 2.1240999 0 0 0
1216 1 5 0.0 14.868700 0.0000000 6.3723001 0 0 0
1217 1 5 0.0 14.868700 0.0000000 10.620499 0 0 0
1218 1 5 0.0 14.868700 0.0000000 27.613300 0 0 0
1219 1 5 0.0 14.868700 0.0000000 31.861499 0 0 0
1220 1 5 0.0 14.868700 0.0000000 36.109699 0 0 0
1221 1 5 0.0 14.868700 4.2481999 2.1240999 0 0 0
1222 1 5 0.0 14.868700 4.2481999 6.3723001 0 0 0
1223 1 5 0.0 14.868700 4.2481999 10.620499 0 0 0
1224 1 5 0.0 14.868700 4.2481999 23.365100 0 0 0
1225 1 5 0.0 14.868700 4.2481999 27.613300 0 0 0
1226 1 5 0.0 14.868700 4.2481999 31.861499 0 0 0
1227 1 5 0.0 14.868700 4.2481999 36.109699 0 0 0
1228 1 5 0.0 14.868700 8.4963998 2.1240999 0 0 0
1229 1 5 0.0 14.868700 8.4963998 6.3723001 0 0 0
1230 1 5 0.0 14.868700 8.4963998 19.116899 0 0 0
1231 1 5 0.0 14.868700 8.4963998 23.365100 0 0 0
1232 1 5 0.0 14.868700 8.4963998 27.613300 0 0 0
1233 1 5 0.0 14.868700 8.4963998 31.861499 0 0 0
1234 1 5 0.0 14.868700 8.4963998 36.109699 0 0 0
1235 1 5 0.0 14.868700 12.744600 14.868700 0 0 0
1236 1 5 0.0 14.868700 12.744600 19.116899 0 0 0
1237 1 5 0.0 14.868700 12.744600 23.365100 0 0 0
1238 1 5 0.0 14.868700 12.744600 27.613300 0 0 0
1239 1 5 0.0 14.868700 12.744600 31.861499 0 0 0
1240 1 5 0.0 14.868700 12.744600 36.109699 0 0 0
1241 1 5 0.0 14.868700 16.992799 10.620499 0 0 0
1242 1 5 0.0 14.868700 16.992799 14.868700 0 0 0
1243 1 5 0.0 14.868700 16.992799 19.116899 0 0 0
1244 1 5 0.0 14.868700 16.992799 23.365100 0 0 0
1245 1 5 0.0 14.868700 16.992799 27.613300 0 0 0
1246 1 5 0.0 14.868700 16.992799 31.861499 0 0 0
1247 1 5 0.0 14.868700 21.240999 6.3723001 0 0 0
1248 1 5 0.0 14.868700 21.240999 10.620499 0 0 0
1249 1 5 0.0 14.868700 21.240999 14.868700 0 0 0
1250 1 5 0.0 14.868700 21.240999 19.116899 0 0 0
1251 1 5 0.0 14.868700 21.240999 23.365100 0 0 0
1252 1 5 0.0 14.868700 21.240999 27.613300 0 0 0
1253 1 5 0.0 14.868700 25.489200 2.1240999 0 0 0
1254 1 5 0.0 14.868700 25.489200 6.3723001 0 0 0
1255 1 5 0.0 14.868700 25.489200 10.620499 0 0 0
1256 1 5 0.0 14.868700 25.489200 14.868700 0 0 0
1257 1 5 0.0 14.868700 25.489200 19.116899 0 0 0
1258 1 5 0.0 14.868700 25.489200 23.365100 0 0 0
1259 1 5 0.0 14.868700 29.737400 2.1240999 0 0 0
1260 1 5 0.0 14.868700 29.737400 6.3723001 0 0 0
1261 1 5 0.0 14.868700 29.737400 10.620499 0 0 0
1262 1 5 0.0 14.868700 29.737400 14.868700 0 0 0
1263 1 5 0.0 14.868700 29.737400 19.116899 0 0 0
1264 1 5 0.0 14.868700 29.737400 23.365100 0 0 0
1265 1 5 0.0 14.868700 29.737400 36.109699 0 0 0
1266 1 5 0.0 14.868700 33.985599 2.1240999 0 0 0
1267 1 5 0.0 14.868700 33.985599 6.3723001 0 0 0
1268 1 5 0.0 14.868700 33.985599 10.620499 0 0 0
1269 1 5 0.0 14.868700 33.985599 14.868700 0 0 0
1270 1 5 0.0 14.868700 33.985599 31.861499 0 0 0
1271 1 5 0.0 14.868700 33.985599 36.109699 0 0 0
1272 1 5 0.0 19.116899 0.0000000 2.1240999 0 0 0
1273 1 5 0.0 19.116899 0.0000000 6.3723001 0 0 0
1274 1 5 0.0 19.116899 0.0000000 10.620499 0 0 0
1275 1 5 0.0 19.116899 0.0000000 27.613300 0 0 0
1276 1 5 0.0 19.116899 0.0000000 31.861499 0 0 0
1277 1 5 0.0 19.116899 0.0000000 36.109699 0 0 0
1278 1 5 0.0 19.116899 4.2481999 2.1240999 0 0 0
1279 1 5 0.0 19.116899 4.2481999 6.3723001 0 0 0
1280 1 5 0.0 19.116899 4.2481999 10.620499 0 0 0
1281 1 5 0.0 19.116899 4.2481999 27.613300 0 0 0
1282 1 5 0.0 19.116899 4.2481999 31.861499 0 0 0
1283 1 5 0.0 19.116899 4.2481999 36.109699 0 0 0
1284 1 5 0.0 19.116899 8.4963998 2.1240999 0 0 0
1285 1 5 0.0 19.116899 8.4963998 6.3723001 0 0 0
1286 1 5 0.0 19.116899 8.4963998 10.620499 0 0 0
1287 1 5 0.0 19.116899 8.4963998 14.868700 0 0 0
1288 1 5 0.0 19.116899 8.4963998 23.365100 0 0 0
1289 1 5 0.0 19.116899 8.4963998 27.613300 0 0 0
1290 1 5 0.0 19.116899 8.4963998 31.861499 0 0 0
1291 1 5 0.0 19.116899 8.4963998 36.109699 0 0 0
1292 1 5 0.0 19.116899 12.744600 6.3723001 0 0 0
1293 1 5 0.0 19.116899 12.744600 10.620499 0 0 0
1294 1 5 0.0 19.116899 12.744600 14.868700 0 0 0
1295 1 5 0.0 19.116899 12.744600 19.116899 0 0 0
1296 1 5 0.0 19.116899 12.744600 23.365100 0 0 0
1297 1 5 0.0 19.116899 12.744600 27.613300 0 0 0
1298 1 5 0.0 19.116899 12.744600 31.861499 0 0 0
1299 1 5 0.0 19.116899 16.992799 10.620499 0 0 0
1300 1 5 0.0 19.116899 16.992799 14.868700 0 0 0
1301 1 5 0.0 19.116899 16.992799 19.116899 0 0 0
1302 1 5 0.0 19.116899 16.992799 23.365100 0 0 0
1303 1 5 0.0 19.116899 16.992799 27.613300 0 0 0
1304 1 5 0.0 19.116899 21.240999 10.620499 0 0 0
1305 1 5 0.0 19.116899 21.240999 14.868700 0 0 0
1306 1 5 0.0 19.116899 21.240999 19.116899 0 0 0
1307 1 5 0.0 19.116899 21.240999 23.365100 0 0 0
1308 1 5 0.0 19.116899 21.240999 27.613300 0 0 0
1309 1 5 0.0 19.116899 25.489200 2.1240999 0 0 0
1310 1 5 0.0 19.116899 25.489200 6.3723001 0 0 0
1311 1 5 0.0 19.116899 25.489200 10.620499 0 0 0
1312 1 5 0.0 19.116899 25.489200 14.868700 0 0 0
1313 1 5 0.0 19.116899 25.489200 19.116899 0 0 0
1314 1 5 0.0 19.116899 25.489200 23.365100 0 0 0
1315 1 5 0.0 19.116899 25.489200 27.613300 0 0 0
1316 1 5 0.0 19.116899 29.737400 2.1240999 0 0 0
1317 1 5 0.0 19.116899 29.737400 6.3723001 0 0 0
1318 1 5 0.0 19.116899 29.737400 10.620499 0 0 0
1319 1 5 0.0 19.116899 29.737400 14.868700 0 0 0
1320 1 5 0.0 19.116899 29.737400 19.116899 0 0 0
1321 1 5 0.0 19.116899 29.737400 23.365100 0 0 0
1322 1 5 0.0 19.116899 29.737400 27.613300 0 0 0
1323 1 5 0.0 19.116899 29.737400 31.861499 0 0 0
1324 1 5 0.0 19.116899 29.737400 36.109699 0 0 0
1325 1 5 0.0 19.116899 33.985599 2.1240999 0 0 0
1326 1 5 0.0 19.116899 33.985599 6.3723001 0 0 0
1327 1 5 0.0 19.116899 33.985599 10.620499 0 0 0
1328 1 5 0.0 19.116899 33.985599 27.613300 0 0 0
1329 1 5 0.0 19.116899 33.985599 31.861499 0 0 0
1330 1 5 0.0 19.116899 33.985599 36.109699 0 0 0
1331 1 5 0.0 23.365100 0.0000000 2.1240999 0 0 0
1332 1 5 0.0 23.365100 0.0000000 6.3723001 0 0 0
1333 1 5 0.0 23.365100 0.0000000 10.620499 0 0 0
1334 1 5 0.0 23.365100 0.0000000 27.613300 0 0 0
1335 1 5 0.0 23.365100 0.0000000 31.861499 0 0 0
1336 1 5 0.0 23.365100 0.0000000 36.109699 0 0 0
1337 1 5 0.0 23.365100 4.2481999 2.1240999 0 0 0
1338 1 5 0.0 23.365100 4.2481999 6.3723001 0 0 0
1339 1 5 0.0 23.365100 4.2481999 10.620499 0 0 0
1340 1 5 0.0 23.365100 4.2481999 14.868700 0 0 0
1341 1 5 0.0 23.365100 4.2481999 27.613300 0 0 0
1342 1 5 0.0 23.365100 4.2481999 31.861499 0 0 0
1343 1 5 0.0 23.365100 4.2481999 36.109699 0 0 0
1344 1 5 0.0 23.365100 8.4963998 2.1240999 0 0 0
1345 1 5 0.0 23.365100 8.4963998 6.3723001 0 0 0
1346 1 5 0.0 23.365100 8.4963998 10.620499 0 0 0
1347 1 5 0.0 23.365100 8.4963998 14.868700 0 0 0
1348 1 5 0.0 23.365100 8.4963998 19.116899 0 0 0
1349 1 5 0.0 23.365100 8.4963998 23.365100 0 0 0
1350 1 5 0.0 23.365100 8.4963998 36.109699 0 0 0
1351 1 5 0.0 23.365100 12.744600 2.1240999 0 0 0
1352 1 5 0.0 23.365100 12.744600 6.3723001 0 0 0
1353 1 5 0.0 23.365100 12.744600 10.620499 0 0 0
1354 1 5 0.0 23.365100 12.744600 14.868700 0 0 0
1355 1 5 0.0 23.365100 12.744600 19.116899 0 0 0
1356 1 5 0.0 23.365100 12.744600 23.365100 0 0 0
1357 1 5 0.0 23.365100 12.744600 27.613300 0 0 0
1358 1 5 0.0 23.365100 16.992799 6.3723001 0 0 0
1359 1 5 0.0 23.365100 16.992799 10.620499 0 0 0
1360 1 5 0.0 23.365100 16.992799 14.868700 0 0 0
1361 1 5 0.0 23.365100 16.992799 19.116899 0 0 0
1362 1 5 0.0 23.365100 16.992799 23.365100 0 0 0
1363 1 5 0.0 23.365100 16.992799 27.613300 0 0 0
1364 1 5 0.0 23.365100 21.240999 10.620499 0 0 0
1365 1 5 0.0 23.365100 21.240999 14.868700 0 0 0
1366 1 5 0.0 23.365100 21.240999 19.116899 0 0 0
1367 1 5 0.0 23.365100 21.240999 23.365100 0 0 0
1368 1 5 0.0 23.365100 21.240999 27.613300 0 0 0
1369 1 5 0.0 23.365100 21.240999 31.861499 0 0 0
1370 1 5 0.0 23.365100 25.489200 14.868700 0 0 0
1371 1 5 0.0 23.365100 25.489200 19.116899 0 0 0
1372 1 5 0.0 23.365100 25.489200 23.365100 0 0 0
1373 1 5 0.0 23.365100 25.489200 27.613300 0 0 0
1374 1 5 0.0 23.365100 25.489200 31.861499 0 0 0
1375 1 5 0.0 23.365100 25.489200 36.109699 0 0 0
1376 1 5 0.0 23.365100 29.737400 2.1240999 0 0 0
1377 1 5 0.0 23.365100 29.737400 19.116899 0 0 0
1378 1 5 0.0 23.365100 29.737400 23.365100 0 0 0
1379 1 5 0.0 23.365100 29.737400 27.613300 0 0 0
1380 1 5 0.0 23.365100 29.737400 31.861499 0 0 0
1381 1 5 0.0 23.365100 29.737400 36.109699 0 0 0
1382 1 5 0.0 23.365100 33.985599 2.1240999 0 0 0
1383 1 5 0.0 23.365100 33.985599 6.3723001 0 0 0
1384 1 5 0.0 23.365100 33.985599 23.365100 0 0 0
1385 1 5 0.0 23.365100 33.985599 27.613300 0 0 0
1386 1 5 0.0 23.365100 33.985599 31.861499 0 0 0
1387 1 5 0.0 23.365100 33.985599 36.109699 0 0 0
1388 1 5 0.0 27.613300 0.0000000 2.1240999 0 0 0
1389 1 5 0.0 27.613300 0.0000000 6.3723001 0 0 0
1390 1 5 0.0 27.613300 0.0000000 10.620499 0 0 0
1391 1 5 0.0 27.613300 0.0000000 14.868700 0 0 0
1392 1 5 0.0 27.613300 0.0000000 19.116899 0 0 0
1393 1 5 0.0 27.613300 0.0000000 23.365100 0 0 0
1394 1 5 0.0 27.613300 0.0000000 27.613300 0 0 0
1395 1 5 0.0 27.613300 0.0000000 31.861499 0 0 0
1396 1 5 0.0 27.613300 0.0000000 36.109699 0 0 0
1397 1 5 0.0 27.613300 4.2481999 2.1240999 0 0 0
1398 1 5 0.0 27.613300 4.2481999 6.3723001 0 0 0
1399 1 5 0.0 27.613300 4.2481999 10.620499 0 0 0
1400 1 5 0.0 27.613300 4.2481999 14.868700 0 0 0
1401 1 5 0.0 27.613300 4.2481999 19.116899 0 0 0
1402 1 5 0.0 27.613300 4.2481999 31.861499 0 0 0
1403 1 5 0.0 27.613300 4.2481999 36.109699 0 0 0
1404 1 5 0.0 27.613300 8.4963998 2.1240999 0 0 0
1405 1 5 0.0 27.613300 8.4963998 6.3723001 0 0 0
1406 1 5 0.0 27.613300 8.4963998 10.620499 0 0 0
1407 1 5 0.0 27.613300 8.4963998 14.868700 0 0 0
1408 1 5 0.0 27.613300 8.4963998 19.116899 0 0 0
1409 1 5 0.0 27.613300 12.744600 2.1240999 0 0 0
1410 1 5 0.0 27.613300 12.744600 6.3723001 0 0 0
1411 1 5 0.0 27.613300 12.744600 10.620499 0 0 0
1412 1 5 0.0 27.613300 12.744600 14.868700 0 0 0
1413 1 5 0.0 27.613300 12.744600 19.116899 0 0 0
1414 1 5 0.0 27.613300 16.992799 2.1240999 0 0 0
1415 1 5 0.0 27.613300 16.992799 6.3723001 0 0 0
1416 1 5 0.0 27.613300 16.992799 10.620499 0 0 0
1417 1 5 0.0 27.613300 16.992799 14.868700 0 0 0
1418 1 5 0.0 27.613300 16.992799 19.116899 0 0 0
1419 1 5 0.0 27.613300 16.992799 23.365100 0 0 0
1420 1 5 0.0 27.613300 16.992799 27.613300 0 0 0
1421 1 5 0.0 27.613300 16.992799 31.861499 0 0 0
1422 1 5 0.0 27.613300 16.992799 36.109699 0 0 0
1423 1 5 0.0 27.613300 21.240999 2.1240999 0 0 0
1424 1 5 0.0 27.613300 21.240999 14.868700 0 0 0
1425 1 5 0.0 27.613300 21.240999 19.116899 0 0 0
1426 1 5 0.0 27.613300 21.240999 23.365100 0 0 0
1427 1 5 0.0 27.613300 21.240999 27.613300 0 0 0
1428 1 5 0.0 27.613300 21.240999 31.861499 0 0 0
1429 1 5 0.0 27.613300 21.240999 36.109699 0 0 0
1430 1 5 0.0 27.613300 25.489200 2.1240999 0 0 0
1431 1 5 0.0 27.613300 25.489200 19.116899 0 0 0
1432 1 5 0.0 27.613300 25.489200 23.365100 0 0 0
1433 1 5 0.0 27.613300 25.489200 27.613300 0 0 0
1434 1 5 0.0 27.613300 25.489200 31.861499 0 0 0
1435 1 5 0.0 27.613300 25.489200 36.109699 0 0 0
1436 1 5 0.0 27.613300 29.737400 19.116899 0 0 0
1437 1 5 0.0 27.613300 29.737400 23.365100 0 0 0
1438 1 5 0.0 27.613300 29.737400 27.613300 0 0 0
1439 1 5 0.0 27.613300 29.737400 31.861499 0 0 0
1440 1 5 0.0 27.613300 29.737400 36.109699 0 0 0
1441 1 5 0.0 27.613300 33.985599 2.1240999 0 0 0
1442 1 5 0.0 27.613300 33.985599 14.868700 0 0 0
1443 1 5 0.0 27.613300 33.985599 19.116899 0 0 0
1444 1 5 0.0 27.613300 33.985599 23.365100 0 0 0
1445 1 5 0.0 27.613300 33.985599 27.613300 0 0 0
1446 1 5 0.0 27.613300 33.985599 31.861499 0 0 0
1447 1 5 0.0 27.613300 33.985599 36.109699 0 0 0
1448 1 5 0.0 31.861499 0.0000000 6.3723001 0 0 0
1449 1 5 0.0 31.861499 0.0000000 10.620499 0 0 0
1450 1 5 0.0 31.861499 0.0000000 14.868700 0 0 0
1451 1 5 0.0 31.861499 0.0000000 19.116899 0 0 0
1452 1 5 0.0 31.861499 0.0000000 23.365100 0 0 0
1453 1 5 0.0 31.861499 0.0000000 27.613300 0 0 0
1454 1 5 0.0 31.861499 0.0000000 31.861499 0 0 0
1455 1 5 0.0 31.861499 4.2481999 2.1240999 0 0 0
1456 1 5 0.0 31.861499 4.2481999 6.3723001 0 0 0
1457 1 5 0.0 31.861499 4.2481999 10.620499 0 0 0
1458 1 5 0.0 31.861499 4.2481999 14.868700 0 0 0
1459 1 5 0.0 31.861499 4.2481999 19.116899 0 0 0
1460 1 5 0.0 31.861499 4.2481999 23.365100 0 0 0
1461 1 5 0.0 31.861499 4.2481999 36.109699 0 0 0
1462 1 5 0.0 31.861499 8.4963998 2.1240999 0 0 0
1463 1 5 0.0 31.861499 8.4963998 6.3723001 0 0 0
1464 1 5 0.0 31.861499 8.4963998 10.620499 0 0 0
1465 1 5 0.0 31.861499 8.4963998 14.868700 0 0 0
1466 1 5 0.0 31.861499 8.4963998 19.116899 0 0 0
1467 1 5 0.0 31.861499 8.4963998 36.109699 0 0 0
1468 1 5 0.0 31.861499 12.744600 2.1240999 0 0 0
1469 1 5 0.0 31.861499 12.744600 6.3723001 0 0 0
1470 1 5 0.0 31.861499 12.744600 10.620499 0 0 0
1471 1 5 0.0 31.861499 12.744600 14.868700 0 0 0
1472 1 5 0.0 31.861499 12.744600 19.116899 0 0 0
1473 1 5 0.0 31.861499 12.744600 36.109699 0 0 0
1474 1 5 0.0 31.861499 16.992799 2.1240999 0 0 0
1475 1 5 0.0 31.861499 16.992799 6.3723001 0 0 0
1476 1 5 0.0 31.861499 16.992799 10.620499 0 0 0
1477 1 5 0.0 31.861499 16.992799 14.868700 0 0 0
1478 1 5 0.0 31.861499 16.992799 19.116899 0 0 0
1479 1 5 0.0 31.861499 16.992799 31.861499 0 0 0
1480 1 5 0.0 31.861499 16.992799 36.109699 0 0 0
1481 1 5 0.0 31.861499 21.240999 2.1240999 0 0 0
1482 1 5 0.0 31.861499 21.240999 6.3723001 0 0 0
1483 1 5 0.0 31.861499 21.240999 10.620499 0 0 0
1484 1 5 0.0 31.861499 21.240999 14.868700 0 0 0
1485 1 5 0.0 31.861499 21.240999 27.613300 0 0 0
1486 1 5 0.0 31.861499 21.240999 31.861499 0 0 0
1487 1 5 0.0 31.861499 21.240999 36.109699 0 0 0
1488 1 5 0.0 31.861499 25.489200 2.1240999 0 0 0
1489 1 5 0.0 31.861499 25.489200 6.3723001 0 0 0
1490 1 5 0.0 31.861499 25.489200 23.365100 0 0 0
1491 1 5 0.0 31.861499 25.489200 27.613300 0 0 0
1492 1 5 0.0 31.861499 25.489200 31.861499 0 0 0
1493 1 5 0.0 31.861499 25.489200 36.109699 0 0 0
1494 1 5 0.0 31.861499 29.737400 19.116899 0 0 0
1495 1 5 0.0 31.861499 29.737400 23.365100 0 0 0
1496 1 5 0.0 31.861499 29.737400 27.613300 0 0 0
1497 1 5 0.0 31.861499 29.737400 31.861499 0 0 0
1498 1 5 0.0 31.861499 29.737400 36.109699 0 0 0
1499 1 5 0.0 31.861499 33.985599 10.620499 0 0 0
1500 1 5 0.0 31.861499 33.985599 14.868700 0 0 0
1501 1 5 0.0 31.861499 33.985599 19.116899 0 0 0
1502 1 5 0.0 31.861499 33.985599 23.365100 0 0 0
1503 1 5 0.0 31.861499 33.985599 27.613300 0 0 0
1504 1 5 0.0 31.861499 33.985599 31.861499 0 0 0
1505 1 5 0.0 31.861499 33.985599 36.109699 0 0 0
1506 1 5 0.0 36.109699 0.0000000 10.620499 0 0 0
1507 1 5 0.0 36.109699 0.0000000 14.868700 0 0 0
1508 1 5 0.0 36.109699 0.0000000 19.116899 0 0 0
1509 1 5 0.0 36.109699 0.0000000 23.365100 0 0 0
1510 1 5 0.0 36.109699 0.0000000 27.613300 0 0 0
1511 1 5 0.0 36.109699 4.2481999 2.1240999 0 0 0
1512 1 5 0.0 36.109699 4.2481999 6.3723001 0 0 0
1513 1 5 0.0 36.109699 4.2481999 10.620499 0 0 0
1514 1 5 0.0 36.109699 4.2481999 14.868700 0 0 0
1515 1 5 0.0 36.109699 4.2481999 19.116899 0 0 0
1516 1 5 0.0 36.109699 4.2481999 23.365100 0 0 0
1517 1 5 0.0 36.109699 4.2481999 27.613300 0 0 0
1518 1 5 0.0 36.109699 8.4963998 2.1240999 0 0 0
1519 1 5 0.0 36.109699 8.4963998 6.3723001 0 0 0
1520 1 5 0.0 36.109699 8.4963998 10.620499 0 0 0
1521 1 5 0.0 36.109699 8.4963998 14.868700 0 0 0
1522 1 5 0.0 36.109699 8.4963998 19.116899 0 0 0
1523 1 5 0.0 36.109699 8.4963998 23.365100 0 0 0
1524 1 5 0.0 36.109699 8.4963998 36.109699 0 0 0
1525 1 5 0.0 36.109699 12.744600 2.1240999 0 0 0
1526 1 5 0.0 36.109699 12.744600 6.3723001 0 0 0
1527 1 5 0.0 36.109699 12.744600 10.620499 0 0 0
1528 1 5 0.0 36.109699 12.744600 14.868700 0 0 0
1529 1 5 0.0 36.109699 12.744600 31.861499 0 0 0
1530 1 5 0.0 36.109699 12.744600 36.109699 0 0 0
1531 1 5 0.0 36.109699 16.992799 2.1240999 0 0 0
1532 1 5 0.0 36.109699 16.992799 6.3723001 0 0 0
1533 1 5 0.0 36.109699 16.992799 10.620499 0 0 0
1534 1 5 0.0 36.109699 16.992799 31.861499 0 0 0
1535 1 5 0.0 36.109699 16.992799 36.109699 0 0 0
1536 1 5 0.0 36.109699 21.240999 2.1240999 0 0 0
1537 1 5 0.0 36.109699 21.240999 6.3723001 0 0 0
1538 1 5 0.0 36.109699 21.240999 10.620499 0 0 0
1539 1 5 0.0 36.109699 21.240999 27.613300 0 0 0
1540 1 5 0.0 36.109699 21.240999 31.861499 0 0 0
1541 1 5 0.0 36.109699 21.240999 36.109699 0 0 0
1542 1 5 0.0 36.109699 25.489200 2.1240999 0 0 0
1543 1 5 0.0 36.109699 25.489200 6.3723001 0 0 0
1544 1 5 0.0 36.109699 25.489200 10.620499 0 0 0
1545 1 5 0.0 36.109699 25.489200 23.365100 0 0 0
1546 1 5 0.0 36.109699 25.489200 27.613300 0 0 0
1547 1 5 0.0 36.109699 25.489200 31.861499 0 0 0
1548 1 5 0.0 36.109699 25.489200 36.109699 0 0 0
1549 1 5 0.0 36.109699 29.737400 2.1240999 0 0 0
1550 1 5 0.0 36.109699 29.737400 6.3723001 0 0 0
1551 1 5 0.0 36.109699 29.737400 10.620499 0 0 0
1552 1 5 0.0 36.109699 29.737400 14.868700 0 0 0
1553 1 5 0.0 36.109699 29.737400 19.116899 0 0 0
1554 1 5 0.0 36.109699 29.737400 23.365100 0 0 0
1555 1 5 0.0 36.109699 29.737400 27.613300 0 0 0
1556 1 5 0.0 36.109699 29.737400 31.861499 0 0 0
1557 1 5 0.0 36.109699 29.737400 36.109699 0 0 0
1558 1 5 0.0 36.109699 33.985599 10.620499 0 0 0
1559 1 5 0.0 36.109699 33.985599 14.868700 0 0 0
1560 1 5 0.0 36.109699 33.985599 19.116899 0 0 0
1561 1 5 0.0 36.109699 33.985599 23.365100 0 0 0
1562 1 5 0.0 36.109699 33.985599 27.613300 0 0 0
1563 1 5 0.0 36.109699 33.985599 31.861499 0 0 0
1564 1 5 0.0 2.1240999 2.1240999 12.744600 0 0 0
1565 1 5 0.0 2.1240999 2.1240999 16.992799 0 0 0
1566 1 5 0.0 2.1240999 2.1240999 21.240999 0 0 0
1567 1 5 0.0 2.1240999 2.1240999 25.489200 0 0 0
1568 1 5 0.0 2.1240999 2.1240999 29.737400 0 0 0
1569 1 5 0.0 2.1240999 6.3723001 12.744600 0 0 0
1570 1 5 0.0 2.1240999 6.3723001 16.992799 0 0 0
1571 1 5 0.0 2.1240999 6.3723001 21.240999 0 0 0
1572 1 5 0.0 2.1240999 6.3723001 25.489200 0 0 0
1573 1 5 0.0 2.1240999 6.3723001 29.737400 0 0 0
1574 1 5 0.0 2.1240999 6.3723001 33.985599 0 0 0
1575 1 5 0.0 2.1240999 10.620499 0.0000000 0 0 0
1576 1 5 0.0 2.1240999 10.620499 4.2481999 0 0 0
1577 1 5 0.0 2.1240999 10.620499 16.992799 0 0 0
1578 1 5 0.0 2.1240999 10.620499 21.240999 0 0 0
1579 1 5 0.0 2.1240999 10.620499 25.489200 0 0 0
1580 1 5 0.0 2.1240999 10.620499 29.737400 0 0 0
1581 1 5 0.0 2.1240999 10.620499 33.985599 0 0 0
1582 1 5 0.0 2.1240999 14.868700 0.0000000 0 0 0
1583 1 5 0.0 2.1240999 14.868700 4.2481999 0 0 0
1584 1 5 0.0 2.1240999 14.868700 8.4963998 0 0 0
1585 1 5 0.0 2.1240999 14.868700 21.240999 0 0 0
1586 1 5 0.0 2.1240999 14.868700 25.489200 0 0 0
1587 1 5 0.0 2.1240999 14.868700 29.737400 0 0 0
1588 1 5 0.0 2.1240999 14.868700 33.985599 0 0 0
1589 1 5 0.0 2.1240999 19.116899 0.0000000 0 0 0
1590 1 5 0.0 2.1240999 19.116899 4.2481999 0 0 0
1591 1 5 0.0 2.1240999 19.116899 8.4963998 0 0 0
1592 1 5 0.0 2.1240999 19.116899 29.737400 0 0 0
1593 1 5 0.0 2.1240999 19.116899 33.985599 0 0 0
1594 1 5 0.0 2.1240999 23.365100 0.0000000 0 0 0
1595 1 5 0.0 2.1240999 23.365100 4.2481999 0 0 0
1596 1 5 0.0 2.1240999 23.365100 8.4963998 0 0 0
1597 1 5 0.0 2.1240999 23.365100 12.744600 0 0 0
1598 1 5 0.0 2.1240999 23.365100 29.737400 0 0 0
1599 1 5 0.0 2.1240999 23.365100 33.985599 0 0 0
1600 1 5 0.0 2.1240999 27.613300 0.0000000 0 0 0
1601 1 5 0.0 2.1240999 27.613300 4.2481999 0 0 0
1602 1 5 0.0 2.1240999 27.613300 8.4963998 0 0 0
1603 1 5 0.0 2.1240999 27.613300 12.744600 0 0 0
1604 1 5 0.0 2.1240999 27.613300 16.992799 0 0 0
1605 1 5 0.0 2.1240999 27.613300 21.240999 0 0 0
1606 1 5 0.0 2.1240999 27.613300 25.489200 0 0 0
1607 1 5 0.0 2.1240999 27.613300 29.737400 0 0 0
1608 1 5 0.0 2.1240999 27.613300 33.985599 0 0 0
1609 1 5 0.0 2.1240999 31.861499 4.2481999 0 0 0
1610 1 5 0.0 2.1240999 31.861499 8.4963998 0 0 0
1611 1 5 0.0 2.1240999 31.861499 12.744600 0 0 0
1612 1 5 0.0 2.1240999 31.861499 16.992799 0 0 0
1613 1 5 0.0 2.1240999 31.861499 21.240999 0 0 0
1614 1 5 0.0 2.1240999 31.861499 25.489200 0 0 0
1615 1 5 0.0 2.1240999 31.861499 29.737400 0 0 0
1616 1 5 0.0 2.1240999 36.109699 8.4963998 0 0 0
1617 1 5 0.0 2.1240999 36.109699 12.744600 0 0 0
1618 1 5 0.0 2.1240999 36.109699 16.992799 0 0 0
1619 1 5 0.0 2.1240999 36.109699 21.240999 0 0 0
1620 1 5 0.0 2.1240999 36.109699 25.489200 0 0 0
1621 1 5 0.0 2.1240999 36.109699 29.737400 0 0 0
1622 1 5 0.0 6.3723001 2.1240999 0.0000000 0 0 0
1623 1 5 0.0 6.3723001 2.1240999 12.744600 0 0 0
1624 1 5 0.0 6.3723001 2.1240999 16.992799 0 0 0
1625 1 5 0.0 6.3723001 2.1240999 21.240999 0 0 0
1626 1 5 0.0 6.3723001 2.1240999 25.489200 0 0 0
1627 1 5 0.0 6.3723001 2.1240999 29.737400 0 0 0
1628 1 5 0.0 6.3723001 2.1240999 33.985599 0 0 0
1629 1 5 0.0 6.3723001 6.3723001 0.0000000 0 0 0
1630 1 5 0.0 6.3723001 6.3723001 16.992799 0 0 0
1631 1 5 0.0 6.3723001 6.3723001 21.240999 0 0 0
1632 1 5 0.0 6.3723001 6.3723001 25.489200 0 0 0
1633 1 5 0.0 6.3723001 6.3723001 29.737400 0 0 0
1634 1 5 0.0 6.3723001 6.3723001 33.985599 0 0 0
1635 1 5 0.0 6.3723001 10.620499 0.0000000 0 0 0
1636 1 5 0.0 6.3723001 10.620499 16.992799 0 0 0
1637 1 5 0.0 6.3723001 10.620499 21.240999 0 0 0
1638 1 5 0.0 6.3723001 10.620499 25.489200 0 0 0
1639 1 5 0.0 6.3723001 10.620499 29.737400 0 0 0
1640 1 5 0.0 6.3723001 10.620499 33.985599 0 0 0
1641 1 5 0.0 6.3723001 14.868700 0.0000000 0 0 0
1642 1 5 0.0 6.3723001 14.868700 4.2481999 0 0 0
1643 1 5 0.0 6.3723001 14.868700 16.992799 0 0 0
1644 1 5 0.0 6.3723001 14.868700 21.240999 0 0 0
1645 1 5 0.0 6.3723001 14.868700 25.489200 0 0 0
1646 1 5 0.0 6.3723001 14.868700 29.737400 0 0 0
1647 1 5 0.0 6.3723001 14.868700 33.985599 0 0 0
1648 1 5 0.0 6.3723001 19.116899 0.0000000 0 0 0
1649 1 5 0.0 6.3723001 19.116899 4.2481999 0 0 0
1650 1 5 0.0 6.3723001 19.116899 8.4963998 0 0 0
1651 1 5 0.0 6.3723001 19.116899 12.744600 0 0 0
1652 1 5 0.0 6.3723001 19.116899 25.489200 0 0 0
1653 1 5 0.0 6.3723001 19.116899 29.737400 0 0 0
1654 1 5 0.0 6.3723001 19.116899 33.985599 0 0 0
1655 1 5 0.0 6.3723001 23.365100 0.0000000 0 0 0
1656 1 5 0.0 6.3723001 23.365100 4.2481999 0 0 0
1657 1 5 0.0 6.3723001 23.365100 8.4963998 0 0 0
1658 1 5 0.0 6.3723001 23.365100 12.744600 0 0 0
1659 1 5 0.0 6.3723001 23.365100 16.992799 0 0 0
1660 1 5 0.0 6.3723001 23.365100 29.737400 0 0 0
1661 1 5 0.0 6.3723001 23.365100 33.985599 0 0 0
1662 1 5 0.0 6.3723001 27.613300 0.0000000 0 0 0
1663 1 5 0.0 6.3723001 27.613300 4.2481999 0 0 0
1664 1 5 0.0 6.3723001 27.613300 8.4963998 0 0 0
1665 1 5 0.0 6.3723001 27.613300 12.744600 0 0 0
1666 1 5 0.0 6.3723001 27.613300 16.992799 0 0 0
1667 1 5 0.0 6.3723001 31.861499 4.2481999 0 0 0
1668 1 5 0.0 6.3723001 31.861499 8.4963998 0 0 0
1669 1 5 0.0 6.3723001 31.861499 12.744600 0 0 0
1670 1 5 0.0 6.3723001 31.861499 16.992799 0 0 0
1671 1 5 0.0 6.3723001 31.861499 21.240999 0 0 0
1672 1 5 0.0 6.3723001 31.861499 25.489200 0 0 0
1673 1 5 0.0 6.3723001 36.109699 8.4963998 0 0 0
1674 1 5 0.0 6.3723001 36.109699 12.744600 0 0 0
1675 1 5 0.0 6.3723001 36.109699 16.992799 0 0 0
1676 1 5 0.0 6.3723001 36.109699 21.240999 0 0 0
1677 1 5 0.0 6.3723001 36.109699 25.489200 0 0 0
1678 1 5 0.0 6.3723001 36.109699 29.737400 0 0 0
1679 1 5 0.0 6.3723001 36.109699 33.985599 0 0 0
1680 1 5 0.0 10.620499 2.1240999 0.0000000 0 0 0
1681 1 5 0.0 10.620499 2.1240999 4.2481999 0 0 0
1682 1 5 0.0 10.620499 2.1240999 8.4963998 0 0 0
1683 1 5 0.0 10.620499 2.1240999 12.744600 0 0 0
1684 1 5 0.0 10.620499 2.1240999 16.992799 0 0 0
1685 1 5 0.0 10.620499 2.1240999 21.240999 0 0 0
1686 1 5 0.0 10.620499 2.1240999 25.489200 0 0 0
1687 1 5 0.0 10.620499 2.1240999 29.737400 0 0 0
1688 1 5 0.0 10.620499 2.1240999 33.985599 0 0 0
1689 1 5 0.0 10.620499 6.3723001 0.0000000 0 0 0
1690 1 5 0.0 10.620499 6.3723001 21.240999 0 0 0
1691 1 5 0.0 10.620499 6.3723001 25.489200 0 0 0
1692 1 5 0.0 10.620499 6.3723001 29.737400 0 0 0
1693 1 5 0.0 10.620499 6.3723001 33.985599 0 0 0
1694 1 5 0.0 10.620499 10.620499 0.0000000 0 0 0
1695 1 5 0.0 10.620499 10.620499 21.240999 0 0 0
1696 1 5 0.0 10.620499 10.620499 25.489200 0 0 0
1697 1 5 0.0 10.620499 10.620499 29.737400 0 0 0
1698 1 5 0.0 10.620499 10.620499 33.985599 0 0 0
1699 1 5 0.0 10.620499 14.868700 0.0000000 0 0 0
1700 1 5 0.0 10.620499 14.868700 12.744600 0 0 0
1701 1 5 0.0 10.620499 14.868700 16.992799 0 0 0
1702 1 5 0.0 10.620499 14.868700 21.240999 0 0 0
1703 1 5 0.0 10.620499 14.868700 25.489200 0 0 0
1704 1 5 0.0 10.620499 14.868700 29.737400 0 0 0
1705 1 5 0.0 10.620499 14.868700 33.985599 0 0 0
1706 1 5 0.0 10.620499 19.116899 0.0000000 0 0 0
1707 1 5 0.0 10.620499 19.116899 4.2481999 0 0 0
1708 1 5 0.0 10.620499 19.116899 8.4963998 0 0 0
1709 1 5 0.0 10.620499 19.116899 12.744600 0 0 0
1710 1 5 0.0 10.620499 19.116899 16.992799 0 0 0
1711 1 5 0.0 10.620499 19.116899 21.240999 0 0 0
1712 1 5 0.0 10.620499 19.116899 25.489200 0 0 0
1713 1 5 0.0 10.620499 19.116899 29.737400 0 0 0
1714 1 5 0.0 10.620499 19.116899 33.985599 0 0 0
1715 1 5 0.0 10.620499 23.365100 0.0000000 0 0 0
1716 1 5 0.0 10.620499 23.365100 4.2481999 0 0 0
1717 1 5 0.0 10.620499 23.365100 8.4963998 0 0 0
1718 1 5 0.0 10.620499 23.365100 12.744600 0 0 0
1719 1 5 0.0 10.620499 23.365100 16.992799 0 0 0
1720 1 5 0.0 10.620499 23.365100 21.240999 0 0 0
1721 1 5 0.0 10.620499 23.365100 33.985599 0 0 0
1722 1 5 0.0 10.620499 27.613300 0.0000000 0 0 0
1723 1 5 0.0 10.620499 27.613300 4.2481999 0 0 0
1724 1 5 0.0 10.620499 27.613300 8.4963998 0 0 0
1725 1 5 0.0 10.620499 27.613300 12.744600 0 0 0
1726 1 5 0.0 10.620499 27.613300 16.992799 0 0 0
1727 1 5 0.0 10.620499 31.861499 0.0000000 0 0 0
1728 1 5 0.0 10.620499 31.861499 4.2481999 0 0 0
1729 1 5 0.0 10.620499 31.861499 8.4963998 0 0 0
1730 1 5 0.0 10.620499 31.861499 12.744600 0 0 0
1731 1 5 0.0 10.620499 31.861499 16.992799 0 0 0
1732 1 5 0.0 10.620499 31.861499 21.240999 0 0 0
1733 1 5 0.0 10.620499 36.109699 0.0000000 0 0 0
1734 1 5 0.0 10.620499 36.109699 4.2481999 0 0 0
1735 1 5 0.0 10.620499 36.109699 8.4963998 0 0 0
1736 1 5 0.0 10.620499 36.109699 12.744600 0 0 0
1737 1 5 0.0 10.620499 36.109699 16.992799 0 0 0
1738 1 5 0.0 10.620499 36.109699 21.240999 0 0 0
1739 1 5 0.0 10.620499 36.109699 33.985599 0 0 0
1740 1 5 0.0 14.868700 2.1240999 0.0000000 0 0 0
1741 1 5 0.0 14.868700 2.1240999 4.2481999 0 0 0
1742 1 5 0.0 14.868700 2.1240999 8.4963998 0 0 0
1743 1 5 0.0 14.868700 2.1240999 25.489200 0 0 0
1744 1 5 0.0 14.868700 2.1240999 29.737400 0 0 0
1745 1 5 0.0 14.868700 2.1240999 33.985599 0 0 0
1746 1 5 0.0 14.868700 6.3723001 0.0000000 0 0 0
1747 1 5 0.0 14.868700 6.3723001 4.2481999 0 0 0
1748 1 5 0.0 14.868700 6.3723001 8.4963998 0 0 0
1749 1 5 0.0 14.868700 6.3723001 21.240999 0 0 0
1750 1 5 0.0 14.868700 6.3723001 25.489200 0 0 0
1751 1 5 0.0 14.868700 6.3723001 29.737400 0 0 0
1752 1 5 0.0 14.868700 6.3723001 33.985599 0 0 0
1753 1 5 0.0 14.868700 10.620499 0.0000000 0 0 0
1754 1 5 0.0 14.868700 10.620499 4.2481999 0 0 0
1755 1 5 0.0 14.868700 10.620499 16.992799 0 0 0
1756 1 5 0.0 14.868700 10.620499 21.240999 0 0 0
1757 1 5 0.0 14.868700 10.620499 25.489200 0 0 0
1758 1 5 0.0 14.868700 10.620499 29.737400 0 0 0
1759 1 5 0.0 14.868700 10.620499 33.985599 0 0 0
1760 1 5 0.0 14.868700 14.868700 8.4963998 0 0 0
1761 1 5 0.0 14.868700 14.868700 12.744600 0 0 0
1762 1 5 0.0 14.868700 14.868700 16.992799 0 0 0
1763 1 5 0.0 14.868700 14.868700 21.240999 0 0 0
1764 1 5 0.0 14.868700 14.868700 25.489200 0 0 0
1765 1 5 0.0 14.868700 14.868700 29.737400 0 0 0
1766 1 5 0.0 14.868700 14.868700 33.985599 0 0 0
1767 1 5 0.0 14.868700 19.116899 8.4963998 0 0 0
1768 1 5 0.0 14.868700 19.116899 12.744600 0 0 0
1769 1 5 0.0 14.868700 19.116899 16.992799 0 0 0
1770 1 5 0.0 14.868700 19.116899 21.240999 0 0 0
1771 1 5 0.0 14.868700 19.116899 25.489200 0 0 0
1772 1 5 0.0 14.868700 19.116899 29.737400 0 0 0
1773 1 5 0.0 14.868700 23.365100 4.2481999 0 0 0
1774 1 5 0.0 14.868700 23.365100 8.4963998 0 0 0
1775 1 5 0.0 14.868700 23.365100 12.744600 0 0 0
1776 1 5 0.0 14.868700 23.365100 16.992799 0 0 0
1777 1 5 0.0 14.868700 23.365100 21.240999 0 0 0
1778 1 5 0.0 14.868700 23.365100 25.489200 0 0 0
1779 1 5 0.0 14.868700 27.613300 0.0000000 0 0 0
1780 1 5 0.0 14.868700 27.613300 4.2481999 0 0 0
1781 1 5 0.0 14.868700 27.613300 8.4963998 0 0 0
1782 1 5 0.0 14.868700 27.613300 12.744600 0 0 0
1783 1 5 0.0 14.868700 27.613300 16.992799 0 0 0
1784 1 5 0.0 14.868700 27.613300 21.240999 0 0 0
1785 1 5 0.0 14.868700 31.861499 0.0000000 0 0 0
1786 1 5 0.0 14.868700 31.861499 4.2481999 0 0 0
1787 1 5 0.0 14.868700 31.861499 8.4963998 0 0 0
1788 1 5 0.0 14.868700 31.861499 12.744600 0 0 0
1789 1 5 0.0 14.868700 31.861499 16.992799 0 0 0
1790 1 5 0.0 14.868700 31.861499 33.985599 0 0 0
1791 1 5 0.0 14.868700 36.109699 0.0000000 0 0 0
1792 1 5 0.0 14.868700 36.109699 4.2481999 0 0 0
1793 1 5 0.0 14.868700 36.109699 8.4963998 0 0 0
1794 1 5 0.0 14.868700 36.109699 12.744600 0 0 0
1795 1 5 0.0 14.868700 36.109699 29.737400 0 0 0
1796 1 5 0.0 14.868700 36.109699 33.985599 0 0 0
1797 1 5 0.0 19.116899 2.1240999 0.0000000 0 0 0
1798 1 5 0.0 19.116899 2.1240999 4.2481999 0 0 0
1799 1 5 0.0 19.116899 2.1240999 8.4963998 0 0 0
1800 1 5 0.0 19.116899 2.1240999 29.737400 0 0 0
1801 1 5 0.0 19.116899 2.1240999 33.985599 0 0 0
1802 1 5 0.0 19.116899 6.3723001 0.0000000 0 0 0
1803 1 5 0.0 19.116899 6.3723001 4.2481999 0 0 0
1804 1 5 0.0 19.116899 6.3723001 8.4963998 0 0 0
1805 1 5 0.0 19.116899 6.3723001 12.744600 0 0 0
1806 1 5 0.0 19.116899 6.3723001 25.489200 0 0 0
1807 1 5 0.0 19.116899 6.3723001 29.737400 0 0 0
1808 1 5 0.0 19.116899 6.3723001 33.985599 0 0 0
1809 1 5 0.0 19.116899 10.620499 4.2481999 0 0 0
1810 1 5 0.0 19.116899 10.620499 8.4963998 0 0 0
1811 1 5 0.0 19.116899 10.620499 12.744600 0 0 0
1812 1 5 0.0 19.116899 10.620499 16.992799 0 0 0
1813 1 5 0.0 19.116899 10.620499 21.240999 0 0 0
1814 1 5 0.0 19.116899 10.620499 25.489200 0 0 0
1815 1 5 0.0 19.116899 10.620499 29.737400 0 0 0
1816 1 5 0.0 19.116899 10.620499 33.985599 0 0 0
1817 1 5 0.0 19.116899 14.868700 8.4963998 0 0 0
1818 1 5 0.0 19.116899 14.868700 12.744600 0 0 0
1819 1 5 0.0 19.116899 14.868700 16.992799 0 0 0
1820 1 5 0.0 19.116899 14.868700 21.240999 0 0 0
1821 1 5 0.0 19.116899 14.868700 25.489200 0 0 0
1822 1 5 0.0 19.116899 14.868700 29.737400 0 0 0
1823 1 5 0.0 19.116899 19.116899 8.4963998 0 0 0
1824 1 5 0.0 19.116899 19.116899 12.744600 0 0 0
1825 1 5 0.0 19.116899 19.116899 16.992799 0 0 0
1826 1 5 0.0 19.116899 19.116899 21.240999 0 0 0
1827 1 5 0.0 19.116899 19.116899 25.489200 0 0 0
1828 1 5 0.0 19.116899 19.116899 29.737400 0 0 0
1829 1 5 0.0 19.116899 23.365100 8.4963998 0 0 0
1830 1 5 0.0 19.116899 23.365100 12.744600 0 0 0
1831 1 5 0.0 19.116899 23.365100 16.992799 0 0 0
1832 1 5 0.0 19.116899 23.365100 21.240999 0 0 0
1833 1 5 0.0 19.116899 23.365100 25.489200 0 0 0
1834 1 5 0.0 19.116899 23.365100 29.737400 0 0 0
1835 1 5 0.0 19.116899 27.613300 0.0000000 0 0 0
1836 1 5 0.0 19.116899 27.613300 4.2481999 0 0 0
1837 1 5 0.0 19.116899 27.613300 8.4963998 0 0 0
1838 1 5 0.0 19.116899 27.613300 12.744600 0 0 0
1839 1 5 0.0 19.116899 27.613300 16.992799 0 0 0
1840 1 5 0.0 19.116899 27.613300 21.240999 0 0 0
1841 1 5 0.0 19.116899 27.613300 25.489200 0 0 0
1842 1 5 0.0 19.116899 27.613300 29.737400 0 0 0
1843 1 5 0.0 19.116899 27.613300 33.985599 0 0 0
1844 1 5 0.0 19.116899 31.861499 0.0000000 0 0 0
1845 1 5 0.0 19.116899 31.861499 4.2481999 0 0 0
1846 1 5 0.0 19.116899 31.861499 8.4963998 0 0 0
1847 1 5 0.0 19.116899 31.861499 21.240999 0 0 0
1848 1 5 0.0 19.116899 31.861499 25.489200 0 0 0
1849 1 5 0.0 19.116899 31.861499 29.737400 0 0 0
1850 1 5 0.0 19.116899 31.861499 33.985599 0 0 0
1851 1 5 0.0 19.116899 36.109699 0.0000000 0 0 0
1852 1 5 0.0 19.116899 36.109699 4.2481999 0 0 0
1853 1 5 0.0 19.116899 36.109699 8.4963998 0 0 0
1854 1 5 0.0 19.116899 36.109699 29.737400 0 0 0
1855 1 5 0.0 19.116899 36.109699 33.985599 0 0 0
1856 1 5 0.0 23.365100 2.1240999 0.0000000 0 0 0
1857 1 5 0.0 23.365100 2.1240999 4.2481999 0 0 0
1858 1 5 0.0 23.365100 2.1240999 8.4963998 0 0 0
1859 1 5 0.0 23.365100 2.1240999 12.744600 0 0 0
1860 1 5 0.0 23.365100 2.1240999 29.737400 0 0 0
1861 1 5 0.0 23.365100 2.1240999 33.985599 0 0 0
1862 1 5 0.0 23.365100 6.3723001 0.0000000 0 0 0
1863 1 5 0.0 23.365100 6.3723001 4.2481999 0 0 0
1864 1 5 0.0 23.365100 6.3723001 8.4963998 0 0 0
1865 1 5 0.0 23.365100 6.3723001 12.744600 0 0 0
1866 1 5 0.0 23.365100 6.3723001 16.992799 0 0 0
1867 1 5 0.0 23.365100 6.3723001 33.985599 0 0 0
1868 1 5 0.0 23.365100 10.620499 0.0000000 0 0 0
1869 1 5 0.0 23.365100 10.620499 4.2481999 0 0 0
1870 1 5 0.0 23.365100 10.620499 8.4963998 0 0 0
1871 1 5 0.0 23.365100 10.620499 12.744600 0 0 0
1872 1 5 0.0 23.365100 10.620499 16.992799 0 0 0
1873 1 5 0.0 23.365100 10.620499 21.240999 0 0 0
1874 1 5 0.0 23.365100 10.620499 25.489200 0 0 0
1875 1 5 0.0 23.365100 14.868700 4.2481999 0 0 0
1876 1 5 0.0 23.365100 14.868700 8.4963998 0 0 0
1877 1 5 0.0 23.365100 14.868700 12.744600 0 0 0
1878 1 5 0.0 23.365100 14.868700 16.992799 0 0 0
1879 1 5 0.0 23.365100 14.868700 21.240999 0 0 0
1880 1 5 0.0 23.365100 14.868700 25.489200 0 0 0
1881 1 5 0.0 23.365100 14.868700 29.737400 0 0 0
1882 1 5 0.0 23.365100 19.116899 8.4963998 0 0 0
1883 1 5 0.0 23.365100 19.116899 12.744600 0 0 0
1884 1 5 0.0 23.365100 19.116899 16.992799 0 0 0
1885 1 5 0.0 23.365100 19.116899 21.240999 0 0 0
1886 1 5 0.0 23.365100 19.116899 25.489200 0 0 0
1887 1 5 0.0 23.365100 19.116899 29.737400 0 0 0
1888 1 5 0.0 23.365100 23.365100 12.744600 0 0 0
1889 1 5 0.0 23.365100 23.365100 16.992799 0 0 0
1890 1 5 0.0 23.365100 23.365100 21.240999 0 0 0
1891 1 5 0.0 23.365100 23.365100 25.489200 0 0 0
1892 1 5 0.0 23.365100 23.365100 29.737400 0 0 0
1893 1 5 0.0 23.365100 23.365100 33.985599 0 0 0
1894 1 5 0.0 23.365100 27.613300 0.0000000 0 0 0
1895 1 5 0.0 23.365100 27.613300 4.2481999 0 0 0
1896 1 5 0.0 23.365100 27.613300 16.992799 0 0 0
1897 1 5 0.0 23.365100 27.613300 21.240999 0 0 0
1898 1 5 0.0 23.365100 27.613300 25.489200 0 0 0
1899 1 5 0.0 23.365100 27.613300 29.737400 0 0 0
1900 1 5 0.0 23.365100 27.613300 33.985599 0 0 0
1901 1 5 0.0 23.365100 31.861499 0.0000000 0 0 0
1902 1 5 0.0 23.365100 31.861499 4.2481999 0 0 0
1903 1 5 0.0 23.365100 31.861499 21.240999 0 0 0
1904 1 5 0.0 23.365100 31.861499 25.489200 0 0 0
1905 1 5 0.0 23.365100 31.861499 29.737400 0 0 0
1906 1 5 0.0 23.365100 31.861499 33.985599 0 0 0
1907 1 5 0.0 23.365100 36.109699 0.0000000 0 0 0
1908 1 5 0.0 23.365100 36.109699 4.2481999 0 0 0
1909 1 5 0.0 23.365100 36.109699 8.4963998 0 0 0
1910 1 5 0.0 23.365100 36.109699 25.489200 0 0 0
1911 1 5 0.0 23.365100 36.109699 29.737400 0 0 0
1912 1 5 0.0 23.365100 36.109699 33.985599 0 0 0
1913 1 5 0.0 27.613300 2.1240999 0.0000000 0 0 0
1914 1 5 0.0 27.613300 2.1240999 4.2481999 0 0 0
1915 1 5 0.0 27.613300 2.1240999 8.4963998 0 0 0
1916 1 5 0.0 27.613300 2.1240999 12.744600 0 0 0
1917 1 5 0.0 27.613300 2.1240999 16.992799 0 0 0
1918 1 5 0.0 27.613300 2.1240999 29.737400 0 0 0
1919 1 5 0.0 27.613300 2.1240999 33.985599 0 0 0
1920 1 5 0.0 27.613300 6.3723001 0.0000000 0 0 0
1921 1 5 0.0 27.613300 6.3723001 4.2481999 0 0 0
1922 1 5 0.0 27.613300 6.3723001 8.4963998 0 0 0
1923 1 5 0.0 27.613300 6.3723001 12.744600 0 0 0
1924 1 5 0.0 27.613300 6.3723001 16.992799 0 0 0
1925 1 5 0.0 27.613300 10.620499 0.0000000 0 0 0
1926 1 5 0.0 27.613300 10.620499 4.2481999 0 0 0
1927 1 5 0.0 27.613300 10.620499 8.4963998 0 0 0
1928 1 5 0.0 27.613300 10.620499 12.744600 0 0 0
1929 1 5 0.0 27.613300 10.620499 16.992799 0 0 0
1930 1 5 0.0 27.613300 14.868700 0.0000000 0 0 0
1931 1 5 0.0 27.613300 14.868700 4.2481999 0 0 0
1932 1 5 0.0 27.613300 14.868700 8.4963998 0 0 0
1933 1 5 0.0 27.613300 14.868700 12.744600 0 0 0
1934 1 5 0.0 27.613300 14.868700 16.992799 0 0 0
1935 1 5 0.0 27.613300 14.868700 21.240999 0 0 0
1936 1 5 0.0 27.613300 19.116899 0.0000000 0 0 0
1937 1 5 0.0 27.613300 19.116899 4.2481999 0 0 0
1938 1 5 0.0 27.613300 19.116899 8.4963998 0 0 0
1939 1 5 0.0 27.613300 19.116899 12.744600 0 0 0
1940 1 5 0.0 27.613300 19.116899 16.992799 0 0 0
1941 1 5 0.0 27.613300 19.116899 21.240999 0 0 0
1942 1 5 0.0 27.613300 19.116899 25.489200 0 0 0
1943 1 5 0.0 27.613300 19.116899 29.737400 0 0 0
1944 1 5 0.0 27.613300 19.116899 33.985599 0 0 0
1945 1 5 0.0 27.613300 23.365100 0.0000000 0 0 0
1946 1 5 0.0 27.613300 23.365100 16.992799 0 0 0
1947 1 5 0.0 27.613300 23.365100 21.240999 0 0 0
1948 1 5 0.0 27.613300 23.365100 25.489200 0 0 0
1949 1 5 0.0 27.613300 23.365100 29.737400 0 0 0
1950 1 5 0.0 27.613300 23.365100 33.985599 0 0 0
1951 1 5 0.0 27.613300 27.613300 0.0000000 0 0 0
1952 1 5 0.0 27.613300 27.613300 21.240999 0 0 0
1953 1 5 0.0 27.613300 27.613300 25.489200 0 0 0
1954 1 5 0.0 27.613300 27.613300 29.737400 0 0 0
1955 1 5 0.0 27.613300 27.613300 33.985599 0 0 0
1956 1 5 0.0 27.613300 31.861499 0.0000000 0 0 0
1957 1 5 0.0 27.613300 31.861499 16.992799 0 0 0
1958 1 5 0.0 27.613300 31.861499 21.240999 0 0 0
1959 1 5 0.0 27.613300 31.861499 25.489200 0 0 0
1960 1 5 0.0 27.613300 31.861499 29.737400 0 0 0
1961 1 5 0.0 27.613300 31.861499 33.985599 0 0 0
1962 1 5 0.0 27.613300 36.109699 0.0000000 0 0 0
1963 1 5 0.0 27.613300 36.109699 4.2481999 0 0 0
1964 1 5 0.0 27.613300 36.109699 12.744600 0 0 0
1965 1 5 0.0 27.613300 36.109699 16.992799 0 0 0
1966 1 5 0.0 27.613300 36.109699 21.240999 0 0 0
1967 1 5 0.0 27.613300 36.109699 25.489200 0 0 0
1968 1 5 0.0 27.613300 36.109699 29.737400 0 0 0
1969 1 5 0.0 27.613300 36.109699 33.985599 0 0 0
1970 1 5 0.0 31.861499 2.1240999 4.2481999 0 0 0
1971 1 5 0.0 31.861499 2.1240999 8.4963998 0 0 0
1972 1 5 0.0 31.861499 2.1240999 12.744600 0 0 0
1973 1 5 0.0 31.861499 2.1240999 16.992799 0 0 0
1974 1 5 0.0 31.861499 2.1240999 21.240999 0 0 0
1975 1 5 0.0 31.861499 2.1240999 25.489200 0 0 0
1976 1 5 0.0 31.861499 6.3723001 0.0000000 0 0 0
1977 1 5 0.0 31.861499 6.3723001 4.2481999 0 0 0
1978 1 5 0.0 31.861499 6.3723001 8.4963998 0 0 0
1979 1 5 0.0 31.861499 6.3723001 12.744600 0 0 0
1980 1 5 0.0 31.861499 6.3723001 16.992799 0 0 0
1981 1 5 0.0 31.861499 6.3723001 21.240999 0 0 0
1982 1 5 0.0 31.861499 10.620499 0.0000000 0 0 0
1983 1 5 0.0 31.861499 10.620499 4.2481999 0 0 0
1984 1 5 0.0 31.861499 10.620499 8.4963998 0 0 0
1985 1 5 0.0 31.861499 10.620499 12.744600 0 0 0
1986 1 5 0.0 31.861499 10.620499 16.992799 0 0 0
1987 1 5 0.0 31.861499 10.620499 21.240999 0 0 0
1988 1 5 0.0 31.861499 14.868700 0.0000000 0 0 0
1989 1 5 0.0 31.861499 14.868700 4.2481999 0 0 0
1990 1 5 0.0 31.861499 14.868700 8.4963998 0 0 0
1991 1 5 0.0 31.861499 14.868700 12.744600 0 0 0
1992 1 5 0.0 31.861499 14.868700 16.992799 0 0 0
1993 1 5 0.0 31.861499 14.868700 21.240999 0 0 0
1994 1 5 0.0 31.861499 14.868700 33.985599 0 0 0
1995 1 5 0.0 31.861499 19.116899 0.0000000 0 0 0
1996 1 5 0.0 31.861499 19.116899 4.2481999 0 0 0
1997 1 5 0.0 31.861499 19.116899 8.4963998 0 0 0
1998 1 5 0.0 31.861499 19.116899 12.744600 0 0 0
1999 1 5 0.0 31.861499 19.116899 16.992799 0 0 0
2000 1 5 0.0 31.861499 19.116899 29.737400 0 0 0
2001 1 5 0.0 31.861499 19.116899 33.985599 0 0 0
2002 1 5 0.0 31.861499 23.365100 0.0000000 0 0 0
2003 1 5 0.0 31.861499 23.365100 4.2481999 0 0 0
2004 1 5 0.0 31.861499 23.365100 8.4963998 0 0 0
2005 1 5 0.0 31.861499 23.365100 25.489200 0 0 0
2006 1 5 0.0 31.861499 23.365100 29.737400 0 0 0
2007 1 5 0.0 31.861499 23.365100 33.985599 0 0 0
2008 1 5 0.0 31.861499 27.613300 0.0000000 0 0 0
2009 1 5 0.0 31.861499 27.613300 4.2481999 0 0 0
2010 1 5 0.0 31.861499 27.613300 21.240999 0 0 0
2011 1 5 0.0 31.861499 27.613300 25.489200 0 0 0
2012 1 5 0.0 31.861499 27.613300 29.737400 0 0 0
2013 1 5 0.0 31.861499 27.613300 33.985599 0 0 0
2014 1 5 0.0 31.861499 31.861499 0.0000000 0 0 0
2015 1 5 0.0 31.861499 31.861499 16.992799 0 0 0
2016 1 5 0.0 31.861499 31.861499 21.240999 0 0 0
2017 1 5 0.0 31.861499 31.861499 25.489200 0 0 0
2018 1 5 0.0 31.861499 31.861499 29.737400 0 0 0
2019 1 5 0.0 31.861499 31.861499 33.985599 0 0 0
2020 1 5 0.0 31.861499 36.109699 8.4963998 0 0 0
2021 1 5 0.0 31.861499 36.109699 12.744600 0 0 0
2022 1 5 0.0 31.861499 36.109699 16.992799 0 0 0
2023 1 5 0.0 31.861499 36.109699 21.240999 0 0 0
2024 1 5 0.0 31.861499 36.109699 25.489200 0 0 0
2025 1 5 0.0 31.861499 36.109699 29.737400 0 0 0
2026 1 5 0.0 31.861499 36.109699 33.985599 0 0 0
2027 1 5 0.0 36.109699 2.1240999 8.4963998 0 0 0
2028 1 5 0.0 36.109699 2.1240999 12.744600 0 0 0
2029 1 5 0.0 36.109699 2.1240999 16.992799 0 0 0
2030 1 5 0.0 36.109699 2.1240999 21.240999 0 0 0
2031 1 5 0.0 36.109699 2.1240999 25.489200 0 0 0
2032 1 5 0.0 36.109699 2.1240999 29.737400 0 0 0
2033 1 5 0.0 36.109699 6.3723001 0.0000000 0 0 0
2034 1 5 0.0 36.109699 6.3723001 4.2481999 0 0 0
2035 1 5 0.0 36.109699 6.3723001 8.4963998 0 0 0
2036 1 5 0.0 36.109699 6.3723001 12.744600 0 0 0
2037 1 5 0.0 36.109699 6.3723001 16.992799 0 0 0
2038 1 5 0.0 36.109699 6.3723001 21.240999 0 0 0
2039 1 5 0.0 36.109699 6.3723001 25.489200 0 0 0
2040 1 5 0.0 36.109699 10.620499 0.0000000 0 0 0
2041 1 5 0.0 36.109699 10.620499 4.2481999 0 0 0
2042 1 5 0.0 36.109699 10.620499 8.4963998 0 0 0
2043 1 5 0.0 36.109699 10.620499 12.744600 0 0 0
2044 1 5 0.0 36.109699 10.620499 16.992799 0 0 0
2045 1 5 0.0 36.109699 10.620499 21.240999 0 0 0
2046 1 5 0.0 36.109699 10.620499 25.489200 0 0 0
2047 1 5 0.0 36.109699 10.620499 33.985599 0 0 0
2048 1 5 0.0 36.109699 14.868700 0.0000000 0 0 0
2049 1 5 0.0 36.109699 14.868700 4.2481999 0 0 0
2050 1 5 0.0 36.109699 14.868700 8.4963998 0 0 0
2051 1 5 0.0 36.109699 14.868700 12.744600 0 0 0
2052 1 5 0.0 36.109699 14.868700 29.737400 0 0 0
2053 1 5 0.0 36.109699 14.868700 33.985599 0 0 0
2054 1 5 0.0 36.109699 19.116899 0.0000000 0 0 0
2055 1 5 0.0 36.109699 19.116899 4.2481999 0 0 0
2056 1 5 0.0 36.109699 19.116899 8.4963998 0 0 0
2057 1 5 0.0 36.109699 19.116899 29.737400 0 0 0
2058 1 5 0.0 36.109699 19.116899 33.985599 0 0 0
2059 1 5 0.0 36.109699 23.365100 0.0000000 0 0 0
2060 1 5 0.0 36.109699 23.365100 4.2481999 0 0 0
2061 1 5 0.0 36.109699 23.365100 8.4963998 0 0 0
2062 1 5 0.0 36.109699 23.365100 25.489200 0 0 0
2063 1 5 0.0 36.109699 23.365100 29.737400 0 0 0
2064 1 5 0.0 36.109699 23.365100 33.985599 0 0 0
2065 1 5 0.0 36.109699 27.613300 0.0000000 0 0 0
2066 1 5 0.0 36.109699 27.613300 4.2481999 0 0 0
2067 1 5 0.0 36.109699 27.613300 8.4963998 0 0 0
2068 1 5 0.0 36.109699 27.613300 21.240999 0 0 0
2069 1 5 0.0 36.109699 27.613300 25.489200 0 0 0
2070 1 5 0.0 36.109699 27.613300 29.737400 0 0 0
2071 1 5 0.0 36.109699 27.613300 33.985599 0 0 0
2072 1 5 0.0 36.109699 31.861499 8.4963998 0 0 0
2073 1 5 0.0 36.109699 31.861499 12.744600 0 0 0
2074 1 5 0.0 36.109699 31.861499 16.992799 0 0 0
2075 1 5 0.0 36.109699 31.861499 21.240999 0 0 0
2076 1 5 0.0 36.109699 31.861499 25.489200 0 0 0
2077 1 5 0.0 36.109699 31.861499 29.737400 0 0 0
2078 1 5 0.0 36.109699 31.861499 33.985599 0 0 0
2079 1 5 0.0 36.109699 36.109699 8.4963998 0 0 0
2080 1 5 0.0 36.109699 36.109699 12.744600 0 0 0
2081 1 5 0.0 36.109699 36.109699 16.992799 0 0 0
2082 1 5 0.0 36.109699 36.109699 21.240999 0 0 0
2083 1 5 0.0 36.109699 36.109699 25.489200 0 0 0
2084 1 5 0.0 36.109699 36.109699 29.737400 0 0 0
