# Supplementary material
Source: publisher figshare collection journal article supplement (https://rs.figshare.com/ndownloader/files/37464464)
Supplement: Supplementary file 2 [file 37464464 › Ordered_Nanoporous_Metals_SI/Xylenes_Ag_CRIst3_Diffusion/1a_ag_CRIst3_orthoxylene_jalkanen/0deposit/in.lmp]

####### insercion de benceno en caja

####### preambulo
units		metal
atom_style      full
boundary        p p p 

####### definimos la region donde meteremos las moleculas
region          box block 0 38.2338 0 38.2338 0 38.2338
create_box      5 box bond/types 4 angle/types 5 dihedral/types 7 extra/bond/per/atom 4 extra/angle/per/atom 10 extra/dihedral/per/atom 12

####### introducir estructura foam
read_data       cri_st3_ag_foam.data add merge

####### definimos el ff previamente definido el tipo en la region
mass            1  12.01000
mass            2   1.00797
mass            3  12.01000
mass            4   1.00797
mass            5 107.90000 

pair_style      hybrid eam/alloy morse 10 lj/cut/coul/cut 10.0
#pair_modify     tail yes
pair_coeff      * * eam/alloy Ag.Sheng.lammps.eam NULL NULL NULL NULL Ag
pair_coeff      1 1 lj/cut/coul/cut 0.00301 3.5500
pair_coeff      1 2 lj/cut/coul/cut 0.00197 2.9850
pair_coeff      1 3 lj/cut/coul/cut 0.00292 3.5250
pair_coeff      1 4 lj/cut/coul/cut 0.00129 3.0250
pair_coeff      2 2 lj/cut/coul/cut 0.00129 2.4200
pair_coeff      2 3 lj/cut/coul/cut 0.00191 2.9600
pair_coeff      2 4 lj/cut/coul/cut 0.00129 2.4600
pair_coeff      3 3 lj/cut/coul/cut 0.00284 3.5000
pair_coeff      3 4 lj/cut/coul/cut 0.00304 3.5500
pair_coeff      4 4 lj/cut/coul/cut 0.00191 3.0000
pair_coeff      1 5 morse 0.01088439 1.20 3.17
pair_coeff      2 5 morse 0.00028620 1.51 3.61
pair_coeff      3 5 morse 0.03035000 1.35 2.65
pair_coeff      4 5 morse 0.00028620 1.51 3.61

bond_style      harmonic
bond_coeff      1 20.1670 1.40000
bond_coeff      2 15.7810 1.08000
bond_coeff      3 13.6310 1.51000
bond_coeff      4 14.6200 1.09000

angle_style     harmonic
angle_coeff     1 2.7090 120.00000
angle_coeff     2 1.5050 120.00000
angle_coeff     3 3.0100 120.00000
angle_coeff     4 1.5050 109.50000
angle_coeff     5 1.4190 107.80000

dihedral_style  opls
dihedral_coeff  1 0.0 0.31175 0.0 0.0
dihedral_coeff  2 0.0 0.31175 0.0 0.0
dihedral_coeff  3 0.0 0.31175 0.0 0.0
dihedral_coeff  4 0.0 0.31175 0.0 0.0
dihedral_coeff  5 0.0 0.31175 0.0 0.0
dihedral_coeff  6 0.0 0.31175 0.0 0.0
dihedral_coeff  7 0.0 0.0 0.0 0.0

#######definimos el grupo y la molecula que vamos a añadir
group		addatoms type 1 2 3 4
molecule        xylene molecule.o-xylene

#######definir lo que queremos que compute en la salida Y definir el formato
compute		add addatoms temp
compute_modify	add dynamic yes extra 3

thermo_style	custom step atoms temp epair etotal press
thermo          100
thermo_modify	temp add lost/bond ignore lost warn

#######fijar el tipo de calculo, en este caso depositar moleculas
fix		1 all deposit 35 0 1 54321 region box near 1.5 mol xylene

#######solicitar salida en diferentes formatos antes y durante la simulacion
write_data      system.*.data
dump        	dumptrajxyz all xyz 1000 dump.*.xyz
dump_modify 	dumptrajxyz element C H C H Ag

#######correr
run             2000

#######solicitar salida en diferentes formatos despues de la simulacion
write_data      system.*.data
