# Supplementary material
Source: publisher figshare collection journal article supplement (https://rs.figshare.com/ndownloader/files/37464464)
Supplement: Supplementary file 2 [file 37464464 › Ordered_Nanoporous_Metals_SI/Xylenes_Ag_CRIst3_Diffusion/1a_ag_CRIst3_orthoxylene_jalkanen/0deposit/molecule.o-xylene]

# o-xylene molecule

18 atoms
18 bonds
30 angles
36 dihedrals

Charges

1   0.060
2  -0.065
3   0.060
4   0.060
5  -0.115
6  -0.115
7  -0.115
8  -0.115
9  -0.115
10 -0.115
11  0.115
12  0.115
13  0.115
14 -0.065
15  0.115
16  0.060
17  0.060
18  0.060

Coords

1  0.524131162 -0.707579217 -0.667584586
2  1.118490000  0.000000000  0.000000000
3  1.992574383  0.433973283 -0.589273823
4  0.441788809  0.846157606  0.354531748
5  1.634200000 -0.743800000  1.172210000
6  1.204440000 -2.056380000  1.406700000
7  1.681000000 -2.763630000  2.508370000
8  2.589580000 -2.164950000  3.386010000
9  3.020960000 -0.853630000  3.155810000
10 2.546170000 -0.149550000  2.051180000
11 0.462534146 -2.548971071  0.694991002
12 1.330043154 -3.832067879  2.695104431
13 3.759977961 -0.362735487  3.871683583
14 3.012185774  1.235380395  1.810020095
15 2.977890049 -2.744789495  4.287454076
16 3.236599898  1.373084351  0.700842076
17 3.958183211  1.428942409  2.416009000
18 2.200489708  1.970164246  2.127576617

Types

1  4
2  3
3  4
4  4
5  1
6  1
7  1
8  1
9  1 
10 1
11 2
12 2
13 2
14 3 
15 2
16 4
17 4
18 4

Bonds

1  4  2  1
2  4  2  3
3  4  2  4
4  3  2  5
5  4  14 16
6  4  14 17
7  4  14 18
8  3  14 10
9  1  5  6 
10 1  6  7
11 1  7  8 
12 1  8  9 
13 1  9  10
14 1  10 5
15 2  6  11
16 2  7  12
17 2  8  15
18 2  9  13

Angles

1  1  5  6  7
2  1  6  7  8
3  1  7  8  9
4  1  8  9  10
5  1  9  10 5 
6  1  10 5  6
7  2  5  6  11
8  2  7  6  11
9  2  6  7  12
10 2  8  7  12
11 2  7  8  15
12 2  9  8  15
13 2  8  9  13
14 2  10 9  13
15 3  6  5  2
16 3  10 5  2
17 3  5  10 14
18 3  9  10 14
19 4  5  2  1
20 4  5  2  3
21 4  5  2  4
22 4  10 14 16
23 4  10 14 17
24 4  10 14 18
25 5  1  2  3 
26 5  1  2  4 
27 5  3  2  4 
28 5  16 14 17
29 5  16 14 18
30 5  17 14 18

Dihedrals

1  1  5  6  7  8
2  1  6  7  8  9
3  1  7  8  9  10
4  1  8  9  10 5
5  1  9  10 5  6
6  1  10 5  6  7
7  2  11 6  7  8
8  2  11 6  5  10
9  2  12 7  8  9
10 2  12 7  6  5
11 2  15 8  9  10
12 2  15 8  7  6
13 2  13 9  10 5
14 2  13 9  8  7
15 3  11 6  7  12
16 3  12 7  8  15
17 3  15 8  9  13
18 4  2  5  6  7
19 4  2  5  10 9
20 4  14 10 9  8 
21 4  14 10 5  6
22 5  2  5  6  11
23 5  14 10 9  13
24 6  2  5  10 14
25 7  1  2  5  6 
26 7  3  2  5  6 
27 7  4  2  5  6 
28 7  1  2  5  10
29 7  3  2  5  10
30 7  4  2  5  10
31 7  16 14 10 9 
32 7  17 14 10 9 
33 7  18 14 10 9 
34 7  16 14 10 5 
35 7  17 14 10 5 
36 7  18 14 10 5 
