# Supplementary material
Source: publisher figshare collection journal article supplement (https://rs.figshare.com/ndownloader/files/37464464)
Supplement: Supplementary file 2 [file 37464464 › Ordered_Nanoporous_Metals_SI/Xylenes_Ag_CRIst3_Diffusion/1a_ag_CRIst3_orthoxylene_jalkanen/1min_nvt_npt/in.lmp]

####### insercion de ortoxileno en caja

####### preambulo
units		metal
atom_style      full
boundary        p p p 

####### introducir estructura foam
kspace_style    pppm 1.0e-4

bond_style      harmonic
angle_style     harmonic
dihedral_style  opls

read_data       cri_st3_ag_foam_35_ortoxylenes.data

pair_style      hybrid eam/alloy morse 10 lj/cut/coul/long 10.0
pair_modify     tail yes
pair_coeff      * * eam/alloy Ag.Sheng.lammps.eam NULL NULL NULL NULL Ag
pair_coeff      1 1 lj/cut/coul/long 0.00301 3.5500
pair_coeff      1 2 lj/cut/coul/long 0.00197 2.9850
pair_coeff      1 3 lj/cut/coul/long 0.00292 3.5250
pair_coeff      1 4 lj/cut/coul/long 0.00129 3.0250
pair_coeff      2 2 lj/cut/coul/long 0.00129 2.4200
pair_coeff      2 3 lj/cut/coul/long 0.00191 2.9600
pair_coeff      2 4 lj/cut/coul/long 0.00129 2.4600
pair_coeff      3 3 lj/cut/coul/long 0.00284 3.5000
pair_coeff      3 4 lj/cut/coul/long 0.00304 3.5500
pair_coeff      4 4 lj/cut/coul/long 0.00191 3.0000
pair_coeff      1 5 morse 0.01088439 1.20 3.17
pair_coeff      2 5 morse 0.00028620 1.51 3.61
pair_coeff      3 5 morse 0.03035000 1.35 2.65
pair_coeff      4 5 morse 0.00028620 1.51 3.61

####### Define Variables
variable        T0 equal 500.0
variable        T1 equal 300.0

####### Run Minimization
reset_timestep  0
thermo          100
thermo_style    custom step time etotal temp pe press vol cella cellb cellc cellalpha cellbeta cellgamma density

print          'Step 0 started, minimization'

min_style       cg
minimize        0.0 1.0e-10 5000 50000

write_data      system.*.data

####### equilibration nvt
timestep        0.001 # picoseconds

dump            dumptrajxyz all xyz 100000 dump.*.xyz
dump_modify     dumptrajxyz element C H C H Ag

print          'Step 1 started, equilibration nvt'

fix             fxnvt all nvt temp ${T0} ${T0} 0.1 # iso ${PBAR} ${PBAR} 500
run             50000
unfix           fxnvt

write_data      system.100K.*.data

####### equilibration npt

print          'Step 2 started, equilibration npt'

fix             fxnpt all npt temp ${T0} ${T1} 0.1 aniso 1.01325 1.01325 2.0
run             50000
unfix           fxnpt

write_data      system.100K.*.data

####### computar msd y rdf
group           C type 1 3
group           H type 2 4
group           CH type 1 2 3 4
group           Ag type 5

compute         C_msd C msd
compute         H_msd H msd
compute         ortoxylene_msd CH msd
compute         Ag_msd Ag msd

compute         CC_CH_HH_rdf CH rdf 5000 1 1 1 2 2 2
compute         ortoxylene_rdf CH rdf 5000

####### production
print          'Step 3 started, production npt'

reset_timestep  0

fix             C_msd_fix C ave/time 1 1 100 c_C_msd mode vector file C.msd
fix             H_msd_fix H ave/time 1 1 100 c_H_msd mode vector file H.msd
fix             ortoxylene_msd_fix CH ave/time 1 1 100 c_ortoxylene_msd mode vector file ortoxylene.msd
fix             Ag_msd_fix Ag ave/time 1 1 100 c_Ag_msd mode vector file Ag.msd

fix             CC_CH_HH_rdf_fix CH ave/time 1 1 50 c_CC_CH_HH_rdf mode vector file CC_CH_HH.rdf
fix             ortoxylene_rdf_fix CH ave/time 1 1 50 c_ortoxylene_rdf mode vector file ortoxylene.rdf

fix             fxnpt all npt temp ${T1} ${T1} 0.1 aniso 1.01325 1.01325 2.0
run             10000000
unfix           fxnpt

unfix           ortoxylene_rdf_fix
unfix           CC_CH_HH_rdf_fix

unfix           Ag_msd_fix
unfix           ortoxylene_msd_fix
unfix           H_msd_fix
unfix           C_msd_fix

write_data      system.*.data

print          "All done"
