# Supplementary material
Source: publisher figshare collection journal article supplement (https://rs.figshare.com/ndownloader/files/37464464)
Supplement: Supplementary file 2 [file 37464464 › Ordered_Nanoporous_Metals_SI/Xylenes_Ag_CRIst3_Diffusion/1b_ag_CRIst3_metaxylene_jalkanen/0deposit/molecule.metaxylene]

# o-xylene molecule

18 atoms
18 bonds
30 angles
36 dihedrals

Charges

1   0.060
2  -0.065
3   0.060
4   0.060
5  -0.115
6  -0.115
7  -0.115
8  -0.115
9  -0.115
10 -0.115
11  0.115
12  0.115
13  0.115
14  0.115
15 -0.065
16  0.060
17  0.060
18  0.060

Coords

1       0.000000000    0.000000000    0.000000000
2       1.118740000    0.000000000    0.000000000
3       1.469960000    1.060840000    0.000000000
4       1.466690000   -0.484750000   -0.946660000
5       1.636480000   -0.742470000    1.172050000
6       1.189920000   -2.044510000    1.425460000
7       1.688600000   -2.757540000    2.519220000
8       2.629890000   -2.169020000    3.364200000
9       3.073880000   -0.870390000    3.119430000
10      2.581500000   -0.157540000    2.025440000
11      0.443060000   -2.506140000    0.763500000
12      3.813240000   -0.403260000    3.785890000
13      2.931040000    0.866150000    1.829650000
14      3.028650000   -2.732340000    4.220820000
15      1.204180000   -4.135620000    2.773060000
16      1.409940000   -4.789150000    1.889220000
17      0.100510000   -4.131300000    2.954400000
18      1.704290000   -4.584490000    3.664340000

Types

1  4
2  3
3  4
4  4
5  1
6  1
7  1
8  1
9  1 
10 1
11 2
12 2
13 2
14 2 
15 3
16 4
17 4
18 4

Bonds

1  4  2  1
2  4  2  3
3  4  2  4
4  3  2  5
5  4  15 16
6  4  15 17
7  4  15 18
8  3  15 7 
9  1  5  6 
10 1  6  7
11 1  7  8 
12 1  8  9 
13 1  9  10
14 1  10 5
15 2  6  11
16 2  10 13
17 2  8  14
18 2  9  12

Angles

1  1  5  6  7
2  1  6  7  8
3  1  7  8  9
4  1  8  9  10
5  1  9  10 5 
6  1  10 5  6
7  2  5  6  11
8  2  7  6  11
9  2  8  9  12
10 2  10 9  12
11 2  5  10 13
12 2  9  10 13
13 2  7  8  14
14 2  9  8  14
15 3  6  5  2
16 3  10 5  2
17 3  6  7  15
18 3  8  7  15
19 4  5  2  1
20 4  5  2  3
21 4  5  2  4
22 4  7  15 16
23 4  7  15 17
24 4  7  15 18
25 5  1  2  3 
26 5  1  2  4 
27 5  3  2  4 
28 5  16 15 17
29 5  16 15 18
30 5  17 15 18

Dihedrals

1  1  5  6  7  8
2  1  6  7  8  9
3  1  7  8  9  10
4  1  8  9  10 5
5  1  9  10 5  6
6  1  10 5  6  7
7  2  11 6  7  8
8  2  11 6  5  10
9  2  12 9  8  7
10 2  12 9  10 5
11 2  13 10 9  8 
12 2  13 10 5  6
13 2  14 8  7  6
14 2  14 8  9  10
15 3  14 8  9  12
16 3  12 9  10 13
17 4  15 7  6  5 
18 4  2  5  6  7
19 4  15 7  8  9
20 4  2  5  10 9 
21 5  2  5  10 13
22 5  2  5  6  11
23 5  15 7  6  11
24 5  15 7  8  14
25 6  1  2  5  6 
26 6  3  2  5  6 
27 6  4  2  5  6 
28 6  1  2  5  10
29 6  3  2  5  10
30 6  4  2  5  10
31 6  16 15 7  6 
32 6  17 15 7  6 
33 6  18 15 7  6 
34 6  16 15 7  8 
35 6  17 15 7  8 
36 6  18 15 7  8 
