# Supplementary material
Source: publisher figshare collection journal article supplement (https://rs.figshare.com/ndownloader/files/37464464)
Supplement: Supplementary file 2 [file 37464464 › Ordered_Nanoporous_Metals_SI/Xylenes_Ag_CRIst3_Diffusion/1c_ag_CRIst3_paraxylene_jalkanen/0deposit/molecule.paraxylene]

# o-xylene molecule

18 atoms
18 bonds
30 angles
36 dihedrals

Charges

1   0.060
2  -0.065
3   0.060
4   0.060
5  -0.115
6  -0.115
7  -0.115
8  -0.115
9  -0.115
10 -0.115
11  0.115
12  0.115
13  0.115
14  0.115
15 -0.065
16  0.060
17  0.060
18  0.060

Coords

1       0.000000000    0.000000000    0.000000000
2       1.118490000    0.000000000    0.000000000
3       1.471170000    1.060080000    0.000000000
4       1.464850000   -0.484190000   -0.947280000
5       1.634200000   -0.743800000    1.172210000
6       1.204440000   -2.056380000    1.406700000
7       1.681000000   -2.763630000    2.508370000
8       2.589580000   -2.164950000    3.386010000
9       3.020960000   -0.853630000    3.155810000
10      2.546170000   -0.149550000    2.051180000
11      0.487390000   -2.526310000    0.718300000
12      1.342140000   -3.793490000    2.691620000
13      3.734930000   -0.380450000    3.845450000
14      2.886680000    0.880930000    1.868690000
15      3.089160000   -2.926420000    4.555240000
16      3.600350000   -3.862400000    4.217720000
17      2.237660000   -3.215210000    5.220880000
18      3.815330000   -2.324570000    5.154300000

Types

1  4
2  3
3  4
4  4
5  1
6  1
7  1
8  1
9  1 
10 1
11 2
12 2
13 2
14 2 
15 3
16 4
17 4
18 4

Bonds

1  4  2  1
2  4  2  3
3  4  2  4
4  3  2  5
5  4  15 16
6  4  15 17
7  4  15 18
8  3  15 8 
9  1  5  6 
10 1  6  7
11 1  7  8 
12 1  8  9 
13 1  9  10
14 1  10 5
15 2  6  11
16 2  7  12
17 2  9  13
18 2  10 14

Angles

1  1  5  6  7
2  1  6  7  8
3  1  7  8  9
4  1  8  9  10
5  1  9  10 5 
6  1  10 5  6
7  2  5  6  11
8  2  7  6  11
9  2  6  7  12
10 2  8  7  12
11 2  8  9  13
12 2  10 9  13
13 2  5  10 14
14 2  9  10 14
15 3  6  5  2
16 3  10 5  2
17 3  7  8  15
18 3  9  8  15
19 4  5  2  1
20 4  5  2  3
21 4  5  2  4
22 4  8  15 16
23 4  8  15 17
24 4  8  15 18
25 5  1  2  3 
26 5  1  2  4 
27 5  3  2  4 
28 5  16 15 17
29 5  16 15 18
30 5  17 15 18

Dihedrals

1  1  5  6  7  8
2  1  6  7  8  9
3  1  7  8  9  10
4  1  8  9  10 5
5  1  9  10 5  6
6  1  10 5  6  7
7  2  11 6  7  8
8  2  11 6  5  10
9  2  12 7  8  9
10 2  12 7  6  5
11 2  13 9  8  7 
12 2  13 9  10 5
13 2  14 10 9  8
14 2  14 10 5  6 
15 3  11 6  7  12
16 3  13 9  10 14
17 4  15 8  7  6 
18 4  2  5  6  7
19 4  15 8  9  10
20 4  2  5  10 9 
21 5  2  5  10 14
22 5  2  5  6  11
23 5  15 8  7  12
24 5  15 8  9  13
25 6  1  2  5  6 
26 6  3  2  5  6 
27 6  4  2  5  6 
28 6  1  2  5  10
29 6  3  2  5  10
30 6  4  2  5  10
31 6  16 15 8  7 
32 6  17 15 8  7 
33 6  18 15 8  7 
34 6  16 15 8  9 
35 6  17 15 8  9 
36 6  18 15 8  9 
